# Supplementary material for: Homeostatic plasticity in the retina is associated with maintenance of night vision during retinal degenerative disease
Source: eLife. 2020 Sep 22;9:e59422. doi: 10.7554/eLife.59422 (PMC7529457; doi:10.7554/eLife.59422)
Supplement: Figure 1—source data 1. [file elife-59422-fig1-data1.xlsx]

## Sheet: Figure 1H
	Figure 1H - source data 1
		Average central retina ONL thickness (micrometers)
		Wild-type	RhoP23H/WT, 1 mo	RhoP23H/WT, 3 mo	RhoP23H/WT, 5 mo
	Animal 1	56	48.25	20	15.375
	Animal 2	54.75	45.25	20.875	15.625
	Animal 3	56	43.875	21.125	13.75
	Animal 4	57.25	45.5	22.75	16.125
	Animal 5			23.375

## Sheet: Figure 1J
	Figure 1J - source data 1
		Scotopic a-wave amplitude (microvolts)
		WT					RhoP23H/WT, 1-mo
	Stimulus intensity (cd*s/m2)	Animal 1	Animal 2	Animal 3	Animal 4		Animal 1	Animal 2	Animal 3	Animal 4
	0.01	17.74	15.5	14.9	36.25		19.18	10.62	16.37	8.23
	0.05	53.59	68.445	82.14	74.75		14.74	44.33	39.46	22.39
	0.1	98.03	77.78	119.6	115.5		52.77	49.6	85.29	40.05
	0.5	113.2	160.85	225.2	160		103.3	94.34	124.5	88.71
	1	140.8	217.6	245.3	174.6		92.99	106.6	132.3	74.16
	5	181.1	254.8	272.2	183.5		88.53	124.4	149.9	94.92
	50	222.8	295.95	333	242.6		135.3	135.4	174.2	125.6
	300	218.5	306.5	344.3	239.7		116.1	158.9	179.5	122.2

## Sheet: Figure 1K
	Figure 1K - source data 1
		Whole retina cone count (# of cells)
		WT							RhoP23H/WT, 1-mo							RhoP23H/WT, 3-mo							RhoP23H/WT, 5-mo
		Animal 1	Animal 2	Animal 3	Animal 4	Animal 5	Animal 6		Animal 1	Animal 2	Animal 3	Animal 4	Animal 5			Animal 1	Animal 2	Animal 3	Animal 4	Animal 5	Animal 6		Animal 1	Animal 2	Animal 3	Animal 4	Animal 5	Animal 6	Animal 7
	M-opsin	149540	142078	138828	143882	144693	142631		145865	129881	152171	155072	151004			132259	141919	153002	150173	153567	142840		147135	130686	134668	158370	157358	130864	128979
	S-opsin	146278	124614	136366	144264	137748	137943		134774	154907	141570	134429	152940			145447	142085	143418	136099	145771	154830		149349	144112	146491	160539	149350	130583	128579

## Sheet: Figure 1L
	Figure 1L - source data 1
		Photopic b-wave* amplitude (microvolts)
		WT								RhoP23H/WT, 1-mo									RhoP23H/WT, 3-mo								RhoP23H/WT, 5-mo
	Stimulus intensity (cd*s/m2)	Animal 1	Animal 2	Animal 3	Animal 4	Animal 5	Animal 6			Animal 1	Animal 2	Animal 3	Animal 4	Animal 5	Animal 6	Animal 7	Animal 8		Animal 1	Animal 2	Animal 3	Animal 4	Animal 5	Animal 6	Animal 7		Animal 1	Animal 2	Animal 3	Animal 4	Animal 5
	0.1	20.76	17.99	14.83	10.98	14.52	12.61			13.87	29.97	27.31	25.94	22.01	21.07	22.49	38.95		24.64	24.31	24.86	22.47	19.99	20.77	25.34		12.69	14.38	20.74	12.93	4.431
	1	83.04	84.73	67.99	57.68	92.46	83.06			84.43	107.5	94.44	116.6	71.02	85.12	86.7	113.6		78.76	83.44	93.27	76.99	71.26	84.21	108.2		33.73	35.59	52.24	29.85	18.6
	10	88.36	124.5	85.83	78.5	119.5	133.4			105.6	130.3	127.8	145.9	102	110.9	124.9	145.1		104.3	107.8	140.6	107.8	95.01	113.4	146.6		54.63	58.2	62.96	39.23	24.55
	* measured from a-wave trough
