# Supplementary material for: Homeostatic plasticity in the retina is associated with maintenance of night vision during retinal degenerative disease
Source: eLife. 2020 Sep 22;9:e59422. doi: 10.7554/eLife.59422 (PMC7529457; doi:10.7554/eLife.59422)
Supplement: Figure 2—source data 1. [file elife-59422-fig2-data1.xlsx]

## Sheet: Figure 2G
	Figure 2 - source data 1
	mGluR6 puncta count*
	WT	RhoP23H/WT
Animal 1	433.6	303
Animal 2	427.8	372.8
Animal 3	453.8	357
Animal 4	437	376.25
* per 100 um of ONL length at central retina

## Sheet: Figure 2H
	Figure 2 - source data 1
	Avg mGluR6 puncta size* (µm2)
	WT	RhoP23H/WT
Animal 1	0.4316	0.4402
Animal 2	0.4068	0.4336
Animal 3	0.362	0.4172
Animal 4	0.436667	0.435333
* same imaging location as puncta count
