# Supplementary material for: Homeostatic plasticity in the retina is associated with maintenance of night vision during retinal degenerative disease
Source: eLife. 2020 Sep 22;9:e59422. doi: 10.7554/eLife.59422 (PMC7529457; doi:10.7554/eLife.59422)
Supplement: Figure 3—figure supplement 1—source data 1. [file elife-59422-fig3-figsupp1-data1.xlsx]

## Sheet: Sheet1
	Figure 3 - supplement 1 - source data 1
	Alpha-tubulin (band intensity, arbitrary units)
	WT	RhoP23H/WT
Animal 1	0.308	0.287
Animal 2	0.263	0.342
Animal 3	0.275	0.322
Animal 4		0.28
Animal 5		0.34
Animal 6		0.324
	ERK 1/2 (band intensities, arbitrary units)
	WT	RhoP23H/WT
Animal 1	1.12	0.958
Animal 2	0.906	1.26
Animal 3	0.9	1.36
Animal 4		1.2
Animal 5		1.27
Animal 6		1.2
	Phoshpo-ERK 1/2 (band intensities, arbitrary units)
	WT	RhoP23H/WT
Animal 1	0.131	0.19
Animal 2	0.128	0.256
Animal 3	0.126	0.254
Animal 4		0.281
Animal 5		0.3
Animal 6		0.295
