# Supplementary material for: Homeostatic plasticity in the retina is associated with maintenance of night vision during retinal degenerative disease
Source: eLife. 2020 Sep 22;9:e59422. doi: 10.7554/eLife.59422 (PMC7529457; doi:10.7554/eLife.59422)
Supplement: Figure 3—figure supplement 5—source data 1. [file elife-59422-fig3-figsupp5-data1.xlsx]

## Sheet: Results Grm6 & Trpm1
Experiment Type	Comparative Cт (ΔΔCт)
Instrument Type	QuantStudio(TM) 6 Flex System
Well	Well Position	Sample Name	Target Name	Reporter	RQ	RQ Min	RQ Max	CT	Ct Mean	Ct SD	Delta Ct	Delta Ct Mean	Delta Ct SE	Delta Delta Ct	Automatic Ct Threshold	Tm1	Ct Threshold	Automatic Baseline	Baseline Start	Baseline End	Comments
1	A1	wt 1-17	Actb	SYBR				22.8205	22.8715	0.0864278					TRUE	82.4142	0.259288	TRUE	1	40
2	A2	wt 1-17	Actb	SYBR				22.9713	22.8715	0.0864278					TRUE	82.4142	0.259288	TRUE	1	40
3	A3	wt 1-17	Actb	SYBR				22.8228	22.8715	0.0864278					TRUE	82.4142	0.259288	TRUE	1	40
8	A8	wt 1-22	Actb	SYBR				23.0743	23.1212	0.0663236					TRUE	82.5458	0.259288	TRUE	1	40
9	A9	wt 1-22	Actb	SYBR				23.1681	23.1212	0.0663236					TRUE	82.5458	0.259288	TRUE	1	40
13	A13	wt Z3R	Actb	SYBR				23.1268	23.1663	0.0558402					TRUE	82.5458	0.259288	TRUE	1	40
15	A15	wt Z3R	Actb	SYBR				23.2057	23.1663	0.0558402					TRUE	82.6773	0.259288	TRUE	1	40
16	A16	wt 3-2	Actb	SYBR				21.993	22.0557	0.0886311					TRUE	82.5458	0.259288	TRUE	1	40
17	A17	wt 3-2	Actb	SYBR				22.1184	22.0557	0.0886311					TRUE	82.5458	0.259288	TRUE	1	40
20	A20	wt 3-3	Actb	SYBR				21.726	21.7079	0.0256725					TRUE	82.5458	0.259288	TRUE	1	40
21	A21	wt 3-3	Actb	SYBR				21.6897	21.7079	0.0256725					TRUE	82.4142	0.259288	TRUE	1	40
22	A22	wt 4-3	Actb	SYBR				22.691	22.5251	0.159324					TRUE	82.4142	0.259288	TRUE	1	40
23	A23	wt 4-3	Actb	SYBR				22.3732	22.5251	0.159324					TRUE	82.4142	0.259288	TRUE	1	40
24	A24	wt 4-3	Actb	SYBR				22.5111	22.5251	0.159324					TRUE	82.4142	0.259288	TRUE	1	40
25	B1	wt 1-17	Gadph	SYBR				19.2318	19.2698	0.0538401					TRUE	82.5458	0.209131	TRUE	1	40
26	B2	wt 1-17	Gadph	SYBR				19.3079	19.2698	0.0538401					TRUE	82.5458	0.209131	TRUE	1	40
31	B7	wt 1-22	Gadph	SYBR				18.7699	18.6245	0.13724					TRUE	82.8088	0.209131	TRUE	1	40
32	B8	wt 1-22	Gadph	SYBR				18.6064	18.6245	0.13724					TRUE	82.6773	0.209131	TRUE	1	40
33	B9	wt 1-22	Gadph	SYBR				18.4972	18.6245	0.13724					TRUE	82.8088	0.209131	TRUE	1	40
37	B13	wt Z3R	Gadph	SYBR				19.0021	18.9505	0.128252					TRUE	82.8088	0.209131	TRUE	1	40
38	B14	wt Z3R	Gadph	SYBR				18.8045	18.9505	0.128252					TRUE	82.8088	0.209131	TRUE	1	40
39	B15	wt Z3R	Gadph	SYBR				19.045	18.9505	0.128252					TRUE	82.8088	0.209131	TRUE	1	40
40	B16	wt 3-2	Gadph	SYBR				18.5308	18.5408	0.0141748					TRUE	82.8088	0.209131	TRUE	1	40
41	B17	wt 3-2	Gadph	SYBR				18.5509	18.5408	0.0141748					TRUE	82.8088	0.209131	TRUE	1	40
43	B19	wt 3-3	Gadph	SYBR				18.195	18.205	0.111161					TRUE	82.8088	0.209131	TRUE	1	40
44	B20	wt 3-3	Gadph	SYBR				18.0992	18.205	0.111161					TRUE	82.6773	0.209131	TRUE	1	40
45	B21	wt 3-3	Gadph	SYBR				18.3208	18.205	0.111161					TRUE	82.6773	0.209131	TRUE	1	40
46	B22	wt 4-3	Gadph	SYBR				18.5402	18.5325	0.0109771					TRUE	82.6773	0.209131	TRUE	1	40
48	B24	wt 4-3	Gadph	SYBR				18.5247	18.5325	0.0109771					TRUE	82.6773	0.209131	TRUE	1	40
49	C1	wt 1-17	Sdha	SYBR				23.3732	23.1891	0.173943					TRUE	85.5708	0.319999	TRUE	1	40
50	C2	wt 1-17	Sdha	SYBR				23.0275	23.1891	0.173943					TRUE	85.5708	0.319999	TRUE	1	40
51	C3	wt 1-17	Sdha	SYBR				23.1667	23.1891	0.173943					TRUE	85.5708	0.319999	TRUE	1	40
55	C7	wt 1-22	Sdha	SYBR				23.2136	23.1189	0.133861					TRUE	85.7023	0.319999	TRUE	1	40
57	C9	wt 1-22	Sdha	SYBR				23.0242	23.1189	0.133861					TRUE	85.7023	0.319999	TRUE	1	40
61	C13	wt Z3R	Sdha	SYBR				23.4209	23.5891	0.146362					TRUE	85.7023	0.319999	TRUE	1	40
62	C14	wt Z3R	Sdha	SYBR				23.6586	23.5891	0.146362					TRUE	85.7023	0.319999	TRUE	1	40
63	C15	wt Z3R	Sdha	SYBR				23.6877	23.5891	0.146362					TRUE	85.7023	0.319999	TRUE	1	40
64	C16	wt 3-2	Sdha	SYBR				22.9671	22.9211	0.156907					TRUE	85.7023	0.319999	TRUE	1	40
65	C17	wt 3-2	Sdha	SYBR				23.0499	22.9211	0.156907					TRUE	85.7023	0.319999	TRUE	1	40
66	C18	wt 3-2	Sdha	SYBR				22.7463	22.9211	0.156907					TRUE	85.7023	0.319999	TRUE	1	40
67	C19	wt 3-3	Sdha	SYBR				22.4175	22.5061	0.173912					TRUE	85.7023	0.319999	TRUE	1	40
68	C20	wt 3-3	Sdha	SYBR				22.7065	22.5061	0.173912					TRUE	85.7023	0.319999	TRUE	1	40
69	C21	wt 3-3	Sdha	SYBR				22.3944	22.5061	0.173912					TRUE	85.7023	0.319999	TRUE	1	40
70	C22	wt 4-3	Sdha	SYBR				22.9821	22.9033	0.0871298					TRUE	85.7023	0.319999	TRUE	1	40
71	C23	wt 4-3	Sdha	SYBR				22.8097	22.9033	0.0871298					TRUE	85.7023	0.319999	TRUE	1	40
72	C24	wt 4-3	Sdha	SYBR				22.9181	22.9033	0.0871298					TRUE	85.5708	0.319999	TRUE	1	40
73	D1	wt 1-17	Grm6	SYBR	1	0.860708	1.16183	27.1024	26.9859	0.107212		5.20906	0.0956631	0	TRUE	80.0468	0.258481	TRUE	1	40
74	D2	wt 1-17	Grm6	SYBR	1	0.860708	1.16183	26.8914	26.9859	0.107212		5.20906	0.0956631	0	TRUE	80.0468	0.258481	TRUE	1	40
75	D3	wt 1-17	Grm6	SYBR	1	0.860708	1.16183	26.9638	26.9859	0.107212		5.20906	0.0956631	0	TRUE	80.0468	0.258481	TRUE	1	40
80	D8	wt 1-22	Grm6	SYBR	1.01048	0.889738	1.14761	26.8255	26.8155	0.0140696		5.19402	0.0776389	-0.0150401	TRUE	80.0468	0.258481	TRUE	1	40
81	D9	wt 1-22	Grm6	SYBR	1.01048	0.889738	1.14761	26.8056	26.8155	0.0140696		5.19402	0.0776389	-0.0150401	TRUE	80.0468	0.258481	TRUE	1	40
85	D13	wt Z3R	Grm6	SYBR	0.827711	0.728855	0.939974	27.415	27.3838	0.0440593		5.48186	0.0795728	0.272802	TRUE	80.0468	0.258481	TRUE	1	40
86	D14	wt Z3R	Grm6	SYBR	0.827711	0.728855	0.939974	27.3527	27.3838	0.0440593		5.48186	0.0795728	0.272802	TRUE	80.0468	0.258481	TRUE	1	40
89	D17	wt 3-2	Grm6	SYBR	0.398538	0.268832	0.590825	27.4795	27.7088	0.32432		6.53627	0.240213	1.32721	TRUE	79.9153	0.258481	TRUE	1	40
90	D18	wt 3-2	Grm6	SYBR	0.398538	0.268832	0.590825	27.9381	27.7088	0.32432		6.53627	0.240213	1.32721	TRUE	79.9153	0.258481	TRUE	1	40
91	D19	wt 3-3	Grm6	SYBR	0.488609	0.403854	0.59115	27.1406	27.0487	0.130071		6.24231	0.119187	1.03325	TRUE	79.9153	0.258481	TRUE	1	40
92	D20	wt 3-3	Grm6	SYBR	0.488609	0.403854	0.59115	26.9567	27.0487	0.130071		6.24231	0.119187	1.03325	TRUE	79.9153	0.258481	TRUE	1	40
94	D22	wt 4-3	Grm6	SYBR	0.772818	0.660846	0.903762	26.8292	26.9012	0.101788		5.58086	0.0979244	0.371799	TRUE	79.9153	0.258481	TRUE	1	40
96	D24	wt 4-3	Grm6	SYBR	0.772818	0.660846	0.903762	26.9731	26.9012	0.101788		5.58086	0.0979244	0.371799	TRUE	80.0468	0.258481	TRUE	1	40
97	E1	wt 1-17	Trpm1	SYBR	1	0.8876	1.12663	25.2057	25.2213	0.0221187		3.44449	0.0745962	0	TRUE	82.6773	0.305119	TRUE	1	40
99	E3	wt 1-17	Trpm1	SYBR	1	0.8876	1.12663	25.237	25.2213	0.0221187		3.44449	0.0745962	0	TRUE	82.6773	0.305119	TRUE	1	40
104	E8	wt 1-22	Trpm1	SYBR	1.06844	0.916961	1.24494	25.0232	24.9705	0.074459		3.34899	0.0932786	-0.0955016	TRUE	82.8088	0.305119	TRUE	1	40
105	E9	wt 1-22	Trpm1	SYBR	1.06844	0.916961	1.24494	24.9179	24.9705	0.074459		3.34899	0.0932786	-0.0955016	TRUE	82.8088	0.305119	TRUE	1	40
109	E13	wt Z3R	Trpm1	SYBR	1.08554	0.924212	1.27502	25.3395	25.228	0.124501		3.32608	0.102606	-0.118407	TRUE	82.8088	0.305119	TRUE	1	40
110	E14	wt Z3R	Trpm1	SYBR	1.08554	0.924212	1.27502	25.0937	25.228	0.124501		3.32608	0.102606	-0.118407	TRUE	82.8088	0.305119	TRUE	1	40
111	E15	wt Z3R	Trpm1	SYBR	1.08554	0.924212	1.27502	25.2509	25.228	0.124501		3.32608	0.102606	-0.118407	TRUE	82.8088	0.305119	TRUE	1	40
112	E16	wt 3-2	Trpm1	SYBR	1.18111	1.03529	1.34747	24.3856	24.3769	0.0711182		3.20434	0.0824396	-0.240147	TRUE	82.6773	0.305119	TRUE	1	40
113	E17	wt 3-2	Trpm1	SYBR	1.18111	1.03529	1.34747	24.3018	24.3769	0.0711182		3.20434	0.0824396	-0.240147	TRUE	82.6773	0.305119	TRUE	1	40
114	E18	wt 3-2	Trpm1	SYBR	1.18111	1.03529	1.34747	24.4433	24.3769	0.0711182		3.20434	0.0824396	-0.240147	TRUE	82.6773	0.305119	TRUE	1	40
115	E19	wt 3-3	Trpm1	SYBR	1.7911	1.46287	2.19298	23.4235	23.41	0.181001		2.60365	0.129099	-0.840847	TRUE	82.6773	0.305119	TRUE	1	40
116	E20	wt 3-3	Trpm1	SYBR	1.7911	1.46287	2.19298	23.2226	23.41	0.181001		2.60365	0.129099	-0.840847	TRUE	82.6773	0.305119	TRUE	1	40
117	E21	wt 3-3	Trpm1	SYBR	1.7911	1.46287	2.19298	23.5839	23.41	0.181001		2.60365	0.129099	-0.840847	TRUE	82.6773	0.305119	TRUE	1	40
118	E22	wt 4-3	Trpm1	SYBR	1.28948	1.03865	1.60089	24.2801	24.398	0.166771		3.0777	0.135333	-0.366795	TRUE	82.6773	0.305119	TRUE	1	40
120	E24	wt 4-3	Trpm1	SYBR	1.28948	1.03865	1.60089	24.5159	24.398	0.166771		3.0777	0.135333	-0.366795	TRUE	82.6773	0.305119	TRUE	1	40
196	I4	het 1-16	Actb	SYBR				21.5217	21.4728	0.0692314					TRUE	82.5458	0.259288	TRUE	1	40
198	I6	het 1-16	Actb	SYBR				21.4238	21.4728	0.0692314					TRUE	82.6773	0.259288	TRUE	1	40
199	I7	het 1-19	Actb	SYBR				23.4549	23.4706	0.0202477					TRUE	82.6773	0.259288	TRUE	1	40
200	I8	het 1-19	Actb	SYBR				23.4635	23.4706	0.0202477					TRUE	82.6773	0.259288	TRUE	1	40
201	I9	het 1-19	Actb	SYBR				23.4935	23.4706	0.0202477					TRUE	82.6773	0.259288	TRUE	1	40
202	I10	het Z1R	Actb	SYBR				20.9206	21.0615	0.178887					TRUE	82.6773	0.259288	TRUE	1	40
203	I11	het Z1R	Actb	SYBR				21.2628	21.0615	0.178887					TRUE	82.6773	0.259288	TRUE	1	40
204	I12	het Z1R	Actb	SYBR				21.0013	21.0615	0.178887					TRUE	82.6773	0.259288	TRUE	1	40
205	I13	het Z5R	Actb	SYBR				22.2614	22.1422	0.141858					TRUE	82.6773	0.259288	TRUE	1	40
206	I14	het Z5R	Actb	SYBR				22.18	22.1422	0.141858					TRUE	82.6773	0.259288	TRUE	1	40
207	I15	het Z5R	Actb	SYBR				21.9853	22.1422	0.141858					TRUE	82.6773	0.259288	TRUE	1	40
209	I17	het 3-1	Actb	SYBR				21.4952	21.3905	0.148039					TRUE	82.6773	0.259288	TRUE	1	40
210	I18	het 3-1	Actb	SYBR				21.2858	21.3905	0.148039					TRUE	82.6773	0.259288	TRUE	1	40
211	I19	het 4-1	Actb	SYBR				21.8736	21.8884	0.0129501					TRUE	82.6773	0.259288	TRUE	1	40
212	I20	het 4-1	Actb	SYBR				21.8978	21.8884	0.0129501					TRUE	82.6773	0.259288	TRUE	1	40
213	I21	het 4-1	Actb	SYBR				21.8937	21.8884	0.0129501					TRUE	82.6773	0.259288	TRUE	1	40
214	I22	het 4-2	Actb	SYBR				20.5973	20.7337	0.11839					TRUE	82.6773	0.259288	TRUE	1	40
215	I23	het 4-2	Actb	SYBR				20.7943	20.7337	0.11839					TRUE	82.6773	0.259288	TRUE	1	40
216	I24	het 4-2	Actb	SYBR				20.8095	20.7337	0.11839					TRUE	82.6773	0.259288	TRUE	1	40
220	J4	het 1-16	Gadph	SYBR				18.0214	18.1034	0.0957638					TRUE	82.8088	0.209131	TRUE	1	40
221	J5	het 1-16	Gadph	SYBR				18.0801	18.1034	0.0957638					TRUE	82.8088	0.209131	TRUE	1	40
222	J6	het 1-16	Gadph	SYBR				18.2086	18.1034	0.0957638					TRUE	82.8088	0.209131	TRUE	1	40
223	J7	het 1-19	Gadph	SYBR				19.5765	19.5236	0.0747301					TRUE	82.8088	0.209131	TRUE	1	40
225	J9	het 1-19	Gadph	SYBR				19.4708	19.5236	0.0747301					TRUE	82.8088	0.209131	TRUE	1	40
226	J10	het Z1R	Gadph	SYBR				17.5382	17.4875	0.0440295					TRUE	82.9403	0.209131	TRUE	1	40
227	J11	het Z1R	Gadph	SYBR				17.4589	17.4875	0.0440295					TRUE	82.9403	0.209131	TRUE	1	40
228	J12	het Z1R	Gadph	SYBR				17.4654	17.4875	0.0440295					TRUE	82.9403	0.209131	TRUE	1	40
230	J14	het Z5R	Gadph	SYBR				18.5918	18.6062	0.0203155					TRUE	82.8088	0.209131	TRUE	1	40
231	J15	het Z5R	Gadph	SYBR				18.6206	18.6062	0.0203155					TRUE	82.9403	0.209131	TRUE	1	40
233	J17	het 3-1	Gadph	SYBR				17.8452	17.8612	0.0225705					TRUE	82.9403	0.209131	TRUE	1	40
234	J18	het 3-1	Gadph	SYBR				17.8771	17.8612	0.0225705					TRUE	82.9403	0.209131	TRUE	1	40
235	J19	het 4-1	Gadph	SYBR				18.741	18.5682	0.179589					TRUE	82.9403	0.209131	TRUE	1	40
236	J20	het 4-1	Gadph	SYBR				18.5811	18.5682	0.179589					TRUE	82.9403	0.209131	TRUE	1	40
237	J21	het 4-1	Gadph	SYBR				18.3825	18.5682	0.179589					TRUE	82.9403	0.209131	TRUE	1	40
238	J22	het 4-2	Gadph	SYBR				17.5543	17.4636	0.0813307					TRUE	82.9403	0.209131	TRUE	1	40
239	J23	het 4-2	Gadph	SYBR				17.4391	17.4636	0.0813307					TRUE	82.9403	0.209131	TRUE	1	40
240	J24	het 4-2	Gadph	SYBR				17.3972	17.4636	0.0813307					TRUE	82.9403	0.209131	TRUE	1	40
244	K4	het 1-16	Sdha	SYBR				22.2978	22.4567	0.146052					TRUE	85.8338	0.319999	TRUE	1	40
245	K5	het 1-16	Sdha	SYBR				22.5851	22.4567	0.146052					TRUE	85.8338	0.319999	TRUE	1	40
246	K6	het 1-16	Sdha	SYBR				22.4871	22.4567	0.146052					TRUE	85.8338	0.319999	TRUE	1	40
247	K7	het 1-19	Sdha	SYBR				24.6417	24.7414	0.116937					TRUE	85.8338	0.319999	TRUE	1	40
248	K8	het 1-19	Sdha	SYBR				24.8701	24.7414	0.116937					TRUE	85.8338	0.319999	TRUE	1	40
249	K9	het 1-19	Sdha	SYBR				24.7122	24.7414	0.116937					TRUE	85.8338	0.319999	TRUE	1	40
250	K10	het Z1R	Sdha	SYBR				21.7726	21.8469	0.078006					TRUE	85.8338	0.319999	TRUE	1	40
251	K11	het Z1R	Sdha	SYBR				21.84	21.8469	0.078006					TRUE	85.8338	0.319999	TRUE	1	40
252	K12	het Z1R	Sdha	SYBR				21.9282	21.8469	0.078006					TRUE	85.8338	0.319999	TRUE	1	40
253	K13	het Z5R	Sdha	SYBR				23.0823	23.0047	0.114407					TRUE	85.8338	0.319999	TRUE	1	40
254	K14	het Z5R	Sdha	SYBR				23.0584	23.0047	0.114407					TRUE	85.8338	0.319999	TRUE	1	40
255	K15	het Z5R	Sdha	SYBR				22.8733	23.0047	0.114407					TRUE	85.8338	0.319999	TRUE	1	40
256	K16	het 3-1	Sdha	SYBR				22.3025	22.2946	0.00750736					TRUE	85.8338	0.319999	TRUE	1	40
257	K17	het 3-1	Sdha	SYBR				22.2939	22.2946	0.00750736					TRUE	85.8338	0.319999	TRUE	1	40
258	K18	het 3-1	Sdha	SYBR				22.2875	22.2946	0.00750736					TRUE	85.8338	0.319999	TRUE	1	40
259	K19	het 4-1	Sdha	SYBR				22.7402	22.7203	0.0281892					TRUE	85.8338	0.319999	TRUE	1	40
261	K21	het 4-1	Sdha	SYBR				22.7003	22.7203	0.0281892					TRUE	85.8338	0.319999	TRUE	1	40
262	K22	het 4-2	Sdha	SYBR				21.2916	21.4179	0.109729					TRUE	85.8338	0.319999	TRUE	1	40
263	K23	het 4-2	Sdha	SYBR				21.4721	21.4179	0.109729					TRUE	85.8338	0.319999	TRUE	1	40
264	K24	het 4-2	Sdha	SYBR				21.4899	21.4179	0.109729					TRUE	85.8338	0.319999	TRUE	1	40
268	L4	het 1-16	Grm6	SYBR	0.734527	0.659197	0.818465	26.3257	26.3318	0.00853727		5.65417	0.0676953	0.445113	TRUE	80.0468	0.258481	TRUE	1	40
269	L5	het 1-16	Grm6	SYBR	0.734527	0.659197	0.818465	26.3378	26.3318	0.00853727		5.65417	0.0676953	0.445113	TRUE	80.0468	0.258481	TRUE	1	40
272	L8	het 1-19	Grm6	SYBR	0.906618	0.713572	1.15189	28.0705	27.929	0.200016		5.35049	0.149798	0.141433	TRUE	80.0468	0.258481	TRUE	1	40
273	L9	het 1-19	Grm6	SYBR	0.906618	0.713572	1.15189	27.7876	27.929	0.200016		5.35049	0.149798	0.141433	TRUE	80.0468	0.258481	TRUE	1	40
274	L10	het Z1R	Grm6	SYBR	1.30138	1.15238	1.46964	24.9214	24.961	0.0559737		4.82902	0.0775478	-0.380041	TRUE	80.0468	0.258481	TRUE	1	40
275	L11	het Z1R	Grm6	SYBR	1.30138	1.15238	1.46964	25.0006	24.961	0.0559737		4.82902	0.0775478	-0.380041	TRUE	80.0468	0.258481	TRUE	1	40
278	L14	het Z5R	Grm6	SYBR	1.7905	1.58859	2.01807	25.5861	25.6197	0.0476158		4.3687	0.074855	-0.840359	TRUE	80.0468	0.258481	TRUE	1	40
279	L15	het Z5R	Grm6	SYBR	1.7905	1.58859	2.01807	25.6534	25.6197	0.0476158		4.3687	0.074855	-0.840359	TRUE	80.0468	0.258481	TRUE	1	40
281	L17	het 3-1	Grm6	SYBR	1.43531	1.31571	1.56579	25.2055	25.2031	0.00335826		4.68769	0.0530862	-0.521366	TRUE	80.0468	0.258481	TRUE	1	40
282	L18	het 3-1	Grm6	SYBR	1.43531	1.31571	1.56579	25.2008	25.2031	0.00335826		4.68769	0.0530862	-0.521366	TRUE	80.0468	0.258481	TRUE	1	40
283	L19	het 4-1	Grm6	SYBR	1.63441	1.39268	1.9181	25.6963	25.5592	0.134352		4.50029	0.102073	-0.70877	TRUE	80.0468	0.258481	TRUE	1	40
284	L20	het 4-1	Grm6	SYBR	1.63441	1.39268	1.9181	25.5537	25.5592	0.134352		4.50029	0.102073	-0.70877	TRUE	80.0468	0.258481	TRUE	1	40
285	L21	het 4-1	Grm6	SYBR	1.63441	1.39268	1.9181	25.4277	25.5592	0.134352		4.50029	0.102073	-0.70877	TRUE	80.0468	0.258481	TRUE	1	40
286	L22	het 4-2	Grm6	SYBR	2.03813	1.82889	2.2713	24.0839	24.0535	0.0621848		4.18181	0.0701366	-1.02724	TRUE	80.0468	0.258481	TRUE	1	40
287	L23	het 4-2	Grm6	SYBR	2.03813	1.82889	2.2713	23.982	24.0535	0.0621848		4.18181	0.0701366	-1.02724	TRUE	80.0468	0.258481	TRUE	1	40
288	L24	het 4-2	Grm6	SYBR	2.03813	1.82889	2.2713	24.0947	24.0535	0.0621848		4.18181	0.0701366	-1.02724	TRUE	80.0468	0.258481	TRUE	1	40
292	M4	het 1-16	Trpm1	SYBR	1.29878	1.10131	1.53165	23.8658	23.7449	0.139823		3.06734	0.105181	-0.377153	TRUE	82.6773	0.305119	TRUE	1	40
293	M5	het 1-16	Trpm1	SYBR	1.29878	1.10131	1.53165	23.5918	23.7449	0.139823		3.06734	0.105181	-0.377153	TRUE	82.6773	0.305119	TRUE	1	40
294	M6	het 1-16	Trpm1	SYBR	1.29878	1.10131	1.53165	23.7772	23.7449	0.139823		3.06734	0.105181	-0.377153	TRUE	82.8088	0.305119	TRUE	1	40
295	M7	het 1-19	Trpm1	SYBR	1.12075	0.950811	1.32106	25.8479	25.8586	0.160261		3.28003	0.104869	-0.164461	TRUE	82.6773	0.305119	TRUE	1	40
296	M8	het 1-19	Trpm1	SYBR	1.12075	0.950811	1.32106	26.0239	25.8586	0.160261		3.28003	0.104869	-0.164461	TRUE	82.8088	0.305119	TRUE	1	40
297	M9	het 1-19	Trpm1	SYBR	1.12075	0.950811	1.32106	25.7039	25.8586	0.160261		3.28003	0.104869	-0.164461	TRUE	82.8088	0.305119	TRUE	1	40
298	M10	het Z1R	Trpm1	SYBR	1.55423	1.36884	1.76472	22.8475	22.9403	0.0833584		2.80829	0.0822395	-0.636199	TRUE	82.8088	0.305119	TRUE	1	40
299	M11	het Z1R	Trpm1	SYBR	1.55423	1.36884	1.76472	22.9645	22.9403	0.0833584		2.80829	0.0822395	-0.636199	TRUE	82.8088	0.305119	TRUE	1	40
300	M12	het Z1R	Trpm1	SYBR	1.55423	1.36884	1.76472	23.0089	22.9403	0.0833584		2.80829	0.0822395	-0.636199	TRUE	82.8088	0.305119	TRUE	1	40
302	M14	het Z5R	Trpm1	SYBR	2.19302	1.86438	2.57959	23.6391	23.5626	0.108137		2.31157	0.10157	-1.13292	TRUE	82.8088	0.305119	TRUE	1	40
303	M15	het Z5R	Trpm1	SYBR	2.19302	1.86438	2.57959	23.4861	23.5626	0.108137		2.31157	0.10157	-1.13292	TRUE	82.8088	0.305119	TRUE	1	40
305	M17	het 3-1	Trpm1	SYBR	1.68881	1.44862	1.96884	23.281	23.2039	0.109076		2.68848	0.0936018	-0.756011	TRUE	82.8088	0.305119	TRUE	1	40
306	M18	het 3-1	Trpm1	SYBR	1.68881	1.44862	1.96884	23.1268	23.2039	0.109076		2.68848	0.0936018	-0.756011	TRUE	82.8088	0.305119	TRUE	1	40
307	M19	het 4-1	Trpm1	SYBR	2.0099	1.76974	2.28265	23.5734	23.4963	0.0809443		2.43737	0.0811549	-1.00713	TRUE	82.8088	0.305119	TRUE	1	40
308	M20	het 4-1	Trpm1	SYBR	2.0099	1.76974	2.28265	23.412	23.4963	0.0809443		2.43737	0.0811549	-1.00713	TRUE	82.6773	0.305119	TRUE	1	40
309	M21	het 4-1	Trpm1	SYBR	2.0099	1.76974	2.28265	23.5035	23.4963	0.0809443		2.43737	0.0811549	-1.00713	TRUE	82.6773	0.305119	TRUE	1	40
311	M23	het 4-2	Trpm1	SYBR	2.07894	1.81432	2.38216	22.1978	22.2604	0.0884207		2.38864	0.086829	-1.05585	TRUE	82.6773	0.305119	TRUE	1	40
312	M24	het 4-2	Trpm1	SYBR	2.07894	1.81432	2.38216	22.3229	22.2604	0.0884207		2.38864	0.086829	-1.05585	TRUE	82.6773	0.305119	TRUE	1	40
Analysis Type	Singleplex
Endogenous Control	Actb, Gadph, Sdha
RQ Min/Max Confidence Level	95.0
Reference Sample	wt 1-17

## Sheet: Amplification Data Grm6 & Trpm1
Experiment Type	Comparative Cт (ΔΔCт)
Instrument Type	QuantStudio(TM) 6 Flex System
Well	Cycle	Target Name	Rn	Delta Rn
1	1	Actb	0.0989586	-0.0189943
1	2	Actb	0.105292	-0.015576
1	3	Actb	0.116383	-0.0073992
1	4	Actb	0.124885	-0.0018122
1	5	Actb	0.13191	0.00229817
1	6	Actb	0.13525	0.00272267
1	7	Actb	0.139059	0.00361677
1	8	Actb	0.141579	0.00322262
1	9	Actb	0.142508	0.00123616
1	10	Actb	0.144813	0.000626548
1	11	Actb	0.1475	0.000399005
1	12	Actb	0.149411	-0.000605305
1	13	Actb	0.152439	-0.000491864
1	14	Actb	0.154726	-0.00112004
1	15	Actb	0.157228	-0.001532
1	16	Actb	0.160873	-0.000802289
1	17	Actb	0.164231	-0.000359041
1	18	Actb	0.173104	0.00559874
1	19	Actb	0.187252	0.0168322
1	20	Actb	0.211686	0.0383518
1	21	Actb	0.256537	0.0802877
1	22	Actb	0.336609	0.157445
1	23	Actb	0.466135	0.284056
1	24	Actb	0.669419	0.484425
1	25	Actb	0.941588	0.75368
1	26	Actb	1.26015	1.06933
1	27	Actb	1.58693	1.39319
1	28	Actb	1.88915	1.6925
1	29	Actb	2.15874	1.95917
1	30	Actb	2.39274	2.19025
1	31	Actb	2.58896	2.38356
1	32	Actb	2.75611	2.5478
1	33	Actb	2.88658	2.67535
1	34	Actb	2.99428	2.78014
1	35	Actb	3.07965	2.86259
1	36	Actb	3.14218	2.92221
1	37	Actb	3.1918	2.96892
1	38	Actb	3.22376	2.99795
1	39	Actb	3.25312	3.0244
1	40	Actb	3.27458	3.04295
2	1	Actb	0.18118	-0.0184559
2	2	Actb	0.189104	-0.0141905
2	3	Actb	0.201452	-0.00550144
2	4	Actb	0.208447	-0.00216547
2	5	Actb	0.213992	-0.000279168
2	6	Actb	0.219933	0.00200302
2	7	Actb	0.224867	0.00327845
2	8	Actb	0.228451	0.00320361
2	9	Actb	0.231347	0.00244027
2	10	Actb	0.234184	0.00161904
2	11	Actb	0.237114	0.000890095
2	12	Actb	0.240243	0.000359514
2	13	Actb	0.242838	-0.00070359
2	14	Actb	0.244905	-0.00229537
2	15	Actb	0.249629	-0.00123087
2	16	Actb	0.253558	-0.000960338
2	17	Actb	0.25752	-0.00065775
2	18	Actb	0.267098	0.00526171
2	19	Actb	0.281095	0.0155999
2	20	Actb	0.304247	0.0350933
2	21	Actb	0.346517	0.0737045
2	22	Actb	0.418798	0.142327
2	23	Actb	0.542934	0.262803
2	24	Actb	0.727251	0.443462
2	25	Actb	0.976026	0.688578
2	26	Actb	1.26566	0.974553
2	27	Actb	1.55244	1.25768
2	28	Actb	1.82681	1.52839
2	29	Actb	2.07302	1.77093
2	30	Actb	2.2863	1.98056
2	31	Actb	2.46745	2.15805
2	32	Actb	2.61354	2.30048
2	33	Actb	2.7289	2.41218
2	34	Actb	2.81504	2.49467
2	35	Actb	2.87228	2.54824
2	36	Actb	2.91897	2.59128
2	37	Actb	2.952	2.62065
2	38	Actb	2.98047	2.64546
2	39	Actb	3.00275	2.66408
2	40	Actb	3.01815	2.67582
3	1	Actb	0.166378	-0.0174207
3	2	Actb	0.172896	-0.0138256
3	3	Actb	0.183793	-0.00585203
3	4	Actb	0.191141	-0.00142651
3	5	Actb	0.196379	0.000888401
3	6	Actb	0.200047	0.00163304
3	7	Actb	0.204274	0.00293741
3	8	Actb	0.206372	0.00211292
3	9	Actb	0.209472	0.00228931
3	10	Actb	0.211709	0.00160403
3	11	Actb	0.213639	0.000611309
3	12	Actb	0.216081	0.000130192
3	13	Actb	0.219191	0.000316944
3	14	Actb	0.220466	-0.0013308
3	15	Actb	0.221992	-0.00272777
3	16	Actb	0.22542	-0.00222297
3	17	Actb	0.231602	0.00103652
3	18	Actb	0.24053	0.00704206
3	19	Actb	0.254436	0.0180244
3	20	Actb	0.278388	0.0390541
3	21	Actb	0.323907	0.0816504
3	22	Actb	0.402635	0.157455
3	23	Actb	0.532898	0.284795
3	24	Actb	0.727291	0.476265
3	25	Actb	0.988956	0.735007
3	26	Actb	1.29345	1.03658
3	27	Actb	1.60312	1.34333
3	28	Actb	1.89547	1.63275
3	29	Actb	2.15577	1.89013
3	30	Actb	2.38125	2.11269
3	31	Actb	2.57343	2.30195
3	32	Actb	2.72908	2.45467
3	33	Actb	2.85417	2.57683
3	34	Actb	2.94664	2.66639
3	35	Actb	3.01427	2.7311
3	36	Actb	3.06012	2.77402
3	37	Actb	3.08934	2.80032
3	38	Actb	3.1108	2.81885
3	39	Actb	3.12621	2.83134
3	40	Actb	3.14194	2.84415
4	1	Actb	1.33974	-0.592122
4	2	Actb	1.67932	-0.318631
4	3	Actb	1.95785	-0.106184
4	4	Actb	2.00835	-0.121763
4	5	Actb	2.23116	0.0349589
4	6	Actb	2.33511	0.0728271
4	7	Actb	2.4696	0.14123
4	8	Actb	2.39284	-0.00161114
4	9	Actb	2.45044	-0.0100937
4	10	Actb	2.58276	0.0561404
4	11	Actb	2.63679	0.0440818
4	12	Actb	2.60449	-0.0543046
4	13	Actb	2.68183	-0.0430444
4	14	Actb	2.78698	-0.00398389
4	15	Actb	2.97067	0.11363
4	16	Actb	3.0259	0.10277
4	17	Actb	2.76456	-0.224652
4	18	Actb	2.7825	-0.272792
4	19	Actb	2.96041	-0.160976
4	20	Actb	3.18987	0.00240024
4	21	Actb	2.93182	-0.321727
4	22	Actb	2.82679	-0.492839
4	23	Actb	2.96891	-0.416809
4	24	Actb	2.9765	-0.475302
4	25	Actb	2.82936	-0.688529
4	26	Actb	3.23088	-0.353091
4	27	Actb	3.43604	-0.214019
4	28	Actb	3.47039	-0.245747
4	29	Actb	3.61496	-0.16726
4	30	Actb	3.52037	-0.327936
4	31	Actb	3.63811	-0.276278
4	32	Actb	3.65292	-0.327559
4	33	Actb	3.5414	-0.505159
4	34	Actb	3.52736	-0.58528
4	35	Actb	3.72304	-0.455687
4	36	Actb	3.92819	-0.316627
4	37	Actb	4.06297	-0.247924
4	38	Actb	3.86475	-0.512229
4	39	Actb	3.41988	-1.02319
4	40	Actb	3.27649	-1.23266
5	1	Actb	-2.61305	-0.172403
5	2	Actb	-2.53985	-0.136699
5	3	Actb	-2.34998	0.0156669
5	4	Actb	-2.29571	0.0324356
5	5	Actb	-2.32615	-0.035501
5	6	Actb	-2.16824	0.0849113
5	7	Actb	-1.96366	0.251985
5	8	Actb	-1.95901	0.219135
5	9	Actb	-2.13554	0.00510994
5	10	Actb	-2.23603	-0.132883
5	11	Actb	-2.17371	-0.108063
5	12	Actb	-2.30357	-0.27542
5	13	Actb	-2.19611	-0.205461
5	14	Actb	-2.04676	-0.0936064
5	15	Actb	-1.88248	0.0331741
5	16	Actb	-1.90113	-0.022973
5	17	Actb	-1.94227	-0.101617
5	18	Actb	-1.98816	-0.185003
5	19	Actb	-1.75973	0.00592904
5	20	Actb	-1.46302	0.265138
5	21	Actb	-1.50151	0.189147
5	22	Actb	-1.59394	0.0592158
5	23	Actb	-1.61698	-0.00132048
5	24	Actb	-1.58084	-0.00268031
5	25	Actb	-1.27454	0.266118
5	26	Actb	-1.43823	0.0649343
5	27	Actb	-1.49542	-0.029757
5	28	Actb	-1.27418	0.15398
5	29	Actb	-1.13063	0.260034
5	30	Actb	-1.03037	0.32279
5	31	Actb	-1.03102	0.284642
5	32	Actb	-1.06856	0.209606
5	33	Actb	-0.958364	0.2823
5	34	Actb	-0.741143	0.462021
5	35	Actb	-0.747003	0.418662
5	36	Actb	-0.700307	0.427858
5	37	Actb	-0.786734	0.303933
5	38	Actb	-0.844115	0.209051
5	39	Actb	-0.703857	0.31181
5	40	Actb	-0.675217	0.302951
6	1	Actb	-4.50131	-1.53702
6	2	Actb	-4.08619	-1.26613
6	3	Actb	-3.53466	-0.858842
6	4	Actb	-2.85184	-0.320259
6	5	Actb	-2.32977	0.057575
6	6	Actb	-2.18564	0.0574699
6	7	Actb	-2.13355	-0.0346713
6	8	Actb	-1.69603	0.258615
6	9	Actb	-1.34607	0.464332
6	10	Actb	-1.06491	0.601262
6	11	Actb	-1.11986	0.402074
6	12	Actb	-1.15705	0.220647
6	13	Actb	-1.06161	0.17185
6	14	Actb	-1.14187	-0.0526477
6	15	Actb	-1.08716	-0.142167
6	16	Actb	-0.817904	-0.017149
6	17	Actb	-0.723977	-0.0674575
6	18	Actb	-0.777417	-0.265133
6	19	Actb	-0.843546	-0.475498
6	20	Actb	-0.527612	-0.303799
6	21	Actb	-0.367445	-0.287868
6	22	Actb	-0.481836	-0.546495
6	23	Actb	-0.358136	-0.567031
6	24	Actb	0.0797834	-0.273347
6	25	Actb	0.096759	-0.400607
6	26	Actb	0.0313126	-0.610289
6	27	Actb	0.143092	-0.642744
6	28	Actb	0.324805	-0.605268
6	29	Actb	0.588578	-0.48573
6	30	Actb	0.633897	-0.584647
6	31	Actb	0.666109	-0.696671
6	32	Actb	0.810641	-0.696374
6	33	Actb	0.852675	-0.798576
6	34	Actb	0.841219	-0.954267
6	35	Actb	0.916583	-1.02314
6	36	Actb	1.16778	-0.916174
6	37	Actb	1.17481	-1.05338
6	38	Actb	1.19708	-1.17535
6	39	Actb	1.26751	-1.24915
6	40	Actb	1.31971	-1.34119
7	1
7	2
7	3
7	4
7	5
7	6
7	7
7	8
7	9
7	10
7	11
7	12
7	13
7	14
7	15
7	16
7	17
7	18
7	19
7	20
7	21
7	22
7	23
7	24
7	25
7	26
7	27
7	28
7	29
7	30
7	31
7	32
7	33
7	34
7	35
7	36
7	37
7	38
7	39
7	40
8	1	Actb	0.201211	-0.0208287
8	2	Actb	0.207937	-0.0174233
8	3	Actb	0.220437	-0.0082433
8	4	Actb	0.230392	-0.00160943
8	5	Actb	0.23654	0.00121782
8	6	Actb	0.240788	0.00214502
8	7	Actb	0.24473	0.00276633
8	8	Actb	0.248336	0.00305141
8	9	Actb	0.251918	0.00331292
8	10	Actb	0.254055	0.0021289
8	11	Actb	0.256304	0.00105723
8	12	Actb	0.259508	0.000940675
8	13	Actb	0.261716	-0.000171907
8	14	Actb	0.264007	-0.00120215
8	15	Actb	0.267098	-0.00143151
8	16	Actb	0.269549	-0.00230156
8	17	Actb	0.273511	-0.00166045
8	18	Actb	0.280758	0.00226645
8	19	Actb	0.293917	0.0121045
8	20	Actb	0.316283	0.0311498
8	21	Actb	0.354328	0.0658743
8	22	Actb	0.422605	0.13083
8	23	Actb	0.538886	0.243791
8	24	Actb	0.72418	0.425764
8	25	Actb	0.989127	0.68739
8	26	Actb	1.32092	1.01586
8	27	Actb	1.67748	1.36911
8	28	Actb	2.02103	1.70933
8	29	Actb	2.31793	2.00292
8	30	Actb	2.56945	2.25111
8	31	Actb	2.78426	2.4626
8	32	Actb	2.95982	2.63483
8	33	Actb	3.09465	2.76635
8	34	Actb	3.19242	2.86079
8	35	Actb	3.25502	2.92008
8	36	Actb	3.30676	2.9685
8	37	Actb	3.34056	2.99897
8	38	Actb	3.3668	3.02189
8	39	Actb	3.38488	3.03665
8	40	Actb	3.39994	3.04839
9	1	Actb	0.143819	-0.0152482
9	2	Actb	0.149557	-0.0124831
9	3	Actb	0.159343	-0.00566982
9	4	Actb	0.166752	-0.00123331
9	5	Actb	0.170692	-0.000265695
9	6	Actb	0.174906	0.000975443
9	7	Actb	0.179499	0.00259559
9	8	Actb	0.182684	0.00280858
9	9	Actb	0.185696	0.00284743
9	10	Actb	0.188029	0.00220848
9	11	Actb	0.190186	0.0013927
9	12	Actb	0.192108	0.000341549
9	13	Actb	0.193967	-0.000771667
9	14	Actb	0.196413	-0.0012986
9	15	Actb	0.199047	-0.00163646
9	16	Actb	0.202245	-0.00141154
9	17	Actb	0.205746	-0.000882689
9	18	Actb	0.212396	0.00279458
9	19	Actb	0.224396	0.0118219
9	20	Actb	0.244177	0.0286305
9	21	Actb	0.281307	0.0627879
9	22	Actb	0.346484	0.124992
9	23	Actb	0.455251	0.230787
9	24	Actb	0.626928	0.399491
9	25	Actb	0.866325	0.635915
9	26	Actb	1.16149	0.928106
9	27	Actb	1.47627	1.23992
9	28	Actb	1.77923	1.5399
9	29	Actb	2.05394	1.81164
9	30	Actb	2.29704	2.05176
9	31	Actb	2.49933	2.25109
9	32	Actb	2.6642	2.41298
9	33	Actb	2.80013	2.54594
9	34	Actb	2.90063	2.64346
9	35	Actb	2.97108	2.71095
9	36	Actb	3.02902	2.76591
9	37	Actb	3.07095	2.80487
9	38	Actb	3.10122	2.83216
9	39	Actb	3.12054	2.84851
9	40	Actb	3.13237	2.85737
10	1
10	2
10	3
10	4
10	5
10	6
10	7
10	8
10	9
10	10
10	11
10	12
10	13
10	14
10	15
10	16
10	17
10	18
10	19
10	20
10	21
10	22
10	23
10	24
10	25
10	26
10	27
10	28
10	29
10	30
10	31
10	32
10	33
10	34
10	35
10	36
10	37
10	38
10	39
10	40
11	1
11	2
11	3
11	4
11	5
11	6
11	7
11	8
11	9
11	10
11	11
11	12
11	13
11	14
11	15
11	16
11	17
11	18
11	19
11	20
11	21
11	22
11	23
11	24
11	25
11	26
11	27
11	28
11	29
11	30
11	31
11	32
11	33
11	34
11	35
11	36
11	37
11	38
11	39
11	40
12	1
12	2
12	3
12	4
12	5
12	6
12	7
12	8
12	9
12	10
12	11
12	12
12	13
12	14
12	15
12	16
12	17
12	18
12	19
12	20
12	21
12	22
12	23
12	24
12	25
12	26
12	27
12	28
12	29
12	30
12	31
12	32
12	33
12	34
12	35
12	36
12	37
12	38
12	39
12	40
13	1	Actb	0.144297	-0.0178958
13	2	Actb	0.150571	-0.0145519
13	3	Actb	0.161301	-0.00675106
13	4	Actb	0.169091	-0.00189068
13	5	Actb	0.174539	0.000627855
13	6	Actb	0.179392	0.00255152
13	7	Actb	0.183504	0.00373375
13	8	Actb	0.184865	0.00216553
13	9	Actb	0.187545	0.00191555
13	10	Actb	0.19038	0.00182101
13	11	Actb	0.192301	0.00081286
13	12	Actb	0.195297	0.000879527
13	13	Actb	0.197904	0.000556841
13	14	Actb	0.198403	-0.00187376
13	15	Actb	0.200311	-0.00289502
13	16	Actb	0.204639	-0.00149683
13	17	Actb	0.208908	-0.000157094
13	18	Actb	0.215719	0.00372384
13	19	Actb	0.227197	0.0122725
13	20	Actb	0.248863	0.0310091
13	21	Actb	0.286138	0.0653549
13	22	Actb	0.352026	0.128313
13	23	Actb	0.463279	0.236636
13	24	Actb	0.63902	0.409448
13	25	Actb	0.890092	0.65759
13	26	Actb	1.19995	0.964524
13	27	Actb	1.5292	1.29084
13	28	Actb	1.83739	1.5961
13	29	Actb	2.10272	1.8585
13	30	Actb	2.32855	2.0814
13	31	Actb	2.50535	2.25528
13	32	Actb	2.64705	2.39405
13	33	Actb	2.76034	2.5044
13	34	Actb	2.83875	2.57988
13	35	Actb	2.8907	2.62891
13	36	Actb	2.93241	2.66769
13	37	Actb	2.95356	2.68591
13	38	Actb	2.97501	2.70442
13	39	Actb	2.98766	2.71414
13	40	Actb	2.99063	2.71418
14	1
14	2
14	3
14	4
14	5
14	6
14	7
14	8
14	9
14	10
14	11
14	12
14	13
14	14
14	15
14	16
14	17
14	18
14	19
14	20
14	21
14	22
14	23
14	24
14	25
14	26
14	27
14	28
14	29
14	30
14	31
14	32
14	33
14	34
14	35
14	36
14	37
14	38
14	39
14	40
15	1	Actb	0.150495	-0.0175534
15	2	Actb	0.156404	-0.0146627
15	3	Actb	0.167669	-0.00641685
15	4	Actb	0.17558	-0.00152432
15	5	Actb	0.179829	-0.000294469
15	6	Actb	0.184706	0.00156377
15	7	Actb	0.189027	0.00286681
15	8	Actb	0.192318	0.00313894
15	9	Actb	0.19487	0.00267185
15	10	Actb	0.197541	0.00232475
15	11	Actb	0.199232	0.000996539
15	12	Actb	0.20204	0.000786299
15	13	Actb	0.204301	2.85451e-05
15	14	Actb	0.206291	-0.000999918
15	15	Actb	0.208459	-0.00185058
15	16	Actb	0.211422	-0.00190636
15	17	Actb	0.214962	-0.00138501
15	18	Actb	0.222479	0.00311246
15	19	Actb	0.234016	0.0116311
15	20	Actb	0.253174	0.0277704
15	21	Actb	0.288068	0.0596462
15	22	Actb	0.350732	0.119291
15	23	Actb	0.460529	0.226069
15	24	Actb	0.634963	0.397485
15	25	Actb	0.890517	0.65002
15	26	Actb	1.21271	0.969196
15	27	Actb	1.5601	1.31357
15	28	Actb	1.89695	1.6474
15	29	Actb	2.20086	1.94829
15	30	Actb	2.46367	2.20808
15	31	Actb	2.69707	2.43846
15	32	Actb	2.89292	2.63129
15	33	Actb	3.06221	2.79757
15	34	Actb	3.20086	2.93319
15	35	Actb	3.31574	3.04506
15	36	Actb	3.41136	3.13765
15	37	Actb	3.50034	3.22362
15	38	Actb	3.56937	3.28963
15	39	Actb	3.63071	3.34795
15	40	Actb	3.67388	3.3881
16	1	Actb	0.165411	-0.0175826
16	2	Actb	0.171889	-0.0144934
16	3	Actb	0.182986	-0.00678442
16	4	Actb	0.192395	-0.000763334
16	5	Actb	0.197366	0.000819252
16	6	Actb	0.202729	0.00279387
16	7	Actb	0.20626	0.00293665
16	8	Actb	0.208971	0.00226022
16	9	Actb	0.212072	0.00197253
16	10	Actb	0.215245	0.00175699
16	11	Actb	0.216929	5.33372e-05
16	12	Actb	0.219502	-0.000762255
16	13	Actb	0.223171	-0.000481568
16	14	Actb	0.225701	-0.00133932
16	15	Actb	0.22888	-0.00154858
16	16	Actb	0.232903	-0.000913379
16	17	Actb	0.239827	0.002622
16	18	Actb	0.25145	0.0108568
16	19	Actb	0.274239	0.0302577
16	20	Actb	0.313844	0.0664747
16	21	Actb	0.385828	0.13507
16	22	Actb	0.510878	0.256732
16	23	Actb	0.714406	0.456872
16	24	Actb	1.01432	0.753393
16	25	Actb	1.40403	1.13972
16	26	Actb	1.82345	1.55576
16	27	Actb	2.21427	1.94319
16	28	Actb	2.55458	2.28011
16	29	Actb	2.84113	2.56326
16	30	Actb	3.08317	2.80192
16	31	Actb	3.28362	2.99898
16	32	Actb	3.45346	3.16544
16	33	Actb	3.59922	3.30781
16	34	Actb	3.71023	3.41543
16	35	Actb	3.79718	3.49899
16	36	Actb	3.88023	3.57865
16	37	Actb	3.94933	3.64436
16	38	Actb	3.99996	3.69161
16	39	Actb	4.04634	3.73459
16	40	Actb	4.07879	3.76366
17	1	Actb	0.168534	-0.0217249
17	2	Actb	0.174584	-0.0191169
17	3	Actb	0.187208	-0.00993593
17	4	Actb	0.201056	0.000470205
17	5	Actb	0.205065	0.0010361
17	6	Actb	0.209847	0.00237506
17	7	Actb	0.214405	0.00349066
17	8	Actb	0.217951	0.00359445
17	9	Actb	0.221042	0.00324327
17	10	Actb	0.222687	0.00144525
17	11	Actb	0.22517	0.000485924
17	12	Actb	0.228428	0.000301178
17	13	Actb	0.2315	-7.00276e-05
17	14	Actb	0.232944	-0.00206771
17	15	Actb	0.235997	-0.0024579
17	16	Actb	0.239987	-0.00191054
17	17	Actb	0.247076	0.00173652
17	18	Actb	0.25912	0.0103374
17	19	Actb	0.279054	0.0268291
17	20	Actb	0.316511	0.0608434
17	21	Actb	0.382645	0.123534
17	22	Actb	0.50019	0.237637
17	23	Actb	0.695099	0.429103
17	24	Actb	0.990324	0.720886
17	25	Actb	1.37953	1.10664
17	26	Actb	1.81788	1.54156
17	27	Actb	2.2302	1.95043
17	28	Actb	2.58632	2.30312
17	29	Actb	2.88129	2.59464
17	30	Actb	3.14072	2.85063
17	31	Actb	3.34936	3.05582
17	32	Actb	3.52541	3.22843
17	33	Actb	3.67627	3.37585
17	34	Actb	3.7982	3.49434
17	35	Actb	3.89442	3.58711
17	36	Actb	3.98141	3.67066
17	37	Actb	4.04786	3.73367
17	38	Actb	4.10456	3.78692
17	39	Actb	4.14113	3.82006
17	40	Actb	4.17659	3.85207
18	1
18	2
18	3
18	4
18	5
18	6
18	7
18	8
18	9
18	10
18	11
18	12
18	13
18	14
18	15
18	16
18	17
18	18
18	19
18	20
18	21
18	22
18	23
18	24
18	25
18	26
18	27
18	28
18	29
18	30
18	31
18	32
18	33
18	34
18	35
18	36
18	37
18	38
18	39
18	40
19	1
19	2
19	3
19	4
19	5
19	6
19	7
19	8
19	9
19	10
19	11
19	12
19	13
19	14
19	15
19	16
19	17
19	18
19	19
19	20
19	21
19	22
19	23
19	24
19	25
19	26
19	27
19	28
19	29
19	30
19	31
19	32
19	33
19	34
19	35
19	36
19	37
19	38
19	39
19	40
20	1	Actb	0.204952	-0.0202436
20	2	Actb	0.212783	-0.0162642
20	3	Actb	0.226142	-0.00675755
20	4	Actb	0.235054	-0.00169728
20	5	Actb	0.241668	0.00106519
20	6	Actb	0.246586	0.00213059
20	7	Actb	0.251896	0.00358922
20	8	Actb	0.255583	0.00342392
20	9	Actb	0.258573	0.00256267
20	10	Actb	0.260759	0.000896589
20	11	Actb	0.264091	0.000376821
20	12	Actb	0.267086	-0.000480817
20	13	Actb	0.271187	-0.000230821
20	14	Actb	0.273022	-0.00224819
20	15	Actb	0.27653	-0.00259209
20	16	Actb	0.282936	-3.82577e-05
20	17	Actb	0.291845	0.00501903
20	18	Actb	0.305822	0.0151447
20	19	Actb	0.330653	0.0361235
20	20	Actb	0.378727	0.0803456
20	21	Actb	0.464078	0.161845
20	22	Actb	0.611475	0.30539
20	23	Actb	0.84393	0.533993
20	24	Actb	1.17859	0.864797
20	25	Actb	1.59338	1.27574
20	26	Actb	2.02297	1.70148
20	27	Actb	2.40789	2.08255
20	28	Actb	2.73694	2.40774
20	29	Actb	3.00927	2.67623
20	30	Actb	3.23651	2.89961
20	31	Actb	3.42496	3.08421
20	32	Actb	3.58327	3.23867
20	33	Actb	3.71747	3.36902
20	34	Actb	3.82551	3.4732
20	35	Actb	3.92077	3.56461
20	36	Actb	3.98786	3.62785
20	37	Actb	4.04804	3.68417
20	38	Actb	4.10326	3.73555
20	39	Actb	4.14612	3.77455
20	40	Actb	4.184	3.80858
21	1	Actb	0.172879	-0.0169676
21	2	Actb	0.179301	-0.0139535
21	3	Actb	0.190789	-0.00587388
21	4	Actb	0.198774	-0.0012966
21	5	Actb	0.204389	0.000910517
21	6	Actb	0.208672	0.00178534
21	7	Actb	0.213372	0.0030774
21	8	Actb	0.217152	0.00344973
21	9	Actb	0.219726	0.00261644
21	10	Actb	0.221176	0.000658209
21	11	Actb	0.224435	0.000508857
21	12	Actb	0.226052	-0.00128171
21	13	Actb	0.228899	-0.001842
21	14	Actb	0.232323	-0.00182603
21	15	Actb	0.23581	-0.00174755
21	16	Actb	0.241826	0.000861284
21	17	Actb	0.249488	0.00511503
21	18	Actb	0.263433	0.0156522
21	19	Actb	0.289765	0.038576
21	20	Actb	0.337946	0.0833495
21	21	Actb	0.424905	0.166901
21	22	Actb	0.574243	0.31283
21	23	Actb	0.816556	0.551736
21	24	Actb	1.17378	0.905548
21	25	Actb	1.62481	1.35318
21	26	Actb	2.09888	1.82384
21	27	Actb	2.52679	2.24834
21	28	Actb	2.88682	2.60496
21	29	Actb	3.18231	2.89704
21	30	Actb	3.43865	3.14998
21	31	Actb	3.64672	3.35464
21	32	Actb	3.82257	3.52708
21	33	Actb	3.96253	3.66363
21	34	Actb	4.06401	3.76171
21	35	Actb	4.17156	3.86585
21	36	Actb	4.2579	3.94878
21	37	Actb	4.31126	3.99873
21	38	Actb	4.36748	4.05155
21	39	Actb	4.41098	4.09164
21	40	Actb	4.44464	4.12188
22	1	Actb	0.164008	-0.0167453
22	2	Actb	0.170416	-0.0134659
22	3	Actb	0.180714	-0.00629621
22	4	Actb	0.189279	-0.000858749
22	5	Actb	0.194151	0.000884908
22	6	Actb	0.199156	0.00276192
22	7	Actb	0.202037	0.00251406
22	8	Actb	0.205505	0.0028536
22	9	Actb	0.20765	0.00187067
22	10	Actb	0.210145	0.00123763
22	11	Actb	0.212586	0.000549646
22	12	Actb	0.21478	-0.000384064
22	13	Actb	0.216621	-0.00167135
22	14	Actb	0.219021	-0.00239996
22	15	Actb	0.223035	-0.00151364
22	16	Actb	0.227071	-0.000606072
22	17	Actb	0.231863	0.00105761
22	18	Actb	0.238892	0.00495806
22	19	Actb	0.253146	0.0160841
22	20	Actb	0.279974	0.039784
22	21	Actb	0.328177	0.0848584
22	22	Actb	0.413853	0.167406
22	23	Actb	0.560263	0.310688
22	24	Actb	0.79334	0.540637
22	25	Actb	1.12808	0.872248
22	26	Actb	1.54242	1.28346
22	27	Actb	1.97411	1.71203
22	28	Actb	2.36129	2.09608
22	29	Actb	2.69524	2.4269
22	30	Actb	2.98101	2.70953
22	31	Actb	3.21728	2.94267
22	32	Actb	3.40899	3.13126
22	33	Actb	3.57819	3.29733
22	34	Actb	3.71023	3.42625
22	35	Actb	3.8235	3.53639
22	36	Actb	3.92306	3.63282
22	37	Actb	3.99454	3.70117
22	38	Actb	4.06456	3.76806
22	39	Actb	4.12227	3.82264
22	40	Actb	4.15938	3.85662
23	1	Actb	0.178734	-0.0163315
23	2	Actb	0.185434	-0.013135
23	3	Actb	0.196667	-0.00540672
23	4	Actb	0.203757	-0.00181976
23	5	Actb	0.209422	0.000341294
23	6	Actb	0.21472	0.00213548
23	7	Actb	0.218519	0.00243013
23	8	Actb	0.221636	0.00204354
23	9	Actb	0.225334	0.00223732
23	10	Actb	0.229101	0.00250072
23	11	Actb	0.232049	0.00194436
23	12	Actb	0.232495	-0.00111276
23	13	Actb	0.236312	-0.000799987
23	14	Actb	0.239705	-0.000910958
23	15	Actb	0.241726	-0.00239389
23	16	Actb	0.24591	-0.00171343
23	17	Actb	0.251652	0.000524659
23	18	Actb	0.261192	0.00656082
23	19	Actb	0.27971	0.0215751
23	20	Actb	0.312477	0.0508379
23	21	Actb	0.369632	0.104489
23	22	Actb	0.473323	0.204676
23	23	Actb	0.64328	0.371129
23	24	Actb	0.901073	0.625419
23	25	Actb	1.25485	0.97569
23	26	Actb	1.66231	1.37965
23	27	Actb	2.05389	1.76772
23	28	Actb	2.39406	2.10439
23	29	Actb	2.67558	2.38241
23	30	Actb	2.91373	2.61706
23	31	Actb	3.10975	2.80956
23	32	Actb	3.28157	2.97789
23	33	Actb	3.4214	3.11421
23	34	Actb	3.53155	3.22086
23	35	Actb	3.6198	3.3056
23	36	Actb	3.69492	3.37722
23	37	Actb	3.75351	3.43231
23	38	Actb	3.80996	3.48525
23	39	Actb	3.86019	3.53198
23	40	Actb	3.89279	3.56107
24	1	Actb	0.21169	-0.0161908
24	2	Actb	0.218641	-0.012785
24	3	Actb	0.229833	-0.00513705
24	4	Actb	0.236221	-0.00229445
24	5	Actb	0.243015	0.000955715
24	6	Actb	0.248439	0.00283461
24	7	Actb	0.250077	0.000927453
24	8	Actb	0.255146	0.00245261
24	9	Actb	0.258719	0.00248017
24	10	Actb	0.262102	0.00231843
24	11	Actb	0.263514	0.000186131
24	12	Actb	0.267126	0.000253807
24	13	Actb	0.26987	-0.000546688
24	14	Actb	0.273049	-0.000912963
24	15	Actb	0.275243	-0.00226367
24	16	Actb	0.279797	-0.00125412
24	17	Actb	0.286542	0.00194626
24	18	Actb	0.297643	0.00950257
24	19	Actb	0.313355	0.0216696
24	20	Actb	0.342755	0.047525
24	21	Actb	0.395371	0.0965964
24	22	Actb	0.488896	0.186576
24	23	Actb	0.645392	0.339528
24	24	Actb	0.880425	0.571017
24	25	Actb	1.18789	0.874936
24	26	Actb	1.54237	1.22587
24	27	Actb	1.8879	1.56786
24	28	Actb	2.20723	1.88364
24	29	Actb	2.48983	2.1627
24	30	Actb	2.73941	2.40873
24	31	Actb	2.94701	2.61278
24	32	Actb	3.12602	2.78825
24	33	Actb	3.27783	2.93652
24	34	Actb	3.40322	3.05837
24	35	Actb	3.50316	3.15476
24	36	Actb	3.59617	3.24423
24	37	Actb	3.67377	3.31828
24	38	Actb	3.73817	3.37914
24	39	Actb	3.79619	3.43361
24	40	Actb	3.84394	3.47782
25	1	Gadph	0.362188	-0.016331
25	2	Gadph	0.375283	-0.0183361
25	3	Gadph	0.400963	-0.00775699
25	4	Gadph	0.421354	-0.00246607
25	5	Gadph	0.43944	0.000519735
25	6	Gadph	0.456714	0.00269303
25	7	Gadph	0.474624	0.00550288
25	8	Gadph	0.489758	0.00553694
25	9	Gadph	0.501499	0.00217708
25	10	Gadph	0.516203	0.00178065
25	11	Gadph	0.530489	0.000966685
25	12	Gadph	0.542492	-0.00213073
25	13	Gadph	0.555621	-0.00410192
25	14	Gadph	0.571581	-0.00324219
25	15	Gadph	0.590445	0.000520886
25	16	Gadph	0.614692	0.00966757
25	17	Gadph	0.653033	0.0329087
25	18	Gadph	0.717346	0.0821211
25	19	Gadph	0.825482	0.175156
25	20	Gadph	1.00344	0.338016
25	21	Gadph	1.2702	0.589675
25	22	Gadph	1.62441	0.928788
25	23	Gadph	2.03076	1.32004
25	24	Gadph	2.43645	1.71062
25	25	Gadph	2.79698	2.05605
25	26	Gadph	3.10587	2.34984
25	27	Gadph	3.36633	2.5952
25	28	Gadph	3.58484	2.79861
25	29	Gadph	3.7577	2.95637
25	30	Gadph	3.89706	3.08063
25	31	Gadph	4.01703	3.1855
25	32	Gadph	4.12041	3.27377
25	33	Gadph	4.21278	3.35105
25	34	Gadph	4.28243	3.4056
25	35	Gadph	4.34122	3.44929
25	36	Gadph	4.40164	3.49461
25	37	Gadph	4.44326	3.52112
25	38	Gadph	4.47798	3.54074
25	39	Gadph	4.50967	3.55733
25	40	Gadph	4.52595	3.55852
26	1	Gadph	0.626197	-0.0174269
26	2	Gadph	0.644744	-0.0625044
26	3	Gadph	0.721767	-0.0491057
26	4	Gadph	0.812811	-0.0216852
26	5	Gadph	0.900326	0.00220524
26	6	Gadph	0.979925	0.0181796
26	7	Gadph	1.04904	0.023674
26	8	Gadph	1.11404	0.0250464
26	9	Gadph	1.1776	0.0249782
26	10	Gadph	1.23731	0.0210632
26	11	Gadph	1.29374	0.0138767
26	12	Gadph	1.34503	0.00154125
26	13	Gadph	1.39744	-0.00967716
26	14	Gadph	1.4522	-0.0185421
26	15	Gadph	1.50281	-0.0315544
26	16	Gadph	1.56273	-0.0352554
26	17	Gadph	1.65066	-0.0109523
26	18	Gadph	1.76771	0.0424745
26	19	Gadph	1.94223	0.153369
26	20	Gadph	2.19693	0.344439
26	21	Gadph	2.56391	0.647796
26	22	Gadph	3.00251	1.02278
26	23	Gadph	3.47768	1.43432
26	24	Gadph	3.91581	1.80883
26	25	Gadph	4.30335	2.13274
26	26	Gadph	4.60708	2.37285
26	27	Gadph	4.85682	2.55897
26	28	Gadph	5.07811	2.71663
26	29	Gadph	5.25029	2.82518
26	30	Gadph	5.3991	2.91037
26	31	Gadph	5.52856	2.97621
26	32	Gadph	5.64011	3.02413
26	33	Gadph	5.72121	3.04161
26	34	Gadph	5.79089	3.04766
26	35	Gadph	5.83327	3.02642
26	36	Gadph	5.87176	3.00129
26	37	Gadph	5.92127	2.98717
26	38	Gadph	5.93207	2.93435
26	39	Gadph	5.92927	2.86792
26	40	Gadph	5.94855	2.82358
27	1
27	2
27	3
27	4
27	5
27	6
27	7
27	8
27	9
27	10
27	11
27	12
27	13
27	14
27	15
27	16
27	17
27	18
27	19
27	20
27	21
27	22
27	23
27	24
27	25
27	26
27	27
27	28
27	29
27	30
27	31
27	32
27	33
27	34
27	35
27	36
27	37
27	38
27	39
27	40
28	1	Gadph	-1.4997	-0.263353
28	2	Gadph	-1.3164	-0.132372
28	3	Gadph	-1.18516	-0.053457
28	4	Gadph	-0.958553	0.12083
28	5	Gadph	-0.846078	0.180982
28	6	Gadph	-0.87801	0.0967263
28	7	Gadph	-0.805628	0.116785
28	8	Gadph	-0.789739	0.0803516
28	9	Gadph	-0.903473	-0.085705
28	10	Gadph	-0.938035	-0.17259
28	11	Gadph	-0.771754	-0.0586317
28	12	Gadph	-0.664588	-0.00378889
28	13	Gadph	-0.72124	-0.112764
28	14	Gadph	-0.564623	-0.00846979
28	15	Gadph	-0.394437	0.109394
28	16	Gadph	-0.395527	0.0559813
28	17	Gadph	-0.4569	-0.0577147
28	18	Gadph	-0.588117	-0.241255
28	19	Gadph	-0.59612	-0.301581
28	20	Gadph	-0.424464	-0.182247
28	21	Gadph	-0.216566	-0.0266724
28	22	Gadph	-0.228875	-0.0913043
28	23	Gadph	-0.0483584	0.0368894
28	24	Gadph	0.0181732	0.0510981
28	25	Gadph	0.22351	0.204112
28	26	Gadph	0.27659	0.204869
28	27	Gadph	0.262204	0.138161
28	28	Gadph	0.269671	0.0933048
28	29	Gadph	0.483394	0.254705
28	30	Gadph	0.62564	0.344628
28	31	Gadph	0.825896	0.492561
28	32	Gadph	0.846379	0.460721
28	33	Gadph	0.789381	0.3514
28	34	Gadph	0.954033	0.46373
28	35	Gadph	0.971812	0.429185
28	36	Gadph	1.11535	0.520401
28	37	Gadph	1.13993	0.492657
28	38	Gadph	1.18521	0.485618
28	39	Gadph	1.21374	0.46182
28	40	Gadph	1.16836	0.364124
29	1	Gadph	-0.103374	-0.997244
29	2	Gadph	0.193265	-0.760966
29	3	Gadph	0.590666	-0.423926
29	4	Gadph	0.920578	-0.154373
29	5	Gadph	1.07596	-0.0593519
29	6	Gadph	1.12254	-0.0731377
29	7	Gadph	1.24195	-0.0140842
29	8	Gadph	1.38552	0.0691253
29	9	Gadph	1.46863	0.0918746
29	10	Gadph	1.72394	0.286825
29	11	Gadph	1.61846	0.120987
29	12	Gadph	1.56998	0.0121402
29	13	Gadph	1.57919	-0.03901
29	14	Gadph	1.91995	0.241398
29	15	Gadph	1.80069	0.0617682
29	16	Gadph	1.75746	-0.0418194
29	17	Gadph	2.36382	0.504182
29	18	Gadph	2.35119	0.43119
29	19	Gadph	1.97592	-0.0044358
29	20	Gadph	1.77804	-0.262681
29	21	Gadph	1.99067	-0.110409
29	22	Gadph	2.01885	-0.142586
29	23	Gadph	2.04377	-0.178031
29	24	Gadph	1.96652	-0.315646
29	25	Gadph	2.01462	-0.327904
29	26	Gadph	2.31408	-0.0888005
29	27	Gadph	2.77041	0.307166
29	28	Gadph	2.73629	0.212689
29	29	Gadph	2.70245	0.118491
29	30	Gadph	3.04038	0.396061
29	31	Gadph	3.14313	0.438448
29	32	Gadph	2.92487	0.159827
29	33	Gadph	2.96428	0.138873
29	34	Gadph	2.95348	0.0677177
29	35	Gadph	2.88791	-0.0582153
29	36	Gadph	3.04132	0.034834
29	37	Gadph	2.8993	-0.167551
29	38	Gadph	3.1098	-0.0174038
29	39	Gadph	3.32489	0.137324
29	40	Gadph	3.45144	0.20351
30	1	Gadph	-1.50981	-0.561599
30	2	Gadph	-1.52477	-0.643573
30	3	Gadph	-1.22203	-0.407853
30	4	Gadph	-1.01851	-0.271361
30	5	Gadph	-0.799026	-0.118894
30	6	Gadph	-0.539614	0.0734985
30	7	Gadph	-0.354382	0.19171
30	8	Gadph	-0.270537	0.208533
30	9	Gadph	-0.300497	0.111553
30	10	Gadph	-0.123741	0.221288
30	11	Gadph	-0.144422	0.133587
30	12	Gadph	-0.107894	0.103094
30	13	Gadph	0.0952404	0.239207
30	14	Gadph	0.0319061	0.108853
30	15	Gadph	-0.0111317	-0.001206
30	16	Gadph	-0.0788173	-0.135912
30	17	Gadph	0.0242767	-0.0998389
30	18	Gadph	0.0855441	-0.105592
30	19	Gadph	0.195504	-0.0626532
30	20	Gadph	0.28826	-0.0369179
30	21	Gadph	0.272549	-0.11965
30	22	Gadph	0.442486	-0.0167327
30	23	Gadph	0.588204	0.061964
30	24	Gadph	0.606199	0.0129387
30	25	Gadph	0.570666	-0.0896154
30	26	Gadph	0.642908	-0.0843942
30	27	Gadph	0.894243	0.0999203
30	28	Gadph	1.00865	0.147302
30	29	Gadph	1.13118	0.20282
30	30	Gadph	1.19974	0.204353
30	31	Gadph	1.25821	0.195804
30	32	Gadph	1.24441	0.114982
30	33	Gadph	1.42255	0.226104
30	34	Gadph	1.38872	0.125256
30	35	Gadph	1.44362	0.113127
30	36	Gadph	1.6604	0.262888
30	37	Gadph	1.71181	0.247285
30	38	Gadph	1.71447	0.182915
30	39	Gadph	1.7682	0.169624
30	40	Gadph	1.61495	-0.0506391
31	1	Gadph	0.193817	-0.0151776
31	2	Gadph	0.201608	-0.0119909
31	3	Gadph	0.213775	-0.00442772
31	4	Gadph	0.222275	-0.000531738
31	5	Gadph	0.229396	0.00198446
31	6	Gadph	0.23486	0.00284441
31	7	Gadph	0.238264	0.00164476
31	8	Gadph	0.242358	0.00113447
31	9	Gadph	0.247155	0.00132707
31	10	Gadph	0.249523	-0.000909009
31	11	Gadph	0.254038	-0.00099758
31	12	Gadph	0.258253	-0.00138706
31	13	Gadph	0.262099	-0.00214568
31	14	Gadph	0.270312	0.00146362
31	15	Gadph	0.281376	0.00792396
31	16	Gadph	0.302054	0.0239975
31	17	Gadph	0.339909	0.057248
31	18	Gadph	0.410678	0.123413
31	19	Gadph	0.535141	0.243272
31	20	Gadph	0.743799	0.447325
31	21	Gadph	1.06273	0.761649
31	22	Gadph	1.48255	1.17687
31	23	Gadph	1.96349	1.6532
31	24	Gadph	2.44387	2.12898
31	25	Gadph	2.86792	2.54842
31	26	Gadph	3.22851	2.90441
31	27	Gadph	3.53618	3.20748
31	28	Gadph	3.79838	3.46507
31	29	Gadph	4.01105	3.67314
31	30	Gadph	4.19073	3.84822
31	31	Gadph	4.34297	3.99585
31	32	Gadph	4.46829	4.11657
31	33	Gadph	4.57841	4.22208
31	34	Gadph	4.66725	4.30632
31	35	Gadph	4.74145	4.37591
31	36	Gadph	4.80352	4.43338
31	37	Gadph	4.85849	4.48375
31	38	Gadph	4.90694	4.52759
31	39	Gadph	4.94851	4.56456
31	40	Gadph	4.97352	4.58496
32	1	Gadph	0.214147	-0.0132102
32	2	Gadph	0.221065	-0.0110064
32	3	Gadph	0.232686	-0.00410057
32	4	Gadph	0.240055	-0.00144566
32	5	Gadph	0.247281	0.00106509
32	6	Gadph	0.254564	0.00363356
32	7	Gadph	0.258043	0.00239826
32	8	Gadph	0.263394	0.0030344
32	9	Gadph	0.265889	0.000814521
32	10	Gadph	0.269093	-0.000695854
32	11	Gadph	0.271835	-0.00266861
32	12	Gadph	0.276198	-0.00302027
32	13	Gadph	0.282604	-0.00132845
32	14	Gadph	0.290961	0.00231358
32	15	Gadph	0.303869	0.0105073
32	16	Gadph	0.326244	0.0281675
32	17	Gadph	0.368001	0.0652094
32	18	Gadph	0.445032	0.137526
32	19	Gadph	0.583642	0.271421
32	20	Gadph	0.815857	0.498922
32	21	Gadph	1.16734	0.845693
32	22	Gadph	1.6318	1.30544
32	23	Gadph	2.14975	1.81867
32	24	Gadph	2.64879	2.313
32	25	Gadph	3.09695	2.75644
32	26	Gadph	3.47236	3.12713
32	27	Gadph	3.77562	3.42568
32	28	Gadph	4.02061	3.66595
32	29	Gadph	4.22574	3.86637
32	30	Gadph	4.3871	4.02302
32	31	Gadph	4.52139	4.1526
32	32	Gadph	4.64254	4.26903
32	33	Gadph	4.73759	4.35936
32	34	Gadph	4.80772	4.42478
32	35	Gadph	4.88303	4.49537
32	36	Gadph	4.93903	4.54666
32	37	Gadph	4.97634	4.57925
32	38	Gadph	5.01079	4.60899
32	39	Gadph	5.04383	4.63732
32	40	Gadph	5.07326	4.66203
33	1	Gadph	0.203599	-0.0163168
33	2	Gadph	0.210566	-0.0138215
33	3	Gadph	0.224029	-0.00483065
33	4	Gadph	0.233256	-7.51084e-05
33	5	Gadph	0.239316	0.00151263
33	6	Gadph	0.244509	0.00223357
33	7	Gadph	0.249468	0.00272139
33	8	Gadph	0.253275	0.00205586
33	9	Gadph	0.256453	0.000762761
33	10	Gadph	0.259023	-0.00113941
33	11	Gadph	0.262855	-0.00177895
33	12	Gadph	0.26767	-0.00143606
33	13	Gadph	0.273552	-2.60296e-05
33	14	Gadph	0.281972	0.00392199
33	15	Gadph	0.295257	0.0127353
33	16	Gadph	0.320226	0.0332325
33	17	Gadph	0.364025	0.0725595
33	18	Gadph	0.444704	0.148767
33	19	Gadph	0.591056	0.290647
33	20	Gadph	0.8366	0.531719
33	21	Gadph	1.20443	0.89508
33	22	Gadph	1.69015	1.37633
33	23	Gadph	2.22556	1.90727
33	24	Gadph	2.7386	2.41583
33	25	Gadph	3.18575	2.85851
33	26	Gadph	3.55747	3.22576
33	27	Gadph	3.865	3.52882
33	28	Gadph	4.11827	3.77761
33	29	Gadph	4.33267	3.98754
33	30	Gadph	4.49913	4.14953
33	31	Gadph	4.62587	4.2718
33	32	Gadph	4.73548	4.37694
33	33	Gadph	4.83904	4.47602
33	34	Gadph	4.92488	4.5574
33	35	Gadph	4.98725	4.61529
33	36	Gadph	5.04481	4.66838
33	37	Gadph	5.08384	4.70293
33	38	Gadph	5.11513	4.72975
33	39	Gadph	5.14492	4.75508
33	40	Gadph	5.16799	4.77368
34	1
34	2
34	3
34	4
34	5
34	6
34	7
34	8
34	9
34	10
34	11
34	12
34	13
34	14
34	15
34	16
34	17
34	18
34	19
34	20
34	21
34	22
34	23
34	24
34	25
34	26
34	27
34	28
34	29
34	30
34	31
34	32
34	33
34	34
34	35
34	36
34	37
34	38
34	39
34	40
35	1
35	2
35	3
35	4
35	5
35	6
35	7
35	8
35	9
35	10
35	11
35	12
35	13
35	14
35	15
35	16
35	17
35	18
35	19
35	20
35	21
35	22
35	23
35	24
35	25
35	26
35	27
35	28
35	29
35	30
35	31
35	32
35	33
35	34
35	35
35	36
35	37
35	38
35	39
35	40
36	1
36	2
36	3
36	4
36	5
36	6
36	7
36	8
36	9
36	10
36	11
36	12
36	13
36	14
36	15
36	16
36	17
36	18
36	19
36	20
36	21
36	22
36	23
36	24
36	25
36	26
36	27
36	28
36	29
36	30
36	31
36	32
36	33
36	34
36	35
36	36
36	37
36	38
36	39
36	40
37	1	Gadph	0.200726	-0.0169972
37	2	Gadph	0.207551	-0.0144178
37	3	Gadph	0.219453	-0.0067606
37	4	Gadph	0.228733	-0.00172601
37	5	Gadph	0.23738	0.00267596
37	6	Gadph	0.242587	0.00363773
37	7	Gadph	0.24648	0.00328564
37	8	Gadph	0.250512	0.00307189
37	9	Gadph	0.2533	0.00161473
37	10	Gadph	0.255201	-0.000730097
37	11	Gadph	0.259043	-0.00113267
37	12	Gadph	0.262932	-0.00148912
37	13	Gadph	0.2669	-0.00176659
37	14	Gadph	0.272231	-0.000680865
37	15	Gadph	0.282873	0.00571629
37	16	Gadph	0.301873	0.0204705
37	17	Gadph	0.333413	0.0477648
37	18	Gadph	0.393673	0.10378
37	19	Gadph	0.501254	0.207116
37	20	Gadph	0.688939	0.390556
37	21	Gadph	0.983144	0.680515
37	22	Gadph	1.39396	1.08709
37	23	Gadph	1.88991	1.57879
37	24	Gadph	2.39208	2.07671
37	25	Gadph	2.83391	2.5143
37	26	Gadph	3.21295	2.8891
37	27	Gadph	3.52296	3.19486
37	28	Gadph	3.78789	3.45554
37	29	Gadph	4.00789	3.6713
37	30	Gadph	4.17714	3.8363
37	31	Gadph	4.31563	3.97054
37	32	Gadph	4.42775	4.07843
37	33	Gadph	4.52262	4.16905
37	34	Gadph	4.59698	4.23916
37	35	Gadph	4.66486	4.3028
37	36	Gadph	4.72048	4.35417
37	37	Gadph	4.76625	4.3957
37	38	Gadph	4.79623	4.42144
37	39	Gadph	4.82653	4.44749
37	40	Gadph	4.84425	4.46096
38	1	Gadph	0.201045	-0.0147883
38	2	Gadph	0.207861	-0.0124789
38	3	Gadph	0.220586	-0.00426021
38	4	Gadph	0.228625	-0.000727651
38	5	Gadph	0.233975	0.000115737
38	6	Gadph	0.241258	0.00289332
38	7	Gadph	0.245681	0.00280974
38	8	Gadph	0.249205	0.00182684
38	9	Gadph	0.2534	0.00151578
38	10	Gadph	0.256848	0.000457821
38	11	Gadph	0.259309	-0.00158743
38	12	Gadph	0.263588	-0.0018147
38	13	Gadph	0.268212	-0.00169717
38	14	Gadph	0.274883	0.00046791
38	15	Gadph	0.286581	0.00765959
38	16	Gadph	0.30552	0.0220916
38	17	Gadph	0.342261	0.0543268
38	18	Gadph	0.412214	0.119773
38	19	Gadph	0.534957	0.23801
38	20	Gadph	0.74104	0.439586
38	21	Gadph	1.05661	0.750648
38	22	Gadph	1.48096	1.17049
38	23	Gadph	1.96668	1.65171
38	24	Gadph	2.4445	2.12502
38	25	Gadph	2.85858	2.53459
38	26	Gadph	3.19433	2.86584
38	27	Gadph	3.47801	3.14501
38	28	Gadph	3.71279	3.37529
38	29	Gadph	3.90104	3.55903
38	30	Gadph	4.0587	3.71218
38	31	Gadph	4.18255	3.83153
38	32	Gadph	4.29372	3.9382
38	33	Gadph	4.37414	4.01411
38	34	Gadph	4.43773	4.07319
38	35	Gadph	4.49981	4.13076
38	36	Gadph	4.55042	4.17686
38	37	Gadph	4.58722	4.20916
38	38	Gadph	4.62079	4.23822
38	39	Gadph	4.6475	4.26043
38	40	Gadph	4.65358	4.262
39	1	Gadph	0.218209	-0.0157004
39	2	Gadph	0.225552	-0.0133858
39	3	Gadph	0.238166	-0.00579937
39	4	Gadph	0.247333	-0.00166063
39	5	Gadph	0.255822	0.00179934
39	6	Gadph	0.262345	0.00329441
39	7	Gadph	0.267628	0.0035495
39	8	Gadph	0.271314	0.00220686
39	9	Gadph	0.274831	0.000695626
39	10	Gadph	0.279729	0.000565282
39	11	Gadph	0.283914	-0.000277814
39	12	Gadph	0.287562	-0.00165771
39	13	Gadph	0.29242	-0.00182802
39	14	Gadph	0.298389	-0.000887475
39	15	Gadph	0.30861	0.00430502
39	16	Gadph	0.32623	0.0168968
39	17	Gadph	0.358612	0.044251
39	18	Gadph	0.417802	0.0984128
39	19	Gadph	0.525152	0.200734
39	20	Gadph	0.712231	0.382786
39	21	Gadph	1.0073	0.672822
39	22	Gadph	1.41549	1.07599
39	23	Gadph	1.90552	1.56099
39	24	Gadph	2.40797	2.05841
39	25	Gadph	2.86229	2.50771
39	26	Gadph	3.25851	2.89889
39	27	Gadph	3.59635	3.23171
39	28	Gadph	3.87664	3.50697
39	29	Gadph	4.10388	3.72918
39	30	Gadph	4.2965	3.91677
39	31	Gadph	4.45119	4.06643
39	32	Gadph	4.58024	4.19046
39	33	Gadph	4.69172	4.2969
39	34	Gadph	4.77958	4.37974
39	35	Gadph	4.87048	4.46561
39	36	Gadph	4.94682	4.53692
39	37	Gadph	5.00986	4.59493
39	38	Gadph	5.06155	4.6416
39	39	Gadph	5.10611	4.68113
39	40	Gadph	5.13217	4.70216
40	1	Gadph	0.20605	-0.0129763
40	2	Gadph	0.212492	-0.0113456
40	3	Gadph	0.223788	-0.00486107
40	4	Gadph	0.233675	0.000213717
40	5	Gadph	0.240829	0.0025562
40	6	Gadph	0.24556	0.00247618
40	7	Gadph	0.249193	0.00129739
40	8	Gadph	0.254738	0.0020305
40	9	Gadph	0.257349	-0.000169818
40	10	Gadph	0.262294	-3.64068e-05
40	11	Gadph	0.265088	-0.00205431
40	12	Gadph	0.269679	-0.00227498
40	13	Gadph	0.275728	-0.00103778
40	14	Gadph	0.283438	0.00186037
40	15	Gadph	0.29617	0.00978053
40	16	Gadph	0.320939	0.0297377
40	17	Gadph	0.365344	0.0693311
40	18	Gadph	0.446258	0.145434
40	19	Gadph	0.589472	0.283836
40	20	Gadph	0.82877	0.518322
40	21	Gadph	1.1849	0.869637
40	22	Gadph	1.64814	1.32807
40	23	Gadph	2.15984	1.83496
40	24	Gadph	2.64912	2.31942
40	25	Gadph	3.07333	2.73883
40	26	Gadph	3.43396	3.09464
40	27	Gadph	3.73514	3.39101
40	28	Gadph	3.99234	3.6434
40	29	Gadph	4.19929	3.84553
40	30	Gadph	4.37563	4.01707
40	31	Gadph	4.5132	4.14983
40	32	Gadph	4.63349	4.26531
40	33	Gadph	4.74379	4.37079
40	34	Gadph	4.82483	4.44702
40	35	Gadph	4.91119	4.52857
40	36	Gadph	4.97843	4.591
40	37	Gadph	5.03419	4.64194
40	38	Gadph	5.0812	4.68414
40	39	Gadph	5.12253	4.72066
40	40	Gadph	5.15432	4.74764
41	1	Gadph	0.207106	-0.0128864
41	2	Gadph	0.214513	-0.0100039
41	3	Gadph	0.226137	-0.00290408
41	4	Gadph	0.23301	-0.00055436
41	5	Gadph	0.239358	0.00126903
41	6	Gadph	0.24487	0.00225723
41	7	Gadph	0.24893	0.00179347
41	8	Gadph	0.252999	0.00133895
41	9	Gadph	0.256066	-0.000117847
41	10	Gadph	0.259947	-0.000760896
41	11	Gadph	0.264038	-0.00119414
41	12	Gadph	0.267775	-0.00198122
41	13	Gadph	0.272879	-0.00140103
41	14	Gadph	0.281059	0.00225488
41	15	Gadph	0.293152	0.00982377
41	16	Gadph	0.316131	0.0282788
41	17	Gadph	0.359516	0.06714
41	18	Gadph	0.440174	0.143275
41	19	Gadph	0.583351	0.281928
41	20	Gadph	0.822082	0.516135
41	21	Gadph	1.18401	0.873537
41	22	Gadph	1.65972	1.34472
41	23	Gadph	2.19233	1.87281
41	24	Gadph	2.70939	2.38535
41	25	Gadph	3.1534	2.82483
41	26	Gadph	3.51845	3.18536
41	27	Gadph	3.81985	3.48224
41	28	Gadph	4.06985	3.72771
41	29	Gadph	4.27784	3.93118
41	30	Gadph	4.44733	4.09615
41	31	Gadph	4.58545	4.22974
41	32	Gadph	4.70694	4.3467
41	33	Gadph	4.80907	4.44431
41	34	Gadph	4.89644	4.52716
41	35	Gadph	4.95899	4.58519
41	36	Gadph	5.02236	4.64403
41	37	Gadph	5.07394	4.69109
41	38	Gadph	5.11989	4.73251
41	39	Gadph	5.1629	4.771
41	40	Gadph	5.17692	4.7805
42	1
42	2
42	3
42	4
42	5
42	6
42	7
42	8
42	9
42	10
42	11
42	12
42	13
42	14
42	15
42	16
42	17
42	18
42	19
42	20
42	21
42	22
42	23
42	24
42	25
42	26
42	27
42	28
42	29
42	30
42	31
42	32
42	33
42	34
42	35
42	36
42	37
42	38
42	39
42	40
43	1	Gadph	0.272807	-0.0172039
43	2	Gadph	0.281401	-0.0153212
43	3	Gadph	0.297027	-0.00640563
43	4	Gadph	0.309009	-0.00113421
43	5	Gadph	0.319361	0.00250761
43	6	Gadph	0.327275	0.00371083
43	7	Gadph	0.333351	0.00307596
43	8	Gadph	0.338764	0.00177882
43	9	Gadph	0.344767	0.00107094
43	10	Gadph	0.350784	0.000377539
43	11	Gadph	0.355766	-0.00135128
43	12	Gadph	0.361992	-0.00183625
43	13	Gadph	0.368744	-0.00179434
43	14	Gadph	0.379982	0.00273259
43	15	Gadph	0.39869	0.0147304
43	16	Gadph	0.428959	0.0382885
43	17	Gadph	0.484976	0.0875953
43	18	Gadph	0.58833	0.184238
43	19	Gadph	0.765799	0.354997
43	20	Gadph	1.05451	0.636997
43	21	Gadph	1.4809	1.05668
43	22	Gadph	2.0161	1.58517
43	23	Gadph	2.58391	2.14626
43	24	Gadph	3.1004	2.65604
43	25	Gadph	3.54481	3.09375
43	26	Gadph	3.90691	3.44913
43	27	Gadph	4.19761	3.73313
43	28	Gadph	4.44312	3.97193
43	29	Gadph	4.63745	4.15954
43	30	Gadph	4.78798	4.30336
43	31	Gadph	4.92229	4.43096
43	32	Gadph	5.03357	4.53553
43	33	Gadph	5.1284	4.62365
43	34	Gadph	5.20031	4.68885
43	35	Gadph	5.26498	4.74681
43	36	Gadph	5.32716	4.80228
43	37	Gadph	5.38693	4.85534
43	38	Gadph	5.42624	4.88793
43	39	Gadph	5.45346	4.90844
43	40	Gadph	5.47909	4.92736
44	1	Gadph	0.242375	-0.0139775
44	2	Gadph	0.249693	-0.0119947
44	3	Gadph	0.262031	-0.00499067
44	4	Gadph	0.271982	-0.000374635
44	5	Gadph	0.279743	0.0020512
44	6	Gadph	0.28605	0.00302384
44	7	Gadph	0.290506	0.00214549
44	8	Gadph	0.295256	0.00156087
44	9	Gadph	0.299032	2.04227e-06
44	10	Gadph	0.304477	0.000111996
44	11	Gadph	0.308099	-0.00160067
44	12	Gadph	0.312916	-0.00211815
44	13	Gadph	0.320558	0.000188687
44	14	Gadph	0.330824	0.00512048
44	15	Gadph	0.348494	0.0174559
44	16	Gadph	0.378487	0.0421142
44	17	Gadph	0.437809	0.0961008
44	18	Gadph	0.54303	0.195988
44	19	Gadph	0.726158	0.373781
44	20	Gadph	1.02329	0.665577
44	21	Gadph	1.45274	1.0897
44	22	Gadph	1.98855	1.62017
44	23	Gadph	2.55376	2.18005
44	24	Gadph	3.06368	2.68463
44	25	Gadph	3.47973	3.09534
44	26	Gadph	3.82423	3.43451
44	27	Gadph	4.10337	3.70832
44	28	Gadph	4.33436	3.93398
44	29	Gadph	4.52393	4.1182
44	30	Gadph	4.68335	4.27229
44	31	Gadph	4.81132	4.39492
44	32	Gadph	4.91365	4.49192
44	33	Gadph	4.99644	4.56938
44	34	Gadph	5.07941	4.64701
44	35	Gadph	5.14671	4.70898
44	36	Gadph	5.20042	4.75735
44	37	Gadph	5.25169	4.80329
44	38	Gadph	5.29197	4.83823
44	39	Gadph	5.32172	4.86265
44	40	Gadph	5.35097	4.88656
45	1	Gadph	0.208145	-0.0131597
45	2	Gadph	0.2149	-0.0109365
45	3	Gadph	0.225991	-0.00437757
45	4	Gadph	0.234253	-0.000648052
45	5	Gadph	0.24045	0.0010174
45	6	Gadph	0.24575	0.00178524
45	7	Gadph	0.251245	0.00274819
45	8	Gadph	0.25564	0.00261062
45	9	Gadph	0.258863	0.00130131
45	10	Gadph	0.261293	-0.000800619
45	11	Gadph	0.265845	-0.000780355
45	12	Gadph	0.269345	-0.00181262
45	13	Gadph	0.274646	-0.00104354
45	14	Gadph	0.284491	0.00426926
45	15	Gadph	0.298958	0.0142043
45	16	Gadph	0.324801	0.0355143
45	17	Gadph	0.374923	0.0811043
45	18	Gadph	0.466931	0.16858
45	19	Gadph	0.630047	0.327164
45	20	Gadph	0.899272	0.591857
45	21	Gadph	1.30176	0.989812
45	22	Gadph	1.82911	1.51263
45	23	Gadph	2.40891	2.0879
45	24	Gadph	2.94719	2.62165
45	25	Gadph	3.3941	3.06403
45	26	Gadph	3.76675	3.43214
45	27	Gadph	4.0648	3.72566
45	28	Gadph	4.31442	3.97075
45	29	Gadph	4.51955	4.17135
45	30	Gadph	4.66961	4.31688
45	31	Gadph	4.80779	4.45053
45	32	Gadph	4.92826	4.56646
45	33	Gadph	5.02571	4.65937
45	34	Gadph	5.10524	4.73438
45	35	Gadph	5.16672	4.79133
45	36	Gadph	5.22209	4.84216
45	37	Gadph	5.28164	4.89718
45	38	Gadph	5.33367	4.94468
45	39	Gadph	5.36826	4.97473
45	40	Gadph	5.40198	5.00392
46	1	Gadph	0.207104	-0.012441
46	2	Gadph	0.213522	-0.00993446
46	3	Gadph	0.223837	-0.00353177
46	4	Gadph	0.231247	-3.3164e-05
46	5	Gadph	0.235883	0.000690857
46	6	Gadph	0.241094	0.00198979
46	7	Gadph	0.24405	0.00103347
46	8	Gadph	0.248868	0.00194024
46	9	Gadph	0.252361	0.00152127
46	10	Gadph	0.254774	2.21686e-05
46	11	Gadph	0.256409	-0.00225492
46	12	Gadph	0.261192	-0.00138303
46	13	Gadph	0.266492	5.08671e-06
46	14	Gadph	0.273682	0.00328336
46	15	Gadph	0.287571	0.0132599
46	16	Gadph	0.310418	0.0321954
46	17	Gadph	0.353291	0.0711562
46	18	Gadph	0.43196	0.145914
46	19	Gadph	0.573614	0.283656
46	20	Gadph	0.817502	0.523632
46	21	Gadph	1.19312	0.895334
46	22	Gadph	1.69877	1.39708
46	23	Gadph	2.27407	1.96847
46	24	Gadph	2.834	2.52448
46	25	Gadph	3.3041	2.99067
46	26	Gadph	3.68099	3.36365
46	27	Gadph	3.99908	3.67783
46	28	Gadph	4.25407	3.9289
46	29	Gadph	4.45999	4.13091
46	30	Gadph	4.62088	4.28789
46	31	Gadph	4.7607	4.4238
46	32	Gadph	4.87882	4.53801
46	33	Gadph	4.97936	4.63463
46	34	Gadph	5.06301	4.71437
46	35	Gadph	5.1336	4.78106
46	36	Gadph	5.19533	4.83887
46	37	Gadph	5.24613	4.88576
46	38	Gadph	5.3008	4.93652
46	39	Gadph	5.34306	4.97486
46	40	Gadph	5.37071	4.9986
47	1
47	2
47	3
47	4
47	5
47	6
47	7
47	8
47	9
47	10
47	11
47	12
47	13
47	14
47	15
47	16
47	17
47	18
47	19
47	20
47	21
47	22
47	23
47	24
47	25
47	26
47	27
47	28
47	29
47	30
47	31
47	32
47	33
47	34
47	35
47	36
47	37
47	38
47	39
47	40
48	1	Gadph	0.213953	-0.0120433
48	2	Gadph	0.219432	-0.0107566
48	3	Gadph	0.230607	-0.00377402
48	4	Gadph	0.237707	-0.000866225
48	5	Gadph	0.243763	0.000996986
48	6	Gadph	0.248704	0.00174634
48	7	Gadph	0.25438	0.00322982
48	8	Gadph	0.257014	0.00167183
48	9	Gadph	0.260096	0.00056135
48	10	Gadph	0.264224	0.000497618
48	11	Gadph	0.266539	-0.00138051
48	12	Gadph	0.270019	-0.0020922
48	13	Gadph	0.274426	-0.00187806
48	14	Gadph	0.281783	0.00128708
48	15	Gadph	0.295088	0.0103995
48	16	Gadph	0.317997	0.0291171
48	17	Gadph	0.362401	0.0693288
48	18	Gadph	0.443287	0.146022
48	19	Gadph	0.587152	0.285695
48	20	Gadph	0.827052	0.521402
48	21	Gadph	1.18677	0.87693
48	22	Gadph	1.65728	1.34324
48	23	Gadph	2.18014	1.86191
48	24	Gadph	2.67733	2.35491
48	25	Gadph	3.10509	2.77848
48	26	Gadph	3.45655	3.12575
48	27	Gadph	3.74252	3.40753
48	28	Gadph	3.97013	3.63094
48	29	Gadph	4.15848	3.8151
48	30	Gadph	4.31511	3.96754
48	31	Gadph	4.4382	4.08643
48	32	Gadph	4.52987	4.17391
48	33	Gadph	4.60567	4.24552
48	34	Gadph	4.69056	4.32622
48	35	Gadph	4.77276	4.40423
48	36	Gadph	4.8334	4.46068
48	37	Gadph	4.87708	4.50017
48	38	Gadph	4.90579	4.52468
48	39	Gadph	4.94756	4.56225
48	40	Gadph	4.96898	4.57948
49	1	Sdha	0.176379	-0.0207962
49	2	Sdha	0.183645	-0.0166852
49	3	Sdha	0.196509	-0.00697692
49	4	Sdha	0.205655	-0.000986486
49	5	Sdha	0.212068	0.00227032
49	6	Sdha	0.214669	0.00171618
49	7	Sdha	0.217238	0.00112897
49	8	Sdha	0.221362	0.00209794
49	9	Sdha	0.223882	0.00146169
49	10	Sdha	0.227395	0.00181959
49	11	Sdha	0.230753	0.00202222
49	12	Sdha	0.233426	0.00153919
49	13	Sdha	0.235452	0.000409213
49	14	Sdha	0.236615	-0.00158292
49	15	Sdha	0.239036	-0.00231797
49	16	Sdha	0.242206	-0.00230381
49	17	Sdha	0.247368	-0.000297203
49	18	Sdha	0.25318	0.00235944
49	19	Sdha	0.264156	0.0101795
49	20	Sdha	0.285958	0.0288265
49	21	Sdha	0.323586	0.0632982
49	22	Sdha	0.393705	0.130262
49	23	Sdha	0.517901	0.251302
49	24	Sdha	0.720686	0.450931
49	25	Sdha	1.02059	0.747683
49	26	Sdha	1.40674	1.13067
49	27	Sdha	1.82663	1.5474
49	28	Sdha	2.23001	1.94764
49	29	Sdha	2.58536	2.29983
49	30	Sdha	2.88796	2.59927
49	31	Sdha	3.14753	2.85568
49	32	Sdha	3.3553	3.0603
49	33	Sdha	3.52975	3.23159
49	34	Sdha	3.67604	3.37473
49	35	Sdha	3.79493	3.49047
49	36	Sdha	3.89358	3.58596
49	37	Sdha	3.97327	3.66249
49	38	Sdha	4.03499	3.72106
49	39	Sdha	4.08767	3.77058
49	40	Sdha	4.12309	3.80284
50	1	Sdha	0.165301	-0.017018
50	2	Sdha	0.172107	-0.01329
50	3	Sdha	0.182962	-0.00551308
50	4	Sdha	0.190398	-0.00115482
50	5	Sdha	0.194879	0.000247426
50	6	Sdha	0.199125	0.00141618
50	7	Sdha	0.202681	0.00189376
50	8	Sdha	0.205198	0.00133348
50	9	Sdha	0.209032	0.00208932
50	10	Sdha	0.212514	0.00249362
50	11	Sdha	0.215233	0.00213476
50	12	Sdha	0.217908	0.00173107
50	13	Sdha	0.219248	-6.50759e-06
50	14	Sdha	0.220014	-0.00231844
50	15	Sdha	0.223232	-0.00217839
50	16	Sdha	0.226902	-0.00158605
50	17	Sdha	0.230984	-0.000582342
50	18	Sdha	0.238774	0.00413003
50	19	Sdha	0.253084	0.0153617
50	20	Sdha	0.278879	0.0380786
50	21	Sdha	0.325621	0.0817433
50	22	Sdha	0.409609	0.162653
50	23	Sdha	0.558635	0.308601
50	24	Sdha	0.795392	0.54228
50	25	Sdha	1.13564	0.879454
50	26	Sdha	1.55306	1.2938
50	27	Sdha	1.99094	1.72859
50	28	Sdha	2.39272	2.1273
50	29	Sdha	2.73254	2.46404
50	30	Sdha	3.02242	2.75084
50	31	Sdha	3.25327	2.97862
50	32	Sdha	3.4556	3.17787
50	33	Sdha	3.61454	3.33373
50	34	Sdha	3.74264	3.45875
50	35	Sdha	3.85034	3.56337
50	36	Sdha	3.93745	3.64741
50	37	Sdha	4.00723	3.7141
[truncated: 13,363 more rows]

## Sheet: Results CacnaF1
Experiment Type	Comparative Cт (ΔΔCт)
Instrument Type	QuantStudio(TM) 6 Flex System
Well	Well Position	Sample Name	Target Name	Reporter	RQ	RQ Min	RQ Max	CT	Ct Mean	Delta Ct	Delta Ct Mean	Delta Ct SE	Delta Delta Ct	Automatic Ct Threshold	Tm1	Ct Threshold	Tm2	Automatic Baseline	Tm3	Baseline Start	Baseline End	Comments	MTP
2	A2	wt 1-17	Actb	SYBR				22.3361	22.3851					TRUE	82.3595	0.257872		TRUE		1	40		N
3	A3	wt 1-17	Actb	SYBR				22.4341	22.3851					TRUE	82.3595	0.257872		TRUE		1	40		N
7	A7	wt 1-22	Actb	SYBR				22.2316	22.2698					TRUE	82.4915	0.257872		TRUE		1	40		N
8	A8	wt 1-22	Actb	SYBR				22.1054	22.2698					TRUE	82.4915	0.257872		TRUE		1	40		N
9	A9	wt 1-22	Actb	SYBR				22.4722	22.2698					TRUE	82.4915	0.257872		TRUE		1	40		N
10	A10	wt Z2R	Actb	SYBR				Undetermined						TRUE	81.0398	0.257872	61.1121	TRUE	91.4655	1	40		Y
11	A11	wt Z2R	Actb	SYBR				Undetermined						TRUE	82.7554	0.257872	78.2684	TRUE	93.5771	1	40		Y
12	A12	wt Z2R	Actb	SYBR				Undetermined						TRUE	61.772	0.257872	82.2275	TRUE	66.259	1	40		Y
13	A13	wt Z3R	Actb	SYBR				22.7809	22.7424					TRUE	82.4915	0.257872		TRUE		1	40		N
14	A14	wt Z3R	Actb	SYBR				22.7638	22.7424					TRUE	82.4915	0.257872		TRUE		1	40		N
15	A15	wt Z3R	Actb	SYBR				22.6826	22.7424					TRUE	82.4915	0.257872		TRUE		1	40		N
16	A16	wt 3-2	Actb	SYBR				22.4081	22.2284					TRUE	82.4915	0.257872		TRUE		1	40		N
17	A17	wt 3-2	Actb	SYBR				22.0487	22.2284					TRUE	82.4915	0.257872		TRUE		1	40		N
19	A19	wt 3-3	Actb	SYBR				22.1111	21.6092					TRUE	82.3595	0.257872		TRUE		1	40		N
20	A20	wt 3-3	Actb	SYBR				21.1372	21.6092					TRUE	82.3595	0.257872		TRUE		1	40		N
21	A21	wt 3-3	Actb	SYBR				21.5793	21.6092					TRUE	82.3595	0.257872		TRUE		1	40		N
22	A22	wt 4-3	Actb	SYBR				22.4419	22.4312					TRUE	82.3595	0.257872		TRUE		1	40		N
24	A24	wt 4-3	Actb	SYBR				22.4204	22.4312					TRUE	82.3595	0.257872		TRUE		1	40		N
26	B2	wt 1-17	Gadph	SYBR				18.6679	18.6987					TRUE	82.6235	0.354409		TRUE		1	40		N
27	B3	wt 1-17	Gadph	SYBR				18.7295	18.6987					TRUE	82.6235	0.354409		TRUE		1	40		N
31	B7	wt 1-22	Gadph	SYBR				18.9064	19.0024					TRUE	82.7554	0.354409		TRUE		1	40		N
32	B8	wt 1-22	Gadph	SYBR				19.2119	19.0024					TRUE	82.7554	0.354409		TRUE		1	40		N
33	B9	wt 1-22	Gadph	SYBR				18.889	19.0024					TRUE	82.7554	0.354409		TRUE		1	40		N
37	B13	wt Z3R	Gadph	SYBR				19.9693	19.6006					TRUE	82.7554	0.354409		TRUE		1	40		N
38	B14	wt Z3R	Gadph	SYBR				19.6115	19.6006					TRUE	82.7554	0.354409		TRUE		1	40		N
39	B15	wt Z3R	Gadph	SYBR				19.221	19.6006					TRUE	82.7554	0.354409		TRUE		1	40		N
40	B16	wt 3-2	Gadph	SYBR				19.0662	18.9116					TRUE	82.7554	0.354409		TRUE		1	40		N
42	B18	wt 3-2	Gadph	SYBR				18.7569	18.9116					TRUE	82.6235	0.354409		TRUE		1	40		N
43	B19	wt 3-3	Gadph	SYBR				19.2669	19.2329					TRUE	82.7554	0.354409		TRUE		1	40		N
45	B21	wt 3-3	Gadph	SYBR				19.1989	19.2329					TRUE	82.6235	0.354409		TRUE		1	40		N
46	B22	wt 4-3	Gadph	SYBR				19.4568	19.4883					TRUE	82.6235	0.354409		TRUE		1	40		N
47	B23	wt 4-3	Gadph	SYBR				19.3547	19.4883					TRUE	82.6235	0.354409		TRUE		1	40		N
48	B24	wt 4-3	Gadph	SYBR				19.6535	19.4883					TRUE	82.6235	0.354409		TRUE		1	40		N
50	C2	wt 1-17	Sdha	SYBR				22.9745	23.0665					TRUE	85.5268	0.328158		TRUE		1	40		N
51	C3	wt 1-17	Sdha	SYBR				23.1585	23.0665					TRUE	85.5268	0.328158		TRUE		1	40		N
55	C7	wt 1-22	Sdha	SYBR				23.15	23.1823					TRUE	85.6588	0.328158		TRUE		1	40		N
56	C8	wt 1-22	Sdha	SYBR				23.3704	23.1823					TRUE	85.6588	0.328158		TRUE		1	40		N
57	C9	wt 1-22	Sdha	SYBR				23.0266	23.1823					TRUE	85.6588	0.328158		TRUE		1	40		N
62	C14	wt Z3R	Sdha	SYBR				23.3505	23.2793					TRUE	85.6588	0.328158		TRUE		1	40		N
63	C15	wt Z3R	Sdha	SYBR				23.2082	23.2793					TRUE	85.6588	0.328158		TRUE		1	40		N
64	C16	wt 3-2	Sdha	SYBR				22.3101	22.3965					TRUE	85.6588	0.328158		TRUE		1	40		N
66	C18	wt 3-2	Sdha	SYBR				22.483	22.3965					TRUE	85.6588	0.328158		TRUE		1	40		N
68	C20	wt 3-3	Sdha	SYBR				22.2186	22.1789					TRUE	85.6588	0.328158		TRUE		1	40		N
69	C21	wt 3-3	Sdha	SYBR				22.1392	22.1789					TRUE	85.5268	0.328158		TRUE		1	40		N
70	C22	wt 4-3	Sdha	SYBR				23.0234	22.9414					TRUE	85.5268	0.328158		TRUE		1	40		N
72	C24	wt 4-3	Sdha	SYBR				22.8594	22.9414					TRUE	85.6588	0.328158		TRUE		1	40		N
74	D2	wt 1-17	Cacna1F	SYBR	1	0.864284	1.15703	25.1949	25.1361		3.75263	0.0859952	0	TRUE	82.2275	0.32099		TRUE		1	40		N
75	D3	wt 1-17	Cacna1F	SYBR	1	0.864284	1.15703	25.0773	25.1361		3.75263	0.0859952	0	TRUE	82.2275	0.32099		TRUE		1	40		N
76	D4	wt 1-20	Cacna1F	SYBR				28.2515	28.0904					TRUE	82.0956	0.32099		TRUE		1	40		N
77	D5	wt 1-20	Cacna1F	SYBR				27.8967	28.0904					TRUE	82.2275	0.32099		TRUE		1	40		N
78	D6	wt 1-20	Cacna1F	SYBR				28.1232	28.0904					TRUE	82.2275	0.32099		TRUE		1	40		N
79	D7	wt 1-22	Cacna1F	SYBR	1.44722	1.15137	1.81907	24.7299	24.7042		3.21935	0.148072	-0.53328	TRUE	82.2275	0.32099		TRUE		1	40		N
80	D8	wt 1-22	Cacna1F	SYBR	1.44722	1.15137	1.81907	24.5108	24.7042		3.21935	0.148072	-0.53328	TRUE	82.2275	0.32099		TRUE		1	40		N
81	D9	wt 1-22	Cacna1F	SYBR	1.44722	1.15137	1.81907	24.8719	24.7042		3.21935	0.148072	-0.53328	TRUE	82.2275	0.32099		TRUE		1	40		N
85	D13	wt Z3R	Cacna1F	SYBR	1.24543	0.951489	1.63017	25.397	25.3101		3.43599	0.171687	-0.316642	TRUE	82.2275	0.32099		TRUE		1	40		N
86	D14	wt Z3R	Cacna1F	SYBR	1.24543	0.951489	1.63017	25.1164	25.3101		3.43599	0.171687	-0.316642	TRUE	82.2275	0.32099		TRUE		1	40		N
87	D15	wt Z3R	Cacna1F	SYBR	1.24543	0.951489	1.63017	25.417	25.3101		3.43599	0.171687	-0.316642	TRUE	82.2275	0.32099		TRUE		1	40		N
88	D16	wt 3-2	Cacna1F	SYBR	1.36784	1.06158	1.76245	24.4403	24.4796		3.30073	0.154648	-0.4519	TRUE	82.2275	0.32099		TRUE		1	40		N
89	D17	wt 3-2	Cacna1F	SYBR	1.36784	1.06158	1.76245	24.5824	24.4796		3.30073	0.154648	-0.4519	TRUE	82.2275	0.32099		TRUE		1	40		N
90	D18	wt 3-2	Cacna1F	SYBR	1.36784	1.06158	1.76245	24.416	24.4796		3.30073	0.154648	-0.4519	TRUE	82.2275	0.32099		TRUE		1	40		N
92	D20	wt 3-3	Cacna1F	SYBR	1.94039	1.3393	2.81125	23.6991	23.8033		2.79629	0.226196	-0.956345	TRUE	82.2275	0.32099		TRUE		1	40		N
93	D21	wt 3-3	Cacna1F	SYBR	1.94039	1.3393	2.81125	23.9075	23.8033		2.79629	0.226196	-0.956345	TRUE	82.2275	0.32099		TRUE		1	40		N
95	D23	wt 4-3	Cacna1F	SYBR	1.51359	1.14558	1.99981	24.9277	24.7749		3.15466	0.16996	-0.597973	TRUE	82.2275	0.32099		TRUE		1	40		N
96	D24	wt 4-3	Cacna1F	SYBR	1.51359	1.14558	1.99981	24.6222	24.7749		3.15466	0.16996	-0.597973	TRUE	82.2275	0.32099		TRUE		1	40		N
193	I1	het 1-11	Actb	SYBR				22.837	22.6364					TRUE	82.4915	0.257872		TRUE		1	40		N
194	I2	het 1-11	Actb	SYBR				22.6111	22.6364					TRUE	82.4915	0.257872		TRUE		1	40		N
195	I3	het 1-11	Actb	SYBR				22.4612	22.6364					TRUE	82.4915	0.257872		TRUE		1	40		N
196	I4	het 1-16	Actb	SYBR				21.242	21.3661					TRUE	82.4915	0.257872		TRUE		1	40		N
197	I5	het 1-16	Actb	SYBR				21.4047	21.3661					TRUE	82.4915	0.257872		TRUE		1	40		N
198	I6	het 1-16	Actb	SYBR				21.4515	21.3661					TRUE	82.4915	0.257872		TRUE		1	40		N
199	I7	het 1-19	Actb	SYBR				23.6019	23.5302					TRUE	82.4915	0.257872		TRUE		1	40		N
200	I8	het 1-19	Actb	SYBR				23.4585	23.5302					TRUE	82.6235	0.257872		TRUE		1	40		N
202	I10	het Z1R	Actb	SYBR				21.9095	21.7467					TRUE	82.6235	0.257872		TRUE		1	40		N
204	I12	het Z1R	Actb	SYBR				21.5839	21.7467					TRUE	82.6235	0.257872		TRUE		1	40		N
208	I16	het 3-1	Actb	SYBR				21.2473	21.4534					TRUE	82.6235	0.257872		TRUE		1	40		N
209	I17	het 3-1	Actb	SYBR				21.5146	21.4534					TRUE	82.6235	0.257872		TRUE		1	40		N
210	I18	het 3-1	Actb	SYBR				21.5984	21.4534					TRUE	82.6235	0.257872		TRUE		1	40		N
212	I20	het 4-1	Actb	SYBR				21.8901	21.8166					TRUE	82.6235	0.257872		TRUE		1	40		N
213	I21	het 4-1	Actb	SYBR				21.7431	21.8166					TRUE	82.6235	0.257872		TRUE		1	40		N
215	I23	het 4-2	Actb	SYBR				20.1148	20.3043					TRUE	82.4915	0.257872		TRUE		1	40		N
216	I24	het 4-2	Actb	SYBR				20.4938	20.3043					TRUE	82.6235	0.257872		TRUE		1	40		N
217	J1	het 1-11	Gadph	SYBR				19.2559	19.1438					TRUE	82.6235	0.354409		TRUE		1	40		N
218	J2	het 1-11	Gadph	SYBR				19.1086	19.1438					TRUE	82.6235	0.354409		TRUE		1	40		N
219	J3	het 1-11	Gadph	SYBR				19.0669	19.1438					TRUE	82.7554	0.354409		TRUE		1	40		N
220	J4	het 1-16	Gadph	SYBR				18.7359	18.5473					TRUE	82.7554	0.354409		TRUE		1	40		N
221	J5	het 1-16	Gadph	SYBR				18.578	18.5473					TRUE	82.8874	0.354409		TRUE		1	40		N
222	J6	het 1-16	Gadph	SYBR				18.328	18.5473					TRUE	82.8874	0.354409		TRUE		1	40		N
223	J7	het 1-19	Gadph	SYBR				20.5516	20.6874					TRUE	82.7554	0.354409		TRUE		1	40		N
224	J8	het 1-19	Gadph	SYBR				20.8721	20.6874					TRUE	82.7554	0.354409		TRUE		1	40		N
225	J9	het 1-19	Gadph	SYBR				20.6385	20.6874					TRUE	82.7554	0.354409		TRUE		1	40		N
227	J11	het Z1R	Gadph	SYBR				18.587	18.3239					TRUE	82.8874	0.354409		TRUE		1	40		N
228	J12	het Z1R	Gadph	SYBR				18.0609	18.3239					TRUE	82.8874	0.354409		TRUE		1	40		N
232	J16	het 3-1	Gadph	SYBR				18.6611	18.6646					TRUE	82.8874	0.354409		TRUE		1	40		N
234	J18	het 3-1	Gadph	SYBR				18.6681	18.6646					TRUE	82.8874	0.354409		TRUE		1	40		N
235	J19	het 4-1	Gadph	SYBR				19.3764	19.4546					TRUE	82.8874	0.354409		TRUE		1	40		N
237	J21	het 4-1	Gadph	SYBR				19.5327	19.4546					TRUE	82.8874	0.354409		TRUE		1	40		N
238	J22	het 4-2	Gadph	SYBR				18.4492	18.4709					TRUE	82.8874	0.354409		TRUE		1	40		N
239	J23	het 4-2	Gadph	SYBR				18.4926	18.4709					TRUE	82.8874	0.354409		TRUE		1	40		N
241	K1	het 1-11	Sdha	SYBR				23.4622	23.3261					TRUE	85.6588	0.328158		TRUE		1	40		N
242	K2	het 1-11	Sdha	SYBR				23.4157	23.3261					TRUE	85.6588	0.328158		TRUE		1	40		N
243	K3	het 1-11	Sdha	SYBR				23.1004	23.3261					TRUE	85.6588	0.328158		TRUE		1	40		N
244	K4	het 1-16	Sdha	SYBR				22.076	22.0794					TRUE	85.7908	0.328158		TRUE		1	40		N
245	K5	het 1-16	Sdha	SYBR				22.0827	22.0794					TRUE	85.7908	0.328158		TRUE		1	40		N
247	K7	het 1-19	Sdha	SYBR				25.0982	25.0333					TRUE	85.7908	0.328158		TRUE		1	40		N
248	K8	het 1-19	Sdha	SYBR				24.9685	25.0333					TRUE	85.7908	0.328158		TRUE		1	40		N
250	K10	het Z1R	Sdha	SYBR				21.7654	21.8229					TRUE	85.7908	0.328158		TRUE		1	40		N
251	K11	het Z1R	Sdha	SYBR				21.8803	21.8229					TRUE	85.7908	0.328158		TRUE		1	40		N
256	K16	het 3-1	Sdha	SYBR				21.8887	21.9652					TRUE	85.7908	0.328158		TRUE		1	40		N
257	K17	het 3-1	Sdha	SYBR				21.9698	21.9652					TRUE	85.7908	0.328158		TRUE		1	40		N
258	K18	het 3-1	Sdha	SYBR				22.0371	21.9652					TRUE	85.7908	0.328158		TRUE		1	40		N
259	K19	het 4-1	Sdha	SYBR				22.9722	22.9497					TRUE	85.7908	0.328158		TRUE		1	40		N
260	K20	het 4-1	Sdha	SYBR				22.8607	22.9497					TRUE	85.7908	0.328158		TRUE		1	40		N
261	K21	het 4-1	Sdha	SYBR				23.0162	22.9497					TRUE	85.7908	0.328158		TRUE		1	40		N
262	K22	het 4-2	Sdha	SYBR				21.3616	21.3806					TRUE	85.7908	0.328158		TRUE		1	40		N
263	K23	het 4-2	Sdha	SYBR				21.2194	21.3806					TRUE	85.7908	0.328158		TRUE		1	40		N
264	K24	het 4-2	Sdha	SYBR				21.5607	21.3806					TRUE	85.7908	0.328158		TRUE		1	40		N
265	L1	het 1-11	Cacna1F	SYBR	0.569977	0.43259	0.750996	26.4126	26.2658		4.56366	0.175895	0.811025	TRUE	82.2275	0.32099		TRUE		1	40		N
266	L2	het 1-11	Cacna1F	SYBR	0.569977	0.43259	0.750996	26.1189	26.2658		4.56366	0.175895	0.811025	TRUE	82.2275	0.32099		TRUE		1	40		N
268	L4	het 1-16	Cacna1F	SYBR	0.80591	0.665627	0.975759	24.885	24.7282		4.06394	0.121966	0.311309	TRUE	82.2275	0.32099		TRUE		1	40		N
269	L5	het 1-16	Cacna1F	SYBR	0.80591	0.665627	0.975759	24.5833	24.7282		4.06394	0.121966	0.311309	TRUE	82.2275	0.32099		TRUE		1	40		N
270	L6	het 1-16	Cacna1F	SYBR	0.80591	0.665627	0.975759	24.7163	24.7282		4.06394	0.121966	0.311309	TRUE	82.2275	0.32099		TRUE		1	40		N
271	L7	het 1-19	Cacna1F	SYBR	0.584741	0.509066	0.671665	27.6257	27.6104		4.52676	0.0845564	0.774131	TRUE	82.2275	0.32099		TRUE		1	40		N
272	L8	het 1-19	Cacna1F	SYBR	0.584741	0.509066	0.671665	27.5951	27.6104		4.52676	0.0845564	0.774131	TRUE	82.2275	0.32099		TRUE		1	40		N
274	L10	het Z1R	Cacna1F	SYBR	0.865533	0.637357	1.1754	24.6512	24.5921		3.96097	0.186705	0.20834	TRUE	82.2275	0.32099		TRUE		1	40		N
275	L11	het Z1R	Cacna1F	SYBR	0.865533	0.637357	1.1754	24.6169	24.5921		3.96097	0.186705	0.20834	TRUE	82.3595	0.32099		TRUE		1	40		N
276	L12	het Z1R	Cacna1F	SYBR	0.865533	0.637357	1.1754	24.5082	24.5921		3.96097	0.186705	0.20834	TRUE	82.3595	0.32099		TRUE		1	40		N
280	L16	het 3-1	Cacna1F	SYBR	0.774997	0.642344	0.935045	24.8104	24.8148		4.12037	0.119729	0.367737	TRUE	82.3595	0.32099		TRUE		1	40		N
281	L17	het 3-1	Cacna1F	SYBR	0.774997	0.642344	0.935045	24.6517	24.8148		4.12037	0.119729	0.367737	TRUE	82.3595	0.32099		TRUE		1	40		N
282	L18	het 3-1	Cacna1F	SYBR	0.774997	0.642344	0.935045	24.9823	24.8148		4.12037	0.119729	0.367737	TRUE	82.3595	0.32099		TRUE		1	40		N
284	L20	het 4-1	Cacna1F	SYBR	0.950481	0.790994	1.14213	25.1401	25.2329		3.8259	0.112065	0.0732701	TRUE	82.2275	0.32099		TRUE		1	40		N
285	L21	het 4-1	Cacna1F	SYBR	0.950481	0.790994	1.14213	25.3257	25.2329		3.8259	0.112065	0.0732701	TRUE	82.2275	0.32099		TRUE		1	40		N
286	L22	het 4-2	Cacna1F	SYBR	0.893417	0.724209	1.10216	24.0789	23.9671		3.91523	0.131365	0.162595	TRUE	82.2275	0.32099		TRUE		1	40		N
287	L23	het 4-2	Cacna1F	SYBR	0.893417	0.724209	1.10216	23.8911	23.9671		3.91523	0.131365	0.162595	TRUE	82.2275	0.32099		TRUE		1	40		N
288	L24	het 4-2	Cacna1F	SYBR	0.893417	0.724209	1.10216	23.9314	23.9671		3.91523	0.131365	0.162595	TRUE	82.2275	0.32099		TRUE		1	40		N
Analysis Type	Singleplex
Endogenous Control	Actb, Gadph, Sdha
RQ Min/Max Confidence Level	95.0
Reference Sample	wt 1-17

## Sheet: Amplification data CacnaF1
Experiment Type	Comparative Cт (ΔΔCт)
Instrument Type	QuantStudio(TM) 6 Flex System
Well	Cycle	Target Name	Rn	Delta Rn
1	1
1	2
1	3
1	4
1	5
1	6
1	7
1	8
1	9
1	10
1	11
1	12
1	13
1	14
1	15
1	16
1	17
1	18
1	19
1	20
1	21
1	22
1	23
1	24
1	25
1	26
1	27
1	28
1	29
1	30
1	31
1	32
1	33
1	34
1	35
1	36
1	37
1	38
1	39
1	40
2	1	Actb	0.189758	-0.0143799
2	2	Actb	0.192994	-0.0144338
2	3	Actb	0.202143	-0.00857297
2	4	Actb	0.211448	-0.00255771
2	5	Actb	0.21803	0.000734909
2	6	Actb	0.223433	0.00284901
2	7	Actb	0.227515	0.00364176
2	8	Actb	0.231785	0.00462282
2	9	Actb	0.234664	0.00421275
2	10	Actb	0.236296	0.00255602
2	11	Actb	0.237353	0.000323702
2	12	Actb	0.240272	-4.70425e-05
2	13	Actb	0.242528	-0.00107986
2	14	Actb	0.245097	-0.00179974
2	15	Actb	0.246578	-0.00360799
2	16	Actb	0.252199	-0.00127566
2	17	Actb	0.259506	0.00274159
2	18	Actb	0.270911	0.0108579
2	19	Actb	0.289165	0.0258226
2	20	Actb	0.320582	0.0539504
2	21	Actb	0.380366	0.110446
2	22	Actb	0.481719	0.208509
2	23	Actb	0.645295	0.368796
2	24	Actb	0.884516	0.604728
2	25	Actb	1.19393	0.910851
2	26	Actb	1.52943	1.24306
2	27	Actb	1.843	1.55334
2	28	Actb	2.11356	1.82062
2	29	Actb	2.33648	2.04025
2	30	Actb	2.52238	2.22285
2	31	Actb	2.67286	2.37005
2	32	Actb	2.79982	2.49372
2	33	Actb	2.90056	2.59117
2	34	Actb	2.98262	2.66994
2	35	Actb	3.04199	2.72602
2	36	Actb	3.09326	2.774
2	37	Actb	3.12961	2.80706
2	38	Actb	3.16124	2.8354
2	39	Actb	3.18941	2.86029
2	40	Actb	3.20381	2.87139
3	1	Actb	0.193416	-0.0158948
3	2	Actb	0.198027	-0.0145479
3	3	Actb	0.2095	-0.00633937
3	4	Actb	0.216917	-0.00218668
3	5	Actb	0.224089	0.0017204
3	6	Actb	0.228598	0.00296535
3	7	Actb	0.230682	0.00178468
3	8	Actb	0.234563	0.00240134
3	9	Actb	0.237748	0.002322
3	10	Actb	0.24113	0.00243874
3	11	Actb	0.243463	0.00150707
3	12	Actb	0.244951	-0.000269222
3	13	Actb	0.247211	-0.0012732
3	14	Actb	0.249263	-0.00248562
3	15	Actb	0.252792	-0.00222131
3	16	Actb	0.256382	-0.00189579
3	17	Actb	0.263074	0.00153161
3	18	Actb	0.272344	0.0075367
3	19	Actb	0.290057	0.0219853
3	20	Actb	0.321112	0.049776
3	21	Actb	0.376801	0.1022
3	22	Actb	0.473387	0.195522
3	23	Actb	0.6327	0.351571
3	24	Actb	0.865933	0.581539
3	25	Actb	1.17177	0.884114
3	26	Actb	1.51186	1.22094
3	27	Actb	1.83287	1.53868
3	28	Actb	2.10426	1.80681
3	29	Actb	2.33238	2.03167
3	30	Actb	2.52689	2.22291
3	31	Actb	2.68655	2.3793
3	32	Actb	2.81137	2.50086
3	33	Actb	2.91571	2.60193
3	34	Actb	2.99868	2.68164
3	35	Actb	3.05886	2.73856
3	36	Actb	3.10603	2.78246
3	37	Actb	3.14427	2.81744
3	38	Actb	3.17085	2.84075
3	39	Actb	3.1874	2.85404
3	40	Actb	3.19412	2.85749
4	1
4	2
4	3
4	4
4	5
4	6
4	7
4	8
4	9
4	10
4	11
4	12
4	13
4	14
4	15
4	16
4	17
4	18
4	19
4	20
4	21
4	22
4	23
4	24
4	25
4	26
4	27
4	28
4	29
4	30
4	31
4	32
4	33
4	34
4	35
4	36
4	37
4	38
4	39
4	40
5	1
5	2
5	3
5	4
5	5
5	6
5	7
5	8
5	9
5	10
5	11
5	12
5	13
5	14
5	15
5	16
5	17
5	18
5	19
5	20
5	21
5	22
5	23
5	24
5	25
5	26
5	27
5	28
5	29
5	30
5	31
5	32
5	33
5	34
5	35
5	36
5	37
5	38
5	39
5	40
6	1
6	2
6	3
6	4
6	5
6	6
6	7
6	8
6	9
6	10
6	11
6	12
6	13
6	14
6	15
6	16
6	17
6	18
6	19
6	20
6	21
6	22
6	23
6	24
6	25
6	26
6	27
6	28
6	29
6	30
6	31
6	32
6	33
6	34
6	35
6	36
6	37
6	38
6	39
6	40
7	1	Actb	0.164909	-0.0151148
7	2	Actb	0.170427	-0.0129102
7	3	Actb	0.181376	-0.00527488
7	4	Actb	0.188339	-0.00162571
7	5	Actb	0.194045	0.000766918
7	6	Actb	0.198854	0.00226216
7	7	Actb	0.202691	0.00278473
7	8	Actb	0.205836	0.00261667
7	9	Actb	0.208776	0.00224311
7	10	Actb	0.211327	0.00148048
7	11	Actb	0.21349	0.00032973
7	12	Actb	0.216047	-0.000426539
7	13	Actb	0.217849	-0.00193889
7	14	Actb	0.220683	-0.00241821
7	15	Actb	0.22523	-0.00118501
7	16	Actb	0.228453	-0.00127524
7	17	Actb	0.234703	0.00166068
7	18	Actb	0.2461	0.00974419
7	19	Actb	0.266011	0.0263411
7	20	Actb	0.300029	0.0570453
7	21	Actb	0.363811	0.117514
7	22	Actb	0.47137	0.221759
7	23	Actb	0.643427	0.390503
7	24	Actb	0.896227	0.63999
7	25	Actb	1.21994	0.960387
7	26	Actb	1.57165	1.30878
7	27	Actb	1.89698	1.6308
7	28	Actb	2.16798	1.89849
7	29	Actb	2.38754	2.11474
7	30	Actb	2.57261	2.29649
7	31	Actb	2.72284	2.44341
7	32	Actb	2.84445	2.5617
7	33	Actb	2.93435	2.64829
7	34	Actb	3.01845	2.72908
7	35	Actb	3.07896	2.78627
7	36	Actb	3.13345	2.83745
7	37	Actb	3.17474	2.87543
7	38	Actb	3.20856	2.90593
7	39	Actb	3.23022	2.92428
7	40	Actb	3.24786	2.93861
8	1	Actb	0.195877	-0.0174995
8	2	Actb	0.20194	-0.0145913
8	3	Actb	0.214649	-0.00503754
8	4	Actb	0.225295	0.00245359
8	5	Actb	0.226827	0.000829806
8	6	Actb	0.229334	0.000181685
8	7	Actb	0.234077	0.00176995
8	8	Actb	0.236657	0.00119441
8	9	Actb	0.238712	9.44259e-05
8	10	Actb	0.240978	-0.00079478
8	11	Actb	0.24581	0.000882038
8	12	Actb	0.248673	0.000590368
8	13	Actb	0.251507	0.000268777
8	14	Actb	0.253347	-0.00104635
8	15	Actb	0.255786	-0.00176224
8	16	Actb	0.261079	0.000375858
8	17	Actb	0.267212	0.00335325
8	18	Actb	0.278744	0.0117302
8	19	Actb	0.299034	0.028865
8	20	Actb	0.337378	0.0640536
8	21	Actb	0.404419	0.12794
8	22	Actb	0.518158	0.238524
8	23	Actb	0.701268	0.418478
8	24	Actb	0.966625	0.68068
8	25	Actb	1.30738	1.01828
8	26	Actb	1.67515	1.3829
8	27	Actb	2.00769	1.71228
8	28	Actb	2.28505	1.98648
8	29	Actb	2.51353	2.21181
8	30	Actb	2.69122	2.38634
8	31	Actb	2.84177	2.53374
8	32	Actb	2.96675	2.65557
8	33	Actb	3.06897	2.75462
8	34	Actb	3.1512	2.83371
8	35	Actb	3.21874	2.89809
8	36	Actb	3.26691	2.9431
8	37	Actb	3.30532	2.97835
8	38	Actb	3.34062	3.0105
8	39	Actb	3.36574	3.03246
8	40	Actb	3.38577	3.04934
9	1	Actb	0.167585	-0.0158684
9	2	Actb	0.173081	-0.0137571
9	3	Actb	0.183578	-0.00664524
9	4	Actb	0.192006	-0.00160123
9	5	Actb	0.198194	0.00120183
9	6	Actb	0.202165	0.00178802
9	7	Actb	0.206007	0.0022458
9	8	Actb	0.209842	0.0026957
9	9	Actb	0.213592	0.00306055
9	10	Actb	0.216419	0.00250293
9	11	Actb	0.218516	0.00121594
9	12	Actb	0.221195	0.000509745
9	13	Actb	0.222739	-0.00133098
9	14	Actb	0.225012	-0.00244257
9	15	Actb	0.228614	-0.00222519
9	16	Actb	0.232516	-0.00170746
9	17	Actb	0.238341	0.000732147
9	18	Actb	0.248511	0.00751812
9	19	Actb	0.265191	0.0208135
9	20	Actb	0.295537	0.0477744
9	21	Actb	0.350389	0.0992417
9	22	Actb	0.446003	0.191471
9	23	Actb	0.601394	0.343477
9	24	Actb	0.834468	0.573166
9	25	Actb	1.13725	0.872568
9	26	Actb	1.4738	1.20573
9	27	Actb	1.79645	1.525
9	28	Actb	2.06913	1.79429
9	29	Actb	2.29168	2.01345
9	30	Actb	2.47236	2.19075
9	31	Actb	2.61958	2.33458
9	32	Actb	2.73804	2.44966
9	33	Actb	2.83115	2.53939
9	34	Actb	2.90281	2.60766
9	35	Actb	2.96929	2.67075
9	36	Actb	3.01697	2.71505
9	37	Actb	3.04667	2.74137
9	38	Actb	3.0801	2.77141
9	39	Actb	3.10128	2.78921
9	40	Actb	3.11372	2.79826
10	1	Actb	0.139782	-0.0279032
10	2	Actb	0.145444	-0.0239206
10	3	Actb	0.155256	-0.0157879
10	4	Actb	0.16297	-0.00975308
10	5	Actb	0.16892	-0.00548276
10	6	Actb	0.173557	-0.00252424
10	7	Actb	0.177949	0.00018837
10	8	Actb	0.181329	0.00188949
10	9	Actb	0.183736	0.00261714
10	10	Actb	0.18542	0.00262162
10	11	Actb	0.187072	0.00259441
10	12	Actb	0.189924	0.00376751
10	13	Actb	0.192387	0.00455114
10	14	Actb	0.193187	0.00367168
10	15	Actb	0.194528	0.00333336
10	16	Actb	0.195169	0.00229547
10	17	Actb	0.197476	0.00292378
10	18	Actb	0.199304	0.00307203
10	19	Actb	0.199883	0.00197242
10	20	Actb	0.202206	0.0026155
10	21	Actb	0.203062	0.00179302
10	22	Actb	0.204644	0.0016952
10	23	Actb	0.207676	0.00304823
10	24	Actb	0.207641	0.00133416
10	25	Actb	0.21031	0.00232387
10	26	Actb	0.211635	0.00196962
10	27	Actb	0.213133	0.00178831
10	28	Actb	0.214873	0.00184887
10	29	Actb	0.216569	0.00186619
10	30	Actb	0.217446	0.00106399
10	31	Actb	0.218792	0.00073093
10	32	Actb	0.220186	0.000445892
10	33	Actb	0.220852	-0.000567499
10	34	Actb	0.221632	-0.00146728
10	35	Actb	0.223185	-0.00159285
10	36	Actb	0.22345	-0.00300722
10	37	Actb	0.22363	-0.0045067
10	38	Actb	0.222973	-0.00684252
10	39	Actb	0.225005	-0.00649015
10	40	Actb	0.227958	-0.00521624
11	1	Actb	0.133388	-0.0265982
11	2	Actb	0.1388	-0.0226135
11	3	Actb	0.148643	-0.0141991
11	4	Actb	0.156463	-0.00780709
11	5	Actb	0.16109	-0.00460781
11	6	Actb	0.164069	-0.00305652
11	7	Actb	0.167686	-0.000867066
11	8	Actb	0.171748	0.00176746
11	9	Actb	0.173867	0.00245871
11	10	Actb	0.176586	0.00374901
11	11	Actb	0.17685	0.00258544
11	12	Actb	0.176963	0.0012704
11	13	Actb	0.179265	0.0021445
11	14	Actb	0.181629	0.00308135
11	15	Actb	0.182751	0.00277519
11	16	Actb	0.184374	0.00297014
11	17	Actb	0.186492	0.00366044
11	18	Actb	0.186734	0.00247434
11	19	Actb	0.188355	0.00266839
11	20	Actb	0.190633	0.00351825
11	21	Actb	0.191559	0.00301671
11	22	Actb	0.192496	0.00252531
11	23	Actb	0.192851	0.00145301
11	24	Actb	0.194028	0.00120221
11	25	Actb	0.197008	0.00275425
11	26	Actb	0.19832	0.00263847
11	27	Actb	0.198348	0.00123839
11	28	Actb	0.200012	0.0014742
11	29	Actb	0.201199	0.00123405
11	30	Actb	0.20179	0.000397214
11	31	Actb	0.203123	0.000301727
11	32	Actb	0.203381	-0.000867612
11	33	Actb	0.204283	-0.00139406
11	34	Actb	0.205203	-0.00190138
11	35	Actb	0.206373	-0.0021592
11	36	Actb	0.206288	-0.0036723
11	37	Actb	0.207676	-0.0037119
11	38	Actb	0.208373	-0.00444325
11	39	Actb	0.209572	-0.00467184
11	40	Actb	0.211194	-0.0044779
12	1	Actb	0.167661	-0.0354102
12	2	Actb	0.172272	-0.0329606
12	3	Actb	0.185172	-0.0222219
12	4	Actb	0.194079	-0.015477
12	5	Actb	0.202432	-0.00928513
12	6	Actb	0.208853	-0.00502639
12	7	Actb	0.215033	-0.00100798
12	8	Actb	0.219246	0.00104369
12	9	Actb	0.223203	0.00283838
12	10	Actb	0.226184	0.00365801
12	11	Actb	0.229015	0.00432785
12	12	Actb	0.233764	0.00691498
12	13	Actb	0.234833	0.00582277
12	14	Actb	0.237161	0.00598829
12	15	Actb	0.240138	0.00680384
12	16	Actb	0.241555	0.00605978
12	17	Actb	0.24413	0.00647286
12	18	Actb	0.245628	0.0058092
12	19	Actb	0.247578	0.0055977
12	20	Actb	0.248051	0.00390884
12	21	Actb	0.250251	0.00394766
12	22	Actb	0.251801	0.00333569
12	23	Actb	0.253964	0.00333723
12	24	Actb	0.25653	0.0037414
12	25	Actb	0.258303	0.00335292
12	26	Actb	0.260549	0.00343687
12	27	Actb	0.260458	0.00118443
12	28	Actb	0.26141	-2.47459e-05
12	29	Actb	0.264864	0.00126685
12	30	Actb	0.266885	0.00112707
12	31	Actb	0.267542	-0.000377718
12	32	Actb	0.268853	-0.00122849
12	33	Actb	0.269236	-0.0030071
12	34	Actb	0.271112	-0.00329321
12	35	Actb	0.272865	-0.00370163
12	36	Actb	0.27352	-0.00520859
12	37	Actb	0.27442	-0.00646981
12	38	Actb	0.276546	-0.00650567
12	39	Actb	0.278072	-0.00714094
12	40	Actb	0.278402	-0.00897266
13	1	Actb	0.176125	-0.017324
13	2	Actb	0.183	-0.0138851
13	3	Actb	0.193356	-0.00696554
13	4	Actb	0.200764	-0.00299447
13	5	Actb	0.207568	0.000372917
13	6	Actb	0.212945	0.00231386
13	7	Actb	0.217377	0.00330981
13	8	Actb	0.221397	0.00389367
13	9	Actb	0.223892	0.00295152
13	10	Actb	0.225779	0.00140253
13	11	Actb	0.230218	0.00240531
13	12	Actb	0.232569	0.00131981
13	13	Actb	0.233836	-0.00084924
13	14	Actb	0.23639	-0.00173221
13	15	Actb	0.239324	-0.00223432
13	16	Actb	0.241973	-0.00302141
13	17	Actb	0.248259	-0.000172232
13	18	Actb	0.255967	0.00410005
13	19	Actb	0.269844	0.0145405
13	20	Actb	0.297049	0.0383087
13	21	Actb	0.342407	0.0802302
13	22	Actb	0.424519	0.158906
13	23	Actb	0.559669	0.29062
13	24	Actb	0.771323	0.498837
13	25	Actb	1.06263	0.786708
13	26	Actb	1.41029	1.13093
13	27	Actb	1.76071	1.47791
13	28	Actb	2.0661	1.77987
13	29	Actb	2.31244	2.02277
13	30	Actb	2.51425	2.22115
13	31	Actb	2.6858	2.38926
13	32	Actb	2.82583	2.52585
13	33	Actb	2.93801	2.6346
13	34	Actb	3.02767	2.72082
13	35	Actb	3.09973	2.78944
13	36	Actb	3.15895	2.84523
13	37	Actb	3.20328	2.88613
13	38	Actb	3.24227	2.92167
13	39	Actb	3.279	2.95497
13	40	Actb	3.30246	2.97499
14	1	Actb	0.179731	-0.0155682
14	2	Actb	0.185884	-0.0127432
14	3	Actb	0.196322	-0.00563328
14	4	Actb	0.204064	-0.00121813
14	5	Actb	0.208898	0.000288438
14	6	Actb	0.21366	0.00172252
14	7	Actb	0.217433	0.00216759
14	8	Actb	0.220426	0.00183344
14	9	Actb	0.2245	0.00257954
14	10	Actb	0.227597	0.00234867
14	11	Actb	0.229489	0.000913761
14	12	Actb	0.232334	0.000431437
14	13	Actb	0.235622	0.000391632
14	14	Actb	0.236523	-0.00203565
14	15	Actb	0.239751	-0.00213452
14	16	Actb	0.243422	-0.00179164
14	17	Actb	0.248677	0.000136183
14	18	Actb	0.257694	0.00582506
14	19	Actb	0.271943	0.0167473
14	20	Actb	0.297427	0.0389033
14	21	Actb	0.343724	0.0818723
14	22	Actb	0.425932	0.160754
14	23	Actb	0.5614	0.292893
14	24	Actb	0.772046	0.500212
14	25	Actb	1.05802	0.782856
14	26	Actb	1.39626	1.11777
14	27	Actb	1.73169	1.44987
14	28	Actb	2.02322	1.73808
14	29	Actb	2.26481	1.97633
14	30	Actb	2.46909	2.17729
14	31	Actb	2.63772	2.34259
14	32	Actb	2.77065	2.4722
14	33	Actb	2.87738	2.5756
14	34	Actb	2.98089	2.67578
14	35	Actb	3.07016	2.76172
14	36	Actb	3.13375	2.82198
14	37	Actb	3.17991	2.86482
14	38	Actb	3.22383	2.90541
14	39	Actb	3.26402	2.94227
14	40	Actb	3.28961	2.96454
15	1	Actb	0.160903	-0.0144073
15	2	Actb	0.166039	-0.0122633
15	3	Actb	0.175518	-0.00577655
15	4	Actb	0.182006	-0.00228017
15	5	Actb	0.187765	0.000486031
15	6	Actb	0.19253	0.00225979
15	7	Actb	0.195983	0.00272023
15	8	Actb	0.199397	0.00314219
15	9	Actb	0.201903	0.00265653
15	10	Actb	0.203348	0.00110909
15	11	Actb	0.206452	0.0012213
15	12	Actb	0.207895	-0.00032812
15	13	Actb	0.210959	-0.000256492
15	14	Actb	0.21314	-0.00106783
15	15	Actb	0.215304	-0.00189552
15	16	Actb	0.217851	-0.00234066
15	17	Actb	0.223534	0.000350188
15	18	Actb	0.233183	0.0070068
15	19	Actb	0.247088	0.0179199
15	20	Actb	0.274008	0.0418484
15	21	Actb	0.322268	0.0871165
15	22	Actb	0.407572	0.169428
15	23	Actb	0.547981	0.306845
15	24	Actb	0.763545	0.519417
15	25	Actb	1.05688	0.809759
15	26	Actb	1.39445	1.14434
15	27	Actb	1.72749	1.47439
15	28	Actb	2.01209	1.75599
15	29	Actb	2.25156	1.99247
15	30	Actb	2.45227	2.19019
15	31	Actb	2.61605	2.35098
15	32	Actb	2.74988	2.48181
15	33	Actb	2.86181	2.59075
15	34	Actb	2.94894	2.67489
15	35	Actb	3.02178	2.74474
15	36	Actb	3.08823	2.8082
15	37	Actb	3.13733	2.8543
15	38	Actb	3.18391	2.8979
15	39	Actb	3.21577	2.92676
15	40	Actb	3.24729	2.95529
16	1	Actb	0.173769	-0.0151806
16	2	Actb	0.17889	-0.0134331
16	3	Actb	0.190277	-0.00542041
16	4	Actb	0.197253	-0.00181848
16	5	Actb	0.202303	-0.000143379
16	6	Actb	0.207567	0.00174664
16	7	Actb	0.212136	0.00294184
16	8	Actb	0.215434	0.00286586
16	9	Actb	0.218363	0.00242031
16	10	Actb	0.221319	0.0020023
16	11	Actb	0.223813	0.00112177
16	12	Actb	0.226625	0.000559954
16	13	Actb	0.228582	-0.000857477
16	14	Actb	0.2311	-0.0017133
16	15	Actb	0.233257	-0.00293071
16	16	Actb	0.237906	-0.00165549
16	17	Actb	0.243817	0.000880555
16	18	Actb	0.254478	0.00816756
16	19	Actb	0.271688	0.0220034
16	20	Actb	0.303078	0.0500198
16	21	Actb	0.359471	0.103039
16	22	Actb	0.458323	0.198516
16	23	Actb	0.623249	0.360067
16	24	Actb	0.87607	0.609514
16	25	Actb	1.21627	0.94634
16	26	Actb	1.61361	1.34031
16	27	Actb	2.00033	1.72366
16	28	Actb	2.32409	2.04404
16	29	Actb	2.58457	2.30114
16	30	Actb	2.797	2.5102
16	31	Actb	2.97104	2.68086
16	32	Actb	3.12196	2.82841
16	33	Actb	3.23496	2.93803
16	34	Actb	3.33182	3.03153
16	35	Actb	3.41279	3.10911
16	36	Actb	3.48019	3.17315
16	37	Actb	3.53298	3.22256
16	38	Actb	3.58139	3.2676
16	39	Actb	3.61739	3.30023
16	40	Actb	3.65529	3.33475
17	1	Actb	0.188292	-0.0176863
17	2	Actb	0.194446	-0.0148858
17	3	Actb	0.205737	-0.00694919
17	4	Actb	0.214274	-0.00176603
17	5	Actb	0.220071	0.000677232
17	6	Actb	0.225401	0.00265314
17	7	Actb	0.230317	0.00421527
17	8	Actb	0.232759	0.00330292
17	9	Actb	0.235393	0.00258273
17	10	Actb	0.237092	0.000928103
17	11	Actb	0.239693	0.000175114
17	12	Actb	0.242624	-0.00024786
17	13	Actb	0.244163	-0.00206293
17	14	Actb	0.248294	-0.00128594
17	15	Actb	0.251353	-0.00158103
17	16	Actb	0.255647	-0.000641519
17	17	Actb	0.262082	0.00243953
17	18	Actb	0.2739	0.0109044
17	19	Actb	0.295658	0.0293075
17	20	Actb	0.33437	0.0646665
17	21	Actb	0.402768	0.12971
17	22	Actb	0.52246	0.246048
17	23	Actb	0.717262	0.437496
17	24	Actb	1.00003	0.716906
17	25	Actb	1.36363	1.07716
17	26	Actb	1.75615	1.46632
17	27	Actb	2.11323	1.82005
17	28	Actb	2.39982	2.10329
17	29	Actb	2.63403	2.33414
17	30	Actb	2.8213	2.51806
17	31	Actb	2.97089	2.66429
17	32	Actb	3.09563	2.78568
17	33	Actb	3.19844	2.88513
17	34	Actb	3.27844	2.96178
17	35	Actb	3.34754	3.02752
17	36	Actb	3.41476	3.0914
17	37	Actb	3.46227	3.13555
17	38	Actb	3.50347	3.17339
17	39	Actb	3.53008	3.19665
17	40	Actb	3.55077	3.21399
18	1
18	2
18	3
18	4
18	5
18	6
18	7
18	8
18	9
18	10
18	11
18	12
18	13
18	14
18	15
18	16
18	17
18	18
18	19
18	20
18	21
18	22
18	23
18	24
18	25
18	26
18	27
18	28
18	29
18	30
18	31
18	32
18	33
18	34
18	35
18	36
18	37
18	38
18	39
18	40
19	1	Actb	0.174818	-0.016361
19	2	Actb	0.179746	-0.0148891
19	3	Actb	0.190927	-0.00716328
19	4	Actb	0.199628	-0.0019186
19	5	Actb	0.206313	0.00131109
19	6	Actb	0.21131	0.00285243
19	7	Actb	0.214787	0.00287382
19	8	Actb	0.217805	0.00243549
19	9	Actb	0.221456	0.00263087
19	10	Actb	0.223394	0.00111364
19	11	Actb	0.227496	0.00175992
19	12	Actb	0.229494	0.000302758
19	13	Actb	0.232603	-4.4614e-05
19	14	Actb	0.233851	-0.00225241
19	15	Actb	0.23694	-0.00261869
19	16	Actb	0.241732	-0.00128243
19	17	Actb	0.248673	0.0022033
19	18	Actb	0.260287	0.0103616
19	19	Actb	0.281999	0.0286173
19	20	Actb	0.31894	0.0621034
19	21	Actb	0.385987	0.125694
19	22	Actb	0.502139	0.238391
19	23	Actb	0.691306	0.424102
19	24	Actb	0.972486	0.701826
19	25	Actb	1.34437	1.07025
19	26	Actb	1.75843	1.48086
19	27	Actb	2.14091	1.85989
19	28	Actb	2.45909	2.17461
19	29	Actb	2.71389	2.42595
19	30	Actb	2.91327	2.62188
19	31	Actb	3.08401	2.78916
19	32	Actb	3.22017	2.92186
19	33	Actb	3.32599	3.02423
19	34	Actb	3.41911	3.11389
19	35	Actb	3.49619	3.18751
19	36	Actb	3.56308	3.25095
19	37	Actb	3.61741	3.30182
19	38	Actb	3.6694	3.35036
19	39	Actb	3.69671	3.37422
19	40	Actb	3.71991	3.39396
20	1	Actb	0.189913	-0.0150577
20	2	Actb	0.195778	-0.0130799
20	3	Actb	0.206665	-0.00608117
20	4	Actb	0.215809	-0.000824265
20	5	Actb	0.221582	0.00106176
20	6	Actb	0.226968	0.00255976
20	7	Actb	0.231862	0.00356674
20	8	Actb	0.235649	0.00346647
20	9	Actb	0.237601	0.00153101
20	10	Actb	0.240058	0.000100899
20	11	Actb	0.24363	-0.000215198
20	12	Actb	0.246385	-0.00134742
20	13	Actb	0.249609	-0.00201044
20	14	Actb	0.252668	-0.00283872
20	15	Actb	0.258083	-0.00131104
20	16	Actb	0.265624	0.00234161
20	17	Actb	0.276211	0.0090414
20	18	Actb	0.296604	0.0255474
20	19	Actb	0.334	0.0590558
20	20	Actb	0.402046	0.123214
20	21	Actb	0.517137	0.234418
20	22	Actb	0.702606	0.415999
20	23	Actb	0.980969	0.690475
20	24	Actb	1.34074	1.04636
20	25	Actb	1.7345	1.43623
20	26	Actb	2.09097	1.78881
20	27	Actb	2.3783	2.07226
20	28	Actb	2.60683	2.2969
20	29	Actb	2.7989	2.48508
20	30	Actb	2.95341	2.6357
20	31	Actb	3.08067	2.75908
20	32	Actb	3.18481	2.85933
20	33	Actb	3.26306	2.93369
20	34	Actb	3.3268	2.99355
20	35	Actb	3.39118	3.05404
20	36	Actb	3.44156	3.10053
20	37	Actb	3.48642	3.1415
20	38	Actb	3.51344	3.16464
20	39	Actb	3.53996	3.18727
20	40	Actb	3.55752	3.20094
21	1	Actb	0.15862	-0.0147261
21	2	Actb	0.163723	-0.0129754
21	3	Actb	0.173733	-0.00631823
21	4	Actb	0.182464	-0.000940074
21	5	Actb	0.187476	0.000719547
21	6	Actb	0.192236	0.00212683
21	7	Actb	0.197419	0.00395639
21	8	Actb	0.199979	0.00316441
21	9	Actb	0.202118	0.00195
21	10	Actb	0.203988	0.00046735
21	11	Actb	0.206533	-0.000339588
21	12	Actb	0.209208	-0.00101827
21	13	Actb	0.212522	-0.00105633
21	14	Actb	0.215954	-0.000977658
21	15	Actb	0.218037	-0.00224688
21	16	Actb	0.224149	0.000512511
21	17	Actb	0.234552	0.00756303
21	18	Actb	0.250836	0.0204942
21	19	Actb	0.279028	0.045333
21	20	Actb	0.330552	0.0935045
21	21	Actb	0.41988	0.179479
21	22	Actb	0.569281	0.325528
21	23	Actb	0.80068	0.553574
21	24	Actb	1.11354	0.863085
21	25	Actb	1.48018	1.22637
21	26	Actb	1.83919	1.58203
21	27	Actb	2.12989	1.86937
21	28	Actb	2.36123	2.09736
21	29	Actb	2.55458	2.28736
21	30	Actb	2.70655	2.43597
21	31	Actb	2.83603	2.5621
21	32	Actb	2.93978	2.6625
21	33	Actb	3.02581	2.74518
21	34	Actb	3.0907	2.80672
21	35	Actb	3.14702	2.85969
21	36	Actb	3.19362	2.90293
21	37	Actb	3.23423	2.94019
21	38	Actb	3.26953	2.97213
21	39	Actb	3.29426	2.99351
21	40	Actb	3.31394	3.00984
22	1	Actb	0.151429	-0.0122946
22	2	Actb	0.156555	-0.0101207
22	3	Actb	0.165078	-0.00455115
22	4	Actb	0.171812	-0.000769948
22	5	Actb	0.176119	0.000584464
22	6	Actb	0.180729	0.00224135
22	7	Actb	0.184082	0.00264144
22	8	Actb	0.185219	0.00082649
22	9	Actb	0.188721	0.00137564
22	10	Actb	0.191163	0.000864028
22	11	Actb	0.193404	0.000152722
22	12	Actb	0.196019	-0.000184878
22	13	Actb	0.199143	-1.42145e-05
22	14	Actb	0.201152	-0.000957517
22	15	Actb	0.202593	-0.00246919
22	16	Actb	0.207042	-0.000973311
22	17	Actb	0.212202	0.00123407
22	18	Actb	0.220251	0.00633054
22	19	Actb	0.23909	0.0222165
22	20	Actb	0.26975	0.0499232
22	21	Actb	0.32552	0.102741
22	22	Actb	0.422729	0.196997
22	23	Actb	0.57597	0.347285
22	24	Actb	0.801729	0.570092
22	25	Actb	1.09507	0.860477
22	26	Actb	1.41454	1.177
22	27	Actb	1.70953	1.46903
22	28	Actb	1.95118	1.70773
22	29	Actb	2.1485	1.9021
22	30	Actb	2.31625	2.06689
22	31	Actb	2.45061	2.1983
22	32	Actb	2.55437	2.29911
22	33	Actb	2.64863	2.39041
22	34	Actb	2.72076	2.4596
22	35	Actb	2.77507	2.51095
22	36	Actb	2.82219	2.55512
22	37	Actb	2.86531	2.59529
22	38	Actb	2.89869	2.62572
22	39	Actb	2.92477	2.64884
22	40	Actb	2.94479	2.6659
23	1
23	2
23	3
23	4
23	5
23	6
23	7
23	8
23	9
23	10
23	11
23	12
23	13
23	14
23	15
23	16
23	17
23	18
23	19
23	20
23	21
23	22
23	23
23	24
23	25
23	26
23	27
23	28
23	29
23	30
23	31
23	32
23	33
23	34
23	35
23	36
23	37
23	38
23	39
23	40
24	1	Actb	0.221983	-0.0153875
24	2	Actb	0.228192	-0.0124986
24	3	Actb	0.239179	-0.00483191
24	4	Actb	0.246619	-0.000711792
24	5	Actb	0.252197	0.00154606
24	6	Actb	0.255493	0.00152169
24	7	Actb	0.258525	0.00123372
24	8	Actb	0.262787	0.00217483
24	9	Actb	0.265411	0.00147899
24	10	Actb	0.268071	0.000818636
24	11	Actb	0.271236	0.000663883
24	12	Actb	0.274821	0.00092839
24	13	Actb	0.276071	-0.00114194
24	14	Actb	0.27823	-0.00230344
24	15	Actb	0.281809	-0.00204457
24	16	Actb	0.286252	-0.000922202
24	17	Actb	0.292084	0.00158967
24	18	Actb	0.30148	0.00766545
24	19	Actb	0.319801	0.0226665
24	20	Actb	0.348983	0.0485282
24	21	Actb	0.404359	0.100584
24	22	Actb	0.504025	0.196929
24	23	Actb	0.670012	0.359597
24	24	Actb	0.926801	0.613066
24	25	Actb	1.27656	0.959506
24	26	Actb	1.68898	1.3686
24	27	Actb	2.10944	1.78574
24	28	Actb	2.4807	2.15368
24	29	Actb	2.80243	2.4721
24	30	Actb	3.07233	2.73867
24	31	Actb	3.29614	2.95916
24	32	Actb	3.48289	3.14259
24	33	Actb	3.63918	3.29556
24	34	Actb	3.75311	3.40617
24	35	Actb	3.84243	3.49217
24	36	Actb	3.92655	3.57297
24	37	Actb	3.99231	3.63541
24	38	Actb	4.03404	3.67382
24	39	Actb	4.06403	3.70049
24	40	Actb	4.083	3.71614
25	1
25	2
25	3
25	4
25	5
25	6
25	7
25	8
25	9
25	10
25	11
25	12
25	13
25	14
25	15
25	16
25	17
25	18
25	19
25	20
25	21
25	22
25	23
25	24
25	25
25	26
25	27
25	28
25	29
25	30
25	31
25	32
25	33
25	34
25	35
25	36
25	37
25	38
25	39
25	40
26	1	Gadph	0.244417	-0.0078903
26	2	Gadph	0.247956	-0.00970092
26	3	Gadph	0.260224	-0.00278281
26	4	Gadph	0.267827	-0.000528818
26	5	Gadph	0.275872	0.00216581
26	6	Gadph	0.281341	0.00228521
26	7	Gadph	0.285774	0.0013689
26	8	Gadph	0.290418	0.000663495
26	9	Gadph	0.294669	-0.000434942
26	10	Gadph	0.298243	-0.00221052
26	11	Gadph	0.304173	-0.00163013
26	12	Gadph	0.310518	-0.000634714
26	13	Gadph	0.318241	0.00173852
26	14	Gadph	0.329744	0.0078915
26	15	Gadph	0.349524	0.0223221
26	16	Gadph	0.386952	0.0544009
26	17	Gadph	0.451615	0.113715
26	18	Gadph	0.572612	0.229362
26	19	Gadph	0.774721	0.426121
26	20	Gadph	1.0803	0.726346
26	21	Gadph	1.48067	1.12137
26	22	Gadph	1.93272	1.56807
26	23	Gadph	2.36731	1.99731
26	24	Gadph	2.74504	2.36969
26	25	Gadph	3.05467	2.67397
26	26	Gadph	3.30515	2.91911
26	27	Gadph	3.51167	3.12027
26	28	Gadph	3.67997	3.28322
26	29	Gadph	3.82481	3.42271
26	30	Gadph	3.937	3.52955
26	31	Gadph	4.04024	3.62744
26	32	Gadph	4.11698	3.69884
26	33	Gadph	4.17949	3.75599
26	34	Gadph	4.24221	3.81337
26	35	Gadph	4.29509	3.8609
26	36	Gadph	4.35057	3.91103
26	37	Gadph	4.39167	3.94678
26	38	Gadph	4.42609	3.97584
26	39	Gadph	4.44568	3.99009
26	40	Gadph	4.47271	4.01177
27	1	Gadph	0.270187	-0.0132879
27	2	Gadph	0.277539	-0.0113636
27	3	Gadph	0.290815	-0.00351636
27	4	Gadph	0.30018	0.000420491
27	5	Gadph	0.306754	0.00156549
27	6	Gadph	0.311899	0.00128295
27	7	Gadph	0.318074	0.00202952
27	8	Gadph	0.32238	0.000906855
27	9	Gadph	0.326295	-0.000606338
27	10	Gadph	0.332504	0.000173996
27	11	Gadph	0.335858	-0.00190029
27	12	Gadph	0.342054	-0.00113286
27	13	Gadph	0.349392	0.000776539
27	14	Gadph	0.360201	0.00615773
27	15	Gadph	0.379797	0.0203244
27	16	Gadph	0.415647	0.0507459
27	17	Gadph	0.480545	0.110216
27	18	Gadph	0.596412	0.220654
27	19	Gadph	0.794191	0.413006
27	20	Gadph	1.10142	0.714808
27	21	Gadph	1.52086	1.12882
27	22	Gadph	2.01043	1.61296
27	23	Gadph	2.49005	2.08715
27	24	Gadph	2.90438	2.49605
27	25	Gadph	3.23205	2.81829
27	26	Gadph	3.49537	3.07619
27	27	Gadph	3.70801	3.2834
27	28	Gadph	3.87534	3.4453
27	29	Gadph	4.02201	3.58654
27	30	Gadph	4.14243	3.70153
27	31	Gadph	4.24743	3.8011
27	32	Gadph	4.32999	3.87823
27	33	Gadph	4.40139	3.94421
27	34	Gadph	4.45732	3.99471
27	35	Gadph	4.51306	4.04502
27	36	Gadph	4.56583	4.09236
27	37	Gadph	4.60372	4.12483
27	38	Gadph	4.62844	4.14411
27	39	Gadph	4.65682	4.16706
27	40	Gadph	4.68071	4.18552
28	1
28	2
28	3
28	4
28	5
28	6
28	7
28	8
28	9
28	10
28	11
28	12
28	13
28	14
28	15
28	16
28	17
28	18
28	19
28	20
28	21
28	22
28	23
28	24
28	25
28	26
28	27
28	28
28	29
28	30
28	31
28	32
28	33
28	34
28	35
28	36
28	37
28	38
28	39
28	40
29	1
29	2
29	3
29	4
29	5
29	6
29	7
29	8
29	9
29	10
29	11
29	12
29	13
29	14
29	15
29	16
29	17
29	18
29	19
29	20
29	21
29	22
29	23
29	24
29	25
29	26
29	27
29	28
29	29
29	30
29	31
29	32
29	33
29	34
29	35
29	36
29	37
29	38
29	39
29	40
30	1
30	2
30	3
30	4
30	5
30	6
30	7
30	8
30	9
30	10
30	11
30	12
30	13
30	14
30	15
30	16
30	17
30	18
30	19
30	20
30	21
30	22
30	23
30	24
30	25
30	26
30	27
30	28
30	29
30	30
30	31
30	32
30	33
30	34
30	35
30	36
30	37
30	38
30	39
30	40
31	1	Gadph	0.241901	-0.0124984
31	2	Gadph	0.24883	-0.0110387
31	3	Gadph	0.261907	-0.00343161
31	4	Gadph	0.270297	-0.000511405
31	5	Gadph	0.277172	0.000894155
31	6	Gadph	0.284197	0.00244956
31	7	Gadph	0.290061	0.00284455
31	8	Gadph	0.294056	0.00136951
31	9	Gadph	0.297651	-0.00050524
31	10	Gadph	0.302176	-0.00144891
31	11	Gadph	0.308074	-0.00102098
31	12	Gadph	0.313678	-0.000886671
31	13	Gadph	0.320281	0.000247033
31	14	Gadph	0.330331	0.00482746
31	15	Gadph	0.348105	0.0171319
31	16	Gadph	0.380144	0.0437011
31	17	Gadph	0.438458	0.0965455
31	18	Gadph	0.544132	0.19675
31	19	Gadph	0.725306	0.372455
31	20	Gadph	1.01654	0.65822
31	21	Gadph	1.42716	1.06337
31	22	Gadph	1.92314	1.55388
31	23	Gadph	2.43122	2.05649
31	24	Gadph	2.88359	2.50339
31	25	Gadph	3.24845	2.86278
31	26	Gadph	3.53753	3.14639
31	27	Gadph	3.76406	3.36745
31	28	Gadph	3.95411	3.55203
31	29	Gadph	4.11399	3.70644
31	30	Gadph	4.23553	3.82251
31	31	Gadph	4.34668	3.9282
31	32	Gadph	4.43746	4.01351
31	33	Gadph	4.50487	4.07545
31	34	Gadph	4.57524	4.14035
31	35	Gadph	4.63723	4.19687
31	36	Gadph	4.68858	4.24275
31	37	Gadph	4.72627	4.27497
31	38	Gadph	4.7542	4.29742
31	39	Gadph	4.78618	4.32394
31	40	Gadph	4.81506	4.34734
32	1	Gadph	0.243158	-0.0133613
32	2	Gadph	0.250319	-0.0114675
32	3	Gadph	0.262611	-0.00444317
32	4	Gadph	0.272036	-0.000286242
32	5	Gadph	0.279201	0.00161179
32	6	Gadph	0.285317	0.00245992
32	7	Gadph	0.290659	0.00253462
32	8	Gadph	0.294938	0.001546
32	9	Gadph	0.298061	-0.000599034
32	10	Gadph	0.303509	-0.000418477
32	11	Gadph	0.308355	-0.00083933
32	12	Gadph	0.313749	-0.000713401
32	13	Gadph	0.318877	-0.000852682
32	14	Gadph	0.327307	0.00230963
32	15	Gadph	0.342377	0.0121122
32	16	Gadph	0.369839	0.0343061
32	17	Gadph	0.417472	0.0766716
32	18	Gadph	0.504478	0.158411
32	19	Gadph	0.656742	0.305407
32	20	Gadph	0.907267	0.550665
32	21	Gadph	1.27898	0.91711
32	22	Gadph	1.75503	1.38789
32	23	Gadph	2.27134	1.89894
32	24	Gadph	2.74322	2.36555
32	25	Gadph	3.1269	2.74396
32	26	Gadph	3.43523	3.04702
32	27	Gadph	3.68567	3.2922
32	28	Gadph	3.88794	3.4892
32	29	Gadph	4.05169	3.64768
32	30	Gadph	4.18176	3.77248
32	31	Gadph	4.29091	3.87636
32	32	Gadph	4.38236	3.96255
32	33	Gadph	4.45766	4.03258
32	34	Gadph	4.51926	4.08891
32	35	Gadph	4.57612	4.14051
32	36	Gadph	4.63031	4.18942
32	37	Gadph	4.67431	4.22816
32	38	Gadph	4.707	4.25558
32	39	Gadph	4.73604	4.27936
32	40	Gadph	4.74935	4.2874
33	1	Gadph	0.23523	-0.0134525
33	2	Gadph	0.241791	-0.0120453
33	3	Gadph	0.255303	-0.00368676
33	4	Gadph	0.264258	0.000113658
33	5	Gadph	0.270612	0.00131442
33	6	Gadph	0.276268	0.00181653
33	7	Gadph	0.281791	0.00218515
33	8	Gadph	0.285831	0.00107183
33	9	Gadph	0.290614	0.000701353
33	10	Gadph	0.293978	-0.00108911
33	11	Gadph	0.298315	-0.00190588
33	12	Gadph	0.303792	-0.00158276
33	13	Gadph	0.31159	0.00106157
33	14	Gadph	0.322952	0.00726963
33	15	Gadph	0.340084	0.0192483
33	16	Gadph	0.372997	0.0470076
33	17	Gadph	0.43161	0.100467
33	18	Gadph	0.537185	0.200888
33	19	Gadph	0.71742	0.375969
33	20	Gadph	1.00156	0.654954
33	21	Gadph	1.39574	1.04398
33	22	Gadph	1.86735	1.51044
33	23	Gadph	2.34565	1.98358
33	24	Gadph	2.75966	2.39244
33	25	Gadph	3.09155	2.71918
33	26	Gadph	3.36368	2.98615
33	27	Gadph	3.57592	3.19324
33	28	Gadph	3.75172	3.36389
33	29	Gadph	3.89678	3.50379
33	30	Gadph	4.01187	3.61373
33	31	Gadph	4.11374	3.71045
33	32	Gadph	4.19026	3.78181
33	33	Gadph	4.25128	3.83767
33	34	Gadph	4.31634	3.89758
33	35	Gadph	4.37059	3.94668
33	36	Gadph	4.4082	3.97914
33	37	Gadph	4.44424	4.01002
33	38	Gadph	4.47905	4.03968
33	39	Gadph	4.5009	4.05638
33	40	Gadph	4.51234	4.06266
34	1	Gadph	0.21133	-0.0346825
34	2	Gadph	0.218807	-0.029691
34	3	Gadph	0.232553	-0.0184309
34	4	Gadph	0.241654	-0.0118161
34	5	Gadph	0.248579	-0.00737689
34	6	Gadph	0.255138	-0.00330313
34	7	Gadph	0.260344	-0.000583274
34	8	Gadph	0.26358	0.000167065
34	9	Gadph	0.267694	0.00179502
34	10	Gadph	0.270477	0.00209213
34	11	Gadph	0.274776	0.00390513
34	12	Gadph	0.278472	0.00511588
34	13	Gadph	0.281392	0.00554966
34	14	Gadph	0.28393	0.00560197
34	15	Gadph	0.286316	0.00550292
34	16	Gadph	0.287608	0.00430848
34	17	Gadph	0.288544	0.00275879
34	18	Gadph	0.291467	0.00319582
34	19	Gadph	0.292942	0.00218576
34	20	Gadph	0.295057	0.00181476
34	21	Gadph	0.298741	0.0030124
34	22	Gadph	0.301519	0.00330492
34	23	Gadph	0.304072	0.00337219
34	24	Gadph	0.306327	0.00314138
34	25	Gadph	0.309551	0.00388015
34	26	Gadph	0.312083	0.00392588
34	27	Gadph	0.314625	0.003982
34	28	Gadph	0.315464	0.00233561
34	29	Gadph	0.31657	0.000955588
34	30	Gadph	0.319595	0.00149525
34	31	Gadph	0.321211	0.000624973
34	32	Gadph	0.323375	0.00030374
34	33	Gadph	0.326173	0.000615419
34	34	Gadph	0.325667	-0.00237589
34	35	Gadph	0.327343	-0.00318645
34	36	Gadph	0.32843	-0.00458501
34	37	Gadph	0.329921	-0.00558001
34	38	Gadph	0.330256	-0.00772991
34	39	Gadph	0.330497	-0.0099753
34	40	Gadph	0.329732	-0.0132264
35	1	Gadph	0.226409	-0.0323741
35	2	Gadph	0.231623	-0.0299536
35	3	Gadph	0.243592	-0.0207784
35	4	Gadph	0.253673	-0.0134912
35	5	Gadph	0.260835	-0.00912243
35	6	Gadph	0.267523	-0.00522788
35	7	Gadph	0.271947	-0.00359786
35	8	Gadph	0.27825	-8.77648e-05
35	9	Gadph	0.283624	0.00249262
35	10	Gadph	0.286617	0.00269108
35	11	Gadph	0.288905	0.00218571
35	12	Gadph	0.292455	0.00294198
35	13	Gadph	0.297339	0.00503316
35	14	Gadph	0.300987	0.00588745
35	15	Gadph	0.303348	0.00545422
35	16	Gadph	0.306851	0.0061635
35	17	Gadph	0.309533	0.00605169
35	18	Gadph	0.312339	0.00606446
35	19	Gadph	0.315543	0.00647517
35	20	Gadph	0.317457	0.00559539
35	21	Gadph	0.319251	0.00459607
35	22	Gadph	0.322945	0.00549593
35	23	Gadph	0.325781	0.00553787
35	24	Gadph	0.328067	0.00503106
35	25	Gadph	0.331119	0.00528934
35	26	Gadph	0.332586	0.00396213
35	27	Gadph	0.334576	0.00315897
35	28	Gadph	0.33744	0.00322922
35	29	Gadph	0.338746	0.00174129
35	30	Gadph	0.340983	0.00118465
35	31	Gadph	0.343064	0.000472
35	32	Gadph	0.344295	-0.00109067
35	33	Gadph	0.346581	-0.00159787
35	34	Gadph	0.348421	-0.00255118
35	35	Gadph	0.349345	-0.00442073
35	36	Gadph	0.350809	-0.00575112
35	37	Gadph	0.351163	-0.0081904
35	38	Gadph	0.352652	-0.0094955
35	39	Gadph	0.353609	-0.0113319
35	40	Gadph	0.354709	-0.0130253
36	1	Gadph	0.212029	-0.0317208
36	2	Gadph	0.218867	-0.0273058
36	3	Gadph	0.231145	-0.0174508
36	4	Gadph	0.240846	-0.0101725
36	5	Gadph	0.247262	-0.00617993
36	6	Gadph	0.252611	-0.00325353
36	7	Gadph	0.257015	-0.00127226
36	8	Gadph	0.261688	0.000977559
36	9	Gadph	0.265597	0.00246324
36	10	Gadph	0.269753	0.00419724
36	11	Gadph	0.271263	0.00328363
36	12	Gadph	0.273428	0.003026
36	13	Gadph	0.277036	0.00421116
36	14	Gadph	0.279672	0.00442434
36	15	Gadph	0.280991	0.00332042
36	16	Gadph	0.284342	0.00424808
36	17	Gadph	0.286714	0.00419749
36	18	Gadph	0.288604	0.00366395
36	19	Gadph	0.291611	0.00424826
36	20	Gadph	0.293462	0.00367645
36	21	Gadph	0.29474	0.00253152
36	22	Gadph	0.297133	0.00250131
36	23	Gadph	0.299918	0.00286353
36	24	Gadph	0.301428	0.00195001
36	25	Gadph	0.302922	0.00102102
36	26	Gadph	0.306253	0.00192983
36	27	Gadph	0.307485	0.000738309
36	28	Gadph	0.310615	0.00144609
36	29	Gadph	0.31428	0.00268728
36	30	Gadph	0.316367	0.00235213
36	31	Gadph	0.317702	0.00126415
36	32	Gadph	0.318197	-0.000664498
36	33	Gadph	0.319509	-0.00177537
36	34	Gadph	0.321808	-0.00189871
36	35	Gadph	0.322957	-0.00317275
36	36	Gadph	0.324997	-0.00355567
36	37	Gadph	0.326124	-0.00485162
36	38	Gadph	0.327097	-0.00630152
36	39	Gadph	0.329148	-0.00667377
36	40	Gadph	0.328687	-0.009558
37	1	Gadph	0.217398	-0.0138838
37	2	Gadph	0.224064	-0.0119668
37	3	Gadph	0.235906	-0.00487356
37	4	Gadph	0.244701	-0.000827258
37	5	Gadph	0.251441	0.0011637
37	6	Gadph	0.257076	0.00204903
37	7	Gadph	0.262408	0.00263241
37	8	Gadph	0.266018	0.00149318
37	9	Gadph	0.271294	0.00202091
37	10	Gadph	0.274906	0.000883505
37	11	Gadph	0.278757	-1.40854e-05
37	12	Gadph	0.281858	-0.00166266
37	13	Gadph	0.285629	-0.00264069
37	14	Gadph	0.292794	-0.000224472
37	15	Gadph	0.302285	0.00451776
37	16	Gadph	0.31927	0.016754
37	17	Gadph	0.349044	0.0417787
37	18	Gadph	0.405876	0.0938613
37	19	Gadph	0.505946	0.189182
37	20	Gadph	0.67371	0.352198
37	21	Gadph	0.933939	0.607678
37	22	Gadph	1.28892	0.957909
37	23	Gadph	1.70639	1.37063
37	24	Gadph	2.12631	1.7858
37	25	Gadph	2.4986	2.15335
37	26	Gadph	2.81482	2.46482
37	27	Gadph	3.06839	2.71364
37	28	Gadph	3.28125	2.92175
37	29	Gadph	3.45591	3.09166
37	30	Gadph	3.59438	3.22537
37	31	Gadph	3.72168	3.34793
37	32	Gadph	3.81921	3.44071
37	33	Gadph	3.90349	3.52024
37	34	Gadph	3.96732	3.57932
37	35	Gadph	4.01791	3.62516
37	36	Gadph	4.0773	3.67981
37	37	Gadph	4.12349	3.72124
37	38	Gadph	4.1496	3.74261
37	39	Gadph	4.17316	3.76142
37	40	Gadph	4.20038	3.78389
38	1	Gadph	0.226785	-0.0125489
38	2	Gadph	0.23351	-0.0109061
38	3	Gadph	0.245461	-0.00403769
38	4	Gadph	0.255361	0.000780911
38	5	Gadph	0.262898	0.00323498
38	6	Gadph	0.266314	0.00156921
38	7	Gadph	0.270012	0.000184837
38	8	Gadph	0.275281	0.0003714
38	9	Gadph	0.280014	2.21769e-05
38	10	Gadph	0.284134	-0.000940288
38	11	Gadph	0.289441	-0.000715608
38	12	Gadph	0.294056	-0.001183
38	13	Gadph	0.299899	-0.000422233
38	14	Gadph	0.306539	0.0011353
38	15	Gadph	0.317287	0.00680128
38	16	Gadph	0.33821	0.0226424
38	17	Gadph	0.377384	0.0567333
38	18	Gadph	0.447182	0.121449
38	19	Gadph	0.571231	0.240416
38	20	Gadph	0.775109	0.439212
38	21	Gadph	1.08739	0.746413
38	22	Gadph	1.50226	1.1562
38	23	Gadph	1.96867	1.61753
38	24	Gadph	2.41562	2.05939
38	25	Gadph	2.80357	2.44226
38	26	Gadph	3.11524	2.74885
38	27	Gadph	3.37073	2.99926
38	28	Gadph	3.57679	3.20023
38	29	Gadph	3.74185	3.36022
38	30	Gadph	3.87443	3.48771
38	31	Gadph	3.99036	3.59855
38	32	Gadph	4.0894	3.69252
38	33	Gadph	4.16459	3.76262
38	34	Gadph	4.22954	3.82249
38	35	Gadph	4.27808	3.86595
38	36	Gadph	4.32331	3.90609
38	37	Gadph	4.36109	3.93879
38	38	Gadph	4.38523	3.95785
38	39	Gadph	4.40391	3.97145
38	40	Gadph	4.42031	3.98277
39	1	Gadph	0.232577	-0.0146957
39	2	Gadph	0.239534	-0.0127689
39	3	Gadph	0.25335	-0.00398304
39	4	Gadph	0.26195	-0.000412444
39	5	Gadph	0.268515	0.00112331
39	6	Gadph	0.274411	0.00198905
39	7	Gadph	0.279337	0.00188535
39	8	Gadph	0.28297	0.000488642
39	9	Gadph	0.288814	0.00130234
39	10	Gadph	0.294039	0.00149837
39	11	Gadph	0.296844	-0.000726636
39	12	Gadph	0.301227	-0.0013739
39	13	Gadph	0.305839	-0.00179103
39	14	Gadph	0.314658	0.0019984
39	15	Gadph	0.330196	0.0125059
39	16	Gadph	0.356517	0.0337978
39	17	Gadph	0.405051	0.0773018
39	18	Gadph	0.490168	0.157389
39	19	Gadph	0.641347	0.303538
39	20	Gadph	0.887267	0.544429
39	21	Gadph	1.24366	0.895788
39	22	Gadph	1.69406	1.34116
39	23	Gadph	2.17166	1.81373
39	24	Gadph	2.6117	2.24874
39	25	Gadph	2.97356	2.60557
39	26	Gadph	3.27711	2.9041
39	27	Gadph	3.51566	3.13761
39	28	Gadph	3.71015	3.32707
39	29	Gadph	3.86582	3.47771
39	30	Gadph	3.99761	3.60447
39	31	Gadph	4.10289	3.70473
39	32	Gadph	4.18631	3.78311
39	33	Gadph	4.25336	3.84513
39	34	Gadph	4.31375	3.90049
39	35	Gadph	4.36467	3.94639
39	36	Gadph	4.40684	3.98352
39	37	Gadph	4.43751	4.00917
39	38	Gadph	4.45983	4.02646
39	39	Gadph	4.47511	4.03671
39	40	Gadph	4.47811	4.03467
40	1	Gadph	0.235122	-0.0132334
40	2	Gadph	0.242109	-0.0111176
40	3	Gadph	0.253122	-0.00497492
40	4	Gadph	0.2619	-0.00106794
40	5	Gadph	0.269608	0.00176974
40	6	Gadph	0.275251	0.00254221
40	7	Gadph	0.280063	0.00248328
40	8	Gadph	0.285037	0.00258618
40	9	Gadph	0.288933	0.00161158
40	10	Gadph	0.292076	-0.000116159
40	11	Gadph	0.294831	-0.00223198
40	12	Gadph	0.299876	-0.00205729
40	13	Gadph	0.30626	-0.000544712
40	14	Gadph	0.316731	0.00505585
40	15	Gadph	0.33301	0.0164642
40	16	Gadph	0.360383	0.0389666
40	17	Gadph	0.411513	0.0852257
40	18	Gadph	0.50531	0.174152
40	19	Gadph	0.669007	0.332978
40	20	Gadph	0.933834	0.592935
40	21	Gadph	1.31534	0.969565
40	22	Gadph	1.78695	1.43631
40	23	Gadph	2.2837	1.92819
40	24	Gadph	2.72991	2.36952
40	25	Gadph	3.09848	2.73323
40	26	Gadph	3.39752	3.0274
40	27	Gadph	3.63554	3.26055
40	28	Gadph	3.82935	3.44948
40	29	Gadph	3.98633	3.60159
40	30	Gadph	4.11701	3.72741
40	31	Gadph	4.21282	3.81834
40	32	Gadph	4.29528	3.89594
40	33	Gadph	4.3671	3.96289
40	34	Gadph	4.42294	4.01385
40	35	Gadph	4.46972	4.05576
40	36	Gadph	4.51096	4.09213
40	37	Gadph	4.54745	4.12375
40	38	Gadph	4.57171	4.14314
40	39	Gadph	4.58264	4.1492
40	40	Gadph	4.58765	4.14933
41	1
41	2
41	3
41	4
41	5
41	6
41	7
41	8
41	9
41	10
41	11
41	12
41	13
41	14
41	15
41	16
41	17
41	18
41	19
41	20
41	21
41	22
41	23
41	24
41	25
41	26
41	27
41	28
41	29
41	30
41	31
41	32
41	33
41	34
41	35
41	36
41	37
41	38
41	39
41	40
42	1	Gadph	0.220911	-0.00987629
42	2	Gadph	0.227027	-0.00899732
42	3	Gadph	0.239502	-0.00176041
42	4	Gadph	0.246794	0.000293769
42	5	Gadph	0.252239	0.000501634
42	6	Gadph	0.258792	0.00181646
42	7	Gadph	0.262945	0.000731994
42	8	Gadph	0.266937	-0.000513525
42	9	Gadph	0.272705	1.73823e-05
42	10	Gadph	0.277705	-0.000220252
42	11	Gadph	0.281877	-0.00128597
42	12	Gadph	0.287971	-0.000429298
42	13	Gadph	0.294486	0.000848217
42	14	Gadph	0.305501	0.00662535
42	15	Gadph	0.324375	0.0202618
42	16	Gadph	0.360134	0.0507828
42	17	Gadph	0.423868	0.10928
42	18	Gadph	0.536861	0.217035
42	19	Gadph	0.732038	0.406975
42	20	Gadph	1.03252	0.702219
42	21	Gadph	1.44616	1.11062
42	22	Gadph	1.931	1.59023
42	23	Gadph	2.4091	2.06308
42	24	Gadph	2.82451	2.47326
42	25	Gadph	3.16044	2.80395
42	26	Gadph	3.41774	3.05601
42	27	Gadph	3.63271	3.26575
42	28	Gadph	3.79948	3.42728
42	29	Gadph	3.9339	3.55647
42	30	Gadph	4.0537	3.67103
42	31	Gadph	4.15193	3.76401
42	32	Gadph	4.23277	3.83961
42	33	Gadph	4.29438	3.89599
42	34	Gadph	4.34602	3.94239
42	35	Gadph	4.38512	3.97625
42	36	Gadph	4.42007	4.00597
42	37	Gadph	4.45287	4.03353
42	38	Gadph	4.4725	4.04792
42	39	Gadph	4.49753	4.06772
42	40	Gadph	4.50976	4.07471
43	1	Gadph	0.24149	-0.0143589
43	2	Gadph	0.247799	-0.0128051
43	3	Gadph	0.260775	-0.00458404
43	4	Gadph	0.269623	-0.000491524
43	5	Gadph	0.276627	0.00175786
43	6	Gadph	0.282387	0.00276235
43	7	Gadph	0.286869	0.00248986
43	8	Gadph	0.289966	0.000830764
43	9	Gadph	0.294372	0.000481806
43	10	Gadph	0.298612	-3.32702e-05
43	11	Gadph	0.302203	-0.00119699
43	12	Gadph	0.306494	-0.00166167
43	13	Gadph	0.312555	-0.000355143
43	14	Gadph	0.321696	0.00402988
43	15	Gadph	0.336096	0.0136752
43	16	Gadph	0.361603	0.0344268
43	17	Gadph	0.406803	0.0748713
43	18	Gadph	0.489609	0.152923
43	19	Gadph	0.637099	0.295658
43	20	Gadph	0.880307	0.534111
43	21	Gadph	1.24546	0.894505
43	22	Gadph	1.71607	1.36037
43	23	Gadph	2.23908	1.87862
43	24	Gadph	2.7247	2.35948
43	25	Gadph	3.12279	2.75282
43	26	Gadph	3.45521	3.08048
43	27	Gadph	3.72588	3.3464
43	28	Gadph	3.93772	3.55348
43	29	Gadph	4.11005	3.72105
43	30	Gadph	4.24811	3.85436
43	31	Gadph	4.36857	3.97007
43	32	Gadph	4.46554	4.06228
43	33	Gadph	4.54419	4.13617
43	34	Gadph	4.61144	4.19867
43	35	Gadph	4.66389	4.24637
43	36	Gadph	4.70425	4.28197
43	37	Gadph	4.74828	4.32124
43	38	Gadph	4.79505	4.36326
43	39	Gadph	4.8223	4.38575
43	40	Gadph	4.83437	4.39307
44	1
44	2
44	3
44	4
44	5
44	6
44	7
44	8
44	9
44	10
44	11
44	12
44	13
44	14
44	15
44	16
44	17
44	18
44	19
44	20
44	21
44	22
44	23
44	24
44	25
44	26
44	27
44	28
44	29
44	30
44	31
44	32
44	33
44	34
44	35
44	36
44	37
44	38
44	39
44	40
45	1	Gadph	0.218269	-0.0138862
45	2	Gadph	0.224748	-0.0121293
45	3	Gadph	0.235969	-0.00563023
45	4	Gadph	0.244935	-0.00138506
45	5	Gadph	0.25298	0.00193794
45	6	Gadph	0.259483	0.00371885
45	7	Gadph	0.262967	0.00248215
45	8	Gadph	0.267641	0.00243442
45	9	Gadph	0.270712	0.000783857
45	10	Gadph	0.275053	0.000402606
45	11	Gadph	0.278529	-0.000843091
45	12	Gadph	0.281604	-0.00248975
45	13	Gadph	0.287403	-0.0014117
45	14	Gadph	0.297677	0.0041401
45	15	Gadph	0.313764	0.0155057
45	16	Gadph	0.338773	0.035793
45	17	Gadph	0.385011	0.0773094
45	18	Gadph	0.47276	0.160337
45	19	Gadph	0.6255	0.308355
45	20	Gadph	0.871509	0.549642
45	21	Gadph	1.22876	0.902177
45	22	Gadph	1.67681	1.3455
45	23	Gadph	2.15461	1.81858
45	24	Gadph	2.58913	2.24838
45	25	Gadph	2.93835	2.59288
45	26	Gadph	3.2339	2.8837
45	27	Gadph	3.4651	3.11018
45	28	Gadph	3.66232	3.30268
45	29	Gadph	3.81984	3.45548
45	30	Gadph	3.94466	3.57558
45	31	Gadph	4.04838	3.67457
45	32	Gadph	4.13566	3.75713
45	33	Gadph	4.20701	3.82377
45	34	Gadph	4.2665	3.87854
45	35	Gadph	4.31736	3.92467
45	36	Gadph	4.36338	3.96596
45	37	Gadph	4.40111	3.99898
45	38	Gadph	4.43485	4.02799
45	39	Gadph	4.45845	4.04687
45	40	Gadph	4.4724	4.05611
46	1	Gadph	0.1986	-0.0111353
46	2	Gadph	0.20439	-0.00955324
46	3	Gadph	0.215452	-0.00269887
46	4	Gadph	0.222943	0.000584077
46	5	Gadph	0.227793	0.00122664
46	6	Gadph	0.232019	0.00124421
46	7	Gadph	0.235451	0.000468291
46	8	Gadph	0.240483	0.00129307
46	9	Gadph	0.244422	0.00102359
46	10	Gadph	0.247899	0.000293124
46	11	Gadph	0.248988	-0.00282568
46	12	Gadph	0.253042	-0.00297967
46	13	Gadph	0.260192	-3.72089e-05
46	14	Gadph	0.266846	0.00240841
46	15	Gadph	0.278327	0.00968159
46	16	Gadph	0.301527	0.0286738
46	17	Gadph	0.341806	0.0647452
46	18	Gadph	0.416738	0.135469
46	19	Gadph	0.550149	0.264672
46	20	Gadph	0.765899	0.476215
46	21	Gadph	1.08317	0.789281
46	22	Gadph	1.48997	1.19187
46	23	Gadph	1.93403	1.63173
46	24	Gadph	2.35543	2.04891
46	25	Gadph	2.70199	2.39126
46	26	Gadph	2.98765	2.67272
46	27	Gadph	3.21777	2.89863
46	28	Gadph	3.40453	3.08118
46	29	Gadph	3.55311	3.22556
46	30	Gadph	3.67193	3.34017
46	31	Gadph	3.76156	3.42559
46	32	Gadph	3.84141	3.50123
46	33	Gadph	3.90643	3.56204
46	34	Gadph	3.96014	3.61154
46	35	Gadph	4.00767	3.65487
46	36	Gadph	4.03657	3.67956
46	37	Gadph	4.06451	3.70329
46	38	Gadph	4.08158	3.71615
46	39	Gadph	4.10641	3.73678
46	40	Gadph	4.11485	3.74101
47	1	Gadph	0.226169	-0.0121767
47	2	Gadph	0.233104	-0.0098889
47	3	Gadph	0.243992	-0.00364723
47	4	Gadph	0.251987	-0.000298819
47	5	Gadph	0.257132	0.000199144
47	6	Gadph	0.263965	0.0023855
47	7	Gadph	0.269505	0.00327882
47	8	Gadph	0.272689	0.00181549
47	9	Gadph	0.275408	-0.000112006
47	10	Gadph	0.279953	-0.000213249
47	11	Gadph	0.283079	-0.00173487
47	12	Gadph	0.287334	-0.00212654
47	13	Gadph	0.293364	-0.000742608
47	14	Gadph	0.29995	0.00119636
47	15	Gadph	0.312327	0.00892606
47	16	Gadph	0.335418	0.027371
47	17	Gadph	0.380374	0.0676796
47	18	Gadph	0.460583	0.143243
47	19	Gadph	0.602123	0.280135
47	20	Gadph	0.837452	0.510818
47	21	Gadph	1.1937	0.862415
47	22	Gadph	1.66399	1.32806
47	23	Gadph	2.1892	1.84863
47	24	Gadph	2.68605	2.34083
47	25	Gadph	3.10471	2.75484
47	26	Gadph	3.44162	3.0871
47	27	Gadph	3.70756	3.3484
47	28	Gadph	3.92203	3.55822
47	29	Gadph	4.10173	3.73327
47	30	Gadph	4.2489	3.87579
47	31	Gadph	4.36755	3.98981
47	32	Gadph	4.45469	4.0723
47	33	Gadph	4.53658	4.14954
47	34	Gadph	4.60731	4.21562
47	35	Gadph	4.67575	4.27941
47	36	Gadph	4.72089	4.31991
47	37	Gadph	4.76715	4.36152
47	38	Gadph	4.81803	4.40775
47	39	Gadph	4.84832	4.43339
47	40	Gadph	4.87122	4.45165
48	1	Gadph	0.207534	-0.0123119
48	2	Gadph	0.214146	-0.00995421
48	3	Gadph	0.224895	-0.00346014
48	4	Gadph	0.232405	-0.000203535
48	5	Gadph	0.237285	0.000421781
48	6	Gadph	0.242754	0.00163665
48	7	Gadph	0.247966	0.00259407
48	8	Gadph	0.251531	0.00190502
48	9	Gadph	0.254124	0.000243758
48	10	Gadph	0.257033	-0.00110217
48	11	Gadph	0.261953	-0.000436324
48	12	Gadph	0.266393	-0.000250264
48	13	Gadph	0.269517	-0.0013815
48	14	Gadph	0.275185	3.26572e-05
48	15	Gadph	0.286895	0.00748813
48	16	Gadph	0.306723	0.0230619
48	17	Gadph	0.342379	0.054464
48	18	Gadph	0.410247	0.118078
48	19	Gadph	0.527839	0.231415
48	20	Gadph	0.731966	0.431288
48	21	Gadph	1.05107	0.746133
48	22	Gadph	1.48457	1.17538
48	23	Gadph	1.98981	1.67637
48	24	Gadph	2.49228	2.17459
48	25	Gadph	2.929	2.60705
48	26	Gadph	3.2812	2.955
48	27	Gadph	3.56828	3.23782
48	28	Gadph	3.79672	3.46201
48	29	Gadph	3.98452	3.64555
48	30	Gadph	4.1312	3.78798
48	31	Gadph	4.25891	3.91144
48	32	Gadph	4.36092	4.00919
48	33	Gadph	4.45285	4.09686
48	34	Gadph	4.5303	4.17006
48	35	Gadph	4.59613	4.23164
48	36	Gadph	4.6508	4.28205
48	37	Gadph	4.68911	4.31611
48	38	Gadph	4.733	4.35574
48	39	Gadph	4.75783	4.37632
48	40	Gadph	4.78734	4.40157
49	1
49	2
49	3
49	4
49	5
49	6
49	7
49	8
49	9
49	10
49	11
49	12
49	13
49	14
49	15
49	16
49	17
49	18
49	19
49	20
49	21
49	22
49	23
49	24
49	25
49	26
49	27
49	28
49	29
49	30
49	31
49	32
49	33
49	34
49	35
49	36
49	37
49	38
49	39
49	40
50	1	Sdha	0.189907	-0.0180582
50	2	Sdha	0.195416	-0.0157846
50	3	Sdha	0.207169	-0.00726796
50	4	Sdha	0.215443	-0.00222983
50	5	Sdha	0.220878	-3.04666e-05
50	6	Sdha	0.226298	0.00215364
50	7	Sdha	0.229988	0.00260802
50	8	Sdha	0.233577	0.00296132
50	9	Sdha	0.236772	0.0029201
50	10	Sdha	0.240931	0.00384357
50	11	Sdha	0.242667	0.0023436
50	12	Sdha	0.244502	0.000942777
50	13	Sdha	0.245817	-0.00097764
50	14	Sdha	0.24847	-0.00156013
50	15	Sdha	0.251426	-0.00184018
50	16	Sdha	0.254415	-0.00208724
50	17	Sdha	0.257958	-0.00177959
50	18	Sdha	0.267069	0.00409534
50	19	Sdha	0.282796	0.0165863
50	20	Sdha	0.310087	0.0406416
50	21	Sdha	0.360098	0.0874175
50	22	Sdha	0.45118	0.175263
50	23	Sdha	0.604283	0.325131
50	24	Sdha	0.850446	0.568058
50	25	Sdha	1.19772	0.912099
50	26	Sdha	1.61729	1.32843
50	27	Sdha	2.04669	1.7546
50	28	Sdha	2.42596	2.13063
50	29	Sdha	2.74134	2.44277
50	30	Sdha	3.00149	2.69968
50	31	Sdha	3.20639	2.90135
50	32	Sdha	3.37036	3.06208
50	33	Sdha	3.51325	3.20174
50	34	Sdha	3.6193	3.30455
50	35	Sdha	3.71469	3.39671
50	36	Sdha	3.79086	3.46964
50	37	Sdha	3.85145	3.527
[truncated: 13,363 more rows]

## Sheet: Results Slc17a7
Experiment Type	Comparative Cт (ΔΔCт)
Instrument Type	QuantStudio(TM) 6 Flex System
Well	Well Position	Sample Name	Target Name	Reporter	RQ	RQ Min	RQ Max	CT	Ct Mean	Ct SD	Delta Ct	Delta Ct Mean	Delta Ct SE	Delta Delta Ct	Automatic Ct Threshold	Tm1	Ct Threshold	Tm2	Automatic Baseline	Tm3	Baseline Start	Baseline End	Comments	MTP
2	A2	wt 1-17	Actb	SYBR				22.5051	22.4755	0.0418704					TRUE	82.2877	0.261885		TRUE		1	40		N
3	A3	wt 1-17	Actb	SYBR				22.4459	22.4755	0.0418704					TRUE	82.4193	0.261885		TRUE		1	40		N
7	A7	wt 1-22	Actb	SYBR				22.1872	22.3295	0.201202					TRUE	82.4193	0.261885		TRUE		1	40		N
9	A9	wt 1-22	Actb	SYBR				22.4718	22.3295	0.201202					TRUE	82.4193	0.261885		TRUE		1	40		N
13	A13	wt Z3R	Actb	SYBR				22.8642	22.9731	0.0942769					TRUE	82.5508	0.261885		TRUE		1	40		N
14	A14	wt Z3R	Actb	SYBR				23.0285	22.9731	0.0942769					TRUE	82.5508	0.261885		TRUE		1	40		N
15	A15	wt Z3R	Actb	SYBR				23.0264	22.9731	0.0942769					TRUE	82.4193	0.261885		TRUE		1	40		N
16	A16	wt 3-2	Actb	SYBR				21.9771	22.1969	0.225168					TRUE	82.4193	0.261885		TRUE		1	40		N
17	A17	wt 3-2	Actb	SYBR				22.4271	22.1969	0.225168					TRUE	82.4193	0.261885		TRUE		1	40		N
18	A18	wt 3-2	Actb	SYBR				22.1867	22.1969	0.225168					TRUE	82.4193	0.261885		TRUE		1	40		N
19	A19	wt 3-3	Actb	SYBR				21.7088	21.8407	0.115319					TRUE	82.4193	0.261885		TRUE		1	40		N
20	A20	wt 3-3	Actb	SYBR				21.9223	21.8407	0.115319					TRUE	82.4193	0.261885		TRUE		1	40		N
21	A21	wt 3-3	Actb	SYBR				21.8911	21.8407	0.115319					TRUE	82.2877	0.261885		TRUE		1	40		N
22	A22	wt 4-3	Actb	SYBR				22.7059	22.4907	0.22305					TRUE	82.2877	0.261885		TRUE		1	40		N
23	A23	wt 4-3	Actb	SYBR				22.5056	22.4907	0.22305					TRUE	82.4193	0.261885		TRUE		1	40		N
24	A24	wt 4-3	Actb	SYBR				22.2606	22.4907	0.22305					TRUE	82.2877	0.261885		TRUE		1	40		N
25	B1	wt 1-17	Gadph	SYBR				19.461	19.2611	0.194083					TRUE	82.6824	0.393162		TRUE		1	40		N
26	B2	wt 1-17	Gadph	SYBR				19.0734	19.2611	0.194083					TRUE	82.6824	0.393162		TRUE		1	40		N
27	B3	wt 1-17	Gadph	SYBR				19.2488	19.2611	0.194083					TRUE	82.6824	0.393162		TRUE		1	40		N
31	B7	wt 1-22	Gadph	SYBR				19.5838	19.4367	0.132341					TRUE	82.814	0.393162		TRUE		1	40		N
32	B8	wt 1-22	Gadph	SYBR				19.3989	19.4367	0.132341					TRUE	82.814	0.393162		TRUE		1	40		N
33	B9	wt 1-22	Gadph	SYBR				19.3274	19.4367	0.132341					TRUE	82.9455	0.393162		TRUE		1	40		N
38	B14	wt Z3R	Gadph	SYBR				19.4987	19.4995	0.00117202					TRUE	82.9455	0.393162		TRUE		1	40		N
39	B15	wt Z3R	Gadph	SYBR				19.5003	19.4995	0.00117202					TRUE	82.814	0.393162		TRUE		1	40		N
40	B16	wt 3-2	Gadph	SYBR				19.2095	19.5287	0.451349					TRUE	82.814	0.393162		TRUE		1	40		N
41	B17	wt 3-2	Gadph	SYBR				19.8478	19.5287	0.451349					TRUE	82.6824	0.393162		TRUE		1	40		N
43	B19	wt 3-3	Gadph	SYBR				18.9628	18.7931	0.162969					TRUE	82.814	0.393162		TRUE		1	40		N
44	B20	wt 3-3	Gadph	SYBR				18.7788	18.7931	0.162969					TRUE	82.814	0.393162		TRUE		1	40		N
45	B21	wt 3-3	Gadph	SYBR				18.6378	18.7931	0.162969					TRUE	82.814	0.393162		TRUE		1	40		N
46	B22	wt 4-3	Gadph	SYBR				19.2917	19.3396	0.0422747					TRUE	82.814	0.393162		TRUE		1	40		N
47	B23	wt 4-3	Gadph	SYBR				19.3551	19.3396	0.0422747					TRUE	82.814	0.393162		TRUE		1	40		N
48	B24	wt 4-3	Gadph	SYBR				19.3719	19.3396	0.0422747					TRUE	82.814	0.393162		TRUE		1	40		N
49	C1	wt 1-17	Sdha	SYBR				23.4688	23.4028	0.0988755					TRUE	85.5768	0.311665		TRUE		1	40		N
50	C2	wt 1-17	Sdha	SYBR				23.2891	23.4028	0.0988755					TRUE	85.5768	0.311665		TRUE		1	40		N
51	C3	wt 1-17	Sdha	SYBR				23.4505	23.4028	0.0988755					TRUE	85.5768	0.311665		TRUE		1	40		N
55	C7	wt 1-22	Sdha	SYBR				23.3893	23.2667	0.10638					TRUE	85.5768	0.311665		TRUE		1	40		N
56	C8	wt 1-22	Sdha	SYBR				23.2117	23.2667	0.10638					TRUE	85.5768	0.311665		TRUE		1	40		N
57	C9	wt 1-22	Sdha	SYBR				23.1991	23.2667	0.10638					TRUE	85.5768	0.311665		TRUE		1	40		N
61	C13	wt Z3R	Sdha	SYBR				23.2045	23.2546	0.0436744					TRUE	85.7084	0.311665		TRUE		1	40		N
62	C14	wt Z3R	Sdha	SYBR				23.2847	23.2546	0.0436744					TRUE	85.5768	0.311665		TRUE		1	40		N
63	C15	wt Z3R	Sdha	SYBR				23.2747	23.2546	0.0436744					TRUE	85.5768	0.311665		TRUE		1	40		N
64	C16	wt 3-2	Sdha	SYBR				23.035	22.9791	0.050595					TRUE	85.5768	0.311665		TRUE		1	40		N
65	C17	wt 3-2	Sdha	SYBR				22.9657	22.9791	0.050595					TRUE	85.5768	0.311665		TRUE		1	40		N
66	C18	wt 3-2	Sdha	SYBR				22.9365	22.9791	0.050595					TRUE	85.5768	0.311665		TRUE		1	40		N
67	C19	wt 3-3	Sdha	SYBR				22.4079	22.4873	0.112266					TRUE	85.5768	0.311665		TRUE		1	40		N
69	C21	wt 3-3	Sdha	SYBR				22.5667	22.4873	0.112266					TRUE	85.4452	0.311665		TRUE		1	40		N
70	C22	wt 4-3	Sdha	SYBR				23.2094	23.1766	0.0463993					TRUE	85.4452	0.311665		TRUE		1	40		N
71	C23	wt 4-3	Sdha	SYBR				23.1438	23.1766	0.0463993					TRUE	85.5768	0.311665		TRUE		1	40		N
170	H2	wt 1-17	Slc17a7	SYBR	1	0.877069	1.14016	20.9206	20.9054	0.0215886		-0.80776	0.0820629	0	TRUE	80.8405	0.35548		TRUE		1	40		N
171	H3	wt 1-17	Slc17a7	SYBR	1	0.877069	1.14016	20.8901	20.9054	0.0215886		-0.80776	0.0820629	0	TRUE	80.8405	0.35548		TRUE		1	40		N
175	H7	wt 1-22	Slc17a7	SYBR	1.02068	0.841058	1.23865	20.7255	20.8403	0.14845		-0.837285	0.123443	-0.0295251	TRUE	80.8405	0.35548		TRUE		1	40		N
176	H8	wt 1-22	Slc17a7	SYBR	1.02068	0.841058	1.23865	20.7875	20.8403	0.14845		-0.837285	0.123443	-0.0295251	TRUE	80.8405	0.35548		TRUE		1	40		N
177	H9	wt 1-22	Slc17a7	SYBR	1.02068	0.841058	1.23865	21.008	20.8403	0.14845		-0.837285	0.123443	-0.0295251	TRUE	80.8405	0.35548		TRUE		1	40		N
181	H13	wt Z3R	Slc17a7	SYBR	0.836653	0.712517	0.982415	21.5208	21.3586	0.164787		-0.550461	0.102426	0.2573	TRUE	80.7089	0.35548		TRUE		1	40		N
182	H14	wt Z3R	Slc17a7	SYBR	0.836653	0.712517	0.982415	21.1914	21.3586	0.164787		-0.550461	0.102426	0.2573	TRUE	80.7089	0.35548		TRUE		1	40		N
183	H15	wt Z3R	Slc17a7	SYBR	0.836653	0.712517	0.982415	21.3636	21.3586	0.164787		-0.550461	0.102426	0.2573	TRUE	80.7089	0.35548		TRUE		1	40		N
184	H16	wt 3-2	Slc17a7	SYBR	0.667734	0.484678	0.919929	21.4559	21.3431	0.15943		-0.225106	0.200454	0.582654	TRUE	80.7089	0.35548		TRUE		1	40		N
186	H18	wt 3-2	Slc17a7	SYBR	0.667734	0.484678	0.919929	21.2304	21.3431	0.15943		-0.225106	0.200454	0.582654	TRUE	80.7089	0.35548		TRUE		1	40		N
187	H19	wt 3-3	Slc17a7	SYBR	0.669288	0.568605	0.787799	20.7986	20.8119	0.112723		-0.228459	0.103972	0.579301	TRUE	80.7089	0.35548		TRUE		1	40		N
188	H20	wt 3-3	Slc17a7	SYBR	0.669288	0.568605	0.787799	20.9307	20.8119	0.112723		-0.228459	0.103972	0.579301	TRUE	80.7089	0.35548		TRUE		1	40		N
189	H21	wt 3-3	Slc17a7	SYBR	0.669288	0.568605	0.787799	20.7065	20.8119	0.112723		-0.228459	0.103972	0.579301	TRUE	80.7089	0.35548		TRUE		1	40		N
190	H22	wt 4-3	Slc17a7	SYBR	0.902113	0.782358	1.0402	21.0778	21.0098	0.0590839		-0.65914	0.0908333	0.14862	TRUE	80.7089	0.35548		TRUE		1	40		N
191	H23	wt 4-3	Slc17a7	SYBR	0.902113	0.782358	1.0402	20.9709	21.0098	0.0590839		-0.65914	0.0908333	0.14862	TRUE	80.7089	0.35548		TRUE		1	40		N
192	H24	wt 4-3	Slc17a7	SYBR	0.902113	0.782358	1.0402	20.9807	21.0098	0.0590839		-0.65914	0.0908333	0.14862	TRUE	80.8405	0.35548		TRUE		1	40		N
196	I4	het 1-16	Actb	SYBR				21.0088	20.9711	0.122392					TRUE	82.5508	0.261885		TRUE		1	40		N
197	I5	het 1-16	Actb	SYBR				21.0702	20.9711	0.122392					TRUE	82.5508	0.261885		TRUE		1	40		N
198	I6	het 1-16	Actb	SYBR				20.8343	20.9711	0.122392					TRUE	82.5508	0.261885		TRUE		1	40		N
199	I7	het 1-19	Actb	SYBR				23.4076	23.3266	0.0862074					TRUE	82.5508	0.261885		TRUE		1	40		N
200	I8	het 1-19	Actb	SYBR				23.236	23.3266	0.0862074					TRUE	82.5508	0.261885		TRUE		1	40		N
201	I9	het 1-19	Actb	SYBR				23.3362	23.3266	0.0862074					TRUE	82.5508	0.261885		TRUE		1	40		N
202	I10	het Z1R	Actb	SYBR				20.9059	20.7849	0.178108					TRUE	82.5508	0.261885		TRUE		1	40		N
203	I11	het Z1R	Actb	SYBR				20.8683	20.7849	0.178108					TRUE	82.5508	0.261885		TRUE		1	40		N
204	I12	het Z1R	Actb	SYBR				20.5804	20.7849	0.178108					TRUE	82.5508	0.261885		TRUE		1	40		N
205	I13	het Z5R	Actb	SYBR				22.118	21.9519	0.16605					TRUE	82.5508	0.261885		TRUE		1	40		N
206	I14	het Z5R	Actb	SYBR				21.9516	21.9519	0.16605					TRUE	82.5508	0.261885		TRUE		1	40		N
207	I15	het Z5R	Actb	SYBR				21.7859	21.9519	0.16605					TRUE	82.6824	0.261885		TRUE		1	40		N
208	I16	het 3-1	Actb	SYBR				21.5631	21.4056	0.138058					TRUE	82.5508	0.261885		TRUE		1	40		N
209	I17	het 3-1	Actb	SYBR				21.3058	21.4056	0.138058					TRUE	82.5508	0.261885		TRUE		1	40		N
210	I18	het 3-1	Actb	SYBR				21.3478	21.4056	0.138058					TRUE	82.5508	0.261885		TRUE		1	40		N
211	I19	het 4-1	Actb	SYBR				21.7742	21.7474	0.0369322					TRUE	82.5508	0.261885		TRUE		1	40		N
212	I20	het 4-1	Actb	SYBR				21.7052	21.7474	0.0369322					TRUE	82.5508	0.261885		TRUE		1	40		N
213	I21	het 4-1	Actb	SYBR				21.7626	21.7474	0.0369322					TRUE	82.5508	0.261885		TRUE		1	40		N
214	I22	het 4-2	Actb	SYBR				20.644	20.8142	0.240708					TRUE	82.5508	0.261885		TRUE		1	40		N
216	I24	het 4-2	Actb	SYBR				20.9844	20.8142	0.240708					TRUE	82.5508	0.261885		TRUE		1	40		N
220	J4	het 1-16	Gadph	SYBR				18.6383	18.5442	0.164411					TRUE	82.9455	0.393162		TRUE		1	40		N
221	J5	het 1-16	Gadph	SYBR				18.3544	18.5442	0.164411					TRUE	82.9455	0.393162		TRUE		1	40		N
222	J6	het 1-16	Gadph	SYBR				18.64	18.5442	0.164411					TRUE	82.9455	0.393162		TRUE		1	40		N
223	J7	het 1-19	Gadph	SYBR				20.6652	20.717	0.179486					TRUE	82.814	0.393162		TRUE		1	40		N
224	J8	het 1-19	Gadph	SYBR				20.9166	20.717	0.179486					TRUE	82.814	0.393162		TRUE		1	40		N
225	J9	het 1-19	Gadph	SYBR				20.569	20.717	0.179486					TRUE	82.814	0.393162		TRUE		1	40		N
226	J10	het Z1R	Gadph	SYBR				18.5386	18.3601	0.156617					TRUE	83.0771	0.393162		TRUE		1	40		N
227	J11	het Z1R	Gadph	SYBR				18.2957	18.3601	0.156617					TRUE	83.0771	0.393162		TRUE		1	40		N
228	J12	het Z1R	Gadph	SYBR				18.2459	18.3601	0.156617					TRUE	83.0771	0.393162		TRUE		1	40		N
229	J13	het Z5R	Gadph	SYBR				19.6546	19.4449	0.181718					TRUE	82.9455	0.393162		TRUE		1	40		N
230	J14	het Z5R	Gadph	SYBR				19.3467	19.4449	0.181718					TRUE	82.9455	0.393162		TRUE		1	40		N
231	J15	het Z5R	Gadph	SYBR				19.3334	19.4449	0.181718					TRUE	82.9455	0.393162		TRUE		1	40		N
232	J16	het 3-1	Gadph	SYBR				18.9349	18.8069	0.1128					TRUE	82.9455	0.393162		TRUE		1	40		N
233	J17	het 3-1	Gadph	SYBR				18.7638	18.8069	0.1128					TRUE	82.9455	0.393162		TRUE		1	40		N
234	J18	het 3-1	Gadph	SYBR				18.7221	18.8069	0.1128					TRUE	82.9455	0.393162		TRUE		1	40		N
236	J20	het 4-1	Gadph	SYBR				19.4474	19.5567	0.154612					TRUE	82.9455	0.393162		TRUE		1	40		N
237	J21	het 4-1	Gadph	SYBR				19.666	19.5567	0.154612					TRUE	82.9455	0.393162		TRUE		1	40		N
238	J22	het 4-2	Gadph	SYBR				18.517	18.4576	0.197101					TRUE	82.9455	0.393162		TRUE		1	40		N
239	J23	het 4-2	Gadph	SYBR				18.2376	18.4576	0.197101					TRUE	82.9455	0.393162		TRUE		1	40		N
240	J24	het 4-2	Gadph	SYBR				18.6181	18.4576	0.197101					TRUE	82.9455	0.393162		TRUE		1	40		N
244	K4	het 1-16	Sdha	SYBR				22.3464	22.349	0.0527038					TRUE	85.7084	0.311665		TRUE		1	40		N
245	K5	het 1-16	Sdha	SYBR				22.4029	22.349	0.0527038					TRUE	85.7084	0.311665		TRUE		1	40		N
246	K6	het 1-16	Sdha	SYBR				22.2976	22.349	0.0527038					TRUE	85.7084	0.311665		TRUE		1	40		N
247	K7	het 1-19	Sdha	SYBR				24.8022	24.8502	0.0492877					TRUE	85.7084	0.311665		TRUE		1	40		N
248	K8	het 1-19	Sdha	SYBR				24.8475	24.8502	0.0492877					TRUE	85.7084	0.311665		TRUE		1	40		N
249	K9	het 1-19	Sdha	SYBR				24.9007	24.8502	0.0492877					TRUE	85.7084	0.311665		TRUE		1	40		N
251	K11	het Z1R	Sdha	SYBR				21.3137	21.2134	0.141782					TRUE	85.8399	0.311665		TRUE		1	40		N
252	K12	het Z1R	Sdha	SYBR				21.1132	21.2134	0.141782					TRUE	85.8399	0.311665		TRUE		1	40		N
253	K13	het Z5R	Sdha	SYBR				22.7579	22.7542	0.00871615					TRUE	85.8399	0.311665		TRUE		1	40		N
254	K14	het Z5R	Sdha	SYBR				22.7604	22.7542	0.00871615					TRUE	85.8399	0.311665		TRUE		1	40		N
255	K15	het Z5R	Sdha	SYBR				22.7442	22.7542	0.00871615					TRUE	85.8399	0.311665		TRUE		1	40		N
257	K17	het 3-1	Sdha	SYBR				22.0695	22.1533	0.118614					TRUE	85.8399	0.311665		TRUE		1	40		N
258	K18	het 3-1	Sdha	SYBR				22.2372	22.1533	0.118614					TRUE	85.8399	0.311665		TRUE		1	40		N
259	K19	het 4-1	Sdha	SYBR				22.7153	22.6118	0.146323					TRUE	85.8399	0.311665		TRUE		1	40		N
261	K21	het 4-1	Sdha	SYBR				22.5084	22.6118	0.146323					TRUE	85.7084	0.311665		TRUE		1	40		N
262	K22	het 4-2	Sdha	SYBR				21.5349	21.4034	0.125261					TRUE	85.8399	0.311665		TRUE		1	40		N
263	K23	het 4-2	Sdha	SYBR				21.3896	21.4034	0.125261					TRUE	85.7084	0.311665		TRUE		1	40		N
264	K24	het 4-2	Sdha	SYBR				21.2856	21.4034	0.125261					TRUE	85.8399	0.311665		TRUE		1	40		N
364	P4	het 1-16	Slc17a7	SYBR	0.480442	0.428186	0.539076	20.919	20.8712	0.0417998		0.249806	0.0745581	1.05757	TRUE	80.7089	0.35548		TRUE		1	40		N
365	P5	het 1-16	Slc17a7	SYBR	0.480442	0.428186	0.539076	20.8536	20.8712	0.0417998		0.249806	0.0745581	1.05757	TRUE	80.7089	0.35548		TRUE		1	40		N
366	P6	het 1-16	Slc17a7	SYBR	0.480442	0.428186	0.539076	20.8411	20.8712	0.0417998		0.249806	0.0745581	1.05757	TRUE	80.7089	0.35548		TRUE		1	40		N
367	P7	het 1-19	Slc17a7	SYBR	0.643429	0.572305	0.723391	22.7629	22.7929	0.0425636		-0.171612	0.0747058	0.636148	TRUE	80.7089	0.35548		TRUE		1	40		N
368	P8	het 1-19	Slc17a7	SYBR	0.643429	0.572305	0.723391	22.823	22.7929	0.0425636		-0.171612	0.0747058	0.636148	TRUE	80.7089	0.35548		TRUE		1	40		N
370	P10	het Z1R	Slc17a7	SYBR	0.693591	0.56817	0.846699	19.8359	19.8395	0.141471		-0.279918	0.127208	0.527843	TRUE	80.8405	0.35548		TRUE		1	40		N
371	P11	het Z1R	Slc17a7	SYBR	0.693591	0.56817	0.846699	19.9828	19.8395	0.141471		-0.279918	0.127208	0.527843	TRUE	80.8405	0.35548		TRUE		1	40		N
372	P12	het Z1R	Slc17a7	SYBR	0.693591	0.56817	0.846699	19.6999	19.8395	0.141471		-0.279918	0.127208	0.527843	TRUE	80.8405	0.35548		TRUE		1	40		N
374	P14	het Z5R	Slc17a7	SYBR	0.681194	0.598247	0.775641	21.119	21.1297	0.0152363		-0.253897	0.0828081	0.553863	TRUE	80.8405	0.35548		TRUE		1	40		N
375	P15	het Z5R	Slc17a7	SYBR	0.681194	0.598247	0.775641	21.1405	21.1297	0.0152363		-0.253897	0.0828081	0.553863	TRUE	80.8405	0.35548		TRUE		1	40		N
376	P16	het 3-1	Slc17a7	SYBR	0.6126	0.543209	0.690855	20.6913	20.6878	0.00489443		-0.100778	0.0752113	0.706982	TRUE	80.8405	0.35548		TRUE		1	40		N
377	P17	het 3-1	Slc17a7	SYBR	0.6126	0.543209	0.690855	20.6844	20.6878	0.00489443		-0.100778	0.0752113	0.706982	TRUE	80.7089	0.35548		TRUE		1	40		N
379	P19	het 4-1	Slc17a7	SYBR	0.689568	0.566712	0.839057	20.9304	21.0338	0.165928		-0.271524	0.122756	0.536236	TRUE	80.7089	0.35548		TRUE		1	40		N
380	P20	het 4-1	Slc17a7	SYBR	0.689568	0.566712	0.839057	21.2252	21.0338	0.165928		-0.271524	0.122756	0.536236	TRUE	80.7089	0.35548		TRUE		1	40		N
381	P21	het 4-1	Slc17a7	SYBR	0.689568	0.566712	0.839057	20.9457	21.0338	0.165928		-0.271524	0.122756	0.536236	TRUE	80.7089	0.35548		TRUE		1	40		N
382	P22	het 4-2	Slc17a7	SYBR	0.718833	0.579541	0.891604	19.9753	19.8935	0.131952		-0.331489	0.137367	0.476271	TRUE	80.7089	0.35548		TRUE		1	40		N
383	P23	het 4-2	Slc17a7	SYBR	0.718833	0.579541	0.891604	19.964	19.8935	0.131952		-0.331489	0.137367	0.476271	TRUE	80.7089	0.35548		TRUE		1	40		N
384	P24	het 4-2	Slc17a7	SYBR	0.718833	0.579541	0.891604	19.7413	19.8935	0.131952		-0.331489	0.137367	0.476271	TRUE	80.7089	0.35548		TRUE		1	40		N
Analysis Type	Singleplex
Endogenous Control	Actb, Gadph, Sdha
RQ Min/Max Confidence Level	95.0
Reference Sample	wt 1-17

## Sheet: Amplification data Slc17a7
Experiment Type	Comparative Cт (ΔΔCт)
Instrument Type	QuantStudio(TM) 6 Flex System
Well	Cycle	Target Name	Rn	Delta Rn
1	1
1	2
1	3
1	4
1	5
1	6
1	7
1	8
1	9
1	10
1	11
1	12
1	13
1	14
1	15
1	16
1	17
1	18
1	19
1	20
1	21
1	22
1	23
1	24
1	25
1	26
1	27
1	28
1	29
1	30
1	31
1	32
1	33
1	34
1	35
1	36
1	37
1	38
1	39
1	40
2	1	Actb	0.322597	-0.0303147
2	2	Actb	0.334148	-0.0246376
2	3	Actb	0.351591	-0.0130684
2	4	Actb	0.364508	-0.00602461
2	5	Actb	0.376539	0.000132391
2	6	Actb	0.387598	0.0053176
2	7	Actb	0.396476	0.00832163
2	8	Actb	0.398945	0.00491664
2	9	Actb	0.404448	0.00454609
2	10	Actb	0.410679	0.00490276
2	11	Actb	0.415629	0.00397947
2	12	Actb	0.418937	0.001413
2	13	Actb	0.421555	-0.00184286
2	14	Actb	0.426442	-0.00282879
2	15	Actb	0.431397	-0.00374785
2	16	Actb	0.436472	-0.00454707
2	17	Actb	0.445423	-0.00146999
2	18	Actb	0.45697	0.004204
2	19	Actb	0.475107	0.0164669
2	20	Actb	0.507095	0.0425811
2	21	Actb	0.565875	0.0954873
2	22	Actb	0.664984	0.188723
2	23	Actb	0.82464	0.342504
2	24	Actb	1.05998	0.57197
2	25	Actb	1.35686	0.862977
2	26	Actb	1.68887	1.18911
2	27	Actb	2.00163	1.496
2	28	Actb	2.27545	1.76394
2	29	Actb	2.50615	1.98877
2	30	Actb	2.7007	2.17745
2	31	Actb	2.86302	2.3339
2	32	Actb	2.99557	2.46057
2	33	Actb	3.09587	2.55499
2	34	Actb	3.17638	2.62963
2	35	Actb	3.23584	2.68322
2	36	Actb	3.28382	2.72533
2	37	Actb	3.31905	2.75468
2	38	Actb	3.34262	2.77238
2	39	Actb	3.36002	2.7839
2	40	Actb	3.37034	2.78834
3	1	Actb	0.17885	-0.0164735
3	2	Actb	0.185683	-0.0129491
3	3	Actb	0.196478	-0.00546261
3	4	Actb	0.203049	-0.00220072
3	5	Actb	0.20926	0.000701936
3	6	Actb	0.214132	0.00226543
3	7	Actb	0.218672	0.00349683
3	8	Actb	0.221999	0.00351491
3	9	Actb	0.223047	0.00125402
3	10	Actb	0.226936	0.00183478
3	11	Actb	0.229042	0.000631784
3	12	Actb	0.231931	0.000212334
3	13	Actb	0.232528	-0.00249882
3	14	Actb	0.236055	-0.00228113
3	15	Actb	0.239477	-0.00216694
3	16	Actb	0.243538	-0.00141507
3	17	Actb	0.250375	0.00211326
3	18	Actb	0.26019	0.00861942
3	19	Actb	0.276472	0.0215933
3	20	Actb	0.306788	0.0486004
3	21	Actb	0.363462	0.101965
3	22	Actb	0.462543	0.197738
3	23	Actb	0.62253	0.354417
3	24	Actb	0.856567	0.585145
3	25	Actb	1.16237	0.887637
3	26	Actb	1.50207	1.22403
3	27	Actb	1.82997	1.54862
3	28	Actb	2.11576	1.8311
3	29	Actb	2.35367	2.0657
3	30	Actb	2.55542	2.26415
3	31	Actb	2.72003	2.42545
3	32	Actb	2.85803	2.56014
3	33	Actb	2.96591	2.66471
3	34	Actb	3.05245	2.74794
3	35	Actb	3.12062	2.8128
3	36	Actb	3.16846	2.85733
3	37	Actb	3.20276	2.88832
3	38	Actb	3.22857	2.91082
3	39	Actb	3.2393	2.91824
3	40	Actb	3.25299	2.92863
4	1
4	2
4	3
4	4
4	5
4	6
4	7
4	8
4	9
4	10
4	11
4	12
4	13
4	14
4	15
4	16
4	17
4	18
4	19
4	20
4	21
4	22
4	23
4	24
4	25
4	26
4	27
4	28
4	29
4	30
4	31
4	32
4	33
4	34
4	35
4	36
4	37
4	38
4	39
4	40
5	1
5	2
5	3
5	4
5	5
5	6
5	7
5	8
5	9
5	10
5	11
5	12
5	13
5	14
5	15
5	16
5	17
5	18
5	19
5	20
5	21
5	22
5	23
5	24
5	25
5	26
5	27
5	28
5	29
5	30
5	31
5	32
5	33
5	34
5	35
5	36
5	37
5	38
5	39
5	40
6	1
6	2
6	3
6	4
6	5
6	6
6	7
6	8
6	9
6	10
6	11
6	12
6	13
6	14
6	15
6	16
6	17
6	18
6	19
6	20
6	21
6	22
6	23
6	24
6	25
6	26
6	27
6	28
6	29
6	30
6	31
6	32
6	33
6	34
6	35
6	36
6	37
6	38
6	39
6	40
7	1	Actb	0.177537	-0.012842
7	2	Actb	0.180636	-0.0130431
7	3	Actb	0.190454	-0.00652608
7	4	Actb	0.197484	-0.00279626
7	5	Actb	0.204173	0.000591696
7	6	Actb	0.210187	0.00330565
7	7	Actb	0.213567	0.00338501
7	8	Actb	0.21572	0.00223746
7	9	Actb	0.219397	0.00261355
7	10	Actb	0.2232	0.00311631
7	11	Actb	0.224229	0.000844409
7	12	Actb	0.226279	-0.000406044
7	13	Actb	0.228527	-0.00145815
7	14	Actb	0.231848	-0.00143801
7	15	Actb	0.234711	-0.0018759
7	16	Actb	0.238293	-0.00159365
7	17	Actb	0.245142	0.00195451
7	18	Actb	0.256979	0.0104907
7	19	Actb	0.276458	0.0266697
7	20	Actb	0.313599	0.0605093
7	21	Actb	0.378764	0.122374
7	22	Actb	0.490555	0.230865
7	23	Actb	0.670443	0.407452
7	24	Actb	0.935083	0.668792
7	25	Actb	1.27524	1.00565
7	26	Actb	1.65651	1.38362
7	27	Actb	2.01669	1.7405
7	28	Actb	2.31706	2.03757
7	29	Actb	2.56471	2.28192
7	30	Actb	2.7662	2.4801
7	31	Actb	2.92871	2.63932
7	32	Actb	3.06036	2.76767
7	33	Actb	3.15944	2.86344
7	34	Actb	3.23644	2.93714
7	35	Actb	3.29482	2.99223
7	36	Actb	3.33445	3.02855
7	37	Actb	3.36321	3.05401
7	38	Actb	3.38572	3.07322
7	39	Actb	3.39975	3.08395
7	40	Actb	3.41293	3.09383
8	1
8	2
8	3
8	4
8	5
8	6
8	7
8	8
8	9
8	10
8	11
8	12
8	13
8	14
8	15
8	16
8	17
8	18
8	19
8	20
8	21
8	22
8	23
8	24
8	25
8	26
8	27
8	28
8	29
8	30
8	31
8	32
8	33
8	34
8	35
8	36
8	37
8	38
8	39
8	40
9	1	Actb	0.162805	-0.0156081
9	2	Actb	0.168029	-0.0135115
9	3	Actb	0.178572	-0.00609544
9	4	Actb	0.186718	-0.0010761
9	5	Actb	0.192045	0.00112423
9	6	Actb	0.19615	0.00210242
9	7	Actb	0.200389	0.00321412
9	8	Actb	0.202561	0.00225886
9	9	Actb	0.205499	0.00206974
9	10	Actb	0.208357	0.00180154
9	11	Actb	0.210215	0.000531595
9	12	Actb	0.212015	-0.000794422
9	13	Actb	0.213888	-0.00204871
9	14	Actb	0.217283	-0.00178104
9	15	Actb	0.220564	-0.00162736
9	16	Actb	0.223961	-0.00135636
9	17	Actb	0.230122	0.00167693
9	18	Actb	0.240467	0.008895
9	19	Actb	0.257433	0.022734
9	20	Actb	0.287846	0.0500198
9	21	Actb	0.343232	0.102279
9	22	Actb	0.439388	0.195309
9	23	Actb	0.597256	0.35005
9	24	Actb	0.831957	0.581624
9	25	Actb	1.14601	0.892549
9	26	Actb	1.50504	1.24846
9	27	Actb	1.85516	1.59545
9	28	Actb	2.15236	1.88952
9	29	Actb	2.39745	2.13148
9	30	Actb	2.59955	2.33046
9	31	Actb	2.75427	2.48204
9	32	Actb	2.89029	2.61494
9	33	Actb	2.99988	2.7214
9	34	Actb	3.08157	2.79997
9	35	Actb	3.14226	2.85753
9	36	Actb	3.19029	2.90243
9	37	Actb	3.21927	2.92829
9	38	Actb	3.23786	2.94375
9	39	Actb	3.25733	2.96009
9	40	Actb	3.27094	2.97058
10	1	Actb	0.149033	-0.0266215
10	2	Actb	0.154485	-0.0228754
10	3	Actb	0.16561	-0.0134548
10	4	Actb	0.171735	-0.00903565
10	5	Actb	0.177982	-0.00449383
10	6	Actb	0.182658	-0.00152251
10	7	Actb	0.185385	-0.000501072
10	8	Actb	0.189156	0.00156552
10	9	Actb	0.191117	0.0018207
10	10	Actb	0.193444	0.00244291
10	11	Actb	0.195729	0.00302324
10	12	Actb	0.197479	0.00306715
10	13	Actb	0.199482	0.00336514
10	14	Actb	0.200323	0.00250176
10	15	Actb	0.202699	0.00317199
10	16	Actb	0.202763	0.0015307
10	17	Actb	0.204856	0.00191924
10	18	Actb	0.207307	0.00266456
10	19	Actb	0.210214	0.00386634
10	20	Actb	0.211302	0.00324917
10	21	Actb	0.212349	0.00259162
10	22	Actb	0.213603	0.00213981
10	23	Actb	0.214374	0.0012061
10	24	Actb	0.21635	0.00147728
10	25	Actb	0.218193	0.00161462
10	26	Actb	0.219698	0.00141448
10	27	Actb	0.221403	0.00141457
10	28	Actb	0.223215	0.00152094
10	29	Actb	0.224638	0.00123897
10	30	Actb	0.225757	0.00065325
10	31	Actb	0.227954	0.00114452
10	32	Actb	0.228296	-0.000217838
10	33	Actb	0.228524	-0.0016955
10	34	Actb	0.230363	-0.00156199
10	35	Actb	0.231886	-0.00174339
10	36	Actb	0.232206	-0.00312917
10	37	Actb	0.233597	-0.00344332
10	38	Actb	0.234509	-0.00423597
10	39	Actb	0.234881	-0.0055696
10	40	Actb	0.235685	-0.00647006
11	1	Actb	0.159917	-0.0303184
11	2	Actb	0.16586	-0.0258602
11	3	Actb	0.176216	-0.01699
11	4	Actb	0.18359	-0.0111003
11	5	Actb	0.189441	-0.00673505
11	6	Actb	0.194781	-0.00287909
11	7	Actb	0.199649	0.00050338
11	8	Actb	0.202013	0.00138268
11	9	Actb	0.204499	0.00238341
11	10	Actb	0.208138	0.00453769
11	11	Actb	0.208775	0.00368972
11	12	Actb	0.210322	0.00375205
11	13	Actb	0.211914	0.00385903
11	14	Actb	0.213329	0.00378893
11	15	Actb	0.214856	0.00383082
11	16	Actb	0.216084	0.0035741
11	17	Actb	0.217064	0.00306898
11	18	Actb	0.219439	0.00395912
11	19	Actb	0.219776	0.00281094
11	20	Actb	0.221306	0.00285585
11	21	Actb	0.222704	0.00276915
11	22	Actb	0.223594	0.00217392
11	23	Actb	0.225792	0.00288653
11	24	Actb	0.227113	0.00272334
11	25	Actb	0.227861	0.00198614
11	26	Actb	0.229638	0.00227814
11	27	Actb	0.231062	0.00221678
11	28	Actb	0.231127	0.000796485
11	29	Actb	0.231287	-0.000528288
11	30	Actb	0.233863	0.000562908
11	31	Actb	0.234871	8.63983e-05
11	32	Actb	0.236265	-5.05085e-06
11	33	Actb	0.237591	-0.000164241
11	34	Actb	0.237658	-0.00158201
11	35	Actb	0.238953	-0.00177217
11	36	Actb	0.239541	-0.0026684
11	37	Actb	0.23893	-0.00476472
11	38	Actb	0.238765	-0.0064148
11	39	Actb	0.239792	-0.00687239
11	40	Actb	0.241318	-0.00683129
12	1	Actb	0.177872	-0.0301429
12	2	Actb	0.184464	-0.0254968
12	3	Actb	0.195029	-0.0168781
12	4	Actb	0.204097	-0.00975538
12	5	Actb	0.210924	-0.00487465
12	6	Actb	0.215362	-0.0023822
12	7	Actb	0.218785	-0.000905166
12	8	Actb	0.222292	0.000656326
12	9	Actb	0.224934	0.00135251
12	10	Actb	0.227193	0.00166492
12	11	Actb	0.230096	0.00262213
12	12	Actb	0.233715	0.00429541
12	13	Actb	0.23492	0.00355454
12	14	Actb	0.237288	0.00397709
12	15	Actb	0.239468	0.00421062
12	16	Actb	0.240604	0.00340074
12	17	Actb	0.242417	0.00326867
12	18	Actb	0.243959	0.00286461
12	19	Actb	0.246383	0.00334229
12	20	Actb	0.248602	0.00361525
12	21	Actb	0.250432	0.00350006
12	22	Actb	0.251858	0.00298022
12	23	Actb	0.253906	0.0030819
12	24	Actb	0.255935	0.00316484
12	25	Actb	0.256876	0.00216065
12	26	Actb	0.259035	0.00237332
12	27	Actb	0.260092	0.00148479
12	28	Actb	0.263147	0.00259359
12	29	Actb	0.264437	0.00193814
12	30	Actb	0.265508	0.00106309
12	31	Actb	0.266607	0.000215807
12	32	Actb	0.268048	-0.000289016
12	33	Actb	0.268432	-0.0018503
12	34	Actb	0.269832	-0.00239604
12	35	Actb	0.270856	-0.00331837
12	36	Actb	0.272542	-0.00357774
12	37	Actb	0.273603	-0.0044626
12	38	Actb	0.274522	-0.00548923
12	39	Actb	0.274755	-0.00720272
12	40	Actb	0.275579	-0.00832391
13	1	Actb	0.194561	-0.0185903
13	2	Actb	0.200175	-0.0163147
13	3	Actb	0.211817	-0.00801069
13	4	Actb	0.22137	-0.00179457
13	5	Actb	0.228098	0.0015954
13	6	Actb	0.232269	0.00242854
13	7	Actb	0.235927	0.00274815
13	8	Actb	0.24028	0.00376345
13	9	Actb	0.24266	0.00280597
13	10	Actb	0.244971	0.00177921
13	11	Actb	0.247832	0.00130196
13	12	Actb	0.249647	-0.000220859
13	13	Actb	0.252409	-0.000796347
13	14	Actb	0.255371	-0.00117164
13	15	Actb	0.257545	-0.00233609
13	16	Actb	0.261249	-0.00196931
13	17	Actb	0.266433	-0.000123163
13	18	Actb	0.27447	0.00457608
13	19	Actb	0.288142	0.0149098
13	20	Actb	0.313712	0.0371428
13	21	Actb	0.358231	0.0783231
13	22	Actb	0.436343	0.153097
13	23	Actb	0.569015	0.282432
13	24	Actb	0.777246	0.487325
13	25	Actb	1.07333	0.780075
13	26	Actb	1.43862	1.14203
13	27	Actb	1.82184	1.5219
13	28	Actb	2.17162	1.86835
13	29	Actb	2.46428	2.15767
13	30	Actb	2.70675	2.3968
13	31	Actb	2.91311	2.59982
13	32	Actb	3.08545	2.76883
13	33	Actb	3.22043	2.90047
13	34	Actb	3.3278	3.0045
13	35	Actb	3.40992	3.08328
13	36	Actb	3.47398	3.144
13	37	Actb	3.51687	3.18356
13	38	Actb	3.55106	3.21441
13	39	Actb	3.56998	3.23
13	40	Actb	3.58598	3.24265
14	1	Actb	0.188235	-0.0183666
14	2	Actb	0.194166	-0.0157265
14	3	Actb	0.206281	-0.00690239
14	4	Actb	0.213404	-0.00307122
14	5	Actb	0.220821	0.00105494
14	6	Actb	0.225804	0.00274615
14	7	Actb	0.229934	0.00358478
14	8	Actb	0.232985	0.00334431
14	9	Actb	0.236244	0.00331227
14	10	Actb	0.238539	0.00231652
14	11	Actb	0.24015	0.000635417
14	12	Actb	0.242272	-0.000533246
14	13	Actb	0.244891	-0.00120615
14	14	Actb	0.24759	-0.00179833
14	15	Actb	0.250491	-0.00218838
14	16	Actb	0.254453	-0.00151788
14	17	Actb	0.259485	0.000223208
14	18	Actb	0.266647	0.00409319
14	19	Actb	0.277882	0.0120371
14	20	Actb	0.300616	0.0314796
14	21	Actb	0.339522	0.0670948
14	22	Actb	0.412021	0.136303
14	23	Actb	0.532969	0.253959
14	24	Actb	0.726525	0.444224
14	25	Actb	1.00697	0.721378
14	26	Actb	1.36701	1.07813
14	27	Actb	1.75656	1.46439
14	28	Actb	2.11383	1.81836
14	29	Actb	2.41836	2.1196
14	30	Actb	2.67229	2.37024
14	31	Actb	2.87745	2.57211
14	32	Actb	3.04291	2.73428
14	33	Actb	3.18133	2.86941
14	34	Actb	3.29662	2.98141
14	35	Actb	3.38095	3.06244
14	36	Actb	3.44147	3.11967
14	37	Actb	3.49547	3.17038
14	38	Actb	3.54083	3.21245
14	39	Actb	3.56557	3.2339
14	40	Actb	3.58407	3.24911
15	1	Actb	0.201806	-0.0176258
15	2	Actb	0.208745	-0.0155053
15	3	Actb	0.2217	-0.00737024
15	4	Actb	0.230588	-0.00330076
15	5	Actb	0.238704	-4.42187e-06
15	6	Actb	0.246014	0.00248649
15	7	Actb	0.251624	0.00327747
15	8	Actb	0.25558	0.00241483
15	9	Actb	0.260956	0.00297153
15	10	Actb	0.266355	0.00355129
15	11	Actb	0.270383	0.00276042
15	12	Actb	0.274369	0.00192717
15	13	Actb	0.277182	-7.85683e-05
15	14	Actb	0.280811	-0.00126852
15	15	Actb	0.285095	-0.00180328
15	16	Actb	0.288901	-0.00281645
15	17	Actb	0.29379	-0.00274696
15	18	Actb	0.301711	0.000354623
15	19	Actb	0.315882	0.009707
15	20	Actb	0.339396	0.0284015
15	21	Actb	0.380946	0.0651331
15	22	Actb	0.454878	0.134246
15	23	Actb	0.578369	0.252918
15	24	Actb	0.770828	0.440558
15	25	Actb	1.04114	0.706047
15	26	Actb	1.37092	1.03101
15	27	Actb	1.71523	1.3705
15	28	Actb	2.02875	1.67921
15	29	Actb	2.29608	1.94172
15	30	Actb	2.52155	2.16237
15	31	Actb	2.70454	2.34054
15	32	Actb	2.86319	2.49437
15	33	Actb	2.98922	2.61558
15	34	Actb	3.09711	2.71865
15	35	Actb	3.17934	2.79606
15	36	Actb	3.24447	2.85637
15	37	Actb	3.28837	2.89545
15	38	Actb	3.32758	2.92984
15	39	Actb	3.3556	2.95304
15	40	Actb	3.37506	2.96769
16	1	Actb	0.177207	-0.0143243
16	2	Actb	0.182716	-0.0121966
16	3	Actb	0.191984	-0.00630969
16	4	Actb	0.200442	-0.00123271
16	5	Actb	0.206973	0.0019179
16	6	Actb	0.210433	0.00199639
16	7	Actb	0.214162	0.00234454
16	8	Actb	0.216996	0.00179803
16	9	Actb	0.220882	0.00230342
16	10	Actb	0.222925	0.000965107
16	11	Actb	0.226215	0.000874249
16	12	Actb	0.228748	2.62478e-05
16	13	Actb	0.232019	-8.33709e-05
16	14	Actb	0.233676	-0.00180695
16	15	Actb	0.23661	-0.00225435
16	16	Actb	0.241706	-0.000538827
16	17	Actb	0.249875	0.0042496
16	18	Actb	0.26265	0.0136431
16	19	Actb	0.286544	0.0341561
16	20	Actb	0.326771	0.0710027
16	21	Actb	0.398975	0.139826
16	22	Actb	0.524414	0.261884
16	23	Actb	0.725786	0.459875
16	24	Actb	1.01885	0.749555
16	25	Actb	1.39722	1.12455
16	26	Actb	1.81305	1.53699
16	27	Actb	2.19979	1.92036
16	28	Actb	2.52463	2.24181
16	29	Actb	2.77965	2.49346
16	30	Actb	2.99032	2.70075
16	31	Actb	3.16626	2.8733
16	32	Actb	3.30429	3.00796
16	33	Actb	3.4149	3.11518
16	34	Actb	3.49509	3.19199
16	35	Actb	3.55571	3.24923
16	36	Actb	3.60657	3.29671
16	37	Actb	3.6402	3.32696
16	38	Actb	3.6665	3.34987
16	39	Actb	3.67957	3.35957
16	40	Actb	3.69158	3.3682
17	1	Actb	0.264928	-0.0212094
17	2	Actb	0.275837	-0.0220293
17	3	Actb	0.296266	-0.0133288
17	4	Actb	0.318792	-0.00253187
17	5	Actb	0.333971	0.000918834
17	6	Actb	0.345508	0.000726769
17	7	Actb	0.360216	0.00370621
17	8	Actb	0.373829	0.00559062
17	9	Actb	0.385388	0.00542022
17	10	Actb	0.397262	0.00556549
17	11	Actb	0.407886	0.00446082
17	12	Actb	0.418162	0.00300788
17	13	Actb	0.427762	0.000879285
17	14	Actb	0.437941	-0.000670127
17	15	Actb	0.446585	-0.00375516
17	16	Actb	0.457067	-0.00500175
17	17	Actb	0.468809	-0.00498842
17	18	Actb	0.486183	0.000656567
17	19	Actb	0.511334	0.014079
17	20	Actb	0.551628	0.042644
17	21	Actb	0.61798	0.0972675
17	22	Actb	0.729334	0.196892
17	23	Actb	0.907126	0.362956
17	24	Actb	1.16743	0.611534
17	25	Actb	1.50648	0.938855
17	26	Actb	1.88618	1.30683
17	27	Actb	2.25033	1.65924
17	28	Actb	2.54724	1.94442
17	29	Actb	2.7909	2.17635
17	30	Actb	3.00165	2.37538
17	31	Actb	3.17196	2.53396
17	32	Actb	3.30691	2.65718
17	33	Actb	3.4151	2.75365
17	34	Actb	3.49541	2.82222
17	35	Actb	3.55826	2.87334
17	36	Actb	3.60034	2.90369
17	37	Actb	3.63646	2.92809
17	38	Actb	3.65018	2.93008
17	39	Actb	3.66563	2.9338
17	40	Actb	3.68032	2.93676
18	1	Actb	0.178024	-0.0132179
18	2	Actb	0.182983	-0.0116528
18	3	Actb	0.192042	-0.00598689
18	4	Actb	0.199709	-0.00171412
18	5	Actb	0.205119	0.000302674
18	6	Actb	0.210184	0.00197413
18	7	Actb	0.214628	0.0030244
18	8	Actb	0.21824	0.00324314
18	9	Actb	0.221502	0.00311179
18	10	Actb	0.224403	0.00261914
18	11	Actb	0.225599	0.000421647
18	12	Actb	0.227773	-0.000798075
18	13	Actb	0.229908	-0.00205669
18	14	Actb	0.232907	-0.00245089
18	15	Actb	0.236936	-0.00181528
18	16	Actb	0.240908	-0.00123755
18	17	Actb	0.246901	0.00136257
18	18	Actb	0.257908	0.00897597
18	19	Actb	0.278208	0.0258825
18	20	Actb	0.315106	0.0593871
18	21	Actb	0.381223	0.12211
18	22	Actb	0.493446	0.23094
18	23	Actb	0.67799	0.412091
18	24	Actb	0.95661	0.687316
18	25	Actb	1.32329	1.0506
18	26	Actb	1.73395	1.45787
18	27	Actb	2.12666	1.84719
18	28	Actb	2.45476	2.17189
18	29	Actb	2.71813	2.43187
18	30	Actb	2.93192	2.64227
18	31	Actb	3.11323	2.82018
18	32	Actb	3.26411	2.96767
18	33	Actb	3.38063	3.08079
18	34	Actb	3.4707	3.16747
18	35	Actb	3.53961	3.23299
18	36	Actb	3.59191	3.28189
18	37	Actb	3.62197	3.30856
18	38	Actb	3.64982	3.33302
18	39	Actb	3.67069	3.3505
18	40	Actb	3.67848	3.3549
19	1	Actb	0.175276	-0.0157751
19	2	Actb	0.182558	-0.0120062
19	3	Actb	0.19216	-0.00591718
19	4	Actb	0.201042	-0.000548043
19	5	Actb	0.20546	0.000356198
19	6	Actb	0.210316	0.00169932
19	7	Actb	0.214932	0.00280209
19	8	Actb	0.218087	0.00244362
19	9	Actb	0.221322	0.00216588
19	10	Actb	0.22381	0.00114007
19	11	Actb	0.227223	0.0010403
19	12	Actb	0.229904	0.000208083
19	13	Actb	0.232072	-0.00113713
19	14	Actb	0.234379	-0.00234387
19	15	Actb	0.23812	-0.00211568
19	16	Actb	0.243955	0.00020633
19	17	Actb	0.252901	0.00563857
19	18	Actb	0.267814	0.0170384
19	19	Actb	0.294671	0.0403823
19	20	Actb	0.343757	0.0859552
19	21	Actb	0.42987	0.168555
19	22	Actb	0.574847	0.310018
19	23	Actb	0.804581	0.536239
19	24	Actb	1.13542	0.863569
19	25	Actb	1.53979	1.26442
19	26	Actb	1.96427	1.68539
19	27	Actb	2.34581	2.06342
19	28	Actb	2.65339	2.36748
19	29	Actb	2.89763	2.60821
19	30	Actb	3.11168	2.81875
19	31	Actb	3.28144	2.98499
19	32	Actb	3.41949	3.11953
19	33	Actb	3.51982	3.21635
19	34	Actb	3.59984	3.29286
19	35	Actb	3.66499	3.35449
19	36	Actb	3.70783	3.39382
19	37	Actb	3.73881	3.42128
19	38	Actb	3.76736	3.44632
19	39	Actb	3.78076	3.45621
19	40	Actb	3.79696	3.46889
20	1	Actb	0.168115	-0.0158358
20	2	Actb	0.173132	-0.0141175
20	3	Actb	0.18452	-0.00602799
20	4	Actb	0.192354	-0.00149302
20	5	Actb	0.197597	0.000450999
20	6	Actb	0.202316	0.00187181
20	7	Actb	0.206764	0.00302065
20	8	Actb	0.209467	0.00242498
20	9	Actb	0.213478	0.00313701
20	10	Actb	0.215754	0.00211452
20	11	Actb	0.218214	0.00127566
20	12	Actb	0.219491	-0.000746138
20	13	Actb	0.221212	-0.00232329
20	14	Actb	0.224973	-0.00186123
20	15	Actb	0.228801	-0.00133228
20	16	Actb	0.23292	-0.000511685
20	17	Actb	0.240411	0.00368095
20	18	Actb	0.254229	0.0141999
20	19	Actb	0.278067	0.0347389
20	20	Actb	0.321549	0.0749224
20	21	Actb	0.396566	0.146641
20	22	Actb	0.525827	0.272603
20	23	Actb	0.733421	0.476898
20	24	Actb	1.02936	0.76954
20	25	Actb	1.40131	1.13819
20	26	Actb	1.79235	1.52593
20	27	Actb	2.14544	1.87572
20	28	Actb	2.43796	2.16495
20	29	Actb	2.67575	2.39944
20	30	Actb	2.87241	2.59279
20	31	Actb	3.02272	2.73981
20	32	Actb	3.15438	2.86817
20	33	Actb	3.2615	2.97199
20	34	Actb	3.34473	3.05192
20	35	Actb	3.40641	3.1103
20	36	Actb	3.45072	3.15131
20	37	Actb	3.482	3.1793
20	38	Actb	3.51452	3.20851
20	39	Actb	3.52896	3.21966
20	40	Actb	3.53314	3.22054
21	1	Actb	0.165067	-0.0158734
21	2	Actb	0.170295	-0.0140575
21	3	Actb	0.18166	-0.00610397
21	4	Actb	0.188302	-0.00287452
21	5	Actb	0.195542	0.000953514
21	6	Actb	0.200876	0.00287595
21	7	Actb	0.204072	0.00265948
21	8	Actb	0.206763	0.00193827
21	9	Actb	0.211455	0.00321866
21	10	Actb	0.213725	0.00207666
21	11	Actb	0.216657	0.00159651
21	12	Actb	0.218727	0.000253992
21	13	Actb	0.220883	-0.00100111
21	14	Actb	0.223723	-0.00157378
21	15	Actb	0.226027	-0.00268193
21	16	Actb	0.230783	-0.00133772
21	17	Actb	0.240425	0.00489189
21	18	Actb	0.254657	0.0157118
21	19	Actb	0.277541	0.0351846
21	20	Actb	0.322099	0.0763302
21	21	Actb	0.400031	0.15085
21	22	Actb	0.53043	0.277838
21	23	Actb	0.735406	0.479401
21	24	Actb	1.02644	0.767021
21	25	Actb	1.38143	1.1186
21	26	Actb	1.75356	1.48732
21	27	Actb	2.09058	1.82093
21	28	Actb	2.36847	2.09541
21	29	Actb	2.59374	2.31726
21	30	Actb	2.77621	2.49632
21	31	Actb	2.92706	2.64376
21	32	Actb	3.04442	2.75771
21	33	Actb	3.13298	2.84286
21	34	Actb	3.19809	2.90456
21	35	Actb	3.24485	2.9479
21	36	Actb	3.27056	2.9702
21	37	Actb	3.30039	2.99662
21	38	Actb	3.31065	3.00346
21	39	Actb	3.32542	3.01482
21	40	Actb	3.32467	3.01066
22	1	Actb	0.161952	-0.012857
22	2	Actb	0.167275	-0.0104498
22	3	Actb	0.174782	-0.00585857
22	4	Actb	0.181929	-0.00162654
22	5	Actb	0.186491	1.93372e-05
22	6	Actb	0.190657	0.00126997
22	7	Actb	0.194807	0.00250477
22	8	Actb	0.197886	0.00266762
22	9	Actb	0.201014	0.00287985
22	10	Actb	0.203884	0.00283513
22	11	Actb	0.206016	0.00205151
22	12	Actb	0.206649	-0.000230909
22	13	Actb	0.20897	-0.000825886
22	14	Actb	0.211463	-0.0012488
22	15	Actb	0.213443	-0.00218436
22	16	Actb	0.215829	-0.00271368
22	17	Actb	0.221919	0.000460546
22	18	Actb	0.231763	0.00738955
22	19	Actb	0.247605	0.0203157
22	20	Actb	0.273583	0.0433778
22	21	Actb	0.320969	0.0878486
22	22	Actb	0.405563	0.169527
22	23	Actb	0.54688	0.307928
22	24	Actb	0.763365	0.521497
22	25	Actb	1.05992	0.815134
22	26	Actb	1.41622	1.16852
22	27	Actb	1.77823	1.52762
22	28	Actb	2.10182	1.84829
22	29	Actb	2.37074	2.11429
22	30	Actb	2.58836	2.32899
22	31	Actb	2.76356	2.50129
22	32	Actb	2.90207	2.63688
22	33	Actb	3.01447	2.74636
22	34	Actb	3.09517	2.82415
22	35	Actb	3.1513	2.87736
22	36	Actb	3.19004	2.91319
22	37	Actb	3.22213	2.94237
22	38	Actb	3.24265	2.95997
22	39	Actb	3.25529	2.96969
22	40	Actb	3.26107	2.97255
23	1	Actb	0.193863	-0.0148107
23	2	Actb	0.199388	-0.0124497
23	3	Actb	0.208163	-0.00683794
23	4	Actb	0.216549	-0.00161572
23	5	Actb	0.221479	0.000150276
23	6	Actb	0.227017	0.00252488
23	7	Actb	0.230137	0.00248139
23	8	Actb	0.23343	0.00261034
23	9	Actb	0.23711	0.0031263
23	10	Actb	0.239715	0.00256785
23	11	Actb	0.240813	0.000502148
23	12	Actb	0.244656	0.00118149
23	13	Actb	0.247101	0.000462843
23	14	Actb	0.247356	-0.00244628
23	15	Actb	0.250635	-0.00233091
23	16	Actb	0.253225	-0.00290481
23	17	Actb	0.259822	0.000528147
23	18	Actb	0.270159	0.00770225
23	19	Actb	0.286686	0.0210649
23	20	Actb	0.31522	0.0464354
23	21	Actb	0.369311	0.0973629
23	22	Actb	0.465284	0.190172
23	23	Actb	0.625819	0.347543
23	24	Actb	0.875486	0.594046
23	25	Actb	1.21996	0.935359
23	26	Actb	1.6295	1.34173
23	27	Actb	2.04104	1.75011
23	28	Actb	2.3968	2.1027
23	29	Actb	2.6824	2.38514
23	30	Actb	2.9231	2.62268
23	31	Actb	3.11957	2.81598
23	32	Actb	3.27815	2.9714
23	33	Actb	3.412	3.10209
23	34	Actb	3.51977	3.20669
23	35	Actb	3.60297	3.28673
23	36	Actb	3.66834	3.34894
23	37	Actb	3.73026	3.40769
23	38	Actb	3.77588	3.45015
23	39	Actb	3.80692	3.47802
23	40	Actb	3.81932	3.48726
24	1	Actb	0.211802	-0.0157804
24	2	Actb	0.216218	-0.0143744
24	3	Actb	0.227176	-0.00642626
24	4	Actb	0.236453	-0.000159883
24	5	Actb	0.24001	0.000387752
24	6	Actb	0.244857	0.00222486
24	7	Actb	0.249486	0.0038437
24	8	Actb	0.250756	0.00210361
24	9	Actb	0.252687	0.00102486
24	10	Actb	0.255274	0.000602239
24	11	Actb	0.2584	0.000718144
24	12	Actb	0.260129	-0.000562757
24	13	Actb	0.263496	-0.000205514
24	14	Actb	0.265642	-0.00106972
24	15	Actb	0.268055	-0.00166654
24	16	Actb	0.271736	-0.000995267
24	17	Actb	0.275922	0.000180766
24	18	Actb	0.287475	0.0087245
24	19	Actb	0.306315	0.0245539
24	20	Actb	0.342182	0.0574118
24	21	Actb	0.403757	0.115977
24	22	Actb	0.510374	0.219584
24	23	Actb	0.689318	0.395518
24	24	Actb	0.959042	0.662232
24	25	Actb	1.31208	1.01226
24	26	Actb	1.7158	1.41297
24	27	Actb	2.09875	1.79291
24	28	Actb	2.42105	2.1122
24	29	Actb	2.68632	2.37446
24	30	Actb	2.90452	2.58965
24	31	Actb	3.08299	2.76511
24	32	Actb	3.23477	2.91388
24	33	Actb	3.35697	3.03308
24	34	Actb	3.45429	3.12739
24	35	Actb	3.52766	3.19774
24	36	Actb	3.58658	3.25365
24	37	Actb	3.64072	3.30479
24	38	Actb	3.6759	3.33695
24	39	Actb	3.69914	3.35718
24	40	Actb	3.71592	3.37096
25	1	Gadph	0.52502	-0.00490783
25	2	Gadph	0.529361	-0.00342267
25	3	Gadph	0.536355	0.000714958
25	4	Gadph	0.538413	-8.35755e-05
25	5	Gadph	0.540349	-0.00100436
25	6	Gadph	0.544895	0.000685365
25	7	Gadph	0.545937	-0.00112853
25	8	Gadph	0.55056	0.000637423
25	9	Gadph	0.553414	0.000635804
25	10	Gadph	0.556181	0.000546506
25	11	Gadph	0.556911	-0.00157972
25	12	Gadph	0.560748	-0.000599293
25	13	Gadph	0.565379	0.00117543
25	14	Gadph	0.570926	0.00386591
25	15	Gadph	0.587	0.0170832
25	16	Gadph	0.608996	0.036223
25	17	Gadph	0.651018	0.075389
25	18	Gadph	0.730327	0.151842
25	19	Gadph	0.871924	0.290582
25	20	Gadph	1.11793	0.533733
25	21	Gadph	1.49853	0.911476
25	22	Gadph	2.00915	1.41924
25	23	Gadph	2.58062	1.98785
25	24	Gadph	3.1295	2.53388
25	25	Gadph	3.59189	2.99341
25	26	Gadph	3.95923	3.35789
25	27	Gadph	4.26092	3.65672
25	28	Gadph	4.49675	3.8897
25	29	Gadph	4.68839	4.07849
25	30	Gadph	4.85851	4.24575
25	31	Gadph	5.00287	4.38726
25	32	Gadph	5.11826	4.49979
25	33	Gadph	5.20705	4.58572
25	34	Gadph	5.29546	4.67127
25	35	Gadph	5.36965	4.74261
25	36	Gadph	5.43543	4.80553
25	37	Gadph	5.48953	4.85677
25	38	Gadph	5.53815	4.90254
25	39	Gadph	5.57709	4.93862
25	40	Gadph	5.60836	4.96704
26	1	Gadph	0.480306	-0.00556526
26	2	Gadph	0.48389	-0.00520782
26	3	Gadph	0.491539	-0.000784335
26	4	Gadph	0.495635	8.55229e-05
26	5	Gadph	0.499665	0.000889875
26	6	Gadph	0.502668	0.000666047
26	7	Gadph	0.506223	0.000994933
26	8	Gadph	0.508487	3.32594e-05
26	9	Gadph	0.511203	-0.000476373
26	10	Gadph	0.512595	-0.0023109
26	11	Gadph	0.517284	-0.000848271
26	12	Gadph	0.521049	-0.000308862
26	13	Gadph	0.526643	0.0020591
26	14	Gadph	0.535989	0.0081784
26	15	Gadph	0.552049	0.0210129
26	16	Gadph	0.580538	0.0462755
26	17	Gadph	0.63355	0.096062
26	18	Gadph	0.7334	0.192685
26	19	Gadph	0.911648	0.367708
26	20	Gadph	1.20985	0.662685
26	21	Gadph	1.64794	1.09755
26	22	Gadph	2.20626	1.65264
26	23	Gadph	2.79851	2.24167
26	24	Gadph	3.32248	2.76241
26	25	Gadph	3.75925	3.19596
26	26	Gadph	4.10662	3.5401
26	27	Gadph	4.38408	3.81433
26	28	Gadph	4.60739	4.03441
26	29	Gadph	4.79479	4.21859
26	30	Gadph	4.93624	4.35681
26	31	Gadph	5.06075	4.47809
26	32	Gadph	5.16018	4.5743
26	33	Gadph	5.2432	4.65409
26	34	Gadph	5.3234	4.73106
26	35	Gadph	5.39694	4.80138
26	36	Gadph	5.46107	4.86229
26	37	Gadph	5.50836	4.90635
26	38	Gadph	5.55089	4.94566
26	39	Gadph	5.59385	4.98539
26	40	Gadph	5.62836	5.01667
27	1	Gadph	0.494799	-0.00880416
27	2	Gadph	0.500549	-0.00708549
27	3	Gadph	0.510723	-0.000941705
27	4	Gadph	0.516202	0.0005069
27	5	Gadph	0.520211	0.000485474
27	6	Gadph	0.523684	-7.17369e-05
27	7	Gadph	0.528706	0.00091964
27	8	Gadph	0.532035	0.000218126
27	9	Gadph	0.536052	0.000205105
27	10	Gadph	0.539049	-0.000828943
27	11	Gadph	0.542742	-0.00116621
27	12	Gadph	0.546802	-0.00113632
27	13	Gadph	0.553779	0.00180967
27	14	Gadph	0.560153	0.00415348
27	15	Gadph	0.574838	0.0148078
27	16	Gadph	0.601574	0.0375136
27	17	Gadph	0.652056	0.0839654
27	18	Gadph	0.743983	0.171862
27	19	Gadph	0.907231	0.331079
27	20	Gadph	1.17942	0.599239
27	21	Gadph	1.59001	1.0058
27	22	Gadph	2.11914	1.5309
27	23	Gadph	2.68331	2.09103
27	24	Gadph	3.20201	2.60571
27	25	Gadph	3.63212	3.03178
27	26	Gadph	3.97415	3.36979
27	27	Gadph	4.26616	3.65776
27	28	Gadph	4.4973	3.88488
27	29	Gadph	4.68548	4.06903
27	30	Gadph	4.83418	4.21369
27	31	Gadph	4.95852	4.334
27	32	Gadph	5.0654	4.43685
27	33	Gadph	5.15507	4.52249
27	34	Gadph	5.23563	4.59902
27	35	Gadph	5.30209	4.66145
27	36	Gadph	5.36518	4.72051
27	37	Gadph	5.41699	4.76829
27	38	Gadph	5.45955	4.80682
27	39	Gadph	5.5016	4.84484
27	40	Gadph	5.5437	4.88291
28	1
28	2
28	3
28	4
28	5
28	6
28	7
28	8
28	9
28	10
28	11
28	12
28	13
28	14
28	15
28	16
28	17
28	18
28	19
28	20
28	21
28	22
28	23
28	24
28	25
28	26
28	27
28	28
28	29
28	30
28	31
28	32
28	33
28	34
28	35
28	36
28	37
28	38
28	39
28	40
29	1
29	2
29	3
29	4
29	5
29	6
29	7
29	8
29	9
29	10
29	11
29	12
29	13
29	14
29	15
29	16
29	17
29	18
29	19
29	20
29	21
29	22
29	23
29	24
29	25
29	26
29	27
29	28
29	29
29	30
29	31
29	32
29	33
29	34
29	35
29	36
29	37
29	38
29	39
29	40
30	1
30	2
30	3
30	4
30	5
30	6
30	7
30	8
30	9
30	10
30	11
30	12
30	13
30	14
30	15
30	16
30	17
30	18
30	19
30	20
30	21
30	22
30	23
30	24
30	25
30	26
30	27
30	28
30	29
30	30
30	31
30	32
30	33
30	34
30	35
30	36
30	37
30	38
30	39
30	40
31	1	Gadph	0.467419	-0.00760911
31	2	Gadph	0.471241	-0.00911928
31	3	Gadph	0.482053	-0.00363947
31	4	Gadph	0.491001	-2.33716e-05
31	5	Gadph	0.498004	0.00164851
31	6	Gadph	0.502682	0.00099447
31	7	Gadph	0.508948	0.00192815
31	8	Gadph	0.514162	0.00181088
31	9	Gadph	0.518308	0.000624002
31	10	Gadph	0.523247	0.000231596
31	11	Gadph	0.526739	-0.00160783
31	12	Gadph	0.531366	-0.00231304
31	13	Gadph	0.537528	-0.00148361
31	14	Gadph	0.546173	0.00182972
31	15	Gadph	0.558638	0.00896342
31	16	Gadph	0.581467	0.0264605
31	17	Gadph	0.623512	0.0631735
31	18	Gadph	0.700982	0.135312
31	19	Gadph	0.839933	0.26893
31	20	Gadph	1.07621	0.499876
31	21	Gadph	1.44313	0.861465
31	22	Gadph	1.9463	1.3593
31	23	Gadph	2.52701	1.93468
31	24	Gadph	3.07917	2.48151
31	25	Gadph	3.54854	2.94555
31	26	Gadph	3.92072	3.3124
31	27	Gadph	4.23018	3.61652
31	28	Gadph	4.48578	3.86679
31	29	Gadph	4.67878	4.05446
31	30	Gadph	4.83862	4.20896
31	31	Gadph	4.9769	4.34192
31	32	Gadph	5.08982	4.4495
31	33	Gadph	5.18797	4.54232
31	34	Gadph	5.27415	4.62317
31	35	Gadph	5.34103	4.68472
31	36	Gadph	5.39869	4.73705
31	37	Gadph	5.44184	4.77486
31	38	Gadph	5.49713	4.82482
31	39	Gadph	5.54048	4.86284
31	40	Gadph	5.56001	4.87704
32	1	Gadph	0.471318	-0.00670011
32	2	Gadph	0.475631	-0.0057891
32	3	Gadph	0.48234	-0.00248229
32	4	Gadph	0.487734	-0.000489754
32	5	Gadph	0.494169	0.00254315
32	6	Gadph	0.496931	0.00190307
32	7	Gadph	0.499315	0.000885148
32	8	Gadph	0.501145	-0.000687301
32	9	Gadph	0.504611	-0.000622411
32	10	Gadph	0.507772	-0.000863769
32	11	Gadph	0.511669	-0.000369189
32	12	Gadph	0.514949	-0.00049104
32	13	Gadph	0.519516	0.00067439
32	14	Gadph	0.528181	0.00593782
32	15	Gadph	0.54173	0.0160842
32	16	Gadph	0.565432	0.0363843
32	17	Gadph	0.609642	0.0771926
32	18	Gadph	0.692116	0.156265
32	19	Gadph	0.841678	0.302424
32	20	Gadph	1.09687	0.554215
32	21	Gadph	1.49224	0.946182
32	22	Gadph	2.02264	1.47318
32	23	Gadph	2.61343	2.06057
32	24	Gadph	3.17704	2.62077
32	25	Gadph	3.66008	3.10041
32	26	Gadph	4.0429	3.47983
32	27	Gadph	4.33583	3.76937
32	28	Gadph	4.57196	4.00209
32	29	Gadph	4.76528	4.19201
32	30	Gadph	4.92074	4.34407
32	31	Gadph	5.0504	4.47033
32	32	Gadph	5.15181	4.56833
32	33	Gadph	5.22997	4.64309
32	34	Gadph	5.30172	4.71144
32	35	Gadph	5.3822	4.78852
32	36	Gadph	5.44343	4.84634
32	37	Gadph	5.50173	4.90124
32	38	Gadph	5.54248	4.93858
32	39	Gadph	5.58107	4.97378
32	40	Gadph	5.60271	4.99202
33	1	Gadph	0.468626	-0.00604376
33	2	Gadph	0.4729	-0.00558429
33	3	Gadph	0.480759	-0.00154079
33	4	Gadph	0.486199	8.44955e-05
33	5	Gadph	0.490264	0.000334489
33	6	Gadph	0.494314	0.000570237
33	7	Gadph	0.4976	4.17037e-05
33	8	Gadph	0.503273	0.0018992
33	9	Gadph	0.505686	0.000497434
33	10	Gadph	0.508661	-0.000342265
33	11	Gadph	0.512074	-0.000743929
33	12	Gadph	0.515392	-0.0012415
33	13	Gadph	0.520889	0.000440915
33	14	Gadph	0.528731	0.00446776
33	15	Gadph	0.542638	0.01456
33	16	Gadph	0.567425	0.0355328
33	17	Gadph	0.614347	0.0786393
33	18	Gadph	0.701833	0.162311
33	19	Gadph	0.859633	0.316296
33	20	Gadph	1.12495	0.577798
33	21	Gadph	1.53331	0.982342
33	22	Gadph	2.07755	1.52276
33	23	Gadph	2.68273	2.12414
33	24	Gadph	3.23624	2.67383
33	25	Gadph	3.69926	3.13304
33	26	Gadph	4.05716	3.48712
33	27	Gadph	4.34288	3.76902
33	28	Gadph	4.57215	3.99448
33	29	Gadph	4.75352	4.17204
33	30	Gadph	4.90459	4.31929
33	31	Gadph	5.03053	4.44141
33	32	Gadph	5.14192	4.54899
33	33	Gadph	5.22842	4.63167
33	34	Gadph	5.29683	4.69627
33	35	Gadph	5.35774	4.75337
33	36	Gadph	5.40756	4.79937
33	37	Gadph	5.45705	4.84504
33	38	Gadph	5.5059	4.89008
33	39	Gadph	5.54556	4.92593
33	40	Gadph	5.5666	4.94315
34	1	Gadph	0.443392	-0.0248042
34	2	Gadph	0.449263	-0.021231
34	3	Gadph	0.459811	-0.0129809
34	4	Gadph	0.466387	-0.00870276
34	5	Gadph	0.471578	-0.00580912
34	6	Gadph	0.476579	-0.00310582
34	7	Gadph	0.48153	-0.000452231
34	8	Gadph	0.484546	0.000265101
34	9	Gadph	0.487067	0.000488817
34	10	Gadph	0.490323	0.00144722
34	11	Gadph	0.494337	0.00316338
34	12	Gadph	0.496944	0.00347274
34	13	Gadph	0.499585	0.00381635
34	14	Gadph	0.501512	0.0034456
34	15	Gadph	0.503163	0.00279832
34	16	Gadph	0.506834	0.00417169
34	17	Gadph	0.509791	0.00483052
34	18	Gadph	0.5117	0.00444245
34	19	Gadph	0.512698	0.00314225
34	20	Gadph	0.512497	0.000643648
34	21	Gadph	0.513887	-0.000263754
34	22	Gadph	0.518143	0.00169386
34	23	Gadph	0.521515	0.00276891
34	24	Gadph	0.52522	0.00417554
34	25	Gadph	0.525645	0.00230284
34	26	Gadph	0.527797	0.00215695
34	27	Gadph	0.530538	0.00260055
34	28	Gadph	0.532489	0.00225343
34	29	Gadph	0.533487	0.00095359
34	30	Gadph	0.534806	-2.42642e-05
34	31	Gadph	0.537211	8.27458e-05
34	32	Gadph	0.539044	-0.00038227
34	33	Gadph	0.541918	0.000194007
34	34	Gadph	0.542885	-0.00113647
34	35	Gadph	0.543847	-0.00247225
34	36	Gadph	0.545645	-0.00297195
34	37	Gadph	0.546037	-0.00487821
34	38	Gadph	0.547813	-0.00539979
34	39	Gadph	0.54878	-0.00673068
34	40	Gadph	0.548967	-0.00884108
35	1	Gadph	0.447314	-0.0266794
35	2	Gadph	0.453378	-0.0226501
35	3	Gadph	0.463731	-0.0143307
35	4	Gadph	0.472473	-0.00762308
35	5	Gadph	0.477193	-0.00493672
35	6	Gadph	0.481896	-0.0022681
35	7	Gadph	0.485476	-0.000722451
35	8	Gadph	0.488721	0.000488811
35	9	Gadph	0.4916	0.00133339
35	10	Gadph	0.49469	0.00238941
35	11	Gadph	0.495637	0.00130252
35	12	Gadph	0.49754	0.0011711
35	13	Gadph	0.500285	0.00188178
35	14	Gadph	0.503003	0.00256572
35	15	Gadph	0.505802	0.00333108
35	16	Gadph	0.507334	0.00282853
35	17	Gadph	0.509967	0.00342777
35	18	Gadph	0.512932	0.00435847
35	19	Gadph	0.51357	0.00296281
35	20	Gadph	0.515741	0.00309934
35	21	Gadph	0.518405	0.00372934
35	22	Gadph	0.520028	0.00331786
35	23	Gadph	0.522094	0.00335021
35	24	Gadph	0.522574	0.00179635
35	25	Gadph	0.525089	0.00227662
35	26	Gadph	0.529214	0.00436765
35	27	Gadph	0.529529	0.00264875
35	28	Gadph	0.53088	0.00196601
35	29	Gadph	0.532929	0.00198023
35	30	Gadph	0.534401	0.00141874
35	31	Gadph	0.535536	0.000519934
35	32	Gadph	0.534822	-0.00222888
35	33	Gadph	0.53746	-0.00162499
35	34	Gadph	0.539468	-0.00165094
35	35	Gadph	0.541348	-0.00180539
35	36	Gadph	0.540875	-0.00431185
35	37	Gadph	0.541428	-0.00579311
35	38	Gadph	0.544567	-0.00468836
35	39	Gadph	0.544761	-0.00652784
35	40	Gadph	0.545949	-0.00737473
36	1	Gadph	0.57481	-0.0147585
36	2	Gadph	0.57973	-0.0118812
36	3	Gadph	0.58698	-0.00667402
36	4	Gadph	0.591398	-0.00429873
36	5	Gadph	0.59622	-0.00151861
36	6	Gadph	0.597749	-0.00203236
36	7	Gadph	0.601185	-0.000638647
36	8	Gadph	0.604182	0.000315723
36	9	Gadph	0.604863	-0.00104537
36	10	Gadph	0.608092	0.000140567
36	11	Gadph	0.612206	0.00221264
36	12	Gadph	0.61571	0.00367383
36	13	Gadph	0.616189	0.00211056
36	14	Gadph	0.617161	0.00103933
36	15	Gadph	0.618877	0.000713273
36	16	Gadph	0.62175	0.0015439
36	17	Gadph	0.623726	0.00147713
36	18	Gadph	0.624374	8.26591e-05
36	19	Gadph	0.626836	0.000502674
36	20	Gadph	0.629184	0.000807473
36	21	Gadph	0.631723	0.0013048
36	22	Gadph	0.633108	0.000646741
36	23	Gadph	0.634987	0.000483048
36	24	Gadph	0.63744	0.000894003
36	25	Gadph	0.64104	0.00245151
36	26	Gadph	0.643694	0.00306238
36	27	Gadph	0.644419	0.00174582
36	28	Gadph	0.647122	0.0024058
36	29	Gadph	0.649763	0.00300403
36	30	Gadph	0.649755	0.000953971
36	31	Gadph	0.651782	0.000937979
36	32	Gadph	0.653712	0.000826201
36	33	Gadph	0.654509	-0.000419495
36	34	Gadph	0.655196	-0.00177528
36	35	Gadph	0.655618	-0.00339589
36	36	Gadph	0.659259	-0.00179731
36	37	Gadph	0.661699	-0.00139971
36	38	Gadph	0.662324	-0.00281737
36	39	Gadph	0.66166	-0.00552326
36	40	Gadph	0.661265	-0.00796075
37	1
37	2
37	3
37	4
37	5
37	6
37	7
37	8
37	9
37	10
37	11
37	12
37	13
37	14
37	15
37	16
37	17
37	18
37	19
37	20
37	21
37	22
37	23
37	24
37	25
37	26
37	27
37	28
37	29
37	30
37	31
37	32
37	33
37	34
37	35
37	36
37	37
37	38
37	39
37	40
38	1	Gadph	0.586215	-0.00755236
38	2	Gadph	0.592556	-0.0062063
38	3	Gadph	0.602643	-0.00111498
38	4	Gadph	0.607876	-0.000877328
38	5	Gadph	0.614726	0.000977398
38	6	Gadph	0.619329	0.000585685
38	7	Gadph	0.624505	0.000765938
38	8	Gadph	0.629586	0.000852135
38	9	Gadph	0.634267	0.000537133
38	10	Gadph	0.638128	-0.000596598
38	11	Gadph	0.642742	-0.000978119
38	12	Gadph	0.648583	-0.000132022
38	13	Gadph	0.653691	-1.92415e-05
38	14	Gadph	0.662767	0.004061
38	15	Gadph	0.677976	0.0142749
38	16	Gadph	0.702156	0.0334598
38	17	Gadph	0.742787	0.0690954
38	18	Gadph	0.822563	0.143876
38	19	Gadph	0.966236	0.282554
38	20	Gadph	1.21559	0.526909
38	21	Gadph	1.60657	0.912895
38	22	Gadph	2.14164	1.44297
38	23	Gadph	2.76256	2.0589
38	24	Gadph	3.35538	2.64672
38	25	Gadph	3.84715	3.1335
38	26	Gadph	4.23375	3.51511
38	27	Gadph	4.53076	3.80711
38	28	Gadph	4.77831	4.04967
38	29	Gadph	4.96621	4.23257
38	30	Gadph	5.12263	4.384
38	31	Gadph	5.25234	4.50871
38	32	Gadph	5.36166	4.61304
38	33	Gadph	5.45498	4.70137
38	34	Gadph	5.53047	4.77186
38	35	Gadph	5.59166	4.82805
38	36	Gadph	5.64493	4.87633
38	37	Gadph	5.68318	4.90958
38	38	Gadph	5.73595	4.95736
38	39	Gadph	5.78746	5.00387
38	40	Gadph	5.82445	5.03587
39	1	Gadph	0.525363	-0.00846138
39	2	Gadph	0.530006	-0.00713872
39	3	Gadph	0.538094	-0.00237037
39	4	Gadph	0.543848	6.36827e-05
39	5	Gadph	0.548705	0.0016008
39	6	Gadph	0.550689	0.000264741
39	7	Gadph	0.555678	0.00193472
39	8	Gadph	0.557658	0.000594426
39	9	Gadph	0.559858	-0.000525748
39	10	Gadph	0.562722	-0.000981449
39	11	Gadph	0.56675	-0.000272833
39	12	Gadph	0.569826	-0.000516521
39	13	Gadph	0.573871	0.000208546
39	14	Gadph	0.581295	0.00431266
39	15	Gadph	0.593598	0.0132952
39	16	Gadph	0.617107	0.033485
39	17	Gadph	0.659471	0.0725293
39	18	Gadph	0.735438	0.145176
39	19	Gadph	0.876582	0.283
39	20	Gadph	1.12361	0.526713
39	21	Gadph	1.51143	0.911207
39	22	Gadph	2.04875	1.44521
39	23	Gadph	2.67077	2.0639
39	24	Gadph	3.26766	2.65748
39	25	Gadph	3.76251	3.14901
39	26	Gadph	4.13927	3.52245
39	27	Gadph	4.44915	3.82901
39	28	Gadph	4.69552	4.07206
39	29	Gadph	4.88546	4.25868
39	30	Gadph	5.04363	4.41353
39	31	Gadph	5.17074	4.53732
39	32	Gadph	5.29104	4.6543
39	33	Gadph	5.38028	4.74022
39	34	Gadph	5.46184	4.81846
39	35	Gadph	5.51676	4.87006
39	36	Gadph	5.56855	4.91853
39	37	Gadph	5.61819	4.96485
39	38	Gadph	5.66011	5.00345
39	39	Gadph	5.70154	5.04156
39	40	Gadph	5.72873	5.06543
40	1	Gadph	0.545525	-0.00156792
40	2	Gadph	0.5487	-0.00166511
40	3	Gadph	0.552646	-0.000990597
40	4	Gadph	0.556739	-0.000169756
40	5	Gadph	0.561091	0.000910305
40	6	Gadph	0.564957	0.00150453
40	7	Gadph	0.567887	0.00116248
40	8	Gadph	0.569171	-0.000825546
40	9	Gadph	0.572378	-0.000890133
40	10	Gadph	0.575847	-0.000693174
40	11	Gadph	0.57817	-0.001642
40	12	Gadph	0.582781	-0.000303488
40	13	Gadph	0.588293	0.00193737
40	14	Gadph	0.595347	0.0057186
40	15	Gadph	0.609521	0.0166214
40	16	Gadph	0.636299	0.0401275
40	17	Gadph	0.685914	0.0864699
40	18	Gadph	0.778273	0.175557
40	19	Gadph	0.946294	0.340306
40	20	Gadph	1.22771	0.61845
40	21	Gadph	1.66	1.04747
40	22	Gadph	2.23075	1.61495
40	23	Gadph	2.8574	2.23832
40	24	Gadph	3.4213	2.79896
40	25	Gadph	3.88537	3.25975
40	26	Gadph	4.24583	3.61694
40	27	Gadph	4.53188	3.89972
40	28	Gadph	4.7585	4.12306
40	29	Gadph	4.93725	4.29854
40	30	Gadph	5.08174	4.43976
40	31	Gadph	5.20409	4.55884
40	32	Gadph	5.29836	4.64984
40	33	Gadph	5.38143	4.72964
40	34	Gadph	5.46375	4.80869
40	35	Gadph	5.52773	4.86939
40	36	Gadph	5.57137	4.90976
40	37	Gadph	5.6243	4.95941
40	38	Gadph	5.67261	5.00446
40	39	Gadph	5.70977	5.03834
40	40	Gadph	5.74551	5.07081
41	1	Gadph	0.48859	0.00723543
41	2	Gadph	0.486231	0.00695315
41	3	Gadph	0.480682	0.00348125
41	4	Gadph	0.476724	0.00160049
41	5	Gadph	0.472395	-0.000651695
41	6	Gadph	0.469707	-0.00126192
41	7	Gadph	0.467165	-0.00172674
41	8	Gadph	0.465083	-0.00173237
41	9	Gadph	0.462181	-0.00255735
41	10	Gadph	0.461059	-0.00160185
41	11	Gadph	0.459529	-0.00105521
41	12	Gadph	0.459504	0.000997788
41	13	Gadph	0.460937	0.00450761
41	14	Gadph	0.463869	0.00951635
41	15	Gadph	0.470782	0.0185069
41	16	Gadph	0.487333	0.0371342
41	17	Gadph	0.519756	0.0716348
41	18	Gadph	0.578186	0.132142
41	19	Gadph	0.685	0.241033
41	20	Gadph	0.866817	0.424927
41	21	Gadph	1.1501	0.710291
41	22	Gadph	1.54236	1.10463
41	23	Gadph	1.99098	1.55532
41	24	Gadph	2.41563	1.98205
41	25	Gadph	2.76401	2.3325
41	26	Gadph	3.03799	2.60856
41	27	Gadph	3.25317	2.82581
41	28	Gadph	3.42931	3.00403
41	29	Gadph	3.57303	3.14983
41	30	Gadph	3.69271	3.27159
41	31	Gadph	3.78839	3.36934
41	32	Gadph	3.854	3.43704
41	33	Gadph	3.92149	3.5066
41	34	Gadph	3.98214	3.56933
41	35	Gadph	4.02771	3.61698
41	36	Gadph	4.07286	3.66421
41	37	Gadph	4.10849	3.70191
41	38	Gadph	4.14176	3.73726
41	39	Gadph	4.16637	3.76394
41	40	Gadph	4.20279	3.80245
42	1
42	2
42	3
42	4
42	5
42	6
42	7
42	8
42	9
42	10
42	11
42	12
42	13
42	14
42	15
42	16
42	17
42	18
42	19
42	20
42	21
42	22
42	23
42	24
42	25
42	26
42	27
42	28
42	29
42	30
42	31
42	32
42	33
42	34
42	35
42	36
42	37
42	38
42	39
42	40
43	1	Gadph	0.56957	-0.00235652
43	2	Gadph	0.572976	-0.0021714
43	3	Gadph	0.578907	0.000537203
43	4	Gadph	0.581825	0.000233803
43	5	Gadph	0.585294	0.000481507
43	6	Gadph	0.588248	0.000213274
43	7	Gadph	0.590568	-0.000688139
43	8	Gadph	0.594758	0.000280483
43	9	Gadph	0.596942	-0.000757842
43	10	Gadph	0.599355	-0.00156645
43	11	Gadph	0.602991	-0.00115239
43	12	Gadph	0.607305	-5.93131e-05
43	13	Gadph	0.613064	0.00247787
43	14	Gadph	0.620643	0.00683448
43	15	Gadph	0.638352	0.0213219
43	16	Gadph	0.670546	0.050294
43	17	Gadph	0.728394	0.10492
43	18	Gadph	0.836686	0.209991
43	19	Gadph	1.02991	0.39999
43	20	Gadph	1.35367	0.720535
43	21	Gadph	1.83107	1.19471
43	22	Gadph	2.43105	1.79147
43	23	Gadph	3.04384	2.40104
43	24	Gadph	3.59193	2.9459
43	25	Gadph	4.02625	3.377
43	26	Gadph	4.35549	3.70303
43	27	Gadph	4.6223	3.96661
43	28	Gadph	4.83285	4.17394
43	29	Gadph	4.99874	4.33661
43	30	Gadph	5.13699	4.47163
43	31	Gadph	5.25173	4.58315
43	32	Gadph	5.35435	4.68255
43	33	Gadph	5.44218	4.76716
43	34	Gadph	5.51877	4.84053
43	35	Gadph	5.58585	4.90439
43	36	Gadph	5.63192	4.94723
43	37	Gadph	5.68243	4.99453
43	38	Gadph	5.7252	5.03407
43	39	Gadph	5.75785	5.0635
43	40	Gadph	5.78009	5.08251
44	1	Gadph	0.557605	-0.000772651
44	2	Gadph	0.559878	-0.00115741
44	3	Gadph	0.564394	0.000702071
44	4	Gadph	0.567412	0.00106291
44	5	Gadph	0.569302	0.000294836
44	6	Gadph	0.569706	-0.00195858
44	7	Gadph	0.573468	-0.000853642
44	8	Gadph	0.576429	-0.000549666
44	9	Gadph	0.579996	0.00036031
44	10	Gadph	0.582142	-0.000150987
44	11	Gadph	0.585504	0.000553652
44	12	Gadph	0.588147	0.0005391
44	13	Gadph	0.59474	0.00447449
44	14	Gadph	0.607315	0.0143929
44	15	Gadph	0.62372	0.0281404
44	16	Gadph	0.657859	0.0596222
44	17	Gadph	0.722484	0.121589
44	18	Gadph	0.841628	0.238077
44	19	Gadph	1.0529	0.446688
44	20	Gadph	1.39688	0.78801
44	21	Gadph	1.88888	1.27735
44	22	Gadph	2.48429	1.87011
44	23	Gadph	3.08708	2.47024
44	24	Gadph	3.59891	2.97942
44	25	Gadph	3.99491	3.37276
44	26	Gadph	4.31198	3.68717
44	27	Gadph	4.55055	3.92308
44	28	Gadph	4.74429	4.11417
44	29	Gadph	4.90623	4.27344
44	30	Gadph	5.04648	4.41104
44	31	Gadph	5.14563	4.50753
44	32	Gadph	5.23858	4.59782
44	33	Gadph	5.31427	4.67086
44	34	Gadph	5.38424	4.73817
44	35	Gadph	5.43981	4.79108
44	36	Gadph	5.49538	4.844
44	37	Gadph	5.54496	4.89092
44	38	Gadph	5.58409	4.92739
44	39	Gadph	5.62149	4.96214
44	40	Gadph	5.63593	4.97392
45	1	Gadph	0.527719	-0.00143126
45	2	Gadph	0.530738	-0.00164942
45	3	Gadph	0.533519	-0.00210515
45	4	Gadph	0.539558	0.000696264
45	5	Gadph	0.543054	0.000955304
45	6	Gadph	0.545654	0.000319143
45	7	Gadph	0.548588	1.59329e-05
45	8	Gadph	0.552158	0.000348764
45	9	Gadph	0.556242	0.00119575
45	10	Gadph	0.558806	0.000522867
45	11	Gadph	0.560187	-0.0013334
45	12	Gadph	0.564142	-0.000615465
45	13	Gadph	0.571968	0.00397332
45	14	Gadph	0.583985	0.0127536
45	15	Gadph	0.603667	0.0291991
45	16	Gadph	0.641178	0.0634724
45	17	Gadph	0.71306	0.132118
45	18	Gadph	0.845158	0.260979
45	19	Gadph	1.07308	0.485659
45	20	Gadph	1.43982	0.849166
45	21	Gadph	1.9575	1.36361
45	22	Gadph	2.57823	1.9811
45	23	Gadph	3.1928	2.59243
45	24	Gadph	3.6893	3.0857
45	25	Gadph	4.07869	3.47185
45	26	Gadph	4.38618	3.7761
45	27	Gadph	4.6346	4.02128
45	28	Gadph	4.83281	4.21626
45	29	Gadph	4.99824	4.37845
45	30	Gadph	5.12671	4.50368
45	31	Gadph	5.22815	4.60189
45	32	Gadph	5.32116	4.69166
45	33	Gadph	5.39443	4.7617
45	34	Gadph	5.45626	4.82029
45	35	Gadph	5.50698	4.86777
45	36	Gadph	5.5655	4.92305
45	37	Gadph	5.61868	4.973
45	38	Gadph	5.66364	5.01472
45	39	Gadph	5.685	5.03284
45	40	Gadph	5.71406	5.05867
46	1	Gadph	0.506509	-0.00109553
46	2	Gadph	0.508279	-0.00205531
46	3	Gadph	0.511651	-0.00141208
46	4	Gadph	0.515168	-0.000624431
46	5	Gadph	0.519178	0.000656267
46	6	Gadph	0.522465	0.00121486
46	7	Gadph	0.524781	0.000801649
46	8	Gadph	0.528019	0.00130999
46	9	Gadph	0.530082	0.000643584
46	10	Gadph	0.53045	-0.00171696
46	11	Gadph	0.534547	-0.000349363
46	12	Gadph	0.535527	-0.00209801
46	13	Gadph	0.541929	0.0015745
46	14	Gadph	0.550195	0.00711091
46	15	Gadph	0.564579	0.0187657
46	16	Gadph	0.589216	0.0406742
46	17	Gadph	0.636559	0.0852879
46	18	Gadph	0.72224	0.16824
46	19	Gadph	0.879251	0.322521
46	20	Gadph	1.14906	0.589597
46	21	Gadph	1.56201	0.999821
46	22	Gadph	2.1127	1.54778
46	23	Gadph	2.72937	2.16172
46	24	Gadph	3.30233	2.73195
46	25	Gadph	3.76198	3.18887
46	26	Gadph	4.12168	3.54585
46	27	Gadph	4.41597	3.83741
46	28	Gadph	4.63319	4.05189
46	29	Gadph	4.80976	4.22574
46	30	Gadph	4.96775	4.381
46	31	Gadph	5.09539	4.50591
46	32	Gadph	5.19747	4.60527
46	33	Gadph	5.28333	4.68839
46	34	Gadph	5.36549	4.76783
46	35	Gadph	5.42053	4.82013
46	36	Gadph	5.47072	4.8676
46	37	Gadph	5.5306	4.92475
46	38	Gadph	5.58923	4.98065
46	39	Gadph	5.61673	5.00541
46	40	Gadph	5.65342	5.03938
47	1	Gadph	0.501872	0.000282271
47	2	Gadph	0.503003	-0.00176587
47	3	Gadph	0.508645	0.000696635
47	4	Gadph	0.512608	0.00147984
47	5	Gadph	0.514519	0.000211624
47	6	Gadph	0.515652	-0.00183502
47	7	Gadph	0.519675	-0.00099055
47	8	Gadph	0.524419	0.000574128
47	9	Gadph	0.526099	-0.000925469
47	10	Gadph	0.529385	-0.000819078
47	11	Gadph	0.533551	0.000167732
47	12	Gadph	0.536326	-0.000236391
47	13	Gadph	0.541418	0.00167656
47	14	Gadph	0.548306	0.00538527
47	15	Gadph	0.562124	0.0160239
47	16	Gadph	0.586864	0.0375846
47	17	Gadph	0.633693	0.0812344
47	18	Gadph	0.715765	0.160126
47	19	Gadph	0.869842	0.311025
47	20	Gadph	1.1317	0.569706
47	21	Gadph	1.53593	0.970757
47	22	Gadph	2.08182	1.51347
47	23	Gadph	2.6929	2.12137
47	24	Gadph	3.26998	2.69527
47	25	Gadph	3.73619	3.15829
47	26	Gadph	4.09793	3.51686
47	27	Gadph	4.39457	3.81031
47	28	Gadph	4.63092	4.04349
47	29	Gadph	4.81857	4.22796
47	30	Gadph	4.97299	4.3792
47	31	Gadph	5.10867	4.5117
47	32	Gadph	5.21747	4.61733
47	33	Gadph	5.30265	4.69932
47	34	Gadph	5.37537	4.76886
47	35	Gadph	5.43671	4.82702
47	36	Gadph	5.50056	4.88769
47	37	Gadph	5.55976	4.94372
47	38	Gadph	5.60211	4.98289
47	39	Gadph	5.64614	5.02373
47	40	Gadph	5.67548	5.0499
48	1	Gadph	0.479783	0.000246315
48	2	Gadph	0.481233	-0.00128843
48	3	Gadph	0.484998	-0.000508753
48	4	Gadph	0.489221	0.000729312
48	5	Gadph	0.491534	5.74654e-05
48	6	Gadph	0.492883	-0.00157828
48	7	Gadph	0.497997	0.000550698
48	8	Gadph	0.501239	0.000807581
48	9	Gadph	0.50352	0.000102981
48	10	Gadph	0.506858	0.000456006
48	11	Gadph	0.509733	0.000345844
48	12	Gadph	0.51167	-0.00070178
48	13	Gadph	0.515096	-0.000261076
48	14	Gadph	0.523553	0.00521044
48	15	Gadph	0.537699	0.0163717
48	16	Gadph	0.561499	0.0371868
48	17	Gadph	0.608446	0.0811487
48	18	Gadph	0.6924	0.162117
48	19	Gadph	0.840292	0.307024
48	20	Gadph	1.09658	0.560323
48	21	Gadph	1.49414	0.954898
48	22	Gadph	2.02124	1.47902
48	23	Gadph	2.61011	2.06491
48	24	Gadph	3.16417	2.61598
48	25	Gadph	3.62436	3.07318
48	26	Gadph	3.98549	3.43132
48	27	Gadph	4.26735	3.7102
48	28	Gadph	4.49481	3.93468
48	29	Gadph	4.68101	4.11789
48	30	Gadph	4.83605	4.26994
48	31	Gadph	4.95918	4.39009
48	32	Gadph	5.0594	4.48733
48	33	Gadph	5.14455	4.56949
48	34	Gadph	5.22118	4.64314
48	35	Gadph	5.2828	4.70177
48	36	Gadph	5.34124	4.75723
48	37	Gadph	5.41557	4.82857
48	38	Gadph	5.46354	4.87356
48	39	Gadph	5.49604	4.90307
48	40	Gadph	5.51752	4.92157
49	1	Sdha	0.165681	-0.0178944
49	2	Sdha	0.171961	-0.0145518
49	3	Sdha	0.182734	-0.00671688
49	4	Sdha	0.190898	-0.00149057
49	5	Sdha	0.19632	0.000994153
49	6	Sdha	0.199548	0.0012843
49	7	Sdha	0.203292	0.00209033
49	8	Sdha	0.207123	0.00298358
49	9	Sdha	0.210464	0.00338634
49	10	Sdha	0.212817	0.00280181
49	11	Sdha	0.214746	0.00179345
49	12	Sdha	0.216289	0.00039882
49	13	Sdha	0.21762	-0.00120832
49	14	Sdha	0.219264	-0.00250173
49	15	Sdha	0.222727	-0.00197709
49	16	Sdha	0.225807	-0.00183478
49	17	Sdha	0.228846	-0.00173323
49	18	Sdha	0.235247	0.00172981
49	19	Sdha	0.245034	0.00857839
49	20	Sdha	0.265049	0.0256557
49	21	Sdha	0.301867	0.0595366
49	22	Sdha	0.366956	0.121687
49	23	Sdha	0.480287	0.232081
49	24	Sdha	0.665199	0.414055
49	25	Sdha	0.938495	0.684413
49	26	Sdha	1.28914	1.03213
49	27	Sdha	1.67144	1.41148
49	28	Sdha	2.03443	1.77153
49	29	Sdha	2.3421	2.07626
49	30	Sdha	2.6028	2.33403
49	31	Sdha	2.81938	2.54767
49	32	Sdha	2.99641	2.72176
49	33	Sdha	3.13547	2.85789
49	34	Sdha	3.25345	2.97292
49	35	Sdha	3.34749	3.06403
49	36	Sdha	3.42813	3.14174
49	37	Sdha	3.49448	3.20514
49	38	Sdha	3.54859	3.25632
49	39	Sdha	3.59534	3.30013
49	40	Sdha	3.63105	3.3329
50	1	Sdha	0.18595	-0.0212111
50	2	Sdha	0.192652	-0.0181873
50	3	Sdha	0.204815	-0.0097031
50	4	Sdha	0.21466	-0.00353631
50	5	Sdha	0.222059	0.000183219
50	6	Sdha	0.228793	0.00323877
50	7	Sdha	0.233617	0.00438411
50	8	Sdha	0.235981	0.00306951
50	9	Sdha	0.240846	0.00425588
50	10	Sdha	0.244299	0.00403056
50	11	Sdha	0.246576	0.00262863
50	12	Sdha	0.248743	0.00111724
50	13	Sdha	0.251606	0.000301174
50	14	Sdha	0.25411	-0.000873642
50	15	Sdha	0.255476	-0.00318592
50	16	Sdha	0.259034	-0.00330711
50	17	Sdha	0.263417	-0.002603
50	18	Sdha	0.270812	0.00111322
50	19	Sdha	0.28364	0.0102635
50	20	Sdha	0.306438	0.0293821
50	21	Sdha	0.346033	0.065299
50	22	Sdha	0.418994	0.134581
50	23	Sdha	0.546487	0.258396
50	24	Sdha	0.749233	0.457462
50	25	Sdha	1.04433	0.748886
50	26	Sdha	1.41871	1.11958
50	27	Sdha	1.82124	1.51843
50	28	Sdha	2.19781	1.89133
50	29	Sdha	2.50996	2.1998
50	30	Sdha	2.77168	2.45784
50	31	Sdha	2.98601	2.66849
50	32	Sdha	3.15183	2.83063
50	33	Sdha	3.28307	2.95819
50	34	Sdha	3.39431	3.06575
50	35	Sdha	3.48678	3.15455
50	36	Sdha	3.56056	3.22464
50	37	Sdha	3.60725	3.26765
[truncated: 13,363 more rows]
