# Supplementary material for: Homeostatic plasticity in the retina is associated with maintenance of night vision during retinal degenerative disease
Source: eLife. 2020 Sep 22;9:e59422. doi: 10.7554/eLife.59422 (PMC7529457; doi:10.7554/eLife.59422)
Supplement: Figure 4—source data 1. [file elife-59422-fig4-data1.xlsx]

## Sheet: Figure 4E
Photoreceptor component amplitude data in control and P23H mice
Flash intensity	Amplitude (uV)	Amplitude (uV)	Amplitude (uV)	Amplitude (uV)		Flash intensity	Amplitude (uV)	Amplitude (uV)	Amplitude (uV)	Amplitude (uV)		Flash intensity	Amplitude (uV)	Amplitude (uV)	Amplitude (uV)		Flash intensity	Amplitude (uV)	Amplitude (uV)	Amplitude (uV)	Amplitude (uV)
photons/um^2	Control 1	Control 2	Control 3	Control 4		photons/um^2	1-mo P23H-1	1-mo P23H-2	1-mo P23H-3	1-mo P23H-4		photons/um^2	3-mo P23H-1	3-mo P23H-2	3-mo P23H-3		photons/um^2	5-mo P23H-1	5-mo P23H-2	5-mo P23H-3	5-mo P23H-3
2.2	26	14.6	10.9	19		2.2	7.4	11.2	7.4	4.4		2.2	1.6	4.7	5.8		2.2	1.8	1.6	1	0.7
5.7	58	33.6	26.4	46		5.7	18.7	27	18.8	11.6		5.7	4.1	10.6	13.8		5.7	2.9	4	1.8	3.5
16	119	69	61.8	108		16	44	61	47	29		16	13	24	30		16	7.4	11	5.3	10
39	184	124	120	197		39	77.5	104	85	55		39	21	45	57		39	14	20	8	18
124	272	232	222	325		124	146	177	164	105		124	43	84	112		124	33.5	41.6	24	38
369	328	313	292	391		369	184	225	232	143		369	68	120	144		369	53	61	42	45
885	347	365	335	422		885	197	255	267	164		885	82	137	160		885	61.6	69	48	52
1800	358	390	355	436		1800	197	270	283	172		1800	87	139	167		1800	66	77	58	55
3600	358	415	374	454		3600	197	278	298	180		3600	90	142	167		3600	72	79	68	57
7200	--	430	388	457								7200	90	146	167		7200	75	81	71	61
14400	358	436	393	460		14400	197	278	307	183		14400	90	146	167		14400	78	86	79	68
28800		436	393	460								28800	95	146	167		28800	79	90	79	77

## Sheet: Figure 4F
Photoreceptor component amplitude data in control and P23H mice
Flash intensity	Amplitude (uV)	Amplitude (uV)	Amplitude (uV)	Amplitude (uV)		Flash intensity	Amplitude (uV)	Amplitude (uV)	Amplitude (uV)	Amplitude (uV)		Flash intensity	Amplitude (uV)	Amplitude (uV)	Amplitude (uV)		Flash intensity	Amplitude (uV)	Amplitude (uV)	Amplitude (uV)	Amplitude (uV)
photons/um^2	Control 1	Control 2	Control 3	Control 4		photons/um^2	1-mo P23H-1	1-mo P23H-2	1-mo P23H-3	1-mo P23H-4		photons/um^2	3-mo P23H-1	3-mo P23H-2	3-mo P23H-3		photons/um^2	5-mo P23H-1	5-mo P23H-2	5-mo P23H-3	5-mo P23H-3
						0.5	102	100.6	157	63							0.5	5.4	5.2	1	2.7
2.2	276	258	71	194		2.2	205	202	308	135		2.2	12	66	91		2.2	14.7	15.3	6.2	15.9
5.7	532	453	135	338		5.7	361	362	537	271		5.7	31	130	161		5.7	43	45	23	46
16	848	679	217	509		16	576	573	848	462		16	78	225	254		16	96	101	63	91.4
39	1091	834	281	636		39	756	753	1110	627		39	108	312	314		39	145	151	109	134
124	1331	988	367	760		124	885	926	1340	759		124	180	403	383		124	212	220	188	190
369	1471	1098	460	881		369	936	1064	1445	817		369	250	477	457		369	276	286	273	248
885	1520	1158	528	965		885	973	1140	1460	830		885	305	536	518		885	337	344	323	310
1800	1532	1190	562	1013		1800	973	1150	1430	815		1800	344	573	546		1800	360	368	378	338
3600	1532	1198	571	1026		3600	995	1157	1430	800		3600	362	603	566		3600	390	393	407	357
7200	--	--	--	--		7200	--	--	--	--		7200	388	628	583		7200	410	416	435	382
14400	1532	1222	594	1067		14400	995	1157	1430	800		14400	422	658	600		14400	431	431	449	394
28800	--	--	--	--		28800		--	--	--		28800	434	658	619		28800	461	458	475	419

## Sheet: Figure 4G
Bipolar cell amplitude - photoreceptor response amplitude ratios
	Control-1	Control-2	Control-3	Control-4		Control-1	Control-2	Control-3	Control-4				Control-1	Control-2	Control-3	Control-4
Intensity	RPR	RPR	RPR	RPR		RBC	RBC	RBC	RBC				RPR/RBC	RPR/RBC	RPR/RBC	RPR/RBC
2.2	26	14.6	10.9	19		276	258	71	194				10.6154	17.6712	6.51376	10.2105
5.7	58	33.6	26.4	46		532	453	135	338				9.17241	13.4821	5.11364	7.34783
16	119	69	61.8	108		848	679	217	509				7.12605	9.84058	3.51133	4.71296
39	184	124	120	197		1091	834	281	636				5.92935	6.72581	2.34167	3.22843
124	272	232	222	325		1331	988	367	760				4.89338	4.25862	1.65315	2.33846
369	328	313	292	391		1471	1098	460	881				4.48476	3.50799	1.57534	2.2532
885	347	365	335	422		1520	1158	528	965				4.3804	3.1726	1.57612	2.28673
1800	358	390	355	436		1532	1190	562	1013				4.27933	3.05128	1.5831	2.32339
3600	358	415	374	454		1532	1198	571	1026				4.27933	2.88675	1.52674	2.25991
14400	358	436	393	460		1532	1222	594	1067				4.27933	2.80275	1.51145	2.31957
	1-mo P23H-1	1-mo P23H-2	1-mo P23H-3	1-mo P23H-4		1-mo P23H-1	1-mo P23H-2	1-mo P23H-3	1-mo P23H-4				1-mo P23H-1	1-mo P23H-2	1-mo P23H-3	1-mo P23H-4
	RPR	RPR	RPR	RPR		RBC	RBC	RBC	RBC				RPR/RBC	RPR/RBC	RPR/RBC	RPR/RBC
2.2	7.4	11.2	7.4	4.4		205	202	308	135				27.7027	18.0357	41.6216	30.6818
5.7	18.7	27	18.8	11.6		361	362	537	271				19.3048	13.4074	28.5638	23.3621
16	44	61	47	29		576	573	848	462				13.0909	9.39344	18.0426	15.931
39	77.5	104	85	55		756	753	1110	627				9.75484	7.24038	13.0588	11.4
124	146	177	164	105		885	926	1340	759				6.06164	5.23164	8.17073	7.22857
369	184	225	232	143		936	1064	1445	817				5.08696	4.72889	6.22845	5.71329
885	197	255	267	164		973	1140	1460	830				4.93909	4.47059	5.46816	5.06098
1800	197	270	283	172		973	1150	1430	815				4.93909	4.25926	5.053	4.73837
3600	197	278	298	180		995	1157	1430	800				5.05076	4.16187	4.79866	4.44444
14400	197	278	307	183		995	1157	1430	800				5.05076	4.16187	4.65798	4.37158
	3-mo P23H-1	3-mo P23H-2	3-mo P23H-3			3-mo P23H-1	3-mo P23H-2	3-mo P23H-3					3-mo P23H-1	3-mo P23H-2	3-mo P23H-3
	RPR	RPR	RPR			RBC	RBC	RBC					RPR/RBC	RPR/RBC	RPR/RBC
2.2	1.6	4.7	5.8			12	66	91					7.5	14.0426	15.6897
5.7	4.1	10.6	13.8			31	130	161					7.56098	12.2642	11.6667
16	13	24	30			78	225	254					6	9.375	8.46667
39	21	45	57			108	312	314					5.14286	6.93333	5.50877
124	43	84	112			180	403	383					4.18605	4.79762	3.41964
369	68	120	144			250	477	457					3.67647	3.975	3.17361
885	82	137	160			305	536	518					3.71951	3.91241	3.2375
1800	87	139	167			344	573	546					3.95402	4.1223	3.26946
3600	90	142	167			362	603	566					4.02222	4.24648	3.38922
14400	90	146	167			422	658	600					4.68889	4.50685	3.59281
	5-mo P23H-1	5-mo P23H-2	5-mo P23H-3	5-mo P23H-4		5-mo P23H-1	5-mo P23H-2	5-mo P23H-3	5-mo P23H-4				5-mo P23H-1	5-mo P23H-2	5-mo P23H-3	5-mo P23H-4
	RPR	RPR	RPR	RPR		RBC	RBC	RBC	RBC				RPR/RBC	RPR/RBC	RPR/RBC	RPR/RBC
2.2	1.8	1.6	1	0.7		14.7	15.3	6.2	15.9				8.16667	9.5625	6.2	22.7143
5.7	2.9	4	1.8	3.5		43	45	23	46				14.8276	11.25	12.7778	13.1429
16	7.4	11	5.3	10		96	101	63	91.4				12.973	9.18182	11.8868	9.14
39	14	20	8	18		145	151	109	134				10.3571	7.55	13.625	7.44444
124	33.5	41.6	24	38		212	220	188	190				6.32836	5.28846	7.83333	5
369	53	61	42	45		276	286	273	248				5.20755	4.68852	6.5	5.51111
885	61.6	69	48	52		337	344	323	310				5.47078	4.98551	6.72917	5.96154
1800	66	77	58	55		360	368	378	338				5.45455	4.77922	6.51724	6.14545
3600	72	79	68	57		390	393	407	357				5.41667	4.97468	5.98529	6.26316
14400	78	86	79	68		431	431	449	394				5.52564	5.01163	5.68354	5.79412
