# Supplementary material for: Homeostatic plasticity in the retina is associated with maintenance of night vision during retinal degenerative disease
Source: eLife. 2020 Sep 22;9:e59422. doi: 10.7554/eLife.59422 (PMC7529457; doi:10.7554/eLife.59422)
Supplement: Figure 5—figure supplement 1—source data 1. [file elife-59422-fig5-figsupp1-data1.xlsx]

## Sheet: Figure 5S1D
ON-Bipolar Cell component amplitude data in control and P23H mice without BaCl2		Control									HET
B-Wave Amplitude w/o BaCl2	Light Intensity (Photons/µm2)	M5-Ret1-WT	M5-Ret2-WT	M8-Ret1-WT	M9-Ret2-WT	M12-Ret1-WT	M12-Ret2-WT	M13-Ret1-WT	M13-Ret1-WT		M4-Ret2-Het	M7-Ret1-Het	M7-Ret2-Het	M10-Ret1-HET	M10-Ret2-HET	M11-Ret2-HET	M14-Ret1-HET	M15-Ret1-HET	M16-Ret1-HET	M16-Ret2-HET	M17-Ret1-HET	M17-Ret2-HET
	7.87917	164.124	43.8625	174.5	215.21	372.559	235.046	130.402	175.568		48.2177	90.271	145.66	77.3315	304.504	94.7571	126.312	89.2944	65.216	40.802	65.4907	122.497
	19.6979	337.219	145.132	241.364	326.599	489.716	367.432	251.617	276.611		142.731	157.623	253.51	151.825	525.94	162.018	264.313	176.392	136.139	100.739	122.192	219.971
	32.1727	426.374	228.152	252.38	356.576	480.477	390.494	303.214	304.26		219.029	190.473	302.168	182.364	625.218	185.372	335.17	219.683	174.778	139.335	136.936	252.773
	105.905	506.592	358.033	221.009	355.042	396.851	351.929	390.259	286.255		343.628	240.417	350.403	205.2	702.332	181.03	403.747	285.523	231.751	179.565	106.567	248.169
	873.059	556.641	401.136	308.79	429.688	478.516	388.489	358.887	303.345		304.565	292.664	415.344	268.859	701.599	193.481	426.026	322.266	283.203	200.806	229.797	265.503
	6984.47	651.55	542.438	420.872	545.349	723.572	531.616	404.053	443.42		410.156	315.857	481.262	309.449	808.106	270.691	477.295	340.881	306.091	211.487	322.571	354.92

## Sheet: Figure 5S1E
ON-Bipolar Cell component amplitude data in control and P23H mice with BaCl2		Control									HET
B-Wave Amplitude w/ BaCl2	Light Intensity (Photons/µm2)	M5-Ret1-WT	M5-Ret2-WT	M8-Ret1-WT	M9-Ret2-WT	M12-Ret1-WT	M12-Ret2-WT	M13-Ret1-WT	M13-Ret1-WT		M4-Ret2-Het	M7-Ret1-Het	M7-Ret2-Het	M10-Ret1-HET	M10-Ret2-HET	M11-Ret2-HET	M14-Ret1-HET	M15-Ret1-HET	M16-Ret1-HET	M16-Ret2-HET	M17-Ret1-HET	M17-Ret2-HET
	7.87917	177.216	282.806	288.361	275.299	602.325	355.469	219.177	334.625		107.483	332.581	267.731	50.1099	365.204	78.2776	149.444	78.0335	91.4611	278.137	118.042	147.797
	19.6979	283.508	389.435	351.257	380.829	712.86	488.342	332.855	482.758		231.323	466.522	376.678	83.9844	558.533	116.821	267.945	132.324	185.943	493.896	191.712	232.636
	32.1727	317.601	408.238	357.23	403.006	696.324	500.445	362.418	504.412		291.617	500.357	402.396	97.3947	629.839	123.814	314.724	152.326	237.035	584.194	208.871	251.944
	105.905	358.215	434.021	372.681	432.068	644.47	481.384	402.161	487.488		328.125	569.275	439.758	114.929	673.584	115.112	365.173	178.223	317.688	677.124	209.838	235.901
	873.059	433.655	551.453	471.191	529.48	812.683	581.97	432.434	535.583		351.257	680.542	546.265	152.588	749.817	157.776	429.077	210.266	386.047	770.874	310.058	284.424
	6984.47	495.3	635.681	596.008	606.995	1053.16	751.953	507.202	674.438		425.72	773.926	616.455	175.171	919.8	207.214	473.633	235.291	430.603	820.007	410.156	373.535

## Sheet: Figure 5S1F
Muller Glia Component		Control									HET
Slow P-III Amplitude	Light Intensity (Photons/µm2)	M5-Ret1-WT	M5-Ret2-WT	M8-Ret1-WT	M9-Ret2-WT	M12-Ret1-WT	M12-Ret2-WT	M13-Ret1-WT	M13-Ret1-WT		M4-Ret2-Het	M7-Ret1-Het	M7-Ret2-Het	M10-Ret1-HET	M10-Ret2-HET	M11-Ret2-HET	M14-Ret1-HET	M15-Ret1-HET	M16-Ret1-HET	M16-Ret2-HET	M17-Ret1-HET	M17-Ret2-HET
	7.87917	161.136	210.759	163.699	73.1042	21.1784	21.6586	118.843	22.0755		73.6947	233.667	129.481	15.0629	124.757	22.1969	74.7311	21.7734	10.7311	251.299	42.6107	5.49548
	19.6979	244.195	266.995	170.918	85.7183	54.5277	37.6358	139.093	27.9844		115.583	275.924	140.344	23.8574	149.322	21.6449	68.072	30.388	14.7864	416.209	74.7048	14.3743
	32.1727	259.349	241.46	155.103	103.702	81.9442	52.4459	134.17	30.3004		111.93	259.815	132.429	29.9864	155.253	19.69	57.2148	32.714	18.2689	473.643	90.9003	20.2305
	105.905	227.646	180.358	184.398	133.968	176.586	108.577	121.619	57.4652		88.9608	241.183	141.45	41.9309	122.522	30.2589	59.39	31.1509	27.9145	490.847	108.537	48.2715
	873.059	242.441	214.334	251.504	263.236	378.126	243.235	196.903	153.206		104.581	248.795	184.279	63.5502	157.91	47.9283	157.952	59.7	57.2547	492.189	196.489	106.93
	6984.47	275.183	261.101	342.323	385.957	595.546	368.938	269.549	231.161		147.801	291.51	227.668	111.858	242.082	90.9502	230.146	117.054	108.355	497.667	288.459	161.657
