# Supplementary material for: Homeostatic plasticity in the retina is associated with maintenance of night vision during retinal degenerative disease
Source: eLife. 2020 Sep 22;9:e59422. doi: 10.7554/eLife.59422 (PMC7529457; doi:10.7554/eLife.59422)
Supplement: Figure 5—source data 1. [file elife-59422-fig5-data1.xlsx]

## Sheet: Figure 5A
Photoreceptor component amplitude data in control and P23H mice	M# indicates individual mouse, both retinas were used from some mice as indicated by Ret1, Ret2	6 Month HET					5 Month HET																			1 Month HET							Pooled Control
RPR amplitude	Light Intensity (Photons/µm2)	M18-Ret1-HET	M18-Ret2-HET	M19-Ret1-HET	M19-Ret2-HET		M2-Ret2-HET	M3-Ret1-HET-5MO	M3-Ret2-HET	M4-Ret2-HET	M7-Ret1-HET	M7-Ret2-HET	M21-Ret1-HET	M21-Ret2-HET	M22-Ret1-HET	M22-Ret2-HET	M23-Ret1-HET	M23-Ret2-HET	M8-Ret1-HET	M8-Ret2-HET	M9-Ret1-HET	M11-Ret2-HET	M12-Ret1-HET	M12-Ret2-HET		M30-Ret1-HET	M32-Ret1-HET	M32-Ret2-HET	M34-Ret1-HET	M35-Ret1-HET	M35-Ret2-HET		M20-Ret1-WT	M20-Ret2-WT	M1-Ret1-WT	M1-Ret2-WT	M6-Ret1-WT	M24-Ret1-WT	M24-Ret2-WT	M16-Ret2-WT	M16-Ret1-WT	M31-Ret1-WT	M33-Ret1-WT
	17.2197	2.67256	3.18094	1.99659	2.73317		20.4407	3.05288	2.7096	28.4825	11.2335	11.1058	5.41876	4.34162	6.4573	6.23569	5.83057	18.8622	37.3443	11.1332	5.42041	1.3316	6.54637	3.09326		5.7066	7.94365	5.09661	5.67021	7.3656	2.21395		142.739	13.0088	70.677	45.8623	42.3734	18.8349	10.6341	67.5641	62.5462	40.9222	20.0317
	43.0492	6.55879	5.43325	6.83478	7.22188		64.4103	8.96588	7.84927	91.0649	36.1258	27.4469	24.5519	18.7483	22.0169	23.2579	23.5001	71.2498	94.1679	32.4268	15.7271	5.42034	20.6283	10.5214		36.4704	58.0425	35.41	34.9568	41.8724	11.1026		381.966	38.7375	183.878	126.705	102.216	70.8304	33.9963	186.712	205.697	184.759	102.037
	132.018	13.9873	16.563	14.8607	16.1165		127.652	18.596	19.9188	208.135	78.258	62.2511	62.4623	46.1546	59.4401	64.6689	66.0239	171.401	151.476	88.5469	35.3501	12.94	50.0628	25.633		100.05	148.832	106.64	93.4438	101.966	32.1023		683.381	178.981	285.652	210.714	240.953	161.374	91.2833	330.215	463.87	404.299	232.236
	338.654	28.76	22.4717	14.8368	27.906		159.422	27.5918	34.837	307.016	116.106	86.4612	97.8146	74.2956	93.9721	100.493	116.088	262.536	208.468	143.462	61.2115	22.1497	78.8991	46.5545		147.815	218.32	178.139	146.78	139.369	59.2478		788.388	408.289	319.07	233.9	--	262.199	162.92	377.65	661.716	530.538	318.896
	2410.76	52.4166	43.778	23.3031	43.33		203.395	40.4532	66.9865	366.53	165.178	116.139	144.73	107.517	132.919	143.49	197.665	336.216	228.605	187.719	99.6288	46.1787	125.893	110.242		194.679	277.944	314.255	222.135	174.341	97.7005		918.554	633.496	347.421	258.917	417.024	382.775	243.75	444.605	858.12	615.117	413.438
	19286.1	71.1771	45.5197	37.506	61.6835		227.061	51.4115	93.1116	391.308	193.457	132.348	170.369	121.358	146.629	162.18	227.846	347.399	180.286	209.449	110.528	59.473	152.237	146.145		205.917	295.878	369.084	254.05	187.458	113.398		1042.18	632.82	350.11	267.635	494.89	407.325	268.423	525.093	922.341	646.838	429.816

## Sheet: Figure 5B
ON-Bipolar Cell component amplitude data in control and P23H mice	M# indicates individual mouse, both retinas were used from some mice as indicated by Ret1, Ret2	6 Month HET					5 Month HET																			1 Month HET							Pooled Control
RBC amplitude	Light Intensity (Photons/µm2)	M18-Ret1-HET	M18-Ret2-HET	M19-Ret1-HET	M19-Ret2-HET		M2-Ret2-HET	M3-Ret1-HET-5MO	M3-Ret2-HET	M4-Ret2-HET	M7-Ret1-HET	M7-Ret2-HET	M21-Ret1-HET	M21-Ret2-HET	M22-Ret1-HET	M22-Ret2-HET	M23-Ret1-HET	M23-Ret2-HET	M8-Ret1-HET	M8-Ret2-HET	M9-Ret1-HET	M11-Ret2-HET	M12-Ret1-HET	M12-Ret2-HET		M30-Ret1-HET	M32-Ret1-HET	M32-Ret2-HET	M34-Ret1-HET	M35-Ret1-HET	M35-Ret2-HET		M20-Ret1-WT	M20-Ret2-WT	M1-Ret1-WT	M1-Ret2-WT	M6-Ret1-WT	M24-Ret1-WT	M24-Ret2-WT	M16-Ret2-WT	M16-Ret1-WT	M31-Ret1-WT	M33-Ret1-WT
	17.2197	23.5297	18.1357	9.63613	25.157		308.505	29.1645	20.2818	347.334	146.097	185.943	71.2411	43.2041	87.8131	75.1108	75.4867	167.909	191.682	191.694	70.4767	47.4063	99.7741	33.1462		67.7097	85.9478	59.5959	49.457	107.477	37.5782		209.186	42.6496	396.189	105.107	125.417	101.51	83.8829	515.344	171.887	549.199	230.771
	43.0492	75.1576	59.9691	49.6133	86.0587		603.725	71.0188	85.273	609.787	395.165	325.779	231.786	156.518	234.553	235.574	262.312	408.829	451.5	454.217	238.68	128.322	219.355	111.24		307.492	355.934	318.417	254.47	401.312	165.25		487.567	115.161	590.371	150.439	283.65	315.237	313.46	742.88	444.583	1391.55	993.541
	132.018	144.273	100.477	109.612	147.165		722.913	99.5588	167.429	731.295	613.665	379.435	382.343	261.499	343.951	370.761	458.267	515.654	607.445	586.268	375.011	192.312	321.373	221.869		502.992	548.44	607.485	481.571	603.938	245.012		753.242	245.131	677.228	147.884	357.431	479.771	434.893	783.189	588.192	1705.22	1461.64
	338.654	185.519	117.447	136.637	177.47		754.57	113.821	213.533	804.153	722.964	399.406	447.24	305.947	389.287	412.469	542.132	533.553	665.698	618.317	427.189	220.183	417.383	300.776		568.546	602.973	752.13	586.209	663.687	279.729		870.626	433.033	706.056	145.713	--	532.339	462.262	780.192	622.619	1773.62	1647.87
	2410.76	234.147	152.698	163.042	206.97		787.427	132.499	264.348	853.423	805.594	422.632	493.488	335.244	427.193	448.64	599.489	540.136	711.145	634.776	456.622	252.486	556.081	381.956		595.8	634.512	907.606	676.093	708.096	325.505		926.197	653.141	717.967	145.668	432.034	550.483	477.522	783.056	630.323	1798.5	1774.4
	19286.1	261.163	165.414	203.29	239.952		895.389	149.533	296.289	942.27	821.853	424.66	523.591	354.348	460.002	481.578	638.574	562.947	755.869	652.988	467.371	258.893	578.805	393.734		604.289	671.04	947.618	700.528	731.33	356.039		1031.76	660.645	719.336	147.135	436.387	572.991	483.674	830.196	582.953	1819.38	1811.99

## Sheet: Figure 5C
Bipolar cell amplitude - photoreceptor response amplitude ratios	M# indicates individual mouse, both retinas were used from some mice as indicated by Ret1, Ret2	6 Month HET					5 Month HET																			1 Month HET							Pooled Control
RBC/RPR ratio	Light Intensity (Photons/µm2)	M18-Ret1-HET	M18-Ret2-HET	M19-Ret1-HET	M19-Ret2-HET		M2-Ret2-HET	M3-Ret1-HET-5MO	M3-Ret2-HET	M4-Ret2-HET	M7-Ret1-HET	M7-Ret2-HET	M21-Ret1-HET	M21-Ret2-HET	M22-Ret1-HET	M22-Ret2-HET	M23-Ret1-HET	M23-Ret2-HET	M8-Ret1-HET	M8-Ret2-HET	M9-Ret1-HET	M11-Ret2-HET	M12-Ret1-HET	M12-Ret2-HET		M30-Ret1-HET	M32-Ret1-HET	M32-Ret2-HET	M34-Ret1-HET	M35-Ret1-HET	M35-Ret2-HET		M20-Ret1-WT	M20-Ret2-WT	M1-Ret1-WT	M1-Ret2-WT	M6-Ret1-WT	M24-Ret1-WT	M24-Ret2-WT	M16-Ret2-WT	M16-Ret1-WT	M31-Ret1-WT	M33-Ret1-WT
	13.2592	8.80417	5.70136	4.82628	9.20431		15.0927	9.55312	7.48515	12.1947	13.0054	16.7429	13.1471	9.95114	13.5991	12.0453	12.9467	8.9019	5.13282	17.2182	13.0021	35.6009	15.2411	10.7156		11.8652	10.8197	11.6933	8.72225	14.5917	16.9734		1.46552	3.27851	5.60562	2.29178	2.95982	5.38948	7.88812	7.62748	2.74816	13.4206	11.5203
	33.1479	11.4591	11.0374	7.25894	11.9164		9.37312	7.92101	10.8638	6.69618	10.9386	11.8694	9.44068	8.34836	10.6533	10.1288	11.1622	5.73797	4.79463	14.0075	15.1763	23.6743	10.6337	10.5728		8.43129	6.13229	8.99228	7.27956	9.58415	14.8839		1.27647	2.97286	3.21067	1.18731	2.77501	4.45059	9.2204	3.97875	2.16135	7.53169	9.73707
	101.654	10.3146	6.06639	7.37598	9.13131		5.66316	5.35377	8.40557	3.51357	7.84157	6.09523	6.12119	5.66573	5.78651	5.73322	6.94093	3.00847	4.01017	6.62098	10.6085	14.8618	6.41941	8.6556		5.02741	3.68496	5.6966	5.15359	5.92296	7.63224		1.10223	1.36959	2.37081	0.70182	1.4834	2.97305	4.76421	2.37175	1.26801	4.21772	6.29377
	260.764	6.45058	5.22642	9.20935	6.35955		4.73315	4.12519	6.12949	2.61925	6.22675	4.61948	4.57232	4.11797	4.14258	4.10447	4.67001	2.0323	3.19329	4.30997	6.9789	9.94066	5.29008	6.46071		3.84635	2.76188	4.22216	3.99379	4.7621	4.72135		1.10431	1.0606	2.21286	0.62297	--	2.03029	2.83736	2.06591	0.94092	3.34306	5.16742
	1856.28	4.46704	3.488	6.99659	4.7766		3.87142	3.27536	3.94629	2.32838	4.87712	3.63903	3.40972	3.11805	3.21394	3.12663	3.03285	1.60651	3.11081	3.38151	4.58324	5.46759	4.41708	3.4647		3.06043	2.28288	2.88812	3.04361	4.06155	3.33166		1.00832	1.03101	2.06656	0.56261	1.03599	1.43814	1.95907	1.76124	0.73454	2.92383	4.29181
	14850.3	3.6692	3.6339	5.4202	3.89005		3.94338	2.90855	3.18208	2.408	4.24824	3.20865	3.07327	2.91985	3.13718	2.96941	2.80266	1.62046	4.19261	3.11765	4.22853	4.35312	3.802	2.69413		2.93463	2.26796	2.56749	2.75744	3.9013	3.13973		0.99	1.04397	2.0546	0.54976	0.88179	1.40672	1.80191	1.58105	0.63204	2.81272	4.21574
RBC amplitude	Light Intensity (Photons/µm2)	M18-Ret1-HET	M18-Ret2-HET	M19-Ret1-HET	M19-Ret2-HET		M2-Ret2-HET	M3-Ret1-HET-5MO	M3-Ret2-HET	M4-Ret2-HET	M7-Ret1-HET	M7-Ret2-HET	M21-Ret1-HET	M21-Ret2-HET	M22-Ret1-HET	M22-Ret2-HET	M23-Ret1-HET	M23-Ret2-HET	M8-Ret1-HET	M8-Ret2-HET	M9-Ret1-HET	M11-Ret2-HET	M12-Ret1-HET	M12-Ret2-HET		M30-Ret1-HET	M32-Ret1-HET	M32-Ret2-HET	M34-Ret1-HET	M35-Ret1-HET	M35-Ret2-HET		M20-Ret1-WT	M20-Ret2-WT	M1-Ret1-WT	M1-Ret2-WT	M6-Ret1-WT	M24-Ret1-WT	M24-Ret2-WT	M16-Ret2-WT	M16-Ret1-WT	M31-Ret1-WT	M33-Ret1-WT
	13.2592	23.5297	18.1357	9.63613	25.157		308.505	29.1645	20.2818	347.334	146.097	185.943	71.2411	43.2041	87.8131	75.1108	75.4867	167.909	191.682	191.694	70.4767	47.4063	99.7741	33.1462		67.7097	85.9478	59.5959	49.457	107.477	37.5782		209.186	42.6496	396.189	105.107	125.417	101.51	83.8829	515.344	171.887	549.199	230.771
	33.1479	75.1576	59.9691	49.6133	86.0587		603.725	71.0188	85.273	609.787	395.165	325.779	231.786	156.518	234.553	235.574	262.312	408.829	451.5	454.217	238.68	128.322	219.355	111.24		307.492	355.934	318.417	254.47	401.312	165.25		487.567	115.161	590.371	150.439	283.65	315.237	313.46	742.88	444.583	1391.55	993.541
	101.654	144.273	100.477	109.612	147.165		722.913	99.5588	167.429	731.295	613.665	379.435	382.343	261.499	343.951	370.761	458.267	515.654	607.445	586.268	375.011	192.312	321.373	221.869		502.992	548.44	607.485	481.571	603.938	245.012		753.242	245.131	677.228	147.884	357.431	479.771	434.893	783.189	588.192	1705.22	1461.64
	260.764	185.519	117.447	136.637	177.47		754.57	113.821	213.533	804.153	722.964	399.406	447.24	305.947	389.287	412.469	542.132	533.553	665.698	618.317	427.189	220.183	417.383	300.776		568.546	602.973	752.13	586.209	663.687	279.729		870.626	433.033	706.056	145.713	--	532.339	462.262	780.192	622.619	1773.62	1647.87
	1856.28	234.147	152.698	163.042	206.97		787.427	132.499	264.348	853.423	805.594	422.632	493.488	335.244	427.193	448.64	599.489	540.136	711.145	634.776	456.622	252.486	556.081	381.956		595.8	634.512	907.606	676.093	708.096	325.505		926.197	653.141	717.967	145.668	432.034	550.483	477.522	783.056	630.323	1798.5	1774.4
	14850.3	261.163	165.414	203.29	239.952		895.389	149.533	296.289	942.27	821.853	424.66	523.591	354.348	460.002	481.578	638.574	562.947	755.869	652.988	467.371	258.893	578.805	393.734		604.289	671.04	947.618	700.528	731.33	356.039		1031.76	660.645	719.336	147.135	436.387	572.991	483.674	830.196	582.953	1819.38	1811.99
RPR amplitude	Light Intensity (Photons/µm2)	M18-Ret1-HET	M18-Ret2-HET	M19-Ret1-HET	M19-Ret2-HET		M2-Ret2-HET	M3-Ret1-HET-5MO	M3-Ret2-HET	M4-Ret2-HET	M7-Ret1-HET	M7-Ret2-HET	M21-Ret1-HET	M21-Ret2-HET	M22-Ret1-HET	M22-Ret2-HET	M23-Ret1-HET	M23-Ret2-HET	M8-Ret1-HET	M8-Ret2-HET	M9-Ret1-HET	M11-Ret2-HET	M12-Ret1-HET	M12-Ret2-HET		M30-Ret1-HET	M32-Ret1-HET	M32-Ret2-HET	M34-Ret1-HET	M35-Ret1-HET	M35-Ret2-HET		M20-Ret1-WT	M20-Ret2-WT	M1-Ret1-WT	M1-Ret2-WT	M6-Ret1-WT	M24-Ret1-WT	M24-Ret2-WT	M16-Ret2-WT	M16-Ret1-WT	M31-Ret1-WT	M33-Ret1-WT
	13.2592	2.67256	3.18094	1.99659	2.73317		20.4407	3.05288	2.7096	28.4825	11.2335	11.1058	5.41876	4.34162	6.4573	6.23569	5.83057	18.8622	37.3443	11.1332	5.42041	1.3316	6.54637	3.09326		5.7066	7.94365	5.09661	5.67021	7.3656	2.21395		142.739	13.0088	70.677	45.8623	42.3734	18.8349	10.6341	67.5641	62.5462	40.9222	20.0317
	33.1479	6.55879	5.43325	6.83478	7.22188		64.4103	8.96588	7.84927	91.0649	36.1258	27.4469	24.5519	18.7483	22.0169	23.2579	23.5001	71.2498	94.1679	32.4268	15.7271	5.42034	20.6283	10.5214		36.4704	58.0425	35.41	34.9568	41.8724	11.1026		381.966	38.7375	183.878	126.705	102.216	70.8304	33.9963	186.712	205.697	184.759	102.037
	101.654	13.9873	16.563	14.8607	16.1165		127.652	18.596	19.9188	208.135	78.258	62.2511	62.4623	46.1546	59.4401	64.6689	66.0239	171.401	151.476	88.5469	35.3501	12.94	50.0628	25.633		100.05	148.832	106.64	93.4438	101.966	32.1023		683.381	178.981	285.652	210.714	240.953	161.374	91.2833	330.215	463.87	404.299	232.236
	260.764	28.76	22.4717	14.8368	27.906		159.422	27.5918	34.837	307.016	116.106	86.4612	97.8146	74.2956	93.9721	100.493	116.088	262.536	208.468	143.462	61.2115	22.1497	78.8991	46.5545		147.815	218.32	178.139	146.78	139.369	59.2478		788.388	408.289	319.07	233.9	--	262.199	162.92	377.65	661.716	530.538	318.896
	1856.28	52.4166	43.778	23.3031	43.33		203.395	40.4532	66.9865	366.53	165.178	116.139	144.73	107.517	132.919	143.49	197.665	336.216	228.605	187.719	99.6288	46.1787	125.893	110.242		194.679	277.944	314.255	222.135	174.341	97.7005		918.554	633.496	347.421	258.917	417.024	382.775	243.75	444.605	858.12	615.117	413.438
	14850.3	71.1771	45.5197	37.506	61.6835		227.061	51.4115	93.1116	391.308	193.457	132.348	170.369	121.358	146.629	162.18	227.846	347.399	180.286	209.449	110.528	59.473	152.237	146.145		205.917	295.878	369.084	254.05	187.458	113.398		1042.18	632.82	350.11	267.635	494.89	407.325	268.423	525.093	922.341	646.838	429.816
