# Supplementary material for: Homeostatic plasticity in the retina is associated with maintenance of night vision during retinal degenerative disease
Source: eLife. 2020 Sep 22;9:e59422. doi: 10.7554/eLife.59422 (PMC7529457; doi:10.7554/eLife.59422)
Supplement: Figure 6—source data 1. [file elife-59422-fig6-data1.xlsx]

## Sheet: Figure 6B
Meclofenamic Acid							TPMPA						D2/D4 Antagonist						Picrotoxin/Strychnine
	B-Wave Amplitude		A-Wave Amplitude				B-Wave Amplitude		A-Wave Amplitude				B-Wave Amplitude		A-Wave Amplitude				B-Wave Amplitude		A-Wave Amplitude
	Control	Drug	Control	Drug			Control	Drug	Control	Drug			Control	Drug	Control	Drug			Control	Drug	Control	Drug
M1R1-P23H	348.879	381.605	77.7039	26.0715		M1R1-Gnat2	167.415	141.307	32.9073	32.738		M3R1-C57	932.706	813.13	239.917	291.278		M7R1	278	248	533	508
M1R2-P23H	196.713	169.301	87.555	33.598		M1R2-Gnat2	337.887	341.807	110.173	110.624		M3R2-C57	1518.41	2033.59	244.035	203.636		M7R2	215	209	426	480
M2R1-P23H	156.192	104.747	22.8953	25.9439		M2R1-Gnat2	123.99	85.6969	104.284	85.3359		M4R1-C57	1179.06	1247.36	232.792	186.158		M10R1	303	192	596	516
																		M10R2	147	168	383	501
																		M11R1	67	111	428	428
																		M11R2	77	98	395	464
M# indicates indivdual mouse, both retinas used from some mice as indicated by R1 or R2, and genotype is indicated in the name (P23H, Gnat2, C57)
