# Supplementary material for: Homeostatic plasticity in the retina is associated with maintenance of night vision during retinal degenerative disease
Source: eLife. 2020 Sep 22;9:e59422. doi: 10.7554/eLife.59422 (PMC7529457; doi:10.7554/eLife.59422)
Supplement: Figure 7—figure supplement 1—source data 1. [file elife-59422-fig7-figsupp1-data1.xlsx]

## Sheet: Sheet1
Contrast threshold (CT) data in % in control (C57Bl/6J), and 3- and 5-mo littermate P23H mice
Contrast sensitivity in Figure is calculated using formula 1/CT
																	second exp. with mouse #5
	3-mo Control-1	3-mo Control-2	3-mo Control-3	5-mo Control-1	5-mo Control-2		3-mo P23H-1	3-mo P23H-2	3-mo P23H-3	3-mo P23H-4		5-mo P23H-1	5-mo P23H-2	5-mo P23H-3	5-mo P23H-4	5-mo P23H-5	5-mo P23H-5
Scotopic	60.2	90.6	93.8	82.8	41.8		81.3	90.6	69.8	52.2		87.5	57.8	57.8	96.9	96.9	96.9
Mesopic	6.2	81.2	25	73.2	27		35.5	82.8	30.5	56.2		39.8	21.1	51.8	72.7	87.5	44.9
Photopic		2.8	10	11.3	2.4		4.1	3.8	7.8	6.3		8.4	2.1	2.3	81.3	6.7	5.3
