# Supplementary material for: Homeostatic plasticity in the retina is associated with maintenance of night vision during retinal degenerative disease
Source: eLife. 2020 Sep 22;9:e59422. doi: 10.7554/eLife.59422 (PMC7529457; doi:10.7554/eLife.59422)
Supplement: Figure 7—source data 1. [file elife-59422-fig7-data1.xlsx]

## Sheet: Sheet1
Contrast threshold (CT) data in % in control (Gnat2-/-), and 3- and 5-mo littermate P23H mice
Contrast sensitivity in Figure is calculated using formula 1/CT
Luminance (Cd/m^2)	2-mo control mouse 1	2-mo control mouse 1	2-mo control mouse 1	2-mo control mouse 1	2-mo control mouse 1		2-mo contro mouse 2	2-mo control mouse 2		2-mo control mouse 3	2-mo control mouse 3	2-mo control mouse 3		2-mo control mouse 4	2-mo control mouse 4
0.0005			80.7	68	34.8		81.1	77		56.2	74	60.2		53.1	45.6
0.0036	38.6	13.8	14.3	18.8	11.8		13.1	10.3		41.3	10.3	31.8		14.7	14.5
0.042	12.7	5.2	9	6.2	6.9		5	6.2		4.7	6.9	7.4		1.3	5.4
0.545	8.7	8.4	4.7	3.9	5.9		6.3	7		7.3	8.5	8.1		3.5	7.6
7.2	3.8	5.5	4.2	3.8	5.4		6.4	3.1		5	2	9.3		3.4	10.4
	2-mo P23H mouse 1	2-mo P23H mouse 2	2-mo P23H mouse 3	2-mo P23H mouse 4	2-mo P23H mouse 5	2-mo P23H mouse 6	2-mo P23H mouse 7	2-mo P23H mouse 8	2-mo P23H mouse 9	2-mo P23H mouse 10		2-mo P23H mouse 11	2-mo P23H mouse 11
0.0005				67	70.7	92.2	69.9	78.9	66.6	59.4	63	81.2	87.1
0.0036	13.8	39.6	52.5	16.9	19.5	15.8	18.8	14.1	19.6	26.7	23.15	11.1	21
0.042	5.5	10.8	36.5	9.2	5.6	11.9	11.8	10.6	9.1	4.7	6.9	7.9	4.2
0.545	4.6	13.6	10.7	6.1	8.6	9.3	10.5	7.8	9.8	4.8	7.3	4.7	8.8
7.2	5.9	10.9	5.1	5.3	5.9	6	8.5		6.1	8.5	7.3		5.4
	3-mo control mouse 1	3-mo control mouse 1	3-mo control mouse 1		3-mo control mouse 2	3-mo control mouse 2	3-mo control mouse 2	3-mo control mouse 2	3-mo control mouse 2	3-mo control mouse 2	3-mo control mouse 2	3-mo control mouse 2
0.0005					75.4	74	87.3	69.4	65.4	45.5	43.4	55.3
0.0036	22.3	30.1	22.9		12.9	8.9	17	18.9	21.7	22.6	61	21.8
0.042	10.1	6.2	9.9		3	10.1	5.9	11	8.4	8.1	11.3	9.2
0.545	3.7	8	7.2		7	4.7	11.1	4.7	7.7	5.9	7.9	5.2
7.2	4.9	4.2	4.3		9.9	6.2	4.9	7.6	8.7	4.2	6.9	5.7
	3-mo P23H mouse 1	3-mo P23H mouse 1		3-mo P23H mouse 2	3-mo P23H mouse 2	3-mo P23H mouse 2		3-mo P23H mouse 3	3-mo P23H mouse 3		3-mo P23H mouse 4	3-mo P23H mouse 4		3-mo P23H mouse 5	3-mo P23H mouse 5	3-mo P23H mouse 5		3-mo P23H mouse 6
0.0005								80.9			76.2	90.6		85.5	82.4	86.7		96.9
0.0036	50.8	24.6		17	10.1	17.6		15.9	21.4		10.7	30.3		25.4	28.6	33		29.4
0.042	16.3	4.8		4.7	6.3	6.4		15.6	7.5		14.8	11.5		8.8	9.1	11		11.7
0.545	5.6	5		6.3	5.4	7.8		9	6.5		6.2	9.9		7.5	9.9	6.5		4.2
7.2	7.3	7.7		5	5.1	3.5		27.9			9.3	10		8.5	6.6	5.2		5.3
	6-mo control mouse 1	6-mo control mouse 2	6-mo control mouse 3	5-mo control 1	5-mo control 1		5-mo control 2	5-mo control 3	5-mo control 4	5-mo control 5	5-mo control 6		5-mo control 6	5-mo control 6	5-mo control 6	5-mo control 6	5-mo control 6	5-mo control 6	5-mo control 6
0.0005	75.4	63.7	53.9										33.6	47.7	68.6	63.5	35.4	41.5	42.8
0.0036	29.3	19.1	23.8	22.1	29.3		25.4	11.8	12.1	22.4	26.5		15.6	21	26	22.5	37.9	11.3	16.7
0.042	17.6	2.8	18.1	11.3	11.2		10.8	5.2	4.1	8.4	8.5		10.1	7.5	10	10.5	10.5	8.3	13.6
0.545	12.9	6	4	3.6	6.7		10.7	8.1	3.8	5.3	6.9		12.4	7.1	13.9	3.6	6.1	3.1	10.9
7.2	5.9	4.9	13.9	5.6	2.8		7.3	4	4.3	3.4	6		14.8		6.2	5.2	9.9	6.3	2.2
	5-mo P23H mouse 1	5-mo P23H mouse 2	5-mo P23H mouse 3	5-mo P23H mouse 2	5-mo P23H mouse 4	5-mo P23H mouse 1	5-mo P23H mouse 2	5-mo P23H mouse 3	5-mo P23H mouse 2	1/10/19 test on 6/12/19, 0	5-mo P23H mouse 3	5-mo P23H mouse 2	5-mo P23H mouse 2	5-mo P23H mouse 1	5-mo P23H mouse 4	5-mo P23H mouse 2	5-mo P23H mouse 1	5-mo P23H mouse 2	5-mo P23H mouse 2	5-mo P23H mouse 1	5-mo P23H mouse 1	5-mo P23H mouse 2	5-mo P23H mouse 2	5-mo P23H mouse 1	5-mo P23H mouse 2
0.0005	78.1	71.5	85	70.9	70.3	60.2	64.1	71.3	92.2	84.4	76.2	81.4	92.2	80.5	89.6	80.7	95.3	96.9	86.7	84.4	95.3	91.4	81.2	84.4	87.7
0.0036	39.1	20.1	21.5	26.2	23.5	17.3	48	23.3	43.5	33.2	29.1	25.4	32.6	51.5	26.4	35.9	59.9	35.8	36.9	26.4	37.9	50.4	51.2	31.2	43.7
0.042	11.3	5.2	5	11.1	7.7	9.2	8.3	11.1	6.5	13.5	21.7	10.8	2.7	8.4	13.5	12.2	11.6	13.9	5.3	10.6	25	13.6	6.7	8	25.3
0.545	6.1	4.3	4.7	6.4	4.8	10	8	3.6	9.5	7.3	5.3	9.1	6.6	11.3	2.9	5.7	7.5	8.7	6.3	4.6	8.5	3.1	7.4	4.3	8.9
7.2	3.8	6.2	2.6	6.2	6.4	8.9	10.3	4.8	6	8.2	3.3	6.6	4.3	3.5	3.5	5.6	7.4	9.7	5.9	4.3	5.6	7.4	10.3	4.4	4
	6-mo P23H mouse 1	6-mo P23H mouse 1	6-mo P23H mouse 2	6-mo P23H mouse 3	6-mo P23H mouse 3
0.0005	98.4	97.7	89.1	97.7	98.4
0.0036	69.2	65.8	62	71.1	88.3
0.042	32.5	50.2	20.4	39.8	48
0.545	13.7	14.5	41.4	18.7	35.3
7.2	14	10.4	6.5	10.4	7.9
