# Supplementary material for: Homeostatic plasticity in the retina is associated with maintenance of night vision during retinal degenerative disease
Source: eLife. 2020 Sep 22;9:e59422. doi: 10.7554/eLife.59422 (PMC7529457; doi:10.7554/eLife.59422)
Supplement: Supplementary file 1. [file elife-59422-supp1.xls]

## Sheet: Het_femvsHet_male_DEG_all
Gene_ID	P23h11_2	P23h12_1	P23h12_8	P23h14_3	P23h11_1	P23h12_2	P23h12_4	log2FoldChange	pvalue	padj	GeneName	Chrom	Strand	Start	End	GeneLength	GeneType	GeneDescription	P23h11_2_readcount	P23h12_1_readcount	P23h12_8_readcount	P23h14_3_readcount	P23h11_1_readcount	P23h12_2_readcount	P23h12_4_readcount	P23h11_2_fpkm	P23h12_1_fpkm	P23h12_8_fpkm	P23h14_3_fpkm	P23h11_1_fpkm	P23h12_2_fpkm	P23h12_4_fpkm
ENSMUSG00000086503	57061.1	53775.6	52550.6	60421.9	21.8351	12.6397	2.53629	5.7184	0	0	Xist	chrX	-	103460375	103483217	17769	lincRNA	inactive_X_specific_transcripts	63088	60334	52642	72551	20	12	2	144.841	136.768	132.133	156.165	0.0559898	0.0318768	0.00640278
ENSMUSG00000037369	2289.21	2234.48	2122.31	2224.46	1358.14	1269.24	1212.35	0.59289	1.6153e-34	6.283e-31	Kdm6a	chrX	+	18162575	18279936	5935	protein_coding	lysine_(K)-specific_demethylase_6A	2531	2507	2126	2671	1244	1205	956	17.3972	17.0145	15.9767	17.2129	10.4266	9.58347	9.16302
ENSMUSG00000035150	3266.04	3019.72	3014.76	2864.9	1970.62	1784.31	1815.99	0.53137	6.3863e-28	1.7743e-24	Eif2s3x	chrX	-	94188707	94212862	3647	protein_coding	eukaryotic_translation_initiation_factor_2_subunit_3_structural_gene_X-linked	3611	3388	3020	3440	1805	1694	1432	40.3925	37.419	36.933	36.0765	24.6197	21.9247	22.3362
ENSMUSG00000025332	6092.5	6882.6	7002.82	6647.56	4331	4869.46	4791.06	0.38902	4.2469e-16	1.0324e-12	Kdm5c	chrX	+	152233020	152274535	6449	protein_coding	lysine_(K)-specific_demethylase_5C	6736	7722	7015	7982	3967	4623	3778	42.6107	48.2305	48.5153	47.3393	30.5993	33.8367	33.3251
ENSMUSG00000087174	941.552	878.82	887.457	721.222	549.153	602.494	478.091	0.34826	4.3431e-10	8.4465e-07	5530601H04Rik	chrX	-	105037197	105079609	3732	processed_transcript	RIKEN_cDNA_5530601H04_gene	1041	986	889	866	503	572	377	11.3794	10.6419	10.6244	8.8752	6.70453	7.23454	5.74647
ENSMUSG00000000787	11577.2	10512	11017.8	10923.3	8651.08	8072.58	7994.39	0.34161	2.4295e-15	5.2499e-12	Ddx3x	chrX	+	13280970	13294052	4692	protein_coding	DEAD/H_(Asp-Glu-Ala-Asp/His)_box_polypeptide_3_X-linked	12800	11794	11037	13116	7924	7664	6304	111.291	101.248	104.915	106.917	84.0095	77.1	76.4292
ENSMUSG00000097571	386.208	347.606	337.413	365.608	255.471	250.688	192.758	0.27654	6.8812e-07	0.0012166	Jpx	chrX	+	103493558	103506425	3802	lincRNA	Jpx_transcript_Xist_activator_(non-protein_coding)	427	390	338	439	234	238	152	4.58168	4.13178	3.96504	4.41626	3.06158	2.95475	2.27422
ENSMUSG00000031226	503.789	510.714	544.054	468.044	370.105	363.393	369.031	0.25965	2.8561e-06	0.0046287	Pbdc1	chrX	+	105079756	105117090	3276	protein_coding	polysaccharide_biosynthesis_domain_containing_1	557	573	545	562	339	345	291	6.93618	7.04523	7.41986	6.56137	5.14751	4.97086	5.05301
ENSMUSG00000099876	0	0	0	0	89.524	125.344	67.2118	-0.37277	1.3532e-28	4.3861e-25	RP24-540G19.3	chrY	+	1048393	1049134	742	lincRNA	predicted_gene_29650	0	0	0	0	82	119	53	0	0	0	0	5.49733	7.57007	4.06325
ENSMUSG00000068457	0	0.891298	0	0	806.808	991.167	806.541	-1.9997	6.9868e-287	3.397e-283	Uty	chrY	-	1096861	1245759	5208	protein_coding	ubiquitously_transcribed_tetratricopeptide_repeat_gene_Y_chromosome	0	1	0	0	739	941	636	0	0.00773417	0	0	7.05855	8.52855	6.94684
ENSMUSG00000056673	0	0	0	0	1144.16	1141.79	890.239	-2.1153	0	0	Kdm5d	chrY	+	897788	956786	7974	protein_coding	lysine_(K)-specific_demethylase_5D	0	0	0	0	1048	1084	702	0	0	0	0	6.53773	6.41667	5.00798
ENSMUSG00000069045	0	0.891298	0	0	1909.48	2017.09	1947.87	-3.1693	0	0	Ddx3y	chrY	-	1260771	1286629	4600	protein_coding	DEAD_(Asp-Glu-Ala-Asp)_box_polypeptide_3_Y-linked	0	1	0	0	1749	1915	1536	0	0.00875642	0	0	18.9136	19.6502	18.9948
	Females				Males
