# Supplementary material for: Homeostatic plasticity in the retina is associated with maintenance of night vision during retinal degenerative disease
Source: eLife. 2020 Sep 22;9:e59422. doi: 10.7554/eLife.59422 (PMC7529457; doi:10.7554/eLife.59422)
Supplement: Supplementary file 2. [file elife-59422-supp2.xls]

## Sheet: WT_malevsWT_fem_DEG_all
Gene_ID	P23h11_4	P23h12_3	P23h13_1	P23h11_3	P23h12_5	P23h12_6	P23h12_7	log2FoldChange	pvalue	padj	GeneName	Chrom	Strand	Start	End	GeneLength	GeneType	GeneDescription	P23h11_4_readcount	P23h12_3_readcount	P23h13_1_readcount	P23h11_3_readcount	P23h12_5_readcount	P23h12_6_readcount	P23h12_7_readcount	P23h11_4_fpkm	P23h12_3_fpkm	P23h13_1_fpkm	P23h11_3_fpkm	P23h12_5_fpkm	P23h12_6_fpkm	P23h12_7_fpkm
ENSMUSG00000069049	1827.81	1915.67	2020.42	0	0	0	0	3.2444	0	0	Eif2s3y	chrY	+	1010543	1028847	3114	protein_coding	eukaryotic_translation_initiation_factor_2_subunit_3_structural_gene_Y-linked	1739	2047	2112	0	0	0	0	26.8204	28.5	30.1677	0	0	0	0
ENSMUSG00000069045	1807.84	1886.66	1770.74	0	0	0	0	3.2331	0	0	Ddx3y	chrY	-	1260771	1286629	4600	protein_coding	DEAD_(Asp-Glu-Ala-Asp)_box_polypeptide_3_Y-linked	1720	2016	1851	0	0	0	0	17.9579	19.0011	17.8984	0	0	0	0
ENSMUSG00000056673	951.216	913.383	1015	0	0	0	1.15501	2.4112	0	0	Kdm5d	chrY	+	897788	956786	7974	protein_coding	lysine_(K)-specific_demethylase_5D	905	976	1061	0	0	0	1	5.45076	5.30664	5.91842	0	0	0	0.00658078
ENSMUSG00000068457	937.552	856.297	832.277	0	0	0	1.15501	2.2837	4.5122e-306	1.4334e-302	Uty	chrY	-	1096861	1245759	5208	protein_coding	ubiquitously_transcribed_tetratricopeptide_repeat_gene_Y_chromosome	892	915	870	0	0	0	1	8.2258	7.61721	7.43045	0	0	0	0.0100759
ENSMUSG00000057440	854.518	802.018	890.632	688.774	546.082	550.507	571.728	0.31961	8.6931e-08	9.2053e-05	Mpp7	chr18	-	7347962	7626863	4975	protein_coding	membrane_protein_palmitoylated_7_(MAGUK_p55_subfamily_member_7)	813	857	931	784	487	599	495	7.84841	7.4685	8.32383	6.46726	5.07315	5.15721	5.22114
ENSMUSG00000071984	765.177	606.426	819.841	586.864	490.017	536.722	508.203	0.25041	3.9405e-05	0.029377	Fndc1	chr17	-	7738569	7827302	5845	protein_coding	fibronectin_type_III_domain_containing_1	728	648	857	668	437	584	440	5.98179	4.80658	6.52173	4.69017	3.87471	4.27966	3.95022
ENSMUSG00000025860	15779.7	14700.2	15308.2	13147.3	13559	13507.2	13644.1	0.16004	4.1613e-05	0.029377	Xiap	chrX	+	42059679	42109656	6834	protein_coding	X-linked_inhibitor_of_apoptosis	15013	15708	16002	14965	12092	14697	11813	105.506	99.6533	104.152	89.8667	91.6991	92.1159	90.7066
ENSMUSG00000030207	1909.79	1906.31	1822.4	2133.09	2266.19	2211.22	2283.45	-0.19776	2.7757e-05	0.022044	8430419L09Rik	chr6	+	135197977	135244955	4221	protein_coding	RIKEN_cDNA_8430419L09_gene	1817	2037	1905	2428	2021	2406	1977	20.674	20.9229	20.0746	23.6064	24.8138	24.4153	24.5779
ENSMUSG00000068874	412.018	363.107	311.865	503.403	460.862	525.693	540.543	-0.26028	1.9678e-05	0.01667	Selenbp1	chr3	+	94933056	94944758	1712	protein_coding	selenium_binding_protein_1	392	388	326	573	411	572	468	10.9968	9.82593	8.46995	13.7356	12.4417	14.3111	14.3448
ENSMUSG00000000787	8675.51	8065.1	7631.12	9999.52	10633.5	10476.2	10136.3	-0.28728	2.3919e-10	3.0394e-07	Ddx3x	chrX	+	13280970	13294052	4692	protein_coding	DEAD/H_(Asp-Glu-Ala-Asp/His)_box_polypeptide_3_X-linked	8254	8618	7977	11382	9483	11399	8776	84.4872	79.6332	75.622	99.5537	104.744	104.061	98.1504
ENSMUSG00000031226	307.963	310.7	316.648	425.213	427.223	443.898	479.328	-0.29503	9.8556e-07	0.00089454	Pbdc1	chrX	+	105079756	105117090	3276	protein_coding	polysaccharide_biosynthesis_domain_containing_1	293	332	331	484	381	483	415	4.29545	4.3938	4.49418	6.06315	6.0273	6.31516	6.64749
ENSMUSG00000096768	421.478	351.877	255.423	499.888	529.263	623.112	689.539	-0.29959	5.4681e-07	0.00053449	Erdr1	chrY	+	90784738	90816464	887	protein_coding	erythroid_differentiation_regulator_1	401	376	267	569	472	678	597	21.7123	18.3785	13.3892	26.326	27.5778	32.7406	35.3187
ENSMUSG00000087174	591.751	477.28	568.244	802.984	714.28	793.135	820.054	-0.32065	6.8143e-08	7.8717e-05	5530601H04Rik	chrX	-	105037197	105079609	3732	processed_transcript	RIKEN_cDNA_5530601H04_gene	563	510	594	914	637	863	710	7.24521	5.92481	7.07965	10.0508	8.84585	9.9049	9.98321
ENSMUSG00000064330	1533.51	1733.18	1951.55	2531.07	2297.58	2645.93	2493.66	-0.35932	1.7626e-10	2.4885e-07	Pde6h	chr6	+	136954523	136968865	5940	protein_coding	phosphodiesterase_6H_cGMP-specific_cone_gamma	1459	1852	2040	2881	2049	2879	2159	11.7965	13.5176	15.276	19.9046	17.8771	20.7604	19.073
ENSMUSG00000035150	1904.53	1801.5	1765.96	2790.24	2786.48	2785.62	2744.29	-0.50398	3.4562e-28	5.4898e-25	Eif2s3x	chrX	-	94188707	94212862	3647	protein_coding	eukaryotic_translation_initiation_factor_2_subunit_3_structural_gene_X-linked	1812	1925	1846	3176	2485	3031	2376	23.862	22.8845	22.5145	35.7389	35.3128	35.5985	34.1873
ENSMUSG00000025332	4971.55	4829.89	4831.99	6953.63	7402.95	7475.5	7513.31	-0.50756	1.673e-33	3.0369e-30	Kdm5c	chrX	+	152233020	152274535	6449	protein_coding	lysine_(K)-specific_demethylase_5C	4730	5161	5051	7915	6602	8134	6505	35.2252	34.6966	34.8379	50.3681	53.0548	54.0248	52.9308
ENSMUSG00000037369	1295.97	1264.32	1194.84	2162.96	2244.88	2114.72	2156.4	-0.6336	2.1707e-38	4.5971e-35	Kdm6a	chrX	+	18162575	18279936	5935	protein_coding	lysine_(K)-specific_demethylase_6A	1233	1351	1249	2462	2002	2301	1867	9.97762	9.86916	9.3607	17.0241	17.4818	16.6065	16.5073
ENSMUSG00000086503	9.4596	14.9735	30.6125	45960.7	50851.8	56500.1	53342.8	-1.0722	7.8455e-82	1.9938e-78	Xist	chrX	-	103460375	103483217	17769	lincRNA	inactive_X_specific_transcripts	9	16	32	52315	45350	61477	46184	0.0243256	0.0390394	0.0801039	120.826	132.268	148.194	136.39
	Males			Females
