# Supplementary material for: Homeostatic plasticity in the retina is associated with maintenance of night vision during retinal degenerative disease
Source: eLife. 2020 Sep 22;9:e59422. doi: 10.7554/eLife.59422 (PMC7529457; doi:10.7554/eLife.59422)
Supplement: Supplementary file 3. [file elife-59422-supp3.xls]

## Sheet: Downregulated genes by log-fold
Gene_ID	P23h11_1	P23h11_2	P23h12_1	P23h12_2	P23h12_4	P23h12_8	P23h14_3	P23h11_3	P23h11_4	P23h12_3	P23h12_5	P23h12_6	P23h12_7	P23h13_1	log2FoldChange	pvalue	padj	GeneName	Chrom	Strand	Start	End	GeneLength	GeneType	GeneDescription	P23h11_1_readcount	P23h11_2_readcount	P23h12_1_readcount	P23h12_2_readcount	P23h12_4_readcount	P23h12_8_readcount	P23h14_3_readcount	P23h11_3_readcount	P23h11_4_readcount	P23h12_3_readcount	P23h12_5_readcount	P23h12_6_readcount	P23h12_7_readcount	P23h13_1_readcount	P23h11_1_fpkm	P23h11_2_fpkm	P23h12_1_fpkm	P23h12_2_fpkm	P23h12_4_fpkm	P23h12_8_fpkm	P23h14_3_fpkm	P23h11_3_fpkm	P23h11_4_fpkm	P23h12_3_fpkm
ENSMUSG00000031966	21.955	17.2756	26.3922	28.2058	16.9223	22.9014	15.1294	225.971	328.482	245.589	210.504	223.183	201.428	211.716	-2.9159	7.2005e-112	3.9573e-109	Glb1l3	chr9	-	26817953	26860823	2468	protein_coding	galactosidase_beta_1_like_3	21	20	31	28	14	24	19	246	298	251	180	233	168	212	0.423268	0.330593	0.505942	0.535512	0.322689	0.43372	0.294449	4.0906	5.79903	4.40935
ENSMUSG00000089890	78.4107	89.8332	80.0279	81.5955	85.8202	87.7887	88.3875	504.301	480.598	391.377	433.872	428.166	390.867	552.26	-2.2655	4.4407e-140	3.3192e-137	Gm16055	chr6	-	8354056	8364136	626	antisense	predicted_gene_16055	75	104	94	81	71	92	111	549	436	400	371	447	326	553	5.95976	6.77747	6.04837	6.10755	6.45187	6.55476	6.78189	35.9911	33.45	27.7033
ENSMUSG00000086421	29.2733	32.8237	21.284	23.1691	35.0533	28.6268	32.6476	154.322	162.036	165.357	149.692	149.427	160.663	190.744	-2.1936	1.2343e-80	4.1935e-78	Gm14091	chr2	-	118829874	118834122	874	antisense	predicted_gene_14091	28	38	25	23	29	30	41	168	147	169	128	156	134	191	1.59363	1.7737	1.15216	1.24215	1.8875	1.53092	1.79421	7.88851	8.07775	8.38342
ENSMUSG00000027331	62.7286	62.1922	44.2708	60.4411	45.932	50.5739	63.7027	317.829	298.72	224.063	206.996	319.927	270.969	305.59	-2.0665	4.7899e-76	1.4436e-73	Knstrn	chr2	+	118814003	118853957	4602	protein_coding	kinetochore-localized_astrin/SPAG5_binding	60	72	52	60	38	53	80	346	271	229	177	334	226	306	0.648554	0.638256	0.455136	0.615405	0.469719	0.513656	0.664883	3.08551	2.82818	2.15742
ENSMUSG00000027360	72.1378	93.2883	79.1766	93.6837	67.6892	74.4296	59.7213	368.351	378.085	327.778	346.162	330.464	302.142	363.513	-2.0202	8.7797e-113	5.1268e-110	Hdc	chr2	-	126593667	126619299	4518	protein_coding	histidine_decarboxylase	69	108	93	93	56	78	75	401	343	335	296	345	252	364	0.759704	0.975184	0.829127	0.971613	0.705088	0.770002	0.634917	3.64246	3.64613	3.21473
ENSMUSG00000086306	57.5012	53.5544	80.0279	60.4411	68.8979	76.338	61.3139	315.992	222.662	223.085	273.655	309.391	292.551	258.653	-1.8597	3.4134e-70	9.664e-68	Gm11754	chr11	-	119106328	119111425	661	lincRNA	predicted_gene_11754	55	62	94	60	57	80	77	344	202	228	234	323	244	259	4.13907	3.82648	5.7281	4.28456	4.9054	5.39799	4.45545	21.3577	14.6769	14.9547
ENSMUSG00000048281	34.5007	24.1859	28.9463	27.1985	36.2621	21.9472	27.0737	132.276	88.1831	86.1029	80.6932	95.7865	100.714	127.829	-1.5314	1.5056e-29	1.0862e-27	Dleu7	chr14	-	62276231	62292979	1330	protein_coding	deleted_in_lymphocytic_leukemia_7	33	28	34	27	30	23	34	144	80	88	69	100	84	128	1.23425	0.858846	1.0297	0.958228	1.28313	0.771293	0.977753	4.44332	2.88884	2.86864
ENSMUSG00000082332	0	0	0	0	0	2.86268	3.18514	19.2902	14.3297	17.612	19.8809	12.4523	14.3877	18.9746	-1.4725	4.3113e-16	1.3968e-14	Gm13384	chr2	-	6132208	6133956	1344	pseudogene	predicted_gene_13384	0	0	0	0	0	3	4	21	13	18	17	13	12	19	0	0	0	0	0	0.0995555	0.113832	0.641235	0.464546	0.580656
ENSMUSG00000043020	36.5917	39.7339	17.8786	33.2426	21.7572	26.7183	43.7956	117.578	120.149	84.1461	85.3711	105.365	109.107	103.861	-1.4128	9.4111e-25	5.3615e-23	Wdr63	chr3	-	146040526	146108130	3176	protein_coding	WD_repeat_domain_63	35	46	21	33	18	28	55	128	109	86	73	110	91	104	0.548188	0.590862	0.266332	0.490445	0.322399	0.393207	0.662345	1.65397	1.64828	1.17399
ENSMUSG00000018486	55.4102	45.7804	57.0412	67.4925	42.3057	64.8873	50.9622	157.077	170.855	151.659	146.183	163.795	157.066	173.767	-1.4109	1.0424e-43	1.3716e-41	Wnt9b	chr11	-	103727364	103749821	4518	protein_coding	wingless-type_MMTV_integration_site_family_member_9B	53	53	67	67	35	68	64	171	155	155	125	171	131	174	0.583541	0.478562	0.597328	0.699979	0.44068	0.671284	0.541796	1.55327	1.64767	1.48741
ENSMUSG00000084913	97.2293	71.6938	49.3789	85.6249	58.0193	89.6972	93.9615	219.541	260.14	183.947	201.148	239.466	206.224	288.613	-1.355	2.2537e-29	1.6012e-27	Gm7616	chr9	+	59951285	59959044	624	antisense	predicted_gene_7616	93	83	58	85	48	94	118	239	236	188	172	250	172	289	7.41379	5.42628	3.74393	6.4297	4.37581	6.71872	7.23268	15.7185	18.164	13.0623
ENSMUSG00000097254	47.0464	61.3284	45.1221	43.3161	47.1407	59.162	50.9622	157.077	111.331	150.68	120.455	147.511	139.081	140.811	-1.2996	3.9637e-32	3.3065e-30	C430042M11Rik	chr17	-	83851675	83854393	1617	lincRNA	RIKEN_cDNA_C430042M11_gene	45	71	53	43	39	62	64	171	101	154	103	154	116	141	1.38434	1.79125	1.32023	1.25521	1.37201	1.71011	1.51381	4.33993	2.99982	4.12911
ENSMUSG00000084847	60.6376	52.6906	57.0412	75.5513	43.5145	72.5211	80.4247	201.169	205.026	108.607	171.912	167.626	159.464	225.697	-1.2538	8.63e-22	4.0315e-20	Gm15507	chr9	-	59957511	59961801	805	processed_transcript	predicted_gene_15507	58	61	67	75	36	76	101	219	186	111	147	175	133	226	3.58405	3.09131	3.35246	4.39766	2.54395	4.21077	4.79874	11.1647	11.0969	5.97823
ENSMUSG00000090003	16.7276	23.3221	24.6895	28.2058	25.3834	20.993	19.1108	58.7892	77.1602	65.5556	53.7955	52.6826	58.7499	65.9116	-1.1877	1.8737e-17	6.7985e-16	Gm15882	chr8	+	58523294	58524326	855	antisense	predicted_gene_15882	16	27	29	28	21	22	24	64	70	67	46	55	49	66	0.930884	1.28827	1.36621	1.54578	1.39719	1.14762	1.07361	3.07193	3.93203	3.39746
ENSMUSG00000036083	106.639	127.84	155.799	145.059	103.951	144.088	141.739	273.737	326.277	302.339	370.721	390.809	263.775	340.543	-1.1849	2.4527e-33	2.1721e-31	Slc17a3	chr13	+	23839434	23860714	4276	protein_coding	solute_carrier_family_17_(sodium_phosphate)_member_3	102	148	183	144	86	151	178	298	296	309	317	408	220	341	1.1866	1.41199	1.72384	1.58958	1.1441	1.57501	1.59215	2.86006	3.32459	3.13304
ENSMUSG00000079103	27.1824	24.1859	12.7704	25.1838	21.7572	36.2606	31.0551	71.6493	106.922	54.7928	67.8291	73.7556	65.9438	69.9063	-1.18	4.0883e-15	1.2462e-13	Tgm7	chr2	-	121093565	121109795	2151	protein_coding	transglutaminase_7	26	28	15	25	18	38	39	78	97	56	58	77	55	70	0.601277	0.531039	0.280889	0.548601	0.476029	0.787928	0.693468	1.48817	2.16579	1.12874
ENSMUSG00000079173	1078.93	989.892	1144.23	1329.7	1067.31	1199.46	1527.27	2978.04	3664.01	2352.18	2609.08	3234.71	2599.38	2947.05	-1.1669	7.7839e-28	5.1578e-26	Zan	chr5	-	137378637	137477064	16481	protein_coding	zonadhesin	1032	1146	1344	1320	883	1257	1918	3242	3324	2404	2231	3377	2168	2951	3.11486	2.83668	3.28473	3.78048	3.04774	3.40169	4.4511	8.07284	9.68639	6.32407
ENSMUSG00000086417	37.6371	27.641	13.6218	20.147	18.131	12.4049	25.4811	59.7078	57.319	43.0515	64.3207	69.9242	70.7397	62.9156	-1.1062	1.1147e-12	2.6947e-11	Gm12996	chr4	+	116824903	116830603	636	antisense	predicted_gene_12996	36	32	16	20	15	13	32	65	52	44	55	73	59	63	2.8157	2.05259	1.01332	1.48433	1.34164	0.911653	1.9244	4.19424	3.92673	2.99945
ENSMUSG00000005583	1389.44	1537.53	1375.8	1375.03	1380.38	1563.02	1660.25	3103.89	3582.44	3095.79	3234.75	3390.84	3068.18	2959.03	-1.1008	7.1944e-99	3.447e-96	Mef2c	chr13	+	83504034	83667079	6427	protein_coding	myocyte_enhancer_factor_2C	1329	1780	1616	1365	1142	1638	2085	3379	3250	3164	2766	3540	2559	2963	10.2863	11.2985	10.1279	10.0249	10.1079	11.3671	12.4079	21.5763	24.2862	21.3439
ENSMUSG00000056288	146.367	160.663	163.461	184.345	165.597	155.539	221.367	469.395	421.074	308.209	357.857	399.43	363.29	398.466	-1.0976	2.4373e-32	2.0515e-30	Gm11961	chr11	-	4620275	4630011	1319	antisense	predicted_gene_11961	140	186	192	183	137	163	278	511	382	315	306	417	303	399	5.27989	5.75277	5.86328	6.54882	5.9085	5.51171	8.06124	15.8991	13.9092	10.3541
ENSMUSG00000018569	23.0005	19.867	25.5408	32.2352	19.3398	31.4894	17.5182	60.6263	52.9098	47.9437	53.7955	69.9242	77.9336	73.9009	-1.0928	6.9381e-14	1.9038e-12	Cldn7	chr11	+	69964779	69967885	1335	protein_coding	claudin_7	22	23	30	32	16	33	22	66	48	49	46	73	65	74	0.819753	0.702838	0.905158	1.13142	0.681773	1.10249	0.630294	2.0289	1.72681	1.59133
ENSMUSG00000086262	29.2733	26.7772	26.3922	30.2205	24.1747	43.8944	16.722	71.6493	58.4213	64.5772	66.6596	70.882	75.5356	76.8969	-1.0682	1.6817e-14	4.8345e-13	A930031H19Rik	chr4	-	131000832	131010474	949	lincRNA	RIKEN_cDNA_A930031H19_gene	28	31	31	30	20	46	21	78	53	66	57	74	63	77	1.46769	1.33261	1.31577	1.49215	1.19885	2.1619	0.84636	3.37307	2.68222	3.01525
ENSMUSG00000049832	27.1824	29.3685	33.2031	20.147	20.5485	34.3521	39.0179	68.8936	78.2625	63.5988	72.507	92.9129	68.3417	58.921	-1.0579	2.1205e-14	6.0311e-13	Gm9840	chr17	-	35935624	35935950	327	pseudogene	predicted_gene_9840	26	34	39	20	17	36	49	75	71	65	62	97	57	59	3.95519	4.2417	4.80398	2.88695	2.95735	4.91019	5.73126	9.41262	10.4279	8.6181
ENSMUSG00000087173	15.6821	20.7307	20.4327	25.1838	19.3398	14.3134	29.4625	70.7307	59.5236	40.1161	56.1344	53.6405	33.5714	78.8942	-1.0548	3.7048e-11	7.566e-10	Gm11337	chr13	-	23794768	23804599	335	antisense	predicted_gene_11337	15	24	24	25	16	15	37	77	54	41	48	56	28	79	2.22735	2.92264	2.8857	3.52251	2.71692	1.99705	4.22434	9.43285	7.74165	5.30621
ENSMUSG00000099950	0	1.72756	1.70272	0	6.04368	0	0.796284	9.18581	9.9206	9.78443	10.5252	13.4101	14.3877	14.9799	-1.0439	4.5e-09	7.0307e-08	RP24-421N21.1	chr1	+	55931241	55972328	1906	lincRNA	RIKEN_cDNA_9130227L01_gene	0	2	2	0	5	0	1	10	9	10	9	14	12	15	0	0.0428071	0.042266	0	0.149227	0	0.0200668	0.215315	0.22678	0.227469
ENSMUSG00000036928	195.504	177.075	162.61	157.147	151.092	162.218	195.886	380.293	375.88	352.239	384.755	412.84	357.295	303.593	-1.0386	1.9992e-40	2.306e-38	Stag3	chr5	+	138280240	138312393	4669	protein_coding	stromal_antigen_3	187	205	191	156	125	170	246	414	341	360	329	431	298	304	1.99232	1.79118	1.64776	1.57709	1.52296	1.62393	2.01518	3.63893	3.50764	3.34291
ENSMUSG00000016756	51.2283	39.7339	21.284	42.3088	21.7572	37.2148	40.6105	90.9395	124.559	72.4047	81.8627	80.4607	73.1376	101.863	-1.0366	9.1912e-13	2.2421e-11	Cmah	chr13	+	24327420	24477285	9727	protein_coding	cytidine_monophospho-N-acetylneuraminic_acid_hydroxylase	49	46	25	42	18	39	51	99	113	74	70	84	61	102	0.250587	0.192925	0.103525	0.203811	0.105268	0.178825	0.200536	0.417689	0.557935	0.329836
ENSMUSG00000001027	361.735	341.193	258.814	295.154	278.009	271	451.493	787.224	932.536	681.974	583.564	777.787	604.285	759.981	-1.0267	7.0806e-17	2.4277e-15	Scn4a	chr11	-	106318592	106353288	6598	protein_coding	sodium_channel_voltage-gated_type_IV_alpha	346	395	304	293	230	284	567	857	846	697	499	812	504	761	2.60859	2.44227	1.85586	2.0961	1.98297	1.91977	3.2868	5.33047	6.15804	4.58001
ENSMUSG00000005696	120.23	120.065	154.096	120.882	94.2814	159.356	159.257	319.666	265.652	241.675	275.994	288.317	294.949	330.557	-1.0231	2.3452e-25	1.3652e-23	Sh2d1a	chrX	+	42502453	42529330	2746	protein_coding	SH2_domain_containing_1A	115	139	181	120	78	167	200	348	241	247	236	301	246	331	2.08324	2.06501	2.65499	2.06271	1.61583	2.71243	2.78568	5.20087	4.21503	3.8998
ENSMUSG00000068874	176.685	247.905	191.556	218.595	223.616	221.38	223.756	526.347	432.097	379.636	480.651	547.899	561.122	325.564	-1.0177	1.1283e-23	5.8893e-22	Selenbp1	chr3	+	94933056	94944758	1712	protein_coding	selenium_binding_protein_1	169	287	225	217	185	232	281	573	392	388	411	572	468	326	4.91049	6.83891	5.29375	5.98291	6.14709	6.04404	6.27776	13.7356	10.9968	9.82593
ENSMUSG00000030276	573.966	465.578	521.033	592.323	495.582	574.444	571.732	1151.9	1286.37	1080.2	1018.61	1197.33	987.958	1068.57	-1.0045	1.8495e-54	3.3927e-52	Ttll3	chr6	+	113389260	113414583	3143	protein_coding	tubulin_tyrosine_ligase-like_family_member_3	549	539	612	588	410	602	718	1254	1167	1104	871	1250	824	1070	8.689	6.99606	7.84317	8.83059	7.42063	8.54271	8.7374	16.3738	17.8324	15.229
ENSMUSG00000097832	8.36381	14.6843	11.9191	9.06616	16.9223	8.58803	10.3517	35.8247	27.5572	29.3533	32.7451	28.736	27.5765	29.9598	-0.99955	1.3097e-09	2.2148e-08	Gm26912	chr12	-	110842276	110845216	1483	lincRNA	predicted_gene_26912	8	17	14	9	14	9	13	39	25	30	28	30	23	30	0.268343	0.467645	0.380252	0.286456	0.537017	0.270673	0.335277	1.07925	0.809624	0.877053
ENSMUSG00000099338	173.549	171.029	186.448	203.485	204.276	204.204	224.552	404.176	416.665	394.312	353.179	388.893	422.04	419.438	-0.9938	1.1912e-46	1.7808e-44	RP23-185G9.3	chr8	+	13200720	13207714	1039	lincRNA	RIKEN_cDNA_2810030D12_gene	166	198	219	202	169	214	282	440	378	403	302	406	352	420	7.94757	7.77425	8.49011	9.17683	9.25279	9.18632	10.3809	17.3794	17.4727	16.8165
ENSMUSG00000043155	38.6826	34.5512	30.649	27.1985	45.932	35.3063	39.0179	85.428	100.308	87.0814	63.1512	80.4607	64.7448	77.8956	-0.99118	1.72e-14	4.9371e-13	Hpdl	chr4	-	116819904	116821707	1804	protein_coding	4-hydroxyphenylpyruvate_dioxygenase-like	37	40	36	27	38	37	49	93	91	89	54	84	54	78	1.02025	0.904549	0.803805	0.706454	1.19825	0.914763	1.03887	2.11565	2.42264	2.13894
ENSMUSG00000005124	851.017	744.579	910.105	1048.65	919.848	1055.37	910.153	1647.93	1632.49	1887.42	1753.03	2024.93	1909.97	2178.08	-0.97524	6.8484e-41	7.9981e-39	Wisp1	chr15	+	66891320	66923201	5097	protein_coding	WNT1_inducible_signaling_pathway_protein_1	814	862	1069	1041	761	1106	1143	1794	1481	1929	1499	2114	1593	2181	7.94422	6.89924	8.44788	9.64035	8.4932	9.67796	8.57697	14.4446	13.9548	16.4083
ENSMUSG00000032514	108.729	114.883	117.488	127.934	111.204	147.905	127.405	246.18	302.027	231.891	218.69	245.214	235	266.643	-0.9646	8.9118e-29	6.1905e-27	Ttc21a	chr9	+	119937606	119967793	4182	protein_coding	tetratricopeptide_repeat_domain_21A	104	133	138	127	92	155	160	268	274	237	187	256	196	267	1.23706	1.29741	1.32917	1.43343	1.25143	1.65307	1.46332	2.62995	3.14667	2.45703
ENSMUSG00000087298	43.91	63.056	50.2303	61.4484	35.0533	57.2535	54.1473	122.171	91.4899	102.736	105.252	113.986	116.301	127.829	-0.96201	6.7915e-17	2.3371e-15	Gm9392	chr7	-	46820864	46821417	554	pseudogene	predicted_pseudogene_9392	42	73	59	61	29	60	68	133	83	105	90	119	97	128	3.77121	5.37554	4.2897	5.19729	2.97776	4.83042	4.69463	9.85233	7.19536	8.21723
ENSMUSG00000030324	364912	383978	330469	361913	364673	367259	348122	714883	776228	722062	707857	674585	624201	732497	-0.96025	2.1072e-111	1.125e-108	Rho	chr6	+	115931927	115938829	3235	protein_coding	rhodopsin	349039	444532	388166	359272	301698	384877	437183	778247	704197	737971	605282	704259	520611	733479	5367.12	5605.8	4833.12	5242.1	5305.17	5306.29	5168.82	9872.8	10454.5	9890.33
ENSMUSG00000097727	714.06	689.297	466.546	659.815	551.183	461.845	781.155	1932.69	1859.56	1109.55	1075.91	1265.34	1029.92	1725.69	-0.95631	1.0123e-10	1.9561e-09	F630040K05Rik	chr17	+	45734506	45788594	2841	lincRNA	RIKEN_cDNA_F630040K05_gene	683	798	548	655	456	484	981	2104	1687	1134	920	1321	859	1728	11.9589	11.4588	7.76951	10.8825	9.13051	7.59832	13.2069	30.3929	28.5186	17.3056
ENSMUSG00000030470	1.04548	5.18268	5.95953	9.06616	4.83494	8.58803	7.96284	12.8601	22.0458	20.5473	16.3725	21.073	23.9796	21.9705	-0.95615	9.937e-08	1.285e-06	Csrp3	chr7	-	48830398	48848051	919	protein_coding	cysteine_and_glycine-rich_protein_3	1	6	7	9	4	9	10	14	20	21	14	22	20	22	0.0541285	0.266345	0.306808	0.462257	0.247597	0.436788	0.416185	0.625186	1.0452	0.990717
ENSMUSG00000028730	17.7731	13.8205	17.0272	19.1397	18.131	8.58803	8.75912	39.499	46.2961	41.0946	29.2367	35.441	29.9744	31.9572	-0.94953	5.0981e-09	7.8792e-08	Wdr65	chr4	-	118554551	118620777	4020	protein_coding	cilia_and_flagella_associated_protein_57	17	16	20	19	15	9	11	43	42	42	25	37	25	32	0.210361	0.162369	0.200396	0.223092	0.212259	0.0998527	0.104657	0.438975	0.501773	0.45297
ENSMUSG00000004415	44.9555	53.5544	36.6085	78.5734	47.1407	53.4366	74.8507	101.962	123.456	116.435	112.269	121.649	111.505	163.78	-0.94915	6.7142e-13	1.6617e-11	Col26a1	chr5	-	136741759	136883209	2781	protein_coding	collagen_type_XXVI_alpha_1	43	62	43	78	39	56	94	111	112	119	96	127	93	164	0.769147	0.909493	0.622805	1.32388	0.797747	0.898112	1.29279	1.63802	1.9342	1.8552
ENSMUSG00000052085	118.139	133.886	121.745	85.6249	116.039	126.912	99.5355	250.773	248.015	230.912	238.571	200.194	256.581	202.728	-0.94781	1.3186e-24	7.406e-23	Dock8	chr19	+	24999529	25202432	7810	protein_coding	dedicator_of_cytokinesis_8	113	155	143	85	96	133	125	273	225	236	204	209	214	203	0.719729	0.809635	0.737513	0.513718	0.699232	0.759528	0.612154	1.43453	1.38362	1.31011
ENSMUSG00000052151	561.421	571.823	631.71	647.727	657.552	647.919	584.472	1184.05	1079.14	1334.6	1132.04	1336.22	1179.79	1169.43	-0.94628	2.0312e-63	4.5729e-61	Ppap2c	chr10	-	79526430	79533787	1645	protein_coding	phosphatidic_acid_phosphatase_type_2C	537	662	742	643	544	679	734	1289	979	1364	968	1395	984	1171	16.2387	16.4173	18.1686	18.4502	18.812	18.4097	17.066	32.1576	28.5826	35.9496
ENSMUSG00000097211	14.6367	18.1394	30.649	19.1397	10.8786	25.7641	40.6105	68.8936	60.6259	51.8575	43.2703	60.3455	51.556	57.9223	-0.93883	4.749e-09	7.3889e-08	BC065403	chr9	-	72361735	72409945	1043	antisense	cDNA_sequence_BC065403	14	21	36	19	9	27	51	75	55	53	37	63	43	58	0.667706	0.821379	1.39028	0.859856	0.490862	1.15458	1.8702	2.95103	2.53258	2.20312
ENSMUSG00000079465	195.504	193.487	165.164	175.279	134.17	149.813	163.238	333.445	445.325	281.791	328.62	347.705	1907.57	388.479	-0.92801	1.1237e-19	4.6558e-18	Col4a3	chr1	+	82586921	82722059	8554	protein_coding	collagen_type_IV_alpha_3	187	224	194	174	111	157	205	363	404	288	281	363	1591	389	1.08746	1.06829	0.913518	0.960145	0.738168	0.818604	0.916614	1.74154	2.26828	1.45972
ENSMUSG00000087077	9.40928	0.86378	0	5.03676	4.83494	0	0.796284	13.7787	19.8412	16.6335	7.0168	33.5253	22.7806	28.9612	-0.9246	1.3598e-07	1.725e-06	Gm12480	chr4	+	54651903	54656077	774	lincRNA	predicted_gene_12480	9	1	0	5	4	0	1	15	18	17	6	35	19	29	0.57842	0.052707	0	0.30492	0.293982	0	0.0494153	0.79533	1.1169	0.952256
ENSMUSG00000096001	9.40928	7.77402	15.3245	13.0956	21.7572	15.2676	3.98142	42.2547	41.887	25.4395	25.7283	29.6938	32.3724	31.9572	-0.92434	9.959e-08	1.2861e-06	2610528A11Rik	chr14	-	37102140	37114022	754	protein_coding	RIKEN_cDNA_2610528A11_gene	9	9	18	13	18	16	5	46	38	26	22	31	27	32	0.593763	0.486945	0.961581	0.813821	1.35801	0.946438	0.25363	2.50371	2.42045	1.49502
ENSMUSG00000027323	64.8195	49.2355	50.2303	65.4778	50.7669	62.0246	57.3324	127.683	117.945	112.521	91.2184	122.607	127.092	110.851	-0.92232	1.4921e-17	5.4456e-16	Rad51	chr2	+	119112793	119147445	3368	protein_coding	RAD51_homolog	62	57	59	65	42	65	72	139	107	115	78	128	106	111	0.915717	0.690417	0.70561	0.910957	0.709379	0.860765	0.817641	1.69371	1.52579	1.48037
ENSMUSG00000084788	151.594	155.48	131.961	133.978	159.553	165.081	150.498	312.318	378.085	235.805	311.078	300.77	237.398	292.608	-0.91149	2.6139e-22	1.2588e-20	Gm11342	chr13	-	24336270	24337343	815	lincRNA	predicted_gene_11342	145	180	155	133	132	173	189	340	343	241	266	314	198	293	8.85018	9.00998	7.66053	7.70284	9.21335	9.46742	8.86965	17.1206	20.2125	12.8205
ENSMUSG00000021335	99.3202	113.155	123.447	118.867	85.8202	127.866	137.757	196.576	272.265	181.99	208.165	273.95	250.586	238.68	-0.90859	3.8349e-18	1.4654e-16	Slc17a1	chr13	+	23867750	23895730	2026	protein_coding	solute_carrier_family_17_(sodium_phosphate)_member_1	95	131	145	118	71	134	173	214	247	186	178	286	209	239	2.33252	2.63779	2.88279	2.74915	1.99352	2.94991	3.26594	4.33482	5.8552	3.98033
ENSMUSG00000085390	16.7276	18.1394	11.0677	13.0956	14.5048	14.3134	10.3517	35.8247	39.6824	27.3964	22.2199	35.441	32.3724	37.9491	-0.89919	3.0048e-08	4.1746e-07	Gm13115	chr4	+	153907386	153908666	620	lincRNA	predicted_gene_13115	16	21	13	13	12	15	13	39	36	28	19	37	27	38	1.28372	1.38177	0.844571	0.989711	1.10101	1.07905	0.801962	2.58149	2.78866	1.958
ENSMUSG00000101008	30.3188	30.2323	33.2031	20.147	4.83494	24.8099	14.3331	67.0564	46.2961	43.0515	49.1176	60.3455	61.1479	55.925	-0.89808	4.8989e-08	6.6431e-07	RP24-490A22.2	chr7	-	16618627	16619832	724	lincRNA	predicted_gene_29442	29	35	39	20	4	26	18	73	42	44	42	63	51	56	1.99251	1.97214	2.16975	1.30391	0.314284	1.60169	0.950903	4.13791	2.78609	2.63487
ENSMUSG00000051920	48.0919	35.415	42.5681	44.3235	55.6018	38.169	42.9993	101.962	91.4899	77.297	91.2184	70.882	80.3315	108.854	-0.89282	4.4926e-13	1.1329e-11	Rspo2	chr15	-	43020811	43170818	3324	protein_coding	R-spondin_2_homolog_(Xenopus_laevis)	46	41	50	44	46	40	54	111	83	79	78	74	67	109	0.688396	0.50319	0.60589	0.62481	0.787224	0.536713	0.621348	1.37044	1.19923	1.03041
ENSMUSG00000035539	60.6376	89.8332	59.5953	87.6396	78.5678	86.8345	78.0358	155.24	141.093	135.025	170.742	157.09	124.694	190.744	-0.89033	5.42e-16	1.7372e-14	E230008N13Rik	chr4	+	45890303	45950774	5081	protein_coding	RIKEN_cDNA_E230008N13_gene	58	104	70	87	65	91	98	169	128	138	146	164	104	191	0.567833	0.835013	0.554924	0.808215	0.727722	0.798795	0.737699	1.36501	1.20989	1.17754
ENSMUSG00000051844	48.0919	56.1457	26.3922	42.3088	53.1844	52.4824	56.5362	103.8	106.922	70.4479	115.777	87.1658	85.1274	143.807	-0.88856	2.9934e-10	5.538e-09	B230319C09Rik	chr6	+	83441755	83448322	1689	processed_transcript	RIKEN_cDNA_B230319C09_gene	46	65	31	42	44	55	71	113	97	72	99	91	71	144	1.35478	1.56997	0.739293	1.17375	1.48192	1.45237	1.6078	2.74565	2.75821	1.8482
ENSMUSG00000045319	261.369	252.224	251.152	234.713	257.461	241.419	259.589	451.023	516.973	493.135	468.956	453.07	436.428	479.357	-0.88408	9.0043e-52	1.5158e-49	Proser2	chr2	-	6100025	6130211	2061	protein_coding	proline_and_serine_rich_2	250	292	295	233	213	253	326	491	469	504	401	473	364	480	6.03398	5.77981	5.76539	5.33623	5.87899	5.47502	6.04981	9.77689	10.929	10.6023
ENSMUSG00000025340	5104.01	4804.35	4891.92	5376.23	4984.83	5274	5454.54	10383.6	9861.07	8695.42	8590.91	9715.63	9443.15	9585.15	-0.87195	3.2541e-88	1.3219e-85	Rabgef1	chr5	+	130171798	130214342	2828	protein_coding	RAB_guanine_nucleotide_exchange_factor_(GEF)_1	4882	5562	5746	5337	4124	5527	6850	11304	8946	8887	7346	10143	7876	9598	85.8737	80.2344	81.841	89.0788	82.9546	87.1673	92.6431	164.04	151.927	136.245
ENSMUSG00000040632	21069.5	20944.9	24222.1	24235.9	25144.1	25822.3	21972.7	42423.7	41704	45003.5	42133.6	43761	43958.1	41191.8	-0.863	6.7698e-78	2.0738e-75	Nrl	chr14	-	55518978	55524981	2422	protein_coding	neural_retina_leucine_zipper_gene	20153	24248	28451	24059	20802	27061	27594	46184	37834	45995	36028	45686	36663	41247	413.911	408.423	473.16	468.878	488.576	498.325	435.755	782.554	750.227	823.346
ENSMUSG00000085376	266.596	251.36	178.786	198.448	216.364	229.014	256.403	502.464	475.086	316.037	384.755	451.155	398.061	523.298	-0.85754	9.0937e-18	3.3715e-16	Gm14508	chr5	+	116009316	116016105	901	antisense	predicted_gene_14508	255	291	210	197	179	240	322	547	431	323	329	471	332	524	14.0785	13.1758	9.38813	10.3204	11.3013	11.8804	13.6689	24.9149	22.974	15.5426
ENSMUSG00000085819	227.914	257.407	263.071	240.757	274.383	291.039	242.867	443.675	468.473	473.566	403.466	479.891	514.361	538.278	-0.85331	1.2992e-34	1.2199e-32	Ube4bos1	chr4	+	149347885	149365277	2227	antisense	ubiquitination_factor_E4B_opposite_strand_1	218	298	309	239	227	305	305	483	425	484	345	501	429	539	4.86943	5.4589	5.58885	5.06564	5.79838	6.10834	5.2382	8.9007	9.16544	9.4226
ENSMUSG00000067872	56.4557	40.5977	71.5143	58.4264	67.6892	78.2465	62.9064	122.171	101.411	127.198	125.133	111.112	122.296	133.821	-0.85152	4.6061e-14	1.2827e-12	Ccdc87	chr19	+	4839366	4842528	3163	protein_coding	coiled-coil_domain_containing_87	54	47	84	58	56	82	79	133	92	130	107	116	102	134	0.849252	0.606188	1.06971	0.865537	1.00714	1.15627	0.955278	1.72564	1.39693	1.78193
ENSMUSG00000074365	675.377	613.284	697.265	855.241	630.96	606.887	766.025	1407.27	1371.25	1077.27	1110.99	1258.64	1300.89	1455.05	-0.8478	7.2137e-28	4.8141e-26	Crxos	chr7	+	15882617	15904020	2246	protein_coding	cone-rod_homeobox_opposite_strand	646	710	819	849	522	636	962	1532	1244	1101	950	1314	1085	1457	14.3075	12.8961	14.6879	17.8425	13.2209	12.6296	16.382	27.9928	26.6008	21.2531
ENSMUSG00000072624	135.912	135.614	81.7307	146.066	108.786	119.278	105.906	224.134	253.526	208.408	210.504	243.298	214.617	217.708	-0.84748	4.8944e-18	1.8439e-16	Gm5460	chr14	+	34041078	34046981	1903	protein_coding	predicted_gene_5460	130	157	96	145	90	125	133	244	230	213	180	254	179	218	3.39818	3.36566	2.03197	3.59655	2.69033	2.92964	2.6731	5.26197	5.80462	4.85273
ENSMUSG00000034320	1514.89	1648.96	1334.08	1582.55	1479.49	1490.5	1856.14	3062.55	3276	2385.44	2675.74	2847.73	2846.37	2915.09	-0.8444	1.0184e-36	1.0122e-34	Slc26a2	chr18	-	61192919	61211612	7814	protein_coding	solute_carrier_family_26_(sulfate_transporter)_member_2	1449	1909	1567	1571	1224	1562	2331	3334	2972	2438	2288	2973	2374	2919	9.22437	9.96647	8.07756	9.48985	8.91065	8.91561	11.4096	17.5101	18.2667	13.5271
ENSMUSG00000052562	93.0474	68.2387	52.7844	78.5734	72.5241	72.5211	77.2395	180.96	202.821	103.715	106.422	129.312	148.673	151.796	-0.84427	9.2736e-11	1.8051e-09	Slc22a30	chr19	-	8335371	8405111	2598	protein_coding	solute_carrier_family_22_member_30	89	79	62	78	60	76	97	197	184	106	91	135	124	152	1.70409	1.2405	0.961252	1.41714	1.31375	1.30472	1.42802	3.11189	3.40144	1.76894
ENSMUSG00000037318	234.187	267.772	247.746	231.691	206.694	287.222	241.274	476.744	390.21	425.622	406.975	492.343	444.821	533.285	-0.84095	2.6603e-27	1.7321e-25	Traf3ip3	chr1	-	193175506	193201703	3372	protein_coding	TRAF3_interacting_protein_3	224	310	291	230	171	301	303	519	354	435	348	514	371	534	3.30447	3.75045	3.47608	3.21956	2.88476	3.98128	3.43682	6.3165	5.04197	5.59303
ENSMUSG00000087235	12.5457	1.72756	1.70272	9.06616	10.8786	11.4507	4.7777	31.2318	19.8412	8.80598	33.9145	24.9045	26.3775	24.9665	-0.83904	4.0055e-06	3.9043e-05	Gm4750	chrX	+	152432477	152434676	2200	pseudogene	predicted_gene_4750	12	2	2	9	9	12	6	34	18	9	29	26	22	25	0.271332	0.0370865	0.0366178	0.193097	0.232713	0.243277	0.104311	0.634239	0.392947	0.177364
ENSMUSG00000102097	26.1369	32.8237	18.7299	43.3161	26.5922	33.3979	38.2216	86.3466	91.4899	61.6419	66.6596	70.882	37.1683	54.9264	-0.83631	6.6342e-08	8.7733e-07	RP24-217M7.4	chr9	+	96705828	96711449	2814	antisense	RIKEN_cDNA_A930006L05_gene	25	38	22	43	22	35	48	94	83	63	57	74	31	55	0.441934	0.550894	0.314908	0.721275	0.444734	0.554737	0.652408	1.37088	1.41657	0.970649
ENSMUSG00000021336	358.598	309.233	263.071	336.455	273.174	333.979	383.809	577.787	767.193	460.846	582.395	630.275	510.765	701.06	-0.83539	5.3823e-18	2.0236e-16	Slc17a4	chr13	-	23897738	23915007	2638	protein_coding	solute_carrier_family_17_(sodium_phosphate)_member_4	343	358	309	334	226	350	482	629	696	471	498	658	426	702	6.46787	5.53627	4.71811	5.97624	4.87343	5.91748	6.98834	9.78527	12.6712	7.74091
ENSMUSG00000029672	3358.07	3477.58	3216.44	3935.72	3580.27	3668.04	3430.39	6233.49	6951.03	6395.1	6049.65	6062.33	6036.85	6647.09	-0.83465	4.6659e-78	1.4777e-75	Fam3c	chr6	-	22306520	22356243	2826	protein_coding	family_with_sequence_similarity_3_member_C	3212	4026	3778	3907	2962	3844	4308	6786	6306	6536	5173	6329	5035	6656	56.5386	58.118	53.8486	65.2571	59.6231	60.6673	58.305	98.5459	107.168	100.273
ENSMUSG00000056329	16.7276	33.6874	28.9463	10.0735	32.6359	33.3979	30.2588	68.8936	31.9664	45.0084	68.9986	68.0084	75.5356	59.9197	-0.83079	4.2331e-07	4.9375e-06	1810010K12Rik	chr2	+	19451828	19454995	1324	processed_transcript	RIKEN_cDNA_1810010K12_gene	16	39	34	10	27	35	38	75	29	46	59	71	63	60	0.601137	1.20167	1.03437	0.356507	1.16005	1.17903	1.09774	2.32472	1.05195	1.50631
ENSMUSG00000020878	104.548	105.381	107.271	127.934	101.534	126.912	113.072	208.518	246.913	174.163	214.012	186.784	194.234	214.712	-0.8127	9.2843e-20	3.8639e-18	Lrrc46	chr11	-	97034602	97041407	1336	protein_coding	leucine_rich_repeat_containing_46	100	122	126	127	84	133	142	227	224	178	183	195	162	215	3.72336	3.72531	3.79882	4.48698	3.57663	4.44006	4.06522	6.97295	8.05241	5.77643
ENSMUSG00000019850	4811.28	5151.59	5008.56	5282.55	5543.26	5084.11	5615.39	9502.72	9020.03	9387.18	9284.4	9641.87	8834.07	8699.34	-0.81005	3.246e-104	1.6393e-101	Tnfaip3	chr10	-	19000910	19015657	6199	protein_coding	tumor_necrosis_factor_alpha-induced_protein_3	4602	5964	5883	5244	4586	5328	7052	10345	8183	9594	7939	10066	7368	8711	36.9289	39.2487	38.2263	39.9298	42.0837	38.3342	43.5104	68.4866	63.398	67.1002
ENSMUSG00000024227	4339.77	4534.85	4442.4	5412.5	5048.89	4859.87	4983.94	7908.98	9750.84	7606.41	8575.7	9132.29	7993.59	8822.17	-0.80984	3.85e-46	5.5339e-44	2610034M16Rik	chr17	-	58878808	58991375	4174	protein_coding	RIKEN_cDNA_2610034M16_gene	4151	5250	5218	5373	4177	5093	6259	8610	8846	7774	7333	9534	6667	8834	49.47	51.3116	50.3543	60.7605	56.9264	54.4208	57.3528	84.654	101.784	80.7491
ENSMUSG00000025420	304.233	313.552	297.125	284.073	293.723	297.718	304.977	534.614	540.121	494.113	498.193	555.562	546.734	544.27	-0.80619	2.4828e-51	4.1422e-49	Katnal2	chr18	-	76977148	77047308	2039	protein_coding	katanin_p60_subunit_A-like_2	291	363	349	282	243	312	383	582	490	505	426	580	456	545	7.09933	7.2627	6.89434	6.52813	6.77939	6.82466	7.18429	11.7139	11.5415	10.7379
ENSMUSG00000085968	322.007	271.227	376.302	440.213	325.15	363.56	435.567	741.295	649.248	540.1	555.497	764.377	685.815	674.096	-0.80113	1.3362e-17	4.9053e-16	Gm13027	chr4	+	140131877	140133351	241	antisense	predicted_gene_13027	308	314	442	437	269	381	547	807	589	552	475	798	572	675	63.5734	53.1522	73.8737	85.5896	63.4946	70.5101	86.8105	137.421	117.377	99.3042
ENSMUSG00000087305	662.832	578.733	600.21	567.139	565.688	545.817	645.786	1080.25	1082.45	986.27	1004.57	1036.41	997.55	1158.45	-0.80042	1.0081e-52	1.7443e-50	A430035B10Rik	chr6	-	8488795	8510430	2010	processed_transcript	RIKEN_cDNA_A430035B10_gene	634	670	705	563	468	572	811	1176	982	1008	859	1082	832	1160	15.6904	13.5984	14.1279	13.2211	13.245	12.6924	15.4322	24.0109	23.4639	21.7425
ENSMUSG00000029641	72.1378	75.1489	80.0279	68.4999	82.194	87.7887	99.5355	139.624	156.525	174.163	168.403	121.649	135.484	144.806	-0.79713	1.01e-14	2.9629e-13	Rasl11a	chr5	+	146845071	146847726	1126	protein_coding	RAS-like_family_11_member_A	69	87	94	68	68	92	125	152	142	178	144	127	113	145	3.04826	3.15203	3.36259	2.85054	3.43536	3.64412	4.24594	5.5399	6.05668	6.85374
ENSMUSG00000004655	1592.26	1866.63	1821.06	1680.26	1861.45	1764.36	1855.34	3133.28	3143.73	3063.5	3049.97	3005.78	3353.54	2931.07	-0.78997	2.8739e-82	1.0132e-79	Aqp1	chr6	+	55336432	55348555	2627	protein_coding	aquaporin_1	1523	2161	2139	1668	1540	1849	2330	3411	2852	3131	2608	3138	2797	2935	28.8391	33.5586	32.7971	29.9704	33.3474	31.3921	33.9233	53.2867	52.1403	51.6736
ENSMUSG00000094690	23.0005	42.3252	21.284	28.2058	18.131	25.7641	32.6476	78.0794	59.5236	41.0946	45.6092	51.7247	49.1581	68.9076	-0.78977	2.9511e-07	3.5349e-06	1600014C23Rik	chr17	-	45732864	45733844	518	protein_coding	RIKEN_cDNA_1600014C23_gene	22	49	25	28	15	27	41	85	54	42	39	54	41	69	2.11268	3.859	1.94399	2.55144	1.64726	2.32476	3.0273	6.7342	5.00666	3.51532
ENSMUSG00000099373	1110.3	1087.5	903.294	1076.86	998.416	1069.69	1235.83	1807.77	2469.13	1523.43	1818.52	1995.23	1770.89	1838.54	-0.78077	3.0662e-23	1.5569e-21	RP23-435I22.4	chr9	+	105470520	105480194	3334	antisense	predicted_gene_19667	1062	1259	1061	1069	826	1121	1552	1968	2240	1557	1555	2083	1477	1841	15.8453	15.4053	12.8184	15.1345	14.0934	14.9963	17.8044	24.2246	32.2676	20.2474
ENSMUSG00000087569	1.04548	1.72756	0.851361	2.0147	0	0.954225	0	8.26723	13.2275	1.95689	7.0168	10.5365	5.99489	7.98929	-0.77964	3.3793e-06	3.3305e-05	Gm8464	chrX	-	152489661	152491860	2200	pseudogene	predicted_pseudogene_8464	1	2	1	2	0	1	0	9	12	2	6	11	5	8	0.022611	0.0370865	0.0183089	0.0429105	0	0.0202731	0	0.167887	0.261965	0.0394142
ENSMUSG00000082415	4.1819	8.6378	10.2163	13.0956	6.04368	5.72535	7.16656	17.453	19.8412	19.5689	19.8809	15.3258	15.5867	28.9612	-0.77601	1.3021e-05	0.00011375	Gm12486	chr3	-	101206859	101207399	541	pseudogene	predicted_gene_12486	4	10	12	13	5	6	9	19	18	20	17	16	13	29	0.367794	0.75407	0.893446	1.13423	0.525744	0.494649	0.636279	1.4413	1.59794	1.6028
ENSMUSG00000036395	3782.53	3493.99	2857.17	3614.38	3574.23	3420.9	3805.44	6611.03	6320.52	5640.72	5622.8	6054.67	5704.74	6492.3	-0.77097	1.1603e-42	1.4851e-40	Glb1l2	chr9	-	26763044	26806468	3701	protein_coding	galactosidase_beta_1-like_2	3618	4045	3356	3588	2957	3585	4779	7197	5734	5765	4808	6321	4758	6501	48.6285	44.587	36.5248	45.7604	45.45	43.203	49.3878	79.8049	74.4086	67.5345
ENSMUSG00000098959	10.4548	16.4118	8.51361	21.1544	3.62621	12.4049	17.5182	36.7432	37.4778	18.5904	45.6092	31.6096	23.9796	22.9692	-0.77005	1.2725e-05	0.00011163	Gm27230	chr9	+	72395974	72404510	857	processed_transcript	predicted_gene_27230	10	19	10	21	3	13	22	40	34	19	39	33	20	23	0.580445	0.904444	0.470006	1.15663	0.199132	0.676559	0.981847	1.91547	1.90538	0.961211
ENSMUSG00000021123	5886.03	5952.31	6123.84	6062.24	6293.89	6348.46	5656.8	10833.7	10162	10519.2	10168.5	10043.2	10190.1	10075.5	-0.76165	2.9394e-142	2.388e-139	Rdh12	chr12	+	79208914	79222665	2753	protein_coding	retinol_dehydrogenase_12	5630	6891	7193	6018	5207	6653	7104	11794	9219	10751	8695	10485	8499	10089	101.729	102.114	105.242	103.182	107.593	107.784	98.6958	175.813	160.828	169.312
ENSMUSG00000084826	1835.86	1816.53	1746.99	1863.6	1792.55	2006.74	2032.91	3496.12	3199.94	3293.44	3079.21	3240.46	2978.26	3073.88	-0.76092	3.9007e-69	1.0124e-66	AI847159	chr2	-	129158666	129180667	952	antisense	expressed_sequence_AI847159	1756	2103	2052	1850	1483	2103	2553	3806	2903	3366	2633	3383	2484	3078	91.7549	90.1179	86.821	91.7258	88.6147	98.5248	102.569	164.07	146.452	153.293
ENSMUSG00000045690	63.774	63.056	63.0007	66.4852	64.063	62.9789	65.2953	99.2067	127.865	102.736	100.574	137.933	131.888	103.861	-0.75956	1.14e-12	2.7523e-11	Wdr89	chr12	-	75630596	75669537	2979	protein_coding	WD_repeat_domain_89	61	73	74	66	53	66	82	108	116	105	86	144	110	104	1.01859	0.999681	1.00057	1.04576	1.01206	0.988136	1.0528	1.48782	1.87013	1.52814
ENSMUSG00000075044	67.9559	54.4182	25.5408	64.4705	33.8446	61.0704	61.3139	140.543	170.855	46.9652	114.608	158.048	99.5152	130.825	-0.75806	1.7399e-05	0.00014927	Slc22a29	chr19	-	8160165	8218900	2271	protein_coding	solute_carrier_family_22._member_29	65	63	30	64	28	64	77	153	155	48	98	165	83	131	1.42376	1.1317	0.532094	1.33021	0.701362	1.25692	1.29681	2.76485	3.27793	0.916368
ENSMUSG00000089742	94.0928	126.976	105.569	97.7131	76.1503	74.4296	107.498	190.146	186.287	144.809	148.522	179.121	160.663	220.704	-0.75596	1.088e-11	2.3694e-10	Gm15898	chr8	+	120095060	120097736	627	sense_intronic	predicted_gene_15898	90	147	124	97	63	78	135	207	169	148	127	187	134	221	7.1403	9.56442	7.96597	7.30232	5.71577	5.54843	8.23509	13.5488	12.945	10.2339
ENSMUSG00000100259	763.197	768.765	765.374	747.455	736.12	800.595	809.024	1446.77	1420.85	1101.73	1201.04	1316.11	1378.82	1338.21	-0.75254	5.1462e-42	6.3684e-40	Rplp2-ps1	chr12	+	75630290	75637769	3835	pseudogene	ribosomal_protein_large_P2_pseudogene_1	730	890	899	742	609	839	1016	1575	1289	1126	1027	1374	1150	1340	9.46889	9.46746	9.44232	9.13262	9.03344	9.75753	10.1328	16.8544	16.1425	12.7297
ENSMUSG00000050677	139.048	141.66	148.137	186.36	161.971	191.799	153.683	297.62	242.503	272.007	301.723	283.528	276.964	266.643	-0.75128	1.592e-20	6.9831e-19	Ccdc96	chr5	+	36484588	36488172	3585	protein_coding	coiled-coil_domain_containing_96	133	164	174	185	134	201	193	324	220	278	258	296	231	267	1.84546	1.86622	1.95499	2.43579	2.12626	2.50063	2.05907	3.70897	2.94726	3.36203
ENSMUSG00000100593	112.911	81.1954	91.0956	133.978	78.5678	84.926	101.128	188.309	217.151	160.465	139.167	177.205	137.882	206.723	-0.74717	1.6079e-10	3.0442e-09	RP23-80O10.1	chr16	-	34935854	34939329	588	antisense	RIKEN_cDNA_1700119H24_gene	108	94	107	133	65	89	127	205	197	164	119	185	115	207	9.13668	6.52168	7.32978	10.6766	6.28836	6.75081	8.26092	14.3078	16.0906	12.0924
ENSMUSG00000078588	530.056	464.714	478.465	552.029	565.688	562.039	551.825	1004.01	888.444	883.534	878.27	965.528	714.591	986.677	-0.74578	6.7062e-28	4.4915e-26	Ccdc24	chr4	-	117866524	117872557	3990	protein_coding	coiled-coil_domain_containing_24	507	538	562	548	468	589	693	1093	806	903	751	1008	596	988	6.32087	5.5007	5.67346	6.48282	6.67228	6.58394	6.64297	11.242	9.70167	9.81207
ENSMUSG00000034452	24428.6	24445.9	23631.2	25186.8	24867.3	26742.2	23300.9	40933.8	44265.7	41253.1	41424.9	40806	40193.3	41190.8	-0.74318	1.3987e-119	8.4312e-117	Slc24a1	chr9	-	64922861	64951607	5213	protein_coding	solute_carrier_family_24_(sodium/potassium/calcium_exchanger)_member_1	23366	28301	27757	25003	20573	28025	29262	44562	40158	42162	35422	42601	33523	41246	222.966	221.474	214.471	226.392	224.497	239.774	214.693	350.812	369.972	350.654
ENSMUSG00000010136	9.40928	2.59134	5.95953	5.03676	9.66988	8.58803	6.37027	22.9645	26.4549	18.5904	10.5252	17.2416	9.59182	15.9786	-0.74267	4.1459e-05	0.00032523	Pifo	chr3	-	105996957	106014646	956	protein_coding	primary_cilia_formation	9	3	7	5	8	9	8	25	24	19	9	18	8	16	0.468302	0.128018	0.294934	0.24687	0.476029	0.419883	0.320062	1.0732	1.2057	0.861671
ENSMUSG00000026831	38.6826	31.9599	40.8653	34.2499	27.8009	52.4824	23.8885	73.4865	59.5236	69.4694	67.8291	70.882	61.1479	59.9197	-0.74264	3.9789e-08	5.4548e-07	1700007K13Rik	chr2	-	28462001	28466332	812	protein_coding	RIKEN_cDNA_1700007K13_gene	37	37	48	34	23	55	30	80	54	71	58	74	51	60	2.26667	1.85889	2.38106	1.97642	1.61129	3.02099	1.41308	4.04325	3.19391	3.79095
ENSMUSG00000086344	30.3188	37.1426	33.2031	35.2573	36.2621	45.8028	29.4625	62.4635	88.1831	52.8359	88.8795	72.7978	38.3673	64.913	-0.73742	3.9293e-07	4.6149e-06	Gm11345	chr13	-	24366776	24375950	621	lincRNA	predicted_gene_11345	29	43	39	35	30	48	37	68	80	54	76	76	32	65	2.32299	2.82479	2.52963	2.66032	2.74809	3.44741	2.27883	4.49381	6.18704	3.77006
ENSMUSG00000083356	48.0919	17.2756	23.8381	30.2205	22.966	23.8556	30.2588	68.8936	83.7739	52.8359	25.7283	47.8933	67.1428	57.9223	-0.73713	8.5821e-06	7.8457e-05	Gm11708	chr11	-	107003909	107004740	832	pseudogene	predicted_gene_11708	46	20	28	30	19	25	38	75	76	54	22	50	56	58	2.75028	0.980653	1.35556	1.70198	1.29907	1.34017	1.74688	3.69943	4.38707	2.81395
ENSMUSG00000020212	3445.89	3306.55	3196.86	3758.43	3334.9	3246.27	3455.87	5608.86	6768.05	5523.31	5301.19	5789.34	5570.45	5367.8	-0.73531	1.8997e-48	2.9582e-46	Mdm1	chr10	+	118141787	118168997	3149	protein_coding	transformed_mouse_3T3_cell_double_minute_1	3296	3828	3755	3731	2759	3402	4340	6106	6140	5645	4533	6044	4646	5375	52.0663	49.5916	48.031	55.9254	49.8403	48.1842	52.7132	79.5758	93.644	77.7208
ENSMUSG00000048502	18.8186	33.6874	12.7704	12.0882	10.8786	10.4965	11.9443	49.6034	39.6824	26.4179	16.3725	37.3568	46.7601	37.9491	-0.73222	3.4642e-05	0.00027652	Duxbl1	chr14	+	25978577	25990088	2266	protein_coding	double_homeobox_B-like_1	18	39	15	12	9	11	15	54	36	27	14	39	39	38	0.395143	0.702124	0.266634	0.249964	0.225935	0.216509	0.253182	0.977982	0.763004	0.516594
ENSMUSG00000042282	4709.87	4901.95	4756.55	5258.37	4480.78	5352.25	5460.92	7403.76	9047.58	8100.53	8491.5	8866.96	8366.47	8146.08	-0.72793	9.9813e-49	1.5806e-46	Gucy2f	chrX	-	142081160	142196931	8122	protein_coding	guanylate_cyclase_2f	4505	5675	5587	5220	3707	5609	6858	8060	8208	8279	7261	9257	6978	8157	27.5914	28.5044	27.7077	30.3364	25.9634	30.8011	32.2951	40.7257	48.5354	44.1937
ENSMUSG00000023978	65763.6	64705.8	67094.1	69709.7	71461.7	72757.8	63533.9	114209	112484	117330	109811	112213	108413	115600	-0.72782	5.9757e-106	3.1017e-103	Prph2	chr17	+	46910459	46924933	2665	protein_coding	peripherin_2	62903	74910	78808	69201	59121	76248	79788	124332	102046	119915	93898	117149	90421	115755	1174.13	1146.7	1191.13	1225.67	1261.96	1276.07	1145.1	1914.62	1839.01	1950.84
ENSMUSG00000076434	38.6826	44.9166	48.5276	30.2205	27.8009	49.6197	36.6291	60.6263	55.1144	78.2754	59.6428	77.5871	93.5203	86.8835	-0.72458	1.467e-07	1.8521e-06	Wfdc3	chr2	-	164731180	164745931	1619	protein_coding	WAP_four-disulfide_core_domain_3	37	52	57	30	23	52	46	66	50	80	51	81	78	87	1.13683	1.31028	1.41812	0.874643	0.808132	1.43252	1.08671	1.67299	1.48323	2.14234
ENSMUSG00000090080	111.866	89.8332	95.3524	123.904	108.786	121.187	148.905	257.203	166.446	152.637	196.47	202.11	194.234	235.684	-0.72416	1.7832e-10	3.3589e-09	Gm15872	chr1	+	193187375	193192011	639	antisense	predicted_gene_15872	107	104	112	123	90	127	187	280	151	156	168	211	162	236	8.32961	6.63959	7.05995	9.08575	8.01204	8.86434	11.1929	17.9827	11.3491	10.5845
ENSMUSG00000028188	787.243	735.941	830.077	912.66	701.067	864.528	863.968	1342.05	1477.07	1229.9	1294.6	1530.67	1382.42	1291.27	-0.72292	6.6808e-33	5.7265e-31	Spata1	chr3	-	146457203	146499753	2712	protein_coding	spermatogenesis_associated_1	753	852	975	906	580	906	1085	1461	1340	1257	1107	1598	1153	1293	13.8117	12.8162	14.481	15.7687	12.1658	14.8998	15.3018	22.1084	23.7301	20.0952
ENSMUSG00000056043	16322	16853.2	16036.2	17478.6	16871.5	17378.3	17713.3	29818.1	30756.1	26304.4	25390.3	28738.8	27361.9	28642.6	-0.72219	1.0045e-69	2.7602e-67	Rgs9bp	chr7	-	35578993	35585582	6590	protein_coding	regulator_of_G-protein_signalling_9_binding_protein	15612	19511	18836	17351	13958	18212	22245	32461	27902	26884	21711	30003	22821	28681	117.846	120.782	115.13	124.278	120.487	123.258	129.107	202.15	203.345	176.87
ENSMUSG00000029491	31384.1	30963.9	32658.2	35918.1	33739.4	34952.3	30913.3	55379.4	56001.8	54810.4	54938.1	53834	53994.8	52615.5	-0.7201	1.1796e-91	5.126e-89	Pde6b	chr5	+	108388391	108432397	4088	protein_coding	phosphodiesterase_6B_cGMP_rod_receptor_beta_polypeptide	30019	35847	38360	35656	27913	36629	38822	60288	50805	56018	46977	56202	45034	52686	365.281	357.726	377.966	411.698	388.416	399.629	363.219	605.225	596.87	594.104
ENSMUSG00000048038	25.0914	30.2323	22.1354	46.3382	31.4271	24.8099	53.351	69.8122	67.2396	41.0946	56.1344	84.2922	57.5509	77.8956	-0.72005	4.4333e-06	4.2856e-05	4932418E24Rik	chr2	-	26271646	26294557	3148	protein_coding	RIKEN_cDNA_4932418E24_gene	24	35	26	46	26	26	67	76	61	42	48	88	48	78	0.379244	0.453568	0.332677	0.689731	0.469829	0.368368	0.814033	0.990777	0.930635	0.578443
ENSMUSG00000040204	36.5917	43.189	63.0007	34.2499	36.2621	38.169	46.9808	80.8351	81.5693	66.5341	80.6932	65.1348	88.7244	77.8956	-0.71804	2.3633e-08	3.3304e-07	2810417H13Rik	chr9	+	65890237	65903266	2530	protein_coding	RIKEN_cDNA_2810417H13_gene	35	50	74	34	30	40	59	88	74	68	69	68	74	78	0.68816	0.806229	1.17814	0.63433	0.674531	0.705152	0.891936	1.42744	1.40474	1.16529
ENSMUSG00000091957	213.277	169.301	229.867	255.867	184.937	172.715	223.756	381.211	399.028	391.377	321.603	370.694	346.505	268.64	-0.71672	4.4566e-14	1.2429e-12	Rps2-ps10	chr18	-	61259008	61259972	965	pseudogene	ribosomal_protein_S2_pseudogene_10	204	196	270	254	153	181	281	415	362	400	275	387	289	269	10.5159	8.28586	11.2699	12.424	9.01915	8.36555	11.1373	17.6489	18.0163	17.9713
ENSMUSG00000026121	236.278	183.121	230.719	239.75	232.077	185.12	273.922	392.234	356.039	362.024	371.891	420.503	344.107	416.442	-0.71367	1.9264e-18	7.4373e-17	Sema4c	chr1	-	36548642	36558381	3805	protein_coding	sema_domain_immunoglobulin_domain_(Ig)_transmembrane_domain_(TM)_and_short_cytoplasmic_domain_(semaphorin)_4C	226	212	271	238	192	194	344	427	323	370	318	439	287	417	2.95458	2.27295	2.86879	2.95243	2.87044	2.274	3.45785	4.60543	4.07692	4.21592
ENSMUSG00000091844	32.4098	25.9134	29.7976	30.2205	25.3834	24.8099	22.296	53.2777	72.751	43.0515	50.2871	54.5983	37.1683	41.9438	-0.71302	9.6038e-07	1.0488e-05	Gm8251	chr1	-	44055952	44061936	5985	protein_coding	predicted_gene_8251	31	30	35	30	21	26	28	58	66	44	43	57	31	42	0.257655	0.204487	0.235553	0.236599	0.199598	0.193755	0.178935	0.397705	0.52962	0.318738
ENSMUSG00000096140	18.8186	10.3654	8.51361	9.06616	12.0874	3.8169	9.55541	38.5804	40.7847	22.5042	11.6947	22.0309	11.9898	29.9598	-0.71052	8.8006e-05	0.00063945	Ankrd66	chr17	-	43534174	43543639	1321	protein_coding	ankyrin_repeat_domain_66	18	12	10	9	10	4	12	42	37	23	10	23	10	30	0.677815	0.370585	0.304917	0.321585	0.430624	0.135052	0.347441	1.3048	1.34519	0.754868
ENSMUSG00000071648	24864.6	23962.1	25380.8	25776.1	27179.6	26867.2	22120.8	42769.1	40628.1	42897.9	39974.7	40978.4	40337.2	42328.2	-0.71003	1.8799e-69	5.0184e-67	Rom1	chr19	-	8927382	8929356	1526	protein_coding	rod_outer_segment_membrane_protein_1	23783	27741	29812	25588	22486	28156	27780	46560	36858	43843	34182	42781	33643	42385	775.272	741.611	786.903	791.477	838.222	822.924	696.273	1252.15	1160.01	1245.64
ENSMUSG00000082274	30.3188	27.641	27.2436	27.1985	16.9223	22.9014	35.0365	39.499	90.3877	42.073	44.4398	55.5562	44.3622	46.9371	-0.70544	7.4593e-06	6.9037e-05	Gm14026	chr2	+	129168700	129170488	1789	pseudogene	predicted_gene_14026	29	32	32	27	14	24	44	43	82	43	38	58	37	47	0.806361	0.729707	0.720484	0.712377	0.445163	0.598335	0.940685	0.986405	2.20134	1.04209
ENSMUSG00000049969	1708.31	1926.23	1535.86	1734.66	1564.1	1647.95	1849.77	2944.05	3030.19	2862.92	2585.69	2896.58	2762.44	2628.48	-0.70448	2.5009e-42	3.1576e-40	Plekhf2	chr4	-	10988662	11007927	2977	protein_coding	pleckstrin_homology_domain_containing_family_F_(with_FYVE_domain)_member_2	1634	2230	1804	1722	1294	1727	2323	3205	2749	2926	2211	3024	2304	2632	27.3033	30.5587	24.4086	27.303	24.7262	25.8736	29.8451	44.1821	44.3486	42.6129
ENSMUSG00000029410	3774.17	3320.37	3604.66	3897.44	3756.75	3440.94	3624.68	6077.33	6118.8	5771.83	6001.71	5816.16	6389.35	5491.64	-0.70439	2.2812e-68	5.6836e-66	Ppef2	chr5	-	92226974	92253159	2274	protein_coding	protein_phosphatase_EF_hand_calcium-binding_domain_2	3610	3844	4234	3869	3108	3606	4552	6616	5551	5899	5132	6072	5329	5499	78.9693	68.9607	74.9972	80.3091	77.7485	70.7259	76.5621	119.399	117.237	112.469
ENSMUSG00000085319	14.6367	6.91024	15.3245	12.0882	9.66988	21.9472	26.2774	30.3132	35.2732	21.5257	26.8977	45.9775	29.9744	36.9505	-0.69971	5.2324e-05	0.00040203	Gm13330	chr2	+	18032533	18039633	388	antisense	predicted_gene_13330	14	8	18	12	8	23	33	33	32	22	23	48	25	37	1.79489	0.841138	1.86864	1.45984	1.1729	2.64387	3.253	3.49043	3.96098	2.45831
ENSMUSG00000086690	31.3643	27.641	30.649	38.2793	24.1747	36.2606	26.2774	53.2777	41.887	53.8143	46.7787	56.5141	57.5509	78.8942	-0.6991	8.1564e-07	9.0345e-06	4933406J10Rik	chr7	-	82743368	82755644	963	antisense	RIKEN_cDNA_4933406J10_gene	30	32	36	38	20	38	33	58	38	55	40	59	48	79	1.54966	1.3556	1.50578	1.86258	1.18142	1.75995	1.31066	2.47172	1.89514	2.47618
ENSMUSG00000089842	638.786	642.653	678.535	766.594	627.334	713.76	714.267	1286.93	960.093	1095.86	1022.11	1119.74	1082.68	1333.21	-0.69853	9.3461e-25	5.3407e-23	Pitpnm2os2	chr5	+	124194907	124200346	828	lincRNA	phosphatidylinositol_transfer_protein_membrane-associated_2_opposite_strand_2	611	744	797	761	519	748	897	1401	871	1120	874	1169	903	1335	36.7073	36.6565	38.7715	43.3821	35.6565	40.2916	41.4347	69.4392	50.521	58.6453
ENSMUSG00000049928	3821.21	3832.59	2348.91	3120.77	2672.51	2729.08	3093.56	6303.3	6343.67	4633.9	4518.82	4956	4411.04	6445.36	-0.69772	8.2033e-09	1.2302e-07	Glp2r	chr11	-	67661502	67771153	4873	protein_coding	glucagon-like_peptide_2_receptor	3655	4437	2759	3098	2211	2860	3885	6862	5755	4736	3864	5174	3679	6454	37.3106	37.1451	22.8055	30.0083	25.8103	26.1766	30.4928	57.7898	56.7196	42.1367
ENSMUSG00000019874	2.09095	7.77402	9.36497	14.1029	15.7136	15.2676	10.3517	25.7203	14.3297	34.2455	21.0504	26.8202	17.9847	24.9665	-0.69684	9.0498e-05	0.00065342	Fabp7	chr10	+	57784881	57788450	880	protein_coding	fatty_acid_binding_protein_7_brain	2	9	11	14	13	16	13	28	13	35	18	28	15	25	0.113055	0.417223	0.503494	0.750934	0.840354	0.810925	0.565019	1.30579	0.709488	1.72437
ENSMUSG00000100175	2.09095	2.59134	1.70272	12.0882	6.04368	5.72535	9.55541	26.6388	15.432	12.7198	14.0336	18.1994	11.9898	11.9839	-0.69471	0.00013246	0.000908	RP23-153H17.1	chr5	-	73268581	73284186	734	lincRNA	RIKEN_cDNA_1700025M24_gene	2	3	2	12	5	6	12	29	14	13	12	19	10	12	0.135543	0.166738	0.109754	0.771688	0.387503	0.364585	0.625298	1.62143	0.916044	0.767879
ENSMUSG00000030956	2586.51	2619.85	2738.83	3199.35	3076.23	2986.72	3043.4	4825.31	4654.96	4668.15	4749.21	4852.55	4552.52	4686.72	-0.69349	2.4676e-53	4.3914e-51	Fam53b	chr7	-	132712082	132813886	5465	protein_coding	family_with_sequence_similarity_53_member_B	2474	3033	3217	3176	2545	3130	3822	5253	4223	4771	4061	5066	3797	4693	22.5191	22.6408	23.7108	27.4313	26.491	25.5445	26.7487	39.447	37.1121	37.8499
ENSMUSG00000079537	12.5457	12.0929	20.4327	19.1397	8.46115	15.2676	16.722	37.6618	29.7618	21.5257	18.7115	31.6096	41.9642	30.9585	-0.69248	3.7631e-05	0.00029795	C030048H21Rik	chr2	-	26251757	26257554	666	protein_coding	RIKEN_cDNA_C030048H21_gene	12	14	24	19	7	16	21	41	27	22	16	33	35	31	0.89629	0.857556	1.45152	1.34659	0.597895	1.07149	1.206	2.52643	1.94704	1.43217
ENSMUSG00000097882	90.9564	76.8765	54.4871	78.5734	49.5582	98.2852	92.3689	152.484	165.343	106.65	119.286	133.143	119.898	149.799	-0.69214	3.5536e-08	4.8897e-07	0610038B21Rik	chr8	+	77517056	77523898	1687	antisense	RIKEN_cDNA_0610038B21_gene	87	89	64	78	41	103	116	166	150	109	102	139	100	150	2.56535	2.15221	1.52809	2.18241	1.38252	2.72311	2.62993	4.03822	4.27032	2.80128
ENSMUSG00000028909	799.789	732.486	646.183	775.661	724.033	691.813	856.802	1208.85	1273.14	1085.09	1199.87	1250.97	1380.02	1161.44	-0.69013	6.9749e-30	5.1719e-28	Ptpru	chr4	-	131768457	131838288	5484	protein_coding	protein_tyrosine_phosphatase_receptor_type_U	765	848	759	770	599	725	1076	1316	1155	1109	1026	1306	1151	1163	6.93914	6.30823	5.57479	6.6275	6.21342	5.89636	7.50442	9.84817	10.1151	8.76758
ENSMUSG00000039763	522.738	577.005	553.385	543.97	533.052	542	608.361	923.174	907.183	907.016	820.966	828.554	962.779	983.681	-0.68955	3.0299e-40	3.4522e-38	Dnajc28	chr16	-	91614257	91619026	3535	protein_coding	DnaJ_(Hsp40)_homolog_subfamily_C_member_28	500	668	650	540	441	568	764	1005	823	927	702	865	803	985	7.03594	7.70896	7.40642	7.21043	7.0966	7.16642	8.2662	11.6674	11.1814	11.3694
ENSMUSG00000026409	4091.99	3906.88	3961.38	4449.47	3772.46	4280.65	4226.68	6934.37	7165.98	5985.13	6204.02	7251.04	6785.02	6290.57	-0.68768	3.5955e-46	5.2082e-44	Pfkfb2	chr1	-	130689182	130729253	4505	protein_coding	6-phosphofructo-2-kinase/fructose-26-biphosphatase_2	3914	4523	4653	4417	3121	4486	5308	7549	6501	6117	5305	7570	5659	6299	43.2183	40.9582	41.6028	46.2796	39.4094	44.4128	45.0649	68.7688	69.3058	58.8694
ENSMUSG00000101854	8.36381	7.77402	4.25681	6.04411	1.20874	7.6338	3.18514	16.5345	12.1252	8.80598	17.542	16.2837	10.7908	15.9786	-0.68687	0.00015812	0.0010617	RP23-428G22.1	chr8	-	71006727	71026755	483	lincRNA	RIKEN_cDNA_1700026F02_gene	8	9	5	6	1	8	4	18	11	9	15	17	9	16	0.823919	0.760159	0.416972	0.586355	0.117775	0.738731	0.316749	1.5294	1.09378	0.807869
ENSMUSG00000048292	29.2733	29.3685	23.8381	22.1617	13.2961	25.7641	21.4997	43.1733	50.7053	42.073	28.0672	45.0197	50.3571	44.9397	-0.68282	5.0588e-06	4.8355e-05	Olfr1417	chr19	-	11828077	11829024	948	protein_coding	olfactory_receptor_1417	28	34	28	22	11	27	27	47	46	43	24	47	42	45	1.46924	1.46312	1.18969	1.0954	0.660063	1.27028	1.08933	2.03464	2.33042	1.96655
ENSMUSG00000035504	16363.8	15827	14562.5	16945.7	17288.5	16258.1	14627.7	26386.2	28625.3	25998.2	26520	23947.6	23190.6	26336.7	-0.6819	2.34e-45	3.2631e-43	Reep6	chr10	+	80329953	80336441	2208	protein_coding	receptor_accessory_protein_6	15652	18323	17105	16822	14303	17038	18370	28725	25969	26571	22677	25001	19342	26372	352.625	338.537	312.039	359.613	368.493	344.162	318.209	533.898	564.86	521.741
ENSMUSG00000025386	24214.3	24865.6	25107.5	24073.7	25676	27410.1	21862	41966.3	39655.9	40600.5	38866.1	39703.5	39001.5	39634.9	-0.68188	3.99e-67	9.8102e-65	Pde6g	chr11	-	120447605	120453500	2250	protein_coding	phosphodiesterase_6G_cGMP-specific_rod_gamma	23161	28787	29491	23898	21242	28725	27455	45686	35976	41495	33234	41450	32529	39688	512.055	521.943	527.948	501.344	537.049	569.404	466.703	833.293	767.918	799.575
ENSMUSG00000085327	71.0924	63.056	39.1626	64.4705	53.1844	41.0317	66.0916	104.718	99.206	107.629	112.269	95.7865	103.112	67.909	-0.67919	1.083e-07	1.3937e-06	Gm16104	chr10	+	81409575	81411579	401	antisense	predicted_gene_16104	68	73	46	64	44	43	83	114	90	110	96	100	86	68	8.43541	7.42655	4.6206	7.53342	6.2418	4.78264	7.91655	11.667	10.7791	11.8931
ENSMUSG00000074259	1912.18	1747.43	1664.41	2004.63	1628.17	1829.25	2133.24	3369.35	3462.29	2406.97	2744.74	3292.18	2949.49	2889.13	-0.67907	7.7246e-21	3.4285e-19	Gramd2	chr9	+	59680144	59718874	4579	protein_coding	GRAM_domain_containing_2	1829	2023	1955	1990	1347	1917	2679	3668	3141	2460	2347	3437	2460	2893	19.8694	18.0233	17.1973	20.5135	16.7339	18.6722	22.3771	32.8742	32.9444	23.2922
ENSMUSG00000087437	5.22738	10.3654	8.51361	12.0882	10.8786	1.90845	9.55541	30.3132	27.5572	9.78443	12.8641	31.6096	14.3877	17.9759	-0.67874	0.00018801	0.0012362	Gm13112	chr4	-	154864506	154872003	1258	antisense	predicted_gene_13112	5	12	10	12	9	2	12	33	25	10	11	33	12	18	0.197711	0.389143	0.320187	0.450254	0.406971	0.0709076	0.36484	1.07654	0.954429	0.34464
ENSMUSG00000029064	73693.5	74067.4	68551.6	70757.4	73341.2	78163.4	67757.4	117779	125720	116859	110552	111173	109752	121371	-0.67581	7.2599e-69	1.8583e-66	Gnb1	chr4	+	155491361	155559269	3143	protein_coding	guanine_nucleotide_binding_protein_(G_protein)_beta_1	70488	85748	80520	70241	60676	81913	85092	128218	114054	119434	94532	116063	91538	121534	1115.61	1112.98	1031.91	1054.88	1098.18	1162.39	1035.49	1674.18	1742.81	1647.51
ENSMUSG00000048327	6.27286	7.77402	6.81089	5.03676	2.41747	4.77113	11.148	11.023	15.432	11.7413	10.5252	19.1573	23.9796	17.9759	-0.67313	0.0002071	0.0013451	Ckap2l	chr2	-	129268210	129297212	3137	protein_coding	cytoskeleton_associated_protein_2-like	6	9	8	5	2	5	14	12	14	12	9	20	20	18	0.0951434	0.117041	0.102721	0.0752336	0.0362674	0.0710884	0.170693	0.156987	0.214337	0.165849
ENSMUSG00000022844	548.875	510.494	675.981	657.8	624.916	613.567	565.362	1052.69	880.728	1008.77	894.642	910.93	980.764	1057.58	-0.67274	5.2603e-26	3.2547e-24	Pdia5	chr16	-	35397313	35490873	1808	protein_coding	protein_disulfide_isomerase_associated_5	525	591	794	653	517	643	710	1146	799	1031	765	951	818	1059	14.4445	13.3352	17.6891	17.0479	16.2665	15.8619	15.0197	26.0126	21.2243	24.7233
ENSMUSG00000086368	212.232	183.121	168.569	166.213	166.806	168.898	196.682	316.91	419.972	224.063	257.283	296.938	286.556	300.597	-0.67202	3.5873e-11	7.3582e-10	Gm13830	chr5	+	115301120	115319208	1851	processed_transcript	predicted_gene_13830	203	212	198	165	138	177	247	345	381	229	220	310	239	301	5.45546	4.67238	4.30867	4.2076	4.24106	4.26491	5.10379	7.64909	9.8856	5.36383
ENSMUSG00000017146	173.549	196.942	175.38	191.397	195.815	200.387	195.886	308.643	378.085	286.684	286.519	350.579	280.561	277.628	-0.67182	1.6403e-17	5.9747e-16	Brca1	chr11	-	101488764	101551955	6572	protein_coding	breast_cancer_1	166	228	206	190	162	210	246	336	343	293	245	366	234	278	1.25647	1.41529	1.26257	1.36462	1.40223	1.42516	1.43166	2.09816	2.50658	1.93293
ENSMUSG00000058743	8585.45	8727.64	8488.07	10012.1	9096.94	9024.11	8208.89	14572.4	14856.6	14373.3	13643	13757.8	13373.4	14930	-0.67056	6.5403e-59	1.3888e-56	Kcnj14	chr7	-	45816461	45824756	2654	protein_coding	potassium_inwardly-rectifying_channel_subfamily_J_member_14	8212	10104	9970	9939	7526	9457	10309	15864	13478	14690	11666	14363	11154	14950	153.918	155.311	151.314	176.766	161.311	158.926	148.565	245.306	243.898	239.975
ENSMUSG00000040680	83.6381	68.2387	87.6902	81.5955	64.063	66.7958	80.4247	147.892	141.093	118.392	108.76	107.281	119.898	146.803	-0.66935	3.3354e-10	6.1344e-09	Kremen2	chr17	-	23741200	23745829	2116	protein_coding	kringle_containing_transmembrane_protein_2	80	79	103	81	53	70	101	161	128	121	93	112	100	147	1.88069	1.52307	1.96068	1.80687	1.42483	1.47545	1.82561	3.12253	2.90522	2.47922
ENSMUSG00000051627	49.1374	43.189	45.1221	36.2646	49.5582	55.3451	56.5362	71.6493	50.7053	82.1892	113.438	109.197	89.9233	72.9023	-0.66934	1.3609e-06	1.4498e-05	Hist1h1e	chr13	-	23621755	23622502	748	protein_coding	histone_cluster_1_H1e	47	50	53	36	41	58	71	78	46	84	97	114	75	73	3.12563	2.72695	2.85403	2.27173	3.11805	3.45836	3.63044	4.27947	2.95353	4.86882
ENSMUSG00000026669	90.9564	58.7371	45.9735	68.4999	66.4805	72.5211	79.6284	146.973	159.832	75.3401	107.591	101.534	133.087	115.845	-0.6657	9.9531e-07	1.0826e-05	Mcm10	chr2	-	4989714	5012791	4867	protein_coding	minichromosome_maintenance_deficient_10_(S._cerevisiae)	87	68	54	68	55	76	100	160	145	77	92	106	111	116	0.8892	0.569976	0.446907	0.659484	0.64284	0.696459	0.785852	1.34914	1.43084	0.685923
ENSMUSG00000097666	877.154	841.322	889.672	910.646	965.78	1008.62	821.765	1484.43	1309.52	1445.16	1381.14	1440.63	1400.41	1631.81	-0.66406	1.0342e-35	9.91e-34	A330094K24Rik	chr18	-	77729681	77733470	1027	lincRNA	RIKEN_cDNA_A330094K24_gene	839	974	1045	904	799	1057	1032	1616	1188	1477	1181	1504	1168	1634	40.6381	38.6899	40.9855	41.5484	44.2566	45.9037	38.4336	64.5755	55.5559	62.3528
ENSMUSG00000100465	61.6831	52.6906	41.7167	42.3088	48.3494	32.4437	47.777	101.962	91.4899	68.491	77.1848	59.3877	74.3366	89.8795	-0.66388	4.9264e-07	5.6788e-06	RP23-408A1.2	chr5	-	149234816	149247682	1264	lincRNA	predicted_gene_29264	59	61	49	42	40	34	60	111	83	70	66	62	62	90	2.32192	1.96875	1.56147	1.56841	1.80017	1.19971	1.81554	3.6039	3.15366	2.40103
ENSMUSG00000086232	232.096	247.905	271.584	298.176	299.766	296.764	298.606	479.499	476.189	451.062	421.008	481.806	424.438	394.471	-0.66152	1.816e-21	8.3581e-20	Gm7546	chr7	-	65579998	65635913	966	antisense	predicted_gene_7546	222	287	319	296	248	311	375	522	432	461	360	503	354	395	11.4319	12.1203	13.3014	14.4634	14.6041	14.3591	14.8476	22.1764	21.4779	20.6904
ENSMUSG00000034837	164149	172014	167945	176359	178756	189100	159391	272805	286419	285254	284668	257140	260629	268613	-0.6578	2.7306e-64	6.3779e-62	Gnat1	chr9	-	107674477	107679592	2205	protein_coding	guanine_nucleotide_binding_protein_alpha_transducing_1	157009	199141	197267	175072	147887	198171	200168	296985	259840	291539	243417	268451	217376	268973	3542.07	3684.35	3603.55	3747.7	3815.25	4008.43	3472.07	5527.43	5659.55	5732.36
ENSMUSG00000026429	15.6821	10.3654	11.9191	6.04411	10.8786	14.3134	12.7405	37.6618	17.6366	28.3748	19.8809	22.9888	14.3877	24.9665	-0.65709	0.00016692	0.0011136	Ube2t	chr1	+	134962565	134974162	3244	protein_coding	ubiquitin-conjugating_enzyme_E2T_(putative)	15	12	14	6	9	15	16	41	16	29	17	24	12	25	0.230013	0.150907	0.173833	0.0873026	0.15782	0.206231	0.188643	0.518681	0.236877	0.387581
ENSMUSG00000034829	5703.07	5343.35	6000.39	6009.86	6299.93	6307.43	5545.32	9357.58	8902.08	9557.43	8802.58	9450.3	9158.99	10076.5	-0.65596	3.9292e-56	7.6481e-54	Nxnl1	chr8	-	71560556	71566649	2777	protein_coding	nucleoredoxin-like_1	5455	6186	7048	5966	5212	6610	6964	10187	8076	9768	7527	9866	7639	10090	97.7149	90.8747	102.229	101.406	106.765	106.162	95.9146	150.545	139.671	152.502
ENSMUSG00000037885	14720.3	15389.1	15063.1	15924.2	15400.5	14817.2	15369.9	25912.3	24760.7	23326.1	22687.7	24653.5	23995.1	23141	-0.65427	2.8755e-95	1.3433e-92	Stk35	chr2	+	129800517	129832287	5445	protein_coding	serine/threonine_kinase_35	14080	17816	17693	15808	12741	15528	19302	28209	22463	23840	19400	25738	20013	23172	128.631	133.482	130.884	137.036	133.109	127.192	135.583	212.612	198.132	189.825
ENSMUSG00000005705	77.3652	73.4213	65.5548	84.6175	64.063	77.2922	68.4804	130.438	175.264	102.736	100.574	119.733	92.3213	130.825	-0.64922	5.5029e-08	7.3816e-07	Agrp	chr8	-	105566700	105568298	659	protein_coding	agouti_related_protein	74	85	77	84	53	81	86	142	159	105	86	125	77	131	5.58583	5.2619	4.70641	6.01659	4.57501	5.48205	4.99132	8.84301	11.5877	6.90796
ENSMUSG00000083838	25.0914	19.0032	18.7299	15.1103	29.0097	15.2676	35.0365	32.1503	58.4213	28.3748	43.2703	51.7247	46.7601	34.9531	-0.64884	7.3682e-05	0.00054539	Gm11957	chr11	-	4129372	4130150	779	pseudogene	predicted_gene_11957	24	22	22	15	24	16	44	35	53	29	37	54	39	35	1.53255	1.15211	1.13755	0.908888	1.75257	0.916064	2.16032	1.84386	3.26755	1.61401
ENSMUSG00000047298	10500.8	10646.1	10363.6	10483.5	11380.2	11055.7	10781.7	16960.7	18153.6	17056.2	16694.1	16574.9	16212.6	16454.9	-0.64678	3.0641e-102	1.5067e-99	Kcnv2	chr19	+	27322588	27337179	5108	protein_coding	potassium_channel_subfamily_V_member_2	10044	12325	12173	10407	9415	11586	13540	18464	16469	17432	14275	17304	13522	16477	97.8132	98.4339	95.9912	96.1682	104.851	101.164	101.384	148.345	154.846	147.959
ENSMUSG00000022431	30.3188	15.548	27.2436	35.2573	19.3398	34.3521	21.4997	34.9061	41.887	51.8575	57.3039	52.6826	32.3724	60.9183	-0.64576	3.9241e-05	0.00030926	Ribc2	chr15	+	85132099	85144569	1652	protein_coding	RIB43A_domain_with_coiled-coils_2	29	18	32	35	16	36	27	38	38	53	49	55	27	61	0.873232	0.4445	0.780233	1.00003	0.550949	0.971932	0.625109	0.943997	1.10473	1.39095
ENSMUSG00000028294	144.276	145.979	149.84	120.882	158.344	117.37	151.294	252.61	251.322	229.934	198.809	216.478	215.816	219.705	-0.64569	8.7439e-15	2.5812e-13	1700003M02Rik	chr4	-	34688559	34730206	2246	protein_coding	RIKEN_cDNA_1700003M02_gene	138	169	176	120	131	123	190	275	228	235	170	226	180	220	3.05641	3.06963	3.15637	2.5219	3.3179	2.44252	3.23553	5.02481	4.87539	4.53632
ENSMUSG00000073633	103.502	93.2883	109.826	83.6102	109.995	102.102	88.3875	179.123	131.172	159.486	182.437	161.879	136.683	164.779	-0.64525	1.6989e-11	3.6365e-10	Fbxo36	chr1	+	84839841	84900487	1713	protein_coding	F-box_protein_36	99	108	129	83	91	107	111	195	119	163	156	169	114	165	2.87488	2.57203	3.03331	2.28706	3.02194	2.78593	2.47838	4.67169	3.33637	4.12549
ENSMUSG00000021255	8096.17	8116.94	5232.47	9576.89	8675.1	7005.92	8350.63	14135.1	15268.9	11181.6	12599.8	13380.4	10732.1	12888.7	-0.64494	1.3427e-09	2.2665e-08	Esrrb	chr12	+	86361117	86521628	4300	protein_coding	estrogen_related_receptor_beta	7744	9397	6146	9507	7177	7342	10487	15388	13852	11428	10774	13969	8951	12906	89.5857	89.1517	57.5716	104.359	94.9458	76.1534	93.2792	146.862	154.714	115.225
ENSMUSG00000051977	571.875	527.77	573.817	584.264	511.295	564.901	615.527	957.161	1059.3	804.28	806.932	825.68	912.422	893.802	-0.64254	8.2182e-25	4.7106e-23	Prdm9	chr17	-	15543079	15564354	3460	protein_coding	PR_domain_containing_9	547	611	674	580	423	592	773	1042	961	822	690	862	761	895	7.86417	7.204	7.84636	7.91241	6.9545	7.63113	8.54487	12.3592	13.3393	10.3001
ENSMUSG00000097243	90.9564	99.3348	103.866	100.735	91.8639	117.37	100.332	171.775	165.343	153.615	157.878	164.753	176.25	145.805	-0.64238	1.5016e-13	3.9913e-12	Gm26908	chr14	+	70205324	70217659	1637	lincRNA	predicted_gene_26908	87	115	122	100	76	123	126	187	150	157	135	172	147	146	2.6437	2.86588	3.0019	2.88342	2.64099	3.3512	2.94391	4.68803	4.40075	4.15812
ENSMUSG00000094092	18.8186	12.9567	17.0272	30.2205	21.7572	13.3592	11.9443	47.7662	41.887	34.2455	28.0672	37.3568	28.7755	19.9732	-0.64155	0.00014636	0.00099308	Gm15921	chr5	-	130208080	130208562	483	pseudogene	predicted_gene_15921	18	15	20	30	18	14	15	52	38	35	24	39	24	20	1.85382	1.26693	1.66789	2.93178	2.11996	1.29278	1.18781	4.41828	3.77851	3.14171
ENSMUSG00000018362	4308.41	4481.29	4124.84	4300.38	4617.37	4410.43	4072.99	7125.43	7676.34	6878.45	6671.81	6489.54	6512.85	6231.65	-0.64129	1.5829e-48	2.4855e-46	Kpna2	chr11	-	106988629	106999541	2054	protein_coding	karyopherin_(importin)_alpha_2	4121	5188	4845	4269	3820	4622	5115	7757	6964	7030	5705	6775	5432	6240	99.8031	103.041	95.0119	98.103	105.795	100.363	95.2461	154.985	162.833	148.389
ENSMUSG00000079010	6.27286	1.72756	2.55408	3.02205	1.20874	0.954225	6.37027	10.1044	9.9206	7.82754	5.84734	15.3258	11.9898	7.98929	-0.63998	0.00034882	0.0021266	Gm11032	chr11	+	4620067	4621698	102	protein_coding	predicted_gene_11032	6	2	3	3	1	1	8	11	9	8	5	16	10	8	2.92612	0.799906	1.18469	1.38828	0.557701	0.437263	2.9998	4.42578	4.23767	3.40044
ENSMUSG00000099447	163.094	119.202	204.327	222.625	134.17	126.912	127.405	203.006	349.425	303.317	258.452	256.708	227.806	235.684	-0.63994	2.8576e-07	3.4339e-06	RP23-53N22.1	chr1	-	150320681	150346771	610	antisense	RIKEN_cDNA_2310030A07_gene	156	138	240	221	111	133	160	221	317	310	221	268	190	236	12.7214	9.22907	15.8477	17.1009	10.3513	9.72445	10.0321	14.8682	24.9582	22.0332
ENSMUSG00000090307	139.048	177.939	157.502	189.382	137.796	162.218	163.238	231.482	329.584	250.481	279.503	259.582	211.02	255.657	-0.63846	3.1013e-12	7.19e-11	1700071M16Rik	chr17	-	43588340	43592442	2504	antisense	RIKEN_cDNA_1700071M16_gene	133	206	185	188	114	170	205	252	299	256	239	271	176	256	2.64216	3.35615	2.97592	3.54389	2.58983	3.02801	3.13128	4.13013	5.73484	4.43253
ENSMUSG00000058588	9.40928	7.77402	1.70272	2.0147	9.66988	7.6338	9.55541	13.7787	20.9435	12.7198	15.2031	12.4523	21.5816	13.9813	-0.63678	0.00045307	0.0026715	Vmn1r21	chr6	-	57843464	57844498	1035	protein_coding	vomeronasal_1_receptor_21	9	9	2	2	8	8	12	15	19	13	13	13	18	14	0.432558	0.354741	0.0778349	0.0912108	0.439694	0.344741	0.443448	0.594768	0.881653	0.544564
ENSMUSG00000035517	5575.52	5533.38	5221.4	5594.83	5549.31	5959.14	5409.16	8526.27	8821.61	8499.73	8458.76	8358.33	9413.17	8541.55	-0.6366	4.4763e-80	1.4936e-77	Tdrd7	chr4	+	45965334	46034761	3716	protein_coding	tudor_domain_containing_7	5333	6406	6133	5554	4591	6245	6793	9282	8003	8687	7233	8726	7851	8553	71.39	70.3267	66.4786	70.5483	70.2802	74.9549	69.9178	102.509	103.434	101.354
ENSMUSG00000085218	166.231	150.298	137.92	134.985	132.961	127.866	119.443	281.086	239.197	210.365	175.42	215.52	194.234	241.676	-0.63651	4.5425e-11	9.1763e-10	BB218582	chr2	-	106642914	106650364	1024	processed_transcript	expressed_sequence_BB218582	159	174	162	134	110	134	150	306	217	215	150	225	162	242	7.72394	6.93199	6.37235	6.17677	6.11074	5.83644	5.60265	12.2636	10.1776	9.10299
ENSMUSG00000086942	39.7281	41.4615	43.4194	61.4484	45.932	40.0775	46.9808	76.2422	104.717	56.7497	77.1848	67.0506	64.7448	91.8768	-0.63627	1.5904e-06	1.664e-05	Gm15489	chr7	-	122139008	122159401	973	antisense	predicted_gene_15489	38	48	51	61	38	42	59	83	95	58	66	70	54	92	1.94273	2.01251	2.11126	2.9592	2.22163	1.92522	2.31922	3.50076	4.68916	2.58441
ENSMUSG00000059060	5.22738	9.50158	3.40544	2.0147	2.41747	2.86268	6.37027	9.18581	12.1252	7.82754	23.3893	17.2416	11.9898	7.98929	-0.63626	0.00043894	0.0026014	Rad51b	chr12	+	79297351	79508656	1759	protein_coding	RAD51_homolog_B	5	11	4	2	2	3	8	10	11	8	20	18	10	8	0.141399	0.255115	0.0915965	0.0536687	0.0646793	0.0760674	0.173951	0.233309	0.300339	0.197183
ENSMUSG00000014164	683.741	702.254	624.899	691.043	699.858	686.088	717.452	1143.63	1102.29	988.227	1005.74	1167.64	1003.54	1108.51	-0.63554	5.3033e-38	5.5673e-36	Klhl3	chr13	-	58004221	58113592	3156	protein_coding	kelch-like_3	654	813	734	686	579	719	901	1245	1000	1010	860	1219	837	1110	10.3082	10.509	9.36793	10.2599	10.4362	10.161	10.9192	16.1893	15.2176	13.8749
ENSMUSG00000021221	2235.23	2193.14	2165.01	2325.97	2209.57	2270.1	2405.57	3569.61	3628.73	3377.58	3532.96	3552.72	3327.16	3654.1	-0.63537	1.9669e-82	7.068e-80	Dpf3	chr12	-	83213745	83487716	3135	protein_coding	D4_zinc_and_double_PHD_fingers_family_3	2138	2539	2543	2309	1828	2379	3021	3886	3292	3452	3021	3709	2775	3659	33.9244	33.0395	32.6733	34.7651	33.1696	33.8454	36.8566	50.8701	50.4321	47.7396
ENSMUSG00000101348	3.13643	3.45512	0	2.0147	1.20874	1.90845	3.98142	6.43007	15.432	3.91377	4.67787	7.66292	8.39284	15.9786	-0.63526	0.00023965	0.0015211	RP23-282G20.2	chr1	+	97346475	97573015	1905	pseudogene	predicted_gene_7135	3	4	0	2	1	2	5	7	14	4	4	8	7	16	0.0783372	0.0856592	0	0.0495555	0.0298611	0.0468251	0.100387	0.1508	0.352954	0.0910355
ENSMUSG00000096010	5.22738	6.04646	8.51361	15.1103	9.66988	14.3134	3.98142	16.5345	12.1252	19.5689	28.0672	39.2725	22.7806	9.98661	-0.63433	0.00048759	0.0028544	Hist4h4	chr6	-	136801553	136804431	2879	protein_coding	histone_cluster_4_H4	5	7	10	15	8	15	5	18	11	20	24	41	19	10	0.0863913	0.0991894	0.139908	0.245927	0.15807	0.232377	0.0664248	0.256583	0.1835	0.301186
ENSMUSG00000092384	8.36381	14.6843	10.2163	18.1323	7.25241	12.4049	15.9257	25.7203	23.1481	21.5257	23.3893	17.2416	38.3673	22.9692	-0.63287	0.00023691	0.0015057	Gm4189	chr10	-	127289696	127290788	418	processed_transcript	predicted_gene_4189	8	17	12	18	6	13	20	28	21	22	20	18	32	23	0.952041	1.65913	1.15635	2.0326	0.816538	1.38711	1.83002	2.74903	2.41283	2.28188
ENSMUSG00000038515	1602.71	1613.54	1557.14	1758.84	1734.54	1656.53	1600.53	2714.41	2541.88	2549.82	2465.24	2597.73	2484.28	2557.57	-0.63238	4.2973e-72	1.2746e-69	Grtp1	chr8	-	13176869	13200624	1310	protein_coding	GH_regulated_TBC_protein_1	1533	1868	1829	1746	1435	1736	2010	2955	2306	2606	2108	2712	2072	2561	58.212	58.1721	56.2376	62.9114	62.3135	59.1047	58.685	92.5728	84.542	86.248
ENSMUSG00000054057	486.146	528.634	547.425	543.97	514.921	579.215	539.084	818.456	821.205	710.349	823.305	862.079	888.443	941.737	-0.63122	4.8543e-28	3.2865e-26	A930004D18Rik	chr2	-	18025193	18037737	3217	protein_coding	RIKEN_cDNA_A930004D18_gene	465	612	643	540	426	607	677	891	745	726	704	900	741	943	7.19024	7.76085	8.0509	7.92318	7.53286	8.41552	8.04896	11.3664	11.1222	9.78433
ENSMUSG00000035181	1940.4	2219.92	2091.79	1989.52	2179.35	2261.51	1913.47	3276.58	3197.74	3018.5	3472.15	3383.18	3264.82	3134.8	-0.63068	2.3818e-46	3.477e-44	Heatr5a	chr12	-	51875873	51971321	7761	protein_coding	HEAT_repeat_containing_5A	1856	2570	2457	1975	1803	2370	2403	3567	2901	3085	2969	3532	2723	3139	11.896	13.509	12.7518	12.0117	13.2154	13.6199	11.8424	18.8618	17.9521	17.2339
ENSMUSG00000049811	5444.84	5348.53	4741.23	5592.81	4940.1	5139.46	5851.89	8670.49	9921.7	7363.76	7533.71	8135.15	7786.16	8672.37	-0.63035	3.8574e-26	2.4269e-24	Fam161a	chr11	+	23007531	23030788	2597	protein_coding	family_with_sequence_similarity_161_member_A	5208	6192	5569	5552	4087	5386	7349	9439	9001	7526	6442	8493	6494	8684	99.7564	97.2675	86.3753	100.91	89.5229	92.4991	108.233	149.16	166.457	125.643
ENSMUSG00000101641	12.5457	7.77402	22.1354	24.1764	24.1747	21.9472	11.148	32.1503	29.7618	38.1593	26.8977	23.9466	35.9693	46.9371	-0.6298	0.0002136	0.0013811	RP23-179B10.2	chr3	-	104667032	104670010	881	protein_coding	predicted_gene_29560	12	9	26	24	20	23	14	35	27	39	23	25	30	47	0.677559	0.41675	1.18873	1.28585	1.29138	1.16438	0.607791	1.63038	1.47188	1.91926
ENSMUSG00000032420	3090.43	3278.91	2832.48	3358.51	3152.38	3218.6	3263.97	5040.25	5264.53	5262.06	4749.21	4845.84	4492.57	4884.45	-0.62936	4.3706e-49	6.9802e-47	Nt5e	chr9	+	88327197	88372092	3995	protein_coding	5'_nucleotidase_ecto	2956	3796	3327	3334	2608	3373	4099	5487	4776	5378	4061	5059	3747	4891	36.8069	38.7631	33.5444	39.3918	37.1357	37.6568	39.2431	56.3657	57.4159	58.3646
ENSMUSG00000006007	33053.8	36323.7	23210.7	30478.4	27292	30254.7	30472.2	56005.9	56433.9	42439	43693.6	45735.2	42389.9	50383.4	-0.62583	4.0654e-11	8.2481e-10	Pdc	chr1	+	150319417	150333906	3335	protein_coding	phosducin	31616	42052	27263	30256	22579	31706	38268	60970	51197	43374	37362	47747	35355	50451	471.577	514.398	329.278	428.225	385.133	424.023	438.876	750.27	737.281	563.87
ENSMUSG00000029177	37.6371	45.7804	53.6357	32.2352	48.3494	52.4824	54.9436	78.0794	68.3419	68.491	77.1848	85.25	89.9233	71.9036	-0.62536	3.6767e-07	4.3483e-06	Cenpa	chr5	+	30666777	30674827	1354	protein_coding	centromere_protein_A	36	53	63	32	40	55	69	85	62	70	66	89	75	72	1.32259	1.59686	1.87416	1.11555	1.68052	1.8117	1.94909	2.5763	2.19916	2.24143
ENSMUSG00000089917	3779.4	3655.52	3894.13	4113.02	3778.51	3718.62	3857.2	6461.3	6156.28	5680.84	5650.87	6245.28	5775.48	5553.55	-0.62471	4.6722e-57	9.3876e-55	Uckl1	chr2	-	181569149	181584892	1849	protein_coding	uridine-cytidine_kinase_1-like_1	3615	4232	4574	4083	3126	3897	4844	7034	5585	5806	4832	6520	4817	5561	97.2553	93.3722	99.6423	104.232	96.1731	94.0019	100.2	156.121	145.068	136.14
ENSMUSG00000085105	48.0919	44.9166	45.9735	53.3896	47.1407	49.6197	38.2216	103.8	121.252	67.5125	58.4734	47.8933	64.7448	99.8661	-0.62135	2.8926e-05	0.00023532	Gm12758	chr7	+	34234377	34240207	4175	processed_transcript	predicted_gene_12758	46	52	54	53	39	52	48	113	110	69	50	50	54	100	0.548079	0.508108	0.520981	0.599206	0.531385	0.555508	0.439731	1.11076	1.26538	0.716537
ENSMUSG00000028125	22025	21286.1	22198.4	24487.7	22320.5	23291.7	23348.6	34685.6	39330.8	32783.7	35377.6	35878.8	34106.1	33611.9	-0.62088	1.1786e-53	2.1177e-51	Abca4	chr3	+	122044443	122180061	7265	protein_coding	ATP-binding_cassette_sub-family_A_(ABC1)_member_4	21067	24643	26074	24309	18466	24409	29322	37760	35681	33506	30251	37457	28446	33657	144.248	138.378	144.563	157.939	144.59	149.85	154.369	213.301	235.877	199.955
ENSMUSG00000044055	14.6367	6.91024	15.3245	14.1029	13.2961	11.4507	21.4997	25.7203	18.7389	26.4179	26.8977	28.736	31.1734	24.9665	-0.62074	0.00022231	0.001425	Otos	chr1	-	92644218	92648841	2990	protein_coding	otospiralin	14	8	18	14	11	12	27	28	17	27	23	30	26	25	0.232916	0.109151	0.242486	0.221011	0.209278	0.179	0.345378	0.384312	0.273063	0.391506
ENSMUSG00000040728	34.5007	39.7339	29.7976	17.125	30.2184	31.4894	46.1845	66.1378	62.8304	56.7497	42.1008	49.809	52.755	63.9143	-0.6201	2.0473e-05	0.00017217	Esrp1	chr4	-	11331933	11386783	3864	protein_coding	epithelial_splicing_regulatory_protein_1	33	46	35	17	25	33	58	72	57	58	36	52	44	64	0.424833	0.485657	0.364851	0.207667	0.368048	0.380908	0.574107	0.764702	0.708471	0.650784
ENSMUSG00000087292	72.1378	49.2355	63.8521	66.4852	61.6455	65.8415	109.091	136.869	138.888	106.65	83.0322	113.986	87.5254	152.795	-0.61439	9.4559e-06	8.5857e-05	Gm13832	chr5	+	115359078	115422863	414	antisense	predicted_gene_13832	69	57	75	66	51	69	137	149	126	109	71	119	73	153	8.29069	5.61673	7.29702	7.52489	7.00763	7.43348	12.6568	14.7701	14.6169	11.4149
ENSMUSG00000067220	13617.3	14119.4	12497.1	12891.1	12529.8	13748.5	12374.3	20839.8	22322.4	20077.6	19486.8	19460	19298.7	19621.7	-0.61291	1.9353e-52	3.3176e-50	Cnga1	chr5	-	72603696	72642752	2739	protein_coding	cyclic_nucleotide_gated_channel_alpha_1	13025	16346	14679	12797	10366	14408	15540	22687	20251	20520	16663	20316	16096	19648	236.552	243.46	215.868	220.533	215.288	234.615	217.001	339.924	355.09	324.811
ENSMUSG00000092276	1.04548	5.18268	4.25681	2.0147	2.41747	5.72535	1.59257	6.43007	13.2275	4.89221	7.0168	10.5365	15.5867	9.98661	-0.61266	0.00060149	0.0034162	1700116B05Rik	chr16	+	50783409	50784091	414	lincRNA	RIKEN_cDNA_1700116B05_gene	1	6	5	2	2	6	2	7	12	5	6	11	13	10	0.120155	0.591235	0.486468	0.228027	0.274809	0.646389	0.18477	0.693897	1.39208	0.523619
ENSMUSG00000010492	1314.16	1138.46	1288.11	1269.26	1325.98	1416.07	1252.55	2024.55	1986.32	2071.36	1846.59	2036.42	1919.56	1933.41	-0.61056	1.6945e-44	2.278e-42	Uckl1os	chr2	+	181578480	181585170	2018	antisense	uridine-cytidine_kinase_1-like_1_opposite_strand	1257	1318	1513	1260	1097	1484	1573	2204	1802	2117	1579	2126	1601	1936	30.9853	26.6442	30.1997	29.4718	30.9234	32.7987	29.8133	44.8216	42.8863	45.4826
ENSMUSG00000039496	74.2288	72.5576	74.0684	88.6469	66.4805	81.1091	96.3504	135.031	110.229	96.8658	136.828	107.281	137.882	170.771	-0.60759	1.8179e-07	2.2662e-06	Cdnf	chr2	+	3513030	3526376	3013	protein_coding	cerebral_dopamine_neurotrophic_factor	71	84	87	88	55	85	121	147	100	99	117	112	115	171	1.1722	1.13734	1.16307	1.37861	1.0384	1.25824	1.53599	2.00224	1.59399	1.42456
ENSMUSG00000010342	17.7731	25.0496	17.8786	29.2132	36.2621	31.4894	28.6662	45.929	39.6824	66.5341	39.7619	30.6517	45.5612	53.9277	-0.60563	0.00010195	0.00072742	Tex14	chr11	+	87405065	87555823	4763	protein_coding	testis_expressed_gene_14	17	29	21	29	30	33	36	50	36	68	34	32	38	54	0.177546	0.248386	0.177592	0.287392	0.358296	0.309013	0.289084	0.430811	0.363	0.618976
ENSMUSG00000097456	77.3652	58.7371	59.5953	55.4043	68.8979	58.2077	66.0916	92.7767	94.7968	108.607	99.4047	88.1236	85.1274	144.806	-0.60516	3.8274e-07	4.5066e-06	Gm16958	chr3	+	127161305	127168288	1764	lincRNA	predicted_gene_16958	74	68	70	55	57	61	83	101	86	111	85	92	71	145	2.08677	1.5726	1.59839	1.4717	1.83814	1.54232	1.79962	2.34974	2.34145	2.72816
ENSMUSG00000089964	79.4562	51.8268	46.8249	62.4558	72.5241	78.2465	69.2767	119.416	90.3877	90.9952	76.0154	112.07	116.301	144.806	-0.60498	3.3003e-06	3.2646e-05	Gm16582	chr1	+	74850895	74879953	1930	processed_transcript	predicted_gene_16582	76	60	55	62	60	82	87	130	82	93	65	117	97	145	1.95884	1.26824	1.14786	1.51632	1.76846	1.89496	1.72411	2.76429	2.04052	2.08916
ENSMUSG00000026870	100.366	74.2851	108.974	87.6396	62.8543	81.1091	80.4247	137.787	158.73	117.413	116.947	160.921	134.286	124.833	-0.60249	4.6791e-08	6.3634e-07	Cutal	chr2	+	34874396	34892133	2312	protein_coding	cutA_divalent_cation_tolerance_homolog-like	96	86	128	87	52	85	101	150	144	120	100	168	112	125	2.0655	1.51747	2.23001	1.77618	1.27943	1.63974	1.67084	2.66257	2.99129	2.25029
ENSMUSG00000053111	20.9095	20.7307	28.9463	25.1838	25.3834	25.7641	23.0922	33.0689	31.9664	40.1161	45.6092	43.1039	40.7652	52.929	-0.60149	4.2386e-05	0.00033181	Fank1	chr7	+	133776861	133881532	2004	protein_coding	fibronectin_type_3_and_ankyrin_repeat_domains_1	20	24	34	25	21	27	29	36	29	41	39	45	34	53	0.496448	0.488565	0.683385	0.588842	0.596105	0.60091	0.553481	0.737228	0.695	0.887017
ENSMUSG00000037148	1041.29	875.01	1145.93	1187.67	1060.06	1104.99	971.466	1701.21	1611.55	1620.3	1613.86	1709.79	1627.01	1426.09	-0.59904	2.2951e-24	1.2614e-22	Arhgap10	chr8	-	77250366	77517907	3038	protein_coding	Rho_GTPase_activating_protein_10	996	1013	1346	1179	877	1158	1220	1852	1462	1656	1380	1785	1357	1428	16.3085	13.6029	17.846	18.3182	16.4215	17.0006	15.3594	25.0179	23.1123	23.633
ENSMUSG00000032578	88.8655	94.1521	68.9602	92.6763	106.369	97.331	98.7392	172.693	134.479	154.594	145.014	136.975	142.678	124.833	-0.59804	1.6864e-09	2.8061e-08	Cish	chr9	+	107296026	107302784	4697	protein_coding	cytokine_inducible_SH2-containing_protein	85	109	81	92	88	102	124	188	122	158	124	143	119	125	0.900202	0.946705	0.694623	0.924536	1.06577	0.968552	1.00973	1.64261	1.24745	1.45842
ENSMUSG00000038570	204.913	209.899	256.26	255.867	176.475	249.053	254.015	380.293	356.039	321.908	336.807	346.747	338.112	416.442	-0.59789	2.6482e-13	6.8728e-12	Fam154b	chr7	-	82632960	82648528	2783	protein_coding	family_with_sequence_similarity_154_member_B	196	243	301	254	146	261	319	414	323	329	288	362	282	417	3.50336	3.56207	4.3565	4.30801	2.98429	4.18283	4.38409	6.10498	5.57409	5.12541
ENSMUSG00000074862	106.639	98.471	84.2847	88.6469	89.4464	72.5211	96.3504	185.553	135.581	122.305	128.641	151.343	142.678	133.821	-0.59649	9.6339e-09	1.4276e-07	BC025920	chr10	+	81606270	81620703	2785	protein_coding	cDNA_sequence_BC025920	102	114	99	88	74	76	121	202	123	125	110	158	119	134	1.82187	1.66989	1.43184	1.49147	1.5115	1.21712	1.66174	2.97662	2.12112	1.94594
ENSMUSG00000046157	3045.47	2760.64	2806.09	2792.38	2851.41	2687.1	2774.25	4262.22	4542.53	4687.72	4026.48	4110.2	3939.84	4364.15	-0.59506	6.4163e-47	9.6689e-45	Tmem229b	chr12	-	78961795	79007627	3860	protein_coding	transmembrane_protein_229B	2913	3196	3296	2772	2359	2816	3484	4640	4121	4791	3443	4291	3286	4370	37.5401	33.7776	34.3941	33.8971	34.765	32.5378	34.5218	49.3319	51.2743	53.8127
ENSMUSG00000026819	2646.1	2630.21	2660.5	2742.01	2741.41	2612.67	2617.39	4183.22	4125.87	4094.78	3931.75	4143.73	3918.26	3813.89	-0.59428	1.7928e-92	7.9761e-90	Slc25a25	chr2	-	32414487	32451445	3529	protein_coding	solute_carrier_family_25_(mitochondrial_carrier_phosphate_carrier)_member_25	2531	3045	3125	2722	2268	2738	3287	4554	3743	4185	3362	4326	3268	3819	35.6765	35.2001	35.6683	36.4077	36.5589	34.6039	35.6246	52.9588	50.9393	51.415
ENSMUSG00000022836	3139.56	3314.33	2984.02	3519.69	3094.36	3357.92	3781.55	5215.7	5721.98	4579.11	4687.22	4903.31	4695.2	5545.56	-0.59209	1.1899e-24	6.727e-23	Mylk	chr16	+	34745210	35002420	7824	protein_coding	myosin_light_polypeptide_kinase	3003	3837	3505	3494	2560	3519	4749	5678	5191	4680	4008	5119	3916	5553	19.0927	20.0065	18.0445	21.079	18.6128	20.0601	23.2154	29.7827	31.8645	25.9336
ENSMUSG00000054822	6.27286	20.7307	11.0677	8.05881	7.25241	10.4965	9.55541	25.7203	20.9435	18.5904	16.3725	15.3258	26.3775	21.9705	-0.59131	0.00082195	0.0044909	1700041G16Rik	chr8	+	22805766	22809537	1824	antisense	RIKEN_cDNA_1700041G16_gene	6	24	13	8	6	11	12	28	19	19	14	16	22	22	0.163632	0.536779	0.28708	0.207025	0.187123	0.268975	0.251628	0.629985	0.50028	0.451621
ENSMUSG00000040543	10044.9	9530.09	8676.22	9921.4	9093.32	8995.48	10958.5	16109.2	16647.9	12691.4	13767	15146.7	13320.6	14729.3	-0.59061	4.328e-23	2.1624e-21	Pitpnm3	chr11	-	72047528	72135778	6555	protein_coding	PITPNM_family_member_3	9608	11033	10191	9849	7523	9427	13762	17537	15103	12971	11772	15813	11110	14749	72.9125	68.6641	62.6222	70.9212	65.2859	64.1422	80.2991	109.794	110.656	85.7919
ENSMUSG00000071653	99.3202	65.6473	80.8793	90.6616	76.1503	92.5598	83.6098	142.38	133.377	106.65	125.133	136.017	128.291	145.805	-0.58958	5.6438e-09	8.687e-08	1810009A15Rik	chr19	+	8888853	8890881	830	protein_coding	RIKEN_cDNA_1810009A15_gene	95	76	95	90	63	97	105	155	121	109	107	142	107	146	5.6936	3.73546	4.61031	5.11824	4.31781	5.21239	4.83853	7.66391	7.00151	5.69369
ENSMUSG00000047034	3456.34	3511.27	3353.51	3617.4	3832.9	3585.98	3336.43	5717.25	5336.18	5497.87	5242.72	5078.6	5185.58	5191.04	-0.58816	8.791e-59	1.8457e-56	Ankrd33	chr15	+	101115755	101120022	1442	protein_coding	ankyrin_repeat_domain_33	3306	4065	3939	3591	3171	3758	4190	6224	4841	5619	4483	5302	4325	5198	114.046	115.002	110.029	117.546	125.093	116.234	111.135	177.134	161.233	168.943
ENSMUSG00000096967	46.0009	36.2788	34.0544	54.397	56.8106	46.757	54.9436	80.8351	84.8762	66.5341	67.8291	99.618	62.3468	66.9103	-0.58798	7.6973e-06	7.1063e-05	Gm26621	chr15	-	68335136	68337410	700	processed_transcript	predicted_gene_26621	44	42	40	54	47	49	69	88	77	68	58	104	52	67	3.12677	2.44771	2.30169	3.64127	3.81945	3.12206	3.7701	5.15919	5.28296	4.21169
ENSMUSG00000054910	132.775	139.932	112.38	94.691	113.621	135.5	114.665	200.251	182.98	175.141	161.386	189.657	182.245	212.715	-0.58784	9.5525e-11	1.8516e-09	4931415C17Rik	chr8	+	12672186	12679229	2255	processed_transcript	RIKEN_cDNA_4931415C17_gene	127	162	132	94	94	142	144	218	166	179	138	198	152	213	2.80155	2.93074	2.35783	1.96761	2.37128	2.80857	2.44241	3.96741	3.53546	3.44154
ENSMUSG00000033066	3016.2	2788.28	2896.33	3194.31	2799.43	2793.97	3271.13	4487.27	4669.29	4266.99	4056.88	4432.04	4342.7	5205.02	-0.58714	1.6956e-29	1.214e-27	Gas7	chr11	+	67455437	67688990	7067	protein_coding	growth_arrest_specific_7	2885	3228	3402	3171	2316	2928	4108	4885	4236	4361	3469	4627	3622	5212	20.3073	18.6341	19.3903	21.1796	18.6425	18.479	22.233	28.3679	28.7876	26.7545
ENSMUSG00000031293	36712.9	40558.8	33973.6	34559.2	35025.5	37998.2	33561.8	54879.7	60809.9	53656.8	53271.6	52040.8	51215.5	55731.3	-0.58694	4.9959e-38	5.2742e-36	Rs1	chrX	+	160768013	160799663	5840	protein_coding	retinoschisis_(X-linked_juvenile)_1_(human)	35116	46955	39905	34307	28977	39821	42148	59744	55167	54839	45552	54330	42716	55806	299.112	328.003	275.232	277.285	282.255	304.118	276.036	419.835	453.681	407.12
ENSMUSG00000090151	5.22738	1.72756	2.55408	1.00735	3.62621	0.954225	3.98142	9.18581	15.432	4.89221	5.84734	6.70506	7.19387	8.98795	-0.5867	0.0008892	0.0048119	Gm16043	chr6	-	8420009	8443455	616	antisense	predicted_gene_16043	5	2	3	1	3	1	5	10	14	5	5	7	6	9	0.403767	0.132452	0.196167	0.076626	0.27704	0.072404	0.31045	0.666218	1.09152	0.351913
ENSMUSG00000025450	78.4107	112.291	97.9065	101.742	93.0726	79.2007	113.869	150.647	159.832	119.37	152.031	150.385	184.643	145.805	-0.58533	1.2844e-08	1.8735e-07	Gm9752	chr13	-	119473804	119476761	2659	processed_transcript	predicted_gene_9752	75	130	115	101	77	83	143	164	145	122	130	157	154	146	1.40309	1.9945	1.74206	1.79291	1.6473	1.3922	2.05693	2.53118	2.61899	1.98924
ENSMUSG00000086643	7.31833	11.2291	2.55408	8.05881	6.04368	2.86268	4.7777	23.8831	8.81831	3.91377	11.6947	22.9888	17.9847	17.9759	-0.58457	0.0012343	0.0063571	Gm15687	chr6	+	145056389	145059892	269	antisense	predicted_gene_15687	7	13	3	8	5	3	6	26	8	4	10	24	15	18	1.29446	1.97151	0.449214	1.40376	1.05735	0.497407	0.853102	3.9666	1.42831	0.644694
ENSMUSG00000044768	1937.27	2117.99	2171.82	2094.28	2042.76	2116.47	2114.93	3170.94	3077.59	3097.75	3147.04	3208.85	3050.2	3180.74	-0.58283	3.7897e-86	1.4753e-83	D1Ertd622e	chr1	-	97606318	97662074	40378	protein_coding	DNA_segment_Chr_1_ERATO_Doi_622_expressed	1853	2452	2551	2079	1690	2218	2656	3452	2792	3166	2691	3350	2544	3185	2.28282	2.47733	2.54478	2.43034	2.38091	2.44997	2.51585	3.50851	3.32089	3.39947
ENSMUSG00000100876	94.0928	53.5544	53.6357	72.5293	60.4368	69.6584	49.3696	136.869	97.0014	87.0814	85.3711	101.534	97.1172	115.845	-0.58116	6.3652e-06	5.9769e-05	RP23-45G16.6	chr6	+	134897961	134901108	3148	antisense	RIKEN_cDNA_2810454H06_gene	90	62	63	72	50	73	62	149	88	89	73	106	81	116	1.42216	0.803463	0.806103	1.07958	0.903518	1.03426	0.753284	1.94244	1.34256	1.22575
ENSMUSG00000024575	38510.1	41267.1	37975	41454.5	39758.9	45500.3	39500.5	61146.3	62152.5	60264.2	60814.6	60466.2	59248.7	62323.4	-0.58095	1.4393e-60	3.1272e-58	Pde6a	chr18	+	61220482	61289924	4421	protein_coding	phosphodiesterase_6A_cGMP-specific_rod_alpha	36835	47775	44605	41152	32893	47683	49606	66566	56385	61592	52002	63126	49416	62407	414.459	440.848	406.394	439.367	423.238	481.046	429.157	617.915	612.53	604.018
ENSMUSG00000046991	135.912	85.5143	78.3252	107.787	74.9416	56.2993	101.924	191.983	190.696	150.68	112.269	137.933	116.301	138.814	-0.5805	2.2183e-05	0.00018464	Wdr27	chr17	-	14829331	14934653	2574	protein_coding	WD_repeat_domain_27	130	99	92	107	62	59	128	209	173	154	96	144	97	139	2.51233	1.56905	1.43967	1.96215	1.3702	1.02232	1.90197	3.33223	3.22791	2.59393
ENSMUSG00000051169	188.186	169.301	212.84	181.323	178.893	211.838	220.571	295.783	284.39	288.641	333.298	300.77	311.734	269.638	-0.58026	4.7025e-15	1.4242e-13	Rpusd3	chr6	-	113415319	113419348	1277	protein_coding	RNA_pseudouridylate_synthase_domain_containing_3	180	196	250	180	148	222	277	322	258	295	285	314	260	270	7.0117	6.26144	7.88558	6.65332	6.59283	7.75364	8.29642	10.3481	9.70316	10.0156
ENSMUSG00000038070	921.064	951.886	653.845	674.925	678.101	744.296	842.468	1263.05	1442.9	1021.49	1143.74	1152.31	1029.92	1334.21	-0.57929	3.1773e-11	6.5531e-10	Cntln	chr4	+	84884309	85131921	5528	protein_coding	centlein_centrosomal_protein	881	1102	768	670	561	780	1058	1375	1309	1044	978	1203	859	1336	7.92774	8.13247	5.596	5.72089	5.77293	6.29318	7.32015	10.2078	11.3725	8.18801
ENSMUSG00000084809	5.22738	1.72756	2.55408	3.02205	3.62621	2.86268	3.18514	10.1044	6.61373	9.78443	8.18627	7.66292	9.59182	5.99197	-0.57882	0.0012918	0.0066151	Gm12631	chr4	+	88033501	88034998	637	antisense	predicted_gene_12631	5	2	3	3	3	3	4	11	6	10	7	8	8	6	0.390456	0.128085	0.1897	0.222299	0.267906	0.210051	0.240172	0.70868	0.452373	0.680622
ENSMUSG00000092174	141.139	117.474	160.907	139.014	119.665	144.088	139.35	241.587	220.458	210.365	190.623	219.351	170.255	220.704	-0.57836	4.772e-11	9.5984e-10	Gm7029	chr17	+	33866879	33874116	450	pseudogene	predicted_gene_7029	135	136	189	138	99	151	175	263	200	215	163	229	142	221	14.9232	12.3292	16.9174	14.4752	12.5148	14.9661	14.874	23.985	21.3453	20.7144
ENSMUSG00000079484	75.2743	76.0127	74.9198	73.5366	60.4368	57.2535	71.6656	125.846	126.763	88.0598	129.811	104.407	81.5305	112.849	-0.57828	3.8895e-07	4.5739e-06	Phyhd1	chr2	+	30266203	30282149	1678	protein_coding	phytanoyl-CoA_dioxygenase_domain_containing_1	72	88	88	73	50	60	90	137	115	90	111	109	68	113	2.13443	2.13944	2.1124	2.05347	1.69504	1.59479	2.05141	3.35062	3.29147	2.32539
ENSMUSG00000025645	317.825	303.187	286.909	253.853	297.349	282.451	326.476	528.184	486.109	425.622	361.365	458.818	377.678	517.306	-0.57822	2.078e-12	4.9026e-11	Ccdc51	chr9	+	109082496	109093363	2397	protein_coding	coiled-coil_domain_containing_51	304	351	337	252	246	296	410	575	441	435	309	479	315	518	6.30881	5.97376	5.663	4.96237	5.83806	5.50766	6.54211	9.84457	8.83599	7.86805
ENSMUSG00000023979	18809.2	18656.8	21347.9	22714.8	22298.8	22153.3	19376	32436.9	27452.5	31995.1	30270.5	32007.1	32343.6	31863.3	-0.57555	1.1763e-29	8.553e-28	Guca1b	chr17	+	47385393	47392967	1668	protein_coding	guanylate_cyclase_activator_1B	17991	21599	25075	22549	18448	23216	24333	35312	24905	32700	25884	33415	26976	31906	536.539	528.258	605.521	638.099	629.151	620.776	557.958	868.807	717.092	849.958
ENSMUSG00000035394	30.3188	31.9599	23.8381	19.1397	20.5485	28.6268	22.296	58.7892	38.5801	31.3102	45.6092	45.0197	37.1683	37.9491	-0.57364	0.00014313	0.00097413	Ccdc11	chr18	+	74283090	74359986	2086	protein_coding	cilia_and_flagella_associated_protein_53	29	37	28	19	17	30	28	64	35	32	39	47	31	38	0.691553	0.723596	0.540665	0.429928	0.463592	0.641432	0.513388	1.25911	0.80582	0.665092
ENSMUSG00000035211	79.4562	75.1489	83.4334	102.75	58.0193	61.0704	95.5541	125.846	119.047	121.327	93.5574	150.385	119.898	143.807	-0.57333	1.1623e-06	1.2503e-05	Xrra1	chr7	+	99859218	99917824	2631	protein_coding	X-ray_radiation_resistance_associated_1	76	87	98	102	48	64	120	137	108	124	80	157	100	144	1.43693	1.34899	1.50034	1.82994	1.03782	1.08493	1.74447	2.13696	1.97146	2.04337
ENSMUSG00000097564	0	5.18268	3.40544	4.02941	0	5.72535	0	6.43007	12.1252	16.6335	10.5252	15.3258	10.7908	1.99732	-0.57264	0.00065886	0.0037016	C430014B12Rik	chr1	-	82691928	82725169	3377	lincRNA	RIKEN_cDNA_C430014B12_gene	0	6	4	4	0	6	0	7	11	17	9	16	9	2	0	0.0724818	0.0477104	0.0559095	0	0.0792435	0	0.0850676	0.156439	0.218255
ENSMUSG00000085521	57.5012	61.3284	59.5953	68.4999	54.3931	67.75	98.7392	103.8	122.354	82.1892	98.2352	112.07	124.694	100.865	-0.57241	2.7137e-06	2.7233e-05	4930526A20Rik	chr17	-	28075050	28076677	1628	pseudogene	RIKEN_cDNA_4930526A20_gene	55	71	70	68	45	71	124	113	111	84	84	117	104	101	1.68054	1.77915	1.73192	1.97157	1.57239	1.94512	2.91319	2.84853	3.27456	2.23702
ENSMUSG00000074300	8.36381	13.8205	7.66225	9.06616	6.04368	8.58803	13.5368	20.2088	18.7389	21.5257	12.8641	17.2416	14.3877	22.9692	-0.57085	0.0011909	0.0061642	BC030870	chr8	-	65085613	65129563	1507	lincRNA	cDNA_sequence_BC030870	8	16	9	9	5	9	17	22	17	22	11	18	12	23	0.26407	0.433127	0.240555	0.281894	0.188737	0.266362	0.431457	0.59911	0.541776	0.632929
ENSMUSG00000035578	245.687	257.407	274.99	333.433	262.296	272.908	235.7	375.7	417.767	430.515	410.483	429.124	383.673	388.479	-0.57041	2.837e-16	9.2679e-15	Iqcg	chr16	-	33015385	33056218	2916	protein_coding	IQ_motif_containing_G	235	298	323	331	217	286	296	409	379	440	351	448	320	389	4.00887	4.16905	4.46169	5.35793	4.23325	4.37443	3.88245	5.75616	6.24218	6.54201
ENSMUSG00000029601	182.958	168.437	166.867	137	155.927	158.401	193.497	261.796	303.129	267.115	265.469	240.424	227.806	210.717	-0.5704	4.742e-11	9.5484e-10	Iqcd	chr5	+	120589016	120607114	1668	protein_coding	IQ_motif_containing_D	175	195	196	136	129	166	243	285	275	273	227	251	190	211	5.21896	4.76922	4.73309	3.84857	4.39942	4.4387	5.57202	7.01206	7.9181	7.09598
ENSMUSG00000084052	19.864	16.4118	22.9867	31.2279	21.7572	28.6268	27.0737	35.8247	47.3984	38.1593	30.4061	43.1039	44.3622	38.9478	-0.57007	0.00013455	0.0009213	Gm11745	chr11	+	117134598	117135045	448	pseudogene	predicted_gene_11745	19	19	27	31	18	30	34	39	43	39	26	45	37	39	2.10968	1.73015	2.42756	3.26618	2.28558	2.98667	2.90271	3.57259	4.60972	3.77426
ENSMUSG00000081605	13.5912	17.2756	15.3245	10.0735	20.5485	13.3592	24.6848	35.8247	29.7618	30.3317	25.7283	25.8624	19.1836	33.9545	-0.57	0.00056515	0.0032354	Gm15953	chr16	+	38512565	38514296	1732	pseudogene	predicted_gene_15953	13	20	18	10	17	14	31	39	27	31	22	27	16	34	0.373368	0.471076	0.41861	0.272527	0.558345	0.360515	0.684567	0.924089	0.748687	0.775996
ENSMUSG00000041920	2670.15	2358.12	3010.41	2853.83	2822.4	2787.29	2800.53	3934.28	4199.72	3919.64	4259.2	4136.06	4041.75	4326.2	-0.5692	6.0758e-37	6.0712e-35	Slc16a6	chr11	-	109450855	109473598	4219	protein_coding	solute_carrier_family_16_(monocarboxylic_acid_transporters)_member_6	2554	2730	3536	2833	2335	2921	3517	4283	3810	4006	3642	4318	3371	4332	30.1129	26.3975	33.7588	31.6952	31.4832	30.8792	31.8834	41.6616	43.371	41.1668
ENSMUSG00000097716	19.864	8.6378	17.8786	8.05881	12.0874	13.3592	15.9257	32.1503	31.9664	20.5473	12.8641	24.9045	25.1785	26.9638	-0.56774	0.0010175	0.0053832	1700026J14Rik	chr6	-	48536582	48537474	794	lincRNA	RIKEN_cDNA_1700026J14_gene	19	10	21	8	10	14	20	35	29	21	11	26	21	27	1.19035	0.513793	1.06533	0.475583	0.716442	0.786413	0.963411	1.80902	1.75413	1.14669
ENSMUSG00000035984	149.503	148.57	147.285	170.242	107.577	154.584	129.794	239.75	255.731	182.969	212.843	196.362	213.418	238.68	-0.56636	9.3598e-10	1.6209e-08	Nme5	chr18	-	34562634	34579115	849	protein_coding	NME/NM23_family_member_5	143	172	173	169	89	162	163	261	232	187	182	205	178	239	8.37857	8.26475	8.20773	9.39584	5.96326	8.51041	7.34314	12.6162	13.124	9.54948
ENSMUSG00000042510	126.503	139.932	129.407	141.029	163.179	140.271	137.757	215.867	236.992	203.516	218.69	206.899	182.245	208.72	-0.56629	8.2565e-13	2.0237e-11	AA986860	chr1	+	130731976	130744622	3205	protein_coding	expressed_sequence_AA986860	121	162	152	140	135	147	173	235	215	208	187	216	152	209	1.87802	2.06203	1.91029	2.06185	2.39611	2.04566	2.06452	3.0091	3.22177	2.81372
ENSMUSG00000041653	1390.48	1237.8	1424.33	1652.06	1375.54	1396.99	1715.99	2513.24	2279.53	2032.23	1914.42	2220.33	2207.32	2125.15	-0.56475	2.4643e-17	8.8555e-16	Pnpla3	chr15	+	84167816	84189512	4640	protein_coding	patatin-like_phospholipase_domain_containing_3	1330	1433	1673	1640	1138	1464	2155	2736	2068	2077	1637	2318	1841	2128	14.2586	12.599	14.5232	16.6833	13.9517	14.0723	17.7636	24.1989	21.4051	19.4073
ENSMUSG00000070044	2194.45	2382.31	2348.91	2443.83	2459.78	2519.15	2321.17	3564.09	3720.22	3569.36	3497.88	3609.24	3443.46	3296.58	-0.56225	2.1892e-56	4.3061e-54	Fam149a	chr8	-	45336717	45382291	5469	protein_coding	family_with_sequence_similarity_149_member_A	2099	2758	2759	2426	2035	2640	2915	3880	3375	3648	2991	3768	2872	3301	19.0918	20.5729	20.3202	20.9382	21.1669	21.5298	20.386	29.1153	29.6381	28.9196
ENSMUSG00000049291	36.5917	62.1922	45.9735	63.4631	35.0533	54.3908	30.2588	82.6723	80.4671	68.491	85.3711	68.0084	69.5407	69.9063	-0.56132	3.5312e-05	0.0002815	Prss38	chr11	-	59372669	59375657	1243	protein_coding	protease_serine_38	35	72	54	63	29	57	38	90	73	70	73	71	58	70	1.40068	2.36304	1.74988	2.39236	1.32718	2.04525	1.16927	2.97145	2.82057	2.44159
ENSMUSG00000042726	4865.64	4809.53	4971.95	5460.85	5218.11	5296.9	5296.88	8467.48	7781.05	7386.26	7140.77	7793.19	7719.02	6977.64	-0.56058	6.9833e-39	7.5867e-37	Trafd1	chr5	-	121371725	121385632	3083	protein_coding	TRAF_type_zinc_finger_domain_containing_1	4654	5568	5840	5421	4317	5551	6652	9218	7059	7549	6106	8136	6438	6987	75.0922	73.6774	76.2999	82.997	79.6544	80.3047	82.5241	122.704	109.965	106.16
ENSMUSG00000087231	361.735	311.825	239.232	279.036	168.014	258.595	303.384	461.128	558.86	361.045	392.941	444.45	357.295	398.466	-0.56054	6.6576e-07	7.4852e-06	E230016M11Rik	chr6	+	67036599	67080654	2473	processed_transcript	RIKEN_cDNA_E230016M11_gene	346	361	281	277	139	271	381	502	507	369	336	464	298	399	6.95975	5.95514	4.57685	5.28704	3.19736	4.88752	5.89255	8.33061	9.84619	6.46916
ENSMUSG00000036480	82.5926	47.5079	77.4739	54.397	65.2717	79.2007	116.257	124.927	120.149	126.219	104.083	119.733	73.1376	188.747	-0.56027	0.00017095	0.001138	Prss56	chr1	+	87183313	87188405	2180	protein_coding	protease_serine_56	79	55	91	54	54	83	146	136	109	129	89	125	61	189	1.80265	1.02924	1.68139	1.16921	1.40909	1.69811	2.56152	2.56023	2.40134	2.56554
ENSMUSG00000041734	2665.96	2350.35	2503.85	2742.01	2631.42	2751.99	2620.57	3752.4	3971.55	3717.1	3924.73	3958.86	3867.9	3833.86	-0.5601	9.5565e-55	1.8038e-52	Kirrel	chr3	-	87078593	87174747	7278	protein_coding	kin_of_IRRE_like_(Drosophila)	2550	2721	2941	2722	2177	2884	3291	4085	3603	3799	3356	4133	3226	3839	17.4289	15.2519	16.2767	17.6536	17.0156	17.6737	17.2949	23.0344	23.7759	22.631
ENSMUSG00000034936	1681.13	1840.72	1756.36	1941.17	2039.14	1936.12	2177.84	3160.84	2599.2	3019.47	2623.11	3034.52	2678.52	2773.28	-0.5584	3.9687e-22	1.8918e-20	Arl4d	chr11	+	101665541	101667832	1382	protein_coding	ADP-ribosylation_factor-like_4D	1608	2131	2063	1927	1687	2029	2735	3441	2358	3086	2243	3168	2234	2777	57.8788	62.9049	60.1279	65.8158	69.4398	65.4813	75.6922	102.182	81.9446	96.813
ENSMUSG00000032702	1328.8	1249.89	1202.97	1400.22	1194.23	1370.27	1372	1978.62	2000.65	1841.43	1957.69	1932.97	1909.97	1878.48	-0.55791	5.6321e-41	6.6189e-39	Kank1	chr19	+	25236975	25434496	5637	protein_coding	KN_motif_and_ankyrin_repeat_domains_1	1271	1447	1413	1390	988	1436	1723	2154	1815	1882	1674	2018	1593	1881	11.216	10.472	10.0967	11.6392	9.97035	11.3619	11.6907	15.6818	15.4637	14.475
ENSMUSG00000087286	4.1819	10.3654	20.4327	10.0735	9.66988	12.4049	18.3145	21.1274	33.0687	19.5689	26.8977	31.6096	17.9847	14.9799	-0.55757	0.0017247	0.0084898	Gm9013	chr14	-	60039610	60040491	882	pseudogene	predicted_gene_9013	4	12	24	10	8	13	23	23	30	20	23	33	15	15	0.225597	0.555036	1.09604	0.535165	0.515968	0.657382	0.997381	1.07018	1.63357	0.983121
ENSMUSG00000015133	178.776	186.577	128.556	125.919	128.126	104.965	186.33	331.608	279.981	212.322	184.776	197.32	173.852	333.553	-0.55756	0.00025296	0.0015921	Lrrk1	chr7	-	66226912	66388350	7465	protein_coding	leucine-rich_repeat_kinase_1	171	216	151	125	106	110	234	361	254	217	158	206	145	334	1.13948	1.18041	0.814764	0.790382	0.807751	0.657213	1.19891	1.98461	1.63414	1.2603
ENSMUSG00000023908	126.503	120.065	126.853	118.867	114.83	134.546	133.776	190.146	208.333	156.551	208.165	193.489	202.627	165.778	-0.55654	7.0064e-11	1.3884e-09	Pkmyt1	chr17	+	23726336	23736729	2039	protein_coding	protein_kinase_membrane_associated_tyrosine/threonine_1	121	139	149	118	95	141	168	207	189	160	178	202	169	166	2.95196	2.78103	2.94343	2.73163	2.65038	3.08422	3.15133	4.1663	4.45173	3.40211
ENSMUSG00000037995	3077.88	2568.02	3196.86	3077.46	3046.01	2915.16	2948.64	4512.07	4610.87	4075.21	4482.57	4691.62	4502.16	3953.7	-0.55548	3.1219e-30	2.3714e-28	Igsf9	chr1	+	172481788	172498878	4205	protein_coding	immunoglobulin_superfamily_member_9	2944	2973	3755	3055	2520	3055	3703	4912	4183	4165	3833	4898	3755	3959	34.8268	28.8428	35.969	34.2927	34.0907	32.4032	33.6814	47.939	47.7756	42.9432
ENSMUSG00000052609	1295.34	1267.17	1322.16	1339.78	1274.01	1180.38	1432.51	2245.93	2018.29	1672.16	1771.74	1976.08	2136.58	1731.68	-0.55537	2.5331e-19	1.029e-17	Plekhg3	chr12	+	76533560	76579039	4955	protein_coding	pleckstrin_homology_domain_containing_family_G_(with_RhoGef_domain)_member_3	1239	1467	1553	1330	1054	1237	1799	2445	1831	1709	1515	2063	1782	1734	12.4385	12.078	12.6244	12.6696	12.1004	11.1345	13.8864	20.2503	17.7472	14.9535
ENSMUSG00000097907	215.368	241.859	217.097	206.507	171.64	220.426	244.459	337.119	394.619	332.67	286.519	331.421	306.938	295.604	-0.55503	5.037e-12	1.1367e-10	Raxos1	chr18	+	65937538	65940447	2547	lincRNA	retina_and_anterior_neural_fold_homeobox_opposite_strand_1	206	280	255	205	142	231	307	367	358	340	245	346	256	296	4.02328	4.48475	4.0327	3.79911	3.17147	4.04507	4.61011	5.91336	6.75054	5.78756
ENSMUSG00000075410	2882.38	2669.95	3057.24	3056.3	3240.62	3156.58	2711.35	4723.34	4163.34	4319.82	4101.32	4502.93	4480.58	4376.13	-0.55371	3.7637e-33	3.2559e-31	Gm11744	chr11	+	116653534	116668389	1227	protein_coding	predicted_gene_11744	2757	3091	3591	3034	2681	3308	3405	5142	3777	4415	3507	4701	3737	4382	111.772	102.769	117.884	116.715	124.295	120.244	106.139	171.983	147.838	156.003
ENSMUSG00000021384	2215.36	2073.07	2293.57	2241.36	2445.27	2234.8	2001.06	3401.51	3010.35	3399.11	3320.12	3291.23	3027.42	3420.41	-0.5535	2.4617e-34	2.3e-32	Susd3	chr13	-	49230690	49248706	1418	protein_coding	sushi_domain_containing_3	2119	2400	2694	2225	2023	2342	2513	3703	2731	3474	2839	3436	2525	3425	74.3355	69.0469	76.5255	74.0646	81.1561	73.6638	67.7826	107.17	92.4975	106.218
ENSMUSG00000087063	96.1838	79.4678	70.663	73.5366	72.5241	78.2465	85.9987	140.543	132.275	137.96	94.7268	111.112	133.087	100.865	-0.55301	2.9203e-07	3.5024e-06	Gm15857	chr5	-	123293638	123310324	789	antisense	predicted_gene_15857	92	92	83	73	60	82	108	153	120	141	81	116	111	101	5.80033	4.75685	4.23727	4.36719	4.32589	4.63532	5.23539	7.95814	7.30447	7.74797
ENSMUSG00000097970	17.7731	21.5945	14.4731	20.147	13.2961	8.58803	15.1294	34.9061	28.6595	15.6551	17.542	36.3989	31.1734	31.9572	-0.55291	0.0012053	0.0062317	Gm27028	chr1	+	23291537	23291935	399	lincRNA	predicted_gene_27028	17	25	17	20	11	9	19	38	26	16	15	38	26	32	2.11942	2.55609	1.71617	2.36599	1.56827	1.00603	1.82131	3.90848	3.12957	1.73857
ENSMUSG00000097443	55.4102	68.2387	45.1221	27.1985	36.2621	55.3451	77.2395	92.7767	102.513	63.5988	74.8459	90.0393	67.1428	107.855	-0.55285	0.00022551	0.0014416	Gm17529	chr12	+	58953095	58968011	3087	lincRNA	predicted_gene_17529	53	79	53	27	30	58	97	101	93	65	64	94	56	108	0.854045	1.044	0.69155	0.412842	0.552823	0.837982	1.20181	1.34271	1.44687	0.912898
ENSMUSG00000055150	177.731	170.165	181.34	145.059	175.267	213.746	198.275	289.353	265.652	262.223	239.741	274.907	266.173	289.612	-0.55273	1.2111e-12	2.92e-11	Zfp78	chr7	+	6371364	6379491	1539	protein_coding	zinc_finger_protein_78	170	197	213	144	145	224	249	315	241	268	205	287	222	290	5.4948	5.222	5.57475	4.41652	5.35958	6.49161	6.18818	8.3998	7.52078	7.54991
ENSMUSG00000078773	111.866	113.155	76.6225	124.912	90.6552	103.056	119.443	191.983	176.366	137.96	140.336	183.91	166.658	133.821	-0.55259	3.2735e-07	3.9011e-06	Rad54b	chr4	+	11558922	11615805	2870	protein_coding	RAD54_homolog_B_(S._cerevisiae)	107	131	90	124	75	108	150	209	160	141	120	192	139	134	1.85457	1.86208	1.26312	2.03937	1.48655	1.67836	1.99899	2.98856	2.67746	2.13002
ENSMUSG00000004668	241.505	246.177	257.962	256.875	200.65	241.419	237.293	358.247	326.277	356.153	369.552	383.146	395.663	321.569	-0.55254	2.5641e-16	8.4352e-15	Abca13	chr11	+	9191942	9684259	16011	protein_coding	ATP-binding_cassette_sub-family_A_(ABC1)_member_13	231	285	303	255	166	253	298	390	296	364	316	400	330	322	0.717687	0.726165	0.76227	0.751759	0.589781	0.704767	0.711869	0.999639	0.887887	0.985663
ENSMUSG00000082429	14.6367	7.77402	17.8786	32.2352	14.5048	21.9472	17.5182	48.6848	34.1709	35.2239	26.8977	38.3146	15.5867	28.9612	-0.55236	0.0015387	0.0076877	Gm13171	chr4	-	155502316	155502706	391	pseudogene	predicted_gene_13171	14	9	21	32	12	23	22	53	31	36	23	40	13	29	1.78112	0.93902	2.16335	3.86305	1.74585	2.62358	2.15203	5.56283	3.80776	3.99182
ENSMUSG00000091831	7.31833	12.0929	22.9867	22.1617	7.25241	16.2218	12.7405	18.3716	29.7618	29.3533	32.7451	26.8202	20.3826	25.9652	-0.55208	0.001413	0.0071399	Gm4707	chr17	-	71458327	71460395	1452	protein_coding	predicted_gene_4707	7	14	27	22	6	17	16	20	27	30	28	28	17	26	0.239813	0.393342	0.749	0.715176	0.235064	0.522187	0.421459	0.565276	0.893062	0.895778
ENSMUSG00000100714	12.5457	19.0032	11.9191	4.02941	8.46115	13.3592	20.7034	25.7203	18.7389	21.5257	23.3893	41.1882	15.5867	25.9652	-0.55154	0.001965	0.0095051	RP23-158L19.7	chrX	-	13234641	13247736	578	lincRNA	RIKEN_cDNA_2010308F09_gene	12	22	14	4	7	14	26	28	17	22	20	43	13	26	1.03275	1.55276	0.975629	0.326655	0.688924	1.0803	1.72047	1.98805	1.41256	1.65022
ENSMUSG00000033871	1492.94	1263.71	1363.88	1509.01	1514.55	1437.06	1338.55	1980.46	2196.86	2007.76	2081.65	2125.5	2213.31	2004.31	-0.55104	5.5721e-34	5.1291e-32	Ppargc1b	chr18	-	61298136	61400431	3656	protein_coding	peroxisome_proliferative_activated_receptor_gamma_coactivator_1_beta	1428	1463	1602	1498	1253	1506	1681	2156	1993	2052	1780	2219	1846	2007	19.4296	16.3248	17.6498	19.3403	19.496	18.3722	17.5859	24.2013	26.181	24.3342
ENSMUSG00000047798	23.0005	25.9134	22.9867	19.1397	10.8786	20.993	17.5182	54.1963	22.0458	24.4611	31.5756	40.2303	26.3775	43.9411	-0.54956	0.0010129	0.0053614	Cd300lf	chr11	-	115116214	115133992	3929	protein_coding	CD300_antigen_like_family_member_F	22	30	27	19	9	22	22	59	20	25	27	42	22	44	0.278537	0.311493	0.2768	0.228259	0.130305	0.249738	0.214162	0.616264	0.244474	0.27587
ENSMUSG00000005233	1404.07	1325.04	1987.93	1995.56	2074.19	1998.15	1348.11	2265.22	2513.22	2867.81	3003.19	2837.2	2809.2	2287.93	-0.54923	1.0957e-06	1.1863e-05	Spc25	chr2	-	69193895	69206194	1869	protein_coding	SPC25_NDC80_kinetochore_complex_component_homolog_(S._cerevisiae)	1343	1534	2335	1981	1716	2094	1693	2466	2280	2931	2568	2962	2343	2291	35.7444	33.483	50.3225	50.0301	52.2287	49.9702	34.6457	54.1478	58.5882	67.9911
ENSMUSG00000091997	13.5912	13.8205	18.7299	23.1691	9.66988	12.4049	13.5368	19.2902	26.4549	28.3748	22.2199	36.3989	21.5816	27.9625	-0.54913	0.00107	0.0056224	Gm6611	chr16	+	32923218	32924489	1272	pseudogene	predicted_gene_6611	13	16	22	23	8	13	17	21	24	29	19	38	18	28	0.508391	0.513147	0.696659	0.853488	0.35777	0.455827	0.511168	0.677531	0.906168	0.988454
ENSMUSG00000039099	20.9095	45.7804	29.7976	37.272	30.2184	35.3063	37.4253	78.998	65.035	34.2455	43.2703	49.809	43.1632	79.8929	-0.54876	0.00051777	0.0030065	Wdr93	chr7	+	79743163	79785950	2285	protein_coding	WD_repeat_domain_93	20	53	35	37	25	37	47	86	59	35	37	52	36	80	0.435397	0.946234	0.616973	0.764315	0.622379	0.722202	0.786708	1.54458	1.24008	0.664091
ENSMUSG00000031450	38786.1	39880.7	35393.6	38288.4	37647.3	39462.9	36621.1	59141.9	60275.3	51639.3	51212.1	54449.9	54788.5	59665	-0.54848	4.9195e-39	5.3758e-37	Grk1	chr8	+	13405081	13421945	7425	protein_coding	G_protein-coupled_receptor_kinase_1	37099	46170	41573	38009	31146	41356	45990	64384	54682	52777	43791	56845	45696	59745	248.546	253.672	225.527	241.628	238.62	248.419	236.902	355.859	353.698	308.173
ENSMUSG00000028391	1447.98	1587.63	1101.66	1394.17	1176.1	1292.98	1708.83	2523.34	2784.38	1584.1	1945.99	1993.32	1840.43	2302.91	-0.54807	4.4707e-06	4.3151e-05	Wdr31	chr4	-	62448653	62470896	2549	protein_coding	WD_repeat_domain_31	1385	1838	1294	1384	973	1355	2146	2747	2526	1619	1664	2081	1535	2306	27.0285	29.4161	20.4479	25.6285	21.7142	23.709	32.2004	44.2268	47.5935	27.5374
ENSMUSG00000100975	165.185	152.025	135.366	139.014	158.344	193.708	171.201	250.773	273.368	167.314	216.351	286.402	225.408	266.643	-0.54624	9.4117e-08	1.2205e-06	RP24-159O13.1	chr12	-	104925501	104926142	642	lincRNA	predicted_gene_28875	158	176	159	138	131	203	215	273	248	171	185	299	188	267	12.2423	11.1837	9.97577	10.1461	11.6075	14.1028	12.8087	17.4512	18.5524	11.548
ENSMUSG00000041840	226.868	269.5	204.327	232.698	204.276	240.465	240.478	424.384	395.722	282.77	304.061	304.601	327.321	390.476	-0.5462	1.4689e-09	2.4616e-08	Haus1	chr18	-	77757567	77767780	1004	protein_coding	HAUS_augmin-like_complex_subunit_1	217	312	240	231	169	252	302	462	359	289	260	318	273	391	10.7515	12.6774	9.62858	10.8601	9.57534	11.1946	11.5047	18.8845	17.173	12.4799
ENSMUSG00000071103	449.555	445.711	381.41	465.396	384.378	395.049	473.789	813.863	725.306	581.195	544.972	585.256	625.866	587.213	-0.5449	2.3615e-11	4.958e-10	1700029J07Rik	chr8	-	45953606	45975252	2740	protein_coding	RIKEN_cDNA_1700029J07_gene	430	516	448	462	318	414	595	886	658	594	466	611	522	588	7.80656	7.6826	6.58585	7.95881	6.60204	6.73896	8.30555	13.2703	11.5335	9.399
ENSMUSG00000097387	14.6367	13.8205	20.4327	23.1691	21.7572	21.9472	16.722	29.3946	39.6824	30.3317	29.2367	31.6096	21.5816	35.9518	-0.54356	0.00058741	0.0033475	4930563E18Rik	chr18	+	10706860	10711832	1553	lincRNA	RIKEN_cDNA_4930563E18_gene	14	16	24	23	18	23	21	32	36	31	25	33	18	36	0.448434	0.420298	0.622478	0.699058	0.659329	0.660541	0.51719	0.845621	1.11331	0.865438
ENSMUSG00000089709	396.235	405.977	379.707	445.249	328.776	454.211	445.123	665.053	640.43	502.919	547.311	601.539	601.887	678.091	-0.54265	3.3743e-13	8.6256e-12	Gm16262	chr9	-	94695704	94702319	1751	antisense	predicted_gene_16262	379	470	446	442	272	476	559	724	581	514	468	628	502	679	10.767	10.9502	10.2597	11.915	8.83658	12.1245	12.2103	16.9687	15.9358	12.7269
ENSMUSG00000038963	3848.4	3267.68	3299.02	4026.38	3322.81	3585.02	3486.13	5089.86	5898.35	5049.74	5226.35	5316.15	5034.51	4837.51	-0.54244	5.4078e-26	3.335e-24	Slco4a1	chr2	+	180456245	180474867	3101	protein_coding	solute_carrier_organic_anion_transporter_family_member_4a1	3681	3783	3875	3997	2749	3757	4378	5541	5351	5161	4469	5550	4199	4844	59.0481	49.7672	50.3332	60.84	50.4283	54.0359	53.9978	73.3303	82.8739	72.1569
ENSMUSG00000060678	5.22738	13.8205	6.81089	10.0735	19.3398	7.6338	11.9443	21.1274	18.7389	19.5689	11.6947	14.368	31.1734	23.9679	-0.54173	0.0024524	0.011451	Hist1h4c	chr13	-	23698060	23698454	395	protein_coding	histone_cluster_1_H4c	5	16	8	10	16	8	15	23	17	20	10	15	26	24	0.629672	1.65246	0.815788	1.19498	2.30422	0.903309	1.45243	2.38961	2.06698	2.19522
ENSMUSG00000032204	2.09095	6.04646	10.2163	12.0882	6.04368	12.4049	5.57399	14.6973	14.3297	17.612	12.8641	13.4101	16.7857	16.9772	-0.5414	0.0026889	0.012354	Aqp9	chr9	-	71110659	71168682	2765	protein_coding	aquaporin_9	2	7	12	12	5	13	7	16	13	18	11	14	14	17	0.0359813	0.103279	0.174812	0.204853	0.102867	0.209697	0.0968289	0.237477	0.225805	0.282243
ENSMUSG00000033029	80.5016	71.6938	56.1898	85.6249	60.4368	85.8803	85.2024	124.927	110.229	102.736	142.675	109.197	88.7244	123.834	-0.5412	2.2638e-06	2.3103e-05	1700088E04Rik	chr15	-	79129349	79141253	3025	protein_coding	RIKEN_cDNA_1700088E04_gene	77	83	66	85	50	90	107	136	100	105	122	114	74	124	1.26621	1.11934	0.878826	1.32633	0.940256	1.32697	1.35288	1.84506	1.58767	1.50491
ENSMUSG00000084869	13.5912	13.8205	22.1354	28.2058	21.7572	29.581	23.8885	32.1503	38.5801	25.4395	42.1008	29.6938	33.5714	56.9237	-0.54006	0.00097816	0.0052044	Gm13063	chr4	+	132048178	132048961	669	lincRNA	predicted_gene_13063	13	16	26	28	18	31	30	35	35	26	36	31	28	57	0.966627	0.97567	1.56542	1.97555	1.53055	2.06671	1.71513	2.14703	2.51262	1.68497
ENSMUSG00000025900	39289	39205.3	33996.6	34579.3	33812	37119.4	39287.1	52366.5	63475.3	51622.6	52410.8	53445.1	50949.4	52623.4	-0.53972	3.0696e-26	1.9444e-24	Rp1	chr1	-	4343507	4360314	7508	protein_coding	retinitis_pigmentosa_1_(human)	37580	45388	39932	34327	27973	38900	49338	57008	57585	52760	44816	55796	42494	52694	248.986	246.618	214.231	215.808	211.942	231.083	251.339	311.608	368.358	304.668
ENSMUSG00000051000	1529.53	1644.64	1315.35	1407.27	1242.58	1411.3	1512.14	2466.39	2460.31	1674.12	1944.82	1943.51	1856.02	2555.57	-0.5352	9.6327e-11	1.8652e-09	Fam160a1	chr3	-	85660061	85746266	4445	protein_coding	family_with_sequence_similarity_160_member_A1	1463	1904	1545	1397	1028	1479	1899	2685	2232	1711	1663	2029	1548	2559	16.3725	17.4745	14.0004	14.8348	13.156	14.8402	16.3401	24.7896	24.1161	16.6888
ENSMUSG00000050930	555.148	569.231	629.156	542.962	605.577	581.123	546.251	747.725	823.409	784.711	899.32	929.129	828.494	877.823	-0.53488	1.7145e-22	8.3145e-21	Map10	chr8	+	125669818	125673359	3542	protein_coding	microtubule-associated_protein_10	531	659	739	539	501	609	686	814	747	802	769	970	691	879	7.4574	7.59007	8.40389	7.18285	8.04619	7.66853	7.4076	9.43133	10.1288	9.81684
ENSMUSG00000085150	23.0005	18.1394	14.4731	17.125	14.5048	11.4507	11.9443	25.7203	15.432	28.3748	33.9145	37.3568	35.9693	15.9786	-0.5348	0.0018175	0.0088741	Gm16346	chr8	+	16226003	16232305	937	antisense	predicted_gene_16346	22	21	17	17	12	12	15	28	14	29	29	39	30	16	1.16795	0.9143	0.730792	0.856379	0.728523	0.571196	0.612285	1.22635	0.717584	1.34185
ENSMUSG00000016386	487.192	512.222	463.14	462.374	476.242	507.648	492.103	801.003	609.565	722.091	678.291	676.253	721.785	761.978	-0.53448	1.0423e-20	4.6042e-19	Mpped2	chr2	+	106693269	106868356	2848	protein_coding	metallophosphoesterase_domain_containing_2	466	593	544	459	394	532	618	872	553	738	580	706	602	763	8.13931	8.49422	7.69385	7.60728	7.86969	8.33134	8.29947	12.5653	9.32545	11.2347
ENSMUSG00000097140	177.731	150.298	164.313	143.044	130.543	177.486	165.627	225.971	291.004	236.783	216.351	245.214	194.234	236.683	-0.5326	1.2374e-09	2.1058e-08	Gm26779	chr5	+	109886231	109891137	551	lincRNA	predicted_gene_26779	170	174	193	142	108	186	208	246	264	242	185	256	162	237	15.3476	12.8827	14.1088	12.1645	11.15	15.0558	14.4382	18.3223	23.0111	19.0419
ENSMUSG00000097738	13.5912	19.0032	18.7299	17.125	8.46115	13.3592	12.7405	30.3132	23.1481	18.5904	21.0504	33.5253	16.7857	34.9531	-0.53228	0.0017713	0.0086805	4930445N18Rik	chr18	+	82855894	82870604	1033	lincRNA	RIKEN_cDNA_4930445N18_gene	13	22	22	17	7	14	16	33	21	19	18	35	14	35	0.626015	0.868823	0.857841	0.776793	0.385478	0.604465	0.592409	1.31102	0.976345	0.797442
ENSMUSG00000037112	999.475	978.663	853.064	905.609	777.217	816.817	1043.13	1337.45	1591.7	1260.23	1375.29	1341.01	1245.74	1202.39	-0.53181	5.0708e-15	1.5308e-13	Sik2	chr9	-	50892801	51009073	5369	protein_coding	salt_inducible_kinase_2	956	1133	1002	899	643	856	1310	1456	1444	1288	1176	1400	1039	1204	8.8574	8.60885	7.51725	7.90356	6.81269	7.11089	9.33211	11.1292	12.9169	10.4008
ENSMUSG00000085583	448.509	406.841	401.842	510.727	431.519	401.729	472.196	629.228	715.385	497.049	657.241	673.379	634.259	708.051	-0.53072	7.2744e-13	1.7956e-11	Gm15676	chr7	-	126800790	126809108	799	antisense	predicted_gene_15676	429	471	472	507	357	421	593	685	649	508	562	703	529	709	26.7087	24.0482	23.7947	29.9514	25.4169	23.5006	28.3864	35.1836	39.0106	27.5653
ENSMUSG00000086671	7.31833	10.3654	5.95953	4.02941	3.62621	9.54225	7.96284	17.453	17.6366	10.7629	11.6947	22.0309	7.19387	11.9839	-0.53044	0.003493	0.015416	Gm13618	chr2	+	66187836	66192813	384	antisense	predicted_gene_13618	7	12	7	4	3	10	10	19	16	11	10	23	6	12	0.906794	1.27485	0.734263	0.491683	0.444418	1.16148	0.996026	2.03058	2.00112	1.24196
ENSMUSG00000085794	3570.3	3116.52	3820.06	4030.41	3517.42	3887.51	3918.51	6080.09	4840.15	5245.43	4422.92	5152.36	6027.26	6100.82	-0.52992	1.2749e-14	3.6934e-13	Vax2os	chr6	-	83692806	83712201	4063	antisense	ventral_anterior_homeobox_2_opposite_strand	3415	3608	4487	4001	2910	4074	4921	6619	4391	5361	3782	5379	5027	6109	41.8105	36.2267	44.483	46.4813	40.7425	44.7216	46.3243	66.8563	51.904	57.2064
ENSMUSG00000020007	21.955	20.7307	13.6218	23.1691	15.7136	22.9014	11.9443	32.1503	35.2732	34.2455	26.8977	24.9045	27.5765	30.9585	-0.52968	0.00089813	0.0048504	Il20ra	chr10	+	19712587	19760053	2088	protein_coding	interleukin_20_receptor_alpha	21	24	16	23	13	24	15	35	32	35	23	26	23	31	0.5003	0.46891	0.308656	0.519941	0.354172	0.512654	0.274766	0.687915	0.736044	0.726747
ENSMUSG00000071984	467.328	364.515	323.517	480.507	454.485	372.148	488.918	613.612	802.466	634.031	511.057	559.393	527.55	855.853	-0.52967	1.7931e-05	0.00015341	Fndc1	chr17	-	7738569	7827302	5845	protein_coding	fibronectin_type_III_domain_containing_1	447	422	380	477	376	390	614	668	728	648	437	584	440	857	3.80421	2.94535	2.61869	3.85204	3.65936	2.97593	4.01778	4.69017	5.98179	4.80658
ENSMUSG00000086680	14.6367	7.77402	15.3245	10.0735	9.66988	13.3592	12.7405	23.8831	28.6595	12.7198	11.6947	22.0309	26.3775	23.9679	-0.52951	0.002458	0.011471	Gm11592	chr11	+	97280128	97282897	637	antisense	predicted_gene_11592	14	9	18	10	8	14	16	26	26	13	10	23	22	24	1.09328	0.576384	1.1382	0.740998	0.714417	0.980239	0.960689	1.67506	1.96028	0.884809
ENSMUSG00000057948	54.3647	44.9166	83.4334	62.4558	79.7766	88.7429	95.5541	116.66	104.717	121.327	92.3879	115.902	104.311	124.833	-0.52916	2.7979e-05	0.00022851	Unc13d	chr11	-	116062095	116077961	4046	protein_coding	unc-13_homolog_D_(C._elegans)	52	52	98	62	66	93	120	127	95	124	79	121	87	125	0.639321	0.524308	0.975629	0.723307	0.927939	1.02518	1.13438	1.28817	1.12767	1.32874
ENSMUSG00000001211	29242	29757.2	30877.2	32936.4	32524.7	32963.7	30241.3	45287	43687	46645.3	44465.5	45716	44302.2	46115.2	-0.52892	6.5248e-61	1.4344e-58	Agpat3	chr10	-	78269178	78352489	5980	protein_coding	1-acylglycerol-3-phosphate_O-acyltransferase_3	27970	34450	36268	32696	26908	34545	37978	49301	39633	47673	38022	47727	36950	46177	232.666	235.016	244.291	258.077	255.966	257.648	242.903	338.339	318.303	345.634
ENSMUSG00000022994	3732.35	3203.76	3683.84	4111	3765.21	3388.45	4110.42	5811.86	5978.81	4857.97	4991.29	5844.89	5434.97	4960.35	-0.52813	1.2801e-18	5.0145e-17	Adcy6	chr15	-	98589994	98607633	6017	protein_coding	adenylate_cyclase_6	3570	3709	4327	4081	3115	3551	5162	6327	5424	4965	4268	6102	4533	4967	29.5141	25.147	28.9662	32.0142	29.4496	26.3217	32.8126	43.1534	43.2936	35.7754
ENSMUSG00000047747	3479.34	3797.18	3524.63	3649.63	3379.62	3714.8	3972.66	5273.57	5717.57	5355.02	5064.96	5317.11	4999.74	5227.99	-0.52741	2.3423e-41	2.8421e-39	Rnf150	chr8	+	82863356	83091271	9685	protein_coding	ring_finger_protein_150	3328	4396	4140	3623	2796	3893	4989	5741	5187	5473	4331	5551	4170	5235	17.0933	18.5168	17.2181	17.6573	16.4225	17.9278	19.7023	24.3268	25.7218	24.5003
ENSMUSG00000089726	116.048	104.517	79.1766	115.845	80.9853	99.2394	103.517	180.042	155.423	145.788	116.947	160.921	142.678	139.813	-0.52671	3.588e-07	4.2461e-06	Mir17hg	chr14	+	115042879	115046727	3536	lincRNA	Mir17_host_gene_(non-protein_coding)	111	121	93	115	67	104	130	196	141	149	100	168	119	140	1.56154	1.39599	1.05939	1.53512	1.07786	1.31179	1.40615	2.27479	1.9151	1.82692
ENSMUSG00000086578	74.2288	44.0528	75.7711	83.6102	59.228	78.2465	60.5176	69.8122	126.763	118.392	106.422	117.817	83.9284	106.857	-0.52528	5.8259e-05	0.00044235	Gm13583	chr2	+	60550757	60553923	1476	antisense	predicted_gene_13583	71	51	89	83	49	82	76	76	115	121	91	123	70	107	2.39284	1.40959	2.42878	2.65429	1.88847	2.47783	1.96938	2.11312	3.74193	3.55422
ENSMUSG00000069917	6.27286	6.91024	6.81089	12.0882	4.83494	11.4507	9.55541	9.18581	30.8641	24.4611	11.6947	6.70506	20.3826	16.9772	-0.52516	0.0038922	0.016824	Hba-a2	chr11	+	32296489	32297298	554	protein_coding	hemoglobin_alpha_adult_chain_2	6	8	8	12	4	12	12	10	28	25	10	7	17	17	0.538745	0.5891	0.581654	1.02242	0.410725	0.966084	0.828464	0.740777	2.42735	1.95648
ENSMUSG00000020493	148.458	139.932	131.961	155.132	113.621	126.912	155.275	204.844	232.583	182.969	218.69	192.531	183.444	218.707	-0.52416	7.7012e-10	1.3602e-08	Prr11	chr11	-	87089153	87108708	3824	protein_coding	proline_rich_11	142	162	155	154	94	133	195	223	211	187	187	201	153	219	1.84719	1.72825	1.63267	1.9009	1.39834	1.55123	1.95038	2.39323	2.65002	2.12016
ENSMUSG00000092577	26.1369	12.9567	15.3245	8.05881	13.2961	31.4894	10.3517	32.1503	22.0458	35.2239	42.1008	24.9045	28.7755	22.9692	-0.52297	0.0028508	0.012996	Gm7393	chr17	+	14941965	14942703	739	pseudogene	predicted_gene_7393	25	15	18	8	11	33	13	35	20	36	36	26	24	23	1.68282	0.828048	0.981098	0.510978	0.846739	1.99165	0.672823	1.94366	1.29978	2.11205
ENSMUSG00000020718	705.696	675.476	757.711	813.94	710.737	702.31	730.989	1189.56	983.241	998.011	1105.15	1032.58	1035.92	1032.62	-0.52293	3.7909e-24	2.0592e-22	Polg2	chr11	-	106768253	106779537	2728	protein_coding	polymerase_(DNA_directed)_gamma_2_accessory_subunit	675	782	890	808	588	736	918	1295	892	1020	945	1078	864	1034	12.3084	11.6942	13.1411	13.9805	12.2612	12.0331	12.8706	19.4815	15.7038	16.2107
ENSMUSG00000041308	1518.03	1619.59	1561.4	1723.58	1492.79	1567.79	1676.97	2292.78	2613.53	1965.69	2191.58	2498.11	2210.92	2403.78	-0.52278	7.5836e-22	3.5695e-20	Sntb2	chr8	+	106935750	107014192	4423	protein_coding	syntrophin_basic_2	1452	1875	1834	1711	1235	1643	2106	2496	2371	2009	1874	2608	1844	2407	16.3302	17.2939	16.7019	18.2595	15.8837	16.5678	18.2114	23.1593	25.7454	19.6929
ENSMUSG00000046049	12330.3	12312.3	12908.3	13522.7	13875.1	13321.9	12161.6	18849.3	18888.8	19096.3	17699.9	19056.7	18445.1	18262.5	-0.52268	1.852e-54	3.3927e-52	Rp1l1	chr14	+	63992431	64033504	6757	protein_coding	retinitis_pigmentosa_1_homolog_(human)-like_1	11794	14254	15162	13424	11479	13961	15273	20520	17136	19517	15135	19895	15384	18287	86.8258	86.0581	90.3831	93.7745	96.6388	92.1523	86.4515	124.629	121.798	125.229
ENSMUSG00000083588	0	0	1.70272	1.00735	0	2.86268	1.59257	4.5929	8.81831	1.95689	8.18627	8.62079	4.79591	1.99732	-0.52139	0.00089999	0.0048563	Gm8051	chr8	-	31214886	31215351	466	pseudogene	predicted_gene_8051	0	0	2	1	0	3	2	5	8	2	7	9	4	2	0	0	0.172874	0.101291	0	0.28713	0.164152	0.440333	0.824496	0.186076
ENSMUSG00000022383	305.279	340.329	347.355	388.838	320.315	303.444	359.124	473.988	527.996	529.337	463.109	459.775	501.173	481.355	-0.52054	6.1884e-17	2.1574e-15	Ppara	chr15	+	85734983	85802819	3413	protein_coding	peroxisome_proliferator_activated_receptor_alpha	292	394	408	386	265	318	451	516	479	541	396	480	418	482	4.25587	4.70943	4.81513	5.33836	4.41683	4.1556	5.05408	6.20455	6.74037	6.87237
ENSMUSG00000008129	31.3643	27.641	29.7976	28.2058	50.7669	32.4437	37.4253	67.975	31.9664	54.7928	63.1512	49.809	47.9591	53.9277	-0.51901	0.00039055	0.0023488	4930432K21Rik	chr8	+	84148025	84172590	2366	protein_coding	RIKEN_cDNA_4930432K21_gene	30	32	35	28	42	34	47	74	29	56	54	52	40	54	0.630737	0.551752	0.595851	0.558599	1.0098	0.640925	0.759775	1.28355	0.588664	1.02617
ENSMUSG00000053675	19.864	13.8205	25.5408	32.2352	16.9223	15.2676	22.296	45.0105	34.1709	28.3748	35.084	30.6517	26.3775	37.9491	-0.51901	0.0012051	0.0062317	Tgm5	chr2	-	121046111	121085841	2613	protein_coding	transglutaminase_5	19	16	30	32	14	16	28	49	31	29	30	32	22	38	0.361706	0.249798	0.462452	0.578052	0.304782	0.273101	0.409846	0.76958	0.569779	0.481176
ENSMUSG00000078494	17.7731	10.3654	11.0677	8.05881	9.66988	10.4965	15.9257	30.3132	28.6595	18.5904	19.8809	28.736	13.1888	10.9853	-0.51878	0.003462	0.0153	Gm13201	chr4	-	148071392	148075420	642	antisense	predicted_gene_13201	17	12	13	8	8	11	20	33	26	19	17	30	11	11	1.31721	0.762527	0.815629	0.588182	0.708853	0.764189	1.19151	2.10948	1.94501	1.28311
ENSMUSG00000100005	48.0919	47.5079	24.6895	41.3014	38.6795	38.169	56.5362	75.3236	94.7968	61.6419	56.1344	58.4298	41.9642	76.8969	-0.5186	0.00048374	0.0028362	RP24-240G4.2	chr7	+	70365159	70411146	5451	processed_transcript	RIKEN_cDNA_B130024G19_gene	46	55	29	41	32	40	71	82	86	63	48	61	35	77	0.419782	0.411619	0.214292	0.355029	0.333945	0.327286	0.498178	0.617355	0.757716	0.501083
ENSMUSG00000039653	9.40928	12.0929	15.3245	21.1544	4.83494	11.4507	10.3517	19.2902	19.8412	28.3748	21.0504	14.368	21.5816	25.9652	-0.51826	0.0030631	0.013799	Baat	chr4	-	49489422	49506557	1941	protein_coding	bile_acid-Coenzyme_A:_amino_acid_N-acyltransferase	9	14	18	21	4	12	13	21	18	29	18	15	18	26	0.230653	0.294247	0.373535	0.510682	0.117229	0.27574	0.256165	0.444008	0.445381	0.647766
ENSMUSG00000078519	25.0914	24.1859	19.5813	32.2352	14.5048	29.581	23.8885	37.6618	29.7618	45.0084	37.423	40.2303	29.9744	48.9344	-0.51792	0.00069122	0.0038602	2310026L22Rik	chr4	+	138215714	138216189	400	lincRNA	RIKEN_cDNA_2310026L22_gene	24	28	23	32	12	31	30	41	27	46	32	42	25	49	2.98465	2.85566	2.31607	3.77613	1.70656	3.45657	2.86856	4.2065	3.24182	4.9859
ENSMUSG00000038241	3116.56	2835.79	2765.22	3443.13	2946.9	3270.13	3611.15	4942.88	5218.23	3853.11	4155.12	5182.05	4280.35	4305.23	-0.51782	1.2634e-13	3.3773e-12	Cep250	chr2	+	155956458	155998900	7979	protein_coding	centrosomal_protein_250	2981	3283	3248	3418	2438	3427	4535	5381	4734	3938	3553	5410	3570	4311	18.5847	16.7854	16.3965	20.22	17.3815	19.1562	21.7386	27.6765	28.4947	21.398
ENSMUSG00000100387	5.22738	17.2756	20.4327	19.1397	18.131	9.54225	21.4997	22.0459	26.4549	16.6335	42.1008	49.809	17.9847	29.9598	-0.5172	0.0038056	0.016522	RP23-466H15.2	chr7	+	35838260	35839570	450	lincRNA	predicted_gene_28514	5	20	24	19	15	10	27	24	24	17	36	52	15	30	0.552712	1.81312	2.14824	1.99296	1.89618	0.99113	2.29484	2.18875	2.56143	1.63788
ENSMUSG00000029049	296.915	269.5	246.895	254.86	253.834	269.092	267.551	423.466	472.882	335.606	353.179	346.747	330.918	449.397	-0.51684	3.1942e-10	5.8863e-09	Morn1	chr4	+	155086577	155145505	2707	protein_coding	MORN_repeat_containing_1	284	312	290	253	210	282	336	461	429	343	302	362	276	450	5.21881	4.70192	4.31513	4.41153	4.41298	4.64627	4.74737	6.98891	7.61121	5.49353
ENSMUSG00000048029	97.2293	95.0158	85.1361	101.742	100.325	118.324	109.887	171.775	165.343	140.896	155.539	149.427	118.699	138.814	-0.51655	8.4726e-08	1.1063e-06	Eno4	chr19	+	58943425	58971419	2568	protein_coding	enolase_4	93	110	100	101	83	124	138	187	150	144	133	156	99	139	1.80148	1.74746	1.56852	1.85645	1.83859	2.15362	2.05535	2.98843	2.80531	2.43116
ENSMUSG00000024842	3210.66	2859.98	3491.43	3350.45	3355.45	3631.78	3181.15	4785.81	4300.03	5003.75	4556.24	4852.55	5125.63	4607.82	-0.51635	7.5722e-26	4.5643e-24	Cabp4	chr19	-	4135425	4139609	1431	protein_coding	calcium_binding_protein_4	3071	3311	4101	3326	2776	3806	3995	5210	3901	5114	3896	5066	4275	4614	106.753	94.3905	115.434	109.708	110.352	118.624	106.777	149.415	130.924	154.941
ENSMUSG00000046814	1.04548	6.04646	10.2163	11.0809	13.2961	12.4049	15.1294	22.0459	18.7389	16.6335	12.8641	25.8624	13.1888	20.9719	-0.51538	0.0042838	0.018267	Gchfr	chr2	+	119167773	119172390	645	protein_coding	GTP_cyclohydrolase_I_feedback_regulator	1	7	12	11	11	13	19	24	17	17	11	27	11	21	0.0771227	0.442738	0.749387	0.804988	0.97014	0.898932	1.12667	1.52703	1.26582	1.14271
ENSMUSG00000038115	1650.81	1809.62	1903.64	1832.37	1733.33	1977.15	1618.85	2504.97	2547.39	2550.8	2750.59	2644.67	2580.2	2431.74	-0.51536	1.6829e-30	1.2888e-28	Ano2	chr6	+	125690419	126040126	3925	protein_coding	anoctamin_2	1579	2095	2236	1819	1434	2072	2033	2727	2311	2607	2352	2761	2152	2435	20.0117	21.7748	22.9465	21.8751	20.7831	23.5447	19.8107	28.513	28.2777	28.797
ENSMUSG00000054792	7470.97	7002.67	7165.05	7296.25	7424.05	7484.94	7459.59	10885.2	10886.2	10073.1	10121.7	10493.4	10362.8	10637.7	-0.51536	4.4614e-82	1.5438e-79	Klhl18	chr9	-	110425928	110476694	4638	protein_coding	kelch-like_18	7146	8107	8416	7243	6142	7844	9368	11850	9876	10295	8655	10955	8643	10652	76.6433	71.308	73.0903	73.713	75.3322	75.4311	77.2535	104.854	102.267	96.2368
ENSMUSG00000025437	5865.12	5768.33	5963.78	6508.5	5644.8	5986.81	5809.69	8344.39	9582.19	8453.74	8668.09	8583.43	8421.62	7637.76	-0.51527	2.9309e-33	2.5834e-31	Usp33	chr3	+	152346478	152393612	4165	protein_coding	ubiquitin_specific_peptidase_33	5610	6678	7005	6461	4670	6274	7296	9084	8693	8640	7412	8961	7024	7648	67.0023	65.4094	67.7451	73.222	63.7827	67.1851	66.9995	89.5074	100.24	89.9383
ENSMUSG00000087625	36.5917	44.9166	63.8521	72.5293	37.4708	54.3908	47.777	84.5094	93.6945	46.9652	72.507	135.059	61.1479	77.8956	-0.5135	0.0009621	0.0051336	4930419G24Rik	chr3	+	33024777	33088607	1058	antisense	RIKEN_cDNA_4930419G24_gene	35	52	75	72	31	57	60	92	85	48	62	141	51	78	1.6456	2.00506	2.85536	3.21221	1.66678	2.40288	2.16904	3.56861	3.85849	1.96699
ENSMUSG00000010538	9.40928	14.6843	17.8786	15.1103	12.0874	13.3592	9.55541	29.3946	23.1481	22.5042	14.0336	17.2416	17.9847	33.9545	-0.51345	0.0030123	0.013606	Tsacc	chr3	-	88282757	88296999	600	protein_coding	TSSK6_activating_co-chaperone	9	17	21	15	10	14	12	32	21	23	12	18	15	34	0.746162	1.15586	1.40978	1.18004	0.948091	1.04069	0.764948	2.18875	1.68094	1.66197
ENSMUSG00000096740	4109.77	3772.13	4189.55	3824.91	3829.27	4321.69	3674.05	5684.18	6058.18	5780.64	5551.46	5585.31	5426.57	5642.43	-0.51325	2.7635e-39	3.0556e-37	Gm21743	chr19	+	8883732	8892627	3164	protein_coding	LBH_domain_containing_1	3931	4367	4921	3797	3168	4529	4614	6188	5496	5908	4747	5831	4526	5650	61.8028	56.3061	62.6472	56.6449	56.9574	63.8424	55.7755	80.2622	83.4247	80.9561
ENSMUSG00000071237	1.04548	2.59134	3.40544	7.05146	2.41747	1.90845	1.59257	4.5929	5.51144	7.82754	5.84734	9.57865	9.59182	9.98661	-0.51313	0.0036126	0.015802	Gm6253	chr6	+	117808720	117809220	501	pseudogene	predicted_pseudogene_6253	1	3	4	7	2	2	2	5	5	8	5	10	8	10	0.0992897	0.244283	0.321593	0.659503	0.227088	0.178047	0.152684	0.409571	0.47931	0.692306
ENSMUSG00000042225	681.65	680.659	817.307	836.102	763.921	832.084	738.951	1070.15	1097.88	1011.71	1121.52	1125.49	1121.04	1148.46	-0.51293	2.76e-22	1.3258e-20	Ammecr1	chrX	-	142851146	142966728	5437	protein_coding	Alport_syndrome_mental_retardation_midface_hypoplasia_and_elliptocytosis_chromosomal_region_gene_1	652	788	960	830	632	872	928	1165	996	1034	959	1175	935	1150	5.96527	5.91256	7.11208	7.20569	6.6124	7.1532	6.52816	8.79354	8.79801	8.24531
ENSMUSG00000087278	1104.02	1141.05	1013.97	1007.35	985.12	1166.06	1095.69	1740.71	1635.8	1535.18	1382.31	1454.04	1426.78	1638.8	-0.51291	2.0106e-20	8.7575e-19	A930006I01Rik	chr2	-	103338601	103372764	2229	lincRNA	RIKEN_cDNA_A930006I01_gene	1056	1321	1191	1000	815	1222	1376	1895	1484	1569	1182	1518	1190	1641	23.5665	24.177	21.5222	21.1761	20.7993	24.4514	23.6108	34.8896	31.9748	30.5182
ENSMUSG00000032292	9878.7	9221.72	11905.4	11209.8	11527.7	12634.9	10039.5	15430.3	13680.5	16822.4	16773.7	16506.9	17466.7	13785.5	-0.51284	2.3674e-14	6.7127e-13	Nr2e3	chr9	-	59942771	59960659	2686	protein_coding	nuclear_receptor_subfamily_2_group_E_member_3	9449	10676	13984	11128	9537	13241	12608	16798	12411	17193	14343	17233	14568	13804	174.993	162.148	209.706	195.554	201.979	219.866	179.532	256.654	221.914	277.518
ENSMUSG00000029524	982.747	863.78	1068.46	1165.51	981.493	991.44	1040.74	1568.02	1511.24	1244.58	1486.39	1445.42	1581.45	1394.13	-0.51279	2.6506e-17	9.4761e-16	Sirt4	chr5	-	115478010	115484725	1794	protein_coding	sirtuin_4	940	1000	1255	1157	812	1039	1307	1707	1371	1272	1271	1509	1319	1396	26.0644	22.7398	28.1777	30.4416	25.7475	25.8307	27.8648	39.0488	36.7028	30.7405
ENSMUSG00000091665	21.955	29.3685	27.2436	38.2793	27.8009	40.0775	35.8328	38.5804	72.751	30.3317	60.8123	55.5562	59.9489	37.9491	-0.51274	0.0010229	0.0054056	Gm17101	chr1	+	5063060	5064647	1588	pseudogene	predicted_gene_17101	21	34	32	38	23	42	45	42	66	31	52	58	50	38	0.657825	0.873448	0.811678	1.12951	0.823908	1.17962	1.08384	1.08541	1.99608	0.846364
ENSMUSG00000097021	102.457	101.926	120.042	94.691	89.4464	122.141	89.9801	140.543	177.468	121.327	161.386	123.565	158.265	189.746	-0.51258	1.9773e-06	2.0312e-05	4933433G15Rik	chr9	+	75410184	75417709	1481	lincRNA	RIKEN_cDNA_4933433G15_gene	98	118	141	94	74	128	113	153	161	124	138	129	132	190	3.29164	3.25039	3.83485	2.99591	2.84235	3.85477	2.91827	4.23968	5.22102	3.63005
ENSMUSG00000061288	3230.52	3234.86	2514.07	3071.41	2994.04	2835.96	3333.24	5201.01	5313.03	3442.16	4290.78	4263.46	3878.69	4634.79	-0.51175	1.7981e-08	2.5708e-07	Taok3	chr5	+	117120129	117275219	4467	protein_coding	TAO_kinase_3	3090	3745	2953	3049	2477	2972	4186	5662	4820	3518	3669	4451	3235	4641	34.41	34.2015	26.6276	32.218	31.5436	29.674	35.8414	52.0177	51.8222	34.1449
ENSMUSG00000074037	116.048	114.883	106.42	113.831	137.796	104.965	80.4247	166.263	164.241	162.421	168.403	141.764	143.877	181.756	-0.51168	1.388e-07	1.7573e-06	Mc1r	chr8	+	123407082	123410742	3661	protein_coding	melanocortin_1_receptor	111	133	125	113	114	110	101	181	149	166	144	148	120	182	1.50822	1.48204	1.37529	1.45692	1.77136	1.3401	1.05517	2.02897	1.95466	1.96587
ENSMUSG00000021009	2187.14	2117.13	2106.27	2410.59	2150.34	2231.93	2167.48	2934.87	3283.72	3237.67	3157.56	2981.83	3202.47	3199.71	-0.51156	1.2552e-42	1.5955e-40	Ptpn21	chr12	-	98676741	98737405	5697	protein_coding	protein_tyrosine_phosphatase_non-receptor_type_21	2092	2451	2474	2393	1779	2339	2722	3195	2979	3309	2700	3113	2671	3204	18.2666	17.5512	17.4919	19.8268	17.7636	18.3116	18.2744	23.0156	25.1136	25.1824
ENSMUSG00000086914	55.4102	38.8701	33.2031	33.2426	39.8883	37.2148	52.5547	57.8706	72.751	54.7928	51.4566	57.4719	70.7397	79.8929	-0.51105	0.00016362	0.0010947	Gm16124	chr9	+	53667246	53681265	516	antisense	predicted_gene_16124	53	45	39	33	33	39	66	63	66	56	44	60	59	80	5.10938	3.55772	3.04438	3.01871	3.63802	3.371	4.89211	5.01058	6.14297	4.70526
ENSMUSG00000054580	4289.59	4002.76	3678.73	4399.1	3760.38	4025.88	3873.13	5278.17	6615.94	5526.24	5377.21	5258.68	5535.68	6725.98	-0.51013	9.0575e-18	3.3648e-16	Pla2r1	chr2	-	60417543	60553308	7112	protein_coding	phospholipase_A2_receptor_1	4103	4634	4321	4367	3111	4219	4864	5746	6002	5648	4598	5490	4617	6735	28.698	26.5811	24.4724	28.9833	24.8834	26.4582	26.158	33.1567	40.5311	34.4309
ENSMUSG00000097890	26.1369	25.9134	24.6895	28.2058	21.7572	20.0387	16.722	39.499	18.7389	25.4395	65.4902	34.4832	38.3673	49.9331	-0.50993	0.0023012	0.010839	4930547M16Rik	chr10	+	39899329	39907931	2400	lincRNA	RIKEN_cDNA_4930547M16_gene	25	30	29	28	18	21	21	43	17	26	56	36	32	50	0.518168	0.50994	0.486711	0.550685	0.426641	0.390258	0.334665	0.735282	0.34019	0.469686
ENSMUSG00000062859	402.508	432.754	380.558	425.102	432.727	421.768	490.511	687.099	641.532	548.906	575.378	619.739	598.29	625.162	-0.50936	9.487e-17	3.2349e-15	Tcp11	chr17	-	28066747	28080639	1984	protein_coding	t-complex_protein_11	385	501	447	422	358	442	616	748	582	561	492	647	499	626	9.65297	10.3016	9.07508	10.0399	10.2646	9.93628	11.8752	15.4724	14.0885	12.2593
ENSMUSG00000020672	596.967	589.098	526.141	641.683	576.567	581.123	552.621	840.502	847.66	855.159	780.035	918.593	805.713	769.968	-0.50933	1.3698e-22	6.7007e-21	Sntg2	chr12	-	30174482	30373375	2411	protein_coding	syntrophin_gamma_2	571	682	618	637	477	609	694	915	769	874	667	959	672	771	11.781	11.5397	10.3247	12.4709	11.2544	11.2658	11.0094	15.5747	15.3184	15.7166
ENSMUSG00000031789	18910.6	17967.5	20175.6	20369.7	20282.6	21551.2	19538.4	27500.5	27987.1	28389.5	28504.6	29338.5	29046.4	27429.2	-0.50905	1.7755e-46	2.6331e-44	Cngb1	chr8	-	95239045	95306585	6189	protein_coding	cyclic_nucleotide_gated_channel_beta_1	18088	20801	23698	20221	16780	22585	24537	29938	25390	29015	24374	30629	24226	27466	145.382	137.111	154.232	154.219	154.231	162.758	151.636	198.518	197.027	203.258
ENSMUSG00000054150	1767.9	1686.96	1567.36	1840.43	1581.03	1776.77	1805.97	2536.2	2552.9	2134.96	2474.59	2561.33	2590.99	2376.81	-0.50849	1.6032e-25	9.3908e-24	Syne3	chr12	-	104929949	105009809	5436	protein_coding	spectrin_repeat_containing_nuclear_envelope_family_member_3	1691	1953	1841	1827	1308	1862	2268	2761	2316	2182	2116	2674	2161	2380	15.4741	14.6565	13.6414	15.8641	13.6877	15.2772	15.9575	20.8441	20.4618	17.4029
ENSMUSG00000006784	208.05	211.626	224.759	223.632	209.111	243.327	247.644	362.839	342.812	251.46	294.706	350.579	309.336	362.514	-0.5076	3.0842e-10	5.7004e-09	Ttc25	chr11	+	100545607	100572568	4340	protein_coding	tetratricopeptide_repeat_domain_25	199	245	264	222	173	255	311	395	311	257	252	366	258	363	2.28089	2.30295	2.45018	2.41446	2.26755	2.62056	2.74077	3.73512	3.44156	2.56737
ENSMUSG00000043418	4269.72	4208.34	4634.81	4532.07	4521.88	4930.48	4271.27	6196.75	6710.73	6879.43	6097.6	6343.94	6365.37	6183.71	-0.50743	2.3192e-37	2.3681e-35	Lrit2	chr14	+	37068049	37073735	2781	protein_coding	leucine-rich_repeat_immunoglobulin-like_and_transmembrane_domains_2	4084	4872	5444	4499	3741	5167	5364	6746	6088	7031	5214	6623	5309	6192	73.0511	71.4686	78.85	76.361	76.5223	82.8668	73.7717	99.5503	105.138	109.613
ENSMUSG00000048154	9325.64	8264.65	8683.88	10227.6	8542.13	8645.28	10344.5	12827.1	15835.5	10373.4	13040.7	14982	12483.8	12788.9	-0.50661	1.5353e-12	3.6733e-11	Kmt2d	chr15	-	98831669	98871204	19823	protein_coding	lysine_(K)-specific_methyltransferase_2D	8920	9568	10200	10153	7067	9060	12991	13964	14366	10602	11151	15641	10412	12806	22.384	19.6907	20.726	24.1758	20.28	20.3846	25.0654	28.9093	34.8057	23.188
ENSMUSG00000040694	153.685	138.205	141.326	175.279	172.849	172.715	147.313	222.297	211.639	242.654	223.368	227.972	225.408	229.692	-0.50659	3.1013e-11	6.4246e-10	Apobec2	chr17	-	48419231	48432728	1218	protein_coding	apolipoprotein_B_mRNA_editing_enzyme_catalytic_polypeptide_2	147	160	166	174	143	181	185	242	192	248	191	238	188	230	6.0036	5.35897	5.48966	6.74308	6.67867	6.62788	5.80934	8.15389	7.57074	8.82775
ENSMUSG00000027811	96.1838	127.84	94.5011	106.779	116.039	115.461	120.239	178.205	145.502	212.322	149.692	151.343	152.27	147.802	-0.50592	4.098e-07	4.7949e-06	4930579G24Rik	chr3	+	79629079	79632817	1967	protein_coding	RIKEN_cDNA_4930579G24_gene	92	148	111	106	96	121	151	194	132	217	128	158	127	148	2.32662	3.06949	2.27302	2.54365	2.77631	2.74362	2.93613	4.04757	3.22295	4.78301
ENSMUSG00000043621	146.367	112.291	153.245	142.037	178.893	149.813	117.85	198.413	188.491	201.559	194.132	189.657	230.204	251.663	-0.50545	1.4262e-07	1.8031e-06	Ubxn10	chr4	-	138709837	138737167	3304	protein_coding	UBX_domain_protein_10	140	130	180	141	148	157	148	216	171	206	166	198	192	252	2.1078	1.60514	2.19441	2.01435	2.54814	2.11935	1.71326	2.68294	2.48565	2.70317
ENSMUSG00000056215	98.2747	121.793	72.3657	88.6469	96.6988	108.782	107.498	141.461	136.684	115.456	173.081	133.143	166.658	160.784	-0.50543	3.0043e-06	2.9957e-05	Lrguk	chr6	+	34029448	34134034	3058	protein_coding	leucine-rich_repeats_and_guanylate_kinase_domain_containing	94	141	85	88	80	114	135	154	124	118	148	139	139	161	1.52909	1.88101	1.11961	1.35832	1.48817	1.66269	1.68849	2.06671	1.94746	1.67298
ENSMUSG00000085151	193.413	181.394	181.34	203.485	193.398	182.257	194.293	279.249	341.709	288.641	257.283	253.834	260.178	238.68	-0.50538	7.5127e-11	1.4777e-09	1110018N20Rik	chr2	+	167188702	167192808	1162	processed_transcript	RIKEN_cDNA_1110018N20_gene	185	210	213	202	160	191	244	304	310	295	220	265	217	239	7.91968	7.37262	7.38343	8.20544	7.83277	7.33112	8.0313	10.7365	12.8127	11.0068
ENSMUSG00000000320	8.36381	1.72756	3.40544	5.03676	2.41747	2.86268	7.96284	12.8601	13.2275	11.7413	5.84734	7.66292	13.1888	6.99063	-0.50431	0.0052615	0.021723	Alox12	chr11	-	70241457	70255353	3001	protein_coding	arachidonate_12-lipoxygenase	8	2	4	5	2	3	10	14	12	12	5	8	11	7	0.132607	0.0271877	0.0536882	0.0786431	0.037911	0.044586	0.127449	0.191452	0.192044	0.173365
ENSMUSG00000085261	26.1369	23.3221	12.7704	15.1103	22.966	26.7183	17.5182	35.8247	45.1938	25.4395	33.9145	12.4523	46.7601	46.9371	-0.50413	0.0035432	0.015578	Gm13814	chr2	+	92483926	92529809	3077	lincRNA	predicted_gene_13814	25	27	15	15	19	28	22	39	41	26	29	13	39	47	0.404161	0.357969	0.196358	0.230102	0.351259	0.405858	0.273462	0.520157	0.639942	0.366346
ENSMUSG00000086502	253.005	210.762	198.367	231.691	206.694	190.845	216.589	282.004	457.45	244.611	312.248	259.582	335.714	323.566	-0.50371	1.2422e-06	1.3301e-05	B130055M24Rik	chr7	+	127448636	127460360	1778	processed_transcript	RIKEN_cDNA_B130055M24_gene	242	244	233	230	171	200	272	307	415	250	267	271	280	324	6.77057	5.59844	5.27848	6.10594	5.47099	5.01697	5.85112	7.08604	11.2099	6.09613
ENSMUSG00000100783	17.7731	25.0496	22.1354	19.1397	19.3398	26.7183	30.2588	37.6618	35.2732	23.4826	31.5756	39.2725	40.7652	47.9357	-0.50327	0.0011487	0.0059771	RP23-408A1.1	chr5	+	149231332	149237984	735	lincRNA	RIKEN_cDNA_2310047D07_gene	17	29	26	19	16	28	38	41	32	24	27	41	34	48	1.15054	1.60961	1.42485	1.22018	1.23832	1.69908	1.97742	2.28925	2.09097	1.41569
ENSMUSG00000010362	221.641	222.855	252.003	205.5	203.068	250.961	236.496	379.374	273.368	317.015	314.587	328.548	372.882	315.577	-0.50319	6.4943e-11	1.2924e-09	Rdm1	chr11	+	101627195	101636100	1124	protein_coding	RAD52_motif_1	212	258	296	204	168	263	297	413	248	324	269	343	311	316	9.38234	9.36402	10.6074	8.56684	8.50245	10.436	10.1063	15.0793	10.5967	12.4975
ENSMUSG00000091381	1.04548	6.91024	1.70272	2.0147	1.20874	0	1.59257	10.1044	18.7389	2.93533	5.84734	7.66292	2.39796	7.98929	-0.50259	0.0021248	0.010131	Vmn2r83	chr10	+	79468943	79492154	2610	protein_coding	vomeronasal_2_receptor_83	1	8	2	2	1	0	2	11	17	3	5	8	2	8	0.0190591	0.125043	0.0308656	0.0361698	0.0217952	0	0.0293084	0.172961	0.312819	0.0498341
ENSMUSG00000038677	153.685	167.573	162.61	185.353	175.267	168.898	224.552	255.366	279.981	172.206	188.284	288.317	487.984	282.621	-0.50224	0.0011438	0.0059587	Scube3	chr17	+	28142316	28174852	6699	protein_coding	signal_peptide_CUB_domain_EGF-like_3	147	194	191	184	145	177	282	278	254	176	161	301	407	283	1.09156	1.18141	1.14844	1.29648	1.23129	1.17844	1.61006	1.70307	1.82099	1.13906
ENSMUSG00000056752	723.469	693.616	486.127	697.087	592.28	678.454	568.547	867.14	1233.46	821.892	801.085	867.826	809.31	1165.44	-0.50214	1.1524e-05	0.00010238	Dnah9	chr11	-	65831282	66168551	13798	protein_coding	dynein_axonemal_heavy_chain_9	692	803	571	692	490	711	714	944	1119	840	685	906	675	1167	2.49478	2.37415	1.66688	2.36726	2.02014	2.29825	1.97917	2.80771	3.89492	2.63942
ENSMUSG00000097430	140.094	152.889	160.056	201.47	109.995	158.401	183.145	234.238	266.754	210.365	189.454	242.34	225.408	251.663	-0.50166	4.4445e-07	5.1616e-06	Gm10544	chr18	-	37159855	37178522	2238	lincRNA	predicted_gene_10544	134	177	188	200	91	166	230	255	242	215	162	253	188	252	2.97842	3.22643	3.38363	4.21819	2.31304	3.3082	3.9307	4.67603	5.19326	4.16509
ENSMUSG00000097855	180.867	209.035	161.759	230.683	129.335	166.989	232.515	273.737	325.175	238.74	223.368	282.57	266.173	319.572	-0.50056	2.7944e-06	2.7967e-05	A930007I19Rik	chr19	-	29486355	29523159	2319	lincRNA	RIKEN_cDNA_A930007I19_gene	173	242	190	229	107	175	292	298	295	244	191	295	222	320	3.71097	4.25719	3.30018	4.66113	2.62473	3.36574	4.81597	5.27366	6.1095	4.56178
ENSMUSG00000096351	7262.92	6113.84	6380.95	7150.18	6750.79	6407.62	6277.9	10636.2	10122.3	8834.36	9091.44	9634.21	9138.61	8523.57	-0.49977	1.0648e-22	5.2361e-21	Samd11	chr4	-	156246973	156255338	2603	protein_coding	sterile_alpha_motif_domain_containing_11	6947	7078	7495	7098	5585	6715	7884	11579	9183	9029	7774	10058	7622	8535	132.759	110.929	115.98	128.712	122.054	115.058	115.844	182.555	169.432	150.387
ENSMUSG00000032743	4605.32	4445.01	4622.89	4813.12	4866.37	4704.33	4651.89	6941.72	6916.86	6519.36	6404	6756.78	6565.6	6232.64	-0.49935	6.4777e-58	1.3157e-55	D430042O09Rik	chr7	+	125707915	125874793	6148	protein_coding	RIKEN_cDNA_D430042O09_gene	4405	5146	5430	4778	4026	4930	5842	7557	6275	6663	5476	7054	5476	6241	35.6413	34.1464	35.5755	36.6833	37.2513	35.7648	36.3438	50.4444	49.019	46.9874
ENSMUSG00000071647	4458.95	3900.83	4307.89	4643.89	4546.05	4244.39	4378.77	6745.14	6220.21	6064.39	5719.86	6488.58	6259.86	5789.24	-0.49934	9.0081e-31	6.9556e-29	Eml3	chr19	+	8929694	8941563	3161	protein_coding	echinoderm_microtubule_associated_protein_like_3	4265	4516	5060	4610	3761	4448	5499	7343	5643	6198	4891	6774	5221	5797	67.1176	58.2825	64.4779	68.8388	67.6831	62.7601	66.5367	95.3336	85.7373	85.0105
ENSMUSG00000097419	129.639	139.932	97.9065	69.5072	76.1503	69.6584	82.8135	267.307	164.241	67.5125	112.269	206.899	154.668	180.758	-0.49911	0.0045087	0.019048	Gm26666	chr6	+	145047559	145050430	2461	lincRNA	predicted_gene_26666	124	162	115	69	63	73	104	291	149	69	96	216	129	181	2.50641	2.68542	1.88222	1.32341	1.45623	1.32298	1.61631	4.85264	2.90776	1.21558
ENSMUSG00000049799	7.31833	12.0929	11.0677	13.0956	12.0874	9.54225	12.7405	13.7787	15.432	19.5689	15.2031	17.2416	29.9744	23.9679	-0.49887	0.0042887	0.018284	Lrrc19	chr4	-	94636653	94650144	2820	protein_coding	leucine_rich_repeat_containing_19	7	14	13	13	10	10	16	15	14	20	13	18	25	24	0.123478	0.202529	0.185686	0.217596	0.201722	0.158159	0.217007	0.218293	0.238431	0.307487
ENSMUSG00000056682	16.7276	8.6378	6.81089	24.1764	8.46115	15.2676	8.75912	26.6388	27.5572	25.4395	15.2031	16.2837	28.7755	16.9772	-0.49875	0.005106	0.021155	4930465K10Rik	chr18	+	77714210	77715449	1238	pseudogene	RIKEN_cDNA_4930465K10_gene	16	10	8	24	7	16	11	29	25	26	13	17	24	17	0.642897	0.329525	0.260288	0.915055	0.321646	0.576425	0.33984	0.961334	0.969848	0.910539
ENSMUSG00000032463	1380.03	1584.17	1427.73	1529.16	1489.16	1620.27	1438.09	2189.9	1967.58	2185.84	2094.52	2128.38	2153.36	2133.14	-0.49869	3.6723e-35	3.5011e-33	Faim	chr9	+	98986373	99002021	4262	protein_coding	Fas_apoptotic_inhibitory_molecule	1320	1834	1677	1518	1232	1698	1806	2384	1785	2234	1791	2222	1796	2136	15.4064	17.5548	15.8491	16.8118	16.4437	17.7692	16.2071	22.9557	20.1145	22.7256
ENSMUSG00000087466	41.819	27.641	17.8786	35.2573	26.5922	23.8556	33.4439	55.1149	66.1373	45.9868	33.9145	30.6517	47.9591	45.9384	-0.49867	0.0014554	0.007338	A330041J22Rik	chr9	+	86695460	86701253	1825	antisense	RIKEN_cDNA_A330041J22_gene	40	32	21	35	22	25	42	60	60	47	29	32	40	46	1.09028	0.715313	0.463491	0.905236	0.685743	0.610971	0.880214	1.34923	1.57897	1.11656
ENSMUSG00000002204	33.4552	30.2323	28.9463	33.2426	25.3834	25.7641	33.4439	41.3361	42.9892	44.0299	50.2871	39.2725	53.954	49.9331	-0.49817	0.00028245	0.0017616	Napsa	chr7	+	44572432	44586862	1508	protein_coding	napsin_A_aspartic_peptidase	32	35	34	33	21	27	42	45	39	45	43	41	45	50	1.05558	0.946838	0.908159	1.03293	0.792172	0.798557	1.06525	1.22464	1.24207	1.29377
ENSMUSG00000035403	2432.82	2460.91	2583.88	2777.27	2879.21	2541.1	2682.68	4030.73	3875.65	3483.26	3469.81	3795.06	3646.09	3741.98	-0.49772	2.6602e-29	1.8829e-27	Crb2	chr2	+	37776249	37799103	6372	protein_coding	crumbs_homolog_2_(Drosophila)	2327	2849	3035	2757	2382	2663	3369	4388	3516	3560	2967	3962	3041	3747	18.1661	18.24	19.1853	20.4229	21.2651	18.6397	20.2221	28.261	26.5007	24.2226
ENSMUSG00000087020	12.5457	6.91024	5.10817	8.05881	12.0874	8.58803	7.16656	16.5345	17.6366	9.78443	12.8641	20.1152	11.9898	17.9759	-0.49764	0.0055209	0.0225	Gm16283	chr18	+	49755794	49757189	522	processed_transcript	predicted_gene_16283	12	8	6	8	10	9	9	18	16	10	11	21	10	18	1.14354	0.625214	0.462983	0.723396	1.08976	0.768981	0.659438	1.41514	1.47209	0.830568
ENSMUSG00000074579	172.504	167.573	177.934	165.206	177.684	182.257	187.127	304.969	296.516	225.042	218.69	263.413	218.214	243.673	-0.49756	3.3064e-09	5.2762e-08	Lekr1	chr3	+	65666228	65831159	2461	protein_coding	leucine_glutamate_and_lysine_rich_1	165	194	209	164	147	191	235	332	269	230	187	275	182	244	3.33514	3.21587	3.42073	3.14549	3.39787	3.46151	3.65223	5.53635	5.24959	4.05193
ENSMUSG00000096553	214.323	235.812	192.408	219.603	174.058	232.831	281.088	304.05	380.29	272.985	332.129	326.632	279.362	356.522	-0.49714	6.2158e-08	8.255e-07	Gm10097	chr10	+	5069192	5071975	2784	protein_coding	predicted_gene_10097	205	273	226	218	144	244	353	331	345	279	284	341	233	357	3.66291	4.00039	3.26982	3.6961	2.94235	3.90898	4.84962	4.87928	5.95161	4.34491
ENSMUSG00000017561	1370.62	1488.29	1373.25	1511.03	1445.65	1233.81	1485.87	2242.26	2183.63	1874.7	1906.23	1949.26	2040.66	1892.46	-0.49711	1.9719e-21	9.0534e-20	Crlf3	chr11	-	80046493	80080991	2396	protein_coding	cytokine_receptor-like_factor_3	1311	1723	1613	1500	1196	1293	1866	2441	1981	1916	1630	2035	1702	1895	27.2181	29.3364	27.1164	29.5502	28.3953	24.0688	29.787	41.8098	39.7084	34.67
ENSMUSG00000086342	30.3188	26.7772	25.5408	25.1838	26.5922	22.9014	23.0922	41.3361	39.6824	34.2455	40.9314	36.3989	38.3673	43.9411	-0.49671	0.00047745	0.0028029	Gm12932	chr4	-	125082857	125084947	620	antisense	predicted_gene_12932	29	31	30	25	22	24	29	45	36	35	35	38	32	44	2.32674	2.03976	1.94901	1.90329	2.01852	1.72649	1.78899	2.97864	2.78866	2.4475
ENSMUSG00000094595	146.367	108.836	102.163	131.963	109.995	139.317	144.924	186.472	171.957	177.098	218.69	181.037	173.852	171.77	-0.49658	9.4041e-08	1.2203e-06	Fsbp	chr4	+	11579665	11587591	4358	protein_coding	fibrinogen_silencer_binding_protein	140	126	120	131	91	146	182	203	156	181	187	189	145	172	1.59802	1.17948	1.10912	1.41886	1.18783	1.4942	1.5973	1.91164	1.71918	1.80068
ENSMUSG00000020183	310.506	269.5	270.733	234.713	271.966	286.268	303.384	391.315	390.21	419.752	456.092	360.157	383.673	385.483	-0.49629	2.7344e-13	7.0866e-12	Cpm	chr10	+	117629500	117687352	5195	protein_coding	carboxypeptidase_M	297	312	318	233	225	300	381	426	354	429	390	376	320	386	2.84389	2.45007	2.46562	2.11703	2.46376	2.5756	2.80506	3.36528	3.27267	3.58028
ENSMUSG00000031142	8050.16	6920.61	7846.14	8944.27	7431.31	7821.78	8370.54	11903.9	12323.6	9900.86	10888.9	12316.2	10769.2	10676.7	-0.49608	6.4053e-19	2.5412e-17	Cacna1f	chrX	+	7607083	7635196	6622	protein_coding	calcium_channel_voltage-dependent_alpha_1F_subunit	7700	8012	9216	8879	6148	8197	10512	12959	11180	10119	9311	12858	8982	10691	57.842	49.3583	56.058	63.2895	52.8136	55.2089	60.7153	80.3118	81.0844	66.2513
ENSMUSG00000017692	861.472	769.628	789.212	751.484	913.804	789.144	879.894	1293.36	1173.94	1035.19	1169.47	1172.43	1170.2	1152.45	-0.49541	1.4372e-20	6.3191e-19	Rhbdl3	chr11	+	80300912	80355955	3736	protein_coding	rhomboid_veinlet-like_3_(Drosophila)	824	891	927	746	756	827	1105	1408	1065	1058	1000	1224	976	1154	10.9714	9.72926	9.99442	9.42516	11.5111	9.87284	11.3125	15.4665	13.6907	12.2779
ENSMUSG00000024295	79.4562	63.9198	77.4739	67.4925	55.6018	65.8415	76.4433	108.393	78.2625	91.9736	111.099	102.492	116.301	106.857	-0.49517	5.2379e-06	4.9936e-05	Cyp4f41-ps	chr17	-	32951744	32958695	1077	pseudogene	cytochrome_P450_family_4_subfamily_f_polypeptide_41_pseudogene	76	74	91	67	46	69	96	118	71	94	95	107	97	107	3.51026	2.80301	3.40338	2.9364	2.42965	2.85744	3.40924	4.49638	3.16612	3.78406
ENSMUSG00000014786	1349.71	1172.15	1449.87	1549.31	1352.58	1243.36	1414.2	2026.39	2120.8	1795.44	1875.83	2079.53	1967.52	1699.72	-0.49498	1.7423e-16	5.7828e-15	Slc9a5	chr8	+	105348258	105369881	5222	protein_coding	solute_carrier_family_9_(sodium/hydrogen_exchanger)_member_5	1291	1357	1703	1538	1119	1303	1776	2206	1924	1835	1604	2171	1641	1702	12.2979	10.6011	13.136	13.902	12.1897	11.1289	13.0079	17.3367	17.6951	15.2351
ENSMUSG00000037788	7509.65	7680.74	8425.92	8115.22	8245.99	8861.89	8095.82	11098.3	10963.4	12264.8	11335.6	11963.7	11694.8	11215	-0.49478	1.3231e-38	1.4291e-36	Vopp1	chr6	-	57727807	57825154	4590	protein_coding	vesicular_overexpressed_in_cancer_prosurvival_protein_1	7183	8892	9897	8056	6822	9287	10167	12082	9946	12535	9693	12490	9754	11230	77.8458	79.0307	86.8511	82.8444	84.5474	90.2415	84.7193	108.025	104.069	118.402
ENSMUSG00000030878	4212.22	4716.24	4311.29	4935.01	4768.46	4378.94	4170.94	6819.55	6467.13	7090.77	6068.37	5895.66	6029.66	6265.6	-0.49452	2.3757e-24	1.3019e-22	Cdr2	chr7	-	120957036	120982312	2525	protein_coding	cerebellar_degeneration-related_2	4029	5460	5064	4899	3945	4589	5238	7424	5867	7247	5189	6155	5029	6274	79.3739	88.2145	80.7824	91.5804	88.8765	81.0588	79.3426	120.663	111.594	124.435
ENSMUSG00000026094	358.598	308.37	238.381	254.86	229.66	291.993	320.902	449.186	402.335	388.442	377.738	420.503	396.862	444.404	-0.494	2.8293e-09	4.5497e-08	Stk17b	chr1	-	53755506	53785224	3293	protein_coding	serine/threonine_kinase_17b_(apoptosis-inducing)	343	357	280	253	190	306	403	489	365	397	323	439	331	445	5.18136	4.42268	3.42492	3.62648	3.28219	4.14451	4.68075	6.09416	5.32336	5.2269
ENSMUSG00000096917	49.1374	62.1922	51.933	58.4264	59.228	47.7113	55.7399	91.8581	87.0808	74.3616	70.168	69.9242	76.7346	93.8741	-0.49338	1.8045e-05	0.00015411	2500002B13Rik	chr8	+	57488054	57508877	2618	lincRNA	RIKEN_cDNA_2500002B13_gene	47	72	61	58	49	50	70	100	79	76	60	73	64	94	0.893038	1.12195	0.938523	1.04572	1.0647	0.851812	1.02266	1.56757	1.44925	1.25861
ENSMUSG00000086112	0	5.18268	4.25681	3.02205	4.83494	5.72535	6.37027	8.26723	13.2275	7.82754	5.84734	20.1152	7.19387	6.99063	-0.4933	0.0058363	0.023565	4930563I02Rik	chr14	+	60087071	60096093	971	protein_coding	RIKEN_cDNA_4930563I02_gene	0	6	5	3	4	6	8	9	12	8	5	21	6	7	0	0.252081	0.207413	0.145834	0.234338	0.275598	0.315118	0.380382	0.593535	0.357204
ENSMUSG00000062905	5.22738	8.6378	7.66225	8.05881	1.20874	2.86268	3.98142	12.8601	17.6366	13.6982	10.5252	12.4523	4.79591	7.98929	-0.49174	0.0067476	0.026561	Vmn1r32	chr6	-	66552183	66559708	2442	protein_coding	vomeronasal_1_receptor_32	5	10	9	8	1	3	5	14	16	14	9	13	4	8	0.101851	0.167056	0.14845	0.154633	0.0232946	0.0547922	0.0783117	0.235277	0.314672	0.248558
ENSMUSG00000097793	122.321	122.657	108.974	129.948	68.8979	130.729	110.683	160.752	159.832	180.033	139.167	177.205	161.862	176.763	-0.49162	1.2244e-06	1.3118e-05	Gm17259	chr13	-	81778773	81783749	4608	lincRNA	predicted_gene_17259	117	142	128	129	57	137	139	175	145	184	119	185	135	177	1.26303	1.25714	1.11888	1.3214	0.703661	1.32602	1.15373	1.55856	1.51126	1.73122
ENSMUSG00000050619	1152.11	1265.44	1232.77	1238.03	1202.69	1301.56	1262.91	1802.26	1835.31	1690.75	1723.79	1715.54	1762.5	1690.73	-0.49133	3.4901e-43	4.5606e-41	Zscan29	chr2	-	121158273	121171125	5072	protein_coding	zinc_finger_SCAN_domains_29	1102	1465	1448	1229	995	1364	1586	1962	1665	1728	1474	1791	1470	1693	10.808	11.7833	11.4994	11.4375	11.1595	11.9944	11.9599	15.8751	15.7659	14.771
ENSMUSG00000060467	9.40928	0.86378	5.10817	9.06616	2.41747	4.77113	7.96284	15.6159	9.9206	7.82754	10.5252	10.5365	10.7908	16.9772	-0.49036	0.006939	0.027177	Gm10080	chr9	-	44374595	44375209	613	pseudogene	predicted_gene_10080	9	1	6	9	2	5	10	17	9	8	9	11	9	17	0.730338	0.0665501	0.394253	0.693009	0.185597	0.363792	0.623938	1.13811	0.705126	0.565816
ENSMUSG00000020698	9.40928	8.6378	4.25681	8.05881	6.04368	9.54225	11.148	15.6159	17.6366	5.87066	16.3725	11.4944	13.1888	29.9598	-0.49028	0.0069784	0.027297	Cct6b	chr11	-	82719250	82764321	1871	protein_coding	chaperonin_containing_Tcp1_subunit_6b_(zeta)	9	10	5	8	5	10	14	17	16	6	14	12	11	30	0.239282	0.218039	0.107642	0.201824	0.152019	0.23838	0.286191	0.372883	0.410706	0.139035
ENSMUSG00000100002	14.6367	8.6378	3.40544	13.0956	19.3398	10.4965	15.9257	32.1503	28.6595	12.7198	23.3893	19.1573	28.7755	10.9853	-0.49004	0.0066603	0.026317	RP23-308G10.2	chr9	+	25152114	25175039	399	lincRNA	predicted_gene_29642	14	10	4	13	16	11	20	35	26	13	20	20	24	11	1.74541	1.02244	0.403805	1.5379	2.28112	1.2296	1.91716	3.59991	3.12957	1.41259
ENSMUSG00000018574	1128.07	892.285	1029.3	1250.12	1084.24	1079.23	1087.72	1706.72	1666.66	1470.6	1321.5	1551.74	1496.32	1495.99	-0.48971	1.1221e-14	3.2712e-13	Acadvl	chr11	-	70010183	70015411	2168	protein_coding	acyl-Coenzyme_A_dehydrogenase_very_long_chain	1079	1033	1209	1241	897	1131	1366	1858	1512	1503	1130	1620	1248	1498	24.7573	19.4379	22.4622	27.019	23.5361	23.2673	24.0987	35.1709	33.4948	30.057
ENSMUSG00000100954	18.8186	20.7307	28.0949	33.2426	30.2184	25.7641	21.4997	33.0689	35.2732	25.4395	44.4398	48.8511	45.5612	43.9411	-0.4894	0.0013876	0.0070346	RP24-167M10.2	chr1	-	151339604	151345231	2498	antisense	predicted_gene_10138	18	24	33	33	25	27	27	36	32	26	38	51	38	44	0.358444	0.391947	0.532116	0.62356	0.56931	0.482075	0.413403	0.591435	0.615236	0.45126
ENSMUSG00000050556	12846.8	13439.6	11696.9	15361.1	13204.2	12536.6	13407	18400.1	22116.3	17245	18033.2	18545.2	16899.6	19780.5	-0.48914	5.3651e-17	1.8774e-15	Kcnb1	chr2	-	167103378	167190155	3725	protein_coding	potassium_voltage_gated_channel_Shab-related_subfamily_member_1	12288	15559	13739	15249	10924	13138	16837	20031	20064	17625	15420	19361	14095	19807	164.096	170.398	148.564	193.229	166.823	157.306	172.878	220.685	258.688	205.139
ENSMUSG00000079022	19.864	29.3685	19.5813	22.1617	25.3834	20.0387	25.4811	42.2547	38.5801	42.073	23.3893	34.4832	34.7704	33.9545	-0.48818	0.0012721	0.0065301	Col22a1	chr15	-	71795795	72034227	8809	protein_coding	collagen_type_XXII_alpha_1	19	34	23	22	21	21	32	46	35	43	20	36	29	34	0.107292	0.157457	0.105169	0.117883	0.135611	0.106325	0.138939	0.214303	0.190821	0.211635
ENSMUSG00000097074	49.1374	56.1457	21.284	52.3823	31.4271	28.6268	59.7213	90.9395	67.2396	50.879	53.7955	78.545	62.3468	64.913	-0.488	0.0018754	0.0091187	4833428L15Rik	chr9	-	45416626	45431232	1259	lincRNA	RIKEN_cDNA_4833428L15_gene	47	65	25	52	26	30	75	99	61	52	46	82	52	65	1.85701	2.10618	0.799832	1.94955	1.17476	1.06277	2.27844	3.22706	2.32696	1.7907
ENSMUSG00000089735	4.1819	1.72756	3.40544	3.02205	1.20874	2.86268	7.16656	6.43007	5.51144	1.95689	7.0168	21.073	8.39284	16.9772	-0.48798	0.0045808	0.019292	Gm8428	chr6	-	8377596	8379379	1784	pseudogene	predicted_gene_8428	4	2	4	3	1	3	9	7	5	2	6	22	7	17	0.111534	0.0457345	0.0903129	0.0793749	0.0318865	0.0750015	0.192952	0.161028	0.134605	0.048605
ENSMUSG00000100252	20374.2	19249.3	19453.6	19828.7	17950.9	19162.8	21003.6	28823.2	28598.9	26472.7	25957.5	27902.6	26438.7	28650.6	-0.48787	3.3489e-40	3.7925e-38	RP23-137I13.1	chr3	+	17789921	17808970	3844	lincRNA	Mir124-2_host_gene_(non-protein_coding)	19488	22285	22850	19684	14851	20082	26377	31378	25945	27056	22196	29130	22051	28689	252.189	236.504	239.435	241.706	219.773	233.006	262.448	334.995	324.157	305.159
ENSMUSG00000056458	527.965	550.228	609.575	646.72	553.601	632.651	585.269	931.441	835.535	734.81	727.409	873.573	797.32	914.774	-0.48662	2.6291e-14	7.4211e-13	Mok	chr12	-	110807798	110840939	2829	protein_coding	MOK_protein_kinase	505	637	716	642	458	663	735	1014	758	751	622	912	665	916	8.87974	9.18577	10.1945	10.7117	9.20945	10.4526	9.93703	14.7096	12.8683	11.5094
ENSMUSG00000020593	1086.25	1206.7	1145.93	1156.44	1229.28	1185.15	1262.91	1721.42	1509.03	1709.34	1687.54	1720.33	1606.63	1684.74	-0.48633	1.3317e-31	1.0867e-29	Lpin1	chr12	-	16535669	16589770	5626	protein_coding	lipin_1	1039	1397	1346	1148	1017	1242	1586	1874	1369	1747	1443	1796	1340	1687	9.18666	10.1299	9.63673	9.63161	10.2831	9.84612	10.7822	13.6699	11.6866	13.4629
ENSMUSG00000097892	100.366	77.7402	75.7711	86.6322	93.0726	104.965	78.0358	131.357	122.354	126.219	111.099	127.396	125.893	137.815	-0.48616	6.3149e-07	7.1256e-06	Gm26801	chr1	-	177429047	177443270	1219	lincRNA	predicted_gene_26801	96	90	89	86	77	110	98	143	111	129	95	133	105	138	3.9175	3.01195	2.94084	3.33005	3.59326	4.02469	3.07485	4.81426	4.37324	4.58809
ENSMUSG00000025860	10427.6	10702.2	10643.7	11105	10218.7	10709.3	10136.7	13746.6	16548.7	15369.4	14141.2	14077.7	14163.5	15980.6	-0.48582	5.5406e-31	4.3318e-29	Xiap	chrX	+	42059679	42109656	6834	protein_coding	X-linked_inhibitor_of_apoptosis	9974	12390	12502	11024	8454	11223	12730	14965	15013	15708	12092	14697	11813	16002	72.5999	73.9614	73.6867	76.1414	70.3702	73.2449	71.2452	89.8667	105.506	99.6533
ENSMUSG00000030897	5.22738	26.7772	12.7704	15.1103	7.25241	8.58803	16.722	27.5574	15.432	25.4395	17.542	28.736	19.1836	31.9572	-0.48572	0.006683	0.026384	Cnga4	chr7	+	105404568	105408738	2480	protein_coding	cyclic_nucleotide_gated_channel_alpha_4	5	31	15	15	6	9	21	30	14	26	15	30	16	32	0.100291	0.50994	0.243626	0.285493	0.137626	0.161858	0.323869	0.49644	0.27112	0.454535
ENSMUSG00000041528	4492.41	4248.07	4484.12	4545.17	4613.74	4621.31	3680.42	6131.53	6236.75	6034.05	6013.4	5908.11	6166.34	6649.09	-0.48413	3.2142e-26	2.0291e-24	Rnf123	chr9	-	108051534	108083346	4727	protein_coding	ring_finger_protein_123	4297	4918	5267	4512	3817	4843	4622	6675	5658	6167	5142	6168	5143	6658	45.2191	42.4436	44.881	45.0547	45.9344	45.6954	37.3978	57.9512	57.486	56.5632
ENSMUSG00000085269	154.73	129.567	124.299	131.963	118.456	104.011	127.405	172.693	232.583	147.745	226.877	177.205	167.857	163.78	-0.48404	2.5001e-06	2.5321e-05	Gm15777	chr5	+	100670859	100678105	876	antisense	predicted_gene_15777	148	150	146	131	98	109	160	188	211	151	194	185	140	164	8.40426	6.98548	6.71326	7.05869	6.3639	5.54965	6.98583	8.80746	11.5681	7.47341
ENSMUSG00000085006	9.40928	19.0032	9.36497	4.02941	13.2961	11.4507	15.1294	40.4176	27.5572	16.6335	11.6947	9.57865	16.7857	33.9545	-0.48381	0.0077996	0.029884	BC021767	chr3	-	94661830	94670696	1716	pseudogene	cDNA_sequence_BC021767	9	22	11	4	11	12	19	44	25	17	10	10	14	34	0.260896	0.523015	0.258202	0.110027	0.36465	0.311894	0.423485	1.05228	0.699692	0.429514
ENSMUSG00000026672	2809.19	2866.02	2675.83	2765.18	2649.55	3018.21	2902.45	3955.41	4155.63	3798.31	4042.85	3977.06	3787.57	3908.76	-0.48378	2.6e-45	3.5988e-43	Optn	chr2	-	5020642	5064051	2614	protein_coding	optineurin	2687	3318	3143	2745	2192	3163	3645	4306	3770	3882	3457	4152	3159	3914	51.1333	51.7821	48.431	49.5671	47.702	53.9681	53.3328	67.6029	69.266	64.3866
ENSMUSG00000083534	1.04548	2.59134	3.40544	5.03676	6.04368	5.72535	3.98142	7.34865	6.61373	6.8491	11.6947	11.4944	7.19387	8.98795	-0.48369	0.0073732	0.028495	H2-M6-ps	chr17	-	36969195	36971396	1034	pseudogene	histocompatibility_2_M_region_locus_6_pseudogene	1	3	4	5	5	6	5	8	6	7	10	12	6	9	0.0481084	0.118361	0.15582	0.228248	0.275075	0.258806	0.184949	0.317517	0.278686	0.29351
ENSMUSG00000033177	36.5917	24.1859	40.8653	37.272	42.3057	34.3521	35.8328	59.7078	68.3419	49.9006	42.1008	44.0618	52.755	57.9223	-0.48334	0.00042911	0.0025504	Tmprss7	chr16	-	45656315	45693658	2587	protein_coding	transmembrane_serine_protease_7	35	28	48	37	35	36	45	65	62	51	36	46	44	58	0.672997	0.44154	0.747359	0.67509	0.769614	0.620654	0.665301	1.03113	1.15101	0.854711
ENSMUSG00000032087	4058.54	4020.9	4054.18	4862.48	4225.74	3961.94	4681.35	6069.98	6024.01	5475.36	6333.83	6426.32	5542.87	6162.74	-0.4832	3.4751e-21	1.5838e-19	Dscaml1	chr9	+	45430293	45753164	6336	protein_coding	Down_syndrome_cell_adhesion_molecule_like_1	3882	4655	4762	4827	3496	4152	5879	6608	5465	5596	5416	6709	4623	6171	30.4777	29.9718	30.2732	35.9599	31.3876	29.2271	35.4887	42.8008	41.4247	38.292
ENSMUSG00000020937	1658.12	1565.17	1723.15	1763.87	1839.7	1606.92	1693.7	2443.43	2631.16	2401.1	2174.04	2324.74	2347.6	2311.9	-0.48297	7.6239e-28	5.0698e-26	Plcd3	chr11	-	103070304	103101658	3023	protein_coding	phospholipase_C_delta_3	1586	1812	2024	1751	1522	1684	2127	2660	2387	2454	1859	2427	1958	2315	26.098	24.4528	26.9685	27.3404	28.6403	24.8455	26.9111	36.1111	37.9227	35.1951
ENSMUSG00000028950	92.0019	84.6505	85.9875	85.6249	80.9853	76.338	97.9429	147.892	114.638	121.327	109.93	121.649	121.097	129.826	-0.48243	6.1552e-07	6.9623e-06	Tas1r1	chr4	-	152027914	152038568	4698	protein_coding	taste_receptor_type_1_member_1	88	98	101	85	67	80	123	161	104	124	94	127	101	130	0.931776	0.850985	0.86595	0.854009	0.811266	0.759487	1.00137	1.4064	1.06318	1.14434
ENSMUSG00000086662	531.102	466.441	564.452	616.499	472.616	574.444	593.232	798.247	854.274	707.414	712.206	840.048	778.137	713.044	-0.48202	5.3216e-13	1.3348e-11	BC046251	chr7	+	65582031	65618884	5046	processed_transcript	cDNA_sequence_BC046251	508	540	663	612	391	602	745	869	775	723	609	877	649	714	5.00793	4.36572	5.29238	5.72481	4.40789	5.32099	5.64691	7.06756	7.37631	6.21208
ENSMUSG00000091305	17.7731	8.6378	21.284	13.0956	12.0874	11.4507	23.8885	33.0689	23.1481	15.6551	24.5588	35.441	14.3877	39.9464	-0.48121	0.006496	0.025793	Gm17100	chr1	-	4927028	4927299	272	pseudogene	predicted_gene_17100	17	10	25	13	10	12	30	36	21	16	21	37	12	40	3.10901	1.49982	3.70216	2.25596	2.09138	1.96769	4.21846	5.43164	3.70796	2.55033
ENSMUSG00000087016	5.22738	6.04646	10.2163	10.0735	9.66988	9.54225	7.96284	19.2902	22.0458	12.7198	30.4061	22.0309	1.19898	10.9853	-0.48051	0.0082019	0.031182	Gm15979	chr4	-	135430126	135430841	590	sense_intronic	predicted_gene_15979	5	7	12	10	8	10	10	21	20	13	26	23	1	11	0.42156	0.484011	0.819245	0.800027	0.771328	0.755947	0.648261	1.46071	1.62803	0.955294
ENSMUSG00000000934	357.553	323.054	310.747	389.845	388.004	355.926	433.178	456.535	516.973	524.445	527.43	589.087	497.576	504.324	-0.47989	2.0708e-11	4.3873e-10	Top1mt	chr15	-	75657035	75678800	1903	protein_coding	DNA_topoisomerase_1_mitochondrial	342	374	365	387	321	373	544	497	469	536	451	615	415	505	8.93983	8.01755	7.72571	9.59906	9.5955	8.74205	10.9336	10.718	11.8364	12.2116
ENSMUSG00000002076	11.5002	15.548	19.5813	15.1103	22.966	11.4507	27.0737	31.2318	38.5801	24.4611	18.7115	23.9466	21.5816	44.9397	-0.47938	0.0052722	0.021738	Hsf2bp	chr17	-	31944769	32034508	2867	protein_coding	heat_shock_transcription_factor_2_binding_protein	11	18	23	15	19	12	34	34	35	25	16	25	18	45	0.190856	0.256126	0.323136	0.246956	0.376988	0.18668	0.453579	0.486685	0.586307	0.378058
ENSMUSG00000057337	1359.12	1359.59	1397.08	1435.48	1376.75	1414.16	1584.61	2214.7	1953.26	1766.09	1831.39	1994.28	2047.85	2127.15	-0.47914	5.4313e-21	2.4338e-19	Chst3	chr10	-	60181532	60219260	6108	protein_coding	carbohydrate_(chondroitin_6/keratan)_sulfotransferase_3	1300	1574	1641	1425	1139	1482	1990	2411	1772	1805	1566	2082	1708	2130	10.5873	10.5127	10.8217	11.0122	10.6078	10.8216	12.4611	16.1993	13.9331	12.8122
ENSMUSG00000080810	5.22738	0.86378	2.55408	5.03676	1.20874	8.58803	7.16656	11.9416	14.3297	12.7198	7.0168	7.66292	7.19387	7.98929	-0.47895	0.007675	0.029467	Gm11737	chr11	-	118204712	118205179	468	pseudogene	predicted_gene_11737	5	1	3	5	1	9	9	13	13	13	6	8	6	8	0.531454	0.0871692	0.258202	0.50429	0.12155	0.857709	0.735527	1.13997	1.33408	1.20432
ENSMUSG00000044997	8.36381	5.18268	17.0272	14.1029	9.66988	10.4965	6.37027	19.2902	27.5572	16.6335	21.0504	12.4523	11.9898	16.9772	-0.47858	0.0076327	0.029328	E130304I02Rik	chr7	+	35802592	35838074	696	antisense	RIKEN_cDNA_E130304I02_gene	8	6	20	14	8	11	8	21	25	17	18	13	10	17	0.571772	0.351683	1.15746	0.949457	0.653856	0.704899	0.439625	1.23825	1.7251	1.05897
ENSMUSG00000100157	25.0914	22.4583	25.5408	23.1691	19.3398	19.0845	23.8885	50.522	28.6595	26.4179	37.423	42.1461	20.3826	40.9451	-0.47795	0.0026027	0.012032	RP23-52N17.1	chr5	+	100210692	100218049	1107	lincRNA	RIKEN_cDNA_2310034O05_gene	24	26	30	23	16	20	30	55	26	27	32	44	17	41	1.07846	0.958152	1.09159	0.980702	0.822193	0.805797	1.03652	2.03898	1.128	1.05745
ENSMUSG00000057706	604.285	625.377	488.681	579.227	604.368	593.528	580.491	911.232	767.193	754.379	725.07	932.961	822.499	810.913	-0.47669	8.6822e-14	2.3547e-12	Mex3b	chr7	+	82867333	82871563	3403	protein_coding	mex3_homolog_B_(C._elegans)	578	724	574	575	500	622	729	992	696	771	620	974	686	812	8.44905	8.67932	6.79414	7.97558	8.35814	8.15214	8.19347	11.9632	9.82272	9.82286
ENSMUSG00000019978	17629.9	17260.1	18373.2	19092.3	18145.5	18867.9	17601.1	24155.9	25512.5	25570.6	25417.2	25712	25366.8	25257.1	-0.47656	3.8534e-69	1.0124e-66	Epb4.1l2	chr10	+	25359798	25523519	4389	protein_coding	erythrocyte_protein_band_4.1-like_2	16863	19982	21581	18953	15012	19773	22104	26297	23145	26134	21734	26843	21157	25291	191.122	185.73	198.057	203.83	194.569	200.933	192.623	245.888	253.266	258.158
ENSMUSG00000100629	30.3188	31.0961	37.4599	40.2941	29.0097	25.7641	46.1845	47.7662	77.1602	45.9868	26.8977	66.0927	55.153	51.9304	-0.47529	0.0020635	0.0099022	RP23-378G22.3	chr11	+	120963844	120964764	778	antisense	predicted_gene_28192	29	36	44	40	24	27	58	52	70	47	23	69	46	52	1.85422	1.88769	2.27802	2.42682	1.75482	1.54785	2.85135	2.74297	4.32119	2.61917
ENSMUSG00000026646	577.103	606.374	536.357	542.962	542.722	559.176	555.806	833.153	822.307	758.293	708.697	760.545	816.504	782.95	-0.47483	8.304e-23	4.0941e-21	Suv39h2	chr2	-	3455815	3475031	4327	protein_coding	suppressor_of_variegation_3-9_homolog_2_(Drosophila)	552	702	630	539	449	586	698	907	746	775	606	794	681	784	6.34591	6.61849	5.8646	5.87975	5.90284	6.04024	6.16979	8.60236	8.28012	7.76534
ENSMUSG00000080893	15.6821	16.4118	22.9867	25.1838	13.2961	13.3592	21.4997	27.5574	26.4549	24.4611	42.1008	32.5674	27.5765	23.9679	-0.47481	0.0034667	0.015318	Gm15920	chr5	+	130188395	130188796	402	pseudogene	predicted_gene_15920	15	19	27	25	11	14	27	30	24	25	36	34	23	24	1.85612	1.92813	2.70534	2.93542	1.55657	1.55326	2.56886	3.06261	2.86728	2.69625
ENSMUSG00000089966	4.1819	5.18268	6.81089	10.0735	7.25241	6.67958	9.55541	8.26723	14.3297	11.7413	17.542	15.3258	11.9898	11.9839	-0.47379	0.0088158	0.033179	Gm16030	chr15	+	7341914	7342516	603	pseudogene	predicted_gene_16030	4	6	8	10	6	7	12	9	13	12	15	16	10	12	0.329978	0.405922	0.534389	0.782779	0.566025	0.517755	0.761143	0.612523	1.03541	0.862799
ENSMUSG00000025997	611.603	707.436	589.142	667.874	572.941	663.187	668.879	896.535	1027.33	806.237	830.322	907.099	841.682	980.685	-0.47366	8.9314e-15	2.6324e-13	Ikzf2	chr1	-	69531214	69687245	9278	protein_coding	IKAROS_family_zinc_finger_2	585	819	692	663	474	695	840	976	932	824	710	947	702	982	3.13649	3.60113	3.00425	3.373	2.9062	3.34098	3.4628	4.3171	4.82443	3.85051
ENSMUSG00000047228	24.0459	38.8701	31.5004	34.2499	27.8009	30.5352	29.4625	58.7892	48.5007	36.2024	45.6092	57.4719	46.7601	32.9558	-0.47262	0.0010768	0.0056522	BC048546	chr6	-	128539822	128581606	4698	protein_coding	cDNA_sequence_BC048546	23	45	37	34	23	32	37	64	44	37	39	60	39	33	0.243532	0.390758	0.317229	0.341604	0.278494	0.303795	0.301225	0.559067	0.449805	0.341456
ENSMUSG00000098221	17.7731	17.2756	10.2163	9.06616	16.9223	7.6338	13.5368	22.0459	18.7389	13.6982	23.3893	19.1573	26.3775	28.9612	-0.47232	0.0063712	0.025368	Gm27030	chr8	+	121654054	121654517	464	lincRNA	predicted_gene_27030	17	20	12	9	14	8	17	24	17	14	20	20	22	29	1.82252	1.75841	1.04171	0.915548	1.71637	0.768981	1.40131	2.12271	1.75961	1.30814
ENSMUSG00000042570	1193.93	1150.56	1382.61	1313.59	1309.06	1242.4	1168.15	1844.51	1654.53	1713.25	1700.41	1827.61	1802.06	1666.77	-0.47215	1.0894e-24	6.1877e-23	Mier2	chr10	-	79540245	79555199	2676	protein_coding	mesoderm_induction_early_response_1_family_member_2	1142	1332	1624	1304	1083	1302	1467	2008	1501	1751	1454	1908	1503	1669	21.2286	20.3061	24.4447	23.0011	23.022	21.7004	20.9675	30.7946	26.9388	28.3691
ENSMUSG00000097399	24.0459	19.867	12.7704	24.1764	19.3398	18.1303	13.5368	22.0459	35.2732	24.4611	35.084	25.8624	28.7755	33.9545	-0.47177	0.0034843	0.015381	Gm26555	chr13	+	58281183	58299145	3726	antisense	predicted_gene_26555	23	23	15	24	16	19	17	24	32	25	30	27	24	34	0.307062	0.251822	0.162156	0.304036	0.244275	0.227433	0.174505	0.264342	0.412469	0.290899
ENSMUSG00000097718	29.2733	25.0496	25.5408	32.2352	22.966	19.0845	16.722	40.4176	37.4778	31.3102	38.5924	40.2303	31.1734	37.9491	-0.471	0.0016516	0.0081707	Gm26896	chr10	-	81606368	81609791	2526	lincRNA	predicted_gene_26896	28	29	30	32	19	20	21	44	34	32	33	42	26	38	0.5514	0.468353	0.478379	0.597962	0.42788	0.353134	0.317971	0.714852	0.646443	0.54924
ENSMUSG00000039375	5039.19	5003.88	4653.54	5377.24	4808.35	5074.57	4841.41	6814.95	7406.28	6875.52	6825.01	6972.3	6703.48	6755.94	-0.47064	3.9673e-44	5.2577e-42	Wdr17	chr8	-	54629055	54887184	4720	protein_coding	WD_repeat_domain_17	4820	5793	5466	5338	3978	5318	6080	7419	6719	7027	5836	7279	5591	6765	50.798	50.0692	46.6458	53.3818	47.9429	50.2516	49.2679	64.506	68.3671	64.5466
ENSMUSG00000040528	28.2278	36.2788	34.0544	49.3602	30.2184	43.8944	25.4811	51.4405	78.2625	41.0946	59.6428	52.6826	38.3673	52.929	-0.47046	0.0015596	0.0077754	Milr1	chr11	+	106751226	106768794	1637	protein_coding	mast_cell_immunoglobulin_like_receptor_1	27	42	40	49	25	46	32	56	71	42	51	55	32	53	0.820459	1.04667	0.984228	1.41288	0.868746	1.25329	0.747659	1.4039	2.08302	1.11236
ENSMUSG00000021125	219.55	221.992	218.8	265.941	205.485	224.243	205.441	360.084	306.436	343.433	281.842	339.084	309.336	256.656	-0.4704	3.3722e-09	5.3766e-08	Arg2	chr12	+	79130777	79156301	1428	protein_coding	arginase_type_II	210	257	257	264	170	235	258	392	278	351	241	354	258	257	7.31531	7.34199	7.24919	8.72634	6.77208	7.33978	6.91025	11.2656	9.34977	10.6567
ENSMUSG00000085523	10.4548	4.3189	1.70272	4.02941	6.04368	8.58803	6.37027	11.023	29.7618	10.7629	8.18627	10.5365	7.19387	9.98661	-0.46987	0.0092685	0.03458	Gm15945	chr15	+	75661407	75663529	810	antisense	predicted_gene_15945	10	5	2	4	5	9	8	12	27	11	7	11	6	10	0.614125	0.251822	0.0994557	0.233094	0.351145	0.495565	0.377752	0.607986	1.6009	0.58878
ENSMUSG00000097236	71.0924	60.4646	65.5548	53.3896	67.6892	48.6655	70.073	70.7307	93.6945	81.2107	88.8795	108.239	88.7244	99.8661	-0.46981	4.748e-05	0.00036737	4831440E17Rik	chr5	+	25499067	25501541	1028	lincRNA	RIKEN_cDNA_4831440E17_gene	68	70	77	53	56	51	88	77	85	83	76	113	74	100	3.29047	2.77788	3.01705	2.43355	3.09882	2.21269	3.2741	3.07393	3.97109	3.50051
ENSMUSG00000078949	35.5462	31.9599	24.6895	35.2573	47.1407	33.3979	29.4625	34.9061	105.82	30.3317	64.3207	34.4832	846.478	72.9023	-0.46951	0.0059717	0.024033	R3hdml	chr2	+	163492318	163502612	1094	protein_coding	R3H_domain_containing-like	34	37	29	35	39	35	37	38	96	31	55	36	706	73	1.54598	1.37973	1.06774	1.51011	2.02791	1.4269	1.29356	1.42549	4.21443	1.22854
ENSMUSG00000101678	69.0014	42.3252	47.6762	43.3161	32.6359	38.169	33.4439	71.6493	71.6487	51.8575	53.7955	70.882	65.9438	66.9103	-0.46946	0.00060955	0.0034562	GTF3C2	chr5	-	31144739	31179911	3223	protein_coding	predicted_gene_29609	66	49	56	43	27	40	42	78	65	53	46	74	55	67	1.01865	0.620218	0.699862	0.629745	0.476546	0.553532	0.498415	0.993188	0.968584	0.712954
ENSMUSG00000058966	20714	19347	18374.1	21158.4	21093.6	19776.3	19123.6	30867.1	28301.3	26595	25837	27193.8	26092.2	29257.8	-0.46913	1.0175e-26	6.4888e-25	Fam57b	chr7	+	126816885	126830219	2331	protein_coding	family_with_sequence_similarity_57_member_B	19813	22398	21582	21004	17451	20725	24016	33603	25675	27181	22093	28390	21762	29297	422.814	391.991	372.936	425.321	425.872	396.548	394.058	591.606	528.996	505.556
ENSMUSG00000027699	51.2283	55.2819	40.014	44.3235	32.6359	44.8486	40.6105	73.4865	60.6259	67.5125	65.4902	68.9663	64.7448	50.9317	-0.46904	0.00019491	0.0012759	Ect2	chr3	-	27097222	27153878	4086	protein_coding	ect2_oncogene	49	64	47	44	27	47	51	80	55	69	56	72	54	51	0.59654	0.638985	0.463323	0.508289	0.375895	0.51303	0.477391	0.803505	0.646471	0.732144
ENSMUSG00000026820	641.922	634.015	723.657	713.205	782.052	686.088	629.861	985.637	837.739	1056.72	1015.1	1026.83	887.244	897.796	-0.46828	1.5448e-14	4.4547e-13	Ptges2	chr2	+	32395896	32402739	1945	protein_coding	prostaglandin_E_synthase_2	614	734	850	708	647	719	791	1073	760	1080	868	1072	740	899	15.7033	15.3952	17.6029	17.1819	18.9228	16.4874	15.5546	22.64	18.7663	24.0741
ENSMUSG00000027488	1284.89	1312.08	1472	1546.28	1574.98	1411.3	1262.11	2051.19	1781.3	1997.98	1931.96	2052.71	2015.48	1895.46	-0.46811	5.665e-19	2.2619e-17	Snta1	chr2	-	154376313	154408099	2131	protein_coding	syntrophin_acidic_1	1229	1519	1729	1535	1303	1479	1585	2233	1616	2042	1652	2143	1681	1898	28.6887	29.0792	32.6811	34.0002	34.7826	30.9548	28.4477	43.0033	36.4202	41.5449
ENSMUSG00000022092	2361.73	2447.95	2264.62	2286.69	2133.42	2435.18	2200.13	3319.75	3385.13	3051.76	3154.05	3069.96	3078.98	3337.53	-0.46779	2.979e-33	2.6134e-31	Ppp3cc	chr14	-	70217898	70289449	1948	protein_coding	protein_phosphatase_3_catalytic_subunit_gamma_isoform	2259	2834	2660	2270	1765	2552	2763	3614	3071	3119	2697	3205	2568	3342	57.6858	59.3499	55.0018	55.0039	51.5415	58.4299	54.2493	76.1371	75.7138	69.418
ENSMUSG00000048424	12.5457	12.0929	5.95953	17.125	8.46115	10.4965	11.148	16.5345	13.2275	14.6766	24.5588	22.9888	19.1836	18.9746	-0.46741	0.0077369	0.029674	Ranbp3l	chr15	+	8968426	9066551	3017	protein_coding	RAN_binding_protein_3-like	12	14	7	17	7	11	14	18	12	15	21	24	16	19	0.197855	0.189305	0.093456	0.265969	0.131985	0.162615	0.177482	0.244847	0.191025	0.215557
ENSMUSG00000091378	7.31833	12.0929	10.2163	9.06616	8.46115	8.58803	9.55541	17.453	15.432	19.5689	11.6947	14.368	15.5867	15.9786	-0.46621	0.0081357	0.030994	Gm4219	chr19	+	59943722	59948398	2143	processed_transcript	predicted_gene_4219	7	14	12	9	7	9	12	19	14	20	10	15	13	16	0.162487	0.266511	0.22555	0.198233	0.185813	0.187311	0.214171	0.363855	0.313755	0.404626
ENSMUSG00000026667	7623.61	7901.86	6865.38	7483.61	7185.93	7294.1	7743.06	10168.7	11541	10556.4	9676.17	10103.6	9783.66	10423	-0.46576	4.3353e-30	3.2798e-28	Uhmk1	chr1	-	170193420	170215397	7864	protein_coding	U2AF_homology_motif_(UHM)_kinase_1	7292	9148	8064	7429	5945	7644	9724	11070	10470	10789	8274	10548	8160	10437	46.1259	47.456	41.3039	44.5906	43.0041	43.3531	47.2937	57.7698	63.9422	59.4817
ENSMUSG00000049721	10.4548	19.867	8.51361	14.1029	16.9223	15.2676	23.8885	21.1274	28.6595	32.2886	35.084	19.1573	19.1836	22.9692	-0.46482	0.0067422	0.026557	Gal3st1	chr11	+	3983636	3999326	1879	protein_coding	galactose-3-O-sulfotransferase_1	10	23	10	14	14	16	30	23	26	33	30	20	16	23	0.264737	0.499356	0.214367	0.351688	0.423841	0.379784	0.610656	0.50234	0.664555	0.761435
ENSMUSG00000100599	28.2278	39.7339	33.2031	27.1985	19.3398	27.6725	31.8514	56.952	35.2732	29.3533	46.7787	67.0506	33.5714	49.9331	-0.46475	0.0030037	0.013577	RP23-34E23.1	chr15	+	99251788	99262044	1428	processed_transcript	RIKEN_cDNA_1700120C14_gene	27	46	39	27	16	29	40	62	32	30	40	70	28	50	0.94054	1.31413	1.10007	0.892467	0.637372	0.90576	1.07136	1.78181	1.07623	0.910833
ENSMUSG00000097170	205.959	204.716	222.205	217.588	177.684	204.204	224.552	322.422	337.3	203.516	278.333	364.947	284.158	275.63	-0.46464	1.1143e-06	1.2049e-05	Gm16982	chr7	-	141610066	141613747	2620	lincRNA	predicted_gene_16982	197	237	261	216	147	214	282	351	306	208	238	381	237	276	3.7403	3.69025	4.01258	3.89143	3.19167	3.64297	4.11671	5.49798	5.60925	3.44198
ENSMUSG00000087617	660.741	617.603	657.251	754.506	622.499	691.813	759.655	951.65	1091.27	880.598	879.439	973.191	871.657	990.672	-0.46431	1.9489e-14	5.5683e-13	Gm14268	chr2	-	166380828	166398187	807	lincRNA	predicted_gene_14268	632	715	772	749	515	725	954	1036	990	900	752	1016	727	992	38.957	36.1444	38.5326	43.8092	36.3024	40.0689	45.2144	52.6845	58.9177	48.352
ENSMUSG00000017344	12670.1	12210.4	13067.5	13414.9	13731.2	14018.5	11052.4	18582.9	17635.5	18770.4	17512.8	16823.9	17334.8	18361.4	-0.46417	3.9907e-24	2.1614e-22	Vtn	chr11	+	78499091	78502324	1744	protein_coding	vitronectin	12119	14136	15349	13317	11360	14691	13880	20230	15999	19184	14975	17564	14458	18386	345.67	330.666	354.502	360.426	370.538	375.706	304.4	476.043	440.586	476.912
ENSMUSG00000038658	3020.38	2738.18	2815.45	3133.87	2822.4	2944.74	2970.14	3617.37	4659.37	4076.19	4095.47	4150.43	4089.71	3687.06	-0.46383	4.6473e-21	2.0976e-19	C030046E11Rik	chr19	+	29522282	29606829	7190	protein_coding	RAB6A_GEF_complex_partner_1	2889	3170	3307	3111	2335	3086	3730	3938	4227	4166	3502	4333	3411	3692	19.9876	17.9862	18.5263	20.4234	18.4739	19.143	19.8418	22.4773	28.235	25.121
ENSMUSG00000053129	7.31833	5.18268	9.36497	6.04411	13.2961	2.86268	1.59257	22.9645	17.6366	18.5904	9.35574	11.4944	3.59693	10.9853	-0.46337	0.010106	0.037115	Gsx1	chr5	+	147188696	147190947	1773	protein_coding	GS_homeobox_1	7	6	11	6	11	3	2	25	16	19	8	12	3	11	0.196395	0.138055	0.249901	0.159735	0.352927	0.0754668	0.0431443	0.578666	0.433407	0.464612
ENSMUSG00000032902	3512.8	4206.61	3845.6	4009.26	4473.53	4113.66	4074.58	6145.31	5367.04	5570.27	5229.86	5459.83	5446.96	5902.09	-0.46257	4.1561e-22	1.9761e-20	Slc16a1	chr3	+	104638668	104658462	4426	protein_coding	solute_carrier_family_16_(monocarboxylic_acid_transporters)_member_1	3360	4870	4517	3980	3701	4311	5117	6690	4869	5693	4472	5700	4543	5910	37.7633	44.8876	41.1077	42.4452	47.5674	43.442	44.2187	62.0314	52.8339	55.7668
ENSMUSG00000092571	38.6826	30.2323	51.933	32.2352	30.2184	35.3063	39.0179	67.975	70.5465	45.9868	50.2871	42.1461	57.5509	49.9331	-0.46256	0.0010681	0.0056141	Gm4134	chr17	-	33861302	33864228	563	pseudogene	predicted_gene_4134	37	35	61	32	25	37	49	74	64	47	43	44	48	50	3.26915	2.53611	4.36421	2.68286	2.526	2.93114	3.32882	5.39412	5.45954	3.61939
ENSMUSG00000086430	34.5007	24.1859	34.0544	34.2499	20.5485	19.0845	37.4253	36.7432	70.5465	27.3964	44.4398	46.9354	47.9591	42.9424	-0.46253	0.0035714	0.015662	4930551O13Rik	chr2	+	5037280	5041133	1065	antisense	RIKEN_cDNA_4930551O13_gene	33	28	40	34	17	20	47	40	64	28	38	49	40	43	1.54137	1.07255	1.51285	1.50691	0.908031	0.837575	1.68791	1.54137	2.88612	1.13987
ENSMUSG00000057130	283.324	309.233	371.193	354.588	315.48	358.789	308.162	477.662	527.996	426.601	445.567	397.514	493.979	449.397	-0.46239	1.2095e-10	2.3133e-09	Txnl4a	chr18	+	80206795	80223533	1756	protein_coding	thioredoxin-like_4A	271	358	436	352	261	376	387	520	479	436	381	415	412	450	7.67691	8.31701	10.0011	9.46182	8.45507	9.55007	8.42924	12.1528	13.1007	10.7648
ENSMUSG00000081909	14.6367	7.77402	7.66225	9.06616	12.0874	8.58803	8.75912	7.34865	17.6366	15.6551	19.8809	17.2416	16.7857	21.9705	-0.46226	0.0095405	0.035428	Gm11341	chr13	+	24320302	24320748	447	pseudogene	predicted_gene_11341	14	9	9	9	10	9	11	8	16	16	17	18	14	22	1.55798	0.821379	0.810998	0.950368	1.27261	0.898004	0.941211	0.734479	1.71908	1.55188
ENSMUSG00000035455	30.3188	20.7307	18.7299	25.1838	20.5485	25.7641	28.6662	33.9875	30.8641	37.1808	35.084	30.6517	45.5612	42.9424	-0.46145	0.0020385	0.0098096	Fignl1	chr11	-	11787431	11808962	2974	protein_coding	fidgetin-like_1	29	24	22	25	17	27	36	37	28	38	30	32	38	43	0.485064	0.329215	0.297966	0.396785	0.325169	0.404917	0.462981	0.510573	0.45217	0.553973
ENSMUSG00000006567	616.831	601.191	505.708	616.499	598.324	572.535	670.471	915.825	914.899	738.724	761.323	885.068	797.32	798.929	-0.46074	4.4064e-13	1.1127e-11	Atp7b	chr8	-	21992785	22060305	6505	protein_coding	ATPase_Cu++_transporting_beta_polypeptide	590	696	594	612	495	600	842	997	830	755	651	924	665	800	4.51177	4.36486	3.6781	4.4408	4.32872	4.11384	4.9507	6.28992	6.12795	5.03206
ENSMUSG00000022580	1136.43	905.242	1246.39	1184.65	1307.85	1155.57	1041.54	1689.27	1587.3	1588.99	1604.51	1624.54	1573.06	1411.11	-0.46059	3.0928e-13	7.9494e-12	Rhpn1	chr15	+	75704280	75714410	2605	protein_coding	rhophilin_Rho_GTPase_binding_protein_1	1087	1048	1464	1176	1082	1211	1308	1839	1440	1624	1372	1696	1312	1413	20.757	16.412	22.6369	21.3087	23.6277	20.7338	19.2045	28.9715	26.5485	27.0286
ENSMUSG00000030641	38.6826	35.415	21.284	23.1691	24.1747	18.1303	27.0737	46.8476	38.5801	43.0515	42.1008	41.1882	29.9744	39.9464	-0.46027	0.0022144	0.010499	4632434I11Rik	chr7	-	92857529	92874213	3349	protein_coding	DNA_damage-induced_apoptosis_suppressor	37	41	25	23	20	19	34	51	35	44	36	43	25	40	0.549577	0.499433	0.300683	0.324167	0.339716	0.253036	0.388299	0.62496	0.501923	0.569617
ENSMUSG00000078125	5.22738	5.18268	13.6218	16.1176	3.62621	5.72535	14.3331	15.6159	28.6595	11.7413	11.6947	16.2837	15.5867	19.9732	-0.46018	0.011338	0.040733	Gm10916	chr14	+	50769248	50769730	483	pseudogene	predicted_gene_10916	5	6	16	16	3	6	18	17	26	12	10	17	13	20	0.514949	0.506772	1.33431	1.56361	0.353326	0.554048	1.42537	1.44444	2.5853	1.07716
ENSMUSG00000086164	256.142	193.487	182.191	243.779	187.354	212.792	286.662	372.025	386.903	259.287	260.791	338.126	268.571	335.55	-0.46011	1.4348e-05	0.00012441	Gm13029	chr4	+	140142873	140144633	594	antisense	predicted_gene_13029	245	224	214	242	155	223	360	405	351	265	223	353	224	336	20.5174	15.384	14.5115	19.2303	14.8439	16.7441	23.1802	27.9812	28.3795	19.3422
ENSMUSG00000038580	12.5457	7.77402	6.81089	6.04411	4.83494	6.67958	6.37027	15.6159	12.1252	7.82754	10.5252	16.2837	15.5867	12.9826	-0.46	0.010993	0.039793	Sct	chr7	-	141278331	141279133	534	protein_coding	secretin	12	9	8	6	4	7	8	17	11	8	9	17	13	13	1.11785	0.687559	0.603439	0.530355	0.426108	0.584656	0.572995	1.30649	0.989318	0.649523
ENSMUSG00000085704	151.594	164.118	138.772	163.191	176.475	156.493	161.646	234.238	236.992	196.667	205.826	218.393	190.637	270.637	-0.45948	4.8575e-08	6.5965e-07	4921531C22Rik	chr2	+	179975993	179979013	1905	processed_transcript	RIKEN_cDNA_4921531C22_gene	145	190	163	162	146	164	203	255	215	201	176	228	159	271	3.7863	4.06881	3.44649	4.01399	4.35973	3.83966	4.07571	5.49341	5.42036	4.57453
ENSMUSG00000018076	4314.68	4198.84	4794.01	4905.8	4572.65	4684.29	4617.65	5710.82	6033.93	6344.22	6699.88	6808.51	6196.32	6521.26	-0.4589	7.4359e-26	4.4967e-24	Med13l	chr5	+	118560719	118765435	9293	protein_coding	mediator_complex_subunit_13-like	4127	4861	5631	4870	3783	4909	5799	6217	5474	6484	5729	7108	5168	6530	22.0913	21.3392	24.407	24.736	23.157	23.5603	23.8671	27.455	28.29	30.2505
ENSMUSG00000060771	364.871	381.791	463.992	485.543	449.65	481.884	434.771	562.172	641.532	596.85	640.868	641.77	598.29	574.23	-0.45884	1.022e-12	2.4802e-11	Tsga10	chr1	-	37754572	37865298	3950	protein_coding	testis_specific_10	349	442	545	482	372	505	546	612	582	610	548	670	499	575	4.39511	4.56493	5.55756	5.75979	5.35732	5.70214	5.28686	6.35845	7.07637	6.69543
ENSMUSG00000053773	2224.77	1987.56	2190.55	2159.76	2104.41	2285.37	2098.21	2964.26	2970.67	2908.91	2882.74	3030.69	2966.27	3004.97	-0.45868	9.7568e-46	1.3708e-43	Rdh8	chr9	+	20818504	20826163	1450	protein_coding	retinol_dehydrogenase_8	2128	2301	2573	2144	1741	2395	2635	3227	2695	2973	2465	3164	2474	3009	73.0038	64.7377	71.4754	69.7932	68.3018	73.6683	69.5048	91.3331	89.2638	88.894
ENSMUSG00000026605	13.5912	10.3654	9.36497	11.0809	12.0874	18.1303	7.96284	10.1044	27.5572	21.5257	18.7115	22.0309	27.5765	11.9839	-0.45859	0.00981	0.036213	Cenpf	chr1	-	189640599	189688086	11137	protein_coding	centromere_protein_F	13	12	11	11	10	19	10	11	25	22	16	23	23	12	0.0580653	0.0439564	0.0397841	0.0466209	0.0510779	0.0760902	0.0343427	0.0405342	0.107809	0.0856446
ENSMUSG00000086350	302.143	307.506	332.031	305.227	291.305	314.894	280.292	473.069	417.767	360.067	445.567	396.556	389.668	485.349	-0.4585	3.8682e-11	7.8738e-10	B230369F24Rik	chr1	-	178313328	178318549	2560	antisense	RIKEN_cDNA_B230369F24_gene	289	356	390	303	241	330	352	515	379	368	381	414	325	486	5.61564	5.67308	6.13634	5.58675	5.35523	5.74933	5.25902	8.2559	7.11023	6.23238
ENSMUSG00000024891	910.609	846.505	796.023	933.815	934.353	921.782	886.264	1353.07	1177.24	1170.22	1205.72	1253.85	1290.1	1145.46	-0.45814	3.5342e-21	1.6029e-19	Slc29a2	chr19	+	5024006	5031971	2472	protein_coding	solute_carrier_family_29_(nucleoside_transporters)_member_2	871	980	935	927	773	966	1113	1473	1068	1196	1031	1309	1076	1147	17.5272	16.1728	15.2352	17.7006	17.7882	17.429	17.2206	24.4541	20.7495	20.9763
ENSMUSG00000081657	1.04548	1.72756	2.55408	2.0147	0	3.8169	0.796284	2.75574	8.81831	5.87066	9.35574	8.62079	1.19898	3.99464	-0.458	0.0050846	0.021085	Gm15466	chr3	-	8882238	8882570	333	pseudogene	predicted_gene_15466	1	2	3	2	0	4	1	3	8	6	8	9	1	4	0.149382	0.245016	0.362879	0.283493	0	0.535746	0.114857	0.369721	1.1538	0.781183
ENSMUSG00000027071	69.0014	48.3717	36.6085	49.3602	60.4368	44.8486	55.7399	92.7767	123.456	67.5125	56.1344	63.2191	52.755	85.8849	-0.45785	0.002039	0.0098096	P2rx3	chr2	-	84998583	85037462	1812	protein_coding	purinergic_receptor_P2X_ligand-gated_ion_channel_3	66	56	43	49	50	47	70	101	112	69	48	66	44	86	1.81187	1.26078	0.955861	1.27642	1.56969	1.15687	1.47755	2.2875	2.96855	1.65096
ENSMUSG00000043036	93.0474	113.155	77.4739	100.735	93.0726	130.729	109.091	154.322	119.047	137.96	139.167	121.649	124.694	245.671	-0.45727	0.00049088	0.0028718	Ccdc63	chr5	-	122108040	122138957	2299	protein_coding	coiled-coil_domain_containing_63	89	131	91	100	77	137	137	168	108	141	119	127	104	246	1.92572	2.32456	1.59436	2.05314	1.90526	2.65782	2.27921	2.99894	2.25616	2.65905
ENSMUSG00000003500	13799.2	13532	13350.2	14061.6	13870.2	14074.8	12553.4	19633.7	19056.4	18478.9	17868.3	18366.1	17860	19739.5	-0.45636	5.7889e-43	7.5119e-41	Impdh1	chr6	-	29200434	29216364	2600	protein_coding	inosine_5'-phosphate_dehydrogenase_1	13199	15666	15681	13959	11475	14750	15765	21374	17288	18886	15279	19174	14896	19766	252.528	245.807	242.932	253.418	251.062	253.024	231.912	337.372	319.342	314.929
ENSMUSG00000030189	7420.79	7273.9	8039.4	8139.4	8242.37	8302.71	7219.11	11136.9	11125.4	11034.9	10463.2	10177.3	10748.8	10520.9	-0.456	4.4062e-32	3.6593e-30	Ybx3	chr6	-	131364858	131388450	1862	protein_coding	Y_box_protein_3	7098	8421	9443	8080	6819	8701	9066	12124	10093	11278	8947	10625	8965	10535	189.626	184.499	204.275	204.828	208.325	208.417	186.225	267.216	260.331	262.602
ENSMUSG00000081670	20.9095	25.0496	11.9191	15.1103	20.5485	21.9472	19.1108	35.8247	29.7618	32.2886	11.6947	27.7781	31.1734	42.9424	-0.456	0.0067785	0.026668	Gm15697	chr6	-	38542303	38546074	2902	pseudogene	predicted_gene_15697	20	29	14	15	17	23	24	39	27	33	10	29	26	43	0.342826	0.407671	0.194319	0.243978	0.333237	0.353487	0.316312	0.551524	0.446839	0.493017
ENSMUSG00000033276	445.373	445.711	499.749	544.977	466.572	468.525	452.289	688.017	681.214	603.699	667.766	726.062	616.275	611.181	-0.45589	6.4115e-15	1.9292e-13	Stk36	chr1	+	74601445	74636894	5489	protein_coding	serine/threonine_kinase_36	426	516	587	541	386	491	568	749	618	617	571	758	514	612	3.86063	3.835	4.30754	4.65222	4.00033	3.98962	3.95783	5.59997	5.40729	4.87346
ENSMUSG00000037010	27.1824	28.5048	43.4194	49.3602	21.7572	33.3979	26.2774	47.7662	33.0687	56.7497	64.3207	36.3989	64.7448	47.9357	-0.45526	0.0034776	0.015362	Apln	chrX	-	48025146	48034853	3149	protein_coding	apelin	26	33	51	49	18	35	33	52	30	58	55	38	54	48	0.410717	0.427514	0.652352	0.73448	0.325163	0.495723	0.400814	0.677685	0.457544	0.798548
ENSMUSG00000028766	3915.31	3740.17	3654.04	4048.54	3991.25	3936.18	3560.19	5312.15	5704.34	5444.05	5199.45	5115.96	5124.43	4989.31	-0.45429	1.4031e-33	1.2666e-31	Alpl	chr4	-	137741733	137796384	2522	protein_coding	alkaline_phosphatase_liver/bone/kidney	3745	4330	4292	4019	3302	4125	4471	5783	5175	5564	4446	5341	4274	4996	73.8667	70.0409	68.5487	75.2193	74.4789	72.9495	67.805	94.1034	98.5484	95.6506
ENSMUSG00000026679	43.91	27.641	22.9867	30.2205	19.3398	34.3521	34.2402	56.952	38.5801	45.0084	60.8123	34.4832	35.9693	47.9357	-0.45417	0.0027884	0.012752	Enkur	chr2	-	21180731	21205365	1199	protein_coding	enkurin_TRPC_channel_interacting_protein	42	32	27	30	16	36	43	62	35	46	52	36	30	48	1.7425	1.08878	0.907046	1.18102	0.759106	1.33914	1.37168	2.12212	1.40195	1.66335
ENSMUSG00000014782	326.188	264.317	328.625	397.904	304.601	367.377	390.179	533.696	497.132	418.773	454.923	476.059	466.402	466.375	-0.45382	8.1221e-09	1.219e-07	Plekhg4	chr8	+	105373274	105382862	4835	protein_coding	pleckstrin_homology_domain_containing_family_G_(with_RhoGef_domain)_member_4	312	306	386	395	252	385	490	581	451	428	389	497	389	467	3.20996	2.58187	3.2157	3.85618	2.96487	3.55147	3.87616	4.93147	4.47986	3.83789
ENSMUSG00000030346	28.2278	41.4615	35.7572	27.1985	30.2184	30.5352	29.4625	61.5449	45.1938	36.2024	37.423	46.9354	57.5509	44.9397	-0.45366	0.001492	0.0074868	Rad51ap1	chr6	-	126923050	126939587	2236	protein_coding	RAD51_associated_protein_1	27	48	42	27	25	32	37	67	41	37	32	49	48	45	0.600667	0.875746	0.756592	0.569966	0.636018	0.638295	0.632895	1.2297	0.880636	0.717424
ENSMUSG00000020189	2552.01	2650.94	2362.53	2535.5	2338.9	2479.08	2614.2	3444.68	4067.44	3361.93	3269.83	3384.14	3286.4	3331.53	-0.45324	1.4834e-21	6.8613e-20	Osbpl8	chr10	+	111164802	111297247	7152	protein_coding	oxysterol_binding_protein-like_8	2441	3069	2775	2517	1935	2598	3283	3750	3690	3436	2796	3533	2741	3336	16.9778	17.5057	15.6286	16.6116	15.3906	16.2015	17.5568	21.5179	24.779	20.8291
ENSMUSG00000054135	33.4552	25.9134	24.6895	32.2352	25.3834	27.6725	25.4811	39.499	45.1938	32.2886	29.2367	47.8933	41.9642	50.9317	-0.45319	0.0018511	0.0090221	A430110L20Rik	chr1	+	181225986	181228498	2513	lincRNA	RIKEN_cDNA_A430110L20_gene	32	30	29	32	21	29	32	43	41	33	25	50	35	51	0.633431	0.48701	0.464826	0.601055	0.475366	0.514694	0.487034	0.70222	0.783566	0.569334
ENSMUSG00000026141	153.685	138.205	90.2443	120.882	83.4028	127.866	137.757	189.228	173.059	160.465	174.251	171.458	124.694	225.697	-0.45297	0.00014215	0.00096874	Col19a1	chr1	-	24261890	24587472	5441	protein_coding	collagen_type_XIX_alpha_1	147	160	106	120	69	134	173	206	157	164	149	179	104	226	1.34394	1.19964	0.784714	1.04102	0.721393	1.09842	1.2161	1.55377	1.38582	1.30681
ENSMUSG00000000276	6405.63	6160.48	6037.85	6634.42	6180.27	6076.51	6300.99	8732.03	9657.15	8432.22	8348.83	8675.39	7938.43	8368.78	-0.45283	4.529e-32	3.7446e-30	Dgke	chr11	-	89035179	89066850	8347	protein_coding	diacylglycerol_kinase_epsilon	6127	7132	7092	6586	5113	6368	7913	9506	8761	8618	7139	9057	6621	8380	36.514	34.857	34.2234	37.2433	34.8455	34.0264	36.2587	46.7374	50.409	44.7633
ENSMUSG00000078247	166.231	134.75	148.988	195.426	149.883	129.775	222.96	225.052	305.334	183.947	223.368	279.697	191.836	228.693	-0.45267	9.4974e-05	0.00068363	Airn	chr17	+	12741311	12860122	1375	antisense	antisense_Igf2r_RNA	159	156	175	194	124	136	280	245	277	188	191	292	160	229	5.75223	4.6284	5.12649	6.65972	5.13004	4.41143	7.78856	7.31241	9.67524	5.9279
ENSMUSG00000034832	6491.36	6027.46	6360.52	6817.75	6119.83	6366.59	6601.99	8707.23	9649.43	7892.12	8592.08	9089.18	8729.76	8876.1	-0.45264	1.5545e-29	1.1172e-27	Tet3	chr6	-	83362373	83459084	10904	protein_coding	tet_methylcytosine_dioxygenase_3	6209	6978	7471	6768	5063	6672	8291	9479	8754	8066	7347	9489	7281	8888	28.3255	26.1068	27.598	29.2975	26.4133	27.2906	29.0819	35.6758	38.5572	32.0714
ENSMUSG00000061731	1078.93	1117.73	1084.63	1083.91	1089.07	1092.59	1064.63	1569.85	1586.19	1439.29	1502.77	1425.3	1445.97	1479.02	-0.45258	3.0016e-36	2.9475e-34	Ext1	chr15	-	53064038	53346159	7663	protein_coding	exostoses_(multiple)_1	1032	1294	1274	1076	901	1145	1337	1709	1439	1471	1285	1488	1206	1481	6.6992	6.88881	6.69661	6.62781	6.68848	6.66423	6.67321	9.15251	9.01875	8.32261
ENSMUSG00000032221	209.095	165.846	143.88	154.125	159.553	191.799	168.016	240.668	271.163	233.848	251.435	244.256	232.602	190.744	-0.4524	2.3382e-07	2.8613e-06	Mns1	chr9	+	72438011	72459199	2424	protein_coding	meiosis-specific_nuclear_structural_protein_1	200	192	169	153	132	201	211	262	246	239	215	255	194	191	4.1043	3.2313	2.80827	2.97931	3.09772	3.69834	3.32929	4.43574	4.87402	4.27475
ENSMUSG00000037386	4319.91	4131.46	4208.28	4850.4	4283.76	4578.37	4197.21	5446.27	6381.15	6017.42	6343.19	6318.08	6000.88	5530.58	-0.45234	1.8676e-23	9.614e-22	Rims2	chr15	+	39198332	39681940	4800	protein_coding	regulating_synaptic_membrane_exocytosis_2	4132	4783	4943	4815	3544	4798	5271	5929	5789	6150	5424	6596	5005	5538	42.8214	40.6507	41.4795	47.3491	42.0004	44.5823	42.0004	50.6917	57.9224	55.5494
ENSMUSG00000091534	15.6821	12.0929	11.9191	27.1985	16.9223	19.0845	19.1108	21.1274	51.8076	19.5689	29.2367	30.6517	25.1785	19.9732	-0.45201	0.0090803	0.033983	Gm17195	chr12	-	79163408	79163835	428	pseudogene	predicted_gene_17195	15	14	14	27	14	20	24	23	47	20	25	32	21	20	1.74337	1.33442	1.31756	2.97767	1.86074	2.08415	2.14471	2.20537	5.27398	2.02597
ENSMUSG00000023216	7.31833	6.04646	9.36497	7.05146	1.20874	6.67958	8.75912	11.9416	14.3297	10.7629	11.6947	10.5365	10.7908	14.9799	-0.45159	0.012762	0.044817	Epb4.2	chr2	-	121017891	121037072	4115	protein_coding	erythrocyte_protein_band_4.2	7	7	11	7	1	7	11	13	13	11	10	11	9	15	0.0846194	0.0693964	0.107673	0.0802943	0.0138239	0.0758703	0.102241	0.129649	0.151725	0.115896
ENSMUSG00000097991	10.4548	8.6378	5.10817	0	3.62621	4.77113	5.57399	6.43007	9.9206	10.7629	14.0336	13.4101	15.5867	7.98929	-0.45131	0.012707	0.044658	Gm7656	chr7	+	70490848	70491851	1004	pseudogene	predicted_gene_7656	10	10	6	0	3	5	7	7	9	11	12	14	13	8	0.495459	0.406327	0.240714	0	0.169977	0.222116	0.266665	0.286129	0.43052	0.475012
ENSMUSG00000030659	652.377	580.46	533.803	541.955	559.645	592.574	460.252	785.387	863.092	759.271	735.595	758.629	728.979	771.965	-0.45089	5.2343e-13	1.3146e-11	Nucb2	chr7	+	116504369	116540554	1913	protein_coding	nucleobindin_2	624	672	627	538	463	621	578	855	783	776	629	792	608	773	16.226	14.3306	13.2019	13.2747	13.7679	14.4784	11.5562	18.3421	19.6576	17.587
ENSMUSG00000095930	1832.72	1907.23	1742.74	1916.99	1717.61	1751	1727.94	2505.89	2516.52	2580.15	2392.73	2340.07	2383.57	2552.58	-0.45088	6.8008e-34	6.2294e-32	Nim1k	chr13	-	119710094	119755882	5307	protein_coding	NIM1_serine/threonine_protein_kinase	1753	2208	2047	1903	1421	1835	2170	2728	2283	2637	2046	2443	1988	2556	16.4314	16.973	15.5365	16.9257	15.2316	15.4216	15.6391	21.0956	20.6605	21.543
ENSMUSG00000027367	5406.16	5485.01	5364.43	5892	5572.27	5424.77	5605.04	8243.35	7792.08	7437.14	7082.29	7628.44	7353.33	7555.87	-0.45072	3.49e-40	3.9285e-38	Stard7	chr2	+	127270218	127298932	3116	protein_coding	START_domain_containing_7	5171	6350	6301	5849	4610	5685	7039	8974	7069	7601	6056	7964	6133	7566	82.5503	83.1352	81.451	88.6014	84.1598	81.3723	86.4004	118.191	108.954	105.759
ENSMUSG00000025257	33.4552	40.5977	34.9058	38.2793	33.8446	31.4894	37.4253	71.6493	52.9098	43.0515	37.423	45.9775	43.1632	72.9023	-0.45068	0.0017235	0.0084863	Ribc1	chrX	-	152004582	152016295	1508	protein_coding	RIB43A_domain_with_coiled-coils_1	32	47	41	38	28	33	47	78	48	44	32	48	36	73	1.05558	1.27147	1.09513	1.18943	1.05623	0.976014	1.19206	2.12271	1.52871	1.26502
ENSMUSG00000074384	88.8655	79.4678	80.8793	101.742	91.8639	104.011	98.7392	135.031	122.354	128.176	119.286	121.649	124.694	150.798	-0.4504	2.4823e-06	2.5154e-05	AI429214	chr8	+	36993575	36995531	1957	protein_coding	expressed_sequence_AI429214	85	92	95	101	76	109	124	147	111	131	102	127	104	151	2.16058	1.91781	1.95532	2.43606	2.20914	2.48416	2.42344	3.08265	2.72406	2.90219
ENSMUSG00000083111	20.9095	12.9567	26.3922	22.1617	24.1747	25.7641	18.3145	34.9061	46.2961	27.3964	25.7283	37.3568	20.3826	36.9505	-0.4504	0.0052741	0.021739	Gm14421	chr2	-	177053516	177056838	1958	pseudogene	predicted_gene_14421	20	15	31	22	20	27	23	38	42	28	22	39	17	37	0.508112	0.312527	0.637725	0.530355	0.581057	0.615027	0.44928	0.796467	1.0302	0.619999
ENSMUSG00000087258	27.1824	31.9599	25.5408	44.3235	26.5922	37.2148	31.8514	39.499	58.4213	28.3748	47.9482	66.0927	49.1581	46.9371	-0.45037	0.0029021	0.013194	Gm15461	chr5	-	30817977	30822612	235	lincRNA	predicted_gene_15461	26	37	30	44	22	39	40	43	53	29	41	69	41	47	5.5036	6.42307	5.14207	8.83774	5.32545	7.40185	6.5102	7.50927	10.8316	5.35027
ENSMUSG00000031831	28.2278	26.7772	23.8381	32.2352	29.0097	22.9014	28.6662	40.4176	49.603	34.2455	19.8809	51.7247	47.9591	41.9438	-0.45015	0.003159	0.014161	Dnaaf1	chr8	+	119575235	119598454	2821	protein_coding	dynein_axonemal_assembly_factor_1	27	31	28	32	24	24	36	44	45	35	17	54	40	42	0.476105	0.448299	0.399797	0.535431	0.48396	0.379447	0.488092	0.640098	0.766115	0.537911
ENSMUSG00000061510	28.2278	34.5512	19.5813	19.1397	22.966	24.8099	28.6662	45.0105	44.0915	38.1593	26.8977	39.2725	35.9693	35.9518	-0.45007	0.0027233	0.012494	Gm10101	chr14	-	46829109	46832027	2919	lincRNA	predicted_gene_10101	27	40	23	19	19	26	36	49	40	39	23	41	30	36	0.46012	0.55903	0.317379	0.307239	0.370272	0.397267	0.471705	0.688904	0.658128	0.579264
ENSMUSG00000031780	2.09095	1.72756	4.25681	6.04411	3.62621	5.72535	1.59257	6.43007	12.1252	13.6982	10.5252	7.66292	5.99489	1.99732	-0.44955	0.010682	0.038849	Ccl17	chr8	+	94810453	94812035	513	protein_coding	chemokine_(C-C_motif)_ligand_17	2	2	5	6	3	6	2	7	11	14	9	8	5	2	0.193934	0.159046	0.392588	0.552065	0.332664	0.521648	0.149113	0.559987	1.02982	1.1832
ENSMUSG00000085403	84.6835	65.6473	74.9198	81.5955	80.9853	42.9401	59.7213	114.823	93.6945	79.2538	107.591	75.6714	106.709	126.83	-0.44865	0.00054579	0.0031409	Gm13068	chr4	+	149748518	149749607	876	antisense	predicted_gene_13068	81	76	88	81	67	45	75	125	85	81	92	79	89	127	4.59963	3.53931	4.04635	4.36453	4.35083	2.29114	3.27461	5.85602	4.66014	4.00891
ENSMUSG00000045103	4644	4644.55	4129.95	4811.11	3938.06	4659.48	5004.64	5779.71	7043.62	5820.75	6263.67	6756.78	6112.39	5997.96	-0.44857	2.7907e-16	9.1324e-15	Dmd	chrX	+	82948870	85206141	14910	protein_coding	dystrophin_muscular_dystrophy	4442	5377	4851	4776	3258	4883	6285	6292	6390	5949	5356	7054	5098	6006	14.8198	14.712	13.105	15.1197	12.4301	14.6067	16.1224	17.3184	20.583	17.2986
ENSMUSG00000078439	155.776	132.158	151.542	173.264	157.136	144.088	190.312	235.157	255.731	187.861	208.165	221.267	200.229	227.695	-0.44655	3.4163e-07	4.0583e-06	Smim24	chr10	+	81393051	81395392	949	protein_coding	small_integral_membrane_protein_24	149	153	178	172	130	151	239	256	232	192	178	231	167	228	7.81019	6.57709	7.55507	8.55498	7.79253	7.09666	9.63238	11.0706	11.741	8.77164
ENSMUSG00000075600	560.375	459.531	568.709	551.021	517.339	545.817	542.269	723.842	721.999	720.134	719.222	788.323	749.361	711.047	-0.4464	1.2855e-18	5.0148e-17	Zc3h3	chr15	-	75754432	75841915	3360	protein_coding	zinc_finger_CCCH_type_containing_3	536	532	668	547	428	572	681	788	655	736	615	823	625	712	7.93537	6.45924	8.00796	7.68431	7.24613	7.59277	7.75193	9.62463	9.36238	9.49695
ENSMUSG00000024556	841.608	820.591	820.712	858.263	803.809	804.412	800.265	1090.36	1288.58	1025.41	1098.13	1101.55	1124.64	1149.46	-0.44629	7.9442e-22	3.7204e-20	Me2	chr18	-	73770040	73815392	2455	protein_coding	malic_enzyme_2_NAD(+)-dependent_mitochondrial	805	950	964	852	665	843	1005	1187	1169	1048	939	1150	938	1151	16.3112	15.7863	15.8165	16.3812	15.4089	15.3151	15.6573	19.8425	22.869	18.5078
ENSMUSG00000053205	424.463	487.172	475.059	457.337	462.946	417.951	405.309	629.228	702.158	594.893	630.343	581.424	585.101	578.225	-0.44626	1.8131e-14	5.1961e-13	Styx	chr14	+	45351473	45373585	672	protein_coding	serine/threonine/tyrosine_interaction_protein	406	564	558	454	383	438	509	685	637	608	539	607	488	579	30.0537	34.2388	33.4464	31.8892	32.4213	29.0702	28.9701	41.8329	45.5255	39.2265
ENSMUSG00000070368	4.1819	14.6843	5.10817	4.02941	9.66988	6.67958	7.96284	21.1274	7.71602	9.78443	15.2031	13.4101	16.7857	11.9839	-0.44616	0.014162	0.04906	Prok1	chr3	-	107235531	107239707	414	protein_coding	prokineticin_1	4	17	6	4	8	7	10	23	7	10	13	14	14	12	0.48062	1.67516	0.583761	0.456054	1.09924	0.754121	0.923851	2.27995	0.812049	1.04724
ENSMUSG00000004098	95.1383	68.2387	98.7579	101.742	67.6892	87.7887	108.295	151.566	84.8762	106.65	126.302	149.427	136.683	140.811	-0.44592	0.00025131	0.0015822	Col5a3	chr9	-	20770050	20815067	6119	protein_coding	collagen_type_V_alpha_3	91	79	116	101	56	92	136	165	77	109	108	156	114	141	0.73978	0.526691	0.763593	0.779108	0.520606	0.67058	0.850081	1.10663	0.604359	0.77231
ENSMUSG00000028189	266.596	279.865	264.773	262.919	257.461	250.961	279.496	402.338	413.358	274.942	371.891	403.261	378.877	332.554	-0.44444	1.0855e-08	1.5997e-07	Ctbs	chr3	+	146450470	146465849	2892	protein_coding	chitobiase_di-N-acetyl-	255	324	311	261	213	263	351	438	375	281	318	421	316	333	4.38615	4.57041	4.33158	4.25989	4.1897	4.05603	4.64206	6.21545	6.22755	4.21263
ENSMUSG00000041791	2.09095	2.59134	1.70272	3.02205	0	1.90845	3.18514	5.51149	3.30687	6.8491	5.84734	4.78933	9.59182	3.99464	-0.44403	0.0092976	0.034671	Capza3	chr6	+	140041557	140042778	1222	protein_coding	capping_protein_(actin_filament)_muscle_Z-line_alpha_3	2	3	2	3	0	2	4	6	3	7	5	5	8	4	0.0814143	0.100152	0.065924	0.11588	0	0.0729965	0.125196	0.201501	0.117906	0.248355
ENSMUSG00000032109	258.233	266.044	272.436	280.044	276.8	250.961	276.311	376.618	371.471	359.088	348.501	357.284	347.704	417.44	-0.44355	2.8136e-13	7.2718e-12	Nlrx1	chr9	-	44252713	44268599	3685	protein_coding	NLR_family_member_X1	247	308	320	278	229	263	347	410	337	367	298	373	290	418	3.33427	3.40975	3.49782	3.56093	3.53508	3.18318	3.60159	4.56608	4.39215	4.31792
ENSMUSG00000021983	1748.04	1931.41	2002.4	2127.53	1778.05	2065.9	2243.93	2374.53	2767.85	2621.25	2766.96	2942.56	2768.44	2809.23	-0.44292	2.1113e-15	6.5424e-14	Atp8a2	chr14	-	59647531	60197179	3895	protein_coding	ATPase_aminophospholipid_transporter-like_class_I_type_8A_member_2	1672	2236	2352	2112	1471	2165	2818	2585	2511	2679	2366	3072	2309	2813	21.3536	23.4193	24.3228	25.5943	21.4836	24.791	27.6717	27.2364	30.9616	29.8202
ENSMUSG00000061175	1386.3	1441.65	1461.79	1612.77	1501.25	1584.01	1371.2	1689.27	2268.51	1997.98	2047.74	2079.53	2142.57	1958.37	-0.44227	1.8056e-15	5.6139e-14	Fnip2	chr3	-	79455971	79567796	7299	protein_coding	folliculin_interacting_protein_2	1326	1669	1717	1601	1242	1660	1722	1839	2058	2042	1751	2171	1787	1961	9.03695	9.32829	9.47527	10.3534	9.67965	10.1435	9.02343	10.3399	13.5415	12.1294
ENSMUSG00000021733	5671.71	5758.82	5686.24	6243.56	5371.62	5829.36	5775.45	7436.83	8848.07	7702.3	7721.99	8081.51	7793.36	7446.02	-0.4422	1.3073e-27	8.5715e-26	Slc4a7	chr14	+	14703025	14799943	7389	protein_coding	solute_carrier_family_4_sodium_bicarbonate_cotransporter_member_7	5425	6667	6679	6198	4444	6109	7253	8096	8027	7872	6603	8437	6500	7456	36.5221	36.809	36.4091	39.5934	34.2129	36.8746	37.5434	44.9658	52.1738	46.1897
ENSMUSG00000013155	350.234	298.004	400.991	402.941	436.354	390.278	374.253	567.683	476.189	496.07	492.346	536.405	502.372	568.238	-0.44202	4.5894e-10	8.3179e-09	Enkd1	chr8	-	105703655	105707933	1272	protein_coding	enkurin_domain_containing_1	335	345	471	400	361	409	470	618	432	507	421	560	419	569	13.1008	11.0647	14.9148	14.8433	16.1444	14.341	14.1323	19.9388	16.311	17.2809
ENSMUSG00000002058	26288.5	26511.1	27911.9	28352.9	29974.2	29175.4	24465.8	38827.5	36041.5	39548.6	37241.7	36388.3	35951.3	38802	-0.44189	4.3757e-26	2.7437e-24	Unc119	chr11	+	78343482	78349164	1371	protein_coding	unc-119_homolog_(C._elegans)	25145	30692	32785	28146	24798	30575	30725	42269	32697	40420	31845	37989	29985	38854	912.338	913.265	963.213	969.027	1028.92	994.655	857.149	1265.27	1145.39	1278.22
ENSMUSG00000078183	30.3188	28.5048	27.2436	28.2058	44.7232	62.0246	43.7956	52.3591	39.6824	48.9221	63.1512	56.5141	85.1274	51.9304	-0.44187	0.0046465	0.019524	Gm15610	chr5	+	8971948	8972142	195	pseudogene	predicted_gene_15610	29	33	32	28	37	65	55	57	36	50	54	59	71	52	7.39784	6.9038	6.60998	6.77766	10.7937	14.867	10.7877	11.996	8.8665	11.1168
ENSMUSG00000074635	37.6371	51.8268	41.7167	22.1617	31.4271	39.1232	33.4439	38.5804	60.6259	57.7281	44.4398	65.1348	70.7397	44.9397	-0.44185	0.0028465	0.012986	3110070M22Rik	chr13	-	119487261	119488383	1123	protein_coding	RIKEN_cDNA_3110070M22_gene	36	60	49	22	26	41	42	42	55	59	38	68	59	45	1.59465	2.17962	1.75752	0.924697	1.31703	1.62835	1.43045	1.53485	2.35216	2.27781
ENSMUSG00000024658	16.7276	30.2323	17.8786	30.2205	22.966	26.7183	23.8885	42.2547	25.3526	36.2024	32.7451	36.3989	29.9744	47.9357	-0.4407	0.0044952	0.019004	Gm9750	chr19	+	9135157	9279175	2017	processed_transcript	predicted_gene_9750	16	35	21	30	19	28	30	46	23	37	28	38	25	48	0.394599	0.707899	0.419371	0.702056	0.535857	0.619149	0.568876	0.935942	0.547654	0.795319
ENSMUSG00000069862	13.5912	6.04646	7.66225	15.1103	10.8786	9.54225	7.96284	23.8831	23.1481	13.6982	17.542	14.368	11.9898	11.9839	-0.43966	0.013894	0.048265	Rps12-ps9	chr8	+	123206623	123207021	399	pseudogene	ribosomal_protein_S12_pseudogene_9	13	7	9	15	9	10	10	26	21	14	15	15	10	12	1.62074	0.715705	0.908561	1.7745	1.28313	1.11782	0.958582	2.67422	2.52773	1.52125
ENSMUSG00000097331	189.231	112.291	138.772	172.257	122.082	139.317	156.072	219.541	256.833	177.098	183.606	207.857	201.428	191.743	-0.43963	2.0572e-05	0.00017293	F420014N23Rik	chr10	+	127195249	127202643	2396	lincRNA	RIKEN_cDNA_F420014N23_gene	181	130	163	171	101	146	196	239	233	181	157	217	168	192	3.7578	2.21343	2.74022	3.36873	2.39793	2.71775	3.12875	4.09363	4.67039	3.2752
ENSMUSG00000023939	197.595	216.809	217.948	233.706	298.558	268.137	224.552	318.748	276.674	358.11	329.79	332.379	363.29	301.596	-0.43907	1.2915e-07	1.6462e-06	Mrpl14	chr17	+	45686322	45698495	645	protein_coding	mitochondrial_ribosomal_protein_L14	189	251	256	232	247	281	282	347	251	366	282	347	303	302	14.5762	15.8753	15.9869	16.9779	21.784	19.4308	16.7221	22.0784	18.6895	24.6018
ENSMUSG00000046404	714.06	768.765	681.089	740.403	605.577	695.63	758.062	1028.81	1180.55	907.016	840.847	976.065	953.187	921.764	-0.4389	3.1079e-11	6.4313e-10	Yod1	chr1	+	130717327	130724358	6128	protein_coding	YOD1_OTU_deubiquitinating_enzyme_1_homologue_(S._cerevisiae)	683	890	800	735	501	729	952	1120	1071	927	719	1019	795	923	5.54426	5.92489	5.25843	5.66142	4.65072	5.30582	5.94183	7.5006	8.39373	6.55853
ENSMUSG00000027115	92.0019	111.428	100.461	83.6102	113.621	104.011	83.6098	135.031	151.014	125.241	118.116	140.806	146.275	137.815	-0.43853	4.235e-06	4.1109e-05	Kif18a	chr2	+	109280738	109341747	6509	protein_coding	kinesin_family_member_18A	88	129	118	83	94	109	105	147	137	128	101	147	122	138	0.672528	0.808508	0.730218	0.601895	0.821514	0.746888	0.616989	0.92683	1.01086	0.852592
ENSMUSG00000037977	847.881	817.136	860.726	807.896	846.115	879.796	828.135	1210.69	1123.23	1129.12	1078.25	1117.83	1117.45	1221.36	-0.4379	2.5631e-27	1.6746e-25	6430571L13Rik	chr9	+	107340602	107352422	2590	protein_coding	RIKEN_cDNA_6430571L13_gene	811	946	1011	802	700	922	1040	1318	1019	1154	922	1167	932	1223	15.5762	14.9005	15.723	14.6161	15.3745	15.8772	15.358	20.884	18.8955	19.3175
ENSMUSG00000039543	122.321	132.158	103.015	110.809	93.0726	116.415	128.998	192.902	188.491	104.693	167.234	167.626	160.663	152.795	-0.4379	6.1695e-05	0.00046504	Ttc18	chr14	-	20394190	20452226	3632	protein_coding	cilia_and_flagella_associated_protein_70	117	153	121	110	77	122	162	210	171	107	143	175	134	153	1.60244	1.71852	1.34191	1.42956	1.206	1.49816	1.70597	2.37285	2.26118	1.27727
ENSMUSG00000029663	13888.1	13406.7	13668.6	11854.5	12915.3	15702.7	11119.3	18032.7	18342.1	19072.8	17028.6	18416.9	17724.5	17698.3	-0.43783	5.2347e-15	1.5777e-13	Gngt1	chr6	+	3993797	3997436	2976	protein_coding	guanine_nucleotide_binding_protein_(G_protein)_gamma_transducing_activity_polypeptide_1	13284	15521	16055	11768	10685	16456	13964	19631	16640	19493	14561	19227	14783	17722	222.043	212.763	217.301	186.649	204.241	246.624	179.465	270.711	268.537	283.982
ENSMUSG00000085826	28.2278	34.5512	14.4731	32.2352	19.3398	13.3592	21.4997	23.8831	62.8304	34.2455	26.8977	38.3146	28.7755	42.9424	-0.43759	0.01064	0.038727	Gm15638	chr16	+	45945606	45971370	2945	antisense	predicted_gene_15638	27	40	17	32	16	14	27	26	57	35	23	40	24	43	0.456058	0.554094	0.232513	0.512887	0.309055	0.212025	0.350655	0.362314	0.929553	0.515262
ENSMUSG00000045730	29.2733	27.641	21.284	35.2573	22.966	29.581	39.0179	55.1149	54.0121	40.1161	32.7451	32.5674	51.556	37.9491	-0.43742	0.0037606	0.016361	Adrb2	chr18	-	62177817	62179959	2143	protein_coding	adrenergic_receptor_beta_2	28	32	25	35	19	31	49	60	49	41	28	34	43	38	0.649947	0.609167	0.469897	0.770908	0.504351	0.645183	0.874533	1.14902	1.09814	0.829483
ENSMUSG00000101856	155.776	141.66	102.163	134.985	111.204	118.324	111.48	207.599	177.468	185.904	157.878	159.006	148.673	175.764	-0.43731	8.7789e-06	8.0177e-05	RP23-405O11.1	chr5	+	25530013	25531466	1454	lincRNA	RIKEN_cDNA_1700096K18_gene	149	164	120	134	92	124	140	226	161	190	135	166	124	176	5.09758	4.60138	3.32431	4.35008	3.59936	3.80365	3.68269	6.37883	5.31797	5.66546
ENSMUSG00000054074	2254.05	2144.77	2420.42	2489.17	2479.12	2466.67	2262.24	3153.49	2962.95	3273.87	3279.19	3297.93	3408.69	3068.89	-0.43706	1.4138e-25	8.3337e-24	Skida1	chr2	-	18040676	18049051	4376	protein_coding	SKI/DACH_domain_containing_1	2156	2483	2843	2471	2051	2585	2841	3433	2688	3346	2804	3443	2843	3073	24.5083	23.1477	26.1688	26.6534	26.6618	26.3467	24.8311	32.1954	29.501	33.1508
ENSMUSG00000027530	2116.04	2224.23	1980.27	1978.44	2001.67	2162.27	1942.14	2949.56	3024.68	2618.31	2666.39	2725.13	2749.26	2847.18	-0.43697	2.2611e-25	1.3203e-23	Fabp12	chr3	-	10244209	10301183	2512	protein_coding	fatty_acid_binding_protein_12	2024	2575	2326	1964	1656	2266	2439	3211	2744	2676	2280	2845	2293	2851	40.0805	41.8183	37.2971	36.9044	37.5009	40.2331	37.1359	52.4587	52.4625	46.1862
ENSMUSG00000085428	24.0459	13.8205	14.4731	19.1397	18.131	19.0845	17.5182	36.7432	25.3526	22.5042	23.3893	27.7781	22.7806	29.9598	-0.43679	0.0067789	0.026668	Gm14344	chr2	+	180836481	180848914	580	lincRNA	predicted_gene_14344	23	16	17	19	15	20	22	40	23	23	20	29	19	30	1.97261	1.12538	1.18061	1.54626	1.47118	1.53796	1.45076	2.83028	1.90451	1.71928
ENSMUSG00000070730	923.155	926.836	1082.93	1079.88	1051.6	1025.79	929.263	1397.16	1363.53	1382.54	1270.04	1479.9	1345.25	1305.25	-0.4366	5.7391e-19	2.2866e-17	Rmdn3	chr2	-	119137001	119157034	2249	protein_coding	regulator_of_microtubule_dynamics_3	883	1073	1272	1072	870	1075	1167	1521	1237	1413	1086	1545	1122	1307	19.5305	19.4634	22.7815	22.4989	22.0055	21.3188	19.8465	27.7547	26.4159	27.2395
ENSMUSG00000097527	40.7736	44.0528	14.4731	34.2499	37.4708	37.2148	37.4253	44.0919	70.5465	44.0299	38.5924	47.8933	56.352	62.9156	-0.4363	0.0047665	0.019948	1700112J16Rik	chr7	-	67204082	67222458	2215	lincRNA	RIKEN_cDNA_1700112J16_gene	39	51	17	34	31	39	47	48	64	45	33	50	47	63	0.875856	0.939302	0.309143	0.724539	0.79614	0.785297	0.81157	0.889333	1.38768	0.880815
ENSMUSG00000027636	8.36381	13.8205	8.51361	16.1176	7.25241	8.58803	15.1294	20.2088	22.0458	10.7629	16.3725	16.2837	16.7857	25.9652	-0.43614	0.013679	0.047616	Sla2	chr2	-	156872457	156887192	2973	protein_coding	Src-like-adaptor_2	8	16	10	16	6	9	19	22	20	11	14	17	14	26	0.133856	0.21955	0.135485	0.254028	0.114804	0.135018	0.244434	0.303686	0.323087	0.160414
ENSMUSG00000042210	1522.21	1374.27	1374.1	1562.4	1387.63	1346.41	1607.7	2307.48	2210.09	1592.9	1677.02	1992.36	1811.66	2378.81	-0.43604	1.6241e-08	2.3399e-07	Abhd14a	chr9	-	106440051	106447678	1258	protein_coding	abhydrolase_domain_containing_14A	1456	1591	1614	1551	1148	1411	2019	2512	2005	1628	1434	2080	1511	2382	57.5735	51.5939	51.6782	58.1953	51.9114	50.0253	61.3844	81.9476	76.5452	56.1073
ENSMUSG00000048546	5538.93	6292.64	4839.99	5502.15	6095.65	5867.53	6317.72	8504.22	8138.2	7504.65	7373.49	7726.14	7741.8	8093.15	-0.43602	6.2034e-17	2.1586e-15	Tob2	chr15	-	81848270	81858326	3994	protein_coding	transducer_of_ERBB2_2	5298	7285	5685	5462	5043	6149	7934	9258	7383	7670	6305	8066	6457	8104	65.9851	74.4098	57.3333	64.5506	71.8261	68.6657	75.9777	95.1275	88.7788	83.2594
ENSMUSG00000074794	1660.22	1541.85	1826.17	1521.1	1677.73	1587.83	1701.66	2042.01	2269.61	2317.93	2379.87	2368.8	1902.78	2410.77	-0.43597	1.742e-15	5.4251e-14	Arrdc3	chr13	+	80883384	80896035	4132	protein_coding	arrestin_domain_containing_3	1588	1785	2145	1510	1388	1664	2137	2223	2059	2369	2035	2473	1587	2414	19.1175	17.6233	20.9099	17.2494	19.1087	17.9612	19.7809	22.0788	23.9321	24.8571
ENSMUSG00000099034	284.369	314.416	327.774	329.404	280.427	332.07	367.883	401.42	435.404	405.075	396.449	490.427	456.811	485.349	-0.43589	5.3182e-10	9.5645e-09	2810039B14Rik	chr15	+	75642129	75653643	2796	pseudogene	RIKEN_cDNA_2810039B14_gene	272	364	385	327	232	348	462	437	395	414	339	512	381	486	4.8392	5.31096	5.54636	5.52036	4.72011	5.55118	6.31985	6.41418	6.78491	6.41961
ENSMUSG00000101013	190.277	199.533	148.137	177.294	154.718	173.669	178.368	263.633	275.572	181.012	236.232	248.087	244.591	239.679	-0.43571	7.4996e-07	8.3316e-06	RP24-300D7.1	chr5	+	20950989	20956398	5410	antisense	RIKEN_cDNA_A630072M18_gene	182	231	174	176	128	182	224	287	250	185	202	259	204	240	1.67346	1.7419	1.2955	1.53558	1.3459	1.50044	1.58363	2.17712	2.21936	1.48259
ENSMUSG00000071181	29.2733	31.9599	22.1354	29.2132	22.966	28.6268	31.0551	45.0105	41.887	35.2239	33.9145	52.6826	43.1632	32.9558	-0.43541	0.0026599	0.012254	3830408C21Rik	chr13	+	107031963	107033673	1711	protein_coding	RIKEN_cDNA_3830408C21_gene	28	37	26	29	19	30	39	49	38	36	29	55	36	33	0.814048	0.882187	0.61208	0.800027	0.631691	0.782014	0.8718	1.17528	1.06664	0.912217
ENSMUSG00000057132	27240.9	24102.1	22875.2	27940.9	22271	23480.6	27253.6	37221.8	42970.5	27849.4	31352.2	35034.9	31931.2	35019	-0.43461	5.4554e-07	6.2234e-06	Rpgrip1	chr14	+	52110704	52163546	7878	protein_coding	retinitis_pigmentosa_GTPase_regulator_interacting_protein_1	26056	27903	26869	27737	18425	24607	34226	40521	38983	28463	26809	36576	26632	35066	164.526	144.492	137.379	166.188	133.043	139.311	166.166	211.087	237.653	156.643
ENSMUSG00000087047	23.0005	37.1426	36.6085	42.3088	48.3494	43.8944	41.4068	58.7892	67.2396	48.9221	57.3039	69.9242	37.1683	52.929	-0.43404	0.0020094	0.0096921	1700110K17Rik	chr9	+	40323426	40343564	927	processed_transcript	RIKEN_cDNA_1700110K17_gene	22	43	43	42	40	46	52	64	61	50	49	73	31	53	1.18055	1.89233	1.86841	2.13858	2.45461	2.2132	2.14549	2.83333	3.16035	2.33849
ENSMUSG00000095913	35.5462	38.8701	32.3517	37.272	37.4708	28.6268	42.203	46.8476	59.5236	41.0946	54.965	58.4298	41.9642	58.921	-0.43324	0.0012755	0.0065405	Gm21844	chr19	+	4801512	4805784	663	antisense	predicted_gene_21844	34	45	38	37	31	30	53	51	54	42	47	61	35	59	2.55098	2.7689	2.30863	2.63418	2.6598	2.01814	3.05749	3.15685	3.91169	2.74651
ENSMUSG00000022114	1122.84	1085.77	1002.9	1036.56	1054.02	1050.6	1119.58	1589.15	1603.83	1415.81	1334.36	1447.33	1346.45	1400.12	-0.43295	1.5865e-19	6.5012e-18	Spry2	chr14	-	105891949	105896819	2085	protein_coding	sprouty_homolog_2_(Drosophila)	1074	1257	1178	1029	872	1101	1406	1730	1455	1447	1141	1511	1123	1402	25.6236	24.5945	22.7575	23.2952	23.791	23.5518	25.7918	34.0516	33.5152	30.089
ENSMUSG00000021636	41.819	47.5079	62.1494	31.2279	33.8446	41.0317	44.5919	53.2777	92.5922	40.1161	60.8123	54.5983	67.1428	77.8956	-0.43294	0.0035604	0.015636	Marveld2	chr13	-	100595957	100616971	3061	protein_coding	MARVEL_(membrane-associating)_domain_containing_2	40	55	73	31	28	43	56	58	84	41	52	57	56	78	0.650038	0.733007	0.960603	0.47803	0.520351	0.62654	0.699724	0.77761	1.31795	0.580719
ENSMUSG00000025380	2147.41	2039.39	2559.19	2481.11	2662.84	2524.88	2001.86	2997.33	2901.22	3646.66	3238.25	3204.06	3209.66	3175.74	-0.43288	1.604e-11	3.4451e-10	Fscn2	chr11	+	120361534	120368168	1713	protein_coding	fascin_homolog_2_actin-bundling_protein_retinal_(Strongylocentrotus_purpuratus)	2054	2361	3006	2463	2203	2646	2514	3263	2632	3727	2769	3345	2677	3180	59.6465	56.2273	70.6832	67.8678	73.1574	68.8931	56.1319	78.173	73.7926	94.3295
ENSMUSG00000072437	358.598	423.252	474.208	438.198	454.485	373.102	402.92	564.009	695.544	549.885	569.531	551.73	517.958	548.265	-0.43284	7.5913e-10	1.3446e-08	Nanos1	chr19	+	60755987	60759913	3927	protein_coding	nanos_homolog_1_(Drosophila)	343	490	557	435	376	391	506	614	631	562	487	576	432	549	4.34485	5.09031	5.71319	5.22859	5.44664	4.44078	4.92824	6.41659	7.71708	6.20471
ENSMUSG00000097410	55.4102	54.4182	34.9058	57.419	41.097	50.5739	78.8321	70.7307	111.331	59.685	76.0154	71.8399	87.5254	65.9116	-0.4326	0.0022989	0.010832	Gm26668	chr11	+	102863337	103075903	3635	lincRNA	predicted_gene_26668	53	63	41	57	34	53	99	77	101	61	65	75	73	66	0.725293	0.707042	0.454322	0.740162	0.532079	0.650302	1.04168	0.869327	1.33445	0.727564
ENSMUSG00000072761	95.1383	114.883	108.974	89.6543	122.082	105.919	131.387	165.345	194.003	106.65	178.928	128.354	158.265	146.803	-0.43201	0.0001255	0.00086526	Gm6712	chr17	+	17294443	17319511	526	lincRNA	predicted_gene_6712	91	133	128	89	101	111	165	180	176	109	153	134	132	147	8.60592	10.3151	9.80187	7.98658	10.9229	9.41197	11.9978	14.0438	16.0698	8.98435
ENSMUSG00000090206	103.502	110.564	120.893	117.86	139.005	130.729	131.387	177.286	158.73	155.572	173.081	170.5	181.046	156.79	-0.43198	3.5193e-07	4.1727e-06	Tepp	chr8	+	95310566	95326323	881	protein_coding	testis_prostate_and_placenta_expressed	99	128	142	117	115	137	165	193	144	159	148	178	151	157	5.58986	5.92711	6.49228	6.26854	7.42546	6.93566	7.16325	8.99039	7.85003	7.82469
ENSMUSG00000022827	335.598	341.193	299.679	308.25	322.732	367.377	327.273	442.756	459.654	461.825	484.159	412.84	419.642	449.397	-0.43093	2.2996e-13	6.0015e-12	Rabl3	chr16	+	37539885	37572385	4332	protein_coding	RAB_member_RAS_oncogene_family-like_3	321	395	352	306	267	385	411	482	417	472	414	431	350	450	3.68603	3.71978	3.27295	3.33418	3.5061	3.96384	3.62874	4.56621	4.62309	4.72388
ENSMUSG00000020890	15159.4	14882.9	15751.9	16264.7	15929.9	16531	15030.7	20763.6	22577.1	20598.2	20958	21455.2	21401.8	20180.9	-0.43004	3.8033e-41	4.5267e-39	Gucy2e	chr11	-	69218117	69237036	8331	protein_coding	guanylate_cyclase_2e	14500	17230	18502	16146	13179	17324	18876	22604	20482	21052	17921	22399	17850	20208	86.579	84.3717	89.4553	91.4796	89.9884	92.7458	86.6592	111.349	118.075	109.557
ENSMUSG00000071748	48.0919	40.5977	40.8653	49.3602	35.0533	48.6655	38.2216	62.4635	59.5236	59.685	49.1176	65.1348	59.9489	66.9103	-0.4293	0.00054188	0.0031194	Gm14698	chrX	+	68821093	68825318	4226	protein_coding	predicted_gene_14698	46	47	48	49	29	51	48	68	54	61	42	68	50	67	0.541465	0.453709	0.457505	0.547297	0.390364	0.53825	0.434424	0.660353	0.61369	0.625815
ENSMUSG00000027245	112.911	76.0127	67.2575	95.6984	77.3591	80.1549	93.9615	140.543	125.661	128.176	118.116	144.638	86.3264	98.8674	-0.42917	0.00029294	0.0018185	Hypk	chr2	+	121453290	121458672	4170	protein_coding	huntingtin_interacting_protein_K	108	88	79	95	64	84	118	153	114	131	101	151	72	99	1.28834	0.860906	0.76309	1.07534	0.873062	0.898435	1.0823	1.50575	1.31297	1.36201
ENSMUSG00000097784	107.684	123.521	137.069	95.6984	100.325	126.912	129.794	167.182	128.968	160.465	173.081	168.584	146.275	193.74	-0.42895	1.2807e-05	0.00011219	A430105J06Rik	chr1	+	186749396	186752921	1275	lincRNA	RIKEN_cDNA_A430105J06_gene	103	143	161	95	83	133	163	182	117	164	148	176	122	194	4.01854	4.57546	5.08628	3.51698	3.70313	4.65248	4.88967	5.85812	4.40717	5.57673
ENSMUSG00000097358	41.819	42.3252	38.3112	26.1911	25.3834	38.169	37.4253	58.7892	58.4213	40.1161	47.9482	66.0927	35.9693	53.9277	-0.42873	0.0026847	0.012338	Gm26773	chr14	+	118107831	118117100	2868	lincRNA	predicted_gene_26773	40	49	45	26	21	40	47	64	53	41	41	69	30	54	0.693781	0.696989	0.632001	0.427908	0.416525	0.622048	0.626788	0.915794	0.887526	0.619798
ENSMUSG00000039046	2890.74	2977.45	2833.33	2916.28	2818.77	2881.76	2928.73	3840.59	3959.42	3937.25	3917.72	4068.05	3740.81	3825.87	-0.42815	1.4836e-58	3.0803e-56	Usp6nl	chr2	+	6322667	6446390	7484	protein_coding	USP6_N-terminal_like	2765	3447	3328	2895	2332	3020	3678	4181	3592	4024	3350	4247	3120	3831	18.3782	18.7895	17.9116	18.2588	17.7254	17.9977	18.7966	22.9268	23.0509	23.3115
ENSMUSG00000026933	6814.41	6929.25	6672.12	7259.98	6846.28	6664.31	6982.61	9486.19	10369.2	8836.31	9108.98	9335.36	9164.99	8683.36	-0.42749	3.3736e-31	2.6825e-29	Camsap1	chr2	-	25926838	25983282	7981	protein_coding	calmodulin_regulated_spectrin-associated_protein_1	6518	8022	7837	7207	5664	6984	8769	10327	9407	9031	7789	9746	7644	8695	40.6255	41.0048	39.5528	42.624	40.3708	39.0293	42.0238	53.1024	56.6081	49.0596
ENSMUSG00000021928	1510.71	1556.53	1275.34	1451.59	1443.23	1619.32	1221.5	2030.98	1904.75	1954.93	1902.72	2006.73	1955.53	1877.48	-0.42718	2.62e-15	8.0787e-14	Ebpl	chr14	-	61339763	61360445	2077	protein_coding	emopamil_binding_protein-like	1445	1802	1498	1441	1194	1697	1534	2211	1728	1998	1627	2095	1631	1880	34.6077	35.3938	29.0509	32.7479	32.7016	36.4409	28.2482	43.6867	39.9569	41.7066
ENSMUSG00000023345	87.82	103.654	80.0279	94.691	99.1163	66.7958	88.3875	122.171	127.865	114.478	146.183	131.228	106.709	108.854	-0.42702	3.4948e-05	0.00027883	Poc1a	chr9	+	106281061	106350521	1695	protein_coding	POC1_centriolar_protein_homolog_A_(Chlamydomonas)	84	120	94	94	82	70	111	133	116	117	125	137	89	109	2.4652	2.88815	2.23379	2.61767	2.75198	1.84192	2.5047	3.22017	3.2868	2.99269
ENSMUSG00000024922	58.5466	52.6906	49.3789	76.5587	53.1844	80.1549	59.7213	101.044	98.1037	67.5125	71.3375	90.9972	88.7244	85.8849	-0.42686	0.00052418	0.0030362	Ovol1	chr19	-	5549137	5560575	2900	protein_coding	OVO_homolog-like_1_(Drosophila)	56	61	58	76	44	84	75	110	89	69	61	95	74	86	0.960576	0.858106	0.805591	1.23701	0.86309	1.29189	0.989157	1.55665	1.47393	1.03157
ENSMUSG00000020974	21.955	19.867	13.6218	14.1029	19.3398	18.1303	24.6848	21.1274	30.8641	36.2024	25.7283	28.736	27.5765	26.9638	-0.42641	0.0077708	0.029792	Pole2	chr12	-	69201779	69228190	1695	protein_coding	polymerase_(DNA_directed)_epsilon_2_(p59_subunit)	21	23	16	14	16	19	31	23	28	37	22	30	23	27	0.616299	0.553563	0.38022	0.389866	0.536972	0.499951	0.69951	0.556872	0.793365	0.946407
ENSMUSG00000043421	195.504	192.623	209.435	164.198	199.441	200.387	199.867	302.213	227.071	245.589	252.605	247.129	299.744	283.62	-0.42598	5.1479e-08	6.9504e-07	Hilpda	chr6	+	29272488	29275446	982	protein_coding	hypoxia_inducible_lipid_droplet_associated	187	223	246	163	165	210	251	329	206	251	216	258	250	284	9.47266	9.26408	10.0904	7.83489	9.55815	9.53786	9.77607	13.7493	10.0749	11.0817
ENSMUSG00000086324	21.955	25.9134	21.284	29.2132	21.7572	26.7183	17.5182	29.3946	39.6824	36.2024	38.5924	23.9466	32.3724	40.9451	-0.42597	0.0052905	0.021782	Gm15564	chr16	-	35966752	35983230	545	antisense	predicted_gene_15564	21	30	25	29	18	28	22	32	36	37	33	25	27	41	1.91675	2.24561	1.84769	2.51164	1.87879	2.29142	1.54393	2.40963	3.17242	2.94341
ENSMUSG00000047117	227.914	280.729	221.354	224.639	278.009	251.915	230.922	315.992	298.72	324.843	398.788	332.379	330.918	332.554	-0.4253	1.1712e-08	1.7205e-07	Ankdd1b	chr13	-	96416134	96471198	3003	protein_coding	ankyrin_repeat_and_death_domain_containing_1B	218	325	260	223	230	264	290	344	271	332	341	347	276	333	3.61113	4.41506	3.48741	3.50515	4.35686	3.92096	3.69356	4.70111	4.33409	4.79323
ENSMUSG00000033416	2116.04	2049.75	1884.06	2064.06	2007.71	1854.06	1973.19	3124.09	2946.42	2686.8	2510.85	2478	2442.32	2656.44	-0.42526	1.4071e-15	4.4116e-14	Gucd1	chr10	-	75351111	75517972	3500	protein_coding	guanylyl_cyclase_domain_containing_1	2024	2373	2213	2049	1661	1943	2478	3401	2673	2746	2147	2587	2037	2660	28.7663	27.6591	25.4682	27.6332	26.9962	24.7599	27.0792	39.8782	36.6788	34.0156
ENSMUSG00000099563	31.3643	30.2323	45.9735	33.2426	36.2621	52.4824	62.9064	50.522	85.9785	58.7066	65.4902	62.2613	58.7499	46.9371	-0.4251	0.00406	0.017416	RP24-89C18.2	chr1	+	59155607	59156989	1383	pseudogene	predicted_gene_19125	30	35	54	33	30	55	79	55	78	60	56	65	49	47	1.07905	1.03242	1.57274	1.12629	1.23396	1.77372	2.18478	1.63207	2.70867	1.88094
ENSMUSG00000047757	38.6826	40.5977	17.0272	31.2279	25.3834	20.993	28.6662	50.522	42.9892	43.0515	38.5924	28.736	47.9591	45.9384	-0.42481	0.0059895	0.024089	Fancb	chrX	+	164980592	164997272	2980	protein_coding	Fanconi_anemia_complementation_group_B	37	47	20	31	21	22	36	55	39	44	33	30	40	46	0.617628	0.643414	0.270333	0.491023	0.400871	0.329268	0.462049	0.757432	0.62854	0.640151
ENSMUSG00000036473	5808.66	5764.87	5172.02	5799.32	5312.39	5384.69	5690.24	7730.78	8686.03	7005.65	6994.58	7230.93	7412.08	7430.04	-0.42397	3.8443e-20	1.6363e-18	Tbc1d24	chr17	-	24175431	24205562	7946	protein_coding	TBC1_domain_family_member_24	5556	6674	6075	5757	4395	5643	7146	8416	7880	7160	5981	7549	6182	7440	34.7821	34.2647	30.7951	34.1983	31.4638	31.6741	34.3967	43.4665	47.628	39.067
ENSMUSG00000031788	724.515	714.346	668.318	816.962	768.756	737.616	748.507	1026.97	983.241	996.054	1015.1	1002.89	889.642	1055.58	-0.42334	2.283e-18	8.7779e-17	Kifc3	chr8	-	95099832	95142540	3409	protein_coding	kinesin_family_member_C3	693	827	785	811	636	773	940	1118	892	1018	868	1047	742	1057	10.1123	9.89663	9.27528	11.2292	10.6128	10.1134	10.5464	13.459	12.5667	12.9469
ENSMUSG00000090582	63.774	69.1024	48.5276	40.2941	41.097	46.757	62.9064	83.5909	87.0808	50.879	76.0154	84.2922	80.3315	68.9076	-0.42317	0.0013908	0.0070408	Gm17024	chr12	-	40209487	40211073	634	antisense	predicted_gene_17024	61	80	57	40	34	49	79	91	79	52	65	88	67	69	4.78611	5.14766	3.62135	2.97802	3.05064	3.44707	4.76584	5.89046	5.98442	3.55598
ENSMUSG00000037697	3896.49	3688.34	3902.64	4209.72	3760.38	3675.68	3637.43	5304.81	5741.82	4779.69	5128.11	5068.07	5220.35	4786.58	-0.42232	3.0174e-22	1.4457e-20	Ddhd1	chr14	-	45593174	45658143	5012	protein_coding	DDHD_domain_containing_1	3727	4270	4584	4179	3111	3852	4568	5775	5209	4885	4385	5291	4354	4793	36.9905	34.7557	36.8399	39.3566	35.3094	34.2782	34.8592	47.2866	49.9146	42.2571
ENSMUSG00000039789	646.104	671.157	604.466	629.595	568.106	645.056	680.026	841.42	941.354	821.892	895.812	838.132	823.698	839.874	-0.42212	4.77e-18	1.8006e-16	Zfp597	chr16	-	3858321	3884561	5668	protein_coding	zinc_finger_protein_597	618	777	710	625	470	676	854	916	854	840	766	875	687	841	5.42376	5.59242	5.0456	5.20483	4.71704	5.31937	5.76275	6.63228	7.23623	6.42533
ENSMUSG00000078451	133.821	111.428	122.596	133.978	125.709	147.905	154.479	183.716	154.32	169.271	197.64	162.837	202.627	204.726	-0.42204	3.2863e-06	3.2525e-05	Ppil6	chr10	+	41490439	41514284	1066	protein_coding	peptidylprolyl_isomerase_(cyclophilin)-like_6	128	129	144	133	104	155	194	200	140	173	169	170	169	205	5.97303	4.93675	5.44114	5.88913	5.5498	6.48512	6.9606	7.69963	6.30747	7.03614
ENSMUSG00000030380	265.551	272.955	263.922	252.845	242.956	256.687	253.218	387.641	381.392	277.878	315.756	357.284	368.086	366.509	-0.42196	4.2123e-09	6.6199e-08	Mzf1	chr7	-	13042303	13054764	4015	protein_coding	myeloid_zinc_finger_1	254	316	310	251	201	269	318	422	346	284	270	373	307	367	3.14695	3.21078	3.11	2.95083	2.84782	2.9882	3.02931	4.31344	4.13881	3.06675
ENSMUSG00000086682	69.0014	67.3749	45.9735	69.5072	47.1407	56.2993	83.6098	94.6138	95.8991	67.5125	77.1848	115.902	88.7244	80.8915	-0.42183	0.0011242	0.0058712	Gm16023	chr4	-	155608300	155624755	2490	processed_transcript	predicted_gene_16023	66	78	54	69	39	59	105	103	87	69	66	121	74	81	1.31852	1.27792	0.873532	1.308	0.890977	1.05681	1.61284	1.6976	1.67805	1.20142
ENSMUSG00000098104	2.09095	3.45512	0	4.02941	0	0	2.38885	9.18581	3.30687	1.95689	9.35574	4.78933	3.59693	7.98929	-0.42117	0.0082545	0.031334	Gm6085	chr1	-	4687934	4689403	1470	pseudogene	predicted_gene_6085	2	4	0	4	0	0	3	10	3	2	8	5	3	8	0.0676791	0.111007	0	0.12844	0	0	0.0780559	0.279177	0.0980141	0.0589873
ENSMUSG00000095990	223.732	240.995	171.975	153.117	186.145	218.518	174.386	224.134	308.641	245.589	292.367	267.244	256.581	282.621	-0.42114	7.4737e-06	6.9101e-05	Zfp97	chr17	+	17121415	17146831	2684	protein_coding	zinc_finger_protein_97	214	279	202	152	154	229	219	244	280	251	250	279	214	283	3.96619	4.24063	3.03147	2.67312	3.26392	3.80536	3.12078	3.73082	5.01026	4.0545
ENSMUSG00000003038	4287.5	4243.75	4193.8	3894.42	4225.74	4281.61	4133.51	6011.19	5348.3	5585.93	5399.43	5579.57	5777.87	5550.56	-0.4208	2.1082e-39	2.3448e-37	Hmgn2	chr4	-	133964738	133968650	2159	protein_coding	high_mobility_group_nucleosomal_binding_domain_2	4101	4913	4926	3866	3496	4487	5191	6544	4852	5709	4617	5825	4819	5558	94.4885	92.8331	91.9023	84.5212	92.1128	92.693	91.9603	124.391	107.933	114.644
ENSMUSG00000086154	2.09095	3.45512	0.851361	1.00735	1.20874	2.86268	3.98142	6.43007	5.51144	1.95689	5.84734	6.70506	4.79591	8.98795	-0.42079	0.01336	0.046661	Gm16196	chr17	-	29014642	29015897	464	lincRNA	predicted_gene_16196	2	4	1	1	1	3	5	7	5	2	5	7	4	9	0.214414	0.351683	0.0868094	0.101728	0.122598	0.288368	0.412149	0.619123	0.517531	0.186878
ENSMUSG00000003354	149.503	128.703	100.461	113.831	153.509	130.729	135.368	182.798	167.548	182.969	176.59	171.458	148.673	211.716	-0.42037	9.1872e-06	8.358e-05	Ccdc65	chr15	+	98708207	98723326	1890	protein_coding	coiled-coil_domain_containing_65	143	149	118	113	127	137	170	199	152	187	151	179	124	212	3.76371	3.21613	2.51481	2.82211	3.82246	3.23297	3.44024	4.32104	3.86248	4.28969
ENSMUSG00000024242	3297.43	3231.4	3743.43	3642.58	3525.88	3665.18	3455.87	4309.98	4900.77	4827.64	4832.24	4756.76	4897.82	4474	-0.42027	6.3803e-25	3.6797e-23	Map4k3	chr17	-	80580512	80728093	4231	protein_coding	mitogen-activated_protein_kinase_kinase_kinase_kinase_3	3154	3741	4397	3616	2917	3841	4340	4692	4446	4934	4132	4966	4085	4480	37.0818	36.0706	41.8599	40.3406	39.2188	40.4897	39.2328	45.5105	50.4674	50.5594
ENSMUSG00000022518	180.867	179.666	227.313	261.911	166.806	202.296	264.366	274.656	380.29	277.878	244.419	271.076	303.341	295.604	-0.42017	4.4148e-05	0.00034445	4930562C15Rik	chr16	+	4835416	4867691	3829	protein_coding	RIKEN_cDNA_4930562C15_gene	173	208	267	260	138	212	332	299	345	284	209	283	253	296	2.24751	2.21609	2.80873	3.20512	2.05019	2.46941	3.31631	3.20467	4.32731	3.21572
ENSMUSG00000062778	7.31833	0.86378	4.25681	5.03676	4.83494	0.954225	1.59257	22.0459	11.0229	5.87066	7.0168	0.957865	4.79591	14.9799	-0.42007	0.011683	0.041709	Chia1	chr3	+	106113229	106132120	1681	protein_coding	chitinase_acidic_1	7	1	5	5	4	1	2	24	10	6	6	1	4	15	0.207144	0.0242684	0.119808	0.140397	0.135361	0.0265323	0.0455055	0.585923	0.285704	0.15475
ENSMUSG00000053925	56.4557	42.3252	45.9735	65.4778	33.8446	41.9859	62.9064	83.5909	65.035	59.685	58.4734	68.9663	65.9438	93.8741	-0.41983	0.0020084	0.0096917	Gm9929	chr1	+	170868645	170881721	1671	processed_transcript	predicted_gene_9929	54	49	54	65	28	44	79	91	59	61	50	72	55	94	1.60753	1.19627	1.30167	1.83609	0.953198	1.17441	1.80823	2.23492	1.69574	1.5827
ENSMUSG00000050675	78.4107	67.3749	64.7034	71.5219	51.9756	72.5211	94.7578	108.393	105.82	87.0814	85.3711	99.618	97.1172	114.846	-0.41979	0.00021468	0.0013866	Gp1ba	chr11	+	70639122	70642036	2710	protein_coding	glycoprotein_1b_alpha_polypeptide	75	78	76	71	43	76	119	118	96	89	73	104	81	115	1.37668	1.17418	1.12961	1.23665	0.902611	1.2508	1.6795	1.78694	1.70132	1.42386
ENSMUSG00000086605	8203.85	8370.9	7090.14	8871.74	7709.32	7801.75	8303.65	11624.6	13045.6	9762.9	9790.78	10471.4	9742.89	11626.4	-0.41971	1.7204e-11	3.674e-10	Gm14290	chr2	-	167098794	167101826	1894	lincRNA	predicted_gene_14290	7847	9691	8328	8807	6378	8176	10428	12655	11835	9978	8372	10932	8126	11642	206.094	208.736	177.111	219.485	191.56	192.533	210.583	274.207	300.105	228.407
ENSMUSG00000042606	832.199	792.087	812.198	870.352	849.741	893.155	811.413	1122.51	1049.38	1154.56	1013.93	1249.06	1206.17	1078.55	-0.41951	2.6523e-17	9.4761e-16	Hirip3	chr7	+	126861972	126865377	2766	protein_coding	HIRA_interacting_protein_3	796	917	954	864	703	936	1019	1222	952	1180	867	1304	1006	1080	14.3154	13.5246	13.8925	14.7441	14.4579	15.0927	14.0904	18.1308	16.5299	18.4959
ENSMUSG00000019845	491.374	552.819	612.129	684.999	549.975	651.736	708.693	853.362	745.147	807.215	764.832	910.93	868.06	810.913	-0.41931	3.8794e-09	6.1278e-08	Tube1	chr10	+	39134023	39151058	2929	protein_coding	epsilon-tubulin_1	470	640	719	680	455	683	890	929	676	825	654	951	724	812	7.98216	8.91394	9.88767	10.9584	8.83677	10.4003	11.6218	13.0165	11.0844	12.2118
ENSMUSG00000038679	766.334	718.665	716.846	749.469	673.266	760.517	792.303	864.385	1117.72	921.693	1005.74	1063.23	1023.93	985.678	-0.41905	3.1683e-14	8.916e-13	Trps1	chr15	-	50654752	50890463	9859	protein_coding	trichorhinophalangeal_syndrome_I_(human)	733	832	842	744	557	797	995	941	1014	942	860	1110	854	987	3.69839	3.4427	3.44004	3.56202	3.21384	3.60553	3.86004	3.917	4.93957	4.14251
ENSMUSG00000025195	879.245	850.824	812.198	853.227	768.756	846.398	850.431	1202.42	1215.82	1035.19	1084.1	1168.6	1058.7	1109.51	-0.41882	1.2564e-19	5.1826e-18	Dnmbp	chr19	-	43847967	43912392	4882	protein_coding	dynamin_binding_protein	841	985	954	847	636	887	1068	1309	1103	1058	927	1220	883	1111	8.56919	8.2309	7.87109	8.18921	7.41073	8.10344	8.36711	11.0037	10.8508	9.3958
ENSMUSG00000037936	3306.84	3019.78	3658.3	3805.77	3547.64	3408.49	3141.34	4712.32	4548.04	4673.04	4454.5	4546.99	4746.75	4392.11	-0.41878	4.4585e-20	1.8934e-18	Scarb1	chr5	-	125277087	125341094	3093	protein_coding	scavenger_receptor_class_B_member_1	3163	3496	4297	3778	2935	3572	3945	5130	4126	4776	3809	4747	3959	4398	50.8699	46.1106	55.959	57.6552	53.9796	51.508	48.7831	68.0667	64.0669	66.9468
ENSMUSG00000048503	4159.95	4096.05	4110.37	4313.48	3999.71	4326.46	3914.53	5797.16	5664.66	5720.95	4970.24	5505.81	5426.57	5664.41	-0.41833	1.0958e-30	8.4263e-29	Tmem136	chr9	-	43108653	43116570	3500	protein_coding	transmembrane_protein_136	3979	4742	4828	4282	3309	4534	4916	6311	5139	5847	4250	5748	4526	5672	56.552	55.2716	55.5628	57.7478	53.7812	57.7772	53.7212	73.9992	70.5172	72.4287
ENSMUSG00000063704	71.0924	45.7804	79.1766	43.3161	38.6795	53.4366	51.7585	82.6723	73.8533	74.3616	78.3543	85.25	64.7448	80.8915	-0.4176	0.0013139	0.0067193	Mapk15	chr15	+	75993769	75999152	1929	protein_coding	mitogen-activated_protein_kinase_15	68	53	93	43	32	56	65	90	67	76	67	89	54	81	1.75355	1.12086	1.94194	1.05219	0.943668	1.29479	1.28879	1.91473	1.66812	1.70815
ENSMUSG00000048856	87.82	101.062	75.7711	84.6175	97.9076	95.4225	86.7949	151.566	127.865	82.1892	109.93	142.722	116.301	136.817	-0.41735	0.00021788	0.0014025	Slc25a47	chr12	+	108851129	108856814	1579	protein_coding	solute_carrier_family_25_member_47	84	117	89	84	81	100	109	165	116	84	94	149	97	137	2.6463	3.02282	2.27035	2.51104	2.91813	2.82463	2.64026	4.28843	3.52826	2.30644
ENSMUSG00000074909	1789.85	1922.78	1838.94	1982.47	1943.65	1959.98	2100.6	2557.33	2626.75	2579.17	2579.84	2679.15	2673.72	2448.72	-0.41733	1.189e-29	8.6117e-28	Ranbp6	chr19	-	29808108	29812974	4867	protein_coding	RAN_binding_protein_6	1712	2226	2160	1968	1608	2054	2638	2784	2383	2636	2206	2797	2230	2452	17.4978	18.6583	17.8763	19.0862	18.7943	18.8227	20.7308	23.475	23.5151	23.4817
ENSMUSG00000087370	2098.27	2208.69	1890.87	1920.01	2101.99	1890.32	2138.02	2751.15	3129.4	2528.3	2552.95	2734.71	2619.77	2821.22	-0.41733	1.2942e-16	4.3652e-15	Tmem170b	chr13	+	41606216	41641347	7160	protein_coding	transmembrane_protein_170B	2007	2557	2221	1906	1739	1981	2685	2995	2839	2584	2183	2855	2185	2825	13.9436	14.5689	12.4945	12.5651	13.8162	12.34	14.3428	17.1665	19.0431	15.6468
ENSMUSG00000041578	21694.7	21102.2	21046.5	21891.8	21196.4	22375.6	21029.9	29834.6	30452.9	28395.4	28032.1	28344.2	27534.5	28417.9	-0.41682	4.1681e-53	7.2789e-51	Crx	chr7	-	15865947	15879968	2919	protein_coding	cone-rod_homeobox	20751	24430	24721	21732	17536	23449	26410	32479	27627	29021	23970	29591	22965	28456	353.628	341.427	341.127	351.417	341.742	358.289	346.048	456.631	454.553	431.046
ENSMUSG00000026043	54.3647	48.3717	72.3657	46.3382	58.0193	49.6197	65.2953	85.428	79.3648	65.5556	107.591	46.9354	77.9336	99.8661	-0.4165	0.0026385	0.012173	Col3a1	chr1	+	45311538	45349706	5564	protein_coding	collagen_type_III_alpha_1	52	56	85	46	48	52	82	93	72	67	92	49	65	100	0.464898	0.410591	0.615342	0.390236	0.490745	0.416831	0.563675	0.685951	0.621484	0.522076
ENSMUSG00000072663	56.4557	79.4678	47.6762	45.3308	49.5582	30.5352	39.8142	65.2192	78.2625	69.4694	53.7955	66.0927	67.1428	100.865	-0.41646	0.0044507	0.018837	Spef2	chr15	-	9578193	9748868	5313	protein_coding	sperm_flagellar_2	54	92	56	45	41	32	50	71	71	71	46	69	56	101	0.505587	0.70641	0.424554	0.399788	0.438981	0.268629	0.359942	0.548423	0.641805	0.579381
ENSMUSG00000091784	18.8186	22.4583	18.7299	25.1838	18.131	25.7641	32.6476	45.0105	34.1709	30.3317	26.8977	30.6517	31.1734	38.9478	-0.41634	0.0072227	0.028059	Gm17022	chr8	+	13086509	13087430	922	pseudogene	predicted_gene_17022	18	26	22	25	15	27	41	49	31	31	23	32	26	39	0.971143	1.15041	0.961117	1.27987	0.925469	1.3061	1.70081	2.18103	1.61479	1.45773
ENSMUSG00000050132	2635.64	2527.42	2491.93	2588.89	2728.12	2522.97	2735.24	3772.61	3827.15	3179.94	3299.07	3546.02	3286.4	3508.3	-0.41608	1.7712e-21	8.1718e-20	Sarm1	chr11	-	78472330	78497754	4868	protein_coding	sterile_alpha_and_HEAT/Armadillo_motif_containing_1	2521	2926	2927	2570	2257	2644	3435	4107	3472	3250	2821	3702	2741	3513	25.7611	24.5207	24.219	24.9195	26.3744	24.2245	26.9885	34.6235	34.2542	28.9453
ENSMUSG00000097284	277.051	310.097	244.341	272.992	204.276	258.595	289.051	330.689	416.665	272.985	320.434	436.787	392.066	370.503	-0.41594	1.1424e-05	0.0001018	4930480K23Rik	chr14	+	69732784	69767113	3326	lincRNA	RIKEN_cDNA_4930480K23_gene	265	359	287	271	169	271	363	360	378	279	274	456	327	371	3.96338	4.40333	3.47572	3.84595	2.89045	3.63405	4.17433	4.44199	5.45826	3.63687
ENSMUSG00000083974	5.22738	0.86378	0.851361	1.00735	0	0.954225	3.18514	7.34865	3.30687	6.8491	4.67787	2.8736	5.99489	4.99331	-0.41593	0.010861	0.039399	Gm16053	chr7	+	97406140	97406327	188	pseudogene	predicted_gene_16053	5	1	1	1	0	1	4	8	3	7	4	3	5	5	1.32298	0.216996	0.214253	0.251072	0	0.237239	0.813775	1.74634	0.766387	1.61431
ENSMUSG00000073590	345.007	327.373	299.679	374.735	333.611	347.338	363.902	471.232	466.268	500.963	417.5	448.281	444.821	462.38	-0.41575	2.7745e-12	6.4725e-11	3222401L13Rik	chr18	+	37655907	37658737	2831	protein_coding	RIKEN_cDNA_3222401L13_gene	330	379	352	372	276	364	457	513	423	512	357	468	371	463	5.7985	5.46145	5.00827	6.2024	5.54588	5.73462	6.17417	7.4366	7.17604	7.84108
ENSMUSG00000098088	14.6367	24.1859	20.4327	21.1544	24.1747	18.1303	26.2774	36.7432	48.5007	31.3102	17.542	37.3568	15.5867	37.9491	-0.41575	0.013262	0.046378	Gm26916	chr14	+	61629484	61630414	352	lincRNA	predicted_gene_26916	14	28	24	21	20	19	33	40	44	32	15	39	13	38	1.97846	3.24507	2.74633	2.816	3.23213	2.40743	3.58569	4.66353	6.00336	3.94142
ENSMUSG00000049538	36.5917	42.3252	22.1354	22.1617	20.5485	19.0845	35.0365	44.0919	40.7847	43.0515	49.1176	56.5141	32.3724	27.9625	-0.41568	0.0094151	0.035018	Adamts16	chr13	-	70727802	70841811	5106	protein_coding	a_disintegrin-like_and_metallopeptidase_(reprolysin_type)_with_thrombospondin_type_1_motif_16	35	49	26	22	17	20	44	48	37	44	42	59	27	28	0.34098	0.391493	0.205105	0.203375	0.189395	0.1747	0.32959	0.385796	0.348021	0.373609
ENSMUSG00000068744	24.0459	15.548	19.5813	13.0956	19.3398	27.6725	25.4811	33.9875	26.4549	42.073	25.7283	34.4832	17.9847	33.9545	-0.41529	0.011035	0.039909	Psrc1	chr3	+	108383839	108388231	1687	protein_coding	proline/serine-rich_coiled-coil_1	23	18	23	13	16	29	32	37	24	43	22	36	15	34	0.678195	0.435278	0.549158	0.363735	0.539518	0.766701	0.725499	0.900085	0.683252	1.10509
ENSMUSG00000007570	1546.26	1308.63	1557.99	1671.2	1606.41	1564.93	1642.73	2167.85	2147.26	1987.22	2046.57	2095.81	2142.57	2006.31	-0.41469	6.3089e-19	2.5083e-17	Fance	chr17	+	28313530	28326568	2193	protein_coding	Fanconi_anemia_complementation_group_E	1479	1515	1830	1659	1329	1640	2063	2360	1948	2031	1750	2188	1787	2009	33.5484	28.1827	33.6122	35.7079	34.4737	33.354	35.9801	44.1642	42.6614	40.1529
ENSMUSG00000063590	18.8186	19.0032	17.8786	20.147	26.5922	22.9014	13.5368	26.6388	41.887	23.4826	26.8977	31.6096	26.3775	25.9652	-0.4142	0.0095933	0.035568	Slc22a28	chr19	-	8062209	8131982	2004	protein_coding	solute_carrier_family_22_member_28	18	22	21	20	22	24	17	29	38	24	23	33	22	26	0.446803	0.447851	0.422091	0.471074	0.624491	0.534142	0.324454	0.593878	0.91069	0.519229
ENSMUSG00000032268	26.1369	35.415	28.0949	28.2058	16.9223	23.8556	27.8699	45.929	41.887	30.3317	38.5924	32.5674	49.1581	33.9545	-0.41402	0.0055731	0.022666	Tmprss5	chr9	+	49081260	49117587	2895	protein_coding	transmembrane_protease_serine_5_(spinesin)	25	41	33	28	14	25	35	50	38	31	33	34	41	34	0.429569	0.577756	0.459145	0.456527	0.275094	0.385154	0.462404	0.708791	0.630405	0.464257
ENSMUSG00000100201	66.9105	87.2418	40.014	56.4117	79.7766	75.3838	85.2024	134.113	110.229	74.3616	92.3879	108.239	74.3366	99.8661	-0.41378	0.0028319	0.012925	RP24-327D15.7	chr10	-	80587965	80589790	409	sense_intronic	predicted_gene_29093	64	101	47	56	66	79	107	146	100	76	79	113	62	100	7.78392	10.0741	4.6287	6.46281	9.17956	8.61484	10.006	14.6496	11.7425	8.05631
ENSMUSG00000066892	649.241	532.953	658.102	645.712	581.402	604.979	605.176	921.337	753.965	728.94	863.067	870.7	810.509	792.937	-0.41347	4.391e-12	9.9818e-11	Fbxl12	chr9	-	20618118	20644767	4182	protein_coding	F-box_and_leucine-rich_repeat_protein_12	621	617	773	641	481	634	760	1003	684	745	738	909	676	794	7.38668	6.0188	7.44526	7.23487	6.54278	6.76159	6.95075	9.84269	7.85519	7.72357
ENSMUSG00000025010	488.237	534.68	528.695	517.779	529.426	562.993	519.177	749.562	828.921	638.923	706.358	690.621	675.025	652.126	-0.41334	5.4069e-13	1.3543e-11	Ccnj	chr19	+	40831279	40848572	3819	protein_coding	cyclin_J	467	619	621	514	438	590	652	816	752	653	604	721	563	653	6.08288	6.61226	6.54978	6.35287	6.52418	6.89042	6.5298	8.76875	9.45698	7.41326
ENSMUSG00000041642	10668	9486.9	8919.71	10273	9144.08	9469.73	11163.1	13440.7	15397.9	11522.1	13085.2	14034.6	12620.4	12677	-0.41327	1.5263e-12	3.6565e-11	Kif21b	chr1	+	136131389	136177998	9254	protein_coding	kinesin_family_member_21B	10204	10983	10477	10198	7565	9924	14019	14632	13969	11776	11189	14652	10526	12694	54.8508	48.4173	45.6029	52.0166	46.503	47.83	57.9415	64.889	72.497	55.1714
ENSMUSG00000025008	684.787	595.145	640.224	651.756	678.101	633.606	680.823	906.639	922.615	784.711	854.881	913.804	829.693	886.811	-0.41233	2.2605e-17	8.1543e-16	Tctn3	chr19	-	40596446	40612233	2743	protein_coding	tectonic_family_member_3	655	689	752	647	561	664	855	987	837	802	731	954	692	888	11.8784	10.2471	11.0427	11.1336	11.6343	10.7966	11.9218	14.7669	14.6549	12.6764
ENSMUSG00000031847	398.326	400.794	344.801	383.801	447.232	390.278	383.013	516.243	523.587	448.127	502.871	546.941	595.892	552.26	-0.41201	1.3409e-10	2.5542e-09	1700030J22Rik	chr8	-	116969599	116978943	2971	protein_coding	RIKEN_cDNA_1700030J22_gene	381	464	405	381	370	409	481	562	475	458	430	571	497	553	6.37917	6.37124	5.49082	6.05312	7.08436	6.13994	6.19219	7.76302	7.67848	6.68357
ENSMUSG00000047246	155.776	258.27	252.003	221.617	192.189	201.342	252.422	258.121	289.902	265.158	287.689	314.18	312.933	371.502	-0.41187	2.8633e-05	0.00023344	Hist1h2be	chr13	-	23583742	23621124	2433	protein_coding	histone_cluster_1_H2be	149	299	296	220	159	211	317	281	263	271	246	328	261	372	3.04639	5.01346	4.90043	4.26813	3.71755	3.86798	4.98332	4.73981	5.19156	4.82917
ENSMUSG00000031823	892.836	892.285	922.875	1008.36	962.154	915.102	949.17	1392.57	1279.76	1282.74	1133.21	1249.06	1154.62	1242.33	-0.41169	4.5327e-18	1.718e-16	Zdhhc7	chr8	-	120081095	120101482	2864	protein_coding	zinc_finger_DHHC_domain_containing_7	854	1033	1084	1001	796	959	1192	1516	1161	1311	969	1304	963	1244	14.8329	14.7142	15.2455	16.4975	15.8103	14.9344	15.9186	21.7232	19.469	19.8461
ENSMUSG00000035459	57.5012	56.1457	51.933	45.3308	61.6455	70.6127	55.7399	68.8936	80.4671	74.3616	79.5238	75.6714	82.7295	87.8822	-0.41127	0.0003019	0.001868	Stab2	chr10	-	86841198	87008025	8228	protein_coding	stabilin_2	55	65	61	45	51	74	70	75	73	76	68	79	69	88	0.332514	0.322276	0.298621	0.258152	0.352596	0.401126	0.325391	0.37408	0.426101	0.400465
ENSMUSG00000020604	475.692	513.086	378.004	384.808	409.761	330.162	480.159	663.215	590.827	546.949	488.837	564.183	473.596	711.047	-0.41125	1.2452e-05	0.0001095	Arsg	chr11	+	109473374	109573330	3273	protein_coding	arylsulfatase_G	455	594	444	382	339	346	603	722	536	559	418	589	395	712	6.91524	7.40371	5.46414	5.50902	5.8919	4.71491	7.0465	9.05291	7.86508	7.40477
ENSMUSG00000087141	4068.99	4268.8	3962.23	4121.07	4142.34	3984.84	4392.3	5222.13	5986.53	5560.49	5323.41	5723.25	5303.08	5477.66	-0.41118	7.4242e-31	5.7803e-29	Plcxd2	chr16	-	45959263	46010218	7140	protein_coding	phosphatidylinositol-specific_phospholipase_C_X_domain_containing_2	3892	4942	4654	4091	3427	4176	5516	5685	5431	5683	4552	5975	4423	5485	27.1154	28.2367	26.255	27.0451	27.3034	26.0859	29.548	32.676	36.5314	34.5084
ENSMUSG00000050229	1394.66	1355.27	1187.65	1275.31	1199.07	1151.75	1403.05	1802.26	1909.16	1617.37	1485.22	1763.43	1688.16	1747.66	-0.41111	6.258e-13	1.553e-11	Pigm	chr1	+	172376531	172384099	7569	protein_coding	phosphatidylinositol_glycan_anchor_biosynthesis_class_M	1334	1569	1395	1266	992	1207	1762	1962	1732	1653	1270	1841	1408	1750	8.76716	8.45655	7.4237	7.89499	7.45546	7.11233	8.90368	10.6379	10.9899	9.46848
ENSMUSG00000050973	127.548	158.072	137.069	140.022	139.005	135.5	160.053	194.739	224.867	186.883	166.064	167.626	191.836	221.703	-0.41035	2.4418e-06	2.4798e-05	Gdpgp1	chr7	+	80232867	80241006	3132	protein_coding	GDP-D-glucose_phosphorylase_1	122	183	161	139	115	142	201	212	204	191	142	175	160	222	1.93767	2.38363	2.07056	2.09483	2.08871	2.02213	2.45458	2.77786	3.12819	2.64398
ENSMUSG00000027276	2982.74	3074.19	2695.41	3126.82	2852.62	2885.58	2876.18	4393.57	4464.27	3574.25	3684.99	3732.8	3791.17	3735.99	-0.40929	3.0605e-15	9.4215e-14	Jag1	chr2	-	137081456	137116644	5612	protein_coding	jagged_1	2853	3559	3166	3104	2360	3024	3612	4783	4050	3653	3151	3897	3162	3741	25.2887	25.8714	22.7236	26.1072	23.9219	24.033	24.6168	34.9768	34.6595	28.2213
ENSMUSG00000063714	56.4557	55.2819	58.7439	38.2793	37.4708	41.0317	50.1659	67.975	71.6487	67.5125	59.6428	65.1348	63.5458	74.8996	-0.4088	0.00088945	0.0048119	Sp3os	chr2	+	72979424	72988677	628	antisense	trans-acting_transcription_factor_3_opposite_strand	54	64	69	38	31	43	63	74	65	69	51	68	53	75	4.27736	4.15747	4.42562	2.85615	2.80804	3.05388	3.83692	4.83581	4.97094	4.7636
ENSMUSG00000029056	2247.77	1867.49	2124.15	2519.39	2213.19	2179.45	2228	2988.14	3019.17	2798.35	2920.16	3223.22	2972.27	2619.49	-0.40845	5.207e-14	1.4457e-12	Pank4	chr4	+	154964123	154980938	2706	protein_coding	pantothenate_kinase_4	2150	2162	2495	2501	1831	2284	2798	3253	2739	2860	2497	3365	2479	2623	39.5232	32.5939	37.1388	43.6257	38.4912	37.6454	39.5478	49.3348	48.6126	45.823
ENSMUSG00000037336	398.326	299.732	267.327	320.338	264.713	293.901	365.494	506.138	509.257	318.972	329.79	473.186	400.459	478.359	-0.40825	9.8028e-05	0.00070263	Mfsd2b	chr12	-	4862440	4874359	3486	protein_coding	major_facilitator_superfamily_domain_containing_2B	381	347	314	318	219	308	459	551	462	326	282	494	334	479	5.43675	4.06079	3.62816	4.30582	3.5737	3.94064	5.03602	6.48666	6.36501	4.05449
ENSMUSG00000097960	767.379	666.839	534.655	585.271	667.222	672.729	784.34	848.769	977.73	799.388	956.624	952.118	821.3	929.753	-0.40747	3.5912e-08	4.9378e-07	A330074K22Rik	chr8	-	120204434	120228230	2489	lincRNA	RIKEN_cDNA_A330074K22_gene	734	772	628	581	552	705	985	924	887	817	818	994	685	931	14.6694	12.6532	10.1629	11.0181	12.6158	12.633	15.1361	15.2351	17.1152	14.2312
ENSMUSG00000057315	1850.49	1849.35	1626.1	1754.81	1813.1	1786.31	1888.79	2374.53	2455.9	2323.8	2330.75	2466.5	2401.55	2360.83	-0.40742	8.272e-31	6.4137e-29	Arhgap24	chr5	+	102481391	102897936	4277	protein_coding	Rho_GTPase_activating_protein_24	1770	2141	1910	1742	1500	1872	2372	2585	2228	2375	1993	2575	2003	2364	20.5862	20.4214	17.9878	19.225	19.9505	19.5214	21.2118	24.8038	25.0184	24.0752
ENSMUSG00000045257	76.3197	66.5111	85.1361	90.6616	64.063	75.3838	64.499	83.5909	91.4899	116.435	83.0322	97.7023	121.097	125.831	-0.40721	0.00045089	0.0026607	Morn2	chr17	+	80290212	80297473	644	protein_coding	MORN_repeat_containing_2	73	77	100	90	53	79	81	91	83	119	71	102	101	126	5.6387	4.87768	6.25459	6.5965	4.68157	5.47122	4.81062	5.79899	6.1898	8.01137
ENSMUSG00000020258	31.3643	31.0961	26.3922	25.1838	32.6359	26.7183	31.8514	45.929	40.7847	44.0299	35.084	35.441	37.1683	49.9331	-0.4068	0.003795	0.01648	Glyctk	chr9	-	106152857	106158138	4209	protein_coding	glycerate_kinase	30	36	31	25	27	28	40	50	37	45	30	37	31	50	0.354555	0.348925	0.296666	0.280361	0.36491	0.296703	0.363482	0.487515	0.422189	0.463532
ENSMUSG00000032840	1755.35	1917.59	1784.45	1783.01	1855.41	1824.48	1885.6	2531.61	2614.63	2448.06	2203.28	2402.33	2340.4	2484.67	-0.40645	4.736e-26	2.9499e-24	2410131K14Rik	chr5	+	118245227	118266093	5649	protein_coding	RIKEN_cDNA_2410131K14_gene	1679	2220	2096	1770	1535	1912	2368	2756	2372	2502	1884	2508	1952	2488	14.785	16.0321	14.9453	14.7897	15.4575	15.0959	16.0329	20.0219	20.1664	19.2027
ENSMUSG00000071646	3308.93	3143.3	3408	3571.06	3511.38	3481.97	3295.82	4880.42	4712.28	4510.62	4248.67	4516.34	4384.66	4267.28	-0.40633	2.7795e-26	1.7666e-24	Mta2	chr19	+	8941875	8952303	3135	protein_coding	metastasis-associated_gene_family_member_2	3165	3639	4003	3545	2905	3649	4139	5313	4275	4610	3633	4715	3657	4273	50.2201	47.3536	51.4319	53.3747	52.7121	51.9134	50.4963	69.5503	65.4912	63.7542
ENSMUSG00000085888	67.9559	42.3252	51.933	57.419	42.3057	53.4366	45.3882	79.9165	83.7739	57.7281	73.6764	79.5028	55.153	68.9076	-0.40624	0.0013143	0.0067193	Gm12224	chr11	-	54340369	54353479	726	antisense	predicted_gene_12224	65	49	61	57	35	56	57	87	76	59	63	83	46	69	4.45367	2.75339	3.38437	3.70591	2.74241	3.44029	3.0029	4.9179	5.02761	3.52339
ENSMUSG00000024120	1786.72	1883.04	1938.55	2090.25	1983.54	1957.12	1977.97	2594.07	2787.69	2525.36	2570.49	2739.5	2516.65	2374.82	-0.40599	6.4617e-23	3.2113e-21	Lrpprc	chr17	-	84705247	84790789	4393	protein_coding	leucine-rich_PPR-motif_containing	1709	2180	2277	2075	1641	2051	2484	2824	2529	2581	2198	2860	2099	2378	19.3519	20.2444	20.8779	22.2953	21.2495	20.8232	21.6268	26.3816	27.6485	25.4726
ENSMUSG00000085807	31.3643	37.1426	26.3922	30.2205	29.0097	53.4366	42.9993	67.0564	37.4778	44.0299	42.1008	60.3455	43.1632	64.913	-0.40575	0.0072213	0.028059	Ube4bos2	chr4	+	149338087	149338531	317	antisense	ubiquitination_factor_E4B_opposite_strand_2	30	43	31	30	24	56	54	73	34	45	36	63	36	65	4.70765	5.53373	3.93901	4.46703	4.30679	7.87902	6.51533	9.45063	5.15115	6.15459
ENSMUSG00000039065	917.928	887.103	790.914	878.41	731.285	801.549	847.246	1146.39	1317.23	1074.33	987.03	1119.74	1059.9	1115.5	-0.40565	1.1612e-11	2.52e-10	Fam173b	chr15	+	31601852	31621227	4655	protein_coding	family_with_sequence_similarity_173_member_B	878	1027	929	872	605	840	1064	1248	1195	1098	844	1169	884	1117	9.38246	9.00035	8.0386	8.84206	7.39328	8.04828	8.74227	11.0025	12.3291	10.2265
ENSMUSG00000023913	1706.22	1592.81	1661.01	1673.21	1687.39	1883.64	1621.23	2160.5	2268.51	2399.14	2246.55	2111.14	2275.66	2246.99	-0.40489	7.6251e-24	4.0478e-22	Pla2g7	chr17	+	43568098	43612201	2097	protein_coding	phospholipase_A2_group_VII_(platelet-activating_factor_acetylhydrolase_plasma)	1632	1844	1951	1661	1396	1974	2036	2352	2058	2452	1921	2204	1898	2250	38.7136	35.8733	37.4751	37.3876	37.8694	41.9848	37.1348	46.0295	47.1337	50.6953
ENSMUSG00000020806	442.236	380.063	379.707	415.029	404.926	363.56	445.123	565.846	611.77	458.89	485.329	546.941	583.902	534.284	-0.40473	2.0658e-09	3.398e-08	Rhbdf2	chr11	-	116598165	116627019	3855	protein_coding	rhomboid_5_homolog_2_(Drosophila)	423	440	446	412	335	381	559	616	555	469	415	571	487	535	5.4583	4.65626	4.6601	5.04463	4.94335	4.40802	5.54612	6.55773	6.91438	5.27466
ENSMUSG00000030402	1759.54	1752.61	1999.85	2018.73	1844.53	1950.44	1852.95	2992.74	2380.94	2275.86	2307.36	2505.78	2623.36	2473.68	-0.40446	3.2033e-13	8.2109e-12	Ppm1n	chr7	-	19276807	19280049	1631	protein_coding	protein_phosphatase_Mg2+/Mn2+_dependent_1N_(putative)	1683	2029	2349	2004	1526	2044	2327	3258	2160	2326	1973	2616	2188	2477	51.3301	50.7501	58.0114	57.9963	53.2233	55.8947	54.5688	81.9774	63.604	61.8303
ENSMUSG00000022018	73.1833	76.8765	34.9058	70.5146	60.4368	70.6127	41.4068	107.474	91.4899	95.8874	77.1848	82.3764	63.5458	79.8929	-0.40423	0.0038364	0.016629	Rgcc	chr14	-	79288756	79301645	918	protein_coding	regulator_of_cell_cycle	70	89	41	70	50	74	52	117	83	98	66	86	53	80	3.79312	3.95509	1.79898	3.59925	3.09834	3.59528	2.16652	5.23046	4.3423	4.62838
ENSMUSG00000075359	1.04548	1.72756	0.851361	2.0147	1.20874	0	3.98142	6.43007	4.40915	1.95689	7.0168	5.74719	3.59693	3.99464	-0.40412	0.012398	0.04381	Gm20775	chrY	-	10641257	10643107	1851	pseudogene	predicted_gene_20775	1	2	1	2	1	0	5	7	4	2	6	6	3	4	0.0268742	0.0440791	0.021761	0.0510012	0.0307323	0	0.103316	0.155199	0.103786	0.0468457
ENSMUSG00000014907	328.279	433.618	390.775	415.029	436.354	437.989	406.901	532.777	569.883	622.289	535.616	500.964	471.198	574.23	-0.40358	4.4904e-09	7.0216e-08	Naf1	chr8	+	66860217	66890564	2990	protein_coding	nuclear_assembly_factor_1_homolog_(S._cerevisiae)	314	502	459	412	361	459	511	580	517	636	458	523	393	575	5.22396	6.84922	6.18338	6.50403	6.86811	6.84676	6.5366	7.96075	8.30432	9.22214
ENSMUSG00000051079	32.4098	31.9599	33.2031	22.1617	31.4271	15.2676	31.0551	53.2777	35.2732	30.3317	43.2703	44.0618	34.7704	41.9438	-0.40354	0.0079396	0.030352	Rgs13	chr1	-	144138654	144177372	1545	protein_coding	regulator_of_G-protein_signaling_13	31	37	39	22	26	16	39	58	32	31	37	46	29	42	0.998102	0.976972	1.01677	0.672126	0.957296	0.461886	0.965469	1.54062	0.994732	0.869919
ENSMUSG00000000628	6221.63	7041.54	5219.69	7952.03	6210.48	6433.39	7103.65	9563.35	12135.1	6955.75	8255.27	8661.98	8427.61	8969.97	-0.40314	0.00020352	0.0013251	Hk2	chr6	-	82725025	82774454	5513	protein_coding	hexokinase_2	5951	8152	6131	7894	5138	6742	8921	10411	11009	7109	7059	9043	7029	8982	53.6962	60.3233	44.7948	67.5874	53.0161	54.5436	61.891	77.5	95.9057	55.907
ENSMUSG00000029055	14166.2	11759.5	14913.3	16592.1	14703.1	14353.5	14283.7	19232.3	20605.1	18594.3	19178.1	19562.5	18666.9	18207.6	-0.40285	2.4282e-14	6.8748e-13	Plch2	chr4	-	154983115	155056784	5619	protein_coding	phospholipase_C_eta_2	13550	13614	17517	16471	12164	15042	17938	20937	18693	19004	16399	20423	15569	18232	119.956	98.8406	125.57	138.362	123.146	119.396	122.1	152.916	159.773	146.633
ENSMUSG00000052605	48.0919	43.189	55.3385	53.3896	59.228	55.3451	46.9808	82.6723	42.9892	55.7712	73.6764	88.1236	62.3468	97.8688	-0.40275	0.003435	0.015188	Isoc2b	chr7	-	4844959	4866193	1080	protein_coding	isochorismatase_domain_containing_2b	46	50	65	53	49	58	59	90	39	57	63	92	52	98	2.11873	1.88867	2.42423	2.31637	2.58091	2.39523	2.08944	3.41992	1.7343	2.28822
ENSMUSG00000030323	1400.94	1344.04	1506.06	1548.3	1480.7	1450.42	1445.26	1997.91	1869.48	1876.65	1898.05	1785.46	2083.82	1986.34	-0.40231	1.5836e-22	7.706e-21	Ift122	chr6	+	115853470	115926699	4444	protein_coding	intraflagellar_transport_122	1340	1556	1769	1537	1225	1520	1815	2175	1696	1918	1623	1864	1738	1989	14.9994	14.2838	16.0339	16.3251	15.6806	15.255	15.6208	20.0855	18.3289	18.712
ENSMUSG00000044724	2151.59	1914.14	2221.2	2217.18	2213.19	2304.45	2122.1	2786.97	2837.29	3043.93	2795.03	2753.86	2757.65	3102.84	-0.40194	4.1039e-21	1.8568e-19	Gpr152	chr19	+	4139799	4145738	3922	protein_coding	G_protein-coupled_receptor_152	2058	2216	2609	2201	1831	2415	2665	3034	2574	3111	2390	2875	2300	3107	26.1023	23.05	26.7948	26.4892	26.5572	27.4633	25.9891	31.7472	31.5199	34.3905
ENSMUSG00000030055	1159.43	1169.56	1126.35	1079.88	1212.36	1186.1	1178.5	1551.48	1554.23	1521.48	1507.44	1518.22	1450.76	1635.81	-0.40178	1.0355e-27	6.813e-26	Rab43	chr6	-	87788853	87812164	4605	protein_coding	RAB43_member_RAS_oncogene_family	1109	1354	1323	1072	1003	1243	1480	1689	1410	1555	1289	1585	1210	1638	11.9796	11.9949	11.5722	10.9881	12.39	12.0388	12.2923	15.0521	14.7053	14.6402
ENSMUSG00000071654	745.424	723.848	768.779	908.631	843.697	887.429	727.804	1139.96	901.672	1117.38	971.827	1127.41	1065.89	1134.48	-0.401	5.3428e-10	9.5996e-09	AI462493	chr19	-	8880016	8880933	829	protein_coding	ubiquinol-cytochrome_c_reductase_complex_assembly_factor_3	713	838	903	902	698	930	914	1241	818	1142	831	1177	889	1136	42.7835	41.2381	43.8751	51.3581	47.8963	50.0348	42.169	61.4348	47.3896	59.7252
ENSMUSG00000043415	326.188	392.156	365.234	365.669	414.596	366.422	346.384	442.756	486.109	534.23	554.327	471.27	478.392	464.377	-0.40077	2.2564e-10	4.2164e-09	Otud1	chr2	+	19657752	19660583	2832	protein_coding	OTU_domain_containing_1	312	454	429	363	343	384	435	482	441	546	474	492	399	465	5.48028	6.53991	6.10167	6.0502	6.88973	6.04758	5.87487	6.98475	7.47876	8.35882
ENSMUSG00000097050	1050.7	990.756	961.187	1183.64	1078.19	982.852	1207.17	1507.39	1479.27	1384.5	1306.29	1425.3	1395.61	1400.12	-0.40056	8.314e-14	2.2647e-12	Gm9918	chr15	+	102270563	102274121	2192	lincRNA	predicted_gene_9918	1005	1147	1129	1175	892	1030	1516	1641	1342	1415	1117	1488	1164	1402	22.807	21.3467	20.7462	25.3019	23.1486	20.9575	26.4521	30.7231	29.4033	27.9873
ENSMUSG00000026930	4213.27	3702.16	4276.39	4570.35	4263.21	4167.1	4280.82	5632.74	5643.72	5510.59	5448.55	5993.36	5440.96	5354.82	-0.40041	1.5915e-23	8.2153e-22	Gpsm1	chr2	+	26315515	26348237	3432	protein_coding	G-protein_signalling_modulator_1_(AGS3-like_C._elegans)	4030	4286	5023	4537	3527	4367	5376	6132	5120	5632	4659	6257	4538	5362	58.4117	50.9464	58.9523	62.3991	58.4601	56.7517	59.912	73.325	71.6485	71.1477
ENSMUSG00000066798	1156.3	1110.82	1074.42	1162.48	1068.52	1165.11	1136.3	1516.58	1633.59	1399.17	1546.04	1481.82	1459.16	1400.12	-0.40037	4.1989e-22	1.9914e-20	Zbtb6	chr2	-	37425500	37443171	5077	protein_coding	zinc_finger_and_BTB_domain_containing_6	1106	1286	1262	1154	884	1221	1427	1651	1482	1430	1322	1547	1217	1402	10.8365	10.3334	10.0124	10.7289	9.90482	10.7263	10.7503	13.3456	14.0193	12.2117
ENSMUSG00000018648	277.051	270.363	273.287	262.919	325.15	251.915	277.107	419.792	345.016	350.282	398.788	386.978	346.505	329.558	-0.40009	7.7725e-09	1.1694e-07	Dusp14	chr11	-	84048041	84069261	1571	protein_coding	dual_specificity_phosphatase_14	265	313	321	261	269	264	348	457	313	358	341	404	289	330	8.39096	8.12788	8.23026	7.84189	9.74041	7.49499	8.47237	11.9381	9.56869	9.8799
ENSMUSG00000070997	38.6826	24.1859	26.3922	37.272	29.0097	41.0317	26.2774	55.1149	31.9664	61.6419	49.1176	31.6096	41.9642	44.9397	-0.39995	0.0084497	0.031949	1700055D18Rik	chr4	+	45011687	45015406	3720	antisense	RIKEN_cDNA_1700055D18_gene	37	28	31	37	24	43	33	60	29	63	42	33	35	45	0.494767	0.307061	0.335663	0.469478	0.367003	0.515548	0.339292	0.66192	0.374403	0.734249
ENSMUSG00000022012	696.287	719.529	765.374	737.381	697.44	688.951	684.804	995.742	990.957	911.908	972.997	946.371	889.642	901.791	-0.39932	7.3775e-20	3.0979e-18	Enox1	chr14	+	77156763	77721760	3495	protein_coding	ecto-NOX_disulfide-thiol_exchanger_1	666	833	899	732	577	722	860	1084	899	932	832	988	742	903	9.47914	9.72314	10.3609	9.886	9.39139	9.21368	9.41138	12.7286	12.3537	11.5615
ENSMUSG00000048617	8812.32	8977.27	8860.11	9653.45	9808.89	9599.51	7938.15	12538.6	12427.2	11973.2	12370.6	11422.5	11386.7	12137.7	-0.39916	2.7205e-20	1.1767e-18	Rtbdn	chr8	+	84946991	84956603	2322	protein_coding	retbindin	8429	10393	10407	9583	8115	10060	9969	13650	11274	12237	10578	11925	9497	12154	180.574	182.594	180.529	194.803	198.805	193.232	164.207	241.25	233.185	228.485
ENSMUSG00000078963	586.512	538.135	503.154	529.867	611.62	519.099	481.752	715.575	890.649	672.19	674.783	669.548	678.621	710.048	-0.39846	3.5144e-09	5.5795e-08	Hsbp1l1	chr18	-	80229758	80247102	1251	protein_coding	heat_shock_factor_binding_protein_1-like_1	561	623	591	526	506	544	605	779	808	687	577	699	566	711	22.3073	20.3161	19.0289	19.8466	23.0088	19.3948	18.4969	25.5551	31.0198	23.8092
ENSMUSG00000040140	62.7286	44.9166	51.0817	64.4705	47.1407	53.4366	60.5176	76.2422	112.433	58.7066	58.4734	72.7978	73.1376	80.8915	-0.39837	0.0023197	0.010908	Tdrd6	chr17	-	43615335	43630299	7062	protein_coding	tudor_domain_containing_6	60	52	60	64	39	56	76	83	102	60	50	76	61	81	0.422635	0.300389	0.342222	0.427769	0.314151	0.353674	0.411612	0.482333	0.693676	0.368357
ENSMUSG00000078440	2968.11	2866.02	2979.76	2946.5	3097.99	2969.55	2670.74	3887.43	3747.78	4110.44	3766.85	3796.98	3610.12	4149.44	-0.39771	1.6568e-24	9.214e-23	Dohh	chr10	+	81384428	81391560	1758	protein_coding	deoxyhypusine_hydroxylase/monooxygenase	2839	3318	3500	2925	2563	3112	3354	4232	3400	4201	3221	3964	3011	4155	80.3319	76.9957	80.1925	78.5351	82.9337	78.9522	72.9703	98.7925	92.8848	103.605
ENSMUSG00000004127	185.049	190.032	143.029	183.338	142.631	136.454	210.219	244.343	207.23	218.193	235.063	248.087	190.637	262.648	-0.39717	4.3247e-05	0.00033826	Trmt10a	chr3	+	138143448	138159821	4258	protein_coding	tRNA_methyltransferase_10A	177	220	168	182	118	143	264	266	188	223	201	259	159	263	2.0678	2.10778	1.58924	2.01754	1.57644	1.49787	2.37138	2.56373	2.12049	2.27062
ENSMUSG00000097158	38.6826	35.415	35.7572	43.3161	16.9223	33.3979	46.9808	52.3591	60.6259	44.0299	52.626	57.4719	45.5612	42.9424	-0.39687	0.0054454	0.022265	Gm26516	chr4	-	130774817	130779246	1397	lincRNA	predicted_gene_26516	37	41	42	43	14	35	59	57	55	45	45	60	38	43	1.31749	1.19728	1.21098	1.45288	0.570076	1.11742	1.61532	1.67446	1.89082	1.39657
ENSMUSG00000027487	144.276	159.799	149.84	158.154	158.344	183.211	210.219	236.994	169.752	265.158	169.573	196.362	380.076	191.743	-0.39605	0.0021652	0.010298	Cdk5rap1	chr2	-	154335380	154373010	2160	protein_coding	CDK5_regulatory_subunit_associated_protein_1	138	185	176	157	131	192	264	258	154	271	145	205	317	192	3.1781	3.49403	3.28204	3.43086	3.45	3.96452	4.67468	4.90188	3.42414	5.43953
ENSMUSG00000096696	155.776	171.029	171.975	120.882	169.223	193.708	168.016	223.215	246.913	181.012	244.419	204.983	218.214	228.693	-0.39596	1.0369e-05	9.3285e-05	Zfp960	chr17	+	17064113	17089628	2667	protein_coding	zinc_finger_protein_960	149	198	202	120	140	203	211	243	224	185	209	214	182	229	2.77911	3.02866	3.05079	2.12381	2.98611	3.39482	3.02595	3.73921	4.03375	3.00742
ENSMUSG00000031196	102.457	117.474	144.731	117.86	119.665	105.919	144.127	141.461	180.775	159.486	159.048	162.837	155.867	191.743	-0.39573	3.072e-05	0.00024822	F8	chrX	-	75172715	75382615	9784	protein_coding	coagulation_factor_VIII	98	136	170	117	99	111	181	154	164	163	136	170	130	192	0.498255	0.567063	0.699869	0.564451	0.575599	0.505999	0.707561	0.645954	0.80503	0.722299
ENSMUSG00000027496	29.2733	28.5048	23.8381	36.2646	41.097	33.3979	58.925	48.6848	51.8076	55.7712	49.1176	32.5674	58.7499	63.9143	-0.39551	0.010143	0.037235	Aurka	chr2	-	172356190	172370535	1905	protein_coding	aurora_kinase_A	28	33	28	36	34	35	74	53	47	57	42	34	49	64	0.731147	0.706688	0.592035	0.891999	1.01528	0.819439	1.48573	1.14177	1.18492	1.29726
ENSMUSG00000089769	30.3188	25.9134	23.8381	41.3014	35.0533	28.6268	41.4068	25.7203	51.8076	49.9006	54.965	47.8933	38.3673	53.9277	-0.39547	0.0090771	0.033983	Gm16574	chr17	+	12818793	12819537	745	pseudogene	predicted_gene_16574	29	30	28	41	29	30	52	28	47	51	47	50	32	54	1.93635	1.64276	1.51386	2.59767	2.21433	1.79601	2.66962	1.54241	3.02988	2.96797
ENSMUSG00000097620	14.6367	21.5945	17.8786	17.125	16.9223	20.0387	24.6848	32.1503	31.9664	26.4179	30.4061	30.6517	17.9847	23.9679	-0.39531	0.013269	0.046387	4921514A10Rik	chr4	+	141115660	141118087	2116	antisense	RIKEN_cDNA_4921514A10_gene	14	25	21	17	14	21	31	35	29	27	26	32	15	24	0.32912	0.481985	0.39975	0.379219	0.376369	0.442636	0.560335	0.678812	0.658214	0.553215
ENSMUSG00000060288	219.55	186.577	181.34	211.544	180.102	202.296	208.626	264.551	286.595	222.106	267.808	271.076	256.581	282.621	-0.39503	7.8852e-08	1.0347e-06	Ppih	chr4	-	119300010	119320546	1288	protein_coding	peptidyl_prolyl_isomerase_H	210	216	213	210	149	212	262	288	260	227	229	283	214	283	8.11045	6.84143	6.66114	7.69591	6.5807	7.34114	7.78014	9.17643	9.69487	7.6411
ENSMUSG00000042050	994.248	1048.63	987.579	1183.64	1043.14	987.623	1097.28	1438.5	1632.49	1263.17	1350.73	1374.54	1268.52	1392.13	-0.39481	3.1115e-12	7.2047e-11	Wdr60	chr12	-	116207050	116263025	3725	protein_coding	WD_repeat_domain_60	951	1214	1160	1175	863	1035	1378	1566	1481	1291	1155	1435	1058	1394	12.6998	13.2954	12.5434	14.8891	13.1791	12.3925	14.149	17.2529	19.0947	15.0261
ENSMUSG00000100937	128.594	109.7	121.745	153.117	113.621	128.82	131.387	167.182	180.775	143.831	176.59	166.669	205.025	152.795	-0.39415	1.674e-05	0.00014375	1700020D05Rik	chr19	-	5502767	5503787	1021	protein_coding	RIKEN_cDNA_1700020D05_gene	123	127	143	152	94	135	165	182	164	147	151	174	171	153	5.99268	5.07443	5.6415	7.02707	5.23725	5.89727	6.18102	7.31548	7.71441	6.24219
ENSMUSG00000039765	2507.05	2409.08	1793.82	2250.42	2025.84	2177.54	2615	3294.03	3770.93	2447.08	2796.2	3110.19	2550.23	3275.61	-0.39404	7.6549e-05	0.00056381	Cc2d2a	chr5	+	43662379	43740972	5451	protein_coding	coiled-coil_and_C2_domain_containing_2A	2398	2789	2107	2234	1676	2282	3284	3586	3421	2501	2391	3247	2127	3280	21.8834	20.8728	15.5694	19.3448	17.4904	18.6717	23.0425	26.998	30.1413	19.8922
ENSMUSG00000097573	20.9095	21.5945	17.8786	26.1911	29.0097	19.0845	29.4625	30.3132	41.887	25.4395	38.5924	37.3568	27.5765	32.9558	-0.39404	0.010481	0.038237	G730003C15Rik	chr1	+	59119833	59122141	2309	antisense	RIKEN_cDNA_G730003C15_gene	20	25	21	26	24	20	37	33	38	26	33	39	23	33	0.430872	0.441698	0.366336	0.531503	0.591274	0.386322	0.612886	0.586526	0.790395	0.488197
ENSMUSG00000020732	116.048	115.747	119.191	147.073	143.84	125.004	146.516	183.716	207.23	187.861	163.725	158.048	135.484	186.75	-0.39395	3.2559e-05	0.00026201	Rab37	chr11	+	115091431	115162236	2608	protein_coding	RAB37_member_RAS_oncogene_family	111	134	140	146	119	131	184	200	188	192	140	165	113	187	2.11718	2.09607	2.16225	2.64242	2.59562	2.2403	2.69844	3.14716	3.46206	3.19183
ENSMUSG00000016356	595.921	547.637	493.789	611.462	484.703	544.863	689.582	808.351	889.547	628.16	646.715	906.141	630.662	802.923	-0.39379	1.0238e-05	9.2286e-05	Col20a1	chr2	+	180986535	181017540	4189	protein_coding	collagen_type_XX_alpha_1	570	634	580	607	401	571	866	880	807	642	553	946	526	804	6.76872	6.1743	5.57702	6.83967	5.44547	6.07952	7.90696	8.62123	9.25226	6.64462
ENSMUSG00000023982	8734.95	9339.19	10985.1	11266.2	11078.1	11704.5	7997.88	13511.4	11984.1	14760.8	13689.8	14304.8	14319.4	11969	-0.39364	7.7916e-08	1.0231e-06	Guca1a	chr17	-	47394560	47400584	871	protein_coding	guanylate_cyclase_activator_1a_(retina)	8355	10812	12903	11184	9165	12266	10044	14709	10872	15086	11706	14934	11943	11985	477.167	506.404	596.701	606.088	598.571	628.099	441.053	693.046	599.481	750.934
ENSMUSG00000036181	1030.84	1040.86	1540.11	1231.99	1566.52	1451.38	1583.81	1674.57	1566.35	1733.8	1841.91	1988.53	1782.88	2164.1	-0.39348	0.00017537	0.001163	Hist1h1c	chr13	+	23738808	23740367	1560	protein_coding	histone_cluster_1_H1c	986	1205	1809	1223	1296	1521	1989	1823	1421	1772	1575	2076	1487	2167	31.4408	31.5117	46.7088	37.0048	47.2587	43.4858	48.7655	47.9578	43.7476	49.2476
ENSMUSG00000067219	113.957	149.434	126.001	134.985	158.344	136.454	197.478	190.146	184.082	178.077	221.029	181.994	208.622	206.723	-0.39164	6.9664e-05	0.00051904	Nipal1	chr5	+	72647796	72671078	4205	protein_coding	NIPA-like_domain_containing_1	109	173	148	134	131	143	248	207	167	182	189	190	174	207	1.28944	1.67837	1.41769	1.50416	1.77218	1.51675	2.25573	2.02023	1.90737	1.87651
ENSMUSG00000037313	141.139	173.62	105.569	105.772	123.291	106.873	130.591	193.821	221.56	150.68	136.828	177.205	176.25	147.802	-0.3915	0.000599	0.0034032	Tacc3	chr5	+	33658128	33678995	2899	protein_coding	transforming_acidic_coiled-coil_containing_protein_3	135	201	124	105	102	112	164	211	201	154	117	185	147	148	2.31647	2.8285	1.72289	1.70961	2.00149	1.72311	2.1637	2.98697	3.32991	2.30313
ENSMUSG00000050332	598.012	551.092	535.506	600.381	556.018	562.039	621.101	657.704	803.568	804.28	755.476	774.913	809.31	712.045	-0.391	1.0473e-12	2.5383e-11	Amer1	chrX	-	95420318	95444872	8496	protein_coding	APC_membrane_recruitment_1	572	638	629	596	460	589	780	716	729	822	646	809	675	713	3.34906	3.06348	2.98209	3.31122	3.07996	3.09203	3.51141	3.45856	4.12095	4.19472
ENSMUSG00000086075	72.1378	59.6009	76.6225	62.4558	48.3494	52.4824	53.351	92.7767	61.7282	67.5125	76.0154	92.9129	89.9233	100.865	-0.39076	0.0017462	0.008573	Gm15728	chr5	+	117389139	117393498	3492	processed_transcript	predicted_gene_15728	69	69	90	62	40	55	67	101	56	69	65	97	75	101	0.982916	0.80609	1.03813	0.838058	0.651609	0.702476	0.733842	1.18698	0.770191	0.856684
ENSMUSG00000028496	755.879	761.854	788.36	806.888	711.945	731.891	751.692	870.815	1100.08	1053.78	1040.83	1044.07	1063.49	845.866	-0.39034	2.8475e-11	5.9319e-10	Mllt3	chr4	-	87769925	88033364	6069	protein_coding	myeloid/lymphoid_or_mixed-lineage_leukemia_(trithorax_homolog_Drosophila);_translocated_to_3	723	882	926	801	589	767	944	948	998	1077	890	1090	887	847	5.92602	5.92871	6.1458	6.22977	5.52077	5.63666	5.94918	6.41045	7.89765	7.69386
ENSMUSG00000097791	47.0464	36.2788	27.2436	26.1911	19.3398	32.4437	24.6848	44.0919	38.5801	36.2024	66.6596	42.1461	37.1683	39.9464	-0.3901	0.011424	0.040935	Gm17315	chr17	+	79354699	79358022	2504	lincRNA	predicted_gene_17315	45	42	32	26	16	34	31	48	35	37	57	44	31	40	0.893964	0.684264	0.514755	0.490112	0.363485	0.605603	0.47351	0.786691	0.671302	0.640639
ENSMUSG00000083907	40.7736	50.0993	68.9602	94.691	94.2814	73.4753	61.3139	86.3466	98.1037	87.0814	87.71	99.618	95.9182	106.857	-0.38956	0.0029683	0.01345	Plk-ps1	chr5	+	35554184	35555971	1788	pseudogene	polo-like_kinase_pseudogene_1	39	58	81	94	78	77	77	94	89	89	75	104	80	107	1.08502	1.32333	1.82474	2.48152	2.48158	1.92073	1.64712	2.15753	2.3906	2.15808
ENSMUSG00000020930	60.6376	57.0095	65.5548	64.4705	47.1407	70.6127	58.925	65.2192	102.513	86.1029	79.5238	80.4607	62.3468	103.861	-0.38926	0.0014591	0.0073511	Ccdc103	chr11	+	102881204	102885216	1841	protein_coding	coiled-coil_domain_containing_103	58	66	77	64	39	74	74	71	93	88	68	84	52	104	1.56717	1.46251	1.6847	1.6409	1.20507	1.79276	1.53738	1.58271	2.42613	2.0724
ENSMUSG00000026721	1484.58	1570.35	1366.43	1300.49	1318.73	1324.46	1439.68	1794.91	2138.44	1797.4	1734.32	1864.96	1639	1962.37	-0.38917	4.6071e-12	1.0448e-10	Rabgap1l	chr1	-	160219174	160792938	6338	protein_coding	RAB_GTPase_activating_protein_1-like	1420	1818	1605	1291	1091	1388	1808	1954	1940	1837	1483	1947	1367	1965	11.1449	11.7017	10.2002	9.61459	9.79206	9.76744	10.9106	12.6523	14.7006	12.5662
ENSMUSG00000072809	47.0464	51.8268	47.6762	47.3455	37.4708	47.7113	55.7399	67.975	66.1373	76.3185	46.7787	56.5141	62.3468	83.8875	-0.38909	0.0022364	0.010583	9330160F10Rik	chr11	-	69057718	69060483	2766	antisense	RIKEN_cDNA_9330160F10_gene	45	60	56	47	31	50	70	74	60	78	40	59	52	84	0.809286	0.884928	0.815493	0.802052	0.637545	0.806234	0.967939	1.09793	1.0418	1.22261
ENSMUSG00000049764	670.15	690.161	658.102	680.969	528.217	649.827	670.471	888.268	903.877	794.495	861.897	943.497	888.443	735.015	-0.38898	2.8469e-10	5.2933e-09	Zfp280b	chr10	+	76032654	76043234	5097	protein_coding	zinc_finger_protein_280B	641	799	773	676	437	681	842	967	820	812	737	985	741	736	6.25583	6.39501	6.10871	6.26021	4.87717	5.95903	6.31829	7.7859	7.72652	6.90696
ENSMUSG00000020435	12746.4	12914.4	13652.4	13812.8	14251	14183.6	12990.6	18008.8	18081.9	17843.9	17608.7	17847.9	18087.8	16551.8	-0.38855	3.1191e-33	2.7235e-31	Osbp2	chr11	-	3703731	3863903	4097	protein_coding	oxysterol_binding_protein_2	12192	14951	16036	13712	11790	14864	16314	19605	16404	18237	15057	18633	15086	16574	148.03	148.872	157.657	157.976	163.7	161.813	152.299	196.38	192.295	192.989
ENSMUSG00000040712	2767.37	2612.94	2508.11	2860.88	2703.94	2602.17	2771.86	3761.59	3846.99	3203.42	3538.81	3666.71	3257.62	3463.36	-0.3884	2.6122e-18	1.0023e-16	Camta2	chr11	-	70669463	70688105	4632	protein_coding	calmodulin_binding_transcription_activator_2	2647	3025	2946	2840	2237	2727	3481	4095	3490	3274	3026	3828	2717	3468	28.4267	26.6419	25.6182	28.9405	27.4725	26.2579	28.7434	36.2813	36.1861	30.6447
ENSMUSG00000079553	218.504	193.487	223.057	234.713	204.276	224.243	217.386	259.04	310.845	251.46	263.13	321.843	264.974	338.546	-0.3881	7.0793e-07	7.8928e-06	Kifc1	chr17	-	33875666	33890661	2350	protein_coding	kinesin_family_member_C1	209	224	262	233	169	235	273	282	282	257	225	336	221	339	4.42405	3.88856	4.49074	4.67999	4.09091	4.46009	4.44321	4.92468	5.76323	4.74145
ENSMUSG00000002957	7780.43	7862.99	7456.22	7709.26	7884.58	7722.54	7345.72	10271.6	10576.5	9737.46	10118.2	9631.34	9486.31	10665.7	-0.38804	5.3529e-34	4.9764e-32	Ap2a2	chr7	+	141562180	141633011	4639	protein_coding	adaptor-related_protein_complex_2_alpha_2_subunit	7442	9103	8758	7653	6523	8093	9225	11182	9595	9952	8652	10055	7912	10680	79.8008	80.0514	76.044	77.8689	79.9879	77.8088	76.0579	98.9218	99.3356	93.0104
ENSMUSG00000097242	112.911	154.617	94.5011	121.89	90.6552	99.2394	135.368	164.426	181.878	113.499	120.455	193.489	142.678	188.747	-0.38754	0.0017319	0.0085186	Gm16907	chr13	-	63289601	63297147	2317	lincRNA	predicted_gene_16907	108	179	111	121	75	104	170	179	165	116	103	202	119	189	2.31867	3.15163	1.92966	2.46499	1.84135	2.00194	2.80624	3.17047	3.42013	2.17059
ENSMUSG00000045064	299.006	235.812	302.233	269.97	285.262	302.489	270.737	347.224	348.323	319.951	401.127	386.978	426.836	372.501	-0.38751	8.7486e-08	1.1392e-06	Zc2hc1c	chr12	+	85288591	85299358	4482	protein_coding	zinc_finger_C2HC-type_containing_1C	286	273	355	268	236	317	340	378	316	327	343	404	356	373	3.17421	2.48485	3.19037	2.82241	2.99531	3.1545	2.90141	3.46112	3.3861	3.16316
ENSMUSG00000005225	1951.9	1805.3	1611.63	1615.79	1596.74	1756.73	1786.06	2234.91	2687.38	2244.55	2156.5	2256.73	2159.36	2222.02	-0.38744	7.7414e-13	1.9034e-11	Plekha8	chr6	+	54595111	54645839	6739	protein_coding	pleckstrin_homology_domain_containing_family_A_(phosphoinositide_binding_specific)_member_8	1867	2090	1893	1604	1321	1841	2243	2433	2438	2294	1844	2356	1801	2225	13.7813	12.652	11.3146	11.2348	11.1509	12.1843	12.7302	14.8164	17.3749	14.7585
ENSMUSG00000100075	40.7736	81.1954	82.582	67.4925	74.9416	64.8873	77.2395	100.125	121.252	75.3401	107.591	94.8287	70.7397	101.863	-0.3866	0.002584	0.011963	RP23-18G1.2	chr19	+	29046245	29048729	2485	antisense	RIKEN_cDNA_1700018L02_gene	39	94	97	67	62	68	97	109	110	77	92	99	59	102	0.780692	1.54316	1.57228	1.27264	1.41928	1.22047	1.49296	1.8001	2.12594	1.34341
ENSMUSG00000037795	1831.67	1812.21	1716.34	2042.91	1651.13	1688.02	2030.52	2526.1	3034.6	2128.11	2244.21	2470.33	2236.09	2236	-0.38659	1.9237e-08	2.7419e-07	N4bp2	chr5	+	65763521	65830108	9055	protein_coding	NEDD4_binding_protein_2	1752	2098	2016	2028	1366	1769	2550	2750	2753	2175	1919	2579	1865	2239	9.6247	9.45205	8.96781	10.5715	8.58151	8.7133	10.7709	12.4635	14.6017	10.414
ENSMUSG00000030064	3998.95	3868.87	4470.5	4442.42	4132.67	4352.22	3929.66	5065.97	5510.34	5505.7	5736.24	5909.07	5311.47	5270.93	-0.38653	1.3695e-19	5.6365e-18	Frmd4b	chr6	-	97286867	97617541	4913	protein_coding	FERM_domain_containing_4B	3825	4479	5251	4410	3419	4561	4935	5515	4999	5627	4905	6169	4430	5278	38.7281	37.1915	43.0507	42.369	39.5871	41.4054	38.4187	46.0676	48.8676	49.6565
ENSMUSG00000091908	161.003	97.6072	159.205	144.051	158.344	155.539	115.461	180.96	199.514	171.227	203.487	220.309	154.668	193.74	-0.38613	0.00020232	0.0013187	Gm17231	chr9	+	57777865	57834295	663	protein_coding	predicted_gene_17231	154	113	187	143	131	163	145	197	181	175	174	230	129	194	11.5544	6.95302	11.3609	10.1807	11.2398	10.9652	8.36482	12.1941	13.1114	11.4438
ENSMUSG00000084907	129.639	137.341	89.3929	113.831	87.029	88.7429	99.5355	224.134	178.571	90.0167	111.099	156.132	134.286	135.818	-0.38575	0.0053246	0.021906	Gm14505	chrX	+	14796735	14839980	831	lincRNA	predicted_gene_14505	124	159	105	113	72	93	125	244	162	92	95	163	112	136	7.42271	7.80558	5.08947	6.41851	4.92871	4.99143	5.75322	12.05	9.36264	4.7999
ENSMUSG00000052446	418.19	441.392	458.032	408.985	401.3	377.873	424.419	602.589	640.43	492.157	554.327	548.857	487.984	539.277	-0.38557	2.0178e-09	3.3278e-08	Zfp961	chr8	+	71951038	71993408	2689	protein_coding	zinc_finger_protein_961	400	511	538	406	332	396	533	656	581	503	474	573	407	540	7.39965	7.75245	8.0589	7.12676	7.02342	6.56822	7.58121	10.0118	10.377	8.11004
ENSMUSG00000029166	4693.14	4419.96	5133.71	5271.47	4850.66	5026.86	5026.94	6799.34	6223.52	6344.22	6444.93	6699.31	6406.14	6184.71	-0.38553	1.0933e-23	5.7225e-22	Mapre3	chr5	+	30814641	30866106	2442	protein_coding	microtubule-associated_protein_RP/EB_family_member_3	4489	5117	6030	5233	4013	5268	6313	7402	5646	6484	5511	6994	5343	6193	91.442	85.4828	99.4618	101.149	93.4813	96.2151	98.8763	124.394	111.04	115.118
ENSMUSG00000073867	57.5012	69.9662	63.0007	64.4705	77.3591	69.6584	67.6841	92.7767	87.0808	72.4047	111.099	77.5871	95.9182	96.8701	-0.38539	0.0004916	0.0028751	AA474408	chr7	-	110057987	110061325	3339	protein_coding	expressed_sequence_AA474408	55	81	74	64	64	73	85	101	79	74	95	81	80	97	0.819385	0.989641	0.892688	0.904732	1.09035	0.975101	0.973654	1.24137	1.13631	0.960862
ENSMUSG00000079550	10634.6	10292.8	10602.9	12159.7	10250.1	10581.4	10385.9	15138.2	14724.4	12353.8	14048.8	14667.8	13885.4	13454	-0.38532	6.4665e-17	2.2376e-15	Mpp4	chr1	-	59120935	59163389	3531	protein_coding	membrane_protein_palmitoylated_4_(MAGUK_p55_subfamily_member_4)	10172	11916	12454	12071	8480	11089	13043	16480	13358	12626	12013	15313	11581	13472	143.301	137.671	142.068	161.362	136.615	140.068	141.28	191.539	181.689	155.029
ENSMUSG00000034295	2146.36	2339.12	2468.95	2611.05	2537.14	2533.47	2503.52	2919.25	3072.08	3041.98	3442.91	3277.82	3249.23	3490.32	-0.38491	1.4283e-15	4.4704e-14	Fhod3	chr18	+	24709445	25133500	5408	protein_coding	formin_homology_2_domain_containing_3	2053	2708	2900	2592	2099	2655	3144	3178	2787	3109	2944	3422	2710	3495	18.884	20.4278	21.5996	22.6232	22.0789	21.8963	22.2356	24.1165	24.7505	24.9247
ENSMUSG00000026650	48.0919	44.9166	35.7572	43.3161	45.932	48.6655	38.2216	65.2192	45.1938	52.8359	47.9482	73.7556	46.7601	85.8849	-0.38484	0.0056344	0.022878	Meig1	chr2	-	3409043	3422648	706	protein_coding	meiosis_expressed_gene_1	46	52	42	43	38	51	48	71	41	54	41	77	39	86	3.24112	3.00474	2.39623	2.87488	3.06182	3.22188	2.60039	4.12715	2.7891	3.31615
ENSMUSG00000032192	9556.7	9701.98	9639.11	10077.5	10234.4	9824.7	8702.59	13037.4	12477.9	12270.6	12713.3	12963.8	13146.8	12028.9	-0.38466	3.957e-28	2.6986e-26	Gnb5	chr9	+	75311395	75344964	1188	protein_coding	guanine_nucleotide_binding_protein_(G_protein)_beta_5	9141	11232	11322	10004	8467	10296	10929	14193	11320	12541	10871	13534	10965	12045	382.753	385.7	383.876	397.479	405.429	386.541	351.857	490.292	457.63	457.679
ENSMUSG00000085482	36.5917	39.7339	55.3385	37.272	45.932	41.9859	36.6291	62.4635	78.2625	44.0299	53.7955	59.3877	43.1632	62.9156	-0.38434	0.0049003	0.020435	A230083N12Rik	chr4	-	74250324	74251714	572	antisense	RIKEN_cDNA_A230083N12_gene	35	46	65	37	38	44	46	68	71	45	46	62	36	63	3.04378	3.28073	4.57722	3.05325	3.7791	3.43084	3.07584	4.87876	5.96138	3.41085
ENSMUSG00000036390	247.778	238.403	211.138	190.389	252.626	247.144	188.719	293.946	316.357	309.188	252.605	326.632	327.321	256.656	-0.38339	4.4832e-06	4.3249e-05	Gadd45a	chr6	-	67035096	67037457	1223	protein_coding	growth_arrest_and_DNA-damage-inducible_45_alpha	237	276	248	189	209	259	237	320	287	316	216	341	273	257	9.6397	9.20644	8.16789	7.29444	9.72123	9.44532	7.4118	10.7379	11.2704	11.2023
ENSMUSG00000064302	4542.59	4741.29	4223.6	4668.07	4629.46	4573.6	5070.74	6167.35	6534.37	5699.43	6280.04	6266.36	5699.94	5831.18	-0.3833	2.2074e-20	9.5924e-19	Clasp1	chr1	+	118389058	118612678	10265	protein_coding	CLIP_associating_protein_1	4345	5489	4961	4634	3830	4793	6368	6714	5928	5825	5370	6542	4754	5839	21.0558	21.8144	19.4668	21.3085	21.2247	20.8253	23.7272	26.8423	27.7354	24.6027
ENSMUSG00000059834	448.509	399.93	385.667	418.051	286.47	406.5	441.938	501.545	653.657	499.006	499.362	551.73	472.397	519.304	-0.38313	3.0739e-06	3.0585e-05	Sclt1	chr3	-	41626717	41742514	3008	protein_coding	sodium_channel_and_clathrin_linker_1	429	463	453	415	237	426	555	546	593	510	427	576	394	520	7.09449	6.27931	6.06603	6.51219	4.482	6.31648	7.05695	7.44924	9.46807	7.35086
ENSMUSG00000019813	207.004	218.536	211.138	203.485	165.597	199.433	237.293	304.05	302.027	222.106	309.909	252.876	251.785	276.629	-0.38252	5.5045e-06	5.2211e-05	Cep57l1	chr10	-	41718840	41809871	3386	protein_coding	centrosomal_protein_57-like_1	198	253	248	202	137	209	298	331	274	227	265	264	210	277	2.90884	3.04819	2.95019	2.81592	2.30163	2.75298	3.36613	4.01179	3.88641	2.9066
ENSMUSG00000034509	196.549	184.849	143.029	176.286	171.64	176.532	145.72	215.867	261.242	217.214	202.318	262.455	196.632	221.703	-0.38155	1.4036e-05	0.00012193	Mad2l1bp	chr17	-	46147390	46153553	1269	protein_coding	MAD2L1_binding_protein	188	214	168	175	142	185	183	235	237	222	173	274	164	222	7.3695	6.87957	5.33252	6.50928	6.36543	6.5021	5.51558	7.59982	8.96956	7.58468
ENSMUSG00000025417	2892.83	2875.53	2935.49	3162.08	3227.32	3028.71	2997.21	4032.57	3827.15	4092.83	3695.52	3953.11	3993.8	3948.71	-0.38101	1.9448e-29	1.3871e-27	Pip4k2c	chr10	-	127197067	127211622	3374	protein_coding	phosphatidylinositol-5-phosphate_4-kinase_type_II_gamma	2767	3329	3448	3139	2670	3174	3764	4390	3472	4183	3160	4127	3331	3954	40.7949	40.2511	41.163	43.914	45.0161	41.9571	42.6684	53.397	49.4219	53.7512
ENSMUSG00000043987	4645.05	4168.6	4544.57	5201.96	4448.15	4482	5010.22	6428.23	6516.73	5255.21	5709.34	6712.72	5975.71	5984.98	-0.38076	4.1378e-12	9.4637e-11	Cep164	chr9	-	45766946	45828691	5541	protein_coding	centrosomal_protein_164	4443	4826	5338	5164	3680	4697	6292	6998	5912	5371	4882	7008	4984	5993	39.8869	35.531	38.8039	43.9901	37.7799	37.8073	43.4313	51.8302	51.2426	42.0255
ENSMUSG00000022833	340.825	318.735	306.49	312.279	279.218	323.482	309.754	412.443	412.256	395.291	438.55	443.492	384.872	387.48	-0.38025	7.8749e-11	1.5473e-09	Ccdc14	chr16	+	34690616	34725194	4107	protein_coding	coiled-coil_domain_containing_14	326	369	360	310	231	339	389	449	374	404	375	463	321	388	3.94852	3.66531	3.53071	3.56282	3.19955	3.68145	3.62265	4.48661	4.37352	4.26484
ENSMUSG00000055452	18.8186	22.4583	24.6895	26.1911	25.3834	23.8556	23.0922	28.476	39.6824	40.1161	26.8977	26.8202	34.7704	33.9545	-0.38024	0.011577	0.041419	Gm7353	chr7	-	3108535	3111950	3338	protein_coding	predicted_pseudogene_7353	18	26	29	26	21	25	29	31	36	41	23	28	29	34	0.268243	0.317758	0.349942	0.367658	0.357877	0.334039	0.332287	0.381129	0.517965	0.532529
ENSMUSG00000002459	1320.44	1229.16	1188.5	1498.94	1323.57	1385.53	1283.61	1654.36	1798.93	1534.2	1744.85	1844.85	1640.2	1858.51	-0.38001	1.5085e-12	3.6185e-11	Rgs20	chr1	-	4909576	5070285	2125	protein_coding	regulator_of_G-protein_signaling_20	1263	1423	1396	1488	1095	1452	1612	1801	1632	1568	1492	1926	1368	1861	29.5656	27.3184	26.4613	33.0522	29.3127	30.4755	29.014	34.7818	36.8847	31.9914
ENSMUSG00000037325	2845.79	2723.5	2978.91	2863.9	2752.29	3062.11	2809.29	3650.44	3762.11	3877.57	3667.45	3839.12	3777.98	3558.23	-0.3799	4.6151e-31	3.6387e-29	Bbs7	chr3	-	36573142	36613477	2687	protein_coding	Bardet-Biedl_syndrome_7_(human)	2722	3153	3499	2843	2277	3209	3528	3974	3413	3963	3136	4008	3151	3563	50.3921	47.8702	52.4519	49.942	48.2055	53.2654	50.2184	60.6956	61.0033	63.9443
ENSMUSG00000025323	2828.01	2971.4	2369.34	2505.28	2440.44	2641.3	2850.7	3384.05	4113.74	3326.7	3327.13	3425.33	3269.61	3529.27	-0.37939	3.1549e-11	6.5141e-10	Sp4	chr12	-	118234933	118301440	5770	protein_coding	trans-acting_transcription_factor_4	2705	3440	2783	2487	2019	2768	3580	3684	3732	3400	2845	3576	2727	3534	23.3203	24.3216	19.4277	20.3449	19.905	21.3961	23.7306	26.2024	31.0635	25.5475
ENSMUSG00000022197	4107.67	3788.54	3796.22	4324.56	3964.65	4138.47	3965.49	5046.68	5842.13	4823.72	5222.84	5682.06	5065.68	4997.3	-0.37934	3.8875e-17	1.3784e-15	Pdzd2	chr15	-	12359711	12739924	10756	protein_coding	PDZ_domain_containing_2	3929	4386	4459	4293	3280	4337	4980	5494	5300	4930	4466	5932	4225	5004	18.1708	16.6351	16.6983	18.8394	17.347	17.9838	17.7085	20.9621	23.6652	19.872
ENSMUSG00000026609	6946.14	7223.8	6357.96	7562.19	6470.36	7030.73	7715.99	9205.1	10709.8	7806.99	9211.89	10391.9	8374.86	8930.03	-0.37878	8.0176e-10	1.4041e-08	Ush2a	chr1	+	188262023	188965041	15695	protein_coding	Usher_syndrome_2A_(autosomal_recessive_mild)	6644	8363	7468	7507	5353	7368	9690	10021	9716	7979	7877	10849	6985	8942	21.0577	21.7375	19.1658	22.5768	19.4016	20.9378	23.6137	26.2027	29.7311	22.0411
ENSMUSG00000029638	181.913	202.125	282.652	263.926	302.184	199.433	199.867	296.702	295.413	301.36	319.265	369.736	303.341	279.625	-0.37833	0.000131	0.00089831	Glcci1	chr6	+	8509600	8597548	6200	protein_coding	glucocorticoid_induced_transcript_1	174	234	332	262	250	209	251	323	268	308	273	386	253	280	1.39604	1.53969	2.1569	1.99465	2.29377	1.50348	1.5484	2.138	2.076	2.1538
ENSMUSG00000036990	2719.28	2590.48	2444.26	2747.05	2429.56	2610.76	2757.53	3274.74	3819.43	3197.55	3233.58	3528.78	3534.59	3300.57	-0.3782	2.6246e-17	9.4133e-16	Otud4	chr8	+	79639618	79677724	7354	protein_coding	OTU_domain_containing_4	2601	2999	2871	2727	2010	2736	3463	3565	3465	3268	2765	3684	2948	3305	17.5938	16.6365	15.7251	17.5032	15.548	16.5934	18.0107	19.8945	22.6289	19.2666
ENSMUSG00000028100	50.1828	83.7867	70.663	51.3749	68.8979	81.1091	76.4433	90.0209	114.638	71.4263	101.744	97.7023	106.709	75.8982	-0.37789	0.0023906	0.011198	Nudt17	chr3	-	96705892	96708560	1336	protein_coding	nudix_(nucleoside_diphosphate_linked_moiety_X)-type_motif_17	48	97	83	51	57	85	96	98	104	73	87	102	89	76	1.78721	2.96193	2.5024	1.80186	2.427	2.83763	2.74832	3.01035	3.73862	2.36898
ENSMUSG00000025646	762.152	677.204	700.67	818.977	702.275	725.211	719.841	986.556	1086.86	970.615	870.084	938.708	929.208	885.812	-0.37733	2.8585e-12	6.6519e-11	Atrip	chr9	-	109057933	109074124	4248	protein_coding	ATR_interacting_protein	729	784	823	813	581	760	904	1074	986	992	744	980	775	887	8.5366	7.52905	7.80369	9.03364	7.78024	7.97944	8.13928	10.3757	11.1475	10.1245
ENSMUSG00000054752	3807.62	4016.58	3462.49	3740.3	3192.27	3603.15	3781.55	4767.44	5586.4	4387.34	4277.91	4680.13	4773.13	5001.29	-0.37696	1.4666e-11	3.1646e-10	Fsd1l	chr4	+	53631471	53707009	7467	protein_coding	fibronectin_type_III_and_SPRY_domain_containing_1-like	3642	4650	4067	3713	2641	3776	4749	5190	5068	4484	3658	4886	3981	5008	24.2625	25.4048	21.9388	23.4712	20.1198	22.5543	24.3253	28.5245	32.5968	26.0355
ENSMUSG00000028910	491.374	468.169	496.344	550.014	476.242	507.648	521.566	650.355	701.055	567.497	610.462	681.042	707.397	676.094	-0.37691	2.2698e-11	4.7871e-10	Mecr	chr4	+	131843470	131867786	1337	protein_coding	mitochondrial_trans-2-enoyl-CoA_reductase	470	542	583	546	394	532	655	708	636	580	522	711	590	677	17.4867	16.5378	17.5639	19.276	16.7636	17.7469	18.7375	21.732	22.846	18.808
ENSMUSG00000022911	1513.85	1499.52	1505.21	1488.87	1495.21	1524.85	1494.62	1947.39	1897.04	1905.03	1931.96	2101.56	1933.95	1967.36	-0.37685	3.6203e-33	3.1464e-31	Arl13b	chr16	-	62793685	62847040	3528	protein_coding	ADP-ribosylation_factor-like_13B	1448	1736	1768	1478	1237	1598	1877	2120	1721	1947	1652	2194	1613	1970	20.4165	20.0738	20.1854	19.7744	19.9454	20.2019	20.3488	24.6606	23.4281	23.9267
ENSMUSG00000097488	163.094	164.118	138.772	153.117	137.796	138.363	144.127	174.53	250.219	193.732	191.793	184.868	191.836	186.75	-0.37587	1.1553e-05	0.00010255	4732487G21Rik	chr12	-	86290761	86306006	2664	lincRNA	RIKEN_cDNA_4732487G21_gene	156	190	163	152	114	145	181	190	227	198	164	193	160	187	2.91294	2.90957	2.46455	2.69318	2.43429	2.4276	2.59864	2.92696	4.09238	3.22238
ENSMUSG00000056687	283.324	243.586	240.935	261.911	264.713	255.732	318.514	436.326	328.482	320.929	315.756	336.211	326.122	393.472	-0.37564	4.6562e-06	4.4687e-05	Gm11696	chr11	-	109352835	109363654	2765	antisense	predicted_gene_11696	271	282	283	260	219	268	400	475	298	328	270	351	272	394	4.87546	4.16067	4.12264	4.43849	4.50558	4.32298	5.53308	7.0501	5.17613	5.14309
ENSMUSG00000031893	43.91	46.6441	29.7976	43.3161	31.4271	31.4894	48.5733	50.522	59.5236	49.9006	37.423	57.4719	45.5612	80.8915	-0.37563	0.0099845	0.036766	Tsnaxip1	chr8	+	105827744	105844676	2210	protein_coding	translin-associated_factor_X_(Tsnax)_interacting_protein_1	42	54	35	43	26	33	61	55	54	51	32	60	38	81	0.945363	0.996805	0.637911	0.918402	0.669241	0.665986	1.0557	1.02133	1.17351	1.00052
ENSMUSG00000020770	1018.29	891.421	980.768	1116.15	1095.11	1042.01	1115.59	1389.81	1297.39	1255.34	1201.04	1498.1	1396.81	1434.08	-0.37547	5.5735e-11	1.1151e-09	Unk	chr11	+	116030322	116061214	3735	protein_coding	unkempt_homolog_(Drosophila)	974	1032	1152	1108	906	1092	1401	1513	1177	1283	1027	1564	1165	1436	12.9721	11.2719	12.4236	14.0025	13.7987	13.0399	14.3466	16.6244	15.1346	14.893
ENSMUSG00000097375	240.459	247.041	231.57	251.838	197.024	263.366	250.829	352.735	318.561	328.757	283.011	328.548	312.933	283.62	-0.37538	1.1399e-07	1.4599e-06	6720427I07Rik	chr13	-	48535523	48537822	2300	lincRNA	RIKEN_cDNA_6720427I07_gene	230	286	272	250	163	276	315	384	289	336	242	343	261	284	4.97441	5.07279	4.76349	5.13061	4.03145	5.3521	5.23823	6.85173	6.03468	6.3337
ENSMUSG00000097337	69.0014	75.1489	74.9198	77.5661	67.6892	53.4366	71.6656	94.6138	83.7739	74.3616	101.744	105.365	81.5305	113.847	-0.37515	0.00090151	0.0048616	Gm26606	chr4	-	123898633	123904842	2439	lincRNA	predicted_gene_26606	66	87	88	77	56	56	90	103	76	76	87	110	68	114	1.34609	1.45518	1.4533	1.49017	1.3061	1.02405	1.41134	1.7331	1.49653	1.35098
ENSMUSG00000070883	288.551	251.36	273.287	270.978	246.582	271	271.533	394.99	422.176	283.748	320.434	362.073	327.321	349.531	-0.37504	1.0262e-06	1.1149e-05	Ccdc173	chr2	-	69758033	69789575	1844	protein_coding	coiled-coil_domain_containing_173	276	291	321	269	204	284	341	430	383	290	274	378	273	350	7.44543	6.43785	7.01179	6.8857	6.29319	6.86911	7.07287	9.56984	9.97522	6.81841
ENSMUSG00000024666	470.464	485.445	466.546	453.308	535.47	546.771	443.53	650.355	650.35	630.117	632.682	637.938	593.494	629.156	-0.3746	1.9576e-12	4.6362e-11	Tmem138	chr19	-	10570478	10577362	1590	protein_coding	transmembrane_protein_138	450	562	548	450	443	573	557	708	590	644	541	666	495	630	14.0785	14.4194	13.8825	13.3589	15.8492	16.0731	13.3986	18.274	17.8213	17.5604
ENSMUSG00000037957	1136.43	1212.75	1117.84	1104.06	1058.85	1092.59	1166.56	1521.17	1579.58	1373.73	1404.53	1548.87	1435.18	1407.11	-0.37403	2.8637e-18	1.0965e-16	Wdr20	chr12	+	110737949	110795028	2427	protein_coding	WD_repeat_domain_20	1087	1404	1313	1096	876	1145	1465	1656	1433	1404	1201	1617	1197	1409	22.2793	23.5997	21.7911	21.3156	20.5322	21.0416	23.0871	28.0019	28.357	25.0809
ENSMUSG00000027309	2564.55	2494.6	2423.83	2667.47	2373.96	2555.42	2783.01	3746.89	3367.49	3187.77	3089.73	3392.76	3196.47	3252.64	-0.37336	1.1699e-16	3.9604e-15	4930402H24Rik	chr2	-	130706200	130906406	6628	protein_coding	RIKEN_cDNA_4930402H24_gene	2453	2888	2847	2648	1964	2678	3495	4079	3055	3258	2642	3542	2666	3257	18.4101	17.7756	17.3017	18.8578	16.8562	18.0207	20.1682	25.2562	22.1367	21.3115
ENSMUSG00000037594	526.92	543.318	559.344	562.102	587.446	541.046	472.993	695.366	597.44	782.754	707.528	673.379	721.785	762.977	-0.37326	5.5023e-10	9.8577e-09	BC022687	chr12	+	112808975	112816245	1915	protein_coding	cDNA_sequence_BC022687	504	629	657	558	486	567	594	757	542	800	605	703	602	764	13.0919	13.3996	13.8191	13.7538	14.4367	13.2056	11.8637	16.2227	13.593	18.112
ENSMUSG00000000738	2429.69	2227.69	2304.63	2287.69	2409.01	2397.97	2321.96	3125.93	3002.63	3067.42	2889.75	3067.08	2984.26	3086.86	-0.373	4.8947e-36	4.7637e-34	Spg7	chr8	+	123062942	123097760	3385	protein_coding	spastic_paraplegia_7_homolog_(human)	2324	2579	2707	2271	1993	2513	2916	3403	2724	3135	2471	3202	2489	3091	34.1522	31.0815	32.2117	31.6676	33.4927	33.1114	32.9481	41.2573	38.6485	40.1536
ENSMUSG00000097220	153.685	135.614	185.597	209.529	166.806	232.831	244.459	218.622	294.311	198.624	278.333	300.77	243.392	244.672	-0.37268	0.00095656	0.0051099	Gm26599	chr7	-	108950754	108961535	3189	lincRNA	predicted_gene_26599	147	157	218	208	138	244	307	238	267	203	238	314	203	245	2.293	2.00842	2.75351	3.07869	2.46165	3.41255	3.68202	3.06281	4.02107	2.75986
ENSMUSG00000002346	786.198	709.164	878.605	886.469	841.28	767.197	805.043	1131.69	1183.86	1046.93	999.894	1014.38	966.376	1043.6	-0.37254	3.3117e-11	6.8153e-10	Slc25a42	chr8	-	70184340	70212305	3657	protein_coding	solute_carrier_family_25_member_42	752	821	1032	880	696	804	1011	1232	1074	1070	855	1059	806	1045	10.229	9.15856	11.3668	11.3583	10.8264	9.80561	10.5737	13.8256	14.1047	12.6854
ENSMUSG00000022831	675.377	602.919	715.143	670.896	669.64	798.686	691.971	990.23	810.182	818.956	804.593	886.025	1002.35	987.676	-0.37217	1.4754e-08	2.1321e-07	Hcls1	chr16	+	36934983	36963212	2016	protein_coding	hematopoietic_cell_specific_Lyn_substrate_1	646	698	840	666	554	837	869	1078	735	837	688	925	836	989	15.9398	14.1245	16.7831	15.5934	15.6322	18.5173	16.4866	21.9445	17.5098	18.0003
ENSMUSG00000038312	983.793	952.75	989.282	1077.87	1017.76	937.049	1031.98	1467.89	1253.3	1302.31	1239.64	1350.59	1192.98	1270.3	-0.3721	7.9384e-15	2.3546e-13	Edem2	chr2	-	155701677	155729475	2290	protein_coding	ER_degradation_enhancer_mannosidase_alpha-like_2	941	1103	1162	1070	842	982	1296	1598	1137	1331	1060	1410	995	1272	20.4407	19.6494	20.4388	22.0549	20.916	19.1258	21.6457	28.6377	23.8457	25.1993
ENSMUSG00000039349	73.1833	62.1922	70.663	73.5366	97.9076	64.8873	78.0358	89.1024	82.6716	124.262	112.269	88.1236	76.7346	120.838	-0.37148	0.0019987	0.0096505	C130074G19Rik	chr1	-	184871926	184883218	3035	protein_coding	RIKEN_cDNA_C130074G19_gene	70	72	83	73	81	68	98	97	75	127	96	92	64	121	1.14731	0.967793	1.10155	1.13533	1.5182	0.999295	1.23501	1.31163	1.18683	1.81422
ENSMUSG00000025893	309.461	370.562	413.761	354.588	339.655	387.415	335.236	453.779	499.337	455.954	450.245	473.186	495.178	453.392	-0.37099	2.2954e-09	3.7395e-08	Kbtbd3	chr9	+	4309743	4331721	2310	protein_coding	kelch_repeat_and_BTB_(POZ)_domain_containing_3	296	429	486	352	281	406	421	494	453	466	385	494	413	454	6.37414	7.57625	8.4744	7.19262	6.91983	7.83894	6.97063	8.77631	9.41826	8.74621
ENSMUSG00000028453	363.826	366.243	383.964	373.727	378.334	353.063	389.383	543.8	467.37	432.472	435.042	535.447	502.372	479.357	-0.37073	1.0359e-09	1.7873e-08	Fancg	chr4	-	43002343	43010506	2974	protein_coding	Fanconi_anemia_complementation_group_G	348	424	451	371	313	370	489	592	424	442	372	559	419	480	5.82076	5.81613	6.1083	5.8883	5.98694	5.54886	6.28883	8.16917	6.84714	6.44358
ENSMUSG00000038457	53.3193	63.056	53.6357	57.419	38.6795	47.7113	62.1101	79.9165	78.2625	80.2323	67.8291	68.9663	59.9489	70.9049	-0.37	0.0018615	0.0090607	Tmem255b	chr8	+	13435459	13461452	1224	protein_coding	transmembrane_protein_255B	51	73	63	57	32	50	78	87	71	82	58	72	50	71	2.07267	2.43305	2.07321	2.19811	1.4872	1.82193	2.43734	2.91699	2.78587	2.90455
ENSMUSG00000007035	44.9555	57.0095	63.0007	73.5366	64.063	44.8486	78.8321	74.4051	98.1037	69.4694	83.0322	88.1236	80.3315	81.8902	-0.36985	0.0026973	0.01239	Msh5	chr17	-	35028605	35046745	2886	protein_coding	mutS_homolog_5_(E._coli)	43	66	74	73	53	47	99	81	89	71	71	92	67	82	0.741163	0.932946	1.03281	1.19394	1.04467	0.726348	1.31202	1.15182	1.48108	1.06662
ENSMUSG00000086013	617.876	582.188	545.722	655.786	771.173	727.12	688.786	807.433	855.376	911.908	881.778	694.452	856.07	989.673	-0.36972	1.1391e-06	1.2289e-05	Gm15706	chr6	+	145250529	145251849	899	lincRNA	predicted_gene_15706	591	674	641	651	638	762	865	879	776	932	754	725	714	991	32.7016	30.585	28.7199	34.1805	40.3703	37.8041	36.8009	40.126	41.4559	44.9471
ENSMUSG00000030030	227.914	217.673	261.368	251.838	265.922	230.922	285.07	380.293	307.538	318.972	334.468	293.107	326.122	313.58	-0.36899	5.5824e-07	6.3528e-06	1700003E16Rik	chr6	+	83156404	83162975	2050	protein_coding	RIKEN_cDNA_1700003E16_gene	218	252	307	250	220	242	358	414	279	326	286	306	272	314	5.28986	5.01482	6.03211	5.75629	6.10478	5.26508	6.6793	8.28788	6.53634	6.89461
ENSMUSG00000021803	22783	22353.8	23617.6	24029.4	23395.1	25367.1	21106.3	28406.2	30650.2	31515.6	30830.7	29229.3	29904.9	29968.8	-0.3682	3.1023e-23	1.571e-21	Cdhr1	chr14	-	37077850	37098311	4303	protein_coding	cadherin-related_family_member_1	21792	25879	27741	23854	19355	26584	26506	30924	27806	32210	26363	30515	24942	30009	251.923	245.349	259.678	261.666	255.872	275.545	235.6	294.932	310.35	324.538
ENSMUSG00000031756	46.0009	70.83	63.0007	83.6102	62.8543	59.162	48.5733	85.428	90.3877	94.9089	90.049	69.9242	87.5254	64.913	-0.36812	0.0030224	0.013642	Cenpn	chr8	+	116921740	116941503	1768	protein_coding	centromere_protein_N	44	82	74	83	52	62	61	93	82	97	77	73	73	65	1.23798	1.89208	1.68591	2.21591	1.6731	1.56406	1.31962	2.15873	2.22749	2.37868
ENSMUSG00000026655	1454.26	1509.89	1410.71	1472.75	1486.74	1552.52	1360.85	2161.42	1832	1892.31	1775.25	1848.68	1896.78	1857.51	-0.36801	1.0817e-16	3.675e-15	Fam107b	chr2	+	3613758	3782142	3156	protein_coding	family_with_sequence_similarity_107_member_B	1391	1748	1657	1462	1230	1627	1709	2353	1662	1934	1518	1930	1582	1860	21.9246	22.595	21.148	21.8659	22.1702	22.9929	20.7113	30.5972	25.2917	26.5684
ENSMUSG00000024795	87.82	82.0591	103.015	83.6102	76.1503	81.1091	79.6284	113.904	162.036	99.8011	100.574	100.576	104.311	109.853	-0.36775	0.00096045	0.0051277	Kif20b	chr19	+	34922358	34975731	5563	protein_coding	kinesin_family_member_20B	84	95	121	83	63	85	100	124	147	102	86	105	87	110	0.751125	0.696664	0.876114	0.704248	0.644218	0.68148	0.687532	0.914765	1.26909	0.794945
ENSMUSG00000064140	38.6826	24.1859	32.3517	38.2793	22.966	46.757	35.0365	45.0105	46.2961	51.8575	40.9314	55.5562	43.1632	42.9424	-0.36773	0.0094991	0.035302	Trim38	chr13	+	23782572	23791495	1416	protein_coding	tripartite_motif-containing_38	37	28	38	38	19	49	44	49	42	53	35	58	36	43	1.29981	0.806684	1.08095	1.26671	0.763294	1.54339	1.18848	1.42014	1.42453	1.62278
ENSMUSG00000051278	279.142	255.679	179.637	176.286	165.597	206.113	229.33	298.539	286.595	242.654	249.097	299.812	252.984	344.538	-0.36768	0.00038632	0.0023256	Zgrf1	chr3	+	127553489	127618021	7046	protein_coding	zinc_finger_GRF-type_containing_1	267	296	211	175	137	216	288	325	260	248	213	313	211	345	1.885	1.71379	1.20621	1.17234	1.10606	1.36727	1.56333	1.89294	1.77221	1.526
ENSMUSG00000040250	1285.94	1184.24	1209.78	1041.6	1052.81	1026.75	1106.04	1647.02	1577.37	1201.53	1418.56	1589.1	1551.48	1315.24	-0.36736	5.7583e-08	7.7077e-07	Asun	chr6	-	146549632	146577835	3059	protein_coding	asunder_spermatogenesis_regulator	1230	1371	1421	1034	871	1076	1389	1793	1431	1228	1213	1659	1294	1317	20.0017	18.2838	18.7111	15.955	16.1972	15.6883	17.367	24.0546	22.467	17.4046
ENSMUSG00000033233	220.595	212.49	165.164	171.25	203.068	234.739	200.664	255.366	212.742	278.856	292.367	278.739	255.382	268.64	-0.36733	1.3196e-05	0.00011507	Trim45	chr3	+	100922202	100936925	4646	protein_coding	tripartite_motif-containing_45	211	246	194	170	168	246	252	278	193	285	250	291	213	269	2.25915	2.16005	1.68193	1.72714	2.05699	2.36156	2.07455	2.45563	1.99509	2.65957
ENSMUSG00000003810	4114.99	4019.17	3420.77	4222.82	3785.76	3525.86	4682.15	5939.54	6443.98	4175.01	4636.94	5082.43	4462.6	5895.1	-0.36731	0.00021456	0.0013863	Mast2	chr4	-	116306762	116464183	5723	protein_coding	microtubule_associated_serine/threonine_kinase_2	3936	4653	4018	4192	3132	3695	5880	6466	5846	4267	3965	5306	3722	5903	34.2116	33.1679	28.2794	34.5744	31.1315	28.7961	39.2967	46.367	49.0591	32.3255
ENSMUSG00000097515	63.774	102.79	117.488	80.5881	83.4028	115.461	90.7764	162.589	108.024	122.305	101.744	123.565	133.087	124.833	-0.36728	0.0020125	0.0097023	1700040D17Rik	chr3	-	94409395	94412883	962	lincRNA	RIKEN_cDNA_1700040D17_gene	61	119	138	80	69	121	114	177	98	125	87	129	111	125	3.15425	5.04639	5.77815	3.92529	4.08014	5.60988	4.53244	7.55084	4.89255	5.63353
ENSMUSG00000032579	773.652	639.198	640.224	792.785	657.552	633.606	719.044	958.08	887.342	817.978	885.287	913.804	853.672	986.677	-0.36704	8.9972e-10	1.5625e-08	Hemk1	chr9	-	107327692	107338350	1888	protein_coding	HemK_methyltransferase_family_member_1	740	740	752	787	544	664	903	1043	805	836	757	954	712	988	19.4972	15.9896	16.0435	19.6757	16.3907	15.6859	18.2931	22.6715	20.4776	19.1977
ENSMUSG00000029804	10359.6	10435.3	10145.7	10938.8	10076	10808.5	10030	13155.9	13357.5	13495.7	13439.5	14127.6	13088	13339.1	-0.36693	2.0373e-41	2.4882e-39	Herc3	chr6	+	58831465	58920398	4731	protein_coding	hect_domain_and_RLD_3	9909	12081	11917	10859	8336	11327	12596	14322	12118	13793	11492	14749	10916	13357	104.188	104.174	101.461	108.341	100.232	106.784	101.831	124.236	123.016	126.401
ENSMUSG00000074140	347.098	306.642	350.761	344.514	299.766	328.253	331.254	447.349	459.654	416.817	403.466	440.618	422.04	407.454	-0.36666	1.3739e-10	2.6143e-09	Zfp319	chr8	-	95323014	95325263	2250	protein_coding	-	332	355	412	342	248	344	416	487	417	426	345	460	352	408	7.34002	6.43657	7.37563	7.17464	6.27004	6.81898	7.07152	8.88267	8.90098	8.20867
ENSMUSG00000048478	31.3643	29.3685	22.1354	33.2426	26.5922	30.5352	31.0551	40.4176	36.3755	35.2239	40.9314	33.5253	43.1632	49.9331	-0.36647	0.010012	0.036836	Spata33	chr8	+	123212858	123222045	518	protein_coding	spermatogenesis_associated_33	30	34	26	33	22	32	39	44	33	36	35	35	36	50	2.88093	2.67768	2.02175	3.00705	2.41599	2.75527	2.87963	3.48594	3.05963	3.01313
ENSMUSG00000097588	261.369	183.121	219.651	220.61	182.519	227.106	263.57	317.829	310.845	221.128	277.164	288.317	310.535	323.566	-0.36588	7.2799e-05	0.00054002	Gm17388	chr4	+	136355774	136359440	1919	lincRNA	predicted_gene_17388	250	212	258	219	151	238	331	346	282	226	237	301	259	324	6.48047	4.50682	5.41538	5.38674	4.47614	5.53153	6.59713	7.39943	7.05763	5.10598
ENSMUSG00000030822	1709.35	1688.69	1590.34	1754.81	1788.93	1698.52	1778.1	2495.78	2383.15	2161.38	2148.31	2247.15	2192.93	1913.43	-0.36575	1.2665e-13	3.3808e-12	Prr14	chr7	+	127459611	127476759	2402	protein_coding	proline_rich_14	1635	1955	1868	1742	1480	1780	2233	2717	2162	2209	1837	2346	1829	1916	33.86	33.2034	31.3248	34.232	35.0502	33.0514	35.5564	46.4209	43.2282	39.872
ENSMUSG00000089809	176.685	181.394	131.11	189.382	177.684	168.898	199.867	232.401	227.071	206.451	226.877	283.528	202.627	224.699	-0.36572	4.6697e-05	0.00036251	A930011G23Rik	chr5	-	99297244	99729065	3339	protein_coding	RIKEN_cDNA_A930011G23_gene	169	210	154	188	147	177	251	253	206	211	194	296	169	225	2.51775	2.56573	1.85776	2.65765	2.50439	2.36429	2.87514	3.10958	2.96302	2.73976
ENSMUSG00000026457	10930.5	10984.7	11576	11406.2	11387.5	11401.1	10214.7	14494.3	14214	15051.4	14359.9	13886.2	14203.1	14265.9	-0.36482	6.9963e-34	6.3772e-32	Adipor1	chr1	+	134415378	134433351	3446	protein_coding	adiponectin_receptor_1	10455	12717	13597	11323	9421	11948	12828	15779	12895	15383	12279	14497	11846	14285	150.921	150.549	158.932	155.097	155.519	154.641	142.379	187.915	179.718	193.54
ENSMUSG00000054717	821.744	805.043	779.847	735.366	744.581	844.489	724.618	1029.73	902.774	1041.06	962.471	1049.82	975.968	1090.54	-0.36455	3.0604e-13	7.877e-12	Hmgb2	chr8	+	57511843	57515999	2692	protein_coding	high_mobility_group_box_2	786	932	916	730	616	885	910	1121	819	1064	823	1096	814	1092	14.5241	14.1237	13.7058	12.7998	13.0169	14.6626	12.9291	17.0894	14.6114	17.1361
ENSMUSG00000027329	205.959	199.533	212.84	253.853	224.825	253.824	179.96	295.783	289.902	272.007	290.028	263.413	300.943	277.628	-0.36373	1.9283e-06	1.9853e-05	Spef1	chr2	-	131170261	131187282	2600	protein_coding	sperm_flagellar_1	197	231	250	252	186	266	226	322	263	278	248	275	251	278	3.76907	3.62449	3.87303	4.57492	4.0695	4.56301	3.32458	5.08253	4.8581	4.63572
ENSMUSG00000100967	190.277	199.533	139.623	180.316	130.543	153.63	195.09	248.935	262.345	190.796	178.928	241.382	199.03	247.668	-0.36371	0.00041894	0.0024978	RP23-180L12.5	chr15	-	84910438	84920038	8038	protein_coding	predicted_gene_29666	182	231	164	179	108	161	245	271	238	195	153	252	166	248	1.12633	1.17239	0.821827	1.05114	0.764323	0.893349	1.16579	1.38362	1.42205	1.0518
ENSMUSG00000059851	1589.12	1405.37	1701.02	1851.51	1611.24	1487.64	1727.14	2303.8	2319.21	1898.18	2038.38	2145.62	2100.61	1931.41	-0.36368	8.6308e-10	1.5016e-08	Suv420h2	chr7	+	4740115	4747514	2774	protein_coding	suppressor_of_variegation_4-20_homolog_2_(Drosophila)	1520	1627	1998	1838	1333	1559	2169	2508	2104	1940	1743	2240	1752	1934	27.2571	23.9271	29.0117	31.2749	27.3354	25.0659	29.9058	37.1038	36.427	30.3208
ENSMUSG00000027601	2829.06	2760.64	2724.36	2704.74	2690.65	2840.73	2681.88	3627.48	3821.63	3632.96	3407.83	3397.55	3379.92	3522.28	-0.36353	1.5129e-28	1.047e-26	Mtfr1	chr3	+	19187327	19220817	2953	protein_coding	mitochondrial_fission_regulator_1	2706	3196	3200	2685	2226	2977	3368	3949	3467	3713	2914	3547	2819	3527	45.5833	44.1522	43.6487	42.9178	42.8808	44.9634	43.6225	54.8808	56.3865	54.5139
ENSMUSG00000042396	1542.08	1497.8	1350.26	1441.52	1618.5	1473.32	1319.44	2043.84	1874.99	1983.3	1677.02	1832.4	1885.99	1920.43	-0.36308	3.6846e-13	9.393e-12	Rbm7	chr9	-	48488709	48495330	1798	protein_coding	RNA_binding_motif_protein_7	1475	1734	1586	1431	1339	1544	1657	2225	1701	2027	1434	1913	1573	1923	40.8079	39.3431	35.5302	37.567	42.3635	38.3002	35.248	50.7852	45.4359	48.8776
ENSMUSG00000041609	6954.51	7077.82	7783.99	8383.18	7789.09	7806.52	6501.66	9615.71	9177.65	10059.4	10011.8	9785.55	9784.86	9087.82	-0.36227	5.6044e-14	1.5515e-12	Ccdc64	chr5	-	115648175	115731621	3026	protein_coding	coiled-coil_domain_containing_64	6652	8194	9143	8322	6444	8181	8165	10468	8326	10281	8561	10216	8161	9100	109.352	110.468	121.704	129.812	121.14	120.582	103.202	141.968	132.145	147.303
ENSMUSG00000032131	3194.97	3194.26	3448.01	3595.24	3485.99	3373.19	3502.06	4572.7	4361.76	4327.65	4353.93	4669.59	4377.47	3996.64	-0.36192	2.3893e-21	1.0916e-19	Abcg4	chr9	-	44273188	44288615	3997	protein_coding	ATP-binding_cassette_sub-family_G_(WHITE)_member_4	3056	3698	4050	3569	2884	3535	4398	4978	3957	4423	3723	4875	3651	4002	38.033	37.7435	40.8136	42.1472	41.0452	39.4456	42.0846	51.1114	47.5463	47.9765
ENSMUSG00000040195	322.007	286.775	303.936	318.323	285.262	335.887	379.827	389.478	447.529	407.032	438.55	406.135	424.438	390.476	-0.36154	4.8785e-08	6.6201e-07	Tmem194	chr10	+	127666901	127701049	6002	protein_coding	transmembrane_protein_194	308	332	357	316	236	352	477	424	406	416	375	424	354	391	2.55268	2.25658	2.39583	2.48512	2.23675	2.61571	3.03966	2.89912	3.24874	3.00499
ENSMUSG00000020895	347.098	308.37	474.208	416.036	433.936	431.31	362.309	490.522	445.325	547.928	512.227	541.194	517.958	551.261	-0.36153	5.4558e-06	5.1829e-05	Tmem107	chr11	+	69070806	69073293	1263	protein_coding	transmembrane_protein_107	332	357	557	413	359	452	455	534	404	560	438	565	432	552	13.076	11.5312	17.7638	15.4349	16.1693	15.9617	13.7788	17.3514	15.3625	19.2234
ENSMUSG00000027634	11288	11516.8	10595.2	10589.3	11057.5	11574.8	11045.3	14458.5	14386	14356.7	14266.3	14130.4	13729.5	14563.5	-0.36121	3.2066e-42	4.0214e-40	Ndrg3	chr2	-	156927345	156992056	4023	protein_coding	N-myc_downstream_regulated_gene_3	10797	13333	12445	10512	9148	12130	13871	15740	13051	14673	12199	14752	11451	14583	133.504	135.203	124.603	123.337	129.353	134.479	131.874	160.565	155.804	158.13
ENSMUSG00000085741	71.0924	77.7402	97.9065	72.5293	76.1503	84.926	83.6098	104.718	90.3877	100.78	113.438	108.239	103.112	123.834	-0.36113	0.00041611	0.0024842	5430405H02Rik	chr2	-	156844351	156862963	2001	processed_transcript	RIKEN_cDNA_5430405H02_gene	68	90	115	72	63	89	105	114	82	103	97	113	86	124	1.69045	1.83487	2.31492	1.69841	1.791	1.98375	2.00699	2.33806	1.96812	2.2317
ENSMUSG00000090936	49.1374	31.9599	40.014	43.3161	42.3057	52.4824	50.9622	64.3007	45.1938	59.685	63.1512	61.3034	53.954	66.9103	-0.36112	0.0050078	0.020813	Gm17705	chr17	+	35165119	35167186	1555	lincRNA	predicted_gene_17705	47	37	47	43	35	55	64	70	41	61	54	64	45	67	1.50352	0.970689	1.21745	1.30525	1.28038	1.57752	1.57417	1.84742	1.2663	1.70077
ENSMUSG00000097174	51.2283	45.7804	45.9735	53.3896	51.9756	43.8944	42.203	41.3361	72.751	49.9006	80.6932	68.9663	59.9489	76.8969	-0.36101	0.0067313	0.026519	Gm4890	chr8	+	79295123	79307685	2508	lincRNA	predicted_gene_4890	49	53	54	53	43	46	53	45	66	51	69	72	50	77	0.971875	0.862099	0.867263	0.997482	0.975309	0.818038	0.808259	0.736346	1.26387	0.881634
ENSMUSG00000036110	53.3193	48.3717	55.3385	47.3455	61.6455	64.8873	53.351	57.8706	92.5922	47.9437	74.8459	85.25	80.3315	76.8969	-0.36048	0.0051357	0.021264	Slc17a2	chr13	+	23806993	23825180	4629	protein_coding	solute_carrier_family_17_(sodium_phosphate)_member_2	51	56	65	47	51	68	67	63	84	49	64	89	67	77	0.548056	0.493526	0.565602	0.479256	0.626736	0.655187	0.553592	0.558535	0.871518	0.458939
ENSMUSG00000038151	332.461	397.339	343.099	410.999	372.291	381.69	497.677	604.426	578.701	387.463	513.396	524.91	469.999	496.335	-0.35975	5.9339e-05	0.00044946	Prdm1	chr10	-	44437177	44528501	5281	protein_coding	PR_domain_containing_1_with_ZNF_domain	318	460	403	408	308	400	625	658	525	396	439	548	392	497	2.99539	3.55345	3.07378	3.6467	3.31769	3.37821	4.52654	5.11336	4.7745	3.25106
ENSMUSG00000048351	540.511	538.999	518.479	492.595	520.965	597.345	520.77	668.727	753.965	668.276	680.63	702.115	682.218	656.12	-0.35971	7.0168e-13	1.7343e-11	Coa7	chr4	+	108328140	108341544	3714	protein_coding	cytochrome_c_oxidase_assembly_factor_7	517	624	609	489	431	626	654	728	684	683	582	733	569	657	6.92453	6.85412	6.6048	6.21475	6.60141	7.51754	6.735	8.04427	8.84502	7.97305
ENSMUSG00000024424	1288.03	1204.97	1231.92	1301.5	1327.19	1146.02	1188.85	1594.66	1534.39	1629.11	1602.17	1632.2	1537.09	1621.83	-0.35873	5.9475e-21	2.6587e-19	Ttc39c	chr18	+	12599926	12737050	3243	protein_coding	tetratricopeptide_repeat_domain_39C	1232	1395	1447	1292	1098	1201	1493	1736	1392	1665	1370	1704	1282	1624	18.8976	17.5483	17.9724	18.805	19.26	16.5173	17.6082	21.9685	20.6147	22.2594
ENSMUSG00000021396	1542.08	1547.89	1516.27	1709.48	1816.73	1622.18	1554.35	2269.81	2007.27	2170.19	1965.87	2000.98	2005.89	2118.16	-0.35867	8.5034e-15	2.5142e-13	Nxnl2	chr13	+	51171025	51175187	1163	protein_coding	nucleoredoxin-like_2	1475	1792	1781	1697	1503	1700	1952	2471	1821	2218	1681	2089	1673	2121	63.0891	62.859	61.6835	68.8745	73.5158	65.1947	64.1951	87.1947	75.1995	82.6852
ENSMUSG00000047888	8494.49	8619.67	8671.11	9259.57	7945.02	8900.06	9904.18	10455.3	12356.7	9986.96	11229.2	12997.3	11531.8	11141.1	-0.35827	7.3618e-11	1.4526e-09	Tnrc6b	chr15	+	80711319	80941086	17327	protein_coding	trinucleotide_repeat_containing_6b	8125	9979	10185	9192	6573	9327	12438	11382	11210	10207	9602	13569	9618	11156	23.3261	23.4948	23.6768	25.0405	21.5795	24.0083	27.4555	26.9583	31.0718	25.54
ENSMUSG00000100164	142.185	118.338	119.191	109.801	113.621	138.363	133.776	169.019	120.149	167.314	147.353	171.458	199.03	171.77	-0.35824	0.00021618	0.0013949	RP24-467O4.1	chr6	-	86848399	86849440	1042	lincRNA	RIKEN_cDNA_2610306M01_gene	136	137	140	109	94	145	168	184	109	171	126	179	166	172	6.49251	5.36367	5.41184	4.93759	5.1317	6.20646	6.16657	7.24681	5.02393	7.11499
ENSMUSG00000028101	2651.33	2485.1	2596.65	2698.69	2747.46	2675.65	2956.6	3801.09	3669.52	3274.85	3301.41	3420.54	3529.79	3208.7	-0.35823	9.8798e-16	3.1028e-14	Pias3	chr3	+	96696384	96706070	2931	protein_coding	protein_inhibitor_of_activated_STAT_3	2536	2877	3050	2679	2273	2804	3713	4138	3329	3347	2823	3571	2944	3213	43.0403	40.0436	41.9149	43.1433	44.1149	42.6683	48.4519	57.9391	54.5485	49.5092
ENSMUSG00000101904	59.5921	42.3252	36.6085	45.3308	22.966	28.6268	54.1473	59.7078	55.1144	55.7712	50.2871	62.2613	52.755	58.921	-0.35794	0.011938	0.04245	PFKFB2	chr1	-	130670209	130715799	1909	protein_coding	predicted_gene_29427	57	49	43	45	19	30	68	65	50	57	43	65	44	59	1.48529	1.04713	0.907292	1.11266	0.566173	0.700904	1.3624	1.39735	1.25791	1.29454
ENSMUSG00000087390	162.049	178.803	136.218	149.088	129.335	179.394	166.423	219.541	211.639	201.559	182.437	192.531	212.219	215.711	-0.35779	1.6652e-05	0.00014306	Gm7598	chrX	+	38476461	38482486	3123	lincRNA	predicted_gene_7598	155	207	160	148	107	188	209	239	192	206	156	201	177	216	2.46889	2.704	2.06363	2.2369	1.94901	2.68491	2.55963	3.14067	2.95266	2.85983
ENSMUSG00000002835	133.821	148.57	148.988	123.904	145.048	139.317	136.961	192.902	212.742	148.723	150.861	200.194	173.852	192.742	-0.35776	5.8189e-05	0.000442	Chaf1a	chr17	+	56040416	56068026	3308	protein_coding	chromatin_assembly_factor_1_subunit_A_(p150)	128	172	175	123	120	146	172	210	193	152	129	209	145	193	1.9248	2.12115	2.13087	1.75508	2.06356	1.96848	1.98868	2.60526	2.80205	1.99216
ENSMUSG00000057286	1146.89	1063.31	1141.68	1224.94	1114.45	1125.03	1256.54	1638.75	1593.91	1422.66	1417.39	1521.09	1425.58	1371.16	-0.35746	3.0282e-13	7.8047e-12	St6galnac2	chr11	-	116675303	116694868	3643	protein_coding	ST6_(alpha-N-acetyl-neuraminyl-23-beta-galactosyl-13)-N-acetylgalactosaminide_alpha-26-sialyltransferase_2	1097	1231	1341	1216	922	1179	1578	1784	1446	1454	1212	1588	1189	1373	14.9792	13.785	14.827	15.7555	14.397	14.4344	16.5672	20.0971	19.0631	17.3042
ENSMUSG00000022555	563.512	553.683	665.764	640.675	656.343	624.063	653.749	767.015	895.058	711.328	776.526	892.731	845.279	738.011	-0.35693	7.5703e-09	1.1417e-07	Dgat1	chr15	-	76502015	76511951	1888	protein_coding	diacylglycerol_O-acyltransferase_1	539	641	782	636	543	654	821	835	812	727	664	932	705	739	14.2013	13.8505	16.6836	15.9005	16.3606	15.4497	16.632	18.1502	20.6556	16.6947
ENSMUSG00000045275	128.594	164.118	150.691	172.257	122.082	129.775	144.127	173.612	199.514	169.271	168.403	171.458	201.428	242.675	-0.35654	0.00022862	0.001457	Lca5l	chr16	-	96158407	96192257	3162	protein_coding	Leber_congenital_amaurosis_5-like	123	190	177	171	101	136	181	189	181	173	144	179	168	243	1.93502	2.45132	2.25474	2.55265	1.81702	1.91832	2.18937	2.453	2.74917	2.37208
ENSMUSG00000000530	174.594	189.168	178.786	197.441	204.276	172.715	224.552	253.528	288.8	247.546	206.996	213.604	267.372	266.643	-0.35646	2.0057e-05	0.00016897	Acvrl1	chr15	+	101128522	101145336	3640	protein_coding	activin_A_receptor_type_II-like_1	167	219	210	196	169	181	282	276	262	253	177	223	223	267	2.28222	2.45444	2.32382	2.54162	2.64111	2.21779	2.96312	3.11175	3.45688	3.01346
ENSMUSG00000051413	1912.18	2061.84	1661.01	1928.07	1970.24	1892.23	2042.47	2575.7	2595.89	2298.36	2320.22	2626.47	2480.69	2414.76	-0.35627	5.5949e-14	1.5511e-12	Plagl2	chr2	-	153227759	153241426	5571	protein_coding	pleiomorphic_adenoma_gene-like_2	1829	2387	1951	1914	1630	1983	2565	2804	2355	2349	1984	2742	2069	2418	16.3314	17.4795	14.1062	16.2168	16.6439	15.8757	17.6099	20.6558	20.3022	18.2808
ENSMUSG00000029790	388.917	389.565	401.842	441.22	391.63	450.394	379.827	563.09	491.621	526.402	532.108	469.354	492.78	587.213	-0.3562	5.7766e-09	8.8695e-08	Cep41	chr6	-	30653457	30693749	3522	protein_coding	centrosomal_protein_41	372	451	472	438	324	472	477	613	446	538	455	490	411	588	5.25406	5.22391	5.39805	5.87004	5.23308	5.97718	5.18002	7.14279	6.08177	6.62275
ENSMUSG00000012126	1041.29	923.381	764.522	944.896	745.79	740.479	973.059	1404.51	1161.81	854.18	1073.57	1210.74	1041.91	1236.34	-0.35584	6.8464e-05	0.00051111	Ubxn11	chr4	+	134102570	134127593	2207	protein_coding	UBX_domain_protein_11	996	1069	898	938	617	776	1222	1529	1054	873	918	1264	869	1238	22.4491	19.7599	16.3892	20.0612	15.9032	15.682	21.1773	28.4317	22.9363	17.1497
ENSMUSG00000022999	1502.35	1288.76	1351.96	1514.05	1274.01	1292.98	1473.92	2095.28	1931.21	1519.52	1597.49	1969.37	1707.34	1695.73	-0.35557	9.2418e-08	1.2001e-06	Lmbr1l	chr15	-	98903921	98918231	2548	protein_coding	limb_region_1_like	1437	1492	1588	1503	1054	1355	1851	2281	1752	1553	1366	2056	1424	1698	28.0543	23.8879	25.1036	27.843	23.5311	23.7183	27.7849	36.7386	33.0232	26.4252
ENSMUSG00000020520	1950.86	1876.13	2308.04	2262.51	2143.09	2117.43	2105.37	2449.86	2566.13	2890.32	2875.72	2570.91	2899.13	2739.33	-0.35553	4.4238e-12	1.0044e-10	Galnt10	chr11	+	57645442	57787514	4715	protein_coding	UDP-N-acetyl-alpha-D-galactosamine:polypeptide_N-acetylgalactosaminyltransferase_10	1866	2172	2711	2246	1773	2219	2644	2667	2328	2954	2459	2684	2418	2743	19.6866	18.7926	23.1597	22.4846	21.3909	20.9903	21.4478	23.2134	23.713	27.1628
ENSMUSG00000029283	554.102	500.129	536.357	518.786	425.475	447.532	508.825	777.119	756.17	588.044	567.192	624.528	604.285	603.191	-0.35544	2.666e-06	2.6826e-05	Cdc7	chr5	+	106964322	106984432	3679	protein_coding	cell_division_cycle_7_(S._cerevisiae)	530	579	630	515	352	469	639	846	686	601	485	652	504	604	7.16618	6.42033	6.89756	6.60745	5.4427	5.68573	6.64314	9.43708	8.95527	7.08256
ENSMUSG00000062074	158.912	138.205	147.285	154.125	125.709	166.035	179.164	188.309	235.89	160.465	185.945	217.435	214.617	195.738	-0.35528	9.5137e-05	0.00068453	Wisp3	chr10	-	39150971	39163794	1418	protein_coding	WNT1_inducible_signaling_pathway_protein_3	152	160	173	153	104	174	225	205	214	164	159	227	179	196	5.33223	4.60312	4.91422	5.09298	4.17214	5.47289	6.06888	5.933	7.24806	5.01434
ENSMUSG00000054945	64.8195	78.604	92.7984	73.5366	77.3591	85.8803	90.7764	122.171	106.922	90.9952	83.0322	113.028	98.3162	127.829	-0.35519	0.001249	0.0064226	Gm9958	chr5	+	90367204	90368487	1284	protein_coding	predicted_gene_9958	62	91	109	73	64	90	114	133	97	93	71	118	82	128	2.40197	2.89125	3.41937	2.68358	2.83541	3.12623	3.3958	4.25093	3.6282	3.14025
ENSMUSG00000042564	610.558	553.683	662.359	678.955	588.654	629.789	630.657	857.036	914.899	703.5	783.543	819.933	757.754	770.966	-0.35462	2.112e-09	3.4591e-08	Fam227a	chr15	-	79609576	79658956	5187	protein_coding	family_with_sequence_similarity_227_member_A	584	641	778	674	487	660	792	933	830	719	670	856	632	772	5.60065	5.04139	6.04154	6.13339	5.3409	5.67507	5.83997	7.3818	7.68504	6.00978
ENSMUSG00000061353	794.562	707.436	750.9	557.065	743.372	584.94	634.638	989.312	967.809	953.003	844.355	677.211	799.718	956.717	-0.35414	2.6598e-05	0.00021818	Cxcl12	chr6	+	117168535	117181367	5627	protein_coding	chemokine_(C-X-C_motif)_ligand_12	760	819	882	553	615	613	797	1077	878	974	722	707	667	958	6.71859	5.93767	6.31359	4.63879	6.21727	4.85878	5.41731	7.85481	7.4938	7.5046
ENSMUSG00000024063	5308.93	5225.01	4645.88	5146.56	4605.28	4997.28	5392.43	6941.72	7605.79	6017.42	6096.43	6216.55	5741.9	6800.88	-0.35386	3.1861e-10	5.8772e-09	Lbh	chr17	+	72918305	72941942	3064	protein_coding	limb-bud_and_heart	5078	6049	5457	5109	3810	5237	6772	7557	6900	6150	5213	6490	4789	6810	82.4415	80.5385	71.7381	78.7053	70.7355	76.232	84.5338	101.218	108.155	87.0226
ENSMUSG00000029313	5473.07	5579.16	5931.43	6086.42	5934.89	5628.97	6028.67	7530.53	7752.39	6844.21	7576.98	7958.9	7234.63	7199.35	-0.35373	1.3631e-21	6.3202e-20	Aff1	chr5	+	103692374	103855322	8323	protein_coding	AF4/FMR2_family_member_1	5235	6459	6967	6042	4910	5899	7571	8198	7033	6995	6479	8309	6034	7209	31.2881	31.6588	33.7171	34.2655	33.5585	31.6113	34.7917	40.4227	40.5831	36.4379
ENSMUSG00000037400	5182.42	5310.52	4472.2	4807.08	4440.89	4807.39	5337.49	6895.79	7253.06	5696.49	5690.63	6247.2	5871.39	6540.23	-0.35354	1.3341e-09	2.254e-08	Atp11b	chr3	+	35754134	35856274	4866	protein_coding	ATPase_class_VI_type_11B	4957	6148	5253	4772	3674	5038	6703	7507	6580	5822	4866	6522	4897	6549	50.6744	51.5431	43.483	46.2898	42.9505	46.1774	52.6865	63.3128	64.9439	51.8735
ENSMUSG00000086328	92.0019	79.4678	62.1494	64.4705	74.9416	76.338	97.1466	132.276	114.638	92.952	91.2184	95.7865	95.9182	96.8701	-0.35313	0.00212	0.01012	2700033N17Rik	chr2	-	116066218	116067444	721	lincRNA	RIKEN_cDNA_2700033N17_gene	88	92	73	64	62	80	122	144	104	95	78	100	80	97	6.0714	5.20549	4.07823	4.18988	4.89168	4.94878	6.47182	8.19642	6.9276	5.7126
ENSMUSG00000050786	4076.31	4341.36	4095.05	4298.37	4559.35	4265.39	3598.41	5634.58	5424.36	5491.02	5328.09	5001.02	5363.03	5220	-0.35312	8.7843e-16	2.7774e-14	Ccdc126	chr6	+	49319274	49341582	2372	protein_coding	coiled-coil_domain_containing_126	3899	5026	4810	4267	3772	4470	4519	6134	4921	5612	4556	5221	4473	5227	81.7674	86.4404	81.6798	84.9111	90.4604	84.0497	72.8668	106.127	99.6376	102.577
ENSMUSG00000041046	326.188	253.088	305.639	353.58	319.106	317.757	289.051	412.443	392.415	435.407	359.026	396.556	347.704	436.415	-0.35192	1.1213e-06	1.2118e-05	Ramp3	chr11	+	6658521	6677475	1333	protein_coding	receptor_(calcitonin)_activity_modifying_protein_3	312	293	359	351	264	333	363	449	356	445	307	414	290	437	11.643	8.96698	10.848	12.4289	11.2661	11.1419	10.4155	13.8233	12.8264	14.4736
ENSMUSG00000097944	201.777	221.128	243.489	179.309	212.737	187.028	212.608	306.806	256.833	203.516	273.655	268.202	279.362	304.592	-0.35189	5.0277e-05	0.00038742	A130014A01Rik	chr8	+	120101582	120103904	2323	lincRNA	RIKEN_cDNA_A130014A01_gene	193	256	286	178	176	196	267	334	233	208	234	280	233	305	4.13285	4.49572	4.95908	3.61682	4.30988	3.76314	4.39606	5.90057	4.81716	3.88204
ENSMUSG00000032121	486.146	460.395	534.655	451.293	460.528	522.915	457.863	635.658	551.144	633.052	612.801	635.065	622.269	637.146	-0.35105	7.3534e-11	1.4525e-09	Tmem218	chr9	+	37208333	37223210	1019	protein_coding	transmembrane_protein_218	465	533	628	448	381	548	575	692	500	647	524	663	519	638	22.6997	21.3384	24.8239	20.752	21.2692	23.9856	21.5822	27.8695	23.5657	27.5281
ENSMUSG00000015980	315.734	312.689	292.868	265.941	303.393	277.68	322.495	429.896	405.642	349.304	302.892	394.641	412.448	399.464	-0.35101	1.5256e-06	1.6042e-05	Lrrc27	chr7	+	139212988	139242979	2113	protein_coding	leucine_rich_repeat_containing_27	302	362	344	264	251	291	405	468	368	357	259	412	344	400	7.10967	6.98905	6.55758	5.89741	6.75734	6.14238	7.3309	9.08957	8.36436	7.32512
ENSMUSG00000034075	4701.51	4794.85	4259.36	4749.66	4367.16	4519.21	4606.5	6089.27	7051.34	5536.03	5509.36	5534.55	5394.2	5908.08	-0.35092	1.598e-11	3.4387e-10	Zdhhc5	chr2	-	84687970	84715180	4706	protein_coding	zinc_finger_DHHC_domain_containing_5	4497	5551	5003	4715	3613	4736	5785	6629	6397	5658	4711	5778	4499	5916	47.5349	48.1203	42.8216	47.2919	43.6734	44.8852	47.0168	57.8087	65.2843	52.1263
ENSMUSG00000042073	821.744	685.842	786.658	850.205	838.863	763.38	918.912	1150.98	1079.14	811.129	1015.1	1161.89	955.585	1123.49	-0.35048	1.6119e-06	1.6836e-05	Abhd14b	chr9	+	106447788	106452922	1479	protein_coding	abhydrolase_domain_containing_14b	786	794	924	844	694	800	1154	1253	979	829	868	1213	797	1125	26.436	21.9009	25.1645	26.9359	26.6927	24.1249	29.8428	34.768	31.7906	24.3014
ENSMUSG00000030643	494.51	478.534	455.478	482.521	450.858	430.356	505.64	571.357	673.498	599.785	659.579	602.497	503.571	625.162	-0.34969	9.3477e-09	1.3874e-07	Rab30	chr7	+	92741603	92837117	2038	protein_coding	RAB30_member_RAS_oncogene_family	473	554	535	479	373	451	635	622	611	613	564	629	420	626	11.5451	11.0896	10.5739	11.094	10.4113	9.86997	11.9171	12.5252	14.3986	13.0407
ENSMUSG00000057914	4099.31	3956.98	3974.15	4297.36	3860.7	4152.79	3859.59	4856.54	5516.95	5095.73	5322.25	5215.58	5005.73	5002.29	-0.34949	8.039e-24	4.2314e-22	Cacnb2	chr2	+	14604306	14987908	3945	protein_coding	calcium_channel_voltage-dependent_beta_2_subunit	3921	4581	4668	4266	3194	4352	4847	5287	5005	5208	4551	5445	4175	5009	49.4415	47.372	47.6616	51.0423	46.0563	49.2023	46.9924	54.9996	60.9315	57.2361
ENSMUSG00000051736	310.506	310.097	300.53	294.147	270.757	325.391	261.181	409.687	370.369	334.627	376.568	351.537	444.821	381.489	-0.34927	5.0094e-07	5.7533e-06	Fam229b	chr10	-	39118804	39133914	2884	protein_coding	family_with_sequence_similarity_229_member_B	297	359	353	292	224	341	328	446	336	342	322	367	371	382	5.12275	5.07818	4.93019	4.77908	4.41829	5.27354	4.34991	6.34653	5.59537	5.14134
ENSMUSG00000040488	445.373	308.37	341.396	353.58	419.431	259.549	351.161	503.382	442.018	489.221	506.379	435.829	363.29	466.375	-0.34887	0.00017282	0.0011484	Ltbp4	chr7	-	27305136	27337692	5386	protein_coding	latent_transforming_growth_factor_beta_binding_protein_4	426	357	401	351	347	272	441	548	401	500	433	455	303	467	3.93446	2.70403	2.9989	3.07608	3.66492	2.2524	3.13166	4.17553	3.57571	4.02485
ENSMUSG00000027800	88.8655	86.378	119.191	118.867	96.6988	83.0176	108.295	151.566	154.32	123.284	134.489	103.449	125.893	124.833	-0.34854	0.001048	0.0055224	Tm4sf1	chr3	-	57285611	57301919	2855	protein_coding	transmembrane_4_superfamily_member_1	85	100	140	118	80	87	136	165	140	126	115	108	105	125	1.481	1.4289	1.97518	1.95089	1.59399	1.35912	1.82194	2.37178	2.35508	1.91342
ENSMUSG00000041488	14269.7	14605.7	14123.2	14398.1	13813.4	14557.7	13050.3	18473.6	19859.9	18211.8	17862.4	17182.2	16711.4	17841.1	-0.34853	8.7666e-21	3.8818e-19	Stx3	chr19	-	11775119	11819403	3269	protein_coding	syntaxin_3	13649	16909	16589	14293	11428	15256	16389	20111	18017	18613	15274	17938	13938	17865	207.696	211.014	204.404	206.379	198.864	208.146	191.752	252.473	264.699	246.858
ENSMUSG00000029510	198.64	164.118	160.056	168.228	171.64	174.623	195.886	233.32	234.787	206.451	229.216	255.75	230.204	199.732	-0.34848	7.2699e-06	6.7417e-05	Gpc2	chr5	-	138264952	138280005	6411	protein_coding	glypican_2_(cerebroglycan)	190	190	188	167	142	183	246	254	213	211	196	267	192	200	1.47424	1.20903	1.18118	1.22955	1.25998	1.27312	1.46761	1.62594	1.59565	1.42693
ENSMUSG00000025245	1462.62	1414.87	1352.81	1293.44	1260.71	1352.14	1270.87	1782.97	2008.37	1591.93	1561.24	1657.11	1700.15	1738.67	-0.34824	3.6116e-11	7.3998e-10	Lztfl1	chr9	-	123694416	123717625	6541	protein_coding	leucine_zipper_transcription_factor-like_1	1399	1638	1589	1284	1043	1417	1596	1941	1822	1627	1335	1730	1418	1741	10.6394	10.2159	9.78508	9.26568	9.07071	9.66204	9.33235	12.1781	13.3779	10.7842
ENSMUSG00000082922	163.094	127.84	143.88	155.132	129.335	140.271	144.127	205.762	209.435	166.335	169.573	188.699	178.648	175.764	-0.34805	2.8764e-05	0.0002342	Gm6939	chr7	-	126687459	126690034	864	pseudogene	predicted_gene_6939	156	148	169	154	107	147	181	224	190	170	145	197	149	176	8.98158	6.98806	7.87875	8.41325	7.04484	7.58834	8.01248	10.6397	10.5615	8.53063
ENSMUSG00000085890	265.551	199.533	192.408	219.603	184.937	167.944	272.329	340.794	345.016	190.796	236.232	310.348	280.561	267.641	-0.34736	0.0025007	0.011641	Tnfsf13os	chr11	+	69682138	69691141	816	antisense	tumor_necrosis_factor_(ligand)_superfamily_member_13_opposite_strand	254	231	226	218	153	176	342	371	313	195	202	324	234	268	15.4841	11.5486	11.1559	12.6102	10.666	9.6198	16.0302	18.6587	18.4221	10.3607
ENSMUSG00000052698	4234.18	4625.54	4136.76	4976.32	4726.16	4664.25	5064.37	5359.92	6278.63	5748.35	5922.18	6066.16	5833.03	6215.67	-0.34705	2.1887e-13	5.7223e-12	Tln2	chr9	-	67217087	67559703	12132	protein_coding	talin_2	4050	5355	4859	4940	3910	4888	6360	5835	5696	5875	5064	6333	4865	6224	16.606	18.0068	16.1324	19.2199	18.3335	17.9698	20.0506	19.7381	22.5487	20.9953
ENSMUSG00000063810	1014.11	963.115	978.214	1092.98	944.023	1041.06	1163.37	1265.8	1467.15	1311.11	1251.33	1386.99	1287.7	1238.34	-0.34696	2.9962e-11	6.2139e-10	Alms1	chr6	+	85587531	85702753	9986	protein_coding	Alstrom_syndrome_1	970	1115	1149	1085	781	1091	1461	1378	1331	1340	1070	1448	1074	1240	4.83194	4.55504	4.63461	5.12855	4.44898	4.87278	5.59578	5.66311	6.40134	5.8178
ENSMUSG00000030235	198.64	174.484	161.759	171.25	270.757	147.905	203.052	232.401	246.913	294.511	245.588	210.73	211.02	281.622	-0.34643	0.0010214	0.0054008	Slco1c1	chr6	+	141524386	141570177	3178	protein_coding	solute_carrier_organic_anion_transporter_family_member_1c1	190	202	190	170	224	155	255	253	224	301	210	220	176	282	2.974	2.59302	2.40815	2.52494	4.00955	2.17531	3.06894	3.26711	3.38516	4.10637
ENSMUSG00000097010	86.7745	94.1521	80.0279	70.5146	93.0726	92.5598	83.6098	146.054	136.684	108.607	91.2184	97.7023	71.9387	135.818	-0.34544	0.0050493	0.020953	Gm26709	chr12	+	72945807	72965866	599	sense_overlapping	predicted_gene_26709	83	109	94	70	77	97	105	159	124	111	78	102	60	136	6.89276	7.4235	6.321	5.51605	7.31249	7.22251	6.70447	10.8935	9.94213	8.03419
ENSMUSG00000099478	498.692	383.519	370.342	410.999	357.786	385.507	473.789	597.996	572.088	481.394	437.381	534.489	499.974	583.218	-0.34543	1.7639e-05	0.0001512	RP23-315C11.9	chr12	+	81492199	81497015	3375	antisense	predicted_gene_28370	477	444	435	408	296	404	595	651	519	492	374	558	417	584	7.0305	5.36683	5.19159	5.70615	4.98907	5.33889	6.74288	7.91597	7.38547	6.32029
ENSMUSG00000027475	2663.87	2586.16	2765.22	2791.37	2838.11	2817.83	2683.48	3378.54	3540.55	3585.99	3397.3	3475.14	3641.3	3342.52	-0.34532	1.7354e-28	1.1966e-26	Kif3b	chr2	+	153291413	153333390	5635	protein_coding	kinesin_family_member_3B	2548	2994	3248	2771	2348	2953	3370	3678	3212	3665	2905	3628	3037	3347	22.493	21.6754	23.217	23.2113	23.7031	23.3729	22.8738	26.7864	27.3758	28.1985
ENSMUSG00000041534	89697.6	93916.3	85437.5	96981.7	92357.1	98724.1	88514.1	117518	122211	118867	120007	112133	111622	119658	-0.34529	1.9866e-23	1.0198e-21	Rbp3	chr14	+	33954022	33964216	5276	protein_coding	retinol_binding_protein_3_interstitial	85796	108727	100354	96274	76408	103460	111159	127934	110870	121486	102617	117065	93098	119818	808.917	840.701	766.151	861.313	823.826	874.603	805.827	995.126	1009.24	998.314
ENSMUSG00000037960	403.554	393.884	417.167	438.198	404.926	420.813	408.494	515.324	550.042	451.062	573.039	503.837	552.729	549.264	-0.34504	9.8769e-10	1.7073e-08	1110007C09Rik	chr13	-	49202951	49216026	804	protein_coding	RIKEN_cDNA_1110007C09_gene	386	456	490	435	335	441	513	561	499	461	490	526	461	550	23.8821	23.1376	24.5485	25.5382	23.7023	24.4639	24.4041	28.6354	29.8077	24.8594
ENSMUSG00000098066	55.4102	83.7867	77.4739	67.4925	74.9416	86.8345	89.9801	101.962	102.513	90.9952	114.608	101.534	65.9438	128.827	-0.34497	0.0044382	0.018798	Gm26944	chr7	+	92639739	92647442	677	lincRNA	predicted_gene_26944	53	97	91	67	62	91	113	111	93	93	98	106	55	129	3.8943	5.8451	5.41424	4.67135	5.2096	5.99509	6.38398	6.7287	6.59749	5.9558
ENSMUSG00000004698	1685.31	1725.83	1571.61	1721.56	1658.39	1652.72	1778.9	2053.03	2363.31	2098.76	2157.67	2095.81	1948.34	2312.9	-0.34438	4.3579e-15	1.3241e-13	Hdac9	chr12	-	34371503	34528889	4422	protein_coding	histone_deacetylase_9	1612	1998	1846	1709	1372	1732	2234	2235	2144	2145	1845	2188	1625	2316	18.1338	18.4326	16.815	18.2423	17.6497	17.4692	19.3226	20.7422	23.2858	21.0307
ENSMUSG00000032593	224.777	150.298	262.219	268.963	198.233	208.021	201.46	297.62	325.175	211.344	257.283	349.621	270.969	259.652	-0.3439	0.0016187	0.0080442	Amigo3	chr9	+	108053159	108055701	2543	protein_coding	adhesion_molecule_with_Ig_like_domain_3	215	174	308	267	164	218	253	324	295	216	220	365	226	260	4.20566	2.79133	4.87853	4.95589	3.66859	3.82343	3.80519	5.22872	5.57135	3.68259
ENSMUSG00000049739	1117.61	1046.9	1037.81	1049.66	1079.4	1179.42	1063.84	1386.14	1370.14	1341.44	1368.28	1472.24	1436.38	1259.31	-0.34265	5.2466e-16	1.6874e-14	Zfp646	chr7	+	127876796	127885996	6310	protein_coding	zinc_finger_protein_646	1069	1212	1219	1042	893	1236	1336	1509	1243	1371	1170	1537	1198	1261	8.42733	7.83578	7.78142	7.79462	8.05051	8.7364	8.09803	9.81424	9.46076	9.42006
ENSMUSG00000020782	3037.11	2714.86	3328.82	3390.74	3440.06	3107.91	3007.56	4242.93	3929.66	4058.58	3872.11	4131.27	4125.68	3679.07	-0.34245	2.4414e-12	5.7096e-11	Llgl2	chr11	+	115824049	115855780	3612	protein_coding	lethal_giant_larvae_homolog_2_(Drosophila)	2905	3143	3910	3366	2846	3257	3777	4619	3565	4148	3311	4313	3441	3684	40.0074	35.4981	43.6027	43.9869	44.8217	40.2173	39.9946	52.4804	47.402	49.7894
ENSMUSG00000024301	76.3197	63.9198	102.163	87.6396	93.0726	81.1091	79.6284	137.787	131.172	98.8227	104.083	111.112	81.5305	95.8715	-0.342	0.0033848	0.014992	Kifc5b	chr17	+	26917091	26932579	2627	protein_coding	kinesin_family_member_C5B	73	74	120	87	77	85	100	150	119	101	89	116	68	96	1.38231	1.14916	1.83995	1.5632	1.66737	1.44312	1.45593	2.3433	2.17556	1.66689
ENSMUSG00000035919	2132.77	2299.38	2252.7	2197.03	2224.07	2422.78	2096.62	2788.81	2893.51	2718.11	2987.99	2987.58	2594.59	2889.13	-0.34183	2.0261e-17	7.3229e-16	Bbs9	chr9	+	22475715	22888280	3495	protein_coding	Bardet-Biedl_syndrome_9_(human)	2040	2662	2646	2181	1840	2539	2633	3036	2625	2778	2555	3119	2164	2893	29.0352	31.072	30.4949	29.4554	29.9483	32.401	28.8141	35.6493	36.0717	34.4612
ENSMUSG00000015766	1424.98	1425.24	1484.77	1513.04	1474.66	1443.74	1356.07	1759.08	1818.78	1734.78	1985.76	2018.22	1764.9	1784.61	-0.34176	5.6241e-16	1.7995e-14	Eps8	chr6	-	137477245	137654876	4567	protein_coding	epidermal_growth_factor_receptor_pathway_substrate_8	1363	1650	1744	1502	1220	1513	1703	1915	1650	1773	1698	2107	1472	1787	14.8459	14.7388	15.3815	15.5237	15.196	14.7758	14.2622	17.2082	17.3515	16.8315
ENSMUSG00000027332	2144.27	1978.92	2124.15	2224.23	1907.38	1992.42	2045.65	2927.52	2595.89	2353.15	2535.4	2742.37	2782.83	2417.76	-0.34171	4.7604e-12	1.0769e-10	Ivd	chr2	+	118861954	118882909	3665	protein_coding	isovaleryl_coenzyme_A_dehydrogenase	2051	2291	2495	2208	1578	2088	2569	3187	2355	2405	2168	2863	2321	2421	27.8377	25.5012	27.4209	28.4369	24.4926	25.4097	26.8097	35.6866	30.8604	28.4503
ENSMUSG00000003134	3324.61	3087.15	3388.42	3762.46	3286.55	3471.47	3371.47	4395.41	4662.68	4126.09	4298.96	4535.49	4006.98	4090.52	-0.34125	7.0976e-15	2.1288e-13	Tbc1d8	chr1	-	39371499	39478747	4436	protein_coding	TBC1_domain_family_member_8	3180	3574	3980	3735	2719	3638	4234	4785	4230	4217	3676	4735	3342	4096	35.6597	32.8679	36.139	39.7425	34.8674	36.5775	36.5058	44.2677	45.7966	41.2152
ENSMUSG00000055926	87.82	88.1056	68.1089	74.544	60.4368	64.8873	97.9429	83.5909	116.843	97.8443	98.2352	115.902	100.714	97.8688	-0.34103	0.0025969	0.012011	Gm14137	chr2	+	119174509	119177575	3067	protein_coding	predicted_gene_14137	84	102	80	74	50	68	123	91	106	100	84	121	84	98	1.36241	1.35674	1.05066	1.13887	0.92738	0.988868	1.53389	1.21766	1.65988	1.41362
ENSMUSG00000057054	51.2283	44.9166	51.933	40.2941	42.3057	41.0317	45.3882	62.4635	63.9327	50.879	58.4734	50.7669	52.755	78.8942	-0.34095	0.0073243	0.028342	Inca1	chr11	-	70688361	70700155	1255	protein_coding	inhibitor_of_CDK_cyclin_A1_interacting_protein_1	49	52	61	40	35	43	57	68	58	52	50	53	44	79	1.9422	1.69032	1.95781	1.50443	1.58645	1.52816	1.73713	2.22363	2.21957	1.79641
ENSMUSG00000005609	2546.78	2434.13	2396.58	2435.78	2463.4	2588.81	2494.76	3158.08	3475.52	3125.15	3099.09	3148.5	3150.91	2875.15	-0.34017	3.1732e-20	1.3631e-18	Ctr9	chr7	+	111028951	111056377	4300	protein_coding	Ctr9_Paf1/RNA_polymerase_II_complex_component_homolog_(S._cerevisiae)	2436	2818	2815	2418	2038	2713	3133	3438	3153	3194	2650	3287	2628	2879	28.1806	26.7351	26.369	26.5427	26.9611	28.14	27.8672	32.8121	35.216	32.2042
ENSMUSG00000056598	441.191	440.528	456.33	449.279	473.824	500.014	446.715	611.775	593.031	572.389	595.259	559.393	522.754	619.17	-0.33997	4.735e-11	9.5445e-10	Lrrc48	chr11	+	60353329	60394341	2438	protein_coding	leucine_rich_repeat_containing_48	422	510	536	446	392	524	561	666	538	585	509	584	436	620	8.61034	8.53386	8.85555	8.63491	9.14647	9.58608	8.80098	11.2108	10.5982	10.4032
ENSMUSG00000072640	1553.58	1551.35	1277.89	1461.67	1332.03	1441.83	1701.66	1984.13	2018.29	1691.73	1765.9	1885.08	1674.97	2148.12	-0.33997	1.34e-07	1.7034e-06	Lyrm9	chr11	+	78826584	78846870	8035	protein_coding	LYR_motif_containing_9	1486	1796	1501	1451	1102	1511	2137	2160	1831	1729	1510	1968	1397	2151	9.19972	9.11862	7.52453	8.5239	7.80184	8.3873	10.1723	11.0323	10.9443	9.32942
ENSMUSG00000029910	248.823	266.908	228.165	236.728	212.737	255.732	268.348	327.015	324.073	349.304	285.35	295.98	326.122	291.609	-0.33978	9.5682e-07	1.0456e-05	Mad2l1	chr6	+	66535390	66541033	1725	protein_coding	MAD2_mitotic_arrest_deficient-like_1	238	309	268	235	176	268	337	356	294	357	244	309	272	292	6.86325	7.30766	6.25792	6.43036	5.80397	6.92929	7.4721	8.4695	8.18545	8.97274
ENSMUSG00000020599	13192.9	13919.8	12647	14671.1	13036.2	13759	13129.9	16076.1	18724.6	16377.2	17042.6	17801	17193.3	16511.9	-0.33944	6.4181e-18	2.4034e-16	Rgs9	chr11	-	109225355	109298129	3464	protein_coding	regulator_of_G-protein_signaling_9	12619	16115	14855	14564	10785	14419	16489	17501	16987	16738	14573	18584	14340	16534	181.213	189.785	172.735	198.454	177.11	185.652	182.062	207.339	235.518	209.494
ENSMUSG00000027589	14150.5	14634.2	15173.8	16557.8	14721.2	15311.5	14544.1	18698.6	19699	19292.9	18333.7	19387.2	19411.5	18410.3	-0.33934	6.165e-24	3.2821e-22	Pcmtd2	chr2	+	181837854	181857461	3569	protein_coding	protein-L-isoaspartate_(D-aspartate)_O-methyltransferase_domain_containing_2	13535	16942	17823	16437	12179	16046	18265	20356	17871	19718	15677	20240	16190	18435	188.649	193.654	201.149	217.387	194.118	200.523	195.738	234.068	240.484	239.531
ENSMUSG00000020640	2608.46	2511.01	2477.46	2675.53	2337.69	2653.7	2389.65	2912.82	3504.17	3121.23	3244.1	3376.48	3146.12	3110.83	-0.33931	4.5253e-15	1.3727e-13	Itsn2	chr12	+	4593008	4713950	5987	protein_coding	intersectin_2	2495	2907	2910	2656	1934	2781	3001	3171	3179	3190	2774	3525	2624	3115	20.7302	19.8082	19.578	20.9399	18.3759	20.7174	19.1716	21.7362	25.5015	23.1008
ENSMUSG00000027674	9349.69	9105.97	10137.2	10460.3	9866.91	10246.5	8892.1	12228.1	12037	12282.4	12754.2	12550	12957.4	11535.5	-0.33924	1.4359e-17	5.2507e-16	Pex5l	chr3	-	32949408	33143247	3164	protein_coding	peroxisomal_biogenesis_factor_5-like	8943	10542	11907	10384	8163	10738	11167	13312	10920	12553	10906	13102	10807	11551	140.601	135.924	151.583	154.912	146.762	151.367	134.99	172.665	165.757	172.011
ENSMUSG00000037446	25742.8	22864.3	24292.7	26612.2	25802.9	25912	23473.7	34553.3	34051.9	29406.1	30293.9	31954.4	29587.2	31943.2	-0.33924	1.9819e-14	5.6539e-13	Tulp1	chr17	-	28351515	28365182	2179	protein_coding	tubby_like_protein_1	24623	26470	28534	26418	21347	27155	29479	37616	30892	30054	25904	33360	24677	31986	562.115	495.571	527.461	572.268	557.29	555.822	517.437	708.455	680.884	597.986
ENSMUSG00000070407	2936.74	2706.22	2775.44	2930.38	3049.64	3006.76	2978.9	3816.7	3885.57	3536.09	3723.58	3608.28	3795.96	3471.35	-0.33898	4.9307e-21	2.2148e-19	Hs3st3b1	chr11	-	63885792	63922290	4911	protein_coding	heparan_sulfate_(glucosamine)_3-O-sulfotransferase_3B1	2809	3133	3260	2909	2523	3151	3741	4155	3525	3614	3184	3767	3166	3476	28.4527	26.0255	26.7382	27.9596	29.2246	28.6168	29.1353	34.7215	34.4726	31.9054
ENSMUSG00000085667	285.415	254.815	291.165	350.558	278.009	278.634	271.533	364.677	429.892	327.778	348.501	357.284	401.658	340.543	-0.33887	5.2921e-06	5.0402e-05	Gm12992	chr4	-	131899478	131920029	4493	processed_transcript	predicted_gene_12992	273	295	342	348	230	292	341	397	390	335	298	373	335	341	3.02251	2.67852	3.06601	3.65594	2.91201	2.89861	2.90282	3.62619	4.16882	3.23262
ENSMUSG00000023572	2354.41	2448.82	2256.11	2362.24	2261.54	2450.45	2213.67	3153.49	2916.66	2916.74	2889.75	2972.26	2930.3	2925.08	-0.33857	1.4198e-24	7.9431e-23	Ccndbp1	chr2	+	121008403	121016904	1632	protein_coding	cyclin_D-type_binding-protein_1	2252	2835	2650	2345	1871	2568	2780	3433	2646	2981	2471	3103	2444	2929	68.642	70.8666	65.4049	67.8234	65.2161	70.1808	65.1518	86.3278	77.8671	79.1931
ENSMUSG00000003184	980.656	840.458	1086.34	938.851	827.984	919.873	940.411	1360.42	1183.86	1139.89	1088.77	1270.13	1266.12	1023.63	-0.33846	2.2998e-07	2.8235e-06	Irf3	chr7	+	44997648	45002848	2031	protein_coding	interferon_regulatory_factor_3	938	973	1276	932	685	964	1181	1481	1074	1165	931	1326	1056	1025	22.9739	19.5439	25.3061	21.6602	19.1859	21.1695	22.2404	29.9256	25.3968	24.8692
ENSMUSG00000087138	59.5921	54.4182	61.298	55.4043	50.7669	48.6655	50.9622	73.4865	71.6487	58.7066	73.6764	55.5562	82.7295	83.8875	-0.33807	0.0045944	0.01934	Gm15545	chr7	+	44986900	44994597	1059	processed_transcript	predicted_gene_15545	57	63	72	55	42	51	64	80	65	60	63	58	69	84	2.67745	2.42691	2.73855	2.45145	2.25608	2.14792	2.31146	3.10021	2.94783	2.45641
ENSMUSG00000098488	60.6376	40.5977	62.1494	52.3823	54.3931	62.9789	51.7585	66.1378	79.3648	81.2107	54.965	75.6714	71.9387	71.9036	-0.3379	0.0049446	0.020596	Pla2g4b	chr2	+	120033417	120043030	4240	protein_coding	phospholipase_A2_group_IVB_(cytosolic)	58	47	73	52	45	66	65	72	72	83	47	79	60	72	0.680462	0.452211	0.693492	0.578887	0.603737	0.694259	0.58634	0.696889	0.815551	0.848707
ENSMUSG00000085929	86.7745	83.7867	86.8388	85.6249	76.1503	68.7042	75.647	100.125	137.786	87.0814	94.7268	106.323	100.714	103.861	-0.33765	0.0014679	0.0073876	Gm13421	chr2	+	27540426	27543362	803	processed_transcript	predicted_gene_13421	83	97	102	85	63	72	95	109	125	89	81	111	84	104	5.14167	4.92794	5.11646	4.99643	4.46299	3.99908	4.52491	5.57068	7.47617	4.8053
ENSMUSG00000096926	72.1378	73.4213	103.015	80.5881	74.9416	86.8345	94.7578	112.067	133.377	102.736	80.6932	116.86	99.5152	116.843	-0.33752	0.0022548	0.010659	Gm26823	chr18	-	31859082	31861764	2361	lincRNA	predicted_gene_26823	69	85	121	80	62	91	119	122	121	105	69	122	83	117	1.45377	1.4687	2.06431	1.59938	1.49382	1.71905	1.92776	2.12061	2.46135	1.92814
ENSMUSG00000024251	899.109	888.83	899.889	888.484	850.95	926.553	967.485	969.103	1225.74	1101.73	1244.31	1291.2	1100.66	1107.52	-0.33693	1.7689e-09	2.9381e-08	Thada	chr17	-	84190056	84466196	7884	protein_coding	thyroid_adenoma_associated	860	1029	1057	882	704	971	1215	1055	1112	1126	1064	1348	918	1109	5.42617	5.32449	5.40024	5.28054	5.07958	5.49308	5.89429	5.49165	6.77396	6.19209
ENSMUSG00000033717	826.971	779.994	810.496	756.521	796.557	739.525	811.413	1089.44	1209.21	921.693	958.963	960.739	895.636	981.684	-0.33677	1.2018e-08	1.7585e-07	Adra2a	chr19	+	54045182	54048982	3801	protein_coding	adrenergic_receptor_alpha_2a	791	903	952	751	659	775	1019	1186	1097	942	820	1003	747	983	10.3519	9.69167	10.0884	9.32607	9.86254	9.09384	10.2536	12.8051	13.861	10.7448
ENSMUSG00000008206	4477.77	3901.7	4370.89	4597.55	4138.71	4504.9	4338.15	5377.37	5812.37	5265.98	5128.11	5931.1	5635.2	5272.93	-0.33662	1.7284e-15	5.3919e-14	Cers4	chr8	+	4493026	4531680	9475	protein_coding	ceramide_synthase_4	4283	4517	5134	4564	3424	4721	5448	5854	5273	5382	4385	6192	4700	5280	22.4859	19.4482	21.8253	22.7365	20.5568	22.2228	21.9918	25.3554	26.7278	24.6269
ENSMUSG00000097145	149.503	140.796	125.15	111.816	85.8202	119.278	125.017	119.416	185.184	172.206	166.064	193.489	119.898	160.784	-0.33621	0.0031999	0.014308	9230114K14Rik	chr5	+	52190681	52197984	2118	lincRNA	RIKEN_cDNA_9230114K14_gene	143	163	147	111	71	125	157	130	168	176	142	202	100	161	3.35855	3.13957	2.79561	2.47374	1.90693	2.63225	2.83515	2.51892	3.8095	3.60274
ENSMUSG00000042743	2124.41	2067.89	1673.78	1734.66	1903.76	1804.44	2087.86	2537.12	2939.8	2303.25	2218.48	2312.29	2179.74	2560.57	-0.3361	4.0745e-07	4.7735e-06	Sgtb	chr13	+	104109741	104141735	3048	protein_coding	small_glutamine-rich_tetratricopeptide_repeat_(TPR)-containing_beta	2032	2394	1966	1722	1575	1891	2622	2762	2667	2354	1897	2414	1818	2564	33.1627	32.0419	25.9808	26.667	29.3946	27.6707	32.9018	37.1882	42.0235	33.484
ENSMUSG00000021418	54.3647	67.3749	49.3789	48.3529	36.2621	47.7113	45.3882	71.6493	79.3648	71.4263	63.1512	68.9663	47.9591	56.9237	-0.33588	0.0093061	0.034696	Rpp40	chr13	-	35893472	35906359	4380	protein_coding	ribonuclease_P_40_subunit	52	78	58	48	30	50	57	78	72	73	54	72	40	57	0.590569	0.72649	0.533382	0.517278	0.389627	0.509142	0.49774	0.730832	0.789483	0.722594
ENSMUSG00000020829	705.696	663.383	740.684	689.028	655.135	747.158	716.656	1021.46	859.785	826.784	757.815	972.233	859.667	945.732	-0.3356	2.2707e-08	3.2071e-07	Slc46a1	chr11	+	78465697	78472059	1978	protein_coding	solute_carrier_family_46_member_1	675	768	870	684	542	783	900	1112	780	845	648	1015	717	947	16.9754	15.8396	17.7165	16.3225	15.5874	17.6555	17.4028	23.0715	18.9388	18.5215
ENSMUSG00000071656	155.776	176.211	169.421	163.191	203.068	183.211	190.312	192.902	206.128	201.559	219.86	288.317	218.214	262.648	-0.3348	0.0002382	0.0015129	Lrrn4cl	chr19	+	8850785	8853909	2583	protein_coding	LRRN4_C-terminal_like	149	204	199	162	168	192	239	210	187	206	188	301	182	263	2.86948	3.22192	3.10322	2.96038	3.69987	3.31528	3.53896	3.33651	3.47698	3.45771
ENSMUSG00000020131	499.737	448.302	478.465	509.72	536.679	461.845	511.214	707.307	626.1	599.785	564.853	635.065	610.28	615.175	-0.33469	2.0969e-09	3.4401e-08	Pcsk4	chr10	-	80321283	80329498	2772	protein_coding	proprotein_convertase_subtilisin/kexin_type_4	478	519	562	506	444	484	642	770	568	613	483	663	509	616	8.57781	7.63806	8.16634	8.61616	9.11153	7.78745	8.85817	11.3997	9.84101	9.58767
ENSMUSG00000040009	2095.13	2098.12	1975.16	2008.66	2086.28	1988.61	2149.17	2639.08	2821.86	2630.05	2490.97	2463.63	2433.92	2718.36	-0.33413	1.7389e-18	6.7414e-17	Gnaz	chr10	+	74967177	75016907	3519	protein_coding	guanine_nucleotide_binding_protein_alpha_z_subunit	2004	2429	2320	1994	1726	2084	2699	2873	2560	2688	2130	2572	2030	2722	28.3283	28.159	26.5554	26.7462	27.9012	26.4132	29.335	33.5053	34.9386	33.1174
ENSMUSG00000028906	16338.7	15913.4	17662.3	17799.9	17119.3	18465.2	16132.7	19816.5	20468.4	22673.4	22513.4	21973.4	22492.8	21036.8	-0.33377	3.7622e-16	1.2226e-14	Epb4.1	chr4	-	131923413	132075321	6565	protein_coding	erythrocyte_protein_band_4.1	15628	18423	20746	17670	14163	19351	20260	21573	18569	23173	19251	22940	18760	21065	118.416	114.481	127.287	127.045	122.722	131.466	118.034	134.857	135.843	153.036
ENSMUSG00000086638	314.688	322.19	381.41	428.124	331.194	378.827	485.733	464.802	472.882	390.399	500.532	542.152	442.423	576.227	-0.33262	0.0003117	0.0019204	4930405A21Rik	chr2	-	156714540	156720909	994	processed_transcript	RIKEN_cDNA_4930405A21_gene	301	373	448	425	274	397	610	506	429	399	428	566	369	577	15.0634	15.3085	18.1542	20.1818	15.6807	17.8134	23.4718	20.8911	20.7279	17.4033
ENSMUSG00000024901	2293.77	2407.36	2790.76	2690.64	2787.34	2439	2344.26	3226.06	3132.7	3357.04	3241.76	3080.5	3141.32	3253.64	-0.33258	7.6545e-13	1.8845e-11	Peli3	chr19	-	4930651	4943127	2988	protein_coding	pellino_3	2194	2787	3278	2671	2306	2556	2944	3512	2842	3431	2772	3216	2620	3258	36.5256	38.0509	44.1889	42.1939	43.9016	38.1526	37.6842	48.236	45.6802	49.7835
ENSMUSG00000028295	264.505	266.908	261.368	254.86	228.451	271.954	257.996	309.562	313.05	318.972	332.129	336.211	333.316	352.527	-0.33244	5.2403e-08	7.0599e-07	Smim8	chr4	-	34768664	34778423	935	protein_coding	small_integral_membrane_protein_8	253	309	307	253	189	285	324	337	284	326	284	351	278	353	13.4602	13.482	13.2255	12.7722	11.4988	13.5949	13.2536	14.7916	14.5878	15.1165
ENSMUSG00000048832	1243.07	1185.97	1282.15	1399.21	1287.3	1253.85	1392.7	1702.13	1555.33	1544.96	1584.63	1712.66	1597.04	1726.68	-0.33229	8.1694e-14	2.2285e-12	Vps37c	chr19	+	10688815	10714419	2415	protein_coding	vacuolar_protein_sorting_37C_(yeast)	1189	1373	1506	1389	1065	1314	1749	1853	1411	1579	1355	1788	1332	1729	24.491	23.1933	25.1184	27.1482	25.0861	24.2673	27.6997	31.4887	28.0604	28.3472
ENSMUSG00000025036	517.511	450.03	617.237	688.021	565.688	553.451	523.955	707.307	699.953	797.431	726.239	758.629	718.188	577.226	-0.33219	2.1214e-05	0.00017752	Sfxn2	chr19	+	46573365	46596898	3210	protein_coding	sideroflexin_2	495	521	725	683	468	580	658	770	635	815	621	792	599	578	7.67082	6.62127	9.0974	10.0432	8.29358	8.05872	7.84012	9.84425	9.50065	11.0077
ENSMUSG00000022701	438.054	375.744	387.369	447.264	345.698	415.088	393.364	540.126	534.61	478.458	493.515	507.669	505.969	490.343	-0.33214	1.3528e-08	1.9657e-07	2610015P09Rik	chr16	+	43889800	43964314	3779	protein_coding	RIKEN_cDNA_2610015P09_gene	419	435	455	444	286	435	494	588	485	489	422	530	422	491	5.51542	4.69593	4.84975	5.54578	4.30517	5.134	4.99979	6.38554	6.16381	5.61019
ENSMUSG00000090086	1536.85	1105.64	1337.49	1511.03	1118.08	1283.43	1671.4	1818.79	2002.86	1492.12	1529.66	1924.35	1701.35	1731.68	-0.33163	6.4118e-05	0.00048156	AI480526	chr5	-	123133723	123141666	1697	lincRNA	expressed_sequence_AI480526	1470	1280	1571	1500	925	1345	2099	1980	1817	1525	1308	2009	1419	1734	43.0901	30.7707	37.2888	41.7221	31.0071	35.3495	47.3078	47.8829	51.423	38.9613
ENSMUSG00000043290	249.869	234.085	211.138	227.661	241.747	214.701	234.904	298.539	264.549	260.266	292.367	295.98	288.954	345.537	-0.33147	3.2262e-06	3.1998e-05	Zfp784	chr7	-	5034439	5038446	2153	protein_coding	zinc_finger_protein_784	239	271	248	226	200	225	295	325	240	266	250	309	241	346	5.52199	5.13493	4.63972	4.95474	5.2843	4.66103	5.24059	6.19493	5.35367	5.35653
ENSMUSG00000026213	1127.02	1055.54	1063.35	1186.66	1041.93	1148.89	1092.5	1461.46	1444	1300.35	1378.8	1409.98	1414.79	1328.22	-0.33145	5.6399e-16	1.8015e-14	Stk11ip	chr1	+	75521529	75537335	4458	protein_coding	serine/threonine_kinase_11_interacting_protein	1078	1222	1249	1178	862	1204	1372	1591	1310	1329	1179	1472	1180	1330	12.0287	11.1825	11.2851	12.4727	10.9994	12.0456	11.7711	14.6463	14.1129	12.925
ENSMUSG00000031755	2105.59	2003.11	2029.64	2110.4	2083.86	2050.63	2141.21	2747.48	2734.78	2441.21	2676.91	2660.95	2587.39	2463.7	-0.33134	1.0905e-21	5.0687e-20	Bbs2	chr8	-	94067954	94098811	2947	protein_coding	Bardet-Biedl_syndrome_2_(human)	2014	2319	2384	2095	1724	2149	2689	2991	2481	2495	2289	2778	2158	2467	33.9955	32.1018	32.5845	33.5553	33.2781	32.5237	34.899	41.6518	40.4325	36.7059
ENSMUSG00000086158	309.461	286.775	269.03	294.147	307.019	305.352	251.626	383.967	362.653	348.326	357.857	335.253	374.081	393.472	-0.33104	1.7989e-07	2.244e-06	Ccpg1os	chr9	-	72979722	72985382	1929	protein_coding	cell_cycle_progression_1_opposite_strand	296	332	316	292	254	320	316	418	329	356	306	350	312	394	7.63311	7.02125	6.59841	7.14508	7.49036	7.3988	6.26552	8.89285	8.19121	8.00135
ENSMUSG00000019718	163.094	175.347	120.893	156.139	155.927	122.141	198.275	202.088	208.333	234.826	177.759	157.09	227.806	199.732	-0.33074	0.0016495	0.0081653	L3hypdh	chr12	-	72073428	72085439	1952	protein_coding	L-3-hydroxyproline_dehydratase_(trans-)	156	203	142	155	129	128	249	220	189	240	152	164	190	200	3.97545	4.24253	2.93017	3.74808	3.75934	2.92465	4.8789	4.6253	4.65014	5.33061
ENSMUSG00000098041	134.866	142.524	142.177	131.963	96.6988	169.852	149.701	175.449	196.207	141.874	173.081	217.435	151.071	193.74	-0.33068	0.001448	0.0073049	Gm26981	chr7	+	92729840	92733748	3169	lincRNA	predicted_gene_26981	129	165	167	131	80	178	188	191	178	145	148	227	126	194	2.02493	2.12408	2.12265	1.95122	1.43605	2.50519	2.26902	2.47348	2.69763	1.98377
ENSMUSG00000042616	464.191	519.996	508.263	473.455	483.494	440.852	445.919	623.716	600.747	590.001	560.175	619.739	588.698	629.156	-0.33063	1.3299e-10	2.5357e-09	Oscp1	chr4	+	126058565	126092195	5013	protein_coding	organic_solute_carrier_partner_1	444	602	597	470	400	462	560	679	545	603	479	647	491	630	4.40582	4.899	4.79691	4.42544	4.53904	4.11043	4.2726	5.55865	5.22136	5.21513
ENSMUSG00000037341	699.423	760.991	692.157	740.403	756.668	729.028	785.136	819.374	896.16	888.426	1039.66	1023.96	872.856	992.669	-0.33057	2.8184e-09	4.5361e-08	Slc9a7	chrX	-	20105755	20291807	2512	protein_coding	solute_carrier_family_9_(sodium/hydrogen_exchanger)_member_7	669	881	813	735	626	764	986	892	813	908	889	1069	728	994	13.2479	14.3075	13.0363	13.811	14.1761	13.5649	15.0127	14.5728	15.5437	15.6715
ENSMUSG00000035121	139.048	108.836	107.271	129.948	87.029	133.592	142.535	199.332	174.162	145.788	120.455	145.596	146.275	162.782	-0.33008	0.0025489	0.011827	Neil2	chr14	-	63182443	63193541	1932	protein_coding	nei_like_2_(E._coli)	133	126	126	129	72	140	179	217	158	149	103	152	122	163	3.42441	2.66056	2.62693	3.15166	2.11996	3.23195	3.54363	4.60946	3.92766	3.34368
ENSMUSG00000046056	144.276	91.5607	91.0956	125.919	84.6115	115.461	133.776	132.276	157.627	145.788	136.828	176.247	121.097	145.805	-0.33002	0.0031884	0.014267	Sbsn	chr7	+	30734739	30756134	2460	protein_coding	suprabasin	138	106	107	125	70	121	168	144	143	149	117	184	101	146	2.79052	1.75784	1.752	2.39845	1.61869	2.19378	2.61202	2.40228	2.79181	2.62601
ENSMUSG00000020886	16515.4	14533.1	17257.9	18287.5	16573	16803	16231.5	20834.3	21979.6	19781.2	20756.9	21292.4	20925.8	20904	-0.32989	3.4719e-16	1.1322e-14	Dlg4	chr11	+	70017085	70045532	3457	protein_coding	discs_large_homolog_4_(Drosophila)	15797	16825	20271	18154	13711	17609	20384	22681	19940	20217	17749	22229	17453	20932	227.309	198.548	236.189	247.873	225.617	227.184	225.524	269.253	277.019	253.55
ENSMUSG00000020812	125.457	102.79	126.001	113.831	107.577	106.873	150.498	162.589	153.218	135.025	147.353	134.101	157.066	181.756	-0.32972	0.00070186	0.0039114	1810032O08Rik	chr11	+	116671660	116675799	1988	protein_coding	RIKEN_cDNA_1810032O08_gene	120	119	148	113	89	112	189	177	139	138	126	140	131	182	3.00266	2.44197	2.99868	2.68299	2.54668	2.51273	3.6362	3.65388	3.35802	3.0096
ENSMUSG00000026283	500.783	475.079	395.883	422.08	384.378	474.25	473.789	575.95	590.827	547.928	597.598	540.236	581.504	530.289	-0.32972	6.7312e-08	8.8952e-07	Ing5	chr1	+	93803965	93822101	4538	protein_coding	inhibitor_of_growth_family_member_5	479	550	465	419	318	497	595	627	536	560	511	564	485	531	5.25065	4.94433	4.12737	4.35819	3.98625	4.88467	5.01481	5.67022	5.67263	5.35019
ENSMUSG00000039307	1135.39	1063.31	1229.37	1216.88	1240.16	1116.44	1112.41	1647.93	1604.93	1374.71	1369.45	1485.65	1408.8	1347.19	-0.32961	5.7156e-10	1.022e-08	Hexdc	chr11	+	121204433	121222655	3921	protein_coding	hexosaminidase_(glycosyl_hydrolase_family_20_catalytic_domain)_containing	1086	1231	1444	1208	1026	1170	1397	1794	1456	1405	1171	1551	1175	1349	13.7776	12.8077	14.8339	14.5421	14.8851	13.3086	13.627	18.7768	17.834	15.5355
ENSMUSG00000078902	81.5471	69.1024	80.0279	87.6396	56.8106	71.5669	78.0358	95.5324	121.252	89.0383	84.2016	93.8708	92.3213	101.863	-0.32938	0.0022978	0.010831	Gm14443	chr2	-	175166255	175175871	4516	protein_coding	predicted_gene_14443	78	80	94	87	47	75	98	104	110	91	72	98	77	102	0.859177	0.722678	0.838414	0.909331	0.592032	0.740714	0.829993	0.945097	1.16983	0.873641
ENSMUSG00000046761	135.912	145.115	131.961	162.184	153.509	131.683	119.443	179.123	168.65	165.357	178.928	185.826	160.663	202.728	-0.32901	0.00010336	0.00073495	Fam83h	chr15	-	76001093	76014336	4534	protein_coding	family_with_sequence_similarity_83_member_H	130	168	155	161	127	138	150	195	153	169	153	194	134	203	1.42628	1.5116	1.377	1.6761	1.5934	1.3575	1.26535	1.76502	1.62067	1.61604
ENSMUSG00000035842	120.23	82.0591	105.569	112.823	149.883	115.461	139.35	137.787	156.525	155.572	139.167	179.121	193.035	106.857	-0.32899	0.0055058	0.022463	Ddx11	chr17	+	66123520	66152167	4149	protein_coding	DEAD/H_(Asp-Glu-Ala-Asp/His)_box_helicase_11	115	95	124	112	124	121	175	150	142	159	119	187	161	107	1.37878	0.934091	1.20382	1.27418	1.70012	1.30072	1.61323	1.4837	1.64373	1.6615
ENSMUSG00000041417	2248.82	2432.41	2195.66	2322.95	2357.03	2209.99	2356.2	2835.66	3161.36	2937.28	2755.26	2838.16	2870.35	2899.11	-0.32889	2.7642e-20	1.1929e-18	Pik3r1	chr13	-	101680563	101768217	7113	protein_coding	phosphatidylinositol_3-kinase_regulatory_subunit_polypeptide_1_(p85_alpha)	2151	2816	2579	2306	1950	2316	2959	3087	2868	3002	2356	2963	2394	2903	15.0428	16.1506	14.6044	15.3025	15.5949	14.5221	15.9109	17.8107	19.3647	18.298
ENSMUSG00000034349	866.7	906.969	752.603	743.425	739.746	809.183	707.1	1027.89	1104.49	935.391	968.319	925.298	974.769	1048.59	-0.32886	2.0438e-08	2.8998e-07	Smc4	chr3	+	69004738	69034623	4316	protein_coding	structural_maintenance_of_chromosomes_4	829	1050	884	738	612	848	888	1119	1002	956	828	966	813	1050	9.55465	9.92468	8.25003	8.07108	8.06624	8.7631	7.86925	10.6401	11.1499	9.60334
ENSMUSG00000025759	450.6	446.574	423.978	453.308	435.145	422.722	411.679	505.22	620.588	578.26	519.243	590.045	511.964	515.309	-0.32845	8.6099e-09	1.284e-07	Mfsd8	chr3	-	40818070	40846885	3184	protein_coding	major_facilitator_superfamily_domain_containing_8	431	517	498	450	360	443	517	550	563	591	444	616	427	516	6.73358	6.62409	6.3	6.67108	6.43177	6.20546	6.2104	7.08903	8.49219	8.04748
ENSMUSG00000011179	2684.78	2772.74	2587.29	2534.5	2636.25	2725.27	2224.02	3018.46	2872.56	3246.47	3463.96	3330.5	3443.46	3539.25	-0.32811	5.1056e-10	9.1911e-09	Odc1	chr12	+	17544873	17551502	2547	protein_coding	ornithine_decarboxylase_structural_1	2568	3210	3039	2516	2181	2856	2793	3286	2606	3318	2962	3477	2872	3544	50.1543	51.4144	48.0603	46.6271	48.7111	50.0118	41.9415	52.9463	49.1394	56.4798
ENSMUSG00000018427	4273.91	4013.99	3994.59	3978.03	4193.1	4180.46	4518.12	5105.47	5073.83	5037.02	5038.06	5557.53	5265.91	5602.49	-0.32793	1.5536e-18	6.0482e-17	Ypel2	chr11	-	86936425	86993707	4847	protein_coding	yippee-like_2_(Drosophila)	4088	4647	4692	3949	3469	4381	5674	5558	4603	5148	4308	5802	4392	5610	41.9546	39.1119	38.9915	38.4566	40.713	40.3129	44.7732	47.059	45.6092	46.0481
ENSMUSG00000023330	124.412	118.338	134.515	121.89	109.995	138.363	117.054	152.484	151.014	152.637	169.573	129.312	171.454	179.759	-0.32792	0.00022032	0.0014157	Dtwd1	chr2	+	126152141	126165279	1342	protein_coding	DTW_domain_containing_1	119	137	158	121	91	145	147	166	137	156	145	135	143	180	4.41099	4.16463	4.7423	4.25588	3.85736	4.81902	4.18955	5.07636	4.90289	5.03985
ENSMUSG00000097574	195.504	190.032	149.84	185.353	160.762	156.493	187.923	249.854	213.844	222.106	155.539	256.708	201.428	265.644	-0.32789	0.0008712	0.0047255	C920006O11Rik	chr9	+	78175914	78178879	1444	lincRNA	RIKEN_cDNA_C920006O11_gene	187	220	176	184	133	164	236	272	194	227	133	268	168	266	6.44193	6.21533	4.90942	6.01461	5.23945	5.06547	6.25096	7.73034	6.45237	6.8156
ENSMUSG00000025766	512.283	597.736	470.803	536.918	402.509	488.563	578.102	704.552	811.284	576.303	651.393	600.582	570.713	654.123	-0.32781	7.4001e-05	0.00054677	D3Ertd751e	chr3	+	41742611	41759389	4135	protein_coding	DNA_segment_Chr_3_ERATO_Doi_751_expressed	490	692	553	533	333	512	726	767	736	589	557	627	476	655	5.89471	6.82715	5.38684	6.08427	4.5811	5.52253	6.71527	7.61232	8.54844	6.17569
ENSMUSG00000039578	394.144	498.401	468.249	506.698	488.329	473.296	486.529	571.357	648.146	627.182	599.937	573.761	587.499	580.222	-0.32737	3.9999e-09	6.3074e-08	Ccser1	chr6	+	61180324	62382865	5657	protein_coding	coiled-coil_serine_rich_1	377	577	550	503	404	496	611	622	588	641	513	599	490	581	3.3151	4.16101	3.91617	4.19699	4.06253	3.91056	4.13102	4.51233	4.99201	4.91267
ENSMUSG00000043456	1426.03	1572.94	1611.63	1633.92	1600.37	1526.76	1744.66	1880.34	2229.93	1790.55	1989.26	2126.46	2112.6	1896.46	-0.32726	2.9424e-10	5.4492e-09	Zfp536	chr7	-	37472135	37773641	4621	protein_coding	zinc_finger_protein_536	1364	1821	1893	1622	1324	1600	2191	2047	2023	1830	1701	2220	1762	1899	14.6832	16.0762	16.5006	16.5681	16.2987	15.4428	18.1346	18.1794	21.0254	17.1696
ENSMUSG00000089798	371.144	439.664	420.572	517.779	396.465	443.715	436.364	597.996	537.917	463.782	481.82	670.506	593.494	498.332	-0.32726	4.7594e-05	0.00036811	1700028K03Rik	chr5	+	107508944	107551549	5249	protein_coding	RIKEN_cDNA_1700028K03_gene	355	509	494	514	328	465	548	651	488	474	412	700	495	499	3.36429	3.95594	3.79084	4.62214	3.55466	3.95112	3.99306	5.08981	4.46506	3.91514
ENSMUSG00000030636	50.1828	74.2851	68.9602	62.4558	85.8202	41.9859	59.7213	65.2192	72.751	87.0814	74.8459	89.0815	87.5254	99.8661	-0.32725	0.010455	0.038187	1700010L04Rik	chr7	+	82851599	82859849	1015	protein_coding	RIKEN_cDNA_1700010L04_gene	48	86	81	62	71	44	75	71	66	89	64	93	73	100	2.35243	3.45654	3.21443	2.88325	3.97918	1.93344	2.82616	2.87071	3.12293	3.80163
ENSMUSG00000060798	593.83	571.823	517.628	621.536	641.839	602.116	602.787	695.366	737.431	734.81	748.459	770.124	805.713	734.016	-0.32694	1.082e-10	2.0821e-09	Intu	chr3	+	40531286	40704774	6387	protein_coding	inturned_planar_cell_polarity_effector_homolog_(Drosophila)	568	662	608	617	531	631	757	757	669	751	640	804	672	735	4.42378	4.22834	3.83435	4.55979	4.72932	4.40632	4.53316	4.86403	5.03053	5.09787
ENSMUSG00000025758	157.867	162.391	124.299	124.912	158.344	139.317	141.739	153.403	211.639	157.529	194.132	174.332	201.428	195.738	-0.32693	0.00035026	0.0021333	Plk4	chr3	+	40800019	40816883	3479	protein_coding	polo-like_kinase_4	151	188	146	124	131	146	178	167	192	161	166	182	168	196	2.15906	2.20451	1.69037	1.68238	2.14199	1.87172	1.9569	1.96997	2.65052	2.0064
ENSMUSG00000020381	56.4557	55.2819	73.2171	53.3896	53.1844	51.5282	54.9436	64.3007	69.4442	71.4263	85.3711	85.25	62.3468	77.8956	-0.32643	0.0055598	0.022634	3010026O09Rik	chr11	+	50174444	50200115	1142	protein_coding	RIKEN_cDNA_3010026O09_gene	54	64	86	53	44	54	69	70	63	73	73	89	52	78	2.35217	2.28624	3.03331	2.19062	2.19173	2.10897	2.31092	2.51553	2.64947	2.77142
ENSMUSG00000027324	199.686	178.803	160.907	200.463	205.485	195.616	168.016	222.297	229.276	255.373	209.335	247.129	218.214	268.64	-0.3263	3.5851e-05	0.00028556	Rpusd2	chr2	+	119034790	119039769	2706	protein_coding	RNA_pseudouridylate_synthase_domain_containing_2	191	207	189	199	170	205	211	242	208	261	179	258	182	269	3.51113	3.1207	2.81332	3.47122	3.57374	3.37885	2.98234	3.67016	3.69165	4.18175
ENSMUSG00000040429	74.2288	86.378	75.7711	70.5146	74.9416	92.5598	90.7764	104.718	88.1831	112.521	100.574	107.281	109.107	102.862	-0.32553	0.0012196	0.0062936	Mterf1a	chr5	-	3890581	3893933	2413	protein_coding	mitochondrial_transcription_termination_factor_1a	71	100	89	70	62	97	114	114	80	115	86	112	91	103	1.46367	1.69064	1.48565	1.3693	1.46162	1.79291	1.80696	1.93885	1.59227	2.06627
ENSMUSG00000049488	406.69	399.93	472.505	523.823	507.669	457.074	465.03	590.648	595.236	599.785	571.869	608.245	565.918	538.278	-0.32533	6.3782e-08	8.4527e-07	Tmem67	chr4	-	12039355	12090020	3945	protein_coding	transmembrane_protein_67	389	463	555	520	420	479	584	643	540	613	489	635	472	539	4.90506	4.78788	5.6667	6.22176	6.05625	5.41542	5.66197	6.689	6.57402	6.73689
ENSMUSG00000075273	665.968	601.191	571.263	544.977	592.28	612.613	539.084	759.666	699.953	782.754	739.103	821.849	663.035	722.032	-0.32497	9.7805e-09	1.4482e-07	Ttc30b	chr2	-	75935849	75938585	2737	protein_coding	tetratricopeptide_repeat_domain_30B	637	696	671	541	490	642	677	827	635	800	632	858	553	723	11.5773	10.3739	9.87489	9.32995	10.1841	10.4617	9.46054	12.4002	11.1425	12.6725
ENSMUSG00000079083	595.921	674.613	604.466	679.962	535.47	624.063	693.563	884.593	849.864	716.22	758.984	787.365	786.529	781.952	-0.32466	6.0267e-08	8.0324e-07	Jrkl	chr9	-	13242790	13245741	2952	protein_coding	Jrk-like	570	781	710	675	443	654	871	963	771	732	649	822	656	783	9.60506	10.793	9.68783	10.793	8.53667	9.88109	11.2851	13.3877	12.5436	10.7508
ENSMUSG00000047446	725.56	727.303	717.697	728.315	696.232	719.486	743.729	947.057	922.615	926.585	837.339	820.891	981.963	924.76	-0.32421	8.2639e-13	2.0237e-11	Arl4a	chr12	-	40005447	40038025	3936	protein_coding	ADP-ribosylation_factor-like_4A	694	842	843	723	576	754	934	1031	837	947	716	857	819	926	8.77094	8.72702	8.62694	8.67041	8.3247	8.54397	9.07599	10.7498	10.213	10.4314
ENSMUSG00000033319	1993.72	2160.31	1783.6	1903.89	1768.38	1925.63	2112.54	2500.38	2789.89	2183.88	2341.27	2443.51	2394.36	2531.61	-0.32416	2.0583e-09	3.3887e-08	Fem1c	chr18	-	46501746	46525971	5726	protein_coding	fem-1_homolog_c_(C.elegans)	1907	2501	2095	1890	1463	2018	2653	2722	2531	2232	2002	2551	1997	2535	16.5669	17.8185	14.7373	15.58	14.5343	15.7186	17.721	19.5089	21.2288	16.9001
ENSMUSG00000063235	128.594	119.202	143.88	134.985	160.762	157.447	158.461	164.426	184.082	175.141	192.962	199.236	184.643	172.768	-0.32383	0.00012259	0.00084713	Ptpmt1	chr2	-	90908716	90918258	3183	processed_transcript	protein_tyrosine_phosphatase_mitochondrial_1	123	138	169	134	133	165	199	179	167	179	165	208	154	173	1.92225	1.76869	2.13862	1.98712	2.37693	2.31201	2.39121	2.30788	2.51979	2.43816
ENSMUSG00000021254	997.384	981.255	1057.39	1005.34	1173.68	1029.61	1005.71	1239.17	1382.27	1278.82	1342.55	1191.58	1281.71	1387.14	-0.32377	6.1199e-12	1.3663e-10	Gpatch2l	chr12	+	86241890	86291414	3953	protein_coding	G_patch_domain_containing_2_like	954	1136	1242	998	971	1079	1263	1349	1254	1307	1148	1244	1069	1389	12.005	11.7236	12.6555	11.9168	13.9731	12.1741	12.2202	14.005	15.2354	14.3349
ENSMUSG00000025584	1001.57	1054.68	973.106	1003.32	975.45	972.355	1098.08	1345.72	1438.49	1232.84	1206.89	1304.61	1215.76	1157.45	-0.32362	6.7103e-11	1.3325e-09	Pde8a	chr7	+	81213596	81334533	3802	protein_coding	phosphodiesterase_8A	958	1221	1143	996	807	1019	1379	1465	1305	1260	1032	1362	1014	1159	12.5342	13.1012	12.1093	12.3653	12.0743	11.9538	13.8725	15.8133	16.4848	14.3683
ENSMUSG00000026274	231.05	210.762	230.719	269.97	239.33	264.32	250.829	338.956	364.857	292.554	230.385	315.138	315.331	291.609	-0.32354	0.00010438	0.00074191	Pask	chr1	-	93308770	93343482	5779	protein_coding	PAS_domain_containing_serine/threonine_kinase	221	244	271	268	198	277	315	369	331	299	197	329	263	292	1.90231	1.72245	1.88887	2.18896	1.94901	2.13782	2.08478	2.62042	2.7508	2.24318
ENSMUSG00000049090	765.288	698.798	731.319	717.234	731.285	669.866	756.47	913.988	956.786	941.262	863.067	842.922	896.835	948.728	-0.32308	6.1085e-13	1.5219e-11	Zadh2	chr18	+	84088158	84097514	3321	protein_coding	zinc_binding_alcohol_dehydrogenase_domain_containing_2	732	809	859	712	605	702	950	995	868	962	738	880	748	950	10.9644	9.93776	10.4186	10.1197	10.3631	9.42783	10.941	12.2956	12.5526	12.5589
ENSMUSG00000057265	174.594	154.617	158.353	161.176	154.718	148.859	144.924	222.297	229.276	176.12	195.301	182.952	173.852	206.723	-0.32281	7.915e-05	0.00058068	Ccdc176	chr12	+	84409071	84433780	2187	protein_coding	coiled-coil_domain_containing_176	167	179	186	160	128	156	182	242	208	180	167	191	145	207	3.79848	3.33897	3.4257	3.45325	3.32937	3.18141	3.18291	4.54113	4.56772	3.56837
ENSMUSG00000029167	1213.8	1360.45	1273.64	1251.13	1237.75	1179.42	1320.24	1603.84	1641.31	1549.85	1626.73	1600.59	1459.16	1606.85	-0.32256	3.7577e-16	1.2226e-14	Ppargc1a	chr5	-	51454249	51567725	6464	protein_coding	peroxisome_proliferative_activated_receptor_gamma_coactivator_1_alpha	1161	1575	1496	1242	1024	1236	1658	1746	1489	1584	1391	1671	1217	1609	8.93455	9.94004	9.32212	9.06936	9.01156	8.52826	9.81037	11.0851	11.0631	10.6243
ENSMUSG00000024869	130.684	121.793	154.948	148.081	146.257	157.447	146.516	200.251	201.719	143.831	167.234	198.278	177.449	186.75	-0.32236	0.00026931	0.0016875	Nudt8	chr19	+	4000580	4005816	3904	protein_coding	nudix_(nucleoside_diphosphate_linked_moiety_X)-type_motif_8	125	141	182	147	121	165	184	218	183	147	143	207	148	187	1.59273	1.47339	1.87779	1.77731	1.7631	1.88503	1.80264	2.29163	2.25126	1.6325
ENSMUSG00000036768	200.731	207.307	162.61	213.558	176.475	195.616	205.441	258.121	319.664	201.559	185.945	256.708	255.382	256.656	-0.32209	0.00079561	0.0043649	Kif15	chr9	+	122951081	123018725	4815	protein_coding	kinesin_family_member_15	192	240	191	212	146	205	258	281	290	206	159	268	213	257	1.98357	2.0334	1.5978	2.07824	1.72488	1.89889	2.04939	2.39501	2.89259	1.85488
ENSMUSG00000078877	240.459	237.54	217.948	253.853	226.034	218.518	208.626	307.725	272.265	304.296	260.791	276.823	282.959	307.588	-0.32134	2.1306e-06	2.1803e-05	Gm14295	chr2	+	176798612	176811223	2505	protein_coding	predicted_gene_14295	230	275	256	252	187	229	262	335	247	311	223	289	236	308	4.56732	4.47851	4.11639	4.74842	4.24654	4.07729	4.00033	5.48825	4.73559	5.38268
ENSMUSG00000086264	417.145	386.11	348.207	407.977	319.106	411.271	506.437	591.566	498.234	378.657	492.346	505.753	496.377	593.205	-0.32133	0.00049307	0.0028828	Gm15850	chr1	-	136126178	136131183	2049	antisense	predicted_gene_15850	399	447	409	405	264	431	636	644	452	387	421	528	414	594	9.68663	8.89968	8.04018	9.32974	7.32931	9.38164	11.8718	12.8986	10.5945	8.1887
ENSMUSG00000097924	115.002	126.112	80.0279	80.5881	106.369	83.9718	105.109	167.182	157.627	105.672	140.336	109.197	86.3264	135.818	-0.32119	0.011296	0.040639	A730020E08Rik	chr6	-	61175613	61180810	1757	lincRNA	RIKEN_cDNA_A730020E08_gene	110	146	94	80	88	88	132	182	143	108	120	114	72	136	3.11432	3.38992	2.15497	2.14919	2.84913	2.23385	2.87345	4.25105	3.90885	2.665
ENSMUSG00000003573	387.872	372.289	458.032	432.154	437.562	415.088	448.308	556.66	520.28	520.531	516.904	534.489	523.953	532.286	-0.32107	3.2411e-09	5.1763e-08	Homer3	chr8	+	70282827	70294361	2608	protein_coding	homer_homolog_3_(Drosophila)	371	431	538	429	362	435	563	606	472	532	442	558	437	533	7.07633	6.74184	8.3092	7.76437	7.89591	7.43918	8.25663	9.53591	8.69198	8.84402
ENSMUSG00000038593	521.692	469.033	448.667	485.543	427.892	494.289	497.677	687.099	672.396	566.518	533.277	567.056	575.509	604.19	-0.32071	3.1092e-07	3.7171e-06	Tctn1	chr5	-	122241287	122264460	2790	protein_coding	tectonic_family_member_1	499	543	527	482	354	518	625	748	610	579	456	592	480	605	8.89689	7.93971	7.60836	8.15454	7.21773	8.28074	8.56797	11.0026	10.5005	8.99746
ENSMUSG00000026708	66.9105	82.0591	74.0684	73.5366	101.534	63.9331	63.7027	100.125	102.513	90.0167	85.3711	92.9129	80.3315	117.842	-0.3207	0.0046863	0.019669	Cenpl	chr1	+	161070767	161086724	4447	protein_coding	centromere_protein_L	64	95	87	73	84	67	80	109	93	92	73	97	67	118	0.715904	0.871496	0.788019	0.774841	1.07452	0.671972	0.688058	1.0059	1.00439	0.896946
ENSMUSG00000097207	63.774	50.963	70.663	66.4852	51.9756	61.0704	74.8507	76.2422	50.7053	89.0383	87.71	100.576	76.7346	88.8808	-0.32053	0.010492	0.038269	6030443J06Rik	chr5	+	22550437	22807850	4299	lincRNA	RIKEN_cDNA_6030443J06_gene	61	59	83	66	43	64	94	83	46	91	75	105	64	89	0.705837	0.559878	0.77767	0.724658	0.568987	0.663981	0.836301	0.792333	0.513896	0.91774
ENSMUSG00000056735	205.959	235.812	247.746	212.551	188.563	217.563	263.57	315.073	250.219	255.373	277.164	268.202	306.938	322.568	-0.32034	8.1924e-05	0.00059868	A930024E05Rik	chr5	+	122989354	122998345	1896	processed_transcript	RIKEN_cDNA_A930024E05_gene	197	273	291	211	156	228	331	343	227	261	237	280	256	323	5.16856	5.87399	6.18215	5.25292	4.68045	5.3634	6.67716	7.42425	5.75005	5.96826
ENSMUSG00000053062	3652.89	3742.76	3511.01	3648.63	3489.62	3635.6	3449.5	4391.74	4759.68	4523.34	4348.08	4639.9	4493.77	4259.29	-0.31966	1.3198e-24	7.406e-23	Jam2	chr16	+	84774123	84825928	4370	protein_coding	junction_adhesion_molecule_2	3494	4333	4124	3622	2887	3810	4332	4781	4318	4623	3718	4844	3748	4265	39.7725	40.4498	38.0121	39.1222	37.5809	38.8854	37.9148	44.8988	47.4554	45.8657
ENSMUSG00000021013	2287.5	2389.22	2219.5	2260.5	2116.5	2297.77	2235.17	2941.3	2998.22	2597.76	2699.13	2683.94	2806.81	3061.89	-0.3196	7.1883e-15	2.1526e-13	Ttc8	chr12	+	98920574	98983238	2272	protein_coding	tetratricopeptide_repeat_domain_8	2188	2766	2607	2244	1751	2408	2807	3202	2720	2655	2308	2802	2341	3066	47.905	49.6653	46.2186	46.6199	43.8409	47.2706	47.2537	57.8376	57.497	50.6643
ENSMUSG00000093865	1542.08	1654.14	1642.28	1724.59	1732.12	1858.83	1727.14	2184.39	2343.47	1960.8	2144.8	2057.49	2173.75	2018.29	-0.31941	1.9149e-12	4.5409e-11	Lrit3	chr3	-	129787881	129804030	2456	protein_coding	leucine-rich_repeat_immunoglobulin-like_and_transmembrane_domains_3	1475	1915	1929	1712	1433	1948	2169	2378	2126	2004	1834	2148	1813	2021	29.8748	31.8089	31.6365	32.9027	33.1909	35.3756	33.7779	39.7357	41.5738	35.3765
ENSMUSG00000043251	296.915	264.317	318.409	302.205	333.611	255.732	298.606	399.583	348.323	348.326	371.891	370.694	342.908	414.444	-0.31907	2.9241e-06	2.9188e-05	Exoc3l	chr8	-	105289924	105296098	2497	protein_coding	exocyst_complex_component_3-like	284	306	374	300	276	268	375	435	316	356	318	387	286	415	5.65772	4.99933	6.03306	5.671	6.2877	4.78696	5.744	7.14937	6.07789	6.18126
ENSMUSG00000053716	1800.31	1921.91	1586.94	1839.42	2023.42	1767.23	2083.08	2438.83	2373.23	2149.64	2305.02	2412.86	2197.73	2438.73	-0.31883	1.532e-09	2.5605e-08	Dusp7	chr9	+	106368632	106375724	3213	protein_coding	dual_specificity_phosphatase_7	1722	2225	1864	1826	1674	1852	2616	2655	2153	2197	1971	2519	1833	2442	26.6602	28.2506	23.3679	26.8254	29.6378	25.7083	31.1407	33.9118	32.1824	29.6459
ENSMUSG00000004931	691.06	674.613	770.482	718.241	772.382	667.958	643.397	998.498	919.309	851.245	877.1	891.773	866.861	779.954	-0.31873	1.6092e-08	2.3202e-07	Apba3	chr10	+	81268172	81273246	2106	protein_coding	amyloid_beta_(A4)_precursor_protein-binding_family_A_member_3	661	781	905	713	639	700	808	1087	834	870	750	931	723	781	15.6129	15.1287	17.3091	15.9804	17.2601	14.8246	14.6742	21.1821	19.0192	17.9105
ENSMUSG00000045822	238.369	254.815	232.422	250.83	297.349	268.137	255.607	303.132	271.163	282.77	360.196	346.747	338.112	360.517	-0.31864	2.8978e-05	0.00023563	Zswim3	chr2	+	164805098	164822130	2708	protein_coding	zinc_finger_SWIM-type_containing_3	228	295	273	249	246	281	321	330	246	289	308	362	282	361	4.18821	4.44408	4.06068	4.34018	5.16759	4.62808	4.53376	5.00106	4.36286	4.62695
ENSMUSG00000021671	1045.48	1161.78	992.687	1121.18	1205.11	1090.68	1033.58	1376.95	1407.62	1434.4	1334.36	1343.89	1310.48	1349.19	-0.3185	5.6129e-13	1.4022e-11	Poc5	chr13	+	96388294	96415587	3033	protein_coding	POC5_centriolar_protein_homolog_(Chlamydomonas)	1000	1345	1166	1113	997	1143	1298	1499	1277	1466	1141	1403	1093	1351	16.401	18.0908	15.485	17.3213	18.6992	16.808	16.3683	20.2827	20.221	20.9559
ENSMUSG00000060149	245.687	272.091	183.894	238.742	200.65	249.053	201.46	292.109	315.254	261.244	272.486	280.655	297.346	290.61	-0.31847	8.9015e-05	0.00064395	BC002059	chr17	+	16951539	16974157	1964	lincRNA	cDNA_sequence_BC002059	235	315	216	237	166	261	253	318	286	267	233	293	248	291	5.95207	6.54302	4.42993	5.69591	4.80804	5.9271	4.92698	6.64481	6.99373	5.89407
ENSMUSG00000034274	2407.73	2482.51	2072.21	2218.19	2221.66	2319.72	2310.02	3302.3	3221.99	2451	2879.23	2682.98	2730.07	2830.21	-0.31748	5.0643e-08	6.8474e-07	Thoc5	chr11	+	4895320	4928867	2235	protein_coding	THO_complex_5	2303	2874	2434	2202	1838	2431	2901	3595	2923	2505	2462	2801	2277	2834	51.2576	52.4588	43.866	46.5047	46.781	48.5122	49.6446	66.0113	62.811	48.5932
ENSMUSG00000039715	561.421	577.005	612.129	601.389	588.654	622.155	586.861	740.376	674.601	789.603	733.256	771.082	752.958	726.027	-0.3174	4.2482e-12	9.7044e-11	Wdr34	chr2	-	30031546	30048881	1814	protein_coding	WD_repeat_domain_34	537	668	719	597	487	652	737	806	612	807	627	805	628	727	14.7258	15.0227	15.9653	15.5344	15.2719	16.0307	15.5393	18.2345	16.2031	19.2878
ENSMUSG00000032911	55.4102	39.7339	54.4871	54.397	50.7669	61.0704	70.073	57.8706	80.4671	63.5988	86.5406	68.0084	77.9336	66.9103	-0.31661	0.011002	0.039817	Cspg4	chr9	+	56865104	56899870	8050	protein_coding	chondroitin_sulfate_proteoglycan_4	53	46	64	54	42	64	88	63	73	65	74	71	65	67	0.327508	0.233115	0.320235	0.316632	0.296794	0.354591	0.418108	0.321175	0.435523	0.350077
ENSMUSG00000097328	806.062	830.957	830.077	853.227	927.1	940.866	801.858	1180.38	967.809	1048.89	929.726	1217.45	1061.1	1084.55	-0.31603	1.128e-07	1.4457e-06	Tnfsf12	chr11	-	69686250	69695849	1435	protein_coding	tumor_necrosis_factor_(ligand)_superfamily_member_12	771	962	975	847	767	986	1007	1285	878	1072	795	1271	885	1086	26.7266	27.3484	27.3676	27.8605	30.405	30.6456	26.8398	36.7492	29.3851	32.3883
ENSMUSG00000029047	393.099	368.834	422.275	423.088	402.509	378.827	432.382	592.485	485.007	498.027	481.82	508.627	467.601	495.336	-0.31569	1.6987e-07	2.1289e-06	Pex10	chr4	+	155067016	155072433	2790	protein_coding	peroxisomal_biogenesis_factor_10	376	427	496	420	333	397	543	645	440	509	412	531	390	496	6.70387	6.24356	7.16081	7.10562	6.78956	6.34643	7.44385	9.48752	7.57413	7.90969
ENSMUSG00000041193	2455.82	2361.58	2682.64	2452.9	2701.52	2561.14	2237.56	3212.28	2904.53	3260.17	3184.46	2916.7	3134.13	3168.75	-0.3156	9.8063e-13	2.389e-11	Pla2g5	chr4	-	138799244	138863482	2289	protein_coding	phospholipase_A2_group_V	2349	2734	3151	2435	2235	2684	2810	3497	2635	3332	2723	3045	2614	3173	51.048	48.7261	55.4482	50.2123	55.5435	52.2974	46.9529	62.697	55.2865	63.111
ENSMUSG00000086429	294.824	315.28	335.436	341.492	298.558	316.803	340.013	471.232	373.676	397.248	335.637	379.315	420.841	437.414	-0.31554	6.4571e-06	6.0571e-05	Gt(ROSA)26Sor	chr6	-	113067428	113077333	1181	antisense	gene_trap_ROSA_26_Philippe_Soriano	282	365	394	339	247	332	427	513	339	406	287	396	351	438	11.8779	12.6082	13.4379	13.549	11.8973	12.5381	13.8287	17.8264	13.7859	14.9047
ENSMUSG00000099515	1234.71	1294.81	1220.85	1211.84	1091.49	1120.26	1344.13	1438.5	1694.22	1404.06	1513.29	1589.1	1478.34	1544.93	-0.31541	8.2894e-10	1.4476e-08	POU2F1	chr1	-	165865154	165934948	13050	protein_coding	-	1181	1499	1434	1203	903	1174	1688	1566	1537	1435	1294	1659	1233	1547	4.50175	4.68598	4.42612	4.35123	3.93621	4.01237	4.94725	4.92468	5.6565	4.76746
ENSMUSG00000021932	194.459	176.211	187.299	196.434	184.937	186.074	165.627	221.378	202.821	262.223	238.571	240.424	245.79	207.722	-0.31438	3.0083e-05	0.00024366	Rnaseh2b	chr14	+	62292589	62372992	4983	protein_coding	ribonuclease_H2_subunit_B	186	204	220	195	153	195	208	241	184	268	204	251	205	208	1.85679	1.67012	1.77835	1.84714	1.74663	1.74537	1.59652	1.98483	1.77342	2.33179
ENSMUSG00000031200	259.278	249.633	256.26	240.757	198.233	255.732	278.699	303.132	406.744	270.05	267.808	336.211	284.158	329.558	-0.3139	0.0003507	0.0021353	Mtcp1	chrX	-	75410444	75416588	3071	protein_coding	mature_T_cell_proliferation_1	248	289	301	239	164	268	350	330	369	276	229	351	237	330	4.01711	3.83908	3.94795	3.67345	3.03784	3.89223	4.35903	4.40992	5.77073	3.8965
ENSMUSG00000029144	770.516	735.077	723.657	711.19	663.596	719.486	778.766	906.639	992.06	817.978	837.339	1005.76	987.958	836.878	-0.31369	2.7022e-08	3.7907e-07	Gtf3c2	chr5	-	31156005	31180144	4718	protein_coding	general_transcription_factor_IIIC_polypeptide_2_beta	737	851	850	706	549	754	978	987	900	836	716	1050	824	838	7.77054	7.35835	7.25681	7.06323	6.61936	7.12782	7.92835	8.58531	9.16155	7.68235
ENSMUSG00000022855	2499.73	2493.73	2397.43	2553.64	2593.95	2408.46	2513.87	3213.2	3365.29	2927.5	2948.23	3085.28	3134.13	3062.89	-0.31359	2.5157e-19	1.0242e-17	Senp2	chr16	+	22009484	22049269	4499	protein_coding	SUMO/sentrin_specific_peptidase_2	2391	2887	2816	2535	2146	2524	3157	3498	3053	2992	2521	3221	2614	3067	26.4366	26.1782	25.2116	26.5961	27.1341	25.0217	26.8386	31.9081	32.5908	28.8331
ENSMUSG00000040321	821.744	881.056	783.252	830.057	788.096	872.162	834.506	1077.5	1147.48	997.033	997.556	1113.04	929.208	989.673	-0.31358	3.5302e-10	6.48e-09	Zfp770	chr2	-	114193461	114201469	4300	protein_coding	zinc_finger_protein_770	786	1020	920	824	652	914	1048	1173	1041	1019	853	1162	775	991	9.09276	9.677	8.61795	9.04514	8.62542	9.48028	9.32169	11.1951	11.627	10.2743
ENSMUSG00000061666	711.969	702.254	789.212	627.58	755.46	754.792	724.618	893.779	801.364	927.563	877.1	944.455	948.391	931.751	-0.31348	1.9949e-09	3.2931e-08	Gdpd1	chr11	-	87033867	87074062	2336	protein_coding	glycerophosphodiester_phosphodiesterase_domain_containing_1	681	813	927	623	625	791	910	973	727	948	750	986	791	933	14.5016	14.198	15.9842	12.5884	15.2198	15.1024	14.8995	17.0937	14.9467	17.5947
ENSMUSG00000051034	248.823	220.264	189.002	220.61	189.771	221.38	216.589	276.493	286.595	220.15	247.927	296.938	266.173	297.601	-0.31293	7.6824e-05	0.00056494	Zfp11	chr5	-	129654593	129670099	3929	protein_coding	zinc_finger_protein_11	238	255	222	219	157	232	272	301	260	225	212	310	222	298	3.01326	2.64769	2.27591	2.63099	2.2731	2.6336	2.64782	3.14399	3.17816	2.48283
ENSMUSG00000035615	5308.93	5224.14	4538.61	5007.54	4780.55	4633.72	5134.44	6746.06	6785.69	5816.84	5673.09	6175.36	5570.45	6429.38	-0.31288	6.2716e-10	1.1182e-08	Frmpd1	chr4	+	45184875	45285936	5241	protein_coding	FERM_and_PDZ_domain_containing_1	5078	6048	5331	4971	3955	4856	6448	7344	6156	5945	4851	6447	4646	6438	48.197	47.0768	40.9712	44.7699	42.9273	41.3245	47.0558	57.5063	56.4117	49.1794
ENSMUSG00000041794	1775.22	1705.1	1890.87	1930.09	1979.91	1799.67	1775.71	2373.61	2313.7	2289.56	2233.68	2379.34	2167.75	2226.02	-0.31244	2.4612e-16	8.1112e-15	Myrip	chr9	+	120303936	120474841	4906	protein_coding	myosin_VIIA_and_Rab_interacting_protein	1698	1974	2221	1916	1638	1886	2230	2584	2099	2340	1910	2484	1808	2229	17.2168	16.4145	18.235	18.4342	18.9927	17.1458	17.3852	21.6153	20.548	20.6792
ENSMUSG00000024236	1087.29	1084.04	1037.81	1221.92	1095.11	1169.88	1229.46	1399.92	1560.84	1280.78	1340.21	1500.02	1374.03	1428.09	-0.31201	7.8181e-10	1.3743e-08	Svil	chr18	+	4920540	5119299	7907	protein_coding	supervillin	1040	1255	1219	1213	906	1226	1544	1524	1416	1309	1146	1566	1146	1430	6.5428	6.47502	6.20978	7.24112	6.51805	6.91548	7.46857	7.90989	8.60074	7.17751
ENSMUSG00000043065	503.919	555.411	554.236	534.904	519.756	564.901	561.38	716.493	673.498	645.772	653.732	687.747	629.463	724.029	-0.31184	1.1047e-10	2.1237e-09	Spice1	chr16	+	44347121	44388497	4627	protein_coding	spindle_and_centriole_associated_protein_1	482	643	651	531	430	592	705	780	611	660	559	718	525	725	5.1819	5.66918	5.66717	5.41691	5.28653	5.70644	5.82763	6.91818	6.342	6.18429
ENSMUSG00000046994	895.973	893.149	694.711	832.072	772.382	729.028	923.689	1166.6	1124.33	1020.52	842.016	1041.2	984.361	1006.65	-0.31129	1.2436e-05	0.00010943	Mars2	chr1	+	55237177	55248470	11294	protein_coding	methionine-tRNA_synthetase_2_(mitochondrial)	857	1034	816	826	639	764	1160	1270	1020	1043	720	1087	821	1008	3.77463	3.73492	2.91023	3.45214	3.21851	3.01709	3.92837	4.6148	4.33747	4.00389
ENSMUSG00000030283	4740.19	4647.14	4600.76	5055.9	4352.66	4867.5	4715.59	5626.31	6536.57	5789.44	5730.39	5696.43	5635.2	6008.94	-0.31091	2.4274e-15	7.4971e-14	St8sia1	chr6	-	142821545	142964452	8991	protein_coding	ST8_alpha-N-acetyl-neuraminide_alpha-28-sialyltransferase_1	4534	5380	5404	5019	3601	5101	5922	6125	5930	5917	4900	5947	4700	6017	25.0851	24.4109	24.2098	26.3491	22.7833	25.3041	25.192	27.9573	31.6761	28.5325
ENSMUSG00000084910	132.775	104.517	127.704	126.926	135.378	125.958	140.942	157.077	163.139	180.033	161.386	158.048	122.296	180.758	-0.3109	0.00066781	0.0037428	C630043F03Rik	chr4	+	72201348	72215352	2581	processed_transcript	RIKEN_cDNA_C630043F03_gene	127	121	150	126	112	132	177	171	148	184	138	165	102	181	2.4477	1.91252	2.34093	2.3043	2.46849	2.28102	2.62293	2.71897	2.75396	3.09083
ENSMUSG00000092349	3055.93	3088.02	3076.82	3074.44	3302.27	3273.95	2641.27	4053.7	3626.53	4033.14	3717.74	3849.66	3557.37	3910.76	-0.31027	1.9315e-11	4.1153e-10	BC033916	chr17	+	33905135	33906675	807	lincRNA	cDNA_sequence_BC033916	2923	3575	3614	3052	2732	3431	3317	4413	3290	4122	3179	4019	2967	3916	180.176	180.722	180.384	178.512	192.579	189.623	157.208	224.418	195.797	221.452
ENSMUSG00000036158	1127.02	1102.18	1199.57	1233	1136.21	1072.55	1063.04	1532.19	1516.75	1412.87	1346.06	1407.1	1298.49	1349.19	-0.31002	4.4193e-11	8.9372e-10	Prickle1	chr15	-	93499114	93595891	4144	protein_coding	prickle_homolog_1_(Drosophila)	1078	1276	1409	1224	940	1124	1335	1668	1376	1444	1151	1469	1083	1351	12.9402	12.5615	13.6954	13.9418	12.9036	12.0973	12.3215	16.5186	15.9472	15.1075
ENSMUSG00000070733	9238.87	9328.83	9032.94	10024.2	9083.65	9822.79	10191.6	11173.6	12197.9	11148.4	12501.6	12873.7	11795.5	11259.9	-0.30987	3.2697e-14	9.1875e-13	Fryl	chr5	-	73020322	73256618	11339	protein_coding	furry_homolog-like_(Drosophila)	8837	10800	10610	9951	7515	10294	12799	12164	11066	11394	10690	13440	9838	11275	38.7679	38.856	37.6899	41.4237	37.7012	40.4905	43.1721	44.0249	46.8706	43.566
ENSMUSG00000039632	101.411	80.3316	99.6092	78.5734	94.2814	86.8345	79.6284	113.904	103.615	119.37	119.286	101.534	115.102	108.854	-0.30967	0.0014591	0.0073511	Ccdc151	chr9	-	21989871	22002634	2200	protein_coding	coiled-coil_domain_containing_151	97	93	117	78	78	91	100	124	94	122	102	106	96	109	2.19326	1.72452	2.14214	1.67351	2.01685	1.84485	1.73852	2.31311	2.05206	2.40427
ENSMUSG00000029007	1215.89	1133.28	1239.58	1160.47	1201.48	1280.57	1158.59	1477.08	1389.99	1539.09	1415.06	1539.29	1513.11	1541.93	-0.30947	3.7952e-15	1.1588e-13	Agtrap	chr4	-	148077061	148088031	3996	protein_coding	angiotensin_II_type_I_receptor-associated_protein	1163	1312	1456	1152	994	1342	1455	1608	1261	1573	1210	1607	1262	1544	14.4776	13.3942	14.6764	13.6077	14.1502	14.9786	13.9264	16.5142	15.1556	17.0667
ENSMUSG00000026383	2282.27	2178.45	2072.21	2088.24	2144.3	2105.02	2293.3	2704.3	2959.64	2646.69	2602.06	2640.83	2704.89	2581.54	-0.30943	1.1919e-16	4.0274e-15	Epb4.1l5	chr1	-	119545037	119649000	6870	protein_coding	erythrocyte_protein_band_4.1-like_5	2183	2522	2434	2073	1774	2206	2880	2944	2685	2705	2225	2757	2256	2585	15.8066	14.976	14.2708	14.2429	14.6892	14.3216	16.0338	17.5864	18.7703	17.0709
ENSMUSG00000044700	2358.59	2182.77	2546.42	2553.64	2348.57	2317.81	2607.03	3075.41	3241.83	2960.77	2929.52	3224.17	2825.99	2778.28	-0.30917	3.7428e-11	7.6351e-10	Tmem201	chr4	-	149715375	149738044	4631	protein_coding	transmembrane_protein_201	2256	2527	2991	2535	1943	2429	3274	3348	2941	3026	2505	3366	2357	2782	24.2329	22.2607	26.0151	25.8381	23.8671	23.3935	27.04	29.6693	30.5003	28.3296
ENSMUSG00000070814	472.555	437.073	468.249	431.146	403.718	466.616	415.66	538.288	523.587	535.208	559.005	588.129	592.295	521.301	-0.30902	8.7566e-09	1.3048e-07	6330408A02Rik	chr7	-	13258967	13278721	4282	protein_coding	RIKEN_cDNA_6330408A02_gene	452	506	550	428	334	489	522	586	475	547	478	614	494	522	5.2509	4.82073	5.17369	4.71795	4.43712	5.09337	4.66258	5.61627	5.3276	5.53843
ENSMUSG00000087694	772.607	766.173	699.819	772.638	630.96	708.989	852.82	874.489	1101.19	842.439	923.879	1023.96	882.448	858.849	-0.30896	4.8085e-06	4.6101e-05	A530058N18Rik	chr2	+	114013602	114032292	3854	processed_transcript	RIKEN_cDNA_A530058N18_gene	739	887	822	767	522	743	1071	952	999	861	790	1069	736	860	9.53838	9.38903	8.59102	9.39378	7.70478	8.59846	10.6287	10.1373	12.4491	9.68584
ENSMUSG00000031266	468.373	425.844	452.924	426.11	483.494	495.243	410.883	528.184	572.088	567.497	584.734	537.362	568.315	573.231	-0.30883	6.9109e-09	1.0465e-07	Gla	chrX	-	134588149	134601125	3172	protein_coding	galactosidase_alpha	448	493	532	423	400	519	516	575	519	580	500	561	474	574	7.02565	6.34049	6.75559	6.29454	7.17345	7.29756	6.22184	7.43929	7.85812	7.92758
ENSMUSG00000085084	332.461	368.834	240.935	281.051	242.956	285.313	347.976	388.56	446.427	346.369	315.756	363.031	395.663	389.478	-0.30806	0.00077785	0.00428	4930570G19Rik	chr3	-	156546753	156561746	3112	processed_transcript	RIKEN_cDNA_4930570G19_gene	318	427	283	279	201	299	437	423	405	354	270	379	330	390	5.08311	5.59754	3.66295	4.23176	3.67416	4.28524	5.37086	5.57825	6.25029	4.93184
ENSMUSG00000040771	524.829	583.052	575.52	545.984	599.533	646.965	613.935	780.794	719.794	677.082	695.833	696.368	758.953	760.98	-0.30805	5.3933e-09	8.3151e-08	Oard1	chr17	+	48410014	48417266	1324	protein_coding	O-acyl-ADP-ribose_deacylase_1	502	675	676	542	496	678	771	850	653	692	595	727	633	762	18.8607	20.7981	20.5657	19.3227	21.3106	22.8394	22.2725	26.3468	23.687	22.6602
ENSMUSG00000050315	974.384	923.381	981.619	1088.95	1022.59	957.088	985.8	1226.31	1423.05	1089.01	1227.94	1280.67	1141.43	1230.35	-0.30764	8.2554e-09	1.2361e-07	Synpo2	chr3	-	123076519	123236149	7114	protein_coding	synaptopodin_2	932	1069	1153	1081	846	1003	1238	1335	1291	1113	1050	1337	952	1232	6.51694	6.13017	6.5283	7.17247	6.76485	6.28826	6.65593	7.70131	8.71559	6.78308
ENSMUSG00000031286	205.959	235.812	240.935	267.955	165.597	265.275	251.626	306.806	342.812	287.662	301.723	286.402	273.367	258.653	-0.30754	0.00042852	0.0025485	Glt28d2	chr3	-	85801047	85887518	2732	protein_coding	glycosyltransferase_28_domain_containing_2	197	273	283	266	137	278	316	334	311	294	258	299	228	259	3.58697	4.07653	4.17244	4.59576	2.8526	4.53845	4.42393	5.01722	5.46719	4.66565
ENSMUSG00000024660	433.872	394.748	422.275	363.654	385.587	474.25	433.975	491.441	489.416	497.049	571.869	546.941	533.545	499.331	-0.30745	4.8121e-07	5.5608e-06	Incenp	chr19	-	9872297	9899533	3217	protein_coding	inner_centromere_protein	415	457	496	361	319	497	545	535	444	508	489	571	445	500	6.4171	5.79527	6.21034	5.29679	5.6408	6.89047	6.47959	6.82495	6.62852	6.84634
ENSMUSG00000097047	73.1833	63.9198	61.298	80.5881	58.0193	67.75	59.7213	98.2882	89.2854	69.4694	87.71	102.492	63.5458	77.8956	-0.30718	0.0089969	0.033718	1110020A21Rik	chr17	-	84954967	84957710	853	lincRNA	RIKEN_cDNA_1110020A21_gene	70	74	72	80	48	71	75	107	81	71	75	107	53	78	4.08217	3.53909	3.39991	4.42688	3.20106	3.71238	3.3629	5.14792	4.56058	3.60874
ENSMUSG00000036572	2364.87	2108.49	1970.9	2161.78	1895.3	2109.79	2116.52	2960.59	2972.87	2319.89	2363.49	2651.37	2526.25	2532.6	-0.30712	1.7401e-07	2.1764e-06	Upf3b	chrX	-	37091678	37110322	2553	protein_coding	UPF3_regulator_of_nonsense_transcripts_homolog_B_(yeast)	2262	2441	2315	2146	1568	2211	2658	3223	2697	2371	2021	2768	2107	2536	44.0741	39.0055	36.5245	39.6767	34.9379	38.6261	39.8205	51.8092	50.7358	40.2649
ENSMUSG00000038370	1327.75	1471.02	1413.26	1327.69	1461.36	1407.48	1361.65	1734.28	1525.57	1773.92	1779.93	1801.74	1845.23	1662.77	-0.30682	1.6225e-12	3.872e-11	Pcp4l1	chr1	-	171173262	171196268	1577	protein_coding	Purkinje_cell_protein_4-like_1	1270	1703	1660	1318	1209	1475	1710	1888	1384	1813	1522	1881	1539	1665	40.0603	44.0547	42.3995	39.4494	43.611	41.7161	41.4731	49.1323	42.1492	49.8439
ENSMUSG00000026049	72.1378	105.381	69.8116	77.5661	108.786	96.3767	82.8135	126.764	105.82	120.348	93.5574	109.197	101.913	113.847	-0.30671	0.0049349	0.020569	Tex30	chr1	-	44086613	44102441	1360	protein_coding	testis_expressed_30	69	122	82	77	90	101	104	138	96	123	80	114	85	114	2.52378	3.65957	2.42862	2.67244	3.76448	3.31227	2.9248	4.16425	3.39013	3.92114
ENSMUSG00000062944	225.823	228.038	222.205	259.897	210.32	256.687	224.552	302.213	287.697	244.611	275.994	318.969	292.551	308.586	-0.3067	1.8819e-05	0.00015965	9130023H24Rik	chr7	-	128234451	128238031	3581	protein_coding	RIKEN_cDNA_9130023H24_gene	216	264	261	258	174	269	282	329	261	250	236	333	244	309	3.00048	3.00752	2.93576	3.40073	2.76405	3.35036	3.01194	3.77041	3.50042	3.02678
ENSMUSG00000044712	479.873	461.259	451.221	478.492	493.164	461.845	516.788	645.762	686.726	491.178	540.294	651.348	576.708	571.234	-0.30651	4.0504e-06	3.9419e-05	Slc38a6	chr12	+	73286779	73354049	3927	protein_coding	solute_carrier_family_38_member_6	459	534	530	475	408	484	649	703	623	502	462	680	481	572	5.81425	5.5474	5.43625	5.70939	5.91018	5.49703	6.321	7.34669	7.61924	5.54228
ENSMUSG00000063450	6993.19	7064.86	7245.08	7921.81	7046.93	7714.91	8378.5	8901.97	10241.4	8095.63	9325.33	10822.9	8929.99	8796.21	-0.30613	1.0603e-07	1.3674e-06	Syne2	chr12	+	75818134	76110926	21704	protein_coding	spectrin_repeat_containing_nuclear_envelope_2	6689	8179	8510	7864	5830	8085	10522	9691	9291	8274	7974	11299	7448	8808	15.3307	15.3734	15.7934	17.1025	15.2802	16.6144	18.5422	18.3242	20.5592	16.528
ENSMUSG00000041343	389.963	321.326	323.517	335.448	319.106	327.299	282.681	434.489	483.905	373.765	356.687	429.124	387.27	397.467	-0.30579	3.2602e-05	0.00026219	Ankrd42	chr7	-	92581723	92637142	3542	protein_coding	ankyrin_repeat_domain_42	373	372	380	333	264	343	355	473	439	382	305	448	323	398	5.23844	4.28453	4.32135	4.43764	4.23991	4.31906	3.83338	5.48037	5.95251	4.67585
ENSMUSG00000030527	1188.71	1156.6	1303.43	1288.4	1254.67	1340.69	1310.68	1486.26	1660.05	1471.58	1579.95	1815.15	1551.48	1419.1	-0.30564	6.8624e-09	1.04e-07	Crtc3	chr7	-	80586627	80688877	5115	protein_coding	CREB_regulated_transcription_coactivator_3	1137	1339	1531	1279	1038	1405	1646	1618	1506	1504	1351	1895	1294	1421	11.0575	10.6793	12.0563	11.8027	11.5439	12.2511	12.308	12.9816	14.1405	12.7482
ENSMUSG00000051329	767.379	729.894	749.198	772.638	755.46	699.447	723.822	950.731	974.423	915.822	898.151	946.371	932.805	821.898	-0.30553	6.7331e-12	1.4942e-10	Nup160	chr2	+	90677215	90736328	5684	protein_coding	nucleoporin_160	734	845	880	767	625	733	909	1035	884	936	768	988	778	823	6.42368	6.06473	6.2361	6.36939	6.255	5.75166	6.11663	7.4728	7.46935	7.1395
ENSMUSG00000022639	303.188	341.193	286.057	312.279	321.524	321.574	298.606	438.163	531.303	346.369	339.145	321.843	374.081	386.482	-0.30541	0.00053801	0.0031	5330426P16Rik	chr16	-	50719294	50732773	2896	lincRNA	RIKEN_cDNA_5330426P16_gene	290	395	336	310	266	337	375	477	482	354	290	336	312	387	4.98128	5.56426	4.67332	5.05266	5.22498	5.19009	4.95262	6.75954	7.99343	5.29969
ENSMUSG00000018554	186.095	162.391	206.029	208.522	158.344	163.173	226.145	285.679	227.071	197.645	210.504	266.287	246.989	215.711	-0.30532	0.0013755	0.0069859	Ybx2	chr11	+	69935796	69941605	1673	protein_coding	Y_box_protein_2	178	188	242	207	131	171	284	311	206	202	180	278	206	216	5.29256	4.58428	5.82645	5.84024	4.45427	4.55873	6.49269	7.62889	5.91365	5.23481
ENSMUSG00000029761	613.694	650.427	612.98	639.668	607.994	571.581	648.175	715.575	731.92	683.931	760.154	727.978	1088.67	728.024	-0.30529	0.00010565	0.0007492	Cald1	chr6	+	34598500	34775473	4777	protein_coding	caldesmon_1	587	753	720	635	503	599	814	779	664	699	650	760	908	729	6.11258	6.43056	6.07102	6.27444	5.98982	5.59261	6.51735	6.69236	6.67571	6.34407
ENSMUSG00000041775	788.289	710.891	746.644	775.661	662.387	715.669	732.581	1014.11	995.366	807.215	946.099	873.573	936.402	809.914	-0.30529	1.2779e-07	1.63e-06	Mapk1ip1	chr7	-	138835823	138846273	1883	protein_coding	mitogen-activated_protein_kinase_1_interacting_protein_1	754	823	877	770	548	750	920	1104	903	825	809	912	781	811	19.9188	17.8303	18.76	19.3018	16.5551	17.7646	18.687	24.0611	23.0315	18.9954
ENSMUSG00000039158	1061.16	889.694	912.659	1076.86	1061.27	1041.06	1055.87	1231.82	1291.88	1172.17	1197.53	1335.26	1246.94	1320.23	-0.30485	1.8714e-09	3.0974e-08	Akna	chr4	-	63367125	63403354	5387	protein_coding	AT-hook_transcription_factor	1015	1030	1072	1069	878	1091	1326	1341	1172	1198	1024	1394	1040	1322	9.37262	7.80008	8.01553	9.36672	9.27148	9.03277	9.41453	10.216	10.4488	9.64174
ENSMUSG00000000308	2014.63	1810.48	2224.61	2066.08	2286.93	2214.76	1950.9	2468.23	2684.07	2873.69	2607.91	2478	2567.01	2391.79	-0.30483	5.8775e-09	9.0096e-08	Ckmt1	chr2	+	121357714	121363737	1620	protein_coding	creatine_kinase_mitochondrial_1_ubiquitous	1927	2096	2613	2051	1892	2321	2450	2687	2435	2937	2230	2587	2141	2395	59.1709	52.7819	64.9694	59.7595	66.4366	63.9004	57.8433	68.069	72.1886	78.6022
ENSMUSG00000040860	11088.3	8691.36	12191.5	13859.1	11804.5	11763.7	11194.2	13693.3	15319.6	13598.4	14017.2	16038.5	14830.2	12892.7	-0.30479	1.2961e-05	0.00011333	Crocc	chr4	-	141016637	141060550	6582	protein_coding	ciliary_rootlet_coiled-coil_rootletin	10606	10062	14320	13758	9766	12328	14058	14907	13898	13898	11986	16744	12369	12910	80.1559	62.3642	87.6334	98.6629	84.4035	83.5368	81.6898	92.9457	101.41	91.5462
ENSMUSG00000045464	156.821	172.756	128.556	144.051	169.223	153.63	183.145	220.459	200.616	190.796	184.776	196.362	196.632	194.739	-0.30468	0.00022089	0.0014174	2810002D19Rik	chr2	+	94406151	94411682	2040	processed_transcript	RIKEN_cDNA_2810002D19_gene	150	200	151	143	140	161	230	240	182	195	158	205	164	195	3.65766	3.99953	2.98148	3.30874	3.9039	3.51997	4.31221	4.82812	4.28475	4.14429
ENSMUSG00000025035	3068.47	3290.14	3599.55	3450.18	3585.11	3891.33	3186.73	4484.51	3658.5	4439.19	3929.41	4311.35	4577.7	4480.99	-0.30464	5.434e-08	7.2998e-07	Arl3	chr19	-	46531109	46573085	822	protein_coding	ADP-ribosylation_factor-like_3	2935	3809	4228	3425	2966	4078	4002	4882	3319	4537	3360	4501	3818	4487	177.614	189.038	207.18	196.673	205.258	221.268	186.212	243.738	193.919	239.3
ENSMUSG00000022802	1129.11	1101.32	1036.11	1060.74	1103.58	1039.15	1090.91	1325.51	1447.3	1263.17	1360.09	1353.46	1357.24	1257.31	-0.30462	1.2443e-14	3.6104e-13	Lmln	chr16	+	33062521	33127695	6147	protein_coding	leishmanolysin-like_(metallopeptidase_M8_family)	1080	1275	1217	1053	913	1089	1370	1443	1313	1291	1163	1413	1132	1259	8.73982	8.46167	7.97465	8.08578	8.44907	7.90147	8.52431	9.63386	10.2585	9.1056
ENSMUSG00000025496	2851.01	3051.74	2288.46	2399.51	2353.41	2368.39	2349.83	3620.13	3627.63	2822.81	3064	2783.56	2906.32	3184.73	-0.3046	2.1489e-05	0.00017974	Drd4	chr7	+	141292006	141294999	1334	protein_coding	dopamine_receptor_D4	2727	3533	2688	2382	1947	2482	2951	3941	3291	2885	2620	2906	2424	3189	101.688	108.043	81.163	84.2835	83.0255	82.983	84.6088	121.24	118.483	93.7639
ENSMUSG00000085622	369.053	356.741	294.571	372.72	275.592	272.908	330.458	530.94	445.325	349.304	366.043	370.694	416.045	371.502	-0.30444	0.0009307	0.0049977	3110056K07Rik	chr12	-	70991615	71015832	1063	antisense	RIKEN_cDNA_3110056K07_gene	353	413	346	370	228	286	415	578	404	357	313	387	347	372	16.519	15.8499	13.1107	16.4295	12.2012	11.9999	14.932	22.3147	18.2529	14.5606
ENSMUSG00000041995	349.189	393.884	378.004	402.941	374.708	351.155	418.049	494.197	464.063	446.17	521.582	453.07	495.178	448.399	-0.30441	1.6562e-07	2.0784e-06	Zbed3	chr13	+	95325237	95337841	1894	protein_coding	zinc_finger_BED_domain_containing_3	334	456	444	400	310	368	525	538	421	456	446	473	413	449	8.77219	9.82186	9.44251	9.96866	9.31072	8.66585	10.6018	11.6573	10.6755	10.4383
ENSMUSG00000008167	637.74	561.457	572.966	592.323	587.446	540.091	590.046	856.117	694.442	680.018	637.36	789.281	750.56	659.116	-0.30432	1.2219e-06	1.31e-05	Fbxw9	chr8	+	85060055	85067124	2327	protein_coding	F-box_and_WD-40_domain_protein_9	610	650	673	588	486	566	741	932	630	695	545	824	626	660	13.0399	11.3953	11.6494	11.9272	11.8807	10.8483	12.1793	16.4368	13.0026	12.9489
ENSMUSG00000024851	21162.5	18776	19776.3	21998.5	20507.4	18600.7	18610	26435.8	26960.9	23857.4	24229	24697.6	23591.1	22981.2	-0.3043	2.9536e-11	6.1324e-10	Pitpnm1	chr19	+	4099998	4113965	4981	protein_coding	phosphatidylinositol_transfer_protein_membrane-associated_1	20242	21737	23229	21838	16966	19493	23371	28779	24459	24383	20718	25784	19676	23012	202.152	178.029	187.845	206.944	193.76	174.544	179.458	237.113	235.834	212.235
ENSMUSG00000032590	1455.3	1263.71	1548.63	1503.98	1408.18	1393.17	1395.09	1805.93	1642.41	1907.96	1779.93	1718.41	1824.84	1663.77	-0.30349	7.2814e-11	1.4413e-09	Apeh	chr9	-	108085417	108094480	2388	protein_coding	acylpeptide_hydrolase	1392	1463	1819	1493	1165	1460	1752	1966	1490	1950	1522	1794	1522	1666	28.9966	24.993	30.6819	29.5109	27.7519	27.2685	28.0609	33.7867	29.9665	35.4035
ENSMUSG00000028246	1329.85	1329.36	1208.93	1266.24	1322.36	1269.12	1325.02	1458.71	1870.58	1531.26	1664.15	1554.62	1460.35	1679.75	-0.30335	3.7482e-09	5.9304e-08	Faxc	chr4	+	21931329	21996839	4465	protein_coding	failed_axon_connections_homolog_(Drosophila)	1272	1539	1420	1257	1094	1330	1664	1588	1697	1565	1423	1623	1218	1682	14.1712	14.0613	12.8101	13.2883	13.9379	13.2854	14.2539	14.5957	18.2534	15.1963
ENSMUSG00000054648	770.516	734.213	698.967	641.683	611.62	674.637	676.045	841.42	943.559	839.504	846.694	868.784	846.478	780.953	-0.30311	1.1626e-08	1.7093e-07	Zfp869	chr8	-	69706332	69710724	1590	protein_coding	zinc_finger_protein_869	737	850	821	637	506	707	849	916	856	858	724	907	706	782	23.0575	21.8087	20.7984	18.9103	18.1032	19.832	20.4227	23.6426	25.856	23.3957
ENSMUSG00000085900	102.457	126.112	77.4739	110.809	108.786	128.82	107.498	136.869	166.446	125.241	130.98	123.565	141.479	134.819	-0.30293	0.0030628	0.013799	A930041C12Rik	chr5	-	107630250	107633850	537	antisense	RIKEN_cDNA_A930041C12_gene	98	146	91	110	90	135	135	149	151	128	112	129	118	135	9.07807	11.0914	6.82577	9.66885	9.53388	11.2125	9.61527	11.387	13.5048	10.3343
[truncated: 1,684 more rows]
[truncated: 4 more columns]
