# Supplementary material for: Homeostatic plasticity in the retina is associated with maintenance of night vision during retinal degenerative disease
Source: eLife. 2020 Sep 22;9:e59422. doi: 10.7554/eLife.59422 (PMC7529457; doi:10.7554/eLife.59422)
Supplement: Supplementary file 4. [file elife-59422-supp4.xls]

## Sheet: HetvsWT_DEG_up
Gene_ID	P23h11_1	P23h11_2	P23h12_1	P23h12_2	P23h12_4	P23h12_8	P23h14_3	P23h11_3	P23h11_4	P23h12_3	P23h12_5	P23h12_6	P23h12_7	P23h13_1	log2FoldChange	pvalue	padj	GeneName	Chrom	Strand	Start	End	GeneLength	GeneType	GeneDescription	P23h11_1_readcount	P23h11_2_readcount	P23h12_1_readcount	P23h12_2_readcount	P23h12_4_readcount	P23h12_8_readcount	P23h14_3_readcount	P23h11_3_readcount	P23h11_4_readcount	P23h12_3_readcount	P23h12_5_readcount	P23h12_6_readcount	P23h12_7_readcount	P23h13_1_readcount	P23h11_1_fpkm	P23h11_2_fpkm	P23h12_1_fpkm	P23h12_2_fpkm	P23h12_4_fpkm	P23h12_8_fpkm	P23h14_3_fpkm	P23h11_3_fpkm	P23h11_4_fpkm	P23h12_3_fpkm
ENSMUSG00000028635	3603.76	3202.03	3075.12	3340.38	2902.17	3181.39	2546.52	157.077	100.308	167.314	173.081	175.289	191.836	168.774	4.0172	0	0	Edn2	chr4	+	120161206	120167360	1462	protein_coding	endothelin_2	3447	3707	3612	3316	2401	3334	3198	171	91	171	148	183	160	169	117.283	103.439	99.5142	107.059	93.4214	101.71	83.6629	4.80005	2.98936	5.07101
ENSMUSG00000085304	404.599	339.466	332.031	427.117	314.271	335.887	290.644	19.2902	24.2503	17.612	17.542	21.073	13.1888	7.98929	3.6482	2.1928e-182	3.4145e-179	Gm12802	chr4	+	107126613	107136252	1813	antisense	predicted_gene_12802	387	393	390	424	260	352	365	21	22	18	15	22	11	8	10.6183	8.84308	8.66466	11.0389	8.15787	8.65941	7.70011	0.475355	0.582786	0.430448
ENSMUSG00000026414	934.655	856.87	689.602	859.271	647.882	733.799	903.782	67.975	47.3984	55.7712	51.4566	72.7978	55.153	44.9397	3.4808	1.4908e-254	4.6429e-251	Tnnt2	chr1	+	135836354	135852260	3330	protein_coding	troponin_T2_cardiac	894	992	810	853	536	769	1135	74	43	57	44	76	46	45	13.3547	12.1528	9.79773	12.091	9.15634	10.2997	13.0363	0.911978	0.620167	0.742124
ENSMUSG00000053175	368.008	306.642	279.246	251.838	269.548	309.169	296.218	10.1044	4.40915	18.5904	28.0672	12.4523	27.5765	12.9826	3.4619	2.2151e-148	2.0695e-145	Bcl3	chr7	-	19808462	19822770	1850	protein_coding	B_cell_leukemia/lymphoma_3	352	355	328	250	223	324	372	11	4	19	24	13	23	13	9.46483	7.82826	7.14145	6.37859	6.85701	7.81118	7.69083	0.244016	0.103842	0.445274
ENSMUSG00000041782	1030.84	836.139	778.995	948.925	800.183	844.489	989.781	76.2422	67.2396	55.7712	81.8627	82.3764	53.954	46.9371	3.455	5.976e-286	2.2334e-282	Lad1	chr1	+	135818598	135833342	2993	protein_coding	ladinin	986	968	915	942	662	885	1243	83	61	57	70	86	45	47	16.3875	13.194	12.314	14.856	12.5821	13.188	15.8842	1.13807	0.978831	0.825684
ENSMUSG00000054779	1165.71	1139.33	1228.51	1234.01	934.353	1271.03	992.17	95.5324	87.0808	98.8227	94.7268	114.944	121.097	97.8688	3.2893	0	0	Fgf2os	chr3	-	37335332	37349740	1441	antisense	fibroblast_growth_factor_2_opposite_strand	1115	1319	1443	1225	773	1332	1246	104	79	101	81	120	101	98	38.4904	37.3413	40.3354	40.1263	30.5152	41.2272	33.0717	2.96187	2.63298	3.03881
ENSMUSG00000037225	610.558	608.101	677.683	671.903	653.926	662.232	523.955	55.1149	65.035	54.7928	86.5406	85.25	88.7244	67.909	2.9196	3.1927e-222	7.4573e-219	Fgf2	chr3	+	37312519	37405377	1240	protein_coding	fibroblast_growth_factor_2	584	704	796	667	541	694	658	60	59	56	74	89	74	68	23.4279	23.1611	25.8569	25.3899	24.8186	24.9621	20.2958	1.98576	2.28515	1.958
ENSMUSG00000073418	2368	2413.4	2508.96	2072.12	2285.72	2657.52	2177.04	204.844	122.354	272.985	312.248	176.247	294.949	209.719	2.7602	2.1289e-87	8.464e-85	C4b	chr17	-	34728380	34743882	5379	protein_coding	complement_component_4B_(Chido_blood_group)	2265	2794	2947	2057	1891	2785	2734	223	111	279	267	184	246	210	20.9464	21.1901	22.068	18.0505	19.9982	23.0923	19.4401	1.70138	0.991074	2.24879
ENSMUSG00000071637	1624.67	1655	1715.49	1615.79	1890.46	1744.32	1442.87	206.681	207.23	202.538	304.061	231.803	285.357	202.728	2.6949	8.8589e-253	2.3648e-249	Cebpd	chr16	+	15887286	15888466	1180	pseudogene	CCAAT/enhancer_binding_protein_(C/EBP)_delta	1554	1916	2015	1604	1564	1828	1812	225	188	207	260	242	238	203	65.5105	66.2403	68.7824	64.1622	75.3974	69.0936	58.7325	7.82524	7.65174	7.60561
ENSMUSG00000029718	3240.98	2942.9	2939.75	3050.26	2587.9	3194.75	2446.18	288.434	203.923	292.554	442.059	268.202	485.586	284.618	2.601	4.7916e-78	1.4923e-75	Pcolce	chr5	-	137605103	137613784	2573	protein_coding	procollagen_C-endopeptidase_enhancer_protein	3100	3407	3453	3028	2141	3348	3072	314	185	299	378	280	405	285	59.9327	54.0183	54.0557	55.5485	47.3345	58.0349	45.665	5.00826	3.45316	5.03822
ENSMUSG00000087593	72.1378	53.5544	59.5953	56.4117	41.097	50.5739	56.5362	0.918581	0	3.91377	3.5084	5.74719	5.99489	0	2.4829	4.8581e-47	7.3803e-45	Gm16174	chr7	+	19816553	19818625	402	antisense	predicted_gene_16174	69	62	70	56	34	53	71	1	0	4	3	6	5	0	8.53817	6.29179	7.01385	6.57535	4.81121	5.88021	6.75514	0.102087	0	0.4314
ENSMUSG00000031805	432.827	376.608	376.302	449.279	390.422	373.102	374.253	59.7078	61.7282	61.6419	91.2184	70.882	64.7448	50.9317	2.4149	2.3087e-153	2.3967e-150	Jak3	chr8	+	71676296	71690575	4049	protein_coding	Janus_kinase_3	414	436	442	446	323	391	470	65	56	63	78	74	54	51	5.08621	4.39286	4.39703	5.19929	4.53791	4.30697	4.43968	0.658814	0.66424	0.674588
ENSMUSG00000033488	535.284	541.59	505.708	468.418	484.703	612.613	375.846	76.2422	85.9785	74.3616	77.1848	75.6714	88.7244	95.8715	2.4106	2.7747e-134	1.9203e-131	BC026585	chr1	+	157458580	157489060	1618	protein_coding	cDNA_sequence_BC026585	512	627	594	465	401	642	472	83	78	76	66	79	74	96	15.741	15.8088	14.7874	13.5654	14.0983	17.697	11.1575	2.10522	2.31526	2.03648
ENSMUSG00000050174	906.428	840.458	748.346	770.624	725.241	844.489	684.804	164.426	153.218	119.37	140.336	102.492	137.882	152.795	2.3649	5.7854e-174	6.7566e-171	Nudt6	chr3	-	37404910	37420211	1264	protein_coding	nudix_(nucleoside_diphosphate_linked_moiety_X)-type_motif_6	867	973	879	765	600	885	860	179	139	122	120	107	115	153	34.1204	31.4033	28.0109	28.5674	27.0026	31.2277	26.0228	5.8117	5.28144	4.18464
ENSMUSG00000055368	195.504	207.307	167.718	165.206	147.466	216.609	122.628	27.5574	34.1709	25.4395	26.8977	18.1994	10.7908	17.9759	2.352	2.6219e-62	5.8325e-60	Slc6a2	chr8	+	92960079	93001667	6073	protein_coding	solute_carrier_family_6_(neurotransmitter_transporter_noradrenalin)_member_2	187	240	197	164	122	227	154	30	31	26	23	19	9	18	1.53172	1.61219	1.30661	1.27467	1.14277	1.66712	0.969883	0.202729	0.245156	0.185616
ENSMUSG00000053113	584.421	475.079	556.79	515.764	404.926	504.785	442.734	109.311	66.1373	88.0598	85.3711	82.3764	121.097	76.8969	2.2628	1.9114e-112	1.0823e-109	Socs3	chr11	-	117966079	117970047	2552	protein_coding	suppressor_of_cytokine_signaling_3	559	550	654	512	335	529	556	119	60	90	73	86	101	77	10.8961	8.79206	10.3224	9.46991	7.46733	9.24524	8.3329	1.91365	1.12916	1.529
ENSMUSG00000073152	70.0469	78.604	96.2038	56.4117	41.097	85.8803	66.8879	3.67432	11.0229	6.8491	7.0168	7.66292	4.79591	1.99732	2.2617	1.2552e-40	1.4568e-38	Gm10475	chr5	+	21910931	21954014	1796	antisense	predicted_gene_10475	67	91	113	56	34	90	84	4	10	7	6	8	4	2	1.85571	2.06702	2.53429	1.47176	1.0769	2.23501	1.78885	0.0914009	0.26741	0.168981
ENSMUSG00000029338	1544.17	1486.57	1924.08	1800.14	1565.31	1794.9	1420.57	311.399	278.879	311.145	349.671	374.525	356.096	342.541	2.2136	6.8553e-201	1.1645e-197	Antxr2	chr5	-	97882783	98030733	5427	protein_coding	anthrax_toxin_receptor_2	1477	1721	2260	1787	1295	1881	1784	339	253	318	299	391	297	343	13.5382	12.9369	16.7739	15.5425	13.5741	15.4587	12.5729	2.56352	2.23895	2.54046
ENSMUSG00000036030	946.156	973.481	1248.1	1126.22	965.78	1103.08	948.374	214.029	170.855	192.753	245.588	248.087	281.76	246.669	2.0648	1.8078e-128	1.1649e-125	Prtg	chr9	+	72806874	72917291	9148	protein_coding	protogenin_homolog_(Gallus_gallus)	905	1127	1466	1118	799	1156	1191	233	155	197	210	259	235	247	4.92112	5.02582	6.45494	5.76862	4.96846	5.63605	4.97952	1.04527	0.813748	0.933654
ENSMUSG00000032495	4213.27	3982.03	3988.63	3968.96	3673.35	4106.03	3576.91	890.105	920.411	950.068	962.471	962.655	955.585	827.89	2.0563	0	0	Lrrc2	chr9	+	110951545	110984066	3657	protein_coding	leucine_rich_repeat_containing_2	4030	4610	4685	3940	3039	4303	4492	969	835	971	823	1005	797	829	54.8178	51.4262	51.6023	50.8543	47.2723	52.4795	46.9804	10.8742	10.9659	11.5117
ENSMUSG00000015312	576.057	626.241	596.804	530.874	576.567	593.528	628.268	149.729	98.1037	115.456	150.861	141.764	152.27	141.81	2.0255	3.3436e-159	3.6752e-156	Gadd45b	chr10	+	80930091	80932204	1266	protein_coding	growth_arrest_and_DNA-damage-inducible_45_beta	551	725	701	527	477	622	789	163	89	118	129	148	127	142	21.6501	23.3622	22.3033	19.6487	21.4332	21.9129	23.8367	5.28386	3.3763	4.04105
ENSMUSG00000022146	571.875	591.69	738.13	695.072	597.115	657.461	643.397	133.194	130.07	171.227	174.251	162.837	135.484	144.806	1.9944	1.9486e-144	1.6551e-141	Osmr	chr15	-	6813577	6874969	5491	protein_coding	oncostatin_M_receptor	547	685	867	690	494	689	808	145	118	175	149	170	113	145	4.95539	5.08918	6.35993	5.93136	5.11772	5.59643	5.6281	1.08371	1.03208	1.38176
ENSMUSG00000051435	389.963	391.293	321.814	327.389	255.043	327.299	377.439	68.8936	103.615	56.7497	73.6764	77.5871	63.5458	96.8701	1.9253	1.2656e-68	3.1958e-66	Fhad1	chr4	-	141890438	142015082	4809	protein_coding	forkhead-associated_(FHA)_phosphopeptide_binding_domain_1	373	453	378	325	211	343	474	75	94	58	63	81	53	97	3.8583	3.84284	3.16608	3.18996	2.49591	3.18114	3.76986	0.640035	0.938766	0.5229
ENSMUSG00000016758	34.5007	26.7772	39.1626	38.2793	43.5145	28.6268	27.8699	2.75574	3.30687	4.89221	4.67787	0.957865	2.39796	1.99732	1.9139	3.7805e-27	2.4444e-25	Bik	chr15	+	83526862	83544635	943	protein_coding	BCL2-interacting_killer	33	31	46	38	36	30	35	3	3	5	4	1	2	2	1.74078	1.34109	1.96486	1.90208	2.17166	1.4189	1.41958	0.130559	0.15279	0.229882
ENSMUSG00000046718	307.37	325.645	403.545	318.323	334.82	352.109	214.997	59.7078	44.0915	77.297	91.2184	54.5983	98.3162	53.9277	1.9068	1.7278e-49	2.8074e-47	Bst2	chr8	-	71534264	71537437	764	protein_coding	bone_marrow_stromal_cell_antigen_2	294	377	474	316	277	369	270	65	40	79	78	57	82	54	19.1424	20.1306	24.9902	19.5232	20.6247	21.5415	13.5168	3.49154	2.5145	4.48311
ENSMUSG00000082361	1167.8	1290.49	987.579	1143.34	1108.41	1276.75	1016.06	304.969	284.39	269.072	279.503	295.023	299.744	316.576	1.894	2.4044e-178	3.2092e-175	Btc	chr5	-	91357261	91402994	2876	protein_coding	betacellulin_epidermal_growth_factor_family_member	1117	1494	1160	1135	917	1338	1276	332	258	275	239	308	250	317	19.32	21.1919	16.2463	18.6279	18.1377	20.7496	16.9693	4.73747	4.30839	4.14562
ENSMUSG00000078186	29.2733	33.6874	28.9463	40.2941	26.5922	44.8486	27.8699	6.43007	2.20458	1.95689	1.16947	3.83146	2.39796	1.99732	1.8673	1.1113e-25	6.6347e-24	Gm13821	chr5	-	114842349	114842862	514	protein_coding	predicted_gene_13821	28	39	34	40	22	47	35	7	2	2	1	4	2	2	2.7098	3.09535	2.66441	3.67328	2.43479	4.07829	2.6044	0.558897	0.186875	0.168699
ENSMUSG00000020227	84.6835	102.79	60.4466	65.4778	58.0193	71.5669	75.647	11.023	20.9435	8.80598	17.542	9.57865	10.7908	12.9826	1.8649	8.251e-33	7.0401e-31	Irak3	chr10	-	120141648	120202130	3097	protein_coding	interleukin-1_receptor-associated_kinase_3	81	119	71	65	48	75	95	12	19	9	15	10	9	13	1.30102	1.56753	0.923425	0.990669	0.881661	1.0801	1.17323	0.159015	0.294643	0.125993
ENSMUSG00000028036	66.9105	55.2819	81.7307	75.5513	48.3494	63.9331	58.1287	4.5929	7.71602	10.7629	15.2031	19.1573	10.7908	6.99063	1.8359	8.2911e-30	6.0995e-28	Ptgfr	chr3	-	151798918	151837630	4208	protein_coding	prostaglandin_F_receptor	64	64	96	75	40	67	73	5	7	11	13	20	9	7	0.756565	0.620459	0.918925	0.841283	0.540736	0.710137	0.663513	0.0487631	0.0798926	0.113335
ENSMUSG00000031762	1181.39	1377.73	1437.95	1595.64	1393.67	1780.58	992.966	302.213	254.629	358.11	406.975	335.253	399.26	295.604	1.8039	3.8392e-52	6.5217e-50	Mt2	chr8	+	94172618	94173567	556	protein_coding	metallothionein_2	1130	1595	1689	1584	1153	1866	1247	329	231	366	348	350	333	296	101.099	117.029	122.36	134.474	117.966	149.686	85.7815	24.2839	19.9536	28.5399
ENSMUSG00000074151	62.7286	61.3284	102.163	91.669	78.5678	99.2394	98.7392	13.7787	13.2275	7.82754	16.3725	23.9466	25.1785	6.99063	1.7953	3.9717e-29	2.8006e-27	Nlrc5	chr8	+	94472763	94527272	6945	protein_coding	NLR_family_CARD_domain_containing_5	60	71	120	91	65	104	124	15	12	8	14	25	21	7	0.429755	0.417057	0.695975	0.61848	0.532405	0.667889	0.682891	0.0886372	0.0829838	0.0499417
ENSMUSG00000030111	961.838	1171.29	1426.88	1082.9	1017.76	1393.17	917.319	92.7767	66.1373	183.947	293.536	127.396	187.041	101.863	1.7892	3.1307e-24	1.7056e-22	A2m	chr6	+	121636173	121679237	4670	protein_coding	alpha-2-macroglobulin	920	1356	1676	1075	842	1460	1152	101	60	188	251	133	156	102	9.7997	11.8455	14.4558	10.8655	10.2564	13.9437	9.43491	0.887568	0.617048	1.74537
ENSMUSG00000087236	20.9095	42.3252	35.7572	35.2573	24.1747	37.2148	29.4625	2.75574	6.61373	1.95689	2.33893	3.83146	2.39796	2.99598	1.7837	1.5701e-23	8.1272e-22	Gm1305	chr1	-	179695297	179745185	3449	protein_coding	predicted_gene_1305	20	49	42	35	20	39	37	3	6	2	2	4	2	3	0.288455	0.579578	0.490502	0.478996	0.329866	0.50433	0.410309	0.0356965	0.0835492	0.025141
ENSMUSG00000016763	336.643	302.323	278.395	321.345	286.47	337.796	281.885	29.3946	19.8412	31.3102	64.3207	32.5674	93.5203	33.9545	1.7773	2.073e-24	1.146e-22	Scube1	chr15	-	83602583	83725021	7824	protein_coding	signal_peptide_CUB_domain_EGF-like_1	322	350	327	319	237	354	354	32	18	32	55	34	78	34	2.04724	1.82494	1.68346	1.9245	1.72314	2.01798	1.73052	0.167849	0.110491	0.177324
ENSMUSG00000020932	3242.02	3186.49	3810.69	3286.99	2856.24	3310.21	2366.56	671.483	562.167	807.215	908.676	960.739	918.417	700.061	1.7748	1.9704e-54	3.5747e-52	Gfap	chr11	-	102887336	102900912	2648	protein_coding	glial_fibrillary_acidic_protein	3101	3689	4476	3263	2363	3469	2972	731	510	825	777	1003	766	701	58.254	56.8329	68.0858	58.1642	50.763	58.4292	42.9272	11.3291	9.24989	13.5077
ENSMUSG00000024206	895.973	734.213	794.32	794.8	722.824	756.701	759.655	255.366	207.23	214.279	226.877	222.225	275.765	191.743	1.7097	1.9009e-132	1.2686e-129	Rfx2	chr17	-	56775897	56831008	3353	protein_coding	regulatory_factor_X_2_(influences_HLA_class_II_expression)	857	850	933	789	598	793	954	278	188	219	194	232	230	192	12.7142	10.3418	11.2081	11.1071	10.1454	10.5483	10.8822	3.40258	2.69283	2.83176
ENSMUSG00000087168	3191.84	3121.7	2482.57	3042.2	2538.34	2962.87	2712.94	897.454	923.718	681.974	806.932	927.214	810.509	821.898	1.7084	2.4825e-140	1.9328e-137	Gm15983	chr16	+	5254786	5289621	4814	processed_transcript	predicted_gene_15983	3053	3614	2916	3020	2100	3105	3407	977	838	697	690	968	676	823	31.5473	30.626	24.3987	29.6113	24.815	28.7673	27.0687	8.32886	8.36031	6.27729
ENSMUSG00000028270	284.369	318.735	298.828	281.051	310.645	254.778	184.738	76.2422	88.1831	76.3185	85.3711	37.3568	79.1325	67.909	1.6631	5.341e-41	6.3166e-39	Gbp2	chr3	+	142620602	142638008	2516	protein_coding	guanylate_binding_protein_2	272	369	351	279	257	267	232	83	80	78	73	39	66	68	5.37774	5.98308	5.61928	5.2342	5.81064	4.73308	3.52679	1.35383	1.52709	1.34409
ENSMUSG00000086653	26.1369	12.9567	23.8381	14.1029	15.7136	32.4437	22.296	0	0	0.978443	0	0	0	1.99732	1.6625	4.5492e-20	1.9276e-18	9130015L21Rik	chr2	+	160016653	160040619	606	lincRNA	RIKEN_cDNA_9130015L21_gene	25	15	28	14	13	34	28	0	0	1	0	0	0	2	2.05215	1.00978	1.8611	1.09047	1.22032	2.50236	1.76721	0	0	0.071544
ENSMUSG00000057596	102.457	86.378	62.1494	64.4705	61.6455	69.6584	50.1659	18.3716	16.5343	11.7413	23.3893	8.62079	15.5867	12.9826	1.6301	8.1636e-25	4.6937e-23	Trim30d	chr7	-	104470014	104507849	3282	protein_coding	tripartite_motif-containing_30D	98	100	73	64	51	73	63	20	15	12	20	9	13	13	1.48535	1.243	0.895919	0.920445	0.883961	0.992036	0.734182	0.250085	0.219501	0.158522
ENSMUSG00000044646	242.55	234.085	219.651	274	210.32	278.634	177.571	88.1838	59.5236	50.879	58.4734	56.5141	82.7295	60.9183	1.627	5.0111e-45	6.8851e-43	Zbtb7c	chr18	+	75820178	76148561	4569	protein_coding	zinc_finger_and_BTB_domain_containing_7C	232	271	258	272	174	292	223	96	54	52	50	59	69	61	2.52586	2.41967	2.27449	2.80999	2.16635	2.85039	1.86675	0.862278	0.567619	0.493433
ENSMUSG00000023439	21171.9	18966.9	22121.8	22150.6	20229.4	23255.4	17479.2	6666.14	5615.06	6430.32	6060.18	6768.28	6729.86	7435.03	1.6202	3.3328e-153	3.2777e-150	Gnb3	chr6	-	124834240	124840275	1846	protein_coding	guanine_nucleotide_binding_protein_(G_protein)_beta_3	20251	21958	25984	21989	16736	24371	21951	7257	5094	6572	5182	7066	5613	7445	545.703	485.255	566.968	562.251	515.729	588.823	454.804	161.333	132.529	154.352
ENSMUSG00000023224	774.698	864.644	698.116	616.499	750.625	807.275	641.009	239.75	139.991	236.783	219.86	120.691	250.586	155.791	1.5927	1.5497e-31	1.259e-29	Serping1	chr2	-	84765387	84775444	1768	protein_coding	serine_(or_cysteine)_peptidase_inhibitor_clade_G_member_1	741	1001	820	612	621	846	805	261	127	242	188	126	209	156	20.8486	23.0973	18.6817	16.339	19.9807	21.3418	17.4147	6.05836	3.4499	5.93443
ENSMUSG00000032373	42.8645	67.3749	154.948	101.742	83.4028	91.6056	62.9064	9.18581	15.432	18.5904	25.7283	8.62079	19.1836	19.9732	1.5366	5.4107e-19	2.165e-17	Car12	chr9	+	66713686	66766845	3716	protein_coding	carbonic_anyhydrase_12	41	78	182	101	69	96	79	10	14	19	22	9	16	20	0.548845	0.856304	1.97279	1.28293	1.05627	1.15223	0.813118	0.110439	0.180941	0.221679
ENSMUSG00000057802	172.504	119.202	87.6902	161.176	101.534	125.004	152.887	48.6848	36.3755	23.4826	25.7283	43.1039	26.3775	36.9505	1.5332	5.1331e-26	3.1866e-24	Gm10030	chr9	+	111004811	111006830	306	protein_coding	predicted_gene_10030	165	138	103	160	84	131	192	53	33	24	22	45	22	37	26.8228	18.3978	13.5581	24.6806	15.6156	19.0938	23.9984	7.10807	5.17937	3.40044
ENSMUSG00000035929	271.824	308.37	286.057	239.75	257.461	256.687	208.626	108.393	84.8762	90.9952	50.2871	64.177	94.7192	60.9183	1.5156	2.2686e-38	2.4223e-36	H2-Q4	chr17	+	35379617	35385290	2596	protein_coding	histocompatibility_2_Q_region_locus_4	260	357	336	238	213	269	262	118	77	93	43	67	79	61	4.98208	5.61012	5.21338	4.32742	4.66741	4.62158	3.8601	1.86541	1.42453	1.55319
ENSMUSG00000034459	278.097	269.5	224.759	171.25	242.956	228.06	195.09	67.975	63.9327	99.8011	64.3207	56.5141	77.9336	57.9223	1.5151	3.4398e-38	3.6521e-36	Ifit1	chr19	+	34640871	34650009	2656	protein_coding	interferon-induced_protein_with_tetratricopeptide_repeats_1	266	312	264	170	201	239	245	74	58	102	55	59	65	58	4.9819	4.79221	4.00369	3.02119	4.30496	4.01341	3.52809	1.14341	1.04878	1.66501
ENSMUSG00000090873	123.366	88.1056	112.38	89.6543	111.204	97.331	119.443	33.0689	20.9435	27.3964	23.3893	47.8933	33.5714	23.9679	1.5046	7.3474e-29	5.1316e-27	Gm17112	chr5	+	137532423	137540718	432	antisense	predicted_gene_17112	118	102	132	89	92	102	150	36	19	28	20	50	28	24	13.5875	9.6322	12.3076	9.7244	12.1145	10.5308	13.2804	3.41992	2.11229	2.81009
ENSMUSG00000057469	1956.09	1883.04	1998.14	1810.21	1712.78	1985.74	1745.45	666.89	685.623	661.427	713.375	586.214	647.448	582.219	1.4965	8.3424e-181	1.1991e-177	E2f6	chr12	+	16810965	16826743	2421	protein_coding	E2F_transcription_factor_6	1871	2180	2347	1797	1417	2081	2192	726	622	676	610	612	540	583	38.4433	36.7342	39.0484	35.0356	33.2948	38.3372	34.6296	12.3066	12.339	12.1059
ENSMUSG00000030862	95.1383	120.929	189.002	145.059	124.5	144.088	109.091	27.5574	15.432	41.0946	54.965	28.736	47.9591	28.9612	1.487	1.4844e-22	7.2422e-21	Cpxm2	chr7	-	132042816	132154739	3498	protein_coding	carboxypeptidase_X_2_(M14_family)	91	140	222	144	103	151	137	30	14	42	47	30	40	29	1.29409	1.63274	2.55633	1.94312	1.67502	1.92531	1.49797	0.351964	0.192217	0.520565
ENSMUSG00000068699	113.957	133.022	148.137	117.86	100.325	131.683	87.5912	35.8247	12.1252	33.267	33.9145	30.6517	37.1683	51.9304	1.4547	1.1326e-23	5.8954e-22	Flnc	chr6	+	29433153	29461888	9166	protein_coding	filamin_C_gamma	109	154	174	117	83	138	110	39	11	34	29	32	31	52	0.591546	0.685409	0.764635	0.602508	0.51511	0.671495	0.459002	0.174615	0.0576365	0.160822
ENSMUSG00000061808	621.013	1182.52	2198.21	1399.21	1350.16	1448.51	993.762	96.451	84.8762	243.632	291.197	110.155	305.739	147.802	1.4392	2.39e-15	7.394e-14	Ttr	chr18	+	20665250	20674324	1219	protein_coding	transthyretin	594	1369	2582	1389	1117	1518	1248	105	77	249	249	115	255	148	24.2395	45.8151	85.3173	53.7843	52.1256	55.5407	39.1573	3.53494	3.03369	8.85608
ENSMUSG00000004040	4803.96	4619.5	4937.04	4817.15	4681.43	4685.25	4604.11	1723.26	1665.56	1819.9	1687.54	1838.14	1845.23	1574.89	1.4327	0	0	Stat3	chr11	-	100885098	100939540	6042	protein_coding	signal_transducer_and_activator_of_transcription_3	4595	5348	5799	4782	3873	4910	5782	1876	1511	1860	1443	1919	1539	1577	37.8309	36.1093	38.6596	37.3582	36.4643	36.2447	36.6015	12.7423	12.0107	13.3468
ENSMUSG00000030921	130.684	164.982	97.0552	65.4778	87.029	65.8415	78.8321	33.0689	17.6366	24.4611	28.0672	24.9045	26.3775	24.9665	1.4257	3.8231e-19	1.5363e-17	Trim30a	chr7	-	104409025	104465193	3771	protein_coding	tripartite_motif-containing_30A	125	191	114	65	72	69	99	36	16	25	24	26	22	25	1.6489	2.06626	1.21768	0.813605	1.08612	0.816086	1.00411	0.391781	0.203774	0.287428
ENSMUSG00000036887	347.098	354.15	395.032	312.279	346.907	370.239	291.44	115.741	52.9098	138.939	102.913	91.9551	145.076	131.823	1.4256	3.4313e-32	2.8752e-30	C1qa	chr4	-	136895917	136898803	1040	protein_coding	complement_component_1_q_subcomponent_alpha_polypeptide	332	410	464	310	287	388	366	126	48	142	88	96	121	132	15.8799	16.0827	17.9709	14.0697	15.6982	16.6396	13.4601	4.97204	2.21663	5.91971
ENSMUSG00000036905	356.507	326.509	362.68	335.448	310.645	399.82	303.384	125.846	60.6259	142.853	136.828	104.407	130.689	100.865	1.416	9.0825e-38	9.4286e-36	C1qb	chr4	-	136880129	136886187	1088	protein_coding	complement_component_1_q_subcomponent_beta_polypeptide	341	378	426	333	257	419	381	137	55	146	117	109	109	101	15.5908	14.1733	15.7712	14.4468	13.4371	17.1763	13.3936	5.1676	2.42783	5.81795
ENSMUSG00000031765	2204.91	2599.98	2419.57	2761.15	2462.19	2961.91	1816.32	823.049	865.296	944.197	1009.25	867.826	930.407	734.016	1.4009	3.2996e-65	8.0072e-63	Mt1	chr8	+	94179089	94180325	540	protein_coding	metallothionein_1	2109	3010	2842	2741	2037	3104	2281	896	785	965	863	906	776	735	194.278	227.395	211.99	239.592	214.585	256.372	161.56	68.0944	69.8169	77.4782
ENSMUSG00000032372	105.593	100.199	58.7439	59.4337	78.5678	74.4296	80.4247	31.2318	11.0229	26.4179	19.8809	10.5365	26.3775	24.9665	1.3973	9.0016e-19	3.5561e-17	Plscr2	chr9	+	92275602	92297752	1900	protein_coding	phospholipid_scramblase_2	101	116	69	59	65	78	101	34	10	27	17	11	22	25	2.64429	2.49065	1.46278	1.46573	1.94608	1.83098	2.03315	0.734383	0.252773	0.616107
ENSMUSG00000015852	77.3652	77.7402	98.7579	100.735	85.8202	112.599	89.9801	23.8831	26.4549	24.4611	33.9145	27.7781	25.1785	41.9438	1.3944	7.044e-26	4.2735e-24	Fcrls	chr3	-	87250758	87263738	2273	protein_coding	Fc_receptor-like_S_scavenger_receptor	74	90	116	100	71	118	113	26	24	25	29	29	21	42	1.61947	1.6153	2.05562	2.07662	1.77689	2.3154	1.90143	0.46943	0.507103	0.476855
ENSMUSG00000037921	195.504	202.988	131.11	148.081	125.709	143.134	166.423	49.6034	65.035	52.8359	50.2871	40.2303	64.7448	47.9357	1.3855	1.0023e-29	7.316e-28	Ddx60	chr8	+	61928087	62037701	5992	protein_coding	DEAD_(Asp-Glu-Ala-Asp)_box_polypeptide_60	187	235	154	147	104	150	209	54	59	54	43	42	54	48	1.55243	1.59994	1.03522	1.15798	0.987331	1.11651	1.33406	0.369844	0.472895	0.390722
ENSMUSG00000064179	1237.84	1089.23	997.795	845.168	983.911	1057.28	977.837	366.514	414.46	388.442	371.891	382.188	374.081	366.509	1.3813	2.4553e-93	1.119e-90	Tnnt1	chr7	-	4504570	4516382	1059	protein_coding	troponin_T1_skeletal_slow	1184	1261	1172	839	814	1108	1228	399	376	397	318	399	312	367	55.6157	48.5767	44.5775	37.3958	43.725	46.6646	44.3511	15.4623	17.052	16.2533
ENSMUSG00000026415	108.729	145.115	112.38	129.948	117.247	150.768	117.054	50.522	44.0915	35.2239	46.7787	45.9775	38.3673	36.9505	1.3802	2.1855e-32	1.8479e-30	Fcamr	chr1	+	130800902	130814740	1879	protein_coding	Fc_receptor_IgA_IgM_high_affinity	104	168	132	129	97	158	147	55	40	36	40	48	32	37	2.75327	3.64747	2.82964	3.24056	2.93661	3.75037	2.99221	1.20125	1.02239	0.830656
ENSMUSG00000034248	3705.17	3373.93	2657.95	3084.51	2618.12	3020.12	2962.18	1286.93	1319.44	932.456	1004.57	1127.41	1136.63	1048.59	1.3783	7.7779e-71	2.236e-68	Slc25a37	chr14	-	69241848	69285112	5927	protein_coding	solute_carrier_family_25_member_37	3544	3906	3122	3062	2166	3165	3720	1401	1197	953	859	1177	948	1050	29.7441	26.8848	21.2169	24.3852	20.7886	23.8167	24.0055	9.70064	9.69937	6.97114
ENSMUSG00000042613	2999.47	2961.04	2840.99	2854.83	2824.82	3022.99	2678.7	1081.17	1001.98	1088.03	1229.11	1041.2	1154.62	1127.49	1.3669	7.001e-219	1.4536e-215	Pbxip1	chr3	+	89436706	89450952	4479	protein_coding	pre_B_cell_leukemia_transcription_factor_interacting_protein_1	2869	3428	3337	2834	2337	3168	3364	1177	909	1112	1051	1087	963	1129	31.8633	31.2226	30.0096	29.8659	29.681	31.5462	28.7261	10.7843	9.74692	10.7639
ENSMUSG00000001510	35.5462	48.3717	45.1221	34.2499	33.8446	40.0775	51.7585	12.8601	12.1252	5.87066	7.0168	13.4101	11.9898	12.9826	1.3639	6.7622e-17	2.3313e-15	Dlx3	chr11	+	95120119	95125296	2607	protein_coding	distal-less_homeobox_3	34	56	53	34	28	42	65	14	11	6	6	14	10	13	0.648753	0.876306	0.818878	0.615594	0.610968	0.718541	0.953618	0.220386	0.202645	0.0997829
ENSMUSG00000097828	1713.53	1587.63	1771.68	1770.92	1761.13	2024.87	1308.29	660.46	618.384	604.677	575.378	634.107	658.239	717.039	1.359	8.8945e-80	2.9158e-77	6430562O15Rik	chr13	-	99396924	99412864	3985	lincRNA	RIKEN_cDNA_6430562O15_gene	1639	1838	2081	1758	1457	2122	1643	719	561	618	492	662	549	718	20.4594	18.8159	21.0343	20.8232	20.7985	23.7498	15.7693	7.40453	6.76113	6.72366
ENSMUSG00000020627	3988.49	3647.74	4062.7	4264.12	3927.18	4043.05	3488.52	1369.6	1429.67	1566.49	1595.15	1540.25	1579.05	1464.04	1.3551	4.544e-178	5.6606e-175	Klhl29	chr12	-	5077472	5375682	7041	protein_coding	kelch-like_29	3815	4223	4772	4233	3249	4237	4381	1491	1297	1601	1364	1608	1317	1466	26.9527	24.4678	27.2992	28.3773	26.2492	26.8391	23.798	8.69041	8.84688	9.85832
ENSMUSG00000060802	1282.8	1521.98	1474.56	1202.78	1403.34	1313.97	1220.7	555.741	407.847	600.764	599.937	378.357	483.188	445.403	1.3531	1.023e-54	1.9116e-52	B2m	chr2	+	122147686	122153083	860	protein_coding	beta-2_microglobulin	1227	1762	1732	1194	1161	1377	1533	605	370	614	513	395	403	446	70.9721	83.5827	81.1211	65.5334	76.7954	71.4133	68.1782	28.8705	20.6627	30.9539
ENSMUSG00000034855	25.0914	23.3221	34.0544	14.1029	26.5922	14.3134	11.9443	2.75574	1.10229	4.89221	3.5084	0.957865	0	1.99732	1.3475	1.2241e-13	3.2818e-12	Cxcl10	chr5	-	92346638	92348889	1094	protein_coding	chemokine_(C-X-C_motif)_ligand_10	24	27	40	14	22	15	15	3	1	5	3	1	0	2	1.09128	1.00683	1.47274	0.604042	1.14395	0.611529	0.524416	0.112538	0.0439003	0.198152
ENSMUSG00000027078	217.459	209.899	218.8	218.595	175.267	187.982	173.59	85.428	72.751	72.4047	79.5238	44.0618	82.7295	63.9143	1.3469	1.8476e-36	1.8267e-34	Ube2l6	chr2	+	84798828	84810335	1560	protein_coding	ubiquitin-conjugating_enzyme_E2L_6	208	243	257	217	145	197	218	93	66	74	68	46	69	64	6.63255	6.35463	6.6358	6.56586	5.28743	5.63229	5.34483	2.44656	2.03191	2.05661
ENSMUSG00000037735	173.549	140.796	121.745	132.97	163.179	157.447	187.923	62.4635	57.319	45.9868	47.9482	38.3146	57.5509	63.9143	1.344	4.5322e-30	3.4149e-28	2810032G03Rik	chr12	+	5375870	5416631	2514	lincRNA	RIKEN_cDNA_2810032G03_gene	166	163	143	132	135	165	236	68	52	47	41	40	48	64	3.28462	2.64503	2.29116	2.47837	3.05471	2.92726	3.59045	1.11005	0.993396	0.810547
ENSMUSG00000029561	662.832	679.795	689.602	516.771	651.508	592.574	554.214	245.261	184.082	255.373	206.996	192.531	309.336	229.692	1.3265	4.9972e-48	7.7171e-46	Oasl2	chr5	+	114896936	114912234	3123	protein_coding	2'-5'_oligoadenylate_synthetase-like_2	634	787	810	513	539	621	696	267	167	261	177	201	258	230	10.0986	10.2804	10.4471	7.75358	9.81789	8.86876	8.52392	3.50862	2.5682	3.62338
ENSMUSG00000034394	65.865	63.9198	105.569	64.4705	53.1844	67.75	82.0172	7.34865	25.3526	21.5257	8.18627	10.5365	37.1683	16.9772	1.3232	1.0199e-14	2.9871e-13	Lif	chr11	+	4257557	4272514	4026	protein_coding	leukemia_inhibitory_factor	63	74	124	64	44	71	103	8	23	22	7	11	31	17	0.77841	0.749837	1.2406	0.750348	0.621699	0.786553	0.978511	0.081548	0.274371	0.236916
ENSMUSG00000022272	5495.02	4988.33	4138.47	4853.42	4451.77	4612.72	4664.63	1793.07	2026.01	1720.1	1781.1	2069.95	1809.26	1767.63	1.3227	8.6942e-121	5.4154e-118	Myo10	chr15	+	25622525	25813673	8125	protein_coding	myosin_X	5256	5775	4861	4818	3683	4834	5858	1952	1838	1758	1523	2161	1509	1770	32.1791	28.996	24.0983	27.9898	25.7857	26.5355	27.5758	9.85947	10.8644	9.38083
ENSMUSG00000026628	296.915	310.097	422.275	281.051	287.679	323.482	285.866	124.927	106.922	105.672	116.947	101.534	142.678	122.835	1.3202	3.2346e-42	4.0294e-40	Atf3	chr1	-	191170296	191183340	1984	protein_coding	activating_transcription_factor_3	284	359	496	279	238	339	359	136	97	108	100	106	119	123	7.12063	7.38179	10.0699	6.63772	6.82396	7.62081	6.92078	2.81316	2.34809	2.36009
ENSMUSG00000040152	168.322	270.363	407.802	336.455	275.592	272.908	210.219	55.1149	55.1144	80.2323	85.3711	62.2613	112.704	104.859	1.3187	2.6647e-16	8.751e-15	Thbs1	chr2	+	118111876	118127133	5848	protein_coding	thrombospondin_1	161	313	479	334	228	286	264	60	50	82	73	65	94	105	1.36949	2.18346	3.29923	2.69585	2.21783	2.18123	1.72663	0.421057	0.410627	0.607928
ENSMUSG00000021702	35.5462	36.2788	44.2708	31.2279	49.5582	35.3063	15.9257	1.83716	2.20458	9.78443	10.5252	9.57865	9.59182	3.99464	1.3186	2.1896e-13	5.7223e-12	Thbs4	chr13	-	92751590	92794818	3198	protein_coding	thrombospondin_4	34	42	52	31	41	37	20	2	2	10	9	10	8	4	0.528862	0.535772	0.654952	0.457551	0.729301	0.51602	0.239196	0.0256654	0.0300356	0.135571
ENSMUSG00000086706	101.411	90.6969	97.9065	95.6984	71.3154	110.69	71.6656	39.499	29.7618	32.2886	37.423	27.7781	27.5765	17.9759	1.3172	4.2857e-22	2.0274e-20	Gm15848	chr1	-	130809977	130824084	832	antisense	predicted_gene_15848	97	105	115	95	59	116	90	43	27	33	32	29	23	18	5.79949	5.14843	5.56748	5.3896	4.03395	6.21839	4.13734	2.12101	1.55856	1.71964
ENSMUSG00000038642	636.695	693.616	746.644	591.315	626.125	760.517	531.121	302.213	207.23	288.641	247.927	205.941	245.79	229.692	1.3166	2.9372e-49	4.7315e-47	Ctss	chr3	+	95526786	95556403	1355	protein_coding	cathepsin_S	609	803	877	587	518	797	667	329	188	295	212	215	205	230	22.3573	24.176	26.0702	20.4482	21.7466	26.2339	18.8273	9.96446	6.66351	9.43905
ENSMUSG00000028268	283.324	266.908	269.881	214.566	239.33	193.708	183.145	99.2067	70.5465	95.8874	77.1848	68.9663	105.51	79.8929	1.3104	9.7462e-32	7.9876e-30	Gbp3	chr3	+	142560052	142573209	2682	protein_coding	guanylate_binding_protein_3	271	309	317	213	198	203	230	108	64	98	66	72	88	80	5.02634	4.70012	4.76086	3.74867	4.1996	3.37583	3.27998	1.65258	1.14606	1.58421
ENSMUSG00000067642	34.5007	42.3252	37.4599	61.4484	32.6359	43.8944	33.4439	5.51149	6.61373	17.612	14.0336	13.4101	3.59693	8.98795	1.3058	3.5233e-14	9.8706e-13	Gpr113	chr5	-	30193431	30205722	3102	protein_coding	G_protein-coupled_receptor_113	33	49	44	61	27	46	42	6	6	18	12	14	3	9	0.529193	0.644411	0.571341	0.928207	0.495135	0.661393	0.517857	0.0793792	0.0928953	0.25158
ENSMUSG00000003545	208.05	234.948	199.218	244.786	201.859	189.891	203.052	92.7767	65.035	85.1245	54.965	75.6714	93.5203	84.8862	1.3031	4.0167e-39	4.415e-37	Fosb	chr7	-	19302721	19310045	3751	protein_coding	FBJ_osteosarcoma_oncogene_B	199	272	234	243	167	199	255	101	59	87	47	79	78	85	2.63905	2.95822	2.51277	3.05785	2.53262	2.36619	2.60013	1.10502	0.755422	1.00558
ENSMUSG00000031844	36.5917	35.415	79.1766	52.3823	50.7669	58.2077	50.1659	11.023	5.51144	19.5689	15.2031	14.368	17.9847	14.9799	1.303	4.7675e-15	1.4415e-13	Hsd17b2	chr8	+	117701946	117759029	1280	protein_coding	hydroxysteroid_(17-beta)_dehydrogenase_2	35	41	93	52	42	61	63	12	5	20	13	15	15	15	1.36019	1.30672	2.92656	1.91756	1.86655	2.12551	1.88249	0.384741	0.187605	0.677432
ENSMUSG00000042828	78.4107	42.3252	57.8926	68.4999	47.1407	61.0704	54.1473	11.9416	16.5343	15.6551	22.2199	20.1152	8.39284	25.9652	1.3016	1.5757e-16	5.2483e-15	Trim72	chr7	+	128003989	128011393	2472	protein_coding	tripartite_motif-containing_72	75	49	68	68	39	64	68	13	15	16	19	21	7	26	1.50923	0.808642	1.10801	1.29843	0.897465	1.15472	1.05211	0.21582	0.291425	0.280619
ENSMUSG00000030669	72.1378	52.6906	66.4062	52.3823	49.5582	68.7042	46.9808	20.2088	22.0458	24.4611	4.67787	15.3258	16.7857	17.9759	1.3006	8.8356e-17	3.0183e-15	Calca	chr7	-	114631480	114636357	992	protein_coding	calcitonin/calcitonin-related_polypeptide_alpha	69	61	78	52	41	72	59	22	20	25	4	16	14	18	3.46002	2.50857	3.16714	2.47428	2.35111	3.23716	2.2748	0.91014	0.968284	1.09263
ENSMUSG00000035413	591.739	592.553	647.886	600.381	661.178	646.965	536.695	214.948	197.31	264.179	277.164	196.362	270.969	247.668	1.2973	1.2439e-64	2.9799e-62	Tmem98	chr11	+	80810175	80822033	1633	protein_coding	transmembrane_protein_98	566	686	761	596	547	678	674	234	179	270	237	205	226	248	17.2414	17.1375	18.7708	17.2273	19.0547	18.5177	15.7861	5.88067	5.26443	7.16842
ENSMUSG00000037846	121.275	128.703	103.015	110.809	100.325	115.461	102.721	58.7892	45.1938	32.2886	29.2367	43.1039	26.3775	40.9451	1.2797	2.7843e-24	1.5213e-22	Rtkn2	chr10	+	67979570	68059740	4432	protein_coding	rhotekin_2	116	149	121	110	83	121	129	64	41	33	25	45	22	41	1.30197	1.3715	1.09969	1.17152	1.06532	1.21767	1.11325	0.592621	0.444292	0.32282
ENSMUSG00000042717	51.2283	59.6009	40.8653	24.1764	27.8009	49.6197	57.3324	14.6973	15.432	7.82754	9.35574	7.66292	8.39284	15.9786	1.2794	1.0762e-13	2.902e-12	Ppp1r3a	chr6	-	14713822	14755274	7120	protein_coding	protein_phosphatase_1_regulatory_(inhibitor)_subunit_3A	49	69	48	24	23	52	72	16	14	8	8	8	7	16	0.34234	0.395347	0.271547	0.159106	0.183759	0.325737	0.386772	0.0922225	0.0944349	0.0487142
ENSMUSG00000090399	144.276	165.846	143.88	173.264	120.874	137.408	139.35	50.522	42.9892	38.1593	76.0154	60.3455	51.556	57.9223	1.2788	3.8987e-28	2.6685e-26	Nav1	chr1	-	135606447	135688105	1645	lincRNA	neuron_navigator_1	138	192	169	172	100	144	175	55	39	39	65	63	43	58	4.17306	4.7615	4.13814	4.93536	3.45808	3.90427	4.06887	1.37213	1.13863	1.02788
ENSMUSG00000058952	141.139	121.793	109.826	99.7278	50.7669	79.2007	89.1838	39.499	35.2732	24.4611	33.9145	29.6938	26.3775	32.9558	1.2764	2.0156e-17	7.2993e-16	Cfi	chr3	+	129836739	129875328	2073	protein_coding	complement_component_factor_i	135	141	129	99	42	83	112	43	32	25	29	31	22	33	3.23949	2.77478	2.50654	2.2542	1.15253	1.78576	2.06643	0.851268	0.74137	0.522861
ENSMUSG00000029798	197.595	196.078	217.097	206.507	155.927	187.982	138.553	75.3236	46.2961	59.685	57.3039	74.7135	80.3315	83.8875	1.2728	1.0095e-27	6.6656e-26	Herc6	chr6	+	57580992	57665136	5279	protein_coding	hect_domain_and_RLD_6	189	227	255	205	129	197	174	82	42	61	49	78	67	84	1.78095	1.75422	1.94569	1.83298	1.39008	1.6644	1.26066	0.637469	0.382104	0.500984
ENSMUSG00000036814	33.4552	59.6009	90.2443	45.3308	61.6455	51.5282	36.6291	8.26723	15.432	8.80598	25.7283	11.4944	17.9847	8.98795	1.2685	2.743e-13	7.099e-12	Slc6a20a	chr9	-	123636122	123678885	2732	protein_coding	solute_carrier_family_6_(neurotransmitter_transporter)_member_20A	32	69	106	45	51	54	46	9	14	9	22	12	15	9	0.582654	1.03033	1.56282	0.777479	1.06192	0.881569	0.64399	0.135194	0.246111	0.142826
ENSMUSG00000061232	1157.34	1271.48	1287.26	1124.2	1334.44	1124.08	1085.34	529.103	416.665	623.268	484.159	387.935	466.402	418.439	1.2636	2.7713e-55	5.3386e-53	H2-K1	chr17	-	33996017	34000333	1874	protein_coding	histocompatibility_2_K1_K_region	1107	1472	1512	1116	1104	1178	1363	576	378	637	414	405	389	419	29.3846	32.044	32.4988	28.1094	33.512	28.0362	27.8182	12.6139	9.68739	14.7372
ENSMUSG00000024697	163.094	158.936	160.907	137	161.971	156.493	149.701	61.5449	47.3984	57.7281	70.168	58.4298	57.5509	67.909	1.2595	2.235e-37	2.2946e-35	Gna14	chr19	+	16435667	16610818	3383	protein_coding	guanine_nucleotide_binding_protein_alpha_14	156	184	189	136	134	164	188	67	43	59	60	61	48	68	2.29385	2.21883	2.25032	1.89755	2.25322	2.16215	2.12548	0.812774	0.610451	0.756129
ENSMUSG00000042417	50.1828	53.5544	49.3789	54.397	47.1407	62.0246	50.1659	24.8017	9.9206	24.4611	11.6947	13.4101	17.9847	13.9813	1.2592	1.5166e-16	5.0697e-15	Ccno	chr13	+	112987802	112990778	1876	protein_coding	cyclin_O	48	62	58	54	39	65	63	27	9	25	10	14	15	14	1.27277	1.34824	1.24532	1.35868	1.18259	1.54534	1.28443	0.590647	0.230406	0.577767
ENSMUSG00000021091	910.609	1185.11	990.133	806.888	935.561	1000.03	692.767	113.904	59.5236	192.753	406.975	104.407	191.836	96.8701	1.2519	5.7893e-12	1.2971e-10	Serpina3n	chr12	+	104406729	104414329	2064	protein_coding	serine_(or_cysteine)_peptidase_inhibitor_clade_A_member_3N	871	1372	1163	801	774	1048	870	124	54	197	348	109	160	97	20.9918	27.1177	22.6963	18.3181	21.3321	22.6462	16.1217	2.46552	1.25652	4.13811
ENSMUSG00000036896	254.051	209.035	256.26	240.757	264.713	253.824	196.682	122.171	58.4213	109.586	86.5406	77.5871	89.9233	95.8715	1.2402	8.7449e-30	6.4081e-28	C1qc	chr4	-	136889804	136893065	1203	protein_coding	complement_component_1_q_subcomponent_C_chain	243	242	301	239	219	266	247	133	53	112	74	81	75	96	10.0481	8.20651	10.0783	9.37754	10.3557	9.86187	7.85296	4.53715	2.1159	4.03644
ENSMUSG00000066319	47.0464	32.8237	37.4599	48.3529	30.2184	29.581	58.925	10.1044	7.71602	14.6766	7.0168	6.70506	13.1888	17.9759	1.2396	3.9295e-13	9.9901e-12	Rtp3	chr9	-	110985871	110989611	1425	protein_coding	receptor_transporter_protein_3	45	38	44	48	25	31	74	11	7	15	6	7	11	18	1.57087	1.08787	1.24372	1.58995	0.997991	0.970265	1.98618	0.316792	0.235922	0.456375
ENSMUSG00000038173	21.955	13.8205	16.1759	22.1617	18.131	9.54225	15.1294	0	2.20458	2.93533	2.33893	2.8736	1.19898	3.99464	1.2369	1.0339e-11	2.2543e-10	Enpp6	chr8	+	46986925	47094895	3421	protein_coding	ectonucleotide_pyrophosphatase/phosphodiesterase_6	21	16	19	22	15	10	19	0	2	3	2	3	1	4	0.305357	0.190799	0.22371	0.303547	0.249425	0.130374	0.212424	0	0.0280777	0.0380202
ENSMUSG00000059182	171.458	168.437	131.961	183.338	158.344	166.035	134.572	61.5449	52.9098	55.7712	72.507	54.5983	62.3468	72.9023	1.2338	4.313e-31	3.4149e-29	Skap2	chr6	-	51859166	52012549	1638	protein_coding	src_family_associated_phosphoprotein_2	164	195	155	182	131	174	169	67	48	57	62	57	52	73	4.98049	4.85657	3.81156	5.24462	4.54945	4.73782	3.94616	1.67864	1.40738	1.50871
ENSMUSG00000035692	107.684	123.521	137.069	72.5293	129.335	98.2852	67.6841	31.2318	26.4549	56.7497	38.5924	25.8624	35.9693	29.9598	1.2266	5.8414e-16	1.8627e-14	Isg15	chr4	-	156199424	156200818	756	protein_coding	ISG15_ubiquitin-like_modifier	103	143	161	72	107	103	85	34	24	58	33	27	30	30	6.77731	7.71655	8.57805	4.49539	8.05125	6.07657	4.3003	1.84567	1.52466	3.32623
ENSMUSG00000025885	1892.31	1864.04	1783.6	1923.03	1885.63	1893.18	1639.55	694.447	702.158	678.061	771.848	731.809	1015.53	759.981	1.2216	3.2917e-71	9.6109e-69	Myo5b	chr18	+	74440936	74771493	6745	protein_coding	myosin_VB	1810	2158	2095	1909	1560	1984	2059	756	637	693	660	764	847	761	13.3487	13.052	12.5108	13.3592	13.1566	13.1191	11.6755	4.59978	4.53568	4.45448
ENSMUSG00000021557	12517.5	11580.7	11254.1	12281.6	10624.8	11595.7	11135.2	4655.37	5154.3	4995.93	5170.21	5006.76	4883.44	4585.85	1.2184	1.4711e-204	2.749e-201	Agtpbp1	chr13	-	59449537	59585227	4601	protein_coding	ATP/GTP_binding_protein_1	11973	13407	13219	12192	8790	12152	13984	5068	4676	5106	4421	5227	4073	4592	129.447	118.874	115.726	125.078	108.677	117.798	116.247	45.2045	48.8098	48.1143
ENSMUSG00000037405	32.4098	71.6938	51.0817	53.3896	44.7232	38.169	47.777	20.2088	13.2275	16.6335	14.0336	13.4101	19.1836	6.99063	1.2167	1.1241e-13	3.0223e-12	Icam1	chr9	+	21015960	21028797	2540	protein_coding	intercellular_adhesion_molecule_1	31	83	60	53	37	40	60	22	12	17	12	14	16	7	0.607113	1.33307	0.951485	0.984915	0.828647	0.702376	0.903482	0.355456	0.226899	0.290176
ENSMUSG00000095288	44.9555	21.5945	14.4731	20.147	35.0533	41.0317	27.8699	11.023	1.10229	6.8491	4.67787	5.74719	1.19898	0.998661	1.2161	2.3273e-11	4.8987e-10	Gm7618	chr6	-	148900968	148901138	171	pseudogene	predicted_pseudogene_7618	43	25	17	20	29	43	35	12	1	7	4	6	1	1	12.5088	5.96421	4.0044	5.52065	9.64724	11.2154	7.82842	2.87993	0.280859	1.77479
ENSMUSG00000029298	209.095	158.072	148.988	119.875	171.64	95.4225	138.553	61.5449	71.6487	53.8143	56.1344	46.9354	46.7601	44.9397	1.213	8.3612e-20	3.4952e-18	Gbp9	chr5	-	105078394	105139539	3633	protein_coding	guanylate-binding_protein_9	200	183	175	119	142	100	174	67	65	55	48	49	39	45	2.73846	2.05492	1.94025	1.5461	2.22343	1.22766	1.83183	0.756844	0.859275	0.656361
ENSMUSG00000028874	32.4098	23.3221	20.4327	20.147	14.5048	20.0387	26.2774	6.43007	1.10229	1.95689	5.84734	4.78933	2.39796	8.98795	1.2129	1.9539e-11	4.1583e-10	Fgr	chr4	+	132974095	133001910	3363	protein_coding	Gardner-Rasheed_feline_sarcoma_viral_(Fgr)_oncogene_homolog	31	27	24	20	12	21	33	7	1	2	5	5	2	9	0.458539	0.327526	0.287454	0.280711	0.202981	0.278507	0.375309	0.0854217	0.014281	0.0257839
ENSMUSG00000025321	1201.25	1530.62	1712.09	1269.26	1252.25	1401.76	1259.72	519.917	532.405	575.324	609.292	591.961	597.091	604.19	1.2075	2.8597e-64	6.597e-62	Itgb8	chr12	-	119158022	119238802	8403	protein_coding	integrin_beta_8	1149	1772	2011	1260	1036	1469	1582	566	483	588	521	618	498	605	6.80186	8.60277	9.63967	7.07771	7.01337	7.79706	7.20069	2.76426	2.76056	3.03381
ENSMUSG00000030579	77.3652	79.4678	76.6225	47.3455	82.194	83.0176	68.4804	18.3716	28.6595	26.4179	22.2199	15.3258	40.7652	28.9612	1.2002	4.4211e-16	1.4268e-14	Tyrobp	chr7	+	30413788	30417577	564	protein_coding	TYRO_protein_tyrosine_kinase_binding_protein	74	92	90	47	68	87	86	20	26	27	19	16	34	29	6.52671	6.65453	6.42759	3.93347	6.85853	6.87992	5.83205	1.45528	2.21401	2.07554
ENSMUSG00000003872	330.37	302.323	269.03	264.933	284.053	243.327	271.533	131.357	110.229	115.456	101.744	106.323	121.097	125.831	1.1988	5.7508e-46	8.1409e-44	Lin7b	chr7	-	45367891	45370583	735	protein_coding	lin-7_homolog_B_(C._elegans)	316	350	316	263	235	255	341	143	100	118	87	111	101	126	21.3866	19.4263	17.3175	16.8898	18.1879	15.4738	17.7447	7.98446	6.53427	6.9605
ENSMUSG00000021876	89.9109	118.338	111.528	94.691	82.194	95.4225	117.85	34.9061	37.4778	37.1808	44.4398	34.4832	43.1632	44.9397	1.1986	4.2836e-23	2.1459e-21	Rnase4	chr14	+	51091077	51106151	1819	protein_coding	ribonuclease_RNase_A_family_4	86	137	131	94	68	100	148	38	34	38	38	36	36	45	2.35184	3.07253	2.90084	2.43922	2.12656	2.45194	3.11194	0.85733	0.897699	0.905726
ENSMUSG00000026589	69.0014	68.2387	42.5681	49.3602	25.3834	55.3451	53.351	18.3716	6.61373	25.4395	15.2031	7.66292	16.7857	12.9826	1.1961	3.0145e-12	6.9974e-11	Sec16b	chr1	+	157506728	157568425	4664	protein_coding	SEC16_homolog_B_(S._cerevisiae)	66	79	50	49	21	58	67	20	6	26	13	8	14	13	0.703926	0.690999	0.431813	0.4959	0.256131	0.554642	0.549438	0.175982	0.0617842	0.241691
ENSMUSG00000030341	558.284	481.989	497.195	467.411	491.955	470.433	455.474	202.088	184.082	235.805	252.605	142.722	214.617	192.742	1.1927	2.5782e-44	3.4411e-42	Tnfrsf1a	chr6	+	125349362	125362484	2156	protein_coding	tumor_necrosis_factor_receptor_superfamily_member_1a	534	558	584	464	407	493	572	220	167	241	216	149	179	193	12.3207	10.5583	10.9106	10.1584	10.7386	10.1986	10.1473	4.18766	3.72008	4.84634
ENSMUSG00000026923	1846.31	1737.06	1357.07	1663.14	1455.32	1524.85	1782.08	632.902	713.181	613.483	742.612	764.377	663.035	699.063	1.1915	1.7471e-69	4.7314e-67	Notch1	chr2	-	26457903	26516663	9488	protein_coding	notch_1	1766	2011	1594	1651	1204	1598	2238	689	647	627	635	798	553	700	9.25887	8.64662	6.76703	8.21351	7.2186	7.51182	9.02168	2.98017	3.27502	2.86509
ENSMUSG00000021423	128.594	91.5607	103.015	104.765	70.1067	81.1091	82.8135	26.6388	35.2732	36.2024	45.6092	28.736	31.1734	42.9424	1.189	1.819e-18	7.0374e-17	Ly86	chr13	+	37345345	37419036	997	protein_coding	lymphocyte_antigen_86	123	106	121	104	58	85	104	29	32	37	39	30	26	43	6.13694	4.3373	4.88849	4.92374	3.30929	3.80248	3.9897	1.19371	1.54148	1.60899
ENSMUSG00000089993	18.8186	16.4118	14.4731	15.1103	12.0874	39.1232	20.7034	0.918581	4.40915	1.95689	7.0168	0	1.19898	0.998661	1.1855	5.2333e-11	1.0504e-09	Gm5822	chr19	-	28862330	28863707	1378	pseudogene	predicted_gene_5822	18	19	17	15	10	41	26	1	4	2	6	0	1	1	0.649778	0.562488	0.496917	0.513805	0.412812	1.32702	0.721649	0.0297816	0.13941	0.0629255
ENSMUSG00000055172	79.4562	74.2851	68.1089	49.3602	66.4805	57.2535	43.7956	24.8017	29.7618	21.5257	26.8977	18.1994	16.7857	16.9772	1.1684	6.5713e-15	1.9741e-13	C1ra	chr6	+	124512632	124523440	2751	protein_coding	complement_component_1_r_subcomponent_A	76	86	80	49	55	60	55	27	27	22	23	19	14	17	1.37425	1.27531	1.17134	0.840741	1.1373	0.972756	0.76467	0.402782	0.471365	0.346719
ENSMUSG00000048108	13.5912	22.4583	41.7167	31.2279	15.7136	24.8099	19.1108	3.67432	5.51144	7.82754	5.84734	4.78933	2.39796	5.99197	1.1612	1.4421e-10	2.7413e-09	Tmem72	chr6	-	116692630	116716913	3585	protein_coding	transmembrane_protein_72	13	26	49	31	13	26	24	4	5	8	5	5	2	6	0.180383	0.295865	0.550543	0.408159	0.206279	0.323465	0.25605	0.0457897	0.0669831	0.096749
ENSMUSG00000020641	103.502	82.0591	83.4334	58.4264	101.534	67.75	64.499	27.5574	20.9435	21.5257	30.4061	29.6938	40.7652	34.9531	1.1595	9.2014e-16	2.9043e-14	Rsad2	chr12	-	26442753	26456452	4189	protein_coding	radical_S-adenosyl_methionine_domain_containing_2	99	95	98	58	84	71	81	30	19	22	26	31	34	35	1.17562	0.925171	0.942324	0.653543	1.1407	0.755947	0.739566	0.293906	0.217835	0.227697
ENSMUSG00000042784	36.5917	47.5079	49.3789	35.2573	47.1407	22.9014	52.5547	10.1044	13.2275	17.612	15.2031	4.78933	17.9847	9.98661	1.1551	1.1245e-11	2.4433e-10	Muc1	chr3	+	89229057	89233381	2242	protein_coding	mucin_1_transmembrane	35	55	58	35	39	24	66	11	12	18	13	5	15	10	0.776559	1.00077	1.04202	0.736867	0.989533	0.47744	1.12593	0.201351	0.257057	0.348083
ENSMUSG00000023992	96.1838	85.5143	49.3789	71.5219	85.8202	92.5598	77.2395	24.8017	24.2503	30.3317	17.542	27.7781	41.9642	36.9505	1.1531	3.2158e-15	9.8672e-14	Trem2	chr17	+	48346401	48354147	4784	protein_coding	triggering_receptor_expressed_on_myeloid_cells_2	92	99	58	71	71	97	97	27	22	31	15	29	35	37	0.956618	0.844215	0.488339	0.700525	0.844245	0.904324	0.775501	0.231617	0.220859	0.280942
ENSMUSG00000034422	293.779	339.466	293.72	293.139	358.994	303.444	346.384	144.217	127.865	140.896	180.098	106.323	130.689	130.825	1.1408	1.9452e-38	2.089e-36	Parp14	chr16	-	35832874	35871544	7417	protein_coding	poly_(ADP-ribose)_polymerase_family_member_14	281	393	345	291	297	318	435	157	116	144	154	111	109	131	1.8846	2.16159	1.87359	1.85192	2.27787	1.91224	2.24317	0.868697	0.751128	0.841744
ENSMUSG00000038068	2262.41	2407.36	2246.74	2440.81	2091.11	2325.45	1893.56	1046.26	955.684	879.62	1071.23	1036.41	999.947	978.688	1.1405	1.6539e-91	7.0237e-89	Rnf144b	chr13	+	47122720	47247991	4576	protein_coding	ring_finger_protein_144B	2164	2787	2639	2423	1730	2437	2378	1139	867	899	916	1082	834	980	23.5241	24.8462	23.2294	24.9933	21.5061	23.7527	19.8759	10.2149	9.0995	8.51764
ENSMUSG00000073411	2198.64	2123.17	2326.77	2023.77	2234.95	2218.57	1817.92	980.126	873.012	1060.63	1064.22	901.351	893.238	878.822	1.1357	1.3009e-82	4.8618e-80	H2-D1	chr17	+	35262730	35267499	2102	protein_coding	histocompatibility_2_D_region_locus_1	2103	2458	2733	2009	1849	2325	2283	1067	792	1084	910	941	745	880	49.7678	47.7044	52.3711	45.1132	50.0386	49.3326	41.5408	20.8319	18.0958	22.3585
ENSMUSG00000060550	94.0928	116.61	75.7711	65.4778	83.4028	79.2007	100.332	22.9645	38.5801	38.1593	49.1176	30.6517	20.3826	33.9545	1.1298	3.1109e-15	9.5609e-14	H2-Q7	chr17	+	35439155	35443773	4209	protein_coding	histocompatibility_2_Q_region_locus_7	90	135	89	65	69	83	126	25	35	39	42	32	17	34	1.06367	1.30847	0.851718	0.728939	0.932549	0.879513	1.14497	0.243758	0.399368	0.401727
ENSMUSG00000029605	36.5917	42.3252	32.3517	37.272	33.8446	29.581	42.9993	19.2902	4.40915	17.612	10.5252	9.57865	11.9898	7.98929	1.1205	2.2573e-11	4.766e-10	Oas1b	chr5	+	120812635	120824163	1837	polymorphic_pseudogene	2'-5'_oligoadenylate_synthetase_1B	35	49	38	37	28	31	54	21	4	18	9	10	10	8	0.947765	1.08817	0.833219	0.950712	0.867062	0.752655	1.12431	0.469145	0.104577	0.424824
ENSMUSG00000052142	41.819	25.9134	25.5408	29.2132	18.131	24.8099	15.9257	5.51149	7.71602	4.89221	7.0168	10.5365	7.19387	4.99331	1.1204	3.1427e-10	5.8028e-09	Rasal3	chr17	-	32390659	32403583	3849	protein_coding	RAS_protein_activator_like_3	40	30	30	29	15	26	20	6	7	5	6	11	6	5	0.516956	0.317967	0.313948	0.355637	0.221689	0.301279	0.198739	0.0639735	0.0873443	0.0563207
ENSMUSG00000073409	115.002	120.065	97.9065	82.6028	90.6552	117.37	73.2581	50.522	41.887	38.1593	38.5924	39.2725	40.7652	28.9612	1.1196	9.7192e-18	3.5963e-16	H2-Q6	chr17	+	35424850	35430055	2085	protein_coding	histocompatibility_2_Q_region_locus_6	110	139	115	82	75	123	92	55	38	39	33	41	34	29	2.62439	2.71968	2.22165	1.85637	2.04624	2.63113	1.68766	1.08256	0.87531	0.810969
ENSMUSG00000041515	115.002	95.0158	112.38	105.772	88.2377	109.736	82.8135	43.1733	31.9664	33.267	39.7619	43.1039	27.5765	62.9156	1.1182	1.2127e-17	4.4697e-16	Irf8	chr8	+	120736358	120756694	3469	protein_coding	interferon_regulatory_factor_8	110	110	132	105	73	115	104	47	29	34	34	45	23	63	1.57736	1.29359	1.53269	1.4287	1.19707	1.47855	1.14665	0.55602	0.401493	0.424933
ENSMUSG00000068196	207.004	323.054	532.101	348.544	331.194	377.873	250.829	84.5094	98.1037	133.068	170.742	86.2079	146.275	88.8808	1.1167	8.2617e-12	1.8184e-10	Col8a1	chr16	-	57624258	57754737	5108	protein_coding	collagen_type_VIII_alpha_1	198	374	625	346	274	396	315	92	89	136	146	90	122	89	1.92822	2.98696	4.92849	3.19729	3.05141	3.4577	2.35864	0.739152	0.836804	1.15434
ENSMUSG00000033355	79.4562	89.8332	65.5548	62.4558	68.8979	60.1162	46.9808	24.8017	11.0229	33.267	18.7115	15.3258	39.5663	22.9692	1.1166	2.4261e-12	5.6809e-11	Rtp4	chr16	+	23609919	23614222	1573	protein_coding	receptor_transporter_protein_4	76	104	77	62	57	63	59	27	10	34	16	16	33	23	2.4034	2.6972	1.97173	1.86046	2.06133	1.7863	1.43458	0.704421	0.30532	0.937122
ENSMUSG00000026830	48.0919	48.3717	103.015	53.3896	55.6018	53.4366	39.8142	22.0459	15.432	16.6335	24.5588	19.1573	22.7806	16.9772	1.1157	6.7046e-12	1.4897e-10	Ermn	chr2	-	58045113	58052864	3635	protein_coding	ermin_ERM-like_protein	46	56	121	53	46	56	50	24	14	17	21	20	19	17	0.629499	0.628481	1.3408	0.688221	0.719871	0.687111	0.526099	0.270959	0.184973	0.202764
ENSMUSG00000029826	189.231	199.533	150.691	162.184	180.102	150.768	154.479	72.5679	76.0579	90.9952	60.8123	64.177	63.5458	79.8929	1.1087	7.6811e-27	4.9322e-25	Zc3hav1	chr6	-	38305286	38354603	4944	protein_coding	zinc_finger_CCCH_type_antiviral_1	181	231	177	161	149	158	194	79	69	93	52	67	53	80	1.82113	1.90609	1.44205	1.53711	1.71439	1.42535	1.50081	0.655761	0.670278	0.815549
ENSMUSG00000002588	24.0459	72.5576	153.245	84.6175	68.8979	84.926	59.7213	9.18581	11.0229	15.6551	25.7283	2.8736	14.3877	9.98661	1.1009	1.148e-09	1.9627e-08	Pon1	chr6	-	5168090	5193946	1544	protein_coding	paraoxonase_1	23	84	180	84	57	89	75	10	10	16	22	3	12	10	0.741007	2.21943	4.6958	2.56796	2.10005	2.57091	1.85787	0.265797	0.311055	0.449281
ENSMUSG00000097177	272.869	298.868	241.787	274	203.068	295.81	209.423	108.393	121.252	104.693	104.083	113.986	91.1223	136.817	1.1005	6.4147e-28	4.3117e-26	9330159M07Rik	chr9	-	88840236	88858870	3164	lincRNA	RIKEN_cDNA_9330159M07_gene	261	346	284	272	168	310	263	118	110	107	89	119	76	137	4.10342	4.46117	3.61548	4.05779	3.02047	4.36987	3.17923	1.53053	1.66971	1.4662
ENSMUSG00000067399	77.3652	59.6009	69.8116	76.5587	54.3931	64.8873	62.9064	31.2318	28.6595	20.5473	33.9145	25.8624	19.1836	25.9652	1.0997	7.5877e-16	2.4072e-14	Trim43c	chr9	+	88839164	88848190	1990	protein_coding	tripartite_motif-containing_43C	74	69	82	76	45	68	79	34	26	21	29	27	16	26	1.84978	1.41451	1.65976	1.80267	1.28635	1.52405	1.51836	0.701169	0.627487	0.457522
ENSMUSG00000047237	59.5921	50.963	41.7167	37.272	29.0097	39.1232	46.1845	11.023	23.1481	19.5689	10.5252	18.1994	13.1888	9.98661	1.0911	2.328e-11	4.8987e-10	Fbxw21	chr9	-	109139454	109162041	2242	protein_coding	F-box_and_WD-40_domain_protein_21	57	59	49	37	24	41	58	12	21	20	9	19	11	10	1.26468	1.07356	0.880329	0.778974	0.608943	0.815627	0.989451	0.219656	0.44985	0.386759
ENSMUSG00000028174	86.7745	150.298	392.477	161.176	201.859	210.884	135.368	17.453	14.3297	35.2239	60.8123	17.2416	61.1479	25.9652	1.0876	1.9032e-09	3.1472e-08	Rpe65	chr3	+	159599233	159624799	1602	protein_coding	retinal_pigment_epithelium_65	83	174	461	160	167	221	170	19	13	36	52	18	51	26	2.57725	4.43094	11.5911	4.71427	5.93001	6.1528	4.05871	0.48673	0.389731	0.974284
ENSMUSG00000085573	27.1824	20.7307	21.284	18.1323	14.5048	23.8556	19.1108	6.43007	4.40915	3.91377	4.67787	3.83146	10.7908	4.99331	1.0873	1.2345e-09	2.1029e-08	Gm15418	chr8	+	11187755	11204503	677	antisense	predicted_gene_15418	26	24	25	18	12	25	24	7	4	4	4	4	9	5	1.91041	1.44621	1.48743	1.25499	1.00831	1.647	1.35589	0.424333	0.283763	0.256163
ENSMUSG00000028581	231.05	192.623	253.706	225.647	228.451	226.151	194.293	120.334	88.1831	123.284	99.4047	68.0084	91.1223	87.8822	1.0839	1.2609e-25	7.4797e-24	Laptm5	chr4	+	130913125	130936141	2600	protein_coding	lysosomal-associated_protein_transmembrane_5	221	223	298	224	189	237	244	131	80	126	85	71	76	88	4.22825	3.49897	4.61666	4.0666	4.13514	4.06554	3.58937	2.06774	1.47775	2.10108
ENSMUSG00000063558	123.366	88.9694	94.5011	85.6249	56.8106	93.5141	121.831	55.1149	34.1709	30.3317	44.4398	36.3989	32.3724	30.9585	1.0755	6.5659e-14	1.8043e-12	Aox1	chr1	+	58029931	58106413	6429	protein_coding	aldehyde_oxidase_1	118	103	111	85	47	98	153	60	31	31	38	38	27	31	0.91302	0.653586	0.695447	0.624068	0.415868	0.67987	0.910228	0.383005	0.231581	0.209057
ENSMUSG00000041498	192.368	127.84	155.799	139.014	132.961	129.775	132.183	56.952	90.3877	48.9221	57.3039	63.2191	38.3673	68.9076	1.0747	1.2429e-17	4.5717e-16	Kif14	chr1	+	136466343	136531511	8770	protein_coding	kinesin_family_member_14	184	148	183	138	110	136	166	62	82	50	49	66	32	69	1.04366	0.688448	0.840497	0.742739	0.713501	0.691644	0.723953	0.290128	0.449054	0.247182
ENSMUSG00000022491	29.2733	41.4615	24.6895	30.2205	29.0097	45.8028	21.4997	0.918581	0	1.95689	5.84734	3.83146	20.3826	1.99732	1.0733	2.6323e-09	4.2475e-08	Glycam1	chr15	-	103562762	103565078	625	protein_coding	glycosylation_dependent_cell_adhesion_molecule_1	28	48	29	30	24	48	27	1	0	2	5	4	17	2	2.22854	3.13307	1.86897	2.26568	2.1844	3.42535	1.65229	0.0656624	0	0.138738
ENSMUSG00000030786	136.957	149.434	114.082	115.845	112.412	126.912	125.017	56.0334	44.0915	51.8575	64.3207	52.6826	61.1479	57.9223	1.0721	2.219e-23	1.1329e-21	Itgam	chr7	+	128062640	128128160	4803	protein_coding	integrin_alpha_M	131	173	134	115	93	133	157	61	40	53	55	55	51	58	1.35675	1.46941	1.12377	1.13017	1.10147	1.23504	1.25023	0.521212	0.399974	0.47842
ENSMUSG00000021804	280.188	558.002	1103.36	727.308	586.237	705.172	429.197	100.125	95.8991	178.077	244.419	85.25	252.984	134.819	1.0718	3.3899e-09	5.4002e-08	Rgr	chr14	-	37037490	37048964	1659	protein_coding	retinal_G_protein_coupled_receptor	268	646	1296	722	485	739	539	109	87	182	209	89	211	135	8.03582	15.8853	31.4661	20.5422	16.6302	19.8674	12.4264	2.69636	2.51859	4.75632
ENSMUSG00000025185	171.458	174.484	155.799	152.11	137.796	192.753	181.553	67.975	69.4442	78.2754	70.168	68.0084	65.9438	97.8688	1.0702	1.5504e-25	9.1101e-24	Loxl4	chr19	-	42593982	42612813	3738	protein_coding	lysyl_oxidase-like_4	164	202	183	151	114	202	228	74	63	80	60	71	55	98	2.18246	2.20456	1.97195	1.90675	1.73487	2.41021	2.33291	0.812437	0.809442	0.92789
ENSMUSG00000040613	80.5016	75.1489	45.9735	57.419	55.6018	58.2077	54.9436	24.8017	26.4549	10.7629	25.7283	24.9045	25.1785	28.9612	1.0614	1.4442e-12	3.4776e-11	Apobec1	chr6	-	122577792	122602444	2265	protein_coding	apolipoprotein_B_mRNA_editing_enzyme_catalytic_polypeptide_1	77	87	54	57	46	61	69	27	24	11	22	26	21	29	1.69108	1.56697	0.960307	1.18785	1.15529	1.20117	1.16515	0.489207	0.508894	0.210557
ENSMUSG00000004609	36.5917	35.415	29.7976	21.1544	37.4708	33.3979	39.0179	13.7787	7.71602	12.7198	16.3725	11.4944	11.9898	6.99063	1.0573	2.1099e-10	3.9624e-09	Cd33	chr7	-	43527456	43533171	2571	protein_coding	CD33_antigen	35	41	35	21	31	35	49	15	7	13	14	12	10	7	0.677186	0.650565	0.548341	0.385544	0.6859	0.607169	0.728947	0.239434	0.130762	0.219223
ENSMUSG00000052160	79.4562	65.6473	81.7307	80.5881	73.7329	78.2465	71.6656	25.7203	20.9435	45.0084	47.9482	24.9045	27.5765	26.9638	1.0553	2.0563e-14	5.8574e-13	Pld4	chr12	+	112760655	112768986	1978	protein_coding	phospholipase_D_family_member_4	76	76	96	80	61	82	90	28	19	46	41	26	23	27	1.9113	1.56746	1.95492	1.90906	1.7543	1.84897	1.74028	0.580937	0.46133	1.00827
ENSMUSG00000046410	26.1369	41.4615	27.2436	23.1691	27.8009	39.1232	23.0922	11.9416	6.61373	14.6766	5.84734	9.57865	10.7908	6.99063	1.0539	1.0946e-09	1.8799e-08	Kcnk6	chr7	-	29221928	29232522	4089	protein_coding	potassium_inwardly-rectifying_channel_subfamily_K_member_6	25	48	32	23	23	41	29	13	6	15	5	10	9	7	0.304134	0.478887	0.315223	0.265502	0.319972	0.447209	0.271258	0.130474	0.0704723	0.159045
ENSMUSG00000002111	26.1369	34.5512	34.0544	45.3308	21.7572	23.8556	26.2774	11.023	6.61373	7.82754	8.18627	5.74719	5.99489	18.9746	1.0534	2.087e-09	3.4268e-08	Spi1	chr2	+	91082390	91115756	2034	protein_coding	spleen_focus_forming_virus_(SFFV)_proviral_integration_oncogene	25	40	40	45	18	25	33	12	6	8	7	6	5	19	0.611408	0.802265	0.792125	1.04428	0.503411	0.548192	0.620533	0.242118	0.141672	0.170524
ENSMUSG00000029762	56.4557	50.0993	30.649	32.2352	41.097	42.9401	50.1659	22.9645	14.3297	21.5257	11.6947	10.5365	17.9847	7.98929	1.0513	2.0999e-10	3.9476e-09	Akr1b8	chr6	+	34354119	34368463	1358	protein_coding	aldo-keto_reductase_family_1_member_B8	54	58	36	32	34	45	63	25	13	22	10	11	15	8	1.97804	1.74236	1.06779	1.11226	1.42423	1.47794	1.77436	0.755505	0.459757	0.702374
ENSMUSG00000048163	128.594	112.291	143.88	125.919	136.587	150.768	128.202	56.952	47.3984	68.491	64.3207	55.5562	70.7397	51.9304	1.0495	5.9202e-23	2.95e-21	Selplg	chr5	-	113817798	113830501	2604	protein_coding	selectin_platelet_(p-selectin)_ligand	123	130	169	125	113	158	161	62	43	70	55	58	59	52	2.34966	2.03663	2.61415	2.26582	2.46853	2.7062	2.36476	0.97712	0.793071	1.16547
ENSMUSG00000074896	601.149	598.6	580.628	504.683	548.766	488.563	505.64	250.773	224.867	309.188	327.451	208.815	238.597	207.722	1.0448	9.0517e-32	7.4511e-30	Ifit3	chr19	+	34583531	34588731	1745	protein_coding	interferon-induced_protein_with_tetratricopeptide_repeats_3	575	693	682	501	454	512	635	273	204	316	280	218	199	208	16.3913	16.2012	15.7425	13.5519	14.8	13.0863	13.9181	6.42043	5.6146	7.85122
ENSMUSG00000052776	20.9095	25.9134	21.284	12.0882	21.7572	16.2218	27.0737	3.67432	2.20458	1.95689	9.35574	0.957865	11.9898	1.99732	1.0376	1.1807e-08	1.7305e-07	Oas1a	chr5	-	120896256	120907521	1885	protein_coding	2'-5'_oligoadenylate_synthetase_1A	20	30	25	12	18	17	34	4	2	2	8	1	10	2	0.527789	0.64926	0.534211	0.300488	0.543203	0.402236	0.689874	0.0870855	0.0509569	0.0460007
ENSMUSG00000054675	90.9564	100.199	112.38	102.75	131.752	121.187	67.6841	50.522	51.8076	40.1161	40.9314	49.809	37.1683	38.9478	1.036	1.8759e-15	5.8229e-14	Tmem119	chr5	-	113793729	113800516	2242	protein_coding	transmembrane_protein_119	87	116	132	102	109	127	85	55	47	41	35	52	31	39	1.9303	2.11072	2.3715	2.14744	2.76562	2.52645	1.45006	1.00676	1.00681	0.792855
ENSMUSG00000059336	580.239	605.51	654.697	577.212	580.193	657.461	606.768	271.9	276.674	295.49	275.994	277.781	268.571	362.514	1.0351	5.7309e-57	1.1392e-54	Slc14a1	chr18	-	78100091	78142119	3665	protein_coding	solute_carrier_family_14_(urea_transporter)_member_1	555	701	769	573	480	689	762	296	251	302	236	290	224	363	7.53288	7.80284	8.45156	7.37968	7.45021	8.38472	7.95212	3.31447	3.28915	3.57255
ENSMUSG00000024338	33.4552	41.4615	45.1221	25.1838	31.4271	50.5739	29.4625	17.453	12.1252	11.7413	9.35574	10.5365	8.39284	19.9732	1.0302	8.9749e-10	1.56e-08	Psmb8	chr17	+	34197721	34201454	1907	protein_coding	proteasome_(prosome_macropain)_subunit_beta_type_8_(large_multifunctional_peptidase_7)	32	48	53	25	26	53	37	19	11	12	8	11	7	20	0.83472	1.02683	1.11946	0.618794	0.775575	1.23956	0.742084	0.408884	0.27703	0.27282
ENSMUSG00000056501	79.4562	122.657	91.947	118.867	146.257	105.919	116.257	63.3821	39.6824	62.6203	46.7787	45.9775	38.3673	35.9518	1.0251	1.3362e-14	3.865e-13	Cebpb	chr2	+	167688915	167690418	1504	protein_coding	CCAAT/enhancer_binding_protein_(C/EBP)_beta	76	142	108	118	121	111	146	69	36	64	40	48	32	36	2.51367	3.85167	2.89241	3.70332	4.57656	3.29169	3.71285	1.88277	1.14958	1.84492
ENSMUSG00000046805	331.416	315.28	333.734	317.316	310.645	355.926	328.069	162.589	125.661	184.926	184.776	106.323	148.673	161.783	1.0227	5.4302e-30	4.0587e-28	Mpeg1	chr19	+	12460779	12465284	4335	protein_coding	macrophage_expressed_gene_1	317	365	392	315	257	373	412	177	114	189	158	111	124	162	3.63757	3.43489	3.64235	3.42987	3.37245	3.83763	3.63505	1.67564	1.26299	1.89025
ENSMUSG00000034957	101.411	86.378	137.069	79.5808	118.456	114.507	92.3689	32.1503	41.887	47.9437	59.6428	32.5674	38.3673	58.921	1.0205	8.4291e-14	2.2927e-12	Cebpa	chr7	+	35119293	35121926	2634	protein_coding	CCAAT/enhancer_binding_protein_(C/EBP)_alpha	97	100	161	79	98	120	116	35	38	49	51	34	32	59	1.83188	1.54879	2.46204	1.41569	2.11647	2.03193	1.6844	0.545317	0.692871	0.80654
ENSMUSG00000026656	42.8645	50.0993	30.649	21.1544	30.2184	35.3063	31.8514	11.023	13.2275	20.5473	11.6947	6.70506	8.39284	10.9853	1.0193	2.8483e-09	4.5724e-08	Fcgr2b	chr1	-	170960558	170976547	2250	protein_coding	Fc_receptor_IgG_low_affinity_IIb	41	58	36	21	25	37	40	12	12	21	10	7	7	11	0.906448	1.05161	0.644473	0.440548	0.632061	0.733437	0.679954	0.218875	0.256143	0.404653
ENSMUSG00000048416	293.779	355.014	303.085	267.955	276.8	306.306	274.718	139.624	143.297	167.314	135.658	130.27	153.469	114.846	1.0186	1.9025e-33	1.6929e-31	Mlf1	chr3	+	67374097	67400003	1114	protein_coding	myeloid_leukemia_factor_1	281	411	356	266	229	321	345	152	130	171	116	136	128	115	12.5477	15.051	12.8721	11.2708	11.6937	12.8518	11.845	5.59958	5.60457	6.65513
ENSMUSG00000025588	59.5921	76.0127	68.9602	47.3455	50.7669	48.6655	60.5176	22.0459	27.5572	30.3317	24.5588	22.9888	28.7755	17.9759	1.0077	2.4624e-12	5.7515e-11	Nat1	chr8	+	67490758	67492104	1347	protein_coding	N-acetyl_transferase_1	57	88	81	47	42	51	76	24	25	31	21	24	24	18	2.10499	2.66516	2.42216	1.64697	1.77371	1.68867	2.15798	0.731208	0.891368	0.997792
ENSMUSG00000026547	256.142	259.998	309.044	234.713	292.514	265.275	246.848	116.66	110.229	136.004	128.641	98.6601	184.643	92.8755	1.0038	4.9061e-21	2.2091e-19	Tagln2	chr1	+	172500047	172507380	1586	protein_coding	transgelin_2	245	301	363	233	242	278	310	127	100	139	110	103	154	93	7.68431	7.74234	9.21909	6.93441	8.67988	7.81781	7.47585	3.28623	3.02818	3.79977
ENSMUSG00000027803	1027.7	1098.73	1068.46	1051.67	958.527	1008.62	876.709	451.023	544.53	510.747	541.463	472.228	514.361	456.388	0.99729	1.681e-64	3.9762e-62	Wwtr1	chr3	-	57455649	57575910	4697	protein_coding	WW_domain_containing_transcription_regulator_1	983	1272	1255	1044	793	1057	1101	491	494	522	463	493	429	457	10.4106	11.0478	10.7624	10.4915	9.60404	10.0369	8.96538	4.29001	5.05116	4.81832
ENSMUSG00000030789	9.40928	25.0496	5.95953	17.125	8.46115	17.1761	11.9443	3.67432	0	1.95689	1.16947	0	1.19898	2.99598	0.99726	1.6625e-08	2.3915e-07	Itgax	chr7	+	128129547	128150656	4045	protein_coding	integrin_alpha_X	9	29	7	17	7	18	15	4	0	2	1	0	1	3	0.110679	0.292475	0.069705	0.198375	0.0984421	0.198471	0.141832	0.0405825	0	0.0214367
ENSMUSG00000026896	245.687	253.951	224.759	195.426	251.417	228.06	215.793	121.253	115.74	104.693	121.625	92.9129	107.908	111.85	0.99516	2.6751e-31	2.1453e-29	Ifih1	chr2	-	62595798	62646255	5470	protein_coding	interferon_induced_with_helicase_C_domain_1	235	294	264	194	208	239	271	132	105	107	104	97	90	112	2.13709	2.19265	1.94402	1.67406	2.1631	1.94874	1.89489	0.990338	0.921906	0.84809
ENSMUSG00000005087	603.24	602.055	604.466	620.528	554.81	568.718	590.046	207.599	202.821	189.818	189.454	227.014	479.591	223.7	0.99479	3.1397e-11	6.4899e-10	Cd44	chr2	-	102811141	102901665	5614	protein_coding	CD44_antigen	577	697	710	616	459	596	741	226	184	194	162	237	400	224	5.11264	5.06488	5.09414	5.17923	4.65095	4.73497	5.04833	1.65209	1.57409	1.49822
ENSMUSG00000102060	33.4552	41.4615	27.2436	26.1911	24.1747	27.6725	35.8328	11.9416	23.1481	7.82754	5.84734	7.66292	10.7908	5.99197	0.99318	1.2703e-08	1.8545e-07	RP24-166N8.2	chr9	+	110986201	110987804	1067	antisense	RIKEN_cDNA_1700061E17_gene	32	48	32	26	20	29	45	13	21	8	5	8	9	6	1.49186	1.83521	1.20801	1.15018	1.06627	1.21221	1.61306	0.500007	0.945234	0.325066
ENSMUSG00000024621	438.054	474.215	555.087	512.742	464.154	544.863	449.9	240.668	130.07	260.266	286.519	170.5	281.76	227.695	0.99031	9.6463e-19	3.7947e-17	Csf1r	chr18	+	61105572	61132149	4701	protein_coding	colony_stimulating_factor_1_receptor	419	549	652	509	384	571	565	262	118	266	245	178	235	228	4.43369	4.76421	5.58653	5.11074	4.64668	5.41738	4.59685	2.28722	1.20552	2.45322
ENSMUSG00000073489	14.6367	21.5945	14.4731	11.0809	15.7136	17.1761	11.9443	4.5929	1.10229	0.978443	4.67787	5.74719	5.99489	0.998661	0.98993	5.2921e-08	7.1193e-07	Ifi204	chr1	-	173747293	173766876	2253	protein_coding	interferon_activated_gene_204	14	25	17	11	13	18	15	5	1	1	4	6	5	1	0.309107	0.452676	0.303929	0.230456	0.328234	0.356332	0.254643	0.0910764	0.0213169	0.0192435
ENSMUSG00000059498	64.8195	59.6009	81.7307	60.4411	94.2814	84.926	63.7027	39.499	24.2503	33.267	23.3893	27.7781	40.7652	30.9585	0.98627	1.4655e-12	3.5243e-11	Fcgr3	chr1	-	171051174	171064935	1347	protein_coding	Fc_receptor_IgG_low_affinity_III	62	69	96	60	78	89	80	43	22	34	20	29	34	31	2.28963	2.08973	2.8707	2.10252	3.29404	2.9469	2.27156	1.31008	0.784404	1.09435
ENSMUSG00000052837	1112.39	1185.97	973.106	859.271	957.319	858.803	1385.53	721.086	511.462	336.584	408.144	376.441	376.479	449.397	0.98065	4.3002e-12	9.7993e-11	Junb	chr8	-	84976909	84978748	1840	protein_coding	jun_B_proto-oncogene	1064	1373	1143	853	792	900	1740	785	464	344	349	393	314	450	28.7651	30.4412	25.0215	21.882	24.4855	21.8156	36.1687	17.5085	12.1111	8.10562
ENSMUSG00000068129	32.4098	23.3221	30.649	19.1397	19.3398	23.8556	19.9071	3.67432	3.30687	11.7413	10.5252	11.4944	4.79591	7.98929	0.97948	3.5513e-08	4.8897e-07	Cst7	chr2	+	150570415	150578944	986	protein_coding	cystatin_F_(leukocystatin)	31	27	36	19	16	25	25	4	3	12	9	12	4	8	1.56396	1.11711	1.47065	0.909564	0.923091	1.13085	0.969762	0.166487	0.146126	0.527655
ENSMUSG00000066258	152.639	133.022	146.434	143.044	80.9853	109.736	120.239	60.6263	56.2167	57.7281	58.4734	55.5562	73.1376	47.9357	0.97671	9.5667e-16	3.0095e-14	Trim12a	chr7	-	104299894	104315466	3730	protein_coding	tripartite_motif-containing_12A	146	154	172	142	67	115	151	66	51	59	50	58	61	48	1.94709	1.68431	1.85739	1.79695	1.0218	1.37509	1.54835	0.72616	0.656668	0.685786
ENSMUSG00000040253	274.96	313.552	277.544	286.088	296.14	281.496	289.051	139.624	126.763	147.745	139.167	159.964	129.49	150.798	0.97629	3.5106e-41	4.2051e-39	Gbp7	chr3	+	142530338	142550083	5548	protein_coding	guanylate_binding_protein_7	263	363	326	284	245	295	363	152	115	151	119	167	108	151	2.35809	2.66919	2.36682	2.41623	2.51207	2.37153	2.50249	1.12436	0.995511	1.18001
ENSMUSG00000060044	213.277	308.37	293.72	236.728	224.825	281.496	239.681	146.973	117.945	108.607	137.997	115.902	131.888	108.854	0.97493	4.7418e-24	2.5316e-22	Tmem26	chr10	+	68723746	68782654	5052	protein_coding	transmembrane_protein_26	204	357	345	235	186	295	301	160	107	111	118	121	110	109	2.00867	2.88279	2.75068	2.19564	2.09436	2.60437	2.27879	1.29973	1.0172	0.952589
ENSMUSG00000052688	82.5926	68.2387	60.4466	72.5293	43.5145	51.5282	87.5912	25.7203	25.3526	18.5904	38.5924	42.1461	20.3826	20.9719	0.97239	4.3533e-10	7.916e-09	5430435G22Rik	chr1	+	131688695	131715439	4498	protein_coding	RIKEN_cDNA_5430435G22_gene	79	79	71	72	36	54	110	28	23	19	33	44	17	21	0.873674	0.716501	0.635804	0.755561	0.455286	0.535448	0.935352	0.255467	0.24558	0.183139
ENSMUSG00000028583	1727.13	1734.47	1842.35	1675.23	1796.18	1730.96	1610.88	831.316	753.965	910.93	927.387	802.691	951.988	922.763	0.97117	1.8202e-82	6.669e-80	Pdpn	chr4	-	143267431	143299564	1817	protein_coding	podoplanin	1652	2008	2164	1663	1486	1814	2023	905	684	931	793	838	794	924	45.2269	45.0835	47.9719	43.201	46.5227	44.5272	42.5837	20.4405	18.0795	22.2147
ENSMUSG00000030717	304.233	296.277	295.422	309.257	310.645	334.933	321.699	142.38	106.922	149.702	125.133	125.48	2113.8	143.807	0.9711	2.2077e-19	9.0071e-18	Nupr1	chr7	-	126623249	126630861	2449	protein_coding	nuclear_protein_transcription_regulator_1	291	343	347	307	257	351	404	155	97	153	107	131	1763	144	5.9108	5.71366	5.70723	5.91706	5.96961	6.39237	6.3095	2.59741	1.90225	2.70862
ENSMUSG00000012428	48.0919	76.8765	49.3789	66.4852	43.5145	57.2535	46.1845	17.453	13.2275	21.5257	45.6092	12.4523	15.5867	22.9692	0.96974	5.9697e-09	9.1435e-08	Steap4	chr5	+	7960472	7982213	3140	protein_coding	STEAP_family_member_4	46	89	58	66	36	60	58	19	12	22	39	13	13	23	0.728736	1.1563	0.744017	0.992135	0.65219	0.852246	0.706481	0.248325	0.183542	0.303766
ENSMUSG00000031636	598.012	585.643	701.522	696.08	675.683	700.401	602.787	332.526	246.913	361.045	344.993	244.256	386.071	319.572	0.96966	4.854e-30	3.6427e-28	Pdlim3	chr8	+	45885485	45919546	1578	protein_coding	PDZ_and_LIM_domain_3	572	678	824	691	559	734	757	362	224	369	295	255	322	320	18.0315	17.528	21.0332	20.6694	20.1514	20.7459	18.3481	9.41453	6.81751	10.1383
ENSMUSG00000023341	15.6821	26.7772	25.5408	30.2205	26.5922	18.1303	19.1108	5.51149	4.40915	10.7629	5.84734	2.8736	15.5867	1.99732	0.96941	8.3625e-08	1.0935e-06	Mx2	chr16	+	97535308	97560900	2477	polymorphic_pseudogene	MX_dynamin-like_GTPase_2	15	31	30	30	22	19	24	6	4	11	5	3	13	2	0.301236	0.510557	0.487843	0.571679	0.50524	0.342114	0.370585	0.0994082	0.0775565	0.192536
ENSMUSG00000030107	77.3652	89.8332	75.7711	79.5808	100.325	65.8415	82.8135	41.3361	26.4549	42.073	45.6092	24.9045	46.7601	30.9585	0.96732	2.8988e-13	7.4817e-12	Usp18	chr6	+	121245906	121270916	1770	protein_coding	ubiquitin_specific_peptidase_18	74	104	89	79	83	69	104	45	24	43	39	26	39	31	2.0797	2.39701	2.02536	2.10674	2.66751	1.73868	2.24731	1.04336	0.651212	1.05327
ENSMUSG00000079017	9.40928	16.4118	14.4731	18.1323	16.9223	24.8099	19.9071	1.83716	5.51144	6.8491	8.18627	0.957865	1.19898	4.99331	0.96536	1.1251e-07	1.443e-06	Ifi27l2a	chr12	-	103442167	103443680	463	protein_coding	interferon_alpha-inducible_protein_27_like_2A	9	19	17	18	14	26	25	2	5	7	7	1	1	5	0.966948	1.6741	1.47895	1.83505	1.72008	2.50458	2.0652	0.177274	0.518649	0.655485
ENSMUSG00000028709	598.012	610.693	529.547	559.08	568.106	580.169	476.974	287.516	326.277	273.964	260.791	278.739	201.428	307.588	0.96522	5.8456e-35	5.5447e-33	Mob3c	chr4	+	115828092	115836185	2884	protein_coding	MOB_kinase_activator_3C	572	707	622	555	470	608	599	313	296	280	223	291	168	308	9.86603	10.0008	8.6872	9.08352	9.27052	9.40268	7.9439	4.45396	4.92925	4.20929
ENSMUSG00000061536	6043.9	5814.11	5489.58	5934.31	5271.3	6282.62	5794.56	2867.81	2889.1	2845.31	3038.28	3020.15	3045.4	3060.9	0.95786	3.4525e-138	2.4813e-135	Sec22c	chr9	-	121680047	121705490	5656	protein_coding	SEC22_vesicle_trafficking_protein_homolog_C_(S._cerevisiae)	5781	6731	6448	5891	4361	6584	7277	3122	2621	2908	2598	3153	2540	3065	50.8435	48.5489	45.9198	49.1628	43.861	51.9187	49.2091	22.6527	22.2557	22.2911
ENSMUSG00000050271	173.549	190.032	165.164	149.088	166.806	194.662	169.608	87.2652	66.1373	70.4479	93.5574	87.1658	115.102	65.9116	0.95638	7.6181e-20	3.1918e-18	D8Ertd82e	chr8	+	36094828	36147787	4780	protein_coding	DNA_segment_Chr_8_ERATO_Doi_82_expressed	166	220	194	148	138	204	213	95	60	72	80	91	96	66	1.72752	1.8776	1.63478	1.46147	1.6423	1.90347	1.70433	0.815629	0.602848	0.653056
ENSMUSG00000035095	52.2738	56.1457	68.1089	71.5219	73.7329	72.5211	65.2953	18.3716	22.0458	31.3102	38.5924	34.4832	27.5765	33.9545	0.95131	6.6809e-12	1.4862e-10	Fam167a	chr14	+	63436394	63465498	4231	protein_coding	family_with_sequence_similarity_167_member_A	50	65	80	71	61	76	82	20	20	32	33	36	23	34	0.587853	0.626728	0.761608	0.792085	0.82014	0.80115	0.741264	0.193992	0.227024	0.327909
ENSMUSG00000018899	177.731	166.71	175.38	157.147	122.082	189.891	179.96	92.7767	84.8762	60.6634	83.0322	82.3764	64.7448	95.8715	0.95081	7.0267e-19	2.7818e-17	Irf1	chr11	+	53770014	53778374	2137	protein_coding	interferon_regulatory_factor_1	170	193	206	156	101	199	226	101	77	62	71	86	54	96	3.95718	3.68436	3.88282	3.44569	2.68855	4.15329	4.04488	1.93961	1.7305	1.25786
ENSMUSG00000028195	111.866	145.115	159.205	148.081	147.466	138.363	196.682	76.2422	54.0121	49.9006	78.3543	44.0618	87.5254	91.8768	0.94992	6.0154e-13	1.5007e-11	Cyr61	chr3	-	145646971	145649985	2028	protein_coding	cysteine_rich_protein_61	107	168	187	147	122	145	247	83	49	51	67	46	73	92	2.62457	3.37948	3.71414	3.42142	3.4221	3.18892	4.65834	1.6796	1.16041	1.0903
ENSMUSG00000030309	956.61	1000.26	933.092	1009.37	785.678	973.31	870.338	494.197	400.131	433.45	430.364	463.607	606.683	457.387	0.94906	1.9245e-37	1.9868e-35	Caprin2	chr6	-	148842492	148896237	3697	protein_coding	caprin_family_member_2	915	1158	1096	1002	650	1020	1093	538	363	443	368	484	506	458	12.3116	12.7781	11.9411	12.7931	10.0015	12.3054	11.3077	5.97214	4.71565	5.19517
ENSMUSG00000014599	285.415	259.134	243.489	197.441	189.771	232.831	279.496	112.067	92.5922	130.133	132.15	66.0927	115.102	148.8	0.9484	4.3174e-15	1.3139e-13	Csf1	chr3	-	107741048	107760469	4176	protein_coding	colony_stimulating_factor_1_(macrophage)	273	300	286	196	157	244	351	122	84	133	113	69	96	149	3.25195	2.93069	2.75861	2.2154	2.13865	2.60599	3.21476	1.19894	0.966058	1.38082
ENSMUSG00000047361	81.5471	101.062	109.826	83.6102	79.7766	60.1162	81.221	40.4176	39.6824	30.3317	47.9482	25.8624	32.3724	52.929	0.9462	1.092e-11	2.3755e-10	Gm973	chr1	+	59516264	59636417	3595	protein_coding	predicted_gene_973	78	117	129	83	66	63	102	44	36	31	41	27	27	53	1.07929	1.32769	1.44536	1.08977	1.04435	0.781601	1.08518	0.502286	0.480937	0.37386
ENSMUSG00000025350	93.0474	139.932	235.827	182.331	145.048	173.669	121.035	55.1149	46.2961	72.4047	95.8963	52.6826	93.5203	59.9197	0.9456	2.2543e-10	4.2164e-09	Rdh5	chr10	-	128913593	128922888	1329	protein_coding	retinol_dehydrogenase_5	89	162	277	181	120	182	152	60	42	74	82	55	78	60	3.33125	4.97278	8.39536	6.42851	5.13639	6.10787	4.37442	1.85278	1.51778	2.41408
ENSMUSG00000022500	104.548	97.6072	114.082	109.801	129.335	86.8345	98.7392	47.7662	33.0687	41.0946	33.9145	39.2725	89.9233	46.9371	0.94486	2.5014e-11	5.2401e-10	Litaf	chr16	-	10959275	11066157	2235	protein_coding	LPS-induced_TN_factor	100	113	134	109	107	91	124	52	30	42	29	41	75	47	2.22569	2.06258	2.41497	2.302	2.72338	1.81596	2.122	0.954823	0.644656	0.814737
ENSMUSG00000025492	405.645	412.887	355.869	335.448	407.344	349.246	344.791	180.042	88.1831	177.098	229.216	77.5871	197.831	129.826	0.94413	3.0893e-09	4.9466e-08	Ifitm3	chr7	-	141009586	141010770	678	protein_coding	interferon_induced_transmembrane_protein_3	388	478	418	333	337	366	433	196	80	181	196	81	165	130	28.4671	28.7612	24.8331	23.1831	28.2749	24.0766	24.4264	11.8638	5.66689	11.5743
ENSMUSG00000037820	253.005	194.351	238.381	219.603	223.616	200.387	191.904	120.334	93.6945	100.78	118.116	119.733	109.107	92.8755	0.94003	4.2868e-25	2.4877e-23	Tgm2	chr2	-	158116402	158146436	3596	protein_coding	transglutaminase_2_C_polypeptide	242	225	280	218	185	210	241	131	85	103	101	125	91	93	3.34763	2.55253	3.13634	2.8615	2.92653	2.60461	2.5633	1.49503	1.13523	1.24183
ENSMUSG00000057143	128.594	163.255	189.854	168.228	129.335	137.408	128.998	83.5909	74.9556	66.5341	79.5238	68.9663	79.1325	54.9264	0.93723	5.0889e-17	1.7874e-15	Trim12c	chr7	-	104338754	104353362	3740	protein_coding	tripartite_motif-containing_12C	123	189	223	167	107	144	162	91	68	68	68	72	66	55	1.63597	2.06157	2.40169	2.10766	1.62747	1.71725	1.65671	0.998543	0.873216	0.788285
ENSMUSG00000041974	236.278	299.732	268.179	262.919	267.131	304.398	264.366	112.067	136.684	144.809	155.539	136.017	140.28	137.815	0.93699	2.5967e-31	2.0915e-29	Spidr	chr16	-	15889227	16146851	3279	protein_coding	scaffolding_protein_involved_in_DNA_repair	226	347	315	261	221	319	332	122	124	148	133	142	117	138	3.42854	4.31715	3.86949	3.75713	3.834	4.33903	3.87257	1.52692	1.8162	1.95689
ENSMUSG00000039529	26.1369	34.5512	22.1354	12.0882	21.7572	20.993	24.6848	9.18581	9.9206	4.89221	8.18627	10.5365	3.59693	7.98929	0.93306	1.566e-07	1.9692e-06	Atp8b1	chr18	-	64528979	64661000	6440	protein_coding	ATPase_class_I_type_8B_member_1	25	40	26	12	18	22	31	10	9	5	7	11	3	8	0.193106	0.253386	0.162619	0.0879533	0.158997	0.152363	0.18411	0.0637252	0.0671183	0.0336612
ENSMUSG00000022893	860.427	988.165	1121.24	1072.83	1093.91	1114.54	1055.08	496.952	405.642	588.044	644.376	561.309	520.356	508.318	0.92685	1.4543e-33	1.3065e-31	Adamts1	chr16	-	85793827	85803113	4884	protein_coding	a_disintegrin-like_and_metallopeptidase_(reprolysin_type)_with_thrombospondin_type_1_motif_1	823	1144	1317	1065	905	1168	1325	541	368	601	551	586	434	509	8.38235	9.55563	10.8616	10.2927	10.5408	10.6662	10.3763	4.54589	3.61873	5.33512
ENSMUSG00000009376	192.368	230.629	304.787	248.816	200.65	233.785	186.33	89.1024	84.8762	112.521	129.811	106.323	129.49	130.825	0.92408	1.4461e-16	4.8425e-15	Met	chr6	+	17463800	17573980	6809	protein_coding	met_proto-oncogene	184	267	358	247	166	245	234	97	77	115	111	111	108	131	1.34424	1.59969	2.1178	1.71226	1.38684	1.60482	1.31442	0.584636	0.543115	0.732251
ENSMUSG00000033016	76.3197	76.0127	60.4466	53.3896	47.1407	65.8415	54.9436	27.5574	17.6366	27.3964	35.084	22.0309	28.7755	37.9491	0.92239	1.5978e-10	3.0281e-09	Nfatc1	chr18	-	80606205	80713071	4896	protein_coding	nuclear_factor_of_activated_T_cells_cytoplasmic_calcineurin_dependent_1	73	88	71	53	39	69	69	30	16	28	30	23	24	38	0.741691	0.733247	0.584119	0.510965	0.453132	0.628566	0.539026	0.251465	0.156951	0.247949
ENSMUSG00000091144	172.504	145.115	125.15	162.184	113.621	178.44	165.627	81.7537	76.0579	70.4479	63.1512	76.6292	63.5458	88.8808	0.9218	5.1675e-17	1.8116e-15	Phf11c	chr14	-	59380833	59395381	3459	protein_coding	PHD_finger_protein_11C	165	168	147	161	94	187	208	89	69	72	54	80	53	89	2.37288	1.98138	1.71179	2.19701	1.54589	2.41121	2.29993	1.05593	0.958039	0.902459
ENSMUSG00000079362	257.187	240.995	229.016	253.853	271.966	238.556	230.922	115.741	89.2854	165.357	145.014	91.9551	133.087	117.842	0.91924	1.1562e-19	4.78e-18	Gbp6	chr5	-	105215699	105293699	4314	protein_coding	guanylate_binding_protein_6	246	279	269	252	225	250	290	126	81	169	124	96	111	118	2.83659	2.63835	2.51164	2.75726	2.96691	2.58466	2.57111	1.19864	0.901757	1.69845
ENSMUSG00000037095	15.6821	12.0929	26.3922	5.03676	7.25241	15.2676	14.3331	2.75574	4.40915	2.93533	2.33893	2.8736	1.19898	1.99732	0.91781	3.2795e-07	3.9057e-06	Lrg1	chr17	-	56119680	56121946	1351	protein_coding	leucine-rich_alpha-2-glycoprotein_1	15	14	31	5	6	16	18	3	4	3	2	3	1	2	0.552303	0.422748	0.924253	0.174691	0.252637	0.528212	0.509588	0.0911303	0.142197	0.0962746
ENSMUSG00000048612	571.875	534.68	462.289	457.337	414.596	462.799	543.862	275.574	227.071	237.762	318.095	191.573	232.602	266.643	0.91772	1.1916e-24	6.727e-23	Myof	chr19	-	37899036	38043577	7094	protein_coding	myoferlin	547	619	543	454	343	485	683	300	206	243	272	200	194	267	3.83564	3.55966	3.08314	3.0208	2.75045	3.04926	3.68241	1.73551	1.39463	1.48512
ENSMUSG00000030208	71.0924	67.3749	128.556	72.5293	66.4805	62.9789	105.109	17.453	34.1709	48.9221	30.4061	19.1573	31.1734	53.9277	0.9168	2.6596e-08	3.7338e-07	Emp1	chr6	+	135362931	135383173	2832	protein_coding	epithelial_membrane_protein_1	68	78	151	72	55	66	132	19	31	50	26	20	26	54	1.19442	1.1236	2.14767	1.20004	1.10477	1.03943	1.78272	0.275332	0.525718	0.76546
ENSMUSG00000052336	269.733	280.729	248.597	265.941	275.592	246.19	209.423	144.217	124.559	131.111	146.183	112.07	112.704	140.811	0.91638	8.9826e-27	5.7483e-25	Cx3cr1	chr9	-	119901616	120068283	3729	protein_coding	chemokine_(C-X3-C_motif)_receptor_1	258	325	292	264	228	258	263	157	113	134	125	117	94	141	3.44167	3.55549	3.1541	3.34171	3.47811	3.08582	2.69752	1.72784	1.45536	1.55797
ENSMUSG00000039116	176.685	186.577	152.394	141.029	129.335	156.493	169.608	46.8476	60.6259	82.1892	81.8627	83.3343	97.1172	91.8768	0.91566	7.9047e-15	2.3483e-13	Gpr126	chr10	-	14402585	14545036	6505	protein_coding	G_protein-coupled_receptor_126	169	216	179	140	107	164	213	51	55	84	70	87	81	92	1.29235	1.35461	1.10838	1.01587	0.935703	1.12445	1.25237	0.321751	0.406069	0.559858
ENSMUSG00000089984	226.868	168.437	207.732	188.375	118.456	234.739	192.701	110.23	89.2854	86.1029	92.3879	94.8287	89.9233	94.8728	0.91507	4.3133e-16	1.3968e-14	Fbxo24	chr5	-	137612503	137629002	2306	protein_coding	F-box_protein_24	217	195	244	187	98	246	242	120	81	88	79	99	75	95	4.68104	3.44972	4.26202	3.82771	2.41751	4.75794	4.01382	2.1356	1.68698	1.65451
ENSMUSG00000001123	113.957	141.66	142.177	119.875	165.597	112.599	115.461	69.8122	48.5007	66.5341	86.5406	54.5983	73.1376	38.9478	0.90983	6.1558e-13	1.5317e-11	Lgals9	chr11	-	78962974	78984946	1586	protein_coding	lectin_galactose_binding_soluble_9	109	164	167	119	137	118	145	76	44	68	74	57	61	39	3.41873	4.21842	4.24129	3.54161	4.91381	3.31835	3.49677	1.96656	1.3324	1.85888
ENSMUSG00000090197	5.22738	6.91024	16.1759	12.0882	4.83494	20.993	7.96284	0	0	0	1.16947	1.91573	2.39796	0	0.90953	7.5233e-08	9.907e-07	Dnaja1-ps	chr5	-	21951858	21952499	642	pseudogene	DnaJ_(Hsp40)_homolog_subfamily_A_member_1_pseudogene	5	8	19	12	4	22	10	0	0	0	1	2	2	0	0.387415	0.508351	1.19207	0.882273	0.354427	1.52838	0.595754	0	0	0
ENSMUSG00000036362	52.2738	52.6906	53.6357	41.3014	65.2717	52.4824	56.5362	20.2088	28.6595	14.6766	25.7283	22.9888	19.1836	36.9505	0.90859	7.7708e-10	1.3686e-08	P2ry13	chr3	-	59207896	59210882	2524	protein_coding	purinergic_receptor_P2Y_G-protein_coupled_13	50	61	63	41	54	55	71	22	26	15	22	24	16	37	0.985422	0.985937	1.00539	0.766745	1.21704	0.971889	1.0759	0.357709	0.49473	0.25766
ENSMUSG00000046402	481.964	435.345	561.898	440.213	540.305	474.25	422.03	237.912	195.105	277.878	302.892	216.478	258.979	231.689	0.90693	4.5795e-26	2.862e-24	Rbp1	chr9	+	98422961	98446575	2652	protein_coding	retinol_binding_protein_1_cellular	461	504	660	437	447	497	530	259	177	284	259	226	216	232	8.64707	7.75293	10.0243	7.77794	9.58816	8.35846	7.64371	4.00796	3.20541	4.64291
ENSMUSG00000030905	1896.49	1705.1	2335.28	2243.37	2218.03	2107.88	1573.46	890.105	776.011	1200.55	1030.3	1089.09	1017.93	1093.53	0.9062	1.4194e-19	5.829e-18	Crym	chr7	-	120186380	120202111	2681	protein_coding	crystallin_mu	1814	1974	2743	2227	1835	2209	1976	969	704	1227	881	1137	849	1095	33.6575	30.0372	41.211	39.2085	38.935	36.7487	28.1898	14.8328	12.6113	19.8424
ENSMUSG00000044583	24.0459	30.2323	16.1759	26.1911	27.8009	16.2218	18.3145	7.34865	5.51144	8.80598	11.6947	6.70506	10.7908	5.99197	0.9061	2.8806e-07	3.4594e-06	Tlr7	chrX	-	167304929	167330558	3897	protein_coding	toll-like_receptor_7	23	35	19	26	23	17	23	8	5	9	10	7	9	6	0.293589	0.366392	0.196385	0.31492	0.335737	0.194564	0.225735	0.0842474	0.0616203	0.100129
ENSMUSG00000021624	48.0919	31.0961	32.3517	18.1323	22.966	26.7183	39.0179	15.6159	7.71602	7.82754	17.542	4.78933	14.3877	11.9839	0.90529	2.7161e-07	3.285e-06	Cd180	chr13	+	102693558	102739629	2650	protein_coding	CD180_antigen	46	36	38	18	19	28	49	17	7	8	15	5	12	12	0.863483	0.554199	0.577593	0.320615	0.407858	0.471254	0.707216	0.263269	0.126863	0.130885
ENSMUSG00000036908	134.866	105.381	105.569	127.934	95.4901	124.049	86.7949	45.0105	45.1938	56.7497	50.2871	42.1461	61.1479	75.8982	0.9043	6.2238e-13	1.5465e-11	Unc93b1	chr19	+	3935186	3949340	2266	protein_coding	unc-93_homolog_B1_(C._elegans)	129	122	124	127	79	130	109	49	41	58	43	44	51	76	2.83186	2.19639	2.20418	2.64546	1.98321	2.55874	1.83979	0.887428	0.868977	1.10972
ENSMUSG00000034457	9.40928	17.2756	11.0677	10.0735	13.2961	11.4507	22.296	5.51149	0	2.93533	0	0	5.99489	0	0.90394	2.9744e-07	3.5605e-06	Eda2r	chrX	-	97333840	97377216	4752	protein_coding	ectodysplasin_A2_receptor	9	20	13	10	11	12	28	6	0	3	0	0	5	0	0.0942124	0.171697	0.110192	0.0993299	0.131679	0.112628	0.225364	0.0518169	0	0.027371
ENSMUSG00000061718	398.326	339.466	396.734	298.176	337.237	440.852	306.569	197.495	117.945	205.473	219.86	139.848	176.25	198.734	0.90327	1.1148e-16	3.7805e-15	Ppp1r1b	chr11	+	98348404	98357796	2001	protein_coding	protein_phosphatase_1_regulatory_(inhibitor)_subunit_1B	381	393	466	296	279	462	385	215	107	210	188	146	147	199	9.47152	8.01225	9.38044	6.98234	7.93156	10.2977	7.35895	4.40949	2.56815	4.55007
ENSMUSG00000022508	1127.02	992.484	1006.31	1101.03	882.377	1025.79	922.893	497.871	572.088	463.782	569.531	508.627	592.295	505.322	0.9016	4.8159e-46	6.8695e-44	Bcl6	chr16	-	23965052	23988852	3933	protein_coding	B_cell_leukemia/lymphoma_6	1078	1149	1182	1093	730	1075	1159	542	519	474	487	531	494	506	13.6344	11.918	12.1054	13.1176	10.5585	12.1907	11.271	5.65552	6.33764	5.22517
ENSMUSG00000001166	48.0919	54.4182	32.3517	37.272	55.6018	35.3063	34.2402	22.9645	22.0458	19.5689	16.3725	21.073	10.7908	11.9839	0.90124	1.9808e-08	2.8168e-07	Oas1c	chr5	-	120800194	120812514	2291	protein_coding	2'-5'_oligoadenylate_synthetase_1C	46	63	38	37	46	37	43	25	20	20	14	22	9	12	0.998791	1.12182	0.668102	0.762313	1.14218	0.720311	0.717869	0.447829	0.419266	0.378487
ENSMUSG00000086964	37.6371	31.9599	46.8249	50.3676	37.4708	45.8028	41.4068	16.5345	23.1481	8.80598	19.8809	27.7781	11.9898	15.9786	0.90116	1.8821e-08	2.6867e-07	Gm15948	chr5	-	66988816	66991207	403	antisense	predicted_gene_15948	36	37	55	50	31	48	52	18	21	9	17	29	10	16	4.44364	3.74546	5.49721	5.85628	4.37581	5.31226	4.93515	1.83301	2.50264	0.96824
ENSMUSG00000010122	33.4552	27.641	47.6762	35.2573	35.0533	41.9859	42.203	9.18581	13.2275	27.3964	4.67787	20.1152	13.1888	14.9799	0.90114	1.2368e-07	1.5787e-06	Slc47a1	chr11	-	61343401	61378345	2987	protein_coding	solute_carrier_family_47_member_1	32	32	56	35	29	44	53	10	12	28	4	21	11	15	0.532913	0.437042	0.755157	0.553082	0.552286	0.656993	0.678645	0.137392	0.192944	0.406414
ENSMUSG00000020399	46.0009	25.0496	26.3922	22.1617	18.131	20.0387	21.4997	7.34865	12.1252	7.82754	10.5252	9.57865	9.59182	8.98795	0.90035	2.9083e-07	3.4903e-06	Havcr2	chr11	+	46454935	46481255	2721	protein_coding	hepatitis_A_virus_cellular_receptor_2	44	29	31	22	15	21	27	8	11	8	9	10	8	9	0.804389	0.434789	0.4589	0.381637	0.313591	0.344218	0.379522	0.120659	0.194155	0.12747
ENSMUSG00000024397	31.3643	22.4583	27.2436	17.125	25.3834	47.7113	15.9257	5.51149	8.81831	12.7198	5.84734	6.70506	11.9898	11.9839	0.89989	4.9841e-07	5.7383e-06	Aif1	chr17	-	35170991	35176068	875	protein_coding	allograft_inflammatory_factor_1	30	26	32	17	21	50	20	6	8	13	5	7	10	12	1.70551	1.2122	1.47308	0.917059	1.36525	2.54862	0.874227	0.28141	0.439103	0.644141
ENSMUSG00000045246	1417.67	1234.34	1418.37	1224.94	1309.06	1327.33	1067.82	685.261	712.078	636.966	751.967	689.663	591.096	664.11	0.89835	2.1642e-46	3.1842e-44	Kcng4	chr8	-	119623854	119635680	3806	protein_coding	potassium_voltage-gated_channel_subfamily_G_member_4	1356	1429	1666	1216	1083	1391	1341	746	646	651	643	720	493	665	17.7228	15.317	17.6316	15.0807	16.1868	16.3005	13.476	8.04391	8.1517	7.4158
ENSMUSG00000028003	86.7745	176.211	231.57	192.404	151.092	147.905	104.313	14.6973	23.1481	18.5904	68.9986	13.4101	79.1325	26.9638	0.89651	6.5671e-07	7.3967e-06	Lrat	chr3	-	82892579	82903973	5351	protein_coding	lecithin-retinol_acyltransferase_(phosphatidylcholine-retinol-O-acyltransferase)	83	204	272	191	125	155	131	16	21	19	59	14	66	27	0.771587	1.55526	2.04747	1.68483	1.32885	1.29193	0.93635	0.122711	0.188482	0.153945
ENSMUSG00000019256	3359.11	3317.78	2971.25	3186.25	2974.7	3186.16	3130.19	1720.5	1717.37	1633.02	1684.03	1715.54	1695.35	1682.74	0.89288	5.0078e-146	4.456e-143	Ahr	chr12	-	35497974	35535038	5548	protein_coding	aryl-hydrocarbon_receptor	3213	3841	3490	3163	2461	3339	3931	1873	1558	1669	1440	1791	1414	1685	28.8082	28.2434	25.3381	26.9104	25.2334	26.8425	27.1	13.8547	13.487	13.0426
ENSMUSG00000025888	16.7276	19.867	7.66225	18.1323	10.8786	12.4049	11.148	1.83716	7.71602	1.95689	4.67787	0.957865	0	3.99464	0.89055	8.0226e-07	8.9021e-06	Casp1	chr9	+	5298517	5307265	1497	protein_coding	caspase_1	16	23	9	18	9	13	14	2	7	2	4	1	0	4	0.531667	0.62678	0.242162	0.567554	0.341997	0.387316	0.357691	0.0548284	0.224575	0.0579234
ENSMUSG00000026365	423.418	615.875	612.98	480.507	534.261	521.961	485.733	264.551	249.117	238.74	341.484	238.508	281.76	297.601	0.88762	4.2727e-24	2.3075e-22	Cfh	chr1	-	140085855	140183411	4365	protein_coding	complement_component_factor_h	405	713	720	477	442	547	610	288	226	244	292	249	235	298	4.61543	6.66368	6.64405	5.15811	5.76022	5.58916	5.345	2.70773	2.48662	2.42355
ENSMUSG00000040747	42.8645	63.9198	40.8653	47.3455	51.9756	39.1232	43.7956	30.3132	18.7389	18.5904	25.7283	14.368	15.5867	23.9679	0.88604	7.7027e-09	1.1607e-07	Cd53	chr3	-	106758861	106790149	2802	protein_coding	CD53_antigen	41	74	48	47	43	41	55	33	17	19	22	15	13	24	0.727876	1.07739	0.690014	0.791747	0.872975	0.652618	0.750752	0.483329	0.291384	0.293989
ENSMUSG00000030495	13.5912	19.0032	17.8786	23.1691	15.7136	26.7183	11.9443	3.67432	3.30687	5.87066	5.84734	7.66292	9.59182	5.99197	0.88401	9.7556e-07	1.0629e-05	Slc7a10	chr7	+	35186385	35204898	1949	protein_coding	solute_carrier_family_7_(cationic_amino_acid_transporter_y+_system)_member_10	13	22	21	23	13	28	15	4	3	6	5	8	8	6	0.331798	0.460489	0.434002	0.557022	0.379431	0.640751	0.294362	0.0842258	0.0739254	0.13347
ENSMUSG00000037868	9.40928	20.7307	8.51361	15.1103	16.9223	20.0387	12.7405	5.51149	6.61373	4.89221	4.67787	1.91573	1.19898	0	0.8814	1.162e-06	1.2503e-05	Egr2	chr10	+	67535475	67542188	2965	protein_coding	early_growth_response_2	9	24	10	15	14	21	16	6	6	5	4	2	1	0	0.150994	0.330214	0.13585	0.238794	0.268599	0.315891	0.206394	0.0830469	0.0971876	0.0731124
ENSMUSG00000023191	998.429	763.582	958.633	954.969	829.193	876.933	999.336	490.522	519.178	467.696	418.669	522.995	533.545	434.418	0.88075	6.5774e-38	6.8662e-36	Leprel2	chr6	-	124841089	124857752	2901	protein_coding	leprecan-like_2	955	884	1126	948	686	919	1255	534	471	478	358	546	445	435	16.3756	12.4312	15.6342	15.4247	13.4517	14.129	16.5462	7.55424	7.79754	7.14374
ENSMUSG00000043549	16.7276	28.5048	18.7299	14.1029	12.0874	22.9014	25.4811	6.43007	6.61373	8.80598	2.33893	6.70506	5.99489	9.98661	0.87944	1.0108e-06	1.0988e-05	4932442L08Rik	chrX	-	94355053	94366777	2939	protein_coding	RIKEN_cDNA_4932442L08_gene	16	33	22	14	10	24	32	7	6	9	2	7	5	10	0.270808	0.458061	0.301514	0.224846	0.193554	0.364213	0.41644	0.0977452	0.0980474	0.132767
ENSMUSG00000002325	770.516	766.173	761.968	737.381	742.164	730.936	711.082	416.117	416.665	403.118	399.958	387.935	406.453	379.491	0.87885	2.057e-79	6.6269e-77	Irf9	chr14	+	55603571	55610030	3869	protein_coding	interferon_regulatory_factor_9	737	887	895	732	614	766	893	453	378	412	342	405	339	380	9.47568	9.35263	9.3177	8.93036	9.02757	8.83026	8.82785	4.80503	4.69221	4.61683
ENSMUSG00000022002	18.8186	12.0929	12.7704	11.0809	9.66988	16.2218	12.7405	2.75574	9.9206	2.93533	0	2.8736	2.39796	0.998661	0.87099	1.4678e-06	1.5478e-05	4930564B18Rik	chr14	+	75642259	75667137	869	protein_coding	RIKEN_cDNA_4930564B18_gene	18	14	15	11	8	17	16	3	9	3	0	3	2	1	1.03037	0.65723	0.695274	0.597488	0.523687	0.872514	0.70421	0.141677	0.497402	0.149674
ENSMUSG00000027995	27.1824	22.4583	38.3112	39.2867	26.5922	35.3063	21.4997	8.26723	2.20458	10.7629	5.84734	2.8736	27.5765	6.99063	0.87052	1.6903e-06	1.7606e-05	Tlr2	chr3	-	83836273	83841767	3013	protein_coding	toll-like_receptor_2	26	26	45	39	22	37	27	9	2	11	5	3	23	7	0.429256	0.352033	0.601586	0.610973	0.41536	0.547704	0.342741	0.122586	0.0318798	0.158285
ENSMUSG00000036880	503.919	500.129	521.033	519.793	568.106	527.687	454.678	271.9	292.106	262.223	319.265	225.098	294.949	261.649	0.86874	4.139e-37	4.1806e-35	Acaa2	chr18	+	74779197	74806207	1515	protein_coding	acetyl-Coenzyme_A_acyltransferase_2_(mitochondrial_3-oxoacyl-Coenzyme_A_thiolase)	482	579	612	516	470	553	571	296	265	268	273	235	246	262	15.8262	15.591	16.2713	16.0766	17.6476	16.2801	14.4154	8.01819	8.40074	7.66951
ENSMUSG00000026548	20.9095	15.548	11.9191	15.1103	18.131	18.1303	20.7034	4.5929	3.30687	3.91377	10.5252	6.70506	4.79591	6.99063	0.866	1.5507e-06	1.6283e-05	Slamf9	chr1	+	172475358	172478575	1313	protein_coding	SLAM_family_member_9	20	18	14	15	15	19	26	5	3	4	9	7	4	7	0.757717	0.559264	0.429485	0.539241	0.649872	0.645405	0.757374	0.15628	0.109734	0.132081
ENSMUSG00000000290	51.2283	38.8701	49.3789	37.272	31.4271	44.8486	43.7956	18.3716	19.8412	23.4826	29.2367	14.368	19.1836	11.9839	0.86173	2.8082e-08	3.9306e-07	Itgb2	chr10	+	77530252	77565708	2970	protein_coding	integrin_beta_2	49	45	58	37	26	47	55	20	18	24	25	15	16	12	0.820694	0.618109	0.786604	0.588033	0.497987	0.705805	0.708285	0.276357	0.291072	0.350349
ENSMUSG00000018927	15.6821	10.3654	17.8786	20.147	16.9223	12.4049	13.5368	9.18581	1.10229	2.93533	2.33893	2.8736	7.19387	4.99331	0.86026	2.2702e-06	2.3155e-05	Ccl6	chr11	-	83587882	83593087	1440	protein_coding	chemokine_(C-C_motif)_ligand_6	15	12	21	20	14	13	17	10	1	3	2	3	6	5	0.518168	0.33996	0.58741	0.655578	0.553053	0.402647	0.451532	0.284993	0.033352	0.0903243
ENSMUSG00000085204	41.819	46.6441	23.8381	44.3235	30.2184	44.8486	47.777	15.6159	20.9435	17.612	16.3725	18.1994	14.3877	21.9705	0.85956	6.2433e-08	8.2856e-07	Gm15327	chr13	+	111809141	111811039	467	processed_transcript	predicted_gene_15327	40	54	28	44	25	47	60	17	19	18	14	19	12	22	4.26074	4.71722	2.41505	4.44726	3.04526	4.48874	4.91401	1.49393	1.95398	1.6711
ENSMUSG00000070498	1280.71	1091.82	783.252	827.035	948.857	878.841	1024.02	597.996	383.596	448.127	512.227	317.053	454.413	639.143	0.85897	1.7638e-10	3.3259e-09	Tmem132b	chr5	+	125531774	125792583	7995	protein_coding	transmembrane_protein_132B	1225	1264	920	821	785	921	1286	651	348	458	438	331	379	640	7.62183	6.44967	4.63504	4.84709	5.58538	5.13789	6.15212	3.34164	2.09048	2.48366
ENSMUSG00000024164	149.503	181.394	180.489	169.235	157.136	179.394	141.739	122.171	33.0687	93.9305	73.6764	34.4832	50.3571	65.9116	0.85823	5.4107e-07	6.1762e-06	C3	chr17	-	57203970	57228136	5136	protein_coding	complement_component_3	143	210	212	168	130	188	178	133	30	96	63	36	42	66	1.38501	1.66803	1.66263	1.54398	1.43986	1.63259	1.32555	1.06273	0.280531	0.810386
ENSMUSG00000000392	23.0005	22.4583	64.7034	39.2867	22.966	32.4437	17.5182	3.67432	5.51144	4.89221	21.0504	11.4944	14.3877	3.99464	0.85687	2.4808e-06	2.5152e-05	Fap	chr2	-	62500943	62574075	2867	protein_coding	fibroblast_activation_protein	22	26	76	39	19	34	22	4	5	5	18	12	12	4	0.381713	0.36996	1.06775	0.642087	0.376988	0.528926	0.293493	0.0572571	0.0837581	0.0756115
ENSMUSG00000018654	33.4552	19.0032	31.5004	26.1911	25.3834	43.8944	34.2402	17.453	9.9206	3.91377	10.5252	16.2837	16.7857	8.98795	0.85685	9.0605e-07	9.9357e-06	Ikzf1	chr11	+	11685003	11772926	5163	protein_coding	IKAROS_family_zinc_finger_1	32	22	37	26	21	46	43	19	9	4	9	17	14	9	0.308311	0.173832	0.288658	0.237699	0.231376	0.397374	0.318543	0.151025	0.0837192	0.0335895
ENSMUSG00000027962	538.42	616.739	544.871	550.014	557.227	505.739	558.991	254.447	285.493	324.843	321.603	298.854	328.52	291.609	0.856	9.0193e-43	1.1623e-40	Vcam1	chr3	-	116110020	116129688	3398	protein_coding	vascular_cell_adhesion_molecule_1	515	714	640	546	461	530	702	277	259	332	275	312	274	292	7.53921	8.57203	7.58649	7.58448	7.71754	6.95658	7.90161	3.34544	3.66067	4.23604
ENSMUSG00000020388	307.37	247.041	274.138	283.066	274.383	301.535	275.514	161.67	83.7739	159.486	159.048	125.48	182.245	152.795	0.85568	9.5361e-17	3.2457e-15	Pdlim4	chr11	-	54054928	54069014	1370	protein_coding	PDZ_and_LIM_domain_4	294	286	322	281	227	316	346	176	76	163	136	131	152	153	10.675	8.51637	9.46716	9.68149	9.42555	10.2875	9.65957	5.27217	2.66427	5.15837
ENSMUSG00000096727	58.5466	62.1922	17.8786	40.2941	39.8883	34.3521	42.203	22.9645	19.8412	18.5904	16.3725	11.4944	9.59182	19.9732	0.85544	6.8015e-07	7.6332e-06	Psmb9	chr17	-	34181988	34187764	2884	protein_coding	proteasome_(prosome_macropain)_subunit_beta_type_9_(large_multifunctional_peptidase_2)	56	72	21	40	33	36	53	25	18	19	14	12	8	20	0.965905	1.01846	0.293298	0.654668	0.650909	0.556738	0.702882	0.355747	0.299752	0.28563
ENSMUSG00000067212	277.051	247.041	221.354	216.581	246.582	222.334	190.312	119.416	113.536	136.982	137.997	104.407	125.893	120.838	0.85464	2.1685e-21	9.9314e-20	H2-T23	chr17	-	36029773	36032855	2642	protein_coding	histocompatibility_2_T_region_locus_23	265	286	260	215	204	233	239	130	103	140	118	109	105	121	4.98947	4.41613	3.96392	3.84116	4.39237	3.93338	3.45993	2.01933	1.87236	2.29742
ENSMUSG00000046879	201.777	224.583	182.191	177.294	207.903	228.06	179.96	95.5324	82.6716	113.499	127.472	69.9242	137.882	101.863	0.85207	1.0969e-14	3.2027e-13	Irgm1	chr11	-	48861968	48871683	3832	protein_coding	immunity-related_GTPase_family_M_member_1	193	260	214	176	172	239	226	104	75	116	109	73	115	102	2.50538	2.76794	2.24943	2.16792	2.55331	2.78173	2.25572	1.11379	0.939983	1.31244
ENSMUSG00000043850	324.098	310.961	338.842	254.86	252.626	309.169	309.754	153.403	177.468	144.809	163.725	169.542	133.087	184.752	0.84889	1.0405e-23	5.4617e-22	Clrn1	chr3	-	58844028	58885340	3083	protein_coding	clarin_1	310	360	398	253	209	324	389	167	161	148	140	177	111	185	5.00184	4.76363	5.19989	3.8735	3.85633	4.68721	4.8259	2.223	2.50805	2.0813
ENSMUSG00000032988	115.002	125.248	244.341	158.154	149.883	158.401	99.5355	50.522	55.1144	72.4047	90.049	59.3877	89.9233	87.8822	0.84636	6.5593e-09	9.9648e-08	Slc16a8	chr15	-	79251014	79254761	1806	protein_coding	solute_carrier_family_16_(monocarboxylic_acid_transporters)_member_8	110	145	287	157	124	166	125	55	50	74	77	62	75	88	3.02982	3.27536	6.40101	4.10335	3.90576	4.09953	2.64725	1.2498	1.32965	1.77648
ENSMUSG00000037321	106.639	101.926	103.015	89.6543	93.0726	91.6056	121.035	53.2777	47.3984	67.5125	56.1344	47.8933	38.3673	53.9277	0.84548	2.5438e-13	6.6296e-12	Tap1	chr17	+	34187553	34197225	3911	protein_coding	transporter_1_ATP-binding_cassette_sub-family_B_(MDR/TAP)	102	118	121	89	77	96	152	58	43	69	48	50	32	54	1.29734	1.23084	1.24618	1.07413	1.11996	1.09478	1.48648	0.608607	0.528038	0.764904
ENSMUSG00000030342	1340.3	1414.01	1391.98	1256.17	1266.75	1343.55	1028.8	596.159	656.964	768.077	763.662	689.663	708.596	743.004	0.84527	5.3103e-36	5.1414e-34	Cd9	chr6	-	125460266	125494791	1228	protein_coding	CD9_antigen	1282	1637	1635	1247	1048	1408	1292	649	596	785	653	720	591	744	51.9316	54.3825	53.6295	47.9319	48.5472	51.1385	40.2408	21.6892	23.3095	27.7151
ENSMUSG00000022148	14.6367	22.4583	27.2436	42.3088	16.9223	22.9014	23.0922	7.34865	4.40915	16.6335	1.16947	7.66292	7.19387	10.9853	0.84432	3.2251e-06	3.1998e-05	Fyb	chr15	+	6579871	6663313	2669	protein_coding	FYN_binding_protein	14	26	32	42	14	24	29	8	4	17	1	8	6	11	0.260928	0.397405	0.482932	0.742775	0.298388	0.401057	0.415577	0.123009	0.0719774	0.276151
ENSMUSG00000005470	119.184	103.654	107.271	132.97	111.204	132.637	91.5727	36.7432	54.0121	60.6634	74.8459	52.6826	56.352	72.9023	0.84251	7.1131e-12	1.573e-10	Asf1b	chr8	+	83955507	83970197	1788	protein_coding	anti-silencing_function_1B_histone_chaperone	114	120	126	132	92	139	115	40	49	62	64	55	47	73	3.17161	2.73793	2.83849	3.48468	2.92699	3.46729	2.45998	0.918099	1.31617	1.50338
ENSMUSG00000037280	9.40928	8.6378	17.8786	16.1176	3.62621	13.3592	17.5182	0	1.10229	2.93533	4.67787	0	1.19898	4.99331	0.83872	1.7377e-06	1.806e-05	Galnt6	chr15	-	100691813	100729376	3798	protein_coding	UDP-N-acetyl-alpha-D-galactosamine:polypeptide_N-acetylgalactosaminyltransferase_6	9	10	21	16	3	14	22	0	1	3	4	0	1	5	0.117877	0.107412	0.222715	0.198848	0.0449332	0.164406	0.221549	0	0.0126453	0.0342462
ENSMUSG00000068009	57.5012	52.6906	44.2708	24.1764	32.6359	34.3521	39.8142	19.2902	30.8641	18.5904	16.3725	8.62079	11.9898	15.9786	0.83493	8.6126e-07	9.4779e-06	Bpifb6	chr2	+	153900388	153912795	1669	protein_coding	BPI_fold_containing_family_B_member_6	55	61	52	24	27	36	50	21	28	19	14	9	10	16	1.63926	1.49102	1.25496	0.678753	0.920256	0.962032	1.14582	0.516369	0.805724	0.493563
ENSMUSG00000022372	20.9095	18.1394	14.4731	16.1176	16.9223	20.0387	21.4997	7.34865	4.40915	4.89221	10.5252	11.4944	2.39796	4.99331	0.8343	3.3445e-06	3.3024e-05	Sla	chr15	-	66780819	66831829	6572	protein_coding	src-like_adaptor	20	21	17	16	14	21	27	8	4	5	9	12	2	5	0.151382	0.130356	0.104192	0.114916	0.12118	0.142516	0.157133	0.0499562	0.0292312	0.0329851
ENSMUSG00000004730	47.0464	47.5079	44.2708	41.3014	41.097	39.1232	40.6105	14.6973	12.1252	41.0946	21.0504	8.62079	13.1888	17.9759	0.83225	8.3084e-07	9.1919e-06	Emr1	chr17	+	57358686	57483529	3245	protein_coding	EGF-like_module_containing_mucin-like_hormone_receptor-like_sequence_1	45	55	52	41	34	41	51	16	11	42	18	9	11	18	0.689826	0.691444	0.645466	0.596384	0.596027	0.563524	0.601115	0.20235	0.162803	0.561152
ENSMUSG00000033777	25.0914	17.2756	25.5408	26.1911	24.1747	28.6268	18.3145	10.1044	5.51144	12.7198	7.0168	7.66292	14.3877	9.98661	0.82858	1.7494e-06	1.817e-05	Tlr13	chrX	+	106143204	106160493	4060	protein_coding	toll-like_receptor_13	24	20	30	26	20	30	23	11	5	13	6	8	12	10	0.294054	0.200961	0.297632	0.302276	0.280224	0.329563	0.216673	0.111189	0.0591464	0.138824
ENSMUSG00000025491	37.6371	41.4615	40.014	40.2941	41.097	48.6655	39.8142	27.5574	24.2503	18.5904	25.7283	4.78933	14.3877	13.9813	0.82774	4.7268e-07	5.4707e-06	Ifitm1	chr7	+	140967221	140969825	882	protein_coding	interferon_induced_transmembrane_protein_1	36	48	47	40	34	51	50	30	22	19	22	5	12	14	2.03037	2.22015	2.14642	2.14066	2.19286	2.57896	2.16822	1.39589	1.19795	0.933965
ENSMUSG00000098112	32.4098	36.2788	39.1626	31.2279	20.5485	37.2148	28.6662	11.9416	7.71602	21.5257	5.84734	12.4523	16.7857	19.9732	0.82616	1.1528e-06	1.2416e-05	Bin2	chr15	-	100641077	100669553	2036	protein_coding	bridging_integrator_2	31	42	46	31	17	39	36	13	7	22	5	13	14	20	0.757401	0.841551	0.910049	0.718688	0.474977	0.854339	0.67628	0.262037	0.165122	0.46848
ENSMUSG00000022574	96.1838	70.83	107.271	98.7204	113.621	71.5669	103.517	47.7662	52.9098	34.2455	49.1176	28.736	69.5407	49.9331	0.82365	2.9102e-09	4.6638e-08	Naprt1	chr15	-	75890964	75894481	1890	protein_coding	nicotinate_phosphoribosyltransferase	92	82	126	98	94	75	130	52	48	35	42	30	58	50	2.42141	1.76995	2.6853	2.44749	2.82922	1.76988	2.63077	1.12912	1.21973	0.802882
ENSMUSG00000040084	1019.34	1179.06	949.268	1134.28	1101.16	930.37	953.948	682.506	513.666	418.773	488.837	516.289	675.025	655.122	0.82244	3.3925e-20	1.4539e-18	Bub1b	chr2	+	118598211	118641591	3668	protein_coding	budding_uninhibited_by_benzimidazoles_1_homolog_beta_(S._cerevisiae)	975	1365	1115	1126	911	975	1198	743	466	428	418	539	563	656	13.2226	15.1814	12.2442	14.4899	14.1283	11.8555	12.4919	8.31298	6.10156	5.05895
ENSMUSG00000027514	13.5912	15.548	10.2163	28.2058	24.1747	17.1761	11.9443	6.43007	5.51144	2.93533	5.84734	4.78933	8.39284	5.99197	0.8224	5.9131e-06	5.5805e-05	Zbp1	chr2	-	173206612	173218923	3325	protein_coding	Z-DNA_binding_protein_1	13	18	12	28	20	18	15	7	5	3	5	5	7	6	0.194488	0.220846	0.14537	0.397487	0.342168	0.241448	0.172545	0.0863979	0.0722209	0.0391179
ENSMUSG00000059631	24.0459	23.3221	8.51361	8.05881	10.8786	10.4965	16.722	2.75574	6.61373	0.978443	7.0168	0.957865	0	3.99464	0.82118	4.1599e-06	4.0422e-05	1500035N22Rik	chr5	+	24985842	24998168	865	protein_coding	RIKEN_cDNA_1500035N22_gene	23	27	10	8	9	11	21	3	6	1	6	1	0	4	1.32268	1.27338	0.465659	0.436546	0.591872	0.567179	0.92855	0.142332	0.333134	0.0501221
ENSMUSG00000035208	17.7731	47.5079	21.284	18.1323	27.8009	25.7641	23.8885	12.8601	7.71602	10.7629	14.0336	5.74719	5.99489	12.9826	0.81918	4.2062e-06	4.0851e-05	Slfn8	chr11	-	83002158	83020810	4011	protein_coding	schlafen_8	17	55	25	18	23	27	30	14	7	11	12	6	5	13	0.210833	0.559395	0.251057	0.211825	0.326194	0.30023	0.286069	0.143243	0.0838166	0.118901
ENSMUSG00000040296	247.778	266.044	252.854	197.441	278.009	242.373	233.311	112.067	113.536	157.529	142.675	136.017	134.286	141.81	0.81741	1.9892e-20	8.7048e-19	Ddx58	chr4	-	40203773	40239828	3874	protein_coding	DEAD_(Asp-Glu-Ala-Asp)_box_polypeptide_58	237	308	297	196	230	254	293	122	103	161	122	142	112	142	3.0432	3.2434	3.08803	2.3881	3.3773	2.92427	2.89274	1.2924	1.27692	1.80182
ENSMUSG00000089789	35.5462	42.3252	34.0544	32.2352	25.3834	28.6268	42.9993	22.9645	14.3297	17.612	15.2031	15.3258	15.5867	9.98661	0.81735	4.024e-07	4.7172e-06	Rdh1	chr10	+	127759721	127768297	3930	protein_coding	retinol_dehydrogenase_1_(all_trans)	34	49	40	32	21	30	54	25	13	18	13	16	13	10	0.430356	0.508642	0.40997	0.384339	0.303968	0.340465	0.525537	0.261062	0.158868	0.198576
ENSMUSG00000042190	17.7731	27.641	38.3112	39.2867	37.4708	29.581	17.5182	12.8601	9.9206	9.78443	16.3725	11.4944	16.7857	9.98661	0.81676	2.2552e-06	2.3033e-05	Cmklr1	chr5	-	113612354	113650426	2882	protein_coding	chemokine-like_receptor_1	17	32	45	39	31	31	22	14	9	10	14	12	14	10	0.293425	0.452965	0.628931	0.638745	0.611884	0.479746	0.291965	0.199357	0.14998	0.150436
ENSMUSG00000022037	21685.3	24081.3	23927.5	22288.7	24843.1	23802.2	18151.3	10225.6	9128.05	11782.4	13179.9	9038.42	17601	11021.2	0.81641	1.6494e-10	3.1196e-09	Clu	chr14	+	65968483	65981548	1811	protein_coding	clusterin	20742	27879	28105	22126	20553	24944	22795	11132	8281	12042	11270	9436	14680	11036	569.736	628.012	625.1	576.688	645.592	614.315	481.419	252.262	219.608	288.288
ENSMUSG00000026395	47.0464	46.6441	41.7167	35.2573	31.4271	41.9859	38.2216	16.5345	13.2275	14.6766	29.2367	16.2837	22.7806	22.9692	0.81636	1.3324e-07	1.6948e-06	Ptprc	chr1	-	138063407	138175706	5186	protein_coding	protein_tyrosine_phosphatase_receptor_type_C	45	54	49	35	26	44	48	18	12	15	25	17	19	23	0.43164	0.424786	0.380582	0.318561	0.285195	0.378411	0.354006	0.142442	0.11113	0.125402
ENSMUSG00000036995	497.647	482.853	446.965	529.867	512.504	516.236	504.048	280.167	294.311	271.029	302.892	303.643	244.591	250.664	0.81464	1.2754e-39	1.4271e-37	Asap3	chr4	+	136206365	136245216	4225	protein_coding	ArfGAP_with_SH3_domain_ankyrin_repeat_and_PH_domain_3	476	559	525	526	424	541	633	305	267	277	259	317	204	251	5.60431	5.39752	5.00515	5.87646	5.70874	5.71102	5.73032	2.96258	3.03507	2.84249
ENSMUSG00000021187	7.31833	19.0032	23.8381	21.1544	18.131	13.3592	18.3145	4.5929	7.71602	8.80598	7.0168	4.78933	3.59693	5.99197	0.81368	6.9727e-06	6.4983e-05	Tc2n	chr12	-	101645443	101718523	5290	protein_coding	tandem_C2_domains_nuclear	7	22	28	21	15	14	23	5	7	9	6	5	3	6	0.065824	0.169659	0.2132	0.187379	0.161301	0.118036	0.166293	0.0387892	0.0635516	0.073762
ENSMUSG00000087150	152.639	123.521	145.583	138.007	164.388	146.951	214.2	60.6263	93.6945	96.8658	73.6764	91.9551	79.1325	77.8956	0.81364	3.1253e-12	7.2276e-11	BC064078	chr6	+	128992961	129008040	2290	pseudogene	cDNA_sequence_BC064078	146	143	171	137	136	154	269	66	85	99	63	96	66	78	3.17146	2.54747	3.00777	2.82385	3.37835	2.99936	4.49282	1.18278	1.78266	1.87433
ENSMUSG00000061048	40.7736	32.8237	59.5953	48.3529	55.6018	52.4824	37.4253	16.5345	8.81831	20.5473	25.7283	2.8736	34.7704	21.9705	0.81212	4.4009e-06	4.2587e-05	Cdh3	chr8	+	106510913	106556908	3973	protein_coding	cadherin_3	39	38	70	48	46	55	47	18	8	21	22	3	29	22	0.488301	0.390188	0.709682	0.570268	0.658629	0.61743	0.452461	0.185931	0.0967065	0.229164
ENSMUSG00000071350	581.285	566.64	490.384	519.793	454.485	566.81	539.084	309.562	372.573	277.878	283.011	288.317	258.979	279.625	0.80987	3.1136e-28	2.139e-26	Setdb2	chr14	-	59402009	59440884	3034	protein_coding	SET_domain_bifurcated_2	556	656	576	516	376	594	677	337	338	284	242	301	216	280	9.11593	8.82058	7.64701	8.02769	7.04975	8.73201	8.53444	4.55839	5.35039	4.05834
ENSMUSG00000001131	25.0914	31.0961	28.9463	44.3235	33.8446	35.3063	29.4625	10.1044	16.5343	9.78443	18.7115	19.1573	15.5867	14.9799	0.80922	6.8432e-07	7.6683e-06	Timp1	chrX	+	20870166	20874735	883	protein_coding	tissue_inhibitor_of_metalloproteinase_1	24	36	34	44	28	37	37	11	15	10	16	20	13	15	1.35205	1.66322	1.55097	2.35206	1.80384	1.86889	1.60267	0.511245	0.815859	0.491004
ENSMUSG00000005413	150.549	106.245	160.907	153.117	147.466	171.761	110.683	58.7892	48.5007	74.3616	88.8795	59.3877	112.704	73.9009	0.80541	1.5073e-09	2.5216e-08	Hmox1	chr8	+	75093591	75100596	1606	protein_coding	heme_oxygenase_(decycling)_1	144	123	189	152	122	180	139	64	44	76	76	62	94	74	4.46024	3.12441	4.74025	4.4674	4.32131	4.99885	3.31033	1.63543	1.31581	2.0517
ENSMUSG00000038387	334.552	301.459	353.315	263.926	333.611	312.986	303.384	198.413	144.4	192.753	188.284	154.216	176.25	169.772	0.80236	2.7682e-23	1.4094e-21	Rras	chr7	+	45017978	45021646	977	protein_coding	Harvey_rat_sarcoma_oncogene_subgroup_R	320	349	415	262	276	328	381	216	131	197	161	161	147	170	16.2929	14.5727	17.1095	12.6579	16.07	14.9735	14.9153	9.07311	6.43963	8.74213
ENSMUSG00000033220	20.9095	26.7772	20.4327	16.1176	10.8786	29.581	30.2588	11.023	9.9206	11.7413	8.18627	6.70506	4.79591	8.98795	0.80222	6.3991e-06	6.0057e-05	Rac2	chr15	-	78559169	78572783	3036	protein_coding	RAS-related_C3_botulinum_substrate_2	20	31	24	16	9	31	38	12	9	12	7	7	4	9	0.327695	0.416552	0.318415	0.248757	0.168633	0.455411	0.478723	0.16221	0.142372	0.171366
ENSMUSG00000055538	578.148	539.863	715.143	570.161	589.863	619.292	531.918	300.376	302.027	343.433	326.281	316.096	418.443	312.581	0.80168	5.8252e-26	3.5806e-24	Zcchc24	chr14	-	25711642	25769039	4556	protein_coding	zinc_finger_CCHC_domain_containing_24	553	625	840	566	488	649	668	327	274	351	279	330	349	313	6.03786	5.59635	7.42643	5.86394	6.09309	6.35337	5.60783	2.94551	2.88836	3.34017
ENSMUSG00000027412	42.8645	61.3284	66.4062	65.4778	45.932	74.4296	54.1473	32.1503	24.2503	14.6766	38.5924	22.9888	38.3673	31.9572	0.80044	1.1986e-07	1.5319e-06	Lpin3	chr2	+	160880670	160906002	3470	protein_coding	lipin_3	41	71	78	65	38	78	68	35	22	15	33	24	32	32	0.587755	0.834714	0.905419	0.88418	0.622953	1.00256	0.749517	0.413938	0.304493	0.187416
ENSMUSG00000020393	1948.77	1918.46	1856.82	1875.69	1733.33	1838.79	1770.14	1030.65	1020.72	1050.85	1058.37	1005.76	1055.1	1164.44	0.79966	9.3421e-89	3.8793e-86	Kremen1	chr11	-	5191552	5261558	4856	protein_coding	kringle_containing_transmembrane_protein_1	1864	2221	2181	1862	1434	1927	2223	1122	926	1074	905	1050	880	1166	19.0945	18.6586	18.091	18.0991	16.7986	17.6989	17.5091	9.48225	9.15834	9.58896
ENSMUSG00000059089	7.31833	12.9567	14.4731	13.0956	7.25241	8.58803	11.9443	2.75574	1.10229	3.91377	4.67787	0	4.79591	1.99732	0.79841	9.0977e-06	8.2886e-05	Fcgr4	chr1	+	171018920	171029761	1256	protein_coding	Fc_receptor_IgG_low_affinity_IV	7	15	17	13	6	9	15	3	1	4	4	0	4	2	0.277236	0.487204	0.545185	0.488551	0.271746	0.319592	0.456776	0.0980231	0.038238	0.138075
ENSMUSG00000033880	570.83	652.154	645.332	561.095	693.814	537.229	553.417	277.411	188.491	374.743	402.297	204.983	423.239	233.687	0.79573	6.3671e-08	8.444e-07	Lgals3bp	chr11	-	118392751	118402092	2330	protein_coding	lectin_galactoside-binding_soluble_3_binding_protein	546	755	758	557	574	563	695	302	171	383	344	214	353	234	11.6568	13.219	13.1038	11.2838	14.0138	10.7769	11.4086	5.31922	3.52472	7.1267
ENSMUSG00000001025	331.416	283.32	325.22	297.169	247.791	354.972	230.922	65.2192	60.6259	48.9221	64.3207	51.7247	278.163	44.9397	0.794	1.2063e-05	0.00010653	S100a6	chr3	+	90612894	90614414	719	protein_coding	S100_calcium_binding_protein_A6_(calcyclin)	317	328	382	295	205	372	290	71	55	50	55	54	232	45	21.9317	18.6103	21.4003	19.3664	16.2191	23.0758	15.4266	4.05253	3.67382	3.015
ENSMUSG00000005373	20.9095	24.1859	22.1354	27.1985	16.9223	27.6725	17.5182	5.51149	3.30687	12.7198	12.8641	4.78933	8.39284	14.9799	0.7915	8.6522e-06	7.9059e-05	Mlxipl	chr5	+	135106891	135138382	3638	protein_coding	MLX_interacting_protein-like	20	28	26	27	14	29	22	6	3	13	11	5	7	15	0.27347	0.313982	0.287869	0.350314	0.218911	0.355532	0.231293	0.0676839	0.0396044	0.154927
ENSMUSG00000038147	35.5462	39.7339	16.1759	27.1985	32.6359	20.0387	19.1108	11.023	7.71602	6.8491	11.6947	14.368	11.9898	14.9799	0.78985	6.8219e-06	6.3801e-05	Cd84	chr1	+	171839697	171890718	3434	protein_coding	CD84_antigen	34	46	19	27	27	21	24	12	7	7	10	15	10	15	0.492516	0.54647	0.222863	0.371125	0.447265	0.272748	0.267309	0.14341	0.0978999	0.0883779
ENSMUSG00000032845	200.731	195.214	216.246	201.47	226.034	237.602	191.108	117.578	132.275	135.025	134.489	90.0393	93.5203	111.85	0.7886	2.361e-17	8.5004e-16	Alpk2	chr18	-	65265529	65393888	7249	protein_coding	alpha-kinase_2	192	226	254	200	187	249	240	128	120	138	115	94	78	112	1.31754	1.27186	1.41137	1.30229	1.46746	1.53202	1.2663	0.724651	0.795037	0.825366
ENSMUSG00000029713	3355.98	3034.46	3053.83	2942.47	3128.21	2981.95	3176.38	1811.44	1528.87	1922.64	1717.95	1731.82	1919.56	1806.58	0.78743	3.0917e-64	7.0453e-62	Gnb2	chr5	-	137528127	137533510	1860	protein_coding	guanine_nucleotide_binding_protein_(G_protein)_beta_2	3210	3513	3587	2921	2588	3125	3989	1972	1387	1965	1469	1808	1601	1809	85.8487	77.0503	77.6789	74.1268	79.1503	74.9343	82.0263	43.5102	35.8136	45.8031
ENSMUSG00000034401	451.646	471.624	296.274	374.735	320.315	358.789	387.79	189.228	229.276	212.322	226.877	211.688	197.831	218.707	0.78641	4.149e-18	1.579e-16	Spata6	chr4	+	111719984	111829184	2466	protein_coding	spermatogenesis_associated_6	432	546	348	372	265	376	487	206	208	217	194	221	165	219	8.7143	9.03251	5.68422	7.12043	6.113	6.80046	7.55332	3.42824	4.05093	3.81516
ENSMUSG00000056144	64.8195	45.7804	68.9602	41.3014	37.4708	38.169	41.4068	26.6388	26.4549	25.4395	33.9145	10.5365	20.3826	15.9786	0.78453	1.5758e-06	1.6515e-05	Trim34a	chr7	+	104244457	104340693	2590	protein_coding	tripartite_motif-containing_34A	62	53	81	41	31	40	52	29	24	26	29	11	17	16	1.19079	0.834805	1.25971	0.747207	0.680869	0.688817	0.767902	0.45951	0.445037	0.43523
ENSMUSG00000024235	60.6376	92.4245	52.7844	48.3529	53.1844	63.9331	78.0358	32.1503	47.3984	21.5257	31.5756	16.2837	32.3724	38.9478	0.78393	5.4758e-07	6.239e-06	Map3k8	chr18	-	4331327	4353015	2507	protein_coding	mitogen-activated_protein_kinase_kinase_kinase_8	58	107	62	48	44	67	98	35	43	22	27	17	27	39	1.15084	1.74116	0.996143	0.90374	0.998389	1.19197	1.49511	0.572942	0.823756	0.380464
ENSMUSG00000040483	161.003	134.75	137.069	127.934	119.665	88.7429	126.609	72.5679	50.7053	94.9089	52.626	47.8933	94.7192	51.9304	0.78351	1.0801e-08	1.5929e-07	Xaf1	chr11	+	72301629	72313733	2597	protein_coding	XIAP_associated_factor_1	154	156	161	127	99	93	159	79	46	97	45	50	79	52	2.94979	2.45054	2.49711	2.30828	2.16853	1.59718	2.34168	1.2484	0.850688	1.61937
ENSMUSG00000069516	95.1383	106.245	125.15	103.757	135.378	146.951	108.295	60.6263	33.0687	74.3616	86.5406	23.9466	53.954	72.9023	0.7823	3.386e-07	4.0274e-06	Lyz2	chr10	-	117277334	117282274	1266	protein_coding	lysozyme_2	91	123	147	103	112	154	136	66	30	76	74	25	45	73	3.5756	3.96351	4.67701	3.84026	5.03252	5.42538	4.10873	2.13948	1.13808	2.60271
ENSMUSG00000023484	202.822	204.716	200.07	210.536	170.432	231.877	174.386	99.2067	113.536	133.068	98.2352	115.902	109.107	111.85	0.78103	4.0961e-18	1.562e-16	Prph	chr15	+	99055174	99058978	1865	protein_coding	peripherin	194	237	235	209	141	243	219	108	103	136	84	121	91	112	5.17446	5.18416	5.07544	5.28962	4.30072	5.81127	4.49125	2.37652	2.65242	3.16159
ENSMUSG00000073002	71.0924	49.2355	61.298	49.3602	72.5241	38.169	56.5362	28.476	18.7389	22.5042	23.3893	36.3989	38.3673	30.9585	0.77895	1.929e-07	2.3951e-06	Vamp5	chr6	-	72368049	72380468	1648	protein_coding	vesicle-associated_membrane_protein_5	68	57	72	49	60	40	71	31	17	23	20	38	32	31	2.05255	1.411	1.75979	1.40345	2.07107	1.08255	1.6478	0.771972	0.495423	0.605085
ENSMUSG00000035673	1272.34	1040.86	1159.55	1186.66	1130.17	1261.49	1196.02	683.424	719.794	590.979	687.647	710.736	667.831	691.073	0.77862	8.3742e-50	1.3726e-47	Sbno2	chr10	-	80057416	80102698	4227	protein_coding	strawberry_notch_homolog_2_(Drosophila)	1217	1205	1362	1178	935	1322	1502	744	653	604	588	742	557	692	14.3219	11.6296	12.9786	13.1544	12.5829	13.949	13.5906	7.22333	7.41934	6.19513
ENSMUSG00000036353	156.821	155.48	152.394	155.132	116.039	129.775	110.683	87.2652	73.8533	83.1676	77.1848	65.1348	52.755	91.8768	0.77744	6.946e-12	1.5397e-10	P2ry12	chr3	-	59216271	59262831	2338	protein_coding	purinergic_receptor_P2Y_G-protein_coupled_12	150	180	179	154	96	136	139	95	67	85	66	68	44	92	3.19145	3.14078	3.08385	3.10909	2.33576	2.5944	2.27391	1.66754	1.37631	1.57623
ENSMUSG00000064215	270.778	246.177	249.449	187.367	244.165	220.426	234.904	124.927	89.2854	173.184	129.811	74.7135	178.648	114.846	0.77534	9.7918e-10	1.6942e-08	Ifi27	chr12	+	103434211	103440239	977	protein_coding	interferon_alpha-inducible_protein_27	259	285	293	186	202	231	295	136	81	177	111	78	149	115	13.187	11.9003	12.0797	8.98618	11.7614	10.5453	11.5486	5.7127	3.98176	7.85461
ENSMUSG00000070604	291.688	214.218	210.286	277.022	258.669	253.824	247.644	166.263	134.479	120.348	142.675	142.722	141.479	138.814	0.77268	1.6072e-18	6.2439e-17	Vsig10l	chr7	+	43463151	43471913	3730	protein_coding	ZV-set_and_immunoglobulin_domain_containing_10_like	279	248	247	275	214	266	311	181	122	123	122	149	118	139	3.72081	2.71239	2.6673	3.48001	3.26367	3.18065	3.18899	1.99144	1.57085	1.42969
ENSMUSG00000009418	4340.82	4590.99	3706.83	4078.77	3890.92	4492.49	4559.52	2373.61	2626.75	2173.12	2527.22	2687.77	2459.1	2308.9	0.77181	7.9128e-45	1.0793e-42	Nav1	chr1	-	135434580	135607295	13117	protein_coding	neuron_navigator_1	4152	5315	4354	4049	3219	4708	5726	2584	2383	2221	2161	2806	2051	2312	15.7458	16.5302	13.3702	14.5703	13.9601	16.0083	16.6962	8.08453	8.72517	7.34108
ENSMUSG00000035200	233.141	224.583	162.61	201.47	201.859	218.518	191.904	130.438	89.2854	123.284	134.489	66.0927	111.505	129.826	0.77174	1.6596e-11	3.5564e-10	Chrnb4	chr9	-	55028156	55048544	3486	protein_coding	cholinergic_receptor_nicotinic_beta_polypeptide_4	223	260	191	200	167	229	241	142	81	126	115	69	93	130	3.18214	3.04267	2.20694	2.70807	2.72515	2.92989	2.64418	1.6717	1.11594	1.56707
ENSMUSG00000028480	53.3193	37.1426	39.1626	58.4264	50.7669	49.6197	40.6105	24.8017	25.3526	22.5042	21.0504	25.8624	21.5816	25.9652	0.77002	1.0845e-07	1.3946e-06	Glipr2	chr4	+	43957401	43979118	2320	protein_coding	GLI_pathogenesis-related_2	51	43	46	58	42	52	51	27	23	23	18	27	18	26	1.09351	0.756118	0.798646	1.18004	1.02982	0.999675	0.840784	0.477609	0.476129	0.429819
ENSMUSG00000018774	77.3652	66.5111	57.0412	58.4264	44.7232	63.9331	42.203	47.7662	25.3526	23.4826	32.7451	13.4101	21.5816	33.9545	0.76784	1.5937e-06	1.6665e-05	Cd68	chr11	-	69664213	69666153	1230	protein_coding	CD68_antigen	74	77	67	58	37	67	53	52	23	24	28	14	18	34	2.99274	2.55384	2.19409	2.22577	1.71119	2.42948	1.64806	1.73498	0.898064	0.845964
ENSMUSG00000024300	39.7281	28.5048	27.2436	27.1985	26.5922	41.9859	27.8699	12.8601	8.81831	15.6551	28.0672	11.4944	13.1888	10.9853	0.76694	5.6542e-06	5.3469e-05	Myo1f	chr17	+	33555719	33607764	3819	protein_coding	myosin_IF	38	33	32	27	22	44	35	14	8	16	24	12	11	11	0.494966	0.352511	0.337509	0.333711	0.327698	0.513862	0.350526	0.150444	0.100606	0.181642
ENSMUSG00000091230	23.0005	19.867	19.5813	18.1323	24.1747	16.2218	23.0922	6.43007	5.51144	10.7629	7.0168	13.4101	7.19387	10.9853	0.76357	1.2912e-05	0.00011301	Gm6970	chr19	-	47170469	47171134	666	protein_coding	predicted_gene_6970	22	23	23	18	20	17	29	7	5	11	6	14	6	11	1.6432	1.40884	1.39104	1.27572	1.70827	1.13846	1.66543	0.431341	0.360562	0.716084
ENSMUSG00000032269	111.866	98.471	96.2038	81.5955	90.6552	92.5598	74.8507	52.3591	59.5236	50.879	40.9314	48.8511	55.153	47.9357	0.75951	6.2166e-11	1.2397e-09	Htr3a	chr9	-	48899214	48911099	2082	protein_coding	5-hydroxytryptamine_(serotonin)_receptor_3A	107	114	113	81	75	97	94	57	54	52	35	51	46	48	2.55649	2.23374	2.18616	1.83637	2.04919	2.07795	1.72683	1.12355	1.24565	1.08285
ENSMUSG00000042228	103.502	101.926	131.11	96.7057	82.194	97.331	98.7392	54.1963	34.1709	66.5341	57.3039	39.2725	57.5509	74.8996	0.75891	5.0822e-09	7.8614e-08	Lyn	chr4	+	3678115	3813122	3463	protein_coding	Yamaguchi_sarcoma_viral_(v-yes-1)_oncogene_homolog	99	118	154	96	68	102	124	59	31	68	49	41	48	75	1.42208	1.39008	1.79124	1.3085	1.11701	1.31368	1.36953	0.699192	0.429926	0.851338
ENSMUSG00000079227	29.2733	32.8237	35.7572	27.1985	30.2184	27.6725	16.722	15.6159	19.8412	13.6982	3.5084	13.4101	14.3877	6.99063	0.75866	1.2763e-05	0.00011191	Ccr5	chr9	+	124121543	124147699	2925	protein_coding	chemokine_(C-C_motif)_receptor_5	28	38	42	27	25	29	21	17	18	14	3	14	12	7	0.476183	0.529989	0.578373	0.435707	0.486201	0.442197	0.274597	0.238517	0.29555	0.207514
ENSMUSG00000067206	347.098	262.589	320.112	290.117	279.218	315.849	317.717	163.507	195.105	157.529	156.709	181.994	171.454	200.731	0.75841	6.2728e-22	2.9599e-20	Lrrc66	chr5	-	73606643	73632505	3176	protein_coding	leucine_rich_repeat_containing_66	332	304	376	288	231	331	399	178	177	161	134	190	143	201	5.19995	3.90483	4.76861	4.28024	4.13745	4.64826	4.80501	2.30005	2.67656	2.19781
ENSMUSG00000071068	11.5002	8.6378	8.51361	9.06616	10.8786	9.54225	5.57399	0.918581	2.20458	2.93533	1.16947	3.83146	2.39796	1.99732	0.75813	2.2289e-05	0.00018536	Treml2	chr17	+	48300038	48312534	4509	protein_coding	triggering_receptor_expressed_on_myeloid_cells-like_2	11	10	10	9	9	10	7	1	2	3	1	4	2	2	0.121354	0.090475	0.0893314	0.0942148	0.113544	0.0989152	0.0593772	0.00910158	0.0213027	0.0288461
ENSMUSG00000089989	51.2283	39.7339	44.2708	46.3382	32.6359	42.9401	39.8142	21.1274	25.3526	26.4179	12.8641	17.2416	28.7755	19.9732	0.75766	4.7283e-07	5.4707e-06	Flt3l	chr7	-	45131188	45136432	2482	protein_coding	FMS-like_tyrosine_kinase_3_ligand	49	46	52	46	27	45	50	23	23	27	11	18	24	20	0.982056	0.756075	0.843891	0.874808	0.618819	0.808638	0.770496	0.380297	0.445052	0.471637
ENSMUSG00000022032	97.2293	128.703	87.6902	112.823	87.029	108.782	93.9615	53.2777	56.2167	39.1377	70.168	45.9775	46.7601	77.8956	0.75525	3.579e-09	5.6724e-08	Scara5	chr14	+	65666403	65764826	3794	protein_coding	scavenger_receptor_class_A_member_5_(putative)	93	149	103	112	72	114	118	58	51	40	60	48	39	78	1.21935	1.60213	1.09351	1.3934	1.07953	1.34014	1.18956	0.627376	0.645591	0.457097
ENSMUSG00000022912	476.737	529.497	590.845	700.109	742.164	625.972	513.603	245.261	177.468	406.054	336.807	374.525	371.683	281.622	0.75453	1.1087e-07	1.4238e-06	Pros1	chr16	+	62854307	62929346	3303	protein_coding	protein_S_(alpha)	456	613	694	695	614	656	645	267	161	415	288	391	310	282	6.86749	7.57113	8.46322	9.93191	10.5745	8.85806	7.46884	3.31741	2.341	5.44735
ENSMUSG00000023367	295.87	363.652	350.761	336.455	378.334	332.07	313.736	179.123	138.888	201.559	260.791	133.143	236.199	184.752	0.75343	1.7252e-12	4.1067e-11	Tmem176a	chr6	+	48841483	48845364	1064	protein_coding	transmembrane_protein_176A	283	421	412	334	313	348	394	195	126	206	223	139	197	185	13.2308	16.1417	15.597	14.817	16.7342	14.5875	14.163	7.52125	5.68739	8.39405
ENSMUSG00000016918	2067.95	1915.87	2288.46	2255.46	2219.24	2251.97	2164.3	928.685	1188.27	1407	1295.77	1275.88	1519.1	1196.4	0.7507	1.541e-24	8.5958e-23	Sulf1	chr1	+	12692277	12861192	5598	protein_coding	sulfatase_1	1978	2218	2688	2239	1836	2360	2718	1011	1078	1438	1108	1332	1267	1198	17.5766	16.1636	19.3411	18.8789	18.657	18.8028	18.5703	7.41166	9.24848	11.1371
ENSMUSG00000055653	280.188	279.001	254.557	232.698	230.869	257.641	224.552	140.543	128.968	160.465	177.759	115.902	157.066	132.822	0.75039	1.7108e-17	6.2195e-16	Gpc3	chrX	-	52272426	52613950	2216	protein_coding	glypican_3	268	323	299	231	191	270	282	153	117	164	152	121	131	133	6.01599	5.94623	5.43483	4.92038	4.90303	5.43422	4.86722	2.83347	2.53572	3.20863
ENSMUSG00000042686	140.094	131.295	105.569	120.882	126.917	98.2852	95.5541	88.1838	60.6259	66.5341	60.8123	59.3877	62.3468	53.9277	0.74897	1.3169e-10	2.5136e-09	Jph1	chr1	-	16964560	17097889	4809	protein_coding	junctophilin_1	134	152	124	120	105	103	120	96	55	68	52	62	52	54	1.38609	1.28943	1.03861	1.17783	1.24204	0.955269	0.954396	0.819244	0.549278	0.613056
ENSMUSG00000064246	506.01	500.129	418.018	466.404	472.616	472.341	391.772	268.226	232.583	280.813	367.213	169.542	233.801	275.63	0.74879	3.5456e-13	9.051e-12	Chil1	chr1	+	134182176	134190181	1839	protein_coding	chitinase-like_1	484	579	491	463	391	495	492	292	211	287	314	177	195	276	13.092	12.8442	10.7544	11.8838	12.0947	12.0051	10.2326	6.51626	5.51043	6.76622
ENSMUSG00000037490	75.2743	99.3348	69.8116	57.419	55.6018	96.3767	64.499	33.9875	31.9664	43.0515	38.5924	27.7781	59.9489	37.9491	0.74779	2.7826e-07	3.3546e-06	Slc2a12	chr10	+	22645011	22704285	4167	protein_coding	solute_carrier_family_2_(facilitated_glucose_transporter)_member_12	72	115	82	57	46	101	81	37	29	44	33	29	50	38	0.85951	1.12586	0.792638	0.645666	0.627965	1.08104	0.74347	0.364397	0.33424	0.457799
ENSMUSG00000075256	1250.39	1227.43	1022.48	1231.99	1015.34	1205.19	1212.74	662.297	833.33	631.095	620.987	681.042	645.05	709.049	0.74617	6.439e-30	4.7936e-28	Cerkl	chr2	-	79330543	79456785	2604	protein_coding	ceramide_kinase-like	1196	1421	1201	1223	840	1263	1523	721	756	645	531	711	538	710	22.8471	22.2619	18.5775	22.1688	18.3502	21.6324	22.3697	11.363	13.9433	10.739
ENSMUSG00000030124	107.684	158.072	132.812	134.985	106.369	182.257	139.35	85.428	61.7282	71.4263	56.1344	89.0815	86.3264	82.8889	0.74528	5.6498e-10	1.0112e-08	Lag3	chr6	-	124904361	124911705	2001	protein_coding	lymphocyte-activation_gene_3	103	183	156	134	88	191	175	93	56	73	48	93	72	83	2.56054	3.73089	3.14023	3.16093	2.50171	4.25725	3.34498	1.90736	1.34408	1.58169
ENSMUSG00000031207	1154.21	1133.28	1139.97	1065.78	1154.34	1118.35	1011.28	637.495	582.008	650.664	682.969	649.433	687.014	706.053	0.74513	6.2649e-55	1.1945e-52	Msn	chrX	+	96096042	96168552	3842	protein_coding	moesin	1104	1312	1339	1058	955	1172	1270	694	528	665	584	678	573	707	14.294	13.9311	14.0381	12.9983	14.1399	13.6055	12.6429	7.41309	6.60026	7.5043
ENSMUSG00000016206	49.1374	44.9166	49.3789	32.2352	56.8106	40.0775	35.8328	28.476	12.1252	17.612	31.5756	17.2416	16.7857	28.9612	0.74448	2.7734e-06	2.7817e-05	H2-M3	chr17	+	37270220	37274484	1438	protein_coding	histocompatibility_2_M_region_locus_3	47	52	58	32	47	42	45	31	11	18	27	18	14	29	1.62585	1.47521	1.62463	1.05038	1.85926	1.30267	1.19689	0.884708	0.367382	0.542699
ENSMUSG00000092168	6.27286	9.50158	1.70272	6.04411	3.62621	9.54225	6.37027	0	0	0	0	0	0	0	0.74422	1.111e-06	1.2021e-05	Gm9075	chr12	+	3082667	3087041	794	pseudogene	predicted_gene_9075	6	11	2	6	3	10	8	0	0	0	0	0	0	0	0.3759	0.565173	0.10146	0.356687	0.214933	0.561724	0.385364	0	0	0
ENSMUSG00000078853	131.73	133.886	141.326	117.86	142.631	138.363	135.368	73.4865	51.8076	79.2538	87.71	63.2191	86.3264	92.8755	0.74395	1.1138e-12	2.6947e-11	Igtp	chr11	+	58199556	58207591	2022	protein_coding	interferon_gamma_induced_GTPase	126	155	166	117	118	145	170	80	47	81	75	66	72	93	3.09978	3.12723	3.30683	2.73125	3.31973	3.19838	3.21566	1.6237	1.11635	1.7368
ENSMUSG00000030088	381.599	376.608	380.558	312.279	367.456	431.31	433.178	215.867	214.946	226.999	260.791	222.225	203.826	222.701	0.74372	4.1879e-23	2.1037e-21	Aldh1l1	chr6	+	90486427	90600203	4175	protein_coding	aldehyde_dehydrogenase_1_family_member_L1	365	436	447	310	304	452	544	235	195	232	223	232	170	223	4.34889	4.26029	4.31256	3.50479	4.14208	4.82865	4.98361	2.30998	2.24317	2.40922
ENSMUSG00000028859	42.8645	31.9599	49.3789	63.4631	47.1407	47.7113	48.5733	26.6388	33.0687	24.4611	23.3893	23.9466	19.1836	20.9719	0.74195	5.8381e-07	6.6357e-06	Csf3r	chr4	+	126024550	126044440	3481	protein_coding	colony_stimulating_factor_3_receptor_(granulocyte)	41	37	58	63	39	50	61	29	30	25	20	25	16	21	0.585897	0.433617	0.671133	0.854266	0.637326	0.640633	0.670236	0.341894	0.413906	0.311374
ENSMUSG00000022906	187.14	190.032	168.569	148.081	215.155	141.225	174.386	104.718	110.229	101.758	73.6764	89.0815	111.505	104.859	0.74121	4.3049e-13	1.09e-11	Parp9	chr16	+	35938470	35972605	3548	protein_coding	poly_(ADP-ribose)_polymerase_family_member_9	179	220	198	147	178	148	219	114	100	104	63	93	93	105	2.50964	2.52958	2.24784	1.95565	2.85389	1.86046	2.36082	1.31862	1.35363	1.27085
ENSMUSG00000056174	59.5921	79.4678	182.191	108.794	116.039	111.644	89.9801	22.0459	14.3297	28.3748	65.4902	20.1152	75.5356	20.9719	0.74061	4.5537e-05	0.00035425	Col8a2	chr4	+	126286793	126314330	4332	protein_coding	collagen_type_VIII_alpha_2	57	92	214	108	96	117	113	24	13	29	56	21	63	21	0.654528	0.86638	1.9898	1.17677	1.26062	1.20459	0.997682	0.227363	0.144125	0.290239
ENSMUSG00000032596	126.503	95.0158	83.4334	86.6322	96.6988	80.1549	82.8135	51.4405	44.0915	72.4047	21.0504	38.3146	56.352	57.9223	0.73997	3.1762e-07	3.7899e-06	Uba7	chr9	+	107975505	107984060	3620	protein_coding	ubiquitin-like_modifier_activating_enzyme_7	121	110	98	86	80	84	104	56	40	74	18	40	47	58	1.66272	1.23963	1.09044	1.12136	1.25714	1.03494	1.09882	0.634858	0.530684	0.886276
ENSMUSG00000024013	28.2278	41.4615	25.5408	20.147	30.2184	30.5352	39.8142	10.1044	11.0229	15.6551	7.0168	17.2416	20.3826	19.9732	0.73951	1.3443e-05	0.000117	Fgd2	chr17	+	29360914	29379660	2808	protein_coding	FYVE_RhoGEF_and_PH_domain_containing_2	27	48	30	20	25	32	50	11	10	16	6	18	17	20	0.478309	0.697354	0.430337	0.336194	0.506459	0.508272	0.681044	0.160765	0.171036	0.247041
ENSMUSG00000078920	24.0459	24.1859	17.0272	15.1103	31.4271	13.3592	15.1294	8.26723	4.40915	5.87066	12.8641	6.70506	10.7908	8.98795	0.73702	3.8873e-05	0.00030662	Ifi47	chr11	+	49076587	49096974	1766	protein_coding	interferon_gamma_inducible_protein_47	23	28	20	15	26	14	19	9	4	6	11	7	9	9	0.647857	0.646809	0.456167	0.40092	0.837498	0.353574	0.411495	0.209146	0.108781	0.147301
ENSMUSG00000036098	59.5921	72.5576	103.015	77.5661	73.7329	87.7887	58.925	27.5574	34.1709	48.9221	44.4398	41.1882	46.7601	45.9384	0.73641	7.6308e-08	1.0042e-06	Myrf	chr19	-	10208272	10240748	5674	protein_coding	myelin_regulatory_factor	57	84	121	77	61	92	74	30	31	50	38	43	39	46	0.499721	0.603947	0.858975	0.640557	0.611564	0.723172	0.498821	0.216985	0.262396	0.382055
ENSMUSG00000056880	61.6831	46.6441	48.5276	39.2867	22.966	27.6725	38.2216	21.1274	22.0458	22.5042	17.542	10.5365	8.39284	29.9598	0.73098	2.0978e-05	0.00017594	Gadl1	chr9	+	115909455	116076176	3652	protein_coding	glutamate_decarboxylase-like_1	59	54	57	39	19	29	48	23	20	23	15	11	7	30	0.803643	0.603215	0.628679	0.50407	0.295954	0.354169	0.502704	0.25846	0.263017	0.27305
ENSMUSG00000019975	1438.57	1439.06	1339.19	1248.11	1174.89	1330.19	1165.76	775.282	832.228	770.034	767.17	713.61	775.739	819.901	0.72769	2.9862e-40	3.4233e-38	Ikbip	chr10	+	91082940	91102607	3232	protein_coding	IKBKB_interacting_protein	1376	1666	1573	1239	972	1394	1464	844	755	787	656	745	647	821	21.1782	21.0287	19.6039	18.0949	17.1079	19.2369	17.3249	10.7169	11.2192	10.5572
ENSMUSG00000026712	49.1374	53.5544	28.9463	39.2867	49.5582	41.0317	47.777	23.8831	3.30687	18.5904	31.5756	2.8736	21.5816	24.9665	0.72543	5.7088e-05	0.00043487	Mrc1	chr2	+	14229414	14332057	5352	protein_coding	mannose_receptor_C_type_1	47	62	34	39	41	43	60	26	3	19	27	3	18	25	0.436841	0.47259	0.255886	0.343958	0.435782	0.35834	0.428783	0.199367	0.0269209	0.153916
ENSMUSG00000070469	36.5917	44.9166	26.3922	25.1838	51.9756	39.1232	48.5733	18.3716	12.1252	8.80598	30.4061	15.3258	25.1785	20.9719	0.72407	1.9223e-05	0.00016254	Adamtsl3	chr7	+	82335694	82614450	7249	protein_coding	ADAMTS-like_3	35	52	31	25	43	41	61	20	11	9	26	16	21	21	0.240177	0.29264	0.172254	0.162787	0.337436	0.25226	0.32185	0.113227	0.0728784	0.0538282
ENSMUSG00000023031	39.7281	56.1457	69.8116	62.4558	54.3931	62.9789	64.499	35.8247	9.9206	10.7629	33.9145	19.1573	55.153	25.9652	0.72406	2.955e-05	0.00023997	Cela1	chr15	-	100674425	100687920	1103	protein_coding	chymotrypsin-like_elastase_family_member_1	38	65	82	62	45	66	81	39	9	11	29	20	46	26	1.71376	2.40407	2.99449	2.65322	2.3208	2.66877	2.80874	1.45106	0.391879	0.432377
ENSMUSG00000030560	608.467	563.185	547.425	487.558	518.548	550.588	530.325	322.422	263.447	353.218	394.11	262.455	294.949	357.521	0.72263	5.3038e-20	2.24e-18	Ctsc	chr7	+	88278085	88310888	3209	protein_coding	cathepsin_C	582	652	643	484	429	577	666	351	239	361	337	274	246	358	9.02184	8.28871	8.07097	7.11922	7.60482	8.01954	7.93792	4.48884	3.57695	4.87734
ENSMUSG00000074457	703.605	687.569	850.51	786.741	860.62	779.602	658.527	418.873	362.653	461.825	499.362	438.702	513.163	463.379	0.72181	1.7175e-22	8.3145e-21	S100a16	chr3	+	90537254	90543151	1127	protein_coding	S100_calcium_binding_protein_A16	673	796	999	781	712	817	827	456	329	472	427	458	428	464	29.7052	28.8136	35.7048	32.7102	35.9383	32.3327	28.0662	16.605	14.0203	18.1578
ENSMUSG00000042622	47.0464	38.8701	96.2038	63.4631	102.743	78.2465	43.7956	33.0689	15.432	37.1808	35.084	30.6517	40.7652	37.9491	0.72093	1.3969e-05	0.0001214	Maff	chr15	+	79347541	79359072	1933	protein_coding	v-maf_musculoaponeurotic_fibrosarcoma_oncogene_family_protein_F_(avian)	45	45	113	63	85	82	55	36	14	38	30	32	34	38	1.15804	0.949707	2.35468	1.53839	2.50143	1.89202	1.08826	0.764307	0.347841	0.85231
ENSMUSG00000004707	8.36381	13.8205	17.0272	13.0956	13.2961	5.72535	13.5368	0	1.10229	5.87066	3.5084	1.91573	3.59693	7.98929	0.71868	6.1205e-05	0.00046172	Ly9	chr1	-	171588624	171607410	2488	protein_coding	lymphocyte_antigen_9	8	16	20	13	11	6	17	0	1	6	3	2	3	8	0.159949	0.262348	0.323791	0.246632	0.251503	0.107558	0.261337	0	0.0193034	0.104555
ENSMUSG00000006403	97.2293	113.155	128.556	78.5734	124.5	119.278	166.423	62.4635	41.887	60.6634	68.9986	49.809	382.474	77.8956	0.71825	2.4324e-07	2.9688e-06	Adamts4	chr1	+	171250421	171260637	4389	protein_coding	a_disintegrin-like_and_metallopeptidase_(reprolysin_type)_with_thrombospondin_type_1_motif_4	93	131	151	78	103	125	209	68	38	62	59	52	319	78	1.05404	1.21763	1.38579	0.838853	1.33497	1.27025	1.82131	0.635829	0.415817	0.612452
ENSMUSG00000002983	112.911	70.83	104.717	75.5513	77.3591	107.827	93.1652	61.5449	35.2732	60.6634	49.1176	46.9354	53.954	50.9317	0.71669	2.266e-08	3.2029e-07	Relb	chr7	-	19606217	19629438	3273	protein_coding	avian_reticuloendotheliosis_viral_(v-rel)_oncogene_related_B	108	82	123	75	64	113	117	67	32	62	42	49	45	51	1.64142	1.02206	1.51371	1.08161	1.11233	1.53984	1.36723	0.84009	0.469557	0.82128
ENSMUSG00000030339	336.643	291.094	341.396	307.242	311.854	283.405	300.199	172.693	117.945	220.15	231.555	161.879	181.046	183.754	0.71583	1.6063e-13	4.2455e-12	Ltbr	chr6	-	125306571	125313885	2107	protein_coding	lymphotoxin_B_receptor	322	337	401	305	258	297	377	188	107	225	198	169	151	184	7.60209	6.52491	7.66592	6.83269	6.96557	6.28688	6.84351	3.66176	2.43895	4.62982
ENSMUSG00000003617	6881.32	6994.89	6328.17	5886.96	6247.95	6381.86	5890.91	3613.7	3290.33	3752.33	4411.23	3010.57	4589.69	3938.72	0.71539	3.8874e-23	1.9579e-21	Cp	chr3	+	19957054	20009145	4564	protein_coding	ceruloplasmin	6582	8098	7433	5844	5169	6688	7398	3934	2985	3835	3772	3143	3828	3944	71.7388	72.3837	65.5999	60.4395	64.4262	65.3573	61.997	35.3741	31.4111	36.4305
ENSMUSG00000037736	2978.56	2714	2803.53	2693.66	2632.63	2670.88	2733.64	1611.19	1710.75	1602.69	1685.2	1611.13	1799.67	1643.8	0.71508	2.2862e-85	8.7182e-83	Limch1	chr5	+	66745835	67057159	5904	protein_coding	LIM_and_calponin_homology_domains_1	2849	3142	3293	2674	2178	2799	3433	1754	1552	1638	1441	1682	1501	1646	24.0042	21.7104	22.4662	21.3782	20.9852	21.1446	22.2397	12.1921	12.625	12.0286
ENSMUSG00000020437	126.503	94.1521	130.258	133.978	112.412	114.507	106.702	71.6493	70.5465	74.3616	50.2871	51.7247	76.7346	73.9009	0.71498	1.73e-10	3.2653e-09	Myo1g	chr11	-	6506548	6520965	4752	protein_coding	myosin_IG	121	109	153	133	93	120	134	78	64	76	43	54	64	74	1.26663	0.935748	1.29688	1.32109	1.11329	1.12628	1.07853	0.67362	0.646827	0.693398
ENSMUSG00000030157	121.275	114.019	114.934	80.5881	97.9076	110.69	144.127	67.975	49.603	62.6203	66.6596	59.3877	69.5407	72.9023	0.71482	1.0809e-09	1.8616e-08	Clec2d	chr6	+	129180615	129186534	1213	protein_coding	C-type_lectin_domain_family_2_member_d	116	132	135	80	81	116	181	74	45	64	57	62	58	73	4.75706	4.43938	4.48288	3.11305	3.79862	4.26521	5.70716	2.50362	1.78171	2.28752
ENSMUSG00000020407	12.5457	6.91024	18.7299	10.0735	13.2961	13.3592	10.3517	0.918581	0	1.95689	9.35574	2.8736	5.99489	3.99464	0.71313	7.0986e-05	0.00052826	Upp1	chr11	+	9118103	9136170	1277	protein_coding	uridine_phosphorylase_1	12	8	22	10	11	14	13	1	0	2	8	3	5	4	0.467447	0.255569	0.693931	0.369629	0.490008	0.488968	0.389363	0.0321371	0	0.0679024
ENSMUSG00000032041	479.873	465.578	332.031	446.257	357.786	454.211	480.159	241.587	291.004	245.589	247.927	245.214	272.168	249.665	0.71194	6.5962e-18	2.4651e-16	Tirap	chr9	-	35184551	35200291	4589	protein_coding	toll-interleukin_1_receptor_(TIR)_domain-containing_adaptor_protein	459	539	390	443	296	476	603	263	264	251	212	256	227	250	4.9755	4.79159	3.42319	4.55661	3.66923	4.62628	5.02575	2.35199	2.76293	2.37138
ENSMUSG00000015947	33.4552	27.641	45.1221	19.1397	26.5922	43.8944	20.7034	19.2902	3.30687	15.6551	21.0504	12.4523	13.1888	11.9839	0.70992	5.9404e-05	0.00044976	Fcgr1	chr3	-	96282909	96293969	2589	protein_coding	Fc_receptor_IgG_high_affinity_I	32	32	53	19	22	46	26	21	3	16	18	13	11	12	0.614837	0.504228	0.824572	0.3464	0.483384	0.792445	0.384099	0.332877	0.0556511	0.267938
ENSMUSG00000019789	536.329	559.73	473.357	460.36	485.912	466.616	492.9	287.516	331.789	307.231	292.367	319.927	262.576	288.613	0.70957	7.3599e-29	5.1316e-27	Hey2	chr10	-	30832359	30842801	2550	protein_coding	hairy/enhancer-of-split_related_with_YRPW_motif_2	513	648	556	457	402	489	619	313	301	314	250	334	219	289	10.0073	10.3668	8.78252	8.45927	8.96783	8.55287	9.28437	5.03734	5.66906	5.3387
ENSMUSG00000026308	25.0914	44.0528	29.7976	35.2573	37.4708	30.5352	47.777	11.023	22.0458	24.4611	19.8809	18.1994	8.39284	20.9719	0.70867	1.7763e-05	0.00015211	Klhl30	chr1	+	91351016	91362416	3089	protein_coding	kelch-like_30	24	51	35	35	31	32	60	12	20	25	17	19	7	21	0.386487	0.673536	0.456388	0.534819	0.57088	0.462036	0.742909	0.159426	0.310954	0.350887
ENSMUSG00000030671	263.46	322.19	410.356	406.97	394.048	403.637	245.255	165.345	164.241	248.524	214.012	200.194	249.387	160.784	0.70822	1.5504e-09	2.589e-08	Pde3b	chr7	+	114415281	114539251	6573	protein_coding	phosphodiesterase_3B_cGMP-inhibited	252	373	482	404	326	423	308	180	149	254	183	209	208	161	1.90712	2.31502	2.95371	2.90118	2.82134	2.87025	1.79221	1.12384	1.0887	1.67539
ENSMUSG00000062488	277.051	245.314	260.516	162.184	276.8	258.595	251.626	122.171	144.4	146.766	215.182	130.27	118.699	121.837	0.70513	1.1132e-09	1.9095e-08	I830012O16Rik	chr19	+	34607970	34613401	2000	protein_coding	RIKEN_cDNA_I830012O16_gene	265	284	306	161	229	271	316	133	131	150	184	136	99	122	6.5911	5.79292	6.16277	3.79973	6.51339	6.04342	6.04309	2.7291	3.14576	3.25167
ENSMUSG00000049502	178.776	179.666	149.84	127.934	169.223	160.31	148.109	72.5679	100.308	98.8227	100.574	85.25	94.7192	103.861	0.70468	9.9172e-13	2.4129e-11	Dtx3l	chr16	-	35926511	35939151	5309	protein_coding	deltex_3-like_(Drosophila)	171	208	176	127	140	168	186	79	91	101	86	89	79	104	1.60223	1.5983	1.33532	1.12914	1.50009	1.41137	1.33999	0.610677	0.823215	0.824811
ENSMUSG00000026822	148.458	192.623	154.096	160.169	182.519	151.722	134.572	137.787	68.3419	112.521	95.8963	48.8511	71.9387	87.8822	0.70405	2.1906e-07	2.6965e-06	Lcn2	chr2	-	32384633	32387797	1374	protein_coding	lipocalin_2	142	223	181	159	151	159	169	150	62	115	82	51	60	88	5.14095	6.62105	5.30611	5.46219	6.25161	5.16124	4.70438	4.48024	2.16715	3.62875
ENSMUSG00000020080	201.777	198.67	355.869	358.617	316.689	306.306	237.293	121.253	89.2854	179.055	161.386	189.657	146.275	170.771	0.70209	3.115e-06	3.0945e-05	Hkdc1	chr10	-	62383137	62422491	3517	protein_coding	hexokinase_domain_containing_1	193	230	418	356	262	321	298	132	81	183	138	198	122	171	2.72977	2.66787	4.78728	4.77787	4.2377	4.07076	3.24075	1.54028	1.10611	2.25592
ENSMUSG00000027952	1019.34	941.521	1016.53	1030.52	1072.15	1134.57	1040.74	660.46	516.973	648.707	622.157	682	661.836	612.179	0.70117	3.0128e-36	2.9475e-34	Pmvk	chr3	+	89459118	89469013	1194	protein_coding	phosphomevalonate_kinase	975	1090	1194	1023	887	1189	1307	719	469	663	532	712	552	613	40.6202	37.2418	40.2795	40.4416	42.2591	44.4141	41.8671	24.7128	18.8648	24.0744
ENSMUSG00000040564	13.5912	23.3221	16.1759	27.1985	31.4271	41.9859	17.5182	10.1044	7.71602	11.7413	11.6947	13.4101	14.3877	5.99197	0.70087	8.5568e-05	0.00062336	Apoc1	chr7	-	19689484	19692658	487	protein_coding	apolipoprotein_C-I	13	27	19	27	26	44	22	11	7	12	10	14	12	6	1.32787	2.26175	1.57148	2.61693	3.03701	4.02965	1.72781	0.926959	0.690325	1.06831
ENSMUSG00000041936	4341.86	3944.89	4000.55	3752.38	3571.81	3839.8	4229.86	2276.24	2408.5	2508.73	2389.22	2670.53	2382.37	2263.96	0.70035	4.8785e-51	8.0672e-49	Agrn	chr4	-	156165290	156197488	8612	protein_coding	agrin	4153	4567	4699	3725	2955	4024	5312	2478	2185	2564	2043	2788	1987	2267	23.9883	21.634	21.9779	20.4164	19.5189	20.84	23.5915	11.8085	12.1852	12.908
ENSMUSG00000034792	10.4548	12.9567	21.284	9.06616	13.2961	6.67958	17.5182	5.51149	2.20458	7.82754	5.84734	2.8736	3.59693	3.99464	0.69991	0.00011752	0.00081693	Gna15	chr10	-	81502306	81524225	1962	protein_coding	guanine_nucleotide_binding_protein_alpha_15	10	15	25	9	11	7	22	6	2	8	5	3	3	4	0.253538	0.31189	0.513246	0.216521	0.31893	0.159126	0.42887	0.125502	0.0489571	0.176781
ENSMUSG00000027009	3514.89	3576.05	2651.99	3278.93	2575.82	2734.81	3349.97	1872.99	2269.61	1492.12	1696.9	1806.53	1672.57	1998.32	0.69985	8.7185e-13	2.1296e-11	Itga4	chr2	+	79255426	79333123	9767	protein_coding	integrin_alpha_4	3362	4140	3115	3255	2131	2866	4207	2039	2059	1525	1451	1886	1395	2001	17.1229	17.2921	12.8464	15.7306	12.4115	13.0875	16.4745	8.56748	10.1246	6.76947
ENSMUSG00000067586	961.838	1039.99	1025.89	874.381	937.979	1062.05	1280.42	536.451	514.769	558.691	555.497	480.848	804.514	732.019	0.69933	3.6253e-10	6.6415e-09	S1pr3	chr13	+	51408618	51422797	4484	protein_coding	sphingosine-1-phosphate_receptor_3	920	1204	1205	868	776	1113	1608	584	467	571	475	502	671	733	10.2062	10.9539	10.8245	9.13715	9.84459	11.0706	13.7158	5.34496	5.00191	5.52098
ENSMUSG00000020143	44.9555	45.7804	43.4194	43.3161	22.966	31.4894	39.0179	22.0459	12.1252	22.5042	23.3893	8.62079	25.1785	24.9665	0.69771	2.0935e-05	0.00017566	Dock2	chr11	-	34226815	34783892	6409	protein_coding	dedicator_of_cyto-kinesis_2	43	53	51	43	19	33	49	24	11	23	20	9	21	25	0.333749	0.337361	0.320527	0.31669	0.168642	0.22965	0.292421	0.15368	0.0824303	0.155591
ENSMUSG00000061039	6.27286	7.77402	6.81089	12.0882	2.41747	9.54225	18.3145	2.75574	3.30687	2.93533	1.16947	1.91573	0	0.998661	0.6973	5.2772e-05	0.00040523	Olfr920	chr9	+	38752796	38756863	1960	protein_coding	olfactory_receptor_920	6	9	8	12	2	10	23	3	3	3	1	2	0	1	0.152278	0.187325	0.164406	0.288989	0.0580464	0.227555	0.448822	0.0628148	0.0735105	0.0663607
ENSMUSG00000022901	20.9095	22.4583	12.7704	14.1029	8.46115	7.6338	7.96284	3.67432	5.51144	4.89221	3.5084	1.91573	5.99489	6.99063	0.69444	0.00013038	0.00089459	Cd86	chr16	-	36603869	36666081	2539	protein_coding	CD86_antigen	20	26	15	14	7	8	10	4	5	5	3	2	5	7	0.39184	0.417753	0.237965	0.260269	0.156833	0.140531	0.15064	0.0646538	0.0945784	0.0853794
ENSMUSG00000015340	23.0005	27.641	28.0949	13.0956	27.8009	14.3134	18.3145	10.1044	7.71602	11.7413	8.18627	1.91573	9.59182	15.9786	0.69139	0.00012184	0.00084263	Cybb	chrX	-	9435252	9487771	4752	protein_coding	cytochrome_b-245_beta_polypeptide	22	32	33	13	23	15	23	11	7	12	7	2	8	16	0.230297	0.274715	0.279719	0.129129	0.27533	0.140786	0.18512	0.0949977	0.0707467	0.109484
ENSMUSG00000033581	359.644	344.648	317.558	389.845	420.64	325.391	370.272	239.75	264.549	206.451	228.046	201.152	213.418	169.772	0.68874	1.9865e-16	6.5814e-15	Igf2bp2	chr16	-	22059009	22163299	4952	protein_coding	insulin-like_growth_factor_2_mRNA_binding_protein_2	344	399	373	387	348	341	465	261	240	211	195	210	178	170	3.45557	3.28701	3.03398	3.68882	3.99761	3.07126	3.59149	2.163	2.32764	1.84734
ENSMUSG00000030847	190.277	199.533	288.611	209.529	296.14	243.327	187.127	124.927	106.922	158.508	164.895	116.86	136.683	137.815	0.68822	6.9867e-10	1.2434e-08	Bag3	chr7	+	128523583	128546977	2591	protein_coding	BCL2-associated_athanogene_3	182	231	339	208	245	255	235	136	97	162	141	122	114	138	3.49418	3.63708	5.27008	3.78924	5.37898	4.38951	3.46899	2.15411	1.798	2.71077
ENSMUSG00000029919	58.5466	31.0961	44.2708	40.2941	32.6359	37.2148	49.3696	27.5574	19.8412	17.612	24.5588	17.2416	17.9847	30.9585	0.68731	1.1115e-05	9.9326e-05	Hpgds	chr6	-	65117293	65144908	3476	protein_coding	hematopoietic_prostaglandin_D_synthase	56	36	52	40	27	39	62	30	18	18	21	18	15	31	0.801401	0.422505	0.602571	0.543171	0.441861	0.500413	0.682204	0.354192	0.248701	0.224511
ENSMUSG00000001020	19.864	37.1426	36.6085	34.2499	41.097	34.3521	25.4811	14.6973	15.432	9.78443	15.2031	17.2416	148.673	19.9732	0.68708	2.977e-05	0.00024155	S100a4	chr3	+	90603770	90606045	498	protein_coding	S100_calcium_binding_protein_A4	19	43	43	34	34	36	32	16	14	10	13	18	124	20	1.89787	3.52248	3.47795	3.2226	3.88375	3.22416	2.45767	1.31852	1.35015	0.870595
ENSMUSG00000068245	31.3643	33.6874	29.7976	41.3014	45.932	24.8099	27.8699	23.8831	20.9435	13.6982	16.3725	8.62079	15.5867	19.9732	0.68677	3.0007e-05	0.00024326	Phf11d	chr14	-	59347407	59365470	2973	protein_coding	PHD_finger_protein_11D	30	39	35	41	38	26	35	26	19	14	14	9	13	20	0.501959	0.535154	0.474196	0.650947	0.727093	0.390051	0.450272	0.358902	0.306933	0.204164
ENSMUSG00000030077	525.874	561.457	402.694	378.764	380.752	348.292	532.714	256.284	282.186	272.007	267.808	270.118	223.01	297.601	0.68649	2.4036e-12	5.6423e-11	Chl1	chr6	+	103510876	103733035	7751	protein_coding	cell_adhesion_molecule_with_homology_to_L1CAM	503	650	473	376	315	365	669	279	256	278	229	282	186	298	3.22814	3.42109	2.45803	2.28974	2.31182	2.10029	3.30119	1.47721	1.58623	1.55501
ENSMUSG00000022780	21.955	7.77402	22.9867	20.147	12.0874	7.6338	17.5182	3.67432	6.61373	7.82754	8.18627	3.83146	3.59693	7.98929	0.68549	0.00016511	0.0011031	Mfi2	chr16	+	31878810	31899020	4133	protein_coding	antigen_p97_(melanoma_associated)_identified_by_monoclonal_antibodies_133.2_and_96.5	21	9	27	20	10	8	22	4	6	8	7	4	3	8	0.252753	0.0888354	0.263138	0.228413	0.137637	0.0863312	0.203591	0.0397184	0.0697221	0.0839209
ENSMUSG00000038451	173.549	162.391	182.191	194.419	180.102	174.623	220.571	119.416	112.433	124.262	121.625	72.7978	117.5	102.862	0.68352	8.8936e-12	1.9505e-10	Spsb2	chr6	+	124808661	124810619	1322	protein_coding	splA/ryanodine_receptor_domain_and_SOCS_box_containing_2	166	188	214	193	149	183	277	130	102	127	104	76	98	103	6.24624	5.80143	6.52029	6.891	6.41145	6.17395	8.01402	4.03561	3.70555	4.16503
ENSMUSG00000024935	849.972	925.109	979.065	955.976	858.202	930.37	891.838	536.451	578.701	590.001	585.903	611.118	528.749	516.308	0.68256	6.5653e-42	8.071e-40	Slc1a1	chr19	+	28835049	28913960	3800	protein_coding	solute_carrier_family_1_(neuronal/epithelial_high_affinity_glutamate_transporter_system_Xag)_member_1	813	1071	1150	949	710	975	1120	584	525	603	501	638	441	517	10.6426	11.4978	12.1899	11.788	10.6286	11.4436	11.2729	6.30705	6.63529	6.87986
ENSMUSG00000024778	33.4552	38.8701	22.1354	52.3823	27.8009	38.169	21.4997	17.453	11.0229	19.5689	21.0504	11.4944	23.9796	10.9853	0.67991	7.2968e-05	0.00054085	Fas	chr19	+	34290659	34327770	1486	protein_coding	Fas_(TNF_receptor_superfamily_member_6)	32	45	26	52	23	40	27	19	10	20	18	12	20	11	1.07121	1.23539	0.704756	1.65174	0.880462	1.20056	0.69494	0.524725	0.323196	0.583522
ENSMUSG00000041479	610.558	527.77	517.628	497.632	541.514	523.87	630.657	336.201	338.403	314.08	299.384	323.759	308.137	429.424	0.67928	2.0757e-19	8.4873e-18	Syt15	chr14	+	34219595	34230421	3624	protein_coding	synaptotagmin_XV	584	611	608	494	448	549	792	366	307	321	256	338	257	430	8.01616	6.878	6.75772	6.43421	7.0322	6.75659	8.35871	4.14467	4.0685	3.84028
ENSMUSG00000023186	524.829	510.494	511.668	454.315	475.033	500.014	461.845	247.098	261.242	295.49	312.248	250.003	437.627	277.628	0.67873	1.4995e-13	3.9913e-12	Vwa5a	chr9	+	38718268	38743337	4157	protein_coding	von_Willebrand_factor_A_domain_containing_5A	502	591	601	451	393	524	580	269	237	302	267	261	365	278	6.00711	5.79984	5.82343	5.12098	5.37791	5.62205	5.33642	2.65564	2.73812	3.14973
ENSMUSG00000040428	198.64	193.487	189.002	178.301	157.136	200.387	220.571	155.24	137.786	101.758	83.0322	105.365	98.3162	112.849	0.67848	2.1268e-10	3.99e-09	Plekha4	chr7	+	45526330	45554229	2660	protein_coding	pleckstrin_homology_domain_containing_family_A_(phosphoinositide_binding_specific)_member_4	190	224	222	177	130	210	277	169	125	104	71	110	82	113	3.55315	3.43538	3.36168	3.14086	2.78012	3.52112	3.98291	2.60737	2.2569	1.69511
ENSMUSG00000021998	94.0928	74.2851	75.7711	83.6102	80.9853	75.3838	98.7392	47.7662	55.1144	37.1808	67.8291	26.8202	43.1632	56.9237	0.67598	4.8397e-07	5.5893e-06	Lcp1	chr14	+	75131101	75230842	3841	protein_coding	lymphocyte_cytosolic_protein_1	90	86	89	83	67	79	124	52	50	38	58	28	36	57	1.16557	0.913404	0.933319	1.01998	0.992275	0.917331	1.23475	0.555592	0.625187	0.428929
ENSMUSG00000041827	13.5912	6.91024	12.7704	13.0956	19.3398	13.3592	9.55541	3.67432	5.51144	8.80598	1.16947	2.8736	4.79591	4.99331	0.67449	0.00020771	0.0013486	Oasl1	chr5	+	114923240	114937915	2181	protein_coding	2'-5'_oligoadenylate_synthetase-like_1	13	8	15	13	16	14	12	4	5	9	1	3	4	5	0.296503	0.149638	0.277026	0.281348	0.417317	0.286296	0.21044	0.0752664	0.110103	0.178909
ENSMUSG00000028804	876.109	855.143	967.146	1041.6	884.794	1012.43	925.282	494.197	586.417	531.294	595.259	712.652	579.106	543.272	0.67441	3.388e-23	1.711e-21	Csmd2	chr4	+	127987857	128567656	12964	protein_coding	CUB_and_Sushi_multiple_domains_2	838	990	1136	1034	732	1061	1162	538	532	543	509	744	483	544	3.21549	3.11534	3.52959	3.76477	3.21198	3.65023	3.42822	1.7031	1.97087	1.81596
ENSMUSG00000023249	199.686	178.803	142.177	164.198	164.388	149.813	171.997	90.9395	74.9556	115.456	111.099	68.0084	122.296	114.846	0.67118	1.8676e-09	3.0965e-08	Parp3	chr9	-	106470322	106476949	2962	protein_coding	poly_(ADP-ribose)_polymerase_family_member_3	191	207	167	163	136	157	216	99	68	118	95	71	102	115	3.20767	2.85098	2.27099	2.59752	2.61189	2.36406	2.78914	1.37166	1.10258	1.7272
ENSMUSG00000024737	12.5457	24.1859	16.1759	23.1691	22.966	19.0845	29.4625	15.6159	6.61373	5.87066	16.3725	6.70506	7.19387	8.98795	0.67085	0.00017148	0.0011411	Slc15a3	chr19	+	10839727	10859362	4868	protein_coding	solute_carrier_family_15_member_3	12	28	19	23	19	20	37	17	6	6	14	7	6	9	0.122623	0.234648	0.157213	0.223015	0.222026	0.183241	0.290705	0.143316	0.059195	0.0534375
ENSMUSG00000047735	149.503	161.527	142.177	129.948	152.301	142.18	126.609	97.3696	73.8533	80.2323	133.319	57.4719	79.1325	69.9063	0.67078	2.8735e-08	4.013e-07	Samd9l	chr6	-	3372257	3399571	5329	protein_coding	sterile_alpha_motif_domain_containing_9-like	143	187	167	129	126	149	159	106	67	82	114	60	66	70	1.33485	1.43154	1.26228	1.14262	1.34501	1.24705	1.14118	0.816314	0.603828	0.667135
ENSMUSG00000101429	389.963	436.209	477.614	500.654	423.057	401.729	397.346	286.597	263.447	261.244	259.622	288.317	235	269.638	0.67037	3.8204e-22	1.8258e-20	RP24-95P4.2	chr1	-	57200645	57214993	3301	lincRNA	cDNA_sequence_BC055402	373	505	561	497	350	421	499	312	239	267	222	301	196	270	5.62089	6.24101	6.84545	7.10669	6.03148	5.68827	5.78172	3.87888	3.47726	3.5068
ENSMUSG00000097415	17.7731	24.1859	13.6218	13.0956	24.1747	27.6725	28.6662	6.43007	12.1252	5.87066	4.67787	4.78933	7.19387	20.9719	0.6702	0.00022083	0.0014174	AU020206	chr7	-	75769762	75782099	656	lincRNA	expressed_sequence_AU020206	17	28	16	13	20	29	36	7	11	6	4	5	6	21	1.2891	1.74126	0.982428	0.935397	1.73431	1.97168	2.09894	0.437916	0.805329	0.396546
ENSMUSG00000022722	4898.05	5190.46	4861.27	4439.4	4619.79	4961.97	4549.97	3174.62	2983.89	3201.46	2775.15	2905.21	2984.26	2910.1	0.67013	1.277e-59	2.7427e-57	Arl6	chr16	-	59612949	59639391	1696	protein_coding	ADP-ribosylation_factor-like_6	4685	6009	5710	4407	3822	5200	5714	3456	2707	3272	2373	3033	2489	2914	137.412	144.539	135.611	122.652	128.194	136.748	128.859	83.6267	76.6561	83.6437
ENSMUSG00000034810	488.237	500.993	477.614	480.507	419.431	443.715	523.955	304.05	322.971	271.029	271.316	308.433	290.153	304.592	0.6677	6.2889e-27	4.0522e-25	Scn7a	chr2	-	66673425	66784914	7338	protein_coding	sodium_channel_voltage-gated_type_VII_alpha	467	580	561	477	347	465	658	331	293	277	232	322	242	305	3.16578	3.22448	3.07943	3.0683	2.69001	2.8263	3.42965	1.85117	1.91767	1.63662
ENSMUSG00000049493	230.005	210.762	271.584	267.955	246.582	243.327	208.626	129.52	123.456	169.271	155.539	149.427	155.867	142.809	0.66737	9.381e-15	2.7605e-13	Pls1	chr9	-	95752642	95845311	3704	protein_coding	plastin_1_(I-isoform)	220	244	319	266	204	255	262	141	112	173	133	156	130	143	2.95456	2.68737	3.469	3.38975	3.133	3.07052	2.70541	1.56223	1.45222	2.02498
ENSMUSG00000037465	434.918	352.422	327.774	378.764	375.917	318.711	385.401	211.274	228.174	178.077	244.419	220.309	225.408	270.637	0.66708	8.0869e-16	2.5612e-14	Klf10	chr15	-	38294413	38300707	3045	protein_coding	Kruppel-like_factor_10	416	408	385	376	311	334	484	230	207	182	209	230	188	271	6.79591	5.46615	5.09282	5.82851	5.80998	4.89218	6.07939	3.09983	3.26488	2.59137
ENSMUSG00000075012	118.139	112.291	127.704	121.89	139.005	98.2852	125.813	70.7307	56.2167	87.0814	66.6596	74.7135	62.3468	84.8862	0.66662	4.6189e-10	8.3632e-09	Fjx1	chr2	-	102449366	102452499	3134	protein_coding	four_jointed_box_1_(Drosophila)	113	130	150	121	115	103	158	77	51	89	57	78	52	85	1.79358	1.69221	1.92787	1.8224	2.08737	1.46582	1.92824	1.0083	0.781548	1.23122
ENSMUSG00000086163	8.36381	8.6378	7.66225	4.02941	6.04368	17.1761	11.148	3.67432	3.30687	0	1.16947	2.8736	3.59693	1.99732	0.66511	0.00015342	0.0010323	Gm14206	chr11	-	100278706	100291286	747	antisense	predicted_gene_14206	8	10	9	4	5	18	14	4	3	0	1	3	3	2	0.532735	0.54612	0.485296	0.252753	0.38076	1.07472	0.716819	0.219754	0.192879	0
ENSMUSG00000017830	51.2283	69.9662	78.3252	56.4117	56.8106	49.6197	39.0179	22.9645	17.6366	38.1593	31.5756	44.0618	34.7704	30.9585	0.66483	1.4512e-05	0.00012578	Dhx58	chr11	-	100694884	100704271	2412	protein_coding	DEXH_(Asp-Glu-X-His)_box_polypeptide_58	49	81	92	56	47	52	49	25	16	39	27	46	29	31	1.01056	1.36999	1.53637	1.09589	1.10846	0.961544	0.777	0.425363	0.318586	0.701024
ENSMUSG00000093661	246.732	285.911	252.854	181.323	186.145	228.06	168.812	122.171	119.047	142.853	146.183	127.396	136.683	140.811	0.66411	2.869e-10	5.3266e-09	Eif4e3	chr6	-	99625135	99666771	2515	protein_coding	eukaryotic_translation_initiation_factor_4E_member_3	236	331	297	180	154	239	212	133	108	146	125	133	114	141	4.66784	5.36907	4.75667	3.37825	3.48325	4.23841	3.22404	2.17025	2.06239	2.51687
ENSMUSG00000026072	292.733	265.181	218.8	201.47	226.034	257.641	238.885	139.624	138.888	136.004	153.2	142.722	169.056	164.779	0.66343	2.5508e-14	7.2108e-13	Il1r1	chr1	+	40225080	40316198	4829	protein_coding	interleukin_1_receptor_type_I	280	307	257	200	187	270	300	152	126	139	131	149	141	165	2.88431	2.59352	2.14368	1.95492	2.20285	2.49373	2.37611	1.29176	1.25313	1.24797
ENSMUSG00000086744	25.0914	30.2323	32.3517	20.147	29.0097	34.3521	34.2402	14.6973	14.3297	6.8491	12.8641	17.2416	22.7806	18.9746	0.66152	6.9385e-05	0.00051726	Gm15997	chr5	-	149489056	149538030	1491	processed_transcript	predicted_gene_15997	24	35	38	20	24	36	43	16	13	7	11	18	19	19	0.80071	0.957633	1.02657	0.633153	0.915662	1.07688	1.10304	0.440392	0.418746	0.203548
ENSMUSG00000028619	399.372	381.791	441.005	420.065	447.232	440.852	384.605	267.307	223.765	257.33	258.452	263.413	293.75	248.667	0.66148	2.0606e-24	1.1426e-22	Tceanc2	chr4	-	107134155	107179116	6431	protein_coding	transcription_elongation_factor_A_(SII)_N-terminal_and_central_domain_containing_2	382	442	518	417	370	462	483	291	203	263	221	275	245	249	2.95479	2.80384	3.24441	3.06065	3.27284	3.20411	2.87257	1.857	1.51601	1.77306
ENSMUSG00000002897	144.276	120.065	125.15	148.081	147.466	142.18	150.498	78.998	88.1831	69.4694	93.5574	84.2922	79.1325	100.865	0.66078	1.3509e-11	2.9183e-10	Il17ra	chr6	+	120463197	120483727	3970	protein_coding	interleukin_17_receptor_A	138	139	147	147	122	149	189	86	80	71	80	88	66	101	1.72914	1.42835	1.49146	1.74777	1.74812	1.67394	1.82085	0.889007	0.967796	0.775378
ENSMUSG00000027947	25.0914	31.9599	26.3922	25.1838	20.5485	30.5352	27.0737	18.3716	13.2275	7.82754	8.18627	20.1152	11.9898	15.9786	0.65973	8.473e-05	0.00061822	Il6ra	chr3	-	89869324	89913162	3343	protein_coding	interleukin_6_receptor_alpha	24	37	31	25	17	32	34	20	12	8	7	21	10	16	0.357122	0.451517	0.373517	0.352988	0.289277	0.42693	0.388996	0.245522	0.172397	0.103753
ENSMUSG00000006519	88.8655	90.6969	98.7579	89.6543	94.2814	92.5598	102.721	52.3591	42.9892	65.5556	72.507	40.2303	71.9387	47.9357	0.65952	3.2558e-08	4.5098e-07	Cyba	chr8	-	122424772	122432940	758	protein_coding	cytochrome_b-245_alpha_polypeptide	85	105	116	89	78	97	129	57	39	67	62	42	60	48	5.57817	5.65105	6.16415	5.54214	5.85365	5.7075	6.50912	3.08605	2.47104	3.83223
ENSMUSG00000026786	44.9555	20.7307	17.8786	36.2646	35.0533	24.8099	39.8142	9.18581	11.0229	11.7413	18.7115	17.2416	23.9796	16.9772	0.65873	0.00014516	0.0009856	Apbb1ip	chr2	+	22774094	22875653	4061	protein_coding	amyloid_beta_(A4)_precursor_protein-binding_family_B_member_1_interacting_protein	43	24	21	36	29	26	50	10	10	12	16	18	20	17	0.526717	0.241094	0.208291	0.418433	0.406225	0.285551	0.470911	0.101056	0.118264	0.128113
ENSMUSG00000060586	27.1824	35.415	27.2436	15.1103	39.8883	23.8556	11.148	13.7787	3.30687	11.7413	16.3725	5.74719	14.3877	12.9826	0.65861	0.000268	0.001681	H2-Eb1	chr17	+	34305877	34316199	1184	protein_coding	histocompatibility_2_class_II_antigen_E_beta	26	41	32	15	33	25	14	15	3	12	14	6	12	13	1.09235	1.41267	1.08864	0.597993	1.58549	0.941741	0.45225	0.51992	0.12169	0.439415
ENSMUSG00000070509	472.555	478.534	487.83	494.609	546.349	486.655	525.547	297.62	278.879	360.067	343.823	286.402	317.729	296.602	0.65846	8.1459e-26	4.8944e-24	Rgma	chr7	+	73375520	73419899	3586	protein_coding	repulsive_guidance_molecule_family_member_A	452	554	573	491	452	510	660	324	253	368	294	299	265	297	6.27003	6.30243	6.43619	6.46291	7.17017	6.34312	7.0394	3.70793	3.3884	4.44921
ENSMUSG00000052942	73.1833	55.2819	69.8116	60.4411	62.8543	60.1162	64.499	30.3132	28.6595	53.8143	33.9145	30.6517	29.9744	48.9344	0.65797	1.4792e-06	1.558e-05	Glis3	chr19	-	28258851	28680077	7514	protein_coding	GLIS_family_zinc_finger_3	70	64	82	60	52	63	81	33	26	55	29	32	25	49	0.463413	0.34747	0.439569	0.376909	0.393671	0.373949	0.412302	0.180235	0.166183	0.317349
ENSMUSG00000036560	126.503	107.973	105.569	119.875	118.456	105.919	134.572	57.8706	60.6259	78.2754	60.8123	68.9663	69.5407	95.8715	0.65717	2.5494e-09	4.1352e-08	Lgi4	chr7	+	31059342	31070935	4037	protein_coding	leucine-rich_repeat_LGI_family_member_4	121	125	124	119	98	111	169	63	55	80	52	72	58	96	1.49097	1.26317	1.23722	1.39138	1.38092	1.22633	1.60114	0.640441	0.654317	0.859166
ENSMUSG00000021665	662.832	629.696	598.507	589.301	572.941	573.489	566.158	361.921	353.835	403.118	454.923	322.801	334.515	388.479	0.65599	6.6273e-23	3.2848e-21	Hexb	chr13	-	97176332	97198357	1904	protein_coding	hexosaminidase_B	634	729	703	585	474	601	711	394	321	412	389	337	279	389	16.564	15.6196	14.8721	14.5026	14.1616	14.0783	14.2825	8.49232	8.09697	9.38158
ENSMUSG00000021464	64.8195	74.2851	59.5953	37.272	62.8543	69.6584	60.5176	44.0919	24.2503	26.4179	43.2703	40.2303	26.3775	37.9491	0.65584	6.0546e-06	5.6995e-05	Ror2	chr13	-	53109312	53286124	3985	protein_coding	receptor_tyrosine_kinase-like_orphan_receptor_2	62	86	70	37	52	73	76	48	22	27	37	42	22	38	0.773936	0.880398	0.707545	0.438258	0.742295	0.81703	0.729436	0.494322	0.265142	0.293752
ENSMUSG00000054720	438.054	531.225	626.602	601.389	675.683	586.848	574.121	302.213	277.777	355.175	406.975	424.334	384.872	328.559	0.65538	5.1504e-13	1.297e-11	Lrrc8c	chr5	+	105519388	105613018	6976	protein_coding	leucine_rich_repeat_containing_8_family_member_C	419	615	736	597	559	615	721	329	252	363	348	443	321	329	2.98778	3.59648	4.24968	4.03947	4.55834	3.93199	3.95304	1.93547	1.73492	2.25604
ENSMUSG00000024998	923.155	916.471	964.592	954.969	859.411	824.451	876.709	502.464	547.837	585.109	651.393	567.056	555.127	572.233	0.65373	1.0255e-33	9.3025e-32	Plce1	chr19	+	38481109	38785030	9439	protein_coding	phospholipase_C_epsilon_1	883	1061	1133	948	711	864	1101	547	497	598	557	592	463	573	4.65347	4.58562	4.83491	4.74066	4.28494	4.08255	4.46132	2.37825	2.5288	2.74676
ENSMUSG00000003283	23.0005	18.1394	23.8381	8.05881	19.3398	15.2676	19.9071	6.43007	9.9206	12.7198	10.5252	3.83146	4.79591	8.98795	0.65335	0.00028758	0.00179	Hck	chr2	+	153108468	153151441	2092	protein_coding	hemopoietic_cell_kinase	22	21	28	8	16	16	25	7	9	13	9	4	4	9	0.523122	0.409512	0.539114	0.180503	0.435071	0.341116	0.457068	0.13732	0.206617	0.269418
ENSMUSG00000048779	20.9095	12.9567	17.8786	25.1838	19.3398	16.2218	13.5368	9.18581	1.10229	11.7413	12.8641	2.8736	8.39284	7.98929	0.65208	0.00031917	0.0019599	P2ry6	chr7	-	100937638	100964391	1938	protein_coding	pyrimidinergic_receptor_P2Y_G-protein_coupled_6	20	15	21	25	16	17	17	10	1	12	11	3	7	8	0.513355	0.315752	0.436466	0.608896	0.469643	0.391236	0.335504	0.21176	0.0247817	0.268456
ENSMUSG00000073490	12.5457	10.3654	3.40544	6.04411	14.5048	6.67958	12.7405	2.75574	1.10229	3.91377	5.84734	0	1.19898	1.99732	0.65201	0.00018324	0.001209	AI607873	chr1	-	173723430	173741809	3481	protein_coding	expressed_sequence_AI607873	12	12	4	6	12	7	16	3	1	4	5	0	1	2	0.171482	0.140633	0.046285	0.0813587	0.1961	0.0896886	0.1758	0.0353683	0.0137969	0.0498198
ENSMUSG00000030798	32.4098	45.7804	39.1626	45.3308	61.6455	55.3451	50.1659	31.2318	24.2503	30.3317	28.0672	22.9888	27.5765	21.9705	0.6517	8.0721e-06	7.4193e-05	Cd37	chr7	-	45233632	45239115	2541	protein_coding	CD37_antigen	31	53	46	45	51	58	63	34	22	31	24	24	23	22	0.606874	0.850903	0.729185	0.83592	1.14174	1.01804	0.948283	0.549125	0.415817	0.528936
ENSMUSG00000035860	19.864	16.4118	36.6085	35.2573	22.966	25.7641	27.8699	11.023	16.5343	9.78443	15.2031	13.4101	11.9898	16.9772	0.65013	0.00013782	0.00094059	Cdhr3	chr12	-	33033796	33092875	2953	protein_coding	cadherin-related_family_member_3	19	19	43	35	19	27	35	12	15	10	13	14	10	17	0.32006	0.262482	0.586529	0.55945	0.366009	0.407797	0.453322	0.166769	0.243956	0.146819
ENSMUSG00000005202	3.13643	10.3654	5.95953	4.02941	8.46115	8.58803	4.7777	3.67432	0	0	0	0	0	0.998661	0.65008	4.4335e-05	0.00034576	Shbg	chr11	-	69614804	69617905	1419	protein_coding	sex_hormone_binding_globulin	3	12	7	4	7	9	6	4	0	0	0	0	0	1	0.105167	0.344991	0.198701	0.133056	0.280619	0.282881	0.161723	0.115684	0	0
ENSMUSG00000019997	509.147	591.69	521.884	518.786	708.319	541.046	807.432	403.257	321.868	301.36	421.008	300.77	458.01	359.518	0.6487	3.9919e-10	7.2844e-09	Ctgf	chr10	+	24595442	24598683	2490	protein_coding	connective_tissue_growth_factor	487	685	613	515	586	567	1014	439	292	308	360	314	382	360	9.72907	11.2228	9.91621	9.76258	13.3875	10.1561	15.5755	7.23539	5.63207	5.36287
ENSMUSG00000030351	24.0459	32.8237	25.5408	14.1029	31.4271	25.7641	23.0922	7.34865	7.71602	13.6982	4.67787	10.5365	16.7857	22.9692	0.6485	0.00026099	0.0016398	Tspan11	chr6	+	127887589	127953031	4242	protein_coding	tetraspanin_11	23	38	30	14	26	27	29	8	7	14	4	11	14	23	0.269711	0.365445	0.284862	0.155781	0.348662	0.283881	0.261475	0.0773956	0.0792523	0.143088
ENSMUSG00000040552	34.5007	24.1859	29.7976	32.2352	42.3057	23.8556	22.296	13.7787	13.2275	18.5904	19.8809	7.66292	10.7908	22.9692	0.64834	0.00012897	0.00088602	C3ar1	chr6	-	122847138	122856161	4305	protein_coding	complement_component_3a_receptor_1	33	28	35	32	35	25	28	15	12	19	17	8	9	23	0.381314	0.265335	0.327476	0.35086	0.462484	0.259006	0.248764	0.142993	0.133873	0.191349
ENSMUSG00000034463	785.152	740.26	825.82	865.315	930.726	823.496	633.842	433.57	410.051	518.575	570.7	581.424	428.035	533.285	0.64816	1.4136e-14	4.0827e-13	Scara3	chr14	-	65919395	65953744	3405	protein_coding	scavenger_receptor_class_A_member_3	751	857	970	859	770	863	796	472	372	530	488	607	357	534	10.9715	10.2677	11.4746	11.9078	12.864	11.3041	8.94125	5.68882	5.24699	6.74846
ENSMUSG00000035021	27.1824	30.2323	21.284	28.2058	20.5485	27.6725	31.0551	10.1044	14.3297	15.6551	11.6947	17.2416	21.5816	7.98929	0.6468	0.00011143	0.00078336	Baz1a	chr12	-	54892989	55014348	6188	protein_coding	bromodomain_adjacent_to_zinc_finger_domain_1A	26	35	25	28	17	29	39	11	13	16	10	18	18	8	0.209009	0.230742	0.162732	0.213582	0.156279	0.209022	0.241055	0.0729524	0.100897	0.112103
ENSMUSG00000035697	50.1828	51.8268	69.8116	60.4411	53.1844	55.3451	52.5547	32.1503	27.5572	31.3102	26.8977	37.3568	28.7755	44.9397	0.64496	1.9595e-06	2.0151e-05	Hmha1	chr10	+	80016653	80031472	3970	protein_coding	histocompatibility_(minor)_HA-1	48	60	82	60	44	58	66	35	25	32	23	39	24	45	0.60144	0.616552	0.83197	0.713374	0.630469	0.6516	0.635851	0.361805	0.302436	0.349466
ENSMUSG00000002985	18569.7	17847.4	20756.2	18275.4	23077.2	20678.1	18621.9	12643.3	7281.72	13465.3	15121.2	8827.69	12672	12819.8	0.64304	8.7826e-08	1.1428e-06	Apoe	chr7	-	19696109	19699166	1386	protein_coding	apolipoprotein_E	17762	20662	24380	18142	19092	21670	23386	13764	6606	13762	12930	9216	10569	12837	637.486	608.16	708.525	617.844	783.591	697.331	645.349	407.548	228.907	430.491
ENSMUSG00000091722	191.322	171.892	160.056	169.235	182.519	190.845	195.886	93.6953	153.218	108.607	111.099	103.449	111.505	100.865	0.64297	1.2186e-11	2.6386e-10	Siah3	chr14	+	75455982	75526141	905	protein_coding	seven_in_absentia_homolog_3_(Drosophila)	183	199	188	168	151	200	246	102	139	111	95	108	93	101	10.0588	8.97043	8.36746	8.76228	9.49139	9.85655	10.3965	4.62539	7.37651	5.31765
ENSMUSG00000026519	72.1378	57.0095	75.7711	79.5808	73.7329	73.4753	82.8135	45.0105	29.7618	39.1377	35.084	44.0618	61.1479	50.9317	0.64278	6.504e-07	7.3302e-06	Tmem63a	chr1	+	180942344	180975112	3306	protein_coding	transmembrane_protein_63a	69	66	89	79	61	77	104	49	27	40	30	46	51	51	1.03822	0.814423	1.08436	1.12793	1.04961	1.0388	1.20319	0.608261	0.392234	0.524569
ENSMUSG00000036111	906.428	913.88	915.213	953.962	1029.84	881.704	775.581	543.8	491.621	614.462	604.615	620.697	588.698	560.249	0.64256	1.1572e-25	6.8866e-24	Lmo1	chr7	-	109138572	109170308	1071	protein_coding	LIM_domain_only_1	867	1058	1075	947	852	924	974	592	446	628	517	648	491	561	40.2691	40.3	40.43	41.7366	45.2534	38.4792	34.7834	22.6845	20	25.4224
ENSMUSG00000030966	118.139	108.836	118.339	81.5955	125.709	109.736	100.332	64.3007	55.1144	65.5556	74.8459	65.1348	82.7295	56.9237	0.64233	8.3398e-09	1.2477e-07	Trim21	chr7	-	102557922	102565469	2775	protein_coding	tripartite_motif-containing_21	113	126	139	81	104	115	126	70	50	67	64	68	69	57	2.02562	1.85232	2.01761	1.37778	2.13192	1.84832	1.73664	1.03522	0.865349	1.04679
ENSMUSG00000032359	612.649	558.002	555.939	473.455	495.582	559.176	496.085	375.7	229.276	347.347	391.772	262.455	329.719	388.479	0.6405	9.4505e-12	2.0702e-10	Ctsh	chr9	+	90054152	90076089	2743	protein_coding	cathepsin_H	586	646	653	470	410	586	623	409	208	355	335	274	275	389	10.6271	9.60761	9.58897	8.08777	8.50275	9.52829	8.68689	6.1192	3.64185	5.6111
ENSMUSG00000010142	24.0459	16.4118	9.36497	11.0809	19.3398	15.2676	9.55541	3.67432	5.51144	7.82754	3.5084	10.5365	5.99489	5.99197	0.64039	0.00042851	0.0025485	Tnfrsf13b	chr11	+	61126755	61149372	2556	protein_coding	tumor_necrosis_factor_receptor_superfamily_member_13b	23	19	11	11	16	16	12	4	5	8	3	11	5	6	0.447619	0.303251	0.173347	0.203137	0.356091	0.279192	0.179565	0.0642238	0.0939493	0.135698
ENSMUSG00000023943	7.31833	6.04646	18.7299	3.02205	6.04368	9.54225	1.59257	0.918581	0	1.95689	1.16947	0	1.19898	0.998661	0.63982	5.772e-05	0.00043879	Sult1c1	chr17	-	53961615	53990674	1556	protein_coding	sulfotransferase_family_cytosolic_1C_member_1	7	7	22	3	5	10	2	1	0	2	1	0	1	1	0.223785	0.183526	0.569505	0.0910056	0.182794	0.286638	0.0491612	0.0263747	0	0.0557271
ENSMUSG00000040264	75.2743	95.8796	57.8926	54.397	80.9853	74.4296	82.0172	59.7078	56.2167	44.0299	28.0672	31.6096	46.7601	33.9545	0.63785	9.4764e-06	8.5876e-05	Gbp5	chr3	+	142496934	142619179	3021	protein_coding	guanylate_binding_protein_5	72	111	68	54	67	78	103	65	51	45	24	33	39	34	1.18556	1.49893	0.906656	0.843723	1.26161	1.15156	1.30403	0.882998	0.810782	0.645814
ENSMUSG00000031538	335.598	322.19	521.884	466.404	482.286	436.081	355.143	202.088	181.878	278.856	278.333	318.969	293.75	227.695	0.63432	2.3522e-08	3.3172e-07	Plat	chr8	+	22757744	22782847	2531	protein_coding	plasminogen_activator_tissue	321	373	613	463	399	457	446	220	165	285	238	333	245	228	6.30891	6.01209	9.75557	8.63466	8.96772	8.05318	6.73977	3.5672	3.13095	4.88201
ENSMUSG00000029810	871.927	784.313	824.118	744.433	906.552	862.62	747.711	495.115	372.573	529.337	612.801	384.104	671.428	512.313	0.63327	2.6014e-11	5.4374e-10	Tmem176b	chr6	-	48833811	48841374	1670	protein_coding	transmembrane_protein_176B	834	908	968	739	750	904	939	539	338	541	524	401	560	513	24.8423	22.1809	23.3477	20.8874	25.5474	24.1432	21.5056	13.2455	9.72041	14.0452
ENSMUSG00000028028	111.866	101.926	92.7984	105.772	78.5678	99.2394	112.276	65.2192	59.5236	72.4047	51.4566	71.8399	56.352	52.929	0.6326	1.3567e-08	1.9698e-07	Alpk1	chr3	-	127670399	127780527	6448	protein_coding	alpha-kinase_1	107	118	109	105	65	104	141	71	54	74	44	75	47	53	0.825469	0.746562	0.680904	0.768636	0.573442	0.719369	0.836366	0.451888	0.40221	0.497568
ENSMUSG00000056737	33.4552	46.6441	51.933	29.2132	32.6359	29.581	55.7399	15.6159	30.8641	17.612	25.7283	17.2416	19.1836	27.9625	0.63257	0.0001022	0.00072831	Capg	chr6	+	72544391	72562983	1400	protein_coding	capping_protein_(actin_filament)_gelsolin-like	32	54	61	29	27	31	70	17	28	18	22	18	16	28	1.13701	1.57353	1.75504	0.977747	1.09708	0.987591	1.91237	0.498331	0.960538	0.55743
ENSMUSG00000025647	338.734	367.107	392.477	343.507	394.048	354.018	318.514	211.274	189.594	239.718	244.419	215.52	244.591	244.672	0.63128	1.2841e-18	5.0148e-17	Shisa5	chr9	+	109038565	109057724	1852	protein_coding	shisa_family_member_5	324	425	461	341	326	371	400	230	172	245	209	225	204	245	8.70254	9.36175	10.0264	8.69101	10.0133	8.93462	8.26078	5.09664	4.46038	5.73549
ENSMUSG00000044197	587.557	620.194	698.967	661.83	664.805	693.722	656.934	419.792	412.256	362.024	446.736	400.388	429.234	459.384	0.63117	4.2397e-28	2.8808e-26	Gpr146	chr5	+	139377697	139396415	4264	protein_coding	G_protein-coupled_receptor_146	562	718	821	657	550	727	825	457	374	370	382	418	358	460	6.55633	6.86936	7.75551	7.27285	7.33748	7.60432	7.40012	4.39841	4.21249	3.7621
ENSMUSG00000032040	630.422	551.092	607.872	564.117	618.873	645.056	559.788	361.002	412.256	405.075	347.332	378.357	387.27	374.498	0.63035	4.3417e-29	3.05e-27	Dcps	chr9	-	35124408	35176061	1445	protein_coding	decapping_enzyme_scavenger	603	638	714	560	512	676	703	393	374	414	297	395	323	375	20.7583	18.012	19.9028	18.2927	20.156	20.8652	18.6076	11.1615	12.4305	12.4216
ENSMUSG00000032135	161.003	224.583	271.584	283.066	234.495	256.687	227.737	135.95	117.945	177.098	145.014	172.416	129.49	145.805	0.62993	2.6747e-09	4.3085e-08	Mcam	chr9	+	44134469	44142727	2989	protein_coding	melanoma_cell_adhesion_molecule	154	260	319	281	194	269	286	148	107	181	124	180	108	146	2.56293	3.54859	4.29882	4.43749	3.69213	4.01393	3.65967	2.03204	1.71926	2.62542
ENSMUSG00000044811	26.1369	20.7307	29.7976	21.1544	13.2961	15.2676	10.3517	11.023	0	13.6982	5.84734	3.83146	5.99489	12.9826	0.62982	0.00053172	0.0030685	AF251705	chr11	-	114996721	115001880	1274	protein_coding	cDNA_sequence_AF251705	25	24	35	21	11	16	13	12	0	14	5	4	5	13	0.976141	0.768512	1.10658	0.778048	0.491162	0.560137	0.39028	0.386553	0	0.476436
ENSMUSG00000082199	10.4548	5.18268	12.7704	10.0735	10.8786	20.0387	21.4997	1.83716	8.81831	7.82754	3.5084	3.83146	3.59693	3.99464	0.62898	0.00050674	0.0029554	Gm15763	chr6	+	148261150	148261552	403	pseudogene	predicted_gene_15763	10	6	15	10	9	21	27	2	8	8	3	4	3	4	1.23435	0.607372	1.49924	1.17126	1.2704	2.32411	2.56248	0.203668	0.953387	0.860658
ENSMUSG00000020101	148.458	113.155	130.258	127.934	134.17	125.958	132.183	78.0794	65.035	88.0598	83.0322	75.6714	112.704	61.917	0.62895	4.7233e-09	7.355e-08	4632428N05Rik	chr10	+	60346851	60372684	4846	protein_coding	RIKEN_cDNA_4632428N05_gene	142	131	153	127	111	132	166	85	59	90	71	79	94	62	1.45763	1.1028	1.27172	1.23702	1.30299	1.21488	1.31017	0.719834	0.584727	0.805202
ENSMUSG00000044786	155.776	161.527	187.299	177.294	168.014	210.884	162.442	118.497	85.9785	136.004	114.608	102.492	116.301	86.8835	0.6281	3.6703e-10	6.7173e-09	Zfp36	chr7	-	28376784	28379255	1792	protein_coding	zinc_finger_protein_36	149	187	220	176	139	221	204	129	78	139	98	107	97	87	4.13609	4.25709	4.94503	4.63587	4.41243	5.50044	4.35406	2.95426	2.09046	3.36297
ENSMUSG00000039115	376.371	405.977	400.14	333.433	362.621	358.789	464.234	269.144	221.56	213.3	254.944	241.382	240.995	273.633	0.62723	4.3211e-16	1.397e-14	Itga9	chr9	+	118606690	118901003	7020	protein_coding	integrin_alpha_9	360	470	470	331	300	376	583	293	201	218	218	252	201	274	2.55098	2.7313	2.69678	2.2256	2.431	2.38888	3.17639	1.71288	1.37513	1.34637
ENSMUSG00000025333	7.31833	6.91024	15.3245	11.0809	24.1747	4.77113	7.16656	0.918581	3.30687	1.95689	5.84734	2.8736	5.99489	1.99732	0.62541	0.0003902	0.0023475	Gpr143	chrX	+	152781921	152808646	1586	protein_coding	G_protein-coupled_receptor_143	7	8	18	11	20	5	9	1	3	2	5	3	5	2	0.219552	0.205776	0.457145	0.327375	0.717345	0.140608	0.217041	0.0258758	0.0908453	0.054673
ENSMUSG00000097709	58.5466	54.4182	51.0817	48.3529	39.8883	34.3521	45.3882	31.2318	26.4549	27.3964	16.3725	27.7781	34.7704	28.9612	0.62479	1.7591e-05	0.00015085	2810429I04Rik	chr13	+	3478230	3501393	4769	lincRNA	RIKEN_cDNA_2810429I04_gene	56	63	60	48	33	36	57	34	24	28	14	29	29	29	0.584121	0.538917	0.506767	0.475084	0.39363	0.336681	0.45714	0.292583	0.241695	0.254552
ENSMUSG00000022425	1346.57	1642.05	1902.79	1543.26	1316.31	1639.36	1297.15	1071.98	943.559	958.874	1016.27	928.172	1027.52	852.857	0.62457	6.3763e-17	2.2105e-15	Enpp2	chr15	-	54838898	54920146	3398	protein_coding	ectonucleotide_pyrophosphatase/phosphodiesterase_2	1288	1901	2235	1532	1089	1718	1629	1167	856	980	869	969	857	854	18.8553	22.8227	26.4935	21.281	18.2308	22.5498	18.3358	14.0943	12.0986	12.504
ENSMUSG00000033161	9141.64	10052.7	10699.9	9947.59	10651.4	10625.3	9865.16	6298.71	5627.18	6716.03	6750.16	6231.87	7607.51	6387.44	0.62438	2.0419e-32	1.7343e-30	Atp1a1	chr3	-	101576219	101604603	3598	protein_coding	ATPase_Na+/K+_transporting_alpha_1_polypeptide	8744	11638	12568	9875	8812	11135	12389	6857	5105	6864	5772	6506	6345	6396	120.89	131.955	140.699	129.549	139.32	138.03	131.697	78.2114	68.1427	82.7107
ENSMUSG00000022575	21.955	31.0961	38.3112	25.1838	29.0097	21.9472	37.4253	13.7787	15.432	10.7629	16.3725	16.2837	17.9847	21.9705	0.62348	0.00015599	0.0010485	Gsdmd	chr15	+	75862339	75867404	1776	protein_coding	gasdermin_D	21	36	45	25	24	23	47	15	14	11	14	17	15	22	0.588191	0.826929	1.0206	0.664437	0.768723	0.577601	1.01218	0.346613	0.37859	0.268532
ENSMUSG00000069793	16.7276	19.0032	9.36497	7.05146	18.131	18.1303	25.4811	9.18581	1.10229	5.87066	8.18627	2.8736	13.1888	4.99331	0.62334	0.0006036	0.0034272	Slfn9	chr11	-	82979629	82991830	4530	protein_coding	schlafen_9	16	22	11	7	15	19	32	10	1	6	7	3	11	5	0.175697	0.198122	0.097809	0.0729384	0.188362	0.187068	0.27018	0.0905939	0.010602	0.0574247
ENSMUSG00000036594	30.3188	19.867	29.7976	7.05146	22.966	17.1761	11.9443	7.34865	2.20458	10.7629	11.6947	0	11.9898	6.99063	0.6231	0.00056086	0.0032158	H2-Aa	chr17	-	34282744	34287827	1132	protein_coding	histocompatibility_2_class_II_antigen_A_alpha	29	23	35	7	19	18	15	8	2	11	10	0	10	7	1.27436	0.828877	1.24539	0.291883	0.954791	0.709201	0.506812	0.290028	0.0848532	0.421301
ENSMUSG00000021701	1226.34	1284.44	1271.08	1136.29	1232.91	1235.72	1188.85	983.8	708.771	693.716	733.256	776.829	749.361	841.871	0.62248	7.7264e-23	3.8194e-21	Plk2	chr13	+	110395044	110400844	2802	protein_coding	polo-like_kinase_2	1173	1487	1493	1128	1020	1295	1493	1071	643	709	627	811	625	843	20.8244	21.6497	21.4623	19.0019	20.7078	20.6132	20.3795	15.6862	11.0212	10.9704
ENSMUSG00000032172	967.065	1022.72	1038.66	985.19	1096.32	1010.52	981.022	658.623	567.679	691.759	756.645	659.011	605.484	627.159	0.62211	3.3537e-31	2.6781e-29	Olfm2	chr9	-	20667986	20728219	1530	protein_coding	olfactomedin_2	925	1184	1220	978	907	1059	1232	717	515	707	647	688	505	628	30.0741	31.5696	32.1183	30.172	33.7223	30.8708	30.7979	19.232	16.1659	20.0343
ENSMUSG00000085912	11.5002	13.8205	11.9191	11.0809	15.7136	8.58803	8.75912	8.26723	4.40915	2.93533	0	6.70506	3.59693	4.99331	0.62206	0.00061822	0.0034964	Trp53cor1	chr17	-	29057474	29078961	2956	lincRNA	tumor_protein_p53_pathway_corepressor_1	11	16	14	11	13	9	11	9	4	3	0	7	3	5	0.18511	0.220813	0.190769	0.175649	0.250173	0.135794	0.142328	0.12495	0.064989	0.044001
ENSMUSG00000024076	198.64	202.125	258.814	245.794	203.068	224.243	206.238	143.299	164.241	106.65	116.947	131.228	1344.05	117.842	0.62193	1.0821e-09	1.8619e-08	Vit	chr17	+	78508063	78627409	2720	protein_coding	vitrin	190	234	304	244	168	235	259	156	149	109	100	137	1121	118	3.47477	3.50959	4.50183	4.23426	3.51351	3.85338	3.64194	2.35371	2.63088	1.73741
ENSMUSG00000031101	11.5002	12.9567	13.6218	7.05146	13.2961	12.4049	5.57399	5.51149	3.30687	0.978443	1.16947	6.70506	4.79591	4.99331	0.62182	0.00058319	0.0033271	Sash3	chrX	+	48146436	48161565	2677	protein_coding	SAM_and_SH3_domain_containing_3	11	15	16	7	11	13	7	6	3	1	1	7	4	5	0.204402	0.228587	0.240744	0.123426	0.233747	0.21659	0.100012	0.0919814	0.0538217	0.0161956
ENSMUSG00000036523	604.285	577.869	608.723	619.521	488.329	543.908	736.563	359.165	413.358	355.175	382.416	422.419	413.647	316.576	0.62165	3.3713e-15	1.0327e-13	Greb1	chr12	-	16670615	16800886	8058	protein_coding	gene_regulated_by_estrogen_in_breast_cancer_protein	578	669	715	615	404	570	925	391	375	363	327	441	345	317	3.56814	3.38694	3.57407	3.6025	2.85204	3.15494	4.39053	1.99134	2.23506	1.9531
ENSMUSG00000017765	297.961	290.23	311.598	286.088	244.165	267.183	254.015	164.426	201.719	172.206	192.962	168.584	176.25	172.768	0.62009	1.4009e-16	4.7081e-15	Slc12a4	chr8	-	105943590	105966115	3832	protein_coding	solute_carrier_family_12_member_4	285	336	366	284	202	280	319	179	183	176	165	176	147	173	3.69965	3.57703	3.84716	3.49824	2.99866	3.25894	3.18396	1.91701	2.29356	1.99128
ENSMUSG00000028417	11.5002	14.6843	18.7299	9.06616	15.7136	18.1303	12.7405	11.023	4.40915	4.89221	3.5084	7.66292	7.19387	5.99197	0.61997	0.00062321	0.0035182	Tal2	chr4	+	53779705	53788712	2971	protein_coding	T_cell_acute_lymphocytic_leukemia_2	11	17	22	9	13	19	16	12	4	5	3	8	6	6	0.184175	0.233429	0.298267	0.142987	0.24891	0.285229	0.205977	0.165758	0.0646609	0.0729647
ENSMUSG00000024987	79.4562	64.7835	85.1361	65.4778	129.335	51.5282	97.1466	37.6618	46.2961	51.8575	25.7283	38.3146	74.3366	48.9344	0.61968	8.0388e-05	0.00058884	Cyp26a1	chr19	+	37697808	37701528	1773	protein_coding	cytochrome_P450_family_26_subfamily_a_polypeptide_1	76	75	100	65	107	54	122	41	42	53	22	40	62	49	2.13229	1.72568	2.27183	1.73046	3.43302	1.3584	2.6318	0.949013	1.13769	1.29602
ENSMUSG00000033327	260.323	298.868	226.462	216.581	180.102	231.877	308.162	134.113	133.377	98.8227	100.574	90.0393	270.969	105.858	0.61915	0.00020838	0.0013522	Tnxb	chr17	+	34670535	34719815	12209	protein_coding	tenascin_XB	249	346	266	215	149	243	387	146	121	101	86	94	226	106	1.01452	1.15613	0.877579	0.831218	0.694237	0.887707	1.21236	0.490761	0.475981	0.358663
ENSMUSG00000006204	1345.53	1371.68	1249.8	1385.11	1022.59	1443.74	1000.13	772.527	806.875	558.691	922.71	871.658	810.509	752.99	0.6191	4.8161e-09	7.4746e-08	5430419D17Rik	chr7	+	131174402	131250945	2928	protein_coding	RIKEN_cDNA_5430419D17_gene	1287	1588	1468	1375	846	1513	1256	841	732	571	789	910	676	754	21.865	22.1253	20.1948	22.166	16.4362	23.0468	16.4067	11.7875	12.0067	8.45494
ENSMUSG00000071713	2.09095	20.7307	17.8786	19.1397	12.0874	5.72535	11.148	2.75574	1.10229	2.93533	3.5084	4.78933	7.19387	5.99197	0.61851	0.00048927	0.0028633	Csf2rb	chr15	+	78325990	78351000	4764	protein_coding	colony_stimulating_factor_2_receptor_beta_low-affinity_(granulocyte-macrophage)	2	24	21	19	10	6	14	3	1	3	3	5	6	6	0.0208833	0.205517	0.177555	0.188252	0.119407	0.0561724	0.112398	0.0258432	0.0100812	0.027302
ENSMUSG00000044716	157.867	166.71	143.029	130.956	137.796	145.042	140.146	96.451	92.5922	103.715	101.744	78.545	104.311	65.9116	0.61753	6.2686e-10	1.1182e-08	Dok7	chr5	+	35056813	35087839	2779	protein_coding	docking_protein_7	151	193	168	130	114	152	176	105	84	106	87	82	87	66	2.7029	2.8332	2.43504	2.20806	2.33355	2.43949	2.42229	1.55059	1.45169	1.65372
ENSMUSG00000053475	59.5921	47.5079	39.1626	48.3529	38.6795	47.7113	54.9436	26.6388	17.6366	41.0946	26.8977	23.9466	29.9744	29.9598	0.6162	2.6518e-05	0.00021762	Tnfaip6	chr2	+	52038009	52056686	1710	protein_coding	tumor_necrosis_factor_alpha_induced_protein_6	57	55	46	48	32	50	69	29	16	42	23	25	25	30	1.65814	1.31213	1.08354	1.32496	1.06452	1.30412	1.54332	0.695983	0.449374	1.06488
ENSMUSG00000074063	62.7286	24.1859	51.0817	46.3382	56.8106	54.3908	76.4433	27.5574	17.6366	36.2024	37.423	15.3258	35.9693	32.9558	0.61551	0.00021356	0.0013811	Osgin1	chr8	+	119434124	119446256	2302	protein_coding	oxidative_stress_induced_growth_inhibitor_1	60	28	60	46	47	57	96	30	16	37	32	16	30	33	1.29655	0.496206	1.04986	0.943212	1.16143	1.10437	1.59503	0.534827	0.33381	0.696855
ENSMUSG00000025225	106.639	118.338	154.096	145.059	125.709	113.553	129.794	71.6493	72.751	86.1029	98.2352	79.5028	69.5407	82.8889	0.61312	5.4062e-09	8.3282e-08	Nfkb2	chr19	+	46304737	46312090	3205	protein_coding	nuclear_factor_of_kappa_light_polypeptide_gene_enhancer_in_B_cells_2_p49/p100	102	137	181	144	104	119	163	78	66	88	84	83	58	83	1.58312	1.74382	2.27476	2.12076	1.84589	1.65601	1.94519	0.998766	0.989009	1.19042
ENSMUSG00000044080	457.918	381.791	407.802	338.47	414.596	411.271	330.458	246.18	220.458	245.589	279.503	230.846	261.377	270.637	0.61306	1.6276e-15	5.0859e-14	S100a1	chr3	-	90511034	90514392	677	protein_coding	S100_calcium_binding_protein_A1	438	442	479	336	343	431	415	268	200	251	239	241	218	271	32.1831	26.6344	28.4991	23.4265	28.8209	28.3944	23.4456	16.2459	14.1882	16.0743
ENSMUSG00000029622	203.868	213.354	237.53	182.331	205.485	181.303	149.701	110.23	106.922	172.206	146.183	87.1658	133.087	90.8782	0.61128	4.3309e-07	5.0422e-06	Arpc1b	chr5	+	145114215	145130705	3105	protein_coding	actin_related_protein_2/3_complex_subunit_1B	195	247	279	181	170	190	188	120	97	176	125	91	111	91	3.12403	3.24522	3.61932	2.75153	3.1145	2.7292	2.31579	1.58605	1.50036	2.45752
ENSMUSG00000051504	71.0924	79.4678	96.2038	55.4043	80.9853	96.3767	57.3324	50.522	42.9892	49.9006	61.9818	34.4832	28.7755	49.9331	0.61076	1.6298e-05	0.00014015	Siglech	chr7	+	55768178	55778925	2301	protein_coding	sialic_acid_binding_Ig-like_lectin_H	68	92	113	55	67	101	72	55	39	51	53	36	24	50	1.47006	1.6311	1.97809	1.12824	1.65638	1.95771	1.19679	0.980941	0.814015	0.960947
ENSMUSG00000001672	406.69	380.063	398.437	358.617	394.048	349.246	424.419	286.597	248.015	240.697	253.774	228.93	262.576	229.692	0.61065	5.9346e-20	2.4976e-18	Marveld3	chr8	-	109947914	109962203	2447	protein_coding	MARVEL_(membrane-associating)_domain_containing_3	389	440	468	356	326	366	533	312	225	246	217	239	219	230	7.90783	7.33546	7.70365	6.86709	7.57853	6.67099	8.33096	5.2326	4.41604	4.3586
ENSMUSG00000043263	7.31833	7.77402	8.51361	4.02941	10.8786	10.4965	12.7405	1.83716	0	5.87066	2.33893	1.91573	2.39796	4.99331	0.60719	0.0006084	0.0034513	Pyhin1	chr1	+	173630859	173647928	3497	protein_coding	pyrin_and_HIN_domain_family_member_1	7	9	10	4	9	11	16	2	0	6	2	2	2	5	0.0995736	0.104992	0.115183	0.053991	0.146402	0.140294	0.174995	0.023471	0	0.0743877
ENSMUSG00000039037	510.192	497.538	556.79	462.374	424.266	558.222	437.956	327.015	307.538	283.748	369.552	337.169	312.933	286.616	0.607	2.2354e-16	7.38e-15	St6galnac5	chr3	-	152817081	152982246	5667	protein_coding	ST6_(alpha-N-acetyl-neuraminyl-23-beta-galactosyl-13)-N-acetylgalactosaminide_alpha-26-sialyltransferase_5	488	576	654	459	351	585	550	356	279	290	316	352	261	287	4.28359	4.14647	4.64846	3.8231	3.52335	4.60411	3.71203	2.57806	2.36448	2.21866
ENSMUSG00000024339	120.23	109.7	114.934	113.831	112.412	95.4225	118.646	76.2422	77.1602	80.2323	60.8123	60.3455	76.7346	63.9143	0.60672	3.1283e-09	5.0005e-08	Tap2	chr17	+	34203527	34216321	3442	protein_coding	transporter_2_ATP-binding_cassette_sub-family_B_(MDR/TAP)	115	127	135	113	93	100	149	83	70	82	52	63	64	64	1.66199	1.50523	1.57982	1.54962	1.537	1.29578	1.65568	0.98961	0.976723	1.03288
ENSMUSG00000024079	240.459	273.818	205.178	199.456	197.024	181.303	240.478	138.706	133.377	132.09	135.658	125.48	184.643	128.827	0.6061	7.661e-10	1.3543e-08	Eif2ak2	chr17	-	78852564	78882573	4313	protein_coding	eukaryotic_translation_initiation_factor_2-alpha_kinase_2	230	317	241	198	163	190	302	151	121	135	116	131	154	129	2.65271	2.99839	2.25072	2.16692	2.14986	1.9648	2.67812	1.43679	1.34738	1.35706
ENSMUSG00000019982	182.958	143.388	132.812	170.242	147.466	142.18	130.591	107.474	104.717	80.2323	85.3711	91.9551	92.3213	99.8661	0.60533	1.013e-09	1.7495e-08	Myb	chr10	-	21124936	21160905	3692	protein_coding	myeloblastosis_oncogene	175	166	156	169	122	149	164	117	95	82	73	96	77	100	2.35786	1.83424	1.70195	2.16064	1.87975	1.79998	1.69896	1.30053	1.23579	0.962937
ENSMUSG00000021886	9.40928	6.04646	4.25681	5.03676	6.04368	7.6338	6.37027	0.918581	0	0	2.33893	1.91573	2.39796	2.99598	0.6051	0.00036723	0.002225	Gpr65	chr12	+	98268635	98276624	2049	protein_coding	G-protein_coupled_receptor_65	9	7	5	5	5	8	8	1	0	0	2	2	2	3	0.218495	0.139369	0.0982907	0.115182	0.138813	0.174137	0.149331	0.0200288	0	0
ENSMUSG00000045394	10.4548	7.77402	14.4731	7.05146	9.66988	6.67958	17.5182	4.5929	2.20458	4.89221	3.5084	1.91573	3.59693	6.99063	0.60503	0.0008147	0.0044552	Epcam	chr17	+	87635979	87651106	2040	protein_coding	epithelial_cell_adhesion_molecule	10	9	17	7	8	7	22	5	2	5	3	2	3	7	0.243844	0.179979	0.335663	0.161966	0.22308	0.153042	0.412472	0.100586	0.0470852	0.106264
ENSMUSG00000060791	7.31833	12.0929	17.0272	6.04411	7.25241	5.72535	11.148	1.83716	0	1.95689	5.84734	3.83146	3.59693	4.99331	0.60481	0.00066038	0.003709	Gmfg	chr7	+	28437447	28448233	2182	protein_coding	glia_maturation_factor_gamma	7	14	20	6	6	6	14	2	0	2	5	4	3	5	0.159582	0.261747	0.369198	0.129794	0.156422	0.122642	0.2454	0.037616	0	0.0397394
ENSMUSG00000043587	414.008	403.385	468.249	360.632	360.203	420.813	472.196	266.388	261.242	261.244	250.266	274.907	288.954	277.628	0.60461	7.6448e-18	2.8513e-16	Pxylp1	chr9	-	96823336	96892669	3189	protein_coding	2-phosphoxylose_phosphatase_1	396	467	550	358	298	441	593	290	237	267	214	287	241	278	6.17707	5.97408	6.94693	5.29889	5.31573	6.16776	7.11217	3.73199	3.56926	3.62997
ENSMUSG00000059866	1221.12	1071.95	1046.32	1256.17	1075.77	1046.79	1102.85	733.946	831.125	660.449	704.019	771.082	713.392	674.096	0.60402	6.0001e-26	3.676e-24	Tnip2	chr5	-	34496087	34513997	2099	protein_coding	TNFAIP3_interacting_protein_2	1168	1241	1229	1247	890	1097	1385	799	754	675	602	805	595	675	27.6804	24.1195	23.5844	28.0421	24.1201	23.3097	25.2371	15.6218	17.2522	13.9424
ENSMUSG00000006764	139.048	171.029	131.11	142.037	145.048	153.63	135.368	96.451	106.922	102.736	74.8459	107.281	73.1376	79.8929	0.60373	2.3095e-09	3.7592e-08	Tph2	chr10	-	115078641	115185022	2626	protein_coding	tryptophan_hydroxylase_2	133	198	154	141	120	161	170	105	97	105	64	112	61	80	2.51941	3.07595	2.36217	2.53443	2.59949	2.73448	2.47603	1.64094	1.77403	1.73357
ENSMUSG00000002007	97.2293	94.1521	63.0007	87.6396	73.7329	73.4753	79.6284	54.1963	46.2961	37.1808	38.5924	58.4298	56.352	57.9223	0.603	1.7151e-06	1.7845e-05	Srpk3	chrX	+	73774405	73778925	2711	protein_coding	serine/arginine-rich_protein_specific_kinase_3	93	109	74	87	61	77	100	59	42	38	33	61	47	58	1.70646	1.64023	1.09948	1.51477	1.27998	1.26679	1.41082	0.89314	0.744054	0.607715
ENSMUSG00000034116	17.7731	23.3221	24.6895	31.2279	21.7572	24.8099	23.8885	11.023	13.2275	19.5689	11.6947	8.62079	7.19387	17.9759	0.60269	0.00041656	0.002486	Vav1	chr17	+	57279100	57328031	2963	protein_coding	vav_1_oncogene	17	27	29	31	18	26	30	12	12	20	10	9	6	18	0.285403	0.371741	0.394231	0.49384	0.345575	0.391368	0.38725	0.166206	0.194506	0.292647
ENSMUSG00000020467	1499.21	1546.17	1316.2	1210.84	1491.58	1432.29	1307.5	954.406	588.622	991.162	1100.47	559.393	942.397	898.795	0.60197	1.875e-06	1.9357e-05	Efemp1	chr11	+	28853204	28926743	2037	protein_coding	epidermal_growth_factor-containing_fibulin-like_extracellular_matrix_protein_1	1434	1790	1546	1202	1234	1501	1642	1039	534	1013	941	584	786	900	35.0187	35.8485	30.5705	27.8529	34.4608	32.865	30.8308	20.9325	12.5903	21.5608
ENSMUSG00000029660	13.5912	21.5945	10.2163	14.1029	14.5048	14.3134	26.2774	8.26723	6.61373	4.89221	5.84734	14.368	5.99489	6.99063	0.60134	0.00089908	0.0048527	Tex26	chr5	+	149439706	149470620	1094	protein_coding	testis_expressed_26	13	25	12	14	12	15	33	9	6	5	5	15	5	7	0.591109	0.932248	0.441823	0.604042	0.623972	0.611529	1.15372	0.337615	0.263402	0.198152
ENSMUSG00000001930	353.371	404.249	329.477	349.551	410.97	284.359	412.475	291.19	192.9	212.322	246.758	227.014	199.03	253.66	0.60078	9.6767e-11	1.8718e-09	Vwf	chr6	+	125546774	125686679	8834	protein_coding	Von_Willebrand_factor_homolog	338	468	387	347	340	298	518	317	175	217	211	237	166	254	1.90327	2.16121	1.76457	1.85408	2.18939	1.50453	2.24272	1.47265	0.951404	1.065
ENSMUSG00000041673	6.27286	11.2291	5.95953	8.05881	6.04368	3.8169	18.3145	2.75574	2.20458	0	0	1.91573	5.99489	1.99732	0.60044	0.00040735	0.0024381	Lrrc18	chr14	+	32991382	33015292	2588	protein_coding	leucine_rich_repeat_containing_18	6	13	7	8	5	4	23	3	2	0	0	2	5	2	0.115326	0.204922	0.108948	0.145909	0.109902	0.0689349	0.339911	0.0475723	0.0371151	0
ENSMUSG00000004891	270.778	247.905	314.152	262.919	235.703	256.687	256.403	166.263	163.139	178.077	170.742	168.584	206.224	140.811	0.59973	1.7955e-13	4.7188e-12	Nes	chr3	+	87971078	87980451	6126	protein_coding	nestin	259	287	369	261	195	269	322	181	148	182	146	176	172	141	2.10312	1.91123	2.42624	2.01104	1.81075	1.95848	2.01039	1.21255	1.1603	1.28807
ENSMUSG00000029468	33.4552	42.3252	34.0544	25.1838	41.097	31.4894	37.4253	17.453	9.9206	20.5473	23.3893	21.073	28.7755	19.9732	0.59972	0.00014701	0.00099639	P2rx7	chr5	+	122643911	122691432	4936	protein_coding	purinergic_receptor_P2X_ligand-gated_ion_channel_7	32	49	40	25	34	33	47	19	9	21	20	22	24	20	0.32249	0.404976	0.326414	0.239068	0.391837	0.298182	0.364187	0.15797	0.0875693	0.184455
ENSMUSG00000097617	16.7276	16.4118	6.81089	11.0809	16.9223	18.1303	14.3331	4.5929	7.71602	3.91377	8.18627	9.57865	5.99489	5.99197	0.59844	0.00096792	0.0051588	Gm10687	chr9	-	44123768	44134485	1651	lincRNA	predicted_gene_10687	16	19	8	11	14	19	18	5	7	4	7	10	5	6	0.482075	0.469478	0.195176	0.314487	0.482372	0.513275	0.416992	0.124285	0.203627	0.105041
ENSMUSG00000069874	152.639	159.799	123.447	87.6396	135.378	119.278	134.572	78.0794	59.5236	78.2754	78.3543	62.2613	82.7295	121.837	0.5976	3.8319e-06	3.7429e-05	Irgm2	chr11	+	58199618	58222779	3470	protein_coding	immunity-related_GTPase_family_M_member_2	146	185	145	87	112	125	169	85	54	80	67	65	69	122	2.09298	2.17496	1.68315	1.18344	1.83607	1.60666	1.86277	1.00528	0.747393	0.999554
ENSMUSG00000032038	599.058	548.501	583.182	581.242	551.183	583.032	515.196	360.084	385.801	338.541	359.026	363.989	356.096	424.431	0.59746	1.0651e-25	6.3791e-24	St3gal4	chr9	-	35046579	35116810	2029	protein_coding	ST3_beta-galactoside_alpha-23-sialyltransferase_4	573	635	685	577	456	611	647	392	350	346	307	380	297	425	14.048	12.7673	13.5986	13.423	12.7845	13.4308	12.1962	7.92868	8.28458	7.39332
ENSMUSG00000019189	5456.34	5231.92	6660.2	5718.73	6249.16	6235.86	5911.61	3760.67	3707	3776.79	3881.46	4010.58	4387.06	3669.08	0.59614	2.3091e-30	1.7611e-28	Rnf145	chr11	+	44518964	44565520	4214	protein_coding	ring_finger_protein_145	5219	6057	7823	5677	5170	6535	7424	4094	3363	3860	3319	4187	3659	3674	61.6076	58.637	74.7762	63.5889	69.7907	69.1663	67.3822	39.8704	38.3281	39.7135
ENSMUSG00000022098	566.648	579.597	507.411	494.609	477.451	489.518	500.863	298.539	267.856	286.684	290.028	341.958	521.555	297.601	0.596	6.2745e-09	9.5711e-08	Bmp1	chr14	-	70474557	70520260	3757	protein_coding	bone_morphogenetic_protein_1	542	671	596	491	395	513	629	325	243	293	248	357	435	298	7.17629	7.28602	6.38983	6.16875	5.98077	6.09003	6.40341	3.55009	3.10634	3.38121
ENSMUSG00000034780	1046.52	1079.73	1051.43	974.109	1010.5	1076.37	982.614	635.658	735.226	681.974	689.986	688.705	634.259	684.083	0.59585	3.3121e-41	3.9928e-39	B3galt1	chr2	+	67565871	68122689	4977	protein_coding	UDP-Gal:betaGlcNAc_beta_13-galactosyltransferase_polypeptide_1	1001	1250	1235	967	836	1128	1234	692	667	697	590	719	529	685	10.0048	10.2459	9.99502	9.17097	9.5552	10.1085	9.48308	5.70605	6.43639	6.07171
ENSMUSG00000026980	75.2743	77.7402	73.2171	79.5808	68.8979	89.6972	79.6284	45.929	46.2961	37.1808	52.626	42.1461	49.1581	66.9103	0.59575	8.5973e-07	9.4666e-06	Ly75	chr2	-	60292103	60383303	6901	protein_coding	lymphocyte_antigen_75	72	90	86	79	57	94	100	50	42	38	45	44	41	67	0.518994	0.532034	0.501962	0.540346	0.469855	0.607518	0.55423	0.297341	0.292295	0.238736
ENSMUSG00000041143	59.5921	74.2851	61.298	49.3602	42.3057	55.3451	54.9436	32.1503	25.3526	43.0515	38.5924	28.736	44.3622	29.9598	0.59534	2.0816e-05	0.00017474	Tmco4	chr4	+	138972888	139059171	3318	protein_coding	transmembrane_and_coiled-coil_domains_4	57	86	72	49	35	58	69	35	23	44	33	30	37	30	0.854555	1.05738	0.874059	0.69707	0.600058	0.779641	0.79538	0.432901	0.332917	0.574939
ENSMUSG00000028841	276.006	223.719	252.854	209.529	176.475	241.419	185.534	156.159	156.525	140.896	130.98	169.542	124.694	117.842	0.595	3.7787e-09	5.9737e-08	Cnksr1	chr4	-	134228041	134238399	2468	protein_coding	connector_enhancer_of_kinase_suppressor_of_Ras_1	264	259	297	208	146	253	233	170	142	144	112	177	104	118	5.32109	4.28118	4.84725	3.97809	3.36519	4.57213	3.61088	2.82684	2.7633	2.52967
ENSMUSG00000043079	291.688	253.088	260.516	302.205	291.305	287.222	250.829	156.159	126.763	175.141	183.606	139.848	267.372	180.758	0.5949	2.9596e-08	4.121e-07	Synpo	chr18	-	60593973	60660142	5159	protein_coding	synaptopodin	279	293	306	300	241	301	315	170	115	179	157	146	223	181	2.69017	2.31692	2.38913	2.74481	2.65738	2.60222	2.33532	1.35232	1.07057	1.5043
ENSMUSG00000009941	9.40928	4.3189	5.10817	7.05146	6.04368	2.86268	4.7777	1.83716	0	0.978443	0	2.8736	0	0	0.59438	0.00020889	0.0013548	Nxf2	chrX	-	134944526	134964754	2393	protein_coding	nuclear_RNA_export_factor_2	9	5	6	7	5	3	6	2	0	1	0	3	0	0	0.187086	0.0852386	0.100993	0.138074	0.118858	0.0559142	0.0958982	0.0342992	0	0.0181177
ENSMUSG00000074577	9.40928	6.91024	12.7704	16.1176	8.46115	8.58803	9.55541	6.43007	3.30687	3.91377	4.67787	2.8736	2.39796	4.99331	0.59296	0.0010871	0.0056998	Fam65c	chr2	-	167980164	168010618	3580	protein_coding	family_with_sequence_similarity_65_member_C	9	8	15	16	7	9	12	7	3	4	4	3	2	5	0.125055	0.0911624	0.168769	0.210957	0.111229	0.112125	0.128204	0.0802439	0.040246	0.0484421
ENSMUSG00000030681	204.913	200.397	200.07	148.081	230.869	207.067	211.812	124.008	97.0014	142.853	125.133	145.596	116.301	144.806	0.59287	1.0887e-09	1.8716e-08	Mvp	chr7	-	126986860	127014621	2837	protein_coding	major_vault_protein	196	232	235	147	191	217	266	135	88	146	107	152	97	145	3.43668	3.33609	3.33651	2.44576	3.82979	3.41149	3.58612	1.95286	1.48973	2.2312
ENSMUSG00000032327	152.639	186.577	326.071	233.706	221.199	211.838	197.478	124.008	84.8762	172.206	170.742	126.438	135.484	131.823	0.5914	5.0868e-06	4.857e-05	Stra6	chr9	+	58063788	58153996	3077	protein_coding	stimulated_by_retinoic_acid_gene_6	146	216	383	232	183	222	248	135	77	176	146	132	113	132	2.3603	2.86375	5.01367	3.55891	3.38318	3.21787	3.08266	1.80054	1.20184	2.47988
ENSMUSG00000014686	17.7731	20.7307	16.1759	23.1691	21.7572	10.4965	20.7034	13.7787	3.30687	12.7198	9.35574	10.5365	7.19387	7.98929	0.59093	0.00090727	0.0048871	Ceacam16	chr7	-	19852097	19861299	1635	protein_coding	carcinoembryonic_antigen-related_cell_adhesion_molecule_16	17	24	19	23	18	11	26	15	3	13	8	11	6	8	0.517217	0.598828	0.46808	0.663998	0.626262	0.300067	0.608216	0.376505	0.0881227	0.344724
ENSMUSG00000079019	10.4548	0.86378	6.81089	16.1176	3.62621	15.2676	12.7405	2.75574	0	3.91377	0	2.8736	0	1.99732	0.59088	0.00026498	0.0016632	Insl3	chr8	+	71689214	71690575	623	protein_coding	insulin-like_3	10	1	8	16	3	16	16	3	0	4	0	3	0	2	0.798461	0.0654818	0.517233	1.21224	0.273927	1.14545	0.982277	0.19762	0	0.278367
ENSMUSG00000022056	2.09095	8.6378	15.3245	8.05881	9.66988	13.3592	7.96284	4.5929	0	4.89221	2.33893	0	2.39796	3.99464	0.58952	0.00065316	0.0036707	Adam7	chr14	-	68497336	68533689	3469	protein_coding	a_disintegrin_and_metallopeptidase_domain_7	2	10	18	8	8	14	10	5	0	5	2	0	2	4	0.0286792	0.117599	0.209003	0.108853	0.131186	0.179998	0.110255	0.0591511	0	0.0624901
ENSMUSG00000028128	202.822	208.171	268.179	223.632	197.024	222.334	237.293	161.67	149.911	146.766	152.031	136.017	146.275	121.837	0.58941	3.5777e-12	8.2332e-11	F3	chr3	+	121723537	121735052	1876	protein_coding	coagulation_factor_III	194	241	315	222	163	233	298	176	136	150	130	142	122	122	5.14411	5.24075	6.76336	5.58569	4.94261	5.53945	6.07555	3.85014	3.48169	3.4666
ENSMUSG00000006345	58.5466	50.0993	72.3657	67.4925	56.8106	61.0704	72.4618	26.6388	19.8412	32.2886	36.2535	14.368	82.7295	26.9638	0.58919	0.00061408	0.0034782	Ggt1	chr10	+	75561604	75586200	2167	protein_coding	gamma-glutamyltransferase_1	56	58	85	67	47	64	91	29	18	33	31	15	69	27	1.2855	1.09189	1.57995	1.45939	1.23379	1.31724	1.60614	0.549207	0.398931	0.660238
ENSMUSG00000029084	73.1833	54.4182	60.4466	71.5219	48.3494	46.757	62.1101	35.8247	39.6824	41.0946	25.7283	21.073	35.9693	50.9317	0.58884	4.872e-05	0.00037588	Cd38	chr5	+	43868809	43912375	3014	protein_coding	CD38_antigen	70	63	71	71	40	49	78	39	36	42	22	22	30	51	1.1553	0.852719	0.948855	1.11192	0.75495	0.725097	0.989814	0.531029	0.573646	0.60416
ENSMUSG00000039095	67.9559	57.0095	49.3789	49.3602	38.6795	83.9718	38.2216	44.0919	19.8412	34.2455	25.7283	23.9466	35.9693	37.9491	0.58852	0.00019844	0.0012952	En2	chr5	+	28165694	28172166	3539	protein_coding	engrailed_2	65	66	58	49	32	88	48	48	18	35	22	25	30	38	0.913639	0.760803	0.660134	0.65354	0.514364	1.10904	0.518756	0.556619	0.244274	0.428779
ENSMUSG00000034845	179.822	209.899	196.664	199.456	222.407	224.243	189.516	101.044	133.377	142.853	160.217	118.775	118.699	144.806	0.58845	9.473e-11	1.8401e-09	Plvap	chr8	-	71497754	71511769	2015	protein_coding	plasmalemma_vesicle_associated_protein	172	243	231	198	184	235	238	110	121	146	137	124	99	145	4.24615	4.91972	4.61765	4.63817	5.1945	5.20159	4.51756	2.24034	2.884	3.1414
ENSMUSG00000070034	21.955	22.4583	13.6218	14.1029	19.3398	14.3134	10.3517	9.18581	2.20458	16.6335	4.67787	4.78933	7.19387	6.99063	0.58763	0.001227	0.0063251	Sp110	chr1	-	85576899	85598817	2583	protein_coding	Sp110_nuclear_body_protein	21	26	16	14	16	15	13	10	2	17	4	5	6	7	0.404424	0.410637	0.249505	0.255835	0.352368	0.259006	0.192496	0.158881	0.0371869	0.285345
ENSMUSG00000033207	177.731	169.301	127.704	166.213	172.849	130.729	140.146	101.044	114.638	100.78	88.8795	69.9242	107.908	107.855	0.58717	3.2218e-08	4.4661e-07	Mamdc2	chr19	-	23302609	23448322	3338	protein_coding	MAM_domain_containing_2	170	196	150	165	143	137	176	110	104	103	76	73	90	108	2.5334	2.3954	1.81005	2.33321	2.43697	1.83053	2.01664	1.35239	1.49634	1.33782
ENSMUSG00000018008	73.1833	64.7835	77.4739	48.3529	50.7669	44.8486	51.7585	41.3361	19.8412	33.267	36.2535	25.8624	49.1581	39.9464	0.58642	8.9607e-05	0.00064748	Cyth4	chr15	+	78597047	78622019	2791	protein_coding	cytohesin_4	70	75	91	48	42	47	65	45	18	34	31	27	41	40	1.24761	1.09625	1.31331	0.811779	0.856034	0.751072	0.890749	0.661683	0.30974	0.528159
ENSMUSG00000085156	163.094	156.344	176.232	219.603	189.771	167.944	150.498	115.741	88.1831	90.0167	99.4047	140.806	115.102	128.827	0.58616	2.9732e-08	4.1368e-07	Gm11974	chr11	-	6525591	6528760	675	processed_transcript	predicted_gene_11974	156	181	207	218	157	176	189	126	80	92	85	147	96	129	11.4964	10.9392	12.3524	15.2444	13.2311	11.6293	10.7093	7.66062	5.69208	5.90921
ENSMUSG00000004791	37.6371	44.9166	41.7167	18.1323	31.4271	23.8556	27.0737	16.5345	12.1252	18.5904	11.6947	8.62079	37.1683	11.9839	0.58481	0.00097407	0.0051841	Pgf	chr12	-	85166639	85177296	1582	protein_coding	placental_growth_factor	36	52	49	18	26	25	34	18	11	19	10	9	31	12	1.13198	1.34093	1.2476	0.53706	0.934907	0.704818	0.822005	0.466942	0.333942	0.520706
ENSMUSG00000057729	28.2278	18.1394	14.4731	19.1397	32.6359	22.9014	11.148	10.1044	17.6366	5.87066	4.67787	8.62079	13.1888	10.9853	0.58477	0.0011563	0.0060118	Prtn3	chr10	+	79874476	79883174	1025	protein_coding	proteinase_3	27	21	17	19	27	24	14	11	16	6	4	9	11	11	1.31033	0.835804	0.668051	0.874956	1.49845	1.04431	0.522404	0.440419	0.749688	0.253789
ENSMUSG00000011148	570.83	632.287	670.021	701.117	626.125	686.088	572.528	428.059	331.789	415.838	423.347	411.882	468.8	450.396	0.58402	6.2904e-18	2.3603e-16	Adssl1	chr12	+	112620045	112641354	1846	protein_coding	adenylosuccinate_synthetase_like_1	546	732	787	696	518	719	719	466	301	425	362	430	391	451	14.713	16.1766	17.1723	17.7965	15.9624	17.3716	14.897	10.3598	7.83104	9.98166
ENSMUSG00000059883	104.548	89.8332	40.8653	64.4705	82.194	71.5669	74.0544	38.5804	45.1938	62.6203	38.5924	49.809	39.5663	41.9438	0.5824	6.5962e-05	0.00049421	Irak4	chr15	+	94543643	94581815	3437	protein_coding	interleukin-1_receptor-associated_kinase_4	100	104	48	64	68	75	93	42	41	64	33	52	33	42	1.44731	1.23442	0.562531	0.878936	1.12546	0.973251	1.03492	0.501495	0.572913	0.807321
ENSMUSG00000073421	48.0919	44.0528	40.014	38.2793	44.7232	42.9401	36.6291	22.0459	8.81831	26.4179	39.7619	27.7781	29.9744	16.9772	0.58212	0.00024195	0.0015336	H2-Ab1	chr17	+	34263209	34269418	1211	protein_coding	histocompatibility_2_class_II_antigen_A_beta_1	46	51	47	38	37	45	46	24	8	27	34	29	25	17	1.88954	1.71805	1.56329	1.48114	1.73804	1.65734	1.45283	0.813325	0.317271	0.966641
ENSMUSG00000032000	14.6367	31.0961	19.5813	23.1691	19.3398	28.6268	27.0737	7.34865	16.5343	14.6766	11.6947	6.70506	20.3826	10.9853	0.58135	0.00089118	0.004817	Birc3	chr9	-	7848699	7873186	2909	protein_coding	baculoviral_IAP_repeat-containing_3	14	36	23	23	16	30	34	8	15	15	10	7	17	11	0.239401	0.504856	0.31847	0.373199	0.31288	0.459961	0.447031	0.112861	0.247646	0.22356
ENSMUSG00000022952	36.5917	38.0063	45.9735	42.3088	45.932	38.169	21.4997	26.6388	18.7389	27.3964	24.5588	20.1152	15.5867	22.9692	0.57648	0.00023605	0.0015008	Runx1	chr16	-	92601466	92826149	5861	protein_coding	runt_related_transcription_factor_1	35	44	54	42	38	40	27	29	17	28	21	21	13	23	0.297056	0.30626	0.371113	0.338247	0.368819	0.304391	0.176195	0.203059	0.139303	0.207125
ENSMUSG00000021838	315.734	322.19	378.004	381.786	350.533	402.683	336.032	207.599	218.253	233.848	275.994	256.708	246.989	197.735	0.57641	1.8365e-13	4.8198e-12	Samd4	chr14	+	46882854	47105817	6870	protein_coding	sterile_alpha_motif_domain_containing_4	302	373	444	379	290	422	422	226	198	239	236	268	206	198	2.18671	2.21493	2.60322	2.60399	2.40128	2.73968	2.3494	1.35005	1.38418	1.5083
ENSMUSG00000020142	634.604	590.826	895.632	792.785	813.479	812.046	576.51	376.618	376.983	507.812	528.599	467.438	579.106	475.363	0.57628	7.9725e-09	1.1985e-07	Slc1a4	chr11	-	20302180	20332713	3926	protein_coding	solute_carrier_family_1_(glutamate/neutral_amino_acid_transporter)_member_4	607	684	1052	787	673	851	724	410	342	519	452	488	483	476	7.69095	7.10746	10.7932	9.46196	9.75138	9.66769	7.05327	4.28579	4.1837	5.73143
ENSMUSG00000027322	14.6367	14.6843	15.3245	12.0882	10.8786	10.4965	14.3331	9.18581	1.10229	4.89221	11.6947	0	7.19387	4.99331	0.57569	0.0015197	0.0076009	Siglec1	chr2	-	131069220	131086765	6387	protein_coding	sialic_acid_binding_Ig-like_lectin_1_sialoadhesin	14	17	18	12	9	11	18	10	1	5	10	0	6	5	0.109037	0.108583	0.113517	0.0886831	0.080158	0.0768138	0.10779	0.064254	0.00751948	0.0339405
ENSMUSG00000079363	53.3193	59.6009	33.2031	26.1911	37.4708	35.3063	39.0179	26.6388	25.3526	30.3317	17.542	21.073	16.7857	26.9638	0.57538	0.00031273	0.001926	Gbp4	chr5	-	105115767	105139586	4538	protein_coding	guanylate_binding_protein_4	51	69	39	26	31	37	49	29	23	31	15	22	14	27	0.559046	0.620288	0.346166	0.270437	0.388596	0.363647	0.412984	0.262259	0.243415	0.296171
ENSMUSG00000031565	1021.43	1061.59	1174.03	1109.09	1174.89	1099.27	1004.11	629.228	566.576	827.762	875.931	563.225	870.458	670.102	0.57531	3.9672e-11	8.0666e-10	Fgfr1	chr8	+	25513654	25575714	5041	protein_coding	fibroblast_growth_factor_receptor_1	977	1229	1379	1101	972	1152	1261	685	514	846	749	588	726	671	9.64095	9.9459	11.0187	10.3093	10.9686	10.1925	9.56754	5.57662	4.89701	7.27611
ENSMUSG00000092242	33.4552	16.4118	17.8786	27.1985	6.04368	18.1303	22.296	15.6159	5.51144	11.7413	8.18627	6.70506	10.7908	9.98661	0.57468	0.0014766	0.0074232	Gm20515	chr3	-	34427373	34435097	4824	lincRNA	predicted_gene_20515	32	19	21	27	5	19	28	17	5	12	7	7	9	10	0.329978	0.160678	0.175346	0.264188	0.0589609	0.175667	0.222	0.144623	0.0497791	0.10785
ENSMUSG00000039899	18.8186	23.3221	30.649	25.1838	16.9223	28.6268	23.8885	6.43007	0	22.5042	14.0336	12.4523	10.7908	14.9799	0.57428	0.0014985	0.007511	Fgl2	chr5	+	21372642	21378374	3788	protein_coding	fibrinogen-like_protein_2	18	27	36	25	14	30	30	7	0	23	12	13	9	15	0.236376	0.290779	0.382805	0.311521	0.210242	0.353228	0.30291	0.0758377	0	0.263247
ENSMUSG00000028037	32.4098	44.0528	31.5004	7.05146	43.5145	15.2676	34.2402	15.6159	12.1252	14.6766	17.542	7.66292	21.5816	12.9826	0.57385	0.0014902	0.0074816	Ifi44	chr3	-	151730922	151749947	4064	protein_coding	interferon-induced_protein_44	31	51	37	7	36	16	43	17	11	15	15	8	18	13	0.379446	0.511947	0.366718	0.081302	0.503907	0.175594	0.404685	0.171669	0.129994	0.160023
ENSMUSG00000029206	58.5466	63.056	73.2171	57.419	55.6018	62.0246	68.4804	34.9061	41.887	39.1377	30.4061	42.1461	43.1632	45.9384	0.57303	5.2521e-06	5.0047e-05	Nsun7	chr5	+	66259912	66298016	3617	protein_coding	NOL1/NOP2/Sun_domain_family_member_7	56	73	86	57	46	65	86	38	38	40	26	44	36	46	0.770161	0.823348	0.957711	0.743846	0.723454	0.801509	0.909394	0.431154	0.504568	0.479465
ENSMUSG00000021756	4327.22	4472.66	4226.16	4258.07	4394.96	4435.24	4300.73	2734.62	2967.36	2968.59	2917.82	2920.53	3142.52	2744.32	0.57264	9.1087e-70	2.5404e-67	Il6st	chr13	+	112464070	112510086	8678	protein_coding	interleukin_6_signal_transducer	4139	5178	4964	4227	3636	4648	5401	2977	2692	3034	2495	3049	2621	2748	23.7256	24.3417	23.0408	22.9916	23.8345	23.8886	23.8044	14.0785	14.8984	15.158
ENSMUSG00000032363	36.5917	24.1859	28.9463	34.2499	31.4271	31.4894	38.2216	20.2088	12.1252	15.6551	18.7115	25.8624	17.9847	20.9719	0.57231	0.00028844	0.0017936	Adamts7	chr9	+	90163069	90208071	5379	protein_coding	a_disintegrin-like_and_metallopeptidase_(reprolysin_type)_with_thrombospondin_type_1_motif_7	35	28	34	34	26	33	48	22	11	16	16	27	15	21	0.323674	0.212356	0.254602	0.298355	0.274962	0.273625	0.341304	0.167849	0.0982145	0.128963
ENSMUSG00000057766	552.011	532.953	515.073	443.235	499.208	499.06	583.676	357.328	340.607	325.821	348.501	318.969	354.897	367.507	0.57179	3.8125e-20	1.6265e-18	Ankrd29	chr18	-	12252362	12305720	3242	protein_coding	ankyrin_repeat_domain_29	528	617	605	440	413	523	733	389	309	333	298	333	296	368	8.10145	7.76392	7.51669	6.40614	7.24667	7.19502	8.64755	4.92418	4.57752	4.45325
ENSMUSG00000101643	50.1828	33.6874	34.0544	34.2499	21.7572	20.993	36.6291	11.9416	27.5572	8.80598	11.6947	34.4832	15.5867	9.98661	0.56945	0.0013818	0.0070147	RP23-48C24.3	chr7	+	40876543	40885785	2694	lincRNA	predicted_gene_28307	48	39	40	34	18	22	46	13	25	9	10	36	13	10	0.88631	0.590576	0.598063	0.595714	0.380081	0.364224	0.653074	0.198035	0.445684	0.144841
ENSMUSG00000027074	50.1828	38.8701	37.4599	37.272	37.4708	38.169	32.6476	22.9645	30.8641	20.5473	16.3725	20.1152	27.5765	25.9652	0.56914	0.00013588	0.00092901	Slc43a3	chr2	+	84936579	84958509	2621	protein_coding	solute_carrier_family_43_member_3	48	45	44	37	31	40	41	25	28	21	14	21	23	26	0.910995	0.700413	0.676192	0.666333	0.672816	0.68067	0.5983	0.391444	0.513069	0.347375
ENSMUSG00000006445	119.184	111.428	132.812	118.867	141.422	146.951	130.591	75.3236	66.1373	66.5341	68.9986	58.4298	158.265	63.9143	0.56899	6.0199e-05	0.0004551	Epha2	chr4	+	141301240	141329384	3913	protein_coding	Eph_receptor_A2	114	129	156	118	117	154	164	82	60	68	59	61	132	64	1.44923	1.3449	1.60583	1.42341	1.70089	1.75531	1.60301	0.860005	0.73642	0.753433
ENSMUSG00000045761	26.1369	13.8205	21.284	22.1617	20.5485	21.9472	24.6848	9.18581	13.2275	6.8491	15.2031	15.3258	14.3877	8.98795	0.5684	0.00098747	0.0052465	Fam179a	chr17	+	71673261	71729669	3503	protein_coding	family_with_sequence_similarity_179_member_A	25	16	25	22	17	23	31	10	12	7	13	16	12	9	0.355011	0.186333	0.287465	0.296442	0.276064	0.29284	0.338473	0.117154	0.164523	0.086637
ENSMUSG00000000386	4.1819	3.45512	8.51361	8.05881	6.04368	5.72535	10.3517	3.67432	0	1.95689	0	2.8736	2.39796	0	0.56766	0.00069633	0.003884	Mx1	chr16	-	97447035	97462907	3385	protein_coding	MX_dynamin-like_GTPase_1	4	4	10	8	5	6	13	4	0	2	0	3	2	0	0.0587818	0.048207	0.118994	0.111555	0.0840258	0.0790562	0.146888	0.0484952	0	0.0256163
ENSMUSG00000060568	1733.4	1770.75	1943.66	2012.69	1924.31	2105.02	1710.42	1122.51	1231.26	1229.9	1256.01	1266.3	1376.43	1350.19	0.567	6.2012e-26	3.7868e-24	Fam78b	chr1	+	167001417	167091302	4986	protein_coding	family_with_sequence_similarity_78_member_B	1658	2050	2283	1998	1592	2206	2148	1222	1117	1257	1074	1322	1148	1352	16.5415	16.773	18.4433	18.9147	18.1632	19.7332	16.4772	10.0581	10.7593	10.9302
ENSMUSG00000091649	5.22738	3.45512	9.36497	8.05881	10.8786	3.8169	6.37027	1.83716	0	1.95689	2.33893	2.8736	0	2.99598	0.56655	0.00084902	0.004624	Phf11b	chr14	-	59320964	59341351	1184	protein_coding	PHD_finger_protein_11B	5	4	11	8	9	4	8	2	0	2	2	3	0	3	0.210068	0.137822	0.374219	0.31893	0.432406	0.150679	0.258428	0.0693227	0	0.0732359
ENSMUSG00000026104	563.512	632.287	521.884	592.323	581.402	614.521	541.473	372.944	371.471	401.161	359.026	386.978	411.249	401.462	0.56651	7.877e-24	4.1697e-22	Stat1	chr1	+	52119440	52161865	5151	protein_coding	signal_transducer_and_activator_of_transcription_1	539	732	613	588	481	644	680	406	337	410	307	404	343	402	5.20522	5.79734	4.79351	5.38818	5.31196	5.57619	5.04916	3.23468	3.14212	3.45095
ENSMUSG00000055413	16.7276	31.0961	17.8786	14.1029	14.5048	7.6338	23.0922	11.023	11.0229	8.80598	12.8641	2.8736	8.39284	4.99331	0.56353	0.0019254	0.0093351	H2-Q5	chr17	+	35394126	35397800	1156	polymorphic_pseudogene	histocompatibility_2_Q_region_locus_5	16	36	21	14	12	8	29	12	10	9	11	3	7	5	0.6885	1.27044	0.731722	0.571646	0.590507	0.308657	0.959494	0.426011	0.415458	0.337544
ENSMUSG00000009585	100.366	76.8765	77.4739	62.4558	64.063	74.4296	72.4618	59.7078	45.1938	44.0299	46.7787	35.441	50.3571	53.9277	0.56299	8.3102e-06	7.6158e-05	Apobec3	chr15	+	79891659	79915906	2765	protein_coding	apolipoprotein_B_mRNA_editing_enzyme_catalytic_polypeptide_3	96	89	91	62	53	78	91	65	41	45	40	37	42	54	1.7271	1.31312	1.32566	1.05841	1.09039	1.25818	1.25878	0.964751	0.712153	0.705607
ENSMUSG00000037224	4146.36	3736.71	3747.69	3946.8	3638.29	3836.94	3635.83	2707.98	2652.11	2418.71	2493.3	2668.61	2425.53	2638.46	0.56066	6.5192e-48	9.9851e-46	Zfyve28	chr5	-	34194874	34288449	4002	protein_coding	zinc_finger_FYVE_domain_containing_28	3966	4326	4402	3918	3010	4021	4566	2948	2406	2472	2132	2786	2023	2642	49.2966	44.0979	44.3055	46.2109	42.7849	44.8126	43.6376	30.2306	28.8737	26.7804
ENSMUSG00000089791	26.1369	14.6843	11.9191	33.2426	36.2621	34.3521	25.4811	1.83716	8.81831	28.3748	16.3725	2.8736	5.99489	8.98795	0.56038	0.0019047	0.0092399	Gm3555	chr1	+	98457768	98459162	1395	pseudogene	predicted_pseudogene_3555	25	17	14	33	30	36	32	2	8	29	14	3	5	9	0.891472	0.497146	0.404239	1.1166	1.22334	1.15099	0.87736	0.0588373	0.275423	0.9013
ENSMUSG00000030123	419.236	436.209	470.803	425.102	501.625	377.873	451.493	285.679	327.38	300.382	305.231	264.371	299.744	280.624	0.56018	3.0565e-17	1.0879e-15	Plxnd1	chr6	-	115954811	115995005	6907	protein_coding	plexin_D1	401	505	553	422	415	396	567	311	297	307	261	276	250	281	2.888	2.98271	3.22493	2.8839	3.41791	2.55711	3.13975	1.84786	2.06515	1.92706
ENSMUSG00000040569	61.6831	158.072	194.11	138.007	126.917	131.683	117.054	50.522	52.9098	91.9736	125.133	40.2303	83.9284	47.9357	0.55994	0.0015908	0.0079182	Slc26a7	chr4	-	14502430	14621805	5165	protein_coding	solute_carrier_family_26_member_7	59	183	228	137	105	138	147	55	48	94	107	42	70	48	0.568229	1.44541	1.77807	1.25201	1.15643	1.19166	1.08855	0.437008	0.446329	0.789048
ENSMUSG00000032577	48.0919	41.4615	52.7844	65.4778	50.7669	62.0246	43.7956	29.3946	22.0458	31.3102	51.4566	24.9045	41.9642	20.9719	0.55955	0.00023951	0.0015207	Mapkapk3	chr9	-	107254927	107289877	3729	protein_coding	mitogen-activated_protein_kinase-activated_protein_kinase_3	46	48	62	65	42	65	55	32	20	32	44	26	35	21	0.613631	0.525119	0.669705	0.822768	0.640705	0.777435	0.564121	0.352172	0.257586	0.372052
ENSMUSG00000032648	2706.74	2850.48	2968.7	3066.38	2856.24	3038.25	2898.47	1983.22	1948.85	2056.69	2081.65	1873.58	1864.41	1970.36	0.55955	2.9474e-53	5.1958e-51	Pygm	chr19	+	6384399	6398459	2874	protein_coding	muscle_glycogen_phosphorylase	2589	3300	3487	3044	2363	3184	3640	2159	1768	2102	1780	1956	1555	1973	44.8112	46.8421	48.8708	49.9936	46.7712	49.4117	48.4414	30.8292	29.5447	31.7097
ENSMUSG00000032841	93.0474	104.517	126.853	86.6322	106.369	86.8345	96.3504	67.0564	71.6487	68.491	53.7955	59.3877	73.1376	61.917	0.55894	5.0888e-07	5.8372e-06	Prr5l	chr2	-	101714285	101883027	4296	protein_coding	proline_rich_5_like	89	121	149	86	88	91	121	73	65	70	46	62	61	62	1.03055	1.14903	1.39703	0.944911	1.16525	0.944758	1.07727	0.697358	0.726664	0.706447
ENSMUSG00000033170	182.958	177.939	199.218	210.536	178.893	197.525	208.626	120.334	130.07	108.607	123.964	152.301	129.49	135.818	0.55875	2.8524e-11	5.9353e-10	Card10	chr15	-	78775138	78803042	4726	protein_coding	caspase_recruitment_domain_family_member_10	175	206	234	209	148	207	262	131	118	111	106	159	108	136	1.84199	1.77821	1.99437	2.08742	1.78143	1.95353	2.12036	1.13756	1.19915	1.0183
ENSMUSG00000050410	55.4102	54.4182	45.9735	36.2646	50.7669	50.5739	50.1659	37.6618	28.6595	26.4179	18.7115	31.6096	40.7652	28.9612	0.55845	8.6316e-05	0.00062832	Tcf19	chr17	-	35512734	35516824	1732	protein_coding	transcription_factor_19	53	63	54	36	42	53	63	41	26	27	16	33	34	29	1.52219	1.48389	1.25583	0.981095	1.37944	1.36481	1.39122	0.971478	0.720958	0.675868
ENSMUSG00000071112	92.0019	65.6473	89.3929	104.765	90.6552	85.8803	82.8135	66.1378	57.319	49.9006	44.4398	50.7669	63.5458	59.9197	0.55825	2.2179e-06	2.2671e-05	B230216G23Rik	chr6	+	142413441	142419730	1613	protein_coding	RIKEN_cDNA_B230216G23_gene	88	76	105	104	75	90	104	72	52	51	38	53	53	60	2.71388	1.92215	2.62204	3.04338	2.64502	2.48858	2.46605	1.83187	1.54829	1.37082
ENSMUSG00000060441	13.5912	19.867	17.8786	12.0882	27.8009	21.9472	13.5368	9.18581	9.9206	9.78443	11.6947	6.70506	7.19387	11.9839	0.55737	0.0016833	0.0083123	Trim5	chr7	-	104263386	104288094	3655	protein_coding	tripartite_motif-containing_5	13	23	21	12	23	23	17	10	9	10	10	7	6	12	0.176928	0.256714	0.231428	0.154971	0.357966	0.280662	0.177895	0.112282	0.11826	0.11862
ENSMUSG00000030214	21.955	14.6843	29.7976	21.1544	24.1747	27.6725	30.2588	7.34865	17.6366	15.6551	3.5084	7.66292	3.59693	25.9652	0.55557	0.0022126	0.010493	Plbd1	chr6	-	136612070	136661928	2058	protein_coding	phospholipase_B_domain_containing_1	21	17	35	21	20	29	38	8	16	16	3	8	3	26	0.507593	0.336986	0.685026	0.481649	0.552823	0.628487	0.70622	0.15953	0.373387	0.33707
ENSMUSG00000092060	902.246	858.598	831.78	761.558	779.634	831.13	908.56	546.556	660.271	502.919	535.616	612.076	541.938	559.25	0.55485	1.2233e-20	5.3913e-19	Bend4	chr5	-	67392147	67427799	7935	protein_coding	BEN_domain_containing_4	863	994	977	756	645	871	1141	595	599	514	458	639	452	560	5.4101	5.11032	4.95943	4.49709	4.62396	4.8957	5.49972	3.07728	3.62547	2.80842
ENSMUSG00000022790	2624.14	2469.55	2269.73	2400.52	2175.72	2532.51	2173.06	1568.94	1473.76	1642.8	1583.46	1628.37	1636.6	1717.7	0.55484	2.1925e-31	1.7735e-29	Igsf11	chr16	+	38901471	39027159	3443	protein_coding	immunoglobulin_superfamily_member_11	2510	2859	2666	2383	1800	2654	2729	1708	1337	1679	1354	1700	1365	1720	36.2642	33.8755	31.1894	32.6696	29.7397	34.3801	30.3158	20.3586	18.65	21.1426
ENSMUSG00000056515	281.233	272.955	271.584	232.698	256.252	266.229	296.218	210.355	156.525	190.796	171.912	167.626	183.444	173.767	0.55476	3.1568e-13	8.1027e-12	Rab31	chr17	-	65651726	65772752	3476	protein_coding	RAB31_member_RAS_oncogene_family	269	316	319	231	212	279	372	229	142	195	147	175	153	174	3.84959	3.70865	3.69654	3.13681	3.46942	3.57987	4.09322	2.70366	1.96197	2.43221
ENSMUSG00000002602	612.649	615.875	554.236	523.823	601.95	552.496	555.806	376.618	316.357	453.997	457.262	320.885	327.321	426.428	0.55365	5.1744e-12	1.1663e-10	Axl	chr7	-	25757273	25788705	4265	protein_coding	AXL_receptor_tyrosine_kinase	586	713	651	520	498	579	698	410	287	464	391	335	273	427	6.83471	6.81992	6.14818	5.75494	6.6422	6.05484	6.25948	3.94513	3.23182	4.71677
ENSMUSG00000051159	110.82	108.836	115.785	110.809	101.534	107.827	96.3504	69.8122	78.2625	68.491	68.9986	52.6826	98.3162	56.9237	0.55318	6.1443e-07	6.9542e-06	Cited1	chrX	-	102247381	102252181	1090	protein_coding	Cbp/p300-interacting_transactivator_with_Glu/Asp-rich_carboxy-terminal_domain_1	106	126	136	110	84	113	121	76	71	70	59	55	82	57	4.8375	4.71577	5.0257	4.76346	4.38383	4.62376	4.24581	2.86144	3.12836	2.78431
ENSMUSG00000049625	46.0009	32.8237	57.8926	42.3088	49.5582	47.7113	61.3139	32.1503	14.3297	29.3533	38.5924	27.7781	25.1785	37.9491	0.55275	0.00029672	0.001839	Tifab	chr13	-	56173703	56178885	3498	protein_coding	TRAF-interacting_protein_with_forkhead-associated_domain_family_member_B	44	38	68	42	41	50	77	35	13	30	33	29	21	38	0.625712	0.443172	0.783021	0.566743	0.666754	0.63752	0.841924	0.410625	0.178488	0.371832
ENSMUSG00000052726	52.2738	56.1457	39.1626	45.3308	37.4708	32.4437	30.2588	30.3132	36.3755	23.4826	19.8809	21.073	20.3826	24.9665	0.55217	0.00037109	0.002247	Kcnt2	chr1	+	140246216	140612063	5718	protein_coding	potassium_channel_subfamily_T_member_2	50	65	46	45	31	34	38	33	33	24	17	22	17	25	0.434978	0.463744	0.32404	0.371471	0.308403	0.265203	0.25418	0.236846	0.277175	0.181975
ENSMUSG00000038167	43.91	42.3252	40.014	41.3014	42.3057	41.0317	54.9436	32.1503	24.2503	21.5257	28.0672	12.4523	45.5612	21.9705	0.55202	0.00043326	0.0025725	Plekhg6	chr6	-	125362660	125380793	3299	protein_coding	pleckstrin_homology_domain_containing_family_G_(with_RhoGef_domain)_member_6	42	49	47	41	35	43	69	35	22	22	24	13	38	22	0.633299	0.60593	0.573852	0.586622	0.603514	0.581339	0.799961	0.435394	0.320276	0.289125
ENSMUSG00000062960	4987.97	4850.99	4117.18	3935.72	4489.24	4339.82	5875.78	3060.71	3140.42	3164.28	2985.65	3222.26	2680.91	3624.14	0.55125	3.3488e-14	9.3958e-13	Kdr	chr5	-	75932827	75978458	5924	protein_coding	kinase_insert_domain_protein_receptor	4771	5616	4836	3907	3714	4548	7379	3332	2849	3234	2553	3364	2236	3629	40.0623	38.6742	32.8818	31.1304	35.6638	34.2412	47.6414	23.0827	23.0973	23.6685
ENSMUSG00000051855	2648.19	2664.76	2774.59	2588.89	2667.68	2746.26	2337.89	1780.21	1736.1	1917.75	1825.54	1655.19	1901.58	1691.73	0.5509	6.724e-36	6.4765e-34	Mest	chr6	+	30723547	30748455	2554	protein_coding	mesoderm_specific_transcript	2533	3085	3259	2570	2207	2878	2936	1938	1575	1960	1561	1728	1586	1694	49.3351	49.2769	51.3982	47.4973	49.1567	50.2589	43.9681	31.1408	29.6172	33.2722
ENSMUSG00000000682	25.0914	24.1859	22.1354	15.1103	14.5048	20.0387	18.3145	19.2902	6.61373	11.7413	4.67787	9.57865	13.1888	8.98795	0.5504	0.0018866	0.0091663	Cd52	chr4	-	134082448	134095082	514	protein_coding	CD52_antigen	24	28	26	15	12	21	23	21	6	12	4	10	11	9	2.32268	2.22231	2.03749	1.37748	1.32807	1.82221	1.71146	1.67669	0.560625	1.01219
ENSMUSG00000073902	8.36381	10.3654	5.10817	6.04411	3.62621	7.6338	9.55541	0.918581	2.20458	1.95689	4.67787	3.83146	0	2.99598	0.54958	0.0016287	0.0080788	Gm1966	chr7	-	106596743	106604035	7293	pseudogene	predicted_gene_1966	8	12	6	6	3	8	12	1	2	2	4	4	0	3	0.0545664	0.0671249	0.0331383	0.0388331	0.0234	0.0489246	0.0629328	0.00562718	0.0131707	0.0118897
ENSMUSG00000011254	352.325	406.841	380.558	371.713	348.116	427.493	328.865	293.946	240.299	229.934	216.351	253.834	252.984	266.643	0.54935	1.5989e-13	4.2318e-12	Thg1l	chr11	-	45946843	45955494	2250	protein_coding	tRNA-histidine_guanylyltransferase_1-like_(S._cerevisiae)	337	471	447	369	288	448	413	320	218	235	185	265	211	267	7.45056	8.53979	8.0022	7.74106	7.28134	8.88053	7.02052	5.83666	4.65327	4.52826
ENSMUSG00000028599	103.502	99.3348	114.082	73.5366	93.0726	108.782	107.498	82.6723	38.5801	66.5341	81.8627	27.7781	70.7397	66.9103	0.5493	0.00017526	0.001163	Tnfrsf1b	chr4	-	145213463	145246870	3818	protein_coding	tumor_necrosis_factor_receptor_superfamily_member_1b	99	115	134	73	77	114	135	90	35	68	70	29	59	67	1.28986	1.22877	1.41369	0.902492	1.14724	1.33172	1.35238	0.967394	0.440267	0.77218
ENSMUSG00000025887	19.864	20.7307	16.1759	4.02941	15.7136	9.54225	19.9071	3.67432	9.9206	7.82754	7.0168	3.83146	7.19387	9.98661	0.54913	0.0025463	0.011821	Casp12	chr9	+	5345430	5373032	2649	protein_coding	caspase_12	19	24	19	4	13	10	25	4	9	8	6	4	6	10	0.356791	0.369605	0.288906	0.0712746	0.279166	0.168369	0.360961	0.0619691	0.163172	0.130934
ENSMUSG00000039005	28.2278	27.641	40.014	26.1911	27.8009	33.3979	27.8699	11.023	14.3297	17.612	23.3893	19.1573	26.3775	14.9799	0.54901	0.00069444	0.0038747	Tlr4	chr4	+	66827584	66930284	4077	protein_coding	toll-like_receptor_4	27	32	47	26	23	35	35	12	13	18	20	20	22	15	0.329431	0.320198	0.464346	0.301016	0.320914	0.382887	0.328344	0.120792	0.153139	0.191416
ENSMUSG00000037762	53.3193	63.056	80.0279	57.419	70.1067	61.0704	68.4804	24.8017	31.9664	47.9437	63.1512	39.2725	34.7704	43.9411	0.54889	0.00010452	0.00074234	Slc16a9	chr10	+	70245100	70285968	3756	protein_coding	solute_carrier_family_16_(monocarboxylic_acid_transporters)_member_9	51	73	94	57	58	64	86	27	29	49	54	41	29	44	0.675439	0.792878	1.00806	0.716318	0.878423	0.759972	0.875739	0.295009	0.370815	0.565609
ENSMUSG00000040612	1336.12	1345.77	1208.93	1187.67	1150.72	1230	1439.68	819.374	815.693	988.227	838.508	771.082	899.233	901.791	0.54654	2.8799e-20	1.24e-18	Ildr2	chr1	+	166254139	166316823	8251	protein_coding	immunoglobulin-like_domain_containing_receptor_2	1278	1558	1420	1179	952	1289	1808	892	740	1010	717	805	750	903	7.70488	7.70317	6.93212	6.74472	6.56344	6.9677	8.38096	4.43665	4.30734	5.30714
ENSMUSG00000097354	70.0469	69.1024	51.933	69.5072	50.7669	56.2993	68.4804	15.6159	47.3984	53.8143	33.9145	13.4101	35.9693	53.9277	0.54523	0.0011296	0.0058944	2310001H17Rik	chr6	-	129208412	129237982	3336	lincRNA	RIKEN_cDNA_2310001H17_gene	67	80	61	69	42	59	86	17	43	55	29	14	30	54	0.999058	0.978302	0.736526	0.976292	0.716184	0.788804	0.985994	0.209132	0.619052	0.714796
ENSMUSG00000037447	287.506	302.323	311.598	270.978	345.698	300.581	247.644	201.169	189.594	224.063	188.284	206.899	207.423	166.776	0.54521	5.7346e-12	1.2879e-10	Arid5a	chr1	+	36307733	36324029	5504	protein_coding	AT_rich_interactive_domain_5A_(MRF1-like)	275	350	366	269	286	315	311	219	172	229	161	216	173	167	2.4854	2.59417	2.67847	2.30691	2.95589	2.55256	2.16115	1.63291	1.50084	1.80386
ENSMUSG00000021754	2788.28	2535.2	2611.98	2833.68	2444.06	2672.78	2601.46	1841.75	2147.26	1761.2	1707.42	1700.21	1648.59	1769.63	0.54434	6.8583e-26	4.1744e-24	Map3k1	chr13	-	111746428	111808993	6978	protein_coding	mitogen-activated_protein_kinase_kinase_kinase_1	2667	2935	3068	2813	2022	2801	3267	2005	1948	1800	1460	1775	1375	1772	19.0123	17.1588	17.7096	19.0281	16.4836	17.903	17.9069	11.7918	13.4073	11.1837
ENSMUSG00000059555	62.7286	79.4678	99.6092	87.6396	100.325	88.7429	85.2024	35.8247	30.8641	69.4694	76.0154	61.3034	59.9489	47.9357	0.54387	0.00011161	0.00078405	Tor4a	chr2	-	25192966	25196886	3255	protein_coding	torsin_family_4_member_A	60	92	117	87	83	93	107	39	28	71	65	64	50	48	0.916942	1.15304	1.44784	1.26161	1.45054	1.27431	1.25729	0.491712	0.413135	0.945699
ENSMUSG00000000031	16.7276	18.1394	64.7034	38.2793	39.8883	29.581	24.6848	10.1044	23.1481	19.5689	19.8809	9.57865	25.1785	14.9799	0.54382	0.0024177	0.011311	H19	chr7	-	142575529	142578143	2286	lincRNA	H19_imprinted_maternally_expressed_transcript	16	21	76	38	33	31	31	11	21	20	17	10	21	15	0.348165	0.374759	1.33913	0.784628	0.821181	0.604824	0.518666	0.197476	0.441192	0.379315
ENSMUSG00000007021	1270.25	1226.57	1482.22	1414.32	1564.1	1377.9	1215.13	878.163	803.568	1019.54	884.117	1023.96	975.968	878.822	0.5435	3.4656e-17	1.2312e-15	Syngr3	chr17	-	24685092	24689955	1965	protein_coding	synaptogyrin_3	1215	1420	1741	1404	1294	1444	1526	956	729	1042	756	1069	814	880	30.7578	29.4805	35.6879	33.7257	37.4605	32.7754	29.7026	19.9661	17.8176	22.9906
ENSMUSG00000042312	49.1374	63.9198	58.7439	63.4631	68.8979	83.9718	51.7585	31.2318	35.2732	36.2024	37.423	45.9775	37.1683	54.9264	0.54339	7.2865e-05	0.0005403	S100a13	chr3	+	90514435	90524581	715	protein_coding	S100_calcium_binding_protein_A13	47	74	69	63	57	88	65	34	32	37	32	48	31	55	3.26989	4.22216	3.88712	4.15902	4.53493	5.48934	3.47704	1.95151	2.14946	2.24358
ENSMUSG00000027718	13.5912	5.18268	3.40544	6.04411	7.25241	3.8169	4.7777	1.83716	0	0	3.5084	0	2.39796	1.99732	0.54172	0.00088998	0.0048134	Il21	chr3	-	37222759	37232618	3072	protein_coding	interleukin_21	13	6	4	6	6	4	6	2	0	0	3	0	2	2	0.210506	0.0796781	0.0524473	0.0921906	0.111104	0.0580741	0.074702	0.0267181	0	0
ENSMUSG00000029552	131.73	176.211	218.8	138.007	160.762	169.852	154.479	78.998	108.024	111.542	140.336	120.691	111.505	84.8862	0.54154	3.2414e-06	3.2115e-05	Tes	chr6	+	17065149	17105828	2685	protein_coding	testis_derived_transcript	126	204	257	137	133	178	194	86	98	114	120	126	93	85	2.33436	3.09952	3.85543	2.40842	2.81779	2.95678	2.7635	1.31447	1.75294	1.8408
ENSMUSG00000001521	773.652	674.613	694.711	816.962	761.503	692.767	680.823	452.86	462.961	538.143	470.126	496.174	563.52	476.361	0.54142	2.9203e-19	1.1837e-17	Tulp3	chr6	-	128321140	128355851	3395	protein_coding	tubby-like_protein_3	740	781	816	811	630	726	855	493	420	550	402	518	470	477	10.8426	9.38469	9.68133	11.2755	10.5561	9.53762	9.63226	5.95942	5.94147	7.02374
ENSMUSG00000023052	26.1369	34.5512	38.3112	42.3088	38.6795	48.6655	34.2402	19.2902	16.5343	25.4395	16.3725	22.9888	29.9744	29.9598	0.54077	0.00047515	0.002792	Npff	chr15	-	102523839	102524942	995	protein_coding	neuropeptide_FF-amide_peptide_precursor	25	40	45	42	32	51	43	21	15	26	14	24	25	30	1.24985	1.64001	1.82169	1.99243	1.82948	2.28607	1.6529	0.86615	0.724023	1.13291
ENSMUSG00000024907	13.5912	12.9567	28.9463	15.1103	25.3834	33.3979	13.5368	8.26723	8.81831	8.80598	14.0336	12.4523	13.1888	9.98661	0.54008	0.0025564	0.011853	Gal	chr19	-	3409919	3414472	712	protein_coding	galanin	13	15	34	15	21	35	17	9	8	9	12	13	11	10	0.908249	0.859449	1.92346	0.994416	1.6778	2.19246	0.913211	0.518752	0.539628	0.548035
ENSMUSG00000051984	47.0464	31.0961	34.0544	36.2646	27.8009	32.4437	39.0179	21.1274	23.1481	19.5689	12.8641	22.0309	35.9693	15.9786	0.54004	0.0006645	0.003731	Sec31b	chr19	-	44516957	44545864	3939	protein_coding	Sec31_homolog_B_(S._cerevisiae)	45	36	40	36	23	34	49	23	21	20	11	23	30	16	0.568288	0.372842	0.409033	0.431393	0.332157	0.384978	0.475787	0.239629	0.256046	0.220135
ENSMUSG00000021010	101.411	88.1056	82.582	111.816	89.4464	104.011	121.831	54.1963	66.1373	70.4479	46.7787	74.7135	82.7295	62.9156	0.53933	5.3738e-06	5.1076e-05	Npas3	chr12	+	53248677	54072175	5879	protein_coding	neuronal_PAS_domain_protein_3	97	102	97	111	74	109	153	59	60	72	40	78	69	63	0.820748	0.707792	0.664588	0.891202	0.716027	0.826925	0.995383	0.411856	0.490154	0.530976
ENSMUSG00000056116	181.913	167.573	197.516	179.309	192.189	164.127	163.238	98.2882	110.229	141.874	102.913	139.848	122.296	116.843	0.53842	4.0886e-09	6.4418e-08	H2-T22	chr17	-	36037128	36042747	3062	protein_coding	histocompatibility_2_T_region_locus_22	174	194	232	178	159	172	205	107	100	145	88	146	102	117	2.82674	2.58467	3.05188	2.74392	2.95388	2.50534	2.56065	1.43409	1.56848	2.05309
ENSMUSG00000031374	85.729	60.4646	60.4466	67.4925	71.3154	53.4366	81.221	43.1733	39.6824	46.9652	32.7451	47.8933	52.755	45.9384	0.53786	3.006e-05	0.00024359	Zfp92	chrX	+	73411096	73428385	5767	protein_coding	zinc_finger_protein_92	82	70	71	67	59	56	102	47	36	48	28	50	44	46	0.707303	0.495173	0.495899	0.54838	0.581974	0.433093	0.676476	0.334461	0.299804	0.360859
ENSMUSG00000032089	43.91	36.2788	35.7572	31.2279	45.932	28.6268	38.2216	32.1503	26.4549	23.4826	12.8641	25.8624	22.7806	11.9839	0.53743	0.00074031	0.0040976	Il10ra	chr9	-	45253837	45269149	3498	protein_coding	interleukin_10_receptor_alpha	42	42	42	31	38	30	48	35	24	24	11	27	19	12	0.597271	0.489822	0.483631	0.41831	0.617967	0.382512	0.524836	0.410625	0.329516	0.297466
ENSMUSG00000034616	439.1	423.252	470.803	425.102	354.16	363.56	397.346	231.482	287.697	270.05	277.164	325.674	311.734	242.675	0.53728	1.2901e-11	2.7901e-10	Ssh3	chr19	-	4261668	4269172	2735	protein_coding	slingshot_homolog_3_(Drosophila)	420	490	553	422	293	381	499	252	261	276	237	340	260	243	7.63895	7.30883	8.14427	7.28302	6.09413	6.21314	6.97823	3.78129	4.58319	4.3752
ENSMUSG00000026029	27.1824	53.5544	42.5681	37.272	38.6795	36.2606	27.8699	22.9645	18.7389	27.3964	24.5588	20.1152	26.3775	21.9705	0.53715	0.00051422	0.0029906	Casp8	chr1	+	58795374	58847503	2585	protein_coding	caspase_8	26	62	50	37	32	38	35	25	17	28	21	21	22	22	0.500328	0.978453	0.779101	0.675613	0.704192	0.655641	0.517857	0.396896	0.315844	0.469616
ENSMUSG00000027555	6.27286	7.77402	6.81089	14.1029	7.25241	7.6338	6.37027	5.51149	1.10229	4.89221	3.5084	1.91573	2.39796	0.998661	0.53664	0.0024737	0.011536	Car13	chr3	+	14641727	14663002	2299	protein_coding	carbonic_anhydrase_13	6	9	8	14	6	8	8	6	1	5	3	2	2	1	0.129824	0.159703	0.140164	0.287439	0.148461	0.155201	0.133092	0.107105	0.0208903	0.0942924
ENSMUSG00000074170	52.2738	48.3717	63.0007	40.2941	65.2717	57.2535	49.3696	38.5804	13.2275	14.6766	46.7787	25.8624	32.3724	49.9331	0.53644	0.0012335	0.0063549	Plekhf1	chr7	-	38220654	38227994	1559	protein_coding	pleckstrin_homology_domain_containing_family_F_(with_FYVE_domain)_member_1	50	56	74	40	54	60	62	42	12	15	40	27	27	50	1.59539	1.46538	1.91192	1.21107	1.97038	1.71652	1.52106	1.10561	0.369675	0.417149
ENSMUSG00000022488	86.7745	101.062	95.3524	74.544	95.4901	91.6056	87.5912	55.1149	42.9892	62.6203	74.8459	46.9354	79.1325	54.9264	0.53608	7.8465e-06	7.2298e-05	Nckap1l	chr15	+	103453825	103498800	4717	protein_coding	NCK_associated_protein_1_like	83	117	112	74	79	96	110	60	39	64	64	49	66	55	0.875294	1.01188	0.956394	0.740496	0.952714	0.907713	0.891926	0.522014	0.397085	0.588247
ENSMUSG00000039756	2194.45	2327.89	1917.27	1979.45	2110.45	2119.33	1953.28	1472.49	1438.49	1414.83	1412.72	1460.74	1433.98	1379.15	0.53592	7.8144e-35	7.3748e-33	Dnttip2	chr3	+	122274414	122285269	2401	protein_coding	deoxynucleotidyltransferase_terminal_interacting_protein_2	2099	2695	2252	1965	1746	2221	2453	1603	1305	1446	1208	1525	1196	1381	43.4873	45.7905	37.7799	38.6302	41.3669	41.2572	39.0758	27.3992	26.1037	26.1109
ENSMUSG00000023905	119.184	102.79	213.692	172.257	193.398	188.937	122.628	61.5449	44.0915	124.262	98.2352	107.281	124.694	86.8835	0.5359	0.0015112	0.0075665	Tnfrsf12a	chr17	-	23675447	23677449	963	protein_coding	tumor_necrosis_factor_receptor_superfamily_member_12a	114	119	251	171	160	198	154	67	40	127	84	112	104	87	5.88871	5.04115	10.4986	8.38159	9.45138	9.17027	6.11641	2.85526	1.99489	5.71772
ENSMUSG00000062312	152.639	145.115	187.299	185.353	178.893	152.676	159.257	110.23	108.024	106.65	119.286	106.323	123.495	107.855	0.53588	1.4485e-09	2.4319e-08	Erbb2	chr11	+	98412470	98437716	5012	protein_coding	v-erb-b2_erythroblastic_leukemia_viral_oncogene_homolog_2_neuro/glioblastoma_derived_oncogene_homolog_(avian)	146	168	220	184	148	160	200	120	98	109	102	111	103	108	1.44905	1.36744	1.76806	1.73286	1.67978	1.42381	1.52623	0.982578	0.939073	0.94289
ENSMUSG00000034041	21.955	12.9567	21.284	22.1617	19.3398	30.5352	22.296	17.453	5.51144	2.93533	16.3725	13.4101	14.3877	9.98661	0.53565	0.0027542	0.01262	Lyl1	chr8	+	84701457	84704715	1800	protein_coding	lymphoblastomic_leukemia_1	21	15	25	22	16	32	28	19	5	3	14	14	12	10	0.580348	0.33996	0.559438	0.576908	0.505649	0.792904	0.59496	0.43319	0.133408	0.0722594
ENSMUSG00000037686	6.27286	9.50158	6.81089	7.05146	3.62621	10.4965	3.98142	2.75574	1.10229	0.978443	2.33893	2.8736	4.79591	0	0.53565	0.0018086	0.0088355	Aspg	chr12	+	112106683	112127573	2732	protein_coding	asparaginase_homolog_(S._cerevisiae)	6	11	8	7	3	11	5	3	1	1	2	3	4	0	0.109248	0.164256	0.117949	0.120941	0.0624657	0.179579	0.0699989	0.0450648	0.0175794	0.0158696
ENSMUSG00000050022	19.864	33.6874	38.3112	29.2132	29.0097	39.1232	35.0365	21.1274	17.6366	18.5904	17.542	23.9466	21.5816	16.9772	0.53543	0.00066552	0.0037345	Amz1	chr5	+	140724127	140761439	4037	protein_coding	archaelysin_family_metallopeptidase_1	19	39	45	29	24	41	44	23	16	19	15	25	18	17	0.234119	0.394108	0.448992	0.339075	0.338185	0.452969	0.416866	0.233812	0.190347	0.204052
ENSMUSG00000027335	133.821	131.295	194.962	168.228	194.606	166.035	193.497	83.5909	133.377	126.219	126.302	94.8287	113.903	105.858	0.53522	1.4361e-06	1.5191e-05	Adra1d	chr2	-	131545850	131562283	1899	protein_coding	adrenergic_receptor_alpha_1d	128	152	229	167	161	174	243	91	121	129	108	99	95	106	3.35295	3.26533	4.8573	4.15096	4.82283	4.08665	4.89422	1.96659	3.06017	2.94517
ENSMUSG00000070327	1117.61	1048.63	1068.46	1029.51	1090.28	1021.98	1214.33	736.702	727.51	687.845	757.815	819.933	734.973	739.009	0.53518	5.2801e-28	3.5618e-26	Rnf213	chr11	+	119393100	119487418	16716	protein_coding	ring_finger_protein_213	1069	1214	1255	1022	902	1071	1525	802	660	703	648	856	613	740	3.18117	2.96275	3.0241	2.88586	3.06956	2.85759	3.48931	1.96897	1.89625	1.82334
ENSMUSG00000039063	38.6826	32.8237	22.9867	44.3235	25.3834	31.4894	25.4811	18.3716	24.2503	22.5042	11.6947	22.0309	17.9847	14.9799	0.53169	0.0010815	0.0056734	Echdc3	chr2	-	6188465	6213033	1851	protein_coding	enoyl_Coenzyme_A_hydratase_domain_containing_3	37	38	27	44	21	33	32	20	22	23	10	23	15	15	0.994345	0.837502	0.587546	1.12203	0.645378	0.795153	0.661219	0.443425	0.570822	0.538725
ENSMUSG00000015401	69.0014	98.471	126.853	95.6984	114.83	133.592	78.8321	34.9061	25.3526	78.2754	105.252	39.2725	67.1428	35.9518	0.53135	0.0029442	0.013373	Tmem27	chrX	+	164088830	164118860	1389	protein_coding	transmembrane_protein_27	66	114	149	95	95	140	99	38	23	80	90	41	56	36	2.36365	3.3482	4.32084	3.22833	3.89065	4.49541	2.72606	1.12274	0.795262	2.49709
ENSMUSG00000046694	37.6371	43.189	40.014	29.2132	39.8883	35.3063	31.8514	20.2088	16.5343	18.5904	38.5924	17.2416	26.3775	21.9705	0.53116	0.00066689	0.0037388	Fam46b	chr4	+	133480132	133487938	2287	protein_coding	family_with_sequence_similarity_46_member_B	36	50	47	29	33	37	40	22	15	19	33	18	22	22	0.783029	0.891893	0.827782	0.598533	0.820822	0.721571	0.668953	0.394779	0.314999	0.360191
ENSMUSG00000022468	52.2738	42.3252	48.5276	53.3896	50.7669	54.3908	53.351	36.7432	26.4549	37.1808	25.7283	42.1461	34.7704	22.9692	0.53017	0.00012096	0.00083681	Endou	chr15	-	97711019	97731405	2405	protein_coding	endonuclease_polyU-specific	50	49	57	53	42	57	67	40	24	38	22	44	29	23	1.03418	0.83117	0.95465	1.0402	0.993426	1.05707	1.06552	0.682562	0.47927	0.685037
ENSMUSG00000000567	598.012	621.058	649.589	615.492	738.537	608.796	703.915	443.675	364.857	452.04	425.686	451.155	464.004	498.332	0.52972	2.0866e-16	6.901e-15	Sox9	chr11	+	112782224	112787760	4135	protein_coding	SRY_(sex_determining_region_Y)-box_9	572	719	763	611	611	638	884	483	331	462	364	471	387	499	6.88117	7.09353	7.43248	6.97465	8.40557	6.88159	8.17671	4.79368	3.84447	4.84409
ENSMUSG00000024349	19.864	38.8701	28.9463	21.1544	48.3494	17.1761	18.3145	15.6159	13.2275	16.6335	11.6947	10.5365	19.1836	19.9732	0.52972	0.0025208	0.01172	Tmem173	chr18	-	35733678	35740554	2302	protein_coding	transmembrane_protein_173	19	45	34	21	40	18	23	17	12	17	10	11	16	20	0.410573	0.797473	0.594919	0.430597	0.988453	0.348747	0.382142	0.303068	0.250357	0.320176
ENSMUSG00000034258	72.1378	83.7867	94.5011	87.6396	70.1067	87.7887	102.721	40.4176	44.0915	62.6203	92.3879	50.7669	46.7601	51.9304	0.52885	9.3058e-05	0.00067009	Mfsd7c	chr12	+	85746539	85813585	3435	protein_coding	major_facilitator_superfamily_domain_containing_7C	69	97	111	87	58	92	129	44	40	64	79	53	39	52	0.999227	1.152	1.30161	1.1955	0.960512	1.19455	1.43637	0.525682	0.559265	0.807791
ENSMUSG00000074277	28.2278	25.0496	21.284	21.1544	24.1747	25.7641	29.4625	19.2902	16.5343	8.80598	8.18627	13.4101	19.1836	17.9759	0.52866	0.0015554	0.0077607	Phldb3	chr7	+	24611328	24629288	2273	protein_coding	pleckstrin_homology-like_domain_family_B_member_3	27	29	25	21	20	27	37	21	15	9	7	14	16	18	0.590889	0.520484	0.443022	0.43609	0.500532	0.529795	0.622593	0.379155	0.316939	0.171668
ENSMUSG00000030117	27.1824	22.4583	17.0272	15.1103	31.4271	15.2676	17.5182	10.1044	14.3297	7.82754	16.3725	12.4523	4.79591	13.9813	0.52755	0.0028101	0.012832	Gdf3	chr6	-	122605403	122610087	2125	protein_coding	growth_differentiation_factor_3	26	26	20	15	26	16	22	11	13	8	14	13	4	14	0.608634	0.499141	0.379102	0.333188	0.69601	0.335818	0.395973	0.212437	0.293812	0.163221
ENSMUSG00000029851	80.5016	76.8765	102.163	81.5955	87.029	100.194	94.7578	48.6848	68.3419	49.9006	49.1176	70.882	70.7397	55.925	0.5273	6.9151e-06	6.4511e-05	Fam115c	chr6	-	42623019	42645254	4494	protein_coding	family_with_sequence_similarity_115_member_C	77	89	120	81	72	105	119	53	62	51	42	74	59	56	0.852314	0.807915	1.07556	0.850763	0.911383	1.04208	1.01278	0.483994	0.662587	0.49202
ENSMUSG00000000126	63.774	61.3284	88.5416	64.4705	78.5678	70.6127	75.647	46.8476	37.4778	52.8359	43.2703	40.2303	58.7499	50.9317	0.5272	2.2004e-05	0.00018339	Wnt9a	chr11	+	59306928	59333552	3320	protein_coding	wingless-type_MMTV_integration_site_family_member_9A	61	71	104	64	65	74	95	51	34	54	37	42	49	51	0.913973	0.872427	1.26177	0.90991	1.11372	0.994116	1.09443	0.630419	0.491842	0.705182
ENSMUSG00000035678	57.5012	63.056	77.4739	70.5146	71.3154	60.1162	59.7213	35.8247	38.5801	48.9221	49.1176	49.809	40.7652	37.9491	0.52718	2.4262e-05	0.00020033	Tnfsf9	chr17	+	57105385	57107757	1230	protein_coding	tumor_necrosis_factor_(ligand)_superfamily_member_9	55	73	91	70	59	63	75	39	35	50	42	52	34	38	2.22433	2.42118	2.98003	2.68627	2.72865	2.28443	2.33216	1.30124	1.36662	1.76242
ENSMUSG00000024827	1371.66	1294.81	1169.77	1137.3	1350.16	1232.86	1191.24	887.349	530.201	934.413	1107.49	647.517	890.841	789.941	0.52678	6.2411e-06	5.8692e-05	Gldc	chr19	-	30098449	30175418	3754	protein_coding	glycine_decarboxylase	1312	1499	1374	1129	1117	1292	1496	966	481	955	947	676	743	791	17.3853	16.2898	14.7427	14.1957	16.9262	15.3501	15.2419	10.5604	6.15369	11.0295
ENSMUSG00000024087	399.372	515.677	407.802	430.139	441.189	459.937	546.251	227.808	308.641	309.188	425.686	318.011	266.173	304.592	0.52641	6.0093e-08	8.015e-07	Cyp1b1	chr17	-	79706953	79715041	5128	protein_coding	cytochrome_P450_family_1_subfamily_b_polypeptide_1	382	597	479	427	365	482	686	248	280	316	364	332	222	305	3.70559	4.74936	3.76246	3.9304	4.04899	4.1922	5.11656	1.98473	2.62237	2.67168
ENSMUSG00000001604	69.0014	45.7804	74.9198	51.3749	68.8979	66.7958	62.9064	55.1149	34.1709	37.1808	47.9482	28.736	27.5765	48.9344	0.52372	0.00023108	0.0014717	Tcea3	chr4	+	136247729	136274898	1251	protein_coding	transcription_elongation_factor_A_(SII)_3	66	53	88	51	57	70	79	60	31	38	41	30	23	49	2.62439	1.72833	2.83341	1.92429	2.5919	2.49565	2.4153	1.9683	1.19011	1.31696
ENSMUSG00000015950	66.9105	52.6906	61.298	48.3529	37.4708	49.6197	48.5733	22.0459	30.8641	45.0084	50.2871	23.9466	28.7755	29.9598	0.52365	0.00051056	0.0029748	Ncf1	chr5	-	134220053	134229625	2882	protein_coding	neutrophil_cytosolic_factor_1	64	61	72	48	31	52	61	24	28	46	43	25	24	30	1.10466	0.863465	1.00629	0.786147	0.611884	0.804735	0.809539	0.341755	0.466604	0.692006
ENSMUSG00000002699	20.9095	19.867	28.0949	21.1544	15.7136	22.9014	11.9443	10.1044	12.1252	7.82754	12.8641	10.5365	13.1888	13.9813	0.5212	0.0027604	0.012639	Lcp2	chr11	+	34046920	34092295	3647	protein_coding	lymphocyte_cytosolic_protein_2	20	23	33	21	13	24	15	11	11	8	11	11	11	14	0.272795	0.257277	0.364471	0.271794	0.202772	0.293507	0.15731	0.123781	0.144858	0.0951043
ENSMUSG00000022656	2151.59	1931.41	1721.45	1693.36	1772.01	1932.31	1812.34	1249.27	1058.2	1211.31	1477.04	978.938	1570.66	1351.19	0.52071	1.4594e-10	2.7714e-09	Pvrl3	chr16	-	46387706	46498525	9116	protein_coding	poliovirus_receptor-related_3	2058	2236	2022	1681	1466	2025	2276	1360	960	1238	1263	1022	1310	1353	11.2301	10.0064	8.93432	8.70402	9.1481	9.9075	9.54927	6.12254	5.05768	5.88792
ENSMUSG00000087512	20.9095	31.0961	28.0949	41.3014	26.5922	17.1761	30.2588	14.6973	15.432	17.612	18.7115	22.9888	11.9898	14.9799	0.52044	0.0017985	0.0087951	Gm11985	chr11	-	7183153	7186290	720	antisense	predicted_gene_11985	20	36	33	41	22	18	38	16	14	18	16	24	10	15	1.38178	2.03976	1.84615	2.68787	1.73817	1.11502	2.01861	0.911978	0.933856	1.08389
ENSMUSG00000024818	31.3643	18.1394	36.6085	30.2205	38.6795	36.2606	40.6105	20.2088	15.432	18.5904	21.0504	18.1994	23.9796	24.9665	0.51971	0.0011248	0.0058727	Slc25a45	chr19	+	5877808	5885766	2599	protein_coding	solute_carrier_family_25_member_45	30	21	43	30	32	38	51	22	14	19	18	19	20	25	0.574191	0.329626	0.666418	0.544843	0.700398	0.65211	0.750526	0.347387	0.258706	0.316952
ENSMUSG00000042333	10.4548	6.04646	5.10817	8.05881	12.0874	7.6338	7.16656	5.51149	2.20458	2.93533	4.67787	0.957865	1.19898	3.99464	0.51944	0.0035248	0.015516	Tnfrsf14	chr4	-	154922210	154928563	1018	protein_coding	tumor_necrosis_factor_receptor_superfamily_member_14_(herpesvirus_entry_mediator)	10	7	6	8	10	8	9	6	2	3	4	1	1	4	0.488646	0.280517	0.237404	0.370936	0.558796	0.350498	0.33814	0.24188	0.0943554	0.127767
ENSMUSG00000009551	18.8186	14.6843	11.0677	11.0809	6.04368	10.4965	10.3517	4.5929	11.0229	5.87066	4.67787	2.8736	4.79591	5.99197	0.51921	0.004324	0.018417	6330409D20Rik	chr2	-	32732620	32741016	1119	protein_coding	RIKEN_cDNA_6330409D20_gene	18	17	13	11	5	11	13	5	10	6	4	3	4	6	0.800174	0.619766	0.467948	0.464001	0.25418	0.438436	0.44434	0.183374	0.429195	0.23247
ENSMUSG00000040367	13.5912	13.8205	13.6218	18.1323	15.7136	17.1761	8.75912	6.43007	7.71602	7.82754	10.5252	4.78933	9.59182	6.99063	0.5187	0.0039242	0.016931	Lrrd1	chr5	+	3845173	3866596	2951	protein_coding	leucine_rich_repeats_and_death_domain_containing_1	13	16	16	18	13	18	11	7	7	8	9	5	8	7	0.219137	0.221187	0.218391	0.287912	0.250597	0.272049	0.142569	0.0973477	0.113923	0.117535
ENSMUSG00000055447	3607.94	3766.95	3850.71	3874.27	3504.12	3807.36	3542.67	2425.05	2578.25	2689.74	2749.42	2435.85	2541.83	2643.46	0.51817	1.457e-44	1.9729e-42	Cd47	chr16	+	49855618	49915010	5277	protein_coding	CD47_antigen_(Rh-related_antigen_integrin-associated_signal_transducer)	3451	4361	4523	3846	2899	3990	4449	2640	2339	2749	2351	2543	2120	2647	32.5312	33.7138	34.5242	34.4016	31.2509	33.7232	32.2461	20.5312	21.2876	22.5857
ENSMUSG00000061758	124.412	96.7434	139.623	116.853	102.743	117.37	85.9987	90.9395	47.3984	87.0814	73.6764	51.7247	76.7346	85.8849	0.51811	5.4571e-05	0.00041758	Akr1b10	chr6	+	34384218	34396950	1371	protein_coding	aldo-keto_reductase_family_1_member_B10_(aldose_reductase)	119	112	164	116	85	123	108	99	43	89	63	54	64	86	4.31769	3.33265	4.81827	3.99372	3.52682	4.00139	3.01293	2.96343	1.50631	2.81448
ENSMUSG00000010358	56.4557	58.7371	63.0007	67.4925	70.1067	68.7042	75.647	50.522	29.7618	52.8359	44.4398	41.1882	52.755	29.9598	0.51666	8.1133e-05	0.00059337	Ifi35	chr11	+	101448407	101458698	1362	protein_coding	interferon-induced_protein_35	54	68	74	67	58	72	95	55	27	54	38	43	44	30	1.97223	2.03676	2.18846	2.32196	2.42244	2.35776	2.66777	1.65723	0.952075	1.71895
ENSMUSG00000038235	210.141	185.713	229.867	168.228	197.024	229.968	193.497	124.008	98.1037	136.982	161.386	94.8287	159.464	174.766	0.51642	4.4486e-06	4.296e-05	F11r	chr1	+	171437535	171464603	2518	protein_coding	F11_receptor	201	215	270	167	163	241	243	135	89	140	138	99	133	175	3.97084	3.48331	4.31909	3.13053	3.68242	4.26879	3.69107	2.20027	1.69754	2.41056
ENSMUSG00000025779	16.7276	24.1859	23.8381	10.0735	19.3398	20.993	17.5182	4.5929	16.5343	10.7629	11.6947	6.70506	9.59182	13.9813	0.51614	0.003773	0.0164	Ly96	chr1	+	16688051	16709611	666	protein_coding	lymphocyte_antigen_96	16	28	28	10	16	22	22	5	15	11	10	7	8	14	1.19505	1.71511	1.69343	0.708733	1.36662	1.4733	1.26343	0.308101	1.08169	0.716084
ENSMUSG00000038058	84.6835	96.7434	97.9065	86.6322	111.204	103.056	125.017	51.4405	61.7282	78.2754	66.6596	68.0084	86.3264	60.9183	0.516	8.7922e-06	8.0259e-05	Nod1	chr6	-	54923942	54972612	4322	protein_coding	nucleotide-binding_oligomerization_domain_containing_1	81	112	115	86	92	108	157	56	56	80	57	71	72	61	0.932271	1.05716	1.07176	0.939226	1.21089	1.11451	1.38937	0.531741	0.622283	0.802511
ENSMUSG00000038776	350.234	334.283	309.895	249.823	269.548	307.261	351.161	244.343	185.184	163.4	246.758	134.101	280.561	202.728	0.51559	7.0587e-06	6.572e-05	Ephx1	chr1	-	180976155	181020904	1741	protein_coding	epoxide_hydrolase_1_microsomal	335	387	364	248	223	322	441	266	168	167	211	140	234	203	9.57167	9.0682	8.42146	6.72372	7.28631	8.24898	9.68817	6.27018	4.63442	4.15876
ENSMUSG00000031165	13.5912	10.3654	8.51361	9.06616	8.46115	10.4965	6.37027	0.918581	1.10229	2.93533	8.18627	3.83146	5.99489	5.99197	0.51553	0.004232	0.018059	Was	chrX	-	8081453	8090498	2114	protein_coding	Wiskott-Aldrich_syndrome_homolog_(human)	13	12	10	9	7	11	8	1	1	3	7	4	5	6	0.3059	0.231572	0.190537	0.200953	0.188362	0.232076	0.144739	0.019413	0.0227185	0.0615265
ENSMUSG00000041736	122.321	143.388	122.596	125.919	163.179	147.905	114.665	82.6723	60.6259	95.8874	79.5238	66.0927	142.678	92.8755	0.51495	5.3945e-05	0.00041335	Tspo	chr15	+	83563573	83574201	854	protein_coding	translocator_protein	117	166	144	125	135	155	144	90	55	98	68	69	119	93	6.81506	7.92974	6.79187	6.9089	8.99243	8.09501	6.44921	4.32496	3.09307	4.97524
ENSMUSG00000023206	18.8186	21.5945	32.3517	31.2279	19.3398	32.4437	34.2402	15.6159	18.7389	4.89221	23.3893	21.073	14.3877	12.9826	0.51482	0.0029641	0.013437	Il15ra	chr2	+	11705287	11733986	2315	protein_coding	interleukin_15_receptor_alpha_chain	18	25	38	31	16	34	43	17	17	5	20	22	12	13	0.386779	0.440553	0.661176	0.632073	0.393161	0.655045	0.710427	0.301366	0.352681	0.0936407
ENSMUSG00000090223	15.6821	12.0929	11.9191	16.1176	41.097	24.8099	19.1108	10.1044	6.61373	7.82754	5.84734	13.4101	17.9847	9.98661	0.51424	0.0045524	0.019185	Pcp4	chr16	+	96467606	96525793	641	protein_coding	Purkinje_cell_protein_4	15	14	14	16	34	26	24	11	6	8	5	14	15	10	1.16406	0.891002	0.87974	1.1782	3.01733	1.80908	1.43204	0.704258	0.44955	0.5411
ENSMUSG00000097067	11.5002	2.59134	4.25681	16.1176	2.41747	2.86268	8.75912	0	1.10229	0	2.33893	1.91573	3.59693	0	0.51393	0.00093754	0.0050298	Gm26743	chr2	-	67677031	67687282	1726	lincRNA	predicted_gene_26743	11	3	5	16	2	3	11	0	1	0	2	2	3	0	0.317025	0.070907	0.116685	0.437558	0.065916	0.0775218	0.243755	0	0.0278255	0
ENSMUSG00000087042	49.1374	38.0063	44.2708	42.3088	31.4271	38.169	58.1287	35.8247	23.1481	29.3533	29.2367	26.8202	27.5765	20.9719	0.51378	0.00050934	0.0029687	Gm11611	chr11	-	97519612	97521895	1326	sense_intronic	predicted_gene_11611	47	44	52	42	26	40	73	39	21	30	25	28	23	21	1.76318	1.35369	1.57959	1.49507	1.1154	1.34543	2.10563	1.20703	0.760607	0.980897
ENSMUSG00000078945	3.13643	18.1394	19.5813	14.1029	10.8786	8.58803	10.3517	5.51149	4.40915	0.978443	10.5252	5.74719	3.59693	5.99197	0.51324	0.0043721	0.018584	Naip2	chr13	-	100144063	100202092	4823	protein_coding	NLR_family_apoptosis_inhibitory_protein_2	3	21	23	14	9	9	13	6	4	1	9	6	3	6	0.0309418	0.177628	0.192086	0.137015	0.106152	0.0832278	0.103093	0.0510541	0.0398315	0.00898935
ENSMUSG00000001517	40.7736	41.4615	34.0544	29.2132	30.2184	23.8556	38.2216	20.2088	36.3755	23.4826	14.0336	14.368	21.5816	15.9786	0.51233	0.001699	0.0083796	Foxm1	chr6	+	128362967	128375893	4399	protein_coding	forkhead_box_M1	39	48	40	29	25	25	48	22	33	24	12	15	18	16	0.441014	0.44514	0.366261	0.311172	0.323286	0.253472	0.417339	0.205242	0.360284	0.236539
ENSMUSG00000036570	484.055	445.711	499.749	404.955	458.111	437.989	405.309	328.852	255.731	313.102	270.147	332.379	352.499	311.582	0.51142	9.986e-13	2.4265e-11	Fxyd1	chr7	-	31051681	31055656	620	protein_coding	FXYD_domain-containing_ion_transport_regulator_1	463	516	587	402	379	459	509	358	232	320	231	347	294	312	37.1476	33.9521	38.1356	30.6049	34.7735	33.019	31.3999	23.6967	17.9714	22.3771
ENSMUSG00000006219	61.6831	44.9166	57.0412	43.3161	33.8446	47.7113	77.2395	34.9061	25.3526	41.0946	28.0672	21.073	43.1632	37.9491	0.51123	0.00094301	0.0050548	Fblim1	chr4	-	141576062	141606096	3101	protein_coding	filamin_binding_LIM_protein_1	59	52	67	43	28	50	97	38	23	42	24	22	36	38	0.946438	0.684086	0.870277	0.654521	0.513639	0.719137	1.19639	0.502897	0.356214	0.58721
ENSMUSG00000029312	1151.07	1269.76	1290.66	1182.63	1241.37	1309.2	1121.17	781.712	874.115	864.943	906.337	855.374	804.514	887.81	0.51119	3.7106e-27	2.4075e-25	Klhl8	chr5	-	103861973	103911259	3193	protein_coding	kelch-like_8	1101	1470	1516	1174	1027	1372	1408	851	793	884	775	893	671	889	17.1526	18.7814	19.1243	17.355	18.2967	19.1645	16.8658	10.9377	11.9278	12.0033
ENSMUSG00000025184	981.702	954.477	1015.67	969.072	948.857	1050.6	973.059	656.785	685.623	714.263	740.273	683.916	683.417	655.122	0.5111	1.4983e-33	1.3396e-31	R3hcc1l	chr19	+	42518759	42592343	4112	protein_coding	R3H_domain_and_coiled-coil_containing_1_like	939	1105	1193	962	785	1101	1222	715	622	730	633	714	570	656	11.3594	10.9627	11.6862	11.0428	10.8597	11.942	11.3663	7.13592	7.26477	7.69689
ENSMUSG00000021555	1967.59	1783.71	1735.07	1867.63	1763.55	1738.6	1828.27	1331.02	1266.53	1266.1	1341.38	1250.01	1239.74	1165.44	0.51106	4.4808e-37	4.5015e-35	Naa35	chr13	+	59585259	59634798	3082	protein_coding	N(alpha)-acetyltransferase_35_NatC_auxiliary_subunit	1882	2065	2038	1854	1459	1822	2296	1449	1149	1294	1147	1305	1034	1167	30.3759	27.3336	26.6352	28.3945	26.9292	26.3669	28.4932	19.2945	17.9049	18.2032
ENSMUSG00000054520	80.5016	80.3316	97.9065	95.6984	80.9853	82.0634	72.4618	33.9875	38.5801	65.5556	71.3375	56.5141	65.9438	58.921	0.51067	8.1253e-05	0.00059401	Sh3bp2	chr5	+	34525838	34563638	3034	protein_coding	SH3-domain_binding_protein_2	77	93	115	95	67	86	91	37	35	67	61	59	55	59	1.26246	1.25048	1.52675	1.47797	1.25621	1.26423	1.14717	0.500476	0.554035	0.957425
ENSMUSG00000032725	25.0914	16.4118	17.0272	19.1397	27.8009	16.2218	28.6662	16.5345	6.61373	14.6766	8.18627	12.4523	14.3877	12.9826	0.51001	0.0033464	0.014854	Folr2	chr7	-	101839990	101845331	1079	protein_coding	folate_receptor_2_(fetal)	24	19	20	19	23	17	36	18	6	15	7	13	12	13	1.10645	0.718358	0.746609	0.831168	1.21257	0.702701	1.2761	0.684618	0.267063	0.60272
ENSMUSG00000025555	891.791	818.864	751.752	899.565	774.8	773.877	926.875	564.927	599.645	559.669	526.26	617.823	653.443	538.278	0.50996	4.7687e-17	1.6781e-15	Farp1	chr14	+	121035200	121283744	4885	protein_coding	FERM_RhoGEF_(Arhgef)_and_pleckstrin_domain_protein_1_(chondrocyte-derived)	853	948	883	893	641	811	1164	615	544	572	450	645	545	539	8.68613	7.91685	7.28083	8.62866	7.4644	7.40457	9.11361	5.16663	5.34834	5.07665
ENSMUSG00000038507	387.872	332.555	372.896	313.286	315.48	289.13	375.05	224.134	221.56	272.985	250.266	215.52	238.597	227.695	0.50942	3.4518e-11	7.0957e-10	Parp12	chr6	-	39086410	39118349	3231	protein_coding	poly_(ADP-ribose)_polymerase_family_member_12	371	385	438	311	261	303	471	244	201	279	214	225	199	228	5.71188	4.86108	5.46037	4.54339	4.59521	4.18263	5.57553	3.0992	2.98775	3.7438
ENSMUSG00000025921	1776.26	1712.01	1809.99	1609.75	1672.89	1704.25	1693.7	1236.41	1146.38	1185.87	1253.67	1080.47	1173.8	1302.25	0.50896	6.2244e-33	5.3599e-31	Rdh10	chr1	+	16105774	16133734	3587	protein_coding	retinol_dehydrogenase_10_(all-trans)	1699	1982	2126	1598	1384	1786	2127	1346	1040	1212	1072	1128	979	1304	23.5615	22.5414	23.8735	21.0282	21.9486	22.2072	22.6797	15.3996	13.9247	14.6493
ENSMUSG00000041801	225.823	231.493	233.273	236.728	206.694	198.479	180.756	154.322	144.4	157.529	123.964	138.89	183.444	136.817	0.50882	6.1468e-09	9.3916e-08	Phlda3	chr1	+	135766119	135769136	1435	protein_coding	pleckstrin_homology-like_domain_family_A_member_3	216	268	274	235	171	208	227	168	131	161	106	145	153	137	7.48762	7.61889	7.69101	7.72988	6.77869	6.4648	6.05029	4.80457	4.38434	4.86429
ENSMUSG00000068758	82.5926	94.1521	83.4334	100.735	72.5241	94.4683	76.4433	63.3821	58.4213	70.4479	59.6428	43.1039	55.153	55.925	0.50863	1.1477e-05	0.00010217	Il3ra	chr14	+	14346495	14355490	1394	protein_coding	interleukin_3_receptor_alpha_chain	79	109	98	100	60	99	96	69	53	72	51	45	46	56	2.81907	3.18987	2.8317	3.38605	2.44844	3.16749	2.63397	2.03134	1.82599	2.23932
ENSMUSG00000027954	105.593	104.517	131.11	91.669	94.2814	100.194	114.665	67.0564	55.1144	53.8143	99.4047	60.3455	95.9182	66.9103	0.50802	4.4531e-05	0.000347	Efna1	chr3	-	89271733	89281142	1632	protein_coding	ephrin_A1	101	121	154	91	78	105	144	73	50	55	85	63	80	67	3.07853	3.02464	3.80089	2.63195	2.71879	2.86954	3.37477	1.83569	1.47141	1.46113
ENSMUSG00000004266	49.1374	28.5048	33.2031	39.2867	22.966	43.8944	35.0365	22.0459	18.7389	21.5257	30.4061	18.1994	31.1734	15.9786	0.50741	0.0014714	0.0074011	Ptpn6	chr6	-	124720707	124738714	2308	protein_coding	protein_tyrosine_phosphatase_non-receptor_type_6	47	33	39	39	19	46	44	24	17	22	26	19	26	16	1.01299	0.583293	0.680634	0.797601	0.468295	0.888925	0.729153	0.426749	0.353751	0.413269
ENSMUSG00000005667	277.051	252.224	507.411	454.315	403.718	422.722	240.478	204.844	201.719	226.02	245.588	286.402	268.571	213.713	0.50722	0.00050508	0.0029475	Mthfd2	chr6	-	83305691	83317606	2085	protein_coding	methylenetetrahydrofolate_dehydrogenase_(NAD+_dependent)_methenyltetrahydrofolate_cyclohydrolase	265	292	596	451	334	443	302	223	183	231	210	299	224	214	6.32239	5.71328	11.514	10.21	9.11259	9.47635	5.53991	4.38931	4.21531	4.80343
ENSMUSG00000101365	3.13643	4.3189	8.51361	6.04411	6.04368	6.67958	7.16656	0.918581	1.10229	0.978443	1.16947	3.83146	2.39796	2.99598	0.50627	0.0030403	0.013709	RP23-401G21.7	chr9	-	97047444	97067307	3382	lincRNA	predicted_gene_19325	3	5	10	6	5	7	9	1	1	1	1	4	2	3	0.0441255	0.0603122	0.1191	0.0837403	0.0841003	0.092314	0.101782	0.0121345	0.0142007	0.0128195
ENSMUSG00000060519	216.414	188.304	143.88	207.514	186.145	200.387	219.774	134.113	108.024	157.529	140.336	123.565	128.291	138.814	0.50621	1.4041e-07	1.7764e-06	Tor3a	chr1	-	156653617	156674356	3545	protein_coding	torsin_family_3_member_A	207	218	169	206	154	210	276	146	98	161	120	129	107	139	2.90466	2.5087	1.92024	2.74289	2.47119	2.64208	2.9778	1.69018	1.32768	1.96904
ENSMUSG00000074627	15.6821	20.7307	25.5408	14.1029	18.131	19.0845	15.9257	16.5345	8.81831	10.7629	11.6947	8.62079	5.99489	10.9853	0.5062	0.003952	0.017031	Mroh8	chr2	-	157208550	157279549	3460	protein_coding	maestro_heat-like_repeat_family_member_8	15	24	30	14	15	20	20	18	8	11	10	9	5	11	0.215654	0.282972	0.349245	0.190989	0.246613	0.257809	0.221083	0.213498	0.111045	0.137836
ENSMUSG00000039202	1183.48	1252.48	1519.68	1223.93	1317.52	1310.15	1287.59	873.57	902.774	898.21	958.963	881.236	877.652	970.699	0.50572	1.2814e-22	6.2846e-21	Abhd2	chr7	+	79273201	79365508	6875	protein_coding	abhydrolase_domain_containing_2	1132	1450	1785	1215	1090	1373	1617	951	819	918	820	920	732	972	8.1906	8.60407	10.458	8.34181	9.01893	8.9072	8.99579	5.67682	5.72131	5.78916
ENSMUSG00000020122	373.235	359.333	454.627	481.514	432.727	543.908	411.679	260.877	276.674	296.468	314.587	347.705	333.316	279.625	0.50437	4.3149e-09	6.764e-08	Egfr	chr11	+	16752203	16918158	10208	protein_coding	epidermal_growth_factor_receptor	357	416	534	478	358	570	517	284	251	303	269	363	278	280	1.73968	1.6625	2.1071	2.21026	1.995	2.49045	1.9371	1.14176	1.18091	1.28691
ENSMUSG00000041577	1212.75	1239.52	1254.91	1081.9	1288.51	1364.54	1326.61	907.558	578.701	857.116	1046.67	649.433	870.458	1038.61	0.50424	3.7322e-06	3.6513e-05	Prelp	chr1	-	133910304	133921414	3615	protein_coding	proline_arginine-rich_end_leucine-rich_repeat	1160	1435	1474	1074	1066	1430	1666	988	525	876	895	678	726	1040	15.9622	16.1939	16.4238	14.0234	16.7745	17.6429	17.6266	11.2162	6.97486	10.5061
ENSMUSG00000029658	85.729	81.1954	80.8793	73.5366	59.228	74.4296	87.5912	73.4865	45.1938	44.0299	49.1176	50.7669	32.3724	62.9156	0.50377	0.000123	0.00084965	Wdr95	chr5	+	149528679	149611894	2574	protein_coding	WD40_repeat_domain_95	82	94	95	73	49	78	110	80	41	45	42	53	27	63	1.5847	1.4898	1.48662	1.33866	1.0829	1.35154	1.6345	1.27549	0.764997	0.757966
ENSMUSG00000062157	12.5457	19.0032	8.51361	16.1176	6.04368	6.67958	14.3331	2.75574	4.40915	8.80598	9.35574	4.78933	4.79591	4.99331	0.50367	0.0055714	0.022666	Ifnlr1	chr4	+	135686287	135708181	4182	protein_coding	interferon_lambda_receptor_1	12	22	10	16	5	7	18	3	4	9	8	5	4	5	0.142738	0.214609	0.0963165	0.18059	0.0680123	0.0746547	0.164623	0.0294398	0.0459368	0.0933048
ENSMUSG00000054072	41.819	61.3284	34.0544	25.1838	45.932	18.1303	35.8328	24.8017	31.9664	13.6982	9.35574	21.073	26.3775	24.9665	0.50364	0.0038383	0.016633	Iigp1	chr18	+	60376029	60392627	3121	protein_coding	interferon_inducible_GTPase_1	40	71	40	25	38	19	45	27	29	14	8	22	22	25	0.637541	0.928054	0.516239	0.378097	0.692614	0.271521	0.551469	0.355032	0.446261	0.194482
ENSMUSG00000021583	483.01	610.693	495.492	496.624	484.703	510.51	491.307	334.363	357.141	401.161	375.399	335.253	374.081	318.573	0.50266	2.6636e-14	7.5071e-13	Erap1	chr13	+	74639872	74691875	4014	protein_coding	endoplasmic_reticulum_aminopeptidase_1	462	707	582	493	401	535	617	364	324	410	321	350	312	319	5.72541	7.1854	5.84023	5.79731	5.68288	5.94456	5.87909	3.72153	3.87661	4.42845
ENSMUSG00000035352	3.13643	5.18268	13.6218	11.0809	8.46115	9.54225	3.98142	3.67432	1.10229	3.91377	0	0	5.99489	0	0.50249	0.0022254	0.010544	Ccl12	chr11	+	82101845	82103400	537	protein_coding	chemokine_(C-C_motif)_ligand_12	3	6	16	11	7	10	5	4	1	4	0	0	5	0	0.2779	0.455812	1.20014	0.966885	0.741524	0.830556	0.356121	0.305691	0.0894355	0.322947
ENSMUSG00000017978	193.413	241.859	271.584	206.507	181.31	219.472	241.274	139.624	139.991	143.831	143.844	136.975	229.005	130.825	0.50226	3.4682e-06	3.409e-05	Cadps2	chr6	-	23262773	23839421	4969	protein_coding	Ca2+-dependent_activator_protein_for_secretion_2	185	280	319	205	150	230	303	152	127	147	123	143	191	131	1.85201	2.29878	2.58587	1.94734	1.71721	2.06444	2.33225	1.25537	1.22749	1.28261
ENSMUSG00000040229	33.4552	59.6009	69.8116	50.3676	36.2621	62.9789	60.5176	25.7203	27.5572	43.0515	29.2367	39.2725	37.1683	38.9478	0.50208	0.00080467	0.0044094	Gpr34	chrX	+	13632089	13640858	2088	protein_coding	G_protein-coupled_receptor_34	32	69	82	50	30	66	76	28	25	44	25	41	31	39	0.762362	1.34812	1.58186	1.13031	0.81732	1.4098	1.39215	0.550332	0.575035	0.913625
ENSMUSG00000047638	129.639	127.84	112.38	102.75	130.543	111.644	123.424	74.4051	98.1037	96.8658	100.574	55.5562	63.5458	78.8942	0.50153	1.0406e-05	9.3528e-05	Nr1h4	chr10	-	89454234	89533585	2013	protein_coding	nuclear_receptor_subfamily_1_group_H_member_4	124	148	132	102	108	117	155	81	89	99	86	58	53	79	3.06422	2.99935	2.64128	2.39173	3.05198	2.5923	2.94503	1.65135	2.12339	2.13225
ENSMUSG00000029723	1121.8	1079.73	1052.28	961.013	1046.77	954.225	981.818	746.806	695.544	739.703	747.29	661.885	761.351	702.059	0.50104	4.5792e-25	2.6491e-23	Tsc22d4	chr5	+	137745730	137768450	3983	protein_coding	TSC22_domain_family_member_4	1073	1250	1236	954	866	1000	1233	813	631	756	639	691	635	703	13.4008	12.8029	12.4995	11.3056	12.3683	11.1978	11.8401	8.37678	7.60858	8.22919
ENSMUSG00000015970	130.684	135.614	163.461	140.022	132.961	136.454	117.054	75.3236	68.3419	81.2107	98.2352	101.534	105.51	120.838	0.50096	4.6312e-06	4.447e-05	Chdh	chr14	+	30009023	30040466	5629	protein_coding	choline_dehydrogenase	125	157	192	139	110	143	147	82	62	83	84	106	88	121	1.10464	1.13783	1.3739	1.16557	1.11164	1.13305	0.998822	0.597833	0.528987	0.639282
ENSMUSG00000040466	85.729	71.6938	75.7711	84.6175	80.9853	81.1091	90.7764	44.0919	47.3984	54.7928	64.3207	62.2613	50.3571	62.9156	0.50081	1.2682e-05	0.00011131	Blvrb	chr7	+	27447978	27466144	1028	protein_coding	biliverdin_reductase_B_(flavin_reductase_(NADPH))	82	83	89	84	67	85	114	48	43	56	55	65	42	63	3.96792	3.29377	3.48724	3.85694	3.70752	3.68782	4.24144	1.91622	2.00891	2.36179
ENSMUSG00000032733	238.369	194.351	190.705	194.419	207.903	214.701	206.238	135.031	130.07	146.766	147.353	133.143	134.286	173.767	0.50031	1.2604e-09	2.1431e-08	Snx33	chr9	-	56917200	56928371	4564	protein_coding	sorting_nexin_33	228	225	224	193	172	225	259	147	118	150	126	139	112	174	2.48503	2.01116	1.97691	1.99604	2.1438	2.19877	2.17048	1.32181	1.24171	1.42492
ENSMUSG00000040717	139.048	149.434	121.745	102.75	120.874	152.676	144.924	75.3236	74.9556	91.9736	114.608	68.9663	95.9182	111.85	0.50019	1.308e-05	0.00011421	Il17rd	chr14	+	27039001	27107286	8220	protein_coding	interleukin_17_receptor_D	133	173	143	102	100	160	182	82	68	94	98	72	80	112	0.804862	0.858585	0.700727	0.585713	0.692037	0.868143	0.846841	0.409392	0.397303	0.495795
ENSMUSG00000015243	940.928	954.477	939.051	884.454	948.857	968.539	1152.22	621.879	539.019	730.897	747.29	725.104	702.601	675.095	0.50013	1.7279e-13	4.5481e-12	Abca1	chr4	-	53030787	53159895	10262	protein_coding	ATP-binding_cassette_sub-family_A_(ABC1)_member_1	900	1105	1103	878	785	1015	1447	677	489	747	639	757	586	676	4.36267	4.39278	4.3294	4.03849	4.3515	4.41141	5.3931	2.70741	2.28855	3.15598
ENSMUSG00000033965	577.103	642.653	607.872	510.727	585.028	577.306	605.176	444.593	414.46	428.558	493.515	295.023	351.3	422.434	0.5001	8.5612e-10	1.4923e-08	Slc16a2	chrX	-	103697414	103821965	4134	protein_coding	solute_carrier_family_16_(monocarboxylic_acid_transporters)_member_2	552	744	714	507	484	605	760	484	376	438	422	308	293	423	6.64218	7.34195	6.95684	5.78887	6.66003	6.52722	7.03145	4.80476	4.36819	4.59356
ENSMUSG00000085249	21.955	12.0929	15.3245	18.1323	9.66988	25.7641	19.9071	3.67432	7.71602	6.8491	11.6947	13.4101	8.39284	14.9799	0.49968	0.0055947	0.022736	Gm12847	chr4	+	115818857	115822655	413	lincRNA	predicted_gene_12847	21	14	18	18	8	27	25	4	7	7	10	14	7	15	2.52936	1.38289	1.75552	2.05721	1.1019	2.9158	2.31522	0.397472	0.814015	0.734842
ENSMUSG00000070803	75.2743	69.9662	81.7307	68.4999	93.0726	73.4753	85.9987	46.8476	50.7053	61.6419	76.0154	38.3146	44.3622	49.9331	0.49817	7.6728e-05	0.00056469	Cited4	chr4	+	120666572	120667820	1249	protein_coding	Cbp/p300-interacting_transactivator_with_Glu/Asp-rich_carboxy-terminal_domain_4	72	81	96	68	77	77	108	51	46	63	65	40	37	50	2.86756	2.64564	3.09595	2.56982	3.50695	2.74961	3.30722	1.67573	1.7688	2.18687
ENSMUSG00000097073	332.461	310.961	275.841	322.352	293.723	329.208	339.217	193.821	268.958	209.387	222.199	212.646	217.015	216.709	0.49782	1.1968e-11	2.5943e-10	9430037G07Rik	chr9	-	88595325	88599516	3177	lincRNA	RIKEN_cDNA_9430037G07_gene	318	360	324	320	243	345	426	211	244	214	190	222	181	217	4.97911	4.62268	4.10783	4.75433	4.35101	4.84334	5.12855	2.7256	3.68856	2.9204
ENSMUSG00000042444	5072.65	5408.99	4994.94	4921.92	4896.59	4975.33	4988.72	3431.82	3800.69	3598.71	3510.74	3555.6	3444.66	3573.21	0.49765	3.0774e-58	6.3192e-56	Fam63b	chr9	-	70599014	70657174	8081	protein_coding	family_with_sequence_similarity_63_member_B	4852	6262	5867	4886	4051	5214	6265	3736	3448	3678	3002	3712	2873	3578	29.8674	31.6124	29.2439	28.5394	28.5166	28.7772	29.6523	18.9731	20.4921	19.733
ENSMUSG00000031367	1343.44	1435.6	1306.84	1234.01	1180.93	1227.13	1143.46	869.896	1020.72	920.714	884.117	842.922	845.279	851.858	0.49723	3.0636e-19	1.2364e-17	Ap1s2	chrX	+	163909017	163933666	3199	protein_coding	adaptor-related_protein_complex_1_sigma_2_subunit	1285	1662	1535	1225	977	1286	1436	947	926	941	756	880	705	853	19.9816	21.1946	19.3276	18.075	17.3733	17.9296	17.1689	12.1488	13.9021	12.7533
ENSMUSG00000099083	2148.45	2067.03	2172.67	2273.59	1767.17	2041.09	2300.46	1483.51	1657.84	1263.17	1508.61	1581.44	1534.69	1338.21	0.49689	5.3691e-16	1.7238e-14	Atf7	chr15	-	102525946	102625464	7147	protein_coding	activating_transcription_factor_7	2055	2393	2552	2257	1462	2139	2889	1615	1504	1291	1290	1651	1280	1340	14.3031	13.6593	14.3827	14.9061	11.6366	13.3484	15.4606	9.27354	10.1067	7.83156
ENSMUSG00000085691	120.23	121.793	90.2443	118.867	88.2377	112.599	75.647	84.5094	71.6487	54.7928	54.965	80.4607	63.5458	76.8969	0.49666	5.6003e-05	0.00042766	Gm14216	chr2	-	154722352	154738451	492	lincRNA	predicted_gene_14216	115	141	106	118	73	118	95	92	65	56	47	84	53	77	11.6272	11.6913	8.67811	11.3207	8.44032	10.697	7.38517	7.67396	6.34502	4.93479
ENSMUSG00000041075	269.733	296.277	259.665	215.573	242.956	264.32	358.328	174.53	147.707	175.141	190.623	186.784	240.995	199.732	0.49594	8.8471e-07	9.7188e-06	Fzd7	chr1	+	59482424	59486955	4532	protein_coding	frizzled_homolog_7_(Drosophila)	258	343	305	214	201	277	450	190	134	179	163	195	201	200	2.83186	3.08754	2.71078	2.22885	2.52294	2.72605	3.79774	1.72052	1.42004	1.71241
ENSMUSG00000020282	216.414	208.171	249.449	204.492	218.781	191.799	212.608	155.24	100.308	179.055	160.217	131.228	170.255	139.813	0.49585	2.5209e-07	3.0687e-06	Rhbdf1	chr11	-	32209585	32222300	5089	protein_coding	rhomboid_family_1_(Drosophila)	207	241	293	203	181	201	267	169	91	183	137	137	142	140	2.02339	1.93194	2.3191	1.88287	2.02324	1.7616	2.00669	1.36286	0.858803	1.55907
ENSMUSG00000022969	69.0014	84.6505	71.5143	62.4558	42.3057	77.2922	72.4618	45.0105	42.9892	49.9006	47.9482	40.2303	47.9591	49.9331	0.49541	0.0001059	0.00075038	Il10rb	chr16	+	91406164	91425834	2791	protein_coding	interleukin_10_receptor_beta	66	98	84	62	35	81	91	49	39	51	41	42	40	50	1.17632	1.43244	1.21228	1.04855	0.713361	1.2944	1.24705	0.720499	0.671103	0.792239
ENSMUSG00000009628	120.23	153.753	129.407	135.992	99.1163	121.187	114.665	84.5094	81.5693	87.0814	101.744	76.6292	91.1223	81.8902	0.49475	1.2929e-06	1.3797e-05	Tex15	chr8	+	33516738	33585582	8405	protein_coding	testis_expressed_gene_15	115	178	152	135	82	127	144	92	74	89	87	80	76	82	0.680616	0.863955	0.728434	0.758146	0.55498	0.673922	0.65528	0.449208	0.422842	0.45909
ENSMUSG00000031980	184.004	183.985	262.219	267.955	338.446	231.877	199.867	137.787	114.638	212.322	189.454	161.879	127.092	173.767	0.49471	8.4066e-05	0.00061385	Agt	chr8	-	124556534	124569706	1891	protein_coding	angiotensinogen_(serpin_peptidase_inhibitor_clade_A_member_8)	176	213	308	266	280	243	251	150	104	217	162	169	106	174	4.62981	4.59512	6.5606	6.63967	8.42302	5.73137	5.07673	3.25534	2.64135	4.97524
ENSMUSG00000043008	25.0914	31.9599	23.8381	14.1029	10.8786	23.8556	22.296	9.18581	16.5343	9.78443	12.8641	1.91573	1.19898	21.9705	0.4945	0.0065029	0.02581	Klhl6	chr16	-	19946499	19983037	2386	protein_coding	kelch-like_6	24	37	28	14	9	25	28	10	15	10	11	2	1	22	0.50036	0.632616	0.472685	0.276958	0.214572	0.467318	0.448838	0.171999	0.301929	0.181709
ENSMUSG00000047910	619.967	625.377	581.48	572.176	560.853	583.032	710.285	372.025	426.586	408.011	403.466	542.152	388.469	433.419	0.4944	1.9688e-11	4.1805e-10	Pcdhb16	chr18	+	37477768	37483035	5268	protein_coding	protocadherin_beta_16	593	724	683	568	464	611	892	405	387	417	345	566	324	434	5.59952	5.60663	5.22227	5.08931	5.01041	5.17296	6.47621	3.15505	3.52817	3.43191
ENSMUSG00000047033	234.187	219.4	164.313	184.345	217.572	151.722	234.107	128.601	128.968	136.004	128.641	143.68	146.275	155.791	0.49432	5.3821e-07	6.151e-06	Pcdhb15	chr18	+	37473546	37476340	2795	protein_coding	protocadherin_beta_15	224	254	193	183	180	159	294	140	117	139	110	150	122	156	3.98665	3.70733	2.78138	3.09048	3.66347	2.53722	4.02316	2.05562	2.01043	2.15615
ENSMUSG00000086588	15.6821	9.50158	12.7704	7.05146	8.46115	10.4965	17.5182	6.43007	6.61373	7.82754	5.84734	2.8736	7.19387	4.99331	0.49363	0.0066628	0.026322	Gm11729	chr11	+	117414389	117415368	713	lincRNA	predicted_gene_11729	15	11	15	7	7	11	22	7	6	8	5	3	6	5	1.04651	0.629379	0.847396	0.46341	0.558483	0.688092	1.18014	0.402908	0.404153	0.486459
ENSMUSG00000029771	50.1828	39.7339	60.4466	52.3823	38.6795	60.1162	59.7213	28.476	42.9892	31.3102	50.2871	26.8202	32.3724	25.9652	0.49362	0.00072555	0.0040242	Irf5	chr6	+	29526625	29541869	2241	protein_coding	interferon_regulatory_factor_5	48	46	71	52	32	63	75	31	39	32	43	28	27	26	1.06547	0.837384	1.27615	1.09526	0.812287	1.25384	1.28003	0.567697	0.835809	0.61909
ENSMUSG00000054582	46.0009	43.189	40.014	56.4117	48.3494	36.2606	30.2588	24.8017	30.8641	28.3748	25.7283	27.7781	32.3724	24.9665	0.4936	0.00070541	0.0039281	Pabpc1l	chr2	+	164025450	164050538	2354	protein_coding	poly(A)_binding_protein_cytoplasmic_1-like	44	50	47	56	40	38	38	27	28	29	22	29	27	25	0.929797	0.866508	0.804222	1.12289	0.966618	0.71998	0.617418	0.470711	0.571263	0.534118
ENSMUSG00000014361	272.869	268.636	277.544	296.161	296.14	282.451	276.311	173.612	180.775	183.947	174.251	236.593	224.209	203.727	0.49227	5.3195e-11	1.0654e-09	Mertk	chr2	+	128698956	128802894	4302	protein_coding	c-mer_proto-oncogene_tyrosine_kinase	261	311	326	294	245	296	347	189	164	188	149	247	187	204	3.01795	2.94916	3.05233	3.22577	3.23964	3.06877	3.08504	1.80297	1.83087	1.89467
ENSMUSG00000026836	382.644	405.977	470.803	399.918	465.363	404.591	436.364	271.9	288.8	290.597	308.739	278.739	326.122	323.566	0.49185	3.8042e-14	1.0642e-12	Acvr1	chr2	-	58388644	58567157	3293	protein_coding	activin_A_receptor_type_1	366	470	553	397	385	424	548	296	262	297	264	291	272	324	5.5288	5.82257	6.76422	5.69057	6.65075	5.74272	6.36489	3.6889	3.82115	3.9103
ENSMUSG00000073424	29.2733	42.3252	19.5813	13.0956	25.3834	27.6725	30.2588	18.3716	11.0229	25.4395	18.7115	0.957865	8.39284	13.9813	0.49173	0.0068429	0.026868	Cyp4f15	chr17	+	32685627	32703352	2168	protein_coding	cytochrome_P450_family_4_subfamily_f_polypeptide_15	28	49	23	13	21	29	38	20	10	26	16	1	7	14	0.642452	0.922031	0.42732	0.283035	0.551012	0.596598	0.670388	0.378589	0.221526	0.519948
ENSMUSG00000050164	52.2738	45.7804	51.0817	41.3014	56.8106	33.3979	47.777	36.7432	16.5343	27.3964	33.9145	36.3989	31.1734	30.9585	0.49156	0.00073294	0.0040604	Mchr1	chr15	+	81235499	81238963	2188	protein_coding	melanin-concentrating_hormone_receptor_1	50	53	60	41	47	35	60	40	15	28	29	38	26	31	1.13675	0.988183	1.10456	0.88449	1.22195	0.713451	1.04883	0.750256	0.329252	0.554826
ENSMUSG00000073591	444.327	391.293	372.896	416.036	375.917	375.011	362.309	265.47	261.242	249.503	259.622	298.854	285.357	301.596	0.49139	6.0235e-14	1.665e-12	Pcdhb22	chr18	+	37518353	37521419	3067	protein_coding	protocadherin_beta_22	425	453	438	413	311	393	455	289	237	255	222	312	238	302	6.89314	6.0255	5.75234	6.35613	5.7683	5.71508	5.67414	3.86706	3.71124	3.60472
ENSMUSG00000079070	29.2733	9.50158	10.2163	12.0882	12.0874	19.0845	11.9443	6.43007	11.0229	7.82754	3.5084	8.62079	10.7908	4.99331	0.49136	0.0068976	0.027032	Gm3985	chr8	-	32888505	32950026	2515	lincRNA	predicted_gene_3985	28	11	12	12	10	20	15	7	10	8	3	9	9	5	0.553811	0.178428	0.192189	0.225216	0.226185	0.354679	0.228116	0.114224	0.190962	0.137911
ENSMUSG00000000365	13.5912	20.7307	5.95953	15.1103	7.25241	42.9401	18.3145	3.67432	6.61373	9.78443	8.18627	12.4523	7.19387	9.98661	0.49127	0.0066862	0.02639	Rnf17	chr14	+	56402697	56525032	5148	protein_coding	ring_finger_protein_17	13	24	7	15	6	45	23	4	6	10	7	13	6	10	0.125616	0.190187	0.0547702	0.137534	0.0663001	0.389868	0.17088	0.0318874	0.0559754	0.0842184
ENSMUSG00000002831	123.366	126.976	126.001	176.286	145.048	168.898	122.628	74.4051	57.319	101.758	178.928	68.0084	93.5203	68.9076	0.49073	0.0010338	0.0054586	Plin4	chr17	-	56100591	56109803	5756	protein_coding	perilipin_4	118	147	148	175	120	177	154	81	52	104	153	71	78	69	1.01977	1.04185	1.03568	1.43507	1.18594	1.3715	1.0233	0.577512	0.433877	0.783354
ENSMUSG00000085839	10.4548	13.8205	10.2163	15.1103	4.83494	21.9472	22.296	3.67432	6.61373	13.6982	3.5084	9.57865	1.19898	6.99063	0.4894	0.0068025	0.026738	Gm15949	chr5	-	66985091	66985641	126	antisense	predicted_gene_15949	10	16	12	15	4	23	28	4	6	14	3	10	1	7	3.94795	5.18034	3.83615	5.61924	1.80589	8.14143	8.49942	1.30283	2.28699	4.81729
ENSMUSG00000042254	18.8186	17.2756	10.2163	24.1764	13.2961	24.8099	22.296	7.34865	8.81831	2.93533	5.84734	17.2416	83.9284	13.9813	0.48915	0.0068804	0.026987	Cilp	chr9	+	65265180	65280605	4153	protein_coding	cartilage_intermediate_layer_protein_nucleotide_pyrophosphohydrolase	18	20	12	24	11	26	28	8	8	3	5	18	70	14	0.215602	0.196461	0.116387	0.272776	0.150672	0.279225	0.257868	0.0790542	0.0925151	0.0313188
ENSMUSG00000017057	50.1828	59.6009	39.1626	42.3088	51.9756	38.169	35.8328	31.2318	30.8641	32.2886	31.5756	18.1994	21.5816	38.9478	0.48901	0.0011004	0.0057599	Il13ra1	chrX	+	36112110	36171259	3712	protein_coding	interleukin_13_receptor_alpha_1	48	69	46	42	43	40	45	34	28	33	27	19	18	39	0.643243	0.758316	0.499154	0.53407	0.658964	0.480613	0.463667	0.375896	0.362272	0.385435
ENSMUSG00000021457	26.1369	27.641	27.2436	45.3308	19.3398	20.993	47.777	29.3946	14.3297	16.6335	30.4061	13.4101	4.79591	8.98795	0.48797	0.0068048	0.026741	Syk	chr13	+	52583173	52648792	5363	protein_coding	spleen_tyrosine_kinase	25	32	32	45	16	22	60	32	13	17	26	14	4	9	0.231886	0.243417	0.24034	0.39606	0.169712	0.182961	0.427903	0.244872	0.116418	0.137432
ENSMUSG00000034714	1800.31	1439.92	1668.67	1906.92	1732.12	1657.49	1435.7	1079.33	1300.7	1260.23	1134.38	1145.61	996.351	1273.29	0.48793	5.2111e-13	1.3106e-11	Ttyh2	chr11	+	114675431	114720977	3486	protein_coding	tweety_homolog_2_(Drosophila)	1722	1667	1960	1893	1433	1737	1803	1175	1180	1288	970	1196	831	1275	24.5724	19.5082	22.6471	25.6318	23.3841	22.2237	19.782	13.8327	16.257	16.019
ENSMUSG00000097194	10.4548	6.04646	12.7704	10.0735	3.62621	0.954225	3.18514	2.75574	0	0	3.5084	0	2.39796	0	0.48788	0.0014096	0.0071244	9330175E14Rik	chr8	-	94422899	94435105	4388	lincRNA	RIKEN_cDNA_9330175E14_gene	10	7	15	10	3	1	4	3	0	0	3	0	2	0	0.113364	0.0650789	0.137692	0.10757	0.0388916	0.0101643	0.0348655	0.0280577	0	0
ENSMUSG00000037731	14.6367	13.8205	12.7704	7.05146	16.9223	13.3592	12.7405	4.5929	4.40915	10.7629	5.84734	6.70506	9.59182	6.99063	0.48708	0.0071591	0.02787	Themis2	chr4	-	132781843	132796387	3079	protein_coding	thymocyte_selection_associated_family_member_2	14	16	15	7	14	14	16	5	4	11	5	7	8	7	0.226183	0.211992	0.19623	0.107311	0.258654	0.202797	0.198752	0.0666434	0.0623928	0.154892
ENSMUSG00000031803	17.7731	26.7772	20.4327	15.1103	14.5048	17.1761	16.722	5.51149	15.432	9.78443	16.3725	13.4101	7.19387	6.99063	0.48695	0.0060904	0.024427	B3gnt3	chr8	-	71691719	71701800	2103	protein_coding	UDP-GlcNAc:betaGal_beta-13-N-acetylglucosaminyltransferase_3	17	31	24	15	12	18	21	6	14	10	14	14	6	7	0.402116	0.601356	0.459681	0.336673	0.324596	0.381748	0.381929	0.117087	0.319723	0.206161
ENSMUSG00000090017	4.1819	10.3654	10.2163	12.0882	12.0874	13.3592	12.7405	0.918581	1.10229	11.7413	2.33893	7.66292	0	3.99464	0.48668	0.0052822	0.021761	Gm16213	chr3	+	152920240	152921399	639	antisense	predicted_gene_16213	4	12	12	12	10	14	16	1	1	12	2	8	0	4	0.311387	0.766107	0.756423	0.886415	0.890226	0.977171	0.957682	0.0642238	0.0751595	0.814191
ENSMUSG00000040987	18.8186	18.1394	11.9191	6.04411	10.8786	14.3134	11.9443	9.18581	5.51144	9.78443	4.67787	4.78933	8.39284	5.99197	0.48631	0.0074143	0.028614	Mill2	chr7	+	18839966	18858654	1121	protein_coding	MHC_I_like_leukocyte_2	18	21	14	6	9	15	15	10	5	10	4	5	7	6	0.798746	0.764227	0.503045	0.25264	0.456708	0.5968	0.511785	0.366093	0.214214	0.386759
ENSMUSG00000073555	11.5002	14.6843	3.40544	7.05146	13.2961	4.77113	14.3331	1.83716	0	7.82754	0	4.78933	0	5.99197	0.4857	0.0035932	0.015731	Gm4951	chr18	+	60212080	60247820	2645	protein_coding	predicted_gene_4951	11	17	4	7	11	5	18	2	0	8	0	5	0	6	0.206875	0.2622	0.0609142	0.124919	0.236575	0.0843117	0.260285	0.0310314	0	0.131132
ENSMUSG00000085873	154.73	130.431	131.961	139.014	102.743	127.866	168.016	96.451	67.2396	121.327	106.422	87.1658	88.7244	88.8808	0.4856	1.609e-05	0.00013855	Gm12750	chr4	-	109403794	109406155	796	antisense	predicted_gene_12750	148	151	155	138	85	134	211	105	61	124	91	91	74	89	9.24891	7.73878	7.84338	8.18319	6.07445	7.50819	10.1384	5.41344	3.68045	6.7539
ENSMUSG00000052430	272.869	294.549	319.26	319.33	322.732	376.919	316.921	203.925	209.435	234.826	238.571	188.699	238.597	249.665	0.48527	4.355e-10	7.916e-09	Bmpr1b	chr3	-	141837136	142169425	5349	protein_coding	bone_morphogenetic_protein_receptor_type_1B	261	341	375	317	267	395	398	222	190	240	204	197	199	250	2.42722	2.6007	2.82386	2.79733	2.83949	3.29358	2.84585	1.70325	1.70595	1.94529
ENSMUSG00000028780	106.639	162.391	196.664	166.213	134.17	160.31	118.646	77.1608	106.922	93.9305	127.472	86.2079	124.694	97.8688	0.48504	7.6482e-05	0.00056354	Sema3c	chr5	+	17574281	17730268	5491	protein_coding	sema_domain_immunoglobulin_domain_(Ig)_short_basic_domain_secreted_(semaphorin)_3C	102	188	231	165	111	168	149	84	97	96	109	90	104	98	0.924039	1.39674	1.69451	1.41837	1.14993	1.36459	1.03786	0.627805	0.848408	0.757994
ENSMUSG00000024912	198.64	183.121	204.327	173.264	190.98	167.944	199.867	146.973	114.638	136.004	112.269	130.27	151.071	131.823	0.48378	1.0128e-08	1.4969e-07	Fosl1	chr19	+	5447703	5455945	1707	protein_coding	fos-like_antigen_1	190	212	240	172	158	176	251	160	104	139	96	136	126	132	5.53684	5.06654	5.6632	4.75611	5.26532	4.59857	5.62396	3.84666	2.92607	3.53043
ENSMUSG00000020962	3415.57	3369.61	2915.91	3061.34	2789.76	3425.67	2881.75	2273.49	2354.49	2045.92	2185.73	2175.31	2120.99	2377.81	0.48241	3.7698e-20	1.612e-18	Gtf2a1	chr12	-	91555916	91590487	5410	protein_coding	general_transcription_factor_II_A_1	3267	3901	3425	3039	2308	3590	3619	2475	2136	2091	1869	2271	1769	2381	30.0396	29.4163	25.5005	26.5149	24.2683	29.5965	25.5855	18.7748	18.9622	16.7572
ENSMUSG00000055560	58.5466	70.83	36.6085	57.419	45.932	55.3451	49.3696	17.453	39.6824	29.3533	36.2535	56.5141	29.9744	30.9585	0.48206	0.0021226	0.010126	Zfp459	chr13	-	67405722	67421418	3321	protein_coding	zinc_finger_protein_459	56	82	43	57	38	58	62	19	36	30	31	59	25	31	0.838805	1.00729	0.521536	0.810145	0.650903	0.778937	0.714044	0.234791	0.520617	0.39165
ENSMUSG00000020044	1804.49	2024.7	2128.4	1901.88	2068.15	1929.44	1845.79	1291.52	1050.48	1472.56	1866.47	935.834	1556.27	1210.38	0.48189	4.1978e-05	0.00032889	Timp3	chr10	+	86300372	86349506	4722	protein_coding	tissue_inhibitor_of_metalloproteinase_3	1726	2344	2500	1888	1711	2022	2318	1406	953	1505	1596	977	1298	1212	18.1826	20.2507	21.3255	18.8726	20.6122	19.0985	18.7754	12.2196	9.69285	13.8184
ENSMUSG00000067714	11.5002	6.91024	4.25681	16.1176	8.46115	4.77113	13.5368	3.67432	0	2.93533	2.33893	2.8736	2.39796	9.98661	0.48187	0.0056281	0.022862	Lpar5	chr6	+	125067920	125082472	1458	protein_coding	lysophosphatidic_acid_receptor_5	11	8	5	16	7	5	17	4	0	3	2	3	2	10	0.375299	0.223842	0.138133	0.517987	0.273113	0.152952	0.445957	0.11259	0	0.0892092
ENSMUSG00000026961	16.7276	6.04646	12.7704	21.1544	14.5048	15.2676	14.3331	7.34865	3.30687	13.6982	10.5252	7.66292	5.99489	2.99598	0.48175	0.008095	0.030845	Lrrc26	chr2	+	25289915	25291180	1190	protein_coding	leucine_rich_repeat_containing_26	16	7	15	21	12	16	18	8	3	14	9	8	5	3	0.668829	0.239972	0.507725	0.832969	0.573635	0.599676	0.578532	0.275893	0.121076	0.510067
ENSMUSG00000032456	184.004	179.666	131.11	153.117	101.534	148.859	173.59	138.706	112.433	76.3185	108.76	83.3343	91.1223	119.839	0.48112	0.00010301	0.00073299	Nmnat3	chr9	+	98287435	98420438	2166	protein_coding	nicotinamide_nucleotide_adenylyltransferase_3	176	208	154	152	84	156	218	151	102	78	93	87	76	120	4.042	3.91754	2.86383	3.31239	2.20608	3.21225	3.84946	2.86098	2.26165	1.56128
ENSMUSG00000000562	10.4548	4.3189	7.66225	6.04411	3.62621	5.72535	11.9443	1.83716	5.51144	3.91377	2.33893	0.957865	3.59693	0	0.48088	0.0052245	0.021584	Adora3	chr3	+	105870858	105908928	2370	protein_coding	adenosine_A3_receptor	10	5	9	6	3	6	15	2	5	4	2	1	3	0	0.209891	0.0860658	0.15296	0.119498	0.0720069	0.112914	0.242072	0.0346321	0.101323	0.0731741
ENSMUSG00000006958	97.2293	76.0127	82.582	81.5955	68.8979	69.6584	81.221	58.7892	41.887	64.5772	74.8459	51.7247	44.3622	42.9424	0.48024	0.0001196	0.00082985	Chrd	chr16	+	20733127	20742384	4406	protein_coding	chordin	93	88	97	81	57	73	102	64	38	66	64	54	37	43	1.04998	0.814793	0.886772	0.867755	0.735922	0.738961	0.885437	0.596118	0.414213	0.649449
ENSMUSG00000032492	88.8655	85.5143	105.569	91.669	113.621	89.6972	107.498	78.0794	65.035	69.4694	70.168	49.809	70.7397	67.909	0.47978	1.2956e-05	0.00011333	Pth1r	chr9	-	110722088	110743686	2252	protein_coding	parathyroid_hormone_1_receptor	85	99	124	91	94	94	135	85	59	71	60	52	59	68	1.87755	1.79339	2.21788	1.90735	2.37444	1.86167	2.29281	1.54899	1.25825	1.3669
ENSMUSG00000024909	277.051	257.407	288.611	228.669	273.174	231.877	233.311	176.368	144.4	206.451	194.132	145.596	187.041	201.73	0.47929	4.7909e-08	6.5108e-07	Efemp2	chr19	+	5473973	5481853	1781	protein_coding	epidermal_growth_factor-containing_fibulin-like_extracellular_matrix_protein_2	265	298	339	227	226	243	293	192	131	211	166	152	156	202	7.40157	6.82592	7.66691	6.01615	7.21848	6.08535	6.29225	4.4242	3.53258	5.13646
ENSMUSG00000044217	60.6376	58.7371	75.7711	88.6469	59.228	73.4753	55.7399	26.6388	28.6595	27.3964	40.9314	19.1573	101.913	40.9451	0.47919	0.0057301	0.023186	Aqp5	chr15	+	99590849	99594829	1551	protein_coding	aquaporin_5	58	68	89	88	49	77	70	29	26	28	35	20	85	41	1.86019	1.78857	2.31133	2.6781	1.79716	2.21423	1.72619	0.767332	0.805093	0.782694
ENSMUSG00000030321	119.184	123.521	103.866	126.926	99.1163	120.232	123.424	90.0209	90.3877	76.3185	84.2016	66.0927	83.9284	79.8929	0.47892	1.5672e-06	1.6433e-05	Efcab12	chr6	-	115810729	115838412	2551	protein_coding	EF-hand_calcium_binding_domain_12	114	143	122	126	82	126	155	98	82	78	72	69	70	80	2.22298	2.28683	1.92634	2.3314	1.82854	2.20294	2.32393	1.57657	1.54379	1.32565
ENSMUSG00000010830	53.3193	53.5544	56.1898	39.2867	38.6795	33.3979	52.5547	25.7203	28.6595	27.3964	21.0504	36.3989	51.556	22.9692	0.4788	0.0019319	0.0093641	Kdelr3	chr15	+	79516408	79527739	1414	protein_coding	KDEL_(Lys-Asp-Glu-Leu)_endoplasmic_reticulum_protein_retention_receptor_3	51	62	66	39	32	35	66	28	26	28	18	38	43	23	1.79417	1.78876	1.88009	1.30188	1.28737	1.10398	1.78524	0.812654	0.883097	0.858528
ENSMUSG00000020580	4306.32	4162.56	4541.16	4321.54	4010.58	4329.32	4344.53	2688.69	3316.79	3085.03	3246.44	3242.37	3101.76	2748.32	0.47866	2.1079e-24	1.1619e-22	Rock2	chr12	+	16894978	16988274	8012	protein_coding	Rho-associated_coiled-coil_containing_protein_kinase_2	4119	4819	5334	4290	3318	4537	5456	2927	3009	3153	2776	3385	2587	2752	25.5736	24.5372	26.8162	25.2739	23.5579	25.2564	26.0457	14.9927	18.0371	17.062
ENSMUSG00000015533	25.0914	36.2788	29.7976	21.1544	27.8009	24.8099	57.3324	14.6973	27.5572	16.6335	16.3725	10.5365	34.7704	11.9839	0.47692	0.0069437	0.02719	Itga2	chr13	-	114835916	114932041	4214	protein_coding	integrin_alpha_2	24	42	35	21	23	26	72	16	25	17	14	11	29	12	0.283308	0.406596	0.334548	0.235224	0.310481	0.275183	0.653492	0.15582	0.284925	0.174904
ENSMUSG00000073968	156.821	121.793	99.6092	113.831	94.2814	105.919	106.702	75.3236	72.751	86.1029	85.3711	72.7978	81.5305	79.8929	0.47644	1.2802e-05	0.00011219	Trim68	chr7	-	102677580	102687326	2389	protein_coding	tripartite_motif-containing_68	150	141	117	113	78	111	134	82	66	88	73	76	68	80	3.12332	2.40775	1.97267	2.23264	1.85729	2.07229	2.14531	1.40862	1.32682	1.59703
ENSMUSG00000029915	14.6367	11.2291	11.9191	9.06616	13.2961	4.77113	7.96284	4.5929	4.40915	5.87066	4.67787	7.66292	3.59693	4.99331	0.47628	0.0088218	0.033195	Clec5a	chr6	-	40574894	40585821	3747	protein_coding	C-type_lectin_domain_family_5_member_a	14	13	14	9	11	5	10	5	4	6	4	8	3	5	0.18586	0.141537	0.150497	0.113375	0.166998	0.0595154	0.102075	0.0547625	0.0512697	0.0694246
ENSMUSG00000025877	13.5912	13.8205	20.4327	13.0956	25.3834	16.2218	17.5182	8.26723	8.81831	10.7629	12.8641	12.4523	3.59693	11.9839	0.47607	0.0073721	0.028495	Hk3	chr13	-	55005985	55021385	3219	protein_coding	hexokinase_3	13	16	24	13	21	17	22	9	8	11	11	13	3	12	0.200893	0.202772	0.300313	0.190625	0.371107	0.235544	0.261399	0.114741	0.119359	0.148155
ENSMUSG00000047250	41.819	60.4646	58.7439	43.3161	35.0533	50.5739	39.0179	23.8831	23.1481	33.267	50.2871	25.8624	27.5765	32.9558	0.476	0.00175	0.0085897	Ptgs1	chr2	+	36230426	36252272	2867	protein_coding	prostaglandin-endoperoxide_synthase_1	40	70	69	43	29	53	49	26	21	34	43	27	23	33	0.694023	0.996046	0.969407	0.707942	0.575402	0.824502	0.653688	0.372171	0.351784	0.514158
ENSMUSG00000022014	7.31833	12.0929	4.25681	4.02941	4.83494	3.8169	4.7777	2.75574	3.30687	1.95689	2.33893	0.957865	1.19898	0.998661	0.47515	0.0048875	0.020399	Epsti1	chr14	+	77904239	78002656	1869	protein_coding	epithelial_stromal_interaction_1_(breast)	7	14	5	4	4	4	6	3	3	2	2	1	1	1	0.186308	0.305582	0.107757	0.10102	0.121745	0.095454	0.122785	0.0658732	0.0770897	0.0463945
ENSMUSG00000000409	14.6367	19.867	17.0272	13.0956	22.966	18.1303	17.5182	9.18581	11.0229	12.7198	10.5252	13.4101	7.19387	8.98795	0.47469	0.0065266	0.025882	Lck	chr4	-	129548344	129573641	2185	protein_coding	lymphocyte_protein_tyrosine_kinase	14	23	20	13	19	19	22	10	10	13	9	14	6	9	0.318727	0.429423	0.368691	0.280833	0.494656	0.387834	0.3851	0.187822	0.219803	0.257951
ENSMUSG00000079505	5.22738	10.3654	6.81089	7.05146	6.04368	12.4049	8.75912	6.43007	3.30687	5.87066	0	0	2.39796	3.99464	0.47384	0.0068393	0.02686	Gm11131	chr17	-	35377021	35380292	3122	antisense	predicted_gene_11131	5	12	8	7	5	13	11	7	3	6	0	0	2	4	0.0796671	0.156804	0.103215	0.105833	0.0911042	0.185718	0.13476	0.0920157	0.0461501	0.0833228
ENSMUSG00000025017	90.9564	73.4213	80.8793	72.5293	65.2717	82.0634	72.4618	77.1608	36.3755	39.1377	57.3039	39.2725	56.352	57.9223	0.47302	0.00039356	0.0023647	Pik3ap1	chr19	-	41274218	41385070	2615	protein_coding	phosphoinositide-3-kinase_adaptor_protein_1	87	85	95	72	54	86	91	84	33	40	49	41	47	58	1.65497	1.32604	1.46331	1.29962	1.17469	1.4668	1.33098	1.31827	0.606075	0.663184
ENSMUSG00000050592	584.421	557.138	708.332	641.683	605.577	583.032	592.435	470.313	508.155	447.148	409.314	455.944	369.285	374.498	0.47297	2.3407e-11	4.92e-10	Fam78a	chr2	-	32050055	32084857	4107	protein_coding	family_with_sequence_similarity_78_member_A	559	645	832	637	501	611	744	512	461	457	350	476	308	375	6.77063	6.40684	8.15987	7.32102	6.93928	6.63529	6.92868	5.11614	5.39089	4.82433
ENSMUSG00000026946	64.8195	90.6969	95.3524	69.5072	53.1844	61.0704	81.221	49.6034	52.9098	50.879	67.8291	33.5253	40.7652	54.9264	0.47246	0.00058836	0.0033519	Nmi	chr2	-	51948487	51973494	1291	protein_coding	N-myc_(and_STAT)_interactor	62	105	112	69	44	64	102	54	48	52	58	35	34	55	2.38895	3.31797	3.49443	2.52278	1.93878	2.21104	3.02187	1.71658	1.78566	1.74632
ENSMUSG00000020901	150.549	158.072	123.447	120.882	111.204	111.644	146.516	106.555	90.3877	80.2323	94.7268	88.1236	80.3315	103.861	0.47244	6.0456e-06	5.6939e-05	Pik3r5	chr11	+	68432121	68497849	4370	protein_coding	phosphoinositide-3-kinase_regulatory_subunit_5_p101	144	183	145	120	92	117	184	116	82	82	81	92	67	104	1.63917	1.70836	1.33651	1.29615	1.19759	1.19412	1.61042	1.08937	0.901191	0.813539
ENSMUSG00000024026	5867.21	5434.04	5260.56	5217.07	5054.93	5709.13	5065.16	3950.82	3688.26	3879.52	3696.69	3763.45	4078.92	3948.71	0.47217	5.4871e-34	5.0758e-32	Glo1	chr17	-	30592866	30612659	1935	protein_coding	glyoxalase_1	5612	6291	6179	5179	4182	5983	6361	4301	3346	3965	3161	3929	3402	3954	144.271	132.632	128.624	126.334	122.943	137.905	125.732	91.219	83.048	88.8399
ENSMUSG00000097156	286.46	141.66	228.165	242.772	176.475	217.563	261.181	117.578	196.207	137.96	142.675	184.868	125.893	160.784	0.47199	0.00013396	0.00091757	Gm3764	chr3	+	88206813	88229959	2203	lincRNA	predicted_gene_3764	274	164	268	241	146	228	328	128	178	141	122	193	105	161	6.18697	3.03695	4.9001	5.16368	3.76999	4.61598	5.69458	2.38447	3.88052	2.77492
ENSMUSG00000034758	332.461	244.45	248.597	284.073	259.878	251.915	251.626	202.088	180.775	168.292	174.251	224.141	189.438	181.756	0.47166	1.2071e-08	1.765e-07	Tle6	chr10	-	81590904	81601073	2015	protein_coding	transducin-like_enhancer_of_split_6_homolog_of_Drosophila_E(spl)	318	283	292	282	215	264	316	220	164	172	149	234	158	182	7.85044	5.72955	5.83704	6.60588	6.06967	5.84349	5.99811	4.48069	3.90889	3.70083
ENSMUSG00000043088	29.2733	22.4583	45.9735	28.2058	45.932	28.6268	37.4253	18.3716	28.6595	20.5473	30.4061	11.4944	16.7857	23.9679	0.47107	0.0044992	0.019016	Il17re	chr6	+	113458484	113470751	2933	protein_coding	interleukin_17_receptor_E	28	26	54	28	38	30	47	20	26	21	26	12	14	24	0.474884	0.361635	0.741594	0.450612	0.737009	0.456197	0.612897	0.279843	0.425741	0.310422
ENSMUSG00000034361	142.185	97.6072	137.069	109.801	111.204	116.415	134.572	85.428	55.1144	85.1245	98.2352	69.9242	98.3162	96.8701	0.47067	4.5949e-05	0.00035716	Cpne2	chr8	+	94532990	94570529	2340	protein_coding	copine_II	136	113	161	109	92	122	169	93	50	87	84	73	82	97	2.89111	1.97002	2.77137	2.19871	2.23652	2.32534	2.76231	1.63104	1.02622	1.61194
ENSMUSG00000057969	342.916	342.057	378.856	349.551	426.684	342.567	328.069	222.297	144.4	270.05	330.959	208.815	314.132	252.661	0.47064	2.9667e-05	0.00024081	Sema3b	chr9	-	107597674	107609229	3433	protein_coding	sema_domain_immunoglobulin_domain_(Ig)_short_basic_domain_secreted_(semaphorin)_3B	328	396	445	347	353	359	412	242	131	276	283	218	262	253	4.75272	4.70577	5.2212	4.77103	5.84928	4.66406	4.59014	2.89293	1.83266	3.48563
ENSMUSG00000047205	64.8195	47.5079	50.2303	60.4411	70.1067	60.1162	98.7392	46.8476	31.9664	46.9652	42.1008	31.6096	58.7499	42.9424	0.47031	0.0013019	0.0066631	Dusp18	chr11	+	3895240	3901296	4632	protein_coding	dual_specificity_phosphatase_18	62	55	59	60	58	63	124	51	29	48	36	33	49	43	0.665832	0.484399	0.51306	0.61142	0.712296	0.606618	1.02389	0.451855	0.300686	0.449281
ENSMUSG00000023947	107.684	102.79	100.461	110.809	109.995	103.056	113.072	67.0564	82.6716	95.8874	84.2016	74.7135	62.3468	53.9277	0.47029	1.4225e-05	0.00012352	Nfkbie	chr17	+	45555716	45563169	2422	protein_coding	nuclear_factor_of_kappa_light_polypeptide_gene_enhancer_in_B_cells_inhibitor_epsilon	103	119	118	110	91	108	142	73	75	98	72	78	52	54	2.11546	2.00439	1.96242	2.14376	2.13732	1.98881	2.24242	1.23693	1.48721	1.75427
ENSMUSG00000060512	28.2278	41.4615	44.2708	38.2793	36.2621	42.9401	21.4997	30.3132	20.9435	22.5042	19.8809	14.368	25.1785	28.9612	0.46995	0.0033103	0.014724	0610040J01Rik	chr5	+	63812495	63899619	1870	protein_coding	RIKEN_cDNA_0610040J01_gene	27	48	52	38	30	45	27	33	19	23	17	15	21	29	0.718231	1.04715	1.12007	0.959177	0.912601	1.07328	0.552235	0.724218	0.487974	0.533251
ENSMUSG00000051439	19.864	27.641	27.2436	47.3455	32.6359	33.3979	20.7034	21.1274	7.71602	29.3533	11.6947	16.2837	19.1836	19.9732	0.46973	0.0066416	0.026277	Cd14	chr18	-	36725074	36726736	1572	protein_coding	CD14_antigen	19	32	32	47	27	35	26	23	7	30	10	17	16	20	0.601233	0.830436	0.81994	1.41124	0.977041	0.993022	0.632591	0.600444	0.21386	0.827398
ENSMUSG00000030263	19.864	20.7307	20.4327	21.1544	24.1747	23.8556	23.0922	14.6973	17.6366	8.80598	9.35574	12.4523	11.9898	19.9732	0.46964	0.0053642	0.022025	Lrmp	chr6	+	145115653	145174934	2319	protein_coding	lymphoid-restricted_membrane_protein	19	24	24	21	20	25	29	16	16	9	8	13	10	20	0.407563	0.422201	0.416865	0.42744	0.490603	0.48082	0.478299	0.28315	0.331363	0.168263
ENSMUSG00000030737	147.412	181.394	194.962	146.066	151.092	135.5	175.979	134.113	101.411	118.392	114.608	98.6601	115.102	115.845	0.46917	1.4574e-06	1.5386e-05	Slco2b1	chr7	-	99657804	99711340	4381	protein_coding	solute_carrier_organic_anion_transporter_family_member_2b1	141	210	229	145	125	142	221	146	92	121	98	103	96	116	1.60099	1.95549	2.10546	1.56225	1.62307	1.44563	1.92939	1.36766	1.00855	1.19745
ENSMUSG00000046546	728.697	707.436	672.575	671.903	749.416	720.44	666.49	489.604	466.268	453.019	589.411	538.32	473.596	512.313	0.4683	1.5294e-16	5.1032e-15	Fam43a	chr16	+	30599723	30602797	3075	protein_coding	family_with_sequence_similarity_43_member_A	697	819	790	667	620	755	837	533	423	463	504	562	395	513	11.2753	10.8654	10.3482	10.2385	11.4696	10.9508	10.4108	7.11343	6.60663	6.52802
ENSMUSG00000025915	132.775	158.936	139.623	154.125	120.874	146.951	152.09	96.451	98.1037	93.9305	113.438	120.691	85.1274	102.862	0.46769	6.6036e-07	7.4334e-06	Sgk3	chr1	+	9798107	9900845	3779	protein_coding	serum/glucocorticoid_regulated_kinase_3	127	184	164	153	100	154	191	105	89	96	97	126	71	103	1.67174	1.98632	1.74804	1.91105	1.5053	1.81755	1.93312	1.14027	1.13109	1.10139
ENSMUSG00000032508	224.777	212.49	212.84	185.353	184.937	240.465	206.238	179.123	125.661	147.745	159.048	150.385	116.301	156.79	0.46761	1.764e-07	2.2048e-06	Myd88	chr9	-	119335934	119341411	2458	protein_coding	myeloid_differentiation_primary_response_gene_88	215	246	250	184	153	252	259	195	114	151	136	157	97	157	4.35109	4.08284	4.09678	3.5334	3.54088	4.57259	4.03014	3.25574	2.22745	2.66343
ENSMUSG00000075297	11.5002	17.2756	5.95953	8.05881	6.04368	4.77113	19.1108	1.83716	2.20458	1.95689	2.33893	1.91573	10.7908	7.98929	0.46751	0.007261	0.028155	H60b	chr10	+	22158586	22288849	1080	protein_coding	histocompatibility_60b	11	20	7	8	5	5	24	2	2	2	2	2	9	8	0.506653	0.755466	0.261071	0.349641	0.263359	0.206486	0.849942	0.0759982	0.0889387	0.0802882
ENSMUSG00000028176	87.82	67.3749	53.6357	78.5734	66.4805	66.7958	73.2581	32.1503	51.8076	46.9652	47.9482	69.9242	47.9591	37.9491	0.46673	0.00057679	0.0032947	Lrrc7	chr3	-	158084439	158562221	5918	protein_coding	leucine_rich_repeat_containing_7	84	78	63	78	55	70	92	35	47	48	41	73	40	38	0.706067	0.537686	0.428795	0.622123	0.528675	0.527553	0.594586	0.242711	0.381423	0.351651
ENSMUSG00000030662	4857.28	4571.13	3955.42	4118.05	3975.53	4245.35	4159.79	2955.99	3065.46	3167.22	3129.49	2934.9	3300.79	2967.02	0.46625	4.637e-24	2.4898e-22	Ipo5	chr14	+	120911194	120948042	4591	protein_coding	importin_5	4646	5292	4646	4088	3289	4449	5224	3218	2781	3237	2676	3064	2753	2971	50.3401	47.0242	40.7621	42.0301	40.7528	43.2214	43.5209	28.7658	29.0923	30.569
ENSMUSG00000020703	6.27286	8.6378	19.5813	38.2793	14.5048	27.6725	23.8885	6.43007	8.81831	4.89221	8.18627	24.9045	5.99489	4.99331	0.4662	0.0096119	0.035601	5530401A14Rik	chr11	+	81860673	81894582	3654	protein_coding	RIKEN_cDNA_5530401A14_gene	6	10	23	38	12	29	30	7	8	5	7	26	5	5	0.0816816	0.111645	0.253538	0.490876	0.186816	0.353975	0.314018	0.0786188	0.105149	0.0593263
ENSMUSG00000040616	95.1383	114.883	115.785	87.6396	116.039	106.873	107.498	81.7537	63.9327	72.4047	77.1848	71.8399	104.311	44.9397	0.4657	0.0001147	0.00080033	Tmem51	chr4	-	142030992	142084304	1875	protein_coding	transmembrane_protein_51	91	133	136	87	96	112	135	89	58	74	66	75	87	45	2.41425	2.89374	2.92161	2.19015	2.91254	2.66416	2.75381	1.94799	1.48563	1.7111
ENSMUSG00000002249	1285.94	881.056	1113.58	1251.13	1049.18	1026.75	1016.85	775.282	880.728	718.177	775.357	793.113	800.917	703.057	0.46559	6.4303e-11	1.281e-09	Tead3	chr17	-	28331671	28350805	3441	protein_coding	TEA_domain_family_member_3	1230	1020	1308	1242	868	1076	1277	844	799	734	663	828	668	704	17.7812	12.0927	15.3111	17.037	14.3495	13.9467	14.1941	10.066	11.1518	9.2482
ENSMUSG00000067276	24.0459	36.2788	45.1221	30.2205	25.3834	25.7641	28.6662	11.023	14.3297	23.4826	38.5924	10.5365	19.1836	15.9786	0.46523	0.007347	0.028418	Capn6	chrX	-	143802231	143827414	4539	protein_coding	calpain_6	23	42	53	30	21	27	36	12	13	24	33	11	16	16	0.252063	0.377484	0.470327	0.311973	0.263185	0.265306	0.30335	0.108497	0.137552	0.229243
ENSMUSG00000036949	88.8655	113.155	107.271	63.4631	84.6115	83.9718	79.6284	75.3236	31.9664	68.491	88.8795	20.1152	53.954	59.9197	0.46431	0.0043422	0.018487	Slc39a12	chr2	+	14388316	14494977	2675	protein_coding	solute_carrier_family_39_(zinc_transporter)_member_12	85	131	126	63	70	88	100	82	29	70	76	21	45	60	1.58065	1.99782	1.89728	1.11166	1.48859	1.46724	1.42981	1.25802	0.520665	1.13454
ENSMUSG00000074361	4.1819	3.45512	2.55408	6.04411	8.46115	8.58803	4.7777	0.918581	2.20458	0	1.16947	0.957865	4.79591	0.998661	0.46379	0.0044501	0.018837	C5ar2	chr7	-	16234585	16244154	3522	protein_coding	complement_component_5a_receptor_2	4	4	3	6	7	9	6	1	2	0	1	1	4	1	0.0564953	0.0463318	0.0343097	0.0804116	0.11306	0.113972	0.0651574	0.0116522	0.0272725	0
ENSMUSG00000033063	39.7281	49.2355	28.0949	20.147	35.0533	38.169	32.6476	13.7787	23.1481	17.612	17.542	15.3258	28.7755	36.9505	0.46315	0.0060018	0.024118	Cntnap3	chr13	-	64737591	64903888	4868	protein_coding	contactin_associated_protein-like_3	38	57	33	20	29	40	41	15	21	18	15	16	24	37	0.388307	0.477676	0.273054	0.193926	0.338882	0.366482	0.322133	0.126455	0.207183	0.160313
ENSMUSG00000032690	16.7276	22.4583	21.284	8.05881	24.1747	11.4507	23.8885	6.43007	1.10229	7.82754	14.0336	0.957865	17.9847	12.9826	0.46306	0.010265	0.037615	Oas2	chr5	-	120730333	120749853	3961	protein_coding	2'-5'_oligoadenylate_synthetase_2	16	26	25	8	20	12	30	7	1	8	12	1	15	13	0.200936	0.26778	0.254226	0.0953327	0.287228	0.13512	0.28968	0.0725254	0.0121249	0.0875651
ENSMUSG00000023915	765.288	826.638	841.145	849.197	1005.67	896.972	769.21	611.775	503.746	644.794	799.916	404.219	597.091	649.13	0.46253	1.3692e-06	1.4578e-05	Tnfrsf21	chr17	+	43016555	43089188	3626	protein_coding	tumor_necrosis_factor_receptor_superfamily_member_21	732	957	988	843	832	940	966	666	457	659	684	422	498	650	10.0421	10.767	10.9752	10.9738	13.0526	11.5623	10.1895	7.53778	6.05303	7.87959
ENSMUSG00000071176	382.644	380.063	410.356	376.749	418.223	364.514	404.512	262.714	261.242	251.46	287.689	288.317	339.311	278.626	0.46239	1.4921e-12	3.5838e-11	Arhgef10	chr8	+	14911663	15001085	5528	protein_coding	Rho_guanine_nucleotide_exchange_factor_(GEF)_10	366	440	482	374	346	382	508	286	237	257	246	301	283	279	3.29348	3.24708	3.51207	3.19345	3.56049	3.08204	3.51478	2.12322	2.05904	2.01563
ENSMUSG00000085424	3.13643	7.77402	2.55408	5.03676	0	4.77113	11.148	0.918581	1.10229	1.95689	1.16947	0	0	0.998661	0.46138	0.002067	0.0099163	Fhad1os1	chr4	+	141982992	141986797	997	antisense	forkhead-associated_(FHA)_phosphopeptide_binding_domain_1_opposite_strand_1	3	9	3	5	0	5	14	1	1	2	1	0	0	1	0.149681	0.368261	0.121202	0.236718	0	0.223675	0.537075	0.0411625	0.0481714	0.0869722
ENSMUSG00000048347	481.964	490.627	521.884	499.646	431.519	471.387	493.696	293.027	381.392	282.77	357.857	362.073	347.704	410.45	0.46093	2.3557e-10	4.3975e-09	Pcdhb18	chr18	+	37489465	37494503	5039	protein_coding	protocadherin_beta_18	461	568	613	496	357	494	620	319	346	289	306	378	290	411	4.55091	4.59846	4.90005	4.64616	4.03019	4.37246	4.70597	2.59803	3.29774	2.48656
ENSMUSG00000079110	46.0009	38.8701	51.0817	44.3235	36.2621	22.9014	36.6291	11.9416	19.8412	16.6335	25.7283	18.1994	56.352	20.9719	0.4608	0.0083257	0.031544	Capn3	chr2	+	120456019	120504913	3174	protein_coding	calpain_3	44	45	60	44	30	24	46	13	18	17	22	19	47	21	0.689585	0.578382	0.761428	0.654338	0.53767	0.337247	0.55431	0.168087	0.272364	0.232214
ENSMUSG00000072620	34.5007	27.641	22.9867	18.1323	18.131	28.6268	15.9257	17.453	13.2275	22.5042	10.5252	13.4101	14.3877	9.98661	0.46028	0.0075699	0.029123	Slfn2	chr11	+	83065112	83070678	1664	protein_coding	schlafen_2	33	32	27	18	15	30	20	19	12	23	9	14	12	10	0.986512	0.784523	0.653574	0.510594	0.51279	0.804102	0.459704	0.468595	0.346348	0.599267
ENSMUSG00000029378	14.6367	8.6378	12.7704	14.1029	10.8786	12.4049	15.9257	10.1044	3.30687	4.89221	4.67787	10.5365	4.79591	9.98661	0.4591	0.011417	0.040917	Areg	chr5	+	91139615	91148432	1199	protein_coding	amphiregulin	14	10	15	14	9	13	20	11	3	5	4	11	4	10	0.580832	0.340243	0.503914	0.551145	0.426997	0.483579	0.637989	0.376505	0.120167	0.180799
ENSMUSG00000043279	433.872	375.744	406.099	410.999	450.858	454.211	445.123	274.656	212.742	298.425	367.213	257.666	388.469	318.573	0.45853	9.0509e-07	9.931e-06	Trim56	chr5	-	137105644	137116209	9279	protein_coding	tripartite_motif-containing_56	415	435	477	408	373	476	559	299	193	305	314	269	324	319	2.22479	1.91248	2.07063	2.07547	2.2867	2.28796	2.30416	1.32241	0.998943	1.4251
ENSMUSG00000050370	25.0914	15.548	17.0272	8.05881	10.8786	16.2218	18.3145	9.18581	3.30687	11.7413	16.3725	0	9.59182	3.99464	0.45851	0.011175	0.04032	Ch25h	chr19	-	34473786	34475135	1350	protein_coding	cholesterol_25-hydroxylase	24	18	20	8	9	17	23	10	3	12	14	0	8	4	0.88434	0.543936	0.596734	0.279713	0.379236	0.561641	0.651623	0.303993	0.106726	0.385384
ENSMUSG00000045629	38.6826	39.7339	26.3922	19.1397	18.131	37.2148	36.6291	26.6388	27.5572	12.7198	21.0504	17.2416	13.1888	17.9759	0.45789	0.0067969	0.026727	Sh3tc2	chr18	+	61953075	62015715	4536	protein_coding	SH3_domain_and_tetratricopeptide_repeats_2	37	46	31	19	15	39	46	29	25	13	18	18	11	18	0.405761	0.413708	0.275279	0.197714	0.188113	0.383473	0.387871	0.262375	0.264698	0.124256
ENSMUSG00000043099	41.819	33.6874	60.4466	36.2646	59.228	25.7641	49.3696	26.6388	37.4778	28.3748	36.2535	27.7781	26.3775	16.9772	0.45774	0.0042111	0.017986	Hic1	chr11	-	75164565	75169519	3497	protein_coding	hypermethylated_in_cancer_1	40	39	71	36	49	27	62	29	34	29	31	29	22	17	0.568992	0.454965	0.8178	0.485919	0.79708	0.344359	0.678107	0.340329	0.466947	0.359541
ENSMUSG00000014773	462.1	398.203	397.586	405.963	402.509	443.715	365.494	283.842	289.902	305.274	339.145	229.888	276.964	337.547	0.45723	2.1227e-09	3.4733e-08	Dll1	chr17	-	15367354	15376872	3581	protein_coding	delta-like_1_(Drosophila)	442	461	467	403	333	465	459	309	263	312	290	240	231	338	6.13988	5.25177	5.25288	5.31199	5.28982	5.79151	4.90242	3.54121	3.52725	3.77743
ENSMUSG00000046191	683.741	705.709	554.236	587.286	653.926	589.711	598.009	451.942	496.03	484.329	371.891	451.155	347.704	523.298	0.45683	8.7918e-09	1.309e-07	Pcdhb20	chr18	+	37504264	37507658	3395	protein_coding	protocadherin_beta_20	654	817	651	583	541	618	751	492	450	495	318	471	290	524	9.58252	9.81728	7.72371	8.1056	9.06481	8.1188	8.46062	5.94733	6.36586	6.32137
ENSMUSG00000031714	848.926	781.721	726.211	689.028	798.974	670.82	853.616	558.497	546.735	547.928	591.75	506.711	599.489	528.292	0.45679	7.8398e-14	2.1417e-12	Gab1	chr8	-	80764434	80880479	4859	protein_coding	growth_factor_receptor_bound_protein_2-associated_protein_1	812	905	853	684	661	703	1072	608	496	560	506	529	500	529	8.31287	7.5982	7.07109	6.64455	7.73848	6.45285	8.4382	5.13516	4.90252	4.99674
ENSMUSG00000049130	10.4548	11.2291	13.6218	6.04411	14.5048	15.2676	10.3517	1.83716	2.20458	7.82754	10.5252	2.8736	9.59182	6.99063	0.45627	0.012007	0.04264	C5ar1	chr7	-	16246743	16259540	2540	protein_coding	complement_component_5a_receptor_1	10	13	16	6	12	16	13	2	2	8	9	3	8	7	0.195843	0.208794	0.253729	0.1115	0.26875	0.28095	0.195754	0.0323142	0.0378164	0.136553
ENSMUSG00000069833	897.018	862.053	775.59	758.536	728.868	798.686	950.763	571.357	626.1	476.502	549.65	491.385	856.07	483.352	0.45569	5.7288e-05	0.00043587	Ahnak	chr19	+	8989284	9076919	18099	protein_coding	AHNAK_nucleoprotein_(desmoyokin)	858	998	911	753	603	837	1194	622	568	487	470	513	714	484	2.35817	2.24949	2.02744	1.9638	1.89524	2.0626	2.5232	1.41037	1.50723	1.1666
ENSMUSG00000097267	23.0005	13.8205	18.7299	29.2132	19.3398	22.9014	28.6662	12.8601	22.0458	9.78443	5.84734	8.62079	19.1836	15.9786	0.4556	0.0096756	0.035759	1700109K24Rik	chr15	+	77084443	77096314	1045	lincRNA	RIKEN_cDNA_1700109K24_gene	22	16	22	29	16	24	36	14	20	10	5	9	16	16	1.04724	0.624615	0.84799	1.3099	0.870974	1.02433	1.31761	0.549805	0.919175	0.414887
ENSMUSG00000005320	42.8645	32.8237	36.6085	53.3896	36.2621	28.6268	31.0551	16.5345	26.4549	40.1161	19.8809	21.073	27.5765	17.9759	0.45506	0.0047228	0.0198	Fgfr4	chr13	+	55152640	55168759	3324	protein_coding	fibroblast_growth_factor_receptor_4	41	38	43	53	30	30	39	18	24	41	17	22	23	18	0.613571	0.466371	0.521065	0.752613	0.513407	0.402535	0.448751	0.222233	0.346765	0.534772
ENSMUSG00000086772	24.0459	15.548	25.5408	28.2058	32.6359	38.169	29.4625	11.023	11.0229	18.5904	24.5588	18.1994	20.3826	18.9746	0.45464	0.0068865	0.027006	Gm11705	chr11	+	107025681	107025907	110	antisense	predicted_gene_11705	23	18	30	28	27	40	37	12	10	19	21	19	17	19	10.401	6.67558	10.9853	12.015	13.9628	16.2185	12.865	4.47698	4.36608	7.4887
ENSMUSG00000017756	388.917	403.385	435.046	375.742	417.014	333.025	428.401	299.457	263.447	253.417	329.79	249.045	292.551	316.576	0.45448	1.1233e-09	1.9222e-08	Slc12a7	chr13	+	73763697	73816743	5131	protein_coding	solute_carrier_family_12_member_7	372	467	511	373	345	349	538	326	239	259	282	260	244	317	3.60647	3.71299	4.01147	3.43134	3.82489	3.03366	4.01035	2.60743	2.23707	2.18848
ENSMUSG00000031700	393.099	304.051	532.952	519.793	400.091	442.76	351.957	255.366	293.209	338.541	353.179	292.149	293.75	261.649	0.45385	9.0826e-06	8.2789e-05	Gpt2	chr8	+	85492576	85527560	3639	protein_coding	glutamic_pyruvate_transaminase_(alanine_aminotransferase)_2	376	352	626	516	331	464	442	278	266	346	302	305	245	262	5.13982	3.94611	6.9291	6.69305	5.17425	5.68695	4.6456	3.13516	3.51062	4.1223
ENSMUSG00000022244	485.101	444.847	487.83	465.396	528.217	509.556	471.4	343.549	271.163	349.304	370.721	323.759	377.678	408.452	0.45326	1.1368e-10	2.181e-09	Amacr	chr15	+	10981756	10996624	2575	protein_coding	alpha-methylacyl-CoA_racemase	464	515	573	462	437	534	592	374	246	357	317	338	315	409	8.9636	8.15904	8.96318	8.46879	9.65396	9.24927	8.79319	5.96062	4.5882	6.01086
ENSMUSG00000017713	79.4562	69.9662	96.2038	71.5219	67.6892	84.926	82.0172	45.929	48.5007	54.7928	63.1512	60.3455	52.755	62.9156	0.45302	0.00011109	0.00078123	Tha1	chr11	-	117867952	117873481	2686	protein_coding	threonine_aldolase_1	76	81	113	71	56	89	103	50	44	56	54	63	44	63	1.4075	1.23023	1.69456	1.2477	1.186	1.47784	1.46667	0.763943	0.78674	0.903915
ENSMUSG00000019823	104.548	81.1954	92.7984	96.7057	111.204	108.782	67.6841	57.8706	50.7053	46.9652	97.0658	65.1348	70.7397	68.9076	0.45294	0.0005477	0.003151	Mical1	chr10	+	41476314	41487032	3645	protein_coding	microtubule_associated_monooxygenase_calponin_and_LIM_domain_containing_1	100	94	109	96	92	114	85	63	46	48	83	68	59	69	1.36472	1.05206	1.20452	1.24317	1.43579	1.39492	0.891915	0.709316	0.606101	0.570939
ENSMUSG00000038390	4445.36	3915.52	4674.82	4502.86	4373.21	4377.03	4448.04	3302.3	3007.04	3324.75	3033.6	3266.32	3084.97	3345.51	0.45255	7.3714e-30	5.4444e-28	Gpr162	chr6	-	124858444	124863917	2676	protein_coding	G_protein-coupled_receptor_162	4252	4533	5491	4470	3618	4587	5586	3595	2728	3398	2594	3410	2573	3350	79.0404	69.1048	82.6513	78.8457	76.9102	76.4515	79.8393	55.1328	48.9601	55.0533
ENSMUSG00000101698	25.0914	13.8205	10.2163	18.1323	9.66988	21.9472	12.7405	3.67432	16.5343	1.95689	9.35574	14.368	0	4.99331	0.45248	0.011396	0.040864	RP23-229N10.1	chr9	+	88827522	88828425	904	lincRNA	predicted_gene_29562	24	16	12	18	8	23	16	4	15	2	8	15	0	5	1.32064	0.722039	0.534684	0.939855	0.503411	1.13476	0.676945	0.181589	0.796906	0.0959196
ENSMUSG00000030226	31.3643	25.9134	45.9735	31.2279	32.6359	20.993	36.6291	20.2088	24.2503	25.4395	15.2031	20.1152	13.1888	26.9638	0.45226	0.0052855	0.021769	Lmo3	chr6	-	138362918	138581968	3664	protein_coding	LIM_domain_only_3	30	30	54	31	27	22	46	22	22	26	13	21	11	27	0.407294	0.334022	0.59364	0.399358	0.419189	0.2678	0.48018	0.246413	0.288371	0.307655
ENSMUSG00000055471	205.959	231.493	247.746	272.992	265.922	274.817	257.2	155.24	146.604	158.508	228.046	172.416	164.26	226.696	0.45198	3.1139e-06	3.0945e-05	Alk	chr17	-	71869442	72603709	4866	protein_coding	anaplastic_lymphoma_kinase	197	268	291	271	220	288	323	169	133	162	195	180	137	227	2.01389	2.24684	2.40883	2.62878	2.57189	2.63976	2.53882	1.42532	1.3127	1.44341
ENSMUSG00000085501	27.1824	31.9599	27.2436	41.3014	25.3834	38.169	26.2774	25.7203	15.432	20.5473	15.2031	17.2416	19.1836	27.9625	0.45195	0.0046618	0.019584	Gm11772	chr11	-	120235234	120236122	532	antisense	predicted_gene_11772	26	37	32	41	21	40	33	28	14	21	13	18	16	28	2.4311	2.83726	2.42283	3.63772	2.24548	3.35345	2.37249	2.15995	1.26387	1.71141
ENSMUSG00000024197	172.504	149.434	202.624	159.162	195.815	180.349	163.238	109.311	81.5693	115.456	145.014	124.523	143.877	146.803	0.45187	1.8147e-05	0.0001547	Plin3	chr17	-	56278962	56290511	2159	protein_coding	perilipin_3	165	173	238	158	162	189	205	119	74	118	124	130	120	147	3.80166	3.26891	4.44026	3.45431	4.26839	3.90438	3.63164	2.26199	1.64613	2.3696
ENSMUSG00000092035	349.189	316.144	400.991	425.102	386.795	375.965	374.253	251.691	235.89	276.899	293.536	292.149	263.775	282.621	0.45099	2.1559e-10	4.0407e-09	Peg10	chr6	+	4747306	4760517	6667	protein_coding	paternally_expressed_10	334	366	471	422	320	394	470	274	214	283	251	305	220	283	2.49206	2.23954	2.84561	2.98771	2.73037	2.63578	2.69631	1.68662	1.54159	1.84036
ENSMUSG00000022483	1734.44	1264.57	1563.95	1409.28	1550.81	1395.08	1409.42	1108.73	975.525	1208.38	1064.22	1040.24	1025.13	1054.59	0.45098	1.7281e-13	4.5481e-12	Col2a1	chr15	-	97975602	98004695	5104	protein_coding	collagen_type_II_alpha_1	1659	1464	1837	1399	1283	1462	1770	1207	885	1235	910	1086	855	1056	16.1688	11.7014	14.4972	12.9379	14.2994	12.7756	13.2637	9.70496	8.32755	10.4906
ENSMUSG00000029994	133.821	144.251	137.92	129.948	116.039	136.454	116.257	96.451	93.6945	88.0598	80.6932	79.5028	115.102	100.865	0.45047	3.3457e-06	3.3024e-05	Anxa4	chr6	-	86736840	86793584	2623	protein_coding	annexin_A4	128	167	162	129	96	143	146	105	85	90	69	83	96	101	2.42747	2.59733	2.48772	2.32139	2.08197	2.43154	2.12891	1.64281	1.55634	1.48761
ENSMUSG00000078546	116.048	114.019	114.934	99.7278	67.6892	103.056	85.2024	80.8351	83.7739	61.6419	42.1008	77.5871	68.3417	72.9023	0.44979	0.00038029	0.0022923	2210404O09Rik	chr17	-	21879570	21909926	2221	protein_coding	RIKEN_cDNA_2210404O09_gene	111	132	135	99	56	108	107	88	76	63	36	81	57	73	2.48609	2.42457	2.44833	2.10399	1.4343	2.1688	1.84263	1.62604	1.64342	1.22981
ENSMUSG00000039405	88.8655	81.1954	99.6092	79.5808	122.082	114.507	102.721	58.7892	57.319	90.0167	83.0322	65.1348	62.3468	64.913	0.44917	0.00018582	0.0012231	Prss23	chr7	-	89507785	89517586	3226	protein_coding	protease_serine_23	85	94	117	79	101	120	129	64	52	92	71	68	52	65	1.31068	1.1887	1.46085	1.1559	1.78098	1.65905	1.52942	0.814165	0.774147	1.23643
ENSMUSG00000028459	35.5462	22.4583	27.2436	17.125	25.3834	25.7641	29.4625	15.6159	19.8412	14.6766	15.2031	19.1573	21.5816	12.9826	0.44892	0.0061482	0.024606	Cd72	chr4	-	43446462	43454628	2583	protein_coding	CD72_antigen	34	26	32	17	21	27	37	17	18	15	13	20	18	13	0.654781	0.410637	0.499011	0.310657	0.462484	0.466211	0.547872	0.270098	0.334682	0.251775
ENSMUSG00000027339	130.684	155.48	139.623	126.926	131.752	121.187	114.665	101.962	66.1373	90.9952	123.964	82.3764	99.5152	88.8808	0.44888	2.7552e-05	0.00022551	Rassf2	chr2	-	131989415	132030258	8233	protein_coding	Ras_association_(RalGDS/AF-6)_domain_family_member_2	125	180	164	126	109	127	144	111	60	93	106	86	83	89	0.755255	0.891915	0.802362	0.722386	0.75313	0.688001	0.66897	0.553302	0.350008	0.489746
ENSMUSG00000051729	25.0914	16.4118	16.1759	20.147	16.9223	15.2676	35.8328	13.7787	11.0229	9.78443	19.8809	13.4101	10.7908	10.9853	0.44797	0.010848	0.039367	Gm5087	chr14	-	13157388	13284638	1921	protein_coding	predicted_gene_5087	24	19	19	20	14	16	45	15	10	10	17	14	9	11	0.621478	0.403492	0.398392	0.491427	0.414574	0.37148	0.895957	0.32045	0.25001	0.225693
ENSMUSG00000098977	18.8186	21.5945	28.0949	19.1397	18.131	25.7641	31.8514	11.023	12.1252	9.78443	12.8641	25.8624	9.59182	19.9732	0.44797	0.0099521	0.036687	Gm27196	chr2	+	26206702	26209283	2582	antisense	predicted_gene_27196	18	25	33	19	15	27	40	12	11	10	11	27	8	20	0.346783	0.394996	0.514804	0.347339	0.330473	0.466392	0.592524	0.190731	0.204607	0.167915
ENSMUSG00000044279	53.3193	45.7804	40.014	39.2867	49.5582	68.7042	49.3696	27.5574	33.0687	38.1593	33.9145	36.3989	35.9693	31.9572	0.44777	0.0013227	0.0067513	Crb3	chr17	+	57059105	57065918	1206	protein_coding	crumbs_homolog_3_(Drosophila)	51	53	47	39	41	72	62	30	30	39	29	38	30	32	2.10361	1.79282	1.56977	1.52642	1.93392	2.66274	1.96628	1.02087	1.1947	1.40205
ENSMUSG00000036718	104.548	94.1521	59.5953	69.5072	77.3591	85.8803	91.5727	53.2777	61.7282	60.6634	53.7955	62.2613	61.1479	55.925	0.44745	0.00020629	0.0013406	Micall2	chr5	-	139706693	139736336	3349	protein_coding	MICAL-like_2	100	109	70	69	64	90	115	58	56	62	46	65	51	56	1.48534	1.32776	0.841913	0.972502	1.08709	1.19859	1.31336	0.710739	0.803077	0.802643
ENSMUSG00000035237	60.6376	50.963	59.5953	79.5808	48.3494	65.8415	31.0551	30.3132	29.7618	48.9221	45.6092	40.2303	39.5663	30.9585	0.44722	0.0030977	0.013924	Lcat	chr8	-	105939551	105943382	1342	protein_coding	lecithin_cholesterol_acyltransferase	58	59	70	79	40	69	39	33	27	50	39	42	33	31	2.14989	1.79353	2.10102	2.77863	1.69554	2.29319	1.11151	1.00916	0.966264	1.61534
ENSMUSG00000027087	1544.17	1540.12	1635.46	1582.55	1538.72	1642.22	1614.07	965.429	1152.99	1140.86	1167.13	1196.37	1327.27	1154.45	0.44643	1.2303e-18	4.8298e-17	Itgav	chr2	+	83724397	83806916	7054	protein_coding	integrin_alpha_V	1477	1783	1921	1571	1273	1721	2027	1051	1046	1166	998	1249	1107	1156	10.4157	10.3116	10.9692	10.5123	10.2658	10.8815	10.9906	6.11455	7.12165	7.16653
ENSMUSG00000037552	195.504	167.573	221.354	189.382	205.485	187.982	227.737	176.368	117.945	127.198	135.658	120.691	169.056	151.796	0.44624	3.8169e-06	3.7322e-05	Plekhg2	chr7	-	28359604	28372599	5511	protein_coding	pleckstrin_homology_domain_containing_family_G_(with_RhoGef_domain)_member_2	187	194	260	188	170	197	286	192	107	130	116	126	141	152	1.68792	1.43609	1.90032	1.61022	1.75477	1.59433	1.9849	1.42978	0.932476	1.02272
ENSMUSG00000074052	3.13643	2.59134	5.10817	10.0735	10.8786	4.77113	1.59257	1.83716	2.20458	0	1.16947	1.91573	2.39796	0	0.44603	0.0046049	0.019371	BC048644	chr8	+	121907833	121918428	2260	antisense	cDNA_sequence_BC048644	3	3	6	10	9	5	2	2	2	0	1	2	2	0	0.066032	0.0541529	0.106937	0.208857	0.226535	0.0986745	0.0338473	0.0363177	0.0425017	0
ENSMUSG00000085593	5.22738	8.6378	13.6218	11.0809	8.46115	9.54225	15.1294	2.75574	7.71602	1.95689	4.67787	9.57865	5.99489	3.99464	0.44595	0.013892	0.048265	4930589P08Rik	chr4	+	151376470	151379582	1084	antisense	RIKEN_cDNA_4930589P08_gene	5	10	16	11	7	10	19	3	7	2	4	10	5	4	0.229447	0.376339	0.594532	0.478983	0.367342	0.411447	0.670388	0.113577	0.310137	0.079992
ENSMUSG00000028862	54.3647	31.9599	54.4871	52.3823	64.063	46.757	27.8699	22.9645	38.5801	21.5257	25.7283	45.0197	41.9642	17.9759	0.44582	0.0070141	0.027407	Map3k6	chr4	+	133240818	133252929	4334	protein_coding	mitogen-activated_protein_kinase_kinase_kinase_6	52	37	64	52	53	49	35	25	35	22	22	47	35	18	0.596838	0.348275	0.594806	0.566332	0.695646	0.504255	0.308874	0.236727	0.38785	0.220079
ENSMUSG00000085581	18.8186	16.4118	16.1759	36.2646	33.8446	12.4049	32.6476	12.8601	17.6366	8.80598	15.2031	19.1573	14.3877	11.9839	0.4458	0.011924	0.042415	Gm12786	chr4	-	107017935	107022499	644	antisense	predicted_gene_12786	18	19	19	36	28	13	41	14	16	9	13	20	12	12	1.39036	1.20358	1.18837	2.6386	2.47328	0.900328	2.43501	0.892153	1.19321	0.605902
ENSMUSG00000045031	283.324	283.32	238.381	254.86	218.781	255.732	235.7	220.459	189.594	184.926	159.048	170.5	201.428	148.8	0.44555	2.1545e-07	2.6556e-06	Cetn4	chr3	-	37307749	37312708	2981	protein_coding	centrin_4	271	328	280	253	181	268	296	240	172	189	136	178	168	149	4.52219	4.4887	3.78339	4.00604	3.45397	4.00974	3.7978	3.30405	2.77109	2.74882
ENSMUSG00000031639	154.73	131.295	102.163	133.978	140.213	146.951	101.924	86.3466	72.751	90.0167	106.422	81.4186	106.709	100.865	0.44551	5.6929e-05	0.00043384	Tlr3	chr8	-	45395665	45410608	4327	protein_coding	toll-like_receptor_3	148	152	120	133	116	154	128	94	66	92	91	85	89	101	1.70144	1.43306	1.11707	1.45085	1.52501	1.58737	1.13142	0.891534	0.732557	0.921821
ENSMUSG00000000732	51.2283	57.8733	35.7572	43.3161	33.8446	50.5739	43.7956	32.1503	22.0458	33.267	30.4061	28.736	21.5816	44.9397	0.4443	0.0028872	0.013142	Icosl	chr10	+	78069360	78079525	2756	protein_coding	icos_ligand	49	67	42	43	28	53	55	35	20	34	26	30	18	45	0.88442	0.991755	0.613839	0.736454	0.577937	0.857709	0.763283	0.521178	0.348526	0.534867
ENSMUSG00000028654	101.411	104.517	91.947	97.7131	88.2377	74.4296	112.276	75.3236	51.8076	68.491	52.626	60.3455	69.5407	92.8755	0.44399	0.00022953	0.0014623	Mycl	chr4	+	122995652	123002485	3501	protein_coding	v-myc_myelocytomatosis_viral_oncogene_homolog_lung_carcinoma_derived_(avian)	97	121	108	97	73	78	141	82	47	70	45	63	58	93	1.37823	1.40994	1.24256	1.30778	1.18613	0.993678	1.54038	0.961211	0.644748	0.866865
ENSMUSG00000086355	3.13643	3.45512	12.7704	9.06616	4.83494	6.67958	15.9257	4.5929	3.30687	3.91377	3.5084	2.8736	1.19898	3.99464	0.44399	0.011109	0.040151	4933428C19Rik	chr4	-	40482840	40525548	818	lincRNA	RIKEN_cDNA_4933428C19_gene	3	4	15	9	4	7	20	5	3	4	3	3	1	4	0.182436	0.199487	0.738622	0.519333	0.278169	0.38167	0.935145	0.25085	0.176138	0.212008
ENSMUSG00000046834	84.6835	107.973	99.6092	104.765	111.204	92.5598	89.1838	80.8351	74.9556	45.9868	84.2016	72.7978	62.3468	66.9103	0.44346	0.00010126	0.00072298	Krt1	chr15	-	101845428	101850786	2445	protein_coding	keratin_1	81	125	117	104	92	97	112	88	68	47	72	76	52	67	1.64796	2.08564	1.92749	2.00776	2.14048	1.76944	1.75203	1.47707	1.33572	0.833422
ENSMUSG00000050382	50.1828	38.8701	56.1898	57.419	44.7232	32.4437	52.5547	34.9061	34.1709	31.3102	30.4061	25.8624	46.7601	23.9679	0.44336	0.0024949	0.01162	Kif7	chr7	-	79698098	79715720	4577	protein_coding	kinesin_family_member_7	48	45	66	57	37	34	66	38	31	32	26	27	39	24	0.521677	0.401089	0.580828	0.587828	0.459856	0.331315	0.551525	0.340722	0.325286	0.30312
ENSMUSG00000085263	8.36381	5.18268	8.51361	11.0809	3.62621	7.6338	7.16656	2.75574	2.20458	1.95689	1.16947	2.8736	4.79591	6.99063	0.44304	0.012368	0.043713	1700125G02Rik	chr4	-	124890888	124894782	519	antisense	RIKEN_cDNA_1700125G02_gene	8	6	10	11	3	8	9	3	2	2	1	3	4	7	0.766769	0.471621	0.776099	1.00042	0.328818	0.687489	0.66325	0.23722	0.185075	0.167074
ENSMUSG00000037211	309.461	266.044	286.909	255.867	276.8	284.359	293.829	229.645	175.264	192.753	184.776	196.362	220.612	230.691	0.44261	2.3662e-09	3.8481e-08	Spry1	chr3	+	37639947	37644598	2773	protein_coding	sprouty_homolog_1_(Drosophila)	296	308	337	254	229	298	369	250	159	197	158	205	184	231	5.30987	4.53116	4.89513	4.32355	4.69772	4.79303	5.08954	3.69988	2.7538	3.08008
ENSMUSG00000058135	512.283	583.052	487.83	452.301	529.426	537.229	528.733	403.257	253.526	338.541	447.906	276.823	1751.71	415.443	0.44232	1.2335e-05	0.00010867	Gstm1	chr3	-	108012255	108017973	1289	protein_coding	glutathione_S-transferase_mu_1	490	675	573	449	438	563	664	439	230	346	383	289	1461	416	18.9097	21.3629	17.9055	16.4418	19.3296	19.4804	19.7023	13.9768	8.56958	11.6377
ENSMUSG00000097662	19.864	19.0032	21.284	27.1985	18.131	12.4049	11.9443	12.8601	12.1252	9.78443	14.0336	12.4523	3.59693	12.9826	0.44089	0.012837	0.045064	Gm2093	chr15	+	3996039	4015858	3526	lincRNA	predicted_gene_2093	19	22	25	27	15	13	15	14	11	10	12	13	3	13	0.268048	0.254536	0.28559	0.361442	0.241997	0.164439	0.162709	0.162946	0.149829	0.12296
ENSMUSG00000040183	1015.16	1055.54	1159.55	1078.87	911.387	978.081	986.596	735.783	757.272	681.974	804.593	774.913	770.943	743.004	0.44061	5.4096e-17	1.8894e-15	Ankrd6	chr4	-	32804035	32950841	4683	protein_coding	ankyrin_repeat_domain_6	971	1222	1362	1071	754	1025	1239	801	687	697	688	809	643	744	10.3142	10.6453	11.7149	10.795	9.15901	9.7621	10.1193	7.01949	7.04558	6.45289
ENSMUSG00000029204	6.27286	10.3654	10.2163	3.02205	10.8786	3.8169	3.18514	1.83716	3.30687	1.95689	7.0168	0.957865	1.19898	0	0.4402	0.0080368	0.030673	Rhoh	chr5	+	65863569	65896700	4960	protein_coding	ras_homolog_gene_family_member_H	6	12	12	3	9	4	4	2	3	2	6	1	1	0	0.0601743	0.098698	0.0974505	0.0285493	0.10322	0.0359684	0.0308447	0.016548	0.0290485	0.0174821
ENSMUSG00000024664	534.238	611.557	564.452	521.808	563.271	564.901	628.268	460.209	374.778	406.054	440.889	341.958	471.198	418.439	0.43988	6.8409e-11	1.357e-09	Fads3	chr19	+	10041548	10059671	3269	protein_coding	fatty_acid_desaturase_3	511	708	663	518	466	592	789	501	340	415	377	357	393	419	7.77585	8.83542	8.16927	7.47948	8.10909	8.077	9.23133	6.28955	4.99515	5.50401
ENSMUSG00000085008	112.911	72.5576	148.137	116.853	85.8202	145.996	110.683	83.5909	84.8762	59.685	76.0154	117.817	70.7397	50.9317	0.43945	0.0022267	0.010547	Dbhos	chr2	-	27144898	27162703	4020	antisense	dopamine_beta_hydroxylase_opposite_strand	108	84	174	116	71	153	139	91	77	61	65	123	59	51	1.33641	0.852437	1.74344	1.36204	1.00469	1.6975	1.32249	0.928993	0.919918	0.657884
ENSMUSG00000006143	30.3188	33.6874	22.9867	17.125	14.5048	27.6725	21.4997	8.26723	6.61373	9.78443	11.6947	18.1994	29.9744	16.9772	0.43922	0.014008	0.048608	Upk3bl	chr5	+	136054492	136064326	1119	protein_coding	uroplakin_3B-like	29	39	27	17	12	29	27	9	6	10	10	19	25	17	1.28917	1.42182	0.971892	0.717093	0.610032	1.15588	0.92286	0.330073	0.257517	0.38745
ENSMUSG00000032554	10.4548	8.6378	6.81089	6.04411	12.0874	21.9472	4.7777	1.83716	3.30687	2.93533	5.84734	10.5365	4.79591	0.998661	0.4387	0.012547	0.044246	Trf	chr9	-	103204001	103230444	2571	protein_coding	transferrin	10	10	8	6	10	23	6	2	3	3	5	11	4	1	0.193482	0.158674	0.125335	0.110155	0.221258	0.398997	0.0892588	0.0319246	0.0560407	0.05059
ENSMUSG00000036218	46.0009	82.9229	74.0684	51.3749	59.228	72.5211	76.4433	29.3946	46.2961	52.8359	47.9482	39.2725	61.1479	45.9384	0.43815	0.0018146	0.0088622	Pdzrn4	chr15	+	92396915	92771819	3851	protein_coding	PDZ_domain_containing_RING_finger_4	44	96	87	51	49	76	96	32	42	54	41	41	51	46	0.568357	1.01697	0.909977	0.625105	0.723809	0.880204	0.953454	0.341015	0.523794	0.607947
ENSMUSG00000002083	122.321	126.112	138.772	109.801	145.048	109.736	131.387	109.311	90.3877	87.0814	81.8627	62.2613	87.5254	110.851	0.43775	6.0389e-05	0.0004563	Bbc3	chr7	+	16309616	16318205	1814	protein_coding	BCL2_binding_component_3	117	146	163	109	120	115	165	119	82	89	70	65	73	111	3.20841	3.2834	3.61939	2.83626	3.7631	2.82751	3.47895	2.6922	2.17101	2.12715
ENSMUSG00000027953	375.326	352.422	435.897	378.764	386.795	381.69	423.623	273.737	278.879	266.136	294.706	286.402	329.719	275.63	0.43762	1.7167e-11	3.6703e-10	Slc50a1	chr3	-	89268246	89270570	1332	protein_coding	solute_carrier_family_50_(sugar_transporter)_member_1	359	408	512	376	320	400	532	298	253	272	252	299	275	276	13.407	12.4958	15.4828	13.3242	13.6662	13.3937	15.276	9.1814	9.12222	8.85341
ENSMUSG00000026289	2503.91	2419.45	2879.3	2974.71	2645.92	2714.77	2330.72	1984.13	1956.56	1972.54	1998.62	1937.76	1896.78	1806.58	0.43738	4.498e-18	1.7083e-16	Atg16l1	chr1	+	87755870	87792428	3751	protein_coding	autophagy_related_16-like_1_(S._cerevisiae)	2395	2801	3382	2953	2189	2845	2927	2160	1775	2016	1709	2023	1582	1809	31.7614	30.4632	36.3171	37.1598	33.1971	33.8282	29.8454	23.6322	22.7267	23.3018
ENSMUSG00000024085	185.049	172.756	172.826	184.345	177.684	193.708	195.09	146.054	145.502	134.047	123.964	110.155	154.668	116.843	0.43737	2.3212e-07	2.848e-06	Man2a1	chr17	+	64600736	64755110	6991	protein_coding	mannosidase_2_alpha_1	177	200	203	183	147	203	245	159	132	137	106	115	129	117	1.25943	1.16708	1.16961	1.23557	1.19613	1.29509	1.34038	0.933372	0.906816	0.849624
ENSMUSG00000068686	20.9095	19.867	28.9463	19.1397	33.8446	39.1232	23.0922	14.6973	8.81831	16.6335	26.8977	14.368	11.9898	22.9692	0.43726	0.011194	0.04037	Cd59b	chr2	+	104069849	104091187	796	protein_coding	CD59b_antigen	20	23	34	19	28	41	29	16	8	17	23	15	10	23	1.24985	1.17876	1.72048	1.12667	2.001	2.29728	1.39344	0.824905	0.482682	0.925937
ENSMUSG00000003746	424.463	489.764	396.734	454.315	435.145	437.989	498.474	309.562	335.096	317.015	333.298	328.548	346.505	332.554	0.43682	7.5676e-13	1.8655e-11	Man1a	chr10	-	53904788	54075796	5134	protein_coding	mannosidase_1_alpha	406	567	466	451	360	459	626	337	304	324	285	343	289	333	3.9338	4.50543	3.65607	4.14646	3.98885	3.9875	4.66359	2.69384	2.84382	2.73612
ENSMUSG00000036944	43.91	46.6441	31.5004	35.2573	32.6359	42.9401	36.6291	23.8831	18.7389	28.3748	25.7283	34.4832	26.3775	25.9652	0.43665	0.0030965	0.013922	Tmem71	chr15	-	66526212	66561046	2931	protein_coding	transmembrane_protein_71	42	54	37	35	27	45	46	26	17	29	22	36	22	26	0.712812	0.7516	0.508476	0.563649	0.524022	0.684763	0.600266	0.364045	0.278559	0.428971
ENSMUSG00000043822	507.056	454.349	446.113	546.992	441.189	446.577	373.457	300.376	378.085	326.8	321.603	357.284	326.122	331.555	0.43602	4.4143e-09	6.9083e-08	Adamtsl5	chr10	-	80339110	80348412	4104	protein_coding	ADAMTS-like_5	485	526	524	543	365	468	469	327	343	334	275	373	272	332	5.87863	5.22862	5.1429	6.24524	5.05926	5.08606	4.37087	3.26992	4.01394	3.52846
ENSMUSG00000028164	182.958	163.255	146.434	155.132	165.597	155.539	185.534	112.067	83.7739	140.896	162.556	104.407	116.301	108.854	0.43537	4.0309e-05	0.00031714	Manba	chr3	+	135485611	135571404	3675	protein_coding	mannosidase_beta_A_lysosomal	175	189	172	154	137	163	233	122	76	144	139	109	97	109	2.36877	2.09804	1.88519	1.97797	2.12063	1.97822	2.42494	1.36238	0.993209	1.69883
ENSMUSG00000063804	35.5462	24.1859	24.6895	28.2058	39.8883	24.8099	27.8699	13.7787	20.9435	16.6335	17.542	22.9888	16.7857	25.9652	0.43453	0.0068239	0.026811	Lin28b	chr10	-	45376620	45470201	5402	protein_coding	lin-28_homolog_B_(C._elegans)	34	28	29	28	33	26	35	15	19	17	15	24	14	26	0.313088	0.211452	0.216236	0.244658	0.347505	0.214665	0.247808	0.113955	0.168921	0.136439
ENSMUSG00000033350	1980.13	1971.15	2019.43	2099.32	2046.39	1940.89	1917.45	1464.22	1387.78	1609.54	1472.36	1298.87	1447.17	1608.84	0.4342	7.6163e-22	3.5758e-20	Chst2	chr9	-	95399292	95406722	7328	protein_coding	carbohydrate_sulfotransferase_2	1894	2282	2372	2084	1693	2034	2408	1594	1259	1645	1259	1356	1207	1611	12.8569	12.704	13.0381	13.4236	13.1423	12.3797	12.5682	8.92688	8.25134	9.73254
ENSMUSG00000034330	52.2738	55.2819	47.6762	46.3382	49.5582	42.9401	52.5547	34.9061	33.0687	25.4395	39.7619	39.2725	41.9642	28.9612	0.43407	0.0012365	0.0063667	Plcg2	chr8	+	117498291	117635140	4296	protein_coding	phospholipase_C_gamma_2	50	64	56	46	41	45	66	38	30	26	34	41	35	29	0.578959	0.607749	0.525059	0.505417	0.542901	0.467188	0.5876	0.363008	0.335383	0.262395
ENSMUSG00000071719	250.914	258.27	290.314	263.926	313.063	261.458	252.422	230.564	189.594	193.732	164.895	188.699	191.836	212.715	0.43403	1.7252e-08	2.476e-07	Tmem28	chrX	+	99821021	99848790	3909	protein_coding	transmembrane_protein_28	240	299	341	262	259	274	317	251	172	198	141	197	160	213	3.05413	3.12043	3.51377	3.16368	3.76908	3.12628	3.10167	2.63515	2.11323	2.19607
ENSMUSG00000023045	4.1819	8.6378	5.95953	4.02941	2.41747	3.8169	7.96284	0	0	1.95689	2.33893	2.8736	0	3.99464	0.43396	0.0071942	0.027971	Soat2	chr15	+	102150526	102163474	2213	protein_coding	sterol_O-acyltransferase_2	4	10	7	4	2	4	10	0	0	2	2	3	0	4	0.0899126	0.184343	0.127409	0.0853169	0.0514103	0.0806161	0.172831	0	0	0.0391827
ENSMUSG00000028255	353.371	318.735	335.436	308.25	308.228	354.972	245.255	211.274	252.424	257.33	238.571	211.688	203.826	241.676	0.43388	1.1712e-07	1.499e-06	Clca3	chr3	-	145004537	145032776	2935	protein_coding	chloride_channel_calcium_activated_3	338	369	394	306	255	372	308	230	229	263	204	221	170	242	5.72862	5.12893	5.4072	4.92119	4.94235	5.65299	4.0137	3.21601	3.74724	3.88502
ENSMUSG00000048537	496.601	423.252	492.087	520.801	512.504	407.454	474.585	281.086	271.163	348.326	350.84	311.306	504.77	336.549	0.43384	9.4838e-06	8.5901e-05	Phldb1	chr9	-	44686304	44735198	5600	protein_coding	pleckstrin_homology-like_domain_family_B_member_1	475	490	578	517	424	427	596	306	246	356	300	325	421	337	4.21937	3.56958	4.15742	4.35772	4.30704	3.40082	4.07062	2.24249	2.10975	2.75618
ENSMUSG00000055494	38.6826	37.1426	27.2436	24.1764	26.5922	35.3063	40.6105	14.6973	28.6595	27.3964	35.084	17.2416	14.3877	13.9813	0.43308	0.0091303	0.034142	Gm14168	chr2	+	156571792	156577457	2197	lincRNA	predicted_gene_14168	37	43	32	24	22	37	51	16	26	28	30	18	12	14	0.837748	0.798449	0.586684	0.51563	0.569631	0.75113	0.887855	0.298873	0.568366	0.552553
ENSMUSG00000031841	396.235	458.667	436.748	379.771	397.674	410.317	445.919	294.864	245.81	328.757	357.857	308.433	282.959	324.565	0.43295	1.2943e-09	2.1927e-08	Cdh13	chr8	+	118283733	119324921	4565	protein_coding	cadherin_13	379	531	513	377	329	430	560	321	223	336	306	322	236	325	4.12991	4.74529	4.52649	3.89814	4.09974	4.20118	4.69191	2.88577	2.34611	3.19113
ENSMUSG00000024014	87.82	84.6505	112.38	104.765	90.6552	91.6056	112.276	77.1608	68.3419	68.491	61.9818	79.5028	77.9336	57.9223	0.4327	7.3582e-05	0.00054497	Pim1	chr17	+	29490812	29496111	2638	protein_coding	proviral_integration_site_1	84	98	132	104	75	96	141	84	62	70	53	83	65	58	1.58397	1.51551	2.0155	1.86087	1.61729	1.62308	2.04431	1.30678	1.12876	1.15045
ENSMUSG00000076617	41.819	35.415	29.7976	15.1103	30.2184	31.4894	35.8328	22.9645	16.5343	25.4395	17.542	6.70506	20.3826	29.9598	0.43248	0.012031	0.04269	Ighm	chr12	-	113418950	113422730	1424	IG_C_gene	immunoglobulin_heavy_constant_mu	40	41	35	15	25	33	45	25	15	26	15	7	17	30	1.39731	1.17458	0.990017	0.497208	0.998692	1.03359	1.20866	0.720488	0.505901	0.791606
ENSMUSG00000042359	2744.37	2824.56	2508.96	2356.19	2384.84	2605.99	2685.87	1880.34	1986.32	1846.32	1851.27	1963.62	1877.6	1969.36	0.4318	8.0235e-24	4.2314e-22	Osbpl6	chr2	+	76406508	76600647	8257	protein_coding	oxysterol_binding_protein-like_6	2625	3270	2947	2339	1973	2731	3373	2047	1802	1887	1583	2050	1566	1972	15.8143	16.156	14.3761	13.371	13.5927	14.7517	15.6241	10.174	10.4813	9.90821
ENSMUSG00000058715	60.6376	69.9662	75.7711	68.4999	77.3591	69.6584	42.203	45.0105	30.8641	54.7928	39.7619	46.9354	39.5663	62.9156	0.43141	0.0019079	0.0092529	Fcer1g	chr1	-	171229572	171234365	674	protein_coding	Fc_receptor_IgE_high_affinity_I_gamma_polypeptide	58	81	89	68	64	73	53	49	28	56	34	49	33	63	4.28065	4.90268	5.31881	4.76218	5.40159	4.83066	3.00759	2.98355	1.99518	3.60225
ENSMUSG00000091155	61.6831	59.6009	66.4062	56.4117	39.8883	45.8028	80.4247	28.476	36.3755	36.2024	29.2367	48.8511	45.5612	57.9223	0.43117	0.0036426	0.015903	Serpine3	chr14	+	62663667	62692243	1402	protein_coding	serpin_peptidase_inhibitor_clade_E_(nexin_plasminogen_activator_inhibitor_type_1)_member_3	59	69	78	56	33	48	101	31	33	37	25	51	38	58	2.09337	2.00775	2.24094	1.88537	1.33896	1.52699	2.75534	0.907425	1.13045	1.14419
ENSMUSG00000054889	0	2.59134	20.4327	13.0956	15.7136	10.4965	5.57399	5.51149	4.40915	0.978443	3.5084	0.957865	3.59693	0	0.43094	0.0063704	0.025368	Dsp	chr13	+	38151328	38198577	9538	protein_coding	desmoplakin	0	3	24	13	13	11	7	6	4	1	3	1	3	0	0	0.0128314	0.101353	0.0643343	0.0775331	0.0514374	0.02807	0.0258161	0.0201413	0.00454557
ENSMUSG00000022949	73.1833	122.657	174.529	160.169	149.883	180.349	122.628	74.4051	58.4213	103.715	163.725	59.3877	83.9284	88.8808	0.4306	0.011574	0.041416	Clic6	chr16	+	92485736	92541243	3758	protein_coding	chloride_intracellular_channel_6	70	142	205	159	124	189	154	81	53	106	140	62	70	89	0.92658	1.54149	2.19726	1.99709	1.87701	2.2431	1.56735	0.884556	0.677335	1.22291
ENSMUSG00000026480	48.0919	35.415	33.2031	49.3602	33.8446	41.0317	35.8328	26.6388	15.432	17.612	30.4061	23.9466	43.1632	29.9598	0.43041	0.0060087	0.024141	Ncf2	chr1	+	152800194	152836991	4661	protein_coding	neutrophil_cytosolic_factor_2	46	41	39	49	28	43	45	29	14	18	26	25	36	30	0.490931	0.358851	0.337031	0.496219	0.341728	0.411465	0.369263	0.255338	0.144256	0.167432
ENSMUSG00000040345	5.22738	6.04646	4.25681	11.0809	7.25241	6.67958	4.7777	0.918581	2.20458	3.91377	7.0168	0	2.39796	0.998661	0.43025	0.011336	0.040733	Arhgap9	chr10	+	127323727	127329943	1811	protein_coding	Rho_GTPase_activating_protein_9	5	7	5	11	6	7	6	1	2	4	6	0	2	1	0.137339	0.157684	0.111208	0.286702	0.188466	0.172394	0.126717	0.022661	0.0530391	0.0957607
ENSMUSG00000032602	319.916	344.648	355.869	357.61	392.839	367.377	284.273	236.994	240.299	232.869	261.961	264.371	282.959	253.66	0.43019	3.1216e-09	4.9941e-08	Slc25a20	chr9	+	108662098	108684641	1783	protein_coding	solute_carrier_family_25_(mitochondrial_carnitine/acylcarnitine_translocase)_member_20	306	399	418	355	325	385	357	258	218	238	224	276	236	254	8.53713	9.12915	9.44299	9.39796	10.3689	9.63059	7.65806	5.93834	5.87205	5.78724
ENSMUSG00000090523	32.4098	28.5048	36.6085	16.1176	16.9223	29.581	23.0922	16.5345	8.81831	19.5689	22.2199	12.4523	16.7857	21.9705	0.43008	0.011789	0.042034	Gypc	chr18	-	32528322	32560034	2180	protein_coding	glycophorin_C	31	33	43	16	14	31	29	18	8	20	19	13	14	22	0.707371	0.617542	0.794505	0.346434	0.36532	0.634233	0.508796	0.338854	0.176245	0.397758
ENSMUSG00000007379	40.7736	25.0496	40.8653	16.1176	31.4271	40.0775	36.6291	21.1274	27.5572	19.5689	23.3893	20.1152	23.9796	18.9746	0.42863	0.007915	0.03027	Dennd2c	chr3	+	103102604	103169769	4979	protein_coding	DENN/MADD_domain_containing_2C	39	29	48	16	26	42	46	23	25	20	20	21	20	19	0.389641	0.23761	0.388315	0.151682	0.297052	0.376227	0.35336	0.189576	0.241147	0.174154
ENSMUSG00000035805	2447.46	2644.03	2590.69	2447.86	2780.09	2626.03	2400	1926.26	1689.81	2057.66	1850.1	1843.89	1893.19	1999.32	0.42809	9.6256e-22	4.4854e-20	Mlc1	chr15	-	88955884	88979007	2801	protein_coding	megalencephalic_leukoencephalopathy_with_subcortical_cysts_1_homolog_(human)	2341	3061	3043	2430	2300	2752	3014	2097	1533	2103	1582	1925	1579	2002	41.5748	44.582	43.7596	40.9496	46.7107	43.8206	41.1559	30.7243	26.2853	32.5516
ENSMUSG00000018581	77.3652	94.1521	96.2038	96.7057	76.1503	109.736	108.295	63.3821	77.1602	71.4263	65.4902	83.3343	69.5407	39.9464	0.42779	0.00051444	0.0029909	Dnah11	chr12	-	117877982	118199043	14072	protein_coding	dynein_axonemal_heavy_chain_11	74	109	113	96	63	115	136	69	70	73	56	87	58	40	0.261588	0.315995	0.32345	0.322012	0.254675	0.36449	0.369645	0.201229	0.238906	0.224912
ENSMUSG00000097416	169.367	107.109	170.272	158.154	125.709	133.592	132.979	103.8	99.206	100.78	105.252	97.7023	103.112	110.851	0.42769	2.7747e-05	0.0002268	Gm26670	chr1	-	191986832	191990138	3286	antisense	predicted_gene_26670	162	124	200	157	104	140	167	113	90	103	90	102	86	111	2.45239	1.53944	2.45159	2.25522	1.80039	1.90022	1.9438	1.41126	1.3154	1.35899
ENSMUSG00000032754	143.23	156.344	212.84	174.272	176.475	185.12	167.22	102.881	80.4671	140.896	129.811	128.354	165.459	126.83	0.42752	0.00013499	0.0009236	Slc8b1	chr5	+	120511168	120534024	2898	protein_coding	solute_carrier_family_8_(sodium/lithium/calcium_exchanger)_member_B1	137	181	250	173	146	194	210	112	73	144	111	134	138	127	2.3516	2.54794	3.47477	2.81776	2.86587	2.9857	2.77155	1.58605	1.20979	2.15432
ENSMUSG00000049521	291.688	269.5	315.004	268.963	317.897	272.908	344.791	236.994	178.571	206.451	191.793	194.447	260.178	250.664	0.42734	7.3406e-07	8.1599e-06	Cdc42ep1	chr15	+	78842647	78850902	2542	protein_coding	CDC42_effector_protein_(Rho_GTPase_binding)_1	279	312	370	267	263	286	433	258	162	211	164	203	217	251	5.45972	5.00712	5.86288	4.95784	5.88548	5.01804	6.515	4.16525	3.06072	3.59876
ENSMUSG00000052310	928.383	875.873	1099.96	952.954	956.11	917.01	816.987	701.796	585.315	696.651	712.206	685.832	785.33	655.122	0.42724	2.6409e-11	5.5076e-10	Slc39a1	chr3	+	90248172	90253612	2364	protein_coding	solute_carrier_family_39_(zinc_transporter)_member_1	888	1014	1292	946	791	961	1026	764	531	712	609	716	655	656	18.6856	17.4984	22.014	18.8886	19.034	18.1309	16.5998	13.263	10.7878	13.058
ENSMUSG00000038213	194.459	233.221	234.976	196.434	186.145	180.349	199.071	149.729	158.73	125.241	171.912	156.132	145.076	137.815	0.42704	7.2524e-07	8.0762e-06	Tapbpl	chr6	-	125223933	125231860	2352	protein_coding	TAP_binding_protein-like	186	270	276	195	154	189	250	163	144	128	147	163	121	138	3.93385	4.68312	4.72668	3.9134	3.72464	3.584	4.06541	2.84412	2.94042	2.35949
ENSMUSG00000040312	70.0469	56.1457	66.4062	63.4631	65.2717	69.6584	71.6656	32.1503	44.0915	51.8575	44.4398	38.3146	64.7448	53.9277	0.42631	0.00088219	0.0047782	Cchcr1	chr17	+	35517100	35531015	3054	protein_coding	coiled-coil_alpha-helical_rod_protein_1	67	65	78	63	54	73	90	35	40	53	38	40	54	54	1.09131	0.868267	1.02875	0.973707	1.00583	1.0661	1.12713	0.470323	0.629036	0.752407
ENSMUSG00000028980	198.64	240.131	234.976	231.691	261.087	233.785	198.275	163.507	158.73	173.184	185.945	120.691	193.035	172.768	0.42506	2.307e-06	2.3502e-05	H6pd	chr4	-	149979475	150009023	4745	protein_coding	hexose-6-phosphate_dehydrogenase_(glucose_1-dehydrogenase)	190	278	276	230	216	245	249	178	144	177	159	126	161	173	1.99186	2.39011	2.34292	2.28796	2.58952	2.30289	2.00708	1.5395	1.45751	1.61727
ENSMUSG00000097823	456.873	427.571	452.924	449.279	447.232	490.472	508.825	315.073	361.551	348.326	349.671	341	309.336	366.509	0.42456	5.5256e-13	1.3822e-11	Gm16701	chr1	-	166974024	167000841	1529	lincRNA	predicted_gene_16701	437	495	532	446	370	514	639	343	328	356	299	356	258	367	14.2173	13.2071	14.0149	13.7684	13.7656	14.9934	15.9844	9.20627	10.3027	10.0946
ENSMUSG00000006800	1883.95	1863.17	1906.2	1993.55	2056.06	1925.63	1914.27	1300.71	1289.68	1467.66	1592.81	1484.69	1473.54	1437.07	0.4243	3.503e-21	1.5926e-19	Sulf2	chr2	-	166073089	166155663	4580	protein_coding	sulfatase_2	1802	2157	2239	1979	1701	2018	2404	1416	1170	1500	1362	1550	1229	1439	19.5718	19.2129	19.6912	20.3956	21.1271	19.6516	20.0757	12.688	12.2689	14.1994
ENSMUSG00000021835	96.1838	79.4678	103.015	57.419	88.2377	104.011	70.073	53.2777	33.0687	62.6203	90.049	17.2416	71.9387	66.9103	0.42413	0.010724	0.038986	Bmp4	chr14	-	46383520	46390669	2064	protein_coding	bone_morphogenetic_protein_4	92	92	121	57	73	109	88	58	30	64	77	18	60	67	2.21728	1.81839	2.36135	1.30353	2.01194	2.35538	1.6307	1.15323	0.698065	1.34436
ENSMUSG00000038816	593.83	569.231	559.344	631.609	534.261	554.405	614.731	416.117	426.586	428.558	413.991	384.104	545.535	385.483	0.4235	3.4777e-10	6.3898e-09	Ctnnal1	chr4	-	56810935	56865188	3795	protein_coding	catenin_(cadherin_associated_protein)_alpha-like_1	568	659	657	627	442	581	772	453	387	438	354	401	455	386	7.44523	7.08406	6.9733	7.79852	6.6254	6.82822	7.7805	4.89873	4.8976	5.00389
ENSMUSG00000029570	336.643	340.329	422.275	439.205	396.465	336.841	358.328	248.017	276.674	217.214	214.012	224.141	452.015	258.653	0.42294	0.00029371	0.0018218	Lfng	chr5	+	140607341	140615543	2282	protein_coding	LFNG_O-fucosylpeptide_3-beta-N-acetylglucosaminyltransferase	322	394	496	436	328	353	450	270	251	222	183	234	377	259	7.01911	7.04352	8.75489	9.01836	8.17635	6.89926	7.54222	4.85562	5.28254	4.21777
ENSMUSG00000037031	662.832	644.38	753.455	738.389	738.537	659.37	736.563	471.232	473.984	523.467	481.82	570.888	586.3	542.273	0.4228	1.9661e-12	4.6505e-11	Tspan15	chr10	-	62185396	62231218	3605	protein_coding	tetraspanin_15	634	746	885	733	611	691	925	513	430	535	412	596	489	543	8.74834	8.44194	9.88832	9.59744	9.64134	8.54902	9.81383	5.83995	5.72859	6.4342
ENSMUSG00000009687	47.0464	56.1457	73.2171	50.3676	68.8979	49.6197	49.3696	45.0105	30.8641	36.2024	36.2535	33.5253	56.352	38.9478	0.4219	0.002321	0.010908	Fxyd5	chr7	-	31032722	31042481	2998	protein_coding	FXYD_domain-containing_ion_transport_regulator_5	45	65	86	50	57	52	62	49	28	37	31	35	47	39	0.74666	0.884485	1.15545	0.787218	1.08154	0.773597	0.790974	0.670751	0.44855	0.535076
ENSMUSG00000009614	221.641	184.849	153.245	163.191	181.31	131.683	203.052	140.543	117.945	141.874	121.625	85.25	145.076	140.811	0.42174	0.00018212	0.0012032	Sardh	chr2	-	27188393	27248337	4521	protein_coding	sarcosine_dehydrogenase	212	214	180	162	150	138	255	153	107	145	104	89	121	141	2.33262	1.93103	1.6037	1.69136	1.88737	1.36141	2.15729	1.38885	1.13667	1.39053
ENSMUSG00000028076	74.2288	78.604	68.9602	82.6028	93.0726	84.926	74.8507	67.0564	63.9327	54.7928	36.2535	53.6405	69.5407	51.9304	0.42147	0.00044779	0.0026463	Cd1d1	chr3	-	86995834	86999441	1946	protein_coding	CD1d1_antigen	71	91	81	82	77	89	94	73	58	56	31	56	58	52	1.81492	1.90769	1.67659	1.98897	2.25086	2.03981	1.84751	1.53949	1.43143	1.24764
ENSMUSG00000085260	76.3197	82.9229	66.4062	69.5072	56.8106	89.6972	88.3875	58.7892	51.8076	40.1161	43.2703	66.0927	50.3571	66.9103	0.42065	0.00098927	0.0052546	Med9os	chr11	-	59946889	59948142	527	antisense	mediator_complex_subunit_9_opposite_strand	73	96	78	69	47	94	111	64	47	41	37	69	42	67	6.89055	7.43138	5.96168	6.18009	5.07328	7.95537	8.05591	4.98387	4.28323	3.37302
ENSMUSG00000020027	285.415	319.599	320.963	308.25	264.713	298.672	338.421	219.541	259.038	244.611	219.86	218.393	193.035	225.697	0.42046	5.8052e-09	8.906e-08	Socs2	chr10	-	95385362	95417180	4242	protein_coding	suppressor_of_cytokine_signaling_2	273	370	377	306	219	313	425	239	235	250	188	228	161	226	3.20135	3.55828	3.57977	3.40492	2.9368	3.29092	3.83195	2.31219	2.66061	2.55514
ENSMUSG00000100706	69.0014	38.0063	44.2708	44.3235	41.097	31.4894	38.2216	25.7203	29.7618	31.3102	28.0672	35.441	33.5714	26.9638	0.4204	0.0047617	0.019935	RP23-61B8.2	chr8	+	48843665	48869901	4533	processed_transcript	predicted_gene_19744	66	44	52	44	34	33	48	28	27	32	24	37	28	27	0.724269	0.395982	0.462064	0.458167	0.426672	0.324692	0.405002	0.253495	0.286064	0.306062
ENSMUSG00000016256	671.196	663.383	769.63	744.433	809.853	723.303	652.953	473.069	507.053	524.445	603.445	462.649	552.729	600.195	0.42021	3.7527e-10	6.8613e-09	Ctsz	chr2	-	174427493	174439039	1441	protein_coding	cathepsin_Z	642	768	904	739	670	758	820	515	460	536	516	483	461	601	22.1622	21.7423	25.2691	24.2068	26.4492	23.4611	21.7647	14.667	15.3313	16.1267
ENSMUSG00000006435	3101.93	2712.27	3473.55	3697.99	3597.2	3150.85	2795.75	2328.6	2281.74	2598.74	2474.59	2377.42	2330.81	2289.93	0.4201	9.9719e-12	2.1768e-10	Neurl1a	chr19	+	47178820	47259440	4157	protein_coding	neuralized_homolog_1A_(Drosophila)	2967	3140	4080	3671	2976	3302	3511	2535	2070	2656	2116	2482	1944	2293	35.5042	30.8147	39.5334	41.6832	40.7244	35.4275	32.3037	25.0262	23.9152	27.7009
ENSMUSG00000032440	236.278	244.45	246.043	256.875	253.834	232.831	239.681	191.983	139.991	192.753	195.301	166.669	182.245	190.744	0.41953	1.891e-08	2.6973e-07	Tgfbr2	chr9	-	116087698	116175363	4785	protein_coding	transforming_growth_factor_beta_receptor_II	226	283	289	255	210	244	301	209	127	197	167	174	152	191	2.34946	2.41276	2.43277	2.51545	2.49654	2.27432	2.40595	1.79251	1.27469	1.78497
ENSMUSG00000038587	1353.89	1478.79	1609.92	1479.8	1558.06	1594.51	1461.98	1060.04	1078.04	1126.19	1192.86	1152.31	992.754	1229.35	0.41938	6.8623e-17	2.3571e-15	Akap12	chr10	+	4266329	4359468	6244	protein_coding	A_kinase_(PRKA)_anchor_protein_(gravin)_12	1295	1712	1891	1469	1289	1671	1836	1154	978	1151	1020	1203	828	1231	10.3169	11.1854	12.1987	11.1049	11.7433	11.9359	11.2464	7.58473	7.52247	7.99205
ENSMUSG00000025911	121.275	113.155	103.866	100.735	131.752	130.729	121.831	92.7767	91.4899	78.2754	100.574	90.0393	61.1479	81.8902	0.41912	5.4093e-05	0.00041425	Adhfe1	chr1	+	9547948	9580673	3239	protein_coding	alcohol_dehydrogenase_iron_containing_1	116	131	122	100	109	137	153	101	83	80	86	94	51	82	1.78151	1.64994	1.51717	1.45729	1.91433	1.88648	1.80669	1.2797	1.2307	1.07084
ENSMUSG00000000982	16.7276	7.77402	7.66225	4.02941	1.20874	6.67958	3.18514	0.918581	0	0.978443	5.84734	1.91573	0	3.99464	0.41894	0.0079734	0.030468	Ccl3	chr11	-	83647844	83649355	766	protein_coding	chemokine_(C-C_motif)_ligand_3	16	9	9	4	1	7	4	1	0	1	5	2	0	4	1.03904	0.479317	0.473258	0.246483	0.074263	0.40758	0.199725	0.0535757	0	0.0566001
ENSMUSG00000042473	121.275	158.936	174.529	129.948	137.796	154.584	172.794	94.6138	98.1037	122.305	126.302	96.7444	141.479	86.8835	0.41893	0.00012372	0.00085437	Tbc1d8b	chrX	+	139684996	139753405	5094	protein_coding	TBC1_domain_family_member_8B	116	184	205	129	114	162	217	103	89	125	108	101	118	87	1.13277	1.47356	1.62099	1.19533	1.27306	1.4184	1.62931	0.829804	0.839103	1.06389
ENSMUSG00000086006	10.4548	6.91024	9.36497	5.03676	3.62621	6.67958	3.98142	0.918581	1.10229	2.93533	1.16947	0.957865	8.39284	2.99598	0.4189	0.013746	0.047831	Gm13293	chr2	+	11339489	11342612	669	lincRNA	predicted_gene_13293	10	8	11	5	3	7	5	1	1	3	1	1	7	3	0.743559	0.487835	0.662294	0.352777	0.255092	0.466676	0.285855	0.0613438	0.0717891	0.19442
ENSMUSG00000038059	84.6835	67.3749	80.8793	67.4925	62.8543	54.3908	59.7213	61.5449	47.3984	30.3317	49.1176	40.2303	68.3417	39.9464	0.41835	0.0025893	0.011982	Smim3	chr18	-	60474193	60501983	1984	protein_coding	small_integral_membrane_protein_3	81	78	95	67	52	57	75	67	43	31	42	42	57	40	2.03088	1.60384	1.92871	1.59401	1.49095	1.28138	1.44584	1.38589	1.04091	0.677432
ENSMUSG00000092212	24.0459	21.5945	40.8653	33.2426	35.0533	33.3979	27.8699	17.453	34.1709	14.6766	16.3725	21.073	13.1888	25.9652	0.41831	0.011588	0.041443	Slc22a13b-ps	chr9	-	119220488	119231692	1458	polymorphic_pseudogene	solute_carrier_family_22_(organic_cation_transporter)_member_13b_pseudogene	23	25	48	33	29	35	35	19	31	15	14	22	11	26	0.784715	0.699506	1.32608	1.06835	1.13147	1.07067	0.918148	0.534802	1.02115	0.446046
ENSMUSG00000041828	6753.77	6653.7	6045.52	5980.64	6374.87	6453.42	7327.4	4513.91	5170.83	5020.39	4862.64	4908.1	4580.1	4915.41	0.4181	6.9586e-21	3.0959e-19	Abca8a	chr11	-	110025634	110095978	5619	protein_coding	ATP-binding_cassette_sub-family_A_(ABC1)_member_8a	6460	7703	7101	5937	5274	6763	9202	4914	4691	5131	4158	5124	3820	4922	57.1894	55.9255	50.9032	49.8729	53.3928	53.6814	62.6362	35.89	40.0951	39.5903
ENSMUSG00000001473	171.458	141.66	160.056	162.184	164.388	168.898	143.331	95.5324	72.751	116.435	85.3711	113.028	213.418	86.8835	0.41729	0.0027563	0.012627	Tubb6	chr18	+	67390717	67402748	1757	protein_coding	tubulin_beta_6_class_V	164	164	188	161	136	177	180	104	66	119	73	118	178	87	4.64316	3.80786	4.30993	4.32525	4.4032	4.49309	3.91835	2.42917	1.80408	2.93644
ENSMUSG00000038764	190.277	183.985	194.962	222.625	194.606	243.327	192.701	148.81	131.172	175.141	146.183	126.438	165.459	151.796	0.41727	1.897e-06	1.9562e-05	Ptpn3	chr4	-	57190841	57301837	6369	protein_coding	protein_tyrosine_phosphatase_non-receptor_type_3	182	213	229	221	161	255	242	162	119	179	125	132	138	152	1.42148	1.36432	1.44827	1.63786	1.43799	1.78572	1.45327	1.04386	0.897347	1.21851
ENSMUSG00000022687	203.868	206.444	216.246	172.257	200.65	210.884	214.2	154.322	112.433	158.508	180.098	130.27	165.459	148.8	0.41678	2.4098e-06	2.4499e-05	Boc	chr16	-	44485045	44558897	4452	protein_coding	biregional_cell_adhesion_molecule-related/down-regulated_by_oncogenes_(Cdon)_binding_protein	195	239	254	171	166	221	269	168	102	162	154	136	138	149	2.17882	2.19004	2.29807	1.813	2.12107	2.21401	2.311	1.54864	1.10035	1.57763
ENSMUSG00000020573	29.2733	50.0993	37.4599	27.1985	20.5485	39.1232	33.4439	20.2088	26.4549	17.612	17.542	13.4101	27.5765	35.9518	0.41577	0.012705	0.044658	Pik3cg	chr12	-	32173473	32208659	5871	protein_coding	phosphoinositide-3-kinase_catalytic_gamma_polypeptide	28	58	44	27	17	41	42	22	24	18	15	14	23	36	0.23724	0.403018	0.301874	0.217074	0.164717	0.311469	0.273615	0.153783	0.196329	0.132925
ENSMUSG00000034201	474.646	453.485	558.493	551.021	581.402	510.51	523.159	431.733	328.482	371.808	405.805	364.947	383.673	418.439	0.41564	8.4718e-10	1.4781e-08	Gas2l1	chr11	-	5054132	5065327	3571	protein_coding	growth_arrest-specific_2_like_1	454	525	656	547	481	535	657	470	298	380	347	381	320	419	6.32423	5.99761	7.39943	7.23026	7.66225	6.68201	7.03684	5.40138	4.00784	4.6136
ENSMUSG00000016493	115.002	78.604	61.298	87.6396	43.5145	76.338	104.313	64.3007	70.5465	56.7497	59.6428	56.5141	38.3673	49.9331	0.41464	0.0044385	0.018798	Cd46	chr1	-	195041285	195092248	1828	protein_coding	CD46_antigen_complement_regulatory_protein	110	91	72	87	36	80	131	70	64	58	51	59	32	50	2.99336	2.03083	1.5865	2.24647	1.12028	1.9519	2.74093	1.57152	1.68147	1.37562
ENSMUSG00000015027	232.096	268.636	202.624	160.169	234.495	212.792	216.589	154.322	174.162	137.96	134.489	129.312	212.219	172.768	0.41387	0.00010129	0.00072298	Galns	chr8	-	122578238	122611487	2585	protein_coding	galactosamine_(N-acetyl)-6-sulfate_sulfatase	222	311	238	159	194	223	272	168	158	141	115	135	177	173	4.27203	4.90805	3.70852	2.90331	4.26916	3.84758	4.02449	2.66714	2.93549	2.36485
ENSMUSG00000055541	129.639	130.431	150.691	126.926	116.039	119.278	116.257	98.2882	78.2625	104.693	83.0322	104.407	98.3162	83.8875	0.41369	2.3292e-05	0.00019284	Lair1	chr7	-	4007073	4063204	3461	protein_coding	leukocyte-associated_Ig-like_receptor_1	124	151	177	126	96	125	146	107	71	107	71	109	82	84	1.78222	1.77985	2.05995	1.71841	1.57787	1.61084	1.61344	1.26876	0.985238	1.34038
ENSMUSG00000009292	325.143	288.503	305.639	276.014	278.009	357.834	261.181	244.343	227.071	226.02	201.148	217.435	229.005	202.728	0.4132	6.0878e-08	8.108e-07	Trpm2	chr10	-	77907722	77970563	7274	protein_coding	transient_receptor_potential_cation_channel_subfamily_M_member_2	311	334	359	274	230	375	328	266	206	231	172	227	191	203	2.12681	1.87319	1.98795	1.77801	1.79869	2.29933	1.72466	1.50074	1.36012	1.37684
ENSMUSG00000027315	40.7736	57.0095	53.6357	53.3896	33.8446	35.3063	70.073	33.0689	35.2732	28.3748	30.4061	49.809	22.7806	37.9491	0.41293	0.0072545	0.028136	Spint1	chr2	+	119237362	119249527	2323	protein_coding	serine_protease_inhibitor_Kunitz_type_1	39	66	63	53	28	37	88	36	32	29	26	52	19	38	0.835136	1.15905	1.09239	1.07692	0.685662	0.710388	1.44889	0.63599	0.661584	0.541246
ENSMUSG00000032500	65.865	81.1954	63.8521	85.6249	64.063	59.162	82.8135	64.3007	65.035	43.0515	53.7955	54.5983	25.1785	48.9344	0.41271	0.0026801	0.01232	Dclk3	chr9	+	111439081	111489608	3495	protein_coding	doublecortin-like_kinase_3	63	94	75	85	53	62	104	70	59	44	46	57	21	49	0.896675	1.09721	0.864368	1.14796	0.862641	0.791203	1.13812	0.821955	0.810754	0.545822
ENSMUSG00000027966	314.688	223.719	200.07	188.375	238.121	253.824	244.459	164.426	143.297	205.473	225.707	143.68	166.658	163.78	0.41158	0.00012821	0.00088172	Col11a1	chr3	+	114030540	114220718	7667	protein_coding	collagen_type_XI_alpha_1	301	259	235	187	197	266	307	179	130	210	193	150	139	164	1.95291	1.37811	1.2346	1.15126	1.46165	1.54739	1.53149	0.95813	0.814334	1.18752
ENSMUSG00000024833	268.687	253.951	205.178	270.978	263.504	245.236	270.737	210.355	194.003	193.732	177.759	192.531	171.454	173.767	0.41134	9.5645e-08	1.2394e-06	Pola2	chr19	-	5940543	5964206	2424	protein_coding	polymerase_(DNA_directed)_alpha_2	257	294	241	269	218	257	340	229	176	198	152	201	143	174	5.27403	4.94793	4.00469	5.23813	5.11594	4.72872	5.36474	3.87704	3.4871	3.54143
ENSMUSG00000041797	108.729	109.7	93.6497	87.6396	100.325	136.454	113.869	90.0209	48.5007	89.0383	120.455	45.9775	74.3366	60.9183	0.41127	0.0038985	0.016844	Abca9	chr11	-	110100749	110168196	6384	protein_coding	ATP-binding_cassette_sub-family_A_(ABC1)_member_9	104	127	110	87	83	143	143	98	44	91	103	48	62	61	0.810368	0.811558	0.69404	0.643255	0.739582	0.999048	0.856732	0.629985	0.331012	0.618008
ENSMUSG00000101337	148.458	120.929	108.123	113.831	91.8639	100.194	115.461	54.1963	116.843	90.0167	84.2016	90.9972	64.7448	73.9009	0.41124	0.0010871	0.0056998	Dnah7c	chr1	+	46425592	46807476	12207	protein_coding	dynein_axonemal_heavy_chain_7C	142	140	127	113	76	105	145	59	106	92	72	95	54	74	0.578657	0.467873	0.419063	0.436944	0.354165	0.38364	0.454319	0.198354	0.417044	0.326757
ENSMUSG00000026751	9.40928	6.91024	4.25681	12.0882	1.20874	4.77113	2.38885	1.83716	1.10229	2.93533	3.5084	0.957865	2.39796	1.99732	0.41069	0.013064	0.045783	Nr5a1	chr2	-	38692656	38714542	2994	protein_coding	nuclear_receptor_subfamily_5_group_A_member_1	9	8	5	12	1	5	3	2	1	3	3	1	2	2	0.149531	0.109005	0.0672671	0.189185	0.0189998	0.0744838	0.0383241	0.0274142	0.016041	0.0434425
ENSMUSG00000026074	2774.69	2672.54	2892.07	3007.95	2763.17	2810.19	2845.12	1932.69	1973.1	2154.53	2162.34	2144.66	2323.62	2139.13	0.41005	4.7089e-24	2.5212e-22	Map4k4	chr1	+	39900913	40026310	5782	protein_coding	mitogen-activated_protein_kinase_kinase_kinase_kinase_4	2654	3094	3397	2986	2286	2945	3573	2104	1790	2202	1849	2239	1938	2142	22.8331	21.8299	23.6648	24.3763	22.4905	22.717	23.6351	14.9336	14.8682	16.5114
ENSMUSG00000074183	4.1819	6.04646	11.0677	5.03676	1.20874	11.4507	1.59257	0	0	1.95689	4.67787	0	2.39796	0	0.40983	0.0055763	0.022671	Gsta1	chr9	+	78230656	78242684	875	protein_coding	glutathione_S-transferase_alpha_1_(Ya)	4	7	13	5	1	12	2	0	0	2	4	0	2	0	0.227402	0.326361	0.598439	0.269723	0.065012	0.611669	0.0874227	0	0	0.0990986
ENSMUSG00000032714	292.733	265.181	248.597	213.558	263.504	244.282	253.218	192.902	144.4	165.357	236.232	165.711	196.632	213.713	0.40934	7.7976e-06	7.1953e-05	Syde1	chr10	-	78584503	78591964	3288	protein_coding	synapse_defective_1_Rho_GTPase_homolog_1_(C._elegans)	280	307	292	212	218	256	318	210	131	169	202	173	164	214	4.23612	3.80904	3.57714	3.04341	3.7716	3.47257	3.69911	2.62111	1.91348	2.22844
ENSMUSG00000025213	75.2743	79.4678	107.271	92.6763	87.029	75.3838	118.646	71.6493	52.9098	72.4047	52.626	63.2191	81.5305	65.9116	0.4093	0.00084365	0.0045974	Kazald1	chr19	+	45075241	45079289	1625	protein_coding	Kazal-type_serine_peptidase_inhibitor_domain_1	72	92	126	92	72	79	149	78	48	74	45	66	68	66	2.20405	2.30963	3.12321	2.67234	2.52046	2.16829	3.50699	1.96987	1.41864	1.97435
ENSMUSG00000078942	11.5002	11.2291	1.70272	7.05146	6.04368	2.86268	4.7777	2.75574	2.20458	0	2.33893	0.957865	5.99489	1.99732	0.40927	0.013052	0.045748	Naip6	chr13	-	100281121	100317674	6827	protein_coding	NLR_family_apoptosis_inhibitory_protein_6	11	13	2	7	5	3	6	3	2	0	2	1	5	2	0.0801502	0.0776823	0.0118001	0.0483977	0.0416621	0.019599	0.0336142	0.0180338	0.0140697	0
ENSMUSG00000039234	292.733	336.874	307.341	239.75	275.592	256.687	261.181	218.622	195.105	206.451	230.385	180.079	223.01	210.717	0.40926	3.7494e-07	4.4258e-06	Sec24d	chr3	+	123267496	123365635	3856	protein_coding	Sec24_related_gene_family_member_D_(S._cerevisiae)	280	390	361	238	228	269	328	238	177	211	197	188	186	211	3.61212	4.12607	3.77098	2.91338	3.36356	3.11142	3.25341	2.53301	2.20455	2.37242
ENSMUSG00000025931	460.009	450.03	349.058	322.352	385.587	420.813	408.494	271.9	298.72	281.791	375.399	298.854	250.586	293.606	0.40923	1.6903e-06	1.7606e-05	Paqr8	chr1	+	20890606	20939650	5330	protein_coding	progestin_and_adipoQ_receptor_family_member_VIII	440	521	410	320	319	441	513	296	271	288	321	312	209	294	4.10646	3.98767	3.09843	2.83387	3.40459	3.69024	3.68122	2.27909	2.44189	2.34267
ENSMUSG00000006411	138.003	135.614	146.434	120.882	97.9076	127.866	113.869	118.497	89.2854	87.0814	76.0154	94.8287	109.107	66.9103	0.40913	0.0002873	0.0017889	Pvrl4	chr1	+	171370099	171388598	3636	protein_coding	poliovirus_receptor-related_4	132	157	172	120	81	134	143	129	81	89	65	99	91	67	1.80589	1.76151	1.90541	1.55781	1.26725	1.64371	1.50423	1.456	1.06991	1.06124
ENSMUSG00000024176	542.602	564.912	693.859	606.425	628.543	635.514	621.898	420.71	400.131	510.747	478.312	491.385	447.219	456.388	0.40889	1.133e-10	2.176e-09	Sox8	chr17	-	25565892	25570686	3000	protein_coding	SRY_(sex_determining_region_Y)-box_8	519	654	815	602	520	666	781	458	363	522	409	513	373	457	8.60573	8.89335	10.9426	9.47179	9.86015	9.90139	9.95708	6.26529	5.81125	7.54388
ENSMUSG00000020638	468.373	437.073	372.896	467.411	470.198	419.859	409.29	305.887	324.073	368.873	299.384	316.096	322.525	327.561	0.40888	3.7841e-10	6.912e-09	Cmpk2	chr12	+	26469204	26479835	3198	protein_coding	cytidine_monophosphate_(UMP-CMP)_kinase_2_mitochondrial	448	506	438	464	389	440	514	333	294	377	256	330	269	328	6.96853	6.45477	5.51671	6.84851	6.91946	6.13645	6.14733	4.27329	4.41523	5.11103
ENSMUSG00000026701	3030.83	3088.02	2968.7	3071.41	3165.68	2823.55	2595.09	2370.86	1881.61	2302.28	2488.63	1880.29	2298.44	2272.95	0.40846	2.106e-11	4.4568e-10	Prdx6	chr1	-	161240112	161251219	2387	protein_coding	peroxiredoxin_6	2899	3575	3487	3049	2619	2959	3259	2581	1707	2353	2128	1963	1917	2276	60.414	61.0988	58.8415	60.2923	62.4143	55.2886	52.2197	44.3744	34.3452	42.7381
ENSMUSG00000041120	1268.16	1217.07	1314.5	1208.82	1384	1330.19	1323.42	1014.11	687.828	1059.65	1077.08	778.745	1049.11	1051.59	0.40786	2.6265e-07	3.189e-06	Nbl1	chr4	-	139082284	139092993	1793	protein_coding	neuroblastoma_suppression_of_tumorigenicity_1	1213	1409	1544	1200	1145	1394	1662	1104	624	1083	921	813	875	1053	33.6529	32.0582	34.6858	31.5906	36.3268	34.6757	35.453	25.2689	16.7143	26.1875
ENSMUSG00000003534	3784.62	3925.88	4165.71	3933.71	4604.07	4145.15	4106.44	2888.02	2665.33	3317.9	3129.49	2868.81	3560.96	3027.94	0.40775	3.2943e-13	8.4324e-12	Ddr1	chr17	-	35681567	35704621	3874	protein_coding	discoidin_domain_receptor_family_member_1	3620	4545	4893	3905	3809	4344	5157	3144	2418	3391	2676	2995	2970	3032	46.4826	47.8612	50.8745	47.5793	55.931	50.0119	50.9143	33.3058	29.9765	37.9502
ENSMUSG00000000693	97.2293	77.7402	67.2575	95.6984	99.1163	90.6514	93.9615	90.9395	59.5236	73.3832	63.1512	50.7669	56.352	50.9317	0.40725	0.0011524	0.0059949	Loxl3	chr6	+	83034173	83052562	4098	protein_coding	lysyl_oxidase-like_3	93	90	79	95	82	95	118	99	54	75	54	53	47	51	1.12889	0.895941	0.776497	1.09423	1.13826	1.03394	1.10132	0.991426	0.632858	0.793478
ENSMUSG00000030577	7.31833	5.18268	6.81089	5.03676	2.41747	2.86268	2.38885	0.918581	0	0	1.16947	1.91573	1.19898	3.99464	0.40699	0.00961	0.035601	Cd22	chr7	-	30865402	30880342	3974	protein_coding	CD22_antigen	7	6	8	5	2	3	3	1	0	0	1	2	1	4	0.0876218	0.0615931	0.0810861	0.059388	0.0286288	0.0336695	0.0288732	0.0103269	0	0
ENSMUSG00000028517	1597.49	1512.48	1493.29	1587.59	1683.77	1436.11	1391.11	1032.49	999.776	1229.9	1322.67	1115.91	1085.07	1217.37	0.40698	7.137e-12	1.5764e-10	Ppap2b	chr4	+	105157347	105232764	3159	protein_coding	phosphatidic_acid_phosphatase_type_2B	1528	1751	1754	1576	1393	1505	1747	1124	907	1257	1131	1165	905	1219	24.0611	22.6123	22.3648	23.5485	25.0844	21.2486	21.1517	14.602	13.7893	17.2517
ENSMUSG00000038732	251.96	219.4	170.272	159.162	145.048	238.556	190.312	131.357	148.809	126.219	143.844	130.27	205.025	115.845	0.40651	0.00064747	0.0036431	Mboat1	chr13	+	30136498	30246717	2896	protein_coding	membrane_bound_O-acyltransferase_domain_containing_1	241	254	200	158	120	250	239	143	135	129	123	136	171	116	4.13962	3.57803	2.78174	2.57522	2.35713	3.85021	3.15647	2.02644	2.23882	1.93124
ENSMUSG00000025351	1202.3	1293.08	1397.08	1334.74	1350.16	1390.31	1216.72	806.514	699.953	1048.89	1139.06	822.806	1276.91	941.737	0.4041	0.0001881	0.0012362	Cd63	chr10	+	128908919	128912816	938	protein_coding	CD63_antigen	1150	1497	1641	1325	1117	1457	1528	878	635	1072	974	859	1065	943	60.9869	65.107	70.4677	66.676	67.741	69.2788	62.305	38.4139	32.5129	49.5493
ENSMUSG00000020256	216.414	175.347	194.962	183.338	180.102	241.419	234.107	135.031	202.821	125.241	149.692	185.826	119.898	126.83	0.40407	0.00022015	0.0014151	Aldh1l2	chr10	-	83487450	83534140	6027	protein_coding	aldehyde_dehydrogenase_1_family_member_L2	207	203	229	182	149	253	294	147	184	128	128	194	100	127	1.70848	1.37405	1.53045	1.42537	1.40633	1.87224	1.86573	1.00095	1.46623	0.920777
ENSMUSG00000024411	3328.8	3226.22	3489.73	3340.38	3544.01	3324.52	3440.74	2395.66	2432.75	2631.03	2758.77	2360.18	2511.86	2757.3	0.40389	2.0752e-23	1.0624e-21	Aqp4	chr18	-	15389394	15403684	5082	protein_coding	aquaporin_4	3184	3735	4099	3316	2932	3484	4321	2608	2207	2689	2359	2464	2095	2761	31.1659	29.9823	32.4884	30.799	32.8194	30.5764	32.5201	21.0606	20.857	22.9404
ENSMUSG00000032491	42.8645	47.5079	36.6085	39.2867	58.0193	36.2606	43.7956	44.0919	27.5572	22.5042	25.7283	25.8624	20.3826	42.9424	0.40358	0.0083717	0.031686	Nradd	chr9	-	110621137	110624393	1162	protein_coding	neurotrophin_receptor_associated_death_domain	41	55	43	39	48	38	55	48	25	23	22	27	17	43	1.75517	1.93093	1.49055	1.58422	2.34983	1.45855	1.81033	1.69524	1.03328	0.858158
ENSMUSG00000040663	79.4562	81.1954	96.2038	85.6249	76.1503	68.7042	95.5541	75.3236	55.1144	59.685	50.2871	65.1348	58.7499	60.9183	0.40298	0.00044072	0.0026103	Clcf1	chr19	+	4214238	4223490	3550	protein_coding	cardiotrophin-like_cytokine_factor_1	76	94	113	85	63	72	120	82	50	61	43	68	49	61	1.06494	1.08021	1.28214	1.13018	1.00952	0.904581	1.29287	0.947944	0.676435	0.744984
ENSMUSG00000019122	122.321	134.75	116.636	95.6984	139.005	121.187	83.6098	102.881	97.0014	88.0598	57.3039	93.8708	79.1325	67.909	0.40286	0.00099713	0.0052873	Ccl9	chr11	-	83572919	83578636	3006	protein_coding	chemokine_(C-C_motif)_ligand_9	117	156	137	95	115	127	105	112	88	90	49	98	66	68	1.93615	2.11712	1.83576	1.49173	2.17626	1.88433	1.33599	1.52907	1.40598	1.29807
ENSMUSG00000026305	421.327	338.602	453.775	447.264	390.422	402.683	465.826	283.842	314.152	317.015	336.807	329.506	294.949	310.584	0.40257	1.0616e-08	1.5669e-07	Lrrfip1	chr1	+	90998737	91128944	3645	protein_coding	leucine_rich_repeat_(in_FLII)_interacting_protein_1	403	392	533	444	323	422	585	309	285	324	288	344	246	311	5.49983	4.3873	5.88999	5.74966	5.04088	5.16367	6.13847	3.47903	3.75519	3.85384
ENSMUSG00000002578	453.737	460.395	457.181	416.036	409.761	385.507	526.344	354.572	353.835	332.67	336.807	364.947	252.984	325.564	0.40174	1.7167e-07	2.15e-06	Ikzf4	chr10	-	128630843	128645991	5150	protein_coding	IKAROS_family_zinc_finger_4	434	533	537	413	339	404	661	386	321	340	288	381	211	326	4.19203	4.2221	4.20002	3.78529	3.7445	3.49879	4.90904	3.07593	2.99352	2.86231
ENSMUSG00000021575	1029.79	1182.52	1157	1159.46	1159.18	1234.77	1045.52	956.243	766.09	719.155	829.152	988.517	934.004	775.96	0.40171	2.05e-09	3.3779e-08	Ahrr	chr13	-	74211118	74292331	5099	protein_coding	aryl-hydrocarbon_receptor_repressor	985	1369	1359	1151	959	1294	1313	1041	695	735	709	1032	779	777	9.60933	10.9529	10.7354	10.6548	10.6988	11.3186	9.84876	8.37843	6.54612	6.24954
ENSMUSG00000043496	546.784	475.943	484.424	450.286	494.373	454.211	551.028	324.259	391.312	367.894	390.602	348.663	351.3	420.436	0.40156	1.2663e-09	2.1491e-08	Tril	chr6	-	53815466	53820830	5365	protein_coding	TLR4_interactor_with_leucine-rich_repeats	523	551	569	447	409	476	692	353	355	376	334	364	293	421	4.84924	4.18978	4.27196	3.93273	4.33666	3.95713	4.93331	2.70024	3.17792	3.03853
ENSMUSG00000000753	152.639	147.706	157.502	142.037	140.213	145.042	135.368	98.2882	115.74	101.758	116.947	111.112	116.301	101.863	0.40114	3.3473e-06	3.3024e-05	Serpinf1	chr11	-	75409769	75422701	1832	protein_coding	serine_(or_cysteine)_peptidase_inhibitor_clade_F_member_1	146	171	185	141	116	152	170	107	105	104	100	116	97	102	3.96432	3.80785	4.06753	3.63287	3.60192	3.70051	3.54916	2.39693	2.75263	2.46124
ENSMUSG00000046768	471.51	412.023	433.343	506.698	508.878	465.662	410.086	326.096	185.184	401.161	450.245	164.753	263.775	416.442	0.40075	0.011645	0.041601	Rhoj	chr12	+	75308322	75401456	4892	protein_coding	ras_homolog_gene_family_member_J	451	477	509	503	421	488	515	355	168	410	385	172	220	417	4.58598	3.97778	4.19098	4.85331	4.8955	4.44915	4.02645	2.9781	1.64933	3.63365
ENSMUSG00000050737	54.3647	68.2387	66.4062	79.5808	44.7232	54.3908	63.7027	46.8476	36.3755	51.8575	40.9314	46.9354	56.352	31.9572	0.40051	0.0028987	0.013182	Ptges	chr2	-	30889471	30929863	3647	protein_coding	prostaglandin_E_synthase	52	79	78	79	37	57	80	51	33	53	35	49	47	32	0.709266	0.883691	0.861476	1.02246	0.577122	0.69708	0.838989	0.573894	0.434573	0.630066
ENSMUSG00000091549	93.0474	77.7402	66.4062	45.3308	66.4805	46.757	48.5733	35.8247	59.5236	47.9437	42.1008	33.5253	46.7601	47.9357	0.40033	0.0064251	0.025534	Gm6548	chr17	-	78850792	78851956	1165	pseudogene	predicted_gene_6548	89	90	78	45	55	49	61	39	54	49	36	35	39	48	3.80019	3.15156	2.69683	1.82324	2.68558	1.87592	2.00265	1.37384	2.22614	1.82354
ENSMUSG00000034450	581.285	542.454	597.655	574.19	659.97	642.194	676.045	452.86	414.46	517.596	473.634	459.775	417.244	471.368	0.40025	9.1779e-11	1.7902e-09	Gulo	chr14	-	65986787	66009210	2265	protein_coding	gulonolactone_(L-)_oxidase	556	628	702	570	546	673	849	493	376	529	405	480	348	472	12.2109	11.311	12.484	11.8785	13.7128	13.2523	14.3364	8.93256	7.97268	10.1259
ENSMUSG00000021209	182.958	173.62	155.799	159.162	170.432	147.905	191.108	135.031	152.116	116.435	114.608	113.028	95.9182	146.803	0.39943	3.2053e-05	0.0002585	Ppp4r4	chr12	+	103532283	103613831	3964	protein_coding	protein_phosphatase_4_regulatory_subunit_4	175	201	183	158	141	155	240	147	138	119	98	118	80	147	2.19607	2.06858	1.85952	1.8814	2.02342	1.74398	2.31569	1.52188	1.67198	1.30154
ENSMUSG00000032515	88.8655	101.062	103.866	91.669	118.456	100.194	110.683	80.8351	66.1373	65.5556	93.5574	69.9242	81.5305	70.9049	0.39925	0.00014976	0.0010106	Csrnp1	chr9	-	119971166	119977250	2870	protein_coding	cysteine-serine-rich_nuclear_protein_1	85	117	122	91	98	105	139	88	60	67	80	73	68	71	1.47326	1.66308	1.71223	1.49664	1.94243	1.63174	1.8524	1.25834	1.00405	1.01214
ENSMUSG00000081078	5.22738	4.3189	5.10817	6.04411	3.62621	0.954225	7.96284	0	3.30687	0	2.33893	2.8736	1.19898	0	0.39922	0.010207	0.037428	Gm12568	chr11	-	46243571	46244194	624	pseudogene	predicted_gene_12568	5	5	6	6	3	1	10	0	3	0	2	3	1	0	0.398591	0.326884	0.387303	0.453861	0.273488	0.0714758	0.612939	0	0.230899	0
ENSMUSG00000037408	3022.47	2768.42	2800.13	2928.37	2846.57	2806.38	2837.96	2317.58	2231.03	2054.73	2135.45	2106.35	2063.44	2222.02	0.39869	4.7397e-31	3.7212e-29	Cnnm4	chr1	+	36471620	36508764	4547	protein_coding	cyclin_M4	2891	3205	3289	2907	2355	2941	3564	2523	2024	2100	1826	2199	1721	2225	31.6275	28.7549	29.1356	30.177	29.4623	28.8478	29.9788	22.7714	21.3781	20.0235
ENSMUSG00000059434	992.157	1072.82	1111.88	1315.6	1119.29	1104.99	1455.61	977.37	749.556	825.805	817.458	859.205	881.249	1005.65	0.39858	2.1604e-07	2.6611e-06	Gckr	chr5	+	31297581	31327300	2012	protein_coding	glucokinase_regulatory_protein	949	1242	1306	1306	926	1158	1828	1064	680	844	699	897	735	1007	23.4628	25.1827	26.1457	30.6388	26.1809	25.6699	34.7496	21.7025	16.2318	18.187
ENSMUSG00000032965	598.012	540.727	617.237	626.573	514.921	593.528	496.085	417.954	395.722	466.717	433.872	411.882	446.02	427.427	0.39846	1.0168e-10	1.9607e-09	Ift57	chr16	+	49699233	49765126	2601	protein_coding	intraflagellar_transport_57	572	626	725	622	426	622	623	455	359	477	371	430	372	428	10.9395	9.81845	11.2275	11.2877	9.31688	10.6658	9.16114	7.17907	6.62886	7.95104
ENSMUSG00000023348	318.87	288.503	324.369	297.169	367.456	328.253	316.921	232.401	220.458	245.589	230.385	251.919	264.974	234.685	0.39825	2.623e-09	4.2363e-08	Trip6	chr5	-	137309899	137314241	1760	protein_coding	thyroid_hormone_receptor_interactor_6	305	334	381	295	304	344	398	253	200	251	197	263	221	235	8.62043	7.74181	8.71961	7.91163	9.82567	8.71744	8.64913	5.89936	5.4576	6.18311
ENSMUSG00000038292	118.139	93.2883	98.7579	112.823	64.063	111.644	140.146	90.9395	61.7282	63.5988	86.5406	89.0815	68.3417	76.8969	0.39772	0.0017773	0.0087074	Ccdc155	chr7	-	45183624	45204892	2262	protein_coding	coiled-coil_domain_containing_155	113	108	116	112	53	117	176	99	56	65	74	93	57	77	2.48501	1.94778	2.06562	2.33713	1.33286	2.30694	2.97593	1.79614	1.18899	1.24585
ENSMUSG00000003849	69.0014	65.6473	97.9065	73.5366	77.3591	84.926	70.073	51.4405	50.7053	51.8575	67.8291	37.3568	76.7346	56.9237	0.39746	0.0020359	0.0097996	Nqo1	chr8	-	107388225	107403206	1553	protein_coding	NAD(P)H_dehydrogenase_quinone_1	66	76	115	73	64	89	88	56	46	53	58	39	64	57	2.11405	1.99642	2.98271	2.21875	2.34428	2.55601	2.16727	1.47984	1.42256	1.47962
ENSMUSG00000043313	653.422	783.449	687.9	678.955	687.771	661.278	713.47	475.825	631.611	491.178	500.532	591.961	436.428	529.29	0.397	9.0241e-09	1.3404e-07	Pcdhb19	chr18	+	37496997	37504127	7131	protein_coding	protocadherin_beta_19	625	907	808	674	569	693	896	518	573	502	428	618	364	530	4.35985	5.18879	4.564	4.46135	4.53903	4.33437	4.80573	2.9811	3.85912	3.0521
ENSMUSG00000029822	478.828	583.916	515.073	555.051	497.999	499.06	603.583	406.931	426.586	381.593	423.347	406.135	380.076	394.471	0.39699	5.8145e-11	1.1608e-09	Osbpl3	chr6	-	50293330	50456201	6494	protein_coding	oxysterol_binding_protein-like_3	458	676	605	551	412	523	758	443	387	390	362	424	317	395	3.50829	4.24662	3.75256	4.00494	3.609	3.59197	4.46436	2.79955	2.86209	2.60374
ENSMUSG00000017929	676.423	719.529	720.251	653.771	618.873	677.5	741.34	507.975	509.257	484.329	514.566	535.447	557.525	534.284	0.39642	8.0876e-15	2.395e-13	B4galt5	chr2	-	167298444	167349183	4210	protein_coding	UDP-Gal:betaGlcNAc_beta_14-galactosyltransferase_polypeptide_5	647	833	846	649	512	710	931	553	462	495	440	559	465	535	7.64476	8.07183	8.09418	7.27644	6.91814	7.52176	8.45804	5.39064	5.27041	5.09764
ENSMUSG00000030222	30.3188	44.0528	52.7844	37.272	36.2621	32.4437	53.351	25.7203	36.3755	29.3533	31.5756	15.3258	33.5714	30.9585	0.39578	0.010478	0.038231	Rerg	chr6	-	137054825	137170497	2262	protein_coding	RAS-like_estrogen-regulated_growth-inhibitor	29	51	62	37	30	34	67	28	33	30	27	16	28	31	0.637745	0.919785	1.10404	0.772086	0.754449	0.670393	1.13288	0.507999	0.700658	0.575009
ENSMUSG00000020758	33.4552	43.189	38.3112	46.3382	60.4368	40.0775	50.1659	22.0459	25.3526	21.5257	31.5756	27.7781	43.1632	46.9371	0.3957	0.010399	0.038023	Itgb4	chr11	+	115974709	116008412	6208	protein_coding	integrin_beta_4	32	50	45	46	50	42	63	24	23	22	27	29	36	47	0.256413	0.328569	0.291975	0.349754	0.458163	0.301746	0.388142	0.158656	0.177935	0.153644
ENSMUSG00000032198	355.462	298.868	264.773	264.933	296.14	286.268	307.366	250.773	197.31	223.085	233.893	168.584	235	241.676	0.39516	3.2375e-06	3.2094e-05	Dock6	chr9	-	21800184	21852635	6556	protein_coding	dedicator_of_cytokinesis_6	340	346	311	263	245	300	386	273	179	228	200	176	196	242	2.57977	2.15301	1.91076	1.89354	2.12583	2.04092	2.25191	1.70892	1.31129	1.50779
ENSMUSG00000043895	65.865	68.2387	63.8521	51.3749	80.9853	68.7042	90.7764	40.4176	55.1144	54.7928	52.626	30.6517	73.1376	46.9371	0.39505	0.0046452	0.019523	S1pr2	chr9	-	20965952	20976793	2815	protein_coding	sphingosine-1-phosphate_receptor_2	63	79	75	51	67	72	114	44	50	56	45	32	61	47	1.11328	1.14487	1.07317	0.855162	1.35393	1.14077	1.54892	0.641463	0.853053	0.862493
ENSMUSG00000054434	187.14	137.341	216.246	220.61	152.301	191.799	144.127	105.637	117.945	162.421	145.014	134.101	139.081	116.843	0.39428	0.00043459	0.002578	Tmem120b	chr5	+	123068415	123117749	2164	protein_coding	transmembrane_protein_120B	179	159	254	219	126	201	181	115	107	166	124	140	116	117	4.11469	2.99743	4.72782	4.77687	3.31219	4.14269	3.19907	2.18091	2.37471	3.3258
ENSMUSG00000037849	6.27286	3.45512	1.70272	7.05146	6.04368	5.72535	3.18514	2.75574	1.10229	0	3.5084	0	2.39796	0.998661	0.39425	0.013358	0.046661	Gm4955	chr1	-	173468509	173491041	2133	protein_coding	predicted_gene_4955	6	4	2	7	5	6	4	3	1	0	3	0	2	1	0.139927	0.0765029	0.037768	0.154904	0.133346	0.12546	0.0717251	0.0577201	0.0225161	0
ENSMUSG00000018387	48.0919	51.8268	50.2303	38.2793	35.0533	38.169	40.6105	25.7203	35.2732	28.3748	33.9145	39.2725	28.7755	25.9652	0.39393	0.0055709	0.022666	Shroom1	chr11	+	53457205	53467766	4548	protein_coding	shroom_family_member_1	46	60	59	38	29	40	51	28	32	29	29	41	24	26	0.503129	0.538195	0.522536	0.394384	0.362726	0.392268	0.428896	0.252659	0.33792	0.276454
ENSMUSG00000061393	929.428	830.093	872.645	1031.53	825.566	911.285	907.764	655.867	696.646	609.57	687.647	713.61	689.412	720.035	0.39393	2.5906e-13	6.742e-12	Acvr2b	chr9	+	119402444	119433501	1729	protein_coding	activin_receptor_IIB	889	961	1025	1024	683	955	1140	714	632	623	588	745	575	721	25.5769	22.6745	23.8789	27.9551	22.4712	24.635	25.2181	16.9473	17.5552	15.6221
ENSMUSG00000004562	495.556	444.847	540.614	521.808	520.965	465.662	500.066	325.178	384.699	399.205	395.28	380.273	407.652	344.538	0.39386	2.3971e-10	4.4702e-09	Arhgef40	chr14	+	51984719	52006251	5621	protein_coding	Rho_guanine_nucleotide_exchange_factor_(GEF)_40	474	515	635	518	431	488	628	354	349	408	338	397	340	345	4.19475	3.73768	4.55035	4.34984	4.36179	3.87213	4.27315	2.58456	2.98192	3.14697
ENSMUSG00000029659	115.002	90.6969	155.799	122.897	130.543	164.127	117.85	91.8581	69.4442	107.629	95.8963	108.239	89.9233	93.8741	0.39379	0.00076323	0.0042095	Medag	chr5	+	149411749	149431723	2953	protein_coding	mesenteric_estrogen_dependent_adipogenesis	110	105	183	122	108	172	148	100	63	110	82	113	75	94	1.85298	1.45056	2.49616	1.95008	2.08047	2.59782	1.9169	1.38974	1.02462	1.61501
ENSMUSG00000000957	493.465	406.841	519.33	481.514	570.523	488.563	448.308	295.783	308.641	432.472	466.617	285.444	357.295	392.474	0.39351	3.6619e-05	0.00029102	Mmp14	chr14	+	54431604	54441258	2597	protein_coding	matrix_metallopeptidase_14_(membrane-inserted)	472	471	610	478	472	512	563	322	280	442	399	298	298	393	9.0409	7.39874	9.46112	8.68786	10.3388	8.79309	8.2916	5.0884	5.1781	7.37898
ENSMUSG00000020620	933.61	989.892	886.267	825.021	835.236	917.01	1093.3	669.646	801.364	702.522	624.495	802.691	537.142	731.02	0.39273	4.1681e-07	4.8709e-06	Abca8b	chr11	-	109932190	109995845	7423	protein_coding	ATP-binding_cassette_sub-family_A_(ABC1)_member_8b	893	1146	1041	819	691	961	1373	729	727	718	534	838	448	732	5.98431	6.29816	5.64879	5.20788	5.29541	5.77414	7.07446	4.03037	4.7037	4.19364
ENSMUSG00000038859	60.6376	61.3284	51.933	64.4705	73.7329	69.6584	53.351	43.1733	48.5007	53.8143	54.965	41.1882	32.3724	40.9451	0.39101	0.0022284	0.010552	Baiap2l1	chr5	-	144264526	144358112	3247	protein_coding	BAI1-associated_protein_2-like_1	58	71	61	64	61	73	67	47	44	55	47	43	27	41	0.888561	0.892041	0.756715	0.930367	1.06868	1.00273	0.789214	0.594036	0.650811	0.734389
ENSMUSG00000035284	2368	2444.5	2394.03	2391.45	2063.31	2532.51	2767.09	1481.67	1956.56	1760.22	1950.67	2125.5	1799.67	1744.66	0.39099	3.8931e-09	6.1441e-08	Vps13c	chr9	+	67840396	67995634	11523	protein_coding	vacuolar_protein_sorting_13C_(yeast)	2265	2830	2812	2374	1707	2654	3475	1613	1775	1799	1668	2219	1501	1747	9.77787	10.0191	9.82956	9.7246	8.42693	10.2726	11.5343	5.74468	7.39805	6.76879
ENSMUSG00000030844	130.684	107.109	143.88	102.75	112.412	136.454	91.5727	91.8581	82.6716	95.8874	102.913	80.4607	92.3213	62.9156	0.39052	0.00063269	0.0035674	Rgs10	chr7	-	128373621	128418758	880	protein_coding	regulator_of_G-protein_signalling_10	125	124	169	102	93	143	115	100	75	98	88	84	77	63	7.06593	5.74841	7.7355	5.47109	6.01176	7.24764	4.99824	4.66353	4.0932	4.82824
ENSMUSG00000027004	613.694	630.56	674.278	664.852	681.727	672.729	672.064	461.128	562.167	515.639	478.312	489.469	503.571	492.34	0.38976	7.5224e-15	2.2418e-13	Frzb	chr2	-	80411970	80447625	3149	protein_coding	frizzled-related_protein	587	730	792	660	564	705	844	502	510	527	409	511	420	493	9.27272	9.45712	10.1306	9.893	10.1884	9.98527	10.2511	6.54226	7.77825	7.25577
ENSMUSG00000091387	230.005	229.766	283.503	244.786	245.373	215.655	257.996	178.205	201.719	175.141	171.912	195.405	176.25	189.746	0.38909	2.4762e-07	3.0182e-06	Gcnt4	chr13	+	96924689	96950912	5093	protein_coding	glucosaminyl_(N-acetyl)_transferase_4_core_2_(beta-16-N-acetylglucosaminyltransferase)	220	266	333	243	203	226	324	194	183	179	147	204	147	190	2.14877	2.13067	2.63363	2.25211	2.26738	1.97915	2.43318	1.56324	1.72569	1.52379
ENSMUSG00000041959	462.1	464.714	514.222	372.72	491.955	460.891	413.271	349.061	221.56	328.757	362.535	265.329	508.367	276.629	0.38893	0.0032362	0.014444	S100a10	chr3	+	93555080	93564643	685	protein_coding	S100_calcium_binding_protein_A10_(calpactin)	442	538	604	370	407	483	519	380	201	336	310	277	424	277	32.0977	32.0406	35.5166	25.4957	33.7991	31.4485	28.9787	22.7662	14.0926	21.2664
ENSMUSG00000026222	52.2738	62.1922	45.9735	44.3235	42.3057	37.2148	46.9808	49.6034	24.2503	23.4826	44.4398	32.5674	31.1734	29.9598	0.38848	0.0091054	0.034056	Sp100	chr1	+	85649988	85709998	3807	protein_coding	nuclear_antigen_Sp100	50	72	54	44	35	39	59	54	22	24	38	34	26	30	0.653324	0.77154	0.571341	0.54554	0.522982	0.456904	0.592749	0.582114	0.277539	0.273322
ENSMUSG00000087301	34.5007	33.6874	51.0817	41.3014	29.0097	41.9859	42.203	35.8247	26.4549	35.2239	21.0504	24.9045	22.7806	27.9625	0.38798	0.009321	0.034737	Gm13629	chr2	+	66440880	66546026	1022	antisense	predicted_gene_13629	33	39	60	41	24	44	53	39	24	36	18	26	19	28	1.60622	1.55676	2.36475	1.89361	1.33586	1.92019	1.98348	1.56607	1.12783	1.5272
ENSMUSG00000050335	26.1369	36.2788	30.649	34.2499	35.0533	28.6268	46.1845	15.6159	18.7389	30.3317	28.0672	19.1573	147.474	26.9638	0.38783	0.013396	0.04676	Lgals3	chr14	+	47367751	47386160	1419	protein_coding	lectin_galactose_binding_soluble_3	25	42	36	34	29	30	58	17	17	31	24	20	123	27	0.876394	1.20747	1.02189	1.13098	1.16256	0.942936	1.56332	0.491658	0.575375	0.947164
ENSMUSG00000090386	80.5016	73.4213	76.6225	70.5146	54.3931	60.1162	71.6656	48.6848	61.7282	58.7066	46.7787	56.5141	44.3622	41.9438	0.38749	0.0014921	0.0074868	2810055G20Rik	chr16	+	77236317	77691403	3422	processed_transcript	Mir99a_and_Mirlet7c-1_host_gene_(non-protein_coding)	77	85	90	70	45	63	90	53	56	60	40	59	37	42	1.11932	1.01332	1.05937	0.96555	0.748056	0.821115	1.00592	0.635613	0.785946	0.760181
ENSMUSG00000034771	739.151	598.6	835.185	754.506	644.256	642.194	787.525	550.23	597.44	531.294	541.463	645.601	442.423	456.388	0.38739	2.6799e-06	2.6923e-05	Tle2	chr10	+	81574561	81590845	4388	protein_coding	transducin-like_enhancer_of_split_2_homolog_of_Drosophila_E(spl)	707	693	981	749	533	673	989	599	542	543	463	674	369	457	8.01483	6.44281	9.00507	8.05697	6.90974	6.84056	8.62049	5.60218	5.93222	5.36511
ENSMUSG00000023033	3865.12	3985.48	3791.11	4176.48	3685.43	3945.72	4050.7	2839.33	3102.94	2718.11	3151.71	3276.86	2899.13	2967.02	0.38733	2.5213e-20	1.0931e-18	Scn8a	chr15	+	100870683	101045929	11293	protein_coding	sodium_channel_voltage-gated_type_VIII_alpha	3697	4614	4453	4146	3049	4135	5087	3091	2815	2778	2695	3421	2418	2971	16.2848	16.6678	15.8828	17.3291	15.3585	16.3309	17.2288	11.2328	11.9716	10.6652
ENSMUSG00000029712	679.559	672.021	665.764	716.227	684.144	715.669	666.49	506.138	499.337	554.777	512.227	549.815	520.356	506.321	0.38733	2.6588e-17	9.4815e-16	Actl6b	chr5	+	137553517	137569582	1592	protein_coding	actin-like_6B	650	778	782	711	566	750	837	551	453	567	438	574	434	507	20.3101	19.9363	19.7856	21.0806	20.2244	21.0117	20.1087	14.2038	13.6659	15.4414
ENSMUSG00000023886	84.6835	81.1954	63.0007	56.4117	67.6892	50.5739	80.4247	61.5449	59.5236	54.7928	37.423	53.6405	35.9693	46.9371	0.3863	0.0040834	0.017505	Smoc2	chr17	+	14279506	14404790	2832	protein_coding	SPARC_related_modular_calcium_binding_2	81	94	74	56	56	53	101	67	54	56	32	56	30	47	1.42277	1.35408	1.0525	0.933365	1.12485	0.834691	1.36405	0.970909	0.915767	0.857315
ENSMUSG00000080316	462.1	346.376	373.748	357.61	279.218	349.246	419.642	242.505	299.822	273.964	199.979	359.2	284.158	271.636	0.3863	0.00015297	0.0010307	Spaca6	chr17	+	17830719	17843009	4074	protein_coding	sperm_acrosome_associated_6	442	401	439	355	231	366	527	264	272	280	171	375	237	272	5.39688	4.01543	4.34038	4.11305	3.22546	4.00685	4.94757	2.65938	3.20651	2.97977
ENSMUSG00000021057	225.823	229.766	256.26	233.706	187.354	252.87	179.96	161.67	176.366	132.09	166.064	204.025	191.836	140.811	0.38623	8.9453e-05	0.00064675	Akap5	chr12	+	76324891	76334153	6687	protein_coding	A_kinase_(PRKA)_anchor_protein_5	216	266	301	232	155	265	226	176	160	135	142	213	160	141	1.60681	1.62278	1.81309	1.63762	1.31857	1.76749	1.29264	1.08014	1.14914	0.875282
ENSMUSG00000037197	1624.67	1578.13	1494.14	1589.6	1503.67	1607.87	1461.18	1102.3	1173.94	1270.02	1280.57	1138.9	1139.03	1175.42	0.38605	5.3105e-20	2.24e-18	Rbm17	chr2	-	11585439	11604153	1570	protein_coding	RNA_binding_motif_protein_17	1554	1827	1755	1578	1244	1685	1835	1200	1065	1298	1095	1189	950	1177	49.2372	47.4731	45.0259	47.4421	45.0736	47.8678	44.7032	31.3674	32.5788	35.8444
ENSMUSG00000008398	224.777	250.496	195.813	218.595	194.606	170.806	198.275	175.449	146.604	157.529	162.556	140.806	167.857	143.807	0.38541	9.4752e-06	8.5876e-05	Elk3	chr10	-	93247414	93311135	4212	protein_coding	ELK3_member_of_ETS_oncogene_family	215	290	230	217	161	179	249	191	133	161	139	147	140	144	2.53917	2.80879	2.1995	2.4318	2.1744	1.89543	2.26106	1.86098	1.51652	1.65723
ENSMUSG00000023963	182.958	188.304	177.934	164.198	163.179	163.173	177.571	118.497	149.911	114.478	143.844	85.25	172.653	128.827	0.38535	0.000228	0.001454	Cyp39a1	chr17	+	43667425	43751431	3053	protein_coding	cytochrome_P450_family_39_subfamily_a_polypeptide_1	175	218	209	163	135	171	223	129	136	117	123	89	144	129	2.85137	2.91299	2.75743	2.5201	2.51541	2.49812	2.7937	1.73404	2.13942	1.66152
ENSMUSG00000058325	567.693	568.368	524.438	593.33	644.256	532.458	621.101	429.896	472.882	408.989	445.567	477.975	413.647	427.427	0.38512	3.754e-11	7.6497e-10	Dock1	chr7	+	134670687	135173639	6807	protein_coding	dedicator_of_cytokinesis_1	543	658	616	589	533	558	780	468	429	418	381	499	345	428	3.96813	3.94347	3.6451	4.08429	4.45423	3.65613	4.38269	2.82155	3.02682	2.66236
ENSMUSG00000044022	302.143	277.274	234.124	283.066	246.582	273.863	265.959	197.495	210.537	182.969	235.063	250.961	161.862	176.763	0.38508	1.0559e-05	9.4628e-05	Pcdhb21	chr18	+	37513652	37518313	4662	protein_coding	protocadherin_beta_21	289	321	275	281	204	287	334	215	191	187	201	262	135	177	3.08367	2.80893	2.37599	2.84506	2.4892	2.7457	2.74016	1.89262	1.96764	1.73906
ENSMUSG00000032737	832.199	769.628	881.159	937.844	948.857	869.299	863.172	691.691	688.93	562.604	697.002	565.141	791.325	633.151	0.38498	1.5189e-08	2.1933e-07	Inppl1	chr7	-	101822632	101838076	4842	protein_coding	inositol_polyphosphate_phosphatase-like_1	796	891	1035	931	785	911	1084	753	625	575	596	590	660	634	8.17768	7.50692	8.60994	9.07573	9.22245	8.39145	8.56262	6.38215	6.19926	5.1486
ENSMUSG00000047139	433.872	342.921	359.274	507.705	321.524	325.391	317.717	282.923	273.368	296.468	273.655	197.32	4229.99	298.6	0.38498	0.00018557	0.0012223	Cd24a	chr10	+	43579169	43584262	1813	protein_coding	CD24a_antigen	415	397	422	504	266	341	399	308	248	303	234	206	3528	299	11.3865	8.93309	9.3756	13.1217	8.34613	8.3888	8.41738	6.97188	6.56959	7.24587
ENSMUSG00000051279	50.1828	35.415	34.0544	31.2279	61.6455	50.5739	42.203	45.0105	23.1481	29.3533	26.8977	26.8202	25.1785	35.9518	0.38495	0.01244	0.043933	Gdf6	chr4	+	9844372	9862345	3532	protein_coding	growth_differentiation_factor_6	48	41	40	31	51	53	53	49	21	30	23	28	21	36	0.676024	0.473557	0.456167	0.414283	0.821393	0.669266	0.573928	0.569341	0.285551	0.368253
ENSMUSG00000052056	193.413	171.892	177.934	157.147	189.771	206.113	191.904	148.81	132.275	147.745	141.506	127.396	142.678	131.823	0.38371	2.5712e-06	2.5943e-05	Zfp217	chr2	-	170108643	170148103	5685	protein_coding	zinc_finger_protein_217	185	199	209	156	157	216	241	162	120	151	121	133	119	132	1.61876	1.42801	1.48081	1.29524	1.57098	1.6946	1.62139	1.16945	1.01376	1.15157
ENSMUSG00000020892	87.82	76.8765	52.7844	69.5072	67.6892	68.7042	73.2581	72.5679	47.3984	45.0084	56.1344	45.9775	45.5612	49.9331	0.38306	0.0027083	0.012428	Aloxe3	chr11	+	69125896	69149115	4684	protein_coding	arachidonate_lipoxygenase_3	84	89	62	69	56	72	92	79	43	46	48	48	38	50	0.892081	0.775143	0.533162	0.695327	0.6801	0.685581	0.75123	0.692161	0.440896	0.425781
ENSMUSG00000046417	136.957	137.341	171.124	167.22	152.301	151.722	152.09	119.416	103.615	144.809	98.2352	117.817	122.296	94.8728	0.38283	6.2928e-05	0.00047415	Lrrc75a	chr11	-	62604884	62648523	1984	protein_coding	leucine_rich_repeat_containing_75A	131	159	201	166	126	159	191	130	94	148	84	123	102	95	3.28452	3.26937	4.08074	3.94933	3.61269	3.57436	3.68208	2.68905	2.27547	3.23419
ENSMUSG00000029135	177.731	287.639	398.437	341.492	367.456	306.306	302.588	230.564	131.172	237.762	216.351	216.478	318.928	202.728	0.38277	0.010951	0.039666	Fosl2	chr5	+	32136472	32157831	5855	protein_coding	fos-like_antigen_2	170	333	468	339	304	321	380	251	119	243	185	226	266	203	1.44432	2.3202	3.21961	2.73294	2.95358	2.44524	2.48233	1.75932	0.976123	1.79939
ENSMUSG00000028970	70.0469	74.2851	45.9735	72.5293	55.6018	51.5282	62.1101	51.4405	35.2732	28.3748	40.9314	33.5253	80.3315	37.9491	0.38232	0.012669	0.044549	Abcb1b	chr5	+	8798147	8866314	4344	protein_coding	ATP-binding_cassette_sub-family_B_(MDR/TAP)_member_1B	67	86	54	72	46	54	78	56	32	29	35	35	67	38	0.767232	0.807639	0.500713	0.782347	0.602378	0.554431	0.686763	0.529048	0.353789	0.289437
ENSMUSG00000038388	730.788	742.851	744.09	716.227	666.013	709.944	676.841	553.904	587.52	553.798	534.447	516.289	543.137	525.296	0.38167	2.7828e-16	9.1226e-15	Mpp6	chr6	+	50110241	50198598	2222	protein_coding	membrane_protein_palmitoylated_6_(MAGUK_p55_subfamily_member_6)	699	860	874	711	551	744	850	603	533	566	457	539	453	526	15.6486	15.7893	15.8435	15.1037	14.1062	14.9339	14.6311	11.1371	11.5204	11.0438
ENSMUSG00000049001	3035.02	3069.88	3120.24	2931.39	2917.89	3007.72	3361.91	1971.27	2270.71	2420.67	2488.63	2580.49	2257.68	2394.79	0.38128	4.6441e-14	1.2914e-12	Ndnf	chr6	+	65671590	65706930	4705	protein_coding	neuron-derived_neurotrophic_factor	2903	3554	3665	2910	2414	3152	4222	2146	2060	2474	2128	2694	1883	2398	30.6923	30.8153	31.3761	29.1938	29.1863	29.8793	34.3211	18.7183	21.0277	22.7974
ENSMUSG00000052911	605.331	538.999	630.007	638.661	649.091	651.736	547.047	439.082	373.676	443.234	540.294	364.947	587.499	472.367	0.38125	8.1498e-06	7.4871e-05	Lamb2	chr9	+	108479862	108490530	5624	protein_coding	laminin_beta_2	579	624	740	634	537	683	687	478	339	453	462	381	490	473	5.12124	4.52635	5.29994	5.32109	5.43163	5.4165	4.67211	3.48803	2.89494	3.4922
ENSMUSG00000028133	84.6835	110.564	42.5681	79.5808	65.2717	77.2922	91.5727	63.3821	44.0915	46.9652	65.4902	64.177	52.755	61.917	0.38115	0.0072386	0.028087	Rwdd3	chr3	-	121155400	121171695	2260	protein_coding	RWD_domain_containing_3	81	128	50	79	54	81	115	69	40	48	56	67	44	62	1.78286	2.31052	0.89114	1.64997	1.35921	1.59853	1.94622	1.25296	0.850033	0.920828
ENSMUSG00000002319	1934.13	1815.67	1902.79	2105.36	1979.91	1931.35	1629.99	1462.38	1362.43	1474.51	1561.24	1350.59	1539.49	1402.12	0.38112	1.0946e-13	2.9471e-12	Ipo4	chr14	-	55625400	55637895	4312	protein_coding	importin_4	1850	2102	2235	2090	1638	2024	2047	1592	1236	1507	1335	1410	1284	1404	21.342	19.8867	20.8777	22.8783	21.6091	20.9351	18.1569	15.1517	13.7665	15.1524
ENSMUSG00000025870	357.553	336.011	300.53	322.352	369.873	332.07	328.069	242.505	294.311	230.912	250.266	242.34	278.163	245.671	0.38108	1.933e-08	2.753e-07	Arl10	chr13	+	54575015	54581128	1046	protein_coding	ADP-ribosylation_factor-like_10	342	389	353	320	306	348	412	264	267	236	214	253	232	246	16.2643	15.1714	13.5934	14.4403	16.6414	14.8385	15.0649	10.3578	12.2593	9.78196
ENSMUSG00000007041	377.417	411.159	409.505	410.999	371.082	411.271	330.458	312.318	223.765	305.274	316.926	253.834	376.479	269.638	0.38086	1.031e-05	9.2849e-05	Clic1	chr17	+	35049966	35058749	1466	protein_coding	chloride_intracellular_channel_1	361	476	481	408	307	431	415	340	203	312	271	265	314	270	12.2494	13.2459	13.2159	13.1366	11.9126	13.1125	10.8272	9.51792	6.65038	9.22712
ENSMUSG00000039497	111.866	93.2883	96.2038	80.5881	132.961	90.6514	97.9429	72.5679	45.1938	90.0167	115.777	37.3568	83.9284	57.9223	0.38048	0.011219	0.040415	Dse	chr10	-	34151394	34207551	4224	protein_coding	dermatan_sulfate_epimerase	107	108	113	80	110	95	123	79	41	92	99	39	70	58	1.26009	1.04306	1.07755	0.89397	1.48139	1.0031	1.11374	0.767539	0.46617	0.944299
ENSMUSG00000019960	553.057	570.095	624.899	459.352	595.907	587.803	578.898	462.046	427.688	359.088	452.584	404.219	456.811	460.383	0.38041	2.7176e-08	3.8067e-07	Dusp6	chr10	+	99263231	99267488	2796	protein_coding	dual_specificity_phosphatase_6	529	660	734	456	493	616	727	503	388	367	387	422	381	461	9.41153	9.62976	10.5741	7.69811	10.0302	9.82623	9.94487	7.38291	6.66468	5.69082
ENSMUSG00000029314	104.548	116.61	114.082	97.7131	140.213	120.232	89.9801	83.5909	67.2396	92.952	100.574	78.545	74.3366	84.8862	0.38005	0.00046544	0.0027384	Agpat9	chr5	+	100845713	100899102	3059	protein_coding	1-acylglycerol-3-phosphate_O-acyltransferase_9	100	135	134	97	116	126	113	91	61	95	86	82	62	85	1.62616	1.80038	1.76445	1.49675	2.15715	1.83711	1.41287	1.22084	0.957712	1.34645
ENSMUSG00000027963	2623.1	2595.66	2615.38	2516.36	2680.98	2590.72	2293.3	1940.04	1954.36	2031.25	1956.52	1872.63	1990.3	1977.35	0.38003	1.3408e-25	7.9284e-24	Extl2	chr3	+	116007462	116029016	2999	protein_coding	exostoses_(multiple)-like_2	2509	3005	3072	2498	2218	2715	2880	2112	1773	2076	1673	1955	1660	1980	41.6165	40.8768	41.26	39.3163	42.0713	40.3772	36.7298	28.9011	28.3934	30.0121
ENSMUSG00000017466	3263.98	3334.19	3284.55	3120.77	3334.9	3133.68	3202.65	2321.25	2211.19	2486.22	2771.64	2121.67	2860.76	2548.58	0.37994	8.6281e-12	1.8945e-10	Timp2	chr11	-	118301069	118355740	3709	protein_coding	tissue_inhibitor_of_metalloproteinase_2	3122	3860	3858	3098	2759	3284	4022	2527	2006	2541	2370	2215	2386	2552	41.8714	42.456	41.8977	39.4259	42.3152	39.4902	41.4751	27.9605	25.9752	29.7025
ENSMUSG00000035725	625.195	674.613	671.724	668.881	690.188	667.003	661.712	513.487	487.211	577.281	529.769	474.143	460.407	515.309	0.37989	1.1438e-13	3.0708e-12	Prkx	chrX	-	77761411	77796278	4146	protein_coding	protein_kinase_X-linked	598	781	789	664	571	699	831	559	442	590	453	495	384	516	7.17486	7.68477	7.66535	7.55954	7.83444	7.51954	7.66609	5.53324	5.12009	6.16976
ENSMUSG00000098233	2884.47	2730.41	2303.78	2615.08	2155.18	2529.65	2369.74	1972.19	2238.75	1655.52	1855.94	1908.07	1700.15	2061.24	0.37934	1.6543e-08	2.3816e-07	Gm26954	chr5	-	14696985	14723664	762	antisense	predicted_gene_26954	2759	3161	2706	2596	1783	2651	2976	2147	2031	1692	1587	1992	1418	2064	180.11	169.23	143.04	160.808	133.106	155.167	149.376	115.631	128.009	96.27
ENSMUSG00000076435	188.186	164.982	137.92	146.066	147.466	129.775	146.516	115.741	101.411	118.392	137.997	102.492	103.112	118.841	0.37906	7.7946e-05	0.00057271	Acsf2	chr11	-	94557102	94601871	3154	protein_coding	acyl-CoA_synthetase_family_member_2	180	191	162	145	122	136	184	126	92	121	118	107	86	119	2.83892	2.47048	2.06889	2.17002	2.20039	1.92318	2.2313	1.63948	1.40091	1.6633
ENSMUSG00000091562	255.096	259.134	271.584	223.632	224.825	262.412	271.533	135.95	219.355	205.473	187.115	218.393	179.847	193.74	0.37904	1.7701e-05	0.00015166	Gm9581	chr16	-	59558013	59600886	2870	processed_transcript	predicted_gene_9581	244	300	319	222	186	275	341	148	199	210	160	228	150	194	4.22912	4.2643	4.47706	3.65113	3.68665	4.2736	4.54438	2.1163	3.33009	3.17236
ENSMUSG00000025239	521.692	481.989	540.614	544.977	541.514	518.144	537.492	387.641	408.949	406.054	383.585	386.978	431.632	417.44	0.37789	1.8572e-13	4.8672e-12	Limd1	chr9	+	123478701	123521548	4849	protein_coding	LIM_domains_containing_1	499	558	635	541	448	543	675	422	371	415	328	404	360	418	5.11906	4.69452	5.2748	5.26625	5.25566	4.99449	5.32419	3.57155	3.67457	3.71058
ENSMUSG00000026471	136.957	115.747	133.664	115.845	136.587	136.454	101.924	103.8	88.1831	89.0383	107.591	71.8399	100.714	96.8701	0.3774	0.00021977	0.0014132	Mr1	chr1	-	155127878	155146783	2512	protein_coding	major_histocompatibility_complex_class_I-related	131	134	157	115	113	143	128	113	80	91	92	75	84	97	2.59414	2.17618	2.51747	2.1609	2.55894	2.53898	1.94891	1.8461	1.52952	1.57061
ENSMUSG00000044177	149.503	148.57	150.691	123.904	134.17	139.317	131.387	106.555	81.5693	109.586	128.641	104.407	86.3264	118.841	0.37723	9.8419e-05	0.00070489	Wfikkn2	chr11	-	94235956	94246005	3516	protein_coding	WAP_follistatin/kazal_immunoglobulin_kunitz_and_netrin_domain_containing_2	143	172	177	123	111	146	165	116	74	112	110	109	72	119	2.02315	1.99567	2.02772	1.65125	1.79587	1.85203	1.79489	1.35396	1.0108	1.38107
ENSMUSG00000026170	162.049	135.614	144.731	102.75	116.039	117.37	164.034	101.962	94.7968	103.715	101.744	124.523	89.9233	89.8795	0.37645	0.00052904	0.0030575	Cyp27a1	chr1	+	74713574	74737892	1892	protein_coding	cytochrome_P450_family_27_subfamily_a_polypeptide_1	155	157	170	102	96	123	206	111	86	106	87	130	75	90	4.07523	3.38522	3.6192	2.54469	2.88637	2.89953	4.16436	2.40768	2.18304	2.42902
ENSMUSG00000041703	98.2747	73.4213	66.4062	79.5808	71.3154	104.011	92.3689	71.6493	46.2961	60.6634	80.6932	22.9888	63.5458	73.9009	0.3764	0.01258	0.044321	Zic5	chr14	-	122456795	122465677	4767	protein_coding	zinc_finger_protein_of_the_cerebellum_5	94	85	78	79	59	109	116	78	42	62	69	24	53	74	0.980899	0.727416	0.659074	0.782237	0.704058	1.01982	0.930711	0.671501	0.423144	0.563887
ENSMUSG00000020019	523.783	493.219	401.842	383.801	450.858	398.866	473.789	348.142	375.88	303.317	297.045	302.685	393.265	357.521	0.37572	2.6882e-06	2.6992e-05	Ntn4	chr10	+	93640681	93747207	3646	protein_coding	netrin_4	501	571	472	381	373	418	595	379	341	310	254	316	328	358	6.83538	6.38893	5.21447	4.93248	5.81961	5.11332	6.24169	4.26599	4.49182	3.6863
ENSMUSG00000046387	833.244	881.92	729.616	776.668	777.217	811.091	833.709	589.729	556.656	556.734	636.19	670.506	659.438	656.12	0.37557	1.96e-11	4.1667e-10	Pcdhb17	chr18	+	37485021	37488289	3269	protein_coding	protocadherin_beta_17	797	1021	857	771	643	850	1047	642	505	569	544	700	550	657	12.1279	12.7415	10.5597	11.1326	11.1892	11.597	12.2499	8.05967	7.41927	7.54646
ENSMUSG00000020707	93.0474	78.604	80.8793	72.5293	67.6892	78.2465	85.2024	73.4865	52.9098	73.3832	46.7787	45.9775	68.3417	51.9304	0.37538	0.0019804	0.0095746	Rnf135	chr11	+	80183851	80199757	1984	protein_coding	ring_finger_protein_135	89	91	95	72	56	82	107	80	48	75	40	48	57	52	2.23147	1.87115	1.92871	1.71296	1.60564	1.84338	2.06274	1.6548	1.16194	1.63895
ENSMUSG00000005057	56.4557	60.4646	74.0684	73.5366	83.4028	67.75	57.3324	55.1149	31.9664	69.4694	54.965	45.9775	39.5663	46.9371	0.3753	0.0050952	0.02112	Sh2b2	chr5	-	136218149	136244903	2848	protein_coding	SH2B_adaptor_protein_2	54	70	87	73	69	71	72	60	29	71	47	48	33	47	0.943182	1.00269	1.23045	1.20987	1.37819	1.11189	0.966929	0.864586	0.489038	1.08085
ENSMUSG00000027848	310.506	254.815	274.99	237.735	310.645	291.039	293.829	157.996	166.446	239.718	229.216	212.646	962.779	229.692	0.37502	7.3731e-05	0.00054542	Olfml3	chr3	-	103733700	103738001	3981	protein_coding	olfactomedin-like_3	297	295	323	236	257	305	369	172	151	245	196	222	803	230	3.71113	3.023	3.2681	2.79819	3.67234	3.41705	3.54516	1.7731	1.82167	2.66821
ENSMUSG00000027215	270.778	285.911	237.53	212.551	298.558	282.451	246.052	214.029	139.991	218.193	278.333	131.228	197.831	188.747	0.37499	0.0011588	0.0060217	Cd82	chr2	-	93419111	93463140	1824	protein_coding	CD82_antigen	259	331	279	211	247	296	309	233	127	223	238	137	165	189	7.06345	7.40307	6.16118	5.46027	7.70324	7.23786	6.47941	5.24238	3.34398	5.30061
ENSMUSG00000025188	167.276	133.022	120.042	149.088	125.709	130.729	168.812	110.23	121.252	88.0598	76.0154	123.565	119.898	106.857	0.37468	0.00052595	0.0030427	Hps1	chr19	-	42755105	42779978	4189	protein_coding	Hermansky-Pudlak_syndrome_1_homolog_(human)	160	154	141	148	104	137	212	120	110	90	65	129	100	107	1.89999	1.49975	1.35579	1.66766	1.41229	1.45866	1.93565	1.17562	1.26115	0.931489
ENSMUSG00000059049	775.743	814.545	724.508	624.558	624.916	762.426	875.912	489.604	532.405	583.152	588.242	622.613	580.305	579.223	0.37461	2.4098e-07	2.9431e-06	Frem1	chr4	-	82897920	83052339	9690	protein_coding	Fras1_related_extracellular_matrix_protein_1	742	943	851	620	517	799	1100	533	483	596	503	650	484	580	3.8091	3.97006	3.53745	3.02012	3.03507	3.67762	4.34181	2.25736	2.39391	2.66666
ENSMUSG00000028597	73.1833	59.6009	63.8521	47.3455	65.2717	61.0704	55.7399	56.952	44.0915	40.1161	58.4734	37.3568	32.3724	42.9424	0.3742	0.0045516	0.019185	Gpx7	chr4	-	108400390	108406961	1289	protein_coding	glutathione_peroxidase_7	70	69	75	47	54	64	70	62	40	41	50	39	27	43	2.70139	2.18376	2.34365	1.72108	2.3831	2.21447	2.07705	1.97395	1.49036	1.37904
ENSMUSG00000028631	148.458	142.524	163.461	182.331	149.883	178.44	165.627	104.718	102.513	134.047	189.454	109.197	119.898	85.8849	0.37417	0.001464	0.0073699	Kcnq4	chr4	-	120696138	120748612	3919	protein_coding	potassium_voltage-gated_channel_subfamily_Q_member_4	142	165	192	181	124	187	208	114	93	137	162	114	100	86	1.80242	1.71758	1.97338	2.18002	1.7999	2.12819	2.02997	1.19379	1.1397	1.51562
ENSMUSG00000038349	714.06	818	878.605	798.83	790.513	899.834	797.877	594.322	590.827	635.009	699.341	667.632	603.086	583.218	0.37377	3.6699e-11	7.511e-10	Plcl1	chr1	+	55405921	55754285	6580	protein_coding	phospholipase_C-like_1	683	947	1032	793	654	943	1002	647	536	649	598	697	503	584	5.16341	5.87128	6.3174	5.68858	5.65397	6.39189	5.8243	4.0353	3.91222	4.27626
ENSMUSG00000035773	167.276	173.62	201.773	204.492	186.145	151.722	202.256	137.787	126.763	130.133	130.98	163.795	117.5	165.778	0.37311	6.0538e-05	0.00045706	Kiss1r	chr10	+	79916971	79922273	3163	protein_coding	KISS1_receptor	160	201	237	203	154	159	254	150	115	133	112	171	98	166	2.5163	2.59242	3.0181	3.02938	2.76964	2.24203	3.0714	1.94621	1.74616	1.82305
ENSMUSG00000026837	283.324	211.626	233.273	216.581	244.165	222.334	258.792	160.752	141.093	213.3	205.826	145.596	224.209	172.768	0.37288	0.00015361	0.0010332	Col5a1	chr2	+	27886425	28039514	8406	protein_coding	collagen_type_V_alpha_1	271	245	274	215	202	233	325	175	128	218	176	152	187	173	1.60369	1.18901	1.31294	1.20727	1.36698	1.23626	1.47875	0.854369	0.731316	1.12438
ENSMUSG00000022587	963.929	1017.53	875.199	886.469	928.309	807.275	901.393	712.819	670.191	776.883	651.393	623.57	706.198	750.993	0.37258	9.0135e-11	1.7599e-09	Ly6e	chr15	+	74955051	74959905	2281	protein_coding	lymphocyte_antigen_6_complex_locus_E	922	1178	1028	880	768	846	1132	776	608	794	557	651	589	752	20.107	21.0683	18.1532	18.2102	19.153	16.542	18.9812	13.9615	12.8016	15.0918
ENSMUSG00000087260	883.427	888.83	956.079	887.477	960.945	1098.31	801.858	676.076	596.338	760.25	694.664	697.326	722.984	805.919	0.37212	2.9214e-08	4.0738e-07	Lamtor5	chr3	+	107278858	107284079	881	protein_coding	late_endosomal/lysosomal_adaptor_MAPK_and_MTOR_activator_5	845	1029	1123	881	795	1151	1007	736	541	777	594	728	603	807	47.7114	47.6484	51.3438	47.2016	51.3325	58.2697	43.7175	34.2846	29.4921	38.2376
ENSMUSG00000035509	102.457	107.973	91.947	88.6469	58.0193	99.2394	109.091	64.3007	83.7739	47.9437	77.1848	61.3034	82.7295	74.8996	0.37208	0.0031666	0.014183	Fbxl21	chr13	+	56522472	56537898	3507	protein_coding	F-box_and_leucine-rich_repeat_protein_21	98	125	108	88	48	104	137	70	76	49	66	64	69	75	1.39006	1.45406	1.24043	1.18441	0.778586	1.32264	1.49412	0.819142	1.04079	0.605768
ENSMUSG00000001663	410.872	420.661	399.288	326.382	356.577	344.475	406.901	330.689	273.368	299.403	326.281	239.466	270.969	296.602	0.37156	1.3835e-06	1.4693e-05	Gstt1	chr10	-	75783813	75798584	1105	protein_coding	glutathione_S-transferase_theta_1	393	487	469	324	295	361	511	360	248	306	279	250	226	297	17.6918	17.9794	17.096	13.8401	15.1866	14.571	17.6873	13.3702	10.7789	12.0062
[truncated: 1,631 more rows]
[truncated: 4 more columns]
