# Supplementary material for: Homeostatic plasticity in the retina is associated with maintenance of night vision during retinal degenerative disease
Source: eLife. 2020 Sep 22;9:e59422. doi: 10.7554/eLife.59422 (PMC7529457; doi:10.7554/eLife.59422)
Supplement: Supplementary file 5. [file elife-59422-supp5.xls]

## Sheet: HetvsWT_down_GOenrich_significa
Enrich_Category	Category	GOID	Description	GeneRatio	BgRatio	pvalue	padj	geneID	geneName	Count
GO	CC	GO:0044441	ciliary part	126/2279	423/17165	1.94865e-19	1.41277e-16	ENSMUSG00000002486/ENSMUSG00000003354/ENSMUSG00000006007/ENSMUSG00000006464/ENSMUSG00000009828/ENSMUSG00000010136/ENSMUSG00000019952/ENSMUSG00000019971/ENSMUSG00000019986/ENSMUSG00000020486/ENSMUSG00000020895/ENSMUSG00000020930/ENSMUSG00000021013/ENSMUSG00000021270/ENSMUSG00000021693/ENSMUSG00000021803/ENSMUSG00000021918/ENSMUSG00000021983/ENSMUSG00000022621/ENSMUSG00000022677/ENSMUSG00000022911/…	Tchp/Ccdc65/Pdc/Bbs1/Ick/Pifo/Poc1b/Cep290/Ahi1/Sept4/Tmem107/Ccdc103/Ttc8/Hsp90aa1/Kif2a/Cdhr1/Nek4/Atp8a2/Rabl2/Fopnl/Arl13b/Rttn/Cep89/Poc1a/Prph2/Guca1b/Guca1a/Dync2li1/Arl3/Pde6g/Rp1/Cenpf/Ush2a/Enkur/Mkks/Spef1/Ift80/Abca4/Odf2l/1700003M02Rik/Wdr65/Gnb1/Prom1/Rab28/Ift81/Pde6b/Gngt1/Cep41/Ttll3/Ift122/Rho/Aldoa/Cacna1f/Cetn2/Bbs2/Cngb1/Gtl3/Dnaaf1/Tmem231/Ddx6/Mns1/Lca5/Prkar2a/Rpgrip1l/Mks…	126
GO	BP	GO:0044782	cilium organization	100/2267	316/17047	1.34588e-17	7.43462e-14	ENSMUSG00000002486/ENSMUSG00000003354/ENSMUSG00000006464/ENSMUSG00000007867/ENSMUSG00000009828/ENSMUSG00000014859/ENSMUSG00000018199/ENSMUSG00000019952/ENSMUSG00000019971/ENSMUSG00000020878/ENSMUSG00000020895/ENSMUSG00000020930/ENSMUSG00000021013/ENSMUSG00000022621/ENSMUSG00000022677/ENSMUSG00000022911/ENSMUSG00000023066/ENSMUSG00000023072/ENSMUSG00000023345/ENSMUSG00000024253/ENSMUSG00000024666/…	Tchp/Ccdc65/Bbs1/Ift43/Ick/E2f4/Trove2/Poc1b/Cep290/Lrrc46/Tmem107/Ccdc103/Ttc8/Rabl2/Fopnl/Arl13b/Rttn/Cep89/Poc1a/Dync2li1/Tmem138/Tctn3/Arl3/Ablim1/Heatr2/Rp1/Sdccag8/Ttc17/Mkks/Ift80/Odf2l/1700003M02Rik/Ift74/Ift81/Cep41/Ttll3/Ift122/Tub/Bbs2/Gtl3/Dnaaf1/Tmem231/Mns1/Ttc21a/Cntrob/Stk36/Rpgrip1l/Ccp110/Mks1/Traf3ip1/2700049A03Rik/Ttc21b/Ccdc11/Iqcg/Fam179b/Bbs9/Nme5/Bbs7/Wdr19/Tbc1d32/Cep250/…	100
GO	CC	GO:0036064	ciliary basal body	55/2279	135/17165	1.77193e-15	6.42325e-13	ENSMUSG00000006464/ENSMUSG00000009828/ENSMUSG00000010136/ENSMUSG00000019952/ENSMUSG00000019971/ENSMUSG00000019986/ENSMUSG00000021013/ENSMUSG00000021918/ENSMUSG00000022677/ENSMUSG00000023066/ENSMUSG00000023345/ENSMUSG00000024253/ENSMUSG00000025035/ENSMUSG00000026605/ENSMUSG00000026609/ENSMUSG00000027274/ENSMUSG00000027778/ENSMUSG00000028256/ENSMUSG00000029128/ENSMUSG00000029469/ENSMUSG00000029790/…	Bbs1/Ick/Pifo/Poc1b/Cep290/Ahi1/Ttc8/Nek4/Fopnl/Rttn/Poc1a/Dync2li1/Arl3/Cenpf/Ush2a/Mkks/Ift80/Odf2l/Rab28/Ift81/Cep41/Ift122/Cetn2/Bbs2/Gtl3/Lca5/Rpgrip1l/Mks1/Traf3ip1/2700049A03Rik/Fam179b/Bbs9/Topors/Bbs7/Cep250/Ift172/Fam154b/Whrn/Ift88/Gas8/Ofd1/Ccdc66/Tapt1/Fank1/Ccdc176/Arhgap35/Intu/Armc9/Bbs5/Mapk15/Alms1/Wdr90/Ttc30a1/Ttc30b/Ttbk2	55
GO	BP	GO:0060271	cilium assembly	92/2267	291/17047	2.90442e-16	8.02202e-13	ENSMUSG00000002486/ENSMUSG00000003354/ENSMUSG00000006464/ENSMUSG00000007867/ENSMUSG00000009828/ENSMUSG00000014859/ENSMUSG00000018199/ENSMUSG00000019952/ENSMUSG00000019971/ENSMUSG00000020878/ENSMUSG00000020895/ENSMUSG00000020930/ENSMUSG00000021013/ENSMUSG00000022621/ENSMUSG00000022677/ENSMUSG00000022911/ENSMUSG00000023072/ENSMUSG00000023345/ENSMUSG00000024253/ENSMUSG00000024666/ENSMUSG00000025008/…	Tchp/Ccdc65/Bbs1/Ift43/Ick/E2f4/Trove2/Poc1b/Cep290/Lrrc46/Tmem107/Ccdc103/Ttc8/Rabl2/Fopnl/Arl13b/Cep89/Poc1a/Dync2li1/Tmem138/Tctn3/Arl3/Ablim1/Heatr2/Rp1/Sdccag8/Mkks/Ift80/Odf2l/1700003M02Rik/Ift74/Ift81/Cep41/Ttll3/Ift122/Bbs2/Gtl3/Dnaaf1/Tmem231/Mns1/Cntrob/Stk36/Rpgrip1l/Ccp110/Mks1/Traf3ip1/2700049A03Rik/Ccdc11/Iqcg/Fam179b/Bbs9/Nme5/Bbs7/Wdr19/Tbc1d32/Cep250/Ift172/Tctn1/Ccdc151/Wdr34/Cc…	92
GO	BP	GO:0006397	mRNA processing	115/2267	425/17047	1.84079e-14	3.38952e-11	ENSMUSG00000001767/ENSMUSG00000002052/ENSMUSG00000003435/ENSMUSG00000003660/ENSMUSG00000005609/ENSMUSG00000005682/ENSMUSG00000007670/ENSMUSG00000008373/ENSMUSG00000010554/ENSMUSG00000011960/ENSMUSG00000015165/ENSMUSG00000015748/ENSMUSG00000016018/ENSMUSG00000018379/ENSMUSG00000018974/ENSMUSG00000020719/ENSMUSG00000020850/ENSMUSG00000020929/ENSMUSG00000021012/ENSMUSG00000021134/ENSMUSG00000022023/…	Crnkl1/Supt6/Supt5/Snrnp200/Ctr9/Pan2/Khsrp/Prpf31/Mettl16/Ccnt1/Hnrnpl/Prpf3/Skiv2l2/Srsf1/Sart3/Ddx5/Prpf8/Eftud2/Zc3h14/Srsf5/Wbp4/Rbm26/Mbnl2/Mettl3/Acin1/Hsf1/Zcrb1/Son/Sympk/Srsf7/Iws1/Dhx16/Rbm27/Rbm22/Sf1/Cwf19l1/Cdc73/Cwc22/Clp1/Cstf3/Ahcyl1/Ddx20/2810403A07Rik/Mettl14/Ybx1/Srrm1/Sfpq/Srsf4/Tfip11/Zcchc8/Sfswap/Pan3/Tra2a/Ddx47/Rbbp6/Rnf40/Rbm10/Rbmx2/Rbmx/Scaf11/Ccar2/Cnot6l/Cpsf7/Dhx8/…	115
GO	CC	GO:0044450	microtubule organizing center part	60/2279	173/17165	4.85522e-13	1.17334e-10	ENSMUSG00000006464/ENSMUSG00000015149/ENSMUSG00000019952/ENSMUSG00000019971/ENSMUSG00000020212/ENSMUSG00000021013/ENSMUSG00000021671/ENSMUSG00000021693/ENSMUSG00000022677/ENSMUSG00000022833/ENSMUSG00000023066/ENSMUSG00000023072/ENSMUSG00000023345/ENSMUSG00000024811/ENSMUSG00000025228/ENSMUSG00000025758/ENSMUSG00000026504/ENSMUSG00000027496/ENSMUSG00000027959/ENSMUSG00000028256/ENSMUSG00000029790/…	Bbs1/Sirt2/Poc1b/Cep290/Mdm1/Ttc8/Poc5/Kif2a/Fopnl/Ccdc14/Rttn/Cep89/Poc1a/Tnks2/Actr1a/Plk4/Sdccag8/Aurka/Sass6/Odf2l/Cep41/Cetn2/Gtl3/Cep63/Cntrob/Cep350/Ccp110/Mks1/2700049A03Rik/Bbs9/Topors/Hook3/Cep85/Cntln/Mphosph9/Cep250/Fam154b/Akna/Cdk5rap2/Cep104/Ift88/Ofd1/Crocc/Wdr60/Spice1/Cep164/Ccdc66/Neurl4/Cep120/Sclt1/Tsga10/Bbs5/Mapk15/Alms1/Clasp1/Cep152/Fgfr1op/Wdr90/Ttbk2/Hspa1a	60
GO	CC	GO:0097733	photoreceptor cell cilium	42/2279	99/17165	7.33755e-13	1.32993e-10	ENSMUSG00000006007/ENSMUSG00000019971/ENSMUSG00000021013/ENSMUSG00000021803/ENSMUSG00000021983/ENSMUSG00000023978/ENSMUSG00000023979/ENSMUSG00000023982/ENSMUSG00000025035/ENSMUSG00000025386/ENSMUSG00000025900/ENSMUSG00000026609/ENSMUSG00000028125/ENSMUSG00000029064/ENSMUSG00000029086/ENSMUSG00000029491/ENSMUSG00000029663/ENSMUSG00000030323/ENSMUSG00000030324/ENSMUSG00000031142/ENSMUSG00000031347/…	Pdc/Cep290/Ttc8/Cdhr1/Atp8a2/Prph2/Guca1b/Guca1a/Arl3/Pde6g/Rp1/Ush2a/Abca4/Gnb1/Prom1/Pde6b/Gngt1/Ift122/Rho/Cacna1f/Cetn2/Cngb1/Lca5/Rpgrip1l/Nxnl1/Gnat1/Tbcc/Topors/Bbs7/Tulp1/Wdr19/Cep250/Whrn/Myrip/Rp1l1/Ccdc66/Rgs9bp/Rpgrip1/Cnga1/Lyar/Rom1/Gm11744	42
GO	CC	GO:0005814	centriole	49/2279	128/17165	1.00469e-12	1.33404e-10	ENSMUSG00000015149/ENSMUSG00000019952/ENSMUSG00000019971/ENSMUSG00000020212/ENSMUSG00000021013/ENSMUSG00000021671/ENSMUSG00000021693/ENSMUSG00000022677/ENSMUSG00000023066/ENSMUSG00000023072/ENSMUSG00000023345/ENSMUSG00000025228/ENSMUSG00000025758/ENSMUSG00000026504/ENSMUSG00000027496/ENSMUSG00000027959/ENSMUSG00000028256/ENSMUSG00000029790/ENSMUSG00000031347/ENSMUSG00000031796/ENSMUSG00000032534/…	Sirt2/Poc1b/Cep290/Mdm1/Ttc8/Poc5/Kif2a/Fopnl/Rttn/Cep89/Poc1a/Actr1a/Plk4/Sdccag8/Aurka/Sass6/Odf2l/Cep41/Cetn2/Gtl3/Cep63/Cntrob/Cep350/Ccp110/Mks1/2700049A03Rik/Topors/Cntln/Mphosph9/Cep250/Fam154b/Akna/Cep104/Ift88/Ofd1/Crocc/Spice1/Cep164/Neurl4/Cep120/Sclt1/Tsga10/Mapk15/Alms1/Cep152/Fgfr1op/Wdr90/Ttbk2/Hspa1a	49
GO	CC	GO:0097731	9+0 non-motile cilium	42/2279	100/17165	1.10403e-12	1.33404e-10	ENSMUSG00000006007/ENSMUSG00000019971/ENSMUSG00000021013/ENSMUSG00000021803/ENSMUSG00000021983/ENSMUSG00000023978/ENSMUSG00000023979/ENSMUSG00000023982/ENSMUSG00000025035/ENSMUSG00000025386/ENSMUSG00000025900/ENSMUSG00000026609/ENSMUSG00000028125/ENSMUSG00000029064/ENSMUSG00000029086/ENSMUSG00000029491/ENSMUSG00000029663/ENSMUSG00000030323/ENSMUSG00000030324/ENSMUSG00000031142/ENSMUSG00000031347/…	Pdc/Cep290/Ttc8/Cdhr1/Atp8a2/Prph2/Guca1b/Guca1a/Arl3/Pde6g/Rp1/Ush2a/Abca4/Gnb1/Prom1/Pde6b/Gngt1/Ift122/Rho/Cacna1f/Cetn2/Cngb1/Lca5/Rpgrip1l/Nxnl1/Gnat1/Tbcc/Topors/Bbs7/Tulp1/Wdr19/Cep250/Whrn/Myrip/Rp1l1/Ccdc66/Rgs9bp/Rpgrip1/Cnga1/Lyar/Rom1/Gm11744	42
GO	CC	GO:0097730	non-motile cilium	49/2279	132/17165	3.82845e-12	3.96518e-10	ENSMUSG00000006007/ENSMUSG00000019971/ENSMUSG00000020212/ENSMUSG00000021013/ENSMUSG00000021803/ENSMUSG00000021983/ENSMUSG00000022911/ENSMUSG00000023072/ENSMUSG00000023978/ENSMUSG00000023979/ENSMUSG00000023982/ENSMUSG00000025035/ENSMUSG00000025386/ENSMUSG00000025900/ENSMUSG00000026609/ENSMUSG00000027274/ENSMUSG00000028125/ENSMUSG00000029064/ENSMUSG00000029086/ENSMUSG00000029491/ENSMUSG00000029663/…	Pdc/Cep290/Mdm1/Ttc8/Cdhr1/Atp8a2/Arl13b/Cep89/Prph2/Guca1b/Guca1a/Arl3/Pde6g/Rp1/Ush2a/Mkks/Abca4/Gnb1/Prom1/Pde6b/Gngt1/Ift122/Rho/Cacna1f/Cetn2/Cngb1/Lca5/Rpgrip1l/Nxnl1/Gnat1/Tbcc/Topors/Bbs7/Tulp1/Wdr19/Ano2/Cep250/Whrn/A330021E22Rik/Myrip/Rp1l1/Ccdc66/Rgs9bp/Elmod3/Rpgrip1/Cnga1/Lyar/Rom1/Gm11744	49
GO	CC	GO:0001750	photoreceptor outer segment	31/2279	75/17165	1.59436e-09	1.44489e-07	ENSMUSG00000006007/ENSMUSG00000019971/ENSMUSG00000021803/ENSMUSG00000021983/ENSMUSG00000023978/ENSMUSG00000023979/ENSMUSG00000023982/ENSMUSG00000025386/ENSMUSG00000025900/ENSMUSG00000028125/ENSMUSG00000029064/ENSMUSG00000029086/ENSMUSG00000029491/ENSMUSG00000029663/ENSMUSG00000030324/ENSMUSG00000031142/ENSMUSG00000031789/ENSMUSG00000034829/ENSMUSG00000034837/ENSMUSG00000037325/ENSMUSG00000037446/…	Pdc/Cep290/Cdhr1/Atp8a2/Prph2/Guca1b/Guca1a/Pde6g/Rp1/Abca4/Gnb1/Prom1/Pde6b/Gngt1/Rho/Cacna1f/Cngb1/Nxnl1/Gnat1/Bbs7/Tulp1/Wdr19/Cep250/Myrip/Rp1l1/Ccdc66/Rgs9bp/Cnga1/Lyar/Rom1/Gm11744	31
GO	CC	GO:0035869	ciliary transition zone	28/2279	66/17165	4.84489e-09	3.90283e-07	ENSMUSG00000019971/ENSMUSG00000020895/ENSMUSG00000021013/ENSMUSG00000021918/ENSMUSG00000024253/ENSMUSG00000025035/ENSMUSG00000025900/ENSMUSG00000026609/ENSMUSG00000030323/ENSMUSG00000031347/ENSMUSG00000031951/ENSMUSG00000032258/ENSMUSG00000033282/ENSMUSG00000034121/ENSMUSG00000034292/ENSMUSG00000034837/ENSMUSG00000035919/ENSMUSG00000036430/ENSMUSG00000036822/ENSMUSG00000037890/ENSMUSG00000038593/…	Cep290/Tmem107/Ttc8/Nek4/Dync2li1/Arl3/Rp1/Ush2a/Ift122/Cetn2/Tmem231/Lca5/Rpgrip1l/Mks1/Traf3ip1/Gnat1/Bbs9/Tbcc/Topors/Wdr19/Tctn1/Whrn/Cc2d2a/D1Ertd622e/Rp1l1/Tmem67/Rpgrip1/Ttbk2	28
GO	BP	GO:0008380	RNA splicing	89/2267	346/17047	3.09902e-10	4.27975e-07	ENSMUSG00000001767/ENSMUSG00000002052/ENSMUSG00000003660/ENSMUSG00000007670/ENSMUSG00000008373/ENSMUSG00000010554/ENSMUSG00000015165/ENSMUSG00000015748/ENSMUSG00000016018/ENSMUSG00000018379/ENSMUSG00000018974/ENSMUSG00000020719/ENSMUSG00000020850/ENSMUSG00000020929/ENSMUSG00000021134/ENSMUSG00000022023/ENSMUSG00000022139/ENSMUSG00000022160/ENSMUSG00000022185/ENSMUSG00000022635/ENSMUSG00000022961/…	Crnkl1/Supt6/Snrnp200/Khsrp/Prpf31/Mettl16/Hnrnpl/Prpf3/Skiv2l2/Srsf1/Sart3/Ddx5/Prpf8/Eftud2/Srsf5/Wbp4/Mbnl2/Mettl3/Acin1/Zcrb1/Son/Ivns1abp/Srsf7/Iws1/Dhx16/Rbm22/Sf1/Cwf19l1/Cwc22/Clp1/Ddx20/2810403A07Rik/Mettl14/Ybx1/Sfpq/Srsf4/Tfip11/Zcchc8/Sfswap/Tra2a/Ddx47/Rbm10/Rbmx2/Rbmx/Scaf11/Ccar2/Dhx8/Gcfc2/Ythdc1/Sugp2/Rnf113a1/Thoc2/Dhx38/Scaf1/Hnrnpu/Prkrip1/Aqr/1110037F02Rik/Esrp1/Cdk13/Pik3r1/…	89
GO	BP	GO:0050953	sensory perception of light stimulus	50/2267	156/17047	1.0515e-09	1.13798e-06	ENSMUSG00000002058/ENSMUSG00000006007/ENSMUSG00000006464/ENSMUSG00000020599/ENSMUSG00000020890/ENSMUSG00000020907/ENSMUSG00000021123/ENSMUSG00000021396/ENSMUSG00000021983/ENSMUSG00000023978/ENSMUSG00000023979/ENSMUSG00000023982/ENSMUSG00000024519/ENSMUSG00000024575/ENSMUSG00000024842/ENSMUSG00000025386/ENSMUSG00000025900/ENSMUSG00000026239/ENSMUSG00000026609/ENSMUSG00000026663/ENSMUSG00000028125/…	Unc119/Pdc/Bbs1/Rgs9/Gucy2e/Rcvrn/Rdh12/Nxnl2/Atp8a2/Prph2/Guca1b/Guca1a/Cplx4/Pde6a/Cabp4/Pde6g/Rp1/Pde6d/Ush2a/Atf6/Abca4/Ppef2/Pde6b/Rho/Cacna1f/Rs1/Grk1/Bbs2/Cngb1/Impg1/Slc24a1/Gnat1/Reep6/Tulp1/Cep250/Whrn/Cacna2d4/Rbp3/Crx/Gucy2f/Rp1l1/Ccdc66/Rdh8/Rgs9bp/Rpgrip1/Cacnb2/Cnga1/Rom1/Gm11744/Lrit3	50
GO	BP	GO:0007601	visual perception	49/2267	152/17047	1.23604e-09	1.13798e-06	ENSMUSG00000002058/ENSMUSG00000006007/ENSMUSG00000006464/ENSMUSG00000020599/ENSMUSG00000020890/ENSMUSG00000020907/ENSMUSG00000021123/ENSMUSG00000021396/ENSMUSG00000021983/ENSMUSG00000023978/ENSMUSG00000023979/ENSMUSG00000023982/ENSMUSG00000024519/ENSMUSG00000024575/ENSMUSG00000024842/ENSMUSG00000025386/ENSMUSG00000025900/ENSMUSG00000026239/ENSMUSG00000026609/ENSMUSG00000026663/ENSMUSG00000028125/…	Unc119/Pdc/Bbs1/Rgs9/Gucy2e/Rcvrn/Rdh12/Nxnl2/Atp8a2/Prph2/Guca1b/Guca1a/Cplx4/Pde6a/Cabp4/Pde6g/Rp1/Pde6d/Ush2a/Atf6/Abca4/Ppef2/Pde6b/Rho/Cacna1f/Rs1/Grk1/Bbs2/Cngb1/Impg1/Slc24a1/Gnat1/Reep6/Tulp1/Cep250/Cacna2d4/Rbp3/Crx/Gucy2f/Rp1l1/Ccdc66/Rdh8/Rgs9bp/Rpgrip1/Cacnb2/Cnga1/Rom1/Gm11744/Lrit3	49
GO	BP	GO:1903311	regulation of mRNA metabolic process	65/2267	231/17047	1.65771e-09	1.30817e-06	ENSMUSG00000002052/ENSMUSG00000003435/ENSMUSG00000005609/ENSMUSG00000007670/ENSMUSG00000010554/ENSMUSG00000011960/ENSMUSG00000015165/ENSMUSG00000018379/ENSMUSG00000018974/ENSMUSG00000020576/ENSMUSG00000020594/ENSMUSG00000020719/ENSMUSG00000021012/ENSMUSG00000021134/ENSMUSG00000022139/ENSMUSG00000022185/ENSMUSG00000022556/ENSMUSG00000022961/ENSMUSG00000023495/ENSMUSG00000024097/ENSMUSG00000024384/…	Supt6/Supt5/Ctr9/Khsrp/Mettl16/Ccnt1/Hnrnpl/Srsf1/Sart3/Nbas/Pum2/Ddx5/Zc3h14/Srsf5/Mbnl2/Acin1/Hsf1/Son/Pcbp4/Srsf7/Iws1/Cdc73/Angel2/Myef2/Ahcyl1/Mettl14/Pum1/Ybx1/Srsf4/Mtor/Sfswap/Rnf40/Rbm10/Rbmx/Cnot6l/Cpsf7/Secisbp2/Ythdc1/Cnot1/Ago2/Papd5/Tob1/Hnrnpu/1110037F02Rik/Tardbp/Rbm7/Leo1/Gtpbp1/Safb2/Alkbh5/Pde12/Cirbp/Hnrnpa1/Ythdf3/Tnrc6b/Gigyf2/Rbm15/Ddx17/Upf1/Hnrnpm/Wtap/Hnrnpr/Nanos1/Rbm15…	65
GO	BP	GO:0009314	response to radiation	99/2267	420/17047	5.1307e-09	3.54275e-06	ENSMUSG00000002413/ENSMUSG00000002948/ENSMUSG00000003068/ENSMUSG00000004655/ENSMUSG00000005089/ENSMUSG00000005705/ENSMUSG00000014426/ENSMUSG00000017146/ENSMUSG00000018199/ENSMUSG00000020038/ENSMUSG00000020063/ENSMUSG00000020366/ENSMUSG00000020381/ENSMUSG00000020413/ENSMUSG00000020661/ENSMUSG00000020694/ENSMUSG00000020907/ENSMUSG00000021668/ENSMUSG00000021670/ENSMUSG00000021684/ENSMUSG00000021694/…	Braf/Map2k7/Stk11/Aqp1/Slc1a2/Agrp/Map3k4/Brca1/Trove2/Cry1/Sirt1/Mapk9/3010026O09Rik/Hus1/Dnmt3a/Tlk2/Rcvrn/Polk/Hmgcr/Pde8b/Ercc8/Atp8a2/Fbxl3/Nipbl/Mettl3/Rad1/Xrcc6/Hsf1/Guca1b/Guca1a/Msh2/Map4k3/Ercc3/Ddb1/Cabp4/Rp1/Col3a1/Pde6d/1700007K13Rik/Mtch2/Rad51/Ect2/Trp53inp1/Fancg/B4galt2/Eya3/Ube4b/Mtor/Gnb1/Clock/Pde6b/Gngt1/Kras/Rho/Rad51ap1/Blm/Rrm1/Cacna1f/Brcc3/Rs1/Mecp2/Grk1/Cngb1/Bace1/Pia…	99
GO	BP	GO:0046530	photoreceptor cell differentiation	28/2267	67/17047	7.53854e-09	4.62699e-06	ENSMUSG00000006464/ENSMUSG00000019971/ENSMUSG00000021013/ENSMUSG00000021730/ENSMUSG00000021803/ENSMUSG00000022621/ENSMUSG00000024842/ENSMUSG00000025035/ENSMUSG00000025380/ENSMUSG00000025900/ENSMUSG00000028977/ENSMUSG00000029086/ENSMUSG00000029663/ENSMUSG00000031789/ENSMUSG00000032292/ENSMUSG00000034837/ENSMUSG00000037446/ENSMUSG00000038151/ENSMUSG00000040632/ENSMUSG00000041578/ENSMUSG00000043154/…	Bbs1/Cep290/Ttc8/Hcn1/Cdhr1/Rabl2/Cabp4/Arl3/Fscn2/Rp1/Casz1/Prom1/Gngt1/Cngb1/Nr2e3/Gnat1/Tulp1/Prdm1/Nrl/Crx/Ppp2r3a/Rp1l1/Ccdc66/Rpgrip1/2610301B20Rik/Crb1/Alms1/Rom1	28
GO	BP	GO:0120031	plasma membrane bounded cell projection assembly	107/2267	474/17047	1.51073e-08	8.34526e-06	ENSMUSG00000002486/ENSMUSG00000003354/ENSMUSG00000004655/ENSMUSG00000006127/ENSMUSG00000006464/ENSMUSG00000007867/ENSMUSG00000009828/ENSMUSG00000014859/ENSMUSG00000015766/ENSMUSG00000018199/ENSMUSG00000019952/ENSMUSG00000019971/ENSMUSG00000020669/ENSMUSG00000020739/ENSMUSG00000020878/ENSMUSG00000020895/ENSMUSG00000020930/ENSMUSG00000021013/ENSMUSG00000021270/ENSMUSG00000022621/ENSMUSG00000022677/…	Tchp/Ccdc65/Aqp1/Inpp5k/Bbs1/Ift43/Ick/E2f4/Eps8/Trove2/Poc1b/Cep290/Sh3yl1/Nup85/Lrrc46/Tmem107/Ccdc103/Ttc8/Hsp90aa1/Rabl2/Fopnl/Mylk/Arl13b/Cep89/Poc1a/Dync2li1/Dpysl3/Tmem138/Tctn3/Arl3/Ablim1/Heatr2/Rp1/Sdccag8/Mkks/Ift80/Odf2l/1700003M02Rik/Ift74/Mtor/Ift81/Wasf3/Cep41/Ttll3/Ift122/Bbs2/Gtl3/Dnaaf1/Tmem231/Mns1/Kank1/Cntrob/Ppp1r9a/Stk36/Rpgrip1l/Ccp110/Mks1/Traf3ip1/2700049A03Rik/Ccdc11/Iq…	107
GO	BP	GO:0007018	microtubule-based movement	69/2267	267/17047	2.4687e-08	1.06038e-05	ENSMUSG00000000738/ENSMUSG00000003354/ENSMUSG00000006464/ENSMUSG00000007867/ENSMUSG00000009828/ENSMUSG00000015222/ENSMUSG00000017686/ENSMUSG00000018707/ENSMUSG00000020930/ENSMUSG00000021693/ENSMUSG00000021843/ENSMUSG00000024253/ENSMUSG00000024301/ENSMUSG00000024480/ENSMUSG00000024795/ENSMUSG00000025035/ENSMUSG00000025228/ENSMUSG00000025241/ENSMUSG00000025857/ENSMUSG00000027115/ENSMUSG00000027274/…	Spg7/Ccdc65/Bbs1/Ift43/Ick/Map2/Rhot1/Dync1h1/Ccdc103/Kif2a/Ktn1/Dync2li1/Kifc5b/Ap3s1/Kif20b/Arl3/Actr1a/Fyco1/Heatr2/Kif18a/Mkks/Kif3b/Ift80/1700003M02Rik/Ift74/Sfpq/Prkcz/Wdr66/Ift81/Ift122/Tub/Mecp2/Lamp1/Bbs2/Kifc3/Gtl3/Dnaaf1/Ttc21a/Trak1/Stk36/Traf3ip1/Ttc21b/Wdr78/Ccdc11/Nme5/Kif15/Wdr19/Bicd2/Ift172/Mreg/Hnrnpu/Ccdc151/Gas8/Ulk4/Dpcd/Ccdc64/Kif21b/Wdr60/Tmem108/Wdr63/Tmem201/Dync2h1/Dnah…	69
GO	BP	GO:0030031	cell projection assembly	108/2267	484/17047	2.48189e-08	1.06038e-05	ENSMUSG00000002486/ENSMUSG00000003354/ENSMUSG00000004655/ENSMUSG00000006127/ENSMUSG00000006464/ENSMUSG00000007867/ENSMUSG00000009828/ENSMUSG00000014859/ENSMUSG00000015766/ENSMUSG00000018199/ENSMUSG00000019952/ENSMUSG00000019971/ENSMUSG00000020669/ENSMUSG00000020739/ENSMUSG00000020878/ENSMUSG00000020895/ENSMUSG00000020930/ENSMUSG00000021013/ENSMUSG00000021270/ENSMUSG00000022621/ENSMUSG00000022677/…	Tchp/Ccdc65/Aqp1/Inpp5k/Bbs1/Ift43/Ick/E2f4/Eps8/Trove2/Poc1b/Cep290/Sh3yl1/Nup85/Lrrc46/Tmem107/Ccdc103/Ttc8/Hsp90aa1/Rabl2/Fopnl/Mylk/Arl13b/Cep89/Poc1a/Dync2li1/Dpysl3/Tmem138/Tctn3/Arl3/Ablim1/Heatr2/Rp1/Sdccag8/Mkks/Ift80/Odf2l/1700003M02Rik/Ift74/Mtor/Ift81/Wasf3/Cep41/Ttll3/Ift122/Bbs2/Gtl3/Dnaaf1/Tmem231/Mns1/Kank1/Cntrob/Ppp1r9a/Stk36/Rpgrip1l/Ccp110/Mks1/Traf3ip1/2700049A03Rik/Ccdc11/Iq…	108
GO	BP	GO:0009583	detection of light stimulus	22/2267	47/17047	2.49545e-08	1.06038e-05	ENSMUSG00000020907/ENSMUSG00000021983/ENSMUSG00000023979/ENSMUSG00000023982/ENSMUSG00000024842/ENSMUSG00000026239/ENSMUSG00000029064/ENSMUSG00000029491/ENSMUSG00000029663/ENSMUSG00000030324/ENSMUSG00000031142/ENSMUSG00000031293/ENSMUSG00000031450/ENSMUSG00000031789/ENSMUSG00000034837/ENSMUSG00000035504/ENSMUSG00000037446/ENSMUSG00000038241/ENSMUSG00000041460/ENSMUSG00000042282/ENSMUSG00000046753/…	Rcvrn/Atp8a2/Guca1b/Guca1a/Cabp4/Pde6d/Gnb1/Pde6b/Gngt1/Rho/Cacna1f/Rs1/Grk1/Cngb1/Gnat1/Reep6/Tulp1/Cep250/Cacna2d4/Gucy2f/Ccdc66/Rgs9bp	22
GO	CC	GO:0000922	spindle pole	45/2279	154/17165	1.4942e-07	1.08329e-05	ENSMUSG00000002058/ENSMUSG00000004221/ENSMUSG00000004364/ENSMUSG00000018372/ENSMUSG00000019952/ENSMUSG00000021693/ENSMUSG00000022556/ENSMUSG00000023072/ENSMUSG00000023345/ENSMUSG00000024073/ENSMUSG00000024795/ENSMUSG00000024974/ENSMUSG00000025420/ENSMUSG00000025862/ENSMUSG00000026605/ENSMUSG00000027331/ENSMUSG00000027459/ENSMUSG00000027496/ENSMUSG00000027883/ENSMUSG00000028229/ENSMUSG00000029910/…	Unc119/Ikbkg/Cul3/Cep95/Poc1b/Kif2a/Hsf1/Cep89/Poc1a/Birc6/Kif20b/Smc3/Katnal2/Stag2/Cenpf/Knstrn/Fam110a/Aurka/Gpsm2/Rmdn1/Mad2l1/Brcc3/Cep63/Ddx11/Aaas/Topors/Cep85/Cep44/Cep250/Cdk5rap2/Cep104/Hnrnpu/Lats1/Katnal1/Haus1/Wdr60/Bod1/Tmem201/Ckap2l/Map10/Eml1/Alms1/Psrc1/Rmdn3/Kifc1	45
GO	BP	GO:0034655	nucleobase-containing compound catabolic process	93/2267	400/17047	3.02724e-08	1.19446e-05	ENSMUSG00000000628/ENSMUSG00000001415/ENSMUSG00000005682/ENSMUSG00000007670/ENSMUSG00000010554/ENSMUSG00000011752/ENSMUSG00000014907/ENSMUSG00000016018/ENSMUSG00000017264/ENSMUSG00000018501/ENSMUSG00000020079/ENSMUSG00000020108/ENSMUSG00000020346/ENSMUSG00000020362/ENSMUSG00000020495/ENSMUSG00000020576/ENSMUSG00000020594/ENSMUSG00000020719/ENSMUSG00000021012/ENSMUSG00000021196/ENSMUSG00000021255/…	Hk2/Smg5/Pan2/Khsrp/Mettl16/Pgam1/Naf1/Skiv2l2/Exosc10/Ncor1/Supv3l1/Ddit4/Mgat1/Cnot6/Smg8/Nbas/Pum2/Ddx5/Zc3h14/Pfkp/Esrrb/Pde8b/Rnaseh2b/Dcp1a/Ppara/Hsf1/Pcbp4/Lrpprc/Dnase1l2/Pde8a/Angel2/Myef2/Adal/Mtch2/Exosc8/Nudt17/Mettl14/Pum1/Ybx1/Ago3/Mtor/Ppargc1a/Pan3/Aldoa/Rbm10/Acat1/Pkm/Xrn1/Nt5e/Mlh1/Dis3/Eri3/Dak/Cnot6l/Secisbp2/Cnot1/Upf3b/Ago2/Papd5/Tob1/9630033F20Rik/Foxk2/Exosc2/Hnrnpu/Apobe…	93
GO	BP	GO:0006401	RNA catabolic process	59/2267	217/17047	3.62447e-08	1.30941e-05	ENSMUSG00000001415/ENSMUSG00000005682/ENSMUSG00000007670/ENSMUSG00000010554/ENSMUSG00000014907/ENSMUSG00000016018/ENSMUSG00000017264/ENSMUSG00000020079/ENSMUSG00000020362/ENSMUSG00000020495/ENSMUSG00000020576/ENSMUSG00000020594/ENSMUSG00000020719/ENSMUSG00000021012/ENSMUSG00000021932/ENSMUSG00000021962/ENSMUSG00000023495/ENSMUSG00000024120/ENSMUSG00000026634/ENSMUSG00000027201/ENSMUSG00000027752/…	Smg5/Pan2/Khsrp/Mettl16/Naf1/Skiv2l2/Exosc10/Supv3l1/Cnot6/Smg8/Nbas/Pum2/Ddx5/Zc3h14/Rnaseh2b/Dcp1a/Pcbp4/Lrpprc/Angel2/Myef2/Exosc8/Mettl14/Pum1/Ybx1/Ago3/Mtor/Pan3/Rbm10/Xrn1/Mlh1/Dis3/Cnot6l/Secisbp2/Cnot1/Upf3b/Ago2/Papd5/Tob1/Exosc2/Hnrnpu/Dicer1/Tardbp/Papd4/Gtpbp1/Alkbh5/Pde12/Cirbp/Ythdf3/Tnrc6b/Gigyf2/Ctif/Cnot10/Upf1/Hnrnpm/Hnrnpr/Csde1/Nanos1/Casc3/Hspa1a	59
GO	BP	GO:0006402	mRNA catabolic process	53/2267	187/17047	3.97761e-08	1.30941e-05	ENSMUSG00000001415/ENSMUSG00000005682/ENSMUSG00000007670/ENSMUSG00000010554/ENSMUSG00000017264/ENSMUSG00000020079/ENSMUSG00000020362/ENSMUSG00000020495/ENSMUSG00000020576/ENSMUSG00000020594/ENSMUSG00000020719/ENSMUSG00000021012/ENSMUSG00000021962/ENSMUSG00000023495/ENSMUSG00000026634/ENSMUSG00000027201/ENSMUSG00000027752/ENSMUSG00000028114/ENSMUSG00000028580/ENSMUSG00000028639/ENSMUSG00000028842/…	Smg5/Pan2/Khsrp/Mettl16/Exosc10/Supv3l1/Cnot6/Smg8/Nbas/Pum2/Ddx5/Zc3h14/Dcp1a/Pcbp4/Angel2/Myef2/Exosc8/Mettl14/Pum1/Ybx1/Ago3/Mtor/Pan3/Rbm10/Xrn1/Mlh1/Cnot6l/Secisbp2/Cnot1/Upf3b/Ago2/Papd5/Tob1/Exosc2/Hnrnpu/Tardbp/Papd4/Gtpbp1/Alkbh5/Pde12/Cirbp/Ythdf3/Tnrc6b/Gigyf2/Ctif/Cnot10/Upf1/Hnrnpm/Hnrnpr/Csde1/Nanos1/Casc3/Hspa1a	53
GO	BP	GO:0042461	photoreceptor cell development	22/2267	48/17047	4.02967e-08	1.30941e-05	ENSMUSG00000006464/ENSMUSG00000019971/ENSMUSG00000021730/ENSMUSG00000021803/ENSMUSG00000022621/ENSMUSG00000024842/ENSMUSG00000025035/ENSMUSG00000025380/ENSMUSG00000025900/ENSMUSG00000029663/ENSMUSG00000031789/ENSMUSG00000032292/ENSMUSG00000034837/ENSMUSG00000037446/ENSMUSG00000038151/ENSMUSG00000040632/ENSMUSG00000046049/ENSMUSG00000046753/ENSMUSG00000057132/ENSMUSG00000059482/ENSMUSG00000063681/…	Bbs1/Cep290/Hcn1/Cdhr1/Rabl2/Cabp4/Arl3/Fscn2/Rp1/Gngt1/Cngb1/Nr2e3/Gnat1/Tulp1/Prdm1/Nrl/Rp1l1/Ccdc66/Rpgrip1/2610301B20Rik/Crb1/Alms1	22
GO	BP	GO:0006281	DNA repair	101/2267	449/17047	4.61573e-08	1.41652e-05	ENSMUSG00000000028/ENSMUSG00000002835/ENSMUSG00000006288/ENSMUSG00000006599/ENSMUSG00000007035/ENSMUSG00000007570/ENSMUSG00000007646/ENSMUSG00000010154/ENSMUSG00000014850/ENSMUSG00000015971/ENSMUSG00000017146/ENSMUSG00000017485/ENSMUSG00000020063/ENSMUSG00000020381/ENSMUSG00000020413/ENSMUSG00000020718/ENSMUSG00000020752/ENSMUSG00000020974/ENSMUSG00000021461/ENSMUSG00000021635/ENSMUSG00000021668/…	Cdc45/Chaf1a/Ttc5/Gtf2h1/Msh5/Fance/Rad51c/Spire2/Msh3/Actr8/Brca1/Top2b/Sirt1/3010026O09Rik/Hus1/Polg2/Recql5/Pole2/Fancc/Rad17/Polk/Ercc8/Nipbl/Rad1/Rad21/Xrcc6/Hsf1/Usp7/Smchd1/Msh2/Ercc3/Ddb1/Smc3/2310003H01Rik/Atrip/Ube2w/Trip12/Ube2t/Rad51/Mcm8/Mgme1/Chd1l/Fancg/Sfpq/Rpa2/Eya3/Cdc7/Aplf/Recql/Rad51ap1/Blm/Brcc3/Cetn2/Cul4a/Gins4/Usp10/Mre11a/Usp3/Mlh1/Exd2/Rfwd3/Polq/Smc4/Neil2/Fam175a/Helq…	101
GO	BP	GO:0010608	posttranscriptional regulation of gene expression	96/2267	423/17047	6.33212e-08	1.84098e-05	ENSMUSG00000000552/ENSMUSG00000005610/ENSMUSG00000007670/ENSMUSG00000010554/ENSMUSG00000014907/ENSMUSG00000015165/ENSMUSG00000015176/ENSMUSG00000015846/ENSMUSG00000018501/ENSMUSG00000019763/ENSMUSG00000020362/ENSMUSG00000020516/ENSMUSG00000020594/ENSMUSG00000020719/ENSMUSG00000020721/ENSMUSG00000020743/ENSMUSG00000020770/ENSMUSG00000020982/ENSMUSG00000021012/ENSMUSG00000021179/ENSMUSG00000021707/…	Zfp385a/Eif4g2/Khsrp/Mettl16/Naf1/Hnrnpl/Nolc1/Rxra/Ncor1/Rmnd1/Cnot6/Rps6kb1/Pum2/Ddx5/Helz/Mif4gd/Unk/Nemf/Zc3h14/Nrde2/Dhfr/Mettl3/Mief1/Larp4/Tarbp2/Pcbp4/Lrpprc/Rps6kb2/Usp16/Eif4e2/Epb4.1l5/Angel2/Uhmk1/Tsc1/Clp1/Nat10/Myef2/Cdk5rap1/Mettl14/Pum1/Ybx1/Ago3/Mtor/Sepsecs/Eif2b1/Mapkapk5/Igf2bp3/Kbtbd8/Cnbp/Rbm10/Mecp2/Ireb2/Xrn1/Cnot6l/Secisbp2/Tdrd7/Ythdc1/Cnot1/Upf3b/Ago2/Papd5/Rnf139/Tob1/…	96
GO	BP	GO:1905515	non-motile cilium assembly	25/2267	61/17047	7.57933e-08	2.09341e-05	ENSMUSG00000006464/ENSMUSG00000019971/ENSMUSG00000020895/ENSMUSG00000021013/ENSMUSG00000022911/ENSMUSG00000023072/ENSMUSG00000023345/ENSMUSG00000025900/ENSMUSG00000027274/ENSMUSG00000027778/ENSMUSG00000028576/ENSMUSG00000030323/ENSMUSG00000031755/ENSMUSG00000033282/ENSMUSG00000034121/ENSMUSG00000035614/ENSMUSG00000037325/ENSMUSG00000038122/ENSMUSG00000038241/ENSMUSG00000038564/ENSMUSG00000039765/…	Bbs1/Cep290/Tmem107/Ttc8/Arl13b/Cep89/Poc1a/Rp1/Mkks/Ift80/Ift74/Ift122/Bbs2/Rpgrip1l/Mks1/Fam179b/Bbs7/Tbc1d32/Cep250/Ift172/Cc2d2a/Dync2h1/Atmin/Intu/Ttbk2	25
GO	CC	GO:0005681	spliceosomal complex	49/2279	178/17165	3.22056e-07	2.12264e-05	ENSMUSG00000001767/ENSMUSG00000003360/ENSMUSG00000003660/ENSMUSG00000008373/ENSMUSG00000015748/ENSMUSG00000016018/ENSMUSG00000018379/ENSMUSG00000020719/ENSMUSG00000020850/ENSMUSG00000020929/ENSMUSG00000022023/ENSMUSG00000022635/ENSMUSG00000024422/ENSMUSG00000024604/ENSMUSG00000024949/ENSMUSG00000025200/ENSMUSG00000027014/ENSMUSG00000027193/ENSMUSG00000027201/ENSMUSG00000028060/ENSMUSG00000028639/…	Crnkl1/Ddx23/Snrnp200/Prpf31/Prpf3/Skiv2l2/Srsf1/Ddx5/Prpf8/Eftud2/Wbp4/Zcrb1/Dhx16/Rbm22/Sf1/Cwf19l1/Cwc22/Api5/Myef2/2810403A07Rik/Ybx1/Srrm1/Tfip11/Zcchc8/Rbmx2/Rbmx/Dhx8/Gcfc2/Rnf113a1/Dhx38/Hnrnpu/Prkrip1/Aqr/Hnrnpf/Zrsr1/Cirbp/Zfp830/Scaf8/Hnrnpa1/Snip1/Txnl4a/Upf1/Hnrnpm/Ppih/Prpf40a/Hnrnpr/Prpf4/Casc3/Rnf113a2	49
GO	BP	GO:0045494	photoreceptor cell maintenance	19/2267	39/17047	1.00486e-07	2.64325e-05	ENSMUSG00000006464/ENSMUSG00000019971/ENSMUSG00000020212/ENSMUSG00000021255/ENSMUSG00000021396/ENSMUSG00000021803/ENSMUSG00000025900/ENSMUSG00000026609/ENSMUSG00000027274/ENSMUSG00000028125/ENSMUSG00000029086/ENSMUSG00000030324/ENSMUSG00000031028/ENSMUSG00000031755/ENSMUSG00000031789/ENSMUSG00000034829/ENSMUSG00000037446/ENSMUSG00000040860/ENSMUSG00000046049	Bbs1/Cep290/Mdm1/Esrrb/Nxnl2/Cdhr1/Rp1/Ush2a/Mkks/Abca4/Prom1/Rho/Tub/Bbs2/Cngb1/Nxnl1/Tulp1/Crocc/Rp1l1	19
GO	BP	GO:0000375	RNA splicing, via transesterification reactions	62/2267	241/17047	1.48426e-07	3.39682e-05	ENSMUSG00000001767/ENSMUSG00000003660/ENSMUSG00000008373/ENSMUSG00000010554/ENSMUSG00000015165/ENSMUSG00000015748/ENSMUSG00000018379/ENSMUSG00000018974/ENSMUSG00000020719/ENSMUSG00000020850/ENSMUSG00000020929/ENSMUSG00000021134/ENSMUSG00000022023/ENSMUSG00000022139/ENSMUSG00000022160/ENSMUSG00000022185/ENSMUSG00000022635/ENSMUSG00000022961/ENSMUSG00000024097/ENSMUSG00000024422/ENSMUSG00000024604/…	Crnkl1/Snrnp200/Prpf31/Mettl16/Hnrnpl/Prpf3/Srsf1/Sart3/Ddx5/Prpf8/Eftud2/Srsf5/Wbp4/Mbnl2/Mettl3/Acin1/Zcrb1/Son/Srsf7/Dhx16/Rbm22/Sf1/Cwf19l1/Cwc22/Ddx20/2810403A07Rik/Mettl14/Sfpq/Srsf4/Tfip11/Sfswap/Tra2a/Rbm10/Rbmx2/Rbmx/Scaf11/Dhx8/Gcfc2/Ythdc1/Dhx38/Hnrnpu/Aqr/Esrp1/Cdk13/Rbm7/Zrsr1/Cirbp/Hnrnpa1/Rbm15/Snip1/Ddx17/Gemin6/Txnl4a/Hnrnpm/Wtap/Prpf40a/Srpk2/Prpf4/Rbm15b/Casc3/Usp49/Rnf113a2	62
GO	BP	GO:0000377	RNA splicing, via transesterification reactions with bulged adenosine as nucleophile	62/2267	241/17047	1.48426e-07	3.39682e-05	ENSMUSG00000001767/ENSMUSG00000003660/ENSMUSG00000008373/ENSMUSG00000010554/ENSMUSG00000015165/ENSMUSG00000015748/ENSMUSG00000018379/ENSMUSG00000018974/ENSMUSG00000020719/ENSMUSG00000020850/ENSMUSG00000020929/ENSMUSG00000021134/ENSMUSG00000022023/ENSMUSG00000022139/ENSMUSG00000022160/ENSMUSG00000022185/ENSMUSG00000022635/ENSMUSG00000022961/ENSMUSG00000024097/ENSMUSG00000024422/ENSMUSG00000024604/…	Crnkl1/Snrnp200/Prpf31/Mettl16/Hnrnpl/Prpf3/Srsf1/Sart3/Ddx5/Prpf8/Eftud2/Srsf5/Wbp4/Mbnl2/Mettl3/Acin1/Zcrb1/Son/Srsf7/Dhx16/Rbm22/Sf1/Cwf19l1/Cwc22/Ddx20/2810403A07Rik/Mettl14/Sfpq/Srsf4/Tfip11/Sfswap/Tra2a/Rbm10/Rbmx2/Rbmx/Scaf11/Dhx8/Gcfc2/Ythdc1/Dhx38/Hnrnpu/Aqr/Esrp1/Cdk13/Rbm7/Zrsr1/Cirbp/Hnrnpa1/Rbm15/Snip1/Ddx17/Gemin6/Txnl4a/Hnrnpm/Wtap/Prpf40a/Srpk2/Prpf4/Rbm15b/Casc3/Usp49/Rnf113a2	62
GO	BP	GO:0000398	mRNA splicing, via spliceosome	62/2267	241/17047	1.48426e-07	3.39682e-05	ENSMUSG00000001767/ENSMUSG00000003660/ENSMUSG00000008373/ENSMUSG00000010554/ENSMUSG00000015165/ENSMUSG00000015748/ENSMUSG00000018379/ENSMUSG00000018974/ENSMUSG00000020719/ENSMUSG00000020850/ENSMUSG00000020929/ENSMUSG00000021134/ENSMUSG00000022023/ENSMUSG00000022139/ENSMUSG00000022160/ENSMUSG00000022185/ENSMUSG00000022635/ENSMUSG00000022961/ENSMUSG00000024097/ENSMUSG00000024422/ENSMUSG00000024604/…	Crnkl1/Snrnp200/Prpf31/Mettl16/Hnrnpl/Prpf3/Srsf1/Sart3/Ddx5/Prpf8/Eftud2/Srsf5/Wbp4/Mbnl2/Mettl3/Acin1/Zcrb1/Son/Srsf7/Dhx16/Rbm22/Sf1/Cwf19l1/Cwc22/Ddx20/2810403A07Rik/Mettl14/Sfpq/Srsf4/Tfip11/Sfswap/Tra2a/Rbm10/Rbmx2/Rbmx/Scaf11/Dhx8/Gcfc2/Ythdc1/Dhx38/Hnrnpu/Aqr/Esrp1/Cdk13/Rbm7/Zrsr1/Cirbp/Hnrnpa1/Rbm15/Snip1/Ddx17/Gemin6/Txnl4a/Hnrnpm/Wtap/Prpf40a/Srpk2/Prpf4/Rbm15b/Casc3/Usp49/Rnf113a2	62
GO	BP	GO:0001895	retina homeostasis	22/2267	51/17047	1.5373e-07	3.39682e-05	ENSMUSG00000006464/ENSMUSG00000019952/ENSMUSG00000019971/ENSMUSG00000020212/ENSMUSG00000021255/ENSMUSG00000021396/ENSMUSG00000021803/ENSMUSG00000025900/ENSMUSG00000026609/ENSMUSG00000027274/ENSMUSG00000028125/ENSMUSG00000029086/ENSMUSG00000030324/ENSMUSG00000031028/ENSMUSG00000031755/ENSMUSG00000031789/ENSMUSG00000034829/ENSMUSG00000037446/ENSMUSG00000039137/ENSMUSG00000040860/ENSMUSG00000046049/…	Bbs1/Poc1b/Cep290/Mdm1/Esrrb/Nxnl2/Cdhr1/Rp1/Ush2a/Mkks/Abca4/Prom1/Rho/Tub/Bbs2/Cngb1/Nxnl1/Tulp1/Whrn/Crocc/Rp1l1/Ccdc66	22
GO	BP	GO:0051052	regulation of DNA metabolic process	94/2267	420/17047	1.72401e-07	3.66285e-05	ENSMUSG00000000530/ENSMUSG00000001415/ENSMUSG00000002052/ENSMUSG00000002948/ENSMUSG00000007589/ENSMUSG00000010154/ENSMUSG00000010517/ENSMUSG00000014426/ENSMUSG00000014850/ENSMUSG00000014907/ENSMUSG00000015697/ENSMUSG00000017146/ENSMUSG00000017264/ENSMUSG00000017485/ENSMUSG00000020063/ENSMUSG00000020381/ENSMUSG00000020413/ENSMUSG00000020752/ENSMUSG00000021149/ENSMUSG00000021270/ENSMUSG00000021635/…	Acvrl1/Smg5/Supt6/Map2k7/Tinf2/Spire2/Faf1/Map3k4/Msh3/Naf1/Setdb1/Brca1/Exosc10/Top2b/Sirt1/3010026O09Rik/Hus1/Recql5/Gtpbp4/Hsp90aa1/Rad17/Ercc8/Hmbox1/Rgcc/Cct5/Hsf1/Usp7/Tfrc/Senp2/Donson/Smchd1/Msh2/Esco1/Tnks2/Smc3/Stag2/Terf1/Trip12/Ilkap/Ttf1/Nat10/Cdan1/Rad51/Pik3ca/Rpa2/Eya3/Ppargc1a/Cdc7/Mapkapk5/Aplf/Atf7ip/Rad51ap1/Blm/Rbbp6/Brcc3/Mecp2/Cul4a/Mre11a/Mlh1/Usp37/Polq/Fam175a/Fignl1/Ddx…	94
GO	BP	GO:0044270	cellular nitrogen compound catabolic process	97/2267	439/17047	2.08295e-07	4.26157e-05	ENSMUSG00000000628/ENSMUSG00000001415/ENSMUSG00000005514/ENSMUSG00000005682/ENSMUSG00000007670/ENSMUSG00000010554/ENSMUSG00000011752/ENSMUSG00000014907/ENSMUSG00000016018/ENSMUSG00000017264/ENSMUSG00000018501/ENSMUSG00000020079/ENSMUSG00000020108/ENSMUSG00000020346/ENSMUSG00000020362/ENSMUSG00000020495/ENSMUSG00000020576/ENSMUSG00000020594/ENSMUSG00000020719/ENSMUSG00000021012/ENSMUSG00000021196/…	Hk2/Smg5/Por/Pan2/Khsrp/Mettl16/Pgam1/Naf1/Skiv2l2/Exosc10/Ncor1/Supv3l1/Ddit4/Mgat1/Cnot6/Smg8/Nbas/Pum2/Ddx5/Zc3h14/Pfkp/Esrrb/Pde8b/Rnaseh2b/Dcp1a/Ppara/Hsf1/Pcbp4/Lrpprc/Dnase1l2/Pde8a/Angel2/Myef2/Adal/Mtch2/Hdc/Exosc8/Nudt17/Mettl14/Pum1/Ybx1/Ago3/Mtor/Ppargc1a/Pan3/Aldoa/Rbm10/Acat1/Pkm/Xrn1/Nt5e/Mlh1/Dis3/Eri3/Dak/Cnot6l/Tet3/Secisbp2/Cnot1/Upf3b/Ago2/Papd5/Tob1/9630033F20Rik/Foxk2/Exosc2…	97
GO	CC	GO:0030990	intraciliary transport particle	15/2279	29/17165	8.28784e-07	5.00724e-05	ENSMUSG00000007867/ENSMUSG00000022621/ENSMUSG00000024253/ENSMUSG00000027778/ENSMUSG00000028576/ENSMUSG00000029469/ENSMUSG00000030323/ENSMUSG00000032514/ENSMUSG00000034292/ENSMUSG00000034848/ENSMUSG00000037890/ENSMUSG00000038564/ENSMUSG00000043621/ENSMUSG00000075271/ENSMUSG00000075273	Ift43/Rabl2/Dync2li1/Ift80/Ift74/Ift81/Ift122/Ttc21a/Traf3ip1/Ttc21b/Wdr19/Ift172/Ubxn10/Ttc30a1/Ttc30b	15
GO	BP	GO:0046700	heterocycle catabolic process	96/2267	444/17047	6.81962e-07	0.000134541	ENSMUSG00000000628/ENSMUSG00000001415/ENSMUSG00000005682/ENSMUSG00000007670/ENSMUSG00000010554/ENSMUSG00000011752/ENSMUSG00000014907/ENSMUSG00000016018/ENSMUSG00000017264/ENSMUSG00000018501/ENSMUSG00000020079/ENSMUSG00000020108/ENSMUSG00000020346/ENSMUSG00000020362/ENSMUSG00000020495/ENSMUSG00000020576/ENSMUSG00000020594/ENSMUSG00000020719/ENSMUSG00000021012/ENSMUSG00000021196/ENSMUSG00000021255/…	Hk2/Smg5/Pan2/Khsrp/Mettl16/Pgam1/Naf1/Skiv2l2/Exosc10/Ncor1/Supv3l1/Ddit4/Mgat1/Cnot6/Smg8/Nbas/Pum2/Ddx5/Zc3h14/Pfkp/Esrrb/Pde8b/Rnaseh2b/Dcp1a/Ppara/Hsf1/Pcbp4/Lrpprc/Dnase1l2/Pde8a/Angel2/Myef2/Adal/Mtch2/Hdc/Exosc8/Nudt17/Mettl14/Pum1/Ybx1/Ago3/Mtor/Ppargc1a/Pan3/Aldoa/Rbm10/Acat1/Pkm/Xrn1/Nt5e/Mlh1/Dis3/Eri3/Dak/Cnot6l/Tet3/Secisbp2/Cnot1/Upf3b/Ago2/Papd5/Tob1/9630033F20Rik/Foxk2/Exosc2/Hnr…	96
GO	BP	GO:0001754	eye photoreceptor cell differentiation	20/2267	47/17047	7.34124e-07	0.000139838	ENSMUSG00000019971/ENSMUSG00000021013/ENSMUSG00000021730/ENSMUSG00000024842/ENSMUSG00000025380/ENSMUSG00000025900/ENSMUSG00000028977/ENSMUSG00000029086/ENSMUSG00000029663/ENSMUSG00000032292/ENSMUSG00000034837/ENSMUSG00000037446/ENSMUSG00000038151/ENSMUSG00000040632/ENSMUSG00000043154/ENSMUSG00000046753/ENSMUSG00000057132/ENSMUSG00000063681/ENSMUSG00000063810/ENSMUSG00000071648	Cep290/Ttc8/Hcn1/Cabp4/Fscn2/Rp1/Casz1/Prom1/Gngt1/Nr2e3/Gnat1/Tulp1/Prdm1/Nrl/Ppp2r3a/Ccdc66/Rpgrip1/Crb1/Alms1/Rom1	20
GO	BP	GO:0006260	DNA replication	58/2267	231/17047	8.79688e-07	0.00016198	ENSMUSG00000000028/ENSMUSG00000000934/ENSMUSG00000002835/ENSMUSG00000004069/ENSMUSG00000010517/ENSMUSG00000020413/ENSMUSG00000020718/ENSMUSG00000020752/ENSMUSG00000020974/ENSMUSG00000021149/ENSMUSG00000021635/ENSMUSG00000021668/ENSMUSG00000022855/ENSMUSG00000022960/ENSMUSG00000024293/ENSMUSG00000024974/ENSMUSG00000025862/ENSMUSG00000025925/ENSMUSG00000026283/ENSMUSG00000026309/ENSMUSG00000026669/…	Cdc45/Top1mt/Chaf1a/Dnaja3/Faf1/Hus1/Polg2/Recql5/Pole2/Gtpbp4/Rad17/Polk/Senp2/Donson/Esco1/Smc3/Stag2/Terf1/Ing5/Ilkap/Mcm10/Orc4/Ttf1/Cdan1/Rad51/Mcm8/Mgme1/Nasp/Rpa2/Cdc7/Recql/Blm/Pold3/Rbbp6/Rrm1/Gins4/Orc6/Mre11a/Usp37/Rfwd3/Polq/Ddx11/Pold1/Rtel1/Kat7/Ciz1/2810417H13Rik/Zbtb38/Wapal/Sin3a/Zfp830/Chtf8/Lig4/Nfic/Ankrd17/Upf1/Trp53/Mapk15	58
GO	CC	GO:0005874	microtubule	85/2279	394/17165	3.02027e-06	0.000164333	ENSMUSG00000004364/ENSMUSG00000005125/ENSMUSG00000008035/ENSMUSG00000013155/ENSMUSG00000015149/ENSMUSG00000015222/ENSMUSG00000017421/ENSMUSG00000018707/ENSMUSG00000019487/ENSMUSG00000019845/ENSMUSG00000020181/ENSMUSG00000020212/ENSMUSG00000020492/ENSMUSG00000021693/ENSMUSG00000022114/ENSMUSG00000022234/ENSMUSG00000022420/ENSMUSG00000022770/ENSMUSG00000022973/ENSMUSG00000023004/ENSMUSG00000024120/…	Cul3/Ndrg1/Mid1ip1/Enkd1/Sirt2/Map2/Zfp207/Dync1h1/Trip10/Tube1/Nav3/Mdm1/Ska2/Kif2a/Spry2/Cct5/Dnal4/Dlg1/Synj1/Tuba1b/Lrpprc/Svil/Dync2li1/Mapre2/Kifc5b/Bin1/Incenp/Kif20b/Arl3/Katnal2/Ccdc181/Dnm1/Ttll11/Camsap1/Kif18a/Knstrn/Kif3b/Aurka/Rmdn1/1700003M02Rik/Hook1/Macf1/Kcnab2/Mapre3/Gabarapl1/Ttll3/Stim1/Kifc3/Gtl3/Cep57/Nicn1/Rpgrip1l/Neil2/Fam179b/Kif15/Hook3/Pde4dip/Fam154b/Tmem214/Akna/Cdk…	85
GO	CC	GO:0001917	photoreceptor inner segment	21/2279	55/17165	3.17332e-06	0.000164333	ENSMUSG00000006007/ENSMUSG00000021123/ENSMUSG00000023979/ENSMUSG00000023982/ENSMUSG00000024654/ENSMUSG00000025900/ENSMUSG00000026609/ENSMUSG00000026825/ENSMUSG00000029064/ENSMUSG00000029663/ENSMUSG00000030324/ENSMUSG00000034601/ENSMUSG00000034837/ENSMUSG00000035504/ENSMUSG00000037446/ENSMUSG00000038241/ENSMUSG00000039137/ENSMUSG00000040860/ENSMUSG00000046753/ENSMUSG00000059482/ENSMUSG00000063681	Pdc/Rdh12/Guca1b/Guca1a/Asrgl1/Rp1/Ush2a/Dnm1/Gnb1/Gngt1/Rho/2700049A03Rik/Gnat1/Reep6/Tulp1/Cep250/Whrn/Crocc/Ccdc66/2610301B20Rik/Crb1	21
GO	CC	GO:0016607	nuclear speck	82/2279	378/17165	3.58785e-06	0.000165153	ENSMUSG00000001017/ENSMUSG00000001767/ENSMUSG00000002996/ENSMUSG00000003752/ENSMUSG00000005583/ENSMUSG00000005609/ENSMUSG00000006289/ENSMUSG00000008373/ENSMUSG00000008958/ENSMUSG00000015748/ENSMUSG00000016664/ENSMUSG00000018379/ENSMUSG00000018974/ENSMUSG00000020659/ENSMUSG00000020705/ENSMUSG00000020850/ENSMUSG00000020929/ENSMUSG00000021012/ENSMUSG00000021134/ENSMUSG00000021890/ENSMUSG00000021902/…	Chtop/Crnkl1/Hbp1/Itpkc/Mef2c/Ctr9/Osgep/Prpf31/Vps72/Prpf3/Pacsin2/Srsf1/Sart3/Cbll1/Ddx42/Prpf8/Eftud2/Zc3h14/Srsf5/Eaf1/Phf7/Pspc1/Wbp4/Mettl3/Acin1/Tab1/Son/Srsf7/Rbm27/Trip12/Cwc22/Api5/Pias3/Pum1/Toe1/Srrm1/Sfpq/Srsf4/Kmt2e/Ccnl2/Tfip11/Dusp11/Unc45a/Rbbp6/Rbm10/Kat6a/Dnaaf1/Pias1/Usp36/Smc4/Ythdc1/Gadd45a/Topors/Aagab/Thoc2/Haus6/Hnrnpu/1110037F02Rik/Cdk13/Poldip3/Cd2bp2/Alkbh5/Hexim2/Ascc…	82
GO	CC	GO:0097014	ciliary plasm	35/2279	120/17165	3.64475e-06	0.000165153	ENSMUSG00000003354/ENSMUSG00000006464/ENSMUSG00000020930/ENSMUSG00000021918/ENSMUSG00000022911/ENSMUSG00000024253/ENSMUSG00000025035/ENSMUSG00000025900/ENSMUSG00000026605/ENSMUSG00000027329/ENSMUSG00000028294/ENSMUSG00000028730/ENSMUSG00000030276/ENSMUSG00000031831/ENSMUSG00000032221/ENSMUSG00000032601/ENSMUSG00000033282/ENSMUSG00000034292/ENSMUSG00000035126/ENSMUSG00000037325/ENSMUSG00000038564/…	Ccdc65/Bbs1/Ccdc103/Nek4/Arl13b/Dync2li1/Arl3/Rp1/Cenpf/Spef1/1700003M02Rik/Wdr65/Ttll3/Dnaaf1/Mns1/Prkar2a/Rpgrip1l/Traf3ip1/Wdr78/Bbs7/Ift172/Fam154b/Ccdc151/Gas8/Dnal1/Wdr63/Rp1l1/Dync2h1/Lrrc48/Dnah9/Rpgrip1/Bbs5/Wdr90/Ttc30a1/Ttc30b	35
GO	BP	GO:0042073	intraciliary transport	18/2267	40/17047	9.6794e-07	0.000172481	ENSMUSG00000006464/ENSMUSG00000007867/ENSMUSG00000009828/ENSMUSG00000024253/ENSMUSG00000025035/ENSMUSG00000027778/ENSMUSG00000028576/ENSMUSG00000029469/ENSMUSG00000030323/ENSMUSG00000031028/ENSMUSG00000032514/ENSMUSG00000034292/ENSMUSG00000034848/ENSMUSG00000037890/ENSMUSG00000038564/ENSMUSG00000047193/ENSMUSG00000075271/ENSMUSG00000075273	Bbs1/Ift43/Ick/Dync2li1/Arl3/Ift80/Ift74/Ift81/Ift122/Tub/Ttc21a/Traf3ip1/Ttc21b/Wdr19/Ift172/Dync2h1/Ttc30a1/Ttc30b	18
GO	CC	GO:0005819	spindle	74/2279	333/17165	4.27368e-06	0.00018226	ENSMUSG00000002058/ENSMUSG00000004221/ENSMUSG00000004364/ENSMUSG00000015149/ENSMUSG00000016319/ENSMUSG00000017421/ENSMUSG00000018372/ENSMUSG00000018501/ENSMUSG00000018651/ENSMUSG00000019952/ENSMUSG00000020492/ENSMUSG00000020739/ENSMUSG00000021693/ENSMUSG00000022391/ENSMUSG00000022556/ENSMUSG00000023072/ENSMUSG00000023345/ENSMUSG00000024073/ENSMUSG00000024277/ENSMUSG00000024301/ENSMUSG00000024660/…	Unc119/Ikbkg/Cul3/Sirt2/Slc25a5/Zfp207/Cep95/Ncor1/Tada2a/Poc1b/Ska2/Nup85/Kif2a/Rangap1/Hsf1/Cep89/Poc1a/Birc6/Mapre2/Kifc5b/Incenp/Kif20b/Smc3/Arl3/Katnal2/Stag2/Terf1/Cenpf/Kif18a/Knstrn/Fam110a/Kif3b/Aurka/Ect2/Gpsm2/Rmdn1/Mapre3/Cdc7/Mad2l1/Kbtbd8/Brcc3/Cep63/Cep350/Mad2l1bp/Neil2/Ddx11/Aaas/Kif15/Topors/Cep85/Cep44/Cep250/Dido1/Cdk5rap2/Cep104/Hnrnpu/Lats1/Katnal1/Mapk1ip1/Haus1/Wdr60/Spice…	74
GO	BP	GO:0061512	protein localization to cilium	21/2267	52/17047	1.10763e-06	0.000191205	ENSMUSG00000006464/ENSMUSG00000020895/ENSMUSG00000022911/ENSMUSG00000025035/ENSMUSG00000025245/ENSMUSG00000030323/ENSMUSG00000031028/ENSMUSG00000031755/ENSMUSG00000032514/ENSMUSG00000034848/ENSMUSG00000035919/ENSMUSG00000037446/ENSMUSG00000037890/ENSMUSG00000038122/ENSMUSG00000038593/ENSMUSG00000039765/ENSMUSG00000040220/ENSMUSG00000040860/ENSMUSG00000046753/ENSMUSG00000047193/ENSMUSG00000063704	Bbs1/Tmem107/Arl13b/Arl3/Lztfl1/Ift122/Tub/Bbs2/Ttc21a/Ttc21b/Bbs9/Tulp1/Wdr19/Tbc1d32/Tctn1/Cc2d2a/Gas8/Crocc/Ccdc66/Dync2h1/Mapk15	21
GO	BP	GO:0009416	response to light stimulus	67/2267	284/17047	1.46106e-06	0.000242059	ENSMUSG00000002413/ENSMUSG00000002948/ENSMUSG00000003068/ENSMUSG00000004655/ENSMUSG00000005089/ENSMUSG00000005705/ENSMUSG00000014426/ENSMUSG00000018199/ENSMUSG00000020038/ENSMUSG00000020063/ENSMUSG00000020366/ENSMUSG00000020413/ENSMUSG00000020907/ENSMUSG00000021668/ENSMUSG00000021670/ENSMUSG00000021684/ENSMUSG00000021694/ENSMUSG00000021983/ENSMUSG00000022124/ENSMUSG00000022160/ENSMUSG00000023979/…	Braf/Map2k7/Stk11/Aqp1/Slc1a2/Agrp/Map3k4/Trove2/Cry1/Sirt1/Mapk9/Hus1/Rcvrn/Polk/Hmgcr/Pde8b/Ercc8/Atp8a2/Fbxl3/Mettl3/Guca1b/Guca1a/Msh2/Map4k3/Ercc3/Ddb1/Cabp4/Rp1/Pde6d/1700007K13Rik/Trp53inp1/B4galt2/Ube4b/Mtor/Gnb1/Pde6b/Gngt1/Kras/Rho/Cacna1f/Rs1/Mecp2/Grk1/Cngb1/Pias1/Ccar2/Gnat1/Reep6/Tulp1/Cep250/Sct/Pold1/2810417H13Rik/Atp1a3/Pik3r1/Cacna2d4/Papd4/Gucy2f/Cirbp/Ccdc66/Dcun1d3/Ep300/Rgs9…	67
GO	BP	GO:0018023	peptidyl-lysine trimethylation	18/2267	41/17047	1.51149e-06	0.000242059	ENSMUSG00000005609/ENSMUSG00000006307/ENSMUSG00000020063/ENSMUSG00000024384/ENSMUSG00000028397/ENSMUSG00000029004/ENSMUSG00000031393/ENSMUSG00000034832/ENSMUSG00000036181/ENSMUSG00000039065/ENSMUSG00000039219/ENSMUSG00000039231/ENSMUSG00000040943/ENSMUSG00000044791/ENSMUSG00000045098/ENSMUSG00000051627/ENSMUSG00000059851/ENSMUSG00000061559	Ctr9/Kmt2b/Sirt1/Iws1/Kdm4c/Kmt2e/Mecp2/Tet3/Hist1h1c/Fam173b/Arid4b/Suv39h1/Tet2/Setd2/Suv420h1/Hist1h1e/Suv420h2/Wdr61	18
GO	BP	GO:0034968	histone lysine methylation	34/2267	111/17047	1.53368e-06	0.000242059	ENSMUSG00000002052/ENSMUSG00000005609/ENSMUSG00000006307/ENSMUSG00000006920/ENSMUSG00000015697/ENSMUSG00000017146/ENSMUSG00000017548/ENSMUSG00000020063/ENSMUSG00000024067/ENSMUSG00000024193/ENSMUSG00000024384/ENSMUSG00000026439/ENSMUSG00000026646/ENSMUSG00000028397/ENSMUSG00000029004/ENSMUSG00000031393/ENSMUSG00000034379/ENSMUSG00000034832/ENSMUSG00000036181/ENSMUSG00000036893/ENSMUSG00000038056/…	Supt6/Ctr9/Kmt2b/Ezh1/Setdb1/Brca1/Suz12/Sirt1/Dpy30/Phf1/Iws1/Rbbp5/Suv39h2/Kdm4c/Kmt2e/Mecp2/Wdr5b/Tet3/Hist1h1c/Ehmt1/Kmt2c/Jarid2/Arid4b/Suv39h1/Tet2/Setd2/Suv420h1/Kmt2d/Rlf/Hist1h1e/Prdm9/Kdm3a/Suv420h2/Wdr61	34
GO	BP	GO:0043631	RNA polyadenylation	19/2267	45/17047	1.60199e-06	0.000245816	ENSMUSG00000003435/ENSMUSG00000005609/ENSMUSG00000011960/ENSMUSG00000021012/ENSMUSG00000022556/ENSMUSG00000023118/ENSMUSG00000026361/ENSMUSG00000027079/ENSMUSG00000027893/ENSMUSG00000030816/ENSMUSG00000034820/ENSMUSG00000036779/ENSMUSG00000040720/ENSMUSG00000041328/ENSMUSG00000042167/ENSMUSG00000042487/ENSMUSG00000046201/ENSMUSG00000053536/ENSMUSG00000075600	Supt5/Ctr9/Ccnt1/Zc3h14/Hsf1/Sympk/Cdc73/Clp1/Ahcyl1/Rnf40/Cpsf7/Papd5/1110037F02Rik/Pcf11/Papd4/Leo1/Scaf8/Cstf2t/Zc3h3	19
GO	BP	GO:0051028	mRNA transport	33/2267	107/17047	1.83556e-06	0.000274044	ENSMUSG00000001017/ENSMUSG00000002052/ENSMUSG00000003226/ENSMUSG00000007670/ENSMUSG00000015023/ENSMUSG00000018379/ENSMUSG00000020739/ENSMUSG00000022142/ENSMUSG00000022556/ENSMUSG00000022855/ENSMUSG00000024097/ENSMUSG00000024120/ENSMUSG00000024384/ENSMUSG00000029814/ENSMUSG00000031347/ENSMUSG00000034274/ENSMUSG00000035851/ENSMUSG00000036678/ENSMUSG00000037475/ENSMUSG00000037933/ENSMUSG00000039509/…	Chtop/Supt6/Ranbp2/Khsrp/Ddx19a/Srsf1/Nup85/Nup155/Hsf1/Senp2/Srsf7/Lrpprc/Iws1/Igf2bp3/Cetn2/Thoc5/Ythdc1/Aaas/Thoc2/Bicd2/Nup133/Nup88/Poldip3/Alkbh5/Setd2/Hnrnpa1/Nup160/Nup188/Nup107/Pom121/Rbm15b/Zc3h3/Casc3	33
GO	CC	GO:0005930	axoneme	34/2279	119/17165	8.19467e-06	0.000330063	ENSMUSG00000003354/ENSMUSG00000006464/ENSMUSG00000020930/ENSMUSG00000022911/ENSMUSG00000024253/ENSMUSG00000025035/ENSMUSG00000025900/ENSMUSG00000026605/ENSMUSG00000027329/ENSMUSG00000028294/ENSMUSG00000028730/ENSMUSG00000030276/ENSMUSG00000031831/ENSMUSG00000032221/ENSMUSG00000032601/ENSMUSG00000033282/ENSMUSG00000034292/ENSMUSG00000035126/ENSMUSG00000037325/ENSMUSG00000038564/ENSMUSG00000038570/…	Ccdc65/Bbs1/Ccdc103/Arl13b/Dync2li1/Arl3/Rp1/Cenpf/Spef1/1700003M02Rik/Wdr65/Ttll3/Dnaaf1/Mns1/Prkar2a/Rpgrip1l/Traf3ip1/Wdr78/Bbs7/Ift172/Fam154b/Ccdc151/Gas8/Dnal1/Wdr63/Rp1l1/Dync2h1/Lrrc48/Dnah9/Rpgrip1/Bbs5/Wdr90/Ttc30a1/Ttc30b	34
GO	BP	GO:0006378	mRNA polyadenylation	18/2267	42/17047	2.31725e-06	0.000336855	ENSMUSG00000003435/ENSMUSG00000005609/ENSMUSG00000011960/ENSMUSG00000021012/ENSMUSG00000022556/ENSMUSG00000023118/ENSMUSG00000026361/ENSMUSG00000027079/ENSMUSG00000027893/ENSMUSG00000030816/ENSMUSG00000034820/ENSMUSG00000036779/ENSMUSG00000040720/ENSMUSG00000041328/ENSMUSG00000042487/ENSMUSG00000046201/ENSMUSG00000053536/ENSMUSG00000075600	Supt5/Ctr9/Ccnt1/Zc3h14/Hsf1/Sympk/Cdc73/Clp1/Ahcyl1/Rnf40/Cpsf7/Papd5/1110037F02Rik/Pcf11/Leo1/Scaf8/Cstf2t/Zc3h3	18
GO	BP	GO:0019439	aromatic compound catabolic process	96/2267	458/17047	2.85227e-06	0.000403999	ENSMUSG00000000628/ENSMUSG00000001415/ENSMUSG00000005682/ENSMUSG00000007670/ENSMUSG00000010554/ENSMUSG00000011752/ENSMUSG00000014907/ENSMUSG00000016018/ENSMUSG00000017264/ENSMUSG00000018501/ENSMUSG00000020079/ENSMUSG00000020108/ENSMUSG00000020346/ENSMUSG00000020362/ENSMUSG00000020495/ENSMUSG00000020576/ENSMUSG00000020594/ENSMUSG00000020719/ENSMUSG00000021012/ENSMUSG00000021196/ENSMUSG00000021255/…	Hk2/Smg5/Pan2/Khsrp/Mettl16/Pgam1/Naf1/Skiv2l2/Exosc10/Ncor1/Supv3l1/Ddit4/Mgat1/Cnot6/Smg8/Nbas/Pum2/Ddx5/Zc3h14/Pfkp/Esrrb/Pde8b/Rnaseh2b/Dcp1a/Ppara/Hsf1/Pcbp4/Lrpprc/Dnase1l2/Pde8a/Angel2/Myef2/Adal/Mtch2/Hdc/Exosc8/Nudt17/Mettl14/Pum1/Ybx1/Ago3/Mtor/Ppargc1a/Pan3/Aldoa/Rbm10/Acat1/Pkm/Xrn1/Nt5e/Mlh1/Dis3/Eri3/Dak/Cnot6l/Tet3/Secisbp2/Cnot1/Upf3b/Ago2/Papd5/Tob1/9630033F20Rik/Foxk2/Exosc2/Hnr…	96
GO	BP	GO:0043414	macromolecule methylation	66/2267	284/17047	3.02386e-06	0.000413681	ENSMUSG00000001017/ENSMUSG00000002052/ENSMUSG00000004127/ENSMUSG00000005609/ENSMUSG00000006307/ENSMUSG00000006920/ENSMUSG00000010554/ENSMUSG00000015697/ENSMUSG00000017146/ENSMUSG00000017548/ENSMUSG00000019795/ENSMUSG00000020063/ENSMUSG00000020659/ENSMUSG00000020661/ENSMUSG00000021311/ENSMUSG00000022160/ENSMUSG00000024067/ENSMUSG00000024193/ENSMUSG00000024251/ENSMUSG00000024384/ENSMUSG00000026439/…	Chtop/Supt6/Trmt10a/Ctr9/Kmt2b/Ezh1/Mettl16/Setdb1/Brca1/Suz12/Pcmt1/Sirt1/Cbll1/Dnmt3a/Mtr/Mettl3/Dpy30/Phf1/Thada/Iws1/Rbbp5/Suv39h2/Mettl13/Trdmt1/Bmi1/Pcmtd2/Pik3ca/Mettl14/Kdm4c/Kmt2e/Mthfr/Trmt44/Atf7ip/Mecp2/Hemk1/Wdr5b/Tet3/Hist1h1c/Ehmt1/Trmt12/Kmt2c/Jarid2/Fam173b/Arid4b/Suv39h1/Icmt/Pcif1/1110037F02Rik/Tet2/Tdrkh/Trmt10c/Setd2/Suv420h1/Rbm15/Kmt2d/Rlf/Hist1h1e/Prdm9/Kdm3a/Suv420h2/Wtap…	66
GO	BP	GO:0050684	regulation of mRNA processing	38/2267	134/17047	3.13134e-06	0.000413681	ENSMUSG00000002052/ENSMUSG00000003435/ENSMUSG00000005609/ENSMUSG00000010554/ENSMUSG00000011960/ENSMUSG00000015165/ENSMUSG00000018379/ENSMUSG00000018974/ENSMUSG00000020719/ENSMUSG00000021012/ENSMUSG00000021134/ENSMUSG00000022139/ENSMUSG00000022185/ENSMUSG00000022556/ENSMUSG00000022961/ENSMUSG00000024097/ENSMUSG00000024384/ENSMUSG00000026361/ENSMUSG00000027893/ENSMUSG00000028911/ENSMUSG00000029439/…	Supt6/Supt5/Ctr9/Mettl16/Ccnt1/Hnrnpl/Srsf1/Sart3/Ddx5/Zc3h14/Srsf5/Mbnl2/Acin1/Hsf1/Son/Srsf7/Iws1/Cdc73/Ahcyl1/Srsf4/Sfswap/Rnf40/Rbm10/Rbmx/Cpsf7/Ythdc1/Hnrnpu/1110037F02Rik/Rbm7/Leo1/Safb2/Cirbp/Hnrnpa1/Rbm15/Ddx17/Wtap/Rbm15b/Zc3h3	38
GO	BP	GO:0016569	covalent chromatin modification	96/2267	459/17047	3.1453e-06	0.000413681	ENSMUSG00000001017/ENSMUSG00000002052/ENSMUSG00000002748/ENSMUSG00000003778/ENSMUSG00000004698/ENSMUSG00000005609/ENSMUSG00000006307/ENSMUSG00000006920/ENSMUSG00000015149/ENSMUSG00000015697/ENSMUSG00000017146/ENSMUSG00000017210/ENSMUSG00000017548/ENSMUSG00000018651/ENSMUSG00000018974/ENSMUSG00000020063/ENSMUSG00000020519/ENSMUSG00000020538/ENSMUSG00000020647/ENSMUSG00000020661/ENSMUSG00000021028/…	Chtop/Supt6/Baz1b/Brd8/Hdac9/Ctr9/Kmt2b/Ezh1/Sirt2/Setdb1/Brca1/Med24/Suz12/Tada2a/Sart3/Sirt1/Sap30l/Srebf1/Ncoa1/Dnmt3a/Mbip/Dpf3/Nipbl/Kansl2/Map3k12/Chd1/Ubr2/Akap8/Dpy30/Phf1/Iws1/Ddb1/Naa40/Taf5/Usp16/Kansl1l/Trip12/Ing5/Cdc73/Elk4/Rbbp5/Suv39h2/Bmi1/Aurka/Kdm4c/Sfpq/Eya3/Kmt2e/Mthfr/Clock/Atf7ip/Rnf40/Brcc3/Mecp2/Kat6a/Usp3/Usp36/Wdr5b/Tet3/Gtf3c4/Hist1h1c/Ehmt1/Mcrs1/Phf2/Kmt2c/Jarid2/Kat…	96
GO	CC	GO:0031514	motile cilium	45/2279	178/17165	1.12826e-05	0.000417197	ENSMUSG00000003354/ENSMUSG00000004364/ENSMUSG00000006464/ENSMUSG00000020486/ENSMUSG00000020664/ENSMUSG00000020878/ENSMUSG00000020930/ENSMUSG00000021270/ENSMUSG00000021693/ENSMUSG00000022621/ENSMUSG00000022677/ENSMUSG00000022911/ENSMUSG00000023072/ENSMUSG00000024253/ENSMUSG00000026578/ENSMUSG00000026679/ENSMUSG00000027274/ENSMUSG00000027329/ENSMUSG00000028294/ENSMUSG00000029442/ENSMUSG00000029469/…	Ccdc65/Cul3/Bbs1/Sept4/Dld/Lrrc46/Ccdc103/Hsp90aa1/Kif2a/Rabl2/Fopnl/Arl13b/Cep89/Dync2li1/Ccdc181/Enkur/Mkks/Spef1/1700003M02Rik/Wdr66/Ift81/Iqcd/Stard10/Aldoa/Bbs2/Gtl3/Ddx6/Mns1/Iqcg/Nme5/Wdr19/Ift172/Fam154b/Ift88/Gas8/A330021E22Rik/Dync2h1/Eno4/Lrrc48/Dnah9/Tsga10/Intu/Tcp11/Ldha/Spef2	45
GO	CC	GO:0016605	PML body	29/2279	96/17165	1.15089e-05	0.000417197	ENSMUSG00000002814/ENSMUSG00000004934/ENSMUSG00000010362/ENSMUSG00000014668/ENSMUSG00000020063/ENSMUSG00000021945/ENSMUSG00000021972/ENSMUSG00000022556/ENSMUSG00000022855/ENSMUSG00000027109/ENSMUSG00000027177/ENSMUSG00000027323/ENSMUSG00000028211/ENSMUSG00000028884/ENSMUSG00000028991/ENSMUSG00000029167/ENSMUSG00000030528/ENSMUSG00000031540/ENSMUSG00000031928/ENSMUSG00000032405/ENSMUSG00000033596/…	Top3a/Pias4/Rdm1/Chfr/Sirt1/Zmym2/Hmbox1/Hsf1/Senp2/Sp3/Hipk3/Rad51/Trp53inp1/Rpa2/Mtor/Ppargc1a/Blm/Kat6a/Mre11a/Pias1/Rfwd3/Topors/Thap1/Trp53inp2/Morc3/Ubn1/Arntl/Max/Trp53	29
GO	BP	GO:0000077	DNA damage checkpoint	31/2267	100/17047	3.30711e-06	0.000424848	ENSMUSG00000017146/ENSMUSG00000020038/ENSMUSG00000020381/ENSMUSG00000020413/ENSMUSG00000021635/ENSMUSG00000021932/ENSMUSG00000022248/ENSMUSG00000022960/ENSMUSG00000024151/ENSMUSG00000025646/ENSMUSG00000027242/ENSMUSG00000028884/ENSMUSG00000029238/ENSMUSG00000029863/ENSMUSG00000030528/ENSMUSG00000031201/ENSMUSG00000031446/ENSMUSG00000031928/ENSMUSG00000032534/ENSMUSG00000033596/ENSMUSG00000033712/…	Brca1/Cry1/3010026O09Rik/Hus1/Rad17/Rnaseh2b/Rad1/Donson/Msh2/Atrip/Wdr76/Rpa2/Clock/Casp2/Blm/Brcc3/Cul4a/Mre11a/Cep63/Rfwd3/Ccar2/Thoc5/Fam175a/Rad9b/Gltscr2/Trp53bp1/Zfp830/Gigyf2/Trp53/Taok2/Taok3	31
GO	BP	GO:0031570	DNA integrity checkpoint	33/2267	110/17047	3.61212e-06	0.000445472	ENSMUSG00000017146/ENSMUSG00000017485/ENSMUSG00000020038/ENSMUSG00000020381/ENSMUSG00000020413/ENSMUSG00000021635/ENSMUSG00000021932/ENSMUSG00000022248/ENSMUSG00000022960/ENSMUSG00000024151/ENSMUSG00000025646/ENSMUSG00000027242/ENSMUSG00000028884/ENSMUSG00000029238/ENSMUSG00000029863/ENSMUSG00000030528/ENSMUSG00000031201/ENSMUSG00000031446/ENSMUSG00000031878/ENSMUSG00000031928/ENSMUSG00000032534/…	Brca1/Top2b/Cry1/3010026O09Rik/Hus1/Rad17/Rnaseh2b/Rad1/Donson/Msh2/Atrip/Wdr76/Rpa2/Clock/Casp2/Blm/Brcc3/Cul4a/Nae1/Mre11a/Cep63/Rfwd3/Ccar2/Thoc5/Fam175a/Rad9b/Gltscr2/Trp53bp1/Zfp830/Gigyf2/Trp53/Taok2/Taok3	33
GO	BP	GO:0051236	establishment of RNA localization	41/2267	150/17047	3.62893e-06	0.000445472	ENSMUSG00000001017/ENSMUSG00000002052/ENSMUSG00000003226/ENSMUSG00000007670/ENSMUSG00000008301/ENSMUSG00000015023/ENSMUSG00000018379/ENSMUSG00000020739/ENSMUSG00000022119/ENSMUSG00000022142/ENSMUSG00000022556/ENSMUSG00000022855/ENSMUSG00000024097/ENSMUSG00000024120/ENSMUSG00000024384/ENSMUSG00000024491/ENSMUSG00000025925/ENSMUSG00000026812/ENSMUSG00000028820/ENSMUSG00000029814/ENSMUSG00000031347/…	Chtop/Supt6/Ranbp2/Khsrp/Phax/Ddx19a/Srsf1/Nup85/Rbm26/Nup155/Hsf1/Senp2/Srsf7/Lrpprc/Iws1/Rbm27/Terf1/Tsc1/Sfpq/Igf2bp3/Cetn2/Thoc5/Ythdc1/Aaas/Thoc2/Bicd2/Nup133/Hnrnpu/Nup88/Poldip3/Alkbh5/Setd2/Hnrnpa1/Nup160/Nup188/Nup107/Pom121/Mrpl18/Rbm15b/Zc3h3/Casc3	41
GO	BP	GO:0006403	RNA localization	45/2267	171/17047	3.79383e-06	0.00045559	ENSMUSG00000000552/ENSMUSG00000001017/ENSMUSG00000002052/ENSMUSG00000003226/ENSMUSG00000007670/ENSMUSG00000008301/ENSMUSG00000015023/ENSMUSG00000017264/ENSMUSG00000018379/ENSMUSG00000020739/ENSMUSG00000022119/ENSMUSG00000022142/ENSMUSG00000022556/ENSMUSG00000022855/ENSMUSG00000024097/ENSMUSG00000024120/ENSMUSG00000024384/ENSMUSG00000024491/ENSMUSG00000025925/ENSMUSG00000026812/ENSMUSG00000028820/…	Zfp385a/Chtop/Supt6/Ranbp2/Khsrp/Phax/Ddx19a/Exosc10/Srsf1/Nup85/Rbm26/Nup155/Hsf1/Senp2/Srsf7/Lrpprc/Iws1/Rbm27/Terf1/Tsc1/Sfpq/Igf2bp3/Cetn2/Thoc5/Ythdc1/Aaas/Thoc2/Bicd2/Exosc2/Nup133/Hnrnpu/Nup88/Wrap53/Poldip3/Alkbh5/Setd2/Hnrnpa1/Nup160/Nup188/Nup107/Pom121/Mrpl18/Rbm15b/Zc3h3/Casc3	45
GO	BP	GO:0016570	histone modification	93/2267	444/17047	4.18787e-06	0.000492209	ENSMUSG00000001017/ENSMUSG00000002052/ENSMUSG00000002748/ENSMUSG00000003778/ENSMUSG00000004698/ENSMUSG00000005609/ENSMUSG00000006307/ENSMUSG00000006920/ENSMUSG00000015149/ENSMUSG00000015697/ENSMUSG00000017146/ENSMUSG00000017210/ENSMUSG00000017548/ENSMUSG00000018651/ENSMUSG00000018974/ENSMUSG00000020063/ENSMUSG00000020519/ENSMUSG00000020538/ENSMUSG00000020647/ENSMUSG00000021028/ENSMUSG00000021221/…	Chtop/Supt6/Baz1b/Brd8/Hdac9/Ctr9/Kmt2b/Ezh1/Sirt2/Setdb1/Brca1/Med24/Suz12/Tada2a/Sart3/Sirt1/Sap30l/Srebf1/Ncoa1/Mbip/Dpf3/Nipbl/Kansl2/Map3k12/Ubr2/Akap8/Dpy30/Phf1/Iws1/Ddb1/Naa40/Taf5/Usp16/Kansl1l/Trip12/Ing5/Cdc73/Elk4/Rbbp5/Suv39h2/Bmi1/Aurka/Kdm4c/Sfpq/Eya3/Kmt2e/Mthfr/Clock/Rnf40/Brcc3/Mecp2/Kat6a/Usp3/Usp36/Wdr5b/Tet3/Gtf3c4/Hist1h1c/Ehmt1/Mcrs1/Phf2/Kmt2c/Jarid2/Kat7/Arid4b/Suv39h1/Ph…	93
GO	CC	GO:0032391	photoreceptor connecting cilium	16/2279	39/17165	1.61875e-05	0.00055575	ENSMUSG00000019971/ENSMUSG00000021013/ENSMUSG00000025035/ENSMUSG00000025900/ENSMUSG00000026609/ENSMUSG00000030323/ENSMUSG00000031347/ENSMUSG00000032258/ENSMUSG00000033282/ENSMUSG00000034837/ENSMUSG00000036430/ENSMUSG00000036822/ENSMUSG00000037890/ENSMUSG00000039137/ENSMUSG00000046049/ENSMUSG00000057132	Cep290/Ttc8/Arl3/Rp1/Ush2a/Ift122/Cetn2/Lca5/Rpgrip1l/Gnat1/Tbcc/Topors/Wdr19/Whrn/Rp1l1/Rpgrip1	16
GO	CC	GO:0000793	condensed chromosome	50/2279	208/17165	1.68641e-05	0.00055575	ENSMUSG00000002748/ENSMUSG00000005233/ENSMUSG00000010342/ENSMUSG00000017146/ENSMUSG00000017421/ENSMUSG00000020107/ENSMUSG00000020232/ENSMUSG00000020413/ENSMUSG00000020492/ENSMUSG00000020739/ENSMUSG00000021255/ENSMUSG00000022248/ENSMUSG00000022314/ENSMUSG00000022391/ENSMUSG00000022556/ENSMUSG00000024045/ENSMUSG00000024120/ENSMUSG00000024660/ENSMUSG00000024974/ENSMUSG00000025026/ENSMUSG00000025862/…	Baz1b/Spc25/Tex14/Brca1/Zfp207/Anapc16/Hmg20b/Hus1/Ska2/Nup85/Esrrb/Rad1/Rad21/Rangap1/Hsf1/Akap8/Lrpprc/Incenp/Smc3/Add3/Stag2/Cenpf/Rad51/Knstrn/Aurka/Ago3/Cenpa/Mad2l1/Blm/Dctn6/Cenpn/Mre11a/Mlh1/Smc4/Ncapd3/Stag3/Phf2/Rad9b/Nup133/Hnrnpu/Nsmce4a/Mis12/Wapal/Trp53bp1/Bod1/Suv420h1/Lig4/Nup107/Hmgb2/Suv420h2	50
GO	MF	GO:0004386	helicase activity	40/2282	135/17092	5.58836e-07	0.000572807	ENSMUSG00000000028/ENSMUSG00000003660/ENSMUSG00000004393/ENSMUSG00000015023/ENSMUSG00000015971/ENSMUSG00000016018/ENSMUSG00000020079/ENSMUSG00000020677/ENSMUSG00000020705/ENSMUSG00000020719/ENSMUSG00000020721/ENSMUSG00000020752/ENSMUSG00000022471/ENSMUSG00000023852/ENSMUSG00000024382/ENSMUSG00000024422/ENSMUSG00000026806/ENSMUSG00000027353/ENSMUSG00000027905/ENSMUSG00000028089/ENSMUSG00000030204/…	Cdc45/Snrnp200/Ddx56/Ddx19a/Actr8/Skiv2l2/Supv3l1/Ddx52/Ddx42/Ddx5/Helz/Recql5/Xrcc6/Chd1/Ercc3/Dhx16/Ddx31/Mcm8/Ddx20/Chd1l/Ddx47/Recql/Blm/Gins4/Mre11a/Ddx6/Dhx30/Dhx8/Helq/Ddx11/Dhx38/Rtel1/Aqr/Chd8/Ddx17/Chd9/Chd6/Upf1/Gtf2f2/Rad54b	40
GO	BP	GO:0050657	nucleic acid transport	40/2267	147/17047	5.34794e-06	0.000602898	ENSMUSG00000001017/ENSMUSG00000002052/ENSMUSG00000003226/ENSMUSG00000007670/ENSMUSG00000008301/ENSMUSG00000015023/ENSMUSG00000018379/ENSMUSG00000020739/ENSMUSG00000022119/ENSMUSG00000022142/ENSMUSG00000022556/ENSMUSG00000022855/ENSMUSG00000024097/ENSMUSG00000024120/ENSMUSG00000024384/ENSMUSG00000024491/ENSMUSG00000026812/ENSMUSG00000028820/ENSMUSG00000029814/ENSMUSG00000031347/ENSMUSG00000034274/…	Chtop/Supt6/Ranbp2/Khsrp/Phax/Ddx19a/Srsf1/Nup85/Rbm26/Nup155/Hsf1/Senp2/Srsf7/Lrpprc/Iws1/Rbm27/Tsc1/Sfpq/Igf2bp3/Cetn2/Thoc5/Ythdc1/Aaas/Thoc2/Bicd2/Nup133/Hnrnpu/Nup88/Poldip3/Alkbh5/Setd2/Hnrnpa1/Nup160/Nup188/Nup107/Pom121/Mrpl18/Rbm15b/Zc3h3/Casc3	40
GO	BP	GO:0050658	RNA transport	40/2267	147/17047	5.34794e-06	0.000602898	ENSMUSG00000001017/ENSMUSG00000002052/ENSMUSG00000003226/ENSMUSG00000007670/ENSMUSG00000008301/ENSMUSG00000015023/ENSMUSG00000018379/ENSMUSG00000020739/ENSMUSG00000022119/ENSMUSG00000022142/ENSMUSG00000022556/ENSMUSG00000022855/ENSMUSG00000024097/ENSMUSG00000024120/ENSMUSG00000024384/ENSMUSG00000024491/ENSMUSG00000026812/ENSMUSG00000028820/ENSMUSG00000029814/ENSMUSG00000031347/ENSMUSG00000034274/…	Chtop/Supt6/Ranbp2/Khsrp/Phax/Ddx19a/Srsf1/Nup85/Rbm26/Nup155/Hsf1/Senp2/Srsf7/Lrpprc/Iws1/Rbm27/Tsc1/Sfpq/Igf2bp3/Cetn2/Thoc5/Ythdc1/Aaas/Thoc2/Bicd2/Nup133/Hnrnpu/Nup88/Poldip3/Alkbh5/Setd2/Hnrnpa1/Nup160/Nup188/Nup107/Pom121/Mrpl18/Rbm15b/Zc3h3/Casc3	40
GO	BP	GO:0035721	intraciliary retrograde transport	2267-09-01	13/17047	5.52564e-06	0.000604585	ENSMUSG00000006464/ENSMUSG00000007867/ENSMUSG00000009828/ENSMUSG00000024253/ENSMUSG00000030323/ENSMUSG00000032514/ENSMUSG00000034848/ENSMUSG00000037890/ENSMUSG00000047193	Bbs1/Ift43/Ick/Dync2li1/Ift122/Ttc21a/Ttc21b/Wdr19/Dync2h1	9
GO	BP	GO:0033044	regulation of chromosome organization	74/2267	335/17047	5.67774e-06	0.000604585	ENSMUSG00000000028/ENSMUSG00000001017/ENSMUSG00000001415/ENSMUSG00000002052/ENSMUSG00000002948/ENSMUSG00000004364/ENSMUSG00000005609/ENSMUSG00000006307/ENSMUSG00000007589/ENSMUSG00000010342/ENSMUSG00000014426/ENSMUSG00000014907/ENSMUSG00000015133/ENSMUSG00000015697/ENSMUSG00000016559/ENSMUSG00000017146/ENSMUSG00000017264/ENSMUSG00000017421/ENSMUSG00000018651/ENSMUSG00000018974/ENSMUSG00000020063/…	Cdc45/Chtop/Smg5/Supt6/Map2k7/Cul3/Ctr9/Kmt2b/Tinf2/Tex14/Map3k4/Naf1/Lrrk1/Setdb1/H3f3b/Brca1/Exosc10/Zfp207/Tada2a/Sart3/Sirt1/Srebf1/Trappc12/Tlk2/Hmbox1/Nipbl/Cct5/Rad21/Akap8/Phf1/Iws1/Naa40/Tnks2/Terf1/Trip12/Nat10/Kdm4c/Sfpq/Kmt2e/Mthfr/Mapkapk5/Mad2l1/Atf7ip/Anapc15/Rnf40/Naa10/Mecp2/Mre11a/Mad2l1bp/Ddx11/Hist1h1c/Papd5/Mcrs1/Phf2/Jarid2/Rtel1/Kat7/Suv39h1/Cdk5rap2/Hnrnpu/Wapal/Sin3a/Hnrn…	74
GO	BP	GO:0018022	peptidyl-lysine methylation	35/2267	122/17047	5.69125e-06	0.000604585	ENSMUSG00000002052/ENSMUSG00000005609/ENSMUSG00000006307/ENSMUSG00000006920/ENSMUSG00000015697/ENSMUSG00000017146/ENSMUSG00000017548/ENSMUSG00000020063/ENSMUSG00000024067/ENSMUSG00000024193/ENSMUSG00000024384/ENSMUSG00000026439/ENSMUSG00000026646/ENSMUSG00000028397/ENSMUSG00000029004/ENSMUSG00000031393/ENSMUSG00000034379/ENSMUSG00000034832/ENSMUSG00000036181/ENSMUSG00000036893/ENSMUSG00000038056/…	Supt6/Ctr9/Kmt2b/Ezh1/Setdb1/Brca1/Suz12/Sirt1/Dpy30/Phf1/Iws1/Rbbp5/Suv39h2/Kdm4c/Kmt2e/Mecp2/Wdr5b/Tet3/Hist1h1c/Ehmt1/Kmt2c/Jarid2/Fam173b/Arid4b/Suv39h1/Tet2/Setd2/Suv420h1/Kmt2d/Rlf/Hist1h1e/Prdm9/Kdm3a/Suv420h2/Wdr61	35
GO	BP	GO:0006302	double-strand break repair	52/2267	212/17047	6.55655e-06	0.000683365	ENSMUSG00000000028/ENSMUSG00000007646/ENSMUSG00000010154/ENSMUSG00000015971/ENSMUSG00000017146/ENSMUSG00000017485/ENSMUSG00000020381/ENSMUSG00000020413/ENSMUSG00000020752/ENSMUSG00000022141/ENSMUSG00000022314/ENSMUSG00000022471/ENSMUSG00000022556/ENSMUSG00000024054/ENSMUSG00000024151/ENSMUSG00000026219/ENSMUSG00000027323/ENSMUSG00000027353/ENSMUSG00000028820/ENSMUSG00000028884/ENSMUSG00000028886/…	Cdc45/Rad51c/Spire2/Actr8/Brca1/Top2b/3010026O09Rik/Hus1/Recql5/Nipbl/Rad21/Xrcc6/Hsf1/Smchd1/Msh2/Trip12/Rad51/Mcm8/Sfpq/Rpa2/Eya3/Cdc7/Aplf/Recql/Rad51ap1/Blm/Brcc3/Gins4/Mre11a/Mlh1/Exd2/Rfwd3/Polq/Fam175a/Helq/Fignl1/Ddx11/Parp2/Rtel1/Wrap53/Trp53bp1/Setd2/Lig4/Swsap1/Kdm2a/Rnf169/Rad51b/Trp53/Slx1b/Marf1/Zfyve26/Rad54b	52
GO	CC	GO:0098687	chromosomal region	63/2279	284/17165	2.27177e-05	0.000716102	ENSMUSG00000002748/ENSMUSG00000005233/ENSMUSG00000006920/ENSMUSG00000007589/ENSMUSG00000010342/ENSMUSG00000016559/ENSMUSG00000016831/ENSMUSG00000017421/ENSMUSG00000020107/ENSMUSG00000020492/ENSMUSG00000020628/ENSMUSG00000020661/ENSMUSG00000020739/ENSMUSG00000021635/ENSMUSG00000021972/ENSMUSG00000022314/ENSMUSG00000022391/ENSMUSG00000022556/ENSMUSG00000024054/ENSMUSG00000024170/ENSMUSG00000024660/…	Baz1b/Spc25/Ezh1/Tinf2/Tex14/H3f3b/Tox4/Zfp207/Anapc16/Ska2/Trappc12/Dnmt3a/Nup85/Rad17/Hmbox1/Rad21/Rangap1/Hsf1/Smchd1/Telo2/Incenp/Tnks2/Smc3/Stag2/Terf1/Cenpf/Cenpl/Orc4/Kif18a/Rad51/Knstrn/Aurka/Kdm4c/Rpa2/Zbtb48/Cenpa/Tfip11/Mad2l1/Blm/Dctn6/Cenpn/Mre11a/Thoc5/Ncapd3/Stag3/Thoc2/Phf2/Pold1/Rtel1/Suv39h1/Nup133/Hnrnpu/Mis12/Wrap53/Sin3a/Trp53bp1/Bod1/Suv420h1/Nup160/Nup107/Upf1/Suv420h2/Clas…	63
GO	BP	GO:0006417	regulation of translation	70/2267	314/17047	7.23273e-06	0.000739882	ENSMUSG00000000552/ENSMUSG00000005610/ENSMUSG00000007670/ENSMUSG00000010554/ENSMUSG00000015165/ENSMUSG00000015176/ENSMUSG00000015846/ENSMUSG00000019763/ENSMUSG00000020362/ENSMUSG00000020516/ENSMUSG00000020594/ENSMUSG00000020743/ENSMUSG00000020770/ENSMUSG00000020982/ENSMUSG00000021707/ENSMUSG00000022160/ENSMUSG00000022412/ENSMUSG00000023025/ENSMUSG00000023051/ENSMUSG00000024120/ENSMUSG00000024830/…	Zfp385a/Eif4g2/Khsrp/Mettl16/Hnrnpl/Nolc1/Rxra/Rmnd1/Cnot6/Rps6kb1/Pum2/Mif4gd/Unk/Nemf/Dhfr/Mettl3/Mief1/Larp4/Tarbp2/Lrpprc/Rps6kb2/Usp16/Eif4e2/Uhmk1/Tsc1/Nat10/Cdk5rap1/Mettl14/Pum1/Ago3/Mtor/Sepsecs/Eif2b1/Mapkapk5/Igf2bp3/Kbtbd8/Cnbp/Ireb2/Xrn1/Cnot6l/Secisbp2/Cnot1/Upf3b/Ago2/Rnf139/Tob1/Rara/Mtg2/Lsm14b/Pcif1/Gcn1l1/Poldip3/Trmt10c/Cirbp/Ythdf3/Tnrc6b/Gigyf2/Foxo3/Rpusd3/Ctif/Ep300/Klhl25…	70
GO	CC	GO:0032838	plasma membrane bounded cell projection cytoplasm	50/2279	211/17165	2.53835e-05	0.000766794	ENSMUSG00000000738/ENSMUSG00000003354/ENSMUSG00000006464/ENSMUSG00000015222/ENSMUSG00000018707/ENSMUSG00000020886/ENSMUSG00000020930/ENSMUSG00000021012/ENSMUSG00000021918/ENSMUSG00000022391/ENSMUSG00000022911/ENSMUSG00000024253/ENSMUSG00000024480/ENSMUSG00000025035/ENSMUSG00000025900/ENSMUSG00000026605/ENSMUSG00000026667/ENSMUSG00000027329/ENSMUSG00000028294/ENSMUSG00000028730/ENSMUSG00000028820/…	Spg7/Ccdc65/Bbs1/Map2/Dync1h1/Dlg4/Ccdc103/Zc3h14/Nek4/Rangap1/Arl13b/Dync2li1/Ap3s1/Arl3/Rp1/Cenpf/Uhmk1/Spef1/1700003M02Rik/Wdr65/Sfpq/Gabarapl1/Ttll3/Dnaaf1/Mns1/Trak1/Prkar2a/Rpgrip1l/Traf3ip1/Wdr78/Bbs7/Ift172/Fam154b/Hnrnpu/Ccdc151/Gas8/Abhd13/Dnal1/Tmem108/Wdr63/Rp1l1/Dync2h1/Lrrc48/Dnah9/Rpgrip1/Bloc1s4/Bbs5/Wdr90/Ttc30a1/Ttc30b	50
GO	CC	GO:0002177	manchette	2279-08-01	12/17165	2.87007e-05	0.00083232	ENSMUSG00000018707/ENSMUSG00000025228/ENSMUSG00000025916/ENSMUSG00000026578/ENSMUSG00000026915/ENSMUSG00000035578/ENSMUSG00000056215/ENSMUSG00000072663	Dync1h1/Actr1a/Ppp1r42/Ccdc181/Strbp/Iqcg/Lrguk/Spef2	8
GO	BP	GO:0061013	regulation of mRNA catabolic process	32/2267	109/17047	8.33728e-06	0.000837366	ENSMUSG00000007670/ENSMUSG00000010554/ENSMUSG00000020576/ENSMUSG00000020594/ENSMUSG00000021012/ENSMUSG00000023495/ENSMUSG00000026634/ENSMUSG00000027201/ENSMUSG00000028114/ENSMUSG00000028580/ENSMUSG00000028639/ENSMUSG00000028991/ENSMUSG00000031060/ENSMUSG00000034724/ENSMUSG00000035139/ENSMUSG00000036550/ENSMUSG00000036698/ENSMUSG00000036779/ENSMUSG00000037573/ENSMUSG00000039630/ENSMUSG00000041459/…	Khsrp/Mettl16/Nbas/Pum2/Zc3h14/Pcbp4/Angel2/Myef2/Mettl14/Pum1/Ybx1/Mtor/Rbm10/Cnot6l/Secisbp2/Cnot1/Ago2/Papd5/Tob1/Hnrnpu/Tardbp/Gtpbp1/Alkbh5/Pde12/Cirbp/Ythdf3/Tnrc6b/Gigyf2/Upf1/Hnrnpm/Hnrnpr/Nanos1	32
GO	BP	GO:0031123	RNA 3'-end processing	29/2267	95/17047	9.47663e-06	0.000934802	ENSMUSG00000003435/ENSMUSG00000005609/ENSMUSG00000011960/ENSMUSG00000017264/ENSMUSG00000020079/ENSMUSG00000020549/ENSMUSG00000021012/ENSMUSG00000022556/ENSMUSG00000023118/ENSMUSG00000026361/ENSMUSG00000027079/ENSMUSG00000027176/ENSMUSG00000027752/ENSMUSG00000027893/ENSMUSG00000028016/ENSMUSG00000028688/ENSMUSG00000029547/ENSMUSG00000030816/ENSMUSG00000033423/ENSMUSG00000034820/ENSMUSG00000036779/…	Supt5/Ctr9/Ccnt1/Exosc10/Supv3l1/Elac2/Zc3h14/Hsf1/Sympk/Cdc73/Clp1/Cstf3/Exosc8/Ahcyl1/Ints12/Toe1/Ints1/Rnf40/Eri3/Cpsf7/Papd5/Exosc2/1110037F02Rik/Pcf11/Leo1/Trmt10c/Scaf8/Cstf2t/Zc3h3	29
GO	BP	GO:0006479	protein methylation	45/2267	177/17047	1.00595e-05	0.000958081	ENSMUSG00000001017/ENSMUSG00000002052/ENSMUSG00000005609/ENSMUSG00000006307/ENSMUSG00000006920/ENSMUSG00000015697/ENSMUSG00000017146/ENSMUSG00000017548/ENSMUSG00000019795/ENSMUSG00000020063/ENSMUSG00000021311/ENSMUSG00000024067/ENSMUSG00000024193/ENSMUSG00000024384/ENSMUSG00000026439/ENSMUSG00000026646/ENSMUSG00000026694/ENSMUSG00000027589/ENSMUSG00000028397/ENSMUSG00000029004/ENSMUSG00000029009/…	Chtop/Supt6/Ctr9/Kmt2b/Ezh1/Setdb1/Brca1/Suz12/Pcmt1/Sirt1/Mtr/Dpy30/Phf1/Iws1/Rbbp5/Suv39h2/Mettl13/Pcmtd2/Kdm4c/Kmt2e/Mthfr/Mecp2/Hemk1/Wdr5b/Tet3/Hist1h1c/Ehmt1/Kmt2c/Jarid2/Fam173b/Arid4b/Suv39h1/Icmt/Tet2/Setd2/Suv420h1/Kmt2d/Rlf/Hist1h1e/Prdm9/Kdm3a/Suv420h2/Wdr61/1700052N19Rik/Lcmt2	45
GO	BP	GO:0008213	protein alkylation	45/2267	177/17047	1.00595e-05	0.000958081	ENSMUSG00000001017/ENSMUSG00000002052/ENSMUSG00000005609/ENSMUSG00000006307/ENSMUSG00000006920/ENSMUSG00000015697/ENSMUSG00000017146/ENSMUSG00000017548/ENSMUSG00000019795/ENSMUSG00000020063/ENSMUSG00000021311/ENSMUSG00000024067/ENSMUSG00000024193/ENSMUSG00000024384/ENSMUSG00000026439/ENSMUSG00000026646/ENSMUSG00000026694/ENSMUSG00000027589/ENSMUSG00000028397/ENSMUSG00000029004/ENSMUSG00000029009/…	Chtop/Supt6/Ctr9/Kmt2b/Ezh1/Setdb1/Brca1/Suz12/Pcmt1/Sirt1/Mtr/Dpy30/Phf1/Iws1/Rbbp5/Suv39h2/Mettl13/Pcmtd2/Kdm4c/Kmt2e/Mthfr/Mecp2/Hemk1/Wdr5b/Tet3/Hist1h1c/Ehmt1/Kmt2c/Jarid2/Fam173b/Arid4b/Suv39h1/Icmt/Tet2/Setd2/Suv420h1/Kmt2d/Rlf/Hist1h1e/Prdm9/Kdm3a/Suv420h2/Wdr61/1700052N19Rik/Lcmt2	45
GO	BP	GO:0034248	regulation of cellular amide metabolic process	78/2267	364/17047	1.0425e-05	0.000968282	ENSMUSG00000000552/ENSMUSG00000005610/ENSMUSG00000007670/ENSMUSG00000010554/ENSMUSG00000011752/ENSMUSG00000015165/ENSMUSG00000015176/ENSMUSG00000015846/ENSMUSG00000019763/ENSMUSG00000020009/ENSMUSG00000020362/ENSMUSG00000020516/ENSMUSG00000020594/ENSMUSG00000020743/ENSMUSG00000020770/ENSMUSG00000020982/ENSMUSG00000021707/ENSMUSG00000021770/ENSMUSG00000022160/ENSMUSG00000022412/ENSMUSG00000023025/…	Zfp385a/Eif4g2/Khsrp/Mettl16/Pgam1/Hnrnpl/Nolc1/Rxra/Rmnd1/Ifngr1/Cnot6/Rps6kb1/Pum2/Mif4gd/Unk/Nemf/Dhfr/Samd8/Mettl3/Mief1/Larp4/Tarbp2/Abcg1/Lrpprc/Bin1/Rps6kb2/Usp16/Ormdl1/Eif4e2/Uhmk1/Tsc1/Nat10/Cdk5rap1/Mettl14/Pum1/Ago3/Mtor/Sepsecs/Eif2b1/Mapkapk5/Igf2bp3/Kbtbd8/Cnbp/Ireb2/Xrn1/Cnot6l/Secisbp2/Abca7/Cnot1/Upf3b/Ago2/Rnf139/Tob1/Rara/9630033F20Rik/Mtg2/Lsm14b/Pcif1/Gcn1l1/Poldip3/Trmt10c/…	78
GO	BP	GO:0042462	eye photoreceptor cell development	15/2267	34/17047	1.05172e-05	0.000968282	ENSMUSG00000019971/ENSMUSG00000021730/ENSMUSG00000024842/ENSMUSG00000025380/ENSMUSG00000025900/ENSMUSG00000029663/ENSMUSG00000032292/ENSMUSG00000034837/ENSMUSG00000037446/ENSMUSG00000038151/ENSMUSG00000040632/ENSMUSG00000046753/ENSMUSG00000057132/ENSMUSG00000063681/ENSMUSG00000063810	Cep290/Hcn1/Cabp4/Fscn2/Rp1/Gngt1/Nr2e3/Gnat1/Tulp1/Prdm1/Nrl/Ccdc66/Rpgrip1/Crb1/Alms1	15
GO	BP	GO:0030705	cytoskeleton-dependent intracellular transport	42/2267	162/17047	1.17277e-05	0.00104	ENSMUSG00000000738/ENSMUSG00000006464/ENSMUSG00000007867/ENSMUSG00000009828/ENSMUSG00000015222/ENSMUSG00000017686/ENSMUSG00000018707/ENSMUSG00000024253/ENSMUSG00000024480/ENSMUSG00000025035/ENSMUSG00000025228/ENSMUSG00000025241/ENSMUSG00000027778/ENSMUSG00000028572/ENSMUSG00000028576/ENSMUSG00000028820/ENSMUSG00000029053/ENSMUSG00000029469/ENSMUSG00000030323/ENSMUSG00000031028/ENSMUSG00000031393/…	Spg7/Bbs1/Ift43/Ick/Map2/Rhot1/Dync1h1/Dync2li1/Ap3s1/Arl3/Actr1a/Fyco1/Ift80/Hook1/Ift74/Sfpq/Prkcz/Ift81/Ift122/Tub/Mecp2/Lamp1/Ttc21a/Trak1/Traf3ip1/Ttc21b/Hook3/Wdr19/Bicd2/Ift172/Mreg/Hnrnpu/Ccdc64/Myrip/Tmem108/Tmem201/Dync2h1/Bloc1s4/Syne2/Ttc30a1/Ttc30b/Kifc1	42
GO	BP	GO:0050908	detection of light stimulus involved in visual perception	2267-11-01	20/17047	1.1861e-05	0.00104	ENSMUSG00000021983/ENSMUSG00000031142/ENSMUSG00000031789/ENSMUSG00000034837/ENSMUSG00000035504/ENSMUSG00000037446/ENSMUSG00000038241/ENSMUSG00000041460/ENSMUSG00000042282/ENSMUSG00000046753/ENSMUSG00000056043	Atp8a2/Cacna1f/Cngb1/Gnat1/Reep6/Tulp1/Cep250/Cacna2d4/Gucy2f/Ccdc66/Rgs9bp	11
GO	BP	GO:0050962	detection of light stimulus involved in sensory perception	2267-11-01	20/17047	1.1861e-05	0.00104	ENSMUSG00000021983/ENSMUSG00000031142/ENSMUSG00000031789/ENSMUSG00000034837/ENSMUSG00000035504/ENSMUSG00000037446/ENSMUSG00000038241/ENSMUSG00000041460/ENSMUSG00000042282/ENSMUSG00000046753/ENSMUSG00000056043	Atp8a2/Cacna1f/Cngb1/Gnat1/Reep6/Tulp1/Cep250/Cacna2d4/Gucy2f/Ccdc66/Rgs9bp	11
GO	BP	GO:0018205	peptidyl-lysine modification	76/2267	355/17047	1.39408e-05	0.00120326	ENSMUSG00000002052/ENSMUSG00000003226/ENSMUSG00000003778/ENSMUSG00000004698/ENSMUSG00000004934/ENSMUSG00000005514/ENSMUSG00000005609/ENSMUSG00000006307/ENSMUSG00000006920/ENSMUSG00000015149/ENSMUSG00000015697/ENSMUSG00000017146/ENSMUSG00000017210/ENSMUSG00000017548/ENSMUSG00000018651/ENSMUSG00000020063/ENSMUSG00000020232/ENSMUSG00000020647/ENSMUSG00000021028/ENSMUSG00000021102/ENSMUSG00000021221/…	Supt6/Ranbp2/Brd8/Hdac9/Pias4/Por/Ctr9/Kmt2b/Ezh1/Sirt2/Setdb1/Brca1/Med24/Suz12/Tada2a/Sirt1/Hmg20b/Ncoa1/Mbip/Glrx5/Dpf3/Senp2/Kansl2/Dpy30/Phf1/Esco1/Iws1/Naa40/Taf5/Tollip/Kansl1l/Ing5/Rbbp5/Suv39h2/Bmi1/Pias3/Kdm4c/Kmt2e/Clock/Sirt4/Mecp2/Kat6a/Hmg20a/Pias1/Wdr5b/Tet3/Gtf3c4/Hist1h1c/Topors/Ehmt1/Mcrs1/Kmt2c/Jarid2/Kat7/Fam173b/Arid4b/Suv39h1/Tet2/Sin3a/Setd2/Suv420h1/Kmt2d/Rlf/Taf7/Hist1h1e…	76
GO	BP	GO:0031023	microtubule organizing center organization	35/2267	127/17047	1.49795e-05	0.00126166	ENSMUSG00000014859/ENSMUSG00000015095/ENSMUSG00000017146/ENSMUSG00000020212/ENSMUSG00000023066/ENSMUSG00000023345/ENSMUSG00000025437/ENSMUSG00000025758/ENSMUSG00000026504/ENSMUSG00000027496/ENSMUSG00000027959/ENSMUSG00000031347/ENSMUSG00000032534/ENSMUSG00000032782/ENSMUSG00000032902/ENSMUSG00000033904/ENSMUSG00000036390/ENSMUSG00000037443/ENSMUSG00000038039/ENSMUSG00000038047/ENSMUSG00000038070/…	E2f4/Fbxw5/Brca1/Mdm1/Rttn/Poc1a/Usp33/Plk4/Sdccag8/Aurka/Sass6/Cetn2/Cep63/Cntrob/Slc16a1/Ccp110/Gadd45a/Cep85/Gcc2/Haus6/Cntln/Cep250/Cdk5rap2/2810417H13Rik/Crocc/Haus1/Spice1/Pard6b/Cep120/Tmem67/Syne2/Alms1/Clasp1/Cep152/Kifc1	35
GO	BP	GO:0010389	regulation of G2/M transition of mitotic cell cycle	25/2267	78/17047	1.50742e-05	0.00126166	ENSMUSG00000007646/ENSMUSG00000017146/ENSMUSG00000020381/ENSMUSG00000020413/ENSMUSG00000021635/ENSMUSG00000021932/ENSMUSG00000022314/ENSMUSG00000022960/ENSMUSG00000024590/ENSMUSG00000026605/ENSMUSG00000029022/ENSMUSG00000029283/ENSMUSG00000030528/ENSMUSG00000031393/ENSMUSG00000031878/ENSMUSG00000031928/ENSMUSG00000041560/ENSMUSG00000042557/ENSMUSG00000046010/ENSMUSG00000052534/ENSMUSG00000053819/…	Rad51c/Brca1/3010026O09Rik/Hus1/Rad17/Rnaseh2b/Rad21/Donson/Lmnb1/Cenpf/Miip/Cdc7/Blm/Mecp2/Nae1/Mre11a/Gltscr2/Sin3a/Zfp830/Pbx1/Camk2d/Rad51b/Usp47/Taok2/Taok3	25
GO	BP	GO:0010970	transport along microtubule	39/2267	148/17047	1.58087e-05	0.00130339	ENSMUSG00000000738/ENSMUSG00000006464/ENSMUSG00000007867/ENSMUSG00000009828/ENSMUSG00000015222/ENSMUSG00000017686/ENSMUSG00000018707/ENSMUSG00000024253/ENSMUSG00000024480/ENSMUSG00000025035/ENSMUSG00000025228/ENSMUSG00000025241/ENSMUSG00000027778/ENSMUSG00000028576/ENSMUSG00000028820/ENSMUSG00000029053/ENSMUSG00000029469/ENSMUSG00000030323/ENSMUSG00000031028/ENSMUSG00000031393/ENSMUSG00000031447/…	Spg7/Bbs1/Ift43/Ick/Map2/Rhot1/Dync1h1/Dync2li1/Ap3s1/Arl3/Actr1a/Fyco1/Ift80/Ift74/Sfpq/Prkcz/Ift81/Ift122/Tub/Mecp2/Lamp1/Ttc21a/Trak1/Traf3ip1/Ttc21b/Wdr19/Bicd2/Ift172/Mreg/Hnrnpu/Ccdc64/Tmem108/Tmem201/Dync2h1/Bloc1s4/Syne2/Ttc30a1/Ttc30b/Kifc1	39
GO	BP	GO:0099111	microtubule-based transport	39/2267	149/17047	1.87046e-05	0.00151947	ENSMUSG00000000738/ENSMUSG00000006464/ENSMUSG00000007867/ENSMUSG00000009828/ENSMUSG00000015222/ENSMUSG00000017686/ENSMUSG00000018707/ENSMUSG00000024253/ENSMUSG00000024480/ENSMUSG00000025035/ENSMUSG00000025228/ENSMUSG00000025241/ENSMUSG00000027778/ENSMUSG00000028576/ENSMUSG00000028820/ENSMUSG00000029053/ENSMUSG00000029469/ENSMUSG00000030323/ENSMUSG00000031028/ENSMUSG00000031393/ENSMUSG00000031447/…	Spg7/Bbs1/Ift43/Ick/Map2/Rhot1/Dync1h1/Dync2li1/Ap3s1/Arl3/Actr1a/Fyco1/Ift80/Ift74/Sfpq/Prkcz/Ift81/Ift122/Tub/Mecp2/Lamp1/Ttc21a/Trak1/Traf3ip1/Ttc21b/Wdr19/Bicd2/Ift172/Mreg/Hnrnpu/Ccdc64/Tmem108/Tmem201/Dync2h1/Bloc1s4/Syne2/Ttc30a1/Ttc30b/Kifc1	39
GO	BP	GO:0032886	regulation of microtubule-based process	53/2267	226/17047	2.09936e-05	0.00168071	ENSMUSG00000003354/ENSMUSG00000005871/ENSMUSG00000006464/ENSMUSG00000008035/ENSMUSG00000015095/ENSMUSG00000015222/ENSMUSG00000017686/ENSMUSG00000018707/ENSMUSG00000020181/ENSMUSG00000020212/ENSMUSG00000020492/ENSMUSG00000023345/ENSMUSG00000024277/ENSMUSG00000024974/ENSMUSG00000025758/ENSMUSG00000025862/ENSMUSG00000025900/ENSMUSG00000025925/ENSMUSG00000026933/ENSMUSG00000027115/ENSMUSG00000027274/…	Ccdc65/Apc/Bbs1/Mid1ip1/Fbxw5/Map2/Rhot1/Dync1h1/Nav3/Mdm1/Ska2/Poc1a/Mapre2/Smc3/Plk4/Stag2/Rp1/Terf1/Camsap1/Kif18a/Mkks/Spef1/Gpsm2/Macf1/Mapre3/Mecp2/Lamp1/Bbs2/Gtl3/Dnaaf1/Dixdc1/Trim36/Traf3ip1/Ttc21b/Fam179b/Cep85/Bicd2/Pde4dip/Cep250/Cdk5rap2/Hnrnpu/Spice1/Cep120/Tmem67/Clip1/Map10/Mapk15/Alms1/Clasp1/Psrc1/Kifc1/Ttbk2/Hspa1a	53
GO	BP	GO:1901361	organic cyclic compound catabolic process	97/2267	486/17047	2.13357e-05	0.00168369	ENSMUSG00000000628/ENSMUSG00000001415/ENSMUSG00000005682/ENSMUSG00000007670/ENSMUSG00000010554/ENSMUSG00000011752/ENSMUSG00000014907/ENSMUSG00000016018/ENSMUSG00000017264/ENSMUSG00000018501/ENSMUSG00000020079/ENSMUSG00000020108/ENSMUSG00000020346/ENSMUSG00000020362/ENSMUSG00000020495/ENSMUSG00000020576/ENSMUSG00000020594/ENSMUSG00000020719/ENSMUSG00000021012/ENSMUSG00000021196/ENSMUSG00000021255/…	Hk2/Smg5/Pan2/Khsrp/Mettl16/Pgam1/Naf1/Skiv2l2/Exosc10/Ncor1/Supv3l1/Ddit4/Mgat1/Cnot6/Smg8/Nbas/Pum2/Ddx5/Zc3h14/Pfkp/Esrrb/Pde8b/Rnaseh2b/Dcp1a/Ppara/Hsf1/Pcbp4/Lrpprc/Dnase1l2/Pde8a/Angel2/Myef2/Adal/Mtch2/Hdc/Exosc8/Nudt17/Mettl14/Pum1/Ybx1/Ago3/Mtor/Ppargc1a/Pan3/Aldoa/Rbm10/Acat1/Pkm/Xrn1/Nt5e/Mlh1/Dis3/Eri3/Dak/Cnot6l/Tet3/Secisbp2/Cnot1/Upf3b/Ago2/Papd5/Tob1/Scarb1/9630033F20Rik/Foxk2/Exo…	97
GO	CC	GO:0042622	photoreceptor outer segment membrane	2279-08-01	13/17165	6.59005e-05	0.00183761	ENSMUSG00000021803/ENSMUSG00000025386/ENSMUSG00000029064/ENSMUSG00000029086/ENSMUSG00000030324/ENSMUSG00000067220/ENSMUSG00000071648/ENSMUSG00000075410	Cdhr1/Pde6g/Gnb1/Prom1/Rho/Cnga1/Rom1/Gm11744	8
GO	CC	GO:0034708	methyltransferase complex	31/2279	115/17165	6.90459e-05	0.00185401	ENSMUSG00000006307/ENSMUSG00000006920/ENSMUSG00000008373/ENSMUSG00000017548/ENSMUSG00000020063/ENSMUSG00000020659/ENSMUSG00000022160/ENSMUSG00000024067/ENSMUSG00000024193/ENSMUSG00000026439/ENSMUSG00000028114/ENSMUSG00000028345/ENSMUSG00000028397/ENSMUSG00000033943/ENSMUSG00000034379/ENSMUSG00000035529/ENSMUSG00000037570/ENSMUSG00000038056/ENSMUSG00000038518/ENSMUSG00000039117/ENSMUSG00000040720/…	Kmt2b/Ezh1/Prpf31/Suz12/Sirt1/Cbll1/Mettl3/Dpy30/Phf1/Rbbp5/Mettl14/Tex10/Kdm4c/Mga/Wdr5b/Prdm4/Mcrs1/Kmt2c/Jarid2/Taf4a/1110037F02Rik/Kdm5b/Rbm15/Kmt2d/Zfp646/Taf7/Chd8/Las1l/Max/Wtap/Rbm15b	31
GO	BP	GO:0051053	negative regulation of DNA metabolic process	38/2267	146/17047	2.72677e-05	0.0021215	ENSMUSG00000000530/ENSMUSG00000007589/ENSMUSG00000014850/ENSMUSG00000017264/ENSMUSG00000020413/ENSMUSG00000020752/ENSMUSG00000021149/ENSMUSG00000021635/ENSMUSG00000022556/ENSMUSG00000022960/ENSMUSG00000024054/ENSMUSG00000024151/ENSMUSG00000024811/ENSMUSG00000024974/ENSMUSG00000025862/ENSMUSG00000025925/ENSMUSG00000026219/ENSMUSG00000026803/ENSMUSG00000027185/ENSMUSG00000027284/ENSMUSG00000030528/…	Acvrl1/Tinf2/Msh3/Exosc10/Hus1/Recql5/Gtpbp4/Rad17/Hsf1/Donson/Smchd1/Msh2/Tnks2/Smc3/Stag2/Terf1/Trip12/Ttf1/Nat10/Cdan1/Blm/Mre11a/Mlh1/Polq/Hist1h1c/Papd5/Mcrs1/Rtel1/Hnrnpu/Wapal/Trp53bp1/Zfp830/Hnrnpa1/Hist1h1e/Zfp869/Rnf169/Trp53/Mapk15	38
GO	BP	GO:0001578	microtubule bundle formation	29/2267	100/17047	2.80048e-05	0.00214859	ENSMUSG00000003354/ENSMUSG00000015222/ENSMUSG00000017421/ENSMUSG00000020878/ENSMUSG00000020930/ENSMUSG00000025857/ENSMUSG00000025900/ENSMUSG00000028294/ENSMUSG00000030276/ENSMUSG00000031755/ENSMUSG00000031831/ENSMUSG00000033949/ENSMUSG00000035578/ENSMUSG00000035614/ENSMUSG00000036678/ENSMUSG00000038122/ENSMUSG00000039298/ENSMUSG00000039632/ENSMUSG00000039765/ENSMUSG00000040220/ENSMUSG00000042523/…	Ccdc65/Map2/Zfp207/Lrrc46/Ccdc103/Heatr2/Rp1/1700003M02Rik/Ttll3/Bbs2/Dnaaf1/Trim36/Iqcg/Fam179b/Aaas/Tbc1d32/Cdk5rap2/Ccdc151/Cc2d2a/Gas8/Dnal1/Wdr63/Rp1l1/Ccdc66/Clip1/Lrguk/Clasp1/Psrc1/Spef2	29
GO	MF	GO:0008017	microtubule binding	55/2282	228/17092	6.91521e-06	0.00242124	ENSMUSG00000005125/ENSMUSG00000005871/ENSMUSG00000015222/ENSMUSG00000017421/ENSMUSG00000018428/ENSMUSG00000019813/ENSMUSG00000020181/ENSMUSG00000020212/ENSMUSG00000020492/ENSMUSG00000021693/ENSMUSG00000024277/ENSMUSG00000024301/ENSMUSG00000024795/ENSMUSG00000025035/ENSMUSG00000025420/ENSMUSG00000025900/ENSMUSG00000025925/ENSMUSG00000026578/ENSMUSG00000026825/ENSMUSG00000026915/ENSMUSG00000026933/…	Ndrg1/Apc/Map2/Zfp207/Akap1/Cep57l1/Nav3/Mdm1/Ska2/Kif2a/Mapre2/Kifc5b/Kif20b/Arl3/Katnal2/Rp1/Terf1/Ccdc181/Dnm1/Strbp/Camsap1/Kif18a/Spef1/Kif3b/Sgip1/Hook1/Macf1/Tmem57/Mapre3/Wdr54/Stim1/Cetn2/Kifc3/Cep57/Cep350/Traf3ip1/Neil2/Kif15/Hook3/Fam154b/Cdk5rap2/Gas8/Katnal1/Kif21b/Ccdc66/4932418E24Rik/Clip1/Map10/Eml5/Gapdh/Eml1/Clasp1/Psrc1/Eml3/Kifc1	55
GO	MF	GO:0070063	RNA polymerase binding	21/2282	58/17092	9.23807e-06	0.00242124	ENSMUSG00000005609/ENSMUSG00000011960/ENSMUSG00000015176/ENSMUSG00000017146/ENSMUSG00000020752/ENSMUSG00000021255/ENSMUSG00000022553/ENSMUSG00000022682/ENSMUSG00000022828/ENSMUSG00000024271/ENSMUSG00000024381/ENSMUSG00000026361/ENSMUSG00000033712/ENSMUSG00000036698/ENSMUSG00000038406/ENSMUSG00000038611/ENSMUSG00000039630/ENSMUSG00000039849/ENSMUSG00000041328/ENSMUSG00000042487/ENSMUSG00000046201	Ctr9/Ccnt1/Nolc1/Brca1/Recql5/Esrrb/Maf1/Rrn3/Gtf2e1/Elp2/Bin1/Cdc73/Ccar2/Ago2/Scaf1/Phrf1/Hnrnpu/Pcif1/Pcf11/Leo1/Scaf8	21
GO	MF	GO:0015631	tubulin binding	70/2282	316/17092	1.04132e-05	0.00242124	ENSMUSG00000005125/ENSMUSG00000005871/ENSMUSG00000010136/ENSMUSG00000015222/ENSMUSG00000017421/ENSMUSG00000018428/ENSMUSG00000019813/ENSMUSG00000020181/ENSMUSG00000020212/ENSMUSG00000020492/ENSMUSG00000021693/ENSMUSG00000022234/ENSMUSG00000024120/ENSMUSG00000024277/ENSMUSG00000024301/ENSMUSG00000024795/ENSMUSG00000024974/ENSMUSG00000025035/ENSMUSG00000025420/ENSMUSG00000025900/ENSMUSG00000025916/…	Ndrg1/Apc/Pifo/Map2/Zfp207/Akap1/Cep57l1/Nav3/Mdm1/Ska2/Kif2a/Cct5/Lrpprc/Mapre2/Kifc5b/Kif20b/Smc3/Arl3/Katnal2/Rp1/Ppp1r42/Terf1/Ccdc181/Dnm1/Strbp/Camsap1/Kif18a/Spef1/Kif3b/B4galt1/Sgip1/Hook1/Ift74/Macf1/Tmem57/Mapre3/Ppargc1a/Ift81/Wdr54/Stim1/Vbp1/Cetn2/Kifc3/Cep57/Dixdc1/Cep350/Trim36/Traf3ip1/Neil2/Tbcc/Kif15/Hook3/Fam154b/Cdk5rap2/Gas8/Katnal1/Kif21b/Dnal1/Setd2/Ccdc66/4932418E24Rik/Cli…	70
GO	MF	GO:0043175	RNA polymerase core enzyme binding	17/2282	42/17092	1.18109e-05	0.00242124	ENSMUSG00000005609/ENSMUSG00000015176/ENSMUSG00000020752/ENSMUSG00000021255/ENSMUSG00000022553/ENSMUSG00000022682/ENSMUSG00000022828/ENSMUSG00000024271/ENSMUSG00000026361/ENSMUSG00000033712/ENSMUSG00000036698/ENSMUSG00000038406/ENSMUSG00000039630/ENSMUSG00000039849/ENSMUSG00000041328/ENSMUSG00000042487/ENSMUSG00000046201	Ctr9/Nolc1/Recql5/Esrrb/Maf1/Rrn3/Gtf2e1/Elp2/Cdc73/Ccar2/Ago2/Scaf1/Hnrnpu/Pcif1/Pcf11/Leo1/Scaf8	17
GO	BP	GO:0016571	histone methylation	36/2267	137/17047	3.51876e-05	0.00264079	ENSMUSG00000001017/ENSMUSG00000002052/ENSMUSG00000005609/ENSMUSG00000006307/ENSMUSG00000006920/ENSMUSG00000015697/ENSMUSG00000017146/ENSMUSG00000017548/ENSMUSG00000020063/ENSMUSG00000024067/ENSMUSG00000024193/ENSMUSG00000024384/ENSMUSG00000026439/ENSMUSG00000026646/ENSMUSG00000028397/ENSMUSG00000029004/ENSMUSG00000029009/ENSMUSG00000031393/ENSMUSG00000034379/ENSMUSG00000034832/ENSMUSG00000036181/…	Chtop/Supt6/Ctr9/Kmt2b/Ezh1/Setdb1/Brca1/Suz12/Sirt1/Dpy30/Phf1/Iws1/Rbbp5/Suv39h2/Kdm4c/Kmt2e/Mthfr/Mecp2/Wdr5b/Tet3/Hist1h1c/Ehmt1/Kmt2c/Jarid2/Arid4b/Suv39h1/Tet2/Setd2/Suv420h1/Kmt2d/Rlf/Hist1h1e/Prdm9/Kdm3a/Suv420h2/Wdr61	36
GO	BP	GO:0008156	negative regulation of DNA replication	14/2267	33/17047	3.55327e-05	0.00264079	ENSMUSG00000020413/ENSMUSG00000021149/ENSMUSG00000021635/ENSMUSG00000022960/ENSMUSG00000024974/ENSMUSG00000025862/ENSMUSG00000025925/ENSMUSG00000026803/ENSMUSG00000027284/ENSMUSG00000031928/ENSMUSG00000041408/ENSMUSG00000046010/ENSMUSG00000059552/ENSMUSG00000063704	Hus1/Gtpbp4/Rad17/Donson/Smc3/Stag2/Terf1/Ttf1/Cdan1/Mre11a/Wapal/Zfp830/Trp53/Mapk15	14
GO	BP	GO:0009584	detection of visible light	15/2267	37/17047	3.58544e-05	0.00264079	ENSMUSG00000021983/ENSMUSG00000029064/ENSMUSG00000030324/ENSMUSG00000031142/ENSMUSG00000031293/ENSMUSG00000031450/ENSMUSG00000031789/ENSMUSG00000034837/ENSMUSG00000035504/ENSMUSG00000037446/ENSMUSG00000038241/ENSMUSG00000041460/ENSMUSG00000042282/ENSMUSG00000046753/ENSMUSG00000056043	Atp8a2/Gnb1/Rho/Cacna1f/Rs1/Grk1/Cngb1/Gnat1/Reep6/Tulp1/Cep250/Cacna2d4/Gucy2f/Ccdc66/Rgs9bp	15
GO	BP	GO:0040029	regulation of gene expression, epigenetic	47/2267	197/17047	3.80036e-05	0.00276226	ENSMUSG00000000028/ENSMUSG00000006920/ENSMUSG00000015697/ENSMUSG00000017146/ENSMUSG00000017264/ENSMUSG00000018501/ENSMUSG00000020063/ENSMUSG00000020594/ENSMUSG00000020661/ENSMUSG00000020719/ENSMUSG00000020721/ENSMUSG00000021179/ENSMUSG00000022160/ENSMUSG00000023051/ENSMUSG00000023977/ENSMUSG00000024054/ENSMUSG00000024764/ENSMUSG00000026739/ENSMUSG00000027079/ENSMUSG00000028580/ENSMUSG00000028842/…	Cdc45/Ezh1/Setdb1/Brca1/Exosc10/Ncor1/Sirt1/Pum2/Dnmt3a/Ddx5/Helz/Nrde2/Mettl3/Tarbp2/Ubr2/Smchd1/Naa40/Bmi1/Clp1/Pum1/Ago3/Glmn/Atf7ip/Mecp2/Ythdc1/Hist1h1c/Cnot1/Ago2/Phf2/Arid4b/Suv39h1/Hnrnpu/Dicer1/Sin3a/Tnrc6b/Gigyf2/Rbm15/Kmt2d/Snip1/Crebzf/Hist1h1e/Atad2b/Ep300/Upf1/Trp53/Chrac1/Rbm15b	47
GO	BP	GO:0032200	telomere organization	33/2267	122/17047	3.91958e-05	0.00281191	ENSMUSG00000001415/ENSMUSG00000002948/ENSMUSG00000007589/ENSMUSG00000007646/ENSMUSG00000014426/ENSMUSG00000014907/ENSMUSG00000016559/ENSMUSG00000017264/ENSMUSG00000020413/ENSMUSG00000021270/ENSMUSG00000021972/ENSMUSG00000022234/ENSMUSG00000022471/ENSMUSG00000024170/ENSMUSG00000024811/ENSMUSG00000025925/ENSMUSG00000027185/ENSMUSG00000027323/ENSMUSG00000028884/ENSMUSG00000028952/ENSMUSG00000029454/…	Smg5/Map2k7/Tinf2/Rad51c/Map3k4/Naf1/H3f3b/Exosc10/Hus1/Hsp90aa1/Hmbox1/Cct5/Xrcc6/Telo2/Tnks2/Terf1/Nat10/Rad51/Rpa2/Zbtb48/Mapkapk5/Blm/Mre11a/Papd5/Mcrs1/Rtel1/Hnrnpu/Wrap53/Hnrnpa1/Upf1/Slx1b/Mapk15/Hspa1a	33
GO	BP	GO:0015931	nucleobase-containing compound transport	46/2267	192/17047	4.09238e-05	0.00289825	ENSMUSG00000001017/ENSMUSG00000002052/ENSMUSG00000002346/ENSMUSG00000003226/ENSMUSG00000007670/ENSMUSG00000008301/ENSMUSG00000015023/ENSMUSG00000016319/ENSMUSG00000018379/ENSMUSG00000020739/ENSMUSG00000020873/ENSMUSG00000022119/ENSMUSG00000022142/ENSMUSG00000022556/ENSMUSG00000022855/ENSMUSG00000024097/ENSMUSG00000024120/ENSMUSG00000024384/ENSMUSG00000024491/ENSMUSG00000024891/ENSMUSG00000026812/…	Chtop/Supt6/Slc25a42/Ranbp2/Khsrp/Phax/Ddx19a/Slc25a5/Srsf1/Nup85/Slc35b1/Rbm26/Nup155/Hsf1/Senp2/Srsf7/Lrpprc/Iws1/Rbm27/Slc29a2/Tsc1/Slc25a25/Sfpq/Slc25a33/Igf2bp3/Cetn2/Thoc5/Ythdc1/Aaas/Thoc2/Bicd2/Nup133/Hnrnpu/Nup88/Poldip3/Alkbh5/Setd2/Hnrnpa1/Nup160/Nup188/Nup107/Pom121/Mrpl18/Rbm15b/Zc3h3/Casc3	46
GO	BP	GO:0007098	centrosome cycle	32/2267	118/17047	4.82769e-05	0.00337572	ENSMUSG00000015095/ENSMUSG00000017146/ENSMUSG00000020212/ENSMUSG00000023066/ENSMUSG00000023345/ENSMUSG00000025437/ENSMUSG00000025758/ENSMUSG00000026504/ENSMUSG00000027496/ENSMUSG00000027959/ENSMUSG00000031347/ENSMUSG00000032534/ENSMUSG00000032782/ENSMUSG00000032902/ENSMUSG00000033904/ENSMUSG00000036390/ENSMUSG00000037443/ENSMUSG00000038047/ENSMUSG00000038070/ENSMUSG00000038241/ENSMUSG00000039298/…	Fbxw5/Brca1/Mdm1/Rttn/Poc1a/Usp33/Plk4/Sdccag8/Aurka/Sass6/Cetn2/Cep63/Cntrob/Slc16a1/Ccp110/Gadd45a/Cep85/Haus6/Cntln/Cep250/Cdk5rap2/2810417H13Rik/Crocc/Haus1/Spice1/Pard6b/Cep120/Tmem67/Syne2/Alms1/Cep152/Kifc1	32
GO	BP	GO:0000956	nuclear-transcribed mRNA catabolic process	28/2267	98/17047	5.13265e-05	0.0035441	ENSMUSG00000001415/ENSMUSG00000005682/ENSMUSG00000017264/ENSMUSG00000020362/ENSMUSG00000020495/ENSMUSG00000020576/ENSMUSG00000020719/ENSMUSG00000021962/ENSMUSG00000027752/ENSMUSG00000029647/ENSMUSG00000032410/ENSMUSG00000032498/ENSMUSG00000034724/ENSMUSG00000035139/ENSMUSG00000036550/ENSMUSG00000036572/ENSMUSG00000036698/ENSMUSG00000036779/ENSMUSG00000037573/ENSMUSG00000039356/ENSMUSG00000042167/…	Smg5/Pan2/Exosc10/Cnot6/Smg8/Nbas/Ddx5/Dcp1a/Exosc8/Pan3/Xrn1/Mlh1/Cnot6l/Secisbp2/Cnot1/Upf3b/Ago2/Papd5/Tob1/Exosc2/Papd4/Pde12/Tnrc6b/Ctif/Upf1/Csde1/Nanos1/Casc3	28
GO	MF	GO:0016796	exonuclease activity, active with either ribo- or deoxyribonucleic acids and producing 5'-phosphomonoesters	18/2282	48/17092	2.29003e-05	0.00391213	ENSMUSG00000005682/ENSMUSG00000017264/ENSMUSG00000020362/ENSMUSG00000022248/ENSMUSG00000025077/ENSMUSG00000026634/ENSMUSG00000027424/ENSMUSG00000028688/ENSMUSG00000029647/ENSMUSG00000031928/ENSMUSG00000032410/ENSMUSG00000032705/ENSMUSG00000033166/ENSMUSG00000033423/ENSMUSG00000034724/ENSMUSG00000036550/ENSMUSG00000038644/ENSMUSG00000043702	Pan2/Exosc10/Cnot6/Rad1/Dclre1a/Angel2/Mgme1/Toe1/Pan3/Mre11a/Xrn1/Exd2/Dis3/Eri3/Cnot6l/Cnot1/Pold1/Pde12	18
GO	BP	GO:1902749	regulation of cell cycle G2/M phase transition	27/2267	94/17047	6.27138e-05	0.00427693	ENSMUSG00000007646/ENSMUSG00000017146/ENSMUSG00000020381/ENSMUSG00000020413/ENSMUSG00000021635/ENSMUSG00000021932/ENSMUSG00000022314/ENSMUSG00000022960/ENSMUSG00000024590/ENSMUSG00000026605/ENSMUSG00000029022/ENSMUSG00000029283/ENSMUSG00000030528/ENSMUSG00000031201/ENSMUSG00000031393/ENSMUSG00000031878/ENSMUSG00000031928/ENSMUSG00000035234/ENSMUSG00000041560/ENSMUSG00000042557/ENSMUSG00000046010/…	Rad51c/Brca1/3010026O09Rik/Hus1/Rad17/Rnaseh2b/Rad21/Donson/Lmnb1/Cenpf/Miip/Cdc7/Blm/Brcc3/Mecp2/Nae1/Mre11a/Fam175a/Gltscr2/Sin3a/Zfp830/Pbx1/Camk2d/Rad51b/Usp47/Taok2/Taok3	27
GO	MF	GO:0140097	catalytic activity, acting on DNA	42/2282	168/17092	3.31288e-05	0.00441035	ENSMUSG00000000028/ENSMUSG00000000934/ENSMUSG00000002814/ENSMUSG00000007646/ENSMUSG00000015971/ENSMUSG00000017485/ENSMUSG00000020079/ENSMUSG00000020661/ENSMUSG00000020718/ENSMUSG00000020752/ENSMUSG00000020974/ENSMUSG00000021668/ENSMUSG00000022248/ENSMUSG00000022471/ENSMUSG00000024136/ENSMUSG00000024382/ENSMUSG00000025077/ENSMUSG00000025925/ENSMUSG00000027323/ENSMUSG00000027424/ENSMUSG00000028089/…	Cdc45/Top1mt/Top3a/Rad51c/Actr8/Top2b/Supv3l1/Dnmt3a/Polg2/Recql5/Pole2/Polk/Rad1/Xrcc6/Dnase1l2/Ercc3/Dclre1a/Terf1/Rad51/Mgme1/Chd1l/Aplf/Recql/Blm/Pold3/Gins4/Mre11a/Dhx30/Exd2/Polq/Neil2/Helq/Ddx11/Pold1/Rtel1/Alkbh3/Lig4/Chd8/Tatdn2/Slx1b/Chrac1/Rad54b	42
GO	MF	GO:0008408	3'-5' exonuclease activity	17/2282	45/17092	3.44222e-05	0.00441035	ENSMUSG00000005682/ENSMUSG00000017264/ENSMUSG00000020362/ENSMUSG00000022248/ENSMUSG00000026634/ENSMUSG00000028688/ENSMUSG00000029647/ENSMUSG00000030051/ENSMUSG00000031928/ENSMUSG00000032705/ENSMUSG00000033166/ENSMUSG00000033423/ENSMUSG00000034724/ENSMUSG00000036550/ENSMUSG00000038569/ENSMUSG00000038644/ENSMUSG00000043702	Pan2/Exosc10/Cnot6/Rad1/Angel2/Toe1/Pan3/Aplf/Mre11a/Exd2/Dis3/Eri3/Cnot6l/Cnot1/Rad9b/Pold1/Pde12	17
GO	BP	GO:0003341	cilium movement	22/2267	70/17047	6.72484e-05	0.00453025	ENSMUSG00000003354/ENSMUSG00000006464/ENSMUSG00000018707/ENSMUSG00000020930/ENSMUSG00000025857/ENSMUSG00000027274/ENSMUSG00000028294/ENSMUSG00000029442/ENSMUSG00000031755/ENSMUSG00000031796/ENSMUSG00000031831/ENSMUSG00000033276/ENSMUSG00000035126/ENSMUSG00000035394/ENSMUSG00000035984/ENSMUSG00000039632/ENSMUSG00000040220/ENSMUSG00000040936/ENSMUSG00000041035/ENSMUSG00000043020/ENSMUSG00000056752/…	Ccdc65/Bbs1/Dync1h1/Ccdc103/Heatr2/Mkks/1700003M02Rik/Wdr66/Bbs2/Gtl3/Dnaaf1/Stk36/Wdr78/Ccdc11/Nme5/Ccdc151/Gas8/Ulk4/Dpcd/Wdr63/Dnah9/Spef2	22
GO	BP	GO:0000723	telomere maintenance	32/2267	120/17047	6.88229e-05	0.00458046	ENSMUSG00000001415/ENSMUSG00000002948/ENSMUSG00000007589/ENSMUSG00000007646/ENSMUSG00000014426/ENSMUSG00000014907/ENSMUSG00000017264/ENSMUSG00000020413/ENSMUSG00000021270/ENSMUSG00000021972/ENSMUSG00000022234/ENSMUSG00000022471/ENSMUSG00000024170/ENSMUSG00000024811/ENSMUSG00000025925/ENSMUSG00000027185/ENSMUSG00000027323/ENSMUSG00000028884/ENSMUSG00000028952/ENSMUSG00000029454/ENSMUSG00000030528/…	Smg5/Map2k7/Tinf2/Rad51c/Map3k4/Naf1/Exosc10/Hus1/Hsp90aa1/Hmbox1/Cct5/Xrcc6/Telo2/Tnks2/Terf1/Nat10/Rad51/Rpa2/Zbtb48/Mapkapk5/Blm/Mre11a/Papd5/Mcrs1/Rtel1/Hnrnpu/Wrap53/Hnrnpa1/Upf1/Slx1b/Mapk15/Hspa1a	32
GO	BP	GO:0032259	methylation	69/2267	330/17047	7.40177e-05	0.00483019	ENSMUSG00000001017/ENSMUSG00000002052/ENSMUSG00000004127/ENSMUSG00000005609/ENSMUSG00000006307/ENSMUSG00000006920/ENSMUSG00000010554/ENSMUSG00000015697/ENSMUSG00000017146/ENSMUSG00000017548/ENSMUSG00000019795/ENSMUSG00000020063/ENSMUSG00000020659/ENSMUSG00000020661/ENSMUSG00000021311/ENSMUSG00000022160/ENSMUSG00000024067/ENSMUSG00000024193/ENSMUSG00000024251/ENSMUSG00000024384/ENSMUSG00000026439/…	Chtop/Supt6/Trmt10a/Ctr9/Kmt2b/Ezh1/Mettl16/Setdb1/Brca1/Suz12/Pcmt1/Sirt1/Cbll1/Dnmt3a/Mtr/Mettl3/Dpy30/Phf1/Thada/Iws1/Rbbp5/Suv39h2/Mettl13/Trdmt1/Bmi1/Pcmtd2/Pik3ca/Mettl14/Kdm4c/Kmt2e/Mthfr/Trmt44/Atf7ip/Mecp2/Hemk1/Amt/Wdr5b/Tet3/Prdm4/Hist1h1c/Ehmt1/Trmt12/Kmt2c/Prdm1/Jarid2/Fam173b/Arid4b/Suv39h1/Icmt/Pcif1/1110037F02Rik/Tet2/Tdrkh/Trmt10c/Setd2/Suv420h1/Rbm15/Kmt2d/Rlf/Hist1h1e/Prdm9/Kdm…	69
GO	BP	GO:0031440	regulation of mRNA 3'-end processing	2267-12-01	27/17047	7.43241e-05	0.00483019	ENSMUSG00000003435/ENSMUSG00000005609/ENSMUSG00000011960/ENSMUSG00000021012/ENSMUSG00000022556/ENSMUSG00000026361/ENSMUSG00000027893/ENSMUSG00000030816/ENSMUSG00000034820/ENSMUSG00000040720/ENSMUSG00000042487/ENSMUSG00000075600	Supt5/Ctr9/Ccnt1/Zc3h14/Hsf1/Cdc73/Ahcyl1/Rnf40/Cpsf7/1110037F02Rik/Leo1/Zc3h3	12
GO	BP	GO:0071478	cellular response to radiation	39/2267	158/17047	7.68473e-05	0.00492276	ENSMUSG00000003068/ENSMUSG00000004655/ENSMUSG00000020063/ENSMUSG00000020366/ENSMUSG00000020413/ENSMUSG00000020694/ENSMUSG00000021668/ENSMUSG00000022141/ENSMUSG00000022160/ENSMUSG00000022248/ENSMUSG00000022471/ENSMUSG00000022556/ENSMUSG00000024740/ENSMUSG00000025900/ENSMUSG00000026831/ENSMUSG00000027282/ENSMUSG00000027323/ENSMUSG00000027699/ENSMUSG00000028211/ENSMUSG00000029238/ENSMUSG00000030324/…	Stk11/Aqp1/Sirt1/Mapk9/Hus1/Tlk2/Polk/Nipbl/Mettl3/Rad1/Xrcc6/Hsf1/Ddb1/Rp1/1700007K13Rik/Mtch2/Rad51/Ect2/Trp53inp1/Clock/Rho/Rad51ap1/Blm/Rs1/Grk1/Gnat1/Fignl1/Gadd45a/Rad9b/Pold1/Pik3r1/Papd4/Trp53bp1/Lig4/Ep300/Usp47/Trp53/Myeov2/Mc1r	39
GO	BP	GO:0000075	cell cycle checkpoint	41/2267	169/17047	7.75309e-05	0.00492276	ENSMUSG00000010342/ENSMUSG00000014668/ENSMUSG00000017146/ENSMUSG00000017421/ENSMUSG00000017485/ENSMUSG00000020038/ENSMUSG00000020381/ENSMUSG00000020413/ENSMUSG00000021635/ENSMUSG00000021932/ENSMUSG00000022248/ENSMUSG00000022960/ENSMUSG00000024151/ENSMUSG00000025646/ENSMUSG00000025925/ENSMUSG00000027242/ENSMUSG00000028884/ENSMUSG00000029238/ENSMUSG00000029863/ENSMUSG00000029910/ENSMUSG00000030528/…	Tex14/Chfr/Brca1/Zfp207/Top2b/Cry1/3010026O09Rik/Hus1/Rad17/Rnaseh2b/Rad1/Donson/Msh2/Atrip/Terf1/Wdr76/Rpa2/Clock/Casp2/Mad2l1/Blm/Anapc15/Brcc3/Cul4a/Nae1/Mre11a/Cep63/Rfwd3/Ccar2/Thoc5/Mad2l1bp/Fam175a/Rad9b/Cdk5rap2/Gltscr2/Trp53bp1/Zfp830/Gigyf2/Trp53/Taok2/Taok3	41
GO	BP	GO:0043487	regulation of RNA stability	26/2267	91/17047	9.37975e-05	0.00588792	ENSMUSG00000007670/ENSMUSG00000010554/ENSMUSG00000014907/ENSMUSG00000020594/ENSMUSG00000021012/ENSMUSG00000023495/ENSMUSG00000026634/ENSMUSG00000027201/ENSMUSG00000028114/ENSMUSG00000028580/ENSMUSG00000028639/ENSMUSG00000028991/ENSMUSG00000031060/ENSMUSG00000034724/ENSMUSG00000036779/ENSMUSG00000039630/ENSMUSG00000041459/ENSMUSG00000042167/ENSMUSG00000042650/ENSMUSG00000043702/ENSMUSG00000045193/…	Khsrp/Mettl16/Naf1/Pum2/Zc3h14/Pcbp4/Angel2/Myef2/Mettl14/Pum1/Ybx1/Mtor/Rbm10/Cnot6l/Papd5/Hnrnpu/Tardbp/Papd4/Alkbh5/Pde12/Cirbp/Ythdf3/Gigyf2/Upf1/Hnrnpm/Hnrnpr	26
GO	BP	GO:0000724	double-strand break repair via homologous recombination	32/2267	122/17047	9.69565e-05	0.00601784	ENSMUSG00000000028/ENSMUSG00000007646/ENSMUSG00000017146/ENSMUSG00000020381/ENSMUSG00000020413/ENSMUSG00000020752/ENSMUSG00000022141/ENSMUSG00000024054/ENSMUSG00000027323/ENSMUSG00000027353/ENSMUSG00000028820/ENSMUSG00000028884/ENSMUSG00000029283/ENSMUSG00000030243/ENSMUSG00000030346/ENSMUSG00000030528/ENSMUSG00000031546/ENSMUSG00000031928/ENSMUSG00000032705/ENSMUSG00000033596/ENSMUSG00000034206/…	Cdc45/Rad51c/Brca1/3010026O09Rik/Hus1/Recql5/Nipbl/Smchd1/Rad51/Mcm8/Sfpq/Rpa2/Cdc7/Recql/Rad51ap1/Blm/Gins4/Mre11a/Exd2/Rfwd3/Polq/Helq/Fignl1/Rtel1/Wrap53/Trp53bp1/Setd2/Swsap1/Rad51b/Slx1b/Zfyve26/Rad54b	32
GO	BP	GO:0090503	RNA phosphodiester bond hydrolysis, exonucleolytic	14/2267	36/17047	0.000111589	0.00680615	ENSMUSG00000005682/ENSMUSG00000017264/ENSMUSG00000020362/ENSMUSG00000026634/ENSMUSG00000027752/ENSMUSG00000028688/ENSMUSG00000029647/ENSMUSG00000032410/ENSMUSG00000033166/ENSMUSG00000033423/ENSMUSG00000034724/ENSMUSG00000036550/ENSMUSG00000039356/ENSMUSG00000043702	Pan2/Exosc10/Cnot6/Angel2/Exosc8/Toe1/Pan3/Xrn1/Dis3/Eri3/Cnot6l/Cnot1/Exosc2/Pde12	14
GO	BP	GO:1900363	regulation of mRNA polyadenylation	2267-09-01	17/17047	0.000113504	0.00680615	ENSMUSG00000003435/ENSMUSG00000005609/ENSMUSG00000011960/ENSMUSG00000021012/ENSMUSG00000022556/ENSMUSG00000030816/ENSMUSG00000034820/ENSMUSG00000040720/ENSMUSG00000075600	Supt5/Ctr9/Ccnt1/Zc3h14/Hsf1/Rnf40/Cpsf7/1110037F02Rik/Zc3h3	9
GO	BP	GO:0007602	phototransduction	2267-12-01	28/17047	0.000114385	0.00680615	ENSMUSG00000020907/ENSMUSG00000023979/ENSMUSG00000023982/ENSMUSG00000024842/ENSMUSG00000026239/ENSMUSG00000029064/ENSMUSG00000029663/ENSMUSG00000030324/ENSMUSG00000031293/ENSMUSG00000031450/ENSMUSG00000031789/ENSMUSG00000034837	Rcvrn/Guca1b/Guca1a/Cabp4/Pde6d/Gnb1/Gngt1/Rho/Rs1/Grk1/Cngb1/Gnat1	12
GO	BP	GO:0000725	recombinational repair	32/2267	123/17047	0.000114586	0.00680615	ENSMUSG00000000028/ENSMUSG00000007646/ENSMUSG00000017146/ENSMUSG00000020381/ENSMUSG00000020413/ENSMUSG00000020752/ENSMUSG00000022141/ENSMUSG00000024054/ENSMUSG00000027323/ENSMUSG00000027353/ENSMUSG00000028820/ENSMUSG00000028884/ENSMUSG00000029283/ENSMUSG00000030243/ENSMUSG00000030346/ENSMUSG00000030528/ENSMUSG00000031546/ENSMUSG00000031928/ENSMUSG00000032705/ENSMUSG00000033596/ENSMUSG00000034206/…	Cdc45/Rad51c/Brca1/3010026O09Rik/Hus1/Recql5/Nipbl/Smchd1/Rad51/Mcm8/Sfpq/Rpa2/Cdc7/Recql/Rad51ap1/Blm/Gins4/Mre11a/Exd2/Rfwd3/Polq/Helq/Fignl1/Rtel1/Wrap53/Trp53bp1/Setd2/Swsap1/Rad51b/Slx1b/Zfyve26/Rad54b	32
GO	MF	GO:0003678	DNA helicase activity	16/2282	43/17092	7.22292e-05	0.00684989	ENSMUSG00000000028/ENSMUSG00000015971/ENSMUSG00000020079/ENSMUSG00000020752/ENSMUSG00000022471/ENSMUSG00000024382/ENSMUSG00000028089/ENSMUSG00000030243/ENSMUSG00000030528/ENSMUSG00000031546/ENSMUSG00000031928/ENSMUSG00000032480/ENSMUSG00000035266/ENSMUSG00000035842/ENSMUSG00000038685/ENSMUSG00000053754	Cdc45/Actr8/Supv3l1/Recql5/Xrcc6/Ercc3/Chd1l/Recql/Blm/Gins4/Mre11a/Dhx30/Helq/Ddx11/Rtel1/Chd8	16
GO	MF	GO:0008026	ATP-dependent helicase activity	20/2282	61/17092	7.74925e-05	0.00684989	ENSMUSG00000003660/ENSMUSG00000015971/ENSMUSG00000016018/ENSMUSG00000020079/ENSMUSG00000020719/ENSMUSG00000020752/ENSMUSG00000022471/ENSMUSG00000024382/ENSMUSG00000024422/ENSMUSG00000028089/ENSMUSG00000030243/ENSMUSG00000030528/ENSMUSG00000031928/ENSMUSG00000032480/ENSMUSG00000034931/ENSMUSG00000035266/ENSMUSG00000035842/ENSMUSG00000037993/ENSMUSG00000038685/ENSMUSG00000058301	Snrnp200/Actr8/Skiv2l2/Supv3l1/Ddx5/Recql5/Xrcc6/Ercc3/Dhx16/Chd1l/Recql/Blm/Mre11a/Dhx30/Dhx8/Helq/Ddx11/Dhx38/Rtel1/Upf1	20
GO	MF	GO:0070035	purine NTP-dependent helicase activity	20/2282	61/17092	7.74925e-05	0.00684989	ENSMUSG00000003660/ENSMUSG00000015971/ENSMUSG00000016018/ENSMUSG00000020079/ENSMUSG00000020719/ENSMUSG00000020752/ENSMUSG00000022471/ENSMUSG00000024382/ENSMUSG00000024422/ENSMUSG00000028089/ENSMUSG00000030243/ENSMUSG00000030528/ENSMUSG00000031928/ENSMUSG00000032480/ENSMUSG00000034931/ENSMUSG00000035266/ENSMUSG00000035842/ENSMUSG00000037993/ENSMUSG00000038685/ENSMUSG00000058301	Snrnp200/Actr8/Skiv2l2/Supv3l1/Ddx5/Recql5/Xrcc6/Ercc3/Dhx16/Chd1l/Recql/Blm/Mre11a/Dhx30/Dhx8/Helq/Ddx11/Dhx38/Rtel1/Upf1	20
GO	MF	GO:0000993	RNA polymerase II complex binding	14/2282	35/17092	8.11339e-05	0.00684989	ENSMUSG00000005609/ENSMUSG00000020752/ENSMUSG00000021255/ENSMUSG00000022828/ENSMUSG00000024271/ENSMUSG00000026361/ENSMUSG00000033712/ENSMUSG00000036698/ENSMUSG00000038406/ENSMUSG00000039630/ENSMUSG00000039849/ENSMUSG00000041328/ENSMUSG00000042487/ENSMUSG00000046201	Ctr9/Recql5/Esrrb/Gtf2e1/Elp2/Cdc73/Ccar2/Ago2/Scaf1/Hnrnpu/Pcif1/Pcf11/Leo1/Scaf8	14
GO	MF	GO:0019783	ubiquitin-like protein-specific protease activity	28/2282	101/17092	9.87009e-05	0.00684989	ENSMUSG00000006676/ENSMUSG00000019850/ENSMUSG00000022710/ENSMUSG00000022855/ENSMUSG00000025437/ENSMUSG00000025616/ENSMUSG00000026502/ENSMUSG00000029640/ENSMUSG00000031201/ENSMUSG00000031634/ENSMUSG00000031826/ENSMUSG00000032376/ENSMUSG00000033364/ENSMUSG00000033909/ENSMUSG00000034235/ENSMUSG00000036990/ENSMUSG00000038495/ENSMUSG00000041161/ENSMUSG00000041718/ENSMUSG00000043415/ENSMUSG00000045210/…	Usp19/Tnfaip3/Usp7/Senp2/Usp33/Usp16/Desi2/Usp12/Brcc3/Ufsp2/Usp10/Usp3/Usp37/Usp36/Usp54/Otud4/Otud7b/Otud3/Alg13/Otud1/Vcpip1/Yod1/Usp21/Usp34/Usp47/Mysm1/Usp31/Usp49	28
GO	MF	GO:0036459	thiol-dependent ubiquitinyl hydrolase activity	26/2282	91/17092	0.000100242	0.00684989	ENSMUSG00000006676/ENSMUSG00000019850/ENSMUSG00000022710/ENSMUSG00000025437/ENSMUSG00000025616/ENSMUSG00000026502/ENSMUSG00000029640/ENSMUSG00000031201/ENSMUSG00000031826/ENSMUSG00000032376/ENSMUSG00000033364/ENSMUSG00000033909/ENSMUSG00000034235/ENSMUSG00000036990/ENSMUSG00000038495/ENSMUSG00000041161/ENSMUSG00000041718/ENSMUSG00000043415/ENSMUSG00000045210/ENSMUSG00000046404/ENSMUSG00000053483/…	Usp19/Tnfaip3/Usp7/Usp33/Usp16/Desi2/Usp12/Brcc3/Usp10/Usp3/Usp37/Usp36/Usp54/Otud4/Otud7b/Otud3/Alg13/Otud1/Vcpip1/Yod1/Usp21/Usp34/Usp47/Mysm1/Usp31/Usp49	26
GO	MF	GO:0101005	ubiquitinyl hydrolase activity	26/2282	91/17092	0.000100242	0.00684989	ENSMUSG00000006676/ENSMUSG00000019850/ENSMUSG00000022710/ENSMUSG00000025437/ENSMUSG00000025616/ENSMUSG00000026502/ENSMUSG00000029640/ENSMUSG00000031201/ENSMUSG00000031826/ENSMUSG00000032376/ENSMUSG00000033364/ENSMUSG00000033909/ENSMUSG00000034235/ENSMUSG00000036990/ENSMUSG00000038495/ENSMUSG00000041161/ENSMUSG00000041718/ENSMUSG00000043415/ENSMUSG00000045210/ENSMUSG00000046404/ENSMUSG00000053483/…	Usp19/Tnfaip3/Usp7/Usp33/Usp16/Desi2/Usp12/Brcc3/Usp10/Usp3/Usp37/Usp36/Usp54/Otud4/Otud7b/Otud3/Alg13/Otud1/Vcpip1/Yod1/Usp21/Usp34/Usp47/Mysm1/Usp31/Usp49	26
GO	BP	GO:2001020	regulation of response to DNA damage stimulus	46/2267	201/17047	0.000132455	0.00778385	ENSMUSG00000000552/ENSMUSG00000004934/ENSMUSG00000010154/ENSMUSG00000017146/ENSMUSG00000017485/ENSMUSG00000020038/ENSMUSG00000020063/ENSMUSG00000020381/ENSMUSG00000020719/ENSMUSG00000020752/ENSMUSG00000021694/ENSMUSG00000021918/ENSMUSG00000021932/ENSMUSG00000022556/ENSMUSG00000024054/ENSMUSG00000026219/ENSMUSG00000027242/ENSMUSG00000027282/ENSMUSG00000027323/ENSMUSG00000028884/ENSMUSG00000028886/…	Zfp385a/Pias4/Spire2/Brca1/Top2b/Cry1/Sirt1/3010026O09Rik/Ddx5/Recql5/Ercc8/Nek4/Rnaseh2b/Hsf1/Smchd1/Trip12/Wdr76/Mtch2/Rad51/Rpa2/Eya3/Rad51ap1/Blm/Brcc3/Cul4a/Rfwd3/Ccar2/Polq/Thoc5/Fam175a/Fignl1/Ddx11/9630033F20Rik/Rtel1/Suv39h1/Nsmce4a/Wrap53/Trp53bp1/Setd2/Pla2r1/Rnf169/Usp47/Trp53/Cxcl12/1700052N19Rik/Hdac10	46
GO	BP	GO:0080009	mRNA methylation	2267-08-01	14/17047	0.000137417	0.00799041	ENSMUSG00000010554/ENSMUSG00000020659/ENSMUSG00000022160/ENSMUSG00000028114/ENSMUSG00000039849/ENSMUSG00000040720/ENSMUSG00000044763/ENSMUSG00000060475	Mettl16/Cbll1/Mettl3/Mettl14/Pcif1/1110037F02Rik/Trmt10c/Wtap	8
GO	CC	GO:0036038	MKS complex	2279-07-01	12/17165	0.00030955	0.00801512	ENSMUSG00000019971/ENSMUSG00000020895/ENSMUSG00000031951/ENSMUSG00000034121/ENSMUSG00000038593/ENSMUSG00000039765/ENSMUSG00000049488	Cep290/Tmem107/Tmem231/Mks1/Tctn1/Cc2d2a/Tmem67	7
GO	MF	GO:0003729	mRNA binding	53/2282	240/17092	0.000127794	0.00818681	ENSMUSG00000000552/ENSMUSG00000003435/ENSMUSG00000007670/ENSMUSG00000015165/ENSMUSG00000018379/ENSMUSG00000020594/ENSMUSG00000020719/ENSMUSG00000020770/ENSMUSG00000021270/ENSMUSG00000021707/ENSMUSG00000022119/ENSMUSG00000022160/ENSMUSG00000022234/ENSMUSG00000023495/ENSMUSG00000024491/ENSMUSG00000026634/ENSMUSG00000027176/ENSMUSG00000027201/ENSMUSG00000027752/ENSMUSG00000028114/ENSMUSG00000028580/…	Zfp385a/Supt5/Khsrp/Hnrnpl/Srsf1/Pum2/Ddx5/Unk/Hsp90aa1/Dhfr/Rbm26/Mettl3/Cct5/Pcbp4/Rbm27/Angel2/Cstf3/Myef2/Exosc8/Mettl14/Pum1/Ybx1/Srsf4/Slc4a1ap/Igf2bp3/Cnbp/Ybx3/Rnf40/Tial1/Rbmx/Mecp2/Ireb2/Secisbp2/Tdrd7/Upf3b/Ago2/Thoc2/Rara/Hnrnpu/Srrm3/Aqr/Esrp1/Pcf11/Tardbp/Cirbp/Scaf8/Hnrnpa1/Rbm15/Snip1/Cstf2t/Hnrnpm/Trp53/Hnrnpr	53
GO	BP	GO:0016458	gene silencing	43/2267	185/17047	0.000149635	0.00861026	ENSMUSG00000000028/ENSMUSG00000006307/ENSMUSG00000006920/ENSMUSG00000015697/ENSMUSG00000018501/ENSMUSG00000020063/ENSMUSG00000020362/ENSMUSG00000020594/ENSMUSG00000020661/ENSMUSG00000020719/ENSMUSG00000020721/ENSMUSG00000021179/ENSMUSG00000022160/ENSMUSG00000023051/ENSMUSG00000023977/ENSMUSG00000024054/ENSMUSG00000024764/ENSMUSG00000026739/ENSMUSG00000027079/ENSMUSG00000028580/ENSMUSG00000028842/…	Cdc45/Kmt2b/Ezh1/Setdb1/Ncor1/Sirt1/Cnot6/Pum2/Dnmt3a/Ddx5/Helz/Nrde2/Mettl3/Tarbp2/Ubr2/Smchd1/Naa40/Bmi1/Clp1/Pum1/Ago3/Atf7ip/Mecp2/Cnot6l/Hist1h1c/Cnot1/Ago2/Phf2/Suv39h1/Dicer1/Tdrkh/Sin3a/Tnrc6b/Gigyf2/Kmt2d/Snip1/Hist1h1e/Atad2b/Srcap/Ddx17/Cnot10/Trp53/Chrac1	43
GO	MF	GO:0008094	DNA-dependent ATPase activity	24/2282	83/17092	0.000149085	0.00898897	ENSMUSG00000006599/ENSMUSG00000007646/ENSMUSG00000015971/ENSMUSG00000017485/ENSMUSG00000020752/ENSMUSG00000021635/ENSMUSG00000022471/ENSMUSG00000024151/ENSMUSG00000024382/ENSMUSG00000027323/ENSMUSG00000028089/ENSMUSG00000030243/ENSMUSG00000030528/ENSMUSG00000031928/ENSMUSG00000032480/ENSMUSG00000034206/ENSMUSG00000035266/ENSMUSG00000035842/ENSMUSG00000038685/ENSMUSG00000046691/ENSMUSG00000053754/…	Gtf2h1/Rad51c/Actr8/Top2b/Recql5/Rad17/Xrcc6/Msh2/Ercc3/Rad51/Chd1l/Recql/Blm/Mre11a/Dhx30/Polq/Helq/Ddx11/Rtel1/Chtf8/Chd8/Chd6/Rad51b/Rad54b	24
GO	BP	GO:0051168	nuclear export	34/2267	136/17047	0.000165347	0.00938403	ENSMUSG00000001017/ENSMUSG00000002052/ENSMUSG00000002372/ENSMUSG00000002718/ENSMUSG00000008301/ENSMUSG00000020739/ENSMUSG00000020982/ENSMUSG00000022119/ENSMUSG00000022142/ENSMUSG00000022391/ENSMUSG00000024384/ENSMUSG00000024491/ENSMUSG00000024604/ENSMUSG00000026667/ENSMUSG00000026812/ENSMUSG00000027893/ENSMUSG00000031451/ENSMUSG00000033411/ENSMUSG00000034274/ENSMUSG00000035851/ENSMUSG00000037475/…	Chtop/Supt6/Ranbp3/Cse1l/Phax/Nup85/Nemf/Rbm26/Nup155/Rangap1/Iws1/Rbm27/Rbm22/Uhmk1/Tsc1/Ahcyl1/Gas6/Ctdspl2/Thoc5/Ythdc1/Thoc2/Nup133/Nup88/Poldip3/Alkbh5/Setd2/Hnrnpa1/Nupl2/Nup160/Nup107/Styx/Strada/Gm14698/Rbm15b	34
GO	BP	GO:0010833	telomere maintenance via telomere lengthening	22/2267	74/17047	0.000168179	0.00938403	ENSMUSG00000001415/ENSMUSG00000002948/ENSMUSG00000007589/ENSMUSG00000014426/ENSMUSG00000014907/ENSMUSG00000017264/ENSMUSG00000021270/ENSMUSG00000021972/ENSMUSG00000022234/ENSMUSG00000024811/ENSMUSG00000025925/ENSMUSG00000027185/ENSMUSG00000027323/ENSMUSG00000028952/ENSMUSG00000029454/ENSMUSG00000036779/ENSMUSG00000037570/ENSMUSG00000038685/ENSMUSG00000039630/ENSMUSG00000041346/ENSMUSG00000046434/…	Smg5/Map2k7/Tinf2/Map3k4/Naf1/Exosc10/Hsp90aa1/Hmbox1/Cct5/Tnks2/Terf1/Nat10/Rad51/Zbtb48/Mapkapk5/Papd5/Mcrs1/Rtel1/Hnrnpu/Wrap53/Hnrnpa1/Mapk15	22
GO	BP	GO:1902117	positive regulation of organelle assembly	22/2267	74/17047	0.000168179	0.00938403	ENSMUSG00000005682/ENSMUSG00000018707/ENSMUSG00000020362/ENSMUSG00000020366/ENSMUSG00000025417/ENSMUSG00000025758/ENSMUSG00000025900/ENSMUSG00000027883/ENSMUSG00000029647/ENSMUSG00000032221/ENSMUSG00000033904/ENSMUSG00000034724/ENSMUSG00000036550/ENSMUSG00000037062/ENSMUSG00000040860/ENSMUSG00000046985/ENSMUSG00000047388/ENSMUSG00000048799/ENSMUSG00000055024/ENSMUSG00000058230/ENSMUSG00000063704/…	Pan2/Dync1h1/Cnot6/Mapk9/Pip4k2c/Plk4/Rp1/Gpsm2/Pan3/Mns1/Ccp110/Cnot6l/Cnot1/Sh3glb1/Crocc/Tapt1/Atmin/Cep120/Ep300/Arhgap35/Mapk15/Ttbk2	22
GO	MF	GO:0004527	exonuclease activity	21/2282	69/17092	0.000172407	0.00962091	ENSMUSG00000005682/ENSMUSG00000017264/ENSMUSG00000020362/ENSMUSG00000022248/ENSMUSG00000025077/ENSMUSG00000026634/ENSMUSG00000027424/ENSMUSG00000028688/ENSMUSG00000029647/ENSMUSG00000030051/ENSMUSG00000031928/ENSMUSG00000032410/ENSMUSG00000032705/ENSMUSG00000033166/ENSMUSG00000033423/ENSMUSG00000034724/ENSMUSG00000036550/ENSMUSG00000038569/ENSMUSG00000038644/ENSMUSG00000043702/ENSMUSG00000047417	Pan2/Exosc10/Cnot6/Rad1/Dclre1a/Angel2/Mgme1/Toe1/Pan3/Aplf/Mre11a/Xrn1/Exd2/Dis3/Eri3/Cnot6l/Cnot1/Rad9b/Pold1/Pde12/Rexo1	21
GO	MF	GO:0016896	exoribonuclease activity, producing 5'-phosphomonoesters	2282-12-01	29/17092	0.000178339	0.00962091	ENSMUSG00000005682/ENSMUSG00000017264/ENSMUSG00000020362/ENSMUSG00000026634/ENSMUSG00000028688/ENSMUSG00000029647/ENSMUSG00000032410/ENSMUSG00000033166/ENSMUSG00000033423/ENSMUSG00000034724/ENSMUSG00000036550/ENSMUSG00000043702	Pan2/Exosc10/Cnot6/Angel2/Toe1/Pan3/Xrn1/Dis3/Eri3/Cnot6l/Cnot1/Pde12	12
GO	BP	GO:1901988	negative regulation of cell cycle phase transition	36/2267	148/17047	0.000194612	0.0106669	ENSMUSG00000010342/ENSMUSG00000015133/ENSMUSG00000017146/ENSMUSG00000017421/ENSMUSG00000020381/ENSMUSG00000020413/ENSMUSG00000021635/ENSMUSG00000022018/ENSMUSG00000022314/ENSMUSG00000022960/ENSMUSG00000024922/ENSMUSG00000025925/ENSMUSG00000026361/ENSMUSG00000028884/ENSMUSG00000029022/ENSMUSG00000029863/ENSMUSG00000029910/ENSMUSG00000030528/ENSMUSG00000030649/ENSMUSG00000031201/ENSMUSG00000031666/…	Tex14/Lrrk1/Brca1/Zfp207/3010026O09Rik/Hus1/Rad17/Rgcc/Rad21/Donson/Ovol1/Terf1/Cdc73/Rpa2/Miip/Casp2/Mad2l1/Blm/Anapc15/Brcc3/Rbl2/Nae1/Mre11a/Rfwd3/Mad2l1bp/Fam175a/Cdk5rap2/Gltscr2/Zfp830/Gigyf2/Dcun1d3/Usp47/Trp53/Taok2/Taok3/2610528A11Rik	36
GO	BP	GO:0010972	negative regulation of G2/M transition of mitotic cell cycle	15/2267	42/17047	0.000196964	0.0106669	ENSMUSG00000017146/ENSMUSG00000020381/ENSMUSG00000020413/ENSMUSG00000021635/ENSMUSG00000022314/ENSMUSG00000022960/ENSMUSG00000029022/ENSMUSG00000030528/ENSMUSG00000031878/ENSMUSG00000031928/ENSMUSG00000041560/ENSMUSG00000046010/ENSMUSG00000059263/ENSMUSG00000059981/ENSMUSG00000061288	Brca1/3010026O09Rik/Hus1/Rad17/Rad21/Donson/Miip/Blm/Nae1/Mre11a/Gltscr2/Zfp830/Usp47/Taok2/Taok3	15
GO	BP	GO:0061014	positive regulation of mRNA catabolic process	15/2267	42/17047	0.000196964	0.0106669	ENSMUSG00000007670/ENSMUSG00000010554/ENSMUSG00000028114/ENSMUSG00000028580/ENSMUSG00000034724/ENSMUSG00000036550/ENSMUSG00000036698/ENSMUSG00000037573/ENSMUSG00000042535/ENSMUSG00000047213/ENSMUSG00000047888/ENSMUSG00000048000/ENSMUSG00000058301/ENSMUSG00000066037/ENSMUSG00000072437	Khsrp/Mettl16/Mettl14/Pum1/Cnot6l/Cnot1/Ago2/Tob1/Gtpbp1/Ythdf3/Tnrc6b/Gigyf2/Upf1/Hnrnpr/Nanos1	15
GO	BP	GO:2001252	positive regulation of chromosome organization	41/2267	176/17047	0.000200136	0.0107335	ENSMUSG00000001017/ENSMUSG00000002948/ENSMUSG00000004364/ENSMUSG00000005609/ENSMUSG00000014426/ENSMUSG00000014907/ENSMUSG00000015697/ENSMUSG00000017146/ENSMUSG00000018651/ENSMUSG00000018974/ENSMUSG00000020063/ENSMUSG00000020538/ENSMUSG00000021972/ENSMUSG00000022141/ENSMUSG00000022234/ENSMUSG00000022314/ENSMUSG00000024045/ENSMUSG00000024193/ENSMUSG00000024811/ENSMUSG00000025925/ENSMUSG00000028820/…	Chtop/Map2k7/Cul3/Ctr9/Map3k4/Naf1/Setdb1/Brca1/Tada2a/Sart3/Sirt1/Srebf1/Hmbox1/Nipbl/Cct5/Rad21/Akap8/Phf1/Tnks2/Terf1/Sfpq/Kmt2e/Mapkapk5/Atf7ip/Rnf40/Mecp2/Mre11a/Ddx11/Jarid2/Rtel1/Kat7/Suv39h1/Hnrnpu/Sin3a/Hnrnpa1/Lig4/Ep300/Trp53/Slx1b/Wdr61/Mapk15	41
GO	CC	GO:0035097	histone methyltransferase complex	24/2279	89/17165	0.000434007	0.0108502	ENSMUSG00000006307/ENSMUSG00000006920/ENSMUSG00000008373/ENSMUSG00000017548/ENSMUSG00000020063/ENSMUSG00000024067/ENSMUSG00000024193/ENSMUSG00000026439/ENSMUSG00000028345/ENSMUSG00000028397/ENSMUSG00000033943/ENSMUSG00000034379/ENSMUSG00000035529/ENSMUSG00000037570/ENSMUSG00000038056/ENSMUSG00000038518/ENSMUSG00000039117/ENSMUSG00000042207/ENSMUSG00000048154/ENSMUSG00000049739/ENSMUSG00000051316/…	Kmt2b/Ezh1/Prpf31/Suz12/Sirt1/Dpy30/Phf1/Rbbp5/Tex10/Kdm4c/Mga/Wdr5b/Prdm4/Mcrs1/Kmt2c/Jarid2/Taf4a/Kdm5b/Kmt2d/Zfp646/Taf7/Chd8/Las1l/Max	24
GO	BP	GO:0043488	regulation of mRNA stability	24/2267	85/17047	0.000209552	0.0111304	ENSMUSG00000007670/ENSMUSG00000010554/ENSMUSG00000020594/ENSMUSG00000021012/ENSMUSG00000023495/ENSMUSG00000026634/ENSMUSG00000027201/ENSMUSG00000028114/ENSMUSG00000028580/ENSMUSG00000028639/ENSMUSG00000028991/ENSMUSG00000031060/ENSMUSG00000034724/ENSMUSG00000036779/ENSMUSG00000039630/ENSMUSG00000041459/ENSMUSG00000042650/ENSMUSG00000043702/ENSMUSG00000045193/ENSMUSG00000047213/ENSMUSG00000048000/…	Khsrp/Mettl16/Pum2/Zc3h14/Pcbp4/Angel2/Myef2/Mettl14/Pum1/Ybx1/Mtor/Rbm10/Cnot6l/Papd5/Hnrnpu/Tardbp/Alkbh5/Pde12/Cirbp/Ythdf3/Gigyf2/Upf1/Hnrnpm/Hnrnpr	24
GO	BP	GO:0031124	mRNA 3'-end processing	18/2267	56/17047	0.000219873	0.0115674	ENSMUSG00000003435/ENSMUSG00000005609/ENSMUSG00000011960/ENSMUSG00000021012/ENSMUSG00000022556/ENSMUSG00000023118/ENSMUSG00000026361/ENSMUSG00000027079/ENSMUSG00000027893/ENSMUSG00000030816/ENSMUSG00000034820/ENSMUSG00000036779/ENSMUSG00000040720/ENSMUSG00000041328/ENSMUSG00000042487/ENSMUSG00000046201/ENSMUSG00000053536/ENSMUSG00000075600	Supt5/Ctr9/Ccnt1/Zc3h14/Hsf1/Sympk/Cdc73/Clp1/Ahcyl1/Rnf40/Cpsf7/Papd5/1110037F02Rik/Pcf11/Leo1/Scaf8/Cstf2t/Zc3h3	18
GO	BP	GO:2001251	negative regulation of chromosome organization	34/2267	138/17047	0.000223066	0.0116247	ENSMUSG00000002052/ENSMUSG00000007589/ENSMUSG00000010342/ENSMUSG00000016559/ENSMUSG00000017146/ENSMUSG00000017264/ENSMUSG00000017421/ENSMUSG00000020063/ENSMUSG00000022314/ENSMUSG00000024193/ENSMUSG00000024811/ENSMUSG00000025925/ENSMUSG00000026219/ENSMUSG00000027185/ENSMUSG00000028397/ENSMUSG00000029910/ENSMUSG00000030649/ENSMUSG00000031388/ENSMUSG00000034509/ENSMUSG00000036181/ENSMUSG00000036779/…	Supt6/Tinf2/Tex14/H3f3b/Brca1/Exosc10/Zfp207/Sirt1/Rad21/Phf1/Tnks2/Terf1/Trip12/Nat10/Kdm4c/Mad2l1/Anapc15/Naa10/Mad2l1bp/Hist1h1c/Papd5/Mcrs1/Phf2/Jarid2/Rtel1/Cdk5rap2/Hnrnpu/Wapal/Sin3a/Hnrnpa1/Taf7/Hist1h1e/Atad2b/Kdm3a	34
GO	BP	GO:0000289	nuclear-transcribed mRNA poly(A) tail shortening	2267-10-01	22/17047	0.000238236	0.0122992	ENSMUSG00000005682/ENSMUSG00000020362/ENSMUSG00000029647/ENSMUSG00000032498/ENSMUSG00000034724/ENSMUSG00000036550/ENSMUSG00000036698/ENSMUSG00000036779/ENSMUSG00000037573/ENSMUSG00000047888	Pan2/Cnot6/Pan3/Mlh1/Cnot6l/Cnot1/Ago2/Papd5/Tob1/Tnrc6b	10
GO	MF	GO:0001103	RNA polymerase II repressing transcription factor binding	13/2282	34/17092	0.000248468	0.0123712	ENSMUSG00000001280/ENSMUSG00000006464/ENSMUSG00000021013/ENSMUSG00000022383/ENSMUSG00000027274/ENSMUSG00000031755/ENSMUSG00000033543/ENSMUSG00000037325/ENSMUSG00000042557/ENSMUSG00000042570/ENSMUSG00000063145/ENSMUSG00000068290/ENSMUSG00000071646	Sp1/Bbs1/Ttc8/Ppara/Mkks/Bbs2/Gtf2a2/Bbs7/Sin3a/Mier2/Bbs5/Ddrgk1/Mta2	13
GO	MF	GO:0004532	exoribonuclease activity	2282-12-01	30/17092	0.000261328	0.0123712	ENSMUSG00000005682/ENSMUSG00000017264/ENSMUSG00000020362/ENSMUSG00000026634/ENSMUSG00000028688/ENSMUSG00000029647/ENSMUSG00000032410/ENSMUSG00000033166/ENSMUSG00000033423/ENSMUSG00000034724/ENSMUSG00000036550/ENSMUSG00000043702	Pan2/Exosc10/Cnot6/Angel2/Toe1/Pan3/Xrn1/Dis3/Eri3/Cnot6l/Cnot1/Pde12	12
GO	MF	GO:0004843	thiol-dependent ubiquitin-specific protease activity	23/2282	81/17092	0.000272649	0.0123712	ENSMUSG00000006676/ENSMUSG00000019850/ENSMUSG00000022710/ENSMUSG00000025437/ENSMUSG00000025616/ENSMUSG00000029640/ENSMUSG00000031201/ENSMUSG00000031826/ENSMUSG00000032376/ENSMUSG00000033364/ENSMUSG00000033909/ENSMUSG00000036990/ENSMUSG00000038495/ENSMUSG00000041161/ENSMUSG00000043415/ENSMUSG00000045210/ENSMUSG00000046404/ENSMUSG00000053483/ENSMUSG00000056342/ENSMUSG00000059263/ENSMUSG00000062627/…	Usp19/Tnfaip3/Usp7/Usp33/Usp16/Usp12/Brcc3/Usp10/Usp3/Usp37/Usp36/Otud4/Otud7b/Otud3/Otud1/Vcpip1/Yod1/Usp21/Usp34/Usp47/Mysm1/Usp31/Usp49	23
GO	MF	GO:0018024	histone-lysine N-methyltransferase activity	15/2282	43/17092	0.000277598	0.0123712	ENSMUSG00000006307/ENSMUSG00000006920/ENSMUSG00000015697/ENSMUSG00000017548/ENSMUSG00000026439/ENSMUSG00000026646/ENSMUSG00000029004/ENSMUSG00000036893/ENSMUSG00000038056/ENSMUSG00000039231/ENSMUSG00000044791/ENSMUSG00000045098/ENSMUSG00000048154/ENSMUSG00000051977/ENSMUSG00000059851	Kmt2b/Ezh1/Setdb1/Suz12/Rbbp5/Suv39h2/Kmt2e/Ehmt1/Kmt2c/Suv39h1/Setd2/Suv420h1/Kmt2d/Prdm9/Suv420h2	15
GO	MF	GO:0042826	histone deacetylase binding	30/2282	118/17092	0.000305855	0.0126434	ENSMUSG00000001280/ENSMUSG00000001415/ENSMUSG00000004698/ENSMUSG00000005583/ENSMUSG00000015149/ENSMUSG00000017485/ENSMUSG00000018362/ENSMUSG00000018501/ENSMUSG00000018678/ENSMUSG00000020038/ENSMUSG00000021270/ENSMUSG00000022141/ENSMUSG00000024045/ENSMUSG00000027905/ENSMUSG00000028820/ENSMUSG00000031393/ENSMUSG00000037622/ENSMUSG00000037992/ENSMUSG00000038151/ENSMUSG00000039512/ENSMUSG00000040712/…	Sp1/Smg5/Hdac9/Mef2c/Sirt2/Top2b/Kpna2/Ncor1/Sp2/Cry1/Hsp90aa1/Nipbl/Akap8/Ddx20/Sfpq/Mecp2/Wdtc1/Rara/Prdm1/Uhrf1bp1/Camta2/Mier2/Nrip1/Trp53/Hdac10/Suds3/Insm1/Mta2/Brms1/Hspa1a	30
GO	MF	GO:0042623	ATPase activity, coupled	66/2282	326/17092	0.000309893	0.0126434	ENSMUSG00000003660/ENSMUSG00000004668/ENSMUSG00000006057/ENSMUSG00000006567/ENSMUSG00000006599/ENSMUSG00000007646/ENSMUSG00000015971/ENSMUSG00000016018/ENSMUSG00000017485/ENSMUSG00000018707/ENSMUSG00000020079/ENSMUSG00000020719/ENSMUSG00000020752/ENSMUSG00000021240/ENSMUSG00000021635/ENSMUSG00000021832/ENSMUSG00000021983/ENSMUSG00000022420/ENSMUSG00000022471/ENSMUSG00000024030/ENSMUSG00000024151/…	Snrnp200/Abca13/Atp5g1/Atp7b/Gtf2h1/Rad51c/Actr8/Skiv2l2/Top2b/Dync1h1/Supv3l1/Ddx5/Recql5/Abcd4/Rad17/Psmc6/Atp8a2/Dnal4/Xrcc6/Abcg1/Msh2/Dync2li1/Ercc3/Dhx16/Kif20b/Katnal2/Yme1l1/Kif18a/Rad51/Chd1l/Abca4/Recql/Blm/Atp11a/Kifc3/Mre11a/Abcg4/Dhx30/Atp2c1/Polq/Dhx8/Wdr78/Helq/Fignl1/Abca7/Ddx11/Atp11b/Dhx38/Rtel1/Atp6v0e2/Ipo8/Atp1a3/Lonp1/Katnal1/Wdr60/Wdr63/Chtf8/Dync2h1/Chd8/Dnah9/Chd6/Upf1/Ra…	66
GO	MF	GO:0042171	lysophosphatidic acid acyltransferase activity	2282-07-01	12/17092	0.000320712	0.0126434	ENSMUSG00000001211/ENSMUSG00000026623/ENSMUSG00000031467/ENSMUSG00000033192/ENSMUSG00000037062/ENSMUSG00000041653/ENSMUSG00000054469	Agpat3/Lpgat1/Agpat5/Lpcat2/Sh3glb1/Pnpla3/Lclat1	7
GO	BP	GO:0000086	G2/M transition of mitotic cell cycle	29/2267	112/17047	0.00025608	0.0129779	ENSMUSG00000007646/ENSMUSG00000017146/ENSMUSG00000020381/ENSMUSG00000020413/ENSMUSG00000021255/ENSMUSG00000021635/ENSMUSG00000021932/ENSMUSG00000022314/ENSMUSG00000022960/ENSMUSG00000024590/ENSMUSG00000026605/ENSMUSG00000029022/ENSMUSG00000029283/ENSMUSG00000030528/ENSMUSG00000031393/ENSMUSG00000031878/ENSMUSG00000031928/ENSMUSG00000040021/ENSMUSG00000041560/ENSMUSG00000042557/ENSMUSG00000046010/…	Rad51c/Brca1/3010026O09Rik/Hus1/Esrrb/Rad17/Rnaseh2b/Rad21/Donson/Lmnb1/Cenpf/Miip/Cdc7/Blm/Mecp2/Nae1/Mre11a/Lats1/Gltscr2/Sin3a/Zfp830/Pbx1/Brsk2/Camk2d/Rad51b/Usp47/Taok2/Taok3/Fbxl12	29
GO	BP	GO:0009582	detection of abiotic stimulus	29/2267	112/17047	0.00025608	0.0129779	ENSMUSG00000020907/ENSMUSG00000021983/ENSMUSG00000023979/ENSMUSG00000023982/ENSMUSG00000024211/ENSMUSG00000024842/ENSMUSG00000026239/ENSMUSG00000027274/ENSMUSG00000029064/ENSMUSG00000029491/ENSMUSG00000029663/ENSMUSG00000030324/ENSMUSG00000030470/ENSMUSG00000031142/ENSMUSG00000031293/ENSMUSG00000031450/ENSMUSG00000031789/ENSMUSG00000032086/ENSMUSG00000034837/ENSMUSG00000035504/ENSMUSG00000037446/…	Rcvrn/Atp8a2/Guca1b/Guca1a/Grm8/Cabp4/Pde6d/Mkks/Gnb1/Pde6b/Gngt1/Rho/Csrp3/Cacna1f/Rs1/Grk1/Cngb1/Bace1/Gnat1/Reep6/Tulp1/Cep250/Whrn/Cacna2d4/Gucy2f/Ccdc66/Pkd1l3/Rgs9bp/Cxcl12	29
GO	BP	GO:0006913	nucleocytoplasmic transport	59/2267	284/17047	0.000283839	0.0141255	ENSMUSG00000001017/ENSMUSG00000002052/ENSMUSG00000002372/ENSMUSG00000002718/ENSMUSG00000003226/ENSMUSG00000008301/ENSMUSG00000015176/ENSMUSG00000018160/ENSMUSG00000018362/ENSMUSG00000018428/ENSMUSG00000020739/ENSMUSG00000020982/ENSMUSG00000021929/ENSMUSG00000022119/ENSMUSG00000022142/ENSMUSG00000022391/ENSMUSG00000022831/ENSMUSG00000024384/ENSMUSG00000024491/ENSMUSG00000024604/ENSMUSG00000026667/…	Chtop/Supt6/Ranbp3/Cse1l/Ranbp2/Phax/Nolc1/Med1/Kpna2/Akap1/Nup85/Nemf/Kpna3/Rbm26/Nup155/Rangap1/Hcls1/Iws1/Rbm27/Rbm22/Uhmk1/Tsc1/Ect2/Ahcyl1/Fam53b/Gas6/Tnpo2/Mbtps1/Anp32a/Ankrd54/Ctdspl2/Thoc5/Fam53c/Ythdc1/Prickle1/Aaas/Thoc2/Nup205/Nup133/Ipo8/Nup88/Pik3r1/Tardbp/Poldip3/Alkbh5/Setd2/Hnrnpa1/Nupl2/Nup160/Nup188/Nup107/Styx/Pom121/Arntl/Trp53/Strada/Gm14698/Rbm15b/Ranbp6	59
GO	BP	GO:0051169	nuclear transport	59/2267	284/17047	0.000283839	0.0141255	ENSMUSG00000001017/ENSMUSG00000002052/ENSMUSG00000002372/ENSMUSG00000002718/ENSMUSG00000003226/ENSMUSG00000008301/ENSMUSG00000015176/ENSMUSG00000018160/ENSMUSG00000018362/ENSMUSG00000018428/ENSMUSG00000020739/ENSMUSG00000020982/ENSMUSG00000021929/ENSMUSG00000022119/ENSMUSG00000022142/ENSMUSG00000022391/ENSMUSG00000022831/ENSMUSG00000024384/ENSMUSG00000024491/ENSMUSG00000024604/ENSMUSG00000026667/…	Chtop/Supt6/Ranbp3/Cse1l/Ranbp2/Phax/Nolc1/Med1/Kpna2/Akap1/Nup85/Nemf/Kpna3/Rbm26/Nup155/Rangap1/Hcls1/Iws1/Rbm27/Rbm22/Uhmk1/Tsc1/Ect2/Ahcyl1/Fam53b/Gas6/Tnpo2/Mbtps1/Anp32a/Ankrd54/Ctdspl2/Thoc5/Fam53c/Ythdc1/Prickle1/Aaas/Thoc2/Nup205/Nup133/Ipo8/Nup88/Pik3r1/Tardbp/Poldip3/Alkbh5/Setd2/Hnrnpa1/Nupl2/Nup160/Nup188/Nup107/Styx/Pom121/Arntl/Trp53/Strada/Gm14698/Rbm15b/Ranbp6	59
GO	BP	GO:0044839	cell cycle G2/M phase transition	32/2267	129/17047	0.000294963	0.0142586	ENSMUSG00000007646/ENSMUSG00000017146/ENSMUSG00000020381/ENSMUSG00000020413/ENSMUSG00000021255/ENSMUSG00000021635/ENSMUSG00000021932/ENSMUSG00000022314/ENSMUSG00000022960/ENSMUSG00000024045/ENSMUSG00000024590/ENSMUSG00000026605/ENSMUSG00000029022/ENSMUSG00000029283/ENSMUSG00000030528/ENSMUSG00000031201/ENSMUSG00000031393/ENSMUSG00000031878/ENSMUSG00000031928/ENSMUSG00000035234/ENSMUSG00000040021/…	Rad51c/Brca1/3010026O09Rik/Hus1/Esrrb/Rad17/Rnaseh2b/Rad21/Donson/Akap8/Lmnb1/Cenpf/Miip/Cdc7/Blm/Brcc3/Mecp2/Nae1/Mre11a/Fam175a/Lats1/Gltscr2/Sin3a/Zfp830/Pbx1/Brsk2/Camk2d/Rad51b/Usp47/Taok2/Taok3/Fbxl12	32
GO	BP	GO:0032392	DNA geometric change	19/2267	62/17047	0.000297918	0.0142586	ENSMUSG00000000028/ENSMUSG00000015971/ENSMUSG00000020079/ENSMUSG00000020752/ENSMUSG00000022471/ENSMUSG00000024382/ENSMUSG00000027323/ENSMUSG00000028089/ENSMUSG00000030243/ENSMUSG00000030528/ENSMUSG00000031546/ENSMUSG00000031928/ENSMUSG00000032480/ENSMUSG00000035266/ENSMUSG00000035842/ENSMUSG00000038685/ENSMUSG00000040429/ENSMUSG00000053754/ENSMUSG00000059552	Cdc45/Actr8/Supv3l1/Recql5/Xrcc6/Ercc3/Rad51/Chd1l/Recql/Blm/Gins4/Mre11a/Dhx30/Helq/Ddx11/Rtel1/Mterf1a/Chd8/Trp53	19
GO	BP	GO:0051298	centrosome duplication	19/2267	62/17047	0.000297918	0.0142586	ENSMUSG00000015095/ENSMUSG00000017146/ENSMUSG00000020212/ENSMUSG00000023066/ENSMUSG00000023345/ENSMUSG00000025437/ENSMUSG00000025758/ENSMUSG00000027959/ENSMUSG00000031347/ENSMUSG00000032534/ENSMUSG00000032782/ENSMUSG00000033904/ENSMUSG00000039298/ENSMUSG00000043065/ENSMUSG00000048799/ENSMUSG00000049488/ENSMUSG00000063810/ENSMUSG00000068394/ENSMUSG00000079553	Fbxw5/Brca1/Mdm1/Rttn/Poc1a/Usp33/Plk4/Sass6/Cetn2/Cep63/Cntrob/Ccp110/Cdk5rap2/Spice1/Cep120/Tmem67/Alms1/Cep152/Kifc1	19
GO	BP	GO:0098534	centriole assembly	14/2267	39/17047	0.000300648	0.0142586	ENSMUSG00000014859/ENSMUSG00000020212/ENSMUSG00000023066/ENSMUSG00000025758/ENSMUSG00000027959/ENSMUSG00000031347/ENSMUSG00000032534/ENSMUSG00000032782/ENSMUSG00000033904/ENSMUSG00000039298/ENSMUSG00000043065/ENSMUSG00000048799/ENSMUSG00000063810/ENSMUSG00000068394	E2f4/Mdm1/Rttn/Plk4/Sass6/Cetn2/Cep63/Cntrob/Ccp110/Cdk5rap2/Spice1/Cep120/Alms1/Cep152	14
GO	BP	GO:0009581	detection of external stimulus	29/2267	113/17047	0.000301401	0.0142586	ENSMUSG00000020907/ENSMUSG00000021983/ENSMUSG00000023979/ENSMUSG00000023982/ENSMUSG00000024211/ENSMUSG00000024842/ENSMUSG00000026239/ENSMUSG00000027274/ENSMUSG00000029064/ENSMUSG00000029491/ENSMUSG00000029663/ENSMUSG00000030324/ENSMUSG00000030470/ENSMUSG00000031142/ENSMUSG00000031293/ENSMUSG00000031450/ENSMUSG00000031789/ENSMUSG00000032086/ENSMUSG00000034837/ENSMUSG00000035504/ENSMUSG00000037446/…	Rcvrn/Atp8a2/Guca1b/Guca1a/Grm8/Cabp4/Pde6d/Mkks/Gnb1/Pde6b/Gngt1/Rho/Csrp3/Cacna1f/Rs1/Grk1/Cngb1/Bace1/Gnat1/Reep6/Tulp1/Cep250/Whrn/Cacna2d4/Gucy2f/Ccdc66/Pkd1l3/Rgs9bp/Cxcl12	29
GO	BP	GO:0006406	mRNA export from nucleus	16/2267	48/17047	0.000304582	0.0142586	ENSMUSG00000001017/ENSMUSG00000002052/ENSMUSG00000020739/ENSMUSG00000022142/ENSMUSG00000024384/ENSMUSG00000034274/ENSMUSG00000035851/ENSMUSG00000037475/ENSMUSG00000039509/ENSMUSG00000040667/ENSMUSG00000041815/ENSMUSG00000042650/ENSMUSG00000044791/ENSMUSG00000051329/ENSMUSG00000052798/ENSMUSG00000074102	Chtop/Supt6/Nup85/Nup155/Iws1/Thoc5/Ythdc1/Thoc2/Nup133/Nup88/Poldip3/Alkbh5/Setd2/Nup160/Nup107/Rbm15b	16
GO	BP	GO:0071427	mRNA-containing ribonucleoprotein complex export from nucleus	16/2267	48/17047	0.000304582	0.0142586	ENSMUSG00000001017/ENSMUSG00000002052/ENSMUSG00000020739/ENSMUSG00000022142/ENSMUSG00000024384/ENSMUSG00000034274/ENSMUSG00000035851/ENSMUSG00000037475/ENSMUSG00000039509/ENSMUSG00000040667/ENSMUSG00000041815/ENSMUSG00000042650/ENSMUSG00000044791/ENSMUSG00000051329/ENSMUSG00000052798/ENSMUSG00000074102	Chtop/Supt6/Nup85/Nup155/Iws1/Thoc5/Ythdc1/Thoc2/Nup133/Nup88/Poldip3/Alkbh5/Setd2/Nup160/Nup107/Rbm15b	16
GO	CC	GO:0071014	post-mRNA release spliceosomal complex	2279-07-01	13/17165	0.000593807	0.0143503	ENSMUSG00000001767/ENSMUSG00000003660/ENSMUSG00000025200/ENSMUSG00000027201/ENSMUSG00000029345/ENSMUSG00000035125/ENSMUSG00000059208	Crnkl1/Snrnp200/Cwf19l1/Myef2/Tfip11/Gcfc2/Hnrnpm	7
GO	BP	GO:1901987	regulation of cell cycle phase transition	57/2267	273/17047	0.000311901	0.0144785	ENSMUSG00000000028/ENSMUSG00000004364/ENSMUSG00000007646/ENSMUSG00000010342/ENSMUSG00000015133/ENSMUSG00000017146/ENSMUSG00000017421/ENSMUSG00000020381/ENSMUSG00000020413/ENSMUSG00000020546/ENSMUSG00000021635/ENSMUSG00000021932/ENSMUSG00000022018/ENSMUSG00000022314/ENSMUSG00000022855/ENSMUSG00000022960/ENSMUSG00000024382/ENSMUSG00000024590/ENSMUSG00000024740/ENSMUSG00000024922/ENSMUSG00000025925/…	Cdc45/Cul3/Rad51c/Tex14/Lrrk1/Brca1/Zfp207/3010026O09Rik/Hus1/Stxbp4/Rad17/Rnaseh2b/Rgcc/Rad21/Senp2/Donson/Ercc3/Lmnb1/Ddb1/Ovol1/Terf1/Cdc73/Cenpf/Rpa2/Kmt2e/Miip/Cdc7/Casp2/Mad2l1/Blm/Anapc15/Brcc3/Mecp2/Cul4a/Rbl2/Nae1/Mre11a/Rfwd3/Mad2l1bp/Fam175a/Cdk5rap2/Gltscr2/Sin3a/Cirbp/Zfp830/Gigyf2/Dcun1d3/Pbx1/Camk2d/Ankrd17/Rad51b/Usp47/Trp53/Taok2/Taok3/Mapk15/2610528A11Rik	57
GO	MF	GO:0000175	3'-5'-exoribonuclease activity	2282-11-01	27/17092	0.000389975	0.0148046	ENSMUSG00000005682/ENSMUSG00000017264/ENSMUSG00000020362/ENSMUSG00000026634/ENSMUSG00000028688/ENSMUSG00000029647/ENSMUSG00000033166/ENSMUSG00000033423/ENSMUSG00000034724/ENSMUSG00000036550/ENSMUSG00000043702	Pan2/Exosc10/Cnot6/Angel2/Toe1/Pan3/Dis3/Eri3/Cnot6l/Cnot1/Pde12	11
GO	CC	GO:0000775	chromosome, centromeric region	40/2279	180/17165	0.000636527	0.0148865	ENSMUSG00000002748/ENSMUSG00000005233/ENSMUSG00000010342/ENSMUSG00000017421/ENSMUSG00000020107/ENSMUSG00000020492/ENSMUSG00000020628/ENSMUSG00000020661/ENSMUSG00000020739/ENSMUSG00000022314/ENSMUSG00000022391/ENSMUSG00000022556/ENSMUSG00000024660/ENSMUSG00000024974/ENSMUSG00000025862/ENSMUSG00000026605/ENSMUSG00000026708/ENSMUSG00000027115/ENSMUSG00000027331/ENSMUSG00000027496/ENSMUSG00000028397/…	Baz1b/Spc25/Tex14/Zfp207/Anapc16/Ska2/Trappc12/Dnmt3a/Nup85/Rad21/Rangap1/Hsf1/Incenp/Smc3/Stag2/Cenpf/Cenpl/Kif18a/Knstrn/Aurka/Kdm4c/Cenpa/Mad2l1/Dctn6/Cenpn/Ncapd3/Stag3/Phf2/Suv39h1/Nup133/Hnrnpu/Mis12/Sin3a/Trp53bp1/Bod1/Suv420h1/Nup160/Nup107/Suv420h2/Clasp1	40
GO	CC	GO:0072686	mitotic spindle	26/2279	102/17165	0.000658248	0.0149134	ENSMUSG00000004221/ENSMUSG00000015149/ENSMUSG00000018501/ENSMUSG00000018651/ENSMUSG00000022391/ENSMUSG00000022556/ENSMUSG00000024301/ENSMUSG00000024795/ENSMUSG00000024974/ENSMUSG00000025862/ENSMUSG00000027115/ENSMUSG00000027331/ENSMUSG00000027496/ENSMUSG00000027699/ENSMUSG00000027883/ENSMUSG00000029166/ENSMUSG00000029283/ENSMUSG00000029910/ENSMUSG00000036678/ENSMUSG00000039298/ENSMUSG00000039630/…	Ikbkg/Sirt2/Ncor1/Tada2a/Rangap1/Hsf1/Kifc5b/Kif20b/Smc3/Stag2/Kif18a/Knstrn/Aurka/Ect2/Gpsm2/Mapre3/Cdc7/Mad2l1/Aaas/Cdk5rap2/Hnrnpu/Ckap2l/Map10/Eml1/Eml3/Kifc1	26
GO	BP	GO:1902750	negative regulation of cell cycle G2/M phase transition	17/2267	53/17047	0.000335509	0.0153238	ENSMUSG00000017146/ENSMUSG00000020381/ENSMUSG00000020413/ENSMUSG00000021635/ENSMUSG00000022314/ENSMUSG00000022960/ENSMUSG00000029022/ENSMUSG00000030528/ENSMUSG00000031201/ENSMUSG00000031878/ENSMUSG00000031928/ENSMUSG00000035234/ENSMUSG00000041560/ENSMUSG00000046010/ENSMUSG00000059263/ENSMUSG00000059981/ENSMUSG00000061288	Brca1/3010026O09Rik/Hus1/Rad17/Rad21/Donson/Miip/Blm/Brcc3/Nae1/Mre11a/Fam175a/Gltscr2/Zfp830/Usp47/Taok2/Taok3	17
GO	BP	GO:0009048	dosage compensation by inactivation of X chromosome	2267-09-01	19/17047	0.000335659	0.0153238	ENSMUSG00000017146/ENSMUSG00000017264/ENSMUSG00000022160/ENSMUSG00000024054/ENSMUSG00000035851/ENSMUSG00000039630/ENSMUSG00000048109/ENSMUSG00000058301/ENSMUSG00000074102	Brca1/Exosc10/Mettl3/Smchd1/Ythdc1/Hnrnpu/Rbm15/Upf1/Rbm15b	9
GO	CC	GO:0005643	nuclear pore	19/2279	66/17165	0.000697992	0.0153347	ENSMUSG00000002372/ENSMUSG00000003226/ENSMUSG00000004880/ENSMUSG00000015023/ENSMUSG00000020739/ENSMUSG00000022142/ENSMUSG00000022391/ENSMUSG00000022855/ENSMUSG00000029910/ENSMUSG00000031347/ENSMUSG00000036678/ENSMUSG00000037933/ENSMUSG00000038759/ENSMUSG00000039509/ENSMUSG00000040667/ENSMUSG00000051329/ENSMUSG00000052533/ENSMUSG00000052798/ENSMUSG00000053293	Ranbp3/Ranbp2/Lbr/Ddx19a/Nup85/Nup155/Rangap1/Senp2/Mad2l1/Cetn2/Aaas/Bicd2/Nup205/Nup133/Nup88/Nup160/Nup188/Nup107/Pom121	19
GO	BP	GO:0010948	negative regulation of cell cycle process	46/2267	209/17047	0.00034086	0.0154337	ENSMUSG00000010342/ENSMUSG00000015133/ENSMUSG00000017146/ENSMUSG00000017421/ENSMUSG00000020212/ENSMUSG00000020381/ENSMUSG00000020413/ENSMUSG00000021258/ENSMUSG00000021635/ENSMUSG00000022018/ENSMUSG00000022248/ENSMUSG00000022314/ENSMUSG00000022960/ENSMUSG00000024922/ENSMUSG00000024974/ENSMUSG00000025862/ENSMUSG00000025925/ENSMUSG00000026361/ENSMUSG00000028884/ENSMUSG00000029022/ENSMUSG00000029863/…	Tex14/Lrrk1/Brca1/Zfp207/Mdm1/3010026O09Rik/Hus1/Ccnk/Rad17/Rgcc/Rad1/Rad21/Donson/Ovol1/Smc3/Stag2/Terf1/Cdc73/Rpa2/Miip/Casp2/Mad2l1/Blm/Anapc15/Brcc3/Naa10/Rbl2/Nae1/Mre11a/Rfwd3/Mad2l1bp/Fam175a/Cdk5rap2/Wapal/Gltscr2/Zfp830/Gigyf2/Dcun1d3/Tmem67/Mdm4/Usp47/Trp53/Taok2/Taok3/Kifc1/2610528A11Rik	46
GO	BP	GO:0010639	negative regulation of organelle organization	75/2267	384/17047	0.000349611	0.0157012	ENSMUSG00000002052/ENSMUSG00000002486/ENSMUSG00000005871/ENSMUSG00000006127/ENSMUSG00000007589/ENSMUSG00000008035/ENSMUSG00000010342/ENSMUSG00000015133/ENSMUSG00000015222/ENSMUSG00000015766/ENSMUSG00000016319/ENSMUSG00000016559/ENSMUSG00000017146/ENSMUSG00000017264/ENSMUSG00000017421/ENSMUSG00000020063/ENSMUSG00000020181/ENSMUSG00000020212/ENSMUSG00000022018/ENSMUSG00000022248/ENSMUSG00000022314/…	Supt6/Tchp/Apc/Inpp5k/Tinf2/Mid1ip1/Tex14/Lrrk1/Map2/Eps8/Slc25a5/H3f3b/Brca1/Exosc10/Zfp207/Sirt1/Nav3/Mdm1/Rgcc/Rad1/Rad21/Lima1/Phf1/Tnks2/Coro1b/Add3/Rp1/Terf1/Trip12/Camsap1/Nat10/Mkks/Spef1/Odf2l/Kdm4c/Add1/Ppargc1a/Sirt4/Mad2l1/Anapc15/Naa10/Dlc1/Kank1/Ppp1r9a/Ccp110/Fhod3/Mad2l1bp/Ankrd27/Fnip1/Hist1h1c/Papd5/Ppfia1/Mcrs1/Phf2/9630033F20Rik/Jarid2/Rtel1/Cdk5rap2/Hnrnpu/Wapal/Capza3/Sin3a/…	75
GO	MF	GO:0016887	ATPase activity	79/2282	410/17092	0.000431243	0.0157866	ENSMUSG00000003234/ENSMUSG00000003660/ENSMUSG00000004668/ENSMUSG00000006057/ENSMUSG00000006567/ENSMUSG00000006599/ENSMUSG00000007646/ENSMUSG00000015971/ENSMUSG00000016018/ENSMUSG00000017485/ENSMUSG00000018707/ENSMUSG00000020079/ENSMUSG00000020719/ENSMUSG00000020752/ENSMUSG00000021240/ENSMUSG00000021270/ENSMUSG00000021635/ENSMUSG00000021693/ENSMUSG00000021832/ENSMUSG00000021983/ENSMUSG00000022420/…	Abcf3/Snrnp200/Abca13/Atp5g1/Atp7b/Gtf2h1/Rad51c/Actr8/Skiv2l2/Top2b/Dync1h1/Supv3l1/Ddx5/Recql5/Abcd4/Hsp90aa1/Rad17/Kif2a/Psmc6/Atp8a2/Dnal4/Xrcc6/Abcg1/Smchd1/Msh2/Dync2li1/Kifc5b/Ercc3/Dhx16/Kif20b/Katnal2/Yme1l1/Kif18a/Rad51/Kif3b/Chd1l/Abca4/Atf7ip/Recql/Blm/Atp11a/Kifc3/Mre11a/Abcg4/Dhx30/Mlh1/Atp2c1/Polq/Dhx8/Wdr78/Helq/Fignl1/Abca7/Ddx11/Atp13a2/Kif15/Atp11b/Dhx38/Rtel1/Atp6v0e2/Ipo8/Atp…	79
GO	BP	GO:0044818	mitotic G2/M transition checkpoint	2267-12-01	31/17047	0.0003612	0.0160909	ENSMUSG00000017146/ENSMUSG00000020381/ENSMUSG00000020413/ENSMUSG00000021635/ENSMUSG00000022960/ENSMUSG00000030528/ENSMUSG00000031878/ENSMUSG00000031928/ENSMUSG00000041560/ENSMUSG00000046010/ENSMUSG00000059981/ENSMUSG00000061288	Brca1/3010026O09Rik/Hus1/Rad17/Donson/Blm/Nae1/Mre11a/Gltscr2/Zfp830/Taok2/Taok3	12
GO	BP	GO:0044774	mitotic DNA integrity checkpoint	19/2267	63/17047	0.000374044	0.0164167	ENSMUSG00000017485/ENSMUSG00000020381/ENSMUSG00000020413/ENSMUSG00000021635/ENSMUSG00000022960/ENSMUSG00000024151/ENSMUSG00000028884/ENSMUSG00000029863/ENSMUSG00000030528/ENSMUSG00000031878/ENSMUSG00000031928/ENSMUSG00000033596/ENSMUSG00000038569/ENSMUSG00000041560/ENSMUSG00000046010/ENSMUSG00000048000/ENSMUSG00000059552/ENSMUSG00000059981/ENSMUSG00000061288	Top2b/3010026O09Rik/Hus1/Rad17/Donson/Msh2/Rpa2/Casp2/Blm/Nae1/Mre11a/Rfwd3/Rad9b/Gltscr2/Zfp830/Gigyf2/Trp53/Taok2/Taok3	19
GO	BP	GO:0022613	ribonucleoprotein complex biogenesis	80/2267	416/17047	0.000374458	0.0164167	ENSMUSG00000000167/ENSMUSG00000000355/ENSMUSG00000001767/ENSMUSG00000003660/ENSMUSG00000004393/ENSMUSG00000005682/ENSMUSG00000008373/ENSMUSG00000010554/ENSMUSG00000014907/ENSMUSG00000015748/ENSMUSG00000016018/ENSMUSG00000017264/ENSMUSG00000018379/ENSMUSG00000018433/ENSMUSG00000018707/ENSMUSG00000018974/ENSMUSG00000020063/ENSMUSG00000020362/ENSMUSG00000020594/ENSMUSG00000020832/ENSMUSG00000020850/…	Pih1d2/Mcts1/Crnkl1/Snrnp200/Ddx56/Pan2/Prpf31/Mettl16/Naf1/Prpf3/Skiv2l2/Exosc10/Srsf1/Nol11/Dync1h1/Sart3/Sirt1/Cnot6/Pum2/Eral1/Prpf8/Gtpbp4/Hsp90aa1/Rpp40/Mterfd1/Rrn3/Tarbp2/Imp4/Cdc73/Ddx31/Tsc1/Clp1/Nat10/Nop56/Exosc8/Ddx20/2810403A07Rik/Ago3/Gnl2/Sfswap/Pan3/Ddx47/Rbmx/Cul4a/Nip7/Ddx6/Dhx30/Ybey/Dis3/Scaf11/Eri3/Usp36/Cnot6l/Cpsf7/Gcfc2/Shq1/Utp6/Mrps2/Ythdc1/Surf6/Cnot1/Ago2/Suv39h1/Exos…	80
GO	CC	GO:0000790	nuclear chromatin	71/2279	370/17165	0.000789785	0.0165538	ENSMUSG00000000552/ENSMUSG00000001280/ENSMUSG00000002835/ENSMUSG00000003778/ENSMUSG00000005583/ENSMUSG00000008976/ENSMUSG00000014859/ENSMUSG00000015149/ENSMUSG00000015846/ENSMUSG00000015971/ENSMUSG00000016559/ENSMUSG00000017548/ENSMUSG00000018501/ENSMUSG00000020063/ENSMUSG00000020647/ENSMUSG00000020661/ENSMUSG00000021221/ENSMUSG00000021635/ENSMUSG00000022141/ENSMUSG00000024045/ENSMUSG00000024170/…	Zfp385a/Sp1/Chaf1a/Brd8/Mef2c/Gabpa/E2f4/Sirt2/Rxra/Actr8/H3f3b/Suz12/Ncor1/Sirt1/Ncoa1/Dnmt3a/Dpf3/Rad17/Nipbl/Akap8/Telo2/Uhrf2/Taf5/Rad51/Tti1/Polr3gl/Kdm4c/Nasp/Ppargc1a/Cenpa/Clock/Trim24/Rad51ap1/Aldoa/Rbmx/Mecp2/Mre11a/Usp3/Ccar2/Hmgxb4/Ttc21b/Ncapd3/Ddx11/Hist1h1c/Gltscr1l/Mcrs1/Rara/Trps1/Kat7/Taf4a/Suv39h1/H2afv/Cdk13/Sin3a/Nrip1/Hist1h1e/Cbx7/Srcap/Hmgb2/Brd9/Max/Trp53/Suv420h2/Hist1h4…	71
GO	CC	GO:0015030	Cajal body	16/2279	52/17165	0.000817312	0.0165538	ENSMUSG00000008301/ENSMUSG00000008373/ENSMUSG00000010362/ENSMUSG00000015176/ENSMUSG00000015748/ENSMUSG00000018974/ENSMUSG00000020705/ENSMUSG00000020929/ENSMUSG00000021890/ENSMUSG00000021972/ENSMUSG00000025234/ENSMUSG00000026634/ENSMUSG00000028688/ENSMUSG00000033054/ENSMUSG00000041346/ENSMUSG00000066148	Phax/Prpf31/Rdm1/Nolc1/Prpf3/Sart3/Ddx42/Eftud2/Eaf1/Hmbox1/Arih1/Angel2/Toe1/Npat/Wrap53/Prpf4	16
GO	CC	GO:0030992	intraciliary transport particle B	2279-09-01	21/17165	0.00082198	0.0165538	ENSMUSG00000022621/ENSMUSG00000027778/ENSMUSG00000028576/ENSMUSG00000029469/ENSMUSG00000034292/ENSMUSG00000038564/ENSMUSG00000043621/ENSMUSG00000075271/ENSMUSG00000075273	Rabl2/Ift80/Ift74/Ift81/Traf3ip1/Ift172/Ubxn10/Ttc30a1/Ttc30b	9
GO	CC	GO:0000151	ubiquitin ligase complex	54/2279	266/17165	0.000854972	0.0167528	ENSMUSG00000002679/ENSMUSG00000004221/ENSMUSG00000004364/ENSMUSG00000014164/ENSMUSG00000015095/ENSMUSG00000017146/ENSMUSG00000017210/ENSMUSG00000018160/ENSMUSG00000020107/ENSMUSG00000021694/ENSMUSG00000022124/ENSMUSG00000023977/ENSMUSG00000024740/ENSMUSG00000025217/ENSMUSG00000025234/ENSMUSG00000025609/ENSMUSG00000026455/ENSMUSG00000026571/ENSMUSG00000026739/ENSMUSG00000027598/ENSMUSG00000028630/…	Med6/Ikbkg/Cul3/Klhl3/Fbxw5/Brca1/Med24/Med1/Anapc16/Ercc8/Fbxl3/Ubr2/Ddb1/Btrc/Arih1/Mkln1/Klhl12/Dcaf6/Bmi1/Itch/Dyrk2/Ube4b/Glmn/Cdk8/Kbtbd8/Det1/Anapc15/Fbxl19/Rnf40/Brcc3/Cul4a/Cul5/Zswim5/Zyg11b/Dcaf10/Zswim4/Topors/Siah1a/Anapc10/Fbxl5/Phc1/Dcaf17/Ubr3/Dcun1d3/Gan/Traf7/Cbx7/Klhl25/Spop/Usp47/Arih2/Fbxl12/Klhl9/Hspa1a	54
GO	BP	GO:0006282	regulation of DNA repair	29/2267	115/17047	0.000413839	0.0180004	ENSMUSG00000010154/ENSMUSG00000017146/ENSMUSG00000017485/ENSMUSG00000020063/ENSMUSG00000020381/ENSMUSG00000020752/ENSMUSG00000021694/ENSMUSG00000022556/ENSMUSG00000024054/ENSMUSG00000026219/ENSMUSG00000027323/ENSMUSG00000028884/ENSMUSG00000028886/ENSMUSG00000030346/ENSMUSG00000030528/ENSMUSG00000031201/ENSMUSG00000031446/ENSMUSG00000034206/ENSMUSG00000035234/ENSMUSG00000035455/ENSMUSG00000035842/…	Spire2/Brca1/Top2b/Sirt1/3010026O09Rik/Recql5/Ercc8/Hsf1/Smchd1/Trip12/Rad51/Rpa2/Eya3/Rad51ap1/Blm/Brcc3/Cul4a/Polq/Fam175a/Fignl1/Ddx11/9630033F20Rik/Rtel1/Suv39h1/Wrap53/Trp53bp1/Setd2/Rnf169/Hdac10	29
GO	CC	GO:0071013	catalytic step 2 spliceosome	22/2279	83/17165	0.000949739	0.01812	ENSMUSG00000001767/ENSMUSG00000003360/ENSMUSG00000003660/ENSMUSG00000016018/ENSMUSG00000018379/ENSMUSG00000020719/ENSMUSG00000020850/ENSMUSG00000020929/ENSMUSG00000024604/ENSMUSG00000027014/ENSMUSG00000028809/ENSMUSG00000029345/ENSMUSG00000029427/ENSMUSG00000031134/ENSMUSG00000034931/ENSMUSG00000037993/ENSMUSG00000039630/ENSMUSG00000040383/ENSMUSG00000042079/ENSMUSG00000046434/ENSMUSG00000059208/…	Crnkl1/Ddx23/Snrnp200/Skiv2l2/Srsf1/Ddx5/Prpf8/Eftud2/Rbm22/Cwc22/Srrm1/Tfip11/Zcchc8/Rbmx/Dhx8/Dhx38/Hnrnpu/Aqr/Hnrnpf/Hnrnpa1/Hnrnpm/Hnrnpr	22
GO	MF	GO:0042393	histone binding	41/2282	183/17092	0.000516014	0.0182384	ENSMUSG00000002052/ENSMUSG00000002748/ENSMUSG00000006920/ENSMUSG00000008958/ENSMUSG00000017548/ENSMUSG00000018974/ENSMUSG00000020063/ENSMUSG00000020519/ENSMUSG00000021221/ENSMUSG00000023852/ENSMUSG00000024193/ENSMUSG00000024817/ENSMUSG00000025616/ENSMUSG00000026283/ENSMUSG00000026439/ENSMUSG00000026918/ENSMUSG00000028496/ENSMUSG00000028693/ENSMUSG00000029004/ENSMUSG00000029833/ENSMUSG00000032249/…	Supt6/Baz1b/Ezh1/Vps72/Suz12/Sart3/Sirt1/Sap30l/Dpf3/Chd1/Phf1/Uhrf2/Usp16/Ing5/Rbbp5/Brd3/Mllt3/Nasp/Kmt2e/Trim24/Anp32a/Usp3/Wdr5b/Ncapd3/Wdtc1/2700029M09Rik/Phf2/Kat7/Zmynd8/Wrap53/Kdm5b/Trp53bp1/Kmt2d/Taf7/Atad2b/Cbx7/Chd8/Srcap/Brd9/Mysm1/Usp49	41
GO	BP	GO:0060249	anatomical structure homeostasis	73/2267	374/17047	0.00042427	0.0183099	ENSMUSG00000001415/ENSMUSG00000002204/ENSMUSG00000002948/ENSMUSG00000003068/ENSMUSG00000006464/ENSMUSG00000007589/ENSMUSG00000007646/ENSMUSG00000014426/ENSMUSG00000014907/ENSMUSG00000015133/ENSMUSG00000017264/ENSMUSG00000019699/ENSMUSG00000019952/ENSMUSG00000019971/ENSMUSG00000020007/ENSMUSG00000020212/ENSMUSG00000020413/ENSMUSG00000021255/ENSMUSG00000021270/ENSMUSG00000021396/ENSMUSG00000021803/…	Smg5/Napsa/Map2k7/Stk11/Bbs1/Tinf2/Rad51c/Map3k4/Naf1/Lrrk1/Exosc10/Akt3/Poc1b/Cep290/Il20ra/Mdm1/Hus1/Esrrb/Hsp90aa1/Nxnl2/Cdhr1/Hmbox1/Cct5/Xrcc6/Tfrc/Telo2/Tnks2/Rp1/Terf1/Ush2a/Nat10/Mkks/Rad51/Abca4/Rpa2/Zbtb48/Prom1/Add1/Mapkapk5/Kras/Rho/Blm/Aldoa/Tub/Bbs2/Cngb1/Mre11a/Ppargc1b/Mks1/Nxnl1/Papd5/Tulp1/Mcrs1/Trp53inp2/Rtel1/Whrn/Hnrnpu/Crocc/Wrap53/Dmd/Adrb2/Zfp830/Rp1l1/Hnrnpa1/Ccdc66/Gigyf…	73
GO	BP	GO:0032508	DNA duplex unwinding	17/2267	54/17047	0.000429698	0.0184004	ENSMUSG00000000028/ENSMUSG00000015971/ENSMUSG00000020079/ENSMUSG00000020752/ENSMUSG00000022471/ENSMUSG00000024382/ENSMUSG00000027323/ENSMUSG00000028089/ENSMUSG00000030243/ENSMUSG00000030528/ENSMUSG00000031546/ENSMUSG00000031928/ENSMUSG00000032480/ENSMUSG00000035266/ENSMUSG00000035842/ENSMUSG00000038685/ENSMUSG00000053754	Cdc45/Actr8/Supv3l1/Recql5/Xrcc6/Ercc3/Rad51/Chd1l/Recql/Blm/Gins4/Mre11a/Dhx30/Helq/Ddx11/Rtel1/Chd8	17
GO	BP	GO:0007099	centriole replication	13/2267	36/17047	0.0004595	0.0193833	ENSMUSG00000020212/ENSMUSG00000023066/ENSMUSG00000025758/ENSMUSG00000027959/ENSMUSG00000031347/ENSMUSG00000032534/ENSMUSG00000032782/ENSMUSG00000033904/ENSMUSG00000039298/ENSMUSG00000043065/ENSMUSG00000048799/ENSMUSG00000063810/ENSMUSG00000068394	Mdm1/Rttn/Plk4/Sass6/Cetn2/Cep63/Cntrob/Ccp110/Cdk5rap2/Spice1/Cep120/Alms1/Cep152	13
GO	BP	GO:0080182	histone H3-K4 trimethylation	2267-08-01	16/17047	0.000459669	0.0193833	ENSMUSG00000005609/ENSMUSG00000006307/ENSMUSG00000029004/ENSMUSG00000034832/ENSMUSG00000036181/ENSMUSG00000040943/ENSMUSG00000051627/ENSMUSG00000061559	Ctr9/Kmt2b/Kmt2e/Tet3/Hist1h1c/Tet2/Hist1h1e/Wdr61	8
GO	CC	GO:0000779	condensed chromosome, centromeric region	26/2279	105/17165	0.0010485	0.0194914	ENSMUSG00000005233/ENSMUSG00000010342/ENSMUSG00000017421/ENSMUSG00000020107/ENSMUSG00000020492/ENSMUSG00000020739/ENSMUSG00000022391/ENSMUSG00000022556/ENSMUSG00000024660/ENSMUSG00000026605/ENSMUSG00000027331/ENSMUSG00000027496/ENSMUSG00000029177/ENSMUSG00000029910/ENSMUSG00000031516/ENSMUSG00000031756/ENSMUSG00000035024/ENSMUSG00000038025/ENSMUSG00000039509/ENSMUSG00000039630/ENSMUSG00000040599/…	Spc25/Tex14/Zfp207/Anapc16/Ska2/Nup85/Rangap1/Hsf1/Incenp/Cenpf/Knstrn/Aurka/Cenpa/Mad2l1/Dctn6/Cenpn/Ncapd3/Phf2/Nup133/Hnrnpu/Mis12/Trp53bp1/Bod1/Suv420h1/Nup107/Suv420h2	26
GO	BP	GO:0000380	alternative mRNA splicing, via spliceosome	21/2267	74/17047	0.000472673	0.0196383	ENSMUSG00000015165/ENSMUSG00000018379/ENSMUSG00000018974/ENSMUSG00000020719/ENSMUSG00000021134/ENSMUSG00000022139/ENSMUSG00000024097/ENSMUSG00000028820/ENSMUSG00000029439/ENSMUSG00000031060/ENSMUSG00000031134/ENSMUSG00000039630/ENSMUSG00000040728/ENSMUSG00000041297/ENSMUSG00000042396/ENSMUSG00000046434/ENSMUSG00000048109/ENSMUSG00000055065/ENSMUSG00000059208/ENSMUSG00000060475/ENSMUSG00000074102	Hnrnpl/Srsf1/Sart3/Ddx5/Srsf5/Mbnl2/Srsf7/Sfpq/Sfswap/Rbm10/Rbmx/Hnrnpu/Esrp1/Cdk13/Rbm7/Hnrnpa1/Rbm15/Ddx17/Hnrnpm/Wtap/Rbm15b	21
GO	BP	GO:0035082	axoneme assembly	20/2267	69/17047	0.000472826	0.0196383	ENSMUSG00000003354/ENSMUSG00000020878/ENSMUSG00000020930/ENSMUSG00000025857/ENSMUSG00000025900/ENSMUSG00000028294/ENSMUSG00000030276/ENSMUSG00000031755/ENSMUSG00000031831/ENSMUSG00000035578/ENSMUSG00000035614/ENSMUSG00000038122/ENSMUSG00000039632/ENSMUSG00000039765/ENSMUSG00000040220/ENSMUSG00000042523/ENSMUSG00000043020/ENSMUSG00000046049/ENSMUSG00000056215/ENSMUSG00000072663	Ccdc65/Lrrc46/Ccdc103/Heatr2/Rp1/1700003M02Rik/Ttll3/Bbs2/Dnaaf1/Iqcg/Fam179b/Tbc1d32/Ccdc151/Cc2d2a/Gas8/Dnal1/Wdr63/Rp1l1/Lrguk/Spef2	20
GO	MF	GO:0004535	poly(A)-specific ribonuclease activity	2282-07-01	13/17092	0.000614779	0.0210049	ENSMUSG00000005682/ENSMUSG00000020362/ENSMUSG00000028688/ENSMUSG00000029647/ENSMUSG00000034724/ENSMUSG00000036550/ENSMUSG00000043702	Pan2/Cnot6/Toe1/Pan3/Cnot6l/Cnot1/Pde12	7
GO	BP	GO:0007051	spindle organization	37/2267	161/17047	0.000526792	0.0217164	ENSMUSG00000005233/ENSMUSG00000017421/ENSMUSG00000018501/ENSMUSG00000018707/ENSMUSG00000021693/ENSMUSG00000022770/ENSMUSG00000023345/ENSMUSG00000024277/ENSMUSG00000024301/ENSMUSG00000024974/ENSMUSG00000025862/ENSMUSG00000027331/ENSMUSG00000027475/ENSMUSG00000027496/ENSMUSG00000027883/ENSMUSG00000029166/ENSMUSG00000031393/ENSMUSG00000031516/ENSMUSG00000032498/ENSMUSG00000032534/ENSMUSG00000033949/…	Spc25/Zfp207/Ncor1/Dync1h1/Kif2a/Dlg1/Poc1a/Mapre2/Kifc5b/Smc3/Stag2/Knstrn/Kif3b/Aurka/Gpsm2/Mapre3/Mecp2/Dctn6/Mlh1/Cep63/Trim36/Aaas/Tacc3/Haus6/Pde4dip/Hnrnpu/Asun/Haus1/Spice1/Cep120/Map10/Eml1/Mapk15/Clasp1/Psrc1/Kifc1/Hspa1a	37
GO	CC	GO:0034399	nuclear periphery	31/2279	134/17165	0.00124338	0.0225363	ENSMUSG00000001157/ENSMUSG00000004880/ENSMUSG00000004934/ENSMUSG00000015222/ENSMUSG00000020661/ENSMUSG00000021694/ENSMUSG00000021938/ENSMUSG00000022314/ENSMUSG00000024045/ENSMUSG00000024170/ENSMUSG00000024590/ENSMUSG00000024974/ENSMUSG00000025862/ENSMUSG00000026605/ENSMUSG00000028820/ENSMUSG00000029053/ENSMUSG00000030528/ENSMUSG00000030822/ENSMUSG00000031691/ENSMUSG00000032249/ENSMUSG00000038759/…	Gmcl1/Lbr/Pias4/Map2/Dnmt3a/Ercc8/Pspc1/Rad21/Akap8/Telo2/Lmnb1/Smc3/Stag2/Cenpf/Sfpq/Prkcz/Blm/Prr14/Tnpo2/Anp32a/Nup205/Suv39h1/Morc3/Hnrnpu/Scaf8/Nup107/Hnrnpm/Trp53/Prpf40a/Arfgef1/Ranbp6	31
GO	BP	GO:0034453	microtubule anchoring	2267-10-01	24/17047	0.000561343	0.0229693	ENSMUSG00000022677/ENSMUSG00000031922/ENSMUSG00000033671/ENSMUSG00000037234/ENSMUSG00000037933/ENSMUSG00000038039/ENSMUSG00000038570/ENSMUSG00000048038/ENSMUSG00000064302/ENSMUSG00000069135	Fopnl/Cep57/Cep350/Hook3/Bicd2/Gcc2/Fam154b/4932418E24Rik/Clasp1/Fgfr1op	10
GO	CC	GO:0005635	nuclear envelope	82/2279	447/17165	0.00132509	0.0234315	ENSMUSG00000001157/ENSMUSG00000001211/ENSMUSG00000002372/ENSMUSG00000002718/ENSMUSG00000003226/ENSMUSG00000004655/ENSMUSG00000004880/ENSMUSG00000008206/ENSMUSG00000010517/ENSMUSG00000015023/ENSMUSG00000018707/ENSMUSG00000019961/ENSMUSG00000020063/ENSMUSG00000020189/ENSMUSG00000020458/ENSMUSG00000020594/ENSMUSG00000020739/ENSMUSG00000021149/ENSMUSG00000022142/ENSMUSG00000022255/ENSMUSG00000022391/…	Gmcl1/Agpat3/Ranbp3/Cse1l/Ranbp2/Aqp1/Lbr/Cers4/Faf1/Ddx19a/Dync1h1/Tmpo/Sirt1/Osbpl8/Rtn4/Pum2/Nup85/Gtpbp4/Nup155/Mtdh/Rangap1/Rogdi/Senp2/Lrpprc/Bin1/Lmnb1/Tm7sf2/Tnks2/Slc29a2/Slc16a3/Rb1cc1/Unc50/Cenpf/P2rx3/Ybx1/Tmem57/Prkcz/Mad2l1/Nucb2/Rrm1/Cetn2/Agpat5/Tnpo2/Ist1/Mns1/Sh3bgrl2/Apeh/Ptplad1/Mad2l1bp/Rrp12/Prickle1/Aaas/Bicd2/Nup205/Nup133/Ipo8/Tmem194/Nup88/Rnf123/Fam169a/Tmem201/Lemd2/Gc…	82
GO	BP	GO:0044770	cell cycle phase transition	73/2267	378/17047	0.000582768	0.0236706	ENSMUSG00000000028/ENSMUSG00000004364/ENSMUSG00000007646/ENSMUSG00000010342/ENSMUSG00000014859/ENSMUSG00000015133/ENSMUSG00000015766/ENSMUSG00000017146/ENSMUSG00000017421/ENSMUSG00000017561/ENSMUSG00000020381/ENSMUSG00000020413/ENSMUSG00000020516/ENSMUSG00000020546/ENSMUSG00000021255/ENSMUSG00000021635/ENSMUSG00000021932/ENSMUSG00000022018/ENSMUSG00000022314/ENSMUSG00000022855/ENSMUSG00000022960/…	Cdc45/Cul3/Rad51c/Tex14/E2f4/Lrrk1/Eps8/Brca1/Zfp207/Crlf3/3010026O09Rik/Hus1/Rps6kb1/Stxbp4/Esrrb/Rad17/Rnaseh2b/Rgcc/Rad21/Senp2/Donson/Akap8/Ercc3/Lmnb1/Ddb1/Ovol1/Ccnj/Terf1/Cdc73/Cenpf/Nasp/Rpa2/Kmt2e/Miip/Cdc7/Casp2/Mad2l1/Blm/Anapc15/Brcc3/Mecp2/Cul4a/Rbl2/Nae1/Mre11a/Pias1/Npat/Usp37/Rfwd3/Mad2l1bp/Fam175a/Cdk5rap2/Lats1/Gltscr2/Sin3a/Cirbp/Zfp830/Gigyf2/Dcun1d3/Pbx1/Brsk2/Camk2d/Ankrd17/…	73
GO	MF	GO:0004003	ATP-dependent DNA helicase activity	2282-12-01	33/17092	0.000729252	0.0241124	ENSMUSG00000015971/ENSMUSG00000020752/ENSMUSG00000022471/ENSMUSG00000024382/ENSMUSG00000028089/ENSMUSG00000030243/ENSMUSG00000030528/ENSMUSG00000031928/ENSMUSG00000032480/ENSMUSG00000035266/ENSMUSG00000035842/ENSMUSG00000038685	Actr8/Recql5/Xrcc6/Ercc3/Chd1l/Recql/Blm/Mre11a/Dhx30/Helq/Ddx11/Rtel1	12
GO	BP	GO:0016579	protein deubiquitination	28/2267	112/17047	0.000598871	0.0241472	ENSMUSG00000006676/ENSMUSG00000018974/ENSMUSG00000019850/ENSMUSG00000022710/ENSMUSG00000025437/ENSMUSG00000025616/ENSMUSG00000026502/ENSMUSG00000027598/ENSMUSG00000029640/ENSMUSG00000031201/ENSMUSG00000031826/ENSMUSG00000032376/ENSMUSG00000033364/ENSMUSG00000033909/ENSMUSG00000034235/ENSMUSG00000036990/ENSMUSG00000038495/ENSMUSG00000041161/ENSMUSG00000041560/ENSMUSG00000043415/ENSMUSG00000045210/…	Usp19/Sart3/Tnfaip3/Usp7/Usp33/Usp16/Desi2/Itch/Usp12/Brcc3/Usp10/Usp3/Usp37/Usp36/Usp54/Otud4/Otud7b/Otud3/Gltscr2/Otud1/Vcpip1/Yod1/Usp21/Usp34/Usp47/Mysm1/Usp31/Usp49	28
GO	BP	GO:0071826	ribonucleoprotein complex subunit organization	49/2267	232/17047	0.00060589	0.0241559	ENSMUSG00000000167/ENSMUSG00000000355/ENSMUSG00000001767/ENSMUSG00000003660/ENSMUSG00000005682/ENSMUSG00000008373/ENSMUSG00000014907/ENSMUSG00000015748/ENSMUSG00000018379/ENSMUSG00000018707/ENSMUSG00000018974/ENSMUSG00000020362/ENSMUSG00000020459/ENSMUSG00000020594/ENSMUSG00000020832/ENSMUSG00000020850/ENSMUSG00000021270/ENSMUSG00000021519/ENSMUSG00000023051/ENSMUSG00000026361/ENSMUSG00000027079/…	Pih1d2/Mcts1/Crnkl1/Snrnp200/Pan2/Prpf31/Naf1/Prpf3/Srsf1/Dync1h1/Sart3/Cnot6/Mtif2/Pum2/Eral1/Prpf8/Hsp90aa1/Mterfd1/Tarbp2/Cdc73/Clp1/Ddx20/2810403A07Rik/Ago3/Tfip11/Sfswap/Pan3/Rbmx/Nip7/Ddx6/Dhx30/Scaf11/Cnot6l/Cpsf7/Dhx8/Gcfc2/Shq1/Mrps2/Ythdc1/Surf6/Cnot1/Ago2/Dicer1/Gltscr2/Mcts2/Cirbp/Gemin6/Srpk2/Eif3g	49
GO	BP	GO:0000288	nuclear-transcribed mRNA catabolic process, deadenylation-dependent decay	15/2267	46/17047	0.000607832	0.0241559	ENSMUSG00000005682/ENSMUSG00000020362/ENSMUSG00000021962/ENSMUSG00000027752/ENSMUSG00000029647/ENSMUSG00000032498/ENSMUSG00000034724/ENSMUSG00000036550/ENSMUSG00000036698/ENSMUSG00000036779/ENSMUSG00000037573/ENSMUSG00000039356/ENSMUSG00000043702/ENSMUSG00000047888/ENSMUSG00000072437	Pan2/Cnot6/Dcp1a/Exosc8/Pan3/Mlh1/Cnot6l/Cnot1/Ago2/Papd5/Tob1/Exosc2/Pde12/Tnrc6b/Nanos1	15
GO	BP	GO:0070507	regulation of microtubule cytoskeleton organization	42/2267	191/17047	0.000614597	0.0242502	ENSMUSG00000005871/ENSMUSG00000008035/ENSMUSG00000015095/ENSMUSG00000015222/ENSMUSG00000018707/ENSMUSG00000020181/ENSMUSG00000020212/ENSMUSG00000020492/ENSMUSG00000023345/ENSMUSG00000024277/ENSMUSG00000024974/ENSMUSG00000025758/ENSMUSG00000025862/ENSMUSG00000025900/ENSMUSG00000025925/ENSMUSG00000026933/ENSMUSG00000027115/ENSMUSG00000027329/ENSMUSG00000027883/ENSMUSG00000029166/ENSMUSG00000031393/…	Apc/Mid1ip1/Fbxw5/Map2/Dync1h1/Nav3/Mdm1/Ska2/Poc1a/Mapre2/Smc3/Plk4/Stag2/Rp1/Terf1/Camsap1/Kif18a/Spef1/Gpsm2/Mapre3/Mecp2/Dixdc1/Trim36/Traf3ip1/Fam179b/Cep85/Bicd2/Pde4dip/Cep250/Cdk5rap2/Hnrnpu/Spice1/Cep120/Tmem67/Clip1/Mapk15/Alms1/Clasp1/Psrc1/Kifc1/Ttbk2/Hspa1a	42
GO	BP	GO:0045786	negative regulation of cell cycle	80/2267	423/17047	0.000632886	0.0247948	ENSMUSG00000003068/ENSMUSG00000005871/ENSMUSG00000010342/ENSMUSG00000014668/ENSMUSG00000015133/ENSMUSG00000017146/ENSMUSG00000017421/ENSMUSG00000017485/ENSMUSG00000017561/ENSMUSG00000019850/ENSMUSG00000020038/ENSMUSG00000020212/ENSMUSG00000020381/ENSMUSG00000020413/ENSMUSG00000020493/ENSMUSG00000021258/ENSMUSG00000021635/ENSMUSG00000021932/ENSMUSG00000022018/ENSMUSG00000022248/ENSMUSG00000022314/…	Stk11/Apc/Tex14/Chfr/Lrrk1/Brca1/Zfp207/Top2b/Crlf3/Tnfaip3/Cry1/Mdm1/3010026O09Rik/Hus1/Prr11/Ccnk/Rad17/Rnaseh2b/Rgcc/Rad1/Rad21/Dlg1/Donson/Msh2/Bin1/Uhrf2/Ovol1/Smc3/Atrip/Stag2/Terf1/Cdc73/Angel2/Uhmk1/Wdr76/Cdk5rap1/Trp53inp1/Rpa2/Slc25a33/Kmt2e/Miip/Clock/Casp2/Mad2l1/Blm/Anapc15/Brcc3/Naa10/Cul4a/Rbl2/Nae1/Mre11a/Cep63/Rfwd3/Ccar2/Thoc5/Mad2l1bp/Fam175a/Gadd45a/Rad9b/Cdk5rap2/Lats1/Rnf167…	80
GO	CC	GO:0000792	heterochromatin	23/2279	91/17165	0.00148255	0.0248867	ENSMUSG00000002748/ENSMUSG00000015149/ENSMUSG00000017485/ENSMUSG00000017548/ENSMUSG00000020063/ENSMUSG00000020661/ENSMUSG00000022556/ENSMUSG00000024660/ENSMUSG00000024817/ENSMUSG00000026739/ENSMUSG00000027242/ENSMUSG00000028397/ENSMUSG00000029177/ENSMUSG00000030695/ENSMUSG00000030816/ENSMUSG00000031393/ENSMUSG00000032097/ENSMUSG00000035024/ENSMUSG00000039231/ENSMUSG00000041560/ENSMUSG00000051627/…	Baz1b/Sirt2/Top2b/Suz12/Sirt1/Dnmt3a/Hsf1/Incenp/Uhrf2/Bmi1/Wdr76/Kdm4c/Cenpa/Aldoa/Rnf40/Mecp2/Ddx6/Ncapd3/Suv39h1/Gltscr2/Hist1h1e/Cbx7/Suv420h2	23
GO	CC	GO:0009295	nucleoid	14/2279	45/17165	0.00151037	0.0248867	ENSMUSG00000000934/ENSMUSG00000004069/ENSMUSG00000016319/ENSMUSG00000018574/ENSMUSG00000020079/ENSMUSG00000020549/ENSMUSG00000020718/ENSMUSG00000024120/ENSMUSG00000032480/ENSMUSG00000040429/ENSMUSG00000041168/ENSMUSG00000044763/ENSMUSG00000049038/ENSMUSG00000059447	Top1mt/Dnaja3/Slc25a5/Acadvl/Supv3l1/Elac2/Polg2/Lrpprc/Dhx30/Mterf1a/Lonp1/Trmt10c/Mterfd3/Hadhb	14
GO	CC	GO:0042645	mitochondrial nucleoid	14/2279	45/17165	0.00151037	0.0248867	ENSMUSG00000000934/ENSMUSG00000004069/ENSMUSG00000016319/ENSMUSG00000018574/ENSMUSG00000020079/ENSMUSG00000020549/ENSMUSG00000020718/ENSMUSG00000024120/ENSMUSG00000032480/ENSMUSG00000040429/ENSMUSG00000041168/ENSMUSG00000044763/ENSMUSG00000049038/ENSMUSG00000059447	Top1mt/Dnaja3/Slc25a5/Acadvl/Supv3l1/Elac2/Polg2/Lrpprc/Dhx30/Mterf1a/Lonp1/Trmt10c/Mterfd3/Hadhb	14
GO	BP	GO:1902017	regulation of cilium assembly	17/2267	56/17047	0.000687904	0.0266503	ENSMUSG00000002486/ENSMUSG00000024253/ENSMUSG00000025900/ENSMUSG00000026504/ENSMUSG00000028256/ENSMUSG00000032221/ENSMUSG00000032782/ENSMUSG00000033904/ENSMUSG00000040860/ENSMUSG00000046985/ENSMUSG00000047388/ENSMUSG00000048799/ENSMUSG00000049538/ENSMUSG00000058230/ENSMUSG00000063450/ENSMUSG00000063704/ENSMUSG00000090100	Tchp/Dync2li1/Rp1/Sdccag8/Odf2l/Mns1/Cntrob/Ccp110/Crocc/Tapt1/Atmin/Cep120/Adamts16/Arhgap35/Syne2/Mapk15/Ttbk2	17
GO	BP	GO:0001701	in utero embryonic development	79/2267	418/17047	0.000696309	0.0266503	ENSMUSG00000000530/ENSMUSG00000001036/ENSMUSG00000001280/ENSMUSG00000002052/ENSMUSG00000004364/ENSMUSG00000004931/ENSMUSG00000005609/ENSMUSG00000006127/ENSMUSG00000008976/ENSMUSG00000015846/ENSMUSG00000018160/ENSMUSG00000018379/ENSMUSG00000018486/ENSMUSG00000020346/ENSMUSG00000020458/ENSMUSG00000020647/ENSMUSG00000020718/ENSMUSG00000020782/ENSMUSG00000020936/ENSMUSG00000020937/ENSMUSG00000021255/…	Acvrl1/Epn2/Sp1/Supt6/Cul3/Apba3/Ctr9/Inpp5k/Gabpa/Rxra/Med1/Srsf1/Wnt9b/Mgat1/Rtn4/Ncoa1/Polg2/Llgl2/Nmt1/Plcd3/Esrrb/Col4a3bp/Bmpr1a/Rnaseh2b/Tab1/Hsf1/Rrn3/Senp2/Birc6/Msh2/Zfand5/Plk4/Als2/Eif4e2/Epb4.1l5/Bmi1/Sp3/Tm4sf1/Kdm4c/Ybx1/Nasp/Mfn2/Add1/N4bp2l2/Ybx3/Rbbp6/Cul4a/Gins4/Tmem231/Egln1/Rpgrip1l/Cnot1/Thoc2/Wdtc1/Wdr19/Prdm1/Tctn1/Suv39h1/Lats1/Sin3a/Ubr3/Setd2/Zfp830/Slc39a3/Tapt1/Kmt2d/…	79
GO	BP	GO:1903312	negative regulation of mRNA metabolic process	21/2267	76/17047	0.000696984	0.0266503	ENSMUSG00000003435/ENSMUSG00000005609/ENSMUSG00000011960/ENSMUSG00000015165/ENSMUSG00000020576/ENSMUSG00000021012/ENSMUSG00000022185/ENSMUSG00000024097/ENSMUSG00000026634/ENSMUSG00000028639/ENSMUSG00000028911/ENSMUSG00000028991/ENSMUSG00000029439/ENSMUSG00000030816/ENSMUSG00000031060/ENSMUSG00000035139/ENSMUSG00000036779/ENSMUSG00000037573/ENSMUSG00000039630/ENSMUSG00000041459/ENSMUSG00000045193	Supt5/Ctr9/Ccnt1/Hnrnpl/Nbas/Zc3h14/Acin1/Srsf7/Angel2/Ybx1/Srsf4/Mtor/Sfswap/Rnf40/Rbm10/Secisbp2/Papd5/Tob1/Hnrnpu/Tardbp/Cirbp	21
GO	BP	GO:0071108	protein K48-linked deubiquitination	2267-12-01	33/17047	0.000703292	0.0266503	ENSMUSG00000006676/ENSMUSG00000019850/ENSMUSG00000022710/ENSMUSG00000025437/ENSMUSG00000026502/ENSMUSG00000033364/ENSMUSG00000036990/ENSMUSG00000038495/ENSMUSG00000041161/ENSMUSG00000045210/ENSMUSG00000046404/ENSMUSG00000056342	Usp19/Tnfaip3/Usp7/Usp33/Desi2/Usp37/Otud4/Otud7b/Otud3/Vcpip1/Yod1/Usp34	12
GO	BP	GO:1904356	regulation of telomere maintenance via telomere lengthening	18/2267	61/17047	0.000705926	0.0266503	ENSMUSG00000001415/ENSMUSG00000002948/ENSMUSG00000007589/ENSMUSG00000014426/ENSMUSG00000014907/ENSMUSG00000017264/ENSMUSG00000021972/ENSMUSG00000022234/ENSMUSG00000024811/ENSMUSG00000025925/ENSMUSG00000027185/ENSMUSG00000029454/ENSMUSG00000036779/ENSMUSG00000037570/ENSMUSG00000038685/ENSMUSG00000039630/ENSMUSG00000046434/ENSMUSG00000063704	Smg5/Map2k7/Tinf2/Map3k4/Naf1/Exosc10/Hmbox1/Cct5/Tnks2/Terf1/Nat10/Mapkapk5/Papd5/Mcrs1/Rtel1/Hnrnpu/Hnrnpa1/Mapk15	18
GO	BP	GO:0035871	protein K11-linked deubiquitination	2267-06-01	10/17047	0.00071402	0.0266503	ENSMUSG00000019850/ENSMUSG00000033364/ENSMUSG00000038495/ENSMUSG00000041161/ENSMUSG00000045210/ENSMUSG00000046404	Tnfaip3/Usp37/Otud7b/Otud3/Vcpip1/Yod1	6
GO	BP	GO:1903441	protein localization to ciliary membrane	2267-06-01	10/17047	0.00071402	0.0266503	ENSMUSG00000022911/ENSMUSG00000025035/ENSMUSG00000025245/ENSMUSG00000031028/ENSMUSG00000031755/ENSMUSG00000037890	Arl13b/Arl3/Lztfl1/Tub/Bbs2/Wdr19	6
GO	BP	GO:0031647	regulation of protein stability	55/2267	270/17047	0.000734875	0.0272446	ENSMUSG00000004069/ENSMUSG00000004364/ENSMUSG00000006676/ENSMUSG00000014668/ENSMUSG00000015478/ENSMUSG00000017376/ENSMUSG00000017421/ENSMUSG00000018651/ENSMUSG00000020063/ENSMUSG00000020238/ENSMUSG00000020458/ENSMUSG00000020538/ENSMUSG00000020546/ENSMUSG00000021149/ENSMUSG00000021270/ENSMUSG00000022124/ENSMUSG00000022234/ENSMUSG00000022710/ENSMUSG00000022855/ENSMUSG00000024170/ENSMUSG00000024589/…	Dnaja3/Cul3/Usp19/Chfr/Rnf5/Nlk/Zfp207/Tada2a/Sirt1/Ncln/Rtn4/Srebf1/Stxbp4/Gtpbp4/Hsp90aa1/Fbxl3/Cct5/Usp7/Senp2/Telo2/Nedd4l/Btrc/Usp33/Get4/Cdc73/Stxbp1/Tsc1/Hypk/Mcm8/Aurka/Trim24/Atf7ip/Kras/Lamp1/Usp3/Lss/Ccar2/Usp36/Siah1a/Rnf139/Cdkn2aip/Morc3/Pex2/Otud3/Pik3r1/Tardbp/Gltscr2/Zbed3/Swsap1/Mdm4/Ep300/Usp34/Gapdh/Usp47/Trp53	55
GO	BP	GO:0006611	protein export from nucleus	29/2267	119/17047	0.000754274	0.0277774	ENSMUSG00000001017/ENSMUSG00000002052/ENSMUSG00000002372/ENSMUSG00000002718/ENSMUSG00000020739/ENSMUSG00000022142/ENSMUSG00000022391/ENSMUSG00000024384/ENSMUSG00000024604/ENSMUSG00000026667/ENSMUSG00000026812/ENSMUSG00000027893/ENSMUSG00000031451/ENSMUSG00000033411/ENSMUSG00000034274/ENSMUSG00000035851/ENSMUSG00000037475/ENSMUSG00000039509/ENSMUSG00000040667/ENSMUSG00000041815/ENSMUSG00000042650/…	Chtop/Supt6/Ranbp3/Cse1l/Nup85/Nup155/Rangap1/Iws1/Rbm22/Uhmk1/Tsc1/Ahcyl1/Gas6/Ctdspl2/Thoc5/Ythdc1/Thoc2/Nup133/Nup88/Poldip3/Alkbh5/Setd2/Nupl2/Nup160/Nup107/Styx/Strada/Gm14698/Rbm15b	29
GO	BP	GO:2000001	regulation of DNA damage checkpoint	2267-08-01	17/17047	0.000767371	0.0279845	ENSMUSG00000020038/ENSMUSG00000021932/ENSMUSG00000027242/ENSMUSG00000028884/ENSMUSG00000031446/ENSMUSG00000033596/ENSMUSG00000033712/ENSMUSG00000034274	Cry1/Rnaseh2b/Wdr76/Rpa2/Cul4a/Rfwd3/Ccar2/Thoc5	8
GO	BP	GO:0031331	positive regulation of cellular catabolic process	66/2267	338/17047	0.000771156	0.0279845	ENSMUSG00000000628/ENSMUSG00000003068/ENSMUSG00000003435/ENSMUSG00000004221/ENSMUSG00000007670/ENSMUSG00000010517/ENSMUSG00000010554/ENSMUSG00000013858/ENSMUSG00000014668/ENSMUSG00000015149/ENSMUSG00000019850/ENSMUSG00000020063/ENSMUSG00000020079/ENSMUSG00000020220/ENSMUSG00000020366/ENSMUSG00000020601/ENSMUSG00000021255/ENSMUSG00000021270/ENSMUSG00000022255/ENSMUSG00000022556/ENSMUSG00000025234/…	Hk2/Stk11/Supt5/Ikbkg/Khsrp/Faf1/Mettl16/Tmem259/Chfr/Sirt2/Tnfaip3/Sirt1/Supv3l1/Vps13d/Mapk9/Trib2/Esrrb/Hsp90aa1/Mtdh/Hsf1/Arih1/Fyco1/Pip4k2c/Optn/Tsc1/Gpsm1/Aurka/Itch/Mettl14/Trp53inp1/Pum1/Mfn2/Det1/Rnf40/Pias1/Adra2a/Cnot6l/Prickle1/Cnot1/Tmtc3/Ago2/Sh3glb1/Rnf139/Bbs7/Tob1/Edem2/Sesn1/Trp53inp2/Kcne2/Fbxl5/Gltscr2/Gtpbp1/Adrb2/Ythdf3/Tnrc6b/Gigyf2/Socs4/Foxo3/Smcr8/Amer1/Upf1/Arih2/Hnrnp…	66
GO	BP	GO:0032786	positive regulation of DNA-templated transcription, elongation	2267-11-01	29/17047	0.000775095	0.0279845	ENSMUSG00000002052/ENSMUSG00000003435/ENSMUSG00000005609/ENSMUSG00000011960/ENSMUSG00000026361/ENSMUSG00000034274/ENSMUSG00000041297/ENSMUSG00000042487/ENSMUSG00000053411/ENSMUSG00000061559/ENSMUSG00000067995	Supt6/Supt5/Ctr9/Ccnt1/Cdc73/Thoc5/Cdk13/Leo1/Cbx7/Wdr61/Gtf2f2	11
GO	BP	GO:0000819	sister chromatid segregation	38/2267	170/17047	0.000785962	0.0281925	ENSMUSG00000004364/ENSMUSG00000007646/ENSMUSG00000010342/ENSMUSG00000015133/ENSMUSG00000017421/ENSMUSG00000017485/ENSMUSG00000022141/ENSMUSG00000022314/ENSMUSG00000024045/ENSMUSG00000024293/ENSMUSG00000024660/ENSMUSG00000024974/ENSMUSG00000025862/ENSMUSG00000025925/ENSMUSG00000027115/ENSMUSG00000027331/ENSMUSG00000028820/ENSMUSG00000029910/ENSMUSG00000030649/ENSMUSG00000031388/ENSMUSG00000031858/…	Cul3/Rad51c/Tex14/Lrrk1/Zfp207/Top2b/Nipbl/Rad21/Akap8/Esco1/Incenp/Smc3/Stag2/Terf1/Kif18a/Knstrn/Sfpq/Mad2l1/Anapc15/Naa10/Mau2/Mre11a/Smc4/Mad2l1bp/Ncapd3/Ddx11/Stag3/Cdk5rap2/Hnrnpu/Lats1/Mis12/Wapal/Bod1/Chtf8/Map10/Mapk15/Psrc1/Kifc1	38
GO	MF	GO:0030145	manganese ion binding	17/2282	57/17092	0.000900406	0.0288411	ENSMUSG00000016386/ENSMUSG00000020346/ENSMUSG00000021125/ENSMUSG00000021504/ENSMUSG00000021918/ENSMUSG00000022401/ENSMUSG00000023030/ENSMUSG00000026596/ENSMUSG00000028413/ENSMUSG00000028630/ENSMUSG00000029410/ENSMUSG00000030402/ENSMUSG00000031928/ENSMUSG00000032418/ENSMUSG00000032570/ENSMUSG00000061130/ENSMUSG00000090035	Mpped2/Mgat1/Arg2/B4galt7/Nek4/Xpnpep3/Slc11a2/Abl2/B4galt1/Dyrk2/Ppef2/Ppm1n/Mre11a/Me1/Atp2c1/Ppm1b/Galnt4	17
GO	BP	GO:0007549	dosage compensation	2267-09-01	21/17047	0.000831858	0.0296463	ENSMUSG00000017146/ENSMUSG00000017264/ENSMUSG00000022160/ENSMUSG00000024054/ENSMUSG00000035851/ENSMUSG00000039630/ENSMUSG00000048109/ENSMUSG00000058301/ENSMUSG00000074102	Brca1/Exosc10/Mettl3/Smchd1/Ythdc1/Hnrnpu/Rbm15/Upf1/Rbm15b	9
GO	BP	GO:1901991	negative regulation of mitotic cell cycle phase transition	31/2267	131/17047	0.00085921	0.0304249	ENSMUSG00000010342/ENSMUSG00000017146/ENSMUSG00000017421/ENSMUSG00000020381/ENSMUSG00000020413/ENSMUSG00000021635/ENSMUSG00000022018/ENSMUSG00000022314/ENSMUSG00000022960/ENSMUSG00000025925/ENSMUSG00000026361/ENSMUSG00000028884/ENSMUSG00000029022/ENSMUSG00000029863/ENSMUSG00000029910/ENSMUSG00000030528/ENSMUSG00000030649/ENSMUSG00000031666/ENSMUSG00000031878/ENSMUSG00000031928/ENSMUSG00000033596/…	Tex14/Brca1/Zfp207/3010026O09Rik/Hus1/Rad17/Rgcc/Rad21/Donson/Terf1/Cdc73/Rpa2/Miip/Casp2/Mad2l1/Blm/Anapc15/Rbl2/Nae1/Mre11a/Rfwd3/Mad2l1bp/Cdk5rap2/Gltscr2/Zfp830/Gigyf2/Dcun1d3/Usp47/Trp53/Taok2/Taok3	31
GO	MF	GO:0008276	protein methyltransferase activity	22/2282	83/17092	0.00102345	0.0308836	ENSMUSG00000006307/ENSMUSG00000006920/ENSMUSG00000015697/ENSMUSG00000017548/ENSMUSG00000019795/ENSMUSG00000026439/ENSMUSG00000026646/ENSMUSG00000027589/ENSMUSG00000029004/ENSMUSG00000032579/ENSMUSG00000036893/ENSMUSG00000038056/ENSMUSG00000039065/ENSMUSG00000039231/ENSMUSG00000039662/ENSMUSG00000044791/ENSMUSG00000045098/ENSMUSG00000048154/ENSMUSG00000051977/ENSMUSG00000059851/ENSMUSG00000061759/…	Kmt2b/Ezh1/Setdb1/Suz12/Pcmt1/Rbbp5/Suv39h2/Pcmtd2/Kmt2e/Hemk1/Ehmt1/Kmt2c/Fam173b/Suv39h1/Icmt/Setd2/Suv420h1/Kmt2d/Prdm9/Suv420h2/1700052N19Rik/Lcmt2	22
GO	MF	GO:0071617	lysophospholipid acyltransferase activity	2282-07-01	14/17092	0.00108816	0.0308836	ENSMUSG00000001211/ENSMUSG00000026623/ENSMUSG00000031467/ENSMUSG00000033192/ENSMUSG00000037062/ENSMUSG00000041653/ENSMUSG00000054469	Agpat3/Lpgat1/Agpat5/Lpcat2/Sh3glb1/Pnpla3/Lclat1	7
GO	MF	GO:0001098	basal transcription machinery binding	16/2282	53/17092	0.00109272	0.0308836	ENSMUSG00000005609/ENSMUSG00000020752/ENSMUSG00000021255/ENSMUSG00000022828/ENSMUSG00000024271/ENSMUSG00000026361/ENSMUSG00000033712/ENSMUSG00000036698/ENSMUSG00000038406/ENSMUSG00000039630/ENSMUSG00000039849/ENSMUSG00000041328/ENSMUSG00000042487/ENSMUSG00000046201/ENSMUSG00000051316/ENSMUSG00000059552	Ctr9/Recql5/Esrrb/Gtf2e1/Elp2/Cdc73/Ccar2/Ago2/Scaf1/Hnrnpu/Pcif1/Pcf11/Leo1/Scaf8/Taf7/Trp53	16
GO	MF	GO:0001099	basal RNA polymerase II transcription machinery binding	16/2282	53/17092	0.00109272	0.0308836	ENSMUSG00000005609/ENSMUSG00000020752/ENSMUSG00000021255/ENSMUSG00000022828/ENSMUSG00000024271/ENSMUSG00000026361/ENSMUSG00000033712/ENSMUSG00000036698/ENSMUSG00000038406/ENSMUSG00000039630/ENSMUSG00000039849/ENSMUSG00000041328/ENSMUSG00000042487/ENSMUSG00000046201/ENSMUSG00000051316/ENSMUSG00000059552	Ctr9/Recql5/Esrrb/Gtf2e1/Elp2/Cdc73/Ccar2/Ago2/Scaf1/Hnrnpu/Pcif1/Pcf11/Leo1/Scaf8/Taf7/Trp53	16
GO	MF	GO:0033558	protein deacetylase activity	2282-11-01	30/17092	0.00111482	0.0308836	ENSMUSG00000004698/ENSMUSG00000015149/ENSMUSG00000020063/ENSMUSG00000020519/ENSMUSG00000029524/ENSMUSG00000042557/ENSMUSG00000042570/ENSMUSG00000062906/ENSMUSG00000066900/ENSMUSG00000071646/ENSMUSG00000080268	Hdac9/Sirt2/Sirt1/Sap30l/Sirt4/Sin3a/Mier2/Hdac10/Suds3/Mta2/Brms1	11
GO	BP	GO:0006275	regulation of DNA replication	26/2267	104/17047	0.000922477	0.0324571	ENSMUSG00000010517/ENSMUSG00000020413/ENSMUSG00000021149/ENSMUSG00000021635/ENSMUSG00000022855/ENSMUSG00000022960/ENSMUSG00000024293/ENSMUSG00000024974/ENSMUSG00000025862/ENSMUSG00000025925/ENSMUSG00000026309/ENSMUSG00000026803/ENSMUSG00000027284/ENSMUSG00000029283/ENSMUSG00000030528/ENSMUSG00000030779/ENSMUSG00000031928/ENSMUSG00000033364/ENSMUSG00000039205/ENSMUSG00000040433/ENSMUSG00000041408/…	Faf1/Hus1/Gtpbp4/Rad17/Senp2/Donson/Esco1/Smc3/Stag2/Terf1/Ilkap/Ttf1/Cdan1/Cdc7/Blm/Rbbp6/Mre11a/Usp37/Ciz1/Zbtb38/Wapal/Zfp830/Chtf8/Ankrd17/Trp53/Mapk15	26
GO	BP	GO:1902850	microtubule cytoskeleton organization involved in mitosis	30/2267	126/17047	0.000928608	0.032466	ENSMUSG00000005233/ENSMUSG00000017421/ENSMUSG00000018707/ENSMUSG00000021693/ENSMUSG00000022114/ENSMUSG00000023345/ENSMUSG00000024301/ENSMUSG00000024974/ENSMUSG00000025228/ENSMUSG00000025862/ENSMUSG00000027475/ENSMUSG00000027496/ENSMUSG00000027883/ENSMUSG00000029177/ENSMUSG00000029910/ENSMUSG00000031393/ENSMUSG00000031516/ENSMUSG00000036678/ENSMUSG00000037313/ENSMUSG00000039298/ENSMUSG00000039630/…	Spc25/Zfp207/Dync1h1/Kif2a/Spry2/Poc1a/Kifc5b/Smc3/Actr1a/Stag2/Kif3b/Aurka/Gpsm2/Cenpa/Mad2l1/Mecp2/Dctn6/Aaas/Tacc3/Cdk5rap2/Hnrnpu/Asun/Spice1/Setd2/Map10/Eml1/Clasp1/Psrc1/Kifc1/Hspa1a	30
GO	BP	GO:0022618	ribonucleoprotein complex assembly	46/2267	219/17047	0.000987467	0.0343067	ENSMUSG00000000167/ENSMUSG00000000355/ENSMUSG00000001767/ENSMUSG00000003660/ENSMUSG00000005682/ENSMUSG00000008373/ENSMUSG00000014907/ENSMUSG00000015748/ENSMUSG00000018379/ENSMUSG00000018707/ENSMUSG00000018974/ENSMUSG00000020362/ENSMUSG00000020594/ENSMUSG00000020832/ENSMUSG00000020850/ENSMUSG00000021270/ENSMUSG00000021519/ENSMUSG00000023051/ENSMUSG00000026361/ENSMUSG00000027079/ENSMUSG00000027905/…	Pih1d2/Mcts1/Crnkl1/Snrnp200/Pan2/Prpf31/Naf1/Prpf3/Srsf1/Dync1h1/Sart3/Cnot6/Pum2/Eral1/Prpf8/Hsp90aa1/Mterfd1/Tarbp2/Cdc73/Clp1/Ddx20/2810403A07Rik/Ago3/Sfswap/Pan3/Rbmx/Nip7/Ddx6/Dhx30/Scaf11/Cnot6l/Cpsf7/Gcfc2/Shq1/Mrps2/Ythdc1/Surf6/Cnot1/Ago2/Dicer1/Gltscr2/Mcts2/Cirbp/Gemin6/Srpk2/Eif3g	46
GO	MF	GO:0017056	structural constituent of nuclear pore	2282-09-01	22/17092	0.0012792	0.0345046	ENSMUSG00000020739/ENSMUSG00000022142/ENSMUSG00000038759/ENSMUSG00000039509/ENSMUSG00000040667/ENSMUSG00000051329/ENSMUSG00000052533/ENSMUSG00000052798/ENSMUSG00000053293	Nup85/Nup155/Nup205/Nup133/Nup88/Nup160/Nup188/Nup107/Pom121	9
GO	CC	GO:0031461	cullin-RING ubiquitin ligase complex	33/2279	150/17165	0.00215332	0.0346924	ENSMUSG00000004364/ENSMUSG00000014164/ENSMUSG00000015095/ENSMUSG00000020107/ENSMUSG00000021694/ENSMUSG00000022124/ENSMUSG00000024740/ENSMUSG00000025217/ENSMUSG00000025234/ENSMUSG00000026455/ENSMUSG00000026571/ENSMUSG00000029276/ENSMUSG00000030031/ENSMUSG00000030610/ENSMUSG00000030649/ENSMUSG00000030811/ENSMUSG00000031446/ENSMUSG00000032030/ENSMUSG00000033948/ENSMUSG00000034636/ENSMUSG00000035572/…	Cul3/Klhl3/Fbxw5/Anapc16/Ercc8/Fbxl3/Ddb1/Btrc/Arih1/Klhl12/Dcaf6/Glmn/Kbtbd8/Det1/Anapc15/Fbxl19/Cul4a/Cul5/Zswim5/Zyg11b/Dcaf10/Zswim4/Siah1a/Anapc10/Fbxl5/Dcaf17/Gan/Klhl25/Spop/Usp47/Arih2/Fbxl12/Klhl9	33
GO	MF	GO:0003841	1-acylglycerol-3-phosphate O-acyltransferase activity	2282-06-01	11/17092	0.00142411	0.0356027	ENSMUSG00000001211/ENSMUSG00000026623/ENSMUSG00000031467/ENSMUSG00000033192/ENSMUSG00000041653/ENSMUSG00000054469	Agpat3/Lpgat1/Agpat5/Lpcat2/Pnpla3/Lclat1	6
GO	MF	GO:0005221	intracellular cyclic nucleotide activated cation channel activity	2282-06-01	11/17092	0.00142411	0.0356027	ENSMUSG00000004655/ENSMUSG00000021730/ENSMUSG00000027674/ENSMUSG00000030897/ENSMUSG00000031789/ENSMUSG00000067220	Aqp1/Hcn1/Pex5l/Cnga4/Cngb1/Cnga1	6
GO	MF	GO:0043855	cyclic nucleotide-gated ion channel activity	2282-06-01	11/17092	0.00142411	0.0356027	ENSMUSG00000004655/ENSMUSG00000021730/ENSMUSG00000027674/ENSMUSG00000030897/ENSMUSG00000031789/ENSMUSG00000067220	Aqp1/Hcn1/Pex5l/Cnga4/Cngb1/Cnga1	6
GO	BP	GO:0006405	RNA export from nucleus	20/2267	73/17047	0.00103901	0.0356492	ENSMUSG00000001017/ENSMUSG00000002052/ENSMUSG00000008301/ENSMUSG00000020739/ENSMUSG00000022119/ENSMUSG00000022142/ENSMUSG00000024384/ENSMUSG00000024491/ENSMUSG00000026812/ENSMUSG00000034274/ENSMUSG00000035851/ENSMUSG00000037475/ENSMUSG00000039509/ENSMUSG00000040667/ENSMUSG00000041815/ENSMUSG00000042650/ENSMUSG00000044791/ENSMUSG00000051329/ENSMUSG00000052798/ENSMUSG00000074102	Chtop/Supt6/Phax/Nup85/Rbm26/Nup155/Iws1/Rbm27/Tsc1/Thoc5/Ythdc1/Thoc2/Nup133/Nup88/Poldip3/Alkbh5/Setd2/Nup160/Nup107/Rbm15b	20
GO	BP	GO:1903313	positive regulation of mRNA metabolic process	20/2267	73/17047	0.00103901	0.0356492	ENSMUSG00000007670/ENSMUSG00000010554/ENSMUSG00000022556/ENSMUSG00000026361/ENSMUSG00000028114/ENSMUSG00000028580/ENSMUSG00000031134/ENSMUSG00000034724/ENSMUSG00000036550/ENSMUSG00000036698/ENSMUSG00000037573/ENSMUSG00000042487/ENSMUSG00000042535/ENSMUSG00000045193/ENSMUSG00000047213/ENSMUSG00000047888/ENSMUSG00000048000/ENSMUSG00000058301/ENSMUSG00000066037/ENSMUSG00000072437	Khsrp/Mettl16/Hsf1/Cdc73/Mettl14/Pum1/Rbmx/Cnot6l/Cnot1/Ago2/Tob1/Leo1/Gtpbp1/Cirbp/Ythdf3/Tnrc6b/Gigyf2/Upf1/Hnrnpr/Nanos1	20
GO	BP	GO:0061051	positive regulation of cell growth involved in cardiac muscle cell development	2267-07-01	14/17047	0.00106218	0.0360594	ENSMUSG00000005124/ENSMUSG00000019487/ENSMUSG00000020063/ENSMUSG00000028991/ENSMUSG00000036023/ENSMUSG00000055024/ENSMUSG00000059743	Wisp1/Trip10/Sirt1/Mtor/Parp2/Ep300/Fdps	7
GO	BP	GO:0007224	smoothened signaling pathway	30/2267	127/17047	0.00106403	0.0360594	ENSMUSG00000005514/ENSMUSG00000018199/ENSMUSG00000022911/ENSMUSG00000025008/ENSMUSG00000025035/ENSMUSG00000027778/ENSMUSG00000028630/ENSMUSG00000029469/ENSMUSG00000029510/ENSMUSG00000030323/ENSMUSG00000031951/ENSMUSG00000032238/ENSMUSG00000033276/ENSMUSG00000033282/ENSMUSG00000034121/ENSMUSG00000034292/ENSMUSG00000034601/ENSMUSG00000034848/ENSMUSG00000037325/ENSMUSG00000037890/ENSMUSG00000038122/…	Por/Trove2/Arl13b/Tctn3/Arl3/Ift80/Dyrk2/Ift81/Gpc2/Ift122/Tmem231/Rora/Stk36/Rpgrip1l/Mks1/Traf3ip1/2700049A03Rik/Ttc21b/Bbs7/Wdr19/Tbc1d32/Ift172/Tctn1/Scube3/Cc2d2a/Gas8/Megf8/Dync2h1/Intu/Ttbk2	30
GO	BP	GO:0050686	negative regulation of mRNA processing	2267-11-01	30/17047	0.00107816	0.0363155	ENSMUSG00000003435/ENSMUSG00000005609/ENSMUSG00000011960/ENSMUSG00000015165/ENSMUSG00000021012/ENSMUSG00000022185/ENSMUSG00000024097/ENSMUSG00000028911/ENSMUSG00000029439/ENSMUSG00000030816/ENSMUSG00000031060	Supt5/Ctr9/Ccnt1/Hnrnpl/Zc3h14/Acin1/Srsf7/Srsf4/Sfswap/Rnf40/Rbm10	11
GO	BP	GO:0000959	mitochondrial RNA metabolic process	13/2267	39/17047	0.00109899	0.0367927	ENSMUSG00000020079/ENSMUSG00000020549/ENSMUSG00000021519/ENSMUSG00000024120/ENSMUSG00000026709/ENSMUSG00000027487/ENSMUSG00000028982/ENSMUSG00000033871/ENSMUSG00000040429/ENSMUSG00000043702/ENSMUSG00000044763/ENSMUSG00000048756/ENSMUSG00000049038	Supv3l1/Elac2/Mterfd1/Lrpprc/Dars2/Cdk5rap1/Slc25a33/Ppargc1b/Mterf1a/Pde12/Trmt10c/Foxo3/Mterfd3	13
GO	CC	GO:0060170	ciliary membrane	17/2279	62/17165	0.00233809	0.0368503	ENSMUSG00000006464/ENSMUSG00000021013/ENSMUSG00000021803/ENSMUSG00000022911/ENSMUSG00000025386/ENSMUSG00000029064/ENSMUSG00000029086/ENSMUSG00000030324/ENSMUSG00000031755/ENSMUSG00000031951/ENSMUSG00000035919/ENSMUSG00000037325/ENSMUSG00000049488/ENSMUSG00000063145/ENSMUSG00000067220/ENSMUSG00000071648/ENSMUSG00000075410	Bbs1/Ttc8/Cdhr1/Arl13b/Pde6g/Gnb1/Prom1/Rho/Bbs2/Tmem231/Bbs9/Bbs7/Tmem67/Bbs5/Cnga1/Rom1/Gm11744	17
GO	CC	GO:0061695	transferase complex, transferring phosphorus-containing groups	47/2279	235/17165	0.00243803	0.0370758	ENSMUSG00000000530/ENSMUSG00000004221/ENSMUSG00000005609/ENSMUSG00000006599/ENSMUSG00000011960/ENSMUSG00000020528/ENSMUSG00000020752/ENSMUSG00000020974/ENSMUSG00000021196/ENSMUSG00000021258/ENSMUSG00000022828/ENSMUSG00000024382/ENSMUSG00000025010/ENSMUSG00000025049/ENSMUSG00000025199/ENSMUSG00000025280/ENSMUSG00000025907/ENSMUSG00000026361/ENSMUSG00000027427/ENSMUSG00000027636/ENSMUSG00000027665/…	Acvrl1/Ikbkg/Ctr9/Gtf2h1/Ccnt1/Prpsap2/Recql5/Pole2/Pfkp/Ccnk/Gtf2e1/Ercc3/Ccnj/Taf5/Chuk/Polr3a/Rb1cc1/Cdc73/Polr3f/Sla2/Pik3ca/Polr3gl/Prkab1/Pold3/Pkm/Cish/Prkar2a/Gtf2a2/Rpap1/Prkab2/Socs7/Pold1/Taf4a/Pex2/Cdk13/Pik3r1/Leo1/Zfp768/Smcr8/Taf7/Taf4b/Las1l/Trp53/Wdr61/Gtf2f2/Cdk5r2/Nim1k	47
GO	CC	GO:0031464	Cul4A-RING E3 ubiquitin ligase complex	2279-06-01	12/17165	0.00245467	0.0370758	ENSMUSG00000021694/ENSMUSG00000024740/ENSMUSG00000025234/ENSMUSG00000029276/ENSMUSG00000030610/ENSMUSG00000031446	Ercc8/Ddb1/Arih1/Glmn/Det1/Cul4a	6
GO	MF	GO:0003697	single-stranded DNA binding	26/2282	107/17092	0.0015271	0.0372684	ENSMUSG00000000028/ENSMUSG00000002814/ENSMUSG00000014850/ENSMUSG00000022556/ENSMUSG00000024120/ENSMUSG00000024151/ENSMUSG00000025925/ENSMUSG00000026669/ENSMUSG00000027201/ENSMUSG00000027323/ENSMUSG00000027353/ENSMUSG00000028639/ENSMUSG00000028884/ENSMUSG00000030057/ENSMUSG00000030189/ENSMUSG00000030346/ENSMUSG00000030528/ENSMUSG00000032498/ENSMUSG00000034349/ENSMUSG00000035842/ENSMUSG00000039630/…	Cdc45/Top3a/Msh3/Hsf1/Lrpprc/Msh2/Terf1/Mcm10/Myef2/Rad51/Mcm8/Ybx1/Rpa2/Cnbp/Ybx3/Rad51ap1/Blm/Mlh1/Smc4/Ddx11/Hnrnpu/Lonp1/Hnrnpa1/Swsap1/Pcbp2/Rad51b	26
GO	CC	GO:1990391	DNA repair complex	2279-11-01	33/17165	0.00258078	0.038185	ENSMUSG00000014850/ENSMUSG00000021694/ENSMUSG00000022471/ENSMUSG00000024151/ENSMUSG00000024382/ENSMUSG00000031347/ENSMUSG00000032498/ENSMUSG00000038644/ENSMUSG00000043909/ENSMUSG00000049717/ENSMUSG00000051238	Msh3/Ercc8/Xrcc6/Msh2/Ercc3/Cetn2/Mlh1/Pold1/Trp53bp1/Lig4/Swsap1	11
GO	BP	GO:1902115	regulation of organelle assembly	42/2267	197/17047	0.00117926	0.0392424	ENSMUSG00000002486/ENSMUSG00000005583/ENSMUSG00000005682/ENSMUSG00000015478/ENSMUSG00000018707/ENSMUSG00000020212/ENSMUSG00000020362/ENSMUSG00000020366/ENSMUSG00000020628/ENSMUSG00000024253/ENSMUSG00000024974/ENSMUSG00000025417/ENSMUSG00000025758/ENSMUSG00000025862/ENSMUSG00000025900/ENSMUSG00000026504/ENSMUSG00000027883/ENSMUSG00000028256/ENSMUSG00000029647/ENSMUSG00000032221/ENSMUSG00000032782/…	Tchp/Mef2c/Pan2/Rnf5/Dync1h1/Mdm1/Cnot6/Mapk9/Trappc12/Dync2li1/Smc3/Pip4k2c/Plk4/Stag2/Rp1/Sdccag8/Gpsm2/Odf2l/Pan3/Mns1/Cntrob/Ccp110/Mtmr3/Cnot6l/Cnot1/Sh3glb1/Cdk5rap2/Hnrnpu/Crocc/Spice1/Tapt1/Atmin/Cep120/Smcr8/Adamts16/Ep300/Arhgap35/Syne2/Mapk15/Alms1/Ttbk2/Hspa1a	42
GO	MF	GO:0016278	lysine N-methyltransferase activity	16/2282	55/17092	0.00168786	0.0393195	ENSMUSG00000006307/ENSMUSG00000006920/ENSMUSG00000015697/ENSMUSG00000017548/ENSMUSG00000026439/ENSMUSG00000026646/ENSMUSG00000029004/ENSMUSG00000036893/ENSMUSG00000038056/ENSMUSG00000039065/ENSMUSG00000039231/ENSMUSG00000044791/ENSMUSG00000045098/ENSMUSG00000048154/ENSMUSG00000051977/ENSMUSG00000059851	Kmt2b/Ezh1/Setdb1/Suz12/Rbbp5/Suv39h2/Kmt2e/Ehmt1/Kmt2c/Fam173b/Suv39h1/Setd2/Suv420h1/Kmt2d/Prdm9/Suv420h2	16
GO	MF	GO:0016279	protein-lysine N-methyltransferase activity	16/2282	55/17092	0.00168786	0.0393195	ENSMUSG00000006307/ENSMUSG00000006920/ENSMUSG00000015697/ENSMUSG00000017548/ENSMUSG00000026439/ENSMUSG00000026646/ENSMUSG00000029004/ENSMUSG00000036893/ENSMUSG00000038056/ENSMUSG00000039065/ENSMUSG00000039231/ENSMUSG00000044791/ENSMUSG00000045098/ENSMUSG00000048154/ENSMUSG00000051977/ENSMUSG00000059851	Kmt2b/Ezh1/Setdb1/Suz12/Rbbp5/Suv39h2/Kmt2e/Ehmt1/Kmt2c/Fam173b/Suv39h1/Setd2/Suv420h1/Kmt2d/Prdm9/Suv420h2	16
GO	BP	GO:0032784	regulation of DNA-templated transcription, elongation	14/2267	44/17047	0.00120202	0.0395783	ENSMUSG00000002052/ENSMUSG00000003435/ENSMUSG00000005609/ENSMUSG00000011960/ENSMUSG00000020752/ENSMUSG00000026361/ENSMUSG00000033712/ENSMUSG00000034274/ENSMUSG00000039630/ENSMUSG00000041297/ENSMUSG00000042487/ENSMUSG00000053411/ENSMUSG00000061559/ENSMUSG00000067995	Supt6/Supt5/Ctr9/Ccnt1/Recql5/Cdc73/Ccar2/Thoc5/Hnrnpu/Cdk13/Leo1/Cbx7/Wdr61/Gtf2f2	14
GO	BP	GO:0032204	regulation of telomere maintenance	21/2267	79/17047	0.00120369	0.0395783	ENSMUSG00000001415/ENSMUSG00000002948/ENSMUSG00000007589/ENSMUSG00000014426/ENSMUSG00000014907/ENSMUSG00000017264/ENSMUSG00000021972/ENSMUSG00000022234/ENSMUSG00000024811/ENSMUSG00000025925/ENSMUSG00000027185/ENSMUSG00000029454/ENSMUSG00000031928/ENSMUSG00000036779/ENSMUSG00000037570/ENSMUSG00000038685/ENSMUSG00000039630/ENSMUSG00000046434/ENSMUSG00000058301/ENSMUSG00000059772/ENSMUSG00000063704	Smg5/Map2k7/Tinf2/Map3k4/Naf1/Exosc10/Hmbox1/Cct5/Tnks2/Terf1/Nat10/Mapkapk5/Mre11a/Papd5/Mcrs1/Rtel1/Hnrnpu/Hnrnpa1/Upf1/Slx1b/Mapk15	21
GO	BP	GO:0060041	retina development in camera-type eye	33/2267	145/17047	0.00122071	0.0399007	ENSMUSG00000000530/ENSMUSG00000001289/ENSMUSG00000018160/ENSMUSG00000019971/ENSMUSG00000020212/ENSMUSG00000021013/ENSMUSG00000021730/ENSMUSG00000021983/ENSMUSG00000023978/ENSMUSG00000024842/ENSMUSG00000025900/ENSMUSG00000026154/ENSMUSG00000026609/ENSMUSG00000028977/ENSMUSG00000029064/ENSMUSG00000029086/ENSMUSG00000029491/ENSMUSG00000029863/ENSMUSG00000030324/ENSMUSG00000030978/ENSMUSG00000031028/…	Acvrl1/Pfdn5/Med1/Cep290/Mdm1/Ttc8/Hcn1/Atp8a2/Prph2/Cabp4/Rp1/1110058L19Rik/Ush2a/Casz1/Gnb1/Prom1/Pde6b/Casp2/Rho/Rrm1/Tub/Rs1/Nr2e3/Gnat1/Tulp1/Tbc1d32/Crx/Papd4/Rp1l1/Rpgrip1/Max/Slc17a7/Rom1	33
GO	MF	GO:0017069	snRNA binding	2282-12-01	36/17092	0.00175247	0.0399173	ENSMUSG00000008373/ENSMUSG00000010554/ENSMUSG00000011960/ENSMUSG00000018199/ENSMUSG00000018974/ENSMUSG00000020850/ENSMUSG00000020929/ENSMUSG00000024604/ENSMUSG00000028688/ENSMUSG00000039630/ENSMUSG00000043372/ENSMUSG00000066148	Prpf31/Mettl16/Ccnt1/Trove2/Sart3/Prpf8/Eftud2/Rbm22/Toe1/Hnrnpu/Hexim2/Prpf4	12
GO	MF	GO:0016411	acylglycerol O-acyltransferase activity	2282-07-01	15/17092	0.00180621	0.0402472	ENSMUSG00000001211/ENSMUSG00000022555/ENSMUSG00000026623/ENSMUSG00000031467/ENSMUSG00000033192/ENSMUSG00000041653/ENSMUSG00000054469	Agpat3/Dgat1/Lpgat1/Agpat5/Lpcat2/Pnpla3/Lclat1	7
GO	BP	GO:0006342	chromatin silencing	20/2267	74/17047	0.00124877	0.0405777	ENSMUSG00000000028/ENSMUSG00000006920/ENSMUSG00000015697/ENSMUSG00000020063/ENSMUSG00000020661/ENSMUSG00000021179/ENSMUSG00000023977/ENSMUSG00000024054/ENSMUSG00000024764/ENSMUSG00000026739/ENSMUSG00000030213/ENSMUSG00000031393/ENSMUSG00000036181/ENSMUSG00000038025/ENSMUSG00000039231/ENSMUSG00000042557/ENSMUSG00000048154/ENSMUSG00000051627/ENSMUSG00000052812/ENSMUSG00000068391	Cdc45/Ezh1/Setdb1/Sirt1/Dnmt3a/Nrde2/Ubr2/Smchd1/Naa40/Bmi1/Atf7ip/Mecp2/Hist1h1c/Phf2/Suv39h1/Sin3a/Kmt2d/Hist1h1e/Atad2b/Chrac1	20
GO	BP	GO:0010212	response to ionizing radiation	34/2267	151/17047	0.00126327	0.0408089	ENSMUSG00000003068/ENSMUSG00000017146/ENSMUSG00000020063/ENSMUSG00000020381/ENSMUSG00000020413/ENSMUSG00000020661/ENSMUSG00000020694/ENSMUSG00000021694/ENSMUSG00000022141/ENSMUSG00000022248/ENSMUSG00000022471/ENSMUSG00000022556/ENSMUSG00000024151/ENSMUSG00000027323/ENSMUSG00000027699/ENSMUSG00000028886/ENSMUSG00000029238/ENSMUSG00000030346/ENSMUSG00000030528/ENSMUSG00000030978/ENSMUSG00000031201/…	Stk11/Brca1/Sirt1/3010026O09Rik/Hus1/Dnmt3a/Tlk2/Ercc8/Nipbl/Rad1/Xrcc6/Hsf1/Msh2/Rad51/Ect2/Eya3/Clock/Rad51ap1/Blm/Rrm1/Brcc3/Rfwd3/Xrra1/Fam175a/Fignl1/Gadd45a/9630033F20Rik/Rad9b/Trp53bp1/Dcun1d3/Lig4/Trp53/Clk2/Rad54b	34
GO	BP	GO:0006310	DNA recombination	52/2267	258/17047	0.00129159	0.0414811	ENSMUSG00000000028/ENSMUSG00000002052/ENSMUSG00000007646/ENSMUSG00000014850/ENSMUSG00000015971/ENSMUSG00000017146/ENSMUSG00000017485/ENSMUSG00000020079/ENSMUSG00000020381/ENSMUSG00000020413/ENSMUSG00000020752/ENSMUSG00000022141/ENSMUSG00000022797/ENSMUSG00000023977/ENSMUSG00000024054/ENSMUSG00000024151/ENSMUSG00000027323/ENSMUSG00000027353/ENSMUSG00000028820/ENSMUSG00000028884/ENSMUSG00000029283/…	Cdc45/Supt6/Rad51c/Msh3/Actr8/Brca1/Top2b/Supv3l1/3010026O09Rik/Hus1/Recql5/Nipbl/Tfrc/Ubr2/Smchd1/Msh2/Rad51/Mcm8/Sfpq/Rpa2/Cdc7/Aplf/Recql/Rad51ap1/Blm/Gins4/Mre11a/Mlh1/Cep63/Exd2/Rfwd3/Polq/Helq/Fignl1/Hist1h1c/Mcrs1/Rtel1/Nsmce4a/Wrap53/Trp53bp1/Setd2/Lig4/Swsap1/Hist1h1e/Prdm9/Hmgb2/Rad51b/Slx1b/Hdac10/Zfyve26/Rad54b/Tnfsf13	52
GO	BP	GO:0071166	ribonucleoprotein complex localization	18/2267	64/17047	0.00130943	0.0418108	ENSMUSG00000001017/ENSMUSG00000002052/ENSMUSG00000008373/ENSMUSG00000020739/ENSMUSG00000022142/ENSMUSG00000024384/ENSMUSG00000026812/ENSMUSG00000034274/ENSMUSG00000035851/ENSMUSG00000037475/ENSMUSG00000039509/ENSMUSG00000040667/ENSMUSG00000041815/ENSMUSG00000042650/ENSMUSG00000044791/ENSMUSG00000051329/ENSMUSG00000052798/ENSMUSG00000074102	Chtop/Supt6/Prpf31/Nup85/Nup155/Iws1/Tsc1/Thoc5/Ythdc1/Thoc2/Nup133/Nup88/Poldip3/Alkbh5/Setd2/Nup160/Nup107/Rbm15b	18
GO	BP	GO:0051054	positive regulation of DNA metabolic process	49/2267	240/17047	0.00131708	0.0418135	ENSMUSG00000002948/ENSMUSG00000010154/ENSMUSG00000010517/ENSMUSG00000014426/ENSMUSG00000014907/ENSMUSG00000015697/ENSMUSG00000017146/ENSMUSG00000017485/ENSMUSG00000020063/ENSMUSG00000020381/ENSMUSG00000021270/ENSMUSG00000021694/ENSMUSG00000021972/ENSMUSG00000022018/ENSMUSG00000022234/ENSMUSG00000022556/ENSMUSG00000022710/ENSMUSG00000022797/ENSMUSG00000024054/ENSMUSG00000024151/ENSMUSG00000024811/…	Map2k7/Spire2/Faf1/Map3k4/Naf1/Setdb1/Brca1/Top2b/Sirt1/3010026O09Rik/Hsp90aa1/Ercc8/Hmbox1/Rgcc/Cct5/Hsf1/Usp7/Tfrc/Smchd1/Msh2/Tnks2/Rad51/Eya3/Ppargc1a/Cdc7/Mapkapk5/Aplf/Atf7ip/Blm/Brcc3/Mecp2/Mre11a/Mlh1/Fam175a/Ddx11/Otud4/9630033F20Rik/Rtel1/Ciz1/Wrap53/Trp53bp1/Hnrnpa1/Chtf8/Prdm9/Camk2d/Slx1b/Hdac10/Mapk15/Tnfsf13	49
GO	MF	GO:0140098	catalytic activity, acting on RNA	60/2282	311/17092	0.00192607	0.0420047	ENSMUSG00000003660/ENSMUSG00000003808/ENSMUSG00000004127/ENSMUSG00000005682/ENSMUSG00000007603/ENSMUSG00000010554/ENSMUSG00000016018/ENSMUSG00000017264/ENSMUSG00000019039/ENSMUSG00000020079/ENSMUSG00000020362/ENSMUSG00000020549/ENSMUSG00000020719/ENSMUSG00000020850/ENSMUSG00000021418/ENSMUSG00000021420/ENSMUSG00000021932/ENSMUSG00000022160/ENSMUSG00000022704/ENSMUSG00000024422/ENSMUSG00000025280/…	Snrnp200/Farsa/Trmt10a/Pan2/Dus3l/Mettl16/Skiv2l2/Exosc10/Dalrd3/Supv3l1/Cnot6/Elac2/Ddx5/Prpf8/Rpp40/Fars2/Rnaseh2b/Mettl3/Qtrtd1/Dhx16/Polr3a/Farsb/Angel2/Dars2/Trdmt1/Polr3f/Pet112/Polr3gl/Mettl14/Toe1/Ago3/Trmt44/Pan3/Rbmx2/Xrn1/Dhx30/Qars/Ybey/Dis3/Eri3/Rpap1/Cnot6l/Dhx8/Cnot1/Ago2/Trmt12/Dhx38/Vars2/Pcif1/Alkbh3/Dicer1/Papd4/Tsen2/Alkbh5/Pde12/Trmt10c/Mars2/Upf1/Ptrh2/Lcmt2	60
GO	CC	GO:0034451	centriolar satellite	2279-10-01	29/17165	0.00302357	0.0438418	ENSMUSG00000006464/ENSMUSG00000019971/ENSMUSG00000022677/ENSMUSG00000022833/ENSMUSG00000026504/ENSMUSG00000028256/ENSMUSG00000035919/ENSMUSG00000037234/ENSMUSG00000046753/ENSMUSG00000063145	Bbs1/Cep290/Fopnl/Ccdc14/Sdccag8/Odf2l/Bbs9/Hook3/Ccdc66/Bbs5	10
GO	CC	GO:0005684	U2-type spliceosomal complex	21/2279	85/17165	0.00313413	0.0445538	ENSMUSG00000001767/ENSMUSG00000008373/ENSMUSG00000015748/ENSMUSG00000020850/ENSMUSG00000020929/ENSMUSG00000022023/ENSMUSG00000024422/ENSMUSG00000024604/ENSMUSG00000027014/ENSMUSG00000029345/ENSMUSG00000031107/ENSMUSG00000034931/ENSMUSG00000035125/ENSMUSG00000036537/ENSMUSG00000040383/ENSMUSG00000050213/ENSMUSG00000057130/ENSMUSG00000061136/ENSMUSG00000066148/ENSMUSG00000078676/ENSMUSG00000098134	Crnkl1/Prpf31/Prpf3/Prpf8/Eftud2/Wbp4/Dhx16/Rbm22/Cwc22/Tfip11/Rbmx2/Dhx8/Gcfc2/Rnf113a1/Aqr/Snip1/Txnl4a/Prpf40a/Prpf4/Casc3/Rnf113a2	21
GO	BP	GO:0060632	regulation of microtubule-based movement	2267-11-01	31/17047	0.00147248	0.04648	ENSMUSG00000003354/ENSMUSG00000006464/ENSMUSG00000015222/ENSMUSG00000017686/ENSMUSG00000027274/ENSMUSG00000031393/ENSMUSG00000031447/ENSMUSG00000031755/ENSMUSG00000031796/ENSMUSG00000031831/ENSMUSG00000034848	Ccdc65/Bbs1/Map2/Rhot1/Mkks/Mecp2/Lamp1/Bbs2/Gtl3/Dnaaf1/Ttc21b	11
GO	BP	GO:0000018	regulation of DNA recombination	23/2267	91/17047	0.00151488	0.0475465	ENSMUSG00000002052/ENSMUSG00000014850/ENSMUSG00000020381/ENSMUSG00000020752/ENSMUSG00000022797/ENSMUSG00000024054/ENSMUSG00000024151/ENSMUSG00000027323/ENSMUSG00000028884/ENSMUSG00000030051/ENSMUSG00000030346/ENSMUSG00000030528/ENSMUSG00000032498/ENSMUSG00000034206/ENSMUSG00000035455/ENSMUSG00000036181/ENSMUSG00000038685/ENSMUSG00000041346/ENSMUSG00000043909/ENSMUSG00000044791/ENSMUSG00000051627/…	Supt6/Msh3/3010026O09Rik/Recql5/Tfrc/Smchd1/Msh2/Rad51/Rpa2/Aplf/Rad51ap1/Blm/Mlh1/Polq/Fignl1/Hist1h1c/Rtel1/Wrap53/Trp53bp1/Setd2/Hist1h1e/Prdm9/Tnfsf13	23
GO	MF	GO:0002039	p53 binding	19/2282	72/17092	0.00231476	0.0489848	ENSMUSG00000000552/ENSMUSG00000003068/ENSMUSG00000020063/ENSMUSG00000020696/ENSMUSG00000022710/ENSMUSG00000027016/ENSMUSG00000028639/ENSMUSG00000029454/ENSMUSG00000029833/ENSMUSG00000030528/ENSMUSG00000031826/ENSMUSG00000033596/ENSMUSG00000036893/ENSMUSG00000038069/ENSMUSG00000041560/ENSMUSG00000043909/ENSMUSG00000053754/ENSMUSG00000055024/ENSMUSG00000059552	Zfp385a/Stk11/Sirt1/Rffl/Usp7/Zfp385b/Ybx1/Mapkapk5/Trim24/Blm/Usp10/Rfwd3/Ehmt1/Cdkn2aip/Gltscr2/Trp53bp1/Chd8/Ep300/Trp53	19
GO	MF	GO:0004407	histone deacetylase activity	2282-10-01	28/17092	0.00234171	0.0489848	ENSMUSG00000004698/ENSMUSG00000015149/ENSMUSG00000020063/ENSMUSG00000020519/ENSMUSG00000042557/ENSMUSG00000042570/ENSMUSG00000062906/ENSMUSG00000066900/ENSMUSG00000071646/ENSMUSG00000080268	Hdac9/Sirt2/Sirt1/Sap30l/Sin3a/Mier2/Hdac10/Suds3/Mta2/Brms1	10
GO	BP	GO:1901990	regulation of mitotic cell cycle phase transition	49/2267	242/17047	0.00158242	0.0493857	ENSMUSG00000000028/ENSMUSG00000004364/ENSMUSG00000007646/ENSMUSG00000010342/ENSMUSG00000017146/ENSMUSG00000017421/ENSMUSG00000020381/ENSMUSG00000020413/ENSMUSG00000021635/ENSMUSG00000021932/ENSMUSG00000022018/ENSMUSG00000022314/ENSMUSG00000022855/ENSMUSG00000022960/ENSMUSG00000024382/ENSMUSG00000024590/ENSMUSG00000024740/ENSMUSG00000025925/ENSMUSG00000026361/ENSMUSG00000026605/ENSMUSG00000028884/…	Cdc45/Cul3/Rad51c/Tex14/Brca1/Zfp207/3010026O09Rik/Hus1/Rad17/Rnaseh2b/Rgcc/Rad21/Senp2/Donson/Ercc3/Lmnb1/Ddb1/Terf1/Cdc73/Cenpf/Rpa2/Kmt2e/Miip/Cdc7/Casp2/Mad2l1/Blm/Anapc15/Mecp2/Cul4a/Rbl2/Nae1/Mre11a/Rfwd3/Mad2l1bp/Cdk5rap2/Gltscr2/Sin3a/Zfp830/Gigyf2/Dcun1d3/Pbx1/Camk2d/Ankrd17/Rad51b/Usp47/Trp53/Taok2/Taok3	49
GO	BP	GO:0006289	nucleotide-excision repair	15/2267	50/17047	0.00159381	0.0494618	ENSMUSG00000006599/ENSMUSG00000020063/ENSMUSG00000020413/ENSMUSG00000021461/ENSMUSG00000021668/ENSMUSG00000021694/ENSMUSG00000022710/ENSMUSG00000024382/ENSMUSG00000028884/ENSMUSG00000031347/ENSMUSG00000031446/ENSMUSG00000035121/ENSMUSG00000038644/ENSMUSG00000049717/ENSMUSG00000059552	Gtf2h1/Sirt1/Hus1/Fancc/Polk/Ercc8/Usp7/Ercc3/Rpa2/Cetn2/Cul4a/Neil2/Pold1/Lig4/Trp53	15
GO	BP	GO:0071103	DNA conformation change	46/2267	224/17047	0.00160664	0.0495813	ENSMUSG00000000028/ENSMUSG00000000934/ENSMUSG00000002814/ENSMUSG00000002835/ENSMUSG00000015971/ENSMUSG00000016559/ENSMUSG00000017485/ENSMUSG00000018974/ENSMUSG00000020079/ENSMUSG00000020196/ENSMUSG00000020752/ENSMUSG00000022141/ENSMUSG00000022185/ENSMUSG00000022471/ENSMUSG00000024045/ENSMUSG00000024054/ENSMUSG00000024382/ENSMUSG00000027284/ENSMUSG00000027323/ENSMUSG00000028089/ENSMUSG00000028693/…	Cdc45/Top1mt/Top3a/Chaf1a/Actr8/H3f3b/Top2b/Sart3/Supv3l1/Cabin1/Recql5/Nipbl/Acin1/Xrcc6/Akap8/Smchd1/Ercc3/Cdan1/Rad51/Chd1l/Nasp/Recql/Blm/Kat6a/Gins4/Mre11a/Dhx30/Smc4/Ncapd3/Helq/Ddx11/Hist1h1c/Rtel1/Suv39h1/Ubn1/Mterf1a/Wapal/Hist1h2be/Hist1h1e/Prdm9/Chd8/Hmgb2/Trp53/Hist1h4c/Mta2/Hist4h4	46
GO	BP	GO:0044773	mitotic DNA damage checkpoint	16/2267	55/17047	0.00161834	0.0496651	ENSMUSG00000020381/ENSMUSG00000020413/ENSMUSG00000022960/ENSMUSG00000024151/ENSMUSG00000028884/ENSMUSG00000029863/ENSMUSG00000030528/ENSMUSG00000031928/ENSMUSG00000033596/ENSMUSG00000038569/ENSMUSG00000041560/ENSMUSG00000046010/ENSMUSG00000048000/ENSMUSG00000059552/ENSMUSG00000059981/ENSMUSG00000061288	3010026O09Rik/Hus1/Donson/Msh2/Rpa2/Casp2/Blm/Mre11a/Rfwd3/Rad9b/Gltscr2/Zfp830/Gigyf2/Trp53/Taok2/Taok3	16
