# Supplementary material for: Homeostatic plasticity in the retina is associated with maintenance of night vision during retinal degenerative disease
Source: eLife. 2020 Sep 22;9:e59422. doi: 10.7554/eLife.59422 (PMC7529457; doi:10.7554/eLife.59422)
Supplement: Supplementary file 6. [file elife-59422-supp6.xls]

## Sheet: HetvsWT_up_GOenrich_significant
Enrich_Category	Category	GOID	Description	GeneRatio	BgRatio	pvalue	padj	geneID	geneName	Count
GO	BP	GO:0050808	synapse organization	157/2453	436/17047	3.37297e-30	2.00219e-26	ENSMUSG00000000416/ENSMUSG00000000632/ENSMUSG00000000881/ENSMUSG00000001507/ENSMUSG00000002489/ENSMUSG00000002985/ENSMUSG00000003279/ENSMUSG00000003352/ENSMUSG00000005958/ENSMUSG00000006435/ENSMUSG00000006699/ENSMUSG00000007653/ENSMUSG00000010066/ENSMUSG00000010803/ENSMUSG00000013033/ENSMUSG00000015829/ENSMUSG00000016382/ENSMUSG00000017314/ENSMUSG00000017412/ENSMUSG00000019820/ENSMUSG00000019843/…	Cttnbp2/Sez6/Dlg3/Itga3/Tiam1/Apoe/Dlgap1/Cacnb3/Ephb3/Neurl1a/Cdc42/Gabrb2/Cacna2d2/Gabra1/Lphn1/Tnr/Pls3/Mpp2/Cacnb4/Utrn/Fyn/Gabrg2/Nrcam/Asic2/Sema4d/Drd1a/Dlg5/Arf4/Shank3/Ache/Trem2/Nrxn1/C3/Cdh2/Afg3l2/Cbln2/Farp1/Arhgef9/Nrp1/Nrp2/Epha4/Rab29/Dab2ip/Grin1/Pfn2/Efna1/Ntrk1/Lphn2/Sdcbp/Epha7/Ptprd/Nfia/Lrp8/Ephb2/Epha5/Rest/Ptn/Add2/Grip2/Plxnd1/Erc1/Ptpro/Camk1/Atp2b2/Caprin2/Cyfip1/Cttn/G…	157
GO	CC	GO:0097060	synaptic membrane	160/2474	473/17165	3.57992e-27	2.39138e-24	ENSMUSG00000000263/ENSMUSG00000000326/ENSMUSG00000000617/ENSMUSG00000000627/ENSMUSG00000000881/ENSMUSG00000000915/ENSMUSG00000001507/ENSMUSG00000001985/ENSMUSG00000001986/ENSMUSG00000002489/ENSMUSG00000003153/ENSMUSG00000003279/ENSMUSG00000003378/ENSMUSG00000003872/ENSMUSG00000004319/ENSMUSG00000005338/ENSMUSG00000006435/ENSMUSG00000007653/ENSMUSG00000009681/ENSMUSG00000010086/ENSMUSG00000010803/…	Glra1/Comt/Grm6/Sema4f/Dlg3/Hip1r/Itga3/Grik3/Gria3/Tiam1/Slc2a3/Dlgap1/Grik5/Lin7b/Clcn3/Cadm3/Neurl1a/Gabrb2/Bcr/Rnf112/Gabra1/Grid2ip/Lphn1/Aph1a/Cacna1d/Cntnap1/Mpp2/Cadps2/Arrb1/Slc6a8/Utrn/Lin7a/Atp2b1/Pdlim4/Gabrg2/Gria1/Nrcam/Cacng4/Akap5/Drd1a/Dlg5/Sept3/Shisa9/Shank3/Pvrl3/Grik1/Faim2/Ache/Nrxn1/Cdh2/Anxa1/Syt7/Apba1/Fosl1/Farp1/Arhgef9/Nrp1/Homer2/Gria4/Adam23/Nrp2/Epha4/Atp2b4/Olfm1/G…	160
GO	CC	GO:0098978	glutamatergic synapse	149/2474	465/17165	1.07121e-22	3.57783e-20	ENSMUSG00000000409/ENSMUSG00000000416/ENSMUSG00000000881/ENSMUSG00000001847/ENSMUSG00000001985/ENSMUSG00000001986/ENSMUSG00000002489/ENSMUSG00000002985/ENSMUSG00000003153/ENSMUSG00000003279/ENSMUSG00000003378/ENSMUSG00000004040/ENSMUSG00000004113/ENSMUSG00000004319/ENSMUSG00000004815/ENSMUSG00000005483/ENSMUSG00000007783/ENSMUSG00000009681/ENSMUSG00000013033/ENSMUSG00000015829/ENSMUSG00000016933/…	Lck/Cttnbp2/Dlg3/Rac1/Grik3/Gria3/Tiam1/Apoe/Slc2a3/Dlgap1/Grik5/Stat3/Cacna1b/Clcn3/Dgkq/Dnajb1/Cpt1c/Bcr/Lphn1/Tnr/Plcg1/Mpp2/Cacnb4/Abr/Cadps2/Slc6a8/Fyn/Atp2b1/Gabrg2/Gria1/Nrcam/Prkar1a/Cacng4/Akap5/Drd1a/Erbb2ip/Arf4/Shisa9/Shank3/Nrxn1/Syt4/Cdh2/Cbln2/Syt7/Apba1/Rela/Gpr123/Farp1/Nrp1/Homer2/Gria4/Adam23/Nrp2/Epha4/Atp2b4/Olfm1/Grin1/Src/Pfn2/Gucy1b3/Arhgef2/Lphn2/Epha7/Ptprd/Elavl4/Ephb2/…	149
GO	BP	GO:0061564	axon development	149/2453	458/17047	1.65851e-23	4.92245e-20	ENSMUSG00000000247/ENSMUSG00000000627/ENSMUSG00000000861/ENSMUSG00000001227/ENSMUSG00000001761/ENSMUSG00000001847/ENSMUSG00000002489/ENSMUSG00000002633/ENSMUSG00000002985/ENSMUSG00000003534/ENSMUSG00000005958/ENSMUSG00000006445/ENSMUSG00000006782/ENSMUSG00000007989/ENSMUSG00000008575/ENSMUSG00000015342/ENSMUSG00000015829/ENSMUSG00000017724/ENSMUSG00000017929/ENSMUSG00000019647/ENSMUSG00000019803/…	Lhx2/Sema4f/Bcl11a/Sema6b/Smo/Rac1/Tiam1/Shh/Apoe/Ddr1/Ephb3/Epha2/Cnp/Fzd3/Nfib/Xk/Tnr/Etv4/B4galt5/Sema6a/Nr2e1/Rab21/Cobl/Adarb1/Kremen1/Nrcam/Nin/Evl/Gli3/Sema4d/Otx2/Trio/Boc/Robo1/Ache/Tnfrsf12a/Tnfrsf21/Vegfa/Cdh2/Afg3l2/Csf1r/Sema4g/Nrp1/Nrp2/Fn1/Epha4/Vangl2/Plxna2/Kif5c/Nr4a2/Olfm1/Zeb2/Notch1/Lhx3/Grin1/Itga4/Pax6/Map1a/Ttl/Efna1/Ntrk1/Epha7/Dab1/Dock7/Ephb2/Sema3c/Stmn1/Epha10/Epha5/A…	149
GO	CC	GO:0045211	postsynaptic membrane	116/2474	343/17165	5.58664e-20	1.24396e-17	ENSMUSG00000000263/ENSMUSG00000000326/ENSMUSG00000000617/ENSMUSG00000000627/ENSMUSG00000000881/ENSMUSG00000001985/ENSMUSG00000001986/ENSMUSG00000002489/ENSMUSG00000003279/ENSMUSG00000003378/ENSMUSG00000003872/ENSMUSG00000004319/ENSMUSG00000006435/ENSMUSG00000007653/ENSMUSG00000009681/ENSMUSG00000010086/ENSMUSG00000010803/ENSMUSG00000010825/ENSMUSG00000017314/ENSMUSG00000017978/ENSMUSG00000018909/…	Glra1/Comt/Grm6/Sema4f/Dlg3/Grik3/Gria3/Tiam1/Dlgap1/Grik5/Lin7b/Clcn3/Neurl1a/Gabrb2/Bcr/Rnf112/Gabra1/Grid2ip/Mpp2/Cadps2/Arrb1/Slc6a8/Utrn/Lin7a/Pdlim4/Gabrg2/Gria1/Nrcam/Cacng4/Drd1a/Dlg5/Shisa9/Shank3/Pvrl3/Grik1/Faim2/Ache/Cdh2/Farp1/Arhgef9/Nrp1/Homer2/Gria4/Nrp2/Epha4/Grin1/Lphn2/Epha7/Slc6a9/Ephb2/Tmub1/Grip2/Ptpro/Atp2b2/Slc6a11/Slc6a1/Psd3/Magee1/Nlgn3/Ank1/Htr3a/Clstn2/Chrm1/Ptprf/Gab…	116
GO	BP	GO:0007409	axonogenesis	134/2453	418/17047	1.32439e-20	2.62053e-17	ENSMUSG00000000247/ENSMUSG00000000627/ENSMUSG00000000861/ENSMUSG00000001227/ENSMUSG00000001761/ENSMUSG00000001847/ENSMUSG00000002489/ENSMUSG00000002633/ENSMUSG00000002985/ENSMUSG00000005958/ENSMUSG00000006445/ENSMUSG00000006782/ENSMUSG00000007989/ENSMUSG00000008575/ENSMUSG00000015342/ENSMUSG00000015829/ENSMUSG00000017724/ENSMUSG00000017929/ENSMUSG00000019647/ENSMUSG00000019803/ENSMUSG00000020132/…	Lhx2/Sema4f/Bcl11a/Sema6b/Smo/Rac1/Tiam1/Shh/Apoe/Ephb3/Epha2/Cnp/Fzd3/Nfib/Xk/Tnr/Etv4/B4galt5/Sema6a/Nr2e1/Rab21/Cobl/Adarb1/Nrcam/Nin/Evl/Gli3/Sema4d/Otx2/Trio/Boc/Robo1/Ache/Tnfrsf12a/Vegfa/Cdh2/Afg3l2/Csf1r/Sema4g/Nrp1/Nrp2/Fn1/Epha4/Vangl2/Plxna2/Kif5c/Nr4a2/Olfm1/Zeb2/Notch1/Lhx3/Grin1/Itga4/Pax6/Map1a/Ttl/Efna1/Ntrk1/Epha7/Dab1/Dock7/Ephb2/Sema3c/Stmn1/Epha10/Epha5/Auts2/Plxna4/Chl1/Plxna…	134
GO	BP	GO:0098742	cell-cell adhesion via plasma-membrane adhesion molecules	88/2453	224/17047	2.82743e-20	4.1959e-17	ENSMUSG00000001034/ENSMUSG00000001123/ENSMUSG00000005338/ENSMUSG00000006411/ENSMUSG00000013033/ENSMUSG00000016150/ENSMUSG00000020598/ENSMUSG00000022178/ENSMUSG00000022656/ENSMUSG00000022790/ENSMUSG00000022883/ENSMUSG00000024109/ENSMUSG00000024304/ENSMUSG00000026312/ENSMUSG00000026836/ENSMUSG00000027962/ENSMUSG00000028399/ENSMUSG00000028519/ENSMUSG00000029108/ENSMUSG00000031119/ENSMUSG00000031673/…	Mapk7/Lgals9/Cadm3/Pvrl4/Lphn1/Tenm1/Nrcam/Ajuba/Pvrl3/Igsf11/Robo1/Nrxn1/Cdh2/Cdh7/Acvr1/Vcam1/Ptprd/Dab1/Pcdh7/Gpc4/Cdh11/Cx3cl1/Cdh13/Pvrl1/Kirrel3/Mcam/Tgfbr2/Clstn2/Ptprm/Ptprf/Igsf9b/Mdga2/Pcdh17/Cdhr3/Prtg/Cdh8/Plxnb2/Dchs1/Lrfn3/Lphn3/Tgfb2/Sdk1/Magi2/Pvr/Igsf21/Sdk2/Mbp/Pcdhb19/Pcdhb12/Pcdhb21/Ccdc141/Pcdhb14/Pcdhb7/Epcam/Pcdhb3/Pcdhb10/Pcdhb20/Pcdhb17/Pcdhb15/Lrrc4b/Cd24a/Pcdhb13/Pcdhb1…	88
GO	CC	GO:0099572	postsynaptic specialization	130/2474	412/17165	2.66699e-19	4.45388e-17	ENSMUSG00000000263/ENSMUSG00000000409/ENSMUSG00000000627/ENSMUSG00000000861/ENSMUSG00000000881/ENSMUSG00000000915/ENSMUSG00000001761/ENSMUSG00000001986/ENSMUSG00000002489/ENSMUSG00000003279/ENSMUSG00000003378/ENSMUSG00000003872/ENSMUSG00000004040/ENSMUSG00000005483/ENSMUSG00000006435/ENSMUSG00000007653/ENSMUSG00000009681/ENSMUSG00000010086/ENSMUSG00000010803/ENSMUSG00000013033/ENSMUSG00000017314/…	Glra1/Lck/Sema4f/Bcl11a/Dlg3/Hip1r/Smo/Gria3/Tiam1/Dlgap1/Grik5/Lin7b/Stat3/Dnajb1/Neurl1a/Gabrb2/Bcr/Rnf112/Gabra1/Lphn1/Mpp2/Abr/Arrb1/Fyn/Lin7a/Gabrg2/Gria1/Nrcam/Cacng4/Akap5/Erbb2ip/Dlg5/Camk2g/Shisa9/Mapk8ip2/Shank3/Pvrl3/Igsf11/Epb4.1l3/Cdh2/Gpr123/Arhgef9/Homer2/Gria4/Il1r1/Epha4/Grin1/Map1a/Src/Arhgef2/Epha7/Dab1/Pde4b/Slc6a9/Lrp8/Sorcs2/P2rx4/Exoc4/Add2/Grip2/Itpr1/Erc1/Ptpro/Camk1/Atp2…	130
GO	MF	GO:0050839	cell adhesion molecule binding	87/2478	220/17092	4.59807e-20	4.87396e-17	ENSMUSG00000000290/ENSMUSG00000000392/ENSMUSG00000000957/ENSMUSG00000001507/ENSMUSG00000001930/ENSMUSG00000004266/ENSMUSG00000006411/ENSMUSG00000009073/ENSMUSG00000009687/ENSMUSG00000013033/ENSMUSG00000015533/ENSMUSG00000015647/ENSMUSG00000015829/ENSMUSG00000016150/ENSMUSG00000016493/ENSMUSG00000017466/ENSMUSG00000019820/ENSMUSG00000019997/ENSMUSG00000020122/ENSMUSG00000020758/ENSMUSG00000020932/…	Itgb2/Fap/Mmp14/Itga3/Vwf/Ptpn6/Pvrl4/Nf2/Fxyd5/Lphn1/Itga2/Lama5/Tnr/Tenm1/Cd46/Timp2/Utrn/Ctgf/Egfr/Itgb4/Gfap/Akap5/Syk/Thbs4/Anxa7/Lcp1/Olfm4/Myh9/Glycam1/Pvrl3/Nrxn1/Cdh2/Fermt3/Itgb8/Cd151/Fn1/Cdh7/Itga4/Itgav/Src/Vcam1/Adam15/Cyr61/Sdcbp/Ptprd/Ppap2b/P2rx4/Ptn/Cd9/Msn/Nlgn3/Fgfr1/Cdh11/Cx3cl1/Cdh13/Jam3/Pvrl1/Ptprm/Ptprf/Nrxn2/Ctnnd1/Isg15/Cdh8/Fgf2/Icam1/Cd81/Ctnnal1/Thbs1/Pvr/Igsf21/Lyn/…	87
GO	CC	GO:0098984	neuron to neuron synapse	128/2474	405/17165	4.35605e-19	5.81968e-17	ENSMUSG00000000627/ENSMUSG00000000861/ENSMUSG00000000881/ENSMUSG00000000915/ENSMUSG00000001761/ENSMUSG00000001986/ENSMUSG00000002489/ENSMUSG00000003279/ENSMUSG00000003378/ENSMUSG00000003872/ENSMUSG00000004040/ENSMUSG00000005483/ENSMUSG00000006435/ENSMUSG00000009681/ENSMUSG00000010086/ENSMUSG00000013033/ENSMUSG00000015829/ENSMUSG00000017314/ENSMUSG00000017631/ENSMUSG00000018909/ENSMUSG00000019843/…	Sema4f/Bcl11a/Dlg3/Hip1r/Smo/Gria3/Tiam1/Dlgap1/Grik5/Lin7b/Stat3/Dnajb1/Neurl1a/Bcr/Rnf112/Lphn1/Tnr/Mpp2/Abr/Arrb1/Fyn/Lin7a/Gria1/Nrcam/Cacng4/Akap5/Dlg5/Camk2g/Shisa9/Mapk8ip2/Shank3/Pvrl3/Igsf11/Epb4.1l3/Cdh2/Syt7/Gpr123/Arhgef9/Homer2/Gria4/Il1r1/Epha4/Grin1/Map1a/Src/Arhgef2/Epha7/Ptprd/Dab1/Pde4b/Slc6a9/Lrp8/Sorcs2/P2rx4/Exoc4/Add2/Grip2/Itpr1/Erc1/Ptpro/Camk1/Atp2b2/Psd3/Cdkl5/Sorbs2/Mt3…	128
GO	BP	GO:0022604	regulation of cell morphogenesis	148/2453	489/17047	5.55547e-20	6.59545e-17	ENSMUSG00000000627/ENSMUSG00000000861/ENSMUSG00000000982/ENSMUSG00000001227/ENSMUSG00000001847/ENSMUSG00000002233/ENSMUSG00000002489/ENSMUSG00000002985/ENSMUSG00000003283/ENSMUSG00000005087/ENSMUSG00000005958/ENSMUSG00000006219/ENSMUSG00000006699/ENSMUSG00000015342/ENSMUSG00000015745/ENSMUSG00000015829/ENSMUSG00000017144/ENSMUSG00000019647/ENSMUSG00000019803/ENSMUSG00000019843/ENSMUSG00000019970/…	Sema4f/Bcl11a/Ccl3/Sema6b/Rac1/Rhoc/Tiam1/Apoe/Hck/Cd44/Ephb3/Fblim1/Cdc42/Xk/Plekho1/Tnr/Rnd3/Sema6a/Nr2e1/Fyn/Sgk1/Rab21/1810043G02Rik/Slc9a3r1/Coch/Akap5/Nin/Sema4d/Rhobtb3/Hexb/Anxa7/Olfm4/Cpne6/Myo10/Enpp2/Parvb/Myh9/Shank3/Mfi2/Robo1/St6gal1/Ache/Tnfrsf12a/Vegfa/Epb4.1l3/Rhoq/Syt4/Cdh2/Csf1r/Anxa1/Arhgdia/Sema4g/Limd1/Nrp1/Fn1/Epha4/Syt2/Plxna2/Ermn/Olfm1/Zeb2/Grin1/Ttl/Src/Efna1/Sh3d19/Eph…	148
GO	CC	GO:0099240	intrinsic component of synaptic membrane	85/2474	222/17165	9.49226e-19	1.0568e-16	ENSMUSG00000000263/ENSMUSG00000001986/ENSMUSG00000003153/ENSMUSG00000003378/ENSMUSG00000004319/ENSMUSG00000005338/ENSMUSG00000007653/ENSMUSG00000010803/ENSMUSG00000013033/ENSMUSG00000015750/ENSMUSG00000015968/ENSMUSG00000017314/ENSMUSG00000019558/ENSMUSG00000019943/ENSMUSG00000020436/ENSMUSG00000020524/ENSMUSG00000020598/ENSMUSG00000020723/ENSMUSG00000021478/ENSMUSG00000022494/ENSMUSG00000022656/…	Glra1/Gria3/Slc2a3/Grik5/Clcn3/Cadm3/Gabrb2/Gabra1/Lphn1/Aph1a/Cacna1d/Mpp2/Slc6a8/Atp2b1/Gabrg2/Gria1/Nrcam/Cacng4/Drd1a/Shisa9/Pvrl3/Nrxn1/Cdh2/Syt7/Nrp1/Gria4/Adam23/Nrp2/Epha4/Atp2b4/Grin1/Lphn2/Epha7/Ptprd/Slc6a9/Ephb2/Ptpro/Atp2b2/Slc6a11/Slc6a1/Gpc4/Efnb1/Nlgn3/Gpm6a/Cntnap4/Pvrl1/Htr3a/Clstn2/Chrm1/Ptprf/Gabrb3/Cacna1a/Bai1/Pcdh17/Lrfn3/Kcnj9/Cplx3/Gabbr2/Cacng5/Adam22/Kcnd3/Adora1/D3Bwg0…	85
GO	BP	GO:0042063	gliogenesis	108/2453	313/17047	1.75786e-19	1.73911e-16	ENSMUSG00000000567/ENSMUSG00000000957/ENSMUSG00000000982/ENSMUSG00000001761/ENSMUSG00000001911/ENSMUSG00000002489/ENSMUSG00000002633/ENSMUSG00000004040/ENSMUSG00000004056/ENSMUSG00000006782/ENSMUSG00000008575/ENSMUSG00000009073/ENSMUSG00000010086/ENSMUSG00000014599/ENSMUSG00000014773/ENSMUSG00000017167/ENSMUSG00000017929/ENSMUSG00000019803/ENSMUSG00000019982/ENSMUSG00000020122/ENSMUSG00000020467/…	Sox9/Mmp14/Ccl3/Smo/Nfix/Tiam1/Shh/Stat3/Akt2/Cnp/Nfib/Nf2/Rnf112/Csf1/Dll1/Cntnap1/B4galt5/Nr2e1/Myb/Egfr/Efemp1/Itgb4/Gfap/Gli3/Ror2/Drd1a/Hexb/Il6st/Bmp4/Clu/Enpp2/Tnfrsf21/Trem2/Sox8/Cdh2/Csf1r/Anxa1/Fas/Il33/Rela/Fn1/Epha4/Serpine2/Dbi/Dab2ip/Notch1/Grin1/Pax6/Spint1/Tlr2/Ppap2b/Dab1/Cdkn2c/Tnfrsf1b/Lrp8/Hdac1/Areg/P2rx4/Dtx1/Exoc4/Ptn/Cd9/Nlgn3/Il34/Mt3/Cx3cl1/Trf/Gpc1/Lif/Ccl12/Tmem98/Myrf…	108
GO	CC	GO:0032279	asymmetric synapse	120/2474	382/17165	9.71983e-18	9.25078e-16	ENSMUSG00000000627/ENSMUSG00000000861/ENSMUSG00000000881/ENSMUSG00000000915/ENSMUSG00000001761/ENSMUSG00000001986/ENSMUSG00000002489/ENSMUSG00000003279/ENSMUSG00000003378/ENSMUSG00000003872/ENSMUSG00000004040/ENSMUSG00000005483/ENSMUSG00000006435/ENSMUSG00000009681/ENSMUSG00000010086/ENSMUSG00000013033/ENSMUSG00000017314/ENSMUSG00000017631/ENSMUSG00000018909/ENSMUSG00000019843/ENSMUSG00000019906/…	Sema4f/Bcl11a/Dlg3/Hip1r/Smo/Gria3/Tiam1/Dlgap1/Grik5/Lin7b/Stat3/Dnajb1/Neurl1a/Bcr/Rnf112/Lphn1/Mpp2/Abr/Arrb1/Fyn/Lin7a/Gria1/Nrcam/Cacng4/Akap5/Dlg5/Camk2g/Shisa9/Mapk8ip2/Shank3/Pvrl3/Igsf11/Epb4.1l3/Cdh2/Gpr123/Arhgef9/Homer2/Gria4/Il1r1/Epha4/Grin1/Map1a/Src/Arhgef2/Epha7/Dab1/Pde4b/Slc6a9/Lrp8/Sorcs2/P2rx4/Exoc4/Add2/Grip2/Itpr1/Erc1/Ptpro/Camk1/Atp2b2/Psd3/Cdkl5/Sorbs2/Mt3/Clstn2/Myd88/C…	120
GO	CC	GO:0014069	postsynaptic density	119/2474	378/17165	1.10788e-17	9.25078e-16	ENSMUSG00000000627/ENSMUSG00000000861/ENSMUSG00000000881/ENSMUSG00000000915/ENSMUSG00000001761/ENSMUSG00000001986/ENSMUSG00000002489/ENSMUSG00000003279/ENSMUSG00000003378/ENSMUSG00000003872/ENSMUSG00000004040/ENSMUSG00000005483/ENSMUSG00000006435/ENSMUSG00000009681/ENSMUSG00000010086/ENSMUSG00000013033/ENSMUSG00000017314/ENSMUSG00000017631/ENSMUSG00000018909/ENSMUSG00000019843/ENSMUSG00000019906/…	Sema4f/Bcl11a/Dlg3/Hip1r/Smo/Gria3/Tiam1/Dlgap1/Grik5/Lin7b/Stat3/Dnajb1/Neurl1a/Bcr/Rnf112/Lphn1/Mpp2/Abr/Arrb1/Fyn/Lin7a/Gria1/Nrcam/Cacng4/Akap5/Dlg5/Camk2g/Shisa9/Mapk8ip2/Shank3/Pvrl3/Igsf11/Epb4.1l3/Cdh2/Gpr123/Arhgef9/Homer2/Gria4/Il1r1/Epha4/Grin1/Map1a/Src/Arhgef2/Epha7/Dab1/Pde4b/Slc6a9/Lrp8/Sorcs2/P2rx4/Exoc4/Add2/Grip2/Itpr1/Erc1/Ptpro/Camk1/Atp2b2/Psd3/Cdkl5/Sorbs2/Mt3/Clstn2/Myd88/C…	119
GO	CC	GO:0099699	integral component of synaptic membrane	78/2474	204/17165	2.8217e-17	2.09433e-15	ENSMUSG00000000263/ENSMUSG00000001986/ENSMUSG00000003153/ENSMUSG00000003378/ENSMUSG00000004319/ENSMUSG00000005338/ENSMUSG00000007653/ENSMUSG00000010803/ENSMUSG00000013033/ENSMUSG00000015750/ENSMUSG00000015968/ENSMUSG00000019558/ENSMUSG00000019943/ENSMUSG00000020436/ENSMUSG00000020524/ENSMUSG00000020598/ENSMUSG00000020723/ENSMUSG00000021478/ENSMUSG00000022494/ENSMUSG00000022656/ENSMUSG00000024109/…	Glra1/Gria3/Slc2a3/Grik5/Clcn3/Cadm3/Gabrb2/Gabra1/Lphn1/Aph1a/Cacna1d/Slc6a8/Atp2b1/Gabrg2/Gria1/Nrcam/Cacng4/Drd1a/Shisa9/Pvrl3/Nrxn1/Cdh2/Syt7/Nrp1/Gria4/Adam23/Nrp2/Epha4/Atp2b4/Grin1/Lphn2/Epha7/Ptprd/Slc6a9/Ephb2/Ptpro/Atp2b2/Slc6a11/Slc6a1/Efnb1/Nlgn3/Gpm6a/Cntnap4/Pvrl1/Htr3a/Clstn2/Chrm1/Ptprf/Gabrb3/Cacna1a/Bai1/Pcdh17/Lrfn3/Kcnj9/Gabbr2/Cacng5/Adam22/Kcnd3/Adora1/D3Bwg0562e/Chrm3/Lrrc4…	78
GO	CC	GO:0043235	receptor complex	114/2474	363/17165	6.64916e-17	4.44164e-15	ENSMUSG00000000290/ENSMUSG00000000881/ENSMUSG00000001507/ENSMUSG00000001985/ENSMUSG00000001986/ENSMUSG00000002602/ENSMUSG00000003378/ENSMUSG00000003534/ENSMUSG00000004266/ENSMUSG00000005087/ENSMUSG00000005958/ENSMUSG00000006445/ENSMUSG00000007653/ENSMUSG00000007783/ENSMUSG00000010803/ENSMUSG00000014361/ENSMUSG00000015533/ENSMUSG00000016481/ENSMUSG00000017057/ENSMUSG00000019256/ENSMUSG00000020122/…	Itgb2/Dlg3/Itga3/Grik3/Gria3/Axl/Grik5/Ddr1/Ptpn6/Cd44/Ephb3/Epha2/Gabrb2/Cpt1c/Gabra1/Mertk/Itga2/Cr1l/Il13ra1/Ahr/Egfr/Gabrg2/Gria1/Cacng4/Itgb4/Syk/Ror2/Il6st/Osmr/Shisa9/Shank3/Csf1r/Lrp5/Loxl4/Itgb8/Ly96/Gria4/Epha4/Plxna2/Apbb1ip/Olfm1/Acvr1/Notch1/Grin1/Itga4/Itgav/Il6ra/Tlr2/Ntrk1/Sdcbp/Epha7/Lrp8/Ephb2/Csf3r/Epha10/Epha5/Tgfbr3/Flt1/Plxna4/Plxna1/Plxnd1/Caprin2/Tnfrsf1a/Il4ra/Itgam/Itgax…	114
GO	BP	GO:0007411	axon guidance	80/2453	218/17047	1.63034e-16	1.38253e-13	ENSMUSG00000000247/ENSMUSG00000000627/ENSMUSG00000001227/ENSMUSG00000001761/ENSMUSG00000001847/ENSMUSG00000002633/ENSMUSG00000005958/ENSMUSG00000006445/ENSMUSG00000007989/ENSMUSG00000008575/ENSMUSG00000017724/ENSMUSG00000019647/ENSMUSG00000020598/ENSMUSG00000021262/ENSMUSG00000021318/ENSMUSG00000021451/ENSMUSG00000021848/ENSMUSG00000022263/ENSMUSG00000022687/ENSMUSG00000022883/ENSMUSG00000023951/…	Lhx2/Sema4f/Sema6b/Smo/Rac1/Shh/Ephb3/Epha2/Fzd3/Nfib/Etv4/Sema6a/Nrcam/Evl/Gli3/Sema4d/Otx2/Trio/Boc/Robo1/Vegfa/Csf1r/Sema4g/Nrp1/Nrp2/Epha4/Vangl2/Plxna2/Kif5c/Lhx3/Pax6/Efna1/Ntrk1/Epha7/Ephb2/Sema3c/Epha10/Epha5/Plxna4/Chl1/Plxna1/Plxnd1/Ptpro/Vasp/Cyfip1/Efnb1/L1cam/Plxna3/Slit2/Pvrl1/Neo1/Rac2/Ptprm/Prtg/Plxnb2/Egr2/Tgfb2/Dag1/Lrp1/Agrn/Isl1/Reln/Ccdc141/Tubb2b/Rtn4rl1/Lrtm1/Flrt2/Flrt3/Bm…	80
GO	BP	GO:0097485	neuron projection guidance	80/2453	219/17047	2.21264e-16	1.64178e-13	ENSMUSG00000000247/ENSMUSG00000000627/ENSMUSG00000001227/ENSMUSG00000001761/ENSMUSG00000001847/ENSMUSG00000002633/ENSMUSG00000005958/ENSMUSG00000006445/ENSMUSG00000007989/ENSMUSG00000008575/ENSMUSG00000017724/ENSMUSG00000019647/ENSMUSG00000020598/ENSMUSG00000021262/ENSMUSG00000021318/ENSMUSG00000021451/ENSMUSG00000021848/ENSMUSG00000022263/ENSMUSG00000022687/ENSMUSG00000022883/ENSMUSG00000023951/…	Lhx2/Sema4f/Sema6b/Smo/Rac1/Shh/Ephb3/Epha2/Fzd3/Nfib/Etv4/Sema6a/Nrcam/Evl/Gli3/Sema4d/Otx2/Trio/Boc/Robo1/Vegfa/Csf1r/Sema4g/Nrp1/Nrp2/Epha4/Vangl2/Plxna2/Kif5c/Lhx3/Pax6/Efna1/Ntrk1/Epha7/Ephb2/Sema3c/Epha10/Epha5/Plxna4/Chl1/Plxna1/Plxnd1/Ptpro/Vasp/Cyfip1/Efnb1/L1cam/Plxna3/Slit2/Pvrl1/Neo1/Rac2/Ptprm/Prtg/Plxnb2/Egr2/Tgfb2/Dag1/Lrp1/Agrn/Isl1/Reln/Ccdc141/Tubb2b/Rtn4rl1/Lrtm1/Flrt2/Flrt3/Bm…	80
GO	CC	GO:0031252	cell leading edge	119/2474	406/17165	4.23186e-15	2.56989e-13	ENSMUSG00000000392/ENSMUSG00000000915/ENSMUSG00000001025/ENSMUSG00000001847/ENSMUSG00000002489/ENSMUSG00000004056/ENSMUSG00000004263/ENSMUSG00000004626/ENSMUSG00000004631/ENSMUSG00000005057/ENSMUSG00000005087/ENSMUSG00000006445/ENSMUSG00000006699/ENSMUSG00000009073/ENSMUSG00000010803/ENSMUSG00000013076/ENSMUSG00000015745/ENSMUSG00000015968/ENSMUSG00000016933/ENSMUSG00000017314/ENSMUSG00000017774/…	Fap/Hip1r/S100a6/Rac1/Tiam1/Akt2/Atn1/Stxbp2/Sgce/Sh2b2/Cd44/Epha2/Cdc42/Nf2/Gabra1/Amotl1/Plekho1/Cacna1d/Plcg1/Mpp2/Myo1c/Cyth3/Ksr1/Atp2b1/Plek/Apc2/Cobl/Pdlim4/Gabrg2/Myo1g/Gria1/Slc9a3r1/Itgb4/Pld2/Akap5/Evl/Arf4/Lcp1/Ajuba/Myo10/Parvb/Myh9/Twf1/Shisa9/Samsn1/Tnfrsf12a/Fgd2/Epb4.1l3/Cdh2/Aif1/Cdc42bpg/Apbb1ip/Notch1/Grin1/Nckap1/Itgav/Lamp5/Src/Rab13/Arhgef2/Lmo4/Pdpn/Hpca/Fgr/Arpc3/Fscn1/Ex…	119
GO	BP	GO:0007156	homophilic cell adhesion via plasma membrane adhesion molecules	56/2453	127/17047	5.15423e-16	3.3995e-13	ENSMUSG00000005338/ENSMUSG00000006411/ENSMUSG00000020598/ENSMUSG00000022656/ENSMUSG00000022790/ENSMUSG00000022883/ENSMUSG00000024304/ENSMUSG00000026312/ENSMUSG00000029108/ENSMUSG00000031673/ENSMUSG00000031841/ENSMUSG00000032012/ENSMUSG00000032036/ENSMUSG00000032452/ENSMUSG00000033278/ENSMUSG00000033295/ENSMUSG00000034275/ENSMUSG00000035566/ENSMUSG00000035860/ENSMUSG00000036030/ENSMUSG00000036510/…	Cadm3/Pvrl4/Nrcam/Pvrl3/Igsf11/Robo1/Cdh2/Cdh7/Pcdh7/Cdh11/Cdh13/Pvrl1/Kirrel3/Clstn2/Ptprm/Ptprf/Igsf9b/Pcdh17/Cdhr3/Prtg/Cdh8/Plxnb2/Dchs1/Sdk1/Pvr/Igsf21/Sdk2/Pcdhb19/Pcdhb12/Pcdhb21/Ccdc141/Pcdhb14/Pcdhb7/Pcdhb3/Pcdhb10/Pcdhb20/Pcdhb17/Pcdhb15/Pcdhb13/Pcdhb16/Amigo2/Pcdhb18/Cdh20/Amigo1/Pcdhb9/Pcdh1/Robo2/Palld/Cdh24/Cdh3/Pvrl2/Pcdhb5/Celsr2/Fat1/Pcdhb22/Fat3	56
GO	BP	GO:0001525	angiogenesis	138/2453	488/17047	5.81741e-16	3.45322e-13	ENSMUSG00000000120/ENSMUSG00000000290/ENSMUSG00000000392/ENSMUSG00000000753/ENSMUSG00000000957/ENSMUSG00000001034/ENSMUSG00000002633/ENSMUSG00000004040/ENSMUSG00000004791/ENSMUSG00000005413/ENSMUSG00000005958/ENSMUSG00000006445/ENSMUSG00000006699/ENSMUSG00000007655/ENSMUSG00000008398/ENSMUSG00000010660/ENSMUSG00000013076/ENSMUSG00000014773/ENSMUSG00000015305/ENSMUSG00000015340/ENSMUSG00000015839/…	Ngfr/Itgb2/Fap/Serpinf1/Mmp14/Mapk7/Shh/Stat3/Pgf/Hmox1/Ephb3/Epha2/Cdc42/Cav1/Elk3/Plcd1/Amotl1/Dll1/Sash1/Cybb/Nfe2l2/Stard13/H2-M3/Sulf1/Plcg1/Sema6a/Nr2e1/Ctgf/Pik3cg/Rock2/Nrcam/Syk/Erap1/Plk2/Thbs4/Bmp4/Lect1/Enpp2/Myh9/Hdac7/Robo1/Adamts1/Cela1/Smoc2/Tnfrsf12a/Vegfa/Cyp1b1/Nrxn1/C3/Hbegf/Anxa1/Tmem2/Sat1/Itgb8/Nrp1/Nrp2/Casp8/Stat1/Fn1/Sp100/Vangl2/Acvr1/Dab2ip/Notch1/Itgav/Spred1/Efna1/Ad…	138
GO	BP	GO:0010001	glial cell differentiation	80/2453	224/17047	9.80168e-16	5.28934e-13	ENSMUSG00000000567/ENSMUSG00000001761/ENSMUSG00000001911/ENSMUSG00000002633/ENSMUSG00000004040/ENSMUSG00000004056/ENSMUSG00000006782/ENSMUSG00000008575/ENSMUSG00000010086/ENSMUSG00000014773/ENSMUSG00000017167/ENSMUSG00000017929/ENSMUSG00000019803/ENSMUSG00000020122/ENSMUSG00000020758/ENSMUSG00000020932/ENSMUSG00000021318/ENSMUSG00000021464/ENSMUSG00000021478/ENSMUSG00000021756/ENSMUSG00000021835/…	Sox9/Smo/Nfix/Shh/Stat3/Akt2/Cnp/Nfib/Rnf112/Dll1/Cntnap1/B4galt5/Nr2e1/Egfr/Itgb4/Gfap/Gli3/Ror2/Drd1a/Il6st/Bmp4/Clu/Enpp2/Tnfrsf21/Trem2/Sox8/Cdh2/Rela/Epha4/Serpine2/Notch1/Pax6/Spint1/Tlr2/Ppap2b/Dab1/Cdkn2c/Tnfrsf1b/Hdac1/Dtx1/Exoc4/Ptn/Cd9/Nlgn3/Il34/Mt3/Gpc1/Lif/Tmem98/Myrf/Lgi4/Dner/C1qa/Fgf2/Zfp365/Egr2/Atf5/Tlr4/Gpr126/Dag1/Adam22/Clcf1/Lyn/Reln/Zfp488/Kcnj10/Sh3tc2/Gpr157/Neurod4/Tenm…	80
GO	BP	GO:0002253	activation of immune response	111/2453	365/17047	1.92504e-15	9.52252e-13	ENSMUSG00000000409/ENSMUSG00000000732/ENSMUSG00000001123/ENSMUSG00000002699/ENSMUSG00000003352/ENSMUSG00000004266/ENSMUSG00000005057/ENSMUSG00000006519/ENSMUSG00000007655/ENSMUSG00000016481/ENSMUSG00000016493/ENSMUSG00000016528/ENSMUSG00000016933/ENSMUSG00000017412/ENSMUSG00000017830/ENSMUSG00000018899/ENSMUSG00000019843/ENSMUSG00000020227/ENSMUSG00000020399/ENSMUSG00000020437/ENSMUSG00000020641/…	Lck/Icosl/Lgals9/Lcp2/Cacnb3/Ptpn6/Sh2b2/Cyba/Cav1/Cr1l/Cd46/Mapkapk2/Plcg1/Cacnb4/Dhx58/Irf1/Fyn/Irak3/Havcr2/Myo1g/Rsad2/Syk/Erbb2ip/Fyb/Nckap1l/Cd86/Serping1/Tnfrsf21/C3/Tmem173/Rela/Pik3ap1/Ptprj/Irf7/Ly96/Cfh/Ptprc/Rab29/Dab2ip/Ifih1/Nfatc2/Tlr2/Pde4b/Cd38/Zc3hav1/A2m/Cd22/Trim30a/Irak1/Tlr3/Cmtm3/Tirap/Plscr1/Myd88/Mapkapk3/Cd59a/Vav3/Tlr13/Plcg2/Nfkbiz/Pawr/Cd276/C1qa/C1qc/C1qb/Unc93b1/Cd8…	111
GO	BP	GO:0007416	synapse assembly	67/2453	175/17047	4.18114e-15	1.90917e-12	ENSMUSG00000005958/ENSMUSG00000007653/ENSMUSG00000010803/ENSMUSG00000013033/ENSMUSG00000020436/ENSMUSG00000020704/ENSMUSG00000021451/ENSMUSG00000021782/ENSMUSG00000022623/ENSMUSG00000023328/ENSMUSG00000024109/ENSMUSG00000024304/ENSMUSG00000024647/ENSMUSG00000025555/ENSMUSG00000025656/ENSMUSG00000026433/ENSMUSG00000026959/ENSMUSG00000028072/ENSMUSG00000028184/ENSMUSG00000028249/ENSMUSG00000028289/…	Ephb3/Gabrb2/Gabra1/Lphn1/Gabrg2/Asic2/Sema4d/Dlg5/Shank3/Ache/Nrxn1/Cdh2/Cbln2/Farp1/Arhgef9/Rab29/Grin1/Ntrk1/Lphn2/Sdcbp/Epha7/Ptprd/Ephb2/Add2/Plxnd1/Gpc4/Efnb1/Nlgn3/Gpm6a/Pvrl1/Kirrel3/Clstn2/Gabrb3/Nrxn2/Cacna1a/Bai1/Mdga2/Eef2k/Pcdh17/Lrrn3/Plxnb2/Lrfn3/Shank2/Lphn3/Shank1/Sdk1/Magi2/Sdk2/Agrn/Reln/Cux2/Sipa1l1/Lrtm1/Lrrc4b/Flrt2/Pcdhb16/Amigo2/Slitrk3/Lrrc4/Amigo1/Flrt3/Ntrk2/Lrrtm1/Nlgn…	67
GO	BP	GO:0045785	positive regulation of cell adhesion	113/2453	379/17047	5.03617e-15	2.13533e-12	ENSMUSG00000000409/ENSMUSG00000000732/ENSMUSG00000001123/ENSMUSG00000001507/ENSMUSG00000001847/ENSMUSG00000002633/ENSMUSG00000004266/ENSMUSG00000005087/ENSMUSG00000006699/ENSMUSG00000006958/ENSMUSG00000007655/ENSMUSG00000007817/ENSMUSG00000014599/ENSMUSG00000015533/ENSMUSG00000016206/ENSMUSG00000016493/ENSMUSG00000016496/ENSMUSG00000018001/ENSMUSG00000018899/ENSMUSG00000019820/ENSMUSG00000019982/…	Lck/Icosl/Lgals9/Itga3/Rac1/Shh/Ptpn6/Cd44/Cdc42/Chrd/Cav1/Zmiz1/Csf1/Itga2/H2-M3/Cd46/Cd274/Cyth3/Irf1/Utrn/Myb/4632428N05Rik/Havcr2/Pld2/Stat5b/Gli3/Syk/Ap3b1/Il6st/Olfm4/Myo10/Fam49b/Enpp2/Nckap1l/Bcl6/Cd86/Smoc2/Vegfa/Vit/Aif1/Anxa1/Rela/Ptprj/Cd63/Nrp1/Fn1/Ptprc/Rsu1/Apbb1ip/Itga4/Itgav/Rasgrp1/Src/Il21/Il6ra/Vcam1/Cyr61/Epb4.1l4b/Ppap2b/Pdpn/Ptn/Il4ra/Sash3/Efnb1/Flna/Irak1/Cx3cl1/Cdh13/Ets…	113
GO	BP	GO:0050807	regulation of synapse organization	85/2453	252/17047	5.90299e-15	2.33601e-12	ENSMUSG00000000416/ENSMUSG00000002489/ENSMUSG00000002985/ENSMUSG00000005958/ENSMUSG00000006435/ENSMUSG00000006699/ENSMUSG00000013033/ENSMUSG00000019843/ENSMUSG00000020598/ENSMUSG00000020704/ENSMUSG00000021451/ENSMUSG00000021782/ENSMUSG00000021877/ENSMUSG00000022623/ENSMUSG00000024109/ENSMUSG00000024304/ENSMUSG00000024647/ENSMUSG00000025555/ENSMUSG00000025656/ENSMUSG00000025969/ENSMUSG00000026235/…	Cttnbp2/Tiam1/Apoe/Ephb3/Neurl1a/Cdc42/Lphn1/Fyn/Nrcam/Asic2/Sema4d/Dlg5/Arf4/Shank3/Nrxn1/Cdh2/Cbln2/Farp1/Arhgef9/Nrp2/Epha4/Dab2ip/Grin1/Efna1/Ntrk1/Lphn2/Epha7/Ptprd/Lrp8/Ephb2/Ptn/Grip2/Ptpro/Camk1/Caprin2/Cyfip1/Gpc4/Cdkl5/Nlgn3/Gpm6a/Sorbs2/Cntnap4/Pvrl1/Il10ra/Nedd4/Clstn2/Camkv/Ptprf/Arhgap44/Dbn1/Bai1/Mdga2/Eef2k/Tanc1/Lrrn3/Cdh8/Lrfn3/Shank2/Lphn3/Srcin1/Picalm/Dag1/Magi2/Agrn/Reln/Cux…	85
GO	CC	GO:0098936	intrinsic component of postsynaptic membrane	62/2474	162/17165	4.85174e-14	2.7008e-12	ENSMUSG00000000263/ENSMUSG00000001986/ENSMUSG00000003378/ENSMUSG00000004319/ENSMUSG00000007653/ENSMUSG00000010803/ENSMUSG00000017314/ENSMUSG00000019558/ENSMUSG00000020436/ENSMUSG00000020524/ENSMUSG00000020598/ENSMUSG00000020723/ENSMUSG00000021478/ENSMUSG00000022494/ENSMUSG00000022656/ENSMUSG00000024304/ENSMUSG00000025810/ENSMUSG00000025892/ENSMUSG00000025969/ENSMUSG00000026235/ENSMUSG00000026959/…	Glra1/Gria3/Grik5/Clcn3/Gabrb2/Gabra1/Mpp2/Slc6a8/Gabrg2/Gria1/Nrcam/Cacng4/Drd1a/Shisa9/Pvrl3/Cdh2/Nrp1/Gria4/Nrp2/Epha4/Grin1/Lphn2/Epha7/Slc6a9/Ephb2/Ptpro/Atp2b2/Slc6a11/Slc6a1/Nlgn3/Htr3a/Clstn2/Chrm1/Ptprf/Gabrb3/Bai1/Pcdh17/Lrfn3/Gabbr2/Cacng5/Adam22/Kcnd3/Adora1/D3Bwg0562e/Chrm3/Lrrc4b/Kcna1/Slitrk3/Lrrc4/Neto1/Lrrc4c/Cacna1c/Flrt3/Dlg2/Shisa6/Slc8a1/Cntn1/Kcnc1/Lrrtm1/Nlgn1/Grid2/Lrrtm2	62
GO	BP	GO:0001667	ameboidal-type cell migration	113/2453	381/17047	7.56431e-15	2.80636e-12	ENSMUSG00000000290/ENSMUSG00000000392/ENSMUSG00000000567/ENSMUSG00000000627/ENSMUSG00000000753/ENSMUSG00000001131/ENSMUSG00000001227/ENSMUSG00000001507/ENSMUSG00000001672/ENSMUSG00000001761/ENSMUSG00000001847/ENSMUSG00000002633/ENSMUSG00000002985/ENSMUSG00000005413/ENSMUSG00000006445/ENSMUSG00000009376/ENSMUSG00000013076/ENSMUSG00000015305/ENSMUSG00000015533/ENSMUSG00000015647/ENSMUSG00000015839/…	Itgb2/Fap/Sox9/Sema4f/Serpinf1/Timp1/Sema6b/Itga3/Marveld3/Smo/Rac1/Shh/Apoe/Hmox1/Epha2/Met/Amotl1/Sash1/Itga2/Lama5/Nfe2l2/Stard13/Plcg1/Anxa6/Sema6a/Nr2e1/Arid5b/Sgpl1/Rock2/Itgb4/Cygb/Evl/Sema4d/Plk2/Ptprg/Bmp4/Enpp2/Myh9/Hdac7/Robo1/Smoc2/Vegfa/Cyp1b1/Sox8/Hbegf/Anxa1/Lrp5/Sema4g/Cd63/Nrp1/Nrp2/Fn1/Sp100/Acvr1/Zeb2/Dab2ip/Notch1/Nckap1/Itga4/Itgav/Pax6/Spred1/Src/Schip1/Pfn2/Rab13/Efna1/Fbxw…	113
GO	CC	GO:0099055	integral component of postsynaptic membrane	59/2474	153/17165	1.34473e-13	6.79161e-12	ENSMUSG00000000263/ENSMUSG00000001986/ENSMUSG00000003378/ENSMUSG00000004319/ENSMUSG00000007653/ENSMUSG00000010803/ENSMUSG00000019558/ENSMUSG00000020436/ENSMUSG00000020524/ENSMUSG00000020598/ENSMUSG00000020723/ENSMUSG00000021478/ENSMUSG00000022494/ENSMUSG00000022656/ENSMUSG00000024304/ENSMUSG00000025810/ENSMUSG00000025892/ENSMUSG00000025969/ENSMUSG00000026235/ENSMUSG00000026959/ENSMUSG00000028184/…	Glra1/Gria3/Grik5/Clcn3/Gabrb2/Gabra1/Slc6a8/Gabrg2/Gria1/Nrcam/Cacng4/Drd1a/Shisa9/Pvrl3/Cdh2/Nrp1/Gria4/Nrp2/Epha4/Grin1/Lphn2/Epha7/Slc6a9/Ephb2/Ptpro/Atp2b2/Slc6a11/Slc6a1/Nlgn3/Htr3a/Clstn2/Chrm1/Ptprf/Gabrb3/Bai1/Pcdh17/Lrfn3/Gabbr2/Cacng5/Adam22/Kcnd3/Adora1/D3Bwg0562e/Chrm3/Lrrc4b/Kcna1/Slitrk3/Lrrc4/Neto1/Lrrc4c/Cacna1c/Flrt3/Shisa6/Slc8a1/Kcnc1/Lrrtm1/Nlgn1/Grid2/Lrrtm2	59
GO	CC	GO:0042734	presynaptic membrane	67/2474	186/17165	1.42339e-13	6.79161e-12	ENSMUSG00000000263/ENSMUSG00000000617/ENSMUSG00000001985/ENSMUSG00000001986/ENSMUSG00000003378/ENSMUSG00000005338/ENSMUSG00000013033/ENSMUSG00000015750/ENSMUSG00000015968/ENSMUSG00000017167/ENSMUSG00000017978/ENSMUSG00000019943/ENSMUSG00000020524/ENSMUSG00000021478/ENSMUSG00000022456/ENSMUSG00000023328/ENSMUSG00000024109/ENSMUSG00000024304/ENSMUSG00000024743/ENSMUSG00000024897/ENSMUSG00000024912/…	Glra1/Grm6/Grik3/Gria3/Grik5/Cadm3/Lphn1/Aph1a/Cacna1d/Cntnap1/Cadps2/Atp2b1/Gria1/Drd1a/Sept3/Ache/Nrxn1/Cdh2/Syt7/Apba1/Fosl1/Adam23/Epha4/Atp2b4/Grin1/Ptprd/Slc6a9/Ephb2/Atp2b2/Slc6a11/Slc6a1/Gpc4/Efnb1/Gpm6a/Cntnap4/Pvrl1/Htr3a/Chrm1/Nrxn2/Cacna1a/Pip5k1c/Pcdh17/Kcnc2/Syt1/Lrfn3/Kcnj9/Dgki/Picalm/Cplx3/Gabbr2/Igsf21/Adora1/Chrm3/Lrrc4b/Cltb/Marcksl1/Kcna1/Cacna1c/Cntn1/Slc6a2/Grik2/Grm7/Kcnc1…	67
GO	BP	GO:0031346	positive regulation of cell projection organization	124/2453	439/17047	2.00472e-14	6.99999e-12	ENSMUSG00000000753/ENSMUSG00000000861/ENSMUSG00000001507/ENSMUSG00000001847/ENSMUSG00000002489/ENSMUSG00000002985/ENSMUSG00000006435/ENSMUSG00000006699/ENSMUSG00000006930/ENSMUSG00000015533/ENSMUSG00000015839/ENSMUSG00000019843/ENSMUSG00000019970/ENSMUSG00000020132/ENSMUSG00000020173/ENSMUSG00000020467/ENSMUSG00000021057/ENSMUSG00000021068/ENSMUSG00000021451/ENSMUSG00000021782/ENSMUSG00000021835/…	Serpinf1/Bcl11a/Itga3/Rac1/Tiam1/Apoe/Neurl1a/Cdc42/Hap1/Itga2/Nfe2l2/Fyn/Sgk1/Rab21/Cobl/Efemp1/Akap5/Nin/Sema4d/Dlg5/Bmp4/Cpne6/Enpp2/Twf1/Shank3/Robo1/Adamts1/Ache/Tnfrsf12a/Vegfa/Rhoq/Syt4/Nrp1/Cflar/Fn1/Epha4/Serpine2/Syt2/Plxna2/Lcn2/Zeb2/Dab2ip/Grin1/Nckap1/Src/Ntrk1/Ptprd/Elavl4/Lrp8/Scarb2/P2rx7/Fscn1/Auts2/Plxna4/Ptn/Plxna1/Itpr1/Plxnd1/Camk1/Caprin2/Cyfip1/Syt3/Cdkl5/Nlgn3/Plxna3/Gpm6a…	124
GO	BP	GO:0007264	small GTPase mediated signal transduction	132/2453	479/17047	2.25248e-14	7.42817e-12	ENSMUSG00000000120/ENSMUSG00000001507/ENSMUSG00000001517/ENSMUSG00000001847/ENSMUSG00000002233/ENSMUSG00000002489/ENSMUSG00000002985/ENSMUSG00000004451/ENSMUSG00000004562/ENSMUSG00000004633/ENSMUSG00000004952/ENSMUSG00000005057/ENSMUSG00000005413/ENSMUSG00000006699/ENSMUSG00000009376/ENSMUSG00000009681/ENSMUSG00000014599/ENSMUSG00000015243/ENSMUSG00000017144/ENSMUSG00000017466/ENSMUSG00000017631/…	Ngfr/Itga3/Foxm1/Rac1/Rhoc/Tiam1/Apoe/Ralb/Arhgef40/Chn2/Rasa4/Sh2b2/Hmox1/Cdc42/Met/Bcr/Csf1/Abca1/Rnd3/Timp2/Abr/Cyth3/Cyth4/Ksr1/Arrb1/Rab3d/Rab21/Dock2/Rab36/Rock2/Net1/Rhobtb3/Arhgef28/Plk2/Arhgef3/Trio/Bcl6/Arl6/Robo1/Rab12/Fgd2/Rhoq/Cdh2/Aif1/Spry4/Plce1/Arhgdia/Farp1/Arhgef9/Nrp1/Rgl1/Vangl2/Ralgds/Dab2ip/Notch1/Nckap1/Rasgrp1/Src/Rab13/Arhgef2/Ntrk1/Sdcbp/Dab1/Dock7/Pdpn/Ephb2/Stmn1/Cnks…	132
GO	BP	GO:0008360	regulation of cell shape	57/2453	141/17047	2.96603e-14	9.26651e-12	ENSMUSG00000000982/ENSMUSG00000002233/ENSMUSG00000003283/ENSMUSG00000006219/ENSMUSG00000006699/ENSMUSG00000015745/ENSMUSG00000017144/ENSMUSG00000019843/ENSMUSG00000020284/ENSMUSG00000020733/ENSMUSG00000020953/ENSMUSG00000021451/ENSMUSG00000021589/ENSMUSG00000021665/ENSMUSG00000021814/ENSMUSG00000022272/ENSMUSG00000022438/ENSMUSG00000022443/ENSMUSG00000023951/ENSMUSG00000024044/ENSMUSG00000024143/…	Ccl3/Rhoc/Hck/Fblim1/Cdc42/Plekho1/Rnd3/Fyn/1810043G02Rik/Slc9a3r1/Coch/Sema4d/Rhobtb3/Hexb/Anxa7/Myo10/Parvb/Myh9/Vegfa/Epb4.1l3/Rhoq/Csf1r/Anxa1/Arhgdia/Limd1/Fn1/Plxna2/Ermn/Pdpn/Fgr/Rhoh/Plxna4/Ptn/Plxna1/Plxnd1/Cyfip1/Myh14/Parva/Msn/Plxna3/Arap1/Ccl12/Palm/Fmnl2/Plxnb2/Icam1/Fermt2/Rhou/Cdc42ep4/Cdc42se1/Rhoj/Cdc42ep1/D8Ertd82e/Fmnl1/Cfl1/Kdr/Sema3e	57
GO	BP	GO:0002764	immune response-regulating signaling pathway	95/2453	304/17047	3.34355e-14	9.92366e-12	ENSMUSG00000000409/ENSMUSG00000000732/ENSMUSG00000001123/ENSMUSG00000002699/ENSMUSG00000003352/ENSMUSG00000004266/ENSMUSG00000005057/ENSMUSG00000006519/ENSMUSG00000007655/ENSMUSG00000015947/ENSMUSG00000016206/ENSMUSG00000016528/ENSMUSG00000016933/ENSMUSG00000017412/ENSMUSG00000017830/ENSMUSG00000018899/ENSMUSG00000019843/ENSMUSG00000020227/ENSMUSG00000020399/ENSMUSG00000020437/ENSMUSG00000020641/…	Lck/Icosl/Lgals9/Lcp2/Cacnb3/Ptpn6/Sh2b2/Cyba/Cav1/Fcgr1/H2-M3/Mapkapk2/Plcg1/Cacnb4/Dhx58/Irf1/Fyn/Irak3/Havcr2/Myo1g/Rsad2/Syk/Erbb2ip/Fyb/Nckap1l/Cd86/Tnfrsf21/Tmem173/Rela/Pik3ap1/Ptprj/Irf7/Ly96/Ptprc/Rab29/Dab2ip/Ifih1/Nfatc2/Tlr2/Pde4b/Cd38/Zc3hav1/Cd22/Trim30a/Irak1/Tlr3/Cmtm3/Tirap/Ctsh/Plscr1/Myd88/Mapkapk3/Vav3/Tlr13/Plcg2/Nfkbiz/Pawr/Cd276/Unc93b1/Cd81/Themis2/Ddx60/Plcl2/Tlr4/Plekha1…	95
GO	BP	GO:0050804	modulation of chemical synaptic transmission	131/2453	478/17047	4.45484e-14	1.2092e-11	ENSMUSG00000000617/ENSMUSG00000001847/ENSMUSG00000001985/ENSMUSG00000002985/ENSMUSG00000003352/ENSMUSG00000003378/ENSMUSG00000004040/ENSMUSG00000004113/ENSMUSG00000005360/ENSMUSG00000006435/ENSMUSG00000006930/ENSMUSG00000009681/ENSMUSG00000010066/ENSMUSG00000010825/ENSMUSG00000015829/ENSMUSG00000015837/ENSMUSG00000015968/ENSMUSG00000016933/ENSMUSG00000017314/ENSMUSG00000017412/ENSMUSG00000017631/…	Grm6/Rac1/Grik3/Apoe/Cacnb3/Grik5/Stat3/Cacna1b/Slc1a3/Neurl1a/Hap1/Bcr/Cacna2d2/Grid2ip/Tnr/Sqstm1/Cacna1d/Plcg1/Mpp2/Cacnb4/Abr/Nr2e1/Fyn/Egfr/Gria1/Cacng4/Gfap/Ror2/Drd1a/Plk2/Jph4/Shisa9/Mapk8ip2/Shank3/Igsf11/Asic1/Nrxn1/Syt4/Celf4/Cdh2/Syt7/Apba1/Jph3/Gria4/Epha4/Serpine2/Dbi/Slc4a10/Grin1/Map1a/Src/Pfn2/Gucy1b3/Ntrk1/Ptprd/Slc6a9/Elavl4/Lrp8/Kcnq4/Ephb2/Ncdn/Cd38/Sorcs2/Ptn/Grip2/Erc1/Atp2…	131
GO	BP	GO:0050803	regulation of synapse structure or activity	85/2453	260/17047	4.48155e-14	1.2092e-11	ENSMUSG00000000416/ENSMUSG00000002489/ENSMUSG00000002985/ENSMUSG00000005958/ENSMUSG00000006435/ENSMUSG00000006699/ENSMUSG00000013033/ENSMUSG00000019843/ENSMUSG00000020598/ENSMUSG00000020704/ENSMUSG00000021451/ENSMUSG00000021782/ENSMUSG00000021877/ENSMUSG00000022623/ENSMUSG00000024109/ENSMUSG00000024304/ENSMUSG00000024647/ENSMUSG00000025555/ENSMUSG00000025656/ENSMUSG00000025969/ENSMUSG00000026235/…	Cttnbp2/Tiam1/Apoe/Ephb3/Neurl1a/Cdc42/Lphn1/Fyn/Nrcam/Asic2/Sema4d/Dlg5/Arf4/Shank3/Nrxn1/Cdh2/Cbln2/Farp1/Arhgef9/Nrp2/Epha4/Dab2ip/Grin1/Efna1/Ntrk1/Lphn2/Epha7/Ptprd/Lrp8/Ephb2/Ptn/Grip2/Ptpro/Camk1/Caprin2/Cyfip1/Gpc4/Cdkl5/Nlgn3/Gpm6a/Sorbs2/Cntnap4/Pvrl1/Il10ra/Nedd4/Clstn2/Camkv/Ptprf/Arhgap44/Dbn1/Bai1/Mdga2/Eef2k/Tanc1/Lrrn3/Cdh8/Lrfn3/Shank2/Lphn3/Srcin1/Picalm/Dag1/Magi2/Agrn/Reln/Cux…	85
GO	CC	GO:0044309	neuron spine	70/2474	201/17165	2.74254e-13	1.22134e-11	ENSMUSG00000000326/ENSMUSG00000000416/ENSMUSG00000000632/ENSMUSG00000000915/ENSMUSG00000001847/ENSMUSG00000001986/ENSMUSG00000002489/ENSMUSG00000003161/ENSMUSG00000005360/ENSMUSG00000005483/ENSMUSG00000006435/ENSMUSG00000006699/ENSMUSG00000010825/ENSMUSG00000017314/ENSMUSG00000018909/ENSMUSG00000019943/ENSMUSG00000020388/ENSMUSG00000020524/ENSMUSG00000020704/ENSMUSG00000021057/ENSMUSG00000021478/…	Comt/Cttnbp2/Sez6/Hip1r/Rac1/Gria3/Tiam1/Sri/Slc1a3/Dnajb1/Neurl1a/Cdc42/Grid2ip/Mpp2/Arrb1/Atp2b1/Pdlim4/Gria1/Asic2/Akap5/Drd1a/Arf4/Shisa9/Shank3/Asic1/Apba1/Farp1/Gria4/Epha4/Grin1/Pde4b/Hpca/P2rx4/Grip2/Ptpro/Cyfip1/Rgs10/Cttn/Ophn1/Gpm6a/Mt3/Nedd4/Arhgap44/Ctnnd1/Dbn1/Bai1/Eef2k/Palm/Lzts1/Shank2/Dgki/Shank1/Ppp1r9b/Adrbk2/Dlgap3/Adora1/Sipa1l1/Synpo/Lrrc4/Shisa6/Cnn3/Slc8a1/Ntrk2/Cfl1/Sept…	70
GO	CC	GO:0043197	dendritic spine	69/2474	197/17165	2.95977e-13	1.2357e-11	ENSMUSG00000000326/ENSMUSG00000000416/ENSMUSG00000000632/ENSMUSG00000000915/ENSMUSG00000001847/ENSMUSG00000001986/ENSMUSG00000002489/ENSMUSG00000003161/ENSMUSG00000005360/ENSMUSG00000005483/ENSMUSG00000006435/ENSMUSG00000006699/ENSMUSG00000010825/ENSMUSG00000017314/ENSMUSG00000018909/ENSMUSG00000019943/ENSMUSG00000020388/ENSMUSG00000020524/ENSMUSG00000020704/ENSMUSG00000021057/ENSMUSG00000021478/…	Comt/Cttnbp2/Sez6/Hip1r/Rac1/Gria3/Tiam1/Sri/Slc1a3/Dnajb1/Neurl1a/Cdc42/Grid2ip/Mpp2/Arrb1/Atp2b1/Pdlim4/Gria1/Asic2/Akap5/Drd1a/Arf4/Shisa9/Shank3/Asic1/Apba1/Farp1/Gria4/Epha4/Grin1/Pde4b/Hpca/P2rx4/Ptpro/Cyfip1/Rgs10/Cttn/Ophn1/Gpm6a/Mt3/Nedd4/Arhgap44/Ctnnd1/Dbn1/Bai1/Eef2k/Palm/Lzts1/Shank2/Dgki/Shank1/Ppp1r9b/Adrbk2/Dlgap3/Adora1/Sipa1l1/Synpo/Lrrc4/Shisa6/Cnn3/Slc8a1/Ntrk2/Cfl1/Sept11/Ppp…	69
GO	BP	GO:0099177	regulation of trans-synaptic signaling	131/2453	479/17047	5.28388e-14	1.3637e-11	ENSMUSG00000000617/ENSMUSG00000001847/ENSMUSG00000001985/ENSMUSG00000002985/ENSMUSG00000003352/ENSMUSG00000003378/ENSMUSG00000004040/ENSMUSG00000004113/ENSMUSG00000005360/ENSMUSG00000006435/ENSMUSG00000006930/ENSMUSG00000009681/ENSMUSG00000010066/ENSMUSG00000010825/ENSMUSG00000015829/ENSMUSG00000015837/ENSMUSG00000015968/ENSMUSG00000016933/ENSMUSG00000017314/ENSMUSG00000017412/ENSMUSG00000017631/…	Grm6/Rac1/Grik3/Apoe/Cacnb3/Grik5/Stat3/Cacna1b/Slc1a3/Neurl1a/Hap1/Bcr/Cacna2d2/Grid2ip/Tnr/Sqstm1/Cacna1d/Plcg1/Mpp2/Cacnb4/Abr/Nr2e1/Fyn/Egfr/Gria1/Cacng4/Gfap/Ror2/Drd1a/Plk2/Jph4/Shisa9/Mapk8ip2/Shank3/Igsf11/Asic1/Nrxn1/Syt4/Celf4/Cdh2/Syt7/Apba1/Jph3/Gria4/Epha4/Serpine2/Dbi/Slc4a10/Grin1/Map1a/Src/Pfn2/Gucy1b3/Ntrk1/Ptprd/Slc6a9/Elavl4/Lrp8/Kcnq4/Ephb2/Ncdn/Cd38/Sorcs2/Ptn/Grip2/Erc1/Atp2…	131
GO	BP	GO:0045666	positive regulation of neuron differentiation	121/2453	430/17047	5.60732e-14	1.38688e-11	ENSMUSG00000000753/ENSMUSG00000000861/ENSMUSG00000001507/ENSMUSG00000001847/ENSMUSG00000002489/ENSMUSG00000002633/ENSMUSG00000002985/ENSMUSG00000003948/ENSMUSG00000004031/ENSMUSG00000006435/ENSMUSG00000006930/ENSMUSG00000010086/ENSMUSG00000015839/ENSMUSG00000017466/ENSMUSG00000017491/ENSMUSG00000019843/ENSMUSG00000019970/ENSMUSG00000020027/ENSMUSG00000020132/ENSMUSG00000020173/ENSMUSG00000021057/…	Serpinf1/Bcl11a/Itga3/Rac1/Tiam1/Shh/Apoe/Mmd/Brinp2/Neurl1a/Hap1/Rnf112/Nfe2l2/Timp2/Rarb/Fyn/Sgk1/Socs2/Rab21/Cobl/Akap5/Nin/Rgs6/Sema4d/Dlg5/Bmp4/Cpne6/Twf1/Bcl6/Shank3/Robo1/Adamts1/Ache/Tnfrsf12a/Vegfa/Syt4/Nrp1/Cflar/Fn1/Epha4/Serpine2/Syt2/Plxna2/Zeb2/Dab2ip/Pax6/Dnmt3b/Arhgef2/Ntrk1/Ptprd/Dab1/Elavl4/Lrp8/Rest/Scarb2/Plxna4/Ptn/Plxna1/Grip2/Itpr1/Plxnd1/Camk1/Caprin2/Cyfip1/Syt3/Cdkl5/Nlg…	121
GO	CC	GO:0005912	adherens junction	93/2474	308/17165	6.58713e-13	2.58836e-11	ENSMUSG00000003283/ENSMUSG00000003872/ENSMUSG00000006219/ENSMUSG00000006411/ENSMUSG00000006445/ENSMUSG00000006519/ENSMUSG00000007655/ENSMUSG00000009073/ENSMUSG00000014773/ENSMUSG00000015533/ENSMUSG00000018001/ENSMUSG00000018340/ENSMUSG00000018387/ENSMUSG00000019906/ENSMUSG00000020388/ENSMUSG00000020653/ENSMUSG00000020758/ENSMUSG00000021262/ENSMUSG00000021782/ENSMUSG00000021998/ENSMUSG00000022178/…	Hck/Lin7b/Fblim1/Pvrl4/Epha2/Cyba/Cav1/Nf2/Dll1/Itga2/Cyth3/Anxa6/Shroom1/Lin7a/Pdlim4/Klf11/Itgb4/Evl/Dlg5/Lcp1/Ajuba/Parvb/Myh9/Pvrl3/Trip6/Cdh2/Limd1/Flnb/Itgb8/Tmem47/Nrp1/Map4k4/Cdh7/Ptprc/Capn2/Frmd4a/Rsu1/Apbb1ip/Fam129b/Notch1/Itgav/Mapre1/Adam15/Cpne3/Sdcbp/Epha5/Zyx/Vasp/Parva/Cttn/Msn/Sorbs2/Pdlim3/Cdh11/Cdh13/Pvrl1/Myo1e/Ptprm/Ctnnd1/Itga2b/Bai1/Tle2/Pip5k1c/Cd99l2/Wtip/Cdh8/Asap3/Ten…	93
GO	BP	GO:0002757	immune response-activating signal transduction	91/2453	291/17047	1.11147e-13	2.63906e-11	ENSMUSG00000000409/ENSMUSG00000000732/ENSMUSG00000001123/ENSMUSG00000002699/ENSMUSG00000003352/ENSMUSG00000004266/ENSMUSG00000005057/ENSMUSG00000006519/ENSMUSG00000007655/ENSMUSG00000016528/ENSMUSG00000016933/ENSMUSG00000017412/ENSMUSG00000017830/ENSMUSG00000018899/ENSMUSG00000019843/ENSMUSG00000020227/ENSMUSG00000020399/ENSMUSG00000020437/ENSMUSG00000020641/ENSMUSG00000021457/ENSMUSG00000021709/…	Lck/Icosl/Lgals9/Lcp2/Cacnb3/Ptpn6/Sh2b2/Cyba/Cav1/Mapkapk2/Plcg1/Cacnb4/Dhx58/Irf1/Fyn/Irak3/Havcr2/Myo1g/Rsad2/Syk/Erbb2ip/Fyb/Nckap1l/Cd86/Tnfrsf21/Tmem173/Rela/Pik3ap1/Ptprj/Irf7/Ly96/Ptprc/Rab29/Dab2ip/Ifih1/Nfatc2/Tlr2/Pde4b/Cd38/Zc3hav1/Cd22/Trim30a/Irak1/Tlr3/Cmtm3/Tirap/Plscr1/Myd88/Mapkapk3/Vav3/Tlr13/Plcg2/Nfkbiz/Pawr/Cd276/Unc93b1/Cd81/Themis2/Ddx60/Plcl2/Tlr4/Plekha1/Ddx58/C3ar1/Mill…	91
GO	BP	GO:0007265	Ras protein signal transduction	115/2453	407/17047	1.76307e-13	4.02522e-11	ENSMUSG00000000120/ENSMUSG00000001507/ENSMUSG00000001517/ENSMUSG00000001847/ENSMUSG00000002233/ENSMUSG00000002489/ENSMUSG00000002985/ENSMUSG00000004451/ENSMUSG00000004562/ENSMUSG00000004952/ENSMUSG00000005057/ENSMUSG00000006699/ENSMUSG00000009376/ENSMUSG00000009681/ENSMUSG00000014599/ENSMUSG00000015243/ENSMUSG00000017144/ENSMUSG00000017466/ENSMUSG00000017631/ENSMUSG00000018001/ENSMUSG00000018008/…	Ngfr/Itga3/Foxm1/Rac1/Rhoc/Tiam1/Apoe/Ralb/Arhgef40/Rasa4/Sh2b2/Cdc42/Met/Bcr/Csf1/Abca1/Rnd3/Timp2/Abr/Cyth3/Cyth4/Ksr1/Arrb1/Rab3d/Rab21/Dock2/Rab36/Rock2/Net1/Rhobtb3/Arhgef28/Plk2/Arhgef3/Trio/Bcl6/Arl6/Robo1/Rab12/Fgd2/Rhoq/Cdh2/Aif1/Spry4/Plce1/Arhgdia/Farp1/Arhgef9/Nrp1/Vangl2/Dab2ip/Notch1/Nckap1/Rasgrp1/Rab13/Arhgef2/Ntrk1/Sdcbp/Pdpn/Ephb2/Stmn1/Cnksr1/Rhoh/Rab35/Auts2/Rerg/Cyfip1/Psd3/A…	115
GO	BP	GO:0045088	regulation of innate immune response	87/2453	275/17047	1.86281e-13	4.09542e-11	ENSMUSG00000001123/ENSMUSG00000002985/ENSMUSG00000006519/ENSMUSG00000007655/ENSMUSG00000016206/ENSMUSG00000016528/ENSMUSG00000017830/ENSMUSG00000018899/ENSMUSG00000020227/ENSMUSG00000020399/ENSMUSG00000020641/ENSMUSG00000020707/ENSMUSG00000020919/ENSMUSG00000020953/ENSMUSG00000021709/ENSMUSG00000022901/ENSMUSG00000022906/ENSMUSG00000023224/ENSMUSG00000023990/ENSMUSG00000023992/ENSMUSG00000024339/…	Lgals9/Apoe/Cyba/Cav1/H2-M3/Mapkapk2/Dhx58/Irf1/Irak3/Havcr2/Rsad2/Rnf135/Stat5b/Coch/Erbb2ip/Cd86/Parp9/Serping1/Tfeb/Trem2/Tap2/Tmem173/Rela/Pik3ap1/Irf7/Ly96/Dab2ip/Ifih1/Nmi/Rasgrp1/Zbp1/Il21/Adar/Tlr2/Lrp8/Fgr/Zc3hav1/A2m/Lag3/Clec2d/Trim30a/Irak1/Tlr3/Tirap/Plscr1/Myd88/Mapkapk3/Tlr13/Vav1/Parp14/Grn/Unc93b1/Tap1/Gm4955/Ddx60/Susd4/Tlr4/Ddx58/Pvr/Mill2/Lyn/Pyhin1/Tril/Tlr7/Prkce/Tifa/Irgm1/…	87
GO	CC	GO:0045121	membrane raft	105/2474	368/17165	1.15537e-12	4.28771e-11	ENSMUSG00000000001/ENSMUSG00000000409/ENSMUSG00000001761/ENSMUSG00000002147/ENSMUSG00000002633/ENSMUSG00000002699/ENSMUSG00000003153/ENSMUSG00000003283/ENSMUSG00000005413/ENSMUSG00000007655/ENSMUSG00000007891/ENSMUSG00000009073/ENSMUSG00000010660/ENSMUSG00000013921/ENSMUSG00000014773/ENSMUSG00000015243/ENSMUSG00000015829/ENSMUSG00000015947/ENSMUSG00000016534/ENSMUSG00000016918/ENSMUSG00000017774/…	Gnai3/Lck/Smo/Stat6/Shh/Lcp2/Slc2a3/Hck/Hmox1/Cav1/Ctsd/Nf2/Plcd1/Clip3/Dll1/Abca1/Tnr/Fcgr1/Lamp2/Sulf1/Myo1c/Fyn/Atp2b1/Egfr/Prkar1a/Adcy3/Slc9a3r1/Pld2/Akap5/Drd1a/Faim2/Rhoq/Cdh2/Fas/Casp8/Cflar/Ptprc/Capn2/Stom/Spred1/Mal/Pag1/Src/Tlr2/Sdcbp/Pdpn/Tnfrsf1b/Lrp8/Slc9a1/Add2/Itpr1/Atp2b2/Tnfrsf1a/Efnb1/Gpm6b/Casp3/Cdh13/Tradd/Birc3/Nedd4/Plscr1/Tgfbr2/Gnai2/Atp1a1/Ctnnd1/Gpc1/Plvap/Myo1d/Mlc1/P…	105
GO	CC	GO:0070161	anchoring junction	95/2474	321/17165	1.37373e-12	4.64505e-11	ENSMUSG00000003283/ENSMUSG00000003872/ENSMUSG00000006219/ENSMUSG00000006411/ENSMUSG00000006445/ENSMUSG00000006519/ENSMUSG00000007655/ENSMUSG00000009073/ENSMUSG00000014773/ENSMUSG00000015533/ENSMUSG00000018001/ENSMUSG00000018340/ENSMUSG00000018387/ENSMUSG00000019906/ENSMUSG00000020388/ENSMUSG00000020653/ENSMUSG00000020758/ENSMUSG00000021262/ENSMUSG00000021782/ENSMUSG00000021998/ENSMUSG00000022178/…	Hck/Lin7b/Fblim1/Pvrl4/Epha2/Cyba/Cav1/Nf2/Dll1/Itga2/Cyth3/Anxa6/Shroom1/Lin7a/Pdlim4/Klf11/Itgb4/Evl/Dlg5/Lcp1/Ajuba/Parvb/Myh9/Pvrl3/Trip6/Cdh2/Limd1/Flnb/Itgb8/Tmem47/Nrp1/Map4k4/Cdh7/Ptprc/Capn2/Frmd4a/Rsu1/Apbb1ip/Fam129b/Notch1/Itgav/Mapre1/Adam15/Cpne3/Sdcbp/Epha5/Zyx/Vasp/Parva/Cttn/Msn/Sorbs2/Pdlim3/Cdh11/Cdh13/Jam3/Pvrl1/Myo1e/Ptprm/Ctnnd1/Itga2b/Bai1/Tle2/Pip5k1c/Cd99l2/Wtip/Cdh8/Asap…	95
GO	CC	GO:0098857	membrane microdomain	105/2474	369/17165	1.39073e-12	4.64505e-11	ENSMUSG00000000001/ENSMUSG00000000409/ENSMUSG00000001761/ENSMUSG00000002147/ENSMUSG00000002633/ENSMUSG00000002699/ENSMUSG00000003153/ENSMUSG00000003283/ENSMUSG00000005413/ENSMUSG00000007655/ENSMUSG00000007891/ENSMUSG00000009073/ENSMUSG00000010660/ENSMUSG00000013921/ENSMUSG00000014773/ENSMUSG00000015243/ENSMUSG00000015829/ENSMUSG00000015947/ENSMUSG00000016534/ENSMUSG00000016918/ENSMUSG00000017774/…	Gnai3/Lck/Smo/Stat6/Shh/Lcp2/Slc2a3/Hck/Hmox1/Cav1/Ctsd/Nf2/Plcd1/Clip3/Dll1/Abca1/Tnr/Fcgr1/Lamp2/Sulf1/Myo1c/Fyn/Atp2b1/Egfr/Prkar1a/Adcy3/Slc9a3r1/Pld2/Akap5/Drd1a/Faim2/Rhoq/Cdh2/Fas/Casp8/Cflar/Ptprc/Capn2/Stom/Spred1/Mal/Pag1/Src/Tlr2/Sdcbp/Pdpn/Tnfrsf1b/Lrp8/Slc9a1/Add2/Itpr1/Atp2b2/Tnfrsf1a/Efnb1/Gpm6b/Casp3/Cdh13/Tradd/Birc3/Nedd4/Plscr1/Tgfbr2/Gnai2/Atp1a1/Ctnnd1/Gpc1/Plvap/Myo1d/Mlc1/P…	105
GO	CC	GO:0031256	leading edge membrane	61/2474	169/17165	1.57761e-12	5.01829e-11	ENSMUSG00000000392/ENSMUSG00000000915/ENSMUSG00000001847/ENSMUSG00000002489/ENSMUSG00000004056/ENSMUSG00000004631/ENSMUSG00000005087/ENSMUSG00000006445/ENSMUSG00000006699/ENSMUSG00000010803/ENSMUSG00000015745/ENSMUSG00000015968/ENSMUSG00000017314/ENSMUSG00000017774/ENSMUSG00000018334/ENSMUSG00000019943/ENSMUSG00000020120/ENSMUSG00000020135/ENSMUSG00000020436/ENSMUSG00000020437/ENSMUSG00000020524/…	Fap/Hip1r/Rac1/Tiam1/Akt2/Sgce/Cd44/Epha2/Cdc42/Gabra1/Plekho1/Cacna1d/Mpp2/Myo1c/Ksr1/Atp2b1/Plek/Apc2/Gabrg2/Myo1g/Gria1/Akap5/Arf4/Lcp1/Twf1/Shisa9/Fgd2/Epb4.1l3/Aif1/Grin1/Nckap1/Itgav/Lamp5/Src/Arhgef2/Pdpn/Hpca/Fgr/Plxnd1/Vasp/Psd3/Cdkl5/Ank1/Nradd/Arhgap44/Mtss1l/Pip5k1c/Myo1d/Kcnc2/Hmha1/Palm/Fermt2/Eef1a1/Ppp1r9b/Cntnap2/Plekha1/Ddx58/Adora1/Shisa6/Cfl1/Kcnc1	61
GO	CC	GO:0033267	axon part	121/2474	456/17165	5.19519e-12	1.57745e-10	ENSMUSG00000000263/ENSMUSG00000000753/ENSMUSG00000000881/ENSMUSG00000001507/ENSMUSG00000001761/ENSMUSG00000001985/ENSMUSG00000001986/ENSMUSG00000002489/ENSMUSG00000003161/ENSMUSG00000003378/ENSMUSG00000004113/ENSMUSG00000004319/ENSMUSG00000006930/ENSMUSG00000009418/ENSMUSG00000013033/ENSMUSG00000015533/ENSMUSG00000016256/ENSMUSG00000017167/ENSMUSG00000017466/ENSMUSG00000019820/ENSMUSG00000019823/…	Glra1/Serpinf1/Dlg3/Itga3/Smo/Grik3/Gria3/Tiam1/Sri/Grik5/Cacna1b/Clcn3/Hap1/Nav1/Lphn1/Itga2/Ctsz/Cntnap1/Timp2/Utrn/Mical1/Rab21/Cobl/Gria1/Nrcam/Nin/Drd1a/Ap3b1/Otx2/Clu/Boc/Npff/Epb4.1l3/Nrxn1/Syt7/Nrp1/Gria4/Epha4/Kif5c/Ermn/Olfm1/Slc4a10/Grin1/Itga4/Mapk8ip1/Map1a/Lamp5/Anxa5/Kcnab1/Tpm3/Elavl4/Tnfrsf1b/Acap3/Arpc3/P2rx4/Fscn1/Auts2/Exoc4/Cyfip1/Calca/Myh14/Rgs10/Cttn/Ophn1/Cdkl5/Flna/Gpm6a…	121
GO	BP	GO:0009611	response to wounding	131/2453	496/17047	8.54933e-13	1.81246e-10	ENSMUSG00000001131/ENSMUSG00000001930/ENSMUSG00000002233/ENSMUSG00000002602/ENSMUSG00000002633/ENSMUSG00000002985/ENSMUSG00000003534/ENSMUSG00000004266/ENSMUSG00000005087/ENSMUSG00000005360/ENSMUSG00000005413/ENSMUSG00000006800/ENSMUSG00000007655/ENSMUSG00000008398/ENSMUSG00000014361/ENSMUSG00000015533/ENSMUSG00000015829/ENSMUSG00000015839/ENSMUSG00000018340/ENSMUSG00000020120/ENSMUSG00000020122/…	Timp1/Vwf/Rhoc/Axl/Shh/Apoe/Ddr1/Ptpn6/Cd44/Slc1a3/Hmox1/Sulf2/Cav1/Elk3/Mertk/Itga2/Tnr/Nfe2l2/Anxa6/Plek/Egfr/Kremen1/Itgb4/Gfap/Zfp36l1/Evl/Gli3/Syk/Ap3b1/Arf4/Lcp1/Ajuba/Myh9/Pros1/Serping1/Smoc2/Tnfrsf12a/C3/Aif1/Hbegf/Anxa1/Syt7/Fermt3/Cd151/Nrp1/Cflar/Fn1/Epha4/Serpine2/Vangl2/Col5a1/Notch1/Pax6/Anxa5/Adam15/Ntrk1/F3/Cyr61/Epb4.1l4b/Pdpn/P2rx4/Ptn/Tgfa/Cd9/Tyrobp/Flna/Casp3/Cx3cl1/Jam3/Uba…	131
GO	CC	GO:0098589	membrane region	106/2474	383/17165	7.12956e-12	2.07067e-10	ENSMUSG00000000001/ENSMUSG00000000409/ENSMUSG00000001761/ENSMUSG00000002147/ENSMUSG00000002633/ENSMUSG00000002699/ENSMUSG00000003153/ENSMUSG00000003283/ENSMUSG00000005413/ENSMUSG00000007655/ENSMUSG00000007891/ENSMUSG00000009073/ENSMUSG00000010660/ENSMUSG00000013921/ENSMUSG00000014773/ENSMUSG00000015243/ENSMUSG00000015829/ENSMUSG00000015947/ENSMUSG00000016493/ENSMUSG00000016534/ENSMUSG00000016918/…	Gnai3/Lck/Smo/Stat6/Shh/Lcp2/Slc2a3/Hck/Hmox1/Cav1/Ctsd/Nf2/Plcd1/Clip3/Dll1/Abca1/Tnr/Fcgr1/Cd46/Lamp2/Sulf1/Myo1c/Fyn/Atp2b1/Egfr/Prkar1a/Adcy3/Slc9a3r1/Pld2/Akap5/Drd1a/Faim2/Rhoq/Cdh2/Fas/Casp8/Cflar/Ptprc/Capn2/Stom/Spred1/Mal/Pag1/Src/Tlr2/Sdcbp/Pdpn/Tnfrsf1b/Lrp8/Slc9a1/Add2/Itpr1/Atp2b2/Tnfrsf1a/Efnb1/Gpm6b/Casp3/Cdh13/Tradd/Birc3/Nedd4/Plscr1/Tgfbr2/Gnai2/Atp1a1/Ctnnd1/Gpc1/Plvap/Myo1d/M…	106
GO	BP	GO:0031349	positive regulation of defense response	100/2453	345/17047	1.28047e-12	2.62098e-10	ENSMUSG00000000982/ENSMUSG00000001123/ENSMUSG00000002897/ENSMUSG00000006519/ENSMUSG00000007655/ENSMUSG00000015533/ENSMUSG00000015947/ENSMUSG00000016206/ENSMUSG00000016528/ENSMUSG00000017830/ENSMUSG00000018899/ENSMUSG00000020122/ENSMUSG00000020227/ENSMUSG00000020399/ENSMUSG00000020573/ENSMUSG00000020641/ENSMUSG00000020919/ENSMUSG00000020953/ENSMUSG00000021709/ENSMUSG00000022901/ENSMUSG00000022906/…	Ccl3/Lgals9/Il17ra/Cyba/Cav1/Itga2/Fcgr1/H2-M3/Mapkapk2/Dhx58/Irf1/Egfr/Irak3/Havcr2/Pik3cg/Rsad2/Stat5b/Coch/Erbb2ip/Cd86/Parp9/Abcc1/Trem2/C3/Tmem173/Il33/Rela/Pik3ap1/Irf7/Ly96/Dab2ip/Ifih1/Rasgrp1/Zbp1/Il21/Tlr2/Zc3hav1/Lag3/Tnfrsf1a/Ctsc/Nupr1/Cckbr/Trim30a/Irak1/Tlr3/Cx3cl1/Tradd/Ets1/Tirap/Plscr1/Myd88/Mapkapk3/Tlr13/Vav1/Cebpa/Nfkbiz/C1qa/Unc93b1/Cd81/Tgm2/Gm4955/Ddx60/Nod1/Ctss/Tlr4/Ddx5…	100
GO	BP	GO:0098542	defense response to other organism	117/2453	430/17047	1.76112e-12	3.48467e-10	ENSMUSG00000000275/ENSMUSG00000001123/ENSMUSG00000001166/ENSMUSG00000002897/ENSMUSG00000003283/ENSMUSG00000006403/ENSMUSG00000006445/ENSMUSG00000006519/ENSMUSG00000009585/ENSMUSG00000015947/ENSMUSG00000015950/ENSMUSG00000016206/ENSMUSG00000017830/ENSMUSG00000018102/ENSMUSG00000018899/ENSMUSG00000020399/ENSMUSG00000020641/ENSMUSG00000020941/ENSMUSG00000020953/ENSMUSG00000021194/ENSMUSG00000021457/…	Trim25/Lgals9/Oas1c/Il17ra/Hck/Adamts4/Epha2/Cyba/Apobec3/Fcgr1/Ncf1/H2-M3/Dhx58/Hist1h2bc/Irf1/Havcr2/Rsad2/Map3k14/Coch/Chga/Syk/Gsdmd/Adamts5/Cd86/Parp9/Ifngr2/Ifnar2/Mx2/Tfeb/Trem2/Eif2ak2/Tmem173/Il33/Ifitm1/Ifitm3/Irf7/Stat1/Atg16l1/Ptprc/Mr1/Lcn2/Ifih1/Zbp1/Adar/Tlr2/Gbp3/Gbp2/Fgr/Gbp9/P2rx7/Oasl2/Oas1b/Irf5/Zc3hav1/Tnfrsf1a/Il4ra/Itgax/Cd37/Trim30a/Tlr3/Plscr1/Myd88/Oas2/Rtp4/Ifit1/Bai1/C…	117
GO	BP	GO:0045765	regulation of angiogenesis	88/2453	290/17047	1.84702e-12	3.53674e-10	ENSMUSG00000000120/ENSMUSG00000000290/ENSMUSG00000000753/ENSMUSG00000001034/ENSMUSG00000002633/ENSMUSG00000004040/ENSMUSG00000004791/ENSMUSG00000005413/ENSMUSG00000006445/ENSMUSG00000014773/ENSMUSG00000015305/ENSMUSG00000015340/ENSMUSG00000015839/ENSMUSG00000016128/ENSMUSG00000016206/ENSMUSG00000016918/ENSMUSG00000016933/ENSMUSG00000019647/ENSMUSG00000019803/ENSMUSG00000020580/ENSMUSG00000021583/…	Ngfr/Itgb2/Serpinf1/Mapk7/Shh/Stat3/Pgf/Hmox1/Epha2/Dll1/Sash1/Cybb/Nfe2l2/Stard13/H2-M3/Sulf1/Plcg1/Sema6a/Nr2e1/Rock2/Erap1/Plk2/Thbs4/Lect1/Enpp2/Hdac7/Adamts1/Cela1/Smoc2/Tnfrsf12a/Vegfa/Cyp1b1/C3/Anxa1/Tmem2/Itgb8/Nrp1/Stat1/Sp100/Dab2ip/Notch1/Spred1/Efna1/Ntrk1/Fbxw7/Ddah1/Flt1/Ptn/Plxnd1/Tnfrsf1a/Pde3b/Itgax/Gpr124/Tlr3/Smad1/Gab1/Cx3cl1/Agt/Ets1/Ctsh/Tgfbr2/Cd59a/Card10/Ptprm/Lif/Bai1/Cx…	88
GO	CC	GO:0062023	collagen-containing extracellular matrix	91/2474	314/17165	1.46628e-11	4.08115e-10	ENSMUSG00000000753/ENSMUSG00000001025/ENSMUSG00000001119/ENSMUSG00000001123/ENSMUSG00000001131/ENSMUSG00000001930/ENSMUSG00000006403/ENSMUSG00000007891/ENSMUSG00000015647/ENSMUSG00000015829/ENSMUSG00000016256/ENSMUSG00000018340/ENSMUSG00000020019/ENSMUSG00000020044/ENSMUSG00000020241/ENSMUSG00000020467/ENSMUSG00000020758/ENSMUSG00000020953/ENSMUSG00000021223/ENSMUSG00000021702/ENSMUSG00000021814/…	Serpinf1/S100a6/Col6a1/Lgals9/Timp1/Vwf/Adamts4/Ctsd/Lama5/Tnr/Ctsz/Anxa6/Ntn4/Timp3/Col6a2/Efemp1/Itgb4/Coch/Papln/Thbs4/Anxa7/Clu/Bmp1/Col2a1/Adamts1/Adamts5/Cela1/Vwa5a/Serping1/Ache/Smoc2/Vegfa/Vit/Adamts10/Anxa1/Efemp2/Ltbp3/Col17a1/Kazald1/Cd151/Fn1/Serpine2/Plxna2/Col5a1/Anxa5/Col11a1/Cyr61/Sema3c/Ptn/Anxa4/Ctsc/Gpc4/Col4a1/Slit2/Col12a1/Plscr1/Trf/Tnxb/Gpc1/Fras1/Impg2/Ssc5d/Plxnb2/Tgm2/T…	91
GO	BP	GO:1901342	regulation of vasculature development	94/2453	320/17047	2.62465e-12	4.86873e-10	ENSMUSG00000000120/ENSMUSG00000000290/ENSMUSG00000000753/ENSMUSG00000001034/ENSMUSG00000002633/ENSMUSG00000004040/ENSMUSG00000004791/ENSMUSG00000005413/ENSMUSG00000006445/ENSMUSG00000014773/ENSMUSG00000015305/ENSMUSG00000015340/ENSMUSG00000015839/ENSMUSG00000016128/ENSMUSG00000016206/ENSMUSG00000016918/ENSMUSG00000016933/ENSMUSG00000019647/ENSMUSG00000019789/ENSMUSG00000019803/ENSMUSG00000020580/…	Ngfr/Itgb2/Serpinf1/Mapk7/Shh/Stat3/Pgf/Hmox1/Epha2/Dll1/Sash1/Cybb/Nfe2l2/Stard13/H2-M3/Sulf1/Plcg1/Sema6a/Hey2/Nr2e1/Rock2/Erap1/Plk2/Thbs4/Bmp4/Lect1/Enpp2/Hdac7/Adamts1/Cela1/Smoc2/Tnfrsf12a/Vegfa/Cyp1b1/C3/Anxa1/Tmem2/Itgb8/Nrp1/Cflar/Stat1/Sp100/Dab2ip/Notch1/Spred1/Nfatc2/Il6ra/Efna1/Ntrk1/Fbxw7/Ddah1/Flt1/Ptn/Plxnd1/Tnfrsf1a/Pde3b/Itgax/Gpr124/Tlr3/Smad1/Gab1/Cx3cl1/Agt/Ets1/Ctsh/Tgfbr2/C…	94
GO	CC	GO:0098889	intrinsic component of presynaptic membrane	46/2474	116/17165	2.0871e-11	5.57674e-10	ENSMUSG00000000263/ENSMUSG00000001986/ENSMUSG00000003378/ENSMUSG00000005338/ENSMUSG00000013033/ENSMUSG00000015750/ENSMUSG00000015968/ENSMUSG00000019943/ENSMUSG00000020524/ENSMUSG00000021478/ENSMUSG00000024109/ENSMUSG00000024304/ENSMUSG00000024743/ENSMUSG00000025964/ENSMUSG00000026235/ENSMUSG00000026463/ENSMUSG00000026959/ENSMUSG00000028399/ENSMUSG00000028542/ENSMUSG00000028664/ENSMUSG00000030302/…	Glra1/Gria3/Grik5/Cadm3/Lphn1/Aph1a/Cacna1d/Atp2b1/Gria1/Drd1a/Nrxn1/Cdh2/Syt7/Adam23/Epha4/Atp2b4/Grin1/Ptprd/Slc6a9/Ephb2/Atp2b2/Slc6a11/Slc6a1/Gpc4/Efnb1/Gpm6a/Cntnap4/Pvrl1/Htr3a/Chrm1/Cacna1a/Pcdh17/Lrfn3/Kcnj9/Cplx3/Gabbr2/Adora1/Chrm3/Marcksl1/Kcna1/Cacna1c/Cntn1/Grm7/Kcnc1/Flot2/Syt11	46
GO	CC	GO:0060076	excitatory synapse	33/2474	68/17165	2.19999e-11	5.65229e-10	ENSMUSG00000001507/ENSMUSG00000001986/ENSMUSG00000005338/ENSMUSG00000017978/ENSMUSG00000020524/ENSMUSG00000021057/ENSMUSG00000022623/ENSMUSG00000022790/ENSMUSG00000024109/ENSMUSG00000026959/ENSMUSG00000028525/ENSMUSG00000028542/ENSMUSG00000030302/ENSMUSG00000030447/ENSMUSG00000031302/ENSMUSG00000033295/ENSMUSG00000034675/ENSMUSG00000035864/ENSMUSG00000038026/ENSMUSG00000038665/ENSMUSG00000038738/…	Itga3/Gria3/Cadm3/Cadps2/Gria1/Akap5/Shank3/Igsf11/Nrxn1/Grin1/Pde4b/Slc6a9/Atp2b2/Cyfip1/Nlgn3/Ptprf/Dbn1/Syt1/Kcnj9/Dgki/Shank1/Picalm/Plcb4/Lrrc4/Neto1/Shisa6/Ntrk2/Lrrtm1/Ctnna2/Nlgn1/Syt11/Grid2/Lrrtm2	33
GO	CC	GO:0031012	extracellular matrix	111/2474	415/17165	2.34414e-11	5.79958e-10	ENSMUSG00000000753/ENSMUSG00000000957/ENSMUSG00000001025/ENSMUSG00000001119/ENSMUSG00000001123/ENSMUSG00000001131/ENSMUSG00000001930/ENSMUSG00000002633/ENSMUSG00000002985/ENSMUSG00000006403/ENSMUSG00000007891/ENSMUSG00000013150/ENSMUSG00000015647/ENSMUSG00000015829/ENSMUSG00000016256/ENSMUSG00000018340/ENSMUSG00000019997/ENSMUSG00000020019/ENSMUSG00000020044/ENSMUSG00000020241/ENSMUSG00000020467/…	Serpinf1/Mmp14/S100a6/Col6a1/Lgals9/Timp1/Vwf/Shh/Apoe/Adamts4/Ctsd/Gfod2/Lama5/Tnr/Ctsz/Anxa6/Ctgf/Ntn4/Timp3/Col6a2/Efemp1/Itgb4/Coch/Papln/Cd180/Thbs4/Anxa7/Clu/Bmp1/Col2a1/Adamts1/Adamts5/Cela1/Vwa5a/Serping1/Ache/Smoc2/Vegfa/Vit/Adamts10/Anxa1/Efemp2/Ltbp3/Col17a1/Kazald1/Cd151/Fn1/Serpine2/Lrrn2/Plxna2/Col5a1/Anxa5/Col11a1/Cyr61/Sema3c/Tgfbr3/Ptn/Anxa4/Lrig1/Ctsc/Gpc4/Col4a1/Slit2/Thsd4/Col…	111
GO	BP	GO:0010769	regulation of cell morphogenesis involved in differentiation	93/2453	318/17047	4.52571e-12	8.14079e-10	ENSMUSG00000000627/ENSMUSG00000000861/ENSMUSG00000001227/ENSMUSG00000001847/ENSMUSG00000002489/ENSMUSG00000002985/ENSMUSG00000005958/ENSMUSG00000006699/ENSMUSG00000015342/ENSMUSG00000015829/ENSMUSG00000019647/ENSMUSG00000019803/ENSMUSG00000019970/ENSMUSG00000020132/ENSMUSG00000021057/ENSMUSG00000021068/ENSMUSG00000021451/ENSMUSG00000022026/ENSMUSG00000022425/ENSMUSG00000022623/ENSMUSG00000022780/…	Sema4f/Bcl11a/Sema6b/Rac1/Tiam1/Apoe/Ephb3/Cdc42/Xk/Tnr/Sema6a/Nr2e1/Sgk1/Rab21/Akap5/Nin/Sema4d/Olfm4/Enpp2/Shank3/Mfi2/Robo1/St6gal1/Ache/Tnfrsf12a/Vegfa/Cdh2/Sema4g/Nrp1/Fn1/Epha4/Plxna2/Olfm1/Zeb2/Grin1/Ttl/Efna1/Epha7/Ptprd/Dab1/Pdpn/Lrp8/Ephb2/Sema3c/Plxna4/Plxna1/Plxnd1/Caprin2/Cyfip1/Cttn/Cdkl5/Nlgn3/Flna/Plxna3/Slit2/Mt3/Nedd4/Triobp/Ptprf/Arhgap44/Cacna1a/Dbn1/Eef2k/Lzts1/Plxnb2/Srcin1/…	93
GO	BP	GO:0002237	response to molecule of bacterial origin	94/2453	324/17047	5.73374e-12	1.00104e-09	ENSMUSG00000000326/ENSMUSG00000000982/ENSMUSG00000001123/ENSMUSG00000002602/ENSMUSG00000006345/ENSMUSG00000006782/ENSMUSG00000009681/ENSMUSG00000015243/ENSMUSG00000015305/ENSMUSG00000016206/ENSMUSG00000016496/ENSMUSG00000016528/ENSMUSG00000017631/ENSMUSG00000018774/ENSMUSG00000020227/ENSMUSG00000020399/ENSMUSG00000020638/ENSMUSG00000020919/ENSMUSG00000021423/ENSMUSG00000021624/ENSMUSG00000021709/…	Comt/Ccl3/Lgals9/Axl/Ggt1/Cnp/Bcr/Abca1/Sash1/H2-M3/Cd274/Mapkapk2/Abr/Cd68/Irak3/Havcr2/Cmpk2/Stat5b/Ly86/Cd180/Erbb2ip/Litaf/Cd86/Ccrn4l/Trem2/Eif2ak2/Tap2/Rela/Nfkb2/Ly96/Casp1/Ncf2/Capn2/Mrc1/Lcn2/Dab2ip/Notch1/Itgav/Src/Vcam1/Tlr2/Ptgfr/Nfkb1/Gbp2/Pde4b/Tnfrsf1b/Hdac1/P2rx7/Irf5/Irak1/Hpgd/Casp3/Cx3cl1/Tirap/Il10ra/Plscr1/Plscr2/Trib1/Myd88/Mapkapk3/Plcg2/Cxcl10/Ssc5d/Ccl12/Sbno2/Gng12/Arid5…	94
GO	CC	GO:0016323	basolateral plasma membrane	72/2474	230/17165	4.20322e-11	1.00277e-09	ENSMUSG00000000594/ENSMUSG00000000881/ENSMUSG00000001507/ENSMUSG00000003273/ENSMUSG00000003534/ENSMUSG00000003872/ENSMUSG00000005360/ENSMUSG00000007655/ENSMUSG00000009376/ENSMUSG00000013275/ENSMUSG00000016493/ENSMUSG00000017774/ENSMUSG00000018909/ENSMUSG00000019906/ENSMUSG00000019943/ENSMUSG00000020122/ENSMUSG00000020758/ENSMUSG00000021057/ENSMUSG00000021709/ENSMUSG00000023088/ENSMUSG00000024304/…	Gm2a/Dlg3/Itga3/Car11/Ddr1/Lin7b/Slc1a3/Cav1/Met/Slc41a1/Cd46/Myo1c/Arrb1/Lin7a/Atp2b1/Egfr/Itgb4/Akap5/Erbb2ip/Abcc1/Cdh2/Anxa1/Atp2b4/Vangl2/Slc4a10/Pdpn/Kcnq4/Slc9a1/Cd38/Tgfa/Slco2b1/Msn/Heph/Hpgd/Pth1r/Trf/Abcc4/Pkd1/Slc16a8/Atp1a1/Pkd2/Myo1d/Kcnc2/Mlc1/Palm/P2ry12/Cnnm4/Cd81/Nod1/Itga9/Dag1/Lrp1/Slc26a7/Adora1/Aqp5/Kcnj10/Epcam/Chrm3/P2ry6/C5ar1/Orai1/Dlg2/Dsp/Scn3a/Slc14a1/Flot1/Flot2/Erbb…	72
GO	BP	GO:0022407	regulation of cell-cell adhesion	102/2453	363/17047	6.02119e-12	1.02119e-09	ENSMUSG00000000409/ENSMUSG00000000693/ENSMUSG00000000732/ENSMUSG00000001034/ENSMUSG00000001123/ENSMUSG00000002633/ENSMUSG00000004266/ENSMUSG00000005087/ENSMUSG00000005958/ENSMUSG00000007655/ENSMUSG00000007817/ENSMUSG00000009073/ENSMUSG00000015829/ENSMUSG00000016206/ENSMUSG00000016493/ENSMUSG00000016496/ENSMUSG00000018899/ENSMUSG00000019982/ENSMUSG00000020101/ENSMUSG00000020399/ENSMUSG00000020612/…	Lck/Loxl3/Icosl/Mapk7/Lgals9/Shh/Ptpn6/Cd44/Ephb3/Cav1/Zmiz1/Nf2/Tnr/H2-M3/Cd46/Cd274/Irf1/Myb/4632428N05Rik/Havcr2/Prkar1a/Stat5b/Gli3/Syk/Ap3b1/Il6st/Dlg5/Bmp4/Myo10/Fam49b/Nckap1l/Bcl6/Cd86/Tnfrsf21/Vegfa/Aif1/Anxa1/Rela/Fermt3/Serpine2/Ptprc/Itga4/Rasgrp1/Pag1/Src/Il21/Il6ra/Vcam1/Epha7/Ppap2b/Pdpn/Dtx1/Lag3/Cd9/Il4ra/Sash3/Efnb1/Irak1/Casp3/Cx3cl1/Ubash3b/Ets1/Tgfbr2/Nck1/Mdga2/Nfkbiz/Tnfsf9…	102
GO	BP	GO:0010976	positive regulation of neuron projection development	97/2453	339/17047	6.37203e-12	1.05068e-09	ENSMUSG00000000753/ENSMUSG00000000861/ENSMUSG00000001507/ENSMUSG00000001847/ENSMUSG00000002489/ENSMUSG00000002985/ENSMUSG00000006435/ENSMUSG00000006930/ENSMUSG00000015839/ENSMUSG00000019843/ENSMUSG00000019970/ENSMUSG00000020132/ENSMUSG00000020173/ENSMUSG00000021057/ENSMUSG00000021068/ENSMUSG00000021451/ENSMUSG00000021782/ENSMUSG00000021835/ENSMUSG00000022212/ENSMUSG00000022451/ENSMUSG00000022623/…	Serpinf1/Bcl11a/Itga3/Rac1/Tiam1/Apoe/Neurl1a/Hap1/Nfe2l2/Fyn/Sgk1/Rab21/Cobl/Akap5/Nin/Sema4d/Dlg5/Bmp4/Cpne6/Twf1/Shank3/Robo1/Adamts1/Ache/Tnfrsf12a/Vegfa/Syt4/Nrp1/Cflar/Fn1/Epha4/Serpine2/Syt2/Plxna2/Zeb2/Dab2ip/Ntrk1/Ptprd/Elavl4/Lrp8/Scarb2/Plxna4/Ptn/Plxna1/Itpr1/Plxnd1/Camk1/Caprin2/Cyfip1/Syt3/Cdkl5/Nlgn3/Plxna3/Fgfr1/Cx3cl1/Agt/Fez1/Nck1/Ptprf/4833424O15Rik/Lif/Dbn1/Eef2k/Syt1/Plxnb2/S…	97
GO	CC	GO:0150034	distal axon	98/2474	358/17165	8.69293e-11	2.00237e-09	ENSMUSG00000000263/ENSMUSG00000000881/ENSMUSG00000001507/ENSMUSG00000001761/ENSMUSG00000001985/ENSMUSG00000001986/ENSMUSG00000002489/ENSMUSG00000003161/ENSMUSG00000003378/ENSMUSG00000004113/ENSMUSG00000004319/ENSMUSG00000006930/ENSMUSG00000013033/ENSMUSG00000015533/ENSMUSG00000016256/ENSMUSG00000017466/ENSMUSG00000019820/ENSMUSG00000019823/ENSMUSG00000020173/ENSMUSG00000021068/ENSMUSG00000021478/…	Glra1/Dlg3/Itga3/Smo/Grik3/Gria3/Tiam1/Sri/Grik5/Cacna1b/Clcn3/Hap1/Lphn1/Itga2/Ctsz/Timp2/Utrn/Mical1/Cobl/Nin/Drd1a/Otx2/Clu/Boc/Npff/Nrxn1/Syt7/Nrp1/Gria4/Epha4/Kif5c/Olfm1/Slc4a10/Grin1/Itga4/Mapk8ip1/Lamp5/Anxa5/Tpm3/Elavl4/Acap3/Arpc3/P2rx4/Fscn1/Auts2/Exoc4/Cyfip1/Calca/Myh14/Rgs10/Cttn/Ophn1/Cdkl5/Flna/Gpm6a/Pvrl1/Fez1/Tmod2/Chrm1/Ptprf/Gabrb3/Ctnnd1/Dbn1/Sncb/Tanc1/Kcnc2/Cdh8/Shank2/Dgki…	98
GO	CC	GO:0009897	external side of plasma membrane	96/2474	349/17165	1.0138e-10	2.2574e-09	ENSMUSG00000000263/ENSMUSG00000000732/ENSMUSG00000001507/ENSMUSG00000002985/ENSMUSG00000003420/ENSMUSG00000004319/ENSMUSG00000004609/ENSMUSG00000004730/ENSMUSG00000006204/ENSMUSG00000010142/ENSMUSG00000015243/ENSMUSG00000015533/ENSMUSG00000015947/ENSMUSG00000016206/ENSMUSG00000016481/ENSMUSG00000016496/ENSMUSG00000016763/ENSMUSG00000017057/ENSMUSG00000020101/ENSMUSG00000021756/ENSMUSG00000022620/…	Glra1/Icosl/Itga3/Apoe/Fcgrt/Clcn3/Cd33/Emr1/5430419D17Rik/Tnfrsf13b/Abca1/Itga2/Fcgr1/H2-M3/Cr1l/Cd274/Scube1/Il13ra1/4632428N05Rik/Il6st/Arsa/Cd86/Aqp4/Anxa1/Fas/Il1r1/Serpine2/Ptprc/Mr1/Capn2/Astn1/Ly75/Itgav/Anxa5/Il6ra/Vcam1/Pdpn/Csf3r/Gpr125/Epha5/Tgfbr3/Antxr2/P2rx7/Lag3/Clec2d/Cd9/Itgax/Ano1/Enox2/Gpc4/Cdh13/Mcam/Tgfbr2/Trf/Cd59a/Folr2/Itga2b/Cxcl10/Ssc5d/Cd276/H2-Q4/P2ry12/H2-Aa/Icam1/Tl…	96
GO	CC	GO:0015629	actin cytoskeleton	120/2474	472/17165	1.25945e-10	2.7139e-09	ENSMUSG00000000416/ENSMUSG00000000915/ENSMUSG00000001847/ENSMUSG00000003283/ENSMUSG00000005057/ENSMUSG00000006219/ENSMUSG00000006519/ENSMUSG00000009073/ENSMUSG00000016382/ENSMUSG00000017774/ENSMUSG00000018387/ENSMUSG00000018567/ENSMUSG00000019820/ENSMUSG00000019843/ENSMUSG00000020135/ENSMUSG00000020173/ENSMUSG00000020388/ENSMUSG00000020437/ENSMUSG00000020532/ENSMUSG00000021998/ENSMUSG00000022148/…	Cttnbp2/Hip1r/Rac1/Hck/Sh2b2/Fblim1/Cyba/Nf2/Pls3/Myo1c/Shroom1/Gabarap/Utrn/Fyn/Apc2/Cobl/Pdlim4/Myo1g/Acaca/Lcp1/Fyb/Tars/Myo10/Parvb/Myh9/Twf1/Trip6/Rhoq/Myo1f/Cdh2/Aif1/Anxa1/Fermt3/Flnb/Myo5b/Tnnt2/Vangl2/Neb/Nckap1/Src/Tpm3/Vcam1/Arhgef2/Gbp2/Tmod1/Cap1/Fgr/Ablim2/Arpc3/Fscn1/Arpc1b/Flt1/Auts2/Zyx/Add2/Myh14/Parva/Bag3/Cttn/Was/Ophn1/Flna/Arhgap6/Klhl2/Pdlim3/Tpm4/Tmod2/Myo1e/Triobp/Rac2/Mt…	120
GO	BP	GO:0051056	regulation of small GTPase mediated signal transduction	79/2453	260/17047	2.33315e-11	3.74313e-09	ENSMUSG00000001507/ENSMUSG00000001517/ENSMUSG00000002489/ENSMUSG00000002985/ENSMUSG00000004562/ENSMUSG00000004633/ENSMUSG00000004952/ENSMUSG00000005057/ENSMUSG00000009376/ENSMUSG00000009681/ENSMUSG00000014599/ENSMUSG00000015243/ENSMUSG00000017466/ENSMUSG00000017631/ENSMUSG00000018001/ENSMUSG00000018008/ENSMUSG00000018909/ENSMUSG00000020143/ENSMUSG00000021215/ENSMUSG00000021662/ENSMUSG00000021895/…	Itga3/Foxm1/Tiam1/Apoe/Arhgef40/Chn2/Rasa4/Sh2b2/Met/Bcr/Csf1/Abca1/Timp2/Abr/Cyth3/Cyth4/Arrb1/Dock2/Net1/Arhgef28/Arhgef3/Trio/Bcl6/Robo1/Fgd2/Cdh2/Spry4/Plce1/Arhgdia/Farp1/Arhgef9/Nrp1/Dab2ip/Notch1/Rasgrp1/Src/Arhgef2/Ntrk1/Ephb2/Stmn1/Auts2/Psd3/Arhgef6/Ophn1/Rasa3/Slit2/Kank2/Rasa2/Arhgef17/Arhgap44/Vav3/Vav1/Spry1/Arhgef4/Plekhg2/Plekhg6/Dgki/Tgfb2/Prex1/Dgkz/Iqsec3/Rap1gap/Kif14/Amot/Rel…	79
GO	CC	GO:0099056	integral component of presynaptic membrane	41/2474	104/17165	3.14679e-10	6.56893e-09	ENSMUSG00000000263/ENSMUSG00000001986/ENSMUSG00000003378/ENSMUSG00000005338/ENSMUSG00000013033/ENSMUSG00000015750/ENSMUSG00000015968/ENSMUSG00000019943/ENSMUSG00000020524/ENSMUSG00000021478/ENSMUSG00000024109/ENSMUSG00000024304/ENSMUSG00000024743/ENSMUSG00000025964/ENSMUSG00000026235/ENSMUSG00000026463/ENSMUSG00000026959/ENSMUSG00000028399/ENSMUSG00000028542/ENSMUSG00000028664/ENSMUSG00000030302/…	Glra1/Gria3/Grik5/Cadm3/Lphn1/Aph1a/Cacna1d/Atp2b1/Gria1/Drd1a/Nrxn1/Cdh2/Syt7/Adam23/Epha4/Atp2b4/Grin1/Ptprd/Slc6a9/Ephb2/Atp2b2/Slc6a11/Slc6a1/Efnb1/Gpm6a/Cntnap4/Pvrl1/Htr3a/Chrm1/Cacna1a/Pcdh17/Lrfn3/Kcnj9/Gabbr2/Adora1/Chrm3/Kcna1/Cacna1c/Grm7/Kcnc1/Syt11	41
GO	BP	GO:0099173	postsynapse organization	63/2453	191/17047	5.6042e-11	8.72714e-09	ENSMUSG00000000881/ENSMUSG00000001507/ENSMUSG00000002489/ENSMUSG00000002985/ENSMUSG00000003279/ENSMUSG00000005958/ENSMUSG00000006699/ENSMUSG00000017314/ENSMUSG00000019843/ENSMUSG00000020598/ENSMUSG00000021877/ENSMUSG00000022623/ENSMUSG00000024109/ENSMUSG00000024304/ENSMUSG00000025555/ENSMUSG00000025656/ENSMUSG00000025810/ENSMUSG00000025969/ENSMUSG00000026235/ENSMUSG00000026959/ENSMUSG00000027954/…	Dlg3/Itga3/Tiam1/Apoe/Dlgap1/Ephb3/Cdc42/Mpp2/Fyn/Nrcam/Arf4/Shank3/Nrxn1/Cdh2/Farp1/Arhgef9/Nrp1/Nrp2/Epha4/Grin1/Efna1/Epha7/Ptprd/Lrp8/Ephb2/Epha5/Ptn/Grip2/Caprin2/Cttn/Ophn1/Cdkl5/Nlgn3/Sorbs2/Ptprf/Arhgap44/Nrxn2/Dbn1/Bai1/Eef2k/Tanc1/Shank2/Zfp365/Srcin1/Nos1ap/Shank1/Magi2/Dgkz/Agrn/Reln/Cux2/Sipa1l1/Lrrc4b/Lrrc4/Dlg2/Shisa6/Cfl1/Camk2b/Lrrtm1/Nlgn1/Zfp804a/Grid2/Lrrtm2	63
GO	BP	GO:0002250	adaptive immune response	102/2453	376/17047	5.7338e-11	8.72714e-09	ENSMUSG00000000693/ENSMUSG00000000732/ENSMUSG00000001750/ENSMUSG00000002147/ENSMUSG00000002983/ENSMUSG00000004040/ENSMUSG00000004266/ENSMUSG00000004707/ENSMUSG00000004730/ENSMUSG00000008496/ENSMUSG00000010142/ENSMUSG00000015947/ENSMUSG00000016206/ENSMUSG00000016481/ENSMUSG00000016493/ENSMUSG00000016496/ENSMUSG00000018899/ENSMUSG00000019843/ENSMUSG00000019998/ENSMUSG00000020101/ENSMUSG00000020399/…	Loxl3/Icosl/Tcirg1/Stat6/Relb/Stat3/Ptpn6/Ly9/Emr1/Pou2f2/Tnfrsf13b/Fcgr1/H2-M3/Cr1l/Cd46/Cd274/Irf1/Fyn/Stx7/4632428N05Rik/Havcr2/Myo1g/Rsad2/Syk/Erap1/Fam49b/Bcl6/Samsn1/Cd86/Serping1/Parp3/Tnfrsf21/Vegfa/Tfeb/C3/Tap2/Anxa1/Fas/Il33/Nfkb2/Irf7/Il1r1/Ptprc/Fcamr/Pag1/Il6ra/Tnfrsf1b/Rnf19b/P2rx7/Lag3/Ctsc/Il4ra/Sash3/Was/Jam3/Rab27a/Nedd4/Ctsh/Myd88/Nfkbiz/Tmem98/H2-Q4/H2-Aa/C1qa/C1qc/C1qb/Tap1/I…	102
GO	CC	GO:0005911	cell-cell junction	112/2474	440/17165	4.86719e-10	9.85237e-09	ENSMUSG00000000409/ENSMUSG00000000881/ENSMUSG00000001672/ENSMUSG00000002489/ENSMUSG00000002699/ENSMUSG00000003872/ENSMUSG00000004266/ENSMUSG00000005320/ENSMUSG00000005338/ENSMUSG00000006411/ENSMUSG00000006445/ENSMUSG00000006699/ENSMUSG00000013076/ENSMUSG00000016933/ENSMUSG00000017167/ENSMUSG00000018001/ENSMUSG00000018340/ENSMUSG00000018387/ENSMUSG00000019906/ENSMUSG00000020388/ENSMUSG00000020524/…	Lck/Dlg3/Marveld3/Tiam1/Lcp2/Lin7b/Ptpn6/Fgfr4/Cadm3/Pvrl4/Epha2/Cdc42/Amotl1/Plcg1/Cntnap1/Cyth3/Anxa6/Shroom1/Lin7a/Pdlim4/Gria1/Dlg5/Ajuba/Myh9/Twf1/Pvrl3/Igsf11/Epb4.1l3/Nrxn1/Cdh2/Limd1/Ptprj/Tmem47/Cdh7/Vangl2/Frmd4a/Anxa5/Rab13/Arhgef2/Epb4.1l4b/Slc9a1/Abcb1b/P2rx7/Fscn1/Zyx/Vasp/Was/Flna/Pdlim3/Cdh11/Cdh13/Jam3/Pvrl1/Myo1e/Nck1/Atp1a1/Ptprm/Ctnnd1/Vav1/Pkd2/Gjc1/Dbn1/Cd99l2/Mlc1/Wtip/Cdh8…	112
GO	BP	GO:0032103	positive regulation of response to external stimulus	83/2453	284/17047	6.63989e-11	9.8536e-09	ENSMUSG00000000982/ENSMUSG00000001123/ENSMUSG00000001847/ENSMUSG00000002489/ENSMUSG00000002633/ENSMUSG00000002897/ENSMUSG00000004056/ENSMUSG00000004791/ENSMUSG00000006519/ENSMUSG00000009376/ENSMUSG00000014599/ENSMUSG00000015305/ENSMUSG00000015533/ENSMUSG00000015947/ENSMUSG00000017830/ENSMUSG00000020122/ENSMUSG00000020399/ENSMUSG00000020573/ENSMUSG00000020919/ENSMUSG00000021423/ENSMUSG00000021508/…	Ccl3/Lgals9/Rac1/Tiam1/Shh/Il17ra/Akt2/Pgf/Cyba/Met/Csf1/Sash1/Itga2/Fcgr1/Dhx58/Egfr/Havcr2/Pik3cg/Stat5b/Ly86/Cxcl14/Cd180/Thbs4/Nckap1l/Abcc1/Smoc2/Vegfa/Trem2/C3/Aif1/Il33/Ly96/Nrp1/Fn1/Tlr2/Edn2/P2rx4/Zc3hav1/Ptn/Tnfrsf1a/Ctsc/Nupr1/Slit2/Fgfr1/Tlr3/Cx3cl1/Cdh13/Tradd/Ets1/Smad3/Myd88/Rac2/Cxcl10/Cebpa/Nfkbiz/P2ry12/C1qa/Fgf2/Cd81/Tgm2/Ddx60/Nod1/Ctss/Tlr4/Thbs1/Lrp1/C3ar1/Cmklr1/Tubb2b/Cd24…	83
GO	BP	GO:0046578	regulation of Ras protein signal transduction	71/2453	228/17047	6.92917e-11	1.00321e-08	ENSMUSG00000001507/ENSMUSG00000001517/ENSMUSG00000002489/ENSMUSG00000002985/ENSMUSG00000004562/ENSMUSG00000004952/ENSMUSG00000005057/ENSMUSG00000009376/ENSMUSG00000009681/ENSMUSG00000014599/ENSMUSG00000015243/ENSMUSG00000017466/ENSMUSG00000017631/ENSMUSG00000018001/ENSMUSG00000018008/ENSMUSG00000018909/ENSMUSG00000020143/ENSMUSG00000021215/ENSMUSG00000021662/ENSMUSG00000021895/ENSMUSG00000022263/…	Itga3/Foxm1/Tiam1/Apoe/Arhgef40/Rasa4/Sh2b2/Met/Bcr/Csf1/Abca1/Timp2/Abr/Cyth3/Cyth4/Arrb1/Dock2/Net1/Arhgef28/Arhgef3/Trio/Bcl6/Robo1/Fgd2/Cdh2/Spry4/Plce1/Arhgdia/Farp1/Arhgef9/Nrp1/Dab2ip/Notch1/Rasgrp1/Arhgef2/Ntrk1/Ephb2/Stmn1/Auts2/Psd3/Arhgef6/Ophn1/Rasa3/Kank2/Rasa2/Arhgef17/Arhgap44/Vav3/Vav1/Spry1/Arhgef4/Plekhg2/Plekhg6/Dgki/Tgfb2/Prex1/Dgkz/Iqsec3/Kif14/Arhgef37/Cdc42se1/Prex2/D8Ertd8…	71
GO	BP	GO:0043087	regulation of GTPase activity	109/2453	413/17047	7.6551e-11	1.08192e-08	ENSMUSG00000000982/ENSMUSG00000001768/ENSMUSG00000002489/ENSMUSG00000004056/ENSMUSG00000004633/ENSMUSG00000004952/ENSMUSG00000005958/ENSMUSG00000006445/ENSMUSG00000009681/ENSMUSG00000016128/ENSMUSG00000017631/ENSMUSG00000018909/ENSMUSG00000018927/ENSMUSG00000019122/ENSMUSG00000019775/ENSMUSG00000020135/ENSMUSG00000020143/ENSMUSG00000020986/ENSMUSG00000021215/ENSMUSG00000021219/ENSMUSG00000021451/…	Ccl3/Rin2/Tiam1/Akt2/Chn2/Rasa4/Ephb3/Epha2/Bcr/Stard13/Abr/Arrb1/Ccl6/Ccl9/Rgs17/Apc2/Dock2/Sec23a/Net1/Rgs6/Sema4d/Gpr65/Ajuba/Nckap1l/Bcl6/Arhgdia/Nrp1/Epha4/Plxna2/Rgs5/Rsu1/Dab2ip/Rasgrp1/Ntrk1/Dock7/Acap3/Rgs12/Tbc1d1/Epha5/Plxna4/Plxna1/Plxnd1/Srgap3/Rgs10/Ophn1/Cdkl5/Arhgap6/Plxna3/Rasa3/Slit2/Tbc1d9/Gnao1/Cx3cl1/Rasa2/Arap1/Arhgap44/Vav3/Mtss1l/Vav1/Arhgap27/Ccl12/Hmha1/Dock4/Sh3bp4/Fam1…	109
GO	BP	GO:0002443	leukocyte mediated immunity	91/2453	325/17047	1.02575e-10	1.41601e-08	ENSMUSG00000000732/ENSMUSG00000000982/ENSMUSG00000001123/ENSMUSG00000001750/ENSMUSG00000002147/ENSMUSG00000004266/ENSMUSG00000004626/ENSMUSG00000005413/ENSMUSG00000008496/ENSMUSG00000009681/ENSMUSG00000015947/ENSMUSG00000015950/ENSMUSG00000016206/ENSMUSG00000016481/ENSMUSG00000016493/ENSMUSG00000017631/ENSMUSG00000019998/ENSMUSG00000020101/ENSMUSG00000020399/ENSMUSG00000020437/ENSMUSG00000020641/…	Icosl/Ccl3/Lgals9/Tcirg1/Stat6/Ptpn6/Stxbp2/Hmox1/Pou2f2/Bcr/Fcgr1/Ncf1/H2-M3/Cr1l/Cd46/Abr/Stx7/4632428N05Rik/Havcr2/Myo1g/Rsad2/Pld2/Stat5b/Chga/Syk/Fam49b/Bcl6/Serping1/Parp3/C3/Tap2/Fas/Irf7/Il1r1/Ptprc/Rasgrp1/Il21/Tnfrsf1b/Prdx1/Rnf19b/Fgr/P2rx7/Lag3/Clec2d/Ctsc/Il4ra/Sash3/Was/Tlr3/Rab27a/Ctsh/Myd88/Rac2/Vav1/H2-Q4/C1qa/C1qc/C1qb/Tap1/Icam1/Arid5a/Cd81/Cd84/Susd4/Tlr4/Fgl2/Ddx58/Pvr/Clcf1/…	91
GO	CC	GO:0098948	intrinsic component of postsynaptic specialization membrane	39/2474	99/17165	8.68635e-10	1.70661e-08	ENSMUSG00000000263/ENSMUSG00000001986/ENSMUSG00000003378/ENSMUSG00000007653/ENSMUSG00000010803/ENSMUSG00000017314/ENSMUSG00000020436/ENSMUSG00000020524/ENSMUSG00000020598/ENSMUSG00000020723/ENSMUSG00000022494/ENSMUSG00000022656/ENSMUSG00000024304/ENSMUSG00000025892/ENSMUSG00000026959/ENSMUSG00000028289/ENSMUSG00000030223/ENSMUSG00000030302/ENSMUSG00000031302/ENSMUSG00000032452/ENSMUSG00000032773/…	Glra1/Gria3/Grik5/Gabrb2/Gabra1/Mpp2/Gabrg2/Gria1/Nrcam/Cacng4/Shisa9/Pvrl3/Cdh2/Gria4/Grin1/Epha7/Ptpro/Atp2b2/Nlgn3/Clstn2/Chrm1/Ptprf/Gabrb3/Lrfn3/Adam22/Kcnd3/D3Bwg0562e/Chrm3/Lrrc4b/Slitrk3/Lrrc4/Neto1/Lrrc4c/Dlg2/Shisa6/Lrrtm1/Nlgn1/Grid2/Lrrtm2	39
GO	BP	GO:0072001	renal system development	85/2453	298/17047	1.5334e-10	2.0687e-08	ENSMUSG00000000567/ENSMUSG00000000753/ENSMUSG00000001507/ENSMUSG00000001761/ENSMUSG00000002633/ENSMUSG00000004791/ENSMUSG00000006800/ENSMUSG00000014303/ENSMUSG00000014773/ENSMUSG00000015647/ENSMUSG00000015750/ENSMUSG00000016918/ENSMUSG00000017491/ENSMUSG00000019947/ENSMUSG00000019979/ENSMUSG00000020097/ENSMUSG00000020140/ENSMUSG00000020758/ENSMUSG00000021318/ENSMUSG00000021782/ENSMUSG00000021835/…	Sox9/Serpinf1/Itga3/Smo/Shh/Pgf/Sulf2/Glis2/Dll1/Lama5/Aph1a/Sulf1/Rarb/Arid5b/Apaf1/Sgpl1/Lgr5/Itgb4/Gli3/Dlg5/Bmp4/Adamts1/Vegfa/Sox8/Cyp26a1/Plce1/Gdf11/Nrp1/Rdh10/Cflar/Stat1/Epha4/Vangl2/Notch1/Cat/Schip1/Wwtr1/Ampd2/Il6ra/Epha7/Nfia/Anxa4/Ptpro/Col4a1/Slit2/Fgfr1/Hpgd/Smad1/Agt/Kirrel3/Kank2/Myo1e/Stra6/Ctsh/Smad3/Nphp3/Pkd1/Ctnnd1/Lif/Pkd2/Fras1/Lzts2/Prkx/Dchs1/Tenc1/Spry1/Fgf2/Tgfb2/Wfs1…	85
GO	BP	GO:0001819	positive regulation of cytokine production	108/2453	413/17047	1.68455e-10	2.20752e-08	ENSMUSG00000000732/ENSMUSG00000000982/ENSMUSG00000001123/ENSMUSG00000002897/ENSMUSG00000004040/ENSMUSG00000004707/ENSMUSG00000006519/ENSMUSG00000006800/ENSMUSG00000015340/ENSMUSG00000016206/ENSMUSG00000016493/ENSMUSG00000016496/ENSMUSG00000016528/ENSMUSG00000016918/ENSMUSG00000017830/ENSMUSG00000018899/ENSMUSG00000019982/ENSMUSG00000020399/ENSMUSG00000020641/ENSMUSG00000020707/ENSMUSG00000020919/…	Icosl/Ccl3/Lgals9/Il17ra/Stat3/Ly9/Cyba/Sulf2/Cybb/H2-M3/Cd46/Cd274/Mapkapk2/Sulf1/Dhx58/Irf1/Myb/Havcr2/Rsad2/Rnf135/Stat5b/Syk/Clu/Fam49b/Gsdmd/Runx1/Trem2/Eif2ak2/Cyp1b1/C3/Tmem173/Aif1/Csf1r/Anxa1/Il33/Frmd8/Rela/Irf7/Ly96/Casp1/Casp8/Il1r1/Stat1/Ptprc/Ifih1/Rasgrp1/Src/Il21/Il6ra/Tlr2/Arhgef2/Pde4b/Tnfrsf8/Hdac1/Fgr/P2rx7/Zc3hav1/Clec5a/Tnfrsf1a/Tyrobp/Il4ra/Sash3/Irak1/Tlr3/Eif2ak3/Cx3cl1/T…	108
GO	BP	GO:0010631	epithelial cell migration	78/2453	265/17047	1.71068e-10	2.20752e-08	ENSMUSG00000000290/ENSMUSG00000000392/ENSMUSG00000000567/ENSMUSG00000000753/ENSMUSG00000001507/ENSMUSG00000001672/ENSMUSG00000002633/ENSMUSG00000002985/ENSMUSG00000005413/ENSMUSG00000006445/ENSMUSG00000009376/ENSMUSG00000013076/ENSMUSG00000015305/ENSMUSG00000015533/ENSMUSG00000015839/ENSMUSG00000016128/ENSMUSG00000016933/ENSMUSG00000019803/ENSMUSG00000020580/ENSMUSG00000021262/ENSMUSG00000021701/…	Itgb2/Fap/Sox9/Serpinf1/Itga3/Marveld3/Shh/Apoe/Hmox1/Epha2/Met/Amotl1/Sash1/Itga2/Nfe2l2/Stard13/Plcg1/Nr2e1/Rock2/Evl/Plk2/Ptprg/Bmp4/Enpp2/Myh9/Hdac7/Robo1/Smoc2/Vegfa/Cyp1b1/Hbegf/Anxa1/Cd63/Nrp1/Sp100/Zeb2/Dab2ip/Notch1/Itgav/Spred1/Src/Pfn2/Rab13/Efna1/Fbxw7/Epb4.1l4b/Glipr2/P2rx4/Ptn/Plxnd1/Nr2f2/Gpr124/Slit2/Fgfr1/Cdh13/Agt/Ets1/Kank2/Ctsh/Tgfbr2/Card10/Ptprm/Bai1/Prkx/Fgf2/Tgfb2/Thbs1/Am…	78
GO	BP	GO:0007015	actin filament organization	102/2453	383/17047	1.79886e-10	2.27193e-08	ENSMUSG00000000915/ENSMUSG00000001847/ENSMUSG00000002233/ENSMUSG00000006699/ENSMUSG00000009073/ENSMUSG00000009376/ENSMUSG00000016382/ENSMUSG00000017144/ENSMUSG00000017774/ENSMUSG00000018387/ENSMUSG00000018909/ENSMUSG00000019823/ENSMUSG00000019997/ENSMUSG00000020120/ENSMUSG00000020173/ENSMUSG00000020388/ENSMUSG00000020580/ENSMUSG00000021262/ENSMUSG00000021589/ENSMUSG00000021886/ENSMUSG00000021998/…	Hip1r/Rac1/Rhoc/Cdc42/Nf2/Met/Pls3/Rnd3/Myo1c/Shroom1/Arrb1/Mical1/Ctgf/Plek/Cobl/Pdlim4/Rock2/Evl/Rhobtb3/Gpr65/Lcp1/Twf1/Nckap1l/Shank3/Rhoq/Aif1/Nrp1/Tnnt2/Ermn/Neb/Nckap1/Src/Pfn2/Tpm3/Arhgef2/Tmod1/Cap1/Stmn1/Rhoh/Arpc3/Fscn1/Arpc1b/Zyx/Add2/Vasp/Cyfip1/Cttn/Was/Flna/Arhgap6/Slit2/Sorbs2/Pdlim3/Cx3cl1/Tpm4/Tmod2/Kank2/Smad3/Nck1/Trf/Inppl1/Arap1/Rac2/Diap2/Dbn1/Kiss1r/Pawr/C530008M17Rik/Mica…	102
GO	BP	GO:0045089	positive regulation of innate immune response	69/2453	224/17047	2.18558e-10	2.70284e-08	ENSMUSG00000001123/ENSMUSG00000006519/ENSMUSG00000007655/ENSMUSG00000016206/ENSMUSG00000016528/ENSMUSG00000017830/ENSMUSG00000018899/ENSMUSG00000020227/ENSMUSG00000020399/ENSMUSG00000020641/ENSMUSG00000020919/ENSMUSG00000020953/ENSMUSG00000021709/ENSMUSG00000022901/ENSMUSG00000022906/ENSMUSG00000024349/ENSMUSG00000024927/ENSMUSG00000025017/ENSMUSG00000025498/ENSMUSG00000025779/ENSMUSG00000026883/…	Lgals9/Cyba/Cav1/H2-M3/Mapkapk2/Dhx58/Irf1/Irak3/Havcr2/Rsad2/Stat5b/Coch/Erbb2ip/Cd86/Parp9/Tmem173/Rela/Pik3ap1/Irf7/Ly96/Dab2ip/Ifih1/Rasgrp1/Zbp1/Il21/Tlr2/Zc3hav1/Lag3/Trim30a/Irak1/Tlr3/Tirap/Plscr1/Myd88/Mapkapk3/Tlr13/Vav1/Unc93b1/Gm4955/Ddx60/Tlr4/Ddx58/Pvr/Mill2/Lyn/Pyhin1/Tril/Tlr7/Prkce/Tifa/Irgm1/Nr1h4/Cd14/5430435G22Rik/Trim12c/Flot1/Tnip2/Trim5/Irak2/Pvrl2/Hmgb1/Lsm14a/H2-T23/Tspan…	69
GO	BP	GO:0099084	postsynaptic specialization organization	26/2453	49/17047	2.25768e-10	2.73502e-08	ENSMUSG00000000881/ENSMUSG00000003279/ENSMUSG00000017314/ENSMUSG00000022623/ENSMUSG00000024109/ENSMUSG00000024304/ENSMUSG00000025656/ENSMUSG00000028399/ENSMUSG00000031214/ENSMUSG00000031302/ENSMUSG00000033768/ENSMUSG00000034675/ENSMUSG00000037541/ENSMUSG00000038738/ENSMUSG00000040003/ENSMUSG00000040479/ENSMUSG00000042453/ENSMUSG00000042700/ENSMUSG00000047085/ENSMUSG00000049939/ENSMUSG00000052572/…	Dlg3/Dlgap1/Mpp2/Shank3/Nrxn1/Cdh2/Arhgef9/Ptprd/Ophn1/Nlgn3/Nrxn2/Dbn1/Shank2/Shank1/Magi2/Dgkz/Reln/Sipa1l1/Lrrc4b/Lrrc4/Dlg2/Cfl1/Lrrtm1/Nlgn1/Grid2/Lrrtm2	26
GO	BP	GO:0040013	negative regulation of locomotion	87/2453	310/17047	2.32244e-10	2.7572e-08	ENSMUSG00000000266/ENSMUSG00000000275/ENSMUSG00000000562/ENSMUSG00000000627/ENSMUSG00000000753/ENSMUSG00000001131/ENSMUSG00000001227/ENSMUSG00000001672/ENSMUSG00000002633/ENSMUSG00000002985/ENSMUSG00000004040/ENSMUSG00000006958/ENSMUSG00000009681/ENSMUSG00000015839/ENSMUSG00000016128/ENSMUSG00000016918/ENSMUSG00000017631/ENSMUSG00000019647/ENSMUSG00000020262/ENSMUSG00000020733/ENSMUSG00000020810/…	Mid2/Trim25/Adora3/Sema4f/Serpinf1/Timp1/Sema6b/Marveld3/Shh/Apoe/Stat3/Chrd/Bcr/Nfe2l2/Stard13/Sulf1/Abr/Sema6a/Adarb1/Slc9a3r1/Cygb/Evl/Sema4d/Drd1a/Ptprg/Dlg5/Trim35/Robo1/St6gal1/Cyp1b1/Aif1/Ldlrad4/Fas/Il33/Trim8/Arhgdia/Sema4g/Ptprj/Cd63/Ifitm1/Nrp1/Sp100/Dab2ip/Notch1/Spred1/Pfn2/Adam15/Podn/Sema3c/Ptn/Nr2f2/Trim21/Was/Plxna3/Slit2/Cx3cl1/Trib1/Card10/Ptprm/Dbn1/Bai1/Ccl12/Fam115a/Fgf2/Lim…	87
GO	CC	GO:0030027	lamellipodium	58/2474	182/17165	1.51681e-09	2.89493e-08	ENSMUSG00000000392/ENSMUSG00000001847/ENSMUSG00000004626/ENSMUSG00000005087/ENSMUSG00000006445/ENSMUSG00000006699/ENSMUSG00000009073/ENSMUSG00000013076/ENSMUSG00000016933/ENSMUSG00000020135/ENSMUSG00000020388/ENSMUSG00000020437/ENSMUSG00000020828/ENSMUSG00000021262/ENSMUSG00000022178/ENSMUSG00000022272/ENSMUSG00000022438/ENSMUSG00000024304/ENSMUSG00000024397/ENSMUSG00000026786/ENSMUSG00000026923/…	Fap/Rac1/Stxbp2/Cd44/Epha2/Cdc42/Nf2/Amotl1/Plcg1/Apc2/Pdlim4/Myo1g/Pld2/Evl/Ajuba/Myo10/Parvb/Cdh2/Aif1/Apbb1ip/Notch1/Nckap1/Itgav/Rab13/Pdpn/Arpc3/Fscn1/Plxnd1/Vasp/Cyfip1/Parva/Cttn/Klhl2/Sorbs2/Nradd/Inppl1/Rac2/Ptprm/Mtss1l/Ctnnd1/Pkd2/Ptpn13/Dbn1/Fermt2/Srcin1/Ppp1r9b/2610034B18Rik/Dag1/Dgkz/Amot/Clrn1/Cfl1/Palld/Flot1/Unc5c/Flot2/Ctnna2/Fat1	58
GO	BP	GO:0002460	adaptive immune response based on somatic recombination of immune receptors built from immunoglobulin superfamily domains	78/2453	267/17047	2.537e-10	2.95287e-08	ENSMUSG00000000693/ENSMUSG00000000732/ENSMUSG00000001750/ENSMUSG00000002147/ENSMUSG00000002983/ENSMUSG00000004040/ENSMUSG00000004266/ENSMUSG00000004707/ENSMUSG00000008496/ENSMUSG00000015947/ENSMUSG00000016206/ENSMUSG00000016481/ENSMUSG00000016493/ENSMUSG00000016496/ENSMUSG00000018899/ENSMUSG00000019998/ENSMUSG00000020101/ENSMUSG00000020399/ENSMUSG00000020437/ENSMUSG00000020641/ENSMUSG00000022378/…	Loxl3/Icosl/Tcirg1/Stat6/Relb/Stat3/Ptpn6/Ly9/Pou2f2/Fcgr1/H2-M3/Cr1l/Cd46/Cd274/Irf1/Stx7/4632428N05Rik/Havcr2/Myo1g/Rsad2/Fam49b/Bcl6/Serping1/Parp3/Vegfa/C3/Tap2/Anxa1/Fas/Il33/Nfkb2/Irf7/Il1r1/Ptprc/Il6ra/Tnfrsf1b/P2rx7/Ctsc/Il4ra/Sash3/Was/Rab27a/Ctsh/Myd88/Nfkbiz/Tmem98/H2-Q4/C1qa/C1qc/C1qb/Icam1/Arid5a/Cd81/Susd4/Fgl2/Pvr/C3ar1/Clcf1/Mill2/Klhl6/Cd24a/Bcl3/C1ra/H2-T22/Fcer1g/Cfi/H2-Q7/B2m/…	78
GO	BP	GO:0009612	response to mechanical stimulus	66/2453	211/17047	2.60674e-10	2.9757e-08	ENSMUSG00000000409/ENSMUSG00000000567/ENSMUSG00000000957/ENSMUSG00000001847/ENSMUSG00000003352/ENSMUSG00000003545/ENSMUSG00000005360/ENSMUSG00000006519/ENSMUSG00000007655/ENSMUSG00000015533/ENSMUSG00000018899/ENSMUSG00000019796/ENSMUSG00000019843/ENSMUSG00000020122/ENSMUSG00000020704/ENSMUSG00000020941/ENSMUSG00000021313/ENSMUSG00000021754/ENSMUSG00000022462/ENSMUSG00000022623/ENSMUSG00000024109/…	Lck/Sox9/Mmp14/Rac1/Cacnb3/Fosb/Slc1a3/Cyba/Cav1/Itga2/Irf1/Lrp11/Fyn/Egfr/Asic2/Map3k14/Ryr2/Map3k1/Slc38a2/Shank3/Nrxn1/Fosl1/Rela/Arhgdia/Casp8/Serpine2/Src/Col11a1/Ntrk1/Nfkb1/Slc9a1/P2rx7/Foxp2/Asns/Ptn/Atp2b2/Ltbr/Tnfrsf1a/Bag3/Tlr3/Agt/Ets1/Stra6/Tgfbr2/Pkd1/Atp1a1/Nrxn2/Pkd2/Pawr/Txnip/Tlr4/Cntnap2/Dag1/Thbs1/Tlr7/Kcna5/Kcna1/Tifab/Tmem150c/Jun/Junb/Slc8a1/Kcnc1/Mapk3/Chil1/Jund	66
GO	CC	GO:0099060	integral component of postsynaptic specialization membrane	37/2474	93/17165	1.6872e-09	3.1307e-08	ENSMUSG00000000263/ENSMUSG00000001986/ENSMUSG00000003378/ENSMUSG00000007653/ENSMUSG00000010803/ENSMUSG00000020436/ENSMUSG00000020524/ENSMUSG00000020598/ENSMUSG00000020723/ENSMUSG00000022494/ENSMUSG00000022656/ENSMUSG00000024304/ENSMUSG00000025892/ENSMUSG00000026959/ENSMUSG00000028289/ENSMUSG00000030223/ENSMUSG00000030302/ENSMUSG00000031302/ENSMUSG00000032452/ENSMUSG00000032773/ENSMUSG00000033295/…	Glra1/Gria3/Grik5/Gabrb2/Gabra1/Gabrg2/Gria1/Nrcam/Cacng4/Shisa9/Pvrl3/Cdh2/Gria4/Grin1/Epha7/Ptpro/Atp2b2/Nlgn3/Clstn2/Chrm1/Ptprf/Gabrb3/Lrfn3/Adam22/Kcnd3/D3Bwg0562e/Chrm3/Lrrc4b/Slitrk3/Lrrc4/Neto1/Lrrc4c/Shisa6/Lrrtm1/Nlgn1/Grid2/Lrrtm2	37
GO	BP	GO:0090132	epithelium migration	78/2453	268/17047	3.08243e-10	3.45232e-08	ENSMUSG00000000290/ENSMUSG00000000392/ENSMUSG00000000567/ENSMUSG00000000753/ENSMUSG00000001507/ENSMUSG00000001672/ENSMUSG00000002633/ENSMUSG00000002985/ENSMUSG00000005413/ENSMUSG00000006445/ENSMUSG00000009376/ENSMUSG00000013076/ENSMUSG00000015305/ENSMUSG00000015533/ENSMUSG00000015839/ENSMUSG00000016128/ENSMUSG00000016933/ENSMUSG00000019803/ENSMUSG00000020580/ENSMUSG00000021262/ENSMUSG00000021701/…	Itgb2/Fap/Sox9/Serpinf1/Itga3/Marveld3/Shh/Apoe/Hmox1/Epha2/Met/Amotl1/Sash1/Itga2/Nfe2l2/Stard13/Plcg1/Nr2e1/Rock2/Evl/Plk2/Ptprg/Bmp4/Enpp2/Myh9/Hdac7/Robo1/Smoc2/Vegfa/Cyp1b1/Hbegf/Anxa1/Cd63/Nrp1/Sp100/Zeb2/Dab2ip/Notch1/Itgav/Spred1/Src/Pfn2/Rab13/Efna1/Fbxw7/Epb4.1l4b/Glipr2/P2rx4/Ptn/Plxnd1/Nr2f2/Gpr124/Slit2/Fgfr1/Cdh13/Agt/Ets1/Kank2/Ctsh/Tgfbr2/Card10/Ptprm/Bai1/Prkx/Fgf2/Tgfb2/Thbs1/Am…	78
GO	BP	GO:0002683	negative regulation of immune system process	112/2453	438/17047	3.29086e-10	3.6175e-08	ENSMUSG00000000567/ENSMUSG00000000693/ENSMUSG00000000982/ENSMUSG00000001123/ENSMUSG00000002147/ENSMUSG00000002602/ENSMUSG00000002633/ENSMUSG00000004266/ENSMUSG00000005413/ENSMUSG00000009681/ENSMUSG00000010142/ENSMUSG00000014361/ENSMUSG00000014773/ENSMUSG00000015839/ENSMUSG00000016206/ENSMUSG00000016481/ENSMUSG00000016493/ENSMUSG00000016496/ENSMUSG00000017631/ENSMUSG00000017830/ENSMUSG00000018774/…	Sox9/Loxl3/Ccl3/Lgals9/Stat6/Axl/Shh/Ptpn6/Hmox1/Bcr/Tnfrsf13b/Mertk/Dll1/Nfe2l2/H2-M3/Cr1l/Cd46/Cd274/Abr/Dhx58/Cd68/Irf1/4632428N05Rik/Irak3/Havcr2/Prkar1a/Stat5b/Zfp36l1/Gli3/Erbb2ip/Dlg5/Bmp4/Olfm4/Bcl6/Samsn1/Cd86/Serping1/Parp3/Tmem176a/Tnfrsf21/Tap2/Anxa1/Fas/Il33/Gal/Ptprj/Ptprc/Dab2ip/Notch1/Nmi/Pag1/Adar/Fbxw7/Dtx1/Tmem176b/A2m/Lag3/Clec2d/Cd22/Tyrobp/Il4ra/Cd37/Trim30a/Slit2/Casp3/Cx3c…	112
GO	BP	GO:0042110	T cell activation	110/2453	429/17047	3.99037e-10	4.30669e-08	ENSMUSG00000000409/ENSMUSG00000000693/ENSMUSG00000000732/ENSMUSG00000000861/ENSMUSG00000001123/ENSMUSG00000001750/ENSMUSG00000002147/ENSMUSG00000002633/ENSMUSG00000002799/ENSMUSG00000002983/ENSMUSG00000004040/ENSMUSG00000004266/ENSMUSG00000004707/ENSMUSG00000005087/ENSMUSG00000007655/ENSMUSG00000007817/ENSMUSG00000016206/ENSMUSG00000016493/ENSMUSG00000016496/ENSMUSG00000018899/ENSMUSG00000019843/…	Lck/Loxl3/Icosl/Bcl11a/Lgals9/Tcirg1/Stat6/Shh/Jag2/Relb/Stat3/Ptpn6/Ly9/Cd44/Cav1/Zmiz1/H2-M3/Cd46/Cd274/Irf1/Fyn/Myb/4632428N05Rik/Dock2/Havcr2/Prkar1a/Rsad2/Stat5b/Zfp36l1/Gli3/Syk/Ap3b1/Il6st/Dlg5/Bmp4/Lcp1/Fam49b/Myh9/Nckap1l/Bcl6/Cd86/Tnfrsf21/Aif1/Anxa1/Fas/Cd151/Ptprc/Rab29/Apbb1ip/Itgav/Mapk8ip1/Rasgrp1/Pag1/Il21/Il6ra/Vcam1/Tnfrsf1b/Rhoh/P2rx7/Lfng/Dtx1/Lag3/Il4ra/Sash3/Was/Msn/Efnb1/Ca…	110
GO	CC	GO:0031253	cell projection membrane	88/2474	329/17165	2.75956e-09	4.98213e-08	ENSMUSG00000000392/ENSMUSG00000000915/ENSMUSG00000001507/ENSMUSG00000001761/ENSMUSG00000001847/ENSMUSG00000002489/ENSMUSG00000004056/ENSMUSG00000004631/ENSMUSG00000005087/ENSMUSG00000006445/ENSMUSG00000006699/ENSMUSG00000010803/ENSMUSG00000015401/ENSMUSG00000015745/ENSMUSG00000015968/ENSMUSG00000017314/ENSMUSG00000017774/ENSMUSG00000018334/ENSMUSG00000019820/ENSMUSG00000019943/ENSMUSG00000020120/…	Fap/Hip1r/Itga3/Smo/Rac1/Tiam1/Akt2/Sgce/Cd44/Epha2/Cdc42/Gabra1/Tmem27/Plekho1/Cacna1d/Mpp2/Myo1c/Ksr1/Utrn/Atp2b1/Plek/Apc2/Gabrg2/Gria1/Slc9a3r1/Pld2/Akap5/Drd1a/Arf4/Lcp1/Myo10/Twf1/Shisa9/Shank3/Arl6/Fgd2/Epb4.1l3/Ehd3/Aif1/Grin1/Nckap1/Itgav/Lamp5/Mapre1/Src/Arhgef2/Pdpn/Hpca/Fgr/Rab35/Fscn1/Plxnd1/Vasp/Psd3/Msn/Cdkl5/Ank1/Nradd/Pth1r/Mtss1l/Kcnk1/Pkd2/Pip5k1c/Myo1d/Kcnc2/Hmha1/Palm/P2ry12/…	88
GO	BP	GO:0010959	regulation of metal ion transport	104/2453	400/17047	5.22031e-10	5.46806e-08	ENSMUSG00000000617/ENSMUSG00000000982/ENSMUSG00000003161/ENSMUSG00000003352/ENSMUSG00000004056/ENSMUSG00000004113/ENSMUSG00000004266/ENSMUSG00000006519/ENSMUSG00000006930/ENSMUSG00000007655/ENSMUSG00000009687/ENSMUSG00000014077/ENSMUSG00000015968/ENSMUSG00000016933/ENSMUSG00000017400/ENSMUSG00000017412/ENSMUSG00000019843/ENSMUSG00000019943/ENSMUSG00000019970/ENSMUSG00000020573/ENSMUSG00000020577/…	Grm6/Ccl3/Sri/Cacnb3/Akt2/Cacna1b/Ptpn6/Cyba/Hap1/Cav1/Fxyd5/Chp1/Cacna1d/Plcg1/Stac2/Cacnb4/Fyn/Atp2b1/Sgk1/Pik3cg/Tspan13/Slc9a3r1/Cacna1g/Akap5/Ryr2/Drd1a/Bmp4/Jph4/Fhl1/Trem2/Ehd3/Gal/Jph3/Cd63/Homer2/Serpine2/Dbi/Atp2b4/Stom/Grin1/Lrrc26/Kcnab1/Asph/Gem/Pde4b/Hpca/Slc9a1/P2rx7/P2rx4/Itpr1/Atp2b2/Flna/Gnao1/Cx3cl1/Agt/Ubash3b/Nedd4/Trf/Gnai2/Slc8b1/Atp1a1/Plcg2/Pkd2/Cacna1a/Cxcl10/Ccl12/Kcnc2…	104
GO	BP	GO:0097106	postsynaptic density organization	24/2453	44/17047	5.25067e-10	5.46806e-08	ENSMUSG00000000881/ENSMUSG00000003279/ENSMUSG00000017314/ENSMUSG00000022623/ENSMUSG00000024109/ENSMUSG00000024304/ENSMUSG00000028399/ENSMUSG00000031214/ENSMUSG00000033768/ENSMUSG00000034675/ENSMUSG00000037541/ENSMUSG00000038738/ENSMUSG00000040003/ENSMUSG00000040479/ENSMUSG00000042453/ENSMUSG00000042700/ENSMUSG00000047085/ENSMUSG00000049939/ENSMUSG00000052572/ENSMUSG00000056201/ENSMUSG00000060780/…	Dlg3/Dlgap1/Mpp2/Shank3/Nrxn1/Cdh2/Ptprd/Ophn1/Nrxn2/Dbn1/Shank2/Shank1/Magi2/Dgkz/Reln/Sipa1l1/Lrrc4b/Lrrc4/Dlg2/Cfl1/Lrrtm1/Nlgn1/Grid2/Lrrtm2	24
GO	BP	GO:0032496	response to lipopolysaccharide	86/2453	310/17047	5.53936e-10	5.66925e-08	ENSMUSG00000000326/ENSMUSG00000000982/ENSMUSG00000001123/ENSMUSG00000002602/ENSMUSG00000006345/ENSMUSG00000006782/ENSMUSG00000009681/ENSMUSG00000015243/ENSMUSG00000015305/ENSMUSG00000016496/ENSMUSG00000016528/ENSMUSG00000017631/ENSMUSG00000018774/ENSMUSG00000020227/ENSMUSG00000020399/ENSMUSG00000020638/ENSMUSG00000020919/ENSMUSG00000021423/ENSMUSG00000021624/ENSMUSG00000021709/ENSMUSG00000022500/…	Comt/Ccl3/Lgals9/Axl/Ggt1/Cnp/Bcr/Abca1/Sash1/Cd274/Mapkapk2/Abr/Cd68/Irak3/Havcr2/Cmpk2/Stat5b/Ly86/Cd180/Erbb2ip/Litaf/Cd86/Ccrn4l/Trem2/Eif2ak2/Rela/Nfkb2/Ly96/Casp1/Ncf2/Capn2/Mrc1/Lcn2/Dab2ip/Notch1/Src/Vcam1/Tlr2/Ptgfr/Nfkb1/Gbp2/Pde4b/Tnfrsf1b/Hdac1/P2rx7/Irak1/Hpgd/Casp3/Cx3cl1/Tirap/Il10ra/Plscr1/Plscr2/Trib1/Myd88/Mapkapk3/Plcg2/Cxcl10/Ccl12/Sbno2/Gng12/Arid5a/Akap12/Tlr4/Irf8/Tspo/Lyn/…	86
GO	BP	GO:0001822	kidney development	80/2453	281/17047	5.84185e-10	5.8775e-08	ENSMUSG00000000567/ENSMUSG00000000753/ENSMUSG00000001507/ENSMUSG00000001761/ENSMUSG00000002633/ENSMUSG00000004791/ENSMUSG00000006800/ENSMUSG00000014303/ENSMUSG00000014773/ENSMUSG00000015647/ENSMUSG00000015750/ENSMUSG00000016918/ENSMUSG00000017491/ENSMUSG00000019947/ENSMUSG00000019979/ENSMUSG00000020097/ENSMUSG00000021318/ENSMUSG00000021782/ENSMUSG00000021835/ENSMUSG00000022893/ENSMUSG00000023951/…	Sox9/Serpinf1/Itga3/Smo/Shh/Pgf/Sulf2/Glis2/Dll1/Lama5/Aph1a/Sulf1/Rarb/Arid5b/Apaf1/Sgpl1/Gli3/Dlg5/Bmp4/Adamts1/Vegfa/Sox8/Cyp26a1/Plce1/Gdf11/Nrp1/Rdh10/Cflar/Epha4/Vangl2/Notch1/Cat/Schip1/Wwtr1/Ampd2/Il6ra/Epha7/Anxa4/Ptpro/Slit2/Fgfr1/Hpgd/Smad1/Agt/Kirrel3/Kank2/Myo1e/Stra6/Ctsh/Smad3/Nphp3/Pkd1/Ctnnd1/Lif/Pkd2/Fras1/Lzts2/Prkx/Dchs1/Tenc1/Spry1/Fgf2/Tgfb2/Wfs1/Timeless/Magi2/C3ar1/Epcam/C…	80
GO	BP	GO:0070588	calcium ion transmembrane transport	84/2453	301/17047	6.40253e-10	6.33424e-08	ENSMUSG00000000409/ENSMUSG00000000982/ENSMUSG00000002083/ENSMUSG00000003161/ENSMUSG00000003352/ENSMUSG00000004113/ENSMUSG00000004266/ENSMUSG00000006519/ENSMUSG00000006930/ENSMUSG00000009292/ENSMUSG00000010066/ENSMUSG00000015968/ENSMUSG00000016933/ENSMUSG00000017400/ENSMUSG00000017412/ENSMUSG00000018340/ENSMUSG00000019843/ENSMUSG00000019943/ENSMUSG00000020573/ENSMUSG00000020577/ENSMUSG00000020723/…	Lck/Ccl3/Bbc3/Sri/Cacnb3/Cacna1b/Ptpn6/Cyba/Hap1/Trpm2/Cacna2d2/Cacna1d/Plcg1/Stac2/Cacnb4/Anxa6/Fyn/Atp2b1/Pik3cg/Tspan13/Cacng4/Cacna1g/Ryr2/Drd1a/Bmp4/Micu2/Jph4/Asic1/Ehd3/Cacna1h/Afg3l2/Plce1/Jph3/Dbi/Ptprc/Atp2b4/Grin1/Itgav/Anxa5/Asph/Gem/Pde4b/Hpca/Slc9a1/P2rx7/P2rx4/Itpr1/Atp2b2/Trpm1/Rasa3/Gpm6a/Cx3cl1/Ubash3b/Slc8b1/Pkd1/Plcg2/Pkd2/Cacna1a/Cxcl10/Pawr/P2ry12/Fgf2/Slc24a2/Nos1ap/Tgfb2/C…	84
GO	CC	GO:0030139	endocytic vesicle	56/2474	177/17165	3.88475e-09	6.82898e-08	ENSMUSG00000000409/ENSMUSG00000000915/ENSMUSG00000001750/ENSMUSG00000001761/ENSMUSG00000004319/ENSMUSG00000004626/ENSMUSG00000006699/ENSMUSG00000015243/ENSMUSG00000015340/ENSMUSG00000016534/ENSMUSG00000017639/ENSMUSG00000017774/ENSMUSG00000019998/ENSMUSG00000020122/ENSMUSG00000021262/ENSMUSG00000021457/ENSMUSG00000022032/ENSMUSG00000022212/ENSMUSG00000023460/ENSMUSG00000024065/ENSMUSG00000024109/…	Lck/Hip1r/Tcirg1/Smo/Clcn3/Stxbp2/Cdc42/Abca1/Cybb/Lamp2/Rab11fip4/Myo1c/Stx7/Egfr/Evl/Syk/Scara5/Cpne6/Rab12/Ehd3/Nrxn1/Tapbp/Syt7/Flnb/Pik3c2b/Vamp4/Dab2ip/Rab13/Tmem55a/Scarb2/Rab35/Zyx/Was/Nlgn3/Myo1e/Trf/Rab8b/Tap1/Picalm/Cdc42ep4/Amot/Inpp5f/Tlr7/Irgm1/Pld4/5430435G22Rik/Fmnl1/Rab31/H2-Q7/B2m/H2-K1/Flot2/H2-T23/Syt11/Fcho1/H2-D1	56
GO	BP	GO:0032970	regulation of actin filament-based process	98/2453	372/17047	7.73143e-10	7.46762e-08	ENSMUSG00000000915/ENSMUSG00000001847/ENSMUSG00000002233/ENSMUSG00000003161/ENSMUSG00000003283/ENSMUSG00000006699/ENSMUSG00000007655/ENSMUSG00000009073/ENSMUSG00000009292/ENSMUSG00000009376/ENSMUSG00000017144/ENSMUSG00000017774/ENSMUSG00000019997/ENSMUSG00000020120/ENSMUSG00000020388/ENSMUSG00000020580/ENSMUSG00000021262/ENSMUSG00000021313/ENSMUSG00000021589/ENSMUSG00000021886/ENSMUSG00000022443/…	Hip1r/Rac1/Rhoc/Sri/Hck/Cdc42/Cav1/Nf2/Trpm2/Met/Rnd3/Myo1c/Ctgf/Plek/Pdlim4/Rock2/Evl/Ryr2/Rhobtb3/Gpr65/Myh9/Twf1/Nckap1l/Shank3/Rhoq/Csf1r/Arhgdia/Nrp1/Tnnt2/Vangl2/Neb/Nckap1/Pfn2/Tmod1/Pde4b/Pdpn/Stmn1/Fgr/Rhoh/Epha5/Arpc3/Fscn1/Arpc1b/Add2/Vasp/Cyfip1/Cttn/Was/Flna/Gpm6b/Arhgap6/Slit2/Cx3cl1/Jam3/Tmod2/Kank2/Smad3/Nck1/Arap1/Atp1a1/Arhgap44/Dbn1/Kiss1r/C530008M17Rik/Fxyd1/Asap3/Icam1/Plekhg…	98
GO	BP	GO:0018212	peptidyl-tyrosine modification	96/2453	362/17047	7.8846e-10	7.46762e-08	ENSMUSG00000000409/ENSMUSG00000000881/ENSMUSG00000002602/ENSMUSG00000003283/ENSMUSG00000003534/ENSMUSG00000004266/ENSMUSG00000004815/ENSMUSG00000005087/ENSMUSG00000005320/ENSMUSG00000005958/ENSMUSG00000006435/ENSMUSG00000006445/ENSMUSG00000007655/ENSMUSG00000009073/ENSMUSG00000009376/ENSMUSG00000014361/ENSMUSG00000015947/ENSMUSG00000015950/ENSMUSG00000018899/ENSMUSG00000019843/ENSMUSG00000020122/…	Lck/Dlg3/Axl/Hck/Ddr1/Ptpn6/Dgkq/Cd44/Fgfr4/Ephb3/Neurl1a/Epha2/Cav1/Nf2/Met/Mertk/Fcgr1/Ncf1/Irf1/Fyn/Egfr/Efemp1/Sema4d/Syk/Ror2/Thbs4/Il6st/Sla/Enpp2/Twf1/Samsn1/Parp9/Vegfa/Trem2/Eif2ak2/Hbegf/Csf1r/Nrp1/Epha4/Ptprc/Ttl/Ptpn1/Src/Il21/Il6ra/Efna1/Arhgef2/Ntrk1/Fbxw7/Epha7/Ppap2b/Lrp8/Ephb2/Hdac1/Fgr/Epha10/Epha5/Areg/Flt1/Tgfa/Tnfrsf1a/Mvp/Fgfr1/Jak3/Agt/Tyk2/Ctnnd1/Lif/Parp14/Hk1/Zfyve28/Ica…	96
GO	BP	GO:0090130	tissue migration	78/2453	273/17047	7.97887e-10	7.46762e-08	ENSMUSG00000000290/ENSMUSG00000000392/ENSMUSG00000000567/ENSMUSG00000000753/ENSMUSG00000001507/ENSMUSG00000001672/ENSMUSG00000002633/ENSMUSG00000002985/ENSMUSG00000005413/ENSMUSG00000006445/ENSMUSG00000009376/ENSMUSG00000013076/ENSMUSG00000015305/ENSMUSG00000015533/ENSMUSG00000015839/ENSMUSG00000016128/ENSMUSG00000016933/ENSMUSG00000019803/ENSMUSG00000020580/ENSMUSG00000021262/ENSMUSG00000021701/…	Itgb2/Fap/Sox9/Serpinf1/Itga3/Marveld3/Shh/Apoe/Hmox1/Epha2/Met/Amotl1/Sash1/Itga2/Nfe2l2/Stard13/Plcg1/Nr2e1/Rock2/Evl/Plk2/Ptprg/Bmp4/Enpp2/Myh9/Hdac7/Robo1/Smoc2/Vegfa/Cyp1b1/Hbegf/Anxa1/Cd63/Nrp1/Sp100/Zeb2/Dab2ip/Notch1/Itgav/Spred1/Src/Pfn2/Rab13/Efna1/Fbxw7/Epb4.1l4b/Glipr2/P2rx4/Ptn/Plxnd1/Nr2f2/Gpr124/Slit2/Fgfr1/Cdh13/Agt/Ets1/Kank2/Ctsh/Tgfbr2/Card10/Ptprm/Bai1/Prkx/Fgf2/Tgfb2/Thbs1/Am…	78
GO	BP	GO:0001655	urogenital system development	91/2453	337/17047	8.05135e-10	7.46762e-08	ENSMUSG00000000567/ENSMUSG00000000753/ENSMUSG00000001288/ENSMUSG00000001507/ENSMUSG00000001761/ENSMUSG00000002633/ENSMUSG00000004207/ENSMUSG00000004791/ENSMUSG00000005958/ENSMUSG00000006800/ENSMUSG00000014303/ENSMUSG00000014773/ENSMUSG00000015647/ENSMUSG00000015750/ENSMUSG00000016918/ENSMUSG00000017491/ENSMUSG00000019947/ENSMUSG00000019979/ENSMUSG00000020097/ENSMUSG00000020140/ENSMUSG00000020758/…	Sox9/Serpinf1/Rarg/Itga3/Smo/Shh/Psap/Pgf/Ephb3/Sulf2/Glis2/Dll1/Lama5/Aph1a/Sulf1/Rarb/Arid5b/Apaf1/Sgpl1/Lgr5/Itgb4/Gli3/Dlg5/Bmp4/Adamts1/Vegfa/Sox8/Anxa1/Cyp26a1/Plce1/Gdf11/Nrp1/Rdh10/Cflar/Stat1/Epha4/Vangl2/Acvr1/Notch1/Cat/Schip1/Wwtr1/Ampd2/Il6ra/Epha7/Nfia/Ephb2/Anxa4/Ptpro/Col4a1/Slit2/Fgfr1/Hpgd/Smad1/Agt/Kirrel3/Kank2/Myo1e/Stra6/Ctsh/Smad3/Nphp3/Pkd1/Ctnnd1/Lif/Pkd2/Fras1/Lzts2/Prkx…	91
GO	BP	GO:0034341	response to interferon-gamma	48/2453	136/17047	8.32446e-10	7.60215e-08	ENSMUSG00000000982/ENSMUSG00000004626/ENSMUSG00000006699/ENSMUSG00000017774/ENSMUSG00000018899/ENSMUSG00000018927/ENSMUSG00000019122/ENSMUSG00000021262/ENSMUSG00000022906/ENSMUSG00000023460/ENSMUSG00000024397/ENSMUSG00000024411/ENSMUSG00000025278/ENSMUSG00000025491/ENSMUSG00000025492/ENSMUSG00000025888/ENSMUSG00000026104/ENSMUSG00000026696/ENSMUSG00000026712/ENSMUSG00000026946/ENSMUSG00000027995/…	Ccl3/Stxbp2/Cdc42/Myo1c/Irf1/Ccl6/Ccl9/Evl/Parp9/Rab12/Aif1/Aqp4/Flnb/Ifitm1/Ifitm3/Casp1/Stat1/Vamp4/Mrc1/Nmi/Tlr2/Gbp3/Gbp2/Gbp9/Zyx/Trim21/Was/Tlr3/Cx3cl1/Parp14/Ccl12/H2-Aa/A230050P20Rik/Tlr4/Gbp7/Irf8/Cdc42ep4/Bst2/Irgm1/Cited1/5430435G22Rik/Cd47/H2-Q7/Irgm2/H2-Ab1/Nlrc5/Gbp6/Gbp4	48
GO	CC	GO:0030427	site of polarized growth	63/2474	210/17165	4.50425e-09	7.71498e-08	ENSMUSG00000000617/ENSMUSG00000000881/ENSMUSG00000001507/ENSMUSG00000001761/ENSMUSG00000002489/ENSMUSG00000006930/ENSMUSG00000013033/ENSMUSG00000016256/ENSMUSG00000017466/ENSMUSG00000019820/ENSMUSG00000020173/ENSMUSG00000021068/ENSMUSG00000021848/ENSMUSG00000022037/ENSMUSG00000022687/ENSMUSG00000024109/ENSMUSG00000025810/ENSMUSG00000026235/ENSMUSG00000026764/ENSMUSG00000026833/ENSMUSG00000026959/…	Grm6/Dlg3/Itga3/Smo/Tiam1/Hap1/Lphn1/Ctsz/Timp2/Utrn/Cobl/Nin/Otx2/Clu/Boc/Nrxn1/Nrp1/Epha4/Kif5c/Olfm1/Grin1/Itga4/Mapk8ip1/Lamp5/Tpm3/Elavl4/Acap3/Arpc3/Fscn1/Auts2/Exoc4/Cyfip1/Trpm1/Myh14/Cttn/Cdkl5/Flna/Gpm6a/Pvrl1/Fez1/Tmod2/Ptprf/Ctnnd1/Dbn1/Sncb/Shank2/Ppp1r9b/Prex1/Lrp1/Agrn/Crtac1/Nrsn1/Orai1/Flrt3/Ntrk2/Cfl1/Palld/Unc5c/Lrrtm1/Fkbp15/Gprin1/Zfp804a/Cbx6	63
GO	CC	GO:0098982	GABA-ergic synapse	36/2474	92/17165	4.74121e-09	7.91782e-08	ENSMUSG00000004319/ENSMUSG00000006930/ENSMUSG00000007653/ENSMUSG00000010803/ENSMUSG00000019943/ENSMUSG00000020436/ENSMUSG00000021478/ENSMUSG00000024109/ENSMUSG00000024743/ENSMUSG00000025656/ENSMUSG00000030102/ENSMUSG00000030172/ENSMUSG00000030223/ENSMUSG00000030302/ENSMUSG00000030307/ENSMUSG00000030310/ENSMUSG00000031302/ENSMUSG00000031772/ENSMUSG00000031841/ENSMUSG00000033676/ENSMUSG00000033910/…	Clcn3/Hap1/Gabrb2/Gabra1/Atp2b1/Gabrg2/Drd1a/Nrxn1/Syt7/Arhgef9/Itpr1/Erc1/Ptpro/Atp2b2/Slc6a11/Slc6a1/Nlgn3/Cntnap4/Cdh13/Gabrb3/Gucy1a3/Igsf9b/Mdga2/Pcdh17/Gabbr2/Dag1/Magi2/Iqsec3/Kcnd3/Slitrk3/Grm7/Sept11/Flot1/Lrrtm1/Nrxn3/Lrrtm2	36
GO	BP	GO:0002697	regulation of immune effector process	96/2453	363/17047	9.23322e-10	8.3043e-08	ENSMUSG00000000693/ENSMUSG00000001123/ENSMUSG00000002147/ENSMUSG00000004266/ENSMUSG00000004626/ENSMUSG00000005413/ENSMUSG00000009585/ENSMUSG00000009681/ENSMUSG00000015947/ENSMUSG00000016206/ENSMUSG00000016481/ENSMUSG00000016493/ENSMUSG00000017631/ENSMUSG00000017830/ENSMUSG00000018899/ENSMUSG00000019982/ENSMUSG00000019998/ENSMUSG00000020101/ENSMUSG00000020227/ENSMUSG00000020399/ENSMUSG00000020641/…	Loxl3/Lgals9/Stat6/Ptpn6/Stxbp2/Hmox1/Apobec3/Bcr/Fcgr1/H2-M3/Cr1l/Cd46/Abr/Dhx58/Irf1/Myb/Stx7/4632428N05Rik/Irak3/Havcr2/Rsad2/Pld2/Stat5b/Syk/Fam49b/Bcl6/Parp9/Serping1/Parp3/C3/Tap2/Tmem173/Anxa1/Il33/Il1r1/Stat1/Cfh/Ptprc/Rasgrp1/Il21/Tnfrsf1b/Fgr/P2rx7/Zc3hav1/A2m/Lag3/Clec2d/Il4ra/Cd37/Sash3/Was/Tlr3/Cd59a/Rac2/Vav1/Grn/Nfkbiz/H2-Q4/Hk1/Tap1/Arid5a/Cd81/Ddx60/Cd84/Susd4/Tlr4/Tgfb2/Fgl2/Ddx…	96
GO	BP	GO:1903555	regulation of tumor necrosis factor superfamily cytokine production	52/2453	154/17047	1.02746e-09	9.10298e-08	ENSMUSG00000000982/ENSMUSG00000001123/ENSMUSG00000002602/ENSMUSG00000004266/ENSMUSG00000006519/ENSMUSG00000015340/ENSMUSG00000016496/ENSMUSG00000016528/ENSMUSG00000020101/ENSMUSG00000020227/ENSMUSG00000020399/ENSMUSG00000021457/ENSMUSG00000022037/ENSMUSG00000023992/ENSMUSG00000024816/ENSMUSG00000025779/ENSMUSG00000026395/ENSMUSG00000026896/ENSMUSG00000027347/ENSMUSG00000028059/ENSMUSG00000028602/…	Ccl3/Lgals9/Axl/Ptpn6/Cyba/Cybb/Cd274/Mapkapk2/4632428N05Rik/Irak3/Havcr2/Syk/Clu/Trem2/Frmd8/Ly96/Ptprc/Ifih1/Rasgrp1/Arhgef2/Tnfrsf8/Hdac1/Tnfrsf1a/Tyrobp/Trim30a/Sash3/Tlr3/Cx3cl1/Tirap/Myd88/Arid5a/Nod1/Akap12/Tlr4/Thbs1/Ddx58/Tspo/Isl1/Zfp36/Cd24a/Nr1h4/Cd14/Cx3cr1/Cyp2j6/Bcl3/Cd47/Fcer1g/Hmgb1/H2-T23/Syt11/C5ar2/Ccr5	52
GO	BP	GO:0018108	peptidyl-tyrosine phosphorylation	95/2453	359/17047	1.09099e-09	9.41052e-08	ENSMUSG00000000409/ENSMUSG00000000881/ENSMUSG00000002602/ENSMUSG00000003283/ENSMUSG00000003534/ENSMUSG00000004266/ENSMUSG00000004815/ENSMUSG00000005087/ENSMUSG00000005320/ENSMUSG00000005958/ENSMUSG00000006435/ENSMUSG00000006445/ENSMUSG00000007655/ENSMUSG00000009073/ENSMUSG00000009376/ENSMUSG00000014361/ENSMUSG00000015947/ENSMUSG00000015950/ENSMUSG00000018899/ENSMUSG00000019843/ENSMUSG00000020122/…	Lck/Dlg3/Axl/Hck/Ddr1/Ptpn6/Dgkq/Cd44/Fgfr4/Ephb3/Neurl1a/Epha2/Cav1/Nf2/Met/Mertk/Fcgr1/Ncf1/Irf1/Fyn/Egfr/Efemp1/Sema4d/Syk/Ror2/Thbs4/Il6st/Sla/Enpp2/Twf1/Samsn1/Parp9/Vegfa/Trem2/Eif2ak2/Hbegf/Csf1r/Nrp1/Epha4/Ptprc/Ptpn1/Src/Il21/Il6ra/Efna1/Arhgef2/Ntrk1/Fbxw7/Epha7/Ppap2b/Lrp8/Ephb2/Hdac1/Fgr/Epha10/Epha5/Areg/Flt1/Tgfa/Tnfrsf1a/Mvp/Fgfr1/Jak3/Agt/Tyk2/Ctnnd1/Lif/Parp14/Hk1/Zfyve28/Icam1/C…	95
GO	BP	GO:0002221	pattern recognition receptor signaling pathway	48/2453	137/17047	1.10436e-09	9.41052e-08	ENSMUSG00000001123/ENSMUSG00000006519/ENSMUSG00000007655/ENSMUSG00000016528/ENSMUSG00000017830/ENSMUSG00000018899/ENSMUSG00000020227/ENSMUSG00000020399/ENSMUSG00000020641/ENSMUSG00000021709/ENSMUSG00000022901/ENSMUSG00000024349/ENSMUSG00000024927/ENSMUSG00000025017/ENSMUSG00000025498/ENSMUSG00000025779/ENSMUSG00000026883/ENSMUSG00000026896/ENSMUSG00000027995/ENSMUSG00000029826/ENSMUSG00000030921/…	Lgals9/Cyba/Cav1/Mapkapk2/Dhx58/Irf1/Irak3/Havcr2/Rsad2/Erbb2ip/Cd86/Tmem173/Rela/Pik3ap1/Irf7/Ly96/Dab2ip/Ifih1/Tlr2/Zc3hav1/Trim30a/Irak1/Tlr3/Tirap/Myd88/Mapkapk3/Tlr13/Unc93b1/Ddx60/Tlr4/Ddx58/Lyn/Tril/Tlr7/Prkce/Tifa/Nr1h4/Cd14/5430435G22Rik/Trim12c/Flot1/Tnip2/Trim5/Irak2/Hmgb1/Lsm14a/Tspan6/Irgm2	48
GO	BP	GO:0050770	regulation of axonogenesis	60/2453	190/17047	1.10973e-09	9.41052e-08	ENSMUSG00000000627/ENSMUSG00000000861/ENSMUSG00000001227/ENSMUSG00000002489/ENSMUSG00000002985/ENSMUSG00000005958/ENSMUSG00000015342/ENSMUSG00000015829/ENSMUSG00000019647/ENSMUSG00000020132/ENSMUSG00000021068/ENSMUSG00000021451/ENSMUSG00000022883/ENSMUSG00000023328/ENSMUSG00000023905/ENSMUSG00000023951/ENSMUSG00000024304/ENSMUSG00000025207/ENSMUSG00000025810/ENSMUSG00000026193/ENSMUSG00000026235/…	Sema4f/Bcl11a/Sema6b/Tiam1/Apoe/Ephb3/Xk/Tnr/Sema6a/Rab21/Nin/Sema4d/Robo1/Ache/Tnfrsf12a/Vegfa/Cdh2/Sema4g/Nrp1/Fn1/Epha4/Plxna2/Olfm1/Zeb2/Grin1/Ttl/Efna1/Epha7/Dab1/Ephb2/Sema3c/Plxna4/Plxna1/Plxnd1/Cyfip1/Cttn/Cdkl5/Plxna3/Slit2/Mt3/Cacna1a/Dbn1/Plxnb2/Picalm/Lrp1/Agrn/Sipa1l1/Trim46/Tubb2b/Lrrc4b/Ust/Lrrc4c/Amigo1/Robo2/Ntrk2/Map6/Chn1/Sema3e/Rgma/Ccr5	60
GO	BP	GO:0002449	lymphocyte mediated immunity	73/2453	252/17047	1.42599e-09	1.19221e-07	ENSMUSG00000000732/ENSMUSG00000001123/ENSMUSG00000001750/ENSMUSG00000002147/ENSMUSG00000004266/ENSMUSG00000008496/ENSMUSG00000015947/ENSMUSG00000016206/ENSMUSG00000016481/ENSMUSG00000016493/ENSMUSG00000019998/ENSMUSG00000020101/ENSMUSG00000020399/ENSMUSG00000020437/ENSMUSG00000020641/ENSMUSG00000020919/ENSMUSG00000022378/ENSMUSG00000022508/ENSMUSG00000023224/ENSMUSG00000023249/ENSMUSG00000024164/…	Icosl/Lgals9/Tcirg1/Stat6/Ptpn6/Pou2f2/Fcgr1/H2-M3/Cr1l/Cd46/Stx7/4632428N05Rik/Havcr2/Myo1g/Rsad2/Stat5b/Fam49b/Bcl6/Serping1/Parp3/C3/Tap2/Fas/Irf7/Il1r1/Ptprc/Rasgrp1/Il21/Tnfrsf1b/Prdx1/Rnf19b/P2rx7/Lag3/Clec2d/Ctsc/Il4ra/Sash3/Was/Rab27a/Ctsh/Myd88/Vav1/H2-Q4/C1qa/C1qc/C1qb/Tap1/Icam1/Arid5a/Cd81/Susd4/Fgl2/Pvr/Clcf1/Mill2/Cd24a/Igf2/Bcl3/C1ra/H2-T22/Fcer1g/Cfi/H2-Q7/B2m/H2-K1/Pvrl2/Hmgb1/H2…	73
GO	BP	GO:0032944	regulation of mononuclear cell proliferation	63/2453	205/17047	1.46201e-09	1.20535e-07	ENSMUSG00000000732/ENSMUSG00000001123/ENSMUSG00000002633/ENSMUSG00000004266/ENSMUSG00000010142/ENSMUSG00000014599/ENSMUSG00000016206/ENSMUSG00000016493/ENSMUSG00000016496/ENSMUSG00000018899/ENSMUSG00000020101/ENSMUSG00000020399/ENSMUSG00000020612/ENSMUSG00000020919/ENSMUSG00000021457/ENSMUSG00000021756/ENSMUSG00000021782/ENSMUSG00000021835/ENSMUSG00000022488/ENSMUSG00000022508/ENSMUSG00000022885/…	Icosl/Lgals9/Shh/Ptpn6/Tnfrsf13b/Csf1/H2-M3/Cd46/Cd274/Irf1/4632428N05Rik/Havcr2/Prkar1a/Stat5b/Syk/Il6st/Dlg5/Bmp4/Nckap1l/Bcl6/St6gal1/Cd86/Tnfrsf21/Aif1/Anxa1/Gal/Ptprc/Mapk8ip1/Nfatc2/Il21/Il6ra/Vcam1/Tnfrsf1b/Cd38/Tyrobp/Sash3/Efnb1/Casp3/Tgfbr2/Nck1/Myd88/Rac2/Vav3/Tnfsf9/Pawr/Cd276/Lmo1/H2-Aa/Cd81/Tlr4/Clcf1/Lyn/Tnfrsf14/Cd24a/Ccdc88b/Igf2/Lgals3/Rasal3/Cebpb/Erbb2/H2-T23/Cd59b/H2-Ab1	63
GO	BP	GO:0050900	leukocyte migration	84/2453	306/17047	1.52948e-09	1.2437e-07	ENSMUSG00000000290/ENSMUSG00000000957/ENSMUSG00000000982/ENSMUSG00000001123/ENSMUSG00000001847/ENSMUSG00000002897/ENSMUSG00000004791/ENSMUSG00000006699/ENSMUSG00000009292/ENSMUSG00000009681/ENSMUSG00000014599/ENSMUSG00000015533/ENSMUSG00000017631/ENSMUSG00000018927/ENSMUSG00000019122/ENSMUSG00000020437/ENSMUSG00000020919/ENSMUSG00000021194/ENSMUSG00000021457/ENSMUSG00000021464/ENSMUSG00000021508/…	Itgb2/Mmp14/Ccl3/Lgals9/Rac1/Il17ra/Pgf/Cdc42/Trpm2/Bcr/Csf1/Itga2/Abr/Ccl6/Ccl9/Myo1g/Stat5b/Chga/Syk/Ror2/Cxcl14/Thbs4/Nckap1l/Vegfa/Trem2/Aif1/Slc12a2/Anxa1/Il33/Il1r1/Itga4/Vcam1/Pde4b/Edn2/Csf3r/P2rx4/Flt1/Ptn/Add2/Ptpro/Cd9/Msn/Slit2/Cx3cl1/Jam3/Myd88/Slc8b1/Rac2/Vav3/Vav1/Itga2b/Plvap/Cxcl10/Ccl12/Cd99l2/Pawr/P2ry12/Icam1/Cd81/Itga9/Tgfb2/Prex1/Spns2/C3ar1/Nbl1/Cmklr1/Lyn/Hsd3b7/Tnfrsf14/A…	84
GO	BP	GO:0070997	neuron death	99/2453	382/17047	1.63813e-09	1.31405e-07	ENSMUSG00000000120/ENSMUSG00000000753/ENSMUSG00000000982/ENSMUSG00000001761/ENSMUSG00000002083/ENSMUSG00000002602/ENSMUSG00000002633/ENSMUSG00000002985/ENSMUSG00000003378/ENSMUSG00000003849/ENSMUSG00000004040/ENSMUSG00000004056/ENSMUSG00000004263/ENSMUSG00000004891/ENSMUSG00000005413/ENSMUSG00000005656/ENSMUSG00000006699/ENSMUSG00000007653/ENSMUSG00000009292/ENSMUSG00000014077/ENSMUSG00000014599/…	Ngfr/Serpinf1/Ccl3/Smo/Bbc3/Axl/Shh/Apoe/Grik5/Nqo1/Stat3/Akt2/Atn1/Nes/Hmox1/Snx6/Cdc42/Gabrb2/Trpm2/Chp1/Csf1/Ctsz/Arrb1/Fyn/Apaf1/Myb/Adarb1/Chga/Clu/Hdac7/Faim2/Abcc1/Ache/Tnfrsf21/Vegfa/Fas/Nrp1/Casp8/Ncf2/Parp1/Capn2/Nr4a2/Grin1/Ntrk1/Fbxw7/Gclm/Epha7/Tnfrsf1b/Hdac1/Slc9a1/Rest/Chl1/Itpr1/Tnfrsf1a/Tyrobp/Nupr1/Casp3/Mt3/Mt1/Cx3cl1/Aars/Ptprf/Gabrb3/Cacna1a/Grn/Sncb/Ccl12/Pawr/C1qa/Nos1ap/Mc…	99
GO	BP	GO:0050866	negative regulation of cell activation	58/2453	183/17047	1.79458e-09	1.42035e-07	ENSMUSG00000000693/ENSMUSG00000001123/ENSMUSG00000002602/ENSMUSG00000002633/ENSMUSG00000002985/ENSMUSG00000004266/ENSMUSG00000005413/ENSMUSG00000009681/ENSMUSG00000010142/ENSMUSG00000014361/ENSMUSG00000016206/ENSMUSG00000016496/ENSMUSG00000017631/ENSMUSG00000018899/ENSMUSG00000020101/ENSMUSG00000020399/ENSMUSG00000020612/ENSMUSG00000020810/ENSMUSG00000021318/ENSMUSG00000021782/ENSMUSG00000021835/…	Loxl3/Lgals9/Axl/Shh/Apoe/Ptpn6/Hmox1/Bcr/Tnfrsf13b/Mertk/H2-M3/Cd274/Abr/Irf1/4632428N05Rik/Havcr2/Prkar1a/Cygb/Gli3/Dlg5/Bmp4/Bcl6/Samsn1/Cd86/Parp3/Tnfrsf21/Anxa1/Fas/Gal/Serpine2/Pag1/Dtx1/Lag3/Cd9/Tyrobp/Il4ra/Cd37/Casp3/Cx3cl1/Ubash3b/Grn/Pawr/Cd276/H2-Aa/Cd84/Fgl2/Lyn/Tnfrsf14/Cd24a/Zfp608/Prkg1/Fam19a3/Cebpb/Abat/Erbb2/Cst7/H2-Ab1/Nrarp	58
GO	BP	GO:0032680	regulation of tumor necrosis factor production	51/2453	152/17047	1.90441e-09	1.4811e-07	ENSMUSG00000000982/ENSMUSG00000001123/ENSMUSG00000002602/ENSMUSG00000004266/ENSMUSG00000006519/ENSMUSG00000015340/ENSMUSG00000016528/ENSMUSG00000020101/ENSMUSG00000020227/ENSMUSG00000020399/ENSMUSG00000021457/ENSMUSG00000022037/ENSMUSG00000023992/ENSMUSG00000024816/ENSMUSG00000025779/ENSMUSG00000026395/ENSMUSG00000026896/ENSMUSG00000027347/ENSMUSG00000028059/ENSMUSG00000028602/ENSMUSG00000028800/…	Ccl3/Lgals9/Axl/Ptpn6/Cyba/Cybb/Mapkapk2/4632428N05Rik/Irak3/Havcr2/Syk/Clu/Trem2/Frmd8/Ly96/Ptprc/Ifih1/Rasgrp1/Arhgef2/Tnfrsf8/Hdac1/Tnfrsf1a/Tyrobp/Trim30a/Sash3/Tlr3/Cx3cl1/Tirap/Myd88/Arid5a/Nod1/Akap12/Tlr4/Thbs1/Ddx58/Tspo/Isl1/Zfp36/Cd24a/Nr1h4/Cd14/Cx3cr1/Cyp2j6/Bcl3/Cd47/Fcer1g/Hmgb1/H2-T23/Syt11/C5ar2/Ccr5	51
GO	BP	GO:0002758	innate immune response-activating signal transduction	48/2453	139/17047	1.92124e-09	1.4811e-07	ENSMUSG00000001123/ENSMUSG00000006519/ENSMUSG00000007655/ENSMUSG00000016528/ENSMUSG00000017830/ENSMUSG00000018899/ENSMUSG00000020227/ENSMUSG00000020399/ENSMUSG00000020641/ENSMUSG00000021709/ENSMUSG00000022901/ENSMUSG00000024349/ENSMUSG00000024927/ENSMUSG00000025017/ENSMUSG00000025498/ENSMUSG00000025779/ENSMUSG00000026883/ENSMUSG00000026896/ENSMUSG00000027995/ENSMUSG00000029826/ENSMUSG00000030921/…	Lgals9/Cyba/Cav1/Mapkapk2/Dhx58/Irf1/Irak3/Havcr2/Rsad2/Erbb2ip/Cd86/Tmem173/Rela/Pik3ap1/Irf7/Ly96/Dab2ip/Ifih1/Tlr2/Zc3hav1/Trim30a/Irak1/Tlr3/Tirap/Myd88/Mapkapk3/Tlr13/Unc93b1/Ddx60/Tlr4/Ddx58/Lyn/Tril/Tlr7/Prkce/Tifa/Nr1h4/Cd14/5430435G22Rik/Trim12c/Flot1/Tnip2/Trim5/Irak2/Hmgb1/Lsm14a/Tspan6/Irgm2	48
GO	BP	GO:0010632	regulation of epithelial cell migration	64/2453	211/17047	1.95472e-09	1.48759e-07	ENSMUSG00000000567/ENSMUSG00000000753/ENSMUSG00000001507/ENSMUSG00000001672/ENSMUSG00000002633/ENSMUSG00000002985/ENSMUSG00000005413/ENSMUSG00000006445/ENSMUSG00000009376/ENSMUSG00000013076/ENSMUSG00000015305/ENSMUSG00000015533/ENSMUSG00000015839/ENSMUSG00000016128/ENSMUSG00000016933/ENSMUSG00000019803/ENSMUSG00000020580/ENSMUSG00000021262/ENSMUSG00000021701/ENSMUSG00000021745/ENSMUSG00000021835/…	Sox9/Serpinf1/Itga3/Marveld3/Shh/Apoe/Hmox1/Epha2/Met/Amotl1/Sash1/Itga2/Nfe2l2/Stard13/Plcg1/Nr2e1/Rock2/Evl/Plk2/Ptprg/Bmp4/Enpp2/Hdac7/Smoc2/Vegfa/Hbegf/Anxa1/Cd63/Nrp1/Sp100/Dab2ip/Notch1/Spred1/Src/Pfn2/Efna1/Fbxw7/Epb4.1l4b/Glipr2/Ppap2b/P2rx4/Ptn/Nr2f2/Gpr124/Slit2/Fgfr1/Agt/Ets1/Ctsh/Tgfbr2/Card10/Ptprm/Bai1/Fgf2/Tgfb2/Thbs1/Amot/Arsb/Prkce/Rhoj/Igf2/Jun/Dock1/Kdr	64
GO	BP	GO:0070661	leukocyte proliferation	80/2453	288/17047	2.06343e-09	1.55045e-07	ENSMUSG00000000732/ENSMUSG00000001123/ENSMUSG00000001750/ENSMUSG00000002633/ENSMUSG00000004266/ENSMUSG00000010142/ENSMUSG00000014599/ENSMUSG00000016206/ENSMUSG00000016493/ENSMUSG00000016496/ENSMUSG00000018899/ENSMUSG00000019843/ENSMUSG00000020101/ENSMUSG00000020143/ENSMUSG00000020399/ENSMUSG00000020612/ENSMUSG00000020919/ENSMUSG00000021457/ENSMUSG00000021624/ENSMUSG00000021756/ENSMUSG00000021782/…	Icosl/Lgals9/Tcirg1/Shh/Ptpn6/Tnfrsf13b/Csf1/H2-M3/Cd46/Cd274/Irf1/Fyn/4632428N05Rik/Dock2/Havcr2/Prkar1a/Stat5b/Syk/Cd180/Il6st/Dlg5/Bmp4/Clu/Nckap1l/Bcl6/St6gal1/Cd86/Tnfrsf21/Trem2/Aif1/Csf1r/Anxa1/Il33/Gal/Cd151/Ptprc/Mapk8ip1/Nfatc2/Il21/Il6ra/Vcam1/Tnfrsf1b/Cd38/P2rx7/Tyrobp/Sash3/Msn/Efnb1/Casp3/Il34/Cx3cl1/Psmb10/Tgfbr2/Nck1/Myd88/Rac2/Vav3/Ccnd3/Ccl12/Tnfsf9/Pawr/Cd276/Lmo1/H2-Aa/Cd81/Pl…	80
GO	BP	GO:0019882	antigen processing and presentation	35/2453	86/17047	2.15907e-09	1.60203e-07	ENSMUSG00000002983/ENSMUSG00000015947/ENSMUSG00000016206/ENSMUSG00000018774/ENSMUSG00000021583/ENSMUSG00000021686/ENSMUSG00000022216/ENSMUSG00000023992/ENSMUSG00000024308/ENSMUSG00000024338/ENSMUSG00000024339/ENSMUSG00000026471/ENSMUSG00000029518/ENSMUSG00000031165/ENSMUSG00000032202/ENSMUSG00000035929/ENSMUSG00000036594/ENSMUSG00000036943/ENSMUSG00000037321/ENSMUSG00000037405/ENSMUSG00000038058/…	Relb/Fcgr1/H2-M3/Cd68/Erap1/Ap3b1/Psme1/Trem2/Tapbp/Psmb8/Tap2/Mr1/Rab35/Was/Rab27a/H2-Q4/H2-Aa/Rab8b/Tap1/Icam1/Nod1/Tapbpl/Ctss/Fgl2/Thbs1/H2-T22/Fcer1g/H2-Q7/H2-Eb1/B2m/H2-K1/H2-T23/H2-Q6/H2-D1/H2-Ab1	35
GO	BP	GO:0035249	synaptic transmission, glutamatergic	37/2453	94/17047	2.28979e-09	1.67805e-07	ENSMUSG00000000617/ENSMUSG00000001985/ENSMUSG00000003378/ENSMUSG00000004319/ENSMUSG00000015829/ENSMUSG00000017412/ENSMUSG00000020122/ENSMUSG00000020723/ENSMUSG00000021448/ENSMUSG00000021464/ENSMUSG00000021478/ENSMUSG00000022619/ENSMUSG00000022623/ENSMUSG00000024109/ENSMUSG00000024304/ENSMUSG00000025892/ENSMUSG00000026249/ENSMUSG00000026959/ENSMUSG00000028072/ENSMUSG00000030898/ENSMUSG00000031214/…	Grm6/Grik3/Grik5/Clcn3/Tnr/Cacnb4/Egfr/Cacng4/Shc3/Ror2/Drd1a/Mapk8ip2/Shank3/Nrxn1/Cdh2/Gria4/Serpine2/Grin1/Ntrk1/Cckbr/Ophn1/Nlgn3/Plat/Cacna1a/Syt1/Cdh8/Shank2/Dgki/Shank1/Cacng5/Adora1/Reln/Ntrk2/Grik2/Grm7/Nlgn1/Grid2	37
GO	BP	GO:0072503	cellular divalent inorganic cation homeostasis	118/2453	484/17047	2.44801e-09	1.77212e-07	ENSMUSG00000000409/ENSMUSG00000000682/ENSMUSG00000000982/ENSMUSG00000001750/ENSMUSG00000002083/ENSMUSG00000002985/ENSMUSG00000003161/ENSMUSG00000003352/ENSMUSG00000004113/ENSMUSG00000004266/ENSMUSG00000006519/ENSMUSG00000006930/ENSMUSG00000007655/ENSMUSG00000009292/ENSMUSG00000010660/ENSMUSG00000013275/ENSMUSG00000015342/ENSMUSG00000015968/ENSMUSG00000016933/ENSMUSG00000017412/ENSMUSG00000018340/…	Lck/Cd52/Ccl3/Tcirg1/Bbc3/Apoe/Sri/Cacnb3/Cacna1b/Ptpn6/Cyba/Hap1/Cav1/Trpm2/Plcd1/Slc41a1/Xk/Cacna1d/Plcg1/Cacnb4/Anxa6/Fyn/Atp2b1/Gria1/Pik3cg/Cacna1g/Akap5/Chga/Ryr2/Drd1a/Hexb/Il6st/Anxa7/Bmp4/Micu2/Jph4/Atp13a3/Npff/Afg3l2/Plce1/Jph3/Dbi/Ptprc/Atp2b4/Grin1/Itgav/Anxa5/Ptgfr/Asph/Edn2/Cd38/Tmem165/P2rx7/P2rx4/Itpr1/Erc1/Atp2b2/Trpm1/Calca/Cckbr/Rasa3/Mt3/Mt2/Mt1/Herpud1/Cx3cl1/Agt/Ubash3b/Sma…	118
GO	BP	GO:0051961	negative regulation of nervous system development	88/2453	329/17047	2.53834e-09	1.80186e-07	ENSMUSG00000000247/ENSMUSG00000000567/ENSMUSG00000000627/ENSMUSG00000000861/ENSMUSG00000001227/ENSMUSG00000001521/ENSMUSG00000002633/ENSMUSG00000002985/ENSMUSG00000004040/ENSMUSG00000006958/ENSMUSG00000007655/ENSMUSG00000014773/ENSMUSG00000015829/ENSMUSG00000016256/ENSMUSG00000019647/ENSMUSG00000019803/ENSMUSG00000020393/ENSMUSG00000020467/ENSMUSG00000020932/ENSMUSG00000021318/ENSMUSG00000021451/…	Lhx2/Sox9/Sema4f/Bcl11a/Sema6b/Tulp3/Shh/Apoe/Stat3/Chrd/Cav1/Dll1/Tnr/Ctsz/Sema6a/Nr2e1/Kremen1/Efemp1/Gfap/Gli3/Sema4d/Plk2/Ptprg/Bmp4/Il15ra/Tnfrsf21/Sox8/Syt4/Fas/Sema4g/Gdf11/Fuom/Nrp1/Map4k4/Ctdsp1/Itm2c/Epha4/Rab29/Notch1/Pax6/Efna1/Arhgef2/Epha7/Dab1/Ephb2/Sema3c/Cd38/Rest/Dtx1/Ptn/Ctsc/Nlgn3/Flna/Plxna3/Slit2/Mt3/Inppl1/Tmem98/Prtg/Zfp365/Atf5/Six3/Lrp1/Rap1gap/Tspo/Inpp5f/Isl1/Trim46/29…	88
GO	BP	GO:0006816	calcium ion transport	105/2453	416/17047	2.54981e-09	1.80186e-07	ENSMUSG00000000409/ENSMUSG00000000617/ENSMUSG00000000982/ENSMUSG00000002083/ENSMUSG00000003161/ENSMUSG00000003352/ENSMUSG00000004113/ENSMUSG00000004266/ENSMUSG00000006519/ENSMUSG00000006930/ENSMUSG00000007655/ENSMUSG00000009292/ENSMUSG00000010066/ENSMUSG00000015968/ENSMUSG00000016933/ENSMUSG00000017400/ENSMUSG00000017412/ENSMUSG00000018340/ENSMUSG00000019843/ENSMUSG00000019943/ENSMUSG00000019982/…	Lck/Grm6/Ccl3/Bbc3/Sri/Cacnb3/Cacna1b/Ptpn6/Cyba/Hap1/Cav1/Trpm2/Cacna2d2/Cacna1d/Plcg1/Stac2/Cacnb4/Anxa6/Fyn/Atp2b1/Myb/Ctgf/Pik3cg/Tspan13/Cacng4/Cacna1g/Akap5/Ryr2/Drd1a/Camk2g/Bmp4/Micu2/Jph4/Asic1/Ehd3/Cacna1h/Afg3l2/Plce1/Jph3/Homer2/Dbi/Ptprc/Atp2b4/Grin1/Itgav/Anxa5/Asph/Gem/Clca3/Pde4b/Hpca/Slc9a1/Tmem165/P2rx7/P2rx4/Itpr1/Atp2b2/Trpm1/Rasa3/Gpm6a/Gnao1/Cx3cl1/Agt/Ubash3b/Gnai2/Slc8b1/P…	105
GO	BP	GO:0048880	sensory system development	96/2453	370/17047	2.71335e-09	1.8507e-07	ENSMUSG00000000247/ENSMUSG00000000567/ENSMUSG00000000617/ENSMUSG00000000753/ENSMUSG00000001288/ENSMUSG00000001521/ENSMUSG00000001750/ENSMUSG00000002633/ENSMUSG00000004040/ENSMUSG00000004891/ENSMUSG00000006445/ENSMUSG00000009073/ENSMUSG00000012609/ENSMUSG00000014361/ENSMUSG00000014773/ENSMUSG00000017491/ENSMUSG00000017639/ENSMUSG00000019803/ENSMUSG00000019943/ENSMUSG00000020122/ENSMUSG00000020467/…	Lhx2/Sox9/Grm6/Serpinf1/Rarg/Tulp3/Tcirg1/Shh/Stat3/Nes/Epha2/Nf2/Ttll5/Mertk/Dll1/Rarb/Rab11fip4/Nr2e1/Atp2b1/Egfr/Efemp1/Six6/Vsx2/Gli3/Agtpbp1/Lpcat1/Bmp4/Pvrl3/Arl6/Ache/Vegfa/Man2a1/Cyp1b1/C3/Sox8/Celf4/Lrp5/Pde6c/Gdf11/Nrp1/Rdh10/Atp2b4/Col5a1/Zeb2/Pax6/Rpe65/Tmod1/Ephb2/Hpca/Hdac1/Smarcd3/Foxp2/Ptn/Gdf3/Trpm1/Chrdl1/Col4a1/Gpm6a/Pvrl1/Stra6/Smad3/Tgfbr2/Ptprm/Lif/Neurod1/P2ry12/C1qa/Inhbb/…	96
GO	BP	GO:0007266	Rho protein signal transduction	60/2453	194/17047	2.72439e-09	1.8507e-07	ENSMUSG00000000120/ENSMUSG00000001507/ENSMUSG00000001847/ENSMUSG00000002233/ENSMUSG00000002489/ENSMUSG00000002985/ENSMUSG00000004562/ENSMUSG00000006699/ENSMUSG00000009376/ENSMUSG00000009681/ENSMUSG00000015243/ENSMUSG00000017144/ENSMUSG00000017631/ENSMUSG00000018909/ENSMUSG00000020580/ENSMUSG00000021215/ENSMUSG00000021589/ENSMUSG00000021662/ENSMUSG00000021895/ENSMUSG00000022263/ENSMUSG00000022508/…	Ngfr/Itga3/Rac1/Rhoc/Tiam1/Apoe/Arhgef40/Cdc42/Met/Bcr/Abca1/Rnd3/Abr/Arrb1/Rock2/Net1/Rhobtb3/Arhgef28/Arhgef3/Trio/Bcl6/Robo1/Fgd2/Rhoq/Cdh2/Arhgdia/Farp1/Arhgef9/Nrp1/Vangl2/Arhgef2/Pdpn/Stmn1/Cnksr1/Rhoh/Arhgef6/Was/Ophn1/Cdh13/Kank2/Arhgef17/Rac2/Vav3/Vav1/Arhgef4/Plekhg2/Plekhg6/Ctnnal1/Prex1/Rhou/Cdc42ep4/Arhgef37/Cdc42se1/Rhoj/Prex2/D8Ertd82e/Arhgap42/Rit2/Flot1/Arhgef10	60
GO	BP	GO:0022409	positive regulation of cell-cell adhesion	66/2453	222/17047	2.73275e-09	1.8507e-07	ENSMUSG00000000409/ENSMUSG00000000732/ENSMUSG00000001123/ENSMUSG00000002633/ENSMUSG00000005087/ENSMUSG00000007655/ENSMUSG00000007817/ENSMUSG00000016206/ENSMUSG00000016493/ENSMUSG00000016496/ENSMUSG00000018899/ENSMUSG00000019982/ENSMUSG00000020101/ENSMUSG00000020399/ENSMUSG00000020919/ENSMUSG00000021318/ENSMUSG00000021457/ENSMUSG00000021686/ENSMUSG00000021756/ENSMUSG00000022272/ENSMUSG00000022378/…	Lck/Icosl/Lgals9/Shh/Cd44/Cav1/Zmiz1/H2-M3/Cd46/Cd274/Irf1/Myb/4632428N05Rik/Havcr2/Stat5b/Gli3/Syk/Ap3b1/Il6st/Myo10/Fam49b/Nckap1l/Bcl6/Cd86/Aif1/Anxa1/Rela/Ptprc/Itga4/Rasgrp1/Il21/Il6ra/Vcam1/Ppap2b/Pdpn/Il4ra/Sash3/Efnb1/Irak1/Cx3cl1/Ets1/Tgfbr2/Nck1/Nfkbiz/Tnfsf9/Pawr/Cd276/H2-Aa/Icam1/Cd81/Rap1gap/Tnfrsf14/Cd24a/Ccdc88b/Igf2/Rasal3/Cd47/Flot1/Flot2/H2-T23/Lgals1/Cd59b/Ank3/H2-Ab1/Sox2/Ccr5	66
GO	BP	GO:0042552	myelination	47/2453	136/17047	2.74363e-09	1.8507e-07	ENSMUSG00000001288/ENSMUSG00000004056/ENSMUSG00000004207/ENSMUSG00000015342/ENSMUSG00000017167/ENSMUSG00000017491/ENSMUSG00000017929/ENSMUSG00000019843/ENSMUSG00000020758/ENSMUSG00000021665/ENSMUSG00000022037/ENSMUSG00000023915/ENSMUSG00000024044/ENSMUSG00000024304/ENSMUSG00000024527/ENSMUSG00000027010/ENSMUSG00000027375/ENSMUSG00000027995/ENSMUSG00000028599/ENSMUSG00000029838/ENSMUSG00000030342/…	Rarg/Akt2/Psap/Xk/Cntnap1/Rarb/B4galt5/Fyn/Itgb4/Hexb/Clu/Tnfrsf21/Epb4.1l3/Cdh2/Afg3l2/Slc25a12/Mal/Tlr2/Tnfrsf1b/Ptn/Cd9/Ctsc/Itgax/Jam3/Trf/Gpc1/Tmem98/Myrf/Lgi4/Egr2/Gpr126/Dag1/Adam22/Kif14/Mbp/Marveld1/Zfp488/Kcnj10/Sh3tc2/Tenm4/Amigo1/Ntrk2/B4galt6/Qk/Erbb2/Cst7/Arhgef10	47
GO	BP	GO:0071706	tumor necrosis factor superfamily cytokine production	52/2453	158/17047	2.85043e-09	1.90114e-07	ENSMUSG00000000982/ENSMUSG00000001123/ENSMUSG00000002602/ENSMUSG00000004266/ENSMUSG00000006519/ENSMUSG00000015340/ENSMUSG00000016496/ENSMUSG00000016528/ENSMUSG00000020101/ENSMUSG00000020227/ENSMUSG00000020399/ENSMUSG00000021457/ENSMUSG00000022037/ENSMUSG00000023992/ENSMUSG00000024816/ENSMUSG00000025779/ENSMUSG00000026395/ENSMUSG00000026896/ENSMUSG00000027347/ENSMUSG00000028059/ENSMUSG00000028602/…	Ccl3/Lgals9/Axl/Ptpn6/Cyba/Cybb/Cd274/Mapkapk2/4632428N05Rik/Irak3/Havcr2/Syk/Clu/Trem2/Frmd8/Ly96/Ptprc/Ifih1/Rasgrp1/Arhgef2/Tnfrsf8/Hdac1/Tnfrsf1a/Tyrobp/Trim30a/Sash3/Tlr3/Cx3cl1/Tirap/Myd88/Arid5a/Nod1/Akap12/Tlr4/Thbs1/Ddx58/Tspo/Isl1/Zfp36/Cd24a/Nr1h4/Cd14/Cx3cr1/Cyp2j6/Bcl3/Cd47/Fcer1g/Hmgb1/H2-T23/Syt11/C5ar2/Ccr5	52
GO	BP	GO:0060041	retina development in camera-type eye	49/2453	145/17047	2.99942e-09	1.97829e-07	ENSMUSG00000000247/ENSMUSG00000000567/ENSMUSG00000000617/ENSMUSG00000000753/ENSMUSG00000001750/ENSMUSG00000012609/ENSMUSG00000014361/ENSMUSG00000014773/ENSMUSG00000017639/ENSMUSG00000019803/ENSMUSG00000019943/ENSMUSG00000021239/ENSMUSG00000021557/ENSMUSG00000021608/ENSMUSG00000022656/ENSMUSG00000022722/ENSMUSG00000023328/ENSMUSG00000024085/ENSMUSG00000024087/ENSMUSG00000024176/ENSMUSG00000024268/…	Lhx2/Sox9/Grm6/Serpinf1/Tcirg1/Ttll5/Mertk/Dll1/Rab11fip4/Nr2e1/Atp2b1/Vsx2/Agtpbp1/Lpcat1/Pvrl3/Arl6/Ache/Man2a1/Cyp1b1/Sox8/Celf4/Lrp5/Pde6c/Nrp1/Atp2b4/Pax6/Rpe65/Hpca/Smarcd3/Ptn/Col4a1/Gpm6a/Pvrl1/Ptprm/Lif/Neurod1/Six3/Tgfb2/Sdk1/Ndp/Sdk2/Rhoj/Neurod4/Bmpr1b/Lamb2/Ntrk2/Acvr2b/Slc4a5/Fjx1	49
GO	BP	GO:0002694	regulation of leukocyte activation	114/2453	465/17047	3.25872e-09	2.10441e-07	ENSMUSG00000000409/ENSMUSG00000000693/ENSMUSG00000000732/ENSMUSG00000000957/ENSMUSG00000001123/ENSMUSG00000002147/ENSMUSG00000002602/ENSMUSG00000002633/ENSMUSG00000004266/ENSMUSG00000004626/ENSMUSG00000005413/ENSMUSG00000007655/ENSMUSG00000007817/ENSMUSG00000009681/ENSMUSG00000010142/ENSMUSG00000014361/ENSMUSG00000016206/ENSMUSG00000016493/ENSMUSG00000016496/ENSMUSG00000017631/ENSMUSG00000018899/…	Lck/Loxl3/Icosl/Mmp14/Lgals9/Stat6/Axl/Shh/Ptpn6/Stxbp2/Hmox1/Cav1/Zmiz1/Bcr/Tnfrsf13b/Mertk/H2-M3/Cd46/Cd274/Abr/Irf1/Myb/4632428N05Rik/Havcr2/Prkar1a/Pld2/Stat5b/Zfp36l1/Gli3/Syk/Ap3b1/Il6st/Dlg5/Bmp4/Fam49b/Nckap1l/Bcl6/Samsn1/Cd86/Il15ra/Parp3/Tnfrsf21/Trem2/Aif1/Anxa1/Fas/Il33/Gal/Ptprc/Mapk8ip1/Rasgrp1/Pag1/Nfatc2/Il21/Il6ra/Vcam1/Tnfrsf1b/Fgr/Cd38/Dtx1/Lag3/Ctsc/Tyrobp/Il4ra/Cd37/Sash3/Efn…	114
GO	BP	GO:0031644	regulation of neurological system process	53/2453	163/17047	3.26155e-09	2.10441e-07	ENSMUSG00000000263/ENSMUSG00000000326/ENSMUSG00000000982/ENSMUSG00000003352/ENSMUSG00000015533/ENSMUSG00000015829/ENSMUSG00000020723/ENSMUSG00000022494/ENSMUSG00000022623/ENSMUSG00000022790/ENSMUSG00000023052/ENSMUSG00000023915/ENSMUSG00000024109/ENSMUSG00000024268/ENSMUSG00000026959/ENSMUSG00000027010/ENSMUSG00000027646/ENSMUSG00000028599/ENSMUSG00000028854/ENSMUSG00000030098/ENSMUSG00000030560/…	Glra1/Comt/Ccl3/Cacnb3/Itga2/Tnr/Cacng4/Shisa9/Shank3/Igsf11/Npff/Tnfrsf21/Nrxn1/Celf4/Grin1/Slc25a12/Src/Tnfrsf1b/Slc9a1/Grip2/Ctsc/Itgax/Cckbr/Nlgn3/Fgfr1/Agt/Trf/Igsf9b/Dbn1/Chrnb4/Tmem98/Pawr/Myrf/Shank2/Ctss/Shank1/Tlr4/Dag1/Cacng5/Adora1/Reln/Cux2/S1pr2/Zfp488/Kcnj10/Tenm4/Neto1/Shisa6/Abat/Fcgr4/Nlgn1/Cst7/B230216G23Rik	53
GO	BP	GO:0031589	cell-substrate adhesion	87/2453	326/17047	3.51896e-09	2.24608e-07	ENSMUSG00000000290/ENSMUSG00000000957/ENSMUSG00000001507/ENSMUSG00000001847/ENSMUSG00000001930/ENSMUSG00000002489/ENSMUSG00000002602/ENSMUSG00000003534/ENSMUSG00000005958/ENSMUSG00000006699/ENSMUSG00000009681/ENSMUSG00000014361/ENSMUSG00000014599/ENSMUSG00000015533/ENSMUSG00000015647/ENSMUSG00000019820/ENSMUSG00000019997/ENSMUSG00000020019/ENSMUSG00000020437/ENSMUSG00000020758/ENSMUSG00000022026/…	Itgb2/Mmp14/Itga3/Rac1/Vwf/Tiam1/Axl/Ddr1/Ephb3/Cdc42/Bcr/Mertk/Csf1/Itga2/Lama5/Utrn/Ctgf/Ntn4/Myo1g/Itgb4/Olfm4/Ajuba/Enpp2/Parvb/Bcl6/Mfi2/St6gal1/Smoc2/Tnfrsf12a/Vegfa/Vit/Fermt3/Ptprj/Itgb8/Cd63/Nrp1/Fn1/Rsu1/Notch1/Itga4/Itgav/Src/Efna1/Vcam1/Adam15/Cyr61/Pdpn/Ptn/Zyx/Parva/Cttn/Flna/Gpm6b/Arhgap6/L1cam/Cdh13/Jam3/Smad3/Triobp/Rac2/Tnxb/Itga2b/Dbn1/Prkx/Micall2/Fermt2/Limch1/Srcin1/Prex1/Da…	87
GO	BP	GO:0097529	myeloid leukocyte migration	56/2453	177/17047	3.65332e-09	2.30671e-07	ENSMUSG00000000957/ENSMUSG00000000982/ENSMUSG00000001847/ENSMUSG00000002897/ENSMUSG00000004791/ENSMUSG00000014599/ENSMUSG00000018927/ENSMUSG00000019122/ENSMUSG00000020919/ENSMUSG00000021194/ENSMUSG00000021457/ENSMUSG00000021464/ENSMUSG00000021702/ENSMUSG00000022488/ENSMUSG00000023951/ENSMUSG00000023992/ENSMUSG00000024397/ENSMUSG00000024659/ENSMUSG00000026072/ENSMUSG00000028525/ENSMUSG00000028635/…	Mmp14/Ccl3/Rac1/Il17ra/Pgf/Csf1/Ccl6/Ccl9/Stat5b/Chga/Syk/Ror2/Thbs4/Nckap1l/Vegfa/Trem2/Aif1/Anxa1/Il1r1/Pde4b/Edn2/Csf3r/P2rx4/Flt1/Ptpro/Cd9/Slit2/Cx3cl1/Jam3/Myd88/Rac2/Vav3/Vav1/Cxcl10/Ccl12/Cd99l2/Pawr/P2ry12/Cd81/Itga9/Tgfb2/Prex1/C3ar1/Nbl1/Cmklr1/Lyn/C5ar1/Lgals3/Cd47/Prtn3/Fcer1g/Irak4/Mospd2/Mapk3/Ano6/C5ar2	56
GO	BP	GO:0070838	divalent metal ion transport	114/2453	466/17047	3.71603e-09	2.30671e-07	ENSMUSG00000000409/ENSMUSG00000000617/ENSMUSG00000000982/ENSMUSG00000002083/ENSMUSG00000003161/ENSMUSG00000003352/ENSMUSG00000004113/ENSMUSG00000004266/ENSMUSG00000006519/ENSMUSG00000006930/ENSMUSG00000007655/ENSMUSG00000009292/ENSMUSG00000010066/ENSMUSG00000013275/ENSMUSG00000015968/ENSMUSG00000016933/ENSMUSG00000017400/ENSMUSG00000017412/ENSMUSG00000018340/ENSMUSG00000019843/ENSMUSG00000019943/…	Lck/Grm6/Ccl3/Bbc3/Sri/Cacnb3/Cacna1b/Ptpn6/Cyba/Hap1/Cav1/Trpm2/Cacna2d2/Slc41a1/Cacna1d/Plcg1/Stac2/Cacnb4/Anxa6/Fyn/Atp2b1/Myb/Ctgf/Pik3cg/Tspan13/Cacng4/Cacna1g/Akap5/Ryr2/Drd1a/Ap3b1/Camk2g/Bmp4/Micu2/Jph4/Asic1/Ehd3/Cacna1h/Afg3l2/Plce1/Jph3/Homer2/Dbi/Ptprc/Atp2b4/Grin1/Itgav/Anxa5/Asph/Gem/Clca3/Pde4b/Hpca/Slc9a1/Tmem165/P2rx7/P2rx4/Itpr1/Atp2b2/Trpm1/Rasa3/Gpm6a/Gnao1/Mt3/Cx3cl1/Agt/Ubas…	114
GO	BP	GO:0150063	visual system development	95/2453	367/17047	3.73052e-09	2.30671e-07	ENSMUSG00000000247/ENSMUSG00000000567/ENSMUSG00000000617/ENSMUSG00000000753/ENSMUSG00000001288/ENSMUSG00000001521/ENSMUSG00000001750/ENSMUSG00000002633/ENSMUSG00000004040/ENSMUSG00000004891/ENSMUSG00000006445/ENSMUSG00000009073/ENSMUSG00000012609/ENSMUSG00000014361/ENSMUSG00000014773/ENSMUSG00000017491/ENSMUSG00000017639/ENSMUSG00000019803/ENSMUSG00000019943/ENSMUSG00000020122/ENSMUSG00000020467/…	Lhx2/Sox9/Grm6/Serpinf1/Rarg/Tulp3/Tcirg1/Shh/Stat3/Nes/Epha2/Nf2/Ttll5/Mertk/Dll1/Rarb/Rab11fip4/Nr2e1/Atp2b1/Egfr/Efemp1/Six6/Vsx2/Gli3/Agtpbp1/Lpcat1/Bmp4/Pvrl3/Arl6/Ache/Vegfa/Man2a1/Cyp1b1/C3/Sox8/Celf4/Lrp5/Pde6c/Gdf11/Nrp1/Rdh10/Atp2b4/Col5a1/Zeb2/Pax6/Rpe65/Tmod1/Ephb2/Hpca/Hdac1/Smarcd3/Foxp2/Ptn/Gdf3/Trpm1/Chrdl1/Col4a1/Gpm6a/Pvrl1/Stra6/Smad3/Tgfbr2/Ptprm/Lif/Neurod1/P2ry12/C1qa/Inhbb/…	95
GO	BP	GO:0006874	cellular calcium ion homeostasis	113/2453	461/17047	3.86083e-09	2.36267e-07	ENSMUSG00000000409/ENSMUSG00000000682/ENSMUSG00000000982/ENSMUSG00000001750/ENSMUSG00000002083/ENSMUSG00000002985/ENSMUSG00000003161/ENSMUSG00000003352/ENSMUSG00000004113/ENSMUSG00000004266/ENSMUSG00000006519/ENSMUSG00000006930/ENSMUSG00000007655/ENSMUSG00000009292/ENSMUSG00000010660/ENSMUSG00000015342/ENSMUSG00000015968/ENSMUSG00000016933/ENSMUSG00000017412/ENSMUSG00000018340/ENSMUSG00000019843/…	Lck/Cd52/Ccl3/Tcirg1/Bbc3/Apoe/Sri/Cacnb3/Cacna1b/Ptpn6/Cyba/Hap1/Cav1/Trpm2/Plcd1/Xk/Cacna1d/Plcg1/Cacnb4/Anxa6/Fyn/Atp2b1/Gria1/Pik3cg/Cacna1g/Akap5/Chga/Ryr2/Drd1a/Hexb/Il6st/Anxa7/Bmp4/Micu2/Jph4/Atp13a3/Npff/Afg3l2/Plce1/Jph3/Dbi/Ptprc/Atp2b4/Grin1/Itgav/Anxa5/Ptgfr/Asph/Edn2/Cd38/Tmem165/P2rx7/P2rx4/Itpr1/Erc1/Atp2b2/Trpm1/Calca/Cckbr/Rasa3/Herpud1/Cx3cl1/Agt/Ubash3b/Smad3/Pth1r/Pygm/Slc8b1…	113
GO	MF	GO:0005539	glycosaminoglycan binding	60/2478	185/17092	4.62494e-10	2.45122e-07	ENSMUSG00000002633/ENSMUSG00000002985/ENSMUSG00000005087/ENSMUSG00000005320/ENSMUSG00000006651/ENSMUSG00000006800/ENSMUSG00000006958/ENSMUSG00000016918/ENSMUSG00000018340/ENSMUSG00000019997/ENSMUSG00000021702/ENSMUSG00000021835/ENSMUSG00000022893/ENSMUSG00000022894/ENSMUSG00000023886/ENSMUSG00000023951/ENSMUSG00000023992/ENSMUSG00000024076/ENSMUSG00000024486/ENSMUSG00000025810/ENSMUSG00000025969/…	Shh/Apoe/Cd44/Fgfr4/Aplp1/Sulf2/Chrd/Sulf1/Anxa6/Ctgf/Thbs4/Bmp4/Adamts1/Adamts5/Smoc2/Vegfa/Trem2/Vit/Hbegf/Nrp1/Nrp2/Fn1/Serpine2/Cfh/Ptprc/Col5a1/Anxa5/Extl2/Col11a1/Tlr2/Cyr61/Lrpap1/Tgfbr3/Pcolce/Ptn/Anxa4/Slit2/Fgfr1/Tgfbr2/Ptprf/Tnxb/Cxcl10/Impg2/Hk1/Fgf2/Eva1c/Thbs1/Prelp/Agrn/Adamtsl5/Rtn4rl1/Lrtm1/Ndnf/Grem2/Nav2/Tnfaip6/Col25a1/Col23a1/Hmgb1/Ighm	60
GO	BP	GO:0032640	tumor necrosis factor production	51/2453	155/17047	4.07401e-09	2.46768e-07	ENSMUSG00000000982/ENSMUSG00000001123/ENSMUSG00000002602/ENSMUSG00000004266/ENSMUSG00000006519/ENSMUSG00000015340/ENSMUSG00000016528/ENSMUSG00000020101/ENSMUSG00000020227/ENSMUSG00000020399/ENSMUSG00000021457/ENSMUSG00000022037/ENSMUSG00000023992/ENSMUSG00000024816/ENSMUSG00000025779/ENSMUSG00000026395/ENSMUSG00000026896/ENSMUSG00000027347/ENSMUSG00000028059/ENSMUSG00000028602/ENSMUSG00000028800/…	Ccl3/Lgals9/Axl/Ptpn6/Cyba/Cybb/Mapkapk2/4632428N05Rik/Irak3/Havcr2/Syk/Clu/Trem2/Frmd8/Ly96/Ptprc/Ifih1/Rasgrp1/Arhgef2/Tnfrsf8/Hdac1/Tnfrsf1a/Tyrobp/Trim30a/Sash3/Tlr3/Cx3cl1/Tirap/Myd88/Arid5a/Nod1/Akap12/Tlr4/Thbs1/Ddx58/Tspo/Isl1/Zfp36/Cd24a/Nr1h4/Cd14/Cx3cr1/Cyp2j6/Bcl3/Cd47/Fcer1g/Hmgb1/H2-T23/Syt11/C5ar2/Ccr5	51
GO	BP	GO:0051271	negative regulation of cellular component movement	81/2453	297/17047	4.1481e-09	2.48719e-07	ENSMUSG00000000562/ENSMUSG00000000627/ENSMUSG00000000753/ENSMUSG00000001131/ENSMUSG00000001227/ENSMUSG00000001672/ENSMUSG00000002633/ENSMUSG00000002985/ENSMUSG00000004040/ENSMUSG00000006958/ENSMUSG00000009681/ENSMUSG00000015839/ENSMUSG00000016128/ENSMUSG00000016918/ENSMUSG00000017631/ENSMUSG00000019647/ENSMUSG00000020262/ENSMUSG00000020733/ENSMUSG00000020810/ENSMUSG00000021262/ENSMUSG00000021451/…	Adora3/Sema4f/Serpinf1/Timp1/Sema6b/Marveld3/Shh/Apoe/Stat3/Chrd/Bcr/Nfe2l2/Stard13/Sulf1/Abr/Sema6a/Adarb1/Slc9a3r1/Cygb/Evl/Sema4d/Drd1a/Ptprg/Dlg5/Robo1/Cyp1b1/Aif1/Ldlrad4/Fas/Il33/Arhgdia/Sema4g/Ptprj/Cd63/Ifitm1/Nrp1/Sp100/Dab2ip/Notch1/Spred1/Pfn2/Adam15/Podn/Sema3c/Tgfbr3/Ptn/Cd9/Nr2f2/Was/Plxna3/Slit2/Cx3cl1/Trib1/Card10/Ptprm/Dbn1/Bai1/Ccl12/Fam115a/Fgf2/Limch1/Rras/2610034B18Rik/Abhd2/…	81
GO	MF	GO:0005178	integrin binding	44/2478	118/17092	7.18893e-10	2.54009e-07	ENSMUSG00000000392/ENSMUSG00000000957/ENSMUSG00000001507/ENSMUSG00000001930/ENSMUSG00000009073/ENSMUSG00000015533/ENSMUSG00000015647/ENSMUSG00000015829/ENSMUSG00000017466/ENSMUSG00000019820/ENSMUSG00000019997/ENSMUSG00000020122/ENSMUSG00000020758/ENSMUSG00000020932/ENSMUSG00000021457/ENSMUSG00000021702/ENSMUSG00000021814/ENSMUSG00000021998/ENSMUSG00000022443/ENSMUSG00000024965/ENSMUSG00000025321/…	Fap/Mmp14/Itga3/Vwf/Nf2/Itga2/Lama5/Tnr/Timp2/Utrn/Ctgf/Egfr/Itgb4/Gfap/Syk/Thbs4/Anxa7/Lcp1/Myh9/Fermt3/Itgb8/Cd151/Fn1/Itgav/Src/Vcam1/Adam15/Cyr61/Ppap2b/Ptn/Cd9/Cx3cl1/Jam3/Isg15/Fgf2/Icam1/Cd81/Thbs1/Lyn/S1pr2/Igf2/Lamb2/Kdr/S1pr3	44
GO	BP	GO:0014013	regulation of gliogenesis	48/2453	142/17047	4.28693e-09	2.54472e-07	ENSMUSG00000002489/ENSMUSG00000002633/ENSMUSG00000009073/ENSMUSG00000010086/ENSMUSG00000014599/ENSMUSG00000019803/ENSMUSG00000019982/ENSMUSG00000020467/ENSMUSG00000020932/ENSMUSG00000021756/ENSMUSG00000021835/ENSMUSG00000022425/ENSMUSG00000023915/ENSMUSG00000023992/ENSMUSG00000024176/ENSMUSG00000024304/ENSMUSG00000024778/ENSMUSG00000024927/ENSMUSG00000026235/ENSMUSG00000026249/ENSMUSG00000026923/…	Tiam1/Shh/Nf2/Rnf112/Csf1/Nr2e1/Myb/Efemp1/Gfap/Il6st/Bmp4/Enpp2/Tnfrsf21/Trem2/Sox8/Cdh2/Fas/Rela/Epha4/Serpine2/Notch1/Grin1/Spint1/Tlr2/Dab1/Tnfrsf1b/Hdac1/P2rx4/Ptn/Il34/Trf/Lif/Tmem98/P2ry12/C1qa/Zfp365/Atf5/Dag1/Lrp1/Clcf1/Tspo/Lyn/2900011O08Rik/Zfp488/Tenm4/C5ar1/Lin28a/Qk	48
GO	CC	GO:0099634	postsynaptic specialization membrane	43/2474	125/17165	1.57636e-08	2.56831e-07	ENSMUSG00000000263/ENSMUSG00000000881/ENSMUSG00000001986/ENSMUSG00000002489/ENSMUSG00000003378/ENSMUSG00000007653/ENSMUSG00000010803/ENSMUSG00000017314/ENSMUSG00000020436/ENSMUSG00000020524/ENSMUSG00000020598/ENSMUSG00000020723/ENSMUSG00000022494/ENSMUSG00000022656/ENSMUSG00000024304/ENSMUSG00000025892/ENSMUSG00000026959/ENSMUSG00000028289/ENSMUSG00000030223/ENSMUSG00000030302/ENSMUSG00000031302/…	Glra1/Dlg3/Gria3/Tiam1/Grik5/Gabrb2/Gabra1/Mpp2/Gabrg2/Gria1/Nrcam/Cacng4/Shisa9/Pvrl3/Cdh2/Gria4/Grin1/Epha7/Ptpro/Atp2b2/Nlgn3/Clstn2/Chrm1/Ptprf/Gabrb3/Lrfn3/Dgki/Cacng5/Adam22/Kcnd3/D3Bwg0562e/Chrm3/Lrrc4b/Slitrk3/Lrrc4/Neto1/Lrrc4c/Dlg2/Shisa6/Lrrtm1/Nlgn1/Grid2/Lrrtm2	43
GO	BP	GO:0070663	regulation of leukocyte proliferation	64/2453	215/17047	4.47917e-09	2.6153e-07	ENSMUSG00000000732/ENSMUSG00000001123/ENSMUSG00000002633/ENSMUSG00000004266/ENSMUSG00000010142/ENSMUSG00000014599/ENSMUSG00000016206/ENSMUSG00000016493/ENSMUSG00000016496/ENSMUSG00000018899/ENSMUSG00000020101/ENSMUSG00000020399/ENSMUSG00000020612/ENSMUSG00000020919/ENSMUSG00000021457/ENSMUSG00000021756/ENSMUSG00000021782/ENSMUSG00000021835/ENSMUSG00000022488/ENSMUSG00000022508/ENSMUSG00000022885/…	Icosl/Lgals9/Shh/Ptpn6/Tnfrsf13b/Csf1/H2-M3/Cd46/Cd274/Irf1/4632428N05Rik/Havcr2/Prkar1a/Stat5b/Syk/Il6st/Dlg5/Bmp4/Nckap1l/Bcl6/St6gal1/Cd86/Tnfrsf21/Aif1/Anxa1/Gal/Ptprc/Mapk8ip1/Nfatc2/Il21/Il6ra/Vcam1/Tnfrsf1b/Cd38/Tyrobp/Sash3/Efnb1/Casp3/Tgfbr2/Nck1/Myd88/Rac2/Vav3/Ccl12/Tnfsf9/Pawr/Cd276/Lmo1/H2-Aa/Cd81/Tlr4/Clcf1/Lyn/Tnfrsf14/Cd24a/Ccdc88b/Igf2/Lgals3/Rasal3/Cebpb/Erbb2/H2-T23/Cd59b/H2-Ab1	64
GO	BP	GO:0007162	negative regulation of cell adhesion	74/2453	263/17047	4.49394e-09	2.6153e-07	ENSMUSG00000000693/ENSMUSG00000000957/ENSMUSG00000001034/ENSMUSG00000001123/ENSMUSG00000002633/ENSMUSG00000004266/ENSMUSG00000009073/ENSMUSG00000015829/ENSMUSG00000016206/ENSMUSG00000016496/ENSMUSG00000018899/ENSMUSG00000019647/ENSMUSG00000020101/ENSMUSG00000020399/ENSMUSG00000020612/ENSMUSG00000021318/ENSMUSG00000021451/ENSMUSG00000021782/ENSMUSG00000021835/ENSMUSG00000022425/ENSMUSG00000022508/…	Loxl3/Mmp14/Mapk7/Lgals9/Shh/Ptpn6/Nf2/Tnr/H2-M3/Cd274/Irf1/Sema6a/4632428N05Rik/Havcr2/Prkar1a/Gli3/Sema4d/Dlg5/Bmp4/Enpp2/Bcl6/Mfi2/Cd86/Tnfrsf21/Vegfa/Cyp1b1/Anxa1/Serpine2/Ptprc/Plxna2/Notch1/Pag1/Src/Adam15/Dab1/Epha5/Dtx1/Plxna4/Plxna1/Plxnd1/Lag3/Cd9/Pde3b/Il4ra/Arhgap6/Plxna3/Casp3/Cdh13/Ubash3b/Pawr/Cd276/H2-Aa/Plxnb2/Fgl2/Thbs1/Lrp1/Fzd7/Mbp/Tnfrsf14/Epcam/C77370/Cd24a/Dact2/Zfp608/Prkg…	74
GO	CC	GO:0030426	growth cone	61/2474	207/17165	1.6568e-08	2.63511e-07	ENSMUSG00000000881/ENSMUSG00000001507/ENSMUSG00000001761/ENSMUSG00000002489/ENSMUSG00000006930/ENSMUSG00000013033/ENSMUSG00000016256/ENSMUSG00000017466/ENSMUSG00000019820/ENSMUSG00000020173/ENSMUSG00000021068/ENSMUSG00000021848/ENSMUSG00000022037/ENSMUSG00000022687/ENSMUSG00000024109/ENSMUSG00000025810/ENSMUSG00000026235/ENSMUSG00000026764/ENSMUSG00000026833/ENSMUSG00000026959/ENSMUSG00000027009/…	Dlg3/Itga3/Smo/Tiam1/Hap1/Lphn1/Ctsz/Timp2/Utrn/Cobl/Nin/Otx2/Clu/Boc/Nrxn1/Nrp1/Epha4/Kif5c/Olfm1/Grin1/Itga4/Mapk8ip1/Lamp5/Tpm3/Elavl4/Acap3/Arpc3/Fscn1/Auts2/Exoc4/Cyfip1/Myh14/Cttn/Cdkl5/Flna/Gpm6a/Pvrl1/Fez1/Tmod2/Ptprf/Ctnnd1/Dbn1/Sncb/Shank2/Ppp1r9b/Prex1/Lrp1/Agrn/Crtac1/Nrsn1/Orai1/Flrt3/Ntrk2/Cfl1/Palld/Unc5c/Lrrtm1/Fkbp15/Gprin1/Zfp804a/Cbx6	61
GO	BP	GO:1901214	regulation of neuron death	90/2453	343/17047	4.6948e-09	2.65516e-07	ENSMUSG00000000753/ENSMUSG00000000982/ENSMUSG00000001761/ENSMUSG00000002083/ENSMUSG00000002602/ENSMUSG00000002633/ENSMUSG00000002985/ENSMUSG00000003378/ENSMUSG00000003849/ENSMUSG00000004040/ENSMUSG00000004891/ENSMUSG00000005413/ENSMUSG00000005656/ENSMUSG00000006699/ENSMUSG00000007653/ENSMUSG00000009292/ENSMUSG00000014077/ENSMUSG00000014599/ENSMUSG00000016256/ENSMUSG00000018909/ENSMUSG00000019843/…	Serpinf1/Ccl3/Smo/Bbc3/Axl/Shh/Apoe/Grik5/Nqo1/Stat3/Nes/Hmox1/Snx6/Cdc42/Gabrb2/Trpm2/Chp1/Csf1/Ctsz/Arrb1/Fyn/Myb/Chga/Clu/Hdac7/Faim2/Abcc1/Vegfa/Fas/Nrp1/Casp8/Ncf2/Parp1/Capn2/Nr4a2/Grin1/Ntrk1/Fbxw7/Gclm/Epha7/Tnfrsf1b/Hdac1/Rest/Chl1/Itpr1/Tnfrsf1a/Tyrobp/Nupr1/Casp3/Mt3/Mt1/Cx3cl1/Aars/Ptprf/Gabrb3/Cacna1a/Grn/Sncb/Ccl12/Pawr/C1qa/Nos1ap/Mcl1/Tlr4/En2/Tgfb2/Picalm/Wfs1/Lrp1/Clcf1/Kif14/Ag…	90
GO	BP	GO:0007272	ensheathment of neurons	47/2453	138/17047	4.70511e-09	2.65516e-07	ENSMUSG00000001288/ENSMUSG00000004056/ENSMUSG00000004207/ENSMUSG00000015342/ENSMUSG00000017167/ENSMUSG00000017491/ENSMUSG00000017929/ENSMUSG00000019843/ENSMUSG00000020758/ENSMUSG00000021665/ENSMUSG00000022037/ENSMUSG00000023915/ENSMUSG00000024044/ENSMUSG00000024304/ENSMUSG00000024527/ENSMUSG00000027010/ENSMUSG00000027375/ENSMUSG00000027995/ENSMUSG00000028599/ENSMUSG00000029838/ENSMUSG00000030342/…	Rarg/Akt2/Psap/Xk/Cntnap1/Rarb/B4galt5/Fyn/Itgb4/Hexb/Clu/Tnfrsf21/Epb4.1l3/Cdh2/Afg3l2/Slc25a12/Mal/Tlr2/Tnfrsf1b/Ptn/Cd9/Ctsc/Itgax/Jam3/Trf/Gpc1/Tmem98/Myrf/Lgi4/Egr2/Gpr126/Dag1/Adam22/Kif14/Mbp/Marveld1/Zfp488/Kcnj10/Sh3tc2/Tenm4/Amigo1/Ntrk2/B4galt6/Qk/Erbb2/Cst7/Arhgef10	47
GO	BP	GO:0008366	axon ensheathment	47/2453	138/17047	4.70511e-09	2.65516e-07	ENSMUSG00000001288/ENSMUSG00000004056/ENSMUSG00000004207/ENSMUSG00000015342/ENSMUSG00000017167/ENSMUSG00000017491/ENSMUSG00000017929/ENSMUSG00000019843/ENSMUSG00000020758/ENSMUSG00000021665/ENSMUSG00000022037/ENSMUSG00000023915/ENSMUSG00000024044/ENSMUSG00000024304/ENSMUSG00000024527/ENSMUSG00000027010/ENSMUSG00000027375/ENSMUSG00000027995/ENSMUSG00000028599/ENSMUSG00000029838/ENSMUSG00000030342/…	Rarg/Akt2/Psap/Xk/Cntnap1/Rarb/B4galt5/Fyn/Itgb4/Hexb/Clu/Tnfrsf21/Epb4.1l3/Cdh2/Afg3l2/Slc25a12/Mal/Tlr2/Tnfrsf1b/Ptn/Cd9/Ctsc/Itgax/Jam3/Trf/Gpc1/Tmem98/Myrf/Lgi4/Egr2/Gpr126/Dag1/Adam22/Kif14/Mbp/Marveld1/Zfp488/Kcnj10/Sh3tc2/Tenm4/Amigo1/Ntrk2/B4galt6/Qk/Erbb2/Cst7/Arhgef10	47
GO	BP	GO:0009615	response to virus	77/2453	278/17047	4.74135e-09	2.65516e-07	ENSMUSG00000000275/ENSMUSG00000001123/ENSMUSG00000001166/ENSMUSG00000009585/ENSMUSG00000017830/ENSMUSG00000018899/ENSMUSG00000020227/ENSMUSG00000020641/ENSMUSG00000020941/ENSMUSG00000022037/ENSMUSG00000022901/ENSMUSG00000022906/ENSMUSG00000022965/ENSMUSG00000022971/ENSMUSG00000023341/ENSMUSG00000024079/ENSMUSG00000024349/ENSMUSG00000024810/ENSMUSG00000025491/ENSMUSG00000025492/ENSMUSG00000025498/…	Trim25/Lgals9/Oas1c/Apobec3/Dhx58/Irf1/Irak3/Rsad2/Map3k14/Clu/Cd86/Parp9/Ifngr2/Ifnar2/Mx2/Eif2ak2/Tmem173/Il33/Ifitm1/Ifitm3/Irf7/Stat1/Ptprc/Lcn2/Ifih1/Zbp1/Src/Adar/Stmn1/Oasl2/Oas1b/Irf5/Dfna5/Zc3hav1/Itgax/Cd37/Trim30a/Tlr3/Plscr1/Myd88/Oas2/Rtp4/Tlr13/Ifit1/Cxcl10/Slfn8/Isg15/Ddx60/Polr3k/A230050P20Rik/Fgl2/Stat2/Ddx58/Apobec1/Mill2/Oasl1/Tlr7/Ifit2/Bst2/Dtx3l/Oas1a/Bcl3/Cfl1/Trim12c/Trim3…	77
GO	BP	GO:0050768	negative regulation of neurogenesis	83/2453	308/17047	4.92351e-09	2.7314e-07	ENSMUSG00000000247/ENSMUSG00000000567/ENSMUSG00000000627/ENSMUSG00000000861/ENSMUSG00000001227/ENSMUSG00000002633/ENSMUSG00000002985/ENSMUSG00000004040/ENSMUSG00000007655/ENSMUSG00000014773/ENSMUSG00000015829/ENSMUSG00000016256/ENSMUSG00000019647/ENSMUSG00000019803/ENSMUSG00000020393/ENSMUSG00000020467/ENSMUSG00000020932/ENSMUSG00000021318/ENSMUSG00000021451/ENSMUSG00000021701/ENSMUSG00000021745/…	Lhx2/Sox9/Sema4f/Bcl11a/Sema6b/Shh/Apoe/Stat3/Cav1/Dll1/Tnr/Ctsz/Sema6a/Nr2e1/Kremen1/Efemp1/Gfap/Gli3/Sema4d/Plk2/Ptprg/Bmp4/Il15ra/Sox8/Syt4/Fas/Sema4g/Gdf11/Fuom/Nrp1/Map4k4/Ctdsp1/Itm2c/Epha4/Rab29/Notch1/Pax6/Efna1/Arhgef2/Epha7/Dab1/Ephb2/Sema3c/Cd38/Rest/Dtx1/Ptn/Nlgn3/Flna/Plxna3/Slit2/Mt3/Inppl1/Tmem98/Prtg/Zfp365/Atf5/Six3/Lrp1/Rap1gap/Tspo/Inpp5f/Isl1/Trim46/2900011O08Rik/Rtn4rl1/C7737…	83
GO	BP	GO:0051965	positive regulation of synapse assembly	31/2453	73/17047	5.2155e-09	2.86659e-07	ENSMUSG00000005958/ENSMUSG00000013033/ENSMUSG00000020704/ENSMUSG00000021451/ENSMUSG00000021782/ENSMUSG00000024109/ENSMUSG00000024647/ENSMUSG00000028072/ENSMUSG00000028184/ENSMUSG00000028399/ENSMUSG00000028664/ENSMUSG00000031302/ENSMUSG00000032452/ENSMUSG00000034730/ENSMUSG00000035064/ENSMUSG00000036295/ENSMUSG00000037605/ENSMUSG00000041936/ENSMUSG00000042589/ENSMUSG00000045776/ENSMUSG00000047085/…	Ephb3/Lphn1/Asic2/Sema4d/Dlg5/Nrxn1/Cbln2/Ntrk1/Lphn2/Ptprd/Ephb2/Nlgn3/Clstn2/Bai1/Eef2k/Lrrn3/Lphn3/Agrn/Cux2/Lrtm1/Lrrc4b/Flrt2/Amigo2/Slitrk3/Amigo1/Flrt3/Ntrk2/Lrrtm1/Nlgn1/Grid2/Lrrtm2	31
GO	BP	GO:1905114	cell surface receptor signaling pathway involved in cell-cell signaling	118/2453	490/17047	5.27415e-09	2.87223e-07	ENSMUSG00000000126/ENSMUSG00000000263/ENSMUSG00000000567/ENSMUSG00000000632/ENSMUSG00000001507/ENSMUSG00000001761/ENSMUSG00000001847/ENSMUSG00000002602/ENSMUSG00000002633/ENSMUSG00000002985/ENSMUSG00000003352/ENSMUSG00000003378/ENSMUSG00000006800/ENSMUSG00000007655/ENSMUSG00000007989/ENSMUSG00000008305/ENSMUSG00000013076/ENSMUSG00000014361/ENSMUSG00000016918/ENSMUSG00000017314/ENSMUSG00000020122/…	Wnt9a/Glra1/Sox9/Sez6/Itga3/Smo/Rac1/Axl/Shh/Apoe/Cacnb3/Grik5/Sulf2/Cav1/Fzd3/Tle1/Amotl1/Mertk/Sulf1/Mpp2/Egfr/Apc2/Lgr5/Fbxw11/Kremen1/Slc9a3r1/Nxn/Ccdc88c/Ryr2/Gli3/Ror2/Bmp4/Lats2/Mapk8ip2/Shank3/Arl6/Igsf11/Cela1/Npff/Nrxn1/C3/Celf4/Cdh2/Tle4/Lrp5/Limd1/Vangl2/Mark1/Zeb2/Dab2ip/Notch1/Grin1/Frzb/Src/Wwtr1/Tlr2/Nfkb1/Ppap2b/Hdac1/Cdk14/P2rx7/P2rx4/Grip2/Ptpro/Caprin2/Dkk3/Nlgn3/Gpr124/Cx3cl1…	118
GO	BP	GO:0072511	divalent inorganic cation transport	114/2453	469/17047	5.48741e-09	2.94925e-07	ENSMUSG00000000409/ENSMUSG00000000617/ENSMUSG00000000982/ENSMUSG00000002083/ENSMUSG00000003161/ENSMUSG00000003352/ENSMUSG00000004113/ENSMUSG00000004266/ENSMUSG00000006519/ENSMUSG00000006930/ENSMUSG00000007655/ENSMUSG00000009292/ENSMUSG00000010066/ENSMUSG00000013275/ENSMUSG00000015968/ENSMUSG00000016933/ENSMUSG00000017400/ENSMUSG00000017412/ENSMUSG00000018340/ENSMUSG00000019843/ENSMUSG00000019943/…	Lck/Grm6/Ccl3/Bbc3/Sri/Cacnb3/Cacna1b/Ptpn6/Cyba/Hap1/Cav1/Trpm2/Cacna2d2/Slc41a1/Cacna1d/Plcg1/Stac2/Cacnb4/Anxa6/Fyn/Atp2b1/Myb/Ctgf/Pik3cg/Tspan13/Cacng4/Cacna1g/Akap5/Ryr2/Drd1a/Ap3b1/Camk2g/Bmp4/Micu2/Jph4/Asic1/Ehd3/Cacna1h/Afg3l2/Plce1/Jph3/Homer2/Dbi/Ptprc/Atp2b4/Grin1/Itgav/Anxa5/Asph/Gem/Clca3/Pde4b/Hpca/Slc9a1/Tmem165/P2rx7/P2rx4/Itpr1/Atp2b2/Trpm1/Rasa3/Gpm6a/Gnao1/Mt3/Cx3cl1/Agt/Ubas…	114
GO	BP	GO:0071346	cellular response to interferon-gamma	41/2453	113/17047	5.51493e-09	2.94925e-07	ENSMUSG00000000982/ENSMUSG00000004626/ENSMUSG00000006699/ENSMUSG00000017774/ENSMUSG00000018899/ENSMUSG00000018927/ENSMUSG00000019122/ENSMUSG00000021262/ENSMUSG00000022906/ENSMUSG00000023460/ENSMUSG00000024397/ENSMUSG00000024411/ENSMUSG00000025278/ENSMUSG00000025888/ENSMUSG00000026104/ENSMUSG00000026696/ENSMUSG00000026712/ENSMUSG00000026946/ENSMUSG00000027995/ENSMUSG00000028268/ENSMUSG00000028270/…	Ccl3/Stxbp2/Cdc42/Myo1c/Irf1/Ccl6/Ccl9/Evl/Parp9/Rab12/Aif1/Aqp4/Flnb/Casp1/Stat1/Vamp4/Mrc1/Nmi/Tlr2/Gbp3/Gbp2/Gbp9/Zyx/Was/Tlr3/Cx3cl1/Parp14/Ccl12/Tlr4/Gbp7/Irf8/Cdc42ep4/Irgm1/5430435G22Rik/Cd47/H2-Q7/Irgm2/H2-Ab1/Nlrc5/Gbp6/Gbp4	41
GO	BP	GO:0014015	positive regulation of gliogenesis	34/2453	85/17047	6.21451e-09	3.29369e-07	ENSMUSG00000002489/ENSMUSG00000002633/ENSMUSG00000010086/ENSMUSG00000014599/ENSMUSG00000019982/ENSMUSG00000020932/ENSMUSG00000021756/ENSMUSG00000022425/ENSMUSG00000023992/ENSMUSG00000024176/ENSMUSG00000024927/ENSMUSG00000026249/ENSMUSG00000026923/ENSMUSG00000026959/ENSMUSG00000027315/ENSMUSG00000027995/ENSMUSG00000028599/ENSMUSG00000028800/ENSMUSG00000029470/ENSMUSG00000029838/ENSMUSG00000031750/…	Tiam1/Shh/Rnf112/Csf1/Myb/Gfap/Il6st/Enpp2/Trem2/Sox8/Rela/Serpine2/Notch1/Grin1/Spint1/Tlr2/Tnfrsf1b/Hdac1/P2rx4/Ptn/Il34/Trf/Lif/P2ry12/C1qa/Zfp365/Dag1/Lrp1/Clcf1/Tspo/Lyn/Zfp488/Tenm4/Qk	34
GO	BP	GO:0051607	defense response to virus	63/2453	212/17047	6.34692e-09	3.3341e-07	ENSMUSG00000000275/ENSMUSG00000001166/ENSMUSG00000009585/ENSMUSG00000017830/ENSMUSG00000018899/ENSMUSG00000020641/ENSMUSG00000020941/ENSMUSG00000022901/ENSMUSG00000022906/ENSMUSG00000022965/ENSMUSG00000022971/ENSMUSG00000023341/ENSMUSG00000024079/ENSMUSG00000024349/ENSMUSG00000024810/ENSMUSG00000025491/ENSMUSG00000025492/ENSMUSG00000025498/ENSMUSG00000026104/ENSMUSG00000026395/ENSMUSG00000026896/…	Trim25/Oas1c/Apobec3/Dhx58/Irf1/Rsad2/Map3k14/Cd86/Parp9/Ifngr2/Ifnar2/Mx2/Eif2ak2/Tmem173/Il33/Ifitm1/Ifitm3/Irf7/Stat1/Ptprc/Ifih1/Zbp1/Adar/Oasl2/Oas1b/Irf5/Zc3hav1/Itgax/Cd37/Trim30a/Tlr3/Plscr1/Oas2/Rtp4/Ifit1/Cxcl10/Slfn8/Isg15/Ddx60/Polr3k/A230050P20Rik/Fgl2/Stat2/Ddx58/Apobec1/Mill2/Oasl1/Tlr7/Bst2/Dtx3l/Oas1a/Trim12c/Trim30d/Trim5/Ifnlr1/I830012O16Rik/Trim12a/Lsm14a/Tspan6/Slfn9/Nlrc5/If…	63
GO	BP	GO:0050806	positive regulation of synaptic transmission	60/2453	198/17047	6.44799e-09	3.35748e-07	ENSMUSG00000002985/ENSMUSG00000003352/ENSMUSG00000004113/ENSMUSG00000005360/ENSMUSG00000006930/ENSMUSG00000015829/ENSMUSG00000015837/ENSMUSG00000015968/ENSMUSG00000017314/ENSMUSG00000017412/ENSMUSG00000019803/ENSMUSG00000020122/ENSMUSG00000020524/ENSMUSG00000020723/ENSMUSG00000020932/ENSMUSG00000021464/ENSMUSG00000021478/ENSMUSG00000021701/ENSMUSG00000022623/ENSMUSG00000022790/ENSMUSG00000024109/…	Apoe/Cacnb3/Cacna1b/Slc1a3/Hap1/Tnr/Sqstm1/Cacna1d/Mpp2/Cacnb4/Nr2e1/Egfr/Gria1/Cacng4/Gfap/Ror2/Drd1a/Plk2/Shank3/Igsf11/Nrxn1/Syt7/Gria4/Epha4/Serpine2/Dbi/Grin1/Ntrk1/Ephb2/Ptn/Grip2/Erc1/Tyrobp/Cckbr/Nlgn3/Clstn2/Igsf9b/Dbn1/Kiss1r/Syt1/Shank2/Slc24a2/Shank1/Cacng5/Adora1/Reln/Cux2/Prkce/Syt12/Neto1/Cx3cr1/Ntrk2/Grik2/Abat/Camk2b/Flot1/Lrrtm1/Syt9/Nlgn1/Lrrtm2	60
GO	BP	GO:0050670	regulation of lymphocyte proliferation	61/2453	203/17047	6.89987e-09	3.53083e-07	ENSMUSG00000000732/ENSMUSG00000001123/ENSMUSG00000002633/ENSMUSG00000004266/ENSMUSG00000010142/ENSMUSG00000016206/ENSMUSG00000016493/ENSMUSG00000016496/ENSMUSG00000018899/ENSMUSG00000020101/ENSMUSG00000020399/ENSMUSG00000020612/ENSMUSG00000020919/ENSMUSG00000021457/ENSMUSG00000021756/ENSMUSG00000021782/ENSMUSG00000021835/ENSMUSG00000022488/ENSMUSG00000022508/ENSMUSG00000022901/ENSMUSG00000023915/…	Icosl/Lgals9/Shh/Ptpn6/Tnfrsf13b/H2-M3/Cd46/Cd274/Irf1/4632428N05Rik/Havcr2/Prkar1a/Stat5b/Syk/Il6st/Dlg5/Bmp4/Nckap1l/Bcl6/Cd86/Tnfrsf21/Aif1/Anxa1/Gal/Ptprc/Mapk8ip1/Nfatc2/Il21/Il6ra/Vcam1/Tnfrsf1b/Cd38/Tyrobp/Sash3/Efnb1/Casp3/Tgfbr2/Nck1/Myd88/Rac2/Vav3/Tnfsf9/Pawr/Cd276/Lmo1/H2-Aa/Cd81/Tlr4/Clcf1/Lyn/Tnfrsf14/Cd24a/Ccdc88b/Igf2/Lgals3/Rasal3/Cebpb/Erbb2/H2-T23/Cd59b/H2-Ab1	61
GO	BP	GO:0050920	regulation of chemotaxis	61/2453	203/17047	6.89987e-09	3.53083e-07	ENSMUSG00000000627/ENSMUSG00000000982/ENSMUSG00000001227/ENSMUSG00000001847/ENSMUSG00000002489/ENSMUSG00000002633/ENSMUSG00000004056/ENSMUSG00000004791/ENSMUSG00000009376/ENSMUSG00000014599/ENSMUSG00000015533/ENSMUSG00000019647/ENSMUSG00000021451/ENSMUSG00000021508/ENSMUSG00000021702/ENSMUSG00000022488/ENSMUSG00000022883/ENSMUSG00000022885/ENSMUSG00000023886/ENSMUSG00000023951/ENSMUSG00000023992/…	Sema4f/Ccl3/Sema6b/Rac1/Tiam1/Shh/Akt2/Pgf/Met/Csf1/Itga2/Sema6a/Sema4d/Cxcl14/Thbs4/Nckap1l/Robo1/St6gal1/Smoc2/Vegfa/Trem2/Aif1/Sema4g/Nrp1/Fn1/Notch1/Edn2/Sema3c/P2rx4/Plxna4/Ptn/Plxna3/Gpr124/Slit2/Fgfr1/Cx3cl1/Cdh13/Jam3/Smad3/Slc8b1/Rac2/Cxcl10/Ccl12/P2ry12/Fgf2/Thbs1/C3ar1/Nbl1/Agrn/Cmklr1/Lyn/Tubb2b/C5ar1/Robo2/Mospd2/Kdr/Mapk3/Sema3e/Ano6/Hmgb1/C5ar2	61
GO	BP	GO:0002703	regulation of leukocyte mediated immunity	62/2453	208/17047	7.33987e-09	3.72389e-07	ENSMUSG00000001123/ENSMUSG00000002147/ENSMUSG00000004266/ENSMUSG00000004626/ENSMUSG00000005413/ENSMUSG00000009681/ENSMUSG00000015947/ENSMUSG00000016206/ENSMUSG00000017631/ENSMUSG00000019998/ENSMUSG00000020101/ENSMUSG00000020399/ENSMUSG00000020641/ENSMUSG00000020828/ENSMUSG00000020919/ENSMUSG00000021457/ENSMUSG00000022378/ENSMUSG00000022508/ENSMUSG00000023249/ENSMUSG00000024164/ENSMUSG00000024339/…	Lgals9/Stat6/Ptpn6/Stxbp2/Hmox1/Bcr/Fcgr1/H2-M3/Abr/Stx7/4632428N05Rik/Havcr2/Rsad2/Pld2/Stat5b/Syk/Fam49b/Bcl6/Parp3/C3/Tap2/Il1r1/Ptprc/Rasgrp1/Il21/Tnfrsf1b/Fgr/P2rx7/Lag3/Clec2d/Il4ra/Sash3/Was/Tlr3/Rac2/Vav1/H2-Q4/Tap1/Arid5a/Cd81/Cd84/Susd4/Tlr4/Ddx58/Pvr/Clcf1/Mill2/Lyn/Bst2/Cd24a/Igf2/H2-T22/Fcer1g/H2-Q7/B2m/H2-K1/Pvrl2/Hmgb1/H2-T23/H2-Q6/H2-D1/H60b	62
GO	BP	GO:0016358	dendrite development	73/2453	261/17047	7.5388e-09	3.7924e-07	ENSMUSG00000000632/ENSMUSG00000000861/ENSMUSG00000001847/ENSMUSG00000002489/ENSMUSG00000002985/ENSMUSG00000005958/ENSMUSG00000006435/ENSMUSG00000006699/ENSMUSG00000019803/ENSMUSG00000019843/ENSMUSG00000019970/ENSMUSG00000020132/ENSMUSG00000020173/ENSMUSG00000021057/ENSMUSG00000021451/ENSMUSG00000021701/ENSMUSG00000021782/ENSMUSG00000021877/ENSMUSG00000022311/ENSMUSG00000022619/ENSMUSG00000022623/…	Sez6/Bcl11a/Rac1/Tiam1/Apoe/Ephb3/Neurl1a/Cdc42/Nr2e1/Fyn/Sgk1/Rab21/Cobl/Akap5/Sema4d/Plk2/Dlg5/Arf4/Csmd3/Mapk8ip2/Shank3/Ache/Fas/Farp1/Nrp1/Epha4/Mark1/Dab2ip/Grin1/Map1a/Efna1/Ptprd/Dab1/Elavl4/Lrp8/Ephb2/Epha5/Ptn/Camk1/Caprin2/Cyfip1/Cdkl5/Nlgn3/Nedd4/Ptprf/Arhgap44/Rbfox2/Cacna1a/Dbn1/Eef2k/Lzts1/Shank2/Zfp365/Srcin1/Cul7/Shank1/Ppp1r9b/Picalm/Prex1/Sdk1/Reln/Cux2/Sipa1l1/Prex2/Prkg1/Ntrk…	73
GO	CC	GO:0001726	ruffle	52/2474	167/17165	2.51359e-08	3.90484e-07	ENSMUSG00000000392/ENSMUSG00000000915/ENSMUSG00000001025/ENSMUSG00000001847/ENSMUSG00000002489/ENSMUSG00000004056/ENSMUSG00000005057/ENSMUSG00000006445/ENSMUSG00000009073/ENSMUSG00000015745/ENSMUSG00000016933/ENSMUSG00000017774/ENSMUSG00000018001/ENSMUSG00000018334/ENSMUSG00000020120/ENSMUSG00000020173/ENSMUSG00000020733/ENSMUSG00000021877/ENSMUSG00000021998/ENSMUSG00000022272/ENSMUSG00000022443/…	Fap/Hip1r/S100a6/Rac1/Tiam1/Akt2/Sh2b2/Epha2/Nf2/Plekho1/Plcg1/Myo1c/Cyth3/Ksr1/Plek/Cobl/Slc9a3r1/Arf4/Lcp1/Myo10/Myh9/Twf1/Samsn1/Tnfrsf12a/Fgd2/Aif1/Notch1/Nckap1/Itgav/Src/Arhgef2/Pdpn/Fgr/Fscn1/Cyfip1/Psd3/Arfip2/Cttn/Cdkl5/Klhl2/Mtss1l/Pip5k1c/Hmha1/Asap3/Eef1a1/Ppp1r9b/Plekha1/Ddx58/Amot/Cfl1/Palld/Wipf1	52
GO	BP	GO:0032956	regulation of actin cytoskeleton organization	86/2453	326/17047	7.83431e-09	3.90794e-07	ENSMUSG00000000915/ENSMUSG00000001847/ENSMUSG00000002233/ENSMUSG00000003283/ENSMUSG00000006699/ENSMUSG00000009073/ENSMUSG00000009292/ENSMUSG00000009376/ENSMUSG00000017144/ENSMUSG00000017774/ENSMUSG00000019997/ENSMUSG00000020120/ENSMUSG00000020388/ENSMUSG00000020580/ENSMUSG00000021262/ENSMUSG00000021589/ENSMUSG00000021886/ENSMUSG00000022451/ENSMUSG00000022488/ENSMUSG00000022623/ENSMUSG00000024143/…	Hip1r/Rac1/Rhoc/Hck/Cdc42/Nf2/Trpm2/Met/Rnd3/Myo1c/Ctgf/Plek/Pdlim4/Rock2/Evl/Rhobtb3/Gpr65/Twf1/Nckap1l/Shank3/Rhoq/Csf1r/Arhgdia/Nrp1/Vangl2/Neb/Nckap1/Pfn2/Tmod1/Stmn1/Fgr/Rhoh/Epha5/Arpc3/Fscn1/Arpc1b/Add2/Vasp/Cyfip1/Cttn/Was/Flna/Gpm6b/Arhgap6/Slit2/Cx3cl1/Jam3/Tmod2/Kank2/Smad3/Nck1/Arap1/Arhgap44/Dbn1/Kiss1r/C530008M17Rik/Asap3/Icam1/Plekhg2/Limch1/F11r/Fchsd1/Shank1/Baiap2l1/2610034B18Ri…	86
GO	BP	GO:0043270	positive regulation of ion transport	82/2453	306/17047	8.04571e-09	3.95455e-07	ENSMUSG00000000617/ENSMUSG00000000982/ENSMUSG00000002985/ENSMUSG00000003161/ENSMUSG00000003352/ENSMUSG00000004056/ENSMUSG00000006930/ENSMUSG00000007655/ENSMUSG00000014077/ENSMUSG00000015401/ENSMUSG00000015968/ENSMUSG00000016933/ENSMUSG00000017400/ENSMUSG00000017412/ENSMUSG00000019943/ENSMUSG00000019970/ENSMUSG00000020704/ENSMUSG00000020723/ENSMUSG00000020733/ENSMUSG00000021057/ENSMUSG00000021313/…	Grm6/Ccl3/Apoe/Sri/Cacnb3/Akt2/Hap1/Cav1/Chp1/Tmem27/Cacna1d/Plcg1/Stac2/Cacnb4/Atp2b1/Sgk1/Asic2/Cacng4/Slc9a3r1/Akap5/Ryr2/Drd1a/Bmp4/Shank3/Ifngr2/Fhl1/Trem2/Ehd3/Syt4/Gal/Dbi/Grin1/Lrrc26/Asph/Ephb2/Fabp3/Slc9a1/P2rx7/P2rx4/Itpr1/Atp2b2/Slc6a1/Arl6ip1/Nlgn3/Flna/Cx3cl1/Agt/Htr3a/Chrm1/Plcg2/Pkd2/Cxcl10/Ccl12/Kcnc2/P2ry12/Fxyd1/Fam115a/Ctss/Wfs1/Tspo/Adora1/Reln/S100a1/Kcna1/P2ry6/Orai1/Mchr1/…	82
GO	BP	GO:0050867	positive regulation of cell activation	80/2453	296/17047	8.061e-09	3.95455e-07	ENSMUSG00000000409/ENSMUSG00000000732/ENSMUSG00000000957/ENSMUSG00000001123/ENSMUSG00000002147/ENSMUSG00000002602/ENSMUSG00000002633/ENSMUSG00000003644/ENSMUSG00000004626/ENSMUSG00000007655/ENSMUSG00000007817/ENSMUSG00000016206/ENSMUSG00000016493/ENSMUSG00000016496/ENSMUSG00000018899/ENSMUSG00000019982/ENSMUSG00000019997/ENSMUSG00000020101/ENSMUSG00000020120/ENSMUSG00000020399/ENSMUSG00000020828/…	Lck/Icosl/Mmp14/Lgals9/Stat6/Axl/Shh/Rps6ka1/Stxbp2/Cav1/Zmiz1/H2-M3/Cd46/Cd274/Irf1/Myb/Ctgf/4632428N05Rik/Plek/Havcr2/Pld2/Stat5b/Gli3/Syk/Ap3b1/Il6st/Fam49b/Nckap1l/Bcl6/Cd86/Il15ra/Trem2/Aif1/Anxa1/Il33/Ptprc/Rasgrp1/Nfatc2/Il21/Il6ra/Vcam1/Pdpn/Fgr/Cd38/Ctsc/Tyrobp/Il4ra/Sash3/Efnb1/Tgfbr2/Nck1/Myd88/Vav3/Cebpa/Nfkbiz/Tnfsf9/Cd276/H2-Aa/C1qa/Cd81/Tlr4/Thbs1/Clcf1/Tox/Tnfrsf14/Cd24a/Ccdc88b/I…	80
GO	CC	GO:0099146	intrinsic component of postsynaptic density membrane	29/2474	70/17165	3.27985e-08	4.97941e-07	ENSMUSG00000001986/ENSMUSG00000003378/ENSMUSG00000017314/ENSMUSG00000020524/ENSMUSG00000020598/ENSMUSG00000020723/ENSMUSG00000022494/ENSMUSG00000022656/ENSMUSG00000025892/ENSMUSG00000026959/ENSMUSG00000028289/ENSMUSG00000030223/ENSMUSG00000030302/ENSMUSG00000032452/ENSMUSG00000032773/ENSMUSG00000033295/ENSMUSG00000036957/ENSMUSG00000040537/ENSMUSG00000044667/ENSMUSG00000046159/ENSMUSG00000047085/…	Gria3/Grik5/Mpp2/Gria1/Nrcam/Cacng4/Shisa9/Pvrl3/Gria4/Grin1/Epha7/Ptpro/Atp2b2/Clstn2/Chrm1/Ptprf/Lrfn3/Adam22/D3Bwg0562e/Chrm3/Lrrc4b/Slitrk3/Lrrc4/Neto1/Lrrc4c/Dlg2/Shisa6/Grid2/Lrrtm2	29
GO	BP	GO:0034765	regulation of ion transmembrane transport	111/2453	458/17047	1.03635e-08	5.00235e-07	ENSMUSG00000001750/ENSMUSG00000003161/ENSMUSG00000003352/ENSMUSG00000004056/ENSMUSG00000004113/ENSMUSG00000004266/ENSMUSG00000006519/ENSMUSG00000006930/ENSMUSG00000007041/ENSMUSG00000007655/ENSMUSG00000009687/ENSMUSG00000010066/ENSMUSG00000014077/ENSMUSG00000015340/ENSMUSG00000015968/ENSMUSG00000016933/ENSMUSG00000017400/ENSMUSG00000017412/ENSMUSG00000019843/ENSMUSG00000020573/ENSMUSG00000020577/…	Tcirg1/Sri/Cacnb3/Akt2/Cacna1b/Ptpn6/Cyba/Hap1/Clic1/Cav1/Fxyd5/Cacna2d2/Chp1/Cybb/Cacna1d/Plcg1/Stac2/Cacnb4/Fyn/Pik3cg/Tspan13/Asic2/Cacng4/Slc9a3r1/Cacna1g/Ryr2/Drd1a/Bmp4/Shisa9/Mapk8ip2/Shank3/Clic6/Ifngr2/Scn8a/Fhl1/Trem2/Ehd3/Nrxn1/Gal/Jph3/Cd63/Dbi/Atp2b4/Stom/Lrrc26/Kcnab1/Asph/Gem/Pde4b/Kcnq4/Ephb2/Hpca/Slc9a1/P2rx7/Fam115c/Arl6ip1/Nlgn3/Flna/Cx3cl1/Agt/Ubash3b/Nedd4/Htr3a/Plcg2/Kcnh5/P…	111
GO	BP	GO:0055074	calcium ion homeostasis	114/2453	474/17047	1.03654e-08	5.00235e-07	ENSMUSG00000000409/ENSMUSG00000000682/ENSMUSG00000000982/ENSMUSG00000001750/ENSMUSG00000002083/ENSMUSG00000002985/ENSMUSG00000003161/ENSMUSG00000003352/ENSMUSG00000004113/ENSMUSG00000004266/ENSMUSG00000006519/ENSMUSG00000006930/ENSMUSG00000007655/ENSMUSG00000009292/ENSMUSG00000010660/ENSMUSG00000015342/ENSMUSG00000015968/ENSMUSG00000016933/ENSMUSG00000017412/ENSMUSG00000018340/ENSMUSG00000019843/…	Lck/Cd52/Ccl3/Tcirg1/Bbc3/Apoe/Sri/Cacnb3/Cacna1b/Ptpn6/Cyba/Hap1/Cav1/Trpm2/Plcd1/Xk/Cacna1d/Plcg1/Cacnb4/Anxa6/Fyn/Atp2b1/Gria1/Pik3cg/Cacna1g/Akap5/Chga/Ryr2/Drd1a/Hexb/Il6st/Anxa7/Bmp4/Micu2/Jph4/Atp13a3/Npff/Afg3l2/Plce1/Jph3/Dbi/Ptprc/Atp2b4/Grin1/Itgav/Anxa5/Ptgfr/Asph/Edn2/Cd38/Tmem165/P2rx7/P2rx4/Itpr1/Erc1/Atp2b2/Trpm1/Calca/Cckbr/Rasa3/Herpud1/Cx3cl1/Agt/Ubash3b/Smad3/Pth1r/Pygm/Slc8b1…	114
GO	CC	GO:0098802	plasma membrane receptor complex	51/2474	164/17165	3.57747e-08	5.31056e-07	ENSMUSG00000000290/ENSMUSG00000000881/ENSMUSG00000001507/ENSMUSG00000001985/ENSMUSG00000001986/ENSMUSG00000003378/ENSMUSG00000004266/ENSMUSG00000007783/ENSMUSG00000015533/ENSMUSG00000020524/ENSMUSG00000020723/ENSMUSG00000020758/ENSMUSG00000021457/ENSMUSG00000021756/ENSMUSG00000022146/ENSMUSG00000022494/ENSMUSG00000022623/ENSMUSG00000025321/ENSMUSG00000025892/ENSMUSG00000026786/ENSMUSG00000026833/…	Itgb2/Dlg3/Itga3/Grik3/Gria3/Grik5/Ptpn6/Cpt1c/Itga2/Gria1/Cacng4/Itgb4/Syk/Il6st/Osmr/Shisa9/Shank3/Itgb8/Gria4/Apbb1ip/Olfm1/Acvr1/Grin1/Itga4/Itgav/Il6ra/Tlr2/Sdcbp/Itgam/Itgax/Olfm2/Htr3a/Trf/Itga2b/Chrnb4/Shank2/Shank1/Itga9/Gabbr2/Cacng5/Lyn/Dlgap3/Rnf31/Dlg2/Shisa6/Grik2/B2m/Acvr2b/Ifnlr1/Nlgn1/Grid2	51
GO	BP	GO:0031345	negative regulation of cell projection organization	59/2453	196/17047	1.12905e-08	5.40489e-07	ENSMUSG00000000627/ENSMUSG00000000861/ENSMUSG00000001227/ENSMUSG00000001507/ENSMUSG00000002985/ENSMUSG00000015829/ENSMUSG00000016256/ENSMUSG00000019647/ENSMUSG00000019843/ENSMUSG00000020393/ENSMUSG00000020467/ENSMUSG00000020932/ENSMUSG00000021262/ENSMUSG00000021451/ENSMUSG00000021701/ENSMUSG00000021745/ENSMUSG00000023206/ENSMUSG00000024109/ENSMUSG00000025207/ENSMUSG00000025810/ENSMUSG00000026074/…	Sema4f/Bcl11a/Sema6b/Itga3/Apoe/Tnr/Ctsz/Sema6a/Fyn/Kremen1/Efemp1/Gfap/Evl/Sema4d/Plk2/Ptprg/Il15ra/Nrxn1/Sema4g/Nrp1/Map4k4/Itm2c/Epha4/Rab29/Pfn2/Efna1/Epha7/Dab1/Ephb2/Sema3c/Cd38/Nlgn3/Flna/Plxna3/Slit2/Mt3/Inppl1/Ptprf/Arhgap44/Zfp365/2610034B18Rik/Lrp1/Rap1gap/Inpp5f/Trim46/Rtn4rl1/D8Ertd82e/Rtn4rl2/Cfl1/Rit2/B2m/H2-K1/Sema3e/Nlgn1/Lgals1/Nr2f1/Rgma/H2-D1/Ccr5	59
GO	BP	GO:0035456	response to interferon-beta	25/2453	53/17047	1.18362e-08	5.62078e-07	ENSMUSG00000018899/ENSMUSG00000022971/ENSMUSG00000024349/ENSMUSG00000025491/ENSMUSG00000025492/ENSMUSG00000026104/ENSMUSG00000026509/ENSMUSG00000028268/ENSMUSG00000028270/ENSMUSG00000031639/ENSMUSG00000032369/ENSMUSG00000034459/ENSMUSG00000037849/ENSMUSG00000040483/ENSMUSG00000043263/ENSMUSG00000046718/ENSMUSG00000046879/ENSMUSG00000054072/ENSMUSG00000069874/ENSMUSG00000073489/ENSMUSG00000073490/…	Irf1/Ifnar2/Tmem173/Ifitm1/Ifitm3/Stat1/Capn2/Gbp3/Gbp2/Tlr3/Plscr1/Ifit1/Gm4955/Xaf1/Pyhin1/Bst2/Irgm1/Iigp1/Irgm2/Ifi204/AI607873/Gm4951/Ifit3/Igtp/Ifi47	25
GO	BP	GO:0032760	positive regulation of tumor necrosis factor production	35/2453	91/17047	1.255e-08	5.91245e-07	ENSMUSG00000000982/ENSMUSG00000001123/ENSMUSG00000006519/ENSMUSG00000015340/ENSMUSG00000016528/ENSMUSG00000020399/ENSMUSG00000021457/ENSMUSG00000022037/ENSMUSG00000024816/ENSMUSG00000025779/ENSMUSG00000026395/ENSMUSG00000026896/ENSMUSG00000027347/ENSMUSG00000028059/ENSMUSG00000028602/ENSMUSG00000028800/ENSMUSG00000030341/ENSMUSG00000030579/ENSMUSG00000031101/ENSMUSG00000031639/ENSMUSG00000032041/…	Ccl3/Lgals9/Cyba/Cybb/Mapkapk2/Havcr2/Syk/Clu/Frmd8/Ly96/Ptprc/Ifih1/Rasgrp1/Arhgef2/Tnfrsf8/Hdac1/Tnfrsf1a/Tyrobp/Sash3/Tlr3/Tirap/Myd88/Arid5a/Nod1/Akap12/Tlr4/Thbs1/Ddx58/Isl1/Cd14/Cyp2j6/Fcer1g/Hmgb1/H2-T23/Ccr5	35
GO	BP	GO:0007159	leukocyte cell-cell adhesion	79/2453	294/17047	1.31948e-08	6.13359e-07	ENSMUSG00000000290/ENSMUSG00000000409/ENSMUSG00000000693/ENSMUSG00000000732/ENSMUSG00000001123/ENSMUSG00000002633/ENSMUSG00000004266/ENSMUSG00000005087/ENSMUSG00000007655/ENSMUSG00000007817/ENSMUSG00000016206/ENSMUSG00000016493/ENSMUSG00000016496/ENSMUSG00000018899/ENSMUSG00000019982/ENSMUSG00000020101/ENSMUSG00000020399/ENSMUSG00000020612/ENSMUSG00000020919/ENSMUSG00000021318/ENSMUSG00000021451/…	Itgb2/Lck/Loxl3/Icosl/Lgals9/Shh/Ptpn6/Cd44/Cav1/Zmiz1/H2-M3/Cd46/Cd274/Irf1/Myb/4632428N05Rik/Havcr2/Prkar1a/Stat5b/Gli3/Sema4d/Syk/Ap3b1/Il6st/Dlg5/Bmp4/Fam49b/Nckap1l/Bcl6/Cd86/Tnfrsf21/Aif1/Anxa1/Rela/Fermt3/Ptprc/Itga4/Rasgrp1/Pag1/Il21/Il6ra/Vcam1/Dtx1/Add2/Lag3/Il4ra/Sash3/Msn/Efnb1/Irak1/Casp3/Ets1/Tgfbr2/Nck1/Rac2/Nfkbiz/Tnfsf9/Pawr/Cd276/H2-Aa/Icam1/Cd81/Fgl2/Tnfrsf14/Cd24a/Ccdc88b/Igf2…	79
GO	BP	GO:0010721	negative regulation of cell development	91/2453	355/17047	1.32261e-08	6.13359e-07	ENSMUSG00000000247/ENSMUSG00000000567/ENSMUSG00000000627/ENSMUSG00000000861/ENSMUSG00000001227/ENSMUSG00000002633/ENSMUSG00000002985/ENSMUSG00000004040/ENSMUSG00000007655/ENSMUSG00000014773/ENSMUSG00000015829/ENSMUSG00000016256/ENSMUSG00000019647/ENSMUSG00000019803/ENSMUSG00000020393/ENSMUSG00000020467/ENSMUSG00000020932/ENSMUSG00000021318/ENSMUSG00000021451/ENSMUSG00000021701/ENSMUSG00000021745/…	Lhx2/Sox9/Sema4f/Bcl11a/Sema6b/Shh/Apoe/Stat3/Cav1/Dll1/Tnr/Ctsz/Sema6a/Nr2e1/Kremen1/Efemp1/Gfap/Gli3/Sema4d/Plk2/Ptprg/Bmp4/Mfi2/Il15ra/Sox8/Syt4/Fas/Gal/Sema4g/Gdf11/Fuom/Nrp1/Map4k4/Ctdsp1/Itm2c/Epha4/Rab29/Notch1/Frzb/Pax6/Efna1/Arhgef2/Fbxw7/Epha7/Npr2/Dab1/Ephb2/Sema3c/Cd38/Rest/Dtx1/Ptn/Nlgn3/Flna/Plxna3/Slit2/Mt3/Inppl1/Tmem98/Prtg/Zfp365/Fam101a/Atf5/Six3/Lrp1/Rap1gap/Tspo/Inpp5f/Isl1/T…	91
GO	BP	GO:0007157	heterophilic cell-cell adhesion via plasma membrane cell adhesion molecules	22/2453	43/17047	1.34438e-08	6.15348e-07	ENSMUSG00000001123/ENSMUSG00000005338/ENSMUSG00000006411/ENSMUSG00000013033/ENSMUSG00000016150/ENSMUSG00000022656/ENSMUSG00000024109/ENSMUSG00000024304/ENSMUSG00000027962/ENSMUSG00000028399/ENSMUSG00000032012/ENSMUSG00000032135/ENSMUSG00000036862/ENSMUSG00000040511/ENSMUSG00000040972/ENSMUSG00000047139/ENSMUSG00000048078/ENSMUSG00000048218/ENSMUSG00000050947/ENSMUSG00000063887/ENSMUSG00000068220/…	Lgals9/Cadm3/Pvrl4/Lphn1/Tenm1/Pvrl3/Nrxn1/Cdh2/Vcam1/Ptprd/Pvrl1/Mcam/Dchs1/Pvr/Igsf21/Cd24a/Tenm4/Amigo2/Amigo1/Nlgn1/Lgals1/Grid2	22
GO	BP	GO:0045665	negative regulation of neuron differentiation	67/2453	235/17047	1.34763e-08	6.15348e-07	ENSMUSG00000000567/ENSMUSG00000000627/ENSMUSG00000000861/ENSMUSG00000001227/ENSMUSG00000002633/ENSMUSG00000002985/ENSMUSG00000007655/ENSMUSG00000014773/ENSMUSG00000015829/ENSMUSG00000016256/ENSMUSG00000019647/ENSMUSG00000019803/ENSMUSG00000020393/ENSMUSG00000020467/ENSMUSG00000020932/ENSMUSG00000021318/ENSMUSG00000021451/ENSMUSG00000021701/ENSMUSG00000021745/ENSMUSG00000023206/ENSMUSG00000024176/…	Sox9/Sema4f/Bcl11a/Sema6b/Shh/Apoe/Cav1/Dll1/Tnr/Ctsz/Sema6a/Nr2e1/Kremen1/Efemp1/Gfap/Gli3/Sema4d/Plk2/Ptprg/Il15ra/Sox8/Sema4g/Gdf11/Fuom/Nrp1/Map4k4/Ctdsp1/Itm2c/Epha4/Rab29/Notch1/Pax6/Efna1/Epha7/Dab1/Ephb2/Sema3c/Cd38/Rest/Dtx1/Nlgn3/Flna/Plxna3/Slit2/Mt3/Inppl1/Zfp365/Six3/Lrp1/Rap1gap/Inpp5f/Isl1/Trim46/Rtn4rl1/Cd24a/D8Ertd82e/Rtn4rl2/Rit2/B2m/H2-K1/Sema3e/Nlgn1/Lgals1/Nr2f1/Rgma/H2-D1/Cc…	67
GO	BP	GO:1903039	positive regulation of leukocyte cell-cell adhesion	57/2453	188/17047	1.49697e-08	6.78324e-07	ENSMUSG00000000409/ENSMUSG00000000732/ENSMUSG00000001123/ENSMUSG00000002633/ENSMUSG00000005087/ENSMUSG00000007655/ENSMUSG00000007817/ENSMUSG00000016206/ENSMUSG00000016493/ENSMUSG00000016496/ENSMUSG00000018899/ENSMUSG00000019982/ENSMUSG00000020101/ENSMUSG00000020399/ENSMUSG00000020919/ENSMUSG00000021318/ENSMUSG00000021457/ENSMUSG00000021686/ENSMUSG00000021756/ENSMUSG00000022378/ENSMUSG00000022488/…	Lck/Icosl/Lgals9/Shh/Cd44/Cav1/Zmiz1/H2-M3/Cd46/Cd274/Irf1/Myb/4632428N05Rik/Havcr2/Stat5b/Gli3/Syk/Ap3b1/Il6st/Fam49b/Nckap1l/Bcl6/Cd86/Aif1/Anxa1/Rela/Ptprc/Itga4/Rasgrp1/Il21/Il6ra/Vcam1/Il4ra/Sash3/Efnb1/Irak1/Ets1/Tgfbr2/Nck1/Nfkbiz/Tnfsf9/Pawr/Cd276/H2-Aa/Icam1/Cd81/Tnfrsf14/Cd24a/Ccdc88b/Igf2/Rasal3/Cd47/Flot2/H2-T23/Lgals1/Cd59b/H2-Ab1	57
GO	BP	GO:0048813	dendrite morphogenesis	51/2453	161/17047	1.71564e-08	7.71519e-07	ENSMUSG00000001847/ENSMUSG00000002489/ENSMUSG00000005958/ENSMUSG00000006699/ENSMUSG00000019803/ENSMUSG00000019843/ENSMUSG00000019970/ENSMUSG00000020132/ENSMUSG00000021057/ENSMUSG00000021451/ENSMUSG00000022619/ENSMUSG00000022623/ENSMUSG00000023328/ENSMUSG00000025555/ENSMUSG00000025810/ENSMUSG00000026235/ENSMUSG00000026959/ENSMUSG00000027954/ENSMUSG00000028399/ENSMUSG00000028546/ENSMUSG00000028613/…	Rac1/Tiam1/Ephb3/Cdc42/Nr2e1/Fyn/Sgk1/Rab21/Akap5/Sema4d/Mapk8ip2/Shank3/Ache/Farp1/Nrp1/Epha4/Grin1/Efna1/Ptprd/Elavl4/Lrp8/Ephb2/Epha5/Ptn/Caprin2/Cdkl5/Nlgn3/Nedd4/Ptprf/Arhgap44/Rbfox2/Cacna1a/Dbn1/Eef2k/Lzts1/Shank2/Zfp365/Srcin1/Cul7/Shank1/Picalm/Reln/Cux2/Sipa1l1/Prex2/Map6/Cfl1/Camk2b/Ctnna2/Numbl/Nlgn1	51
GO	BP	GO:1903557	positive regulation of tumor necrosis factor superfamily cytokine production	35/2453	92/17047	1.74732e-08	7.79857e-07	ENSMUSG00000000982/ENSMUSG00000001123/ENSMUSG00000006519/ENSMUSG00000015340/ENSMUSG00000016528/ENSMUSG00000020399/ENSMUSG00000021457/ENSMUSG00000022037/ENSMUSG00000024816/ENSMUSG00000025779/ENSMUSG00000026395/ENSMUSG00000026896/ENSMUSG00000027347/ENSMUSG00000028059/ENSMUSG00000028602/ENSMUSG00000028800/ENSMUSG00000030341/ENSMUSG00000030579/ENSMUSG00000031101/ENSMUSG00000031639/ENSMUSG00000032041/…	Ccl3/Lgals9/Cyba/Cybb/Mapkapk2/Havcr2/Syk/Clu/Frmd8/Ly96/Ptprc/Ifih1/Rasgrp1/Arhgef2/Tnfrsf8/Hdac1/Tnfrsf1a/Tyrobp/Sash3/Tlr3/Tirap/Myd88/Arid5a/Nod1/Akap12/Tlr4/Thbs1/Ddx58/Isl1/Cd14/Cyp2j6/Fcer1g/Hmgb1/H2-T23/Ccr5	35
GO	BP	GO:0042098	T cell proliferation	57/2453	189/17047	1.84695e-08	8.143e-07	ENSMUSG00000000732/ENSMUSG00000001123/ENSMUSG00000002633/ENSMUSG00000004266/ENSMUSG00000016206/ENSMUSG00000016493/ENSMUSG00000016496/ENSMUSG00000018899/ENSMUSG00000019843/ENSMUSG00000020101/ENSMUSG00000020143/ENSMUSG00000020399/ENSMUSG00000020612/ENSMUSG00000020919/ENSMUSG00000021457/ENSMUSG00000021756/ENSMUSG00000021782/ENSMUSG00000021835/ENSMUSG00000022488/ENSMUSG00000022901/ENSMUSG00000023915/…	Icosl/Lgals9/Shh/Ptpn6/H2-M3/Cd46/Cd274/Irf1/Fyn/4632428N05Rik/Dock2/Havcr2/Prkar1a/Stat5b/Syk/Il6st/Dlg5/Bmp4/Nckap1l/Cd86/Tnfrsf21/Aif1/Anxa1/Cd151/Ptprc/Mapk8ip1/Il21/Il6ra/Vcam1/Tnfrsf1b/P2rx7/Sash3/Msn/Efnb1/Casp3/Psmb10/Tgfbr2/Nck1/Rac2/Ccnd3/Tnfsf9/Pawr/Cd276/Lmo1/H2-Aa/Cd81/Tnfrsf14/Cd24a/Ccdc88b/Igf2/Lgals3/Rasal3/Cebpb/Erbb2/H2-T23/Cd59b/H2-Ab1	57
GO	BP	GO:0019221	cytokine-mediated signaling pathway	89/2453	347/17047	1.85193e-08	8.143e-07	ENSMUSG00000000982/ENSMUSG00000002111/ENSMUSG00000002147/ENSMUSG00000002602/ENSMUSG00000002897/ENSMUSG00000004040/ENSMUSG00000004266/ENSMUSG00000005057/ENSMUSG00000005087/ENSMUSG00000007655/ENSMUSG00000014599/ENSMUSG00000017057/ENSMUSG00000018899/ENSMUSG00000018927/ENSMUSG00000019122/ENSMUSG00000020227/ENSMUSG00000020919/ENSMUSG00000021457/ENSMUSG00000021756/ENSMUSG00000022146/ENSMUSG00000022883/…	Ccl3/Spi1/Stat6/Axl/Il17ra/Stat3/Ptpn6/Sh2b2/Cd44/Cav1/Csf1/Il13ra1/Irf1/Ccl6/Ccl9/Irak3/Stat5b/Syk/Il6st/Osmr/Robo1/Parp9/Ifngr2/Ifnar2/Il15ra/Trem2/Csf1r/Fas/Rela/Rps6ka4/Ifitm1/Ifitm3/Irf7/Casp1/Il1r1/Stat1/Ptprc/Nmi/Zbp1/Il6ra/Adar/Ugcg/Tnfrsf1b/Edn2/Csf3r/Irf5/Tnfrsf1a/Il4ra/Irak1/Slit2/Gab1/Mt3/Cx3cl1/Jak3/Il10ra/Myd88/Traip/Oas2/Ptprf/Parp14/Plvap/Cxcl10/Cebpa/Ccl12/Ackr1/Stat2/Il17rd/Il17…	89
GO	CC	GO:0030175	filopodium	37/2474	104/17165	5.73363e-08	8.32623e-07	ENSMUSG00000001507/ENSMUSG00000007989/ENSMUSG00000009073/ENSMUSG00000019820/ENSMUSG00000020437/ENSMUSG00000020733/ENSMUSG00000021057/ENSMUSG00000021998/ENSMUSG00000022272/ENSMUSG00000022451/ENSMUSG00000025555/ENSMUSG00000026235/ENSMUSG00000026830/ENSMUSG00000027087/ENSMUSG00000027962/ENSMUSG00000028583/ENSMUSG00000029581/ENSMUSG00000029822/ENSMUSG00000030403/ENSMUSG00000030447/ENSMUSG00000031207/…	Itga3/Fzd3/Nf2/Utrn/Myo1g/Slc9a3r1/Akap5/Lcp1/Myo10/Twf1/Farp1/Epha4/Ermn/Itgav/Vcam1/Pdpn/Fscn1/Osbpl3/Vasp/Cyfip1/Msn/Gpr124/Gpm6a/Inppl1/Dbn1/Palm/Srcin1/Ppp1r9b/Dag1/Arl4c/Cfl1/Palld/Unc5c/Cd302/Nlgn1/Fat1/Cbx6	37
GO	BP	GO:0042129	regulation of T cell proliferation	50/2453	157/17047	1.94154e-08	8.47423e-07	ENSMUSG00000000732/ENSMUSG00000001123/ENSMUSG00000002633/ENSMUSG00000004266/ENSMUSG00000016206/ENSMUSG00000016493/ENSMUSG00000016496/ENSMUSG00000018899/ENSMUSG00000020101/ENSMUSG00000020399/ENSMUSG00000020612/ENSMUSG00000020919/ENSMUSG00000021457/ENSMUSG00000021756/ENSMUSG00000021782/ENSMUSG00000021835/ENSMUSG00000022488/ENSMUSG00000022901/ENSMUSG00000023915/ENSMUSG00000024397/ENSMUSG00000024659/…	Icosl/Lgals9/Shh/Ptpn6/H2-M3/Cd46/Cd274/Irf1/4632428N05Rik/Havcr2/Prkar1a/Stat5b/Syk/Il6st/Dlg5/Bmp4/Nckap1l/Cd86/Tnfrsf21/Aif1/Anxa1/Ptprc/Mapk8ip1/Il21/Il6ra/Vcam1/Tnfrsf1b/Sash3/Efnb1/Casp3/Tgfbr2/Nck1/Rac2/Tnfsf9/Pawr/Cd276/Lmo1/H2-Aa/Cd81/Tnfrsf14/Cd24a/Ccdc88b/Igf2/Lgals3/Rasal3/Cebpb/Erbb2/H2-T23/Cd59b/H2-Ab1	50
GO	CC	GO:0099061	integral component of postsynaptic density membrane	27/2474	64/17165	6.15145e-08	8.74291e-07	ENSMUSG00000001986/ENSMUSG00000003378/ENSMUSG00000020524/ENSMUSG00000020598/ENSMUSG00000020723/ENSMUSG00000022494/ENSMUSG00000022656/ENSMUSG00000025892/ENSMUSG00000026959/ENSMUSG00000028289/ENSMUSG00000030223/ENSMUSG00000030302/ENSMUSG00000032452/ENSMUSG00000032773/ENSMUSG00000033295/ENSMUSG00000036957/ENSMUSG00000040537/ENSMUSG00000044667/ENSMUSG00000046159/ENSMUSG00000047085/ENSMUSG00000048304/…	Gria3/Grik5/Gria1/Nrcam/Cacng4/Shisa9/Pvrl3/Gria4/Grin1/Epha7/Ptpro/Atp2b2/Clstn2/Chrm1/Ptprf/Lrfn3/Adam22/D3Bwg0562e/Chrm3/Lrrc4b/Slitrk3/Lrrc4/Neto1/Lrrc4c/Shisa6/Grid2/Lrrtm2	27
GO	BP	GO:0051668	localization within membrane	53/2453	171/17047	2.08249e-08	9.0231e-07	ENSMUSG00000000881/ENSMUSG00000001847/ENSMUSG00000002985/ENSMUSG00000003378/ENSMUSG00000006930/ENSMUSG00000019998/ENSMUSG00000020143/ENSMUSG00000020723/ENSMUSG00000020986/ENSMUSG00000021057/ENSMUSG00000022623/ENSMUSG00000022722/ENSMUSG00000024109/ENSMUSG00000024304/ENSMUSG00000025656/ENSMUSG00000026395/ENSMUSG00000026764/ENSMUSG00000027009/ENSMUSG00000028785/ENSMUSG00000029838/ENSMUSG00000030098/…	Dlg3/Rac1/Apoe/Grik5/Hap1/Stx7/Dock2/Cacng4/Sec23a/Akap5/Shank3/Arl6/Nrxn1/Cdh2/Arhgef9/Ptprc/Kif5c/Itga4/Hpca/Ptn/Grip2/Tyrobp/Gpc4/Ophn1/Flna/Sorbs2/Cdh13/Nedd4/Arhgap44/Nrxn2/Cacna1a/Dbn1/Pip5k1c/Sec31a/Cd81/Sec24d/Dag1/Magi2/Cacng5/Adam22/Agrn/Reln/Dok7/Mapk10/Cd24a/Neto1/Sec31b/Dlg2/Shisa6/Grik2/Gpc6/Anks1b/Nlgn1	53
GO	CC	GO:0098839	postsynaptic density membrane	33/2474	88/17165	6.93766e-08	9.65491e-07	ENSMUSG00000000881/ENSMUSG00000001986/ENSMUSG00000002489/ENSMUSG00000003378/ENSMUSG00000017314/ENSMUSG00000020524/ENSMUSG00000020598/ENSMUSG00000020723/ENSMUSG00000022494/ENSMUSG00000022656/ENSMUSG00000025892/ENSMUSG00000026959/ENSMUSG00000028289/ENSMUSG00000030223/ENSMUSG00000030302/ENSMUSG00000032452/ENSMUSG00000032773/ENSMUSG00000033295/ENSMUSG00000036957/ENSMUSG00000038665/ENSMUSG00000040373/…	Dlg3/Gria3/Tiam1/Grik5/Mpp2/Gria1/Nrcam/Cacng4/Shisa9/Pvrl3/Gria4/Grin1/Epha7/Ptpro/Atp2b2/Clstn2/Chrm1/Ptprf/Lrfn3/Dgki/Cacng5/Adam22/D3Bwg0562e/Chrm3/Lrrc4b/Slitrk3/Lrrc4/Neto1/Lrrc4c/Dlg2/Shisa6/Grid2/Lrrtm2	33
GO	BP	GO:0001654	eye development	92/2453	364/17047	2.29578e-08	9.8538e-07	ENSMUSG00000000247/ENSMUSG00000000567/ENSMUSG00000000617/ENSMUSG00000000753/ENSMUSG00000001288/ENSMUSG00000001521/ENSMUSG00000001750/ENSMUSG00000002633/ENSMUSG00000004040/ENSMUSG00000004891/ENSMUSG00000006445/ENSMUSG00000009073/ENSMUSG00000012609/ENSMUSG00000014361/ENSMUSG00000014773/ENSMUSG00000017491/ENSMUSG00000017639/ENSMUSG00000019803/ENSMUSG00000019943/ENSMUSG00000020122/ENSMUSG00000020467/…	Lhx2/Sox9/Grm6/Serpinf1/Rarg/Tulp3/Tcirg1/Shh/Stat3/Nes/Epha2/Nf2/Ttll5/Mertk/Dll1/Rarb/Rab11fip4/Nr2e1/Atp2b1/Egfr/Efemp1/Six6/Vsx2/Gli3/Agtpbp1/Lpcat1/Bmp4/Pvrl3/Arl6/Ache/Vegfa/Man2a1/Cyp1b1/Sox8/Celf4/Lrp5/Pde6c/Gdf11/Nrp1/Rdh10/Atp2b4/Col5a1/Zeb2/Pax6/Rpe65/Tmod1/Ephb2/Hpca/Hdac1/Smarcd3/Foxp2/Ptn/Gdf3/Trpm1/Chrdl1/Col4a1/Gpm6a/Pvrl1/Stra6/Smad3/Tgfbr2/Ptprm/Lif/Neurod1/Inhbb/Fgf2/Six3/Tgfb2…	92
GO	BP	GO:0006898	receptor-mediated endocytosis	61/2453	209/17047	2.30741e-08	9.8538e-07	ENSMUSG00000000915/ENSMUSG00000002985/ENSMUSG00000006930/ENSMUSG00000007655/ENSMUSG00000014773/ENSMUSG00000015947/ENSMUSG00000018909/ENSMUSG00000020122/ENSMUSG00000020132/ENSMUSG00000020524/ENSMUSG00000020723/ENSMUSG00000020828/ENSMUSG00000021057/ENSMUSG00000021457/ENSMUSG00000022037/ENSMUSG00000023328/ENSMUSG00000023951/ENSMUSG00000024164/ENSMUSG00000025351/ENSMUSG00000025492/ENSMUSG00000026712/…	Hip1r/Apoe/Hap1/Cav1/Dll1/Fcgr1/Arrb1/Egfr/Rab21/Gria1/Cacng4/Pld2/Akap5/Syk/Clu/Ache/Vegfa/C3/Cd63/Ifitm3/Mrc1/Itga4/Sdcbp/Cap1/Hpca/Lrpap1/Scarb2/Cd9/Cttn/Ophn1/Nlgn3/Necab2/Nedd4/Tgfbr2/Trf/Micall1/Arhgap27/Plcg2/Pip5k1c/Cd81/Picalm/Fnbp1l/Magi2/Lrp1/Cacng5/Apoc1/Ankrd13a/Inpp5f/Adrbk2/Cltb/Cd14/Siglech/Rab31/Fcer1g/Flot1/Lrrtm1/B2m/Arr3/Syt11/Fcho1/Lrrtm2	61
GO	BP	GO:0002218	activation of innate immune response	52/2453	167/17047	2.37621e-08	1.00751e-06	ENSMUSG00000001123/ENSMUSG00000006519/ENSMUSG00000007655/ENSMUSG00000016528/ENSMUSG00000017830/ENSMUSG00000018899/ENSMUSG00000020227/ENSMUSG00000020399/ENSMUSG00000020641/ENSMUSG00000021709/ENSMUSG00000022901/ENSMUSG00000024349/ENSMUSG00000024927/ENSMUSG00000025017/ENSMUSG00000025498/ENSMUSG00000025779/ENSMUSG00000026883/ENSMUSG00000026896/ENSMUSG00000027995/ENSMUSG00000029826/ENSMUSG00000030921/…	Lgals9/Cyba/Cav1/Mapkapk2/Dhx58/Irf1/Irak3/Havcr2/Rsad2/Erbb2ip/Cd86/Tmem173/Rela/Pik3ap1/Irf7/Ly96/Dab2ip/Ifih1/Tlr2/Zc3hav1/Trim30a/Irak1/Tlr3/Tirap/Myd88/Mapkapk3/Tlr13/Unc93b1/Gm4955/Ddx60/Tlr4/Ddx58/Lyn/Pyhin1/Tril/Tlr7/Prkce/Tifa/Nr1h4/Cd14/5430435G22Rik/Trim12c/Flot1/Tnip2/Trim5/Irak2/Hmgb1/Lsm14a/Tspan6/Irgm2/Ifi204/AI607873	52
GO	BP	GO:0051963	regulation of synapse assembly	40/2453	114/17047	2.51382e-08	1.0583e-06	ENSMUSG00000005958/ENSMUSG00000013033/ENSMUSG00000020704/ENSMUSG00000021451/ENSMUSG00000021782/ENSMUSG00000024109/ENSMUSG00000024647/ENSMUSG00000025555/ENSMUSG00000025656/ENSMUSG00000026959/ENSMUSG00000028072/ENSMUSG00000028184/ENSMUSG00000028289/ENSMUSG00000028399/ENSMUSG00000028664/ENSMUSG00000031119/ENSMUSG00000031302/ENSMUSG00000032012/ENSMUSG00000032452/ENSMUSG00000034730/ENSMUSG00000034912/…	Ephb3/Lphn1/Asic2/Sema4d/Dlg5/Nrxn1/Cbln2/Farp1/Arhgef9/Grin1/Ntrk1/Lphn2/Epha7/Ptprd/Ephb2/Gpc4/Nlgn3/Pvrl1/Clstn2/Bai1/Mdga2/Eef2k/Lrrn3/Lrfn3/Lphn3/Agrn/Cux2/Sipa1l1/Lrtm1/Lrrc4b/Flrt2/Amigo2/Slitrk3/Amigo1/Flrt3/Ntrk2/Lrrtm1/Nlgn1/Grid2/Lrrtm2	40
GO	BP	GO:1904062	regulation of cation transmembrane transport	86/2453	334/17047	2.64675e-08	1.10642e-06	ENSMUSG00000001750/ENSMUSG00000003161/ENSMUSG00000003352/ENSMUSG00000004266/ENSMUSG00000006519/ENSMUSG00000006930/ENSMUSG00000007655/ENSMUSG00000009687/ENSMUSG00000014077/ENSMUSG00000015968/ENSMUSG00000016933/ENSMUSG00000017400/ENSMUSG00000017412/ENSMUSG00000019843/ENSMUSG00000020573/ENSMUSG00000020577/ENSMUSG00000020704/ENSMUSG00000020723/ENSMUSG00000020733/ENSMUSG00000021313/ENSMUSG00000021478/…	Tcirg1/Sri/Cacnb3/Ptpn6/Cyba/Hap1/Cav1/Fxyd5/Chp1/Cacna1d/Plcg1/Stac2/Cacnb4/Fyn/Pik3cg/Tspan13/Asic2/Cacng4/Slc9a3r1/Ryr2/Drd1a/Bmp4/Shisa9/Mapk8ip2/Shank3/Ifngr2/Fhl1/Trem2/Ehd3/Nrxn1/Gal/Jph3/Cd63/Dbi/Atp2b4/Stom/Lrrc26/Kcnab1/Asph/Gem/Pde4b/Ephb2/Hpca/Slc9a1/Nlgn3/Flna/Cx3cl1/Agt/Ubash3b/Nedd4/Plcg2/Pkd2/Cacna1a/Cxcl10/Kcnc2/Fxyd1/Shank2/Nos1ap/Ctss/Shank1/Ptpn3/Tgfb2/Cacng5/Agrn/Lyn/Reln/S10…	86
GO	BP	GO:2001257	regulation of cation channel activity	51/2453	163/17047	2.70683e-08	1.12362e-06	ENSMUSG00000003161/ENSMUSG00000003352/ENSMUSG00000006930/ENSMUSG00000007655/ENSMUSG00000016933/ENSMUSG00000017400/ENSMUSG00000017412/ENSMUSG00000020704/ENSMUSG00000020723/ENSMUSG00000021835/ENSMUSG00000022494/ENSMUSG00000022619/ENSMUSG00000022623/ENSMUSG00000022965/ENSMUSG00000023992/ENSMUSG00000024065/ENSMUSG00000024109/ENSMUSG00000024907/ENSMUSG00000025318/ENSMUSG00000026880/ENSMUSG00000026961/…	Sri/Cacnb3/Hap1/Cav1/Plcg1/Stac2/Cacnb4/Asic2/Cacng4/Bmp4/Shisa9/Mapk8ip2/Shank3/Ifngr2/Trem2/Ehd3/Nrxn1/Gal/Jph3/Stom/Lrrc26/Kcnab1/Asph/Gem/Pde4b/Ephb2/Hpca/Nlgn3/Plcg2/Pkd2/Cacna1a/Kcnc2/Shank2/Nos1ap/Ctss/Shank1/Cacng5/Reln/S100a1/Kcna1/P2ry6/Neto1/Amigo1/Sepn1/Prkg1/Shisa6/Cfl1/Kcnc1/Nlgn1/Ank3/Ahnak	51
GO	CC	GO:0005925	focal adhesion	51/2474	168/17165	8.51727e-08	1.16113e-06	ENSMUSG00000003283/ENSMUSG00000006219/ENSMUSG00000006445/ENSMUSG00000006519/ENSMUSG00000007655/ENSMUSG00000015533/ENSMUSG00000018340/ENSMUSG00000020653/ENSMUSG00000020758/ENSMUSG00000021262/ENSMUSG00000021998/ENSMUSG00000022178/ENSMUSG00000022438/ENSMUSG00000022443/ENSMUSG00000023348/ENSMUSG00000025239/ENSMUSG00000025278/ENSMUSG00000025321/ENSMUSG00000025810/ENSMUSG00000026074/ENSMUSG00000026395/…	Hck/Fblim1/Epha2/Cyba/Cav1/Itga2/Anxa6/Klf11/Itgb4/Evl/Lcp1/Ajuba/Parvb/Myh9/Trip6/Limd1/Flnb/Itgb8/Nrp1/Map4k4/Ptprc/Capn2/Rsu1/Apbb1ip/Itgav/Mapre1/Cpne3/Sdcbp/Zyx/Vasp/Parva/Cttn/Msn/Sorbs2/Itga2b/Bai1/Tle2/Pip5k1c/Wtip/Asap3/Tenc1/Fermt2/Lasp1/Dag1/Rhou/Flrt2/D8Ertd82e/Flrt3/Cfl1/Palld/Mapk3	51
GO	BP	GO:1903037	regulation of leukocyte cell-cell adhesion	72/2453	264/17047	2.98082e-08	1.22876e-06	ENSMUSG00000000409/ENSMUSG00000000693/ENSMUSG00000000732/ENSMUSG00000001123/ENSMUSG00000002633/ENSMUSG00000004266/ENSMUSG00000005087/ENSMUSG00000007655/ENSMUSG00000007817/ENSMUSG00000016206/ENSMUSG00000016493/ENSMUSG00000016496/ENSMUSG00000018899/ENSMUSG00000019982/ENSMUSG00000020101/ENSMUSG00000020399/ENSMUSG00000020612/ENSMUSG00000020919/ENSMUSG00000021318/ENSMUSG00000021457/ENSMUSG00000021686/…	Lck/Loxl3/Icosl/Lgals9/Shh/Ptpn6/Cd44/Cav1/Zmiz1/H2-M3/Cd46/Cd274/Irf1/Myb/4632428N05Rik/Havcr2/Prkar1a/Stat5b/Gli3/Syk/Ap3b1/Il6st/Dlg5/Bmp4/Fam49b/Nckap1l/Bcl6/Cd86/Tnfrsf21/Aif1/Anxa1/Rela/Ptprc/Itga4/Rasgrp1/Pag1/Il21/Il6ra/Vcam1/Dtx1/Lag3/Il4ra/Sash3/Efnb1/Irak1/Casp3/Ets1/Tgfbr2/Nck1/Nfkbiz/Tnfsf9/Pawr/Cd276/H2-Aa/Icam1/Cd81/Fgl2/Tnfrsf14/Cd24a/Ccdc88b/Igf2/Rasal3/Zfp608/Cd47/Cebpb/Flot2/Er…	72
GO	BP	GO:0048167	regulation of synaptic plasticity	59/2453	201/17047	3.11218e-08	1.27406e-06	ENSMUSG00000001847/ENSMUSG00000002985/ENSMUSG00000006435/ENSMUSG00000010825/ENSMUSG00000015829/ENSMUSG00000015837/ENSMUSG00000017314/ENSMUSG00000019803/ENSMUSG00000020524/ENSMUSG00000020932/ENSMUSG00000021478/ENSMUSG00000021701/ENSMUSG00000022208/ENSMUSG00000022494/ENSMUSG00000022623/ENSMUSG00000022790/ENSMUSG00000024261/ENSMUSG00000024743/ENSMUSG00000025318/ENSMUSG00000026235/ENSMUSG00000026249/…	Rac1/Apoe/Neurl1a/Grid2ip/Tnr/Sqstm1/Mpp2/Nr2e1/Gria1/Gfap/Drd1a/Plk2/Jph4/Shisa9/Shank3/Igsf11/Syt4/Syt7/Jph3/Epha4/Serpine2/Dbi/Slc4a10/Grin1/Map1a/Ephb2/Ncdn/Cd38/Sorcs2/Ptn/Atp2b2/Tyrobp/Nlgn3/Agt/Dbn1/Bai1/Lzts1/Shank2/Egr2/Slc24a2/Dgki/Shank1/Adora1/Reln/Sipa1l1/Synpo/Kcnj10/Syt12/Neto1/Cx3cr1/Shisa6/Ntrk2/Grik2/Cfl1/Camk2b/Lrrtm1/Nlgn1/Grid2/Lrrtm2	59
GO	CC	GO:0030055	cell-substrate junction	53/2474	178/17165	9.71544e-08	1.29798e-06	ENSMUSG00000003283/ENSMUSG00000006219/ENSMUSG00000006445/ENSMUSG00000006519/ENSMUSG00000007655/ENSMUSG00000015533/ENSMUSG00000018340/ENSMUSG00000020653/ENSMUSG00000020758/ENSMUSG00000021262/ENSMUSG00000021709/ENSMUSG00000021998/ENSMUSG00000022178/ENSMUSG00000022438/ENSMUSG00000022443/ENSMUSG00000023348/ENSMUSG00000025064/ENSMUSG00000025239/ENSMUSG00000025278/ENSMUSG00000025321/ENSMUSG00000025810/…	Hck/Fblim1/Epha2/Cyba/Cav1/Itga2/Anxa6/Klf11/Itgb4/Evl/Erbb2ip/Lcp1/Ajuba/Parvb/Myh9/Trip6/Col17a1/Limd1/Flnb/Itgb8/Nrp1/Map4k4/Ptprc/Capn2/Rsu1/Apbb1ip/Itgav/Mapre1/Cpne3/Sdcbp/Zyx/Vasp/Parva/Cttn/Msn/Sorbs2/Itga2b/Bai1/Tle2/Pip5k1c/Wtip/Asap3/Tenc1/Fermt2/Lasp1/Dag1/Rhou/Flrt2/D8Ertd82e/Flrt3/Cfl1/Palld/Mapk3	53
GO	BP	GO:0071248	cellular response to metal ion	56/2453	187/17047	3.22527e-08	1.31131e-06	ENSMUSG00000000263/ENSMUSG00000000753/ENSMUSG00000002633/ENSMUSG00000003545/ENSMUSG00000003849/ENSMUSG00000004952/ENSMUSG00000005413/ENSMUSG00000006764/ENSMUSG00000009292/ENSMUSG00000013275/ENSMUSG00000015340/ENSMUSG00000015839/ENSMUSG00000015950/ENSMUSG00000020122/ENSMUSG00000022212/ENSMUSG00000024109/ENSMUSG00000024112/ENSMUSG00000024261/ENSMUSG00000024743/ENSMUSG00000024778/ENSMUSG00000026193/…	Glra1/Serpinf1/Shh/Fosb/Nqo1/Rasa4/Hmox1/Tph2/Trpm2/Slc41a1/Cybb/Nfe2l2/Ncf1/Egfr/Cpne6/Nrxn1/Cacna1h/Syt4/Syt7/Fas/Fn1/Parp1/Anxa5/Asph/Cpne3/Hpca/P2rx4/Eif2ak3/Mt3/Mt2/Mt1/Gsta4/Trf/Cpne2/Pkd2/Cpne7/Cebpa/Eef2k/Syt1/Syt15/Tspo/Kcna1/Kcnk3/Syt12/Cpne8/Dlg2/Jun/Junb/B2m/Syt9/Mapk3/Nlgn1/Syt11/Ank3/Jund/Capn3	56
GO	BP	GO:0002695	negative regulation of leukocyte activation	51/2453	164/17047	3.38587e-08	1.36725e-06	ENSMUSG00000000693/ENSMUSG00000001123/ENSMUSG00000002602/ENSMUSG00000002633/ENSMUSG00000004266/ENSMUSG00000005413/ENSMUSG00000009681/ENSMUSG00000010142/ENSMUSG00000014361/ENSMUSG00000016206/ENSMUSG00000016496/ENSMUSG00000017631/ENSMUSG00000018899/ENSMUSG00000020101/ENSMUSG00000020399/ENSMUSG00000020612/ENSMUSG00000021318/ENSMUSG00000021782/ENSMUSG00000021835/ENSMUSG00000022508/ENSMUSG00000022876/…	Loxl3/Lgals9/Axl/Shh/Ptpn6/Hmox1/Bcr/Tnfrsf13b/Mertk/H2-M3/Cd274/Abr/Irf1/4632428N05Rik/Havcr2/Prkar1a/Gli3/Dlg5/Bmp4/Bcl6/Samsn1/Cd86/Parp3/Tnfrsf21/Anxa1/Fas/Gal/Pag1/Dtx1/Lag3/Tyrobp/Il4ra/Cd37/Casp3/Cx3cl1/Grn/Pawr/Cd276/H2-Aa/Cd84/Fgl2/Lyn/Tnfrsf14/Cd24a/Zfp608/Fam19a3/Cebpb/Erbb2/Cst7/H2-Ab1/Nrarp	51
GO	BP	GO:0043547	positive regulation of GTPase activity	88/2453	347/17047	3.90954e-08	1.56804e-06	ENSMUSG00000000982/ENSMUSG00000001768/ENSMUSG00000002489/ENSMUSG00000004056/ENSMUSG00000004633/ENSMUSG00000004952/ENSMUSG00000006445/ENSMUSG00000009681/ENSMUSG00000016128/ENSMUSG00000017631/ENSMUSG00000018909/ENSMUSG00000018927/ENSMUSG00000019122/ENSMUSG00000019775/ENSMUSG00000020135/ENSMUSG00000020143/ENSMUSG00000020986/ENSMUSG00000021215/ENSMUSG00000021219/ENSMUSG00000021451/ENSMUSG00000021886/…	Ccl3/Rin2/Tiam1/Akt2/Chn2/Rasa4/Epha2/Bcr/Stard13/Abr/Arrb1/Ccl6/Ccl9/Rgs17/Apc2/Dock2/Sec23a/Net1/Rgs6/Sema4d/Gpr65/Nckap1l/Arhgdia/Nrp1/Rgs5/Rsu1/Dab2ip/Rasgrp1/Ntrk1/Dock7/Acap3/Rgs12/Tbc1d1/Srgap3/Rgs10/Ophn1/Cdkl5/Arhgap6/Rasa3/Tbc1d9/Gnao1/Cx3cl1/Rasa2/Arap1/Arhgap44/Mtss1l/Vav1/Arhgap27/Ccl12/Hmha1/Dock4/Fam13b/Arhgap21/Asap3/Icam1/Arap2/Plekhg6/F11r/Sgsm2/Tbc1d25/Picalm/Prex1/Rgl3/Arhgap9…	88
GO	BP	GO:0099068	postsynapse assembly	18/2453	32/17047	4.09759e-08	1.63244e-06	ENSMUSG00000022623/ENSMUSG00000024109/ENSMUSG00000024304/ENSMUSG00000025656/ENSMUSG00000028399/ENSMUSG00000028664/ENSMUSG00000031302/ENSMUSG00000033768/ENSMUSG00000037541/ENSMUSG00000038738/ENSMUSG00000040003/ENSMUSG00000042453/ENSMUSG00000042700/ENSMUSG00000047085/ENSMUSG00000060780/ENSMUSG00000063887/ENSMUSG00000071424/ENSMUSG00000071862	Shank3/Nrxn1/Cdh2/Arhgef9/Ptprd/Ephb2/Nlgn3/Nrxn2/Shank2/Shank1/Magi2/Reln/Sipa1l1/Lrrc4b/Lrrtm1/Nlgn1/Grid2/Lrrtm2	18
GO	BP	GO:0042060	wound healing	94/2453	379/17047	4.31689e-08	1.70276e-06	ENSMUSG00000001131/ENSMUSG00000001930/ENSMUSG00000002233/ENSMUSG00000002602/ENSMUSG00000002633/ENSMUSG00000002985/ENSMUSG00000003534/ENSMUSG00000004266/ENSMUSG00000005087/ENSMUSG00000005413/ENSMUSG00000007655/ENSMUSG00000008398/ENSMUSG00000014361/ENSMUSG00000015533/ENSMUSG00000015839/ENSMUSG00000018340/ENSMUSG00000020120/ENSMUSG00000020122/ENSMUSG00000021262/ENSMUSG00000021318/ENSMUSG00000021457/…	Timp1/Vwf/Rhoc/Axl/Shh/Apoe/Ddr1/Ptpn6/Cd44/Hmox1/Cav1/Elk3/Mertk/Itga2/Nfe2l2/Anxa6/Plek/Egfr/Evl/Gli3/Syk/Ap3b1/Ajuba/Myh9/Pros1/Serping1/Smoc2/Tnfrsf12a/C3/Hbegf/Anxa1/Syt7/Fermt3/Cd151/Cflar/Fn1/Serpine2/Vangl2/Col5a1/Notch1/Anxa5/Adam15/F3/Cyr61/Epb4.1l4b/Pdpn/Ptn/Tgfa/Cd9/Flna/Casp3/Cx3cl1/Ubash3b/Ets1/Mcam/Rab27a/Smad3/Tgfbr2/Itga2b/Pip5k1c/Igsf10/P2ry12/Fgf2/Cd81/Bcl9/Tlr4/Itga9/Tgfb2/Dag…	94
GO	BP	GO:0007229	integrin-mediated signaling pathway	36/2453	99/17047	4.33147e-08	1.70276e-06	ENSMUSG00000000290/ENSMUSG00000000693/ENSMUSG00000001131/ENSMUSG00000001507/ENSMUSG00000015533/ENSMUSG00000015647/ENSMUSG00000019997/ENSMUSG00000020120/ENSMUSG00000020758/ENSMUSG00000020926/ENSMUSG00000021065/ENSMUSG00000021457/ENSMUSG00000022148/ENSMUSG00000024965/ENSMUSG00000025321/ENSMUSG00000025351/ENSMUSG00000025810/ENSMUSG00000027009/ENSMUSG00000027087/ENSMUSG00000027646/ENSMUSG00000028041/…	Itgb2/Loxl3/Timp1/Itga3/Itga2/Lama5/Ctgf/Plek/Itgb4/Adam11/Fut8/Syk/Fyb/Fermt3/Itgb8/Cd63/Nrp1/Itga4/Itgav/Src/Adam15/Fgr/Ptn/Zyx/Tyrobp/Itgam/Itgax/Flna/Vav3/Vav1/Itga2b/Isg15/Fermt2/Itga9/Adam22/Fcer1g	36
GO	BP	GO:0002521	leukocyte differentiation	116/2453	497/17047	4.53598e-08	1.77142e-06	ENSMUSG00000000409/ENSMUSG00000000693/ENSMUSG00000000861/ENSMUSG00000000957/ENSMUSG00000000982/ENSMUSG00000001123/ENSMUSG00000001750/ENSMUSG00000002111/ENSMUSG00000002147/ENSMUSG00000002602/ENSMUSG00000002633/ENSMUSG00000002799/ENSMUSG00000002983/ENSMUSG00000004040/ENSMUSG00000004266/ENSMUSG00000004508/ENSMUSG00000004707/ENSMUSG00000006362/ENSMUSG00000006445/ENSMUSG00000007817/ENSMUSG00000008496/…	Lck/Loxl3/Bcl11a/Mmp14/Ccl3/Lgals9/Tcirg1/Spi1/Stat6/Axl/Shh/Jag2/Relb/Stat3/Ptpn6/Gab2/Ly9/Cbfa2t3/Epha2/Zmiz1/Pou2f2/Trpm2/Mertk/Csf1/Dll1/H2-M3/Cd46/Ikzf1/Irf1/Myb/4632428N05Rik/Dock2/Rsad2/Stat5b/Zfp36l1/Gli3/Syk/Ror2/Ap3b1/Bmp4/Myh9/Hdac7/Nckap1l/Bcl6/Runx1/Il15ra/Tmem176a/Vegfa/Trem2/Glo1/Csf1r/Anxa1/Fas/Fasn/Casp8/Ptprc/Rassf2/Rasgrp1/Src/Il21/Ntrk1/Fbxw7/Rhoh/Lfng/Dtx1/Tmem176b/Lag3/Clec2…	116
GO	BP	GO:0060326	cell chemotaxis	71/2453	262/17047	4.90509e-08	1.90305e-06	ENSMUSG00000000982/ENSMUSG00000001847/ENSMUSG00000002489/ENSMUSG00000002633/ENSMUSG00000002897/ENSMUSG00000004791/ENSMUSG00000006445/ENSMUSG00000009292/ENSMUSG00000009376/ENSMUSG00000014599/ENSMUSG00000018927/ENSMUSG00000019122/ENSMUSG00000021194/ENSMUSG00000021457/ENSMUSG00000021508/ENSMUSG00000021702/ENSMUSG00000022425/ENSMUSG00000022488/ENSMUSG00000023088/ENSMUSG00000023886/ENSMUSG00000023951/…	Ccl3/Rac1/Tiam1/Shh/Il17ra/Pgf/Epha2/Trpm2/Met/Csf1/Ccl6/Ccl9/Chga/Syk/Cxcl14/Thbs4/Enpp2/Nckap1l/Abcc1/Smoc2/Vegfa/Aif1/Hbegf/Slc12a2/Anxa1/Nrp1/Notch1/Rab13/Vcam1/Pde4b/Edn2/Csf3r/P2rx4/Flt1/Ptn/Ptpro/Parva/Slit2/Fgfr1/Gab1/Cx3cl1/Jam3/Slc8b1/Rac2/Vav3/Vav1/Cxcl10/Ccl12/Dock4/Fgf2/Itga9/Tgfb2/Prex1/Thbs1/C3ar1/Nbl1/Cmklr1/Lyn/Hsd3b7/C5ar1/Lgals3/Ch25h/Cx3cr1/Fcer1g/Mospd2/Kdr/Mapk3/Ano6/Hmgb1/C…	71
GO	BP	GO:0001909	leukocyte mediated cytotoxicity	38/2453	108/17047	5.12106e-08	1.97393e-06	ENSMUSG00000001123/ENSMUSG00000004266/ENSMUSG00000004626/ENSMUSG00000015947/ENSMUSG00000015950/ENSMUSG00000016206/ENSMUSG00000019998/ENSMUSG00000020399/ENSMUSG00000020919/ENSMUSG00000022378/ENSMUSG00000024339/ENSMUSG00000026395/ENSMUSG00000027347/ENSMUSG00000027718/ENSMUSG00000028691/ENSMUSG00000028793/ENSMUSG00000029468/ENSMUSG00000030124/ENSMUSG00000030157/ENSMUSG00000030560/ENSMUSG00000030579/…	Lgals9/Ptpn6/Stxbp2/Fcgr1/Ncf1/H2-M3/Stx7/Havcr2/Stat5b/Fam49b/Tap2/Ptprc/Rasgrp1/Il21/Prdx1/Rnf19b/P2rx7/Lag3/Clec2d/Ctsc/Tyrobp/Rab27a/Ctsh/Vav1/H2-Q4/Tap1/Pvr/Mill2/Igf2/H2-T22/H2-Q7/B2m/H2-K1/Pvrl2/H2-T23/H2-Q6/H2-D1/H60b	38
GO	BP	GO:0050890	cognition	80/2453	308/17047	5.36898e-08	2.05615e-06	ENSMUSG00000000326/ENSMUSG00000000594/ENSMUSG00000000753/ENSMUSG00000001507/ENSMUSG00000002985/ENSMUSG00000005142/ENSMUSG00000015829/ENSMUSG00000018581/ENSMUSG00000019970/ENSMUSG00000020122/ENSMUSG00000020142/ENSMUSG00000020524/ENSMUSG00000020654/ENSMUSG00000021448/ENSMUSG00000021478/ENSMUSG00000021701/ENSMUSG00000021877/ENSMUSG00000022208/ENSMUSG00000022619/ENSMUSG00000022623/ENSMUSG00000022946/…	Comt/Gm2a/Serpinf1/Itga3/Apoe/Man2b1/Tnr/Dnah11/Sgk1/Egfr/Slc1a4/Gria1/Adcy3/Shc3/Drd1a/Plk2/Arf4/Jph4/Mapk8ip2/Shank3/Dopey2/Cbr3/Asic1/Nrxn1/Syt4/Fosl1/Jph3/Casp1/Dbi/Grin1/Pax6/Map1a/Kcnab1/Ntrk1/Elavl4/Ephb2/Foxp2/Ptn/Chl1/Slc6a1/Cyfip1/Nlgn3/Ap1s2/Casp3/Agt/St3gal4/Tmod2/Stra6/Chrm1/Nrxn2/Tanc1/Shank2/Egr2/Slc24a2/Sobp/Dgki/Shank1/Ppp1r9b/Picalm/Cntnap2/Rcan2/Adora1/Reln/Cux2/Synpo/C1ql1/Ptg…	80
GO	BP	GO:0022612	gland morphogenesis	43/2453	130/17047	5.53472e-08	2.10603e-06	ENSMUSG00000000567/ENSMUSG00000001288/ENSMUSG00000002147/ENSMUSG00000002633/ENSMUSG00000003534/ENSMUSG00000003644/ENSMUSG00000006445/ENSMUSG00000006699/ENSMUSG00000006800/ENSMUSG00000007655/ENSMUSG00000008575/ENSMUSG00000014599/ENSMUSG00000015647/ENSMUSG00000016918/ENSMUSG00000017724/ENSMUSG00000020019/ENSMUSG00000020122/ENSMUSG00000020733/ENSMUSG00000021318/ENSMUSG00000021835/ENSMUSG00000024913/…	Sox9/Rarg/Stat6/Shh/Ddr1/Rps6ka1/Epha2/Cdc42/Sulf2/Cav1/Nfib/Csf1/Lama5/Sulf1/Etv4/Ntn4/Egfr/Slc9a3r1/Gli3/Bmp4/Lrp5/Nrp1/Cflar/Notch1/Pax6/Src/Tfap2c/Sema3c/Areg/Ptn/Tgfa/Plxna1/Itpr1/Plxnd1/Msn/Slit2/Fgfr1/Tgfbr2/Ctnnd1/Tgm2/Tgfb2/Dag1/Cebpb	43
GO	BP	GO:0002696	positive regulation of leukocyte activation	75/2453	283/17047	5.70695e-08	2.15774e-06	ENSMUSG00000000409/ENSMUSG00000000732/ENSMUSG00000000957/ENSMUSG00000001123/ENSMUSG00000002147/ENSMUSG00000002602/ENSMUSG00000002633/ENSMUSG00000004626/ENSMUSG00000007655/ENSMUSG00000007817/ENSMUSG00000016206/ENSMUSG00000016493/ENSMUSG00000016496/ENSMUSG00000018899/ENSMUSG00000019982/ENSMUSG00000020101/ENSMUSG00000020399/ENSMUSG00000020828/ENSMUSG00000020919/ENSMUSG00000021318/ENSMUSG00000021457/…	Lck/Icosl/Mmp14/Lgals9/Stat6/Axl/Shh/Stxbp2/Cav1/Zmiz1/H2-M3/Cd46/Cd274/Irf1/Myb/4632428N05Rik/Havcr2/Pld2/Stat5b/Gli3/Syk/Ap3b1/Il6st/Fam49b/Nckap1l/Bcl6/Cd86/Il15ra/Trem2/Aif1/Anxa1/Il33/Ptprc/Rasgrp1/Nfatc2/Il21/Il6ra/Vcam1/Fgr/Cd38/Ctsc/Tyrobp/Il4ra/Sash3/Efnb1/Tgfbr2/Nck1/Myd88/Vav3/Cebpa/Nfkbiz/Tnfsf9/Cd276/H2-Aa/C1qa/Cd81/Tlr4/Thbs1/Clcf1/Tox/Tnfrsf14/Cd24a/Ccdc88b/Igf2/Rasal3/Cd47/Fam19a3…	75
GO	BP	GO:0032943	mononuclear cell proliferation	72/2453	268/17047	5.78691e-08	2.17412e-06	ENSMUSG00000000732/ENSMUSG00000001123/ENSMUSG00000002633/ENSMUSG00000004266/ENSMUSG00000010142/ENSMUSG00000014599/ENSMUSG00000016206/ENSMUSG00000016493/ENSMUSG00000016496/ENSMUSG00000018899/ENSMUSG00000019843/ENSMUSG00000020101/ENSMUSG00000020143/ENSMUSG00000020399/ENSMUSG00000020612/ENSMUSG00000020919/ENSMUSG00000021457/ENSMUSG00000021624/ENSMUSG00000021756/ENSMUSG00000021782/ENSMUSG00000021835/…	Icosl/Lgals9/Shh/Ptpn6/Tnfrsf13b/Csf1/H2-M3/Cd46/Cd274/Irf1/Fyn/4632428N05Rik/Dock2/Havcr2/Prkar1a/Stat5b/Syk/Cd180/Il6st/Dlg5/Bmp4/Nckap1l/Bcl6/St6gal1/Cd86/Tnfrsf21/Aif1/Anxa1/Gal/Cd151/Ptprc/Mapk8ip1/Nfatc2/Il21/Il6ra/Vcam1/Tnfrsf1b/Cd38/P2rx7/Tyrobp/Sash3/Msn/Efnb1/Casp3/Psmb10/Tgfbr2/Nck1/Myd88/Rac2/Vav3/Ccnd3/Tnfsf9/Pawr/Cd276/Lmo1/H2-Aa/Cd81/Plcl2/Tlr4/Clcf1/Lyn/Tnfrsf14/Cd24a/Ccdc88b/Igf2…	72
GO	BP	GO:1900006	positive regulation of dendrite development	35/2453	96/17047	6.16008e-08	2.29976e-06	ENSMUSG00000001847/ENSMUSG00000002489/ENSMUSG00000002985/ENSMUSG00000006435/ENSMUSG00000019970/ENSMUSG00000020132/ENSMUSG00000020173/ENSMUSG00000021057/ENSMUSG00000021782/ENSMUSG00000022623/ENSMUSG00000023328/ENSMUSG00000026235/ENSMUSG00000026883/ENSMUSG00000028399/ENSMUSG00000028546/ENSMUSG00000028613/ENSMUSG00000029838/ENSMUSG00000030272/ENSMUSG00000030309/ENSMUSG00000030447/ENSMUSG00000031292/…	Rac1/Tiam1/Apoe/Neurl1a/Sgk1/Rab21/Cobl/Akap5/Dlg5/Shank3/Ache/Epha4/Dab2ip/Ptprd/Elavl4/Lrp8/Ptn/Camk1/Caprin2/Cyfip1/Cdkl5/Nlgn3/Ptprf/Dbn1/Eef2k/Shank2/Cul7/Shank1/Reln/Cux2/Alk/Cfl1/Camk2b/Numbl/Nlgn1	35
GO	BP	GO:0006909	phagocytosis	57/2453	195/17047	6.21881e-08	2.30718e-06	ENSMUSG00000001847/ENSMUSG00000002602/ENSMUSG00000003283/ENSMUSG00000004319/ENSMUSG00000006519/ENSMUSG00000006699/ENSMUSG00000009681/ENSMUSG00000014361/ENSMUSG00000015243/ENSMUSG00000015533/ENSMUSG00000015947/ENSMUSG00000017631/ENSMUSG00000020143/ENSMUSG00000020437/ENSMUSG00000021457/ENSMUSG00000022443/ENSMUSG00000022488/ENSMUSG00000022912/ENSMUSG00000023206/ENSMUSG00000023992/ENSMUSG00000024164/…	Rac1/Axl/Hck/Clcn3/Cyba/Cdc42/Bcr/Mertk/Abca1/Itga2/Fcgr1/Abr/Dock2/Myo1g/Syk/Myh9/Nckap1l/Pros1/Il15ra/Trem2/C3/Aif1/Megf10/Anxa1/Syt7/Ptprc/Ncf2/Itgav/Tmem55a/Fgr/P2rx7/Tyrobp/Rab27a/Myd88/Vav1/Bai1/Pip5k1c/Tgm2/Tlr4/Thbs1/Lrp1/Elmo1/Rap1gap/Irf8/Cdc42se1/P2ry6/Xkr4/Pld4/5430435G22Rik/Cd47/Prtn3/Dock1/Fcer1g/Cd302/Ano6/Hmgb1/Syt11	57
GO	BP	GO:0051966	regulation of synaptic transmission, glutamatergic	28/2453	68/17047	6.36959e-08	2.34844e-06	ENSMUSG00000000617/ENSMUSG00000001985/ENSMUSG00000015829/ENSMUSG00000020122/ENSMUSG00000020723/ENSMUSG00000021464/ENSMUSG00000021478/ENSMUSG00000022619/ENSMUSG00000022623/ENSMUSG00000024109/ENSMUSG00000024304/ENSMUSG00000025892/ENSMUSG00000026249/ENSMUSG00000028072/ENSMUSG00000030898/ENSMUSG00000031214/ENSMUSG00000031302/ENSMUSG00000035864/ENSMUSG00000037541/ENSMUSG00000038665/ENSMUSG00000038738/…	Grm6/Grik3/Tnr/Egfr/Cacng4/Ror2/Drd1a/Mapk8ip2/Shank3/Nrxn1/Cdh2/Gria4/Serpine2/Ntrk1/Cckbr/Ophn1/Nlgn3/Syt1/Shank2/Dgki/Shank1/Cacng5/Adora1/Reln/Ntrk2/Grik2/Grm7/Nlgn1	28
GO	MF	GO:0019199	transmembrane receptor protein kinase activity	31/2478	74/17092	9.29302e-09	2.46265e-06	ENSMUSG00000002602/ENSMUSG00000003534/ENSMUSG00000005320/ENSMUSG00000005958/ENSMUSG00000006445/ENSMUSG00000009376/ENSMUSG00000014361/ENSMUSG00000020122/ENSMUSG00000020467/ENSMUSG00000021464/ENSMUSG00000024621/ENSMUSG00000025810/ENSMUSG00000025969/ENSMUSG00000026235/ENSMUSG00000026836/ENSMUSG00000028072/ENSMUSG00000028289/ENSMUSG00000028664/ENSMUSG00000028876/ENSMUSG00000029245/ENSMUSG00000029287/…	Axl/Ddr1/Fgfr4/Ephb3/Epha2/Met/Mertk/Egfr/Efemp1/Ror2/Csf1r/Nrp1/Nrp2/Epha4/Acvr1/Ntrk1/Epha7/Ephb2/Epha10/Epha5/Tgfbr3/Flt1/Fgfr1/Tgfbr2/Flt3/Bmpr1b/Ntrk2/Alk/Acvr2b/Erbb2/Kdr	31
GO	BP	GO:0051480	regulation of cytosolic calcium ion concentration	92/2453	372/17047	6.9242e-08	2.53716e-06	ENSMUSG00000000409/ENSMUSG00000000682/ENSMUSG00000000982/ENSMUSG00000002083/ENSMUSG00000003161/ENSMUSG00000003352/ENSMUSG00000004113/ENSMUSG00000004266/ENSMUSG00000006519/ENSMUSG00000006930/ENSMUSG00000007655/ENSMUSG00000009292/ENSMUSG00000010660/ENSMUSG00000015968/ENSMUSG00000016933/ENSMUSG00000017412/ENSMUSG00000019843/ENSMUSG00000019943/ENSMUSG00000020524/ENSMUSG00000020573/ENSMUSG00000020866/…	Lck/Cd52/Ccl3/Bbc3/Sri/Cacnb3/Cacna1b/Ptpn6/Cyba/Hap1/Cav1/Trpm2/Plcd1/Cacna1d/Plcg1/Cacnb4/Fyn/Atp2b1/Gria1/Pik3cg/Cacna1g/Akap5/Chga/Ryr2/Drd1a/Il6st/Bmp4/Jph4/Npff/Plce1/Jph3/Dbi/Ptprc/Atp2b4/Grin1/Itgav/Ptgfr/Asph/Edn2/Cd38/P2rx7/P2rx4/Itpr1/Erc1/Atp2b2/Trpm1/Calca/Cckbr/Rasa3/Cx3cl1/Agt/Ubash3b/Smad3/Pth1r/Slc8b1/Pkd1/Plcg2/Pkd2/Cacna1a/Gna15/Cxcl10/Pawr/Fxyd1/Fgf2/Tgm2/Tgfb2/Lrp1/C3ar1/Cmkl…	92
GO	CC	GO:0005924	cell-substrate adherens junction	51/2474	172/17165	1.94629e-07	2.54925e-06	ENSMUSG00000003283/ENSMUSG00000006219/ENSMUSG00000006445/ENSMUSG00000006519/ENSMUSG00000007655/ENSMUSG00000015533/ENSMUSG00000018340/ENSMUSG00000020653/ENSMUSG00000020758/ENSMUSG00000021262/ENSMUSG00000021998/ENSMUSG00000022178/ENSMUSG00000022438/ENSMUSG00000022443/ENSMUSG00000023348/ENSMUSG00000025239/ENSMUSG00000025278/ENSMUSG00000025321/ENSMUSG00000025810/ENSMUSG00000026074/ENSMUSG00000026395/…	Hck/Fblim1/Epha2/Cyba/Cav1/Itga2/Anxa6/Klf11/Itgb4/Evl/Lcp1/Ajuba/Parvb/Myh9/Trip6/Limd1/Flnb/Itgb8/Nrp1/Map4k4/Ptprc/Capn2/Rsu1/Apbb1ip/Itgav/Mapre1/Cpne3/Sdcbp/Zyx/Vasp/Parva/Cttn/Msn/Sorbs2/Itga2b/Bai1/Tle2/Pip5k1c/Wtip/Asap3/Tenc1/Fermt2/Lasp1/Dag1/Rhou/Flrt2/D8Ertd82e/Flrt3/Cfl1/Palld/Mapk3	51
GO	BP	GO:0050773	regulation of dendrite development	52/2453	172/17047	7.01424e-08	2.55439e-06	ENSMUSG00000000632/ENSMUSG00000000861/ENSMUSG00000001847/ENSMUSG00000002489/ENSMUSG00000002985/ENSMUSG00000006435/ENSMUSG00000019803/ENSMUSG00000019970/ENSMUSG00000020132/ENSMUSG00000020173/ENSMUSG00000021057/ENSMUSG00000021451/ENSMUSG00000021701/ENSMUSG00000021782/ENSMUSG00000022311/ENSMUSG00000022623/ENSMUSG00000023328/ENSMUSG00000026235/ENSMUSG00000026620/ENSMUSG00000026883/ENSMUSG00000026959/…	Sez6/Bcl11a/Rac1/Tiam1/Apoe/Neurl1a/Nr2e1/Sgk1/Rab21/Cobl/Akap5/Sema4d/Plk2/Dlg5/Csmd3/Shank3/Ache/Epha4/Mark1/Dab2ip/Grin1/Efna1/Ptprd/Elavl4/Lrp8/Ptn/Camk1/Caprin2/Cyfip1/Cdkl5/Nlgn3/Nedd4/Ptprf/Arhgap44/Dbn1/Eef2k/Lzts1/Shank2/Srcin1/Cul7/Shank1/Prex1/Sdk1/Reln/Cux2/Sipa1l1/Ntrk2/Alk/Cfl1/Camk2b/Numbl/Nlgn1	52
GO	CC	GO:0005938	cell cortex	81/2474	322/17165	2.08711e-07	2.68114e-06	ENSMUSG00000000416/ENSMUSG00000000915/ENSMUSG00000002233/ENSMUSG00000004056/ENSMUSG00000006356/ENSMUSG00000006699/ENSMUSG00000007655/ENSMUSG00000009073/ENSMUSG00000016256/ENSMUSG00000017144/ENSMUSG00000018387/ENSMUSG00000018398/ENSMUSG00000019820/ENSMUSG00000019997/ENSMUSG00000020173/ENSMUSG00000020758/ENSMUSG00000021589/ENSMUSG00000022272/ENSMUSG00000022443/ENSMUSG00000022456/ENSMUSG00000024143/…	Cttnbp2/Hip1r/Rhoc/Akt2/Crip2/Cdc42/Cav1/Nf2/Ctsz/Rnd3/Shroom1/Sept8/Utrn/Ctgf/Cobl/Itgb4/Rhobtb3/Myo10/Myh9/Sept3/Rhoq/Cdh2/Flnb/Arhgef9/Ermn/Mapre1/Tpm3/Gucy1b3/Asph/Tmod1/Cap1/Cnksr1/Rhoh/Rimbp2/Exoc4/Erc1/Arfip2/Cttn/Was/Flna/Ank1/Tpm4/Nedd4/Myo1e/Mtss1l/Ctnnd1/Pkd2/Dbn1/Tle6/Myo1d/Fermt2/Eef1a1/Lasp1/Fchsd1/Ppp1r9b/Rhou/Cdc42se1/Rhoj/Cltb/Phldb1/Pls1/Sept6/Pard3b/Rasal3/Hmcn2/Cfl1/Fry/Grm7/G…	81
GO	BP	GO:0032412	regulation of ion transmembrane transporter activity	67/2453	245/17047	7.9573e-08	2.88015e-06	ENSMUSG00000003161/ENSMUSG00000003352/ENSMUSG00000006930/ENSMUSG00000007655/ENSMUSG00000009687/ENSMUSG00000014077/ENSMUSG00000015968/ENSMUSG00000016933/ENSMUSG00000017400/ENSMUSG00000017412/ENSMUSG00000020704/ENSMUSG00000020723/ENSMUSG00000020733/ENSMUSG00000021313/ENSMUSG00000021835/ENSMUSG00000022494/ENSMUSG00000022619/ENSMUSG00000022623/ENSMUSG00000022965/ENSMUSG00000023092/ENSMUSG00000023992/…	Sri/Cacnb3/Hap1/Cav1/Fxyd5/Chp1/Cacna1d/Plcg1/Stac2/Cacnb4/Asic2/Cacng4/Slc9a3r1/Ryr2/Bmp4/Shisa9/Mapk8ip2/Shank3/Ifngr2/Fhl1/Trem2/Ehd3/Nrxn1/Gal/Jph3/Stom/Lrrc26/Kcnab1/Asph/Gem/Pde4b/Ephb2/Hpca/Slc9a1/Fam115c/Nlgn3/Nedd4/Htr3a/Plcg2/Pkd2/Cacna1a/Kcnc2/Fxyd1/Fam115a/Hk1/Shank2/Nos1ap/Ctss/Shank1/Ptpn3/Cacng5/Agrn/Reln/S100a1/Kcna1/P2ry6/Neto1/Gpd1l/Amigo1/Sepn1/Prkg1/Shisa6/Cfl1/Kcnc1/Nlgn1/Ank…	67
GO	BP	GO:0071241	cellular response to inorganic substance	61/2453	216/17047	8.63601e-08	3.10687e-06	ENSMUSG00000000263/ENSMUSG00000000753/ENSMUSG00000002633/ENSMUSG00000003545/ENSMUSG00000003849/ENSMUSG00000004952/ENSMUSG00000005413/ENSMUSG00000006764/ENSMUSG00000009292/ENSMUSG00000013275/ENSMUSG00000015340/ENSMUSG00000015839/ENSMUSG00000015950/ENSMUSG00000020122/ENSMUSG00000022212/ENSMUSG00000024109/ENSMUSG00000024112/ENSMUSG00000024261/ENSMUSG00000024743/ENSMUSG00000024778/ENSMUSG00000026031/…	Glra1/Serpinf1/Shh/Fosb/Nqo1/Rasa4/Hmox1/Tph2/Trpm2/Slc41a1/Cybb/Nfe2l2/Ncf1/Egfr/Cpne6/Nrxn1/Cacna1h/Syt4/Syt7/Fas/Cflar/Fn1/Parp1/Anxa5/Gucy1b3/Asph/Cpne3/Hpca/P2rx4/Eif2ak3/Mt3/Mt2/Mt1/Gsta4/Trf/Cpne2/Pkd2/Cpne7/Cebpa/Eef2k/Kcnc2/Syt1/Timeless/Syt15/Tspo/Spidr/Kcna1/Kcnk3/Syt12/Cpne8/Dlg2/Jun/Junb/B2m/Syt9/Mapk3/Nlgn1/Syt11/Ank3/Jund/Capn3	61
GO	BP	GO:0002274	myeloid leukocyte activation	56/2453	192/17047	8.78635e-08	3.1231e-06	ENSMUSG00000000982/ENSMUSG00000001123/ENSMUSG00000002111/ENSMUSG00000002699/ENSMUSG00000002983/ENSMUSG00000004626/ENSMUSG00000005413/ENSMUSG00000009681/ENSMUSG00000017631/ENSMUSG00000020143/ENSMUSG00000020399/ENSMUSG00000020828/ENSMUSG00000021194/ENSMUSG00000021457/ENSMUSG00000022037/ENSMUSG00000022965/ENSMUSG00000023992/ENSMUSG00000024397/ENSMUSG00000024810/ENSMUSG00000025888/ENSMUSG00000027347/…	Ccl3/Lgals9/Spi1/Lcp2/Relb/Stxbp2/Hmox1/Bcr/Abr/Dock2/Havcr2/Pld2/Chga/Syk/Clu/Ifngr2/Trem2/Aif1/Il33/Casp1/Rasgrp1/Tlr2/Edn2/Fgr/Rhoh/Ltbr/Ctsc/Tyrobp/Il4ra/Cd37/Tlr3/Cx3cl1/Plscr1/Tgfbr2/Rac2/Grn/Cebpa/Sbno2/Tnfsf9/C1qa/Cd84/Tlr4/Thbs1/Lyn/Tlr7/Prkce/C5ar1/Cx3cr1/Jun/Fam19a3/Fcer1g/Fcgr4/Tnip2/Pvrl2/Hmgb1/Cst7	56
GO	BP	GO:0043542	endothelial cell migration	56/2453	192/17047	8.78635e-08	3.1231e-06	ENSMUSG00000000290/ENSMUSG00000000392/ENSMUSG00000000753/ENSMUSG00000002633/ENSMUSG00000002985/ENSMUSG00000005413/ENSMUSG00000006445/ENSMUSG00000009376/ENSMUSG00000013076/ENSMUSG00000015305/ENSMUSG00000015839/ENSMUSG00000016128/ENSMUSG00000016933/ENSMUSG00000019803/ENSMUSG00000020580/ENSMUSG00000021701/ENSMUSG00000021835/ENSMUSG00000022443/ENSMUSG00000022475/ENSMUSG00000022883/ENSMUSG00000023886/…	Itgb2/Fap/Serpinf1/Shh/Apoe/Hmox1/Epha2/Met/Amotl1/Sash1/Nfe2l2/Stard13/Plcg1/Nr2e1/Rock2/Plk2/Bmp4/Myh9/Hdac7/Robo1/Smoc2/Vegfa/Cyp1b1/Anxa1/Nrp1/Sp100/Dab2ip/Notch1/Itgav/Spred1/Rab13/Efna1/Fbxw7/P2rx4/Ptn/Plxnd1/Nr2f2/Gpr124/Slit2/Fgfr1/Cdh13/Agt/Ets1/Card10/Ptprm/Bai1/Prkx/Fgf2/Thbs1/Amot/Rhoj/Igf2/Ptp4a3/Kdr/Gpx1/Hmgb1	56
GO	MF	GO:0004714	transmembrane receptor protein tyrosine kinase activity	26/2478	57/17092	1.71222e-08	3.28742e-06	ENSMUSG00000002602/ENSMUSG00000003534/ENSMUSG00000005320/ENSMUSG00000005958/ENSMUSG00000006445/ENSMUSG00000009376/ENSMUSG00000014361/ENSMUSG00000020122/ENSMUSG00000020467/ENSMUSG00000021464/ENSMUSG00000024621/ENSMUSG00000025810/ENSMUSG00000025969/ENSMUSG00000026235/ENSMUSG00000028072/ENSMUSG00000028289/ENSMUSG00000028664/ENSMUSG00000028876/ENSMUSG00000029245/ENSMUSG00000029648/ENSMUSG00000031565/…	Axl/Ddr1/Fgfr4/Ephb3/Epha2/Met/Mertk/Egfr/Efemp1/Ror2/Csf1r/Nrp1/Nrp2/Epha4/Ntrk1/Epha7/Ephb2/Epha10/Epha5/Flt1/Fgfr1/Flt3/Ntrk2/Alk/Erbb2/Kdr	26
GO	MF	GO:0008201	heparin binding	46/2478	138/17092	1.8608e-08	3.28742e-06	ENSMUSG00000002985/ENSMUSG00000005320/ENSMUSG00000006651/ENSMUSG00000006958/ENSMUSG00000019997/ENSMUSG00000021702/ENSMUSG00000021835/ENSMUSG00000022893/ENSMUSG00000022894/ENSMUSG00000023886/ENSMUSG00000023951/ENSMUSG00000024486/ENSMUSG00000025810/ENSMUSG00000025969/ENSMUSG00000026193/ENSMUSG00000026249/ENSMUSG00000026365/ENSMUSG00000026395/ENSMUSG00000026837/ENSMUSG00000027712/ENSMUSG00000027966/…	Apoe/Fgfr4/Aplp1/Chrd/Ctgf/Thbs4/Bmp4/Adamts1/Adamts5/Smoc2/Vegfa/Hbegf/Nrp1/Nrp2/Fn1/Serpine2/Cfh/Ptprc/Col5a1/Anxa5/Col11a1/Cyr61/Lrpap1/Tgfbr3/Pcolce/Ptn/Anxa4/Slit2/Fgfr1/Ptprf/Tnxb/Cxcl10/Impg2/Fgf2/Eva1c/Thbs1/Prelp/Adamtsl5/Rtn4rl1/Lrtm1/Ndnf/Grem2/Nav2/Col25a1/Col23a1/Hmgb1	46
GO	BP	GO:0035924	cellular response to vascular endothelial growth factor stimulus	24/2453	54/17047	9.67414e-08	3.41257e-06	ENSMUSG00000004791/ENSMUSG00000014773/ENSMUSG00000016528/ENSMUSG00000017774/ENSMUSG00000019647/ENSMUSG00000022883/ENSMUSG00000023886/ENSMUSG00000023951/ENSMUSG00000024659/ENSMUSG00000024927/ENSMUSG00000025351/ENSMUSG00000025810/ENSMUSG00000025969/ENSMUSG00000026883/ENSMUSG00000026923/ENSMUSG00000027962/ENSMUSG00000029648/ENSMUSG00000031486/ENSMUSG00000031714/ENSMUSG00000052957/ENSMUSG00000053477/…	Pgf/Dll1/Mapkapk2/Myo1c/Sema6a/Robo1/Smoc2/Vegfa/Anxa1/Rela/Cd63/Nrp1/Nrp2/Dab2ip/Notch1/Vcam1/Flt1/Gpr124/Gab1/Gas1/Tcf4/Cadm4/Ptp4a3/Kdr	24
GO	BP	GO:0099175	regulation of postsynapse organization	40/2453	119/17047	9.71571e-08	3.41257e-06	ENSMUSG00000002489/ENSMUSG00000002985/ENSMUSG00000019843/ENSMUSG00000020598/ENSMUSG00000021877/ENSMUSG00000022623/ENSMUSG00000024109/ENSMUSG00000024304/ENSMUSG00000025656/ENSMUSG00000025969/ENSMUSG00000026235/ENSMUSG00000026959/ENSMUSG00000027954/ENSMUSG00000028289/ENSMUSG00000028399/ENSMUSG00000028613/ENSMUSG00000029838/ENSMUSG00000030098/ENSMUSG00000030309/ENSMUSG00000031292/ENSMUSG00000031302/…	Tiam1/Apoe/Fyn/Nrcam/Arf4/Shank3/Nrxn1/Cdh2/Arhgef9/Nrp2/Epha4/Grin1/Efna1/Epha7/Ptprd/Lrp8/Ptn/Grip2/Caprin2/Cdkl5/Nlgn3/Sorbs2/Ptprf/Arhgap44/Dbn1/Eef2k/Tanc1/Srcin1/Reln/Cux2/Sipa1l1/Lrrc4b/Shisa6/Cfl1/Camk2b/Lrrtm1/Nlgn1/Zfp804a/Grid2/Lrrtm2	40
GO	MF	GO:0043236	laminin binding	17/2478	28/17092	2.27207e-08	3.44056e-06	ENSMUSG00000001507/ENSMUSG00000002633/ENSMUSG00000015533/ENSMUSG00000020019/ENSMUSG00000021702/ENSMUSG00000023328/ENSMUSG00000031558/ENSMUSG00000034220/ENSMUSG00000035279/ENSMUSG00000038642/ENSMUSG00000039115/ENSMUSG00000039116/ENSMUSG00000039952/ENSMUSG00000040152/ENSMUSG00000041936/ENSMUSG00000050335/ENSMUSG00000068220	Itga3/Shh/Itga2/Ntn4/Thbs4/Ache/Slit2/Gpc1/Ssc5d/Ctss/Itga9/Gpr126/Dag1/Thbs1/Agrn/Lgals3/Lgals1	17
GO	BP	GO:0008347	glial cell migration	25/2453	58/17047	1.09875e-07	3.83658e-06	ENSMUSG00000000957/ENSMUSG00000000982/ENSMUSG00000002489/ENSMUSG00000014599/ENSMUSG00000019803/ENSMUSG00000020467/ENSMUSG00000021318/ENSMUSG00000021665/ENSMUSG00000023992/ENSMUSG00000024778/ENSMUSG00000026193/ENSMUSG00000026235/ENSMUSG00000026883/ENSMUSG00000026959/ENSMUSG00000028519/ENSMUSG00000028613/ENSMUSG00000029470/ENSMUSG00000035352/ENSMUSG00000036353/ENSMUSG00000039239/ENSMUSG00000040249/…	Mmp14/Ccl3/Tiam1/Csf1/Nr2e1/Efemp1/Gli3/Hexb/Trem2/Fas/Fn1/Epha4/Dab2ip/Grin1/Dab1/Lrp8/P2rx4/Ccl12/P2ry12/Tgfb2/Lrp1/Tspo/Reln/2900011O08Rik/Apcdd1	25
GO	BP	GO:0060401	cytosolic calcium ion transport	53/2453	179/17047	1.12572e-07	3.90775e-06	ENSMUSG00000000409/ENSMUSG00000000982/ENSMUSG00000002083/ENSMUSG00000003161/ENSMUSG00000003352/ENSMUSG00000004266/ENSMUSG00000006519/ENSMUSG00000006930/ENSMUSG00000007655/ENSMUSG00000009292/ENSMUSG00000016933/ENSMUSG00000019843/ENSMUSG00000019997/ENSMUSG00000020866/ENSMUSG00000021057/ENSMUSG00000021313/ENSMUSG00000021478/ENSMUSG00000021835/ENSMUSG00000021973/ENSMUSG00000022208/ENSMUSG00000024527/…	Lck/Ccl3/Bbc3/Sri/Cacnb3/Ptpn6/Cyba/Hap1/Cav1/Trpm2/Plcg1/Fyn/Ctgf/Cacna1g/Akap5/Ryr2/Drd1a/Bmp4/Micu2/Jph4/Afg3l2/Plce1/Jph3/Dbi/Ptprc/Grin1/Itgav/Asph/P2rx7/P2rx4/Itpr1/Trpm1/Rasa3/Cx3cl1/Ubash3b/Slc8b1/Plcg2/Pkd2/Cxcl10/Pawr/Fgf2/Tgfb2/Lyn/Jph1/Prkce/P2ry6/Sepn1/Cacna1c/Slc8a1/Tmem28/Capn3/Fam155a/Ccr5	53
GO	BP	GO:0071526	semaphorin-plexin signaling pathway	19/2453	37/17047	1.22241e-07	4.21872e-06	ENSMUSG00000000627/ENSMUSG00000001227/ENSMUSG00000001847/ENSMUSG00000009376/ENSMUSG00000019647/ENSMUSG00000021451/ENSMUSG00000025132/ENSMUSG00000025207/ENSMUSG00000025810/ENSMUSG00000025969/ENSMUSG00000026640/ENSMUSG00000028780/ENSMUSG00000029765/ENSMUSG00000030084/ENSMUSG00000030123/ENSMUSG00000031328/ENSMUSG00000031398/ENSMUSG00000036606/ENSMUSG00000063531	Sema4f/Sema6b/Rac1/Met/Sema6a/Sema4d/Arhgdia/Sema4g/Nrp1/Nrp2/Plxna2/Sema3c/Plxna4/Plxna1/Plxnd1/Flna/Plxna3/Plxnb2/Sema3e	19
GO	CC	GO:0032432	actin filament bundle	32/2474	89/17165	3.35976e-07	4.23456e-06	ENSMUSG00000005057/ENSMUSG00000006219/ENSMUSG00000006519/ENSMUSG00000016382/ENSMUSG00000020388/ENSMUSG00000021998/ENSMUSG00000022443/ENSMUSG00000023348/ENSMUSG00000025278/ENSMUSG00000026556/ENSMUSG00000027940/ENSMUSG00000029581/ENSMUSG00000029860/ENSMUSG00000030739/ENSMUSG00000030847/ENSMUSG00000031328/ENSMUSG00000031605/ENSMUSG00000031636/ENSMUSG00000031799/ENSMUSG00000034201/ENSMUSG00000036718/…	Sh2b2/Fblim1/Cyba/Pls3/Pdlim4/Lcp1/Myh9/Trip6/Flnb/Vangl2/Tpm3/Fscn1/Zyx/Myh14/Bag3/Flna/Klhl2/Pdlim3/Tpm4/Gas2l1/Micall2/Fermt2/Limch1/Fam101a/Amot/Synpo/Pls1/Cfl1/Sept11/Palld/Sept9/Marcks	32
GO	BP	GO:0002009	morphogenesis of an epithelium	112/2453	484/17047	1.24504e-07	4.272e-06	ENSMUSG00000000247/ENSMUSG00000000378/ENSMUSG00000000567/ENSMUSG00000000881/ENSMUSG00000000957/ENSMUSG00000001288/ENSMUSG00000001521/ENSMUSG00000001761/ENSMUSG00000001847/ENSMUSG00000002233/ENSMUSG00000002633/ENSMUSG00000002799/ENSMUSG00000003534/ENSMUSG00000004791/ENSMUSG00000005087/ENSMUSG00000006445/ENSMUSG00000006699/ENSMUSG00000007989/ENSMUSG00000009376/ENSMUSG00000014599/ENSMUSG00000014773/…	Lhx2/Ccm2/Sox9/Dlg3/Mmp14/Rarg/Tulp3/Smo/Rac1/Rhoc/Shh/Jag2/Ddr1/Pgf/Cd44/Epha2/Cdc42/Fzd3/Met/Csf1/Dll1/Lama5/Stard13/Ctsz/Sulf1/Etv4/Apaf1/Ntn4/Egfr/Lgr5/Cobl/Slc9a3r1/Mthfd1/Ryr2/Gli3/Ror2/Dlg5/Bmp4/Ajuba/Shank3/Vegfa/Sox8/Hbegf/Lrp5/Cd151/Nrp1/Rdh10/Casp8/Epha4/Vangl2/Acvr1/Col5a1/Zeb2/Notch1/Nckap1/Frzb/Spint1/Src/Cyr61/Lmo4/Epha7/Pdpn/Tfap2c/Sema3c/Areg/Plxna1/Plxnd1/Vasp/Itgax/Tead2/Msn/Op…	112
GO	BP	GO:0030100	regulation of endocytosis	73/2453	278/17047	1.27261e-07	4.3415e-06	ENSMUSG00000000915/ENSMUSG00000002602/ENSMUSG00000002985/ENSMUSG00000003283/ENSMUSG00000004815/ENSMUSG00000006519/ENSMUSG00000006930/ENSMUSG00000007655/ENSMUSG00000009681/ENSMUSG00000013921/ENSMUSG00000014361/ENSMUSG00000014773/ENSMUSG00000015533/ENSMUSG00000015947/ENSMUSG00000017631/ENSMUSG00000018909/ENSMUSG00000020132/ENSMUSG00000020143/ENSMUSG00000020828/ENSMUSG00000021057/ENSMUSG00000021457/…	Hip1r/Axl/Apoe/Hck/Dgkq/Cyba/Hap1/Cav1/Bcr/Clip3/Mertk/Dll1/Itga2/Fcgr1/Abr/Arrb1/Rab21/Dock2/Pld2/Akap5/Syk/Clu/Nckap1l/Pros1/Il15ra/Vegfa/Trem2/C3/Syt4/Syt7/Cd63/Cd151/Ptprc/Vamp4/Itgav/Ptpn1/Src/Tmem55a/Sdcbp/Hpca/Fgr/Lrpap1/Cd22/Ophn1/Necab2/Cdh13/Rab27a/Nedd4/Trf/Snx33/Plcg2/Pip5k1c/Eef2k/Picalm/Magi2/Lrp1/Apoc1/Rap1gap/Ankrd13a/Lgals3/Cd14/Cd47/Gpc3/Rit2/Prtn3/Fcer1g/Flot1/Lrrtm1/B2m/Nlgn1/…	73
GO	BP	GO:0032409	regulation of transporter activity	70/2453	263/17047	1.30629e-07	4.43092e-06	ENSMUSG00000002588/ENSMUSG00000003161/ENSMUSG00000003352/ENSMUSG00000006930/ENSMUSG00000007021/ENSMUSG00000007655/ENSMUSG00000009687/ENSMUSG00000014077/ENSMUSG00000015968/ENSMUSG00000016933/ENSMUSG00000017400/ENSMUSG00000017412/ENSMUSG00000020704/ENSMUSG00000020723/ENSMUSG00000020733/ENSMUSG00000021313/ENSMUSG00000021835/ENSMUSG00000022494/ENSMUSG00000022619/ENSMUSG00000022623/ENSMUSG00000022965/…	Pon1/Sri/Cacnb3/Hap1/Syngr3/Cav1/Fxyd5/Chp1/Cacna1d/Plcg1/Stac2/Cacnb4/Asic2/Cacng4/Slc9a3r1/Ryr2/Bmp4/Shisa9/Mapk8ip2/Shank3/Ifngr2/Fhl1/Trem2/Ehd3/Nrxn1/Gal/Jph3/Stom/Lrrc26/Kcnab1/Asph/Gem/Pde4b/Ephb2/Hpca/Slc9a1/Fam115c/Nlgn3/Nedd4/Htr3a/Plcg2/Pkd2/Cacna1a/Kcnc2/Fxyd1/Fam115a/Hk1/Shank2/Nos1ap/Ctss/Shank1/Ptpn3/Cacng5/Agrn/Reln/S100a1/Kcna1/P2ry6/Neto1/Gpd1l/Amigo1/Sepn1/Prkg1/Shisa6/Cfl1/Kcn…	70
GO	BP	GO:2001259	positive regulation of cation channel activity	29/2453	74/17047	1.35524e-07	4.57084e-06	ENSMUSG00000003352/ENSMUSG00000006930/ENSMUSG00000017400/ENSMUSG00000017412/ENSMUSG00000020704/ENSMUSG00000020723/ENSMUSG00000021835/ENSMUSG00000022623/ENSMUSG00000022965/ENSMUSG00000023992/ENSMUSG00000024065/ENSMUSG00000024907/ENSMUSG00000026961/ENSMUSG00000028207/ENSMUSG00000028664/ENSMUSG00000031302/ENSMUSG00000034330/ENSMUSG00000034462/ENSMUSG00000035681/ENSMUSG00000038642/ENSMUSG00000042453/…	Cacnb3/Hap1/Stac2/Cacnb4/Asic2/Cacng4/Bmp4/Shank3/Ifngr2/Trem2/Ehd3/Gal/Lrrc26/Asph/Ephb2/Nlgn3/Plcg2/Pkd2/Kcnc2/Ctss/Reln/S100a1/Kcna1/P2ry6/Amigo1/Prkg1/Cfl1/Kcnc1/Ank3	29
GO	CC	GO:0043198	dendritic shaft	26/2474	65/17165	3.83384e-07	4.7426e-06	ENSMUSG00000000632/ENSMUSG00000000881/ENSMUSG00000001986/ENSMUSG00000004113/ENSMUSG00000017314/ENSMUSG00000020524/ENSMUSG00000021057/ENSMUSG00000021478/ENSMUSG00000022208/ENSMUSG00000023017/ENSMUSG00000026235/ENSMUSG00000027254/ENSMUSG00000028059/ENSMUSG00000029763/ENSMUSG00000030098/ENSMUSG00000031328/ENSMUSG00000032036/ENSMUSG00000034675/ENSMUSG00000036306/ENSMUSG00000039621/ENSMUSG00000042249/…	Sez6/Dlg3/Gria3/Cacna1b/Mpp2/Gria1/Akap5/Drd1a/Jph4/Asic1/Epha4/Map1a/Arhgef2/Exoc4/Grip2/Flna/Kirrel3/Dbn1/Lzts1/Prex1/Adrbk2/Cacna1c/Slc8a1/Grm7/Nlgn1/Zfp804a	26
GO	BP	GO:0060402	calcium ion transport into cytosol	50/2453	166/17047	1.41459e-07	4.74407e-06	ENSMUSG00000000409/ENSMUSG00000000982/ENSMUSG00000002083/ENSMUSG00000003161/ENSMUSG00000003352/ENSMUSG00000004266/ENSMUSG00000006519/ENSMUSG00000006930/ENSMUSG00000007655/ENSMUSG00000009292/ENSMUSG00000016933/ENSMUSG00000019843/ENSMUSG00000020866/ENSMUSG00000021057/ENSMUSG00000021313/ENSMUSG00000021478/ENSMUSG00000021835/ENSMUSG00000022208/ENSMUSG00000024998/ENSMUSG00000025318/ENSMUSG00000026385/…	Lck/Ccl3/Bbc3/Sri/Cacnb3/Ptpn6/Cyba/Hap1/Cav1/Trpm2/Plcg1/Fyn/Cacna1g/Akap5/Ryr2/Drd1a/Bmp4/Jph4/Plce1/Jph3/Dbi/Ptprc/Grin1/Itgav/Asph/P2rx7/P2rx4/Itpr1/Trpm1/Rasa3/Cx3cl1/Ubash3b/Slc8b1/Plcg2/Pkd2/Cxcl10/Pawr/Fgf2/Tgfb2/Lyn/Jph1/Prkce/P2ry6/Sepn1/Cacna1c/Slc8a1/Tmem28/Capn3/Fam155a/Ccr5	50
GO	BP	GO:0001906	cell killing	45/2453	143/17047	1.44781e-07	4.81326e-06	ENSMUSG00000001123/ENSMUSG00000004266/ENSMUSG00000004626/ENSMUSG00000015947/ENSMUSG00000015950/ENSMUSG00000016206/ENSMUSG00000016481/ENSMUSG00000019998/ENSMUSG00000020399/ENSMUSG00000020919/ENSMUSG00000021457/ENSMUSG00000022378/ENSMUSG00000024164/ENSMUSG00000024339/ENSMUSG00000026365/ENSMUSG00000026395/ENSMUSG00000027347/ENSMUSG00000027718/ENSMUSG00000028691/ENSMUSG00000028793/ENSMUSG00000029468/…	Lgals9/Ptpn6/Stxbp2/Fcgr1/Ncf1/H2-M3/Cr1l/Stx7/Havcr2/Stat5b/Syk/Fam49b/C3/Tap2/Cfh/Ptprc/Rasgrp1/Il21/Prdx1/Rnf19b/P2rx7/Lag3/Clec2d/Ctsc/Tyrobp/Rab27a/Ctsh/Cd59a/Vav1/H2-Q4/Tap1/Pvr/Mill2/Igf2/H2-T22/H2-Q7/B2m/H2-K1/Pvrl2/H2-T23/Cd59b/H2-Q6/H2-D1/H60b/Ccr5	45
GO	BP	GO:0043583	ear development	60/2453	214/17047	1.45144e-07	4.81326e-06	ENSMUSG00000000378/ENSMUSG00000000567/ENSMUSG00000001847/ENSMUSG00000002633/ENSMUSG00000002731/ENSMUSG00000002799/ENSMUSG00000003534/ENSMUSG00000004207/ENSMUSG00000007653/ENSMUSG00000007989/ENSMUSG00000009681/ENSMUSG00000014773/ENSMUSG00000016528/ENSMUSG00000017631/ENSMUSG00000019789/ENSMUSG00000019906/ENSMUSG00000020105/ENSMUSG00000020140/ENSMUSG00000020733/ENSMUSG00000021318/ENSMUSG00000021464/…	Ccm2/Sox9/Rac1/Shh/Prkra/Jag2/Ddr1/Psap/Gabrb2/Fzd3/Bcr/Dll1/Mapkapk2/Abr/Hey2/Lin7a/Lrig3/Lgr5/Slc9a3r1/Gli3/Ror2/Cxcl14/Bmp4/Lrp10/Col2a1/Rdh10/Vangl2/Notch1/Lhx3/Frzb/Col11a1/Kcnq4/Mycl/Ephb2/Hpca/Dfna5/Lrig1/Atp2b2/Fgfr1/Stra6/Triobp/Gabrb3/Neurod1/Cebpa/Dchs1/C1qb/Sobp/Tgfb2/Atp8b1/Clrn1/D3Bwg0562e/Kcnk3/Tifab/Gas1/H2-K1/Mapk3/H2-T23/Cebpd/Ifi204/Sox2	60
GO	BP	GO:0007215	glutamate receptor signaling pathway	35/2453	99/17047	1.48919e-07	4.91102e-06	ENSMUSG00000000617/ENSMUSG00000001985/ENSMUSG00000001986/ENSMUSG00000002489/ENSMUSG00000003378/ENSMUSG00000010825/ENSMUSG00000019843/ENSMUSG00000020524/ENSMUSG00000020723/ENSMUSG00000022494/ENSMUSG00000022619/ENSMUSG00000022623/ENSMUSG00000022935/ENSMUSG00000022965/ENSMUSG00000024109/ENSMUSG00000025813/ENSMUSG00000025892/ENSMUSG00000026959/ENSMUSG00000028664/ENSMUSG00000030523/ENSMUSG00000031302/…	Grm6/Grik3/Gria3/Tiam1/Grik5/Grid2ip/Fyn/Gria1/Cacng4/Shisa9/Mapk8ip2/Shank3/Grik1/Ifngr2/Nrxn1/Homer2/Gria4/Grin1/Ephb2/Trpm1/Nlgn3/Cx3cl1/Necab2/Gria2/Shank2/Shank1/Cacng5/Reln/Neto1/Shisa6/Grik2/Cfl1/Grm7/Nlgn1/Grid2	35
GO	BP	GO:0051402	neuron apoptotic process	72/2453	274/17047	1.50314e-07	4.92963e-06	ENSMUSG00000000120/ENSMUSG00000000982/ENSMUSG00000001761/ENSMUSG00000002083/ENSMUSG00000002602/ENSMUSG00000002985/ENSMUSG00000003378/ENSMUSG00000003849/ENSMUSG00000004056/ENSMUSG00000004263/ENSMUSG00000004891/ENSMUSG00000005413/ENSMUSG00000005656/ENSMUSG00000006699/ENSMUSG00000007653/ENSMUSG00000016256/ENSMUSG00000018909/ENSMUSG00000019843/ENSMUSG00000019979/ENSMUSG00000019982/ENSMUSG00000020262/…	Ngfr/Ccl3/Smo/Bbc3/Axl/Apoe/Grik5/Nqo1/Akt2/Atn1/Nes/Hmox1/Snx6/Cdc42/Gabrb2/Ctsz/Arrb1/Fyn/Apaf1/Myb/Adarb1/Faim2/Tnfrsf21/Fas/Nrp1/Ncf2/Parp1/Nr4a2/Grin1/Ntrk1/Fbxw7/Gclm/Epha7/Hdac1/Chl1/Tnfrsf1a/Tyrobp/Nupr1/Casp3/Mt3/Mt1/Cx3cl1/Aars/Ptprf/Gabrb3/Cacna1a/Grn/Sncb/Ccl12/Pawr/Mcl1/En2/Tgfb2/Wfs1/Lrp1/Clcf1/Kif14/Agrn/Isl1/Amigo2/Ndnf/C5ar1/Cited1/Cx3cr1/Jun/Ntrk2/Grik2/Cebpb/Grm7/Grid2/Nrbp2/Pc…	72
GO	BP	GO:0030900	forebrain development	95/2453	394/17047	1.53652e-07	5.01143e-06	ENSMUSG00000000247/ENSMUSG00000001761/ENSMUSG00000001847/ENSMUSG00000002602/ENSMUSG00000002633/ENSMUSG00000005045/ENSMUSG00000005958/ENSMUSG00000006782/ENSMUSG00000006930/ENSMUSG00000006958/ENSMUSG00000008575/ENSMUSG00000009073/ENSMUSG00000015829/ENSMUSG00000017491/ENSMUSG00000019803/ENSMUSG00000019843/ENSMUSG00000019979/ENSMUSG00000020122/ENSMUSG00000021068/ENSMUSG00000021318/ENSMUSG00000021478/…	Lhx2/Smo/Rac1/Axl/Shh/Chd5/Ephb3/Cnp/Hap1/Chrd/Nfib/Nf2/Tnr/Rarb/Nr2e1/Fyn/Apaf1/Egfr/Nin/Gli3/Drd1a/Agtpbp1/Bmp4/Slc38a2/Shank3/Robo1/Cdh2/Csf1r/Nrp1/Nrp2/Atic/Dbi/Atp2b4/Nr4a2/Zeb2/Dab2ip/Slc4a10/Notch1/Lhx3/Grin1/Pax6/Src/Dclk2/Tal2/Dab1/Lrp8/Tfap2c/Ephb2/Hdac1/Epha5/Foxp2/Plxna4/Ptn/Nr2f2/Tyrobp/Ophn1/Flna/Plxna3/Slit2/Fgfr1/Casp3/Gnao1/Ets1/Kirrel3/Fez1/Neurod1/Myo1d/Kcnc2/P2ry12/Gng12/Fgf2/…	95
GO	BP	GO:0034330	cell junction organization	66/2453	244/17047	1.54893e-07	5.02428e-06	ENSMUSG00000000378/ENSMUSG00000000957/ENSMUSG00000001672/ENSMUSG00000001847/ENSMUSG00000002233/ENSMUSG00000006445/ENSMUSG00000006699/ENSMUSG00000007655/ENSMUSG00000009073/ENSMUSG00000009681/ENSMUSG00000015533/ENSMUSG00000017167/ENSMUSG00000017774/ENSMUSG00000020580/ENSMUSG00000020758/ENSMUSG00000021782/ENSMUSG00000022178/ENSMUSG00000022425/ENSMUSG00000022475/ENSMUSG00000023951/ENSMUSG00000024044/…	Ccm2/Mmp14/Marveld3/Rac1/Rhoc/Epha2/Cdc42/Cav1/Nf2/Bcr/Itga2/Cntnap1/Myo1c/Rock2/Itgb4/Dlg5/Ajuba/Enpp2/Hdac7/Vegfa/Epb4.1l3/Cdh2/Csf1r/Col17a1/Ptprj/Nrp1/Fn1/Cdh7/Itgav/Src/Rab13/Fscn1/Ptpro/Cd9/Cttn/Ophn1/Flna/Gpm6b/Arhgap6/Cdh11/Cdh13/Agt/Pvrl1/Smad3/Ctnnd1/Gjc1/Cdh8/Micall2/Rab8b/Fermt2/Limch1/Tgfb2/Lrp1/S100a10/Crb3/Nr1h4/Cdh20/Dsp/Cfl1/Prtn3/Cdh24/Flot1/Cdh3/Kdr/Numbl/Zfp703	66
GO	BP	GO:0010977	negative regulation of neuron projection development	49/2453	162/17047	1.62938e-07	5.25652e-06	ENSMUSG00000000627/ENSMUSG00000000861/ENSMUSG00000001227/ENSMUSG00000002985/ENSMUSG00000015829/ENSMUSG00000016256/ENSMUSG00000019647/ENSMUSG00000020393/ENSMUSG00000020467/ENSMUSG00000020932/ENSMUSG00000021451/ENSMUSG00000021701/ENSMUSG00000021745/ENSMUSG00000023206/ENSMUSG00000025207/ENSMUSG00000025810/ENSMUSG00000026074/ENSMUSG00000026223/ENSMUSG00000026235/ENSMUSG00000026433/ENSMUSG00000027954/…	Sema4f/Bcl11a/Sema6b/Apoe/Tnr/Ctsz/Sema6a/Kremen1/Efemp1/Gfap/Sema4d/Plk2/Ptprg/Il15ra/Sema4g/Nrp1/Map4k4/Itm2c/Epha4/Rab29/Efna1/Epha7/Dab1/Ephb2/Sema3c/Cd38/Nlgn3/Flna/Plxna3/Slit2/Mt3/Inppl1/Zfp365/Lrp1/Inpp5f/Trim46/Rtn4rl1/D8Ertd82e/Rtn4rl2/Rit2/B2m/H2-K1/Sema3e/Nlgn1/Lgals1/Nr2f1/Rgma/H2-D1/Ccr5	49
GO	BP	GO:0071222	cellular response to lipopolysaccharide	53/2453	181/17047	1.67598e-07	5.37762e-06	ENSMUSG00000000982/ENSMUSG00000002602/ENSMUSG00000009681/ENSMUSG00000015243/ENSMUSG00000015305/ENSMUSG00000016496/ENSMUSG00000018774/ENSMUSG00000020399/ENSMUSG00000020638/ENSMUSG00000021423/ENSMUSG00000021624/ENSMUSG00000022500/ENSMUSG00000022901/ENSMUSG00000023992/ENSMUSG00000024927/ENSMUSG00000025779/ENSMUSG00000025888/ENSMUSG00000026509/ENSMUSG00000026712/ENSMUSG00000026822/ENSMUSG00000026883/…	Ccl3/Axl/Bcr/Abca1/Sash1/Cd274/Cd68/Havcr2/Cmpk2/Ly86/Cd180/Litaf/Cd86/Trem2/Rela/Ly96/Casp1/Capn2/Mrc1/Lcn2/Dab2ip/Src/Nfkb1/Gbp2/Pde4b/Tnfrsf1b/Irak1/Cx3cl1/Plscr1/Plscr2/Trib1/Myd88/Cxcl10/Ccl12/Sbno2/Arid5a/Tlr4/Irf8/Tspo/Lyn/Zfp36/Prkce/Nr1h4/Cd14/Cx3cr1/Cebpb/Fcgr4/Tnip2/Irak2/Mapk3/Hmgb1/Irgm2/Ccr5	53
GO	BP	GO:0042391	regulation of membrane potential	101/2453	427/17047	1.70257e-07	5.43358e-06	ENSMUSG00000000263/ENSMUSG00000000632/ENSMUSG00000001985/ENSMUSG00000001986/ENSMUSG00000003352/ENSMUSG00000003378/ENSMUSG00000004056/ENSMUSG00000007041/ENSMUSG00000007653/ENSMUSG00000007655/ENSMUSG00000010803/ENSMUSG00000015968/ENSMUSG00000017167/ENSMUSG00000017314/ENSMUSG00000017412/ENSMUSG00000019848/ENSMUSG00000020436/ENSMUSG00000020524/ENSMUSG00000020598/ENSMUSG00000020704/ENSMUSG00000020866/…	Glra1/Sez6/Grik3/Gria3/Cacnb3/Grik5/Akt2/Clic1/Gabrb2/Cav1/Gabra1/Cacna1d/Cntnap1/Mpp2/Cacnb4/Popdc3/Gabrg2/Gria1/Nrcam/Asic2/Cacna1g/Ryr2/Drd1a/Mapk8ip2/Shank3/Igsf11/Asic1/Npff/Fhl1/Trem2/Ehd3/Nrxn1/Cacna1h/Celf4/Casp1/Gria4/Parp1/Grin1/Src/Gclm/Slc9a1/P2rx7/P2rx4/Ptn/Grip2/Myh14/Ano1/Nlgn3/Flna/Cx3cl1/Nedd4/Slc8b1/Chrm1/Atp1a1/Gabrb3/Kcnk1/Igsf9b/Kcnh5/Cacna1a/Dbn1/Scn7a/Chrnb4/Kcnc2/Pawr/Fxyd…	101
GO	BP	GO:0071219	cellular response to molecule of bacterial origin	54/2453	186/17047	1.75207e-07	5.56164e-06	ENSMUSG00000000982/ENSMUSG00000002602/ENSMUSG00000009681/ENSMUSG00000015243/ENSMUSG00000015305/ENSMUSG00000016496/ENSMUSG00000018774/ENSMUSG00000020399/ENSMUSG00000020638/ENSMUSG00000021423/ENSMUSG00000021624/ENSMUSG00000022500/ENSMUSG00000022901/ENSMUSG00000023992/ENSMUSG00000024927/ENSMUSG00000025779/ENSMUSG00000025888/ENSMUSG00000026509/ENSMUSG00000026712/ENSMUSG00000026822/ENSMUSG00000026883/…	Ccl3/Axl/Bcr/Abca1/Sash1/Cd274/Cd68/Havcr2/Cmpk2/Ly86/Cd180/Litaf/Cd86/Trem2/Rela/Ly96/Casp1/Capn2/Mrc1/Lcn2/Dab2ip/Src/Tlr2/Nfkb1/Gbp2/Pde4b/Tnfrsf1b/Irak1/Cx3cl1/Plscr1/Plscr2/Trib1/Myd88/Cxcl10/Ccl12/Sbno2/Arid5a/Tlr4/Irf8/Tspo/Lyn/Zfp36/Prkce/Nr1h4/Cd14/Cx3cr1/Cebpb/Fcgr4/Tnip2/Irak2/Mapk3/Hmgb1/Irgm2/Ccr5	54
GO	CC	GO:0098878	neurotransmitter receptor complex	23/2474	54/17165	4.71206e-07	5.72301e-06	ENSMUSG00000000881/ENSMUSG00000001985/ENSMUSG00000001986/ENSMUSG00000003378/ENSMUSG00000007783/ENSMUSG00000020524/ENSMUSG00000020723/ENSMUSG00000022494/ENSMUSG00000022623/ENSMUSG00000025892/ENSMUSG00000026833/ENSMUSG00000026959/ENSMUSG00000032172/ENSMUSG00000032269/ENSMUSG00000037541/ENSMUSG00000038738/ENSMUSG00000040373/ENSMUSG00000042388/ENSMUSG00000052572/ENSMUSG00000053930/ENSMUSG00000056073/…	Dlg3/Grik3/Gria3/Grik5/Cpt1c/Gria1/Cacng4/Shisa9/Shank3/Gria4/Olfm1/Grin1/Olfm2/Htr3a/Shank2/Shank1/Cacng5/Dlgap3/Dlg2/Shisa6/Grik2/Nlgn1/Grid2	23
GO	BP	GO:0030336	negative regulation of cell migration	67/2453	250/17047	1.82448e-07	5.73701e-06	ENSMUSG00000000562/ENSMUSG00000000753/ENSMUSG00000001131/ENSMUSG00000001672/ENSMUSG00000002633/ENSMUSG00000002985/ENSMUSG00000004040/ENSMUSG00000006958/ENSMUSG00000009681/ENSMUSG00000015839/ENSMUSG00000016128/ENSMUSG00000016918/ENSMUSG00000017631/ENSMUSG00000020262/ENSMUSG00000020733/ENSMUSG00000020810/ENSMUSG00000021262/ENSMUSG00000021478/ENSMUSG00000021745/ENSMUSG00000021782/ENSMUSG00000022883/…	Adora3/Serpinf1/Timp1/Marveld3/Shh/Apoe/Stat3/Chrd/Bcr/Nfe2l2/Stard13/Sulf1/Abr/Adarb1/Slc9a3r1/Cygb/Evl/Drd1a/Ptprg/Dlg5/Robo1/Cyp1b1/Aif1/Ldlrad4/Fas/Il33/Arhgdia/Ptprj/Cd63/Ifitm1/Sp100/Dab2ip/Notch1/Spred1/Pfn2/Adam15/Podn/Ptn/Nr2f2/Slit2/Cx3cl1/Trib1/Card10/Ptprm/Bai1/Ccl12/Fam115a/Fgf2/Limch1/Rras/2610034B18Rik/Abhd2/Dag1/Magi2/Thbs1/Nbl1/Adora1/2900011O08Rik/C77370/Bst2/Cx3cr1/Prkg1/Gpr173…	67
GO	BP	GO:0043523	regulation of neuron apoptotic process	66/2453	245/17047	1.82664e-07	5.73701e-06	ENSMUSG00000000982/ENSMUSG00000001761/ENSMUSG00000002083/ENSMUSG00000002602/ENSMUSG00000002985/ENSMUSG00000003378/ENSMUSG00000003849/ENSMUSG00000004891/ENSMUSG00000005413/ENSMUSG00000005656/ENSMUSG00000006699/ENSMUSG00000007653/ENSMUSG00000016256/ENSMUSG00000018909/ENSMUSG00000019843/ENSMUSG00000019982/ENSMUSG00000023011/ENSMUSG00000024778/ENSMUSG00000025810/ENSMUSG00000026480/ENSMUSG00000026496/…	Ccl3/Smo/Bbc3/Axl/Apoe/Grik5/Nqo1/Nes/Hmox1/Snx6/Cdc42/Gabrb2/Ctsz/Arrb1/Fyn/Myb/Faim2/Fas/Nrp1/Ncf2/Parp1/Nr4a2/Grin1/Ntrk1/Fbxw7/Gclm/Epha7/Hdac1/Chl1/Tnfrsf1a/Tyrobp/Nupr1/Casp3/Mt3/Mt1/Cx3cl1/Aars/Ptprf/Gabrb3/Cacna1a/Grn/Sncb/Ccl12/Pawr/Mcl1/En2/Tgfb2/Wfs1/Lrp1/Clcf1/Kif14/Agrn/Isl1/Amigo2/Ndnf/C5ar1/Cited1/Cx3cr1/Jun/Ntrk2/Grik2/Cebpb/Grm7/Grid2/Nrbp2/Pcp4	66
GO	MF	GO:0030165	PDZ domain binding	39/2478	111/17092	4.41523e-08	5.85018e-06	ENSMUSG00000000881/ENSMUSG00000001986/ENSMUSG00000003378/ENSMUSG00000003872/ENSMUSG00000004319/ENSMUSG00000007989/ENSMUSG00000015968/ENSMUSG00000017314/ENSMUSG00000019943/ENSMUSG00000020524/ENSMUSG00000020733/ENSMUSG00000021182/ENSMUSG00000022494/ENSMUSG00000024302/ENSMUSG00000024897/ENSMUSG00000026463/ENSMUSG00000028159/ENSMUSG00000028184/ENSMUSG00000029763/ENSMUSG00000030172/ENSMUSG00000030302/…	Dlg3/Gria3/Grik5/Lin7b/Clcn3/Fzd3/Cacna1d/Mpp2/Atp2b1/Gria1/Slc9a3r1/Ccdc88c/Shisa9/Dtna/Apba1/Atp2b4/Dapp1/Lphn2/Exoc4/Erc1/Atp2b2/Kirrel3/Bai1/Dock4/Gng12/Kcnj9/F11r/Nos1ap/Plekha1/Fzd7/Kif14/Dlgap3/Mpp3/Dlg2/Shisa6/Grik2/Grm7/Nlgn1/Grid2	39
GO	BP	GO:0031646	positive regulation of neurological system process	29/2453	75/17047	1.90769e-07	5.96003e-06	ENSMUSG00000003352/ENSMUSG00000015533/ENSMUSG00000015829/ENSMUSG00000022623/ENSMUSG00000022790/ENSMUSG00000024109/ENSMUSG00000026959/ENSMUSG00000027010/ENSMUSG00000028599/ENSMUSG00000030098/ENSMUSG00000030789/ENSMUSG00000031302/ENSMUSG00000032554/ENSMUSG00000034275/ENSMUSG00000034675/ENSMUSG00000035200/ENSMUSG00000035873/ENSMUSG00000036098/ENSMUSG00000037541/ENSMUSG00000038738/ENSMUSG00000039952/…	Cacnb3/Itga2/Tnr/Shank3/Igsf11/Nrxn1/Grin1/Slc25a12/Tnfrsf1b/Grip2/Itgax/Nlgn3/Trf/Igsf9b/Dbn1/Chrnb4/Pawr/Myrf/Shank2/Shank1/Dag1/Reln/Cux2/Zfp488/Tenm4/Neto1/Abat/Nlgn1/Cst7	29
GO	BP	GO:0051249	regulation of lymphocyte activation	92/2453	380/17047	1.97408e-07	6.13514e-06	ENSMUSG00000000409/ENSMUSG00000000693/ENSMUSG00000000732/ENSMUSG00000000957/ENSMUSG00000001123/ENSMUSG00000002147/ENSMUSG00000002602/ENSMUSG00000002633/ENSMUSG00000004266/ENSMUSG00000007655/ENSMUSG00000007817/ENSMUSG00000010142/ENSMUSG00000014361/ENSMUSG00000016206/ENSMUSG00000016493/ENSMUSG00000016496/ENSMUSG00000018899/ENSMUSG00000019982/ENSMUSG00000020101/ENSMUSG00000020399/ENSMUSG00000020612/…	Lck/Loxl3/Icosl/Mmp14/Lgals9/Stat6/Axl/Shh/Ptpn6/Cav1/Zmiz1/Tnfrsf13b/Mertk/H2-M3/Cd46/Cd274/Irf1/Myb/4632428N05Rik/Havcr2/Prkar1a/Stat5b/Zfp36l1/Gli3/Syk/Ap3b1/Il6st/Dlg5/Bmp4/Fam49b/Nckap1l/Bcl6/Samsn1/Cd86/Il15ra/Parp3/Tnfrsf21/Aif1/Anxa1/Fas/Gal/Ptprc/Mapk8ip1/Rasgrp1/Pag1/Nfatc2/Il21/Il6ra/Vcam1/Tnfrsf1b/Cd38/Dtx1/Lag3/Tyrobp/Il4ra/Sash3/Efnb1/Casp3/Tgfbr2/Nck1/Myd88/Rac2/Vav3/Nfkbiz/Tnfsf9/…	92
GO	CC	GO:0048786	presynaptic active zone	29/2474	78/17165	5.25201e-07	6.26489e-06	ENSMUSG00000007989/ENSMUSG00000015968/ENSMUSG00000017167/ENSMUSG00000019943/ENSMUSG00000024109/ENSMUSG00000024304/ENSMUSG00000024897/ENSMUSG00000026458/ENSMUSG00000026463/ENSMUSG00000028005/ENSMUSG00000029420/ENSMUSG00000030172/ENSMUSG00000030302/ENSMUSG00000031517/ENSMUSG00000032012/ENSMUSG00000033389/ENSMUSG00000034101/ENSMUSG00000034656/ENSMUSG00000036957/ENSMUSG00000037541/ENSMUSG00000038665/…	Fzd3/Cacna1d/Cntnap1/Atp2b1/Nrxn1/Cdh2/Apba1/Ppfia4/Atp2b4/Gucy1b3/Rimbp2/Erc1/Atp2b2/Gpm6a/Pvrl1/Arhgap44/Ctnnd1/Cacna1a/Lrfn3/Shank2/Dgki/Cplx3/Adora1/Ntrk2/Grm7/Flot1/Flot2/Ctnna2/Syt11	29
GO	BP	GO:0046651	lymphocyte proliferation	70/2453	266/17047	2.0966e-07	6.48198e-06	ENSMUSG00000000732/ENSMUSG00000001123/ENSMUSG00000002633/ENSMUSG00000004266/ENSMUSG00000010142/ENSMUSG00000016206/ENSMUSG00000016493/ENSMUSG00000016496/ENSMUSG00000018899/ENSMUSG00000019843/ENSMUSG00000020101/ENSMUSG00000020143/ENSMUSG00000020399/ENSMUSG00000020612/ENSMUSG00000020919/ENSMUSG00000021457/ENSMUSG00000021624/ENSMUSG00000021756/ENSMUSG00000021782/ENSMUSG00000021835/ENSMUSG00000022488/…	Icosl/Lgals9/Shh/Ptpn6/Tnfrsf13b/H2-M3/Cd46/Cd274/Irf1/Fyn/4632428N05Rik/Dock2/Havcr2/Prkar1a/Stat5b/Syk/Cd180/Il6st/Dlg5/Bmp4/Nckap1l/Bcl6/Cd86/Tnfrsf21/Aif1/Anxa1/Gal/Cd151/Ptprc/Mapk8ip1/Nfatc2/Il21/Il6ra/Vcam1/Tnfrsf1b/Cd38/P2rx7/Tyrobp/Sash3/Msn/Efnb1/Casp3/Psmb10/Tgfbr2/Nck1/Myd88/Rac2/Vav3/Ccnd3/Tnfsf9/Pawr/Cd276/Lmo1/H2-Aa/Cd81/Plcl2/Tlr4/Clcf1/Lyn/Tnfrsf14/Cd24a/Ccdc88b/Igf2/Lgals3/Rasal…	70
GO	BP	GO:0045766	positive regulation of angiogenesis	50/2453	168/17047	2.13599e-07	6.56956e-06	ENSMUSG00000000290/ENSMUSG00000002633/ENSMUSG00000004040/ENSMUSG00000004791/ENSMUSG00000005413/ENSMUSG00000014773/ENSMUSG00000015305/ENSMUSG00000015340/ENSMUSG00000015839/ENSMUSG00000016933/ENSMUSG00000019803/ENSMUSG00000021583/ENSMUSG00000021701/ENSMUSG00000022475/ENSMUSG00000023031/ENSMUSG00000023886/ENSMUSG00000023951/ENSMUSG00000024087/ENSMUSG00000024164/ENSMUSG00000024659/ENSMUSG00000025321/…	Itgb2/Shh/Stat3/Pgf/Hmox1/Dll1/Sash1/Cybb/Nfe2l2/Plcg1/Nr2e1/Erap1/Plk2/Hdac7/Cela1/Smoc2/Vegfa/Cyp1b1/C3/Anxa1/Itgb8/Nrp1/Ntrk1/Ddah1/Flt1/Tnfrsf1a/Itgax/Tlr3/Smad1/Gab1/Cx3cl1/Ets1/Ctsh/Tgfbr2/Hspb6/Lrg1/Fgf2/Rras/Thbs1/C3ar1/Isl1/S100a1/Rhoj/Igf2/C5ar1/Cx3cr1/Prkcb/Kdr/Chil1/Hmgb1	50
GO	BP	GO:0060560	developmental growth involved in morphogenesis	66/2453	246/17047	2.15094e-07	6.58144e-06	ENSMUSG00000000247/ENSMUSG00000000567/ENSMUSG00000000627/ENSMUSG00000000861/ENSMUSG00000001227/ENSMUSG00000001288/ENSMUSG00000001761/ENSMUSG00000002489/ENSMUSG00000002633/ENSMUSG00000002985/ENSMUSG00000003534/ENSMUSG00000014599/ENSMUSG00000015829/ENSMUSG00000019647/ENSMUSG00000020132/ENSMUSG00000020173/ENSMUSG00000021068/ENSMUSG00000021451/ENSMUSG00000021835/ENSMUSG00000022212/ENSMUSG00000023905/…	Lhx2/Sox9/Sema4f/Bcl11a/Sema6b/Rarg/Smo/Tiam1/Shh/Apoe/Ddr1/Csf1/Tnr/Sema6a/Rab21/Cobl/Nin/Sema4d/Bmp4/Cpne6/Tnfrsf12a/Vegfa/Syt4/Gal/Sema4g/Nrp1/Rdh10/Nrp2/Fn1/Syt2/Vangl2/Olfm1/Zeb2/Notch1/Itga4/Ttl/Epha7/Tfap2c/Sema3c/Areg/Auts2/Plxna4/Plxna1/Cyfip1/Syt3/Cttn/Cdkl5/Nlgn3/Plxna3/Slit2/Mt3/Tgfbr2/Dbn1/Lzts2/Syt1/Spry1/Picalm/Lrp1/Trim46/Flrt3/Lamb2/Yap1/Cfl1/Sema3e/Rgma/Ccr5	66
GO	BP	GO:0061572	actin filament bundle organization	48/2453	159/17047	2.31466e-07	7.04605e-06	ENSMUSG00000001847/ENSMUSG00000002233/ENSMUSG00000009073/ENSMUSG00000009376/ENSMUSG00000016382/ENSMUSG00000017144/ENSMUSG00000018387/ENSMUSG00000018909/ENSMUSG00000019997/ENSMUSG00000020120/ENSMUSG00000020388/ENSMUSG00000020580/ENSMUSG00000021262/ENSMUSG00000021886/ENSMUSG00000021998/ENSMUSG00000022623/ENSMUSG00000024397/ENSMUSG00000025810/ENSMUSG00000027646/ENSMUSG00000027805/ENSMUSG00000028832/…	Rac1/Rhoc/Nf2/Met/Pls3/Rnd3/Shroom1/Arrb1/Ctgf/Plek/Pdlim4/Rock2/Evl/Gpr65/Lcp1/Shank3/Aif1/Nrp1/Src/Pfn2/Stmn1/Fscn1/Zyx/Add2/Was/Flna/Arhgap6/Cx3cl1/Kank2/Smad3/Arap1/Dbn1/Kiss1r/Pawr/Asap3/Limch1/Fam101a/Shank1/Baiap2l1/Sh3pxd2b/S100a10/Synpo/Ppm1e/Pls1/Cd47/Cfl1/Marcks/Arhgef10	48
GO	BP	GO:0032675	regulation of interleukin-6 production	43/2453	136/17047	2.34518e-07	7.10256e-06	ENSMUSG00000001123/ENSMUSG00000004040/ENSMUSG00000004266/ENSMUSG00000006519/ENSMUSG00000016528/ENSMUSG00000018909/ENSMUSG00000020227/ENSMUSG00000020399/ENSMUSG00000021457/ENSMUSG00000022488/ENSMUSG00000023992/ENSMUSG00000024397/ENSMUSG00000024810/ENSMUSG00000026509/ENSMUSG00000026896/ENSMUSG00000027947/ENSMUSG00000027995/ENSMUSG00000028059/ENSMUSG00000029468/ENSMUSG00000030341/ENSMUSG00000030579/…	Lgals9/Stat3/Ptpn6/Cyba/Mapkapk2/Arrb1/Irak3/Havcr2/Syk/Nckap1l/Trem2/Aif1/Il33/Capn2/Ifih1/Il6ra/Tlr2/Arhgef2/P2rx7/Tnfrsf1a/Tyrobp/Trim30a/Tlr3/Tirap/Myd88/Tnfsf9/Arid5a/Nod1/Tlr4/Ddx58/Mbp/Isl1/Tlr7/Cd24a/Nr1h4/5430435G22Rik/Cd47/Cebpb/Fcer1g/Hmgb1/Syt11/C5ar2/Ccr5	43
GO	BP	GO:0048839	inner ear development	54/2453	188/17047	2.56737e-07	7.73601e-06	ENSMUSG00000000378/ENSMUSG00000000567/ENSMUSG00000001847/ENSMUSG00000002633/ENSMUSG00000002799/ENSMUSG00000004207/ENSMUSG00000007653/ENSMUSG00000007989/ENSMUSG00000009681/ENSMUSG00000014773/ENSMUSG00000016528/ENSMUSG00000017631/ENSMUSG00000019789/ENSMUSG00000019906/ENSMUSG00000020105/ENSMUSG00000020140/ENSMUSG00000020733/ENSMUSG00000021318/ENSMUSG00000021464/ENSMUSG00000021508/ENSMUSG00000021835/…	Ccm2/Sox9/Rac1/Shh/Jag2/Psap/Gabrb2/Fzd3/Bcr/Dll1/Mapkapk2/Abr/Hey2/Lin7a/Lrig3/Lgr5/Slc9a3r1/Gli3/Ror2/Cxcl14/Bmp4/Lrp10/Col2a1/Vangl2/Notch1/Lhx3/Frzb/Col11a1/Kcnq4/Mycl/Ephb2/Hpca/Dfna5/Lrig1/Atp2b2/Fgfr1/Triobp/Gabrb3/Neurod1/Cebpa/Dchs1/C1qb/Sobp/Tgfb2/Atp8b1/Clrn1/D3Bwg0562e/Kcnk3/Tifab/H2-K1/H2-T23/Cebpd/Ifi204/Sox2	54
GO	BP	GO:0048708	astrocyte differentiation	30/2453	80/17047	2.60443e-07	7.7853e-06	ENSMUSG00000000567/ENSMUSG00000001761/ENSMUSG00000001911/ENSMUSG00000002633/ENSMUSG00000004040/ENSMUSG00000014773/ENSMUSG00000019803/ENSMUSG00000020122/ENSMUSG00000020932/ENSMUSG00000021464/ENSMUSG00000021478/ENSMUSG00000021756/ENSMUSG00000023992/ENSMUSG00000024176/ENSMUSG00000026235/ENSMUSG00000026249/ENSMUSG00000026923/ENSMUSG00000027168/ENSMUSG00000028517/ENSMUSG00000028519/ENSMUSG00000031760/…	Sox9/Smo/Nfix/Shh/Stat3/Dll1/Nr2e1/Egfr/Gfap/Ror2/Drd1a/Il6st/Trem2/Sox8/Epha4/Serpine2/Notch1/Pax6/Ppap2b/Dab1/Mt3/Lif/C1qa/Atf5/Tlr4/Clcf1/C5ar1/Sox6/Lamb2/Mapk3	30
GO	BP	GO:0048709	oligodendrocyte differentiation	35/2453	101/17047	2.60996e-07	7.7853e-06	ENSMUSG00000000567/ENSMUSG00000002633/ENSMUSG00000006782/ENSMUSG00000017167/ENSMUSG00000017929/ENSMUSG00000021318/ENSMUSG00000021835/ENSMUSG00000022037/ENSMUSG00000022425/ENSMUSG00000023915/ENSMUSG00000024176/ENSMUSG00000026923/ENSMUSG00000027168/ENSMUSG00000027995/ENSMUSG00000028551/ENSMUSG00000028599/ENSMUSG00000028800/ENSMUSG00000029763/ENSMUSG00000029838/ENSMUSG00000030342/ENSMUSG00000031302/…	Sox9/Shh/Cnp/Cntnap1/B4galt5/Gli3/Bmp4/Clu/Enpp2/Tnfrsf21/Sox8/Notch1/Pax6/Tlr2/Cdkn2c/Tnfrsf1b/Hdac1/Exoc4/Ptn/Cd9/Nlgn3/Il34/Tmem98/Myrf/Zfp365/Dag1/Lyn/Zfp488/Kcnj10/Tenm4/Sox6/Ntrk2/B4galt6/Qk/Erbb2	35
GO	BP	GO:0010770	positive regulation of cell morphogenesis involved in differentiation	51/2453	174/17047	2.75154e-07	8.16657e-06	ENSMUSG00000000861/ENSMUSG00000001847/ENSMUSG00000002489/ENSMUSG00000002985/ENSMUSG00000006699/ENSMUSG00000019970/ENSMUSG00000020132/ENSMUSG00000021057/ENSMUSG00000021068/ENSMUSG00000021451/ENSMUSG00000022026/ENSMUSG00000022425/ENSMUSG00000022883/ENSMUSG00000023328/ENSMUSG00000023905/ENSMUSG00000023951/ENSMUSG00000025810/ENSMUSG00000026193/ENSMUSG00000026235/ENSMUSG00000026640/ENSMUSG00000026872/…	Bcl11a/Rac1/Tiam1/Apoe/Cdc42/Sgk1/Rab21/Akap5/Nin/Sema4d/Olfm4/Enpp2/Robo1/Ache/Tnfrsf12a/Vegfa/Nrp1/Fn1/Epha4/Plxna2/Zeb2/Ptprd/Lrp8/Plxna4/Plxna1/Plxnd1/Caprin2/Cyfip1/Cdkl5/Flna/Plxna3/Triobp/Ptprf/Dbn1/Eef2k/Plxnb2/Cul7/Picalm/Prex1/Lrp1/S100a10/Reln/Cux2/Tubb2b/Amigo1/Robo2/Ntrk2/Map6/Camk2b/Dock1/Numbl	51
GO	MF	GO:1901681	sulfur compound binding	64/2478	228/17092	7.14922e-08	8.42019e-06	ENSMUSG00000000263/ENSMUSG00000002985/ENSMUSG00000005320/ENSMUSG00000006651/ENSMUSG00000006958/ENSMUSG00000018340/ENSMUSG00000019997/ENSMUSG00000020532/ENSMUSG00000021313/ENSMUSG00000021417/ENSMUSG00000021702/ENSMUSG00000021835/ENSMUSG00000022491/ENSMUSG00000022893/ENSMUSG00000022894/ENSMUSG00000023045/ENSMUSG00000023886/ENSMUSG00000023951/ENSMUSG00000024486/ENSMUSG00000025810/ENSMUSG00000025815/…	Glra1/Apoe/Fgfr4/Aplp1/Chrd/Anxa6/Ctgf/Acaca/Ryr2/Eci2/Thbs4/Bmp4/Glycam1/Adamts1/Adamts5/Soat2/Smoc2/Vegfa/Hbegf/Nrp1/Dhtkd1/Nrp2/Fn1/Serpine2/Cfh/Dbi/Ptprc/Acbd3/Soat1/Col5a1/Anxa5/Gstm4/Col11a1/Cyr61/Lrpap1/Tgfbr3/Pcolce/Ptn/Anxa4/Prmt8/Slit2/Fgfr1/Gsta4/Ptprf/Tnxb/Cxcl10/Impg2/Fgf2/Eva1c/Thbs1/Prelp/Agrn/Adamtsl5/Rtn4rl1/Lrtm1/Ndnf/Grem2/Ptges/Nav2/Gstm1/Col25a1/Col23a1/Hmgb1/Gsta1	64
GO	BP	GO:2000146	negative regulation of cell motility	69/2453	263/17047	2.89185e-07	8.54032e-06	ENSMUSG00000000562/ENSMUSG00000000753/ENSMUSG00000001131/ENSMUSG00000001672/ENSMUSG00000002633/ENSMUSG00000002985/ENSMUSG00000004040/ENSMUSG00000006958/ENSMUSG00000009681/ENSMUSG00000015839/ENSMUSG00000016128/ENSMUSG00000016918/ENSMUSG00000017631/ENSMUSG00000020262/ENSMUSG00000020733/ENSMUSG00000020810/ENSMUSG00000021262/ENSMUSG00000021478/ENSMUSG00000021745/ENSMUSG00000021782/ENSMUSG00000022883/…	Adora3/Serpinf1/Timp1/Marveld3/Shh/Apoe/Stat3/Chrd/Bcr/Nfe2l2/Stard13/Sulf1/Abr/Adarb1/Slc9a3r1/Cygb/Evl/Drd1a/Ptprg/Dlg5/Robo1/Cyp1b1/Aif1/Ldlrad4/Fas/Il33/Arhgdia/Ptprj/Cd63/Ifitm1/Sp100/Dab2ip/Notch1/Spred1/Pfn2/Adam15/Podn/Ptn/Nr2f2/Was/Slit2/Cx3cl1/Trib1/Card10/Ptprm/Bai1/Ccl12/Fam115a/Fgf2/Limch1/Rras/2610034B18Rik/Abhd2/Dag1/Magi2/Thbs1/Nbl1/Adora1/2900011O08Rik/C77370/Bst2/Cx3cr1/Prkg1/Cf…	69
GO	BP	GO:0022898	regulation of transmembrane transporter activity	67/2453	253/17047	2.94955e-07	8.66758e-06	ENSMUSG00000003161/ENSMUSG00000003352/ENSMUSG00000006930/ENSMUSG00000007655/ENSMUSG00000009687/ENSMUSG00000014077/ENSMUSG00000015968/ENSMUSG00000016933/ENSMUSG00000017400/ENSMUSG00000017412/ENSMUSG00000020704/ENSMUSG00000020723/ENSMUSG00000020733/ENSMUSG00000021313/ENSMUSG00000021835/ENSMUSG00000022494/ENSMUSG00000022619/ENSMUSG00000022623/ENSMUSG00000022965/ENSMUSG00000023092/ENSMUSG00000023992/…	Sri/Cacnb3/Hap1/Cav1/Fxyd5/Chp1/Cacna1d/Plcg1/Stac2/Cacnb4/Asic2/Cacng4/Slc9a3r1/Ryr2/Bmp4/Shisa9/Mapk8ip2/Shank3/Ifngr2/Fhl1/Trem2/Ehd3/Nrxn1/Gal/Jph3/Stom/Lrrc26/Kcnab1/Asph/Gem/Pde4b/Ephb2/Hpca/Slc9a1/Fam115c/Nlgn3/Nedd4/Htr3a/Plcg2/Pkd2/Cacna1a/Kcnc2/Fxyd1/Fam115a/Hk1/Shank2/Nos1ap/Ctss/Shank1/Ptpn3/Cacng5/Agrn/Reln/S100a1/Kcna1/P2ry6/Neto1/Gpd1l/Amigo1/Sepn1/Prkg1/Shisa6/Cfl1/Kcnc1/Nlgn1/Ank…	67
GO	CC	GO:0098945	intrinsic component of presynaptic active zone membrane	14/2474	24/17165	7.57298e-07	8.875e-06	ENSMUSG00000015968/ENSMUSG00000019943/ENSMUSG00000024109/ENSMUSG00000024304/ENSMUSG00000026463/ENSMUSG00000030302/ENSMUSG00000031517/ENSMUSG00000032012/ENSMUSG00000034656/ENSMUSG00000036957/ENSMUSG00000039714/ENSMUSG00000056755/ENSMUSG00000061981/ENSMUSG00000068923	Cacna1d/Atp2b1/Nrxn1/Cdh2/Atp2b4/Atp2b2/Gpm6a/Pvrl1/Cacna1a/Lrfn3/Cplx3/Grm7/Flot2/Syt11	14
GO	BP	GO:0043410	positive regulation of MAPK cascade	111/2453	487/17047	3.20099e-07	9.36014e-06	ENSMUSG00000000982/ENSMUSG00000002489/ENSMUSG00000002985/ENSMUSG00000004207/ENSMUSG00000005087/ENSMUSG00000005320/ENSMUSG00000006699/ENSMUSG00000015305/ENSMUSG00000015312/ENSMUSG00000015950/ENSMUSG00000017466/ENSMUSG00000018334/ENSMUSG00000018909/ENSMUSG00000018927/ENSMUSG00000019122/ENSMUSG00000019997/ENSMUSG00000020122/ENSMUSG00000020312/ENSMUSG00000020399/ENSMUSG00000020573/ENSMUSG00000020901/…	Ccl3/Tiam1/Apoe/Psap/Cd44/Fgfr4/Cdc42/Sash1/Gadd45b/Ncf1/Timp2/Ksr1/Arrb1/Ccl6/Ccl9/Ctgf/Egfr/Shc2/Havcr2/Pik3cg/Pik3r5/Map3k14/Gadd45g/Syk/Ror2/Bmp4/Ajuba/Mapk8ip2/Robo1/Vegfa/Trem2/Fgd2/Eif2ak2/Nrxn1/C3/Map3k8/Cdh2/Csf1r/Plce1/Nrp1/Cflar/Epha4/Ptprc/Vangl2/Zeb2/Dab2ip/Notch1/Mapk8ip1/Rassf2/Rasgrp1/Ptpn1/Src/Il6ra/Efna1/Ntrk1/Fbxw7/Glipr2/Map3k6/P2rx7/Flt1/Dfna5/Tgfa/Ltbr/Irak1/Fgfr1/Tlr3/Gab1/…	111
GO	BP	GO:0051017	actin filament bundle assembly	47/2453	156/17047	3.28757e-07	9.56619e-06	ENSMUSG00000001847/ENSMUSG00000002233/ENSMUSG00000009073/ENSMUSG00000009376/ENSMUSG00000016382/ENSMUSG00000017144/ENSMUSG00000018387/ENSMUSG00000018909/ENSMUSG00000019997/ENSMUSG00000020120/ENSMUSG00000020388/ENSMUSG00000020580/ENSMUSG00000021262/ENSMUSG00000021886/ENSMUSG00000021998/ENSMUSG00000022623/ENSMUSG00000024397/ENSMUSG00000025810/ENSMUSG00000027646/ENSMUSG00000027805/ENSMUSG00000028832/…	Rac1/Rhoc/Nf2/Met/Pls3/Rnd3/Shroom1/Arrb1/Ctgf/Plek/Pdlim4/Rock2/Evl/Gpr65/Lcp1/Shank3/Aif1/Nrp1/Src/Pfn2/Stmn1/Fscn1/Zyx/Add2/Was/Flna/Arhgap6/Cx3cl1/Kank2/Smad3/Arap1/Dbn1/Kiss1r/Pawr/Asap3/Limch1/Shank1/Baiap2l1/Sh3pxd2b/S100a10/Synpo/Ppm1e/Pls1/Cd47/Cfl1/Marcks/Arhgef10	47
GO	BP	GO:0051092	positive regulation of NF-kappaB transcription factor activity	40/2453	124/17047	3.38113e-07	9.74893e-06	ENSMUSG00000000266/ENSMUSG00000000275/ENSMUSG00000000290/ENSMUSG00000004040/ENSMUSG00000007655/ENSMUSG00000020227/ENSMUSG00000022037/ENSMUSG00000024079/ENSMUSG00000024927/ENSMUSG00000025034/ENSMUSG00000026031/ENSMUSG00000026305/ENSMUSG00000026637/ENSMUSG00000027187/ENSMUSG00000027995/ENSMUSG00000028059/ENSMUSG00000028072/ENSMUSG00000028602/ENSMUSG00000031392/ENSMUSG00000031639/ENSMUSG00000031778/…	Mid2/Trim25/Itgb2/Stat3/Cav1/Irak3/Clu/Eif2ak2/Rela/Trim8/Cflar/Lrrfip1/Traf5/Cat/Tlr2/Arhgef2/Ntrk1/Tnfrsf8/Irak1/Tlr3/Cx3cl1/Tradd/Tirap/Myd88/Eda2r/Icam1/Rtkn2/Nod1/Tlr4/Trim62/Rnf31/Trim32/Cx3cr1/5430435G22Rik/Prkcb/Flot1/Irak4/Irak2/Flot2/Capn3	40
GO	BP	GO:0051924	regulation of calcium ion transport	68/2453	259/17047	3.41572e-07	9.74893e-06	ENSMUSG00000000617/ENSMUSG00000000982/ENSMUSG00000003161/ENSMUSG00000003352/ENSMUSG00000004113/ENSMUSG00000004266/ENSMUSG00000006519/ENSMUSG00000006930/ENSMUSG00000007655/ENSMUSG00000015968/ENSMUSG00000016933/ENSMUSG00000017400/ENSMUSG00000017412/ENSMUSG00000019843/ENSMUSG00000019943/ENSMUSG00000020573/ENSMUSG00000020577/ENSMUSG00000020866/ENSMUSG00000021057/ENSMUSG00000021313/ENSMUSG00000021478/…	Grm6/Ccl3/Sri/Cacnb3/Cacna1b/Ptpn6/Cyba/Hap1/Cav1/Cacna1d/Plcg1/Stac2/Cacnb4/Fyn/Atp2b1/Pik3cg/Tspan13/Cacna1g/Akap5/Ryr2/Drd1a/Bmp4/Jph4/Ehd3/Jph3/Homer2/Dbi/Grin1/Asph/Gem/Pde4b/Hpca/Slc9a1/P2rx7/P2rx4/Itpr1/Atp2b2/Gnao1/Cx3cl1/Agt/Ubash3b/Gnai2/Slc8b1/Plcg2/Pkd2/Cacna1a/Cxcl10/Ccl12/Pawr/P2ry12/Icam1/Cd84/Nos1ap/Tgfb2/Wfs1/Tspo/Lyn/S100a1/Prkce/P2ry6/Orai1/Mchr1/Lgals3/Sepn1/Cacna1c/Slc8a1/Ahn…	68
GO	BP	GO:0045685	regulation of glial cell differentiation	31/2453	85/17047	3.41607e-07	9.74893e-06	ENSMUSG00000002633/ENSMUSG00000010086/ENSMUSG00000019803/ENSMUSG00000021756/ENSMUSG00000021835/ENSMUSG00000022425/ENSMUSG00000023915/ENSMUSG00000023992/ENSMUSG00000024927/ENSMUSG00000026235/ENSMUSG00000026249/ENSMUSG00000026923/ENSMUSG00000027315/ENSMUSG00000027995/ENSMUSG00000028519/ENSMUSG00000028599/ENSMUSG00000028800/ENSMUSG00000029838/ENSMUSG00000031750/ENSMUSG00000034394/ENSMUSG00000035413/…	Shh/Rnf112/Nr2e1/Il6st/Bmp4/Enpp2/Tnfrsf21/Trem2/Rela/Epha4/Serpine2/Notch1/Spint1/Tlr2/Dab1/Tnfrsf1b/Hdac1/Ptn/Il34/Lif/Tmem98/C1qa/Zfp365/Atf5/Dag1/Clcf1/Zfp488/Tenm4/C5ar1/Lin28a/Qk	31
GO	BP	GO:0097061	dendritic spine organization	31/2453	85/17047	3.41607e-07	9.74893e-06	ENSMUSG00000001507/ENSMUSG00000002489/ENSMUSG00000002985/ENSMUSG00000005958/ENSMUSG00000006699/ENSMUSG00000019843/ENSMUSG00000022623/ENSMUSG00000026235/ENSMUSG00000026959/ENSMUSG00000027954/ENSMUSG00000028613/ENSMUSG00000028664/ENSMUSG00000029245/ENSMUSG00000030309/ENSMUSG00000031078/ENSMUSG00000031302/ENSMUSG00000033389/ENSMUSG00000034675/ENSMUSG00000035064/ENSMUSG00000035168/ENSMUSG00000037541/…	Itga3/Tiam1/Apoe/Ephb3/Cdc42/Fyn/Shank3/Epha4/Grin1/Efna1/Lrp8/Ephb2/Epha5/Caprin2/Cttn/Nlgn3/Arhgap44/Dbn1/Eef2k/Tanc1/Shank2/Zfp365/Srcin1/Shank1/Reln/Cux2/Sipa1l1/Cfl1/Camk2b/Nlgn1/Zfp804a	31
GO	BP	GO:0050731	positive regulation of peptidyl-tyrosine phosphorylation	53/2453	185/17047	3.61635e-07	1.02711e-05	ENSMUSG00000000409/ENSMUSG00000000881/ENSMUSG00000004815/ENSMUSG00000005087/ENSMUSG00000006435/ENSMUSG00000015947/ENSMUSG00000015950/ENSMUSG00000019843/ENSMUSG00000021451/ENSMUSG00000021457/ENSMUSG00000021702/ENSMUSG00000021756/ENSMUSG00000022425/ENSMUSG00000022906/ENSMUSG00000023951/ENSMUSG00000023992/ENSMUSG00000024486/ENSMUSG00000024621/ENSMUSG00000025810/ENSMUSG00000026235/ENSMUSG00000026395/…	Lck/Dlg3/Dgkq/Cd44/Neurl1a/Fcgr1/Ncf1/Fyn/Sema4d/Syk/Thbs4/Il6st/Enpp2/Parp9/Vegfa/Trem2/Hbegf/Csf1r/Nrp1/Epha4/Ptprc/Ptpn1/Src/Il21/Il6ra/Efna1/Arhgef2/Fbxw7/Ppap2b/Lrp8/Hdac1/Areg/Tgfa/Tnfrsf1a/Agt/Ctnnd1/Lif/Parp14/Icam1/Cd81/Srcin1/Tlr4/Clcf1/Agrn/Lyn/Isl1/Tnfrsf14/Adora1/Reln/Dok7/Cd24a/Igf2/Cntn1	53
GO	BP	GO:0002224	toll-like receptor signaling pathway	34/2453	98/17047	3.73176e-07	1.05484e-05	ENSMUSG00000001123/ENSMUSG00000006519/ENSMUSG00000007655/ENSMUSG00000016528/ENSMUSG00000018899/ENSMUSG00000020227/ENSMUSG00000020399/ENSMUSG00000020641/ENSMUSG00000022901/ENSMUSG00000025017/ENSMUSG00000025498/ENSMUSG00000025779/ENSMUSG00000026883/ENSMUSG00000027995/ENSMUSG00000030921/ENSMUSG00000031392/ENSMUSG00000031639/ENSMUSG00000032041/ENSMUSG00000032508/ENSMUSG00000032577/ENSMUSG00000033777/…	Lgals9/Cyba/Cav1/Mapkapk2/Irf1/Irak3/Havcr2/Rsad2/Cd86/Pik3ap1/Irf7/Ly96/Dab2ip/Tlr2/Trim30a/Irak1/Tlr3/Tirap/Myd88/Mapkapk3/Tlr13/Unc93b1/Tlr4/Lyn/Tril/Tlr7/Prkce/Nr1h4/Cd14/5430435G22Rik/Flot1/Tnip2/Irak2/Hmgb1	34
GO	CC	GO:0045335	phagocytic vesicle	33/2474	97/17165	9.53544e-07	1.08538e-05	ENSMUSG00000001750/ENSMUSG00000004319/ENSMUSG00000004626/ENSMUSG00000006699/ENSMUSG00000015243/ENSMUSG00000015340/ENSMUSG00000016534/ENSMUSG00000017774/ENSMUSG00000021262/ENSMUSG00000021457/ENSMUSG00000023460/ENSMUSG00000024308/ENSMUSG00000024743/ENSMUSG00000025278/ENSMUSG00000026696/ENSMUSG00000028221/ENSMUSG00000029860/ENSMUSG00000031165/ENSMUSG00000036943/ENSMUSG00000037321/ENSMUSG00000041598/…	Tcirg1/Clcn3/Stxbp2/Cdc42/Abca1/Cybb/Lamp2/Myo1c/Evl/Syk/Rab12/Tapbp/Syt7/Flnb/Vamp4/Tmem55a/Zyx/Was/Rab8b/Tap1/Cdc42ep4/Tlr7/Irgm1/Pld4/5430435G22Rik/Fmnl1/Rab31/H2-Q7/B2m/H2-K1/H2-T23/Syt11/H2-D1	33
GO	CC	GO:0008328	ionotropic glutamate receptor complex	22/2474	52/17165	9.58644e-07	1.08538e-05	ENSMUSG00000000881/ENSMUSG00000001985/ENSMUSG00000001986/ENSMUSG00000003378/ENSMUSG00000007783/ENSMUSG00000020524/ENSMUSG00000020723/ENSMUSG00000022494/ENSMUSG00000022623/ENSMUSG00000025892/ENSMUSG00000026833/ENSMUSG00000026959/ENSMUSG00000032172/ENSMUSG00000037541/ENSMUSG00000038738/ENSMUSG00000040373/ENSMUSG00000042388/ENSMUSG00000052572/ENSMUSG00000053930/ENSMUSG00000056073/ENSMUSG00000063887/…	Dlg3/Grik3/Gria3/Grik5/Cpt1c/Gria1/Cacng4/Shisa9/Shank3/Gria4/Olfm1/Grin1/Olfm2/Shank2/Shank1/Cacng5/Dlgap3/Dlg2/Shisa6/Grik2/Nlgn1/Grid2	22
GO	BP	GO:0048762	mesenchymal cell differentiation	56/2453	200/17047	3.91618e-07	1.10173e-05	ENSMUSG00000000567/ENSMUSG00000000627/ENSMUSG00000000693/ENSMUSG00000001227/ENSMUSG00000001761/ENSMUSG00000002489/ENSMUSG00000002633/ENSMUSG00000015647/ENSMUSG00000018340/ENSMUSG00000019647/ENSMUSG00000019789/ENSMUSG00000021451/ENSMUSG00000021782/ENSMUSG00000021835/ENSMUSG00000023951/ENSMUSG00000024176/ENSMUSG00000024544/ENSMUSG00000025207/ENSMUSG00000025810/ENSMUSG00000025921/ENSMUSG00000025969/…	Sox9/Sema4f/Loxl3/Sema6b/Smo/Tiam1/Shh/Lama5/Anxa6/Sema6a/Hey2/Sema4d/Dlg5/Bmp4/Vegfa/Sox8/Ldlrad4/Sema4g/Nrp1/Rdh10/Nrp2/Fn1/Vangl2/Olfm1/Acvr1/Zeb2/Dab2ip/Notch1/Frzb/Pax6/Wwtr1/Efna1/Adam15/Sdcbp/Glipr2/Pdpn/Sema3c/Tgfbr3/Efnb1/Flna/Fgfr1/Smad3/Tgfbr2/Pawr/Spry1/Cul7/Tgfb2/Dag1/Trim62/Isl1/Phldb1/Cfl1/Mapk3/Bcl9l/Sema3e/Zfp703	56
GO	BP	GO:0071216	cellular response to biotic stimulus	58/2453	210/17047	4.04623e-07	1.13221e-05	ENSMUSG00000000982/ENSMUSG00000002602/ENSMUSG00000009681/ENSMUSG00000015243/ENSMUSG00000015305/ENSMUSG00000016496/ENSMUSG00000018774/ENSMUSG00000020399/ENSMUSG00000020638/ENSMUSG00000021423/ENSMUSG00000021457/ENSMUSG00000021624/ENSMUSG00000022500/ENSMUSG00000022901/ENSMUSG00000023992/ENSMUSG00000024927/ENSMUSG00000025779/ENSMUSG00000025888/ENSMUSG00000026509/ENSMUSG00000026712/ENSMUSG00000026822/…	Ccl3/Axl/Bcr/Abca1/Sash1/Cd274/Cd68/Havcr2/Cmpk2/Ly86/Syk/Cd180/Litaf/Cd86/Trem2/Rela/Ly96/Casp1/Capn2/Mrc1/Lcn2/Dab2ip/Src/Tlr2/Nfkb1/Gbp2/Pde4b/Tnfrsf1b/Irak1/Eif2ak3/Cx3cl1/Plscr1/Plscr2/Trib1/Myd88/Cxcl10/Ccl12/Sbno2/Arid5a/Txnip/Tlr4/Irf8/Tspo/Lyn/Zfp36/Prkce/Nr1h4/Cd14/Cx3cr1/Tmco1/Cebpb/Fcgr4/Tnip2/Irak2/Mapk3/Hmgb1/Irgm2/Ccr5	58
GO	BP	GO:0034767	positive regulation of ion transmembrane transport	51/2453	176/17047	4.06267e-07	1.13221e-05	ENSMUSG00000003161/ENSMUSG00000003352/ENSMUSG00000006930/ENSMUSG00000014077/ENSMUSG00000015968/ENSMUSG00000016933/ENSMUSG00000017400/ENSMUSG00000017412/ENSMUSG00000020704/ENSMUSG00000020723/ENSMUSG00000020733/ENSMUSG00000021313/ENSMUSG00000021478/ENSMUSG00000021835/ENSMUSG00000022623/ENSMUSG00000022965/ENSMUSG00000023992/ENSMUSG00000024065/ENSMUSG00000024907/ENSMUSG00000026385/ENSMUSG00000026961/…	Sri/Cacnb3/Hap1/Chp1/Cacna1d/Plcg1/Stac2/Cacnb4/Asic2/Cacng4/Slc9a3r1/Ryr2/Drd1a/Bmp4/Shank3/Ifngr2/Trem2/Ehd3/Gal/Dbi/Lrrc26/Asph/Ephb2/Slc9a1/P2rx7/Arl6ip1/Nlgn3/Flna/Cx3cl1/Agt/Htr3a/Plcg2/Pkd2/Cxcl10/Kcnc2/Fxyd1/Fam115a/Ctss/Reln/S100a1/Kcna1/P2ry6/Amigo1/Cacna1c/Prkg1/Cfl1/Kcnc1/Dpp6/Ano6/Ank3/Capn3	51
GO	BP	GO:0045687	positive regulation of glial cell differentiation	22/2453	50/17047	4.08858e-07	1.1341e-05	ENSMUSG00000002633/ENSMUSG00000010086/ENSMUSG00000021756/ENSMUSG00000022425/ENSMUSG00000023992/ENSMUSG00000024927/ENSMUSG00000026249/ENSMUSG00000026923/ENSMUSG00000027315/ENSMUSG00000027995/ENSMUSG00000028599/ENSMUSG00000028800/ENSMUSG00000029838/ENSMUSG00000031750/ENSMUSG00000034394/ENSMUSG00000036887/ENSMUSG00000037855/ENSMUSG00000039952/ENSMUSG00000040663/ENSMUSG00000044519/ENSMUSG00000048078/…	Shh/Rnf112/Il6st/Enpp2/Trem2/Rela/Serpine2/Notch1/Spint1/Tlr2/Tnfrsf1b/Hdac1/Ptn/Il34/Lif/C1qa/Zfp365/Dag1/Clcf1/Zfp488/Tenm4/Qk	22
GO	BP	GO:1904018	positive regulation of vasculature development	53/2453	186/17047	4.35926e-07	1.20356e-05	ENSMUSG00000000290/ENSMUSG00000002633/ENSMUSG00000004040/ENSMUSG00000004791/ENSMUSG00000005413/ENSMUSG00000014773/ENSMUSG00000015305/ENSMUSG00000015340/ENSMUSG00000015839/ENSMUSG00000016933/ENSMUSG00000019803/ENSMUSG00000021583/ENSMUSG00000021701/ENSMUSG00000022475/ENSMUSG00000023031/ENSMUSG00000023886/ENSMUSG00000023951/ENSMUSG00000024087/ENSMUSG00000024164/ENSMUSG00000024659/ENSMUSG00000025321/…	Itgb2/Shh/Stat3/Pgf/Hmox1/Dll1/Sash1/Cybb/Nfe2l2/Plcg1/Nr2e1/Erap1/Plk2/Hdac7/Cela1/Smoc2/Vegfa/Cyp1b1/C3/Anxa1/Itgb8/Nrp1/Cflar/Notch1/Il6ra/Ntrk1/Ddah1/Flt1/Tnfrsf1a/Itgax/Tlr3/Smad1/Gab1/Cx3cl1/Ets1/Ctsh/Tgfbr2/Hspb6/Lrg1/Fgf2/Rras/Thbs1/C3ar1/Isl1/S100a1/Rhoj/Igf2/C5ar1/Cx3cr1/Prkcb/Kdr/Chil1/Hmgb1	53
GO	BP	GO:0038084	vascular endothelial growth factor signaling pathway	18/2453	36/17047	4.42486e-07	1.21041e-05	ENSMUSG00000004791/ENSMUSG00000014773/ENSMUSG00000017774/ENSMUSG00000019647/ENSMUSG00000022883/ENSMUSG00000023886/ENSMUSG00000023951/ENSMUSG00000025351/ENSMUSG00000025810/ENSMUSG00000025969/ENSMUSG00000026883/ENSMUSG00000029648/ENSMUSG00000031486/ENSMUSG00000031714/ENSMUSG00000053477/ENSMUSG00000054793/ENSMUSG00000059895/ENSMUSG00000062960	Pgf/Dll1/Myo1c/Sema6a/Robo1/Smoc2/Vegfa/Cd63/Nrp1/Nrp2/Dab2ip/Flt1/Gpr124/Gab1/Tcf4/Cadm4/Ptp4a3/Kdr	18
GO	BP	GO:1903053	regulation of extracellular matrix organization	18/2453	36/17047	4.42486e-07	1.21041e-05	ENSMUSG00000000392/ENSMUSG00000000567/ENSMUSG00000003534/ENSMUSG00000005320/ENSMUSG00000022780/ENSMUSG00000026031/ENSMUSG00000026923/ENSMUSG00000028583/ENSMUSG00000028599/ENSMUSG00000029581/ENSMUSG00000030341/ENSMUSG00000031980/ENSMUSG00000032035/ENSMUSG00000032402/ENSMUSG00000039239/ENSMUSG00000039952/ENSMUSG00000048537/ENSMUSG00000063765	Fap/Sox9/Ddr1/Fgfr4/Mfi2/Cflar/Notch1/Pdpn/Tnfrsf1b/Fscn1/Tnfrsf1a/Agt/Ets1/Smad3/Tgfb2/Dag1/Phldb1/Chadl	18
GO	BP	GO:0050730	regulation of peptidyl-tyrosine phosphorylation	66/2453	251/17047	4.76445e-07	1.29733e-05	ENSMUSG00000000409/ENSMUSG00000000881/ENSMUSG00000004266/ENSMUSG00000004815/ENSMUSG00000005087/ENSMUSG00000006435/ENSMUSG00000007655/ENSMUSG00000009073/ENSMUSG00000015947/ENSMUSG00000015950/ENSMUSG00000018899/ENSMUSG00000019843/ENSMUSG00000020122/ENSMUSG00000021451/ENSMUSG00000021457/ENSMUSG00000021702/ENSMUSG00000021756/ENSMUSG00000022425/ENSMUSG00000022876/ENSMUSG00000022906/ENSMUSG00000023951/…	Lck/Dlg3/Ptpn6/Dgkq/Cd44/Neurl1a/Cav1/Nf2/Fcgr1/Ncf1/Irf1/Fyn/Egfr/Sema4d/Syk/Thbs4/Il6st/Enpp2/Samsn1/Parp9/Vegfa/Trem2/Hbegf/Csf1r/Nrp1/Epha4/Ptprc/Ptpn1/Src/Il21/Il6ra/Efna1/Arhgef2/Fbxw7/Epha7/Ppap2b/Lrp8/Hdac1/Areg/Tgfa/Tnfrsf1a/Mvp/Agt/Ctnnd1/Lif/Parp14/Zfyve28/Icam1/Cd81/Srcin1/Tlr4/Clcf1/Agrn/Inpp5f/Lyn/Isl1/Tnfrsf14/Adora1/Reln/Dok7/Prkce/Cd24a/Igf2/Socs3/Cadm4/Cntn1	66
GO	BP	GO:0097530	granulocyte migration	39/2453	121/17047	4.83412e-07	1.31029e-05	ENSMUSG00000000982/ENSMUSG00000001847/ENSMUSG00000002897/ENSMUSG00000014599/ENSMUSG00000018927/ENSMUSG00000019122/ENSMUSG00000021457/ENSMUSG00000021702/ENSMUSG00000022488/ENSMUSG00000023951/ENSMUSG00000024659/ENSMUSG00000026072/ENSMUSG00000028525/ENSMUSG00000028635/ENSMUSG00000028859/ENSMUSG00000031558/ENSMUSG00000031778/ENSMUSG00000031990/ENSMUSG00000032508/ENSMUSG00000033220/ENSMUSG00000033721/…	Ccl3/Rac1/Il17ra/Csf1/Ccl6/Ccl9/Syk/Thbs4/Nckap1l/Vegfa/Anxa1/Il1r1/Pde4b/Edn2/Csf3r/Slit2/Cx3cl1/Jam3/Myd88/Rac2/Vav3/Vav1/Cxcl10/Ccl12/Cd99l2/Pawr/Itga9/Tgfb2/Prex1/C3ar1/Cmklr1/C5ar1/Lgals3/Prtn3/Fcer1g/Irak4/Mospd2/Mapk3/C5ar2	39
GO	BP	GO:0070371	ERK1 and ERK2 cascade	78/2453	313/17047	4.88163e-07	1.31715e-05	ENSMUSG00000000567/ENSMUSG00000000982/ENSMUSG00000002489/ENSMUSG00000002985/ENSMUSG00000004266/ENSMUSG00000005087/ENSMUSG00000005320/ENSMUSG00000006445/ENSMUSG00000007655/ENSMUSG00000018909/ENSMUSG00000018927/ENSMUSG00000019122/ENSMUSG00000019647/ENSMUSG00000019960/ENSMUSG00000019997/ENSMUSG00000020044/ENSMUSG00000020122/ENSMUSG00000020399/ENSMUSG00000020733/ENSMUSG00000021127/ENSMUSG00000021457/…	Sox9/Ccl3/Tiam1/Apoe/Ptpn6/Cd44/Fgfr4/Epha2/Cav1/Arrb1/Ccl6/Ccl9/Sema6a/Dusp6/Ctgf/Timp3/Egfr/Havcr2/Slc9a3r1/Zfp36l1/Syk/Bmp4/Vegfa/Trem2/Nrxn1/C3/Spry4/Csf1r/Nrp1/Cflar/Fn1/Ptprc/Atf3/Dab2ip/Notch1/Itgav/Rasgrp1/Spred1/Ptpn1/Src/Ntrk1/Fbxw7/Cyr61/Epha7/Glipr2/Ephb2/Lmo3/Cckbr/Mt3/Cx3cl1/Necab2/Agt/Tirap/Ctsh/Trf/Gnai2/Lif/Ccl12/Spry1/Fgf2/Icam1/Nod1/Rras/Akap12/Tlr4/Dusp26/Lrp1/Clcf1/Lyn/P2ry6/…	78
GO	CC	GO:0032587	ruffle membrane	30/2474	85/17165	1.22034e-06	1.35864e-05	ENSMUSG00000000392/ENSMUSG00000000915/ENSMUSG00000001847/ENSMUSG00000002489/ENSMUSG00000004056/ENSMUSG00000006445/ENSMUSG00000015745/ENSMUSG00000017774/ENSMUSG00000018334/ENSMUSG00000020120/ENSMUSG00000021877/ENSMUSG00000021998/ENSMUSG00000022451/ENSMUSG00000024013/ENSMUSG00000024397/ENSMUSG00000027087/ENSMUSG00000027646/ENSMUSG00000028059/ENSMUSG00000028583/ENSMUSG00000028874/ENSMUSG00000030465/…	Fap/Hip1r/Rac1/Tiam1/Akt2/Epha2/Plekho1/Myo1c/Ksr1/Plek/Arf4/Lcp1/Twf1/Fgd2/Aif1/Itgav/Src/Arhgef2/Pdpn/Fgr/Psd3/Cdkl5/Mtss1l/Pip5k1c/Hmha1/Eef1a1/Ppp1r9b/Plekha1/Ddx58/Cfl1	30
GO	BP	GO:0050863	regulation of T cell activation	71/2453	277/17047	5.10623e-07	1.37152e-05	ENSMUSG00000000409/ENSMUSG00000000693/ENSMUSG00000000732/ENSMUSG00000001123/ENSMUSG00000002633/ENSMUSG00000004266/ENSMUSG00000007655/ENSMUSG00000007817/ENSMUSG00000016206/ENSMUSG00000016493/ENSMUSG00000016496/ENSMUSG00000018899/ENSMUSG00000019982/ENSMUSG00000020101/ENSMUSG00000020399/ENSMUSG00000020612/ENSMUSG00000020919/ENSMUSG00000021318/ENSMUSG00000021457/ENSMUSG00000021686/ENSMUSG00000021756/…	Lck/Loxl3/Icosl/Lgals9/Shh/Ptpn6/Cav1/Zmiz1/H2-M3/Cd46/Cd274/Irf1/Myb/4632428N05Rik/Havcr2/Prkar1a/Stat5b/Gli3/Syk/Ap3b1/Il6st/Dlg5/Bmp4/Fam49b/Nckap1l/Bcl6/Cd86/Tnfrsf21/Aif1/Anxa1/Ptprc/Mapk8ip1/Rasgrp1/Pag1/Il21/Il6ra/Vcam1/Tnfrsf1b/Dtx1/Lag3/Il4ra/Sash3/Efnb1/Casp3/Tgfbr2/Nck1/Rac2/Nfkbiz/Tnfsf9/Pawr/Cd276/Lmo1/H2-Aa/Cd81/Fgl2/Tnfrsf14/Cd24a/Ccdc88b/Igf2/Lgals3/Rasal3/Zfp608/Cd47/Cebpb/Flot2/…	71
GO	CC	GO:0019897	extrinsic component of plasma membrane	50/2474	177/17165	1.27254e-06	1.39354e-05	ENSMUSG00000000001/ENSMUSG00000000409/ENSMUSG00000001025/ENSMUSG00000001847/ENSMUSG00000002489/ENSMUSG00000002985/ENSMUSG00000003283/ENSMUSG00000016763/ENSMUSG00000017400/ENSMUSG00000018001/ENSMUSG00000019843/ENSMUSG00000020135/ENSMUSG00000021313/ENSMUSG00000022620/ENSMUSG00000022623/ENSMUSG00000023439/ENSMUSG00000024302/ENSMUSG00000024304/ENSMUSG00000024659/ENSMUSG00000024697/ENSMUSG00000025555/…	Gnai3/Lck/S100a6/Rac1/Tiam1/Apoe/Hck/Scube1/Stac2/Cyth3/Fyn/Apc2/Ryr2/Arsa/Shank3/Gnb3/Dtna/Cdh2/Anxa1/Gna14/Farp1/Serpine2/Cdh7/Olfm1/Src/Kcnab1/Rab13/Fgr/Gnb2/Cdh11/Gnao1/Cdh13/Olfm2/Trf/Gnai2/Ctnnd1/Gna15/Gng12/Cdh8/Fermt2/Dgki/Picalm/Magi2/S100a10/Lyn/Cdh20/Gnai1/Cdh24/Cdh3/Ctnna2	50
GO	BP	GO:0043010	camera-type eye development	78/2453	314/17047	5.59542e-07	1.49614e-05	ENSMUSG00000000247/ENSMUSG00000000567/ENSMUSG00000000617/ENSMUSG00000000753/ENSMUSG00000001288/ENSMUSG00000001521/ENSMUSG00000001750/ENSMUSG00000002633/ENSMUSG00000004891/ENSMUSG00000006445/ENSMUSG00000009073/ENSMUSG00000012609/ENSMUSG00000014361/ENSMUSG00000014773/ENSMUSG00000017639/ENSMUSG00000019803/ENSMUSG00000019943/ENSMUSG00000020122/ENSMUSG00000020467/ENSMUSG00000021239/ENSMUSG00000021318/…	Lhx2/Sox9/Grm6/Serpinf1/Rarg/Tulp3/Tcirg1/Shh/Nes/Epha2/Nf2/Ttll5/Mertk/Dll1/Rab11fip4/Nr2e1/Atp2b1/Egfr/Efemp1/Vsx2/Gli3/Agtpbp1/Lpcat1/Bmp4/Pvrl3/Arl6/Ache/Vegfa/Man2a1/Cyp1b1/Sox8/Celf4/Lrp5/Pde6c/Gdf11/Nrp1/Rdh10/Atp2b4/Zeb2/Pax6/Rpe65/Tmod1/Ephb2/Hpca/Hdac1/Smarcd3/Foxp2/Ptn/Col4a1/Gpm6a/Pvrl1/Stra6/Smad3/Tgfbr2/Ptprm/Lif/Neurod1/Six3/Tgfb2/Sdk1/Ndp/Sdk2/Aqp5/Rhoj/Neurod4/Cacna1c/Bmpr1b/Jun/…	78
GO	BP	GO:0001503	ossification	85/2453	351/17047	5.63493e-07	1.49995e-05	ENSMUSG00000000567/ENSMUSG00000000957/ENSMUSG00000000982/ENSMUSG00000001750/ENSMUSG00000001761/ENSMUSG00000002633/ENSMUSG00000006445/ENSMUSG00000006958/ENSMUSG00000007041/ENSMUSG00000014599/ENSMUSG00000019773/ENSMUSG00000019943/ENSMUSG00000019997/ENSMUSG00000020393/ENSMUSG00000020641/ENSMUSG00000021318/ENSMUSG00000021451/ENSMUSG00000021464/ENSMUSG00000021756/ENSMUSG00000021835/ENSMUSG00000022098/…	Sox9/Mmp14/Ccl3/Tcirg1/Smo/Shh/Epha2/Chrd/Clic1/Csf1/Fbxo5/Atp2b1/Ctgf/Kremen1/Rsad2/Gli3/Sema4d/Ror2/Il6st/Bmp4/Bmp1/Hdac7/Col2a1/Ccrn4l/Ache/Vegfa/Sox8/Lrp5/Ltbp3/Kazald1/Limd1/Ifitm1/Acvr1/Notch1/Rassf2/Wwtr1/Adar/Col11a1/Lmna/Cyr61/Npr2/Fgr/Rest/Areg/P2rx7/Ptn/Clec5a/Calca/Chrdl1/Gpm6b/Fgfr1/Eif2ak3/Smad1/Smad3/Pth1r/Inppl1/Cebpa/Sbno2/Isg15/Cd276/Igsf10/Dchs1/Fgf2/Klf10/Egr2/Fam101a/Tgfb2/Sh…	85
GO	BP	GO:0050870	positive regulation of T cell activation	50/2453	173/17047	5.7328e-07	1.51919e-05	ENSMUSG00000000409/ENSMUSG00000000732/ENSMUSG00000001123/ENSMUSG00000002633/ENSMUSG00000007655/ENSMUSG00000007817/ENSMUSG00000016206/ENSMUSG00000016493/ENSMUSG00000016496/ENSMUSG00000018899/ENSMUSG00000019982/ENSMUSG00000020101/ENSMUSG00000020399/ENSMUSG00000020919/ENSMUSG00000021318/ENSMUSG00000021457/ENSMUSG00000021686/ENSMUSG00000021756/ENSMUSG00000022378/ENSMUSG00000022488/ENSMUSG00000022508/…	Lck/Icosl/Lgals9/Shh/Cav1/Zmiz1/H2-M3/Cd46/Cd274/Irf1/Myb/4632428N05Rik/Havcr2/Stat5b/Gli3/Syk/Ap3b1/Il6st/Fam49b/Nckap1l/Bcl6/Cd86/Aif1/Anxa1/Ptprc/Rasgrp1/Il21/Il6ra/Vcam1/Il4ra/Sash3/Efnb1/Tgfbr2/Nck1/Nfkbiz/Tnfsf9/Cd276/H2-Aa/Cd81/Tnfrsf14/Cd24a/Ccdc88b/Igf2/Rasal3/Cd47/Flot2/H2-T23/Lgals1/Cd59b/H2-Ab1	50
GO	CC	GO:0099059	integral component of presynaptic active zone membrane	2474-12-01	19/17165	1.46762e-06	1.55935e-05	ENSMUSG00000015968/ENSMUSG00000019943/ENSMUSG00000024109/ENSMUSG00000024304/ENSMUSG00000026463/ENSMUSG00000030302/ENSMUSG00000031517/ENSMUSG00000032012/ENSMUSG00000034656/ENSMUSG00000036957/ENSMUSG00000056755/ENSMUSG00000068923	Cacna1d/Atp2b1/Nrxn1/Cdh2/Atp2b4/Atp2b2/Gpm6a/Pvrl1/Cacna1a/Lrfn3/Grm7/Syt11	12
GO	CC	GO:0034702	ion channel complex	71/2474	284/17165	1.47064e-06	1.55935e-05	ENSMUSG00000000263/ENSMUSG00000000881/ENSMUSG00000001985/ENSMUSG00000001986/ENSMUSG00000003352/ENSMUSG00000003378/ENSMUSG00000004113/ENSMUSG00000007041/ENSMUSG00000007653/ENSMUSG00000007783/ENSMUSG00000010066/ENSMUSG00000010803/ENSMUSG00000015968/ENSMUSG00000016346/ENSMUSG00000017412/ENSMUSG00000020436/ENSMUSG00000020524/ENSMUSG00000020723/ENSMUSG00000020866/ENSMUSG00000021313/ENSMUSG00000021973/…	Glra1/Dlg3/Grik3/Gria3/Cacnb3/Grik5/Cacna1b/Clic1/Gabrb2/Cpt1c/Cacna2d2/Gabra1/Cacna1d/Kcnq2/Cacnb4/Gabrg2/Gria1/Cacng4/Cacna1g/Ryr2/Micu2/Shisa9/Shank3/Clic6/Scn8a/Cacna1h/Gria4/Olfm1/Grin1/Lrrc26/Kcnab1/Pde4b/Kcnq4/Ano1/Cttn/Herpud1/Olfm2/Htr3a/Pkd1/Gabrb3/Kcnk1/Pkd2/Cacna1a/Ttyh2/Scn7a/Chrnb4/Kcnc2/Ttyh3/Shank2/Nos1ap/Shank1/Cntnap2/Cacng5/Kcnd3/Dlgap3/Kcng4/Kcna5/Kcna1/Amigo1/Cacna1c/Dlg2/Shi…	71
GO	BP	GO:0050777	negative regulation of immune response	44/2453	145/17047	6.19391e-07	1.63409e-05	ENSMUSG00000000693/ENSMUSG00000001123/ENSMUSG00000002147/ENSMUSG00000004266/ENSMUSG00000005413/ENSMUSG00000009681/ENSMUSG00000016206/ENSMUSG00000016481/ENSMUSG00000016493/ENSMUSG00000017631/ENSMUSG00000017830/ENSMUSG00000018899/ENSMUSG00000020101/ENSMUSG00000020227/ENSMUSG00000020399/ENSMUSG00000022026/ENSMUSG00000022508/ENSMUSG00000022876/ENSMUSG00000023224/ENSMUSG00000023249/ENSMUSG00000024339/…	Loxl3/Lgals9/Stat6/Ptpn6/Hmox1/Bcr/H2-M3/Cr1l/Cd46/Abr/Dhx58/Irf1/4632428N05Rik/Irak3/Havcr2/Olfm4/Bcl6/Samsn1/Serping1/Parp3/Tap2/Anxa1/Il33/Ptprc/Nmi/Adar/A2m/Clec2d/Il4ra/Cd59a/Parp14/Grn/Tap1/Cd84/Susd4/Tgfb2/Fgl2/Tnfrsf14/Bst2/Igf2/Gpx1/H2-T23/Cd59b/Nlrc5	44
GO	MF	GO:0022839	ion gated channel activity	80/2478	313/17092	1.55325e-07	1.64644e-05	ENSMUSG00000000263/ENSMUSG00000001985/ENSMUSG00000001986/ENSMUSG00000003352/ENSMUSG00000003378/ENSMUSG00000004113/ENSMUSG00000004319/ENSMUSG00000007041/ENSMUSG00000007653/ENSMUSG00000009292/ENSMUSG00000010066/ENSMUSG00000010803/ENSMUSG00000015340/ENSMUSG00000015968/ENSMUSG00000016346/ENSMUSG00000017412/ENSMUSG00000018340/ENSMUSG00000020436/ENSMUSG00000020524/ENSMUSG00000020704/ENSMUSG00000020723/…	Glra1/Grik3/Gria3/Cacnb3/Grik5/Cacna1b/Clcn3/Clic1/Gabrb2/Trpm2/Cacna2d2/Gabra1/Cybb/Cacna1d/Kcnq2/Cacnb4/Anxa6/Gabrg2/Gria1/Asic2/Cacng4/Cacna1g/Ryr2/Jph4/Grik1/Clic6/Asic1/Scn8a/Cacna1h/Jph3/Gria4/Tmem63a/Grin1/Lrrc26/Itgav/Kcnab1/Clca3/Kcnq4/P2rx7/P2rx4/Itpr1/Erc1/Ano1/Rasa3/Htr3a/Gabrb3/Gria2/Kcnk1/Kcnh5/Pkd2/Cacna1a/Ttyh2/Scn7a/Chrnb4/Kcnc2/Ttyh3/Kcnj9/Cacng5/Kcnd3/Jph1/Kcnj10/Kcng4/Kcna5/Ma…	80
GO	MF	GO:0003779	actin binding	101/2478	424/17092	1.71359e-07	1.65128e-05	ENSMUSG00000000915/ENSMUSG00000001020/ENSMUSG00000009073/ENSMUSG00000009687/ENSMUSG00000011148/ENSMUSG00000016382/ENSMUSG00000017774/ENSMUSG00000018340/ENSMUSG00000018387/ENSMUSG00000019820/ENSMUSG00000019823/ENSMUSG00000020122/ENSMUSG00000020173/ENSMUSG00000020388/ENSMUSG00000020437/ENSMUSG00000021057/ENSMUSG00000021262/ENSMUSG00000021998/ENSMUSG00000022178/ENSMUSG00000022272/ENSMUSG00000022438/…	Hip1r/S100a4/Nf2/Fxyd5/Adssl1/Pls3/Myo1c/Anxa6/Shroom1/Utrn/Mical1/Egfr/Cobl/Pdlim4/Myo1g/Akap5/Evl/Lcp1/Ajuba/Myo10/Parvb/Myh9/Twf1/Shank3/Epb4.1l3/Myo1f/Aif1/Flnb/Homer2/Myo5b/Tnnt2/Ermn/Neb/Map1a/Phactr3/Epb4.1l1/Pfn2/Tpm3/Tmod1/Cap1/Hpca/Ablim2/Arpc3/Fscn1/Arpc1b/Add2/Vasp/Cyfip1/Myh14/Parva/Was/Msn/Ophn1/Flna/Klhl2/Pdlim3/Tpm4/Tmod2/Myo1e/Inppl1/Triobp/Mtss1l/Diap2/Ssh3/Dbn1/Myo1d/Pawr/Pknox…	101
GO	CC	GO:0048787	presynaptic active zone membrane	17/2474	35/17165	1.5976e-06	1.66749e-05	ENSMUSG00000015968/ENSMUSG00000017167/ENSMUSG00000019943/ENSMUSG00000024109/ENSMUSG00000024304/ENSMUSG00000024897/ENSMUSG00000026463/ENSMUSG00000030302/ENSMUSG00000031517/ENSMUSG00000032012/ENSMUSG00000034656/ENSMUSG00000036957/ENSMUSG00000038665/ENSMUSG00000039714/ENSMUSG00000056755/ENSMUSG00000061981/ENSMUSG00000068923	Cacna1d/Cntnap1/Atp2b1/Nrxn1/Cdh2/Apba1/Atp2b4/Atp2b2/Gpm6a/Pvrl1/Cacna1a/Lrfn3/Dgki/Cplx3/Grm7/Flot2/Syt11	17
GO	BP	GO:1903829	positive regulation of cellular protein localization	73/2453	289/17047	6.49072e-07	1.68912e-05	ENSMUSG00000000120/ENSMUSG00000001507/ENSMUSG00000001761/ENSMUSG00000002083/ENSMUSG00000002633/ENSMUSG00000003352/ENSMUSG00000004056/ENSMUSG00000006445/ENSMUSG00000006699/ENSMUSG00000013921/ENSMUSG00000014077/ENSMUSG00000014303/ENSMUSG00000015837/ENSMUSG00000016150/ENSMUSG00000017400/ENSMUSG00000017412/ENSMUSG00000017774/ENSMUSG00000019843/ENSMUSG00000020122/ENSMUSG00000020580/ENSMUSG00000021057/…	Ngfr/Itga3/Smo/Bbc3/Shh/Cacnb3/Akt2/Epha2/Cdc42/Clip3/Chp1/Glis2/Sqstm1/Tenm1/Stac2/Cacnb4/Myo1c/Fyn/Egfr/Rock2/Akap5/Gli3/Parp9/Vegfa/Trem2/Nrxn1/Trim8/Rab29/Parp1/Sec16b/Stom/Map1a/Src/Fbxw7/Asph/Ephb2/Hpca/Ptn/Fam115c/Grip2/Camk1/Tyrobp/Ipo5/Bag3/Msn/Flna/Necab2/Snx33/Chrm1/Prr5l/Acsl3/Card10/Lif/BC018507/Fam115a/Cd81/Ppp1r9b/Tgfb2/Lrp1/Sorl1/Pls1/Dtx3l/Lgals3/Gpd1l/Cfl1/Gnai1/Fcer1g/Dpp6/Erbb…	73
GO	BP	GO:0007249	I-kappaB kinase/NF-kappaB signaling	55/2453	198/17047	6.54864e-07	1.68912e-05	ENSMUSG00000000266/ENSMUSG00000000275/ENSMUSG00000001020/ENSMUSG00000002983/ENSMUSG00000008305/ENSMUSG00000015837/ENSMUSG00000018899/ENSMUSG00000019843/ENSMUSG00000020580/ENSMUSG00000020941/ENSMUSG00000022026/ENSMUSG00000022178/ENSMUSG00000022500/ENSMUSG00000024927/ENSMUSG00000025034/ENSMUSG00000025888/ENSMUSG00000026029/ENSMUSG00000026031/ENSMUSG00000026104/ENSMUSG00000026637/ENSMUSG00000026883/…	Mid2/Trim25/S100a4/Relb/Tle1/Sqstm1/Irf1/Fyn/Rock2/Map3k14/Olfm4/Ajuba/Litaf/Rela/Trim8/Casp1/Casp8/Cflar/Stat1/Traf5/Dab2ip/Tlr2/Hdac1/Rhoh/Zc3hav1/Erc1/Ltbr/Tnfrsf1a/Flna/Irak1/Tlr3/Cx3cl1/Tradd/Tirap/Myd88/Otud7a/Eda2r/Tgm2/Nod1/Tlr4/Trim62/Tlr7/Prkce/Tifa/Rnf31/Nr1h4/Tifab/Trim32/Cx3cr1/Prkcb/Bcl3/Tnip2/Irak4/Irak2/Capn3	55
GO	BP	GO:0034329	cell junction assembly	55/2453	198/17047	6.54864e-07	1.68912e-05	ENSMUSG00000000957/ENSMUSG00000001672/ENSMUSG00000001847/ENSMUSG00000002233/ENSMUSG00000006445/ENSMUSG00000006699/ENSMUSG00000007655/ENSMUSG00000009681/ENSMUSG00000015533/ENSMUSG00000017167/ENSMUSG00000017774/ENSMUSG00000020580/ENSMUSG00000020758/ENSMUSG00000021782/ENSMUSG00000022178/ENSMUSG00000022425/ENSMUSG00000022475/ENSMUSG00000023951/ENSMUSG00000024044/ENSMUSG00000024304/ENSMUSG00000025064/…	Mmp14/Marveld3/Rac1/Rhoc/Epha2/Cdc42/Cav1/Bcr/Itga2/Cntnap1/Myo1c/Rock2/Itgb4/Dlg5/Ajuba/Enpp2/Hdac7/Vegfa/Epb4.1l3/Cdh2/Col17a1/Ptprj/Nrp1/Fn1/Cdh7/Itgav/Src/Rab13/Fscn1/Ptpro/Cd9/Cttn/Ophn1/Gpm6b/Arhgap6/Cdh11/Cdh13/Agt/Smad3/Ctnnd1/Gjc1/Cdh8/Micall2/Fermt2/Limch1/Lrp1/S100a10/Nr1h4/Cdh20/Cfl1/Cdh24/Flot1/Cdh3/Kdr/Zfp703	55
GO	BP	GO:0051250	negative regulation of lymphocyte activation	42/2453	136/17047	6.56909e-07	1.68912e-05	ENSMUSG00000000693/ENSMUSG00000001123/ENSMUSG00000002602/ENSMUSG00000002633/ENSMUSG00000004266/ENSMUSG00000010142/ENSMUSG00000014361/ENSMUSG00000016206/ENSMUSG00000016496/ENSMUSG00000018899/ENSMUSG00000020101/ENSMUSG00000020399/ENSMUSG00000020612/ENSMUSG00000021318/ENSMUSG00000021782/ENSMUSG00000021835/ENSMUSG00000022508/ENSMUSG00000022876/ENSMUSG00000022901/ENSMUSG00000023249/ENSMUSG00000023915/…	Loxl3/Lgals9/Axl/Shh/Ptpn6/Tnfrsf13b/Mertk/H2-M3/Cd274/Irf1/4632428N05Rik/Havcr2/Prkar1a/Gli3/Dlg5/Bmp4/Bcl6/Samsn1/Cd86/Parp3/Tnfrsf21/Anxa1/Fas/Gal/Pag1/Dtx1/Lag3/Tyrobp/Il4ra/Casp3/Pawr/Cd276/H2-Aa/Fgl2/Lyn/Tnfrsf14/Cd24a/Zfp608/Cebpb/Erbb2/H2-Ab1/Nrarp	42
GO	BP	GO:0042116	macrophage activation	30/2453	83/17047	6.57323e-07	1.68912e-05	ENSMUSG00000001123/ENSMUSG00000020399/ENSMUSG00000021457/ENSMUSG00000022037/ENSMUSG00000022965/ENSMUSG00000023992/ENSMUSG00000024397/ENSMUSG00000024810/ENSMUSG00000025888/ENSMUSG00000027995/ENSMUSG00000028635/ENSMUSG00000030560/ENSMUSG00000030579/ENSMUSG00000030748/ENSMUSG00000031639/ENSMUSG00000031778/ENSMUSG00000034957/ENSMUSG00000035673/ENSMUSG00000036887/ENSMUSG00000039005/ENSMUSG00000040152/…	Lgals9/Havcr2/Syk/Clu/Ifngr2/Trem2/Aif1/Il33/Casp1/Tlr2/Edn2/Ctsc/Tyrobp/Il4ra/Tlr3/Cx3cl1/Cebpa/Sbno2/C1qa/Tlr4/Thbs1/Tlr7/Prkce/C5ar1/Cx3cr1/Jun/Fam19a3/Tnip2/Hmgb1/Cst7	30
GO	BP	GO:0048678	response to axon injury	30/2453	83/17047	6.57323e-07	1.68912e-05	ENSMUSG00000002633/ENSMUSG00000015829/ENSMUSG00000020393/ENSMUSG00000021877/ENSMUSG00000024397/ENSMUSG00000026235/ENSMUSG00000028072/ENSMUSG00000029470/ENSMUSG00000029838/ENSMUSG00000030579/ENSMUSG00000031990/ENSMUSG00000033295/ENSMUSG00000036353/ENSMUSG00000037225/ENSMUSG00000039952/ENSMUSG00000040249/ENSMUSG00000041736/ENSMUSG00000042105/ENSMUSG00000042228/ENSMUSG00000042258/ENSMUSG00000042834/…	Shh/Tnr/Kremen1/Arf4/Aif1/Epha4/Ntrk1/P2rx4/Ptn/Tyrobp/Jam3/Ptprf/P2ry12/Fgf2/Dag1/Lrp1/Tspo/Inpp5f/Lyn/Isl1/Nrep/Rtn4rl1/Rtn4rl2/Flrt3/Jun/Lamb2/Erbb2/Stk24/Lgals1/Rgma	30
GO	BP	GO:0034446	substrate adhesion-dependent cell spreading	33/2453	96/17047	7.01829e-07	1.78946e-05	ENSMUSG00000001847/ENSMUSG00000002602/ENSMUSG00000005958/ENSMUSG00000006699/ENSMUSG00000014361/ENSMUSG00000015647/ENSMUSG00000020019/ENSMUSG00000022026/ENSMUSG00000022425/ENSMUSG00000022438/ENSMUSG00000022780/ENSMUSG00000022885/ENSMUSG00000024965/ENSMUSG00000025810/ENSMUSG00000026193/ENSMUSG00000027009/ENSMUSG00000027087/ENSMUSG00000027646/ENSMUSG00000027954/ENSMUSG00000028583/ENSMUSG00000030770/…	Rac1/Axl/Ephb3/Cdc42/Mertk/Lama5/Ntn4/Olfm4/Enpp2/Parvb/Mfi2/St6gal1/Fermt3/Nrp1/Fn1/Itga4/Itgav/Src/Efna1/Pdpn/Parva/Flna/Triobp/Dbn1/Micall2/Fermt2/Srcin1/Prex1/Fzd7/Kif14/S100a10/Lamb2/Dock1	33
GO	BP	GO:0098698	postsynaptic specialization assembly	15/2453	27/17047	7.02399e-07	1.78946e-05	ENSMUSG00000022623/ENSMUSG00000024109/ENSMUSG00000025656/ENSMUSG00000028399/ENSMUSG00000031302/ENSMUSG00000033768/ENSMUSG00000037541/ENSMUSG00000038738/ENSMUSG00000042453/ENSMUSG00000042700/ENSMUSG00000047085/ENSMUSG00000060780/ENSMUSG00000063887/ENSMUSG00000071424/ENSMUSG00000071862	Shank3/Nrxn1/Arhgef9/Ptprd/Nlgn3/Nrxn2/Shank2/Shank1/Reln/Sipa1l1/Lrrc4b/Lrrtm1/Nlgn1/Grid2/Lrrtm2	15
GO	BP	GO:0001649	osteoblast differentiation	51/2453	179/17047	7.16549e-07	1.81771e-05	ENSMUSG00000000982/ENSMUSG00000001750/ENSMUSG00000001761/ENSMUSG00000002633/ENSMUSG00000006445/ENSMUSG00000006958/ENSMUSG00000007041/ENSMUSG00000019773/ENSMUSG00000021318/ENSMUSG00000021451/ENSMUSG00000021756/ENSMUSG00000021835/ENSMUSG00000022475/ENSMUSG00000023087/ENSMUSG00000023328/ENSMUSG00000023951/ENSMUSG00000024176/ENSMUSG00000024913/ENSMUSG00000025239/ENSMUSG00000025491/ENSMUSG00000026836/…	Ccl3/Tcirg1/Smo/Shh/Epha2/Chrd/Clic1/Fbxo5/Gli3/Sema4d/Il6st/Bmp4/Hdac7/Ccrn4l/Ache/Vegfa/Sox8/Lrp5/Limd1/Ifitm1/Acvr1/Notch1/Rassf2/Wwtr1/Adar/Lmna/Cyr61/Rest/Areg/Clec5a/Fgfr1/Smad1/Smad3/Pth1r/Cebpa/Cd276/Fgf2/Sh3pxd2b/Tmem64/Igf2/Cited1/Bmpr1b/Junb/Tmem119/Cebpb/H3f3a/Acvr2b/Jund/Cebpd/Ifi204/Sox2	51
GO	BP	GO:0002706	regulation of lymphocyte mediated immunity	47/2453	160/17047	7.41871e-07	1.87394e-05	ENSMUSG00000001123/ENSMUSG00000002147/ENSMUSG00000004266/ENSMUSG00000015947/ENSMUSG00000016206/ENSMUSG00000019998/ENSMUSG00000020101/ENSMUSG00000020399/ENSMUSG00000020641/ENSMUSG00000020919/ENSMUSG00000022378/ENSMUSG00000022508/ENSMUSG00000023249/ENSMUSG00000024164/ENSMUSG00000024339/ENSMUSG00000026072/ENSMUSG00000026395/ENSMUSG00000027347/ENSMUSG00000027718/ENSMUSG00000028599/ENSMUSG00000029468/…	Lgals9/Stat6/Ptpn6/Fcgr1/H2-M3/Stx7/4632428N05Rik/Havcr2/Rsad2/Stat5b/Fam49b/Bcl6/Parp3/C3/Tap2/Il1r1/Ptprc/Rasgrp1/Il21/Tnfrsf1b/P2rx7/Lag3/Clec2d/Sash3/Was/Vav1/H2-Q4/Tap1/Arid5a/Cd81/Susd4/Pvr/Clcf1/Mill2/Cd24a/Igf2/H2-T22/Fcer1g/H2-Q7/B2m/H2-K1/Pvrl2/Hmgb1/H2-T23/H2-Q6/H2-D1/H60b	47
GO	BP	GO:0106027	neuron projection organization	32/2453	92/17047	7.63243e-07	1.91975e-05	ENSMUSG00000001507/ENSMUSG00000002489/ENSMUSG00000002985/ENSMUSG00000005958/ENSMUSG00000006699/ENSMUSG00000019843/ENSMUSG00000022623/ENSMUSG00000026235/ENSMUSG00000026959/ENSMUSG00000027254/ENSMUSG00000027954/ENSMUSG00000028613/ENSMUSG00000028664/ENSMUSG00000029245/ENSMUSG00000030309/ENSMUSG00000031078/ENSMUSG00000031302/ENSMUSG00000033389/ENSMUSG00000034675/ENSMUSG00000035064/ENSMUSG00000035168/…	Itga3/Tiam1/Apoe/Ephb3/Cdc42/Fyn/Shank3/Epha4/Grin1/Map1a/Efna1/Lrp8/Ephb2/Epha5/Caprin2/Cttn/Nlgn3/Arhgap44/Dbn1/Eef2k/Tanc1/Shank2/Zfp365/Srcin1/Shank1/Reln/Cux2/Sipa1l1/Cfl1/Camk2b/Nlgn1/Zfp804a	32
GO	CC	GO:1902495	transmembrane transporter complex	74/2474	302/17165	1.9947e-06	2.04994e-05	ENSMUSG00000000263/ENSMUSG00000000881/ENSMUSG00000001985/ENSMUSG00000001986/ENSMUSG00000003352/ENSMUSG00000003378/ENSMUSG00000004113/ENSMUSG00000007041/ENSMUSG00000007653/ENSMUSG00000007783/ENSMUSG00000010066/ENSMUSG00000010803/ENSMUSG00000015968/ENSMUSG00000016346/ENSMUSG00000017412/ENSMUSG00000020436/ENSMUSG00000020524/ENSMUSG00000020723/ENSMUSG00000020866/ENSMUSG00000021313/ENSMUSG00000021973/…	Glra1/Dlg3/Grik3/Gria3/Cacnb3/Grik5/Cacna1b/Clic1/Gabrb2/Cpt1c/Cacna2d2/Gabra1/Cacna1d/Kcnq2/Cacnb4/Gabrg2/Gria1/Cacng4/Cacna1g/Ryr2/Micu2/Shisa9/Shank3/Clic6/Scn8a/Cacna1h/Gria4/Olfm1/Grin1/Lrrc26/Kcnab1/Pde4b/Kcnq4/Slc9a1/Ano1/Cttn/Herpud1/Olfm2/Htr3a/Pkd1/Atp1a1/Gabrb3/Kcnk1/Pkd2/Cacna1a/Ttyh2/Scn7a/Chrnb4/Kcnc2/Ttyh3/Fxyd1/Shank2/Nos1ap/Shank1/Cntnap2/Cacng5/Kcnd3/Dlgap3/Kcng4/Kcna5/Kcna1/Ami…	74
GO	BP	GO:0050727	regulation of inflammatory response	78/2453	317/17047	8.37392e-07	2.09737e-05	ENSMUSG00000000753/ENSMUSG00000000982/ENSMUSG00000001123/ENSMUSG00000002897/ENSMUSG00000002985/ENSMUSG00000006345/ENSMUSG00000009681/ENSMUSG00000015533/ENSMUSG00000015947/ENSMUSG00000016481/ENSMUSG00000016493/ENSMUSG00000017631/ENSMUSG00000020122/ENSMUSG00000020573/ENSMUSG00000020919/ENSMUSG00000022508/ENSMUSG00000023088/ENSMUSG00000023224/ENSMUSG00000023992/ENSMUSG00000024164/ENSMUSG00000024349/…	Serpinf1/Ccl3/Lgals9/Il17ra/Apoe/Ggt1/Bcr/Itga2/Fcgr1/Cr1l/Cd46/Abr/Egfr/Pik3cg/Stat5b/Bcl6/Abcc1/Serping1/Trem2/C3/Tmem173/Anxa1/Il33/Rela/Pik3ap1/Casp1/Il1r1/Cfh/Tlr2/Nfkb1/Tnfrsf1b/Zyx/Usp18/A2m/Tnfrsf1a/Ctsc/Nupr1/Slit2/Tlr3/Cx3cl1/Tradd/Ets1/Smad3/Myd88/Cd59a/Grn/Cebpa/Nfkbiz/Sbno2/Cd276/C1qa/Cd81/Tgm2/Fndc4/Susd4/Ctss/Tlr4/Clcf1/Lyn/Isl1/Adora1/Zfp36/Krt1/Cd24a/Nr1h4/C5ar1/Cx3cr1/Socs3/Tnfa…	78
GO	MF	GO:0022838	substrate-specific channel activity	96/2478	400/17092	2.38282e-07	2.10482e-05	ENSMUSG00000000197/ENSMUSG00000000263/ENSMUSG00000001985/ENSMUSG00000001986/ENSMUSG00000003352/ENSMUSG00000003378/ENSMUSG00000004113/ENSMUSG00000004319/ENSMUSG00000007041/ENSMUSG00000007653/ENSMUSG00000009292/ENSMUSG00000010066/ENSMUSG00000010803/ENSMUSG00000015968/ENSMUSG00000016346/ENSMUSG00000017412/ENSMUSG00000018340/ENSMUSG00000018862/ENSMUSG00000020142/ENSMUSG00000020436/ENSMUSG00000020524/…	Nalcn/Glra1/Grik3/Gria3/Cacnb3/Grik5/Cacna1b/Clcn3/Clic1/Gabrb2/Trpm2/Cacna2d2/Gabra1/Cacna1d/Kcnq2/Cacnb4/Anxa6/Otop3/Slc1a4/Gabrg2/Gria1/Asic2/Cacng4/Cacna1g/Ryr2/Jph4/Grik1/Clic6/Asic1/Scn8a/Cacna1h/Aqp4/Jph3/Gria4/Tmem63a/Grin1/Lrrc26/Itgav/Kcnab1/Clca3/Kcnq4/P2rx7/P2rx4/Itpr1/Erc1/Trpm1/Ano1/Rasa3/Gpm6a/Htr3a/Pkd1/Gabrb3/Gria2/Kcnk1/Kcnh5/Pkd2/Gjc1/Cacna1a/Ttyh2/Scn7a/Chrnb4/Kcnc2/Ttyh3/Slc2…	96
GO	BP	GO:0051283	negative regulation of sequestering of calcium ion	40/2453	128/17047	8.56157e-07	2.13536e-05	ENSMUSG00000000409/ENSMUSG00000000982/ENSMUSG00000002083/ENSMUSG00000003161/ENSMUSG00000004266/ENSMUSG00000006519/ENSMUSG00000006930/ENSMUSG00000009292/ENSMUSG00000016933/ENSMUSG00000018340/ENSMUSG00000021313/ENSMUSG00000021478/ENSMUSG00000022208/ENSMUSG00000024998/ENSMUSG00000025318/ENSMUSG00000026385/ENSMUSG00000026395/ENSMUSG00000027087/ENSMUSG00000027712/ENSMUSG00000028207/ENSMUSG00000029468/…	Lck/Ccl3/Bbc3/Sri/Ptpn6/Cyba/Hap1/Trpm2/Plcg1/Anxa6/Ryr2/Drd1a/Jph4/Plce1/Jph3/Dbi/Ptprc/Itgav/Anxa5/Asph/P2rx7/Itpr1/Rasa3/Cx3cl1/Ubash3b/Slc8b1/Plcg2/Pkd2/Cxcl10/Fgf2/Tgfb2/Lyn/Jph1/Prkce/P2ry6/Sepn1/Cacna1c/Slc8a1/Capn3/Ccr5	40
GO	MF	GO:0022836	gated channel activity	81/2478	322/17092	2.67387e-07	2.18023e-05	ENSMUSG00000000263/ENSMUSG00000001985/ENSMUSG00000001986/ENSMUSG00000003352/ENSMUSG00000003378/ENSMUSG00000004113/ENSMUSG00000004319/ENSMUSG00000007041/ENSMUSG00000007653/ENSMUSG00000009292/ENSMUSG00000010066/ENSMUSG00000010803/ENSMUSG00000015340/ENSMUSG00000015968/ENSMUSG00000016346/ENSMUSG00000017412/ENSMUSG00000018340/ENSMUSG00000020436/ENSMUSG00000020524/ENSMUSG00000020704/ENSMUSG00000020723/…	Glra1/Grik3/Gria3/Cacnb3/Grik5/Cacna1b/Clcn3/Clic1/Gabrb2/Trpm2/Cacna2d2/Gabra1/Cybb/Cacna1d/Kcnq2/Cacnb4/Anxa6/Gabrg2/Gria1/Asic2/Cacng4/Cacna1g/Ryr2/Jph4/Grik1/Clic6/Asic1/Scn8a/Cacna1h/Jph3/Gria4/Tmem63a/Grin1/Lrrc26/Itgav/Kcnab1/Clca3/Kcnq4/P2rx7/P2rx4/Itpr1/Erc1/Ano1/Rasa3/Htr3a/Gabrb3/Gria2/Kcnk1/Kcnh5/Pkd2/Cacna1a/Ttyh2/Scn7a/Chrnb4/Kcnc2/Ttyh3/Kcnj9/Cacng5/Kcnd3/Jph1/Kcnj10/Kcng4/Kcna5/Ma…	81
GO	BP	GO:0030198	extracellular matrix organization	63/2453	240/17047	9.16684e-07	2.27328e-05	ENSMUSG00000000392/ENSMUSG00000000567/ENSMUSG00000000693/ENSMUSG00000000957/ENSMUSG00000003534/ENSMUSG00000005320/ENSMUSG00000006800/ENSMUSG00000013150/ENSMUSG00000015829/ENSMUSG00000016918/ENSMUSG00000019803/ENSMUSG00000019997/ENSMUSG00000020019/ENSMUSG00000020932/ENSMUSG00000021998/ENSMUSG00000022483/ENSMUSG00000022780/ENSMUSG00000023886/ENSMUSG00000024076/ENSMUSG00000024087/ENSMUSG00000024909/…	Fap/Sox9/Loxl3/Mmp14/Ddr1/Fgfr4/Sulf2/Gfod2/Tnr/Sulf1/Nr2e1/Ctgf/Ntn4/Gfap/Lcp1/Col2a1/Mfi2/Smoc2/Vit/Cyp1b1/Efemp2/Col17a1/Loxl4/Kazald1/Nfkb2/Cflar/Fn1/Col5a1/Notch1/Spint1/Col11a1/Cyr61/Pdpn/Tnfrsf1b/Fscn1/Tnfrsf1a/Gpm6b/Col4a1/Agt/Ets1/Myo1e/Thsd4/Plod2/Smad3/Nphp3/Tnxb/Scara3/Adamtsl2/Ctss/Tgfb2/Dag1/Sh3pxd2b/Flrt2/Phldb1/Ndnf/Lamb2/Bcl3/Col8a2/Col25a1/Flot1/Col23a1/Chadl/Col8a1	63
GO	BP	GO:0051090	regulation of DNA-binding transcription factor activity	88/2453	371/17047	9.21866e-07	2.27328e-05	ENSMUSG00000000266/ENSMUSG00000000275/ENSMUSG00000000290/ENSMUSG00000000562/ENSMUSG00000001761/ENSMUSG00000002633/ENSMUSG00000003161/ENSMUSG00000003283/ENSMUSG00000004040/ENSMUSG00000004535/ENSMUSG00000005413/ENSMUSG00000007655/ENSMUSG00000014077/ENSMUSG00000014303/ENSMUSG00000015968/ENSMUSG00000018909/ENSMUSG00000019947/ENSMUSG00000020227/ENSMUSG00000020230/ENSMUSG00000020399/ENSMUSG00000021457/…	Mid2/Trim25/Itgb2/Adora3/Smo/Shh/Sri/Hck/Stat3/Tax1bp1/Hmox1/Cav1/Chp1/Glis2/Cacna1d/Arrb1/Arid5b/Irak3/Prmt2/Havcr2/Syk/Erbb2ip/Clu/Hr/Vegfa/Pim1/Eif2ak2/Cyp1b1/Tmem173/Fosl1/Lrp5/Rela/Trim8/Cflar/Lrrfip1/Traf5/Dab2ip/Cat/Tlr2/Arhgef2/Ntrk1/Rwdd3/Ppap2b/Tnfrsf8/Lrp8/Epha5/Anxa4/Bhlhe40/Nupr1/Trim21/Flna/Irak1/Tlr3/Cx3cl1/Tradd/Tirap/Trib1/Myd88/Traip/Pkd1/Eda2r/Pkd2/Neurod1/Icam1/Rtkn2/Nod1/Tlr4…	88
GO	BP	GO:0002474	antigen processing and presentation of peptide antigen via MHC class I	17/2453	34/17047	9.26775e-07	2.27328e-05	ENSMUSG00000015947/ENSMUSG00000016206/ENSMUSG00000021583/ENSMUSG00000024308/ENSMUSG00000024339/ENSMUSG00000026471/ENSMUSG00000035929/ENSMUSG00000037321/ENSMUSG00000038213/ENSMUSG00000056116/ENSMUSG00000058715/ENSMUSG00000060550/ENSMUSG00000060802/ENSMUSG00000061232/ENSMUSG00000067212/ENSMUSG00000073409/ENSMUSG00000073411	Fcgr1/H2-M3/Erap1/Tapbp/Tap2/Mr1/H2-Q4/Tap1/Tapbpl/H2-T22/Fcer1g/H2-Q7/B2m/H2-K1/H2-T23/H2-Q6/H2-D1	17
GO	BP	GO:0051968	positive regulation of synaptic transmission, glutamatergic	17/2453	34/17047	9.26775e-07	2.27328e-05	ENSMUSG00000015829/ENSMUSG00000020122/ENSMUSG00000020723/ENSMUSG00000021464/ENSMUSG00000021478/ENSMUSG00000022623/ENSMUSG00000024109/ENSMUSG00000025892/ENSMUSG00000028072/ENSMUSG00000030898/ENSMUSG00000031302/ENSMUSG00000037541/ENSMUSG00000038738/ENSMUSG00000040373/ENSMUSG00000042453/ENSMUSG00000055254/ENSMUSG00000063887	Tnr/Egfr/Cacng4/Ror2/Drd1a/Shank3/Nrxn1/Gria4/Ntrk1/Cckbr/Nlgn3/Shank2/Shank1/Cacng5/Reln/Ntrk2/Nlgn1	17
GO	BP	GO:0019932	second-messenger-mediated signaling	92/2453	393/17047	9.67474e-07	2.36334e-05	ENSMUSG00000000567/ENSMUSG00000000982/ENSMUSG00000001034/ENSMUSG00000002985/ENSMUSG00000003161/ENSMUSG00000004730/ENSMUSG00000004815/ENSMUSG00000006651/ENSMUSG00000006930/ENSMUSG00000009292/ENSMUSG00000013033/ENSMUSG00000014077/ENSMUSG00000015243/ENSMUSG00000015968/ENSMUSG00000016933/ENSMUSG00000018334/ENSMUSG00000020122/ENSMUSG00000020140/ENSMUSG00000020612/ENSMUSG00000020654/ENSMUSG00000020733/…	Sox9/Ccl3/Mapk7/Apoe/Sri/Emr1/Dgkq/Aplp1/Hap1/Trpm2/Lphn1/Chp1/Abca1/Cacna1d/Plcg1/Ksr1/Egfr/Lgr5/Prkar1a/Adcy3/Slc9a3r1/Akap5/Chga/Ryr2/Syk/Drd1a/Gpr65/Mgrn1/Vegfa/Trem2/Gal/Jph3/Gpr143/Homer2/Ptprc/Atp2b4/Nr5a1/Grin1/Nfatc2/Vcam1/Gucy1b3/Ptgfr/Lphn2/Asph/Npr2/Pde4b/Edn2/Hpca/Slc9a1/Epha5/P2rx4/Exoc4/Itpr1/Calca/Mt2/Mt1/Cdh13/Pth1r/Gnai2/Nfatc1/Gucy1a3/Pkd2/Neurod1/Bai1/Cxcl10/Kcnc2/Kiss1r/P2ry1…	92
GO	BP	GO:0031341	regulation of cell killing	35/2453	106/17047	9.71789e-07	2.36416e-05	ENSMUSG00000001123/ENSMUSG00000016206/ENSMUSG00000016481/ENSMUSG00000019998/ENSMUSG00000020399/ENSMUSG00000020919/ENSMUSG00000021457/ENSMUSG00000022378/ENSMUSG00000024339/ENSMUSG00000026365/ENSMUSG00000026395/ENSMUSG00000027347/ENSMUSG00000027718/ENSMUSG00000029468/ENSMUSG00000030124/ENSMUSG00000030157/ENSMUSG00000030579/ENSMUSG00000032679/ENSMUSG00000034116/ENSMUSG00000035929/ENSMUSG00000037321/…	Lgals9/H2-M3/Cr1l/Stx7/Havcr2/Stat5b/Syk/Fam49b/Tap2/Cfh/Ptprc/Rasgrp1/Il21/P2rx7/Lag3/Clec2d/Tyrobp/Cd59a/Vav1/H2-Q4/Tap1/Pvr/Mill2/Igf2/H2-T22/H2-Q7/B2m/H2-K1/Pvrl2/H2-T23/Cd59b/H2-Q6/H2-D1/H60b/Ccr5	35
GO	BP	GO:0021537	telencephalon development	68/2453	266/17047	9.77757e-07	2.36897e-05	ENSMUSG00000000247/ENSMUSG00000001761/ENSMUSG00000001847/ENSMUSG00000002633/ENSMUSG00000005958/ENSMUSG00000008575/ENSMUSG00000009073/ENSMUSG00000015829/ENSMUSG00000017491/ENSMUSG00000019803/ENSMUSG00000020122/ENSMUSG00000021068/ENSMUSG00000021318/ENSMUSG00000021478/ENSMUSG00000021557/ENSMUSG00000021835/ENSMUSG00000022462/ENSMUSG00000022623/ENSMUSG00000022883/ENSMUSG00000024304/ENSMUSG00000024621/…	Lhx2/Smo/Rac1/Shh/Ephb3/Nfib/Nf2/Tnr/Rarb/Nr2e1/Egfr/Nin/Gli3/Drd1a/Agtpbp1/Bmp4/Slc38a2/Shank3/Robo1/Cdh2/Csf1r/Nrp1/Nrp2/Atic/Dbi/Atp2b4/Zeb2/Dab2ip/Grin1/Pax6/Dclk2/Dab1/Lrp8/Tfap2c/Ephb2/Hdac1/Epha5/Foxp2/Plxna4/Flna/Plxna3/Slit2/Fgfr1/Casp3/Kirrel3/Fez1/Neurod1/P2ry12/Gng12/Atf5/Six3/Ppp1r9b/Cntnap2/Lrp1/Kif14/Crtac1/Reln/Ccdc141/2900011O08Rik/Rtn4rl1/Kcna1/Rtn4rl2/Slc8a1/Ntrk2/Alk/Numbl/Tac…	68
GO	BP	GO:0060562	epithelial tube morphogenesis	80/2453	329/17047	1.00986e-06	2.43679e-05	ENSMUSG00000000247/ENSMUSG00000000378/ENSMUSG00000000567/ENSMUSG00000000957/ENSMUSG00000001288/ENSMUSG00000001521/ENSMUSG00000001761/ENSMUSG00000002633/ENSMUSG00000003534/ENSMUSG00000004791/ENSMUSG00000006445/ENSMUSG00000007989/ENSMUSG00000009376/ENSMUSG00000014599/ENSMUSG00000014773/ENSMUSG00000015647/ENSMUSG00000016128/ENSMUSG00000016256/ENSMUSG00000017724/ENSMUSG00000019979/ENSMUSG00000020140/…	Lhx2/Ccm2/Sox9/Mmp14/Rarg/Tulp3/Smo/Shh/Ddr1/Pgf/Epha2/Fzd3/Met/Csf1/Dll1/Lama5/Stard13/Ctsz/Etv4/Apaf1/Lgr5/Cobl/Mthfd1/Ryr2/Gli3/Dlg5/Bmp4/Shank3/Vegfa/Sox8/Lrp5/Nrp1/Rdh10/Casp8/Epha4/Vangl2/Acvr1/Zeb2/Notch1/Nckap1/Spint1/Src/Lmo4/Epha7/Tfap2c/Areg/Plxnd1/Vasp/Itgax/Tead2/Col4a1/Slit2/Casp3/Agt/Ctsh/Smad3/Tgfbr2/Nphp3/Pkd1/Ift57/Pkd2/Cxcl10/Lzts2/Prkx/Plxnb2/Dchs1/Spry1/Fgf2/Tgfb2/Dag1/Timele…	80
GO	BP	GO:0051251	positive regulation of lymphocyte activation	63/2453	241/17047	1.06953e-06	2.57035e-05	ENSMUSG00000000409/ENSMUSG00000000732/ENSMUSG00000000957/ENSMUSG00000001123/ENSMUSG00000002147/ENSMUSG00000002602/ENSMUSG00000002633/ENSMUSG00000007655/ENSMUSG00000007817/ENSMUSG00000016206/ENSMUSG00000016493/ENSMUSG00000016496/ENSMUSG00000018899/ENSMUSG00000019982/ENSMUSG00000020101/ENSMUSG00000020399/ENSMUSG00000020919/ENSMUSG00000021318/ENSMUSG00000021457/ENSMUSG00000021686/ENSMUSG00000021756/…	Lck/Icosl/Mmp14/Lgals9/Stat6/Axl/Shh/Cav1/Zmiz1/H2-M3/Cd46/Cd274/Irf1/Myb/4632428N05Rik/Havcr2/Stat5b/Gli3/Syk/Ap3b1/Il6st/Fam49b/Nckap1l/Bcl6/Cd86/Il15ra/Aif1/Anxa1/Ptprc/Rasgrp1/Nfatc2/Il21/Il6ra/Vcam1/Cd38/Tyrobp/Il4ra/Sash3/Efnb1/Tgfbr2/Nck1/Myd88/Vav3/Nfkbiz/Tnfsf9/Cd276/H2-Aa/Cd81/Tlr4/Clcf1/Tox/Tnfrsf14/Cd24a/Ccdc88b/Igf2/Rasal3/Cd47/Tnip2/Flot2/H2-T23/Lgals1/Cd59b/H2-Ab1	63
GO	BP	GO:0007204	positive regulation of cytosolic calcium ion concentration	78/2453	319/17047	1.09003e-06	2.60904e-05	ENSMUSG00000000409/ENSMUSG00000000682/ENSMUSG00000000982/ENSMUSG00000002083/ENSMUSG00000003161/ENSMUSG00000003352/ENSMUSG00000004113/ENSMUSG00000004266/ENSMUSG00000006519/ENSMUSG00000006930/ENSMUSG00000007655/ENSMUSG00000009292/ENSMUSG00000010660/ENSMUSG00000015968/ENSMUSG00000016933/ENSMUSG00000017412/ENSMUSG00000019843/ENSMUSG00000020573/ENSMUSG00000020866/ENSMUSG00000021057/ENSMUSG00000021313/…	Lck/Cd52/Ccl3/Bbc3/Sri/Cacnb3/Cacna1b/Ptpn6/Cyba/Hap1/Cav1/Trpm2/Plcd1/Cacna1d/Plcg1/Cacnb4/Fyn/Pik3cg/Cacna1g/Akap5/Ryr2/Drd1a/Bmp4/Jph4/Npff/Plce1/Jph3/Dbi/Ptprc/Grin1/Itgav/Ptgfr/Asph/Edn2/Cd38/P2rx7/P2rx4/Itpr1/Erc1/Trpm1/Cckbr/Rasa3/Cx3cl1/Agt/Ubash3b/Pth1r/Slc8b1/Pkd1/Plcg2/Pkd2/Cacna1a/Gna15/Cxcl10/Pawr/Fgf2/Tgm2/Tgfb2/Lrp1/C3ar1/Cmklr1/Lyn/Jph1/Synpo/Prkce/Cd24a/Gpr157/P2ry6/C5ar1/Mchr1/S…	78
GO	BP	GO:0002699	positive regulation of immune effector process	58/2453	216/17047	1.11092e-06	2.64837e-05	ENSMUSG00000002147/ENSMUSG00000004626/ENSMUSG00000005413/ENSMUSG00000015947/ENSMUSG00000016206/ENSMUSG00000016493/ENSMUSG00000017830/ENSMUSG00000018899/ENSMUSG00000019982/ENSMUSG00000019998/ENSMUSG00000020641/ENSMUSG00000020828/ENSMUSG00000020919/ENSMUSG00000021457/ENSMUSG00000022378/ENSMUSG00000024164/ENSMUSG00000024339/ENSMUSG00000024659/ENSMUSG00000024810/ENSMUSG00000026072/ENSMUSG00000026395/…	Stat6/Stxbp2/Hmox1/Fcgr1/H2-M3/Cd46/Dhx58/Irf1/Myb/Stx7/Rsad2/Pld2/Stat5b/Syk/Fam49b/C3/Tap2/Anxa1/Il33/Il1r1/Ptprc/Rasgrp1/Il21/Fgr/P2rx7/Zc3hav1/Lag3/Il4ra/Cd37/Sash3/Rac2/Vav1/Nfkbiz/H2-Q4/Hk1/Arid5a/Cd81/Ddx60/Cd84/Tlr4/Ddx58/Pvr/Clcf1/Mill2/Lyn/Tnfrsf14/Cd24a/H2-T22/Fcer1g/H2-Q7/B2m/H2-K1/Pvrl2/Mapk3/H2-T23/H2-Q6/H2-D1/H60b	58
GO	CC	GO:0019898	extrinsic component of membrane	73/2474	299/17165	2.68714e-06	2.71971e-05	ENSMUSG00000000001/ENSMUSG00000000409/ENSMUSG00000001025/ENSMUSG00000001847/ENSMUSG00000002489/ENSMUSG00000002985/ENSMUSG00000003283/ENSMUSG00000010086/ENSMUSG00000015950/ENSMUSG00000016763/ENSMUSG00000017400/ENSMUSG00000018001/ENSMUSG00000019843/ENSMUSG00000020027/ENSMUSG00000020135/ENSMUSG00000020573/ENSMUSG00000020901/ENSMUSG00000020986/ENSMUSG00000021219/ENSMUSG00000021313/ENSMUSG00000022620/…	Gnai3/Lck/S100a6/Rac1/Tiam1/Apoe/Hck/Rnf112/Ncf1/Scube1/Stac2/Cyth3/Fyn/Socs2/Apc2/Pik3cg/Pik3r5/Sec23a/Rgs6/Ryr2/Arsa/Shank3/Gnb3/Dtna/Cdh2/Anxa1/Gna14/Farp1/Serpine2/Cdh7/Pik3c2b/Coq4/Olfm1/Mal/Src/Kcnab1/Rab13/Hpca/Fgr/Gnb2/Nucb1/Cdh11/Gnao1/Cdh13/Olfm2/Trf/Gnai2/Snx33/Micall1/Ctnnd1/Hid1/Gna15/Vps13c/Gng12/Cdh8/Fermt2/Dgki/Picalm/Magi2/Syt15/Wipi1/S100a10/Lyn/Vps13a/Dusp18/Cdh20/Socs3/Gnai1/W…	73
GO	BP	GO:0010634	positive regulation of epithelial cell migration	41/2453	134/17047	1.16331e-06	2.76217e-05	ENSMUSG00000000567/ENSMUSG00000001507/ENSMUSG00000002633/ENSMUSG00000005413/ENSMUSG00000009376/ENSMUSG00000013076/ENSMUSG00000015305/ENSMUSG00000015533/ENSMUSG00000015839/ENSMUSG00000016933/ENSMUSG00000020580/ENSMUSG00000021701/ENSMUSG00000021835/ENSMUSG00000022425/ENSMUSG00000022475/ENSMUSG00000023886/ENSMUSG00000023951/ENSMUSG00000024486/ENSMUSG00000024659/ENSMUSG00000025810/ENSMUSG00000027646/…	Sox9/Itga3/Shh/Hmox1/Met/Amotl1/Sash1/Itga2/Nfe2l2/Plcg1/Rock2/Plk2/Bmp4/Enpp2/Hdac7/Smoc2/Vegfa/Hbegf/Anxa1/Nrp1/Src/Epb4.1l4b/Glipr2/Ppap2b/P2rx4/Gpr124/Fgfr1/Agt/Ets1/Ctsh/Tgfbr2/Fgf2/Tgfb2/Thbs1/Amot/Prkce/Rhoj/Igf2/Jun/Dock1/Kdr	41
GO	BP	GO:0090287	regulation of cellular response to growth factor stimulus	66/2453	257/17047	1.18133e-06	2.79377e-05	ENSMUSG00000001507/ENSMUSG00000005656/ENSMUSG00000006800/ENSMUSG00000006958/ENSMUSG00000007655/ENSMUSG00000014773/ENSMUSG00000016918/ENSMUSG00000017774/ENSMUSG00000019647/ENSMUSG00000020101/ENSMUSG00000021835/ENSMUSG00000022025/ENSMUSG00000022883/ENSMUSG00000023886/ENSMUSG00000023951/ENSMUSG00000024109/ENSMUSG00000024427/ENSMUSG00000024544/ENSMUSG00000025351/ENSMUSG00000026031/ENSMUSG00000026883/…	Itga3/Snx6/Sulf2/Chrd/Cav1/Dll1/Sulf1/Myo1c/Sema6a/4632428N05Rik/Bmp4/Lect1/Robo1/Smoc2/Vegfa/Nrxn1/Spry4/Ldlrad4/Cd63/Cflar/Dab2ip/Notch1/Ptpn1/Cyr61/Sdcbp/Tgfbr3/Flt1/Gdf3/Cyfip1/Chrdl1/Gpr124/Slit2/Fgfr1/Mt3/Agt/Nedd4/Neo1/Rbpms2/Smad3/Cd59a/Ptprf/Gpc1/Adamtsl2/Lrg1/Spry1/Fgf2/Snx25/Pmepa1/Thbs1/Nbl1/Nrep/Wfikkn2/Onecut2/Myof/Sorl1/Grem2/Prkcb/Tcf4/Cadm4/Gpc3/Ptp4a3/Ing2/Bcl9l/Rgma/Zfp703/Peg10	66
GO	BP	GO:1990266	neutrophil migration	33/2453	98/17047	1.19474e-06	2.81426e-05	ENSMUSG00000000982/ENSMUSG00000001847/ENSMUSG00000018927/ENSMUSG00000019122/ENSMUSG00000021457/ENSMUSG00000021702/ENSMUSG00000022488/ENSMUSG00000026072/ENSMUSG00000028525/ENSMUSG00000028635/ENSMUSG00000028859/ENSMUSG00000031558/ENSMUSG00000031778/ENSMUSG00000031990/ENSMUSG00000032508/ENSMUSG00000033220/ENSMUSG00000033721/ENSMUSG00000034116/ENSMUSG00000034855/ENSMUSG00000035352/ENSMUSG00000035776/…	Ccl3/Rac1/Ccl6/Ccl9/Syk/Thbs4/Nckap1l/Il1r1/Pde4b/Edn2/Csf3r/Slit2/Cx3cl1/Jam3/Myd88/Rac2/Vav3/Vav1/Cxcl10/Ccl12/Cd99l2/Pawr/Itga9/Tgfb2/Prex1/C3ar1/C5ar1/Lgals3/Prtn3/Fcer1g/Irak4/Mospd2/C5ar2	33
GO	BP	GO:0043062	extracellular structure organization	71/2453	283/17047	1.20348e-06	2.82367e-05	ENSMUSG00000000392/ENSMUSG00000000567/ENSMUSG00000000693/ENSMUSG00000000957/ENSMUSG00000002985/ENSMUSG00000003534/ENSMUSG00000005320/ENSMUSG00000006800/ENSMUSG00000013150/ENSMUSG00000015243/ENSMUSG00000015829/ENSMUSG00000016918/ENSMUSG00000019803/ENSMUSG00000019997/ENSMUSG00000020019/ENSMUSG00000020932/ENSMUSG00000021998/ENSMUSG00000022483/ENSMUSG00000022780/ENSMUSG00000023045/ENSMUSG00000023886/…	Fap/Sox9/Loxl3/Mmp14/Apoe/Ddr1/Fgfr4/Sulf2/Gfod2/Abca1/Tnr/Sulf1/Nr2e1/Ctgf/Ntn4/Gfap/Lcp1/Col2a1/Mfi2/Soat2/Smoc2/Vit/Cyp1b1/Efemp2/Col17a1/Loxl4/Kazald1/Nfkb2/Cflar/Fn1/Soat1/Col5a1/Notch1/Spint1/Col11a1/Cyr61/Sdcbp/Pdpn/Tnfrsf1b/Fscn1/Tnfrsf1a/Gpm6b/Col4a1/Agt/Ets1/Myo1e/Thsd4/Plod2/Smad3/Nphp3/Acsl3/Tnxb/Scara3/Lcat/Adamtsl2/Ctss/Tgfb2/Dag1/Apoc1/Sh3pxd2b/Flrt2/Phldb1/Ndnf/Lamb2/Bcl3/Col8a2/C…	71
GO	BP	GO:0007611	learning or memory	70/2453	278/17047	1.23811e-06	2.89347e-05	ENSMUSG00000000326/ENSMUSG00000000594/ENSMUSG00000000753/ENSMUSG00000001507/ENSMUSG00000002985/ENSMUSG00000005142/ENSMUSG00000015829/ENSMUSG00000018581/ENSMUSG00000019970/ENSMUSG00000020122/ENSMUSG00000020524/ENSMUSG00000020654/ENSMUSG00000021448/ENSMUSG00000021478/ENSMUSG00000021701/ENSMUSG00000021877/ENSMUSG00000022208/ENSMUSG00000022619/ENSMUSG00000022623/ENSMUSG00000023017/ENSMUSG00000024109/…	Comt/Gm2a/Serpinf1/Itga3/Apoe/Man2b1/Tnr/Dnah11/Sgk1/Egfr/Gria1/Adcy3/Shc3/Drd1a/Plk2/Arf4/Jph4/Mapk8ip2/Shank3/Asic1/Nrxn1/Syt4/Fosl1/Jph3/Casp1/Dbi/Grin1/Pax6/Map1a/Kcnab1/Ntrk1/Elavl4/Ephb2/Foxp2/Ptn/Slc6a1/Nlgn3/Ap1s2/Casp3/Agt/Tmod2/Stra6/Nrxn2/Tanc1/Shank2/Egr2/Slc24a2/Dgki/Shank1/Ppp1r9b/Picalm/Cntnap2/Rcan2/Reln/Cux2/Synpo/C1ql1/Ptgs1/Igf2/Tifab/Neto1/Cacna1c/Cx3cr1/Jun/Ntrk2/Cebpb/Grm7/B…	70
GO	BP	GO:0072073	kidney epithelium development	42/2453	139/17047	1.25194e-06	2.91431e-05	ENSMUSG00000000567/ENSMUSG00000001761/ENSMUSG00000002633/ENSMUSG00000004791/ENSMUSG00000014773/ENSMUSG00000015647/ENSMUSG00000017491/ENSMUSG00000021318/ENSMUSG00000021835/ENSMUSG00000023951/ENSMUSG00000024176/ENSMUSG00000025352/ENSMUSG00000026235/ENSMUSG00000026923/ENSMUSG00000027187/ENSMUSG00000027803/ENSMUSG00000027889/ENSMUSG00000028289/ENSMUSG00000030223/ENSMUSG00000031558/ENSMUSG00000031565/…	Sox9/Smo/Shh/Pgf/Dll1/Lama5/Rarb/Gli3/Bmp4/Vegfa/Sox8/Gdf11/Epha4/Notch1/Cat/Wwtr1/Ampd2/Epha7/Ptpro/Slit2/Fgfr1/Smad1/Agt/Kank2/Myo1e/Smad3/Pkd1/Lif/Pkd2/Lzts2/Dchs1/Spry1/Fgf2/Timeless/Magi2/Epcam/Cd24a/Cited1/Robo2/Lamb2/Yap1/Gpc3	42
GO	BP	GO:0097581	lamellipodium organization	29/2453	81/17047	1.26042e-06	2.9226e-05	ENSMUSG00000001847/ENSMUSG00000005087/ENSMUSG00000006445/ENSMUSG00000015745/ENSMUSG00000022178/ENSMUSG00000022425/ENSMUSG00000022438/ENSMUSG00000022451/ENSMUSG00000027002/ENSMUSG00000027646/ENSMUSG00000028583/ENSMUSG00000029095/ENSMUSG00000029581/ENSMUSG00000029673/ENSMUSG00000030223/ENSMUSG00000030447/ENSMUSG00000031078/ENSMUSG00000031165/ENSMUSG00000031558/ENSMUSG00000031841/ENSMUSG00000032475/…	Rac1/Cd44/Epha2/Plekho1/Ajuba/Enpp2/Parvb/Twf1/Nckap1/Src/Pdpn/Ablim2/Fscn1/Auts2/Ptpro/Cyfip1/Cttn/Was/Slit2/Cdh13/Nck1/Rac2/Vav3/Mtss1l/P2ry12/Arhgef4/2610034B18Rik/Clrn1/Cfl1	29
GO	BP	GO:0048002	antigen processing and presentation of peptide antigen	21/2453	49/17047	1.27142e-06	2.92526e-05	ENSMUSG00000015947/ENSMUSG00000016206/ENSMUSG00000021583/ENSMUSG00000023992/ENSMUSG00000024308/ENSMUSG00000024339/ENSMUSG00000026471/ENSMUSG00000035929/ENSMUSG00000036594/ENSMUSG00000037321/ENSMUSG00000038213/ENSMUSG00000038642/ENSMUSG00000056116/ENSMUSG00000058715/ENSMUSG00000060550/ENSMUSG00000060802/ENSMUSG00000061232/ENSMUSG00000067212/ENSMUSG00000073409/ENSMUSG00000073411/ENSMUSG00000073421	Fcgr1/H2-M3/Erap1/Trem2/Tapbp/Tap2/Mr1/H2-Q4/H2-Aa/Tap1/Tapbpl/Ctss/H2-T22/Fcer1g/H2-Q7/B2m/H2-K1/H2-T23/H2-Q6/H2-D1/H2-Ab1	21
GO	BP	GO:0061900	glial cell activation	21/2453	49/17047	1.27142e-06	2.92526e-05	ENSMUSG00000001761/ENSMUSG00000020122/ENSMUSG00000022037/ENSMUSG00000022965/ENSMUSG00000023992/ENSMUSG00000024397/ENSMUSG00000024810/ENSMUSG00000025888/ENSMUSG00000027995/ENSMUSG00000030560/ENSMUSG00000030579/ENSMUSG00000031639/ENSMUSG00000031778/ENSMUSG00000036887/ENSMUSG00000039005/ENSMUSG00000044583/ENSMUSG00000049130/ENSMUSG00000052336/ENSMUSG00000052684/ENSMUSG00000055865/ENSMUSG00000068129	Smo/Egfr/Clu/Ifngr2/Trem2/Aif1/Il33/Casp1/Tlr2/Ctsc/Tyrobp/Tlr3/Cx3cl1/C1qa/Tlr4/Tlr7/C5ar1/Cx3cr1/Jun/Fam19a3/Cst7	21
GO	BP	GO:1904861	excitatory synapse assembly	15/2453	28/17047	1.31133e-06	3.00543e-05	ENSMUSG00000022623/ENSMUSG00000024109/ENSMUSG00000028399/ENSMUSG00000033768/ENSMUSG00000036606/ENSMUSG00000037541/ENSMUSG00000038738/ENSMUSG00000042453/ENSMUSG00000042700/ENSMUSG00000047085/ENSMUSG00000049939/ENSMUSG00000060780/ENSMUSG00000063887/ENSMUSG00000071424/ENSMUSG00000071862	Shank3/Nrxn1/Ptprd/Nrxn2/Plxnb2/Shank2/Shank1/Reln/Sipa1l1/Lrrc4b/Lrrc4/Lrrtm1/Nlgn1/Grid2/Lrrtm2	15
GO	BP	GO:0051282	regulation of sequestering of calcium ion	40/2453	130/17047	1.33374e-06	3.04504e-05	ENSMUSG00000000409/ENSMUSG00000000982/ENSMUSG00000002083/ENSMUSG00000003161/ENSMUSG00000004266/ENSMUSG00000006519/ENSMUSG00000006930/ENSMUSG00000009292/ENSMUSG00000016933/ENSMUSG00000018340/ENSMUSG00000021313/ENSMUSG00000021478/ENSMUSG00000022208/ENSMUSG00000024998/ENSMUSG00000025318/ENSMUSG00000026385/ENSMUSG00000026395/ENSMUSG00000027087/ENSMUSG00000027712/ENSMUSG00000028207/ENSMUSG00000029468/…	Lck/Ccl3/Bbc3/Sri/Ptpn6/Cyba/Hap1/Trpm2/Plcg1/Anxa6/Ryr2/Drd1a/Jph4/Plce1/Jph3/Dbi/Ptprc/Itgav/Anxa5/Asph/P2rx7/Itpr1/Rasa3/Cx3cl1/Ubash3b/Slc8b1/Plcg2/Pkd2/Cxcl10/Fgf2/Tgfb2/Lyn/Jph1/Prkce/P2ry6/Sepn1/Cacna1c/Slc8a1/Capn3/Ccr5	40
GO	BP	GO:0001755	neural crest cell migration	22/2453	53/17047	1.37728e-06	3.13239e-05	ENSMUSG00000000627/ENSMUSG00000001227/ENSMUSG00000001761/ENSMUSG00000002633/ENSMUSG00000015647/ENSMUSG00000018340/ENSMUSG00000019647/ENSMUSG00000021451/ENSMUSG00000021835/ENSMUSG00000024176/ENSMUSG00000025207/ENSMUSG00000025810/ENSMUSG00000025969/ENSMUSG00000026193/ENSMUSG00000026836/ENSMUSG00000026872/ENSMUSG00000027168/ENSMUSG00000028780/ENSMUSG00000031217/ENSMUSG00000042258/ENSMUSG00000056201/…	Sema4f/Sema6b/Smo/Shh/Lama5/Anxa6/Sema6a/Sema4d/Bmp4/Sox8/Sema4g/Nrp1/Nrp2/Fn1/Acvr1/Zeb2/Pax6/Sema3c/Efnb1/Isl1/Cfl1/Sema3e	22
GO	BP	GO:0035637	multicellular organismal signaling	41/2453	135/17047	1.44109e-06	3.265e-05	ENSMUSG00000000263/ENSMUSG00000003161/ENSMUSG00000007655/ENSMUSG00000015533/ENSMUSG00000015829/ENSMUSG00000015968/ENSMUSG00000017167/ENSMUSG00000017412/ENSMUSG00000020524/ENSMUSG00000020598/ENSMUSG00000020723/ENSMUSG00000020866/ENSMUSG00000021313/ENSMUSG00000021478/ENSMUSG00000024065/ENSMUSG00000024112/ENSMUSG00000028854/ENSMUSG00000029470/ENSMUSG00000030739/ENSMUSG00000031328/ENSMUSG00000031980/…	Glra1/Sri/Cav1/Itga2/Tnr/Cacna1d/Cntnap1/Cacnb4/Gria1/Nrcam/Cacng4/Cacna1g/Ryr2/Drd1a/Ehd3/Cacna1h/Slc9a1/P2rx4/Myh14/Flna/Agt/Jam3/Gjc1/Cacna1a/Scn7a/Chrnb4/Pawr/Cacng5/Kcnd3/Kcna5/Kcna1/Cacna1c/Slc8a1/Dsp/Ntrk2/Grik2/Grm7/Scn3a/Dpp6/Tmem65/Ank3	41
GO	BP	GO:0033674	positive regulation of kinase activity	110/2453	496/17047	1.47629e-06	3.3298e-05	ENSMUSG00000000346/ENSMUSG00000000881/ENSMUSG00000001123/ENSMUSG00000001847/ENSMUSG00000002489/ENSMUSG00000002699/ENSMUSG00000003423/ENSMUSG00000003948/ENSMUSG00000004451/ENSMUSG00000004815/ENSMUSG00000006435/ENSMUSG00000006699/ENSMUSG00000014599/ENSMUSG00000015305/ENSMUSG00000015312/ENSMUSG00000015947/ENSMUSG00000015950/ENSMUSG00000018909/ENSMUSG00000020122/ENSMUSG00000020312/ENSMUSG00000020573/…	Dazap2/Dlg3/Lgals9/Rac1/Tiam1/Lcp2/Pih1d1/Mmd/Ralb/Dgkq/Neurl1a/Cdc42/Csf1/Sash1/Gadd45b/Fcgr1/Ncf1/Arrb1/Egfr/Shc2/Pik3cg/Pik3r5/Map3k14/Gadd45g/Syk/Ror2/Bmp4/Clu/Ajuba/Nckap1l/Mapk8ip2/Robo1/Vegfa/Fgd2/Pim1/Eif2ak2/Nrxn1/Map3k8/Csf1r/Plce1/Epha4/Ptprc/Atp2b4/Vangl2/Nek6/Zeb2/Dab2ip/Cdc25b/Rassf2/Rasgrp1/Ptpn1/Src/Il6ra/Efna1/Fbxw7/Cyr61/Lmo4/Dab1/Lrp8/Map3k6/Fgr/P2rx7/Flt1/Tgfa/Camk1/Irak1/Fgfr…	110
GO	BP	GO:1905475	regulation of protein localization to membrane	51/2453	183/17047	1.48091e-06	3.3298e-05	ENSMUSG00000000957/ENSMUSG00000001507/ENSMUSG00000002083/ENSMUSG00000003352/ENSMUSG00000004056/ENSMUSG00000006445/ENSMUSG00000013921/ENSMUSG00000014077/ENSMUSG00000015837/ENSMUSG00000017400/ENSMUSG00000017774/ENSMUSG00000019843/ENSMUSG00000019998/ENSMUSG00000020122/ENSMUSG00000021057/ENSMUSG00000021820/ENSMUSG00000022623/ENSMUSG00000023992/ENSMUSG00000024109/ENSMUSG00000024143/ENSMUSG00000024304/…	Mmp14/Itga3/Bbc3/Cacnb3/Akt2/Epha2/Clip3/Chp1/Sqstm1/Stac2/Myo1c/Fyn/Stx7/Egfr/Akap5/Camk2g/Shank3/Trem2/Nrxn1/Rhoq/Cdh2/Vamp4/Stom/Ephb2/Hpca/Ptn/Fam115c/Grip2/Gpc4/Sorbs2/Necab2/Acsl3/Arhgap44/Gpc1/Dbn1/Fam115a/Cd81/Ppp1r9b/Picalm/Dag1/Magi2/Lrp1/Pls1/Lgals3/Shisa6/Gpc3/Camk2b/Gpc6/Dpp6/Erbb2/Ank3	51
GO	CC	GO:0099091	postsynaptic specialization, intracellular component	16/2474	33/17165	3.34226e-06	3.33228e-05	ENSMUSG00000000409/ENSMUSG00000000881/ENSMUSG00000003279/ENSMUSG00000009681/ENSMUSG00000017631/ENSMUSG00000019843/ENSMUSG00000021057/ENSMUSG00000022623/ENSMUSG00000027646/ENSMUSG00000028059/ENSMUSG00000031292/ENSMUSG00000034101/ENSMUSG00000035168/ENSMUSG00000042228/ENSMUSG00000053580/ENSMUSG00000063063	Lck/Dlg3/Dlgap1/Bcr/Abr/Fyn/Akap5/Shank3/Src/Arhgef2/Cdkl5/Ctnnd1/Tanc1/Lyn/Tanc2/Ctnna2	16
GO	MF	GO:0005216	ion channel activity	93/2478	389/17092	4.40456e-07	3.33488e-05	ENSMUSG00000000197/ENSMUSG00000000263/ENSMUSG00000001985/ENSMUSG00000001986/ENSMUSG00000003352/ENSMUSG00000003378/ENSMUSG00000004113/ENSMUSG00000004319/ENSMUSG00000007041/ENSMUSG00000007653/ENSMUSG00000009292/ENSMUSG00000010066/ENSMUSG00000010803/ENSMUSG00000015968/ENSMUSG00000016346/ENSMUSG00000017412/ENSMUSG00000018340/ENSMUSG00000018862/ENSMUSG00000020142/ENSMUSG00000020436/ENSMUSG00000020524/…	Nalcn/Glra1/Grik3/Gria3/Cacnb3/Grik5/Cacna1b/Clcn3/Clic1/Gabrb2/Trpm2/Cacna2d2/Gabra1/Cacna1d/Kcnq2/Cacnb4/Anxa6/Otop3/Slc1a4/Gabrg2/Gria1/Asic2/Cacng4/Cacna1g/Ryr2/Jph4/Grik1/Clic6/Asic1/Scn8a/Cacna1h/Jph3/Gria4/Tmem63a/Grin1/Lrrc26/Itgav/Kcnab1/Clca3/Kcnq4/P2rx7/P2rx4/Itpr1/Erc1/Trpm1/Ano1/Rasa3/Gpm6a/Htr3a/Pkd1/Gabrb3/Gria2/Kcnk1/Kcnh5/Pkd2/Gjc1/Cacna1a/Ttyh2/Scn7a/Chrnb4/Kcnc2/Ttyh3/Slc24a2/K…	93
GO	BP	GO:0001774	microglial cell activation	19/2453	42/17047	1.49897e-06	3.34506e-05	ENSMUSG00000022037/ENSMUSG00000022965/ENSMUSG00000023992/ENSMUSG00000024397/ENSMUSG00000024810/ENSMUSG00000025888/ENSMUSG00000027995/ENSMUSG00000030560/ENSMUSG00000030579/ENSMUSG00000031639/ENSMUSG00000031778/ENSMUSG00000036887/ENSMUSG00000039005/ENSMUSG00000044583/ENSMUSG00000049130/ENSMUSG00000052336/ENSMUSG00000052684/ENSMUSG00000055865/ENSMUSG00000068129	Clu/Ifngr2/Trem2/Aif1/Il33/Casp1/Tlr2/Ctsc/Tyrobp/Tlr3/Cx3cl1/C1qa/Tlr4/Tlr7/C5ar1/Cx3cr1/Jun/Fam19a3/Cst7	19
GO	BP	GO:0002269	leukocyte activation involved in inflammatory response	19/2453	42/17047	1.49897e-06	3.34506e-05	ENSMUSG00000022037/ENSMUSG00000022965/ENSMUSG00000023992/ENSMUSG00000024397/ENSMUSG00000024810/ENSMUSG00000025888/ENSMUSG00000027995/ENSMUSG00000030560/ENSMUSG00000030579/ENSMUSG00000031639/ENSMUSG00000031778/ENSMUSG00000036887/ENSMUSG00000039005/ENSMUSG00000044583/ENSMUSG00000049130/ENSMUSG00000052336/ENSMUSG00000052684/ENSMUSG00000055865/ENSMUSG00000068129	Clu/Ifngr2/Trem2/Aif1/Il33/Casp1/Tlr2/Ctsc/Tyrobp/Tlr3/Cx3cl1/C1qa/Tlr4/Tlr7/C5ar1/Cx3cr1/Jun/Fam19a3/Cst7	19
GO	MF	GO:0005543	phospholipid binding	96/2478	406/17092	4.93127e-07	3.48476e-05	ENSMUSG00000000915/ENSMUSG00000001521/ENSMUSG00000002588/ENSMUSG00000002602/ENSMUSG00000002985/ENSMUSG00000004207/ENSMUSG00000004952/ENSMUSG00000005656/ENSMUSG00000010660/ENSMUSG00000015950/ENSMUSG00000017774/ENSMUSG00000018001/ENSMUSG00000018340/ENSMUSG00000019970/ENSMUSG00000020120/ENSMUSG00000020437/ENSMUSG00000020828/ENSMUSG00000021814/ENSMUSG00000022212/ENSMUSG00000022272/ENSMUSG00000022451/…	Hip1r/Tulp3/Pon1/Axl/Apoe/Psap/Rasa4/Snx6/Plcd1/Ncf1/Myo1c/Cyth3/Anxa6/Sgk1/Plek/Myo1g/Pld2/Anxa7/Cpne6/Myo10/Twf1/Gsdmd/Arl6/Trem2/Fgd2/Fam21/Syt4/Anxa1/Syt7/Apba1/Sgk3/Pik3c2b/Syt2/Mark1/Nr5a1/Dab2ip/Rasgrp1/Anxa5/Pfn2/Dapp1/Rpe65/Cpne3/Sdcbp/Dab1/Scarb2/Rab35/Dfna5/Anxa4/Itpr1/Psd3/Arfip2/Ophn1/Myo1e/Rasa2/Snx33/Inppl1/Arap1/Micall1/Arhgap44/Mtss1l/Cpne2/Bai1/Cpne7/Syt1/Zfyve28/Fermt2/Arap2/Sn…	96
GO	BP	GO:0032635	interleukin-6 production	43/2453	145/17047	1.63732e-06	3.61305e-05	ENSMUSG00000001123/ENSMUSG00000004040/ENSMUSG00000004266/ENSMUSG00000006519/ENSMUSG00000016528/ENSMUSG00000018909/ENSMUSG00000020227/ENSMUSG00000020399/ENSMUSG00000021457/ENSMUSG00000022488/ENSMUSG00000023992/ENSMUSG00000024397/ENSMUSG00000024810/ENSMUSG00000026509/ENSMUSG00000026896/ENSMUSG00000027947/ENSMUSG00000027995/ENSMUSG00000028059/ENSMUSG00000029468/ENSMUSG00000030341/ENSMUSG00000030579/…	Lgals9/Stat3/Ptpn6/Cyba/Mapkapk2/Arrb1/Irak3/Havcr2/Syk/Nckap1l/Trem2/Aif1/Il33/Capn2/Ifih1/Il6ra/Tlr2/Arhgef2/P2rx7/Tnfrsf1a/Tyrobp/Trim30a/Tlr3/Tirap/Myd88/Tnfsf9/Arid5a/Nod1/Tlr4/Ddx58/Mbp/Isl1/Tlr7/Cd24a/Nr1h4/5430435G22Rik/Cd47/Cebpb/Fcer1g/Hmgb1/Syt11/C5ar2/Ccr5	43
GO	BP	GO:0060078	regulation of postsynaptic membrane potential	43/2453	145/17047	1.63732e-06	3.61305e-05	ENSMUSG00000000263/ENSMUSG00000000632/ENSMUSG00000001985/ENSMUSG00000001986/ENSMUSG00000003352/ENSMUSG00000003378/ENSMUSG00000007653/ENSMUSG00000010803/ENSMUSG00000017314/ENSMUSG00000020436/ENSMUSG00000020524/ENSMUSG00000022619/ENSMUSG00000022623/ENSMUSG00000022790/ENSMUSG00000023052/ENSMUSG00000024109/ENSMUSG00000024268/ENSMUSG00000025892/ENSMUSG00000026959/ENSMUSG00000029468/ENSMUSG00000029470/…	Glra1/Sez6/Grik3/Gria3/Cacnb3/Grik5/Gabrb2/Gabra1/Mpp2/Gabrg2/Gria1/Mapk8ip2/Shank3/Igsf11/Npff/Nrxn1/Celf4/Gria4/Grin1/P2rx7/P2rx4/Grip2/Nlgn3/Cx3cl1/Chrm1/Gabrb3/Igsf9b/Dbn1/Chrnb4/Shank2/Dgki/Shank1/Adora1/Reln/Cux2/S1pr2/Kcna1/Neto1/Cacna1c/Grik2/Abat/Nlgn1/Grid2	43
GO	BP	GO:0097553	calcium ion transmembrane import into cytosol	43/2453	145/17047	1.63732e-06	3.61305e-05	ENSMUSG00000000409/ENSMUSG00000000982/ENSMUSG00000002083/ENSMUSG00000003161/ENSMUSG00000004266/ENSMUSG00000006519/ENSMUSG00000006930/ENSMUSG00000009292/ENSMUSG00000016933/ENSMUSG00000019843/ENSMUSG00000021313/ENSMUSG00000021478/ENSMUSG00000022208/ENSMUSG00000024998/ENSMUSG00000025318/ENSMUSG00000026385/ENSMUSG00000026395/ENSMUSG00000026959/ENSMUSG00000027087/ENSMUSG00000028207/ENSMUSG00000029468/…	Lck/Ccl3/Bbc3/Sri/Ptpn6/Cyba/Hap1/Trpm2/Plcg1/Fyn/Ryr2/Drd1a/Jph4/Plce1/Jph3/Dbi/Ptprc/Grin1/Itgav/Asph/P2rx7/Itpr1/Rasa3/Cx3cl1/Ubash3b/Slc8b1/Plcg2/Pkd2/Cxcl10/Pawr/Fgf2/Tgfb2/Lyn/Jph1/Prkce/P2ry6/Sepn1/Cacna1c/Slc8a1/Tmem28/Capn3/Fam155a/Ccr5	43
GO	BP	GO:0060485	mesenchyme development	64/2453	249/17047	1.65208e-06	3.62787e-05	ENSMUSG00000000567/ENSMUSG00000000627/ENSMUSG00000000693/ENSMUSG00000001227/ENSMUSG00000001761/ENSMUSG00000002489/ENSMUSG00000002633/ENSMUSG00000015647/ENSMUSG00000018340/ENSMUSG00000019647/ENSMUSG00000019789/ENSMUSG00000021127/ENSMUSG00000021451/ENSMUSG00000021782/ENSMUSG00000021835/ENSMUSG00000023951/ENSMUSG00000024176/ENSMUSG00000024544/ENSMUSG00000025207/ENSMUSG00000025810/ENSMUSG00000025921/…	Sox9/Sema4f/Loxl3/Sema6b/Smo/Tiam1/Shh/Lama5/Anxa6/Sema6a/Hey2/Zfp36l1/Sema4d/Dlg5/Bmp4/Vegfa/Sox8/Ldlrad4/Sema4g/Nrp1/Rdh10/Nrp2/Fn1/Vangl2/Olfm1/Acvr1/Zeb2/Dab2ip/Notch1/Nckap1/Frzb/Pax6/Wwtr1/Efna1/Adam15/Sdcbp/Glipr2/Pdpn/Sema3c/Tgfbr3/Exoc4/Tead2/Efnb1/Flna/Fgfr1/Nedd4/Smad3/Tgfbr2/Pkd2/Pawr/Dchs1/Spry1/Cul7/Tgfb2/Dag1/Trim62/Isl1/Phldb1/Yap1/Cfl1/Mapk3/Bcl9l/Sema3e/Zfp703	64
GO	BP	GO:0051208	sequestering of calcium ion	40/2453	131/17047	1.65626e-06	3.62787e-05	ENSMUSG00000000409/ENSMUSG00000000982/ENSMUSG00000002083/ENSMUSG00000003161/ENSMUSG00000004266/ENSMUSG00000006519/ENSMUSG00000006930/ENSMUSG00000009292/ENSMUSG00000016933/ENSMUSG00000018340/ENSMUSG00000021313/ENSMUSG00000021478/ENSMUSG00000022208/ENSMUSG00000024998/ENSMUSG00000025318/ENSMUSG00000026385/ENSMUSG00000026395/ENSMUSG00000027087/ENSMUSG00000027712/ENSMUSG00000028207/ENSMUSG00000029468/…	Lck/Ccl3/Bbc3/Sri/Ptpn6/Cyba/Hap1/Trpm2/Plcg1/Anxa6/Ryr2/Drd1a/Jph4/Plce1/Jph3/Dbi/Ptprc/Itgav/Anxa5/Asph/P2rx7/Itpr1/Rasa3/Cx3cl1/Ubash3b/Slc8b1/Plcg2/Pkd2/Cxcl10/Fgf2/Tgfb2/Lyn/Jph1/Prkce/P2ry6/Sepn1/Cacna1c/Slc8a1/Capn3/Ccr5	40
GO	BP	GO:0051592	response to calcium ion	44/2453	150/17047	1.72461e-06	3.751e-05	ENSMUSG00000003545/ENSMUSG00000004347/ENSMUSG00000004952/ENSMUSG00000006764/ENSMUSG00000007655/ENSMUSG00000009292/ENSMUSG00000010660/ENSMUSG00000020122/ENSMUSG00000021313/ENSMUSG00000021814/ENSMUSG00000022212/ENSMUSG00000024109/ENSMUSG00000024261/ENSMUSG00000024743/ENSMUSG00000026414/ENSMUSG00000027010/ENSMUSG00000027712/ENSMUSG00000028207/ENSMUSG00000028228/ENSMUSG00000028785/ENSMUSG00000029468/…	Fosb/Pde1c/Rasa4/Tph2/Cav1/Trpm2/Plcd1/Egfr/Ryr2/Anxa7/Cpne6/Nrxn1/Syt4/Syt7/Tnnt2/Slc25a12/Anxa5/Asph/Cpne3/Hpca/P2rx7/Slc6a1/Cpne2/Pkd2/Cpne7/Eef2k/Sec31a/Syt1/Txnip/Thbs1/Apobec1/Syt15/Syt12/Ptges/Cpne8/Jun/Junb/Syt9/Nlgn1/Syt11/Ccnd1/Jund/S100a16/Capn3	44
GO	BP	GO:0050919	negative chemotaxis	20/2453	46/17047	1.7251e-06	3.751e-05	ENSMUSG00000000627/ENSMUSG00000001227/ENSMUSG00000019647/ENSMUSG00000021451/ENSMUSG00000022883/ENSMUSG00000025207/ENSMUSG00000025969/ENSMUSG00000027087/ENSMUSG00000028289/ENSMUSG00000028780/ENSMUSG00000029765/ENSMUSG00000031398/ENSMUSG00000031558/ENSMUSG00000045287/ENSMUSG00000045776/ENSMUSG00000047414/ENSMUSG00000051379/ENSMUSG00000052516/ENSMUSG00000059921/ENSMUSG00000063531	Sema4f/Sema6b/Sema6a/Sema4d/Robo1/Sema4g/Nrp2/Itgav/Epha7/Sema3c/Plxna4/Plxna3/Slit2/Rtn4rl1/Lrtm1/Flrt2/Flrt3/Robo2/Unc5c/Sema3e	20
GO	BP	GO:0035023	regulation of Rho protein signal transduction	41/2453	136/17047	1.77952e-06	3.8552e-05	ENSMUSG00000001507/ENSMUSG00000002489/ENSMUSG00000002985/ENSMUSG00000004562/ENSMUSG00000009376/ENSMUSG00000009681/ENSMUSG00000015243/ENSMUSG00000017631/ENSMUSG00000018909/ENSMUSG00000021215/ENSMUSG00000021662/ENSMUSG00000021895/ENSMUSG00000022263/ENSMUSG00000022508/ENSMUSG00000022883/ENSMUSG00000024013/ENSMUSG00000024304/ENSMUSG00000025132/ENSMUSG00000025555/ENSMUSG00000025656/ENSMUSG00000025810/…	Itga3/Tiam1/Apoe/Arhgef40/Met/Bcr/Abca1/Abr/Arrb1/Net1/Arhgef28/Arhgef3/Trio/Bcl6/Robo1/Fgd2/Cdh2/Arhgdia/Farp1/Arhgef9/Nrp1/Arhgef2/Stmn1/Arhgef6/Ophn1/Kank2/Arhgef17/Vav3/Vav1/Arhgef4/Plekhg2/Plekhg6/Prex1/Arhgef37/Cdc42se1/Prex2/D8Ertd82e/Arhgap42/Rit2/Flot1/Arhgef10	41
GO	BP	GO:0061138	morphogenesis of a branching epithelium	52/2453	189/17047	1.78881e-06	3.86124e-05	ENSMUSG00000000567/ENSMUSG00000000957/ENSMUSG00000001761/ENSMUSG00000002633/ENSMUSG00000003534/ENSMUSG00000004791/ENSMUSG00000006445/ENSMUSG00000009376/ENSMUSG00000014599/ENSMUSG00000015647/ENSMUSG00000016256/ENSMUSG00000016918/ENSMUSG00000017724/ENSMUSG00000020019/ENSMUSG00000021318/ENSMUSG00000021782/ENSMUSG00000021835/ENSMUSG00000023951/ENSMUSG00000024176/ENSMUSG00000024913/ENSMUSG00000025810/…	Sox9/Mmp14/Smo/Shh/Ddr1/Pgf/Epha2/Met/Csf1/Lama5/Ctsz/Sulf1/Etv4/Ntn4/Gli3/Dlg5/Bmp4/Vegfa/Sox8/Lrp5/Nrp1/Rdh10/Vangl2/Acvr1/Notch1/Spint1/Src/Tfap2c/Sema3c/Areg/Plxna1/Plxnd1/Col4a1/Slit2/Fgfr1/Agt/Ctsh/Tgfbr2/Pkd1/Pkd2/Dchs1/Spry1/Fgf2/Tgm2/Dag1/Timeless/Cited1/Yap1/Socs3/Gpc3/Sema3e/Nrarp	52
GO	CC	GO:0044853	plasma membrane raft	37/2474	121/17165	4.012e-06	3.9412e-05	ENSMUSG00000001761/ENSMUSG00000002699/ENSMUSG00000003153/ENSMUSG00000003283/ENSMUSG00000005413/ENSMUSG00000007655/ENSMUSG00000020612/ENSMUSG00000020828/ENSMUSG00000021478/ENSMUSG00000024304/ENSMUSG00000027351/ENSMUSG00000027375/ENSMUSG00000027646/ENSMUSG00000028613/ENSMUSG00000030000/ENSMUSG00000031841/ENSMUSG00000032440/ENSMUSG00000033161/ENSMUSG00000034101/ENSMUSG00000034845/ENSMUSG00000035441/…	Smo/Lcp2/Slc2a3/Hck/Hmox1/Cav1/Prkar1a/Pld2/Drd1a/Cdh2/Spred1/Mal/Src/Lrp8/Add2/Cdh13/Tgfbr2/Atp1a1/Ctnnd1/Plvap/Myo1d/Mlc1/P2ry12/Fxyd1/Hk1/Nos1ap/Dag1/Kcnd3/Myof/Orai1/Cacna1c/Irs1/Prtn3/Flot1/Flot2/Mapk3/Ehd2	37
GO	BP	GO:0150076	neuroinflammatory response	23/2453	58/17047	2.06928e-06	4.45046e-05	ENSMUSG00000001761/ENSMUSG00000020122/ENSMUSG00000022037/ENSMUSG00000022965/ENSMUSG00000023992/ENSMUSG00000024397/ENSMUSG00000024810/ENSMUSG00000025888/ENSMUSG00000027995/ENSMUSG00000028599/ENSMUSG00000030560/ENSMUSG00000030579/ENSMUSG00000030717/ENSMUSG00000031639/ENSMUSG00000031778/ENSMUSG00000036887/ENSMUSG00000039005/ENSMUSG00000044583/ENSMUSG00000049130/ENSMUSG00000052336/ENSMUSG00000052684/…	Smo/Egfr/Clu/Ifngr2/Trem2/Aif1/Il33/Casp1/Tlr2/Tnfrsf1b/Ctsc/Tyrobp/Nupr1/Tlr3/Cx3cl1/C1qa/Tlr4/Tlr7/C5ar1/Cx3cr1/Jun/Fam19a3/Cst7	23
GO	BP	GO:0002685	regulation of leukocyte migration	52/2453	190/17047	2.12321e-06	4.54995e-05	ENSMUSG00000000957/ENSMUSG00000000982/ENSMUSG00000001123/ENSMUSG00000001847/ENSMUSG00000004791/ENSMUSG00000009681/ENSMUSG00000014599/ENSMUSG00000015533/ENSMUSG00000017631/ENSMUSG00000021508/ENSMUSG00000021702/ENSMUSG00000022488/ENSMUSG00000023951/ENSMUSG00000023992/ENSMUSG00000024397/ENSMUSG00000024659/ENSMUSG00000024810/ENSMUSG00000026072/ENSMUSG00000027009/ENSMUSG00000028635/ENSMUSG00000029470/…	Mmp14/Ccl3/Lgals9/Rac1/Pgf/Bcr/Csf1/Itga2/Abr/Cxcl14/Thbs4/Nckap1l/Vegfa/Trem2/Aif1/Anxa1/Il33/Il1r1/Itga4/Edn2/P2rx4/Ptn/Cd9/Msn/Slit2/Cx3cl1/Jam3/Myd88/Slc8b1/Rac2/Itga2b/Plvap/Cxcl10/Ccl12/Cd99l2/Pawr/P2ry12/Icam1/Cd81/C3ar1/Nbl1/Cmklr1/Lyn/Tnfrsf14/Adora1/C5ar1/Lgals3/Mospd2/Mapk3/Ano6/Lrch1/C5ar2	52
GO	BP	GO:0030278	regulation of ossification	53/2453	195/17047	2.13661e-06	4.55923e-05	ENSMUSG00000000567/ENSMUSG00000001750/ENSMUSG00000006958/ENSMUSG00000007041/ENSMUSG00000014599/ENSMUSG00000019773/ENSMUSG00000019943/ENSMUSG00000020393/ENSMUSG00000020641/ENSMUSG00000021318/ENSMUSG00000021451/ENSMUSG00000021756/ENSMUSG00000021835/ENSMUSG00000022475/ENSMUSG00000023087/ENSMUSG00000023951/ENSMUSG00000024913/ENSMUSG00000024940/ENSMUSG00000025239/ENSMUSG00000025491/ENSMUSG00000026836/…	Sox9/Tcirg1/Chrd/Clic1/Csf1/Fbxo5/Atp2b1/Kremen1/Rsad2/Gli3/Sema4d/Il6st/Bmp4/Hdac7/Ccrn4l/Vegfa/Lrp5/Ltbp3/Limd1/Ifitm1/Acvr1/Notch1/Rassf2/Lmna/Cyr61/Rest/Areg/P2rx7/Ptn/Calca/Gpm6b/Fgfr1/Smad1/Smad3/Cebpa/Isg15/Cd276/Fgf2/Egr2/Fam101a/Tgfb2/Tmem64/Cited1/Bmpr1b/Slc8a1/Tmem119/Cebpb/Acvr2b/Mapk3/Ano6/Jund/Cebpd/Ifi204	53
GO	BP	GO:0032388	positive regulation of intracellular transport	54/2453	200/17047	2.1429e-06	4.55923e-05	ENSMUSG00000001761/ENSMUSG00000002633/ENSMUSG00000003352/ENSMUSG00000004056/ENSMUSG00000004113/ENSMUSG00000004626/ENSMUSG00000006699/ENSMUSG00000014077/ENSMUSG00000015968/ENSMUSG00000016150/ENSMUSG00000017412/ENSMUSG00000017774/ENSMUSG00000019843/ENSMUSG00000020132/ENSMUSG00000020828/ENSMUSG00000021057/ENSMUSG00000021318/ENSMUSG00000021457/ENSMUSG00000024743/ENSMUSG00000026433/ENSMUSG00000026589/…	Smo/Shh/Cacnb3/Akt2/Cacna1b/Stxbp2/Cdc42/Chp1/Cacna1d/Tenm1/Cacnb4/Myo1c/Fyn/Rab21/Pld2/Akap5/Gli3/Syk/Syt7/Rab29/Sec16b/Stom/Fbxw7/Asph/Hpca/Fgr/Fam115c/Erc1/Camk1/Ipo5/Il4ra/Bag3/Msn/Flna/Fez1/Nedd4/Chrm1/Prr5l/BC018507/Mlc1/Syt1/Fam115a/Cd81/Trim46/Sorl1/Fcer1g/Cdh3/Erbb2/Syt9/Nlgn1/Ank3/B3gat3/Ehd2/Wipf1	54
GO	CC	GO:1990351	transporter complex	74/2474	309/17165	4.87403e-06	4.71862e-05	ENSMUSG00000000263/ENSMUSG00000000881/ENSMUSG00000001985/ENSMUSG00000001986/ENSMUSG00000003352/ENSMUSG00000003378/ENSMUSG00000004113/ENSMUSG00000007041/ENSMUSG00000007653/ENSMUSG00000007783/ENSMUSG00000010066/ENSMUSG00000010803/ENSMUSG00000015968/ENSMUSG00000016346/ENSMUSG00000017412/ENSMUSG00000020436/ENSMUSG00000020524/ENSMUSG00000020723/ENSMUSG00000020866/ENSMUSG00000021313/ENSMUSG00000021973/…	Glra1/Dlg3/Grik3/Gria3/Cacnb3/Grik5/Cacna1b/Clic1/Gabrb2/Cpt1c/Cacna2d2/Gabra1/Cacna1d/Kcnq2/Cacnb4/Gabrg2/Gria1/Cacng4/Cacna1g/Ryr2/Micu2/Shisa9/Shank3/Clic6/Scn8a/Cacna1h/Gria4/Olfm1/Grin1/Lrrc26/Kcnab1/Pde4b/Kcnq4/Slc9a1/Ano1/Cttn/Herpud1/Olfm2/Htr3a/Pkd1/Atp1a1/Gabrb3/Kcnk1/Pkd2/Cacna1a/Ttyh2/Scn7a/Chrnb4/Kcnc2/Ttyh3/Fxyd1/Shank2/Nos1ap/Shank1/Cntnap2/Cacng5/Kcnd3/Dlgap3/Kcng4/Kcna5/Kcna1/Ami…	74
GO	BP	GO:0002040	sprouting angiogenesis	36/2453	114/17047	2.25825e-06	4.78162e-05	ENSMUSG00000000120/ENSMUSG00000002633/ENSMUSG00000004791/ENSMUSG00000005413/ENSMUSG00000006445/ENSMUSG00000006699/ENSMUSG00000014773/ENSMUSG00000016128/ENSMUSG00000019647/ENSMUSG00000019803/ENSMUSG00000021701/ENSMUSG00000021835/ENSMUSG00000022475/ENSMUSG00000022883/ENSMUSG00000023951/ENSMUSG00000024659/ENSMUSG00000024754/ENSMUSG00000025810/ENSMUSG00000026923/ENSMUSG00000027351/ENSMUSG00000028086/…	Ngfr/Shh/Pgf/Hmox1/Epha2/Cdc42/Dll1/Stard13/Sema6a/Nr2e1/Plk2/Bmp4/Hdac7/Robo1/Vegfa/Anxa1/Tmem2/Nrp1/Notch1/Spred1/Fbxw7/Parva/Gpr124/Slit2/Smad1/Cdh13/Card10/Fgf2/Thbs1/S100a1/Rhoj/Kdr/Sema3e/Hmgb1/Rnf213/Nrarp	36
GO	BP	GO:1904064	positive regulation of cation transmembrane transport	46/2453	161/17047	2.26354e-06	4.78162e-05	ENSMUSG00000003161/ENSMUSG00000003352/ENSMUSG00000006930/ENSMUSG00000014077/ENSMUSG00000015968/ENSMUSG00000016933/ENSMUSG00000017400/ENSMUSG00000017412/ENSMUSG00000020704/ENSMUSG00000020723/ENSMUSG00000021313/ENSMUSG00000021478/ENSMUSG00000021835/ENSMUSG00000022623/ENSMUSG00000022965/ENSMUSG00000023992/ENSMUSG00000024065/ENSMUSG00000024907/ENSMUSG00000026385/ENSMUSG00000026961/ENSMUSG00000028207/…	Sri/Cacnb3/Hap1/Chp1/Cacna1d/Plcg1/Stac2/Cacnb4/Asic2/Cacng4/Ryr2/Drd1a/Bmp4/Shank3/Ifngr2/Trem2/Ehd3/Gal/Dbi/Lrrc26/Asph/Ephb2/Slc9a1/Nlgn3/Flna/Cx3cl1/Agt/Plcg2/Pkd2/Cxcl10/Kcnc2/Fxyd1/Ctss/Reln/S100a1/Kcna1/P2ry6/Amigo1/Cacna1c/Prkg1/Cfl1/Kcnc1/Dpp6/Ano6/Ank3/Capn3	46
GO	MF	GO:0015085	calcium ion transmembrane transporter activity	41/2478	131/17092	7.33485e-07	4.85934e-05	ENSMUSG00000003352/ENSMUSG00000004113/ENSMUSG00000009292/ENSMUSG00000010066/ENSMUSG00000015968/ENSMUSG00000017412/ENSMUSG00000018340/ENSMUSG00000019943/ENSMUSG00000020723/ENSMUSG00000020866/ENSMUSG00000021313/ENSMUSG00000022208/ENSMUSG00000024112/ENSMUSG00000025318/ENSMUSG00000026463/ENSMUSG00000026959/ENSMUSG00000027087/ENSMUSG00000027712/ENSMUSG00000029470/ENSMUSG00000030102/ENSMUSG00000030172/…	Cacnb3/Cacna1b/Trpm2/Cacna2d2/Cacna1d/Cacnb4/Anxa6/Atp2b1/Cacng4/Cacna1g/Ryr2/Jph4/Cacna1h/Jph3/Atp2b4/Grin1/Itgav/Anxa5/P2rx4/Itpr1/Erc1/Atp2b2/Trpm1/Rasa3/Gpm6a/Slc8b1/Pkd1/Pkd2/Cacna1a/Slc24a2/Cacng5/Jph1/Marcksl1/Orai1/Cacna1c/Tmco1/Slc8a1/Grm7/Slc24a3/Tmem28/Fam155a	41
GO	BP	GO:0035458	cellular response to interferon-beta	19/2453	43/17047	2.32436e-06	4.88823e-05	ENSMUSG00000018899/ENSMUSG00000024349/ENSMUSG00000026104/ENSMUSG00000026509/ENSMUSG00000028268/ENSMUSG00000028270/ENSMUSG00000031639/ENSMUSG00000034459/ENSMUSG00000037849/ENSMUSG00000043263/ENSMUSG00000046879/ENSMUSG00000054072/ENSMUSG00000069874/ENSMUSG00000073489/ENSMUSG00000073490/ENSMUSG00000073555/ENSMUSG00000074896/ENSMUSG00000078853/ENSMUSG00000078920	Irf1/Tmem173/Stat1/Capn2/Gbp3/Gbp2/Tlr3/Ifit1/Gm4955/Pyhin1/Irgm1/Iigp1/Irgm2/Ifi204/AI607873/Gm4951/Ifit3/Igtp/Ifi47	19
GO	BP	GO:1903706	regulation of hemopoiesis	86/2453	368/17047	2.33047e-06	4.88823e-05	ENSMUSG00000000409/ENSMUSG00000000693/ENSMUSG00000000957/ENSMUSG00000000982/ENSMUSG00000001123/ENSMUSG00000001288/ENSMUSG00000002111/ENSMUSG00000002602/ENSMUSG00000002633/ENSMUSG00000004040/ENSMUSG00000004266/ENSMUSG00000007817/ENSMUSG00000014599/ENSMUSG00000014773/ENSMUSG00000015839/ENSMUSG00000016206/ENSMUSG00000016493/ENSMUSG00000018899/ENSMUSG00000019982/ENSMUSG00000020101/ENSMUSG00000020919/…	Lck/Loxl3/Mmp14/Ccl3/Lgals9/Rarg/Spi1/Axl/Shh/Stat3/Ptpn6/Zmiz1/Csf1/Dll1/Nfe2l2/H2-M3/Cd46/Irf1/Myb/4632428N05Rik/Stat5b/Zfp36l1/Gli3/Syk/Ror2/Ap3b1/Bmp4/Nckap1l/Bcl6/Runx1/Il15ra/Tmem176a/Vegfa/Trem2/Pim1/Eif2ak2/Csf1r/Anxa1/Fas/Casp8/Stat1/Ptprc/Notch1/Rassf2/Rasgrp1/Il21/Fbxw7/Csf3r/Dtx1/Tmem176b/Ptn/Lag3/Clec2d/Tyrobp/Il4ra/Sash3/Il34/Ubash3b/Ets1/Tgfbr2/Trib1/Rbfox2/Gas2l1/Lif/Nfkbiz/Tnfsf9…	86
GO	MF	GO:0015267	channel activity	99/2478	427/17092	8.59741e-07	5.06292e-05	ENSMUSG00000000197/ENSMUSG00000000263/ENSMUSG00000001985/ENSMUSG00000001986/ENSMUSG00000003352/ENSMUSG00000003378/ENSMUSG00000004113/ENSMUSG00000004319/ENSMUSG00000007041/ENSMUSG00000007653/ENSMUSG00000009292/ENSMUSG00000010066/ENSMUSG00000010803/ENSMUSG00000015340/ENSMUSG00000015968/ENSMUSG00000016346/ENSMUSG00000017412/ENSMUSG00000018340/ENSMUSG00000018862/ENSMUSG00000020142/ENSMUSG00000020436/…	Nalcn/Glra1/Grik3/Gria3/Cacnb3/Grik5/Cacna1b/Clcn3/Clic1/Gabrb2/Trpm2/Cacna2d2/Gabra1/Cybb/Cacna1d/Kcnq2/Cacnb4/Anxa6/Otop3/Slc1a4/Gabrg2/Gria1/Asic2/Cacng4/Cacna1g/Ryr2/Jph4/Grik1/Clic6/Asic1/Scn8a/Cacna1h/Aqp4/Jph3/Gria4/Tmem63a/Grin1/Lrrc26/Itgav/Kcnab1/Clca3/Kcnq4/P2rx7/P2rx4/Itpr1/Erc1/Trpm1/Ano1/Rasa3/Gpm6a/Htr3a/Pkd1/Gabrb3/Gria2/Kcnk1/Kcnh5/Pkd2/Gjc1/Cacna1a/Ttyh2/Scn7a/Chrnb4/Kcnc2/Ttyh3…	99
GO	MF	GO:0022803	passive transmembrane transporter activity	99/2478	427/17092	8.59741e-07	5.06292e-05	ENSMUSG00000000197/ENSMUSG00000000263/ENSMUSG00000001985/ENSMUSG00000001986/ENSMUSG00000003352/ENSMUSG00000003378/ENSMUSG00000004113/ENSMUSG00000004319/ENSMUSG00000007041/ENSMUSG00000007653/ENSMUSG00000009292/ENSMUSG00000010066/ENSMUSG00000010803/ENSMUSG00000015340/ENSMUSG00000015968/ENSMUSG00000016346/ENSMUSG00000017412/ENSMUSG00000018340/ENSMUSG00000018862/ENSMUSG00000020142/ENSMUSG00000020436/…	Nalcn/Glra1/Grik3/Gria3/Cacnb3/Grik5/Cacna1b/Clcn3/Clic1/Gabrb2/Trpm2/Cacna2d2/Gabra1/Cybb/Cacna1d/Kcnq2/Cacnb4/Anxa6/Otop3/Slc1a4/Gabrg2/Gria1/Asic2/Cacng4/Cacna1g/Ryr2/Jph4/Grik1/Clic6/Asic1/Scn8a/Cacna1h/Aqp4/Jph3/Gria4/Tmem63a/Grin1/Lrrc26/Itgav/Kcnab1/Clca3/Kcnq4/P2rx7/P2rx4/Itpr1/Erc1/Trpm1/Ano1/Rasa3/Gpm6a/Htr3a/Pkd1/Gabrb3/Gria2/Kcnk1/Kcnh5/Pkd2/Gjc1/Cacna1a/Ttyh2/Scn7a/Chrnb4/Kcnc2/Ttyh3…	99
GO	BP	GO:0032102	negative regulation of response to external stimulus	74/2453	304/17047	2.43211e-06	5.08346e-05	ENSMUSG00000000627/ENSMUSG00000000753/ENSMUSG00000001123/ENSMUSG00000001227/ENSMUSG00000002985/ENSMUSG00000003352/ENSMUSG00000009681/ENSMUSG00000015829/ENSMUSG00000017631/ENSMUSG00000017830/ENSMUSG00000019647/ENSMUSG00000020393/ENSMUSG00000020399/ENSMUSG00000021451/ENSMUSG00000022883/ENSMUSG00000022885/ENSMUSG00000022912/ENSMUSG00000023052/ENSMUSG00000023224/ENSMUSG00000024109/ENSMUSG00000024397/…	Sema4f/Serpinf1/Lgals9/Sema6b/Apoe/Cacnb3/Bcr/Tnr/Abr/Dhx58/Sema6a/Kremen1/Havcr2/Sema4d/Robo1/St6gal1/Pros1/Npff/Serping1/Nrxn1/Aif1/Sema4g/Nrp1/Epha4/Serpine2/Notch1/Grin1/Anxa5/Nfkb1/Tnfrsf1b/Sema3c/Tnfrsf1a/Cd9/Plxna3/Slit2/Cx3cl1/Ubash3b/Ets1/Kank2/Smad3/Trib1/Dbn1/Grn/Ccl12/Cd276/Fgf2/Fndc4/Fgl2/Thbs1/Mill2/Nbl1/Inpp5f/Isl1/Adora1/Zfp36/Rtn4rl1/Krt1/Cd24a/Nr1h4/Cx3cr1/Robo2/Prkg1/Socs3/Tnfa…	74
GO	BP	GO:0045778	positive regulation of ossification	31/2453	92/17047	2.4518e-06	5.10664e-05	ENSMUSG00000007041/ENSMUSG00000019773/ENSMUSG00000019943/ENSMUSG00000021318/ENSMUSG00000021756/ENSMUSG00000021835/ENSMUSG00000023951/ENSMUSG00000024913/ENSMUSG00000025491/ENSMUSG00000026836/ENSMUSG00000028063/ENSMUSG00000028195/ENSMUSG00000029468/ENSMUSG00000029838/ENSMUSG00000031342/ENSMUSG00000031681/ENSMUSG00000032402/ENSMUSG00000034957/ENSMUSG00000035692/ENSMUSG00000035914/ENSMUSG00000037225/…	Clic1/Fbxo5/Atp2b1/Gli3/Il6st/Bmp4/Vegfa/Lrp5/Ifitm1/Acvr1/Lmna/Cyr61/P2rx7/Ptn/Gpm6b/Smad1/Smad3/Cebpa/Isg15/Cd276/Fgf2/Tgfb2/Bmpr1b/Slc8a1/Tmem119/Cebpb/Acvr2b/Ano6/Jund/Cebpd/Ifi204	31
GO	BP	GO:0010038	response to metal ion	87/2453	374/17047	2.48988e-06	5.16781e-05	ENSMUSG00000000263/ENSMUSG00000000409/ENSMUSG00000000753/ENSMUSG00000001750/ENSMUSG00000002633/ENSMUSG00000003545/ENSMUSG00000003617/ENSMUSG00000003849/ENSMUSG00000004347/ENSMUSG00000004952/ENSMUSG00000005413/ENSMUSG00000006764/ENSMUSG00000007655/ENSMUSG00000009292/ENSMUSG00000010660/ENSMUSG00000013275/ENSMUSG00000015340/ENSMUSG00000015839/ENSMUSG00000015950/ENSMUSG00000020122/ENSMUSG00000020866/…	Glra1/Lck/Serpinf1/Tcirg1/Shh/Fosb/Cp/Nqo1/Pde1c/Rasa4/Hmox1/Tph2/Cav1/Trpm2/Plcd1/Slc41a1/Cybb/Nfe2l2/Ncf1/Egfr/Cacna1g/Ryr2/Anxa7/Cpne6/Nrxn1/Cacna1h/Syt4/Syt7/Fas/Fn1/Tnnt2/Parp1/Slc25a12/Cat/Anxa5/Vcam1/Asph/Cpne3/Hpca/P2rx7/P2rx4/Slc6a1/Casp3/Eif2ak3/Mt3/Mt2/Mt1/Gsta4/Trf/Plcg2/Cpne2/Pkd2/Cpne7/Cebpa/Eef2k/Lcat/Sec31a/Kcnc2/Syt1/C1qa/Txnip/Thbs1/Apobec1/Syt15/Tspo/Kcna1/Kcnk3/Syt12/Ptges/Cd1…	87
GO	BP	GO:0001763	morphogenesis of a branching structure	55/2453	206/17047	2.51955e-06	5.21116e-05	ENSMUSG00000000567/ENSMUSG00000000861/ENSMUSG00000000957/ENSMUSG00000001761/ENSMUSG00000002633/ENSMUSG00000003534/ENSMUSG00000004791/ENSMUSG00000006445/ENSMUSG00000009376/ENSMUSG00000014599/ENSMUSG00000015647/ENSMUSG00000016256/ENSMUSG00000016918/ENSMUSG00000017724/ENSMUSG00000020019/ENSMUSG00000021318/ENSMUSG00000021782/ENSMUSG00000021835/ENSMUSG00000023951/ENSMUSG00000024176/ENSMUSG00000024913/…	Sox9/Bcl11a/Mmp14/Smo/Shh/Ddr1/Pgf/Epha2/Met/Csf1/Lama5/Ctsz/Sulf1/Etv4/Ntn4/Gli3/Dlg5/Bmp4/Vegfa/Sox8/Lrp5/Nrp1/Rdh10/Vangl2/Ermn/Acvr1/Notch1/Spint1/Src/Epha7/Tfap2c/Sema3c/Areg/Plxna1/Plxnd1/Col4a1/Slit2/Fgfr1/Agt/Ctsh/Tgfbr2/Pkd1/Pkd2/Dchs1/Spry1/Fgf2/Tgm2/Dag1/Timeless/Cited1/Yap1/Socs3/Gpc3/Sema3e/Nrarp	55
GO	BP	GO:0010594	regulation of endothelial cell migration	44/2453	152/17047	2.54775e-06	5.24816e-05	ENSMUSG00000000753/ENSMUSG00000002633/ENSMUSG00000002985/ENSMUSG00000005413/ENSMUSG00000006445/ENSMUSG00000009376/ENSMUSG00000013076/ENSMUSG00000015305/ENSMUSG00000015839/ENSMUSG00000016128/ENSMUSG00000016933/ENSMUSG00000019803/ENSMUSG00000020580/ENSMUSG00000021701/ENSMUSG00000021835/ENSMUSG00000022475/ENSMUSG00000023886/ENSMUSG00000023951/ENSMUSG00000024659/ENSMUSG00000025810/ENSMUSG00000026222/…	Serpinf1/Shh/Apoe/Hmox1/Epha2/Met/Amotl1/Sash1/Nfe2l2/Stard13/Plcg1/Nr2e1/Rock2/Plk2/Bmp4/Hdac7/Smoc2/Vegfa/Anxa1/Nrp1/Sp100/Dab2ip/Notch1/Spred1/Efna1/Fbxw7/Ppap2b/P2rx4/Ptn/Nr2f2/Gpr124/Slit2/Fgfr1/Agt/Ets1/Card10/Ptprm/Bai1/Fgf2/Thbs1/Amot/Rhoj/Igf2/Kdr	44
GO	BP	GO:0032231	regulation of actin filament bundle assembly	33/2453	101/17047	2.55512e-06	5.24816e-05	ENSMUSG00000001847/ENSMUSG00000002233/ENSMUSG00000009073/ENSMUSG00000009376/ENSMUSG00000019997/ENSMUSG00000020120/ENSMUSG00000020388/ENSMUSG00000020580/ENSMUSG00000021262/ENSMUSG00000021886/ENSMUSG00000022623/ENSMUSG00000025810/ENSMUSG00000027805/ENSMUSG00000028832/ENSMUSG00000031165/ENSMUSG00000031328/ENSMUSG00000031355/ENSMUSG00000031778/ENSMUSG00000032194/ENSMUSG00000032402/ENSMUSG00000032812/…	Rac1/Rhoc/Nf2/Met/Ctgf/Plek/Pdlim4/Rock2/Evl/Gpr65/Shank3/Nrp1/Pfn2/Stmn1/Was/Flna/Arhgap6/Cx3cl1/Kank2/Smad3/Arap1/Dbn1/Kiss1r/Asap3/Limch1/Shank1/Sh3pxd2b/S100a10/Synpo/Ppm1e/Cd47/Cfl1/Arhgef10	33
GO	BP	GO:0045860	positive regulation of protein kinase activity	102/2453	457/17047	2.61629e-06	5.35527e-05	ENSMUSG00000000346/ENSMUSG00000000881/ENSMUSG00000001123/ENSMUSG00000002489/ENSMUSG00000002699/ENSMUSG00000003423/ENSMUSG00000003948/ENSMUSG00000004451/ENSMUSG00000004815/ENSMUSG00000006435/ENSMUSG00000014599/ENSMUSG00000015305/ENSMUSG00000015312/ENSMUSG00000015947/ENSMUSG00000015950/ENSMUSG00000018909/ENSMUSG00000020122/ENSMUSG00000020312/ENSMUSG00000020573/ENSMUSG00000020901/ENSMUSG00000020941/…	Dazap2/Dlg3/Lgals9/Tiam1/Lcp2/Pih1d1/Mmd/Ralb/Dgkq/Neurl1a/Csf1/Sash1/Gadd45b/Fcgr1/Ncf1/Arrb1/Egfr/Shc2/Pik3cg/Pik3r5/Map3k14/Gadd45g/Syk/Ror2/Bmp4/Clu/Ajuba/Nckap1l/Mapk8ip2/Robo1/Vegfa/Fgd2/Pim1/Eif2ak2/Nrxn1/Map3k8/Csf1r/Plce1/Epha4/Ptprc/Atp2b4/Vangl2/Nek6/Zeb2/Dab2ip/Cdc25b/Rassf2/Rasgrp1/Ptpn1/Src/Il6ra/Efna1/Fbxw7/Cyr61/Dab1/Lrp8/Map3k6/P2rx7/Flt1/Tgfa/Camk1/Irak1/Fgfr1/Gab1/Mt3/Agt/Tirap…	102
GO	BP	GO:0021675	nerve development	26/2453	71/17047	2.71284e-06	5.53381e-05	ENSMUSG00000001750/ENSMUSG00000005360/ENSMUSG00000006800/ENSMUSG00000007653/ENSMUSG00000016918/ENSMUSG00000020262/ENSMUSG00000021318/ENSMUSG00000024527/ENSMUSG00000025810/ENSMUSG00000025969/ENSMUSG00000026249/ENSMUSG00000027009/ENSMUSG00000027962/ENSMUSG00000028072/ENSMUSG00000028664/ENSMUSG00000029765/ENSMUSG00000030029/ENSMUSG00000031398/ENSMUSG00000033676/ENSMUSG00000037868/ENSMUSG00000039529/…	Tcirg1/Slc1a3/Sulf2/Gabrb2/Sulf1/Adarb1/Gli3/Afg3l2/Nrp1/Nrp2/Serpine2/Itga4/Vcam1/Ntrk1/Ephb2/Plxna4/Lrig1/Plxna3/Gabrb3/Egr2/Atp8b1/Dag1/Isl1/Tifab/Nav2/Col25a1	26
GO	BP	GO:0045667	regulation of osteoblast differentiation	36/2453	115/17047	2.83685e-06	5.76697e-05	ENSMUSG00000001750/ENSMUSG00000006958/ENSMUSG00000007041/ENSMUSG00000019773/ENSMUSG00000021318/ENSMUSG00000021451/ENSMUSG00000021756/ENSMUSG00000021835/ENSMUSG00000022475/ENSMUSG00000023087/ENSMUSG00000023951/ENSMUSG00000024913/ENSMUSG00000025239/ENSMUSG00000025491/ENSMUSG00000026836/ENSMUSG00000026923/ENSMUSG00000027339/ENSMUSG00000028063/ENSMUSG00000028195/ENSMUSG00000029249/ENSMUSG00000029378/…	Tcirg1/Chrd/Clic1/Fbxo5/Gli3/Sema4d/Il6st/Bmp4/Hdac7/Ccrn4l/Vegfa/Lrp5/Limd1/Ifitm1/Acvr1/Notch1/Rassf2/Lmna/Cyr61/Rest/Areg/Fgfr1/Smad1/Smad3/Cebpa/Cd276/Fgf2/Tmem64/Cited1/Bmpr1b/Tmem119/Cebpb/Acvr2b/Jund/Cebpd/Ifi204	36
GO	BP	GO:0071625	vocalization behavior	2453-11-01	17/17047	2.86231e-06	5.79887e-05	ENSMUSG00000022623/ENSMUSG00000024109/ENSMUSG00000029563/ENSMUSG00000029673/ENSMUSG00000030739/ENSMUSG00000031302/ENSMUSG00000033768/ENSMUSG00000037541/ENSMUSG00000038738/ENSMUSG00000039419/ENSMUSG00000049625	Shank3/Nrxn1/Foxp2/Auts2/Myh14/Nlgn3/Nrxn2/Shank2/Shank1/Cntnap2/Tifab	11
GO	BP	GO:0001912	positive regulation of leukocyte mediated cytotoxicity	24/2453	63/17047	2.9053e-06	5.86594e-05	ENSMUSG00000016206/ENSMUSG00000019998/ENSMUSG00000020919/ENSMUSG00000022378/ENSMUSG00000024339/ENSMUSG00000026395/ENSMUSG00000027347/ENSMUSG00000027718/ENSMUSG00000029468/ENSMUSG00000030124/ENSMUSG00000030579/ENSMUSG00000034116/ENSMUSG00000035929/ENSMUSG00000040511/ENSMUSG00000040987/ENSMUSG00000056116/ENSMUSG00000060550/ENSMUSG00000060802/ENSMUSG00000061232/ENSMUSG00000062300/ENSMUSG00000067212/…	H2-M3/Stx7/Stat5b/Fam49b/Tap2/Ptprc/Rasgrp1/Il21/P2rx7/Lag3/Tyrobp/Vav1/H2-Q4/Pvr/Mill2/H2-T22/H2-Q7/B2m/H2-K1/Pvrl2/H2-T23/H2-Q6/H2-D1/H60b	24
GO	BP	GO:0019884	antigen processing and presentation of exogenous antigen	13/2453	23/17047	3.04577e-06	6.1287e-05	ENSMUSG00000015947/ENSMUSG00000016206/ENSMUSG00000021686/ENSMUSG00000022216/ENSMUSG00000024308/ENSMUSG00000024339/ENSMUSG00000036594/ENSMUSG00000037321/ENSMUSG00000058715/ENSMUSG00000060802/ENSMUSG00000061232/ENSMUSG00000067212/ENSMUSG00000073421	Fcgr1/H2-M3/Ap3b1/Psme1/Tapbp/Tap2/H2-Aa/Tap1/Fcer1g/B2m/H2-K1/H2-T23/H2-Ab1	13
GO	CC	GO:0031258	lamellipodium membrane	2474-12-01	21/17165	6.45636e-06	6.16121e-05	ENSMUSG00000000392/ENSMUSG00000005087/ENSMUSG00000006445/ENSMUSG00000006699/ENSMUSG00000020135/ENSMUSG00000027002/ENSMUSG00000027087/ENSMUSG00000028583/ENSMUSG00000030123/ENSMUSG00000030403/ENSMUSG00000037712/ENSMUSG00000056201	Fap/Cd44/Epha2/Cdc42/Apc2/Nckap1/Itgav/Pdpn/Plxnd1/Vasp/Fermt2/Cfl1	12
GO	CC	GO:0005884	actin filament	35/2474	114/17165	6.54964e-06	6.1622e-05	ENSMUSG00000001847/ENSMUSG00000003283/ENSMUSG00000005057/ENSMUSG00000016382/ENSMUSG00000017774/ENSMUSG00000019843/ENSMUSG00000020135/ENSMUSG00000020173/ENSMUSG00000020388/ENSMUSG00000021998/ENSMUSG00000022451/ENSMUSG00000024143/ENSMUSG00000024397/ENSMUSG00000024659/ENSMUSG00000027002/ENSMUSG00000027646/ENSMUSG00000027940/ENSMUSG00000028328/ENSMUSG00000029465/ENSMUSG00000031078/ENSMUSG00000031165/…	Rac1/Hck/Sh2b2/Pls3/Myo1c/Fyn/Apc2/Cobl/Pdlim4/Lcp1/Twf1/Rhoq/Aif1/Anxa1/Nckap1/Src/Tpm3/Tmod1/Arpc3/Cttn/Was/Flna/Pdlim3/Tpm4/Rac2/Pkd2/Dbn1/Pawr/Gng12/Amot/Specc1/Pls1/Palld/Fkbp15/Wipf1	35
GO	BP	GO:0050921	positive regulation of chemotaxis	40/2453	134/17047	3.11027e-06	6.23734e-05	ENSMUSG00000000982/ENSMUSG00000001847/ENSMUSG00000002489/ENSMUSG00000002633/ENSMUSG00000004056/ENSMUSG00000004791/ENSMUSG00000009376/ENSMUSG00000014599/ENSMUSG00000015533/ENSMUSG00000021508/ENSMUSG00000021702/ENSMUSG00000022488/ENSMUSG00000023886/ENSMUSG00000023951/ENSMUSG00000023992/ENSMUSG00000024397/ENSMUSG00000025810/ENSMUSG00000026193/ENSMUSG00000028635/ENSMUSG00000029470/ENSMUSG00000029838/…	Ccl3/Rac1/Tiam1/Shh/Akt2/Pgf/Met/Csf1/Itga2/Cxcl14/Thbs4/Nckap1l/Smoc2/Vegfa/Trem2/Aif1/Nrp1/Fn1/Edn2/P2rx4/Ptn/Slit2/Fgfr1/Cx3cl1/Cdh13/Smad3/Rac2/Cxcl10/P2ry12/Fgf2/Thbs1/C3ar1/Cmklr1/Tubb2b/C5ar1/Mospd2/Kdr/Mapk3/Ano6/Hmgb1	40
GO	BP	GO:0002822	regulation of adaptive immune response based on somatic recombination of immune receptors built from immunoglobulin superfamily domains	45/2453	158/17047	3.18717e-06	6.37005e-05	ENSMUSG00000000693/ENSMUSG00000002147/ENSMUSG00000004266/ENSMUSG00000015947/ENSMUSG00000016206/ENSMUSG00000016496/ENSMUSG00000018899/ENSMUSG00000019998/ENSMUSG00000020101/ENSMUSG00000020399/ENSMUSG00000020641/ENSMUSG00000022378/ENSMUSG00000022508/ENSMUSG00000023249/ENSMUSG00000024164/ENSMUSG00000024339/ENSMUSG00000024659/ENSMUSG00000024810/ENSMUSG00000026072/ENSMUSG00000026395/ENSMUSG00000027947/…	Loxl3/Stat6/Ptpn6/Fcgr1/H2-M3/Cd274/Irf1/Stx7/4632428N05Rik/Havcr2/Rsad2/Fam49b/Bcl6/Parp3/C3/Tap2/Anxa1/Il33/Il1r1/Ptprc/Il6ra/Tnfrsf1b/P2rx7/Il4ra/Sash3/Was/Nfkbiz/H2-Q4/Arid5a/Cd81/Susd4/Pvr/Clcf1/Cd24a/H2-T22/Fcer1g/H2-Q7/B2m/H2-K1/Pvrl2/Hmgb1/H2-T23/H2-Q6/H2-D1/H2-Ab1	45
GO	BP	GO:0001916	positive regulation of T cell mediated cytotoxicity	16/2453	33/17047	3.2695e-06	6.51268e-05	ENSMUSG00000016206/ENSMUSG00000019998/ENSMUSG00000022378/ENSMUSG00000024339/ENSMUSG00000026395/ENSMUSG00000029468/ENSMUSG00000035929/ENSMUSG00000040511/ENSMUSG00000056116/ENSMUSG00000060550/ENSMUSG00000060802/ENSMUSG00000061232/ENSMUSG00000062300/ENSMUSG00000067212/ENSMUSG00000073409/ENSMUSG00000073411	H2-M3/Stx7/Fam49b/Tap2/Ptprc/P2rx7/H2-Q4/Pvr/H2-T22/H2-Q7/B2m/H2-K1/Pvrl2/H2-T23/H2-Q6/H2-D1	16
GO	BP	GO:0051235	maintenance of location	76/2453	317/17047	3.28138e-06	6.51447e-05	ENSMUSG00000000409/ENSMUSG00000000594/ENSMUSG00000000982/ENSMUSG00000001123/ENSMUSG00000002083/ENSMUSG00000002985/ENSMUSG00000003161/ENSMUSG00000003378/ENSMUSG00000004266/ENSMUSG00000006519/ENSMUSG00000006731/ENSMUSG00000006930/ENSMUSG00000007655/ENSMUSG00000009292/ENSMUSG00000010830/ENSMUSG00000016933/ENSMUSG00000018340/ENSMUSG00000020919/ENSMUSG00000021313/ENSMUSG00000021478/ENSMUSG00000021665/…	Lck/Gm2a/Ccl3/Lgals9/Bbc3/Apoe/Sri/Grik5/Ptpn6/Cyba/B4galnt1/Hap1/Cav1/Trpm2/Kdelr3/Plcg1/Anxa6/Stat5b/Ryr2/Drd1a/Hexb/Jph4/Twf1/Igsf11/Epb4.1l3/C3/Plce1/Jph3/Sp100/Dbi/Ptprc/Soat1/Nr5a1/Lcn2/Itgav/Anxa5/Asph/Plin2/P2rx7/Itpr1/Flna/Rasa3/Cx3cl1/Ubash3b/Slc8b1/Pkd1/Plcg2/Pkd2/Dbn1/Cxcl10/Pip5k1c/Vps13c/Arhgap21/Hk1/Fgf2/Tgfb2/Dag1/Nbl1/Tspo/Dzip1/Lyn/Jph1/Prkce/Vps13a/P2ry6/Vstm2a/Sorl1/Tmsb4x/Sep…	76
GO	BP	GO:0002819	regulation of adaptive immune response	48/2453	173/17047	3.40715e-06	6.74161e-05	ENSMUSG00000000693/ENSMUSG00000002147/ENSMUSG00000004266/ENSMUSG00000015947/ENSMUSG00000016206/ENSMUSG00000016496/ENSMUSG00000018899/ENSMUSG00000019998/ENSMUSG00000020101/ENSMUSG00000020399/ENSMUSG00000020641/ENSMUSG00000022378/ENSMUSG00000022508/ENSMUSG00000022876/ENSMUSG00000023249/ENSMUSG00000024164/ENSMUSG00000024339/ENSMUSG00000024659/ENSMUSG00000024810/ENSMUSG00000025498/ENSMUSG00000026072/…	Loxl3/Stat6/Ptpn6/Fcgr1/H2-M3/Cd274/Irf1/Stx7/4632428N05Rik/Havcr2/Rsad2/Fam49b/Bcl6/Samsn1/Parp3/C3/Tap2/Anxa1/Il33/Irf7/Il1r1/Ptprc/Il6ra/Tnfrsf1b/P2rx7/Il4ra/Sash3/Was/Nfkbiz/H2-Q4/Arid5a/Cd81/Susd4/Pvr/Clcf1/Tnfrsf14/Cd24a/H2-T22/Fcer1g/H2-Q7/B2m/H2-K1/Pvrl2/Hmgb1/H2-T23/H2-Q6/H2-D1/H2-Ab1	48
GO	BP	GO:0035690	cellular response to drug	87/2453	377/17047	3.50555e-06	6.91326e-05	ENSMUSG00000000263/ENSMUSG00000000567/ENSMUSG00000000753/ENSMUSG00000000861/ENSMUSG00000001034/ENSMUSG00000002111/ENSMUSG00000002147/ENSMUSG00000002602/ENSMUSG00000003849/ENSMUSG00000004207/ENSMUSG00000005413/ENSMUSG00000006519/ENSMUSG00000009292/ENSMUSG00000009376/ENSMUSG00000010086/ENSMUSG00000011148/ENSMUSG00000015340/ENSMUSG00000015839/ENSMUSG00000018537/ENSMUSG00000019843/ENSMUSG00000019982/…	Glra1/Sox9/Serpinf1/Bcl11a/Mapk7/Spi1/Stat6/Axl/Nqo1/Psap/Hmox1/Cyba/Trpm2/Met/Rnf112/Adssl1/Cybb/Nfe2l2/Pcgf2/Fyn/Myb/Egfr/Adcy3/Asic2/Net1/Ryr2/Drd1a/Bmp4/Fbxo32/Ly6h/Cyp1b1/Aif1/Anxa1/Rela/Hk3/Cflar/Atp2b4/Lcn2/Dnmt3b/Src/Gucy1b3/Adam15/Arhgef2/Ntrk1/Gclm/Nfkb1/Pde4b/Epha5/Rest/P2rx4/Rgs10/Slit2/Sorbs2/Tlr3/Mt3/Mt2/Ets1/Dcps/Gnai2/Folr2/Chrm1/Kcnc2/Pawr/P2ry12/Eef1a1/Nod1/Ppp1r9b/Gpr37/Timeles…	87
GO	CC	GO:0032589	neuron projection membrane	24/2474	66/17165	7.7002e-06	7.14408e-05	ENSMUSG00000004631/ENSMUSG00000010803/ENSMUSG00000015968/ENSMUSG00000017314/ENSMUSG00000017774/ENSMUSG00000019943/ENSMUSG00000020436/ENSMUSG00000020524/ENSMUSG00000021057/ENSMUSG00000022494/ENSMUSG00000024044/ENSMUSG00000026959/ENSMUSG00000027270/ENSMUSG00000028785/ENSMUSG00000031543/ENSMUSG00000032491/ENSMUSG00000035441/ENSMUSG00000035681/ENSMUSG00000035863/ENSMUSG00000038976/ENSMUSG00000039419/…	Sgce/Gabra1/Cacna1d/Mpp2/Myo1c/Atp2b1/Gabrg2/Gria1/Akap5/Shisa9/Epb4.1l3/Grin1/Lamp5/Hpca/Ank1/Nradd/Myo1d/Kcnc2/Palm/Ppp1r9b/Cntnap2/Adora1/Shisa6/Kcnc1	24
GO	BP	GO:0043405	regulation of MAP kinase activity	70/2453	286/17047	3.67103e-06	7.21563e-05	ENSMUSG00000002489/ENSMUSG00000002985/ENSMUSG00000004266/ENSMUSG00000007655/ENSMUSG00000015305/ENSMUSG00000015312/ENSMUSG00000018334/ENSMUSG00000018909/ENSMUSG00000019960/ENSMUSG00000020122/ENSMUSG00000020227/ENSMUSG00000020312/ENSMUSG00000020573/ENSMUSG00000020901/ENSMUSG00000020941/ENSMUSG00000021453/ENSMUSG00000021457/ENSMUSG00000021464/ENSMUSG00000021835/ENSMUSG00000022178/ENSMUSG00000022883/…	Tiam1/Apoe/Ptpn6/Cav1/Sash1/Gadd45b/Ksr1/Arrb1/Dusp6/Egfr/Irak3/Shc2/Pik3cg/Pik3r5/Map3k14/Gadd45g/Syk/Ror2/Bmp4/Ajuba/Robo1/Vegfa/Fgd2/Eif2ak2/Map3k8/Spry4/Plce1/Ptprj/Epha4/Ptprc/Vangl2/Zeb2/Dab2ip/Mapk8ip1/Rasgrp1/Spred1/Ptpn1/Src/Ephb2/Map3k6/P2rx7/Flt1/Tgfa/Dusp16/Irak1/Fgfr1/Gab1/Trib1/Trf/Inppl1/Tnxb/Kiss1r/Spry1/Fgf2/Cd81/Dusp8/Tlr4/Thbs1/Lyn/Adora1/Map3k9/Cd24a/Dusp18/Sorl1/Magi3/Alk/Erb…	70
GO	BP	GO:1902107	positive regulation of leukocyte differentiation	44/2453	154/17047	3.72428e-06	7.29614e-05	ENSMUSG00000000409/ENSMUSG00000000957/ENSMUSG00000000982/ENSMUSG00000001123/ENSMUSG00000002602/ENSMUSG00000002633/ENSMUSG00000007817/ENSMUSG00000014599/ENSMUSG00000016206/ENSMUSG00000016493/ENSMUSG00000018899/ENSMUSG00000019982/ENSMUSG00000020101/ENSMUSG00000020919/ENSMUSG00000021127/ENSMUSG00000021318/ENSMUSG00000021457/ENSMUSG00000021464/ENSMUSG00000021686/ENSMUSG00000022488/ENSMUSG00000022508/…	Lck/Mmp14/Ccl3/Lgals9/Axl/Shh/Zmiz1/Csf1/H2-M3/Cd46/Irf1/Myb/4632428N05Rik/Stat5b/Zfp36l1/Gli3/Syk/Ror2/Ap3b1/Nckap1l/Bcl6/Runx1/Il15ra/Trem2/Csf1r/Anxa1/Casp8/Ptprc/Rasgrp1/Il21/Tyrobp/Il4ra/Sash3/Il34/Tgfbr2/Trib1/Lif/Nfkbiz/Tnfsf9/H2-Aa/Klf10/Tox/Tmem64/Jun	44
GO	BP	GO:0099562	maintenance of postsynaptic density structure	2453-09-01	12/17047	3.79832e-06	7.41672e-05	ENSMUSG00000000881/ENSMUSG00000003279/ENSMUSG00000017314/ENSMUSG00000022623/ENSMUSG00000037541/ENSMUSG00000038738/ENSMUSG00000040003/ENSMUSG00000040479/ENSMUSG00000052572	Dlg3/Dlgap1/Mpp2/Shank3/Shank2/Shank1/Magi2/Dgkz/Dlg2	9
GO	BP	GO:0001764	neuron migration	45/2453	159/17047	3.83375e-06	7.46136e-05	ENSMUSG00000001507/ENSMUSG00000001847/ENSMUSG00000002602/ENSMUSG00000004040/ENSMUSG00000007989/ENSMUSG00000009418/ENSMUSG00000019647/ENSMUSG00000019843/ENSMUSG00000021478/ENSMUSG00000023951/ENSMUSG00000025810/ENSMUSG00000025969/ENSMUSG00000026072/ENSMUSG00000026587/ENSMUSG00000026620/ENSMUSG00000026826/ENSMUSG00000026883/ENSMUSG00000027168/ENSMUSG00000028059/ENSMUSG00000028519/ENSMUSG00000029033/…	Itga3/Rac1/Axl/Stat3/Fzd3/Nav1/Sema6a/Fyn/Drd1a/Vegfa/Nrp1/Nrp2/Il1r1/Astn1/Mark1/Nr4a2/Dab2ip/Pax6/Arhgef2/Dab1/Acap3/Auts2/Chl1/Nr2f2/Cdkl5/Flna/Gpm6a/Kirrel3/Igsf10/Plxnb2/Lphn3/Reln/Trim46/Tubb2b/C77370/Flrt2/Neurod4/Ndnf/Prkg1/Ntrk2/Gpr173/Camk2b/Scrt2/Ctnna2/Unc5d	45
GO	BP	GO:0001910	regulation of leukocyte mediated cytotoxicity	29/2453	85/17047	3.86564e-06	7.49883e-05	ENSMUSG00000001123/ENSMUSG00000016206/ENSMUSG00000019998/ENSMUSG00000020399/ENSMUSG00000020919/ENSMUSG00000022378/ENSMUSG00000024339/ENSMUSG00000026395/ENSMUSG00000027347/ENSMUSG00000027718/ENSMUSG00000029468/ENSMUSG00000030124/ENSMUSG00000030157/ENSMUSG00000030579/ENSMUSG00000034116/ENSMUSG00000035929/ENSMUSG00000037321/ENSMUSG00000040511/ENSMUSG00000040987/ENSMUSG00000048583/ENSMUSG00000056116/…	Lgals9/H2-M3/Stx7/Havcr2/Stat5b/Fam49b/Tap2/Ptprc/Rasgrp1/Il21/P2rx7/Lag3/Clec2d/Tyrobp/Vav1/H2-Q4/Tap1/Pvr/Mill2/Igf2/H2-T22/H2-Q7/B2m/H2-K1/Pvrl2/H2-T23/H2-Q6/H2-D1/H60b	29
GO	BP	GO:0099560	synaptic membrane adhesion	15/2453	30/17047	4.08298e-06	7.86902e-05	ENSMUSG00000024109/ENSMUSG00000028399/ENSMUSG00000031119/ENSMUSG00000033295/ENSMUSG00000034275/ENSMUSG00000034912/ENSMUSG00000035566/ENSMUSG00000036957/ENSMUSG00000040003/ENSMUSG00000047085/ENSMUSG00000048304/ENSMUSG00000049939/ENSMUSG00000050587/ENSMUSG00000051379/ENSMUSG00000063887	Nrxn1/Ptprd/Gpc4/Ptprf/Igsf9b/Mdga2/Pcdh17/Lrfn3/Magi2/Lrrc4b/Slitrk3/Lrrc4/Lrrc4c/Flrt3/Nlgn1	15
GO	BP	GO:0099563	modification of synaptic structure	15/2453	30/17047	4.08298e-06	7.86902e-05	ENSMUSG00000000416/ENSMUSG00000002489/ENSMUSG00000006699/ENSMUSG00000021478/ENSMUSG00000026235/ENSMUSG00000027805/ENSMUSG00000029249/ENSMUSG00000030447/ENSMUSG00000031078/ENSMUSG00000032936/ENSMUSG00000033389/ENSMUSG00000042388/ENSMUSG00000043079/ENSMUSG00000056201/ENSMUSG00000063063	Cttnbp2/Tiam1/Cdc42/Drd1a/Epha4/Pfn2/Rest/Cyfip1/Cttn/Camkv/Arhgap44/Dlgap3/Synpo/Cfl1/Ctnna2	15
GO	BP	GO:0043113	receptor clustering	23/2453	60/17047	4.11108e-06	7.88982e-05	ENSMUSG00000000881/ENSMUSG00000002985/ENSMUSG00000003378/ENSMUSG00000022623/ENSMUSG00000024109/ENSMUSG00000024304/ENSMUSG00000025656/ENSMUSG00000027009/ENSMUSG00000029838/ENSMUSG00000030098/ENSMUSG00000031328/ENSMUSG00000031626/ENSMUSG00000033768/ENSMUSG00000034656/ENSMUSG00000037706/ENSMUSG00000040003/ENSMUSG00000041936/ENSMUSG00000042453/ENSMUSG00000044716/ENSMUSG00000052572/ENSMUSG00000053930/…	Dlg3/Apoe/Grik5/Shank3/Nrxn1/Cdh2/Arhgef9/Itga4/Ptn/Grip2/Flna/Sorbs2/Nrxn2/Cacna1a/Cd81/Magi2/Agrn/Reln/Dok7/Dlg2/Shisa6/Grik2/Nlgn1	23
GO	BP	GO:0002698	negative regulation of immune effector process	38/2453	126/17047	4.14694e-06	7.88982e-05	ENSMUSG00000000693/ENSMUSG00000001123/ENSMUSG00000004266/ENSMUSG00000005413/ENSMUSG00000009681/ENSMUSG00000016206/ENSMUSG00000016481/ENSMUSG00000016493/ENSMUSG00000017631/ENSMUSG00000017830/ENSMUSG00000018899/ENSMUSG00000020101/ENSMUSG00000020227/ENSMUSG00000020399/ENSMUSG00000022508/ENSMUSG00000023224/ENSMUSG00000023249/ENSMUSG00000024339/ENSMUSG00000024659/ENSMUSG00000024810/ENSMUSG00000026395/…	Loxl3/Lgals9/Ptpn6/Hmox1/Bcr/H2-M3/Cr1l/Cd46/Abr/Dhx58/Irf1/4632428N05Rik/Irak3/Havcr2/Bcl6/Serping1/Parp3/Tap2/Anxa1/Il33/Ptprc/A2m/Clec2d/Il4ra/Cd59a/Grn/Tap1/Cd84/Susd4/Tgfb2/Fgl2/Mill2/Bst2/Igf2/Cd47/H2-T23/Tspan6/Cd59b	38
GO	BP	GO:0032946	positive regulation of mononuclear cell proliferation	38/2453	126/17047	4.14694e-06	7.88982e-05	ENSMUSG00000000732/ENSMUSG00000002633/ENSMUSG00000014599/ENSMUSG00000016493/ENSMUSG00000016496/ENSMUSG00000020399/ENSMUSG00000020919/ENSMUSG00000021457/ENSMUSG00000021756/ENSMUSG00000022488/ENSMUSG00000022508/ENSMUSG00000022885/ENSMUSG00000022901/ENSMUSG00000024397/ENSMUSG00000024659/ENSMUSG00000026395/ENSMUSG00000027544/ENSMUSG00000027718/ENSMUSG00000027947/ENSMUSG00000027962/ENSMUSG00000029084/…	Icosl/Shh/Csf1/Cd46/Cd274/Havcr2/Stat5b/Syk/Il6st/Nckap1l/Bcl6/St6gal1/Cd86/Aif1/Anxa1/Ptprc/Nfatc2/Il21/Il6ra/Vcam1/Cd38/Sash3/Efnb1/Tgfbr2/Nck1/Myd88/Vav3/Tnfsf9/Cd276/Cd81/Tlr4/Clcf1/Cd24a/Ccdc88b/Igf2/Rasal3/H2-T23/Cd59b	38
GO	BP	GO:0051209	release of sequestered calcium ion into cytosol	38/2453	126/17047	4.14694e-06	7.88982e-05	ENSMUSG00000000409/ENSMUSG00000000982/ENSMUSG00000002083/ENSMUSG00000003161/ENSMUSG00000004266/ENSMUSG00000006519/ENSMUSG00000006930/ENSMUSG00000009292/ENSMUSG00000016933/ENSMUSG00000021313/ENSMUSG00000021478/ENSMUSG00000022208/ENSMUSG00000024998/ENSMUSG00000025318/ENSMUSG00000026385/ENSMUSG00000026395/ENSMUSG00000027087/ENSMUSG00000028207/ENSMUSG00000029468/ENSMUSG00000030102/ENSMUSG00000031453/…	Lck/Ccl3/Bbc3/Sri/Ptpn6/Cyba/Hap1/Trpm2/Plcg1/Ryr2/Drd1a/Jph4/Plce1/Jph3/Dbi/Ptprc/Itgav/Asph/P2rx7/Itpr1/Rasa3/Cx3cl1/Ubash3b/Slc8b1/Plcg2/Pkd2/Cxcl10/Fgf2/Tgfb2/Lyn/Jph1/Prkce/P2ry6/Sepn1/Cacna1c/Slc8a1/Capn3/Ccr5	38
GO	BP	GO:0001570	vasculogenesis	28/2453	81/17047	4.22441e-06	8.01153e-05	ENSMUSG00000000378/ENSMUSG00000001761/ENSMUSG00000002633/ENSMUSG00000006445/ENSMUSG00000007655/ENSMUSG00000007817/ENSMUSG00000019789/ENSMUSG00000020097/ENSMUSG00000021127/ENSMUSG00000022475/ENSMUSG00000025321/ENSMUSG00000025810/ENSMUSG00000026923/ENSMUSG00000027087/ENSMUSG00000027351/ENSMUSG00000028086/ENSMUSG00000030796/ENSMUSG00000031565/ENSMUSG00000032220/ENSMUSG00000032440/ENSMUSG00000034520/…	Ccm2/Smo/Shh/Epha2/Cav1/Zmiz1/Hey2/Sgpl1/Zfp36l1/Hdac7/Itgb8/Nrp1/Notch1/Itgav/Spred1/Fbxw7/Tead2/Fgfr1/Myo1e/Tgfbr2/Gjc1/Cul7/Amot/Cited1/Junb/Yap1/Ntrk2/Qk	28
GO	CC	GO:0098858	actin-based cell projection	56/2474	219/17165	8.92322e-06	8.16536e-05	ENSMUSG00000001507/ENSMUSG00000002233/ENSMUSG00000006782/ENSMUSG00000007989/ENSMUSG00000009073/ENSMUSG00000014686/ENSMUSG00000016382/ENSMUSG00000017774/ENSMUSG00000019820/ENSMUSG00000020437/ENSMUSG00000020733/ENSMUSG00000021057/ENSMUSG00000021998/ENSMUSG00000022272/ENSMUSG00000022451/ENSMUSG00000025555/ENSMUSG00000025813/ENSMUSG00000026235/ENSMUSG00000026830/ENSMUSG00000027087/ENSMUSG00000027962/…	Itga3/Rhoc/Cnp/Fzd3/Nf2/Ceacam16/Pls3/Myo1c/Utrn/Myo1g/Slc9a3r1/Akap5/Lcp1/Myo10/Twf1/Farp1/Homer2/Epha4/Ermn/Itgav/Vcam1/Clca3/Pdpn/Fscn1/Exoc4/Osbpl3/Vasp/Cyfip1/Msn/Gpr124/Gpm6a/Nedd4/Inppl1/Dbn1/Palm/Dock4/Plekhg6/Srcin1/Ppp1r9b/Atp8b1/Dag1/Clrn1/Aqp5/Kcnj10/Cd24a/Arl4c/Cfl1/Palld/Slc27a4/Unc5c/Cd302/Erbb2/Nlgn1/Lyz2/Fat1/Cbx6	56
GO	MF	GO:0005516	calmodulin binding	49/2478	172/17092	1.46955e-06	8.19853e-05	ENSMUSG00000000120/ENSMUSG00000002012/ENSMUSG00000004347/ENSMUSG00000016346/ENSMUSG00000016528/ENSMUSG00000017774/ENSMUSG00000019943/ENSMUSG00000020122/ENSMUSG00000020190/ENSMUSG00000020437/ENSMUSG00000020654/ENSMUSG00000021057/ENSMUSG00000021313/ENSMUSG00000021820/ENSMUSG00000022272/ENSMUSG00000022443/ENSMUSG00000024743/ENSMUSG00000024778/ENSMUSG00000026463/ENSMUSG00000026959/ENSMUSG00000028631/…	Ngfr/Pnck/Pde1c/Kcnq2/Mapkapk2/Myo1c/Atp2b1/Egfr/Mknk2/Myo1g/Adcy3/Akap5/Ryr2/Camk2g/Myo10/Myh9/Syt7/Fas/Atp2b4/Grin1/Kcnq4/Slc9a1/Add2/Camk1/Atp2b2/Myh14/Myo1e/Mapkapk3/Camkv/Kcnh5/Cacna1a/Eef2k/Myo1d/Syt1/Eef1a1/Wfs1/Mbp/Marcksl1/Orai1/Cacna1c/Cnn3/Map6/Grm7/Scn3a/Rit2/Sptan1/Camk2b/Marcks/Pcp4	49
GO	CC	GO:0034703	cation channel complex	55/2474	214/17165	9.10713e-06	8.22103e-05	ENSMUSG00000000881/ENSMUSG00000001985/ENSMUSG00000001986/ENSMUSG00000003352/ENSMUSG00000003378/ENSMUSG00000004113/ENSMUSG00000007783/ENSMUSG00000010066/ENSMUSG00000015968/ENSMUSG00000016346/ENSMUSG00000017412/ENSMUSG00000020524/ENSMUSG00000020723/ENSMUSG00000020866/ENSMUSG00000021313/ENSMUSG00000021973/ENSMUSG00000022494/ENSMUSG00000023033/ENSMUSG00000024112/ENSMUSG00000025892/ENSMUSG00000026833/…	Dlg3/Grik3/Gria3/Cacnb3/Grik5/Cacna1b/Cpt1c/Cacna2d2/Cacna1d/Kcnq2/Cacnb4/Gria1/Cacng4/Cacna1g/Ryr2/Micu2/Shisa9/Scn8a/Cacna1h/Gria4/Olfm1/Grin1/Lrrc26/Kcnab1/Pde4b/Kcnq4/Cttn/Herpud1/Olfm2/Htr3a/Pkd1/Kcnk1/Pkd2/Cacna1a/Scn7a/Kcnc2/Nos1ap/Shank1/Cntnap2/Cacng5/Kcnd3/Dlgap3/Kcng4/Kcna5/Kcna1/Amigo1/Cacna1c/Dlg2/Shisa6/Grik2/Scn3a/Kcnc1/Dpp6/Kcnc3/Nlgn1	55
GO	BP	GO:0034764	positive regulation of transmembrane transport	58/2453	225/17047	4.51787e-06	8.54079e-05	ENSMUSG00000003161/ENSMUSG00000003352/ENSMUSG00000004056/ENSMUSG00000006930/ENSMUSG00000013921/ENSMUSG00000014077/ENSMUSG00000015839/ENSMUSG00000015968/ENSMUSG00000016933/ENSMUSG00000017400/ENSMUSG00000017412/ENSMUSG00000020704/ENSMUSG00000020723/ENSMUSG00000020733/ENSMUSG00000021313/ENSMUSG00000021478/ENSMUSG00000021835/ENSMUSG00000022623/ENSMUSG00000022965/ENSMUSG00000023992/ENSMUSG00000024065/…	Sri/Cacnb3/Akt2/Hap1/Clip3/Chp1/Nfe2l2/Cacna1d/Plcg1/Stac2/Cacnb4/Asic2/Cacng4/Slc9a3r1/Ryr2/Drd1a/Bmp4/Shank3/Ifngr2/Trem2/Ehd3/Rhoq/C3/Gal/Dbi/Lrrc26/Asph/Ephb2/Slc9a1/P2rx7/Arl6ip1/Nlgn3/Flna/Cx3cl1/Agt/Htr3a/Plcg2/Pkd2/Cxcl10/Kcnc2/Fxyd1/Fam115a/Ctss/Reln/S100a1/Kcna1/P2ry6/Amigo1/Cacna1c/Prkg1/Gpc3/Irs1/Cfl1/Kcnc1/Dpp6/Ano6/Ank3/Capn3	58
GO	CC	GO:0042383	sarcolemma	45/2474	164/17165	9.72551e-06	8.66219e-05	ENSMUSG00000001119/ENSMUSG00000003161/ENSMUSG00000003352/ENSMUSG00000004631/ENSMUSG00000007655/ENSMUSG00000015968/ENSMUSG00000017400/ENSMUSG00000018340/ENSMUSG00000019820/ENSMUSG00000019848/ENSMUSG00000020241/ENSMUSG00000020723/ENSMUSG00000020828/ENSMUSG00000021313/ENSMUSG00000022462/ENSMUSG00000024302/ENSMUSG00000024304/ENSMUSG00000024411/ENSMUSG00000024659/ENSMUSG00000024778/ENSMUSG00000026463/…	Col6a1/Sri/Cacnb3/Sgce/Cav1/Cacna1d/Stac2/Anxa6/Utrn/Popdc3/Col6a2/Cacng4/Pld2/Ryr2/Slc38a2/Dtna/Cdh2/Aqp4/Anxa1/Fas/Atp2b4/Anxa5/Vcam1/Slc9a1/Sgcb/Msn/Ank1/Slc8b1/Atp1a1/Fxyd1/Nos1ap/Dag1/Kcnd3/Agrn/Trim72/Prkce/Cacna1c/Slc8a1/Flot1/Cd59b/Flnc/Ank3/Ahnak/Ahnak2/Capn3	45
GO	BP	GO:0007009	plasma membrane organization	32/2453	99/17047	4.66915e-06	8.79875e-05	ENSMUSG00000004056/ENSMUSG00000004207/ENSMUSG00000007655/ENSMUSG00000018340/ENSMUSG00000022037/ENSMUSG00000022443/ENSMUSG00000024044/ENSMUSG00000024743/ENSMUSG00000026395/ENSMUSG00000026837/ENSMUSG00000028381/ENSMUSG00000029468/ENSMUSG00000032369/ENSMUSG00000032372/ENSMUSG00000032733/ENSMUSG00000033039/ENSMUSG00000033763/ENSMUSG00000036098/ENSMUSG00000038859/ENSMUSG00000039239/ENSMUSG00000039735/…	Akt2/Psap/Cav1/Anxa6/Clu/Myh9/Epb4.1l3/Syt7/Ptprc/Col5a1/Ugcg/P2rx7/Plscr1/Plscr2/Snx33/Micall1/Mtss1l/Myrf/Baiap2l1/Tgfb2/Fnbp1l/Agrn/Trim72/Sh3tc2/Myof/Xkr4/Flot1/Ano6/Syt11/Ank3/Fcho1/Ehd2	32
GO	MF	GO:0005261	cation channel activity	74/2478	299/17092	1.67148e-06	8.85887e-05	ENSMUSG00000000197/ENSMUSG00000001985/ENSMUSG00000001986/ENSMUSG00000003352/ENSMUSG00000003378/ENSMUSG00000004113/ENSMUSG00000009292/ENSMUSG00000010066/ENSMUSG00000015968/ENSMUSG00000016346/ENSMUSG00000017412/ENSMUSG00000018340/ENSMUSG00000018862/ENSMUSG00000020524/ENSMUSG00000020704/ENSMUSG00000020723/ENSMUSG00000020866/ENSMUSG00000021313/ENSMUSG00000022208/ENSMUSG00000023017/ENSMUSG00000023033/…	Nalcn/Grik3/Gria3/Cacnb3/Grik5/Cacna1b/Trpm2/Cacna2d2/Cacna1d/Kcnq2/Cacnb4/Anxa6/Otop3/Gria1/Asic2/Cacng4/Cacna1g/Ryr2/Jph4/Asic1/Scn8a/Cacna1h/Jph3/Gria4/Tmem63a/Grin1/Lrrc26/Itgav/Kcnab1/Kcnq4/P2rx7/P2rx4/Itpr1/Erc1/Trpm1/Ano1/Rasa3/Gpm6a/Htr3a/Pkd1/Kcnk1/Kcnh5/Pkd2/Cacna1a/Scn7a/Chrnb4/Kcnc2/Slc24a2/Kcnj9/Cacng5/Kcnd3/Jph1/Kcnj10/Kcng4/Kcna5/Kcnk6/Marcksl1/Kcna1/Kcnk3/Orai1/Cacna1c/Trpm3/Tmco1…	74
GO	BP	GO:0048732	gland development	100/2453	452/17047	4.89494e-06	9.19504e-05	ENSMUSG00000000567/ENSMUSG00000000753/ENSMUSG00000001288/ENSMUSG00000001761/ENSMUSG00000002147/ENSMUSG00000002633/ENSMUSG00000003534/ENSMUSG00000003644/ENSMUSG00000004207/ENSMUSG00000005413/ENSMUSG00000005958/ENSMUSG00000006435/ENSMUSG00000006445/ENSMUSG00000006699/ENSMUSG00000006800/ENSMUSG00000007655/ENSMUSG00000008575/ENSMUSG00000014599/ENSMUSG00000015533/ENSMUSG00000015647/ENSMUSG00000016918/…	Sox9/Serpinf1/Rarg/Smo/Stat6/Shh/Ddr1/Rps6ka1/Psap/Hmox1/Ephb3/Neurl1a/Epha2/Cdc42/Sulf2/Cav1/Nfib/Csf1/Itga2/Lama5/Sulf1/Cacnb4/Rarb/Etv4/Arid5b/Myb/Ntn4/Socs2/Egfr/Cobl/Slc9a3r1/Stat5b/Gli3/Bmp4/Robo1/Cela1/Vegfa/Man2a1/Anxa1/Lrp5/Rela/Fasn/Nat1/Nrp1/Cflar/Serpine2/Nr5a1/Notch1/Lhx3/Frzb/Pax6/Src/Lmo4/Tfap2c/Sema3c/Areg/Asns/Ptn/Tgfa/Plxna1/Itpr1/Plxnd1/Atp2b2/Slco2b1/Cckbr/Msn/Slit2/Fgfr1/Ets1…	100
GO	CC	GO:0005764	lysosome	91/2474	409/17165	1.08937e-05	9.57496e-05	ENSMUSG00000000594/ENSMUSG00000001750/ENSMUSG00000002083/ENSMUSG00000002985/ENSMUSG00000003283/ENSMUSG00000003948/ENSMUSG00000004207/ENSMUSG00000004347/ENSMUSG00000004626/ENSMUSG00000005142/ENSMUSG00000005656/ENSMUSG00000006930/ENSMUSG00000007891/ENSMUSG00000009292/ENSMUSG00000015027/ENSMUSG00000015837/ENSMUSG00000016256/ENSMUSG00000016534/ENSMUSG00000018340/ENSMUSG00000018567/ENSMUSG00000018774/…	Gm2a/Tcirg1/Bbc3/Apoe/Hck/Mmd/Psap/Pde1c/Stxbp2/Man2b1/Snx6/Hap1/Ctsd/Trpm2/Galns/Sqstm1/Ctsz/Lamp2/Anxa6/Gabarap/Cd68/Cyb561/Fuca2/Stx7/Slc29a3/Laptm4a/Gfap/Chga/Hexb/Naga/Litaf/Arsa/Dirc2/Rab12/3110002H16Rik/Anxa1/Slc15a3/Syt7/Lipa/Gpr143/Cd63/Ifitm3/Gusb/Itm2c/Capn2/Tmem63a/Cat/Lamp5/Rasgrp1/Src/Ctso/Manba/Tmem55a/Rragd/Laptm5/Fuca1/Rnf19b/Man2b2/Tmem165/Scarb2/Ctsc/Mt1/Pla2g15/Rab27a/Ctsh/Idu…	91
GO	BP	GO:0071621	granulocyte chemotaxis	33/2453	104/17047	5.23745e-06	9.80742e-05	ENSMUSG00000000982/ENSMUSG00000001847/ENSMUSG00000002897/ENSMUSG00000014599/ENSMUSG00000018927/ENSMUSG00000019122/ENSMUSG00000021457/ENSMUSG00000021702/ENSMUSG00000022488/ENSMUSG00000023951/ENSMUSG00000024659/ENSMUSG00000028525/ENSMUSG00000028635/ENSMUSG00000028859/ENSMUSG00000031558/ENSMUSG00000031778/ENSMUSG00000031990/ENSMUSG00000033220/ENSMUSG00000033721/ENSMUSG00000034116/ENSMUSG00000034855/…	Ccl3/Rac1/Il17ra/Csf1/Ccl6/Ccl9/Syk/Thbs4/Nckap1l/Vegfa/Anxa1/Pde4b/Edn2/Csf3r/Slit2/Cx3cl1/Jam3/Rac2/Vav3/Vav1/Cxcl10/Ccl12/Itga9/Tgfb2/Prex1/C3ar1/Cmklr1/C5ar1/Lgals3/Fcer1g/Mospd2/Mapk3/C5ar2	33
GO	BP	GO:0070665	positive regulation of leukocyte proliferation	39/2453	132/17047	5.40712e-06	0.000100933	ENSMUSG00000000732/ENSMUSG00000002633/ENSMUSG00000014599/ENSMUSG00000016493/ENSMUSG00000016496/ENSMUSG00000020399/ENSMUSG00000020919/ENSMUSG00000021457/ENSMUSG00000021756/ENSMUSG00000022488/ENSMUSG00000022508/ENSMUSG00000022885/ENSMUSG00000022901/ENSMUSG00000024397/ENSMUSG00000024659/ENSMUSG00000026395/ENSMUSG00000027544/ENSMUSG00000027718/ENSMUSG00000027947/ENSMUSG00000027962/ENSMUSG00000029084/…	Icosl/Shh/Csf1/Cd46/Cd274/Havcr2/Stat5b/Syk/Il6st/Nckap1l/Bcl6/St6gal1/Cd86/Aif1/Anxa1/Ptprc/Nfatc2/Il21/Il6ra/Vcam1/Cd38/Sash3/Efnb1/Tgfbr2/Nck1/Myd88/Vav3/Tnfsf9/Cd276/Cd81/Tlr4/Clcf1/Lyn/Cd24a/Ccdc88b/Igf2/Rasal3/H2-T23/Cd59b	39
GO	BP	GO:0050663	cytokine secretion	56/2453	216/17047	5.43758e-06	0.000101183	ENSMUSG00000000982/ENSMUSG00000001123/ENSMUSG00000001750/ENSMUSG00000002699/ENSMUSG00000002897/ENSMUSG00000015243/ENSMUSG00000016496/ENSMUSG00000020399/ENSMUSG00000021457/ENSMUSG00000022575/ENSMUSG00000023915/ENSMUSG00000024397/ENSMUSG00000024621/ENSMUSG00000024659/ENSMUSG00000024810/ENSMUSG00000024816/ENSMUSG00000025888/ENSMUSG00000026193/ENSMUSG00000026896/ENSMUSG00000026923/ENSMUSG00000027087/…	Ccl3/Lgals9/Tcirg1/Lcp2/Il17ra/Abca1/Cd274/Havcr2/Syk/Gsdmd/Tnfrsf21/Aif1/Csf1r/Anxa1/Il33/Frmd8/Casp1/Fn1/Ifih1/Notch1/Itgav/Rasgrp1/Src/Tlr2/Tnfrsf1b/Rnf19b/Fgr/P2rx7/Clec5a/Anxa4/Il4ra/Cx3cl1/Agt/Ssc5d/Isg15/Cd276/Hk1/Arid5a/Akap12/Tlr4/Lrp1/Ddx58/Mbp/Lyn/Tnfrsf14/AF251705/Nr1h4/Cd14/Cyp2j6/Panx2/Mapk3/Chil1/Hmgb1/Syt11/C5ar2/Ccr5	56
GO	BP	GO:0110053	regulation of actin filament organization	62/2453	247/17047	5.47511e-06	0.000101563	ENSMUSG00000000915/ENSMUSG00000001847/ENSMUSG00000002233/ENSMUSG00000009073/ENSMUSG00000009376/ENSMUSG00000017774/ENSMUSG00000019997/ENSMUSG00000020120/ENSMUSG00000020388/ENSMUSG00000020580/ENSMUSG00000021262/ENSMUSG00000021886/ENSMUSG00000022451/ENSMUSG00000022488/ENSMUSG00000022623/ENSMUSG00000025810/ENSMUSG00000027002/ENSMUSG00000027805/ENSMUSG00000028328/ENSMUSG00000028832/ENSMUSG00000029465/…	Hip1r/Rac1/Rhoc/Nf2/Met/Myo1c/Ctgf/Plek/Pdlim4/Rock2/Evl/Gpr65/Twf1/Nckap1l/Shank3/Nrp1/Nckap1/Pfn2/Tmod1/Stmn1/Arpc3/Arpc1b/Add2/Vasp/Cyfip1/Cttn/Was/Flna/Arhgap6/Slit2/Cx3cl1/Tmod2/Kank2/Smad3/Nck1/Arap1/Dbn1/Kiss1r/C530008M17Rik/Asap3/Icam1/Plekhg2/Limch1/Fchsd1/Shank1/Baiap2l1/2610034B18Rik/Prex1/Sh3pxd2b/Cdc42ep4/S100a10/Synpo/Prkce/Ppm1e/Tmsb4x/Cd47/Cfl1/Capg/Sptan1/Gmfg/Ctnna2/Arhgef10	62
GO	BP	GO:0060997	dendritic spine morphogenesis	24/2453	65/17047	5.50728e-06	0.000101842	ENSMUSG00000002489/ENSMUSG00000005958/ENSMUSG00000006699/ENSMUSG00000022623/ENSMUSG00000026235/ENSMUSG00000027954/ENSMUSG00000028613/ENSMUSG00000028664/ENSMUSG00000029245/ENSMUSG00000030309/ENSMUSG00000031302/ENSMUSG00000033389/ENSMUSG00000034675/ENSMUSG00000035064/ENSMUSG00000037541/ENSMUSG00000037855/ENSMUSG00000038453/ENSMUSG00000038738/ENSMUSG00000042453/ENSMUSG00000042589/ENSMUSG00000042700/…	Tiam1/Ephb3/Cdc42/Shank3/Epha4/Efna1/Lrp8/Ephb2/Epha5/Caprin2/Nlgn3/Arhgap44/Dbn1/Eef2k/Shank2/Zfp365/Srcin1/Shank1/Reln/Cux2/Sipa1l1/Cfl1/Camk2b/Nlgn1	24
GO	BP	GO:0048771	tissue remodeling	47/2453	171/17047	5.66945e-06	0.000104515	ENSMUSG00000000957/ENSMUSG00000001131/ENSMUSG00000001750/ENSMUSG00000001847/ENSMUSG00000002602/ENSMUSG00000006445/ENSMUSG00000007655/ENSMUSG00000009681/ENSMUSG00000014361/ENSMUSG00000017631/ENSMUSG00000019066/ENSMUSG00000020122/ENSMUSG00000021457/ENSMUSG00000021702/ENSMUSG00000023031/ENSMUSG00000023951/ENSMUSG00000024621/ENSMUSG00000024659/ENSMUSG00000024743/ENSMUSG00000024781/ENSMUSG00000024913/…	Mmp14/Timp1/Tcirg1/Rac1/Axl/Epha2/Cav1/Bcr/Mertk/Abr/Rab3d/Egfr/Syk/Thbs4/Cela1/Vegfa/Csf1r/Anxa1/Syt7/Lipa/Lrp5/Ltbp3/Itgav/Rassf2/Src/Sema3c/Ncdn/Abcb1b/Cd38/P2rx7/Ptn/Flna/Agt/Ubash3b/Pth1r/Trf/Rac2/Lif/Tgm2/Ctss/Tgfb2/Tmem64/Cd24a/Tmem119/Fcgr4/Acvr2b/Hmgb1	47
GO	CC	GO:0000323	lytic vacuole	91/2474	410/17165	1.20583e-05	0.00010461	ENSMUSG00000000594/ENSMUSG00000001750/ENSMUSG00000002083/ENSMUSG00000002985/ENSMUSG00000003283/ENSMUSG00000003948/ENSMUSG00000004207/ENSMUSG00000004347/ENSMUSG00000004626/ENSMUSG00000005142/ENSMUSG00000005656/ENSMUSG00000006930/ENSMUSG00000007891/ENSMUSG00000009292/ENSMUSG00000015027/ENSMUSG00000015837/ENSMUSG00000016256/ENSMUSG00000016534/ENSMUSG00000018340/ENSMUSG00000018567/ENSMUSG00000018774/…	Gm2a/Tcirg1/Bbc3/Apoe/Hck/Mmd/Psap/Pde1c/Stxbp2/Man2b1/Snx6/Hap1/Ctsd/Trpm2/Galns/Sqstm1/Ctsz/Lamp2/Anxa6/Gabarap/Cd68/Cyb561/Fuca2/Stx7/Slc29a3/Laptm4a/Gfap/Chga/Hexb/Naga/Litaf/Arsa/Dirc2/Rab12/3110002H16Rik/Anxa1/Slc15a3/Syt7/Lipa/Gpr143/Cd63/Ifitm3/Gusb/Itm2c/Capn2/Tmem63a/Cat/Lamp5/Rasgrp1/Src/Ctso/Manba/Tmem55a/Rragd/Laptm5/Fuca1/Rnf19b/Man2b2/Tmem165/Scarb2/Ctsc/Mt1/Pla2g15/Rab27a/Ctsh/Idu…	91
GO	CC	GO:0042611	MHC protein complex	2474-12-01	22/17165	1.23378e-05	0.000105662	ENSMUSG00000016206/ENSMUSG00000026471/ENSMUSG00000035929/ENSMUSG00000036594/ENSMUSG00000060550/ENSMUSG00000060586/ENSMUSG00000060802/ENSMUSG00000061232/ENSMUSG00000067212/ENSMUSG00000073409/ENSMUSG00000073411/ENSMUSG00000073421	H2-M3/Mr1/H2-Q4/H2-Aa/H2-Q7/H2-Eb1/B2m/H2-K1/H2-T23/H2-Q6/H2-D1/H2-Ab1	12
GO	BP	GO:1901216	positive regulation of neuron death	34/2453	109/17047	5.78701e-06	0.000106352	ENSMUSG00000000982/ENSMUSG00000002083/ENSMUSG00000003378/ENSMUSG00000003849/ENSMUSG00000006699/ENSMUSG00000009292/ENSMUSG00000016256/ENSMUSG00000019843/ENSMUSG00000019982/ENSMUSG00000022037/ENSMUSG00000024778/ENSMUSG00000026029/ENSMUSG00000026480/ENSMUSG00000026496/ENSMUSG00000026509/ENSMUSG00000028086/ENSMUSG00000028289/ENSMUSG00000029249/ENSMUSG00000030341/ENSMUSG00000030579/ENSMUSG00000030717/…	Ccl3/Bbc3/Grik5/Nqo1/Cdc42/Trpm2/Ctsz/Fyn/Myb/Clu/Fas/Casp8/Ncf2/Parp1/Capn2/Fbxw7/Epha7/Rest/Tnfrsf1a/Tyrobp/Nupr1/Casp3/Ptprf/Pawr/C1qa/Mcl1/Tlr4/Tgfb2/Picalm/Agrn/Adora1/Jun/Grik2/Map3k5	34
GO	BP	GO:0002711	positive regulation of T cell mediated immunity	22/2453	57/17047	5.8118e-06	0.000106478	ENSMUSG00000016206/ENSMUSG00000019998/ENSMUSG00000020641/ENSMUSG00000022378/ENSMUSG00000024339/ENSMUSG00000026072/ENSMUSG00000026395/ENSMUSG00000029468/ENSMUSG00000031101/ENSMUSG00000035929/ENSMUSG00000037447/ENSMUSG00000037706/ENSMUSG00000040511/ENSMUSG00000047139/ENSMUSG00000056116/ENSMUSG00000060550/ENSMUSG00000060802/ENSMUSG00000061232/ENSMUSG00000062300/ENSMUSG00000067212/ENSMUSG00000073409/…	H2-M3/Stx7/Rsad2/Fam49b/Tap2/Il1r1/Ptprc/P2rx7/Sash3/H2-Q4/Arid5a/Cd81/Pvr/Cd24a/H2-T22/H2-Q7/B2m/H2-K1/Pvrl2/H2-T23/H2-Q6/H2-D1	22
GO	BP	GO:0098598	learned vocalization behavior or vocal learning	2453-08-01	10/17047	6.23668e-06	0.000113911	ENSMUSG00000022623/ENSMUSG00000024109/ENSMUSG00000027168/ENSMUSG00000029563/ENSMUSG00000032327/ENSMUSG00000033768/ENSMUSG00000039419/ENSMUSG00000049625	Shank3/Nrxn1/Pax6/Foxp2/Stra6/Nrxn2/Cntnap2/Tifab	8
GO	BP	GO:0097107	postsynaptic density assembly	2453-12-01	21/17047	6.34464e-06	0.000115527	ENSMUSG00000022623/ENSMUSG00000024109/ENSMUSG00000028399/ENSMUSG00000033768/ENSMUSG00000037541/ENSMUSG00000038738/ENSMUSG00000042453/ENSMUSG00000042700/ENSMUSG00000047085/ENSMUSG00000060780/ENSMUSG00000071424/ENSMUSG00000071862	Shank3/Nrxn1/Ptprd/Nrxn2/Shank2/Shank1/Reln/Sipa1l1/Lrrc4b/Lrrtm1/Grid2/Lrrtm2	12
GO	BP	GO:0002478	antigen processing and presentation of exogenous peptide antigen	2453-11-01	18/17047	6.39926e-06	0.000115811	ENSMUSG00000015947/ENSMUSG00000016206/ENSMUSG00000024308/ENSMUSG00000024339/ENSMUSG00000036594/ENSMUSG00000037321/ENSMUSG00000058715/ENSMUSG00000060802/ENSMUSG00000061232/ENSMUSG00000067212/ENSMUSG00000073421	Fcgr1/H2-M3/Tapbp/Tap2/H2-Aa/Tap1/Fcer1g/B2m/H2-K1/H2-T23/H2-Ab1	11
GO	BP	GO:1900746	regulation of vascular endothelial growth factor signaling pathway	2453-11-01	18/17047	6.39926e-06	0.000115811	ENSMUSG00000014773/ENSMUSG00000017774/ENSMUSG00000019647/ENSMUSG00000022883/ENSMUSG00000023886/ENSMUSG00000025351/ENSMUSG00000026883/ENSMUSG00000031486/ENSMUSG00000053477/ENSMUSG00000054793/ENSMUSG00000059895	Dll1/Myo1c/Sema6a/Robo1/Smoc2/Cd63/Dab2ip/Gpr124/Tcf4/Cadm4/Ptp4a3	11
GO	BP	GO:0044091	membrane biogenesis	17/2453	38/17047	6.43327e-06	0.000116073	ENSMUSG00000004207/ENSMUSG00000007655/ENSMUSG00000013921/ENSMUSG00000024109/ENSMUSG00000024304/ENSMUSG00000028381/ENSMUSG00000028399/ENSMUSG00000028664/ENSMUSG00000029763/ENSMUSG00000031302/ENSMUSG00000033768/ENSMUSG00000040003/ENSMUSG00000041959/ENSMUSG00000059714/ENSMUSG00000061981/ENSMUSG00000063887/ENSMUSG00000069601	Psap/Cav1/Clip3/Nrxn1/Cdh2/Ugcg/Ptprd/Ephb2/Exoc4/Nlgn3/Nrxn2/Magi2/S100a10/Flot1/Flot2/Nlgn1/Ank3	17
GO	CC	GO:0005604	basement membrane	31/2474	99/17165	1.39415e-05	0.000117885	ENSMUSG00000000753/ENSMUSG00000001131/ENSMUSG00000015647/ENSMUSG00000020019/ENSMUSG00000020044/ENSMUSG00000020467/ENSMUSG00000020758/ENSMUSG00000021223/ENSMUSG00000021702/ENSMUSG00000022483/ENSMUSG00000022893/ENSMUSG00000023328/ENSMUSG00000023886/ENSMUSG00000023951/ENSMUSG00000025064/ENSMUSG00000025510/ENSMUSG00000026193/ENSMUSG00000026837/ENSMUSG00000029838/ENSMUSG00000031502/ENSMUSG00000032554/…	Serpinf1/Timp1/Lama5/Ntn4/Timp3/Efemp1/Itgb4/Papln/Thbs4/Col2a1/Adamts1/Ache/Smoc2/Vegfa/Col17a1/Cd151/Fn1/Col5a1/Ptn/Col4a1/Trf/Fras1/Tgfb2/Dag1/Lad1/Agrn/Lamb2/Hmcn2/Col8a2/Frem1/Col8a1	31
GO	BP	GO:0021782	glial cell development	33/2453	105/17047	6.5941e-06	0.000118614	ENSMUSG00000001761/ENSMUSG00000002633/ENSMUSG00000004056/ENSMUSG00000014773/ENSMUSG00000017167/ENSMUSG00000017929/ENSMUSG00000020122/ENSMUSG00000020758/ENSMUSG00000020932/ENSMUSG00000021464/ENSMUSG00000021478/ENSMUSG00000022037/ENSMUSG00000023992/ENSMUSG00000027995/ENSMUSG00000030342/ENSMUSG00000031760/ENSMUSG00000036098/ENSMUSG00000036560/ENSMUSG00000036887/ENSMUSG00000039005/ENSMUSG00000039116/…	Smo/Shh/Akt2/Dll1/Cntnap1/B4galt5/Egfr/Itgb4/Gfap/Ror2/Drd1a/Clu/Trem2/Tlr2/Cd9/Mt3/Myrf/Lgi4/C1qa/Tlr4/Gpr126/Dag1/Adam22/Lyn/Zfp488/Kcnj10/Sh3tc2/Tenm4/C5ar1/Lamb2/Ntrk2/B4galt6/Arhgef10	33
GO	BP	GO:0070372	regulation of ERK1 and ERK2 cascade	71/2453	296/17047	6.6915e-06	0.000120002	ENSMUSG00000000982/ENSMUSG00000002489/ENSMUSG00000002985/ENSMUSG00000004266/ENSMUSG00000005087/ENSMUSG00000005320/ENSMUSG00000006445/ENSMUSG00000007655/ENSMUSG00000018909/ENSMUSG00000018927/ENSMUSG00000019122/ENSMUSG00000019647/ENSMUSG00000019960/ENSMUSG00000019997/ENSMUSG00000020044/ENSMUSG00000020122/ENSMUSG00000020399/ENSMUSG00000020733/ENSMUSG00000021457/ENSMUSG00000021835/ENSMUSG00000023951/…	Ccl3/Tiam1/Apoe/Ptpn6/Cd44/Fgfr4/Epha2/Cav1/Arrb1/Ccl6/Ccl9/Sema6a/Dusp6/Ctgf/Timp3/Egfr/Havcr2/Slc9a3r1/Syk/Bmp4/Vegfa/Trem2/Nrxn1/C3/Spry4/Csf1r/Nrp1/Cflar/Fn1/Ptprc/Atf3/Dab2ip/Notch1/Rasgrp1/Spred1/Ptpn1/Src/Ntrk1/Fbxw7/Cyr61/Epha7/Glipr2/Ephb2/Lmo3/Mt3/Cx3cl1/Necab2/Tirap/Gnai2/Lif/Ccl12/Spry1/Fgf2/Icam1/Nod1/Rras/Akap12/Tlr4/Dusp26/Lrp1/Clcf1/Lyn/P2ry6/C5ar1/Jun/Erbb2/Kdr/Mapk3/Chil1/Hmgb1/…	71
GO	BP	GO:0032411	positive regulation of transporter activity	36/2453	119/17047	6.80067e-06	0.000121593	ENSMUSG00000002588/ENSMUSG00000003352/ENSMUSG00000006930/ENSMUSG00000007021/ENSMUSG00000014077/ENSMUSG00000017400/ENSMUSG00000017412/ENSMUSG00000020704/ENSMUSG00000020723/ENSMUSG00000021313/ENSMUSG00000021835/ENSMUSG00000022623/ENSMUSG00000022965/ENSMUSG00000023992/ENSMUSG00000024065/ENSMUSG00000024907/ENSMUSG00000026961/ENSMUSG00000028207/ENSMUSG00000028664/ENSMUSG00000028854/ENSMUSG00000031302/…	Pon1/Cacnb3/Hap1/Syngr3/Chp1/Stac2/Cacnb4/Asic2/Cacng4/Ryr2/Bmp4/Shank3/Ifngr2/Trem2/Ehd3/Gal/Lrrc26/Asph/Ephb2/Slc9a1/Nlgn3/Htr3a/Plcg2/Pkd2/Kcnc2/Fam115a/Ctss/Reln/S100a1/Kcna1/P2ry6/Amigo1/Prkg1/Cfl1/Kcnc1/Ank3	36
GO	BP	GO:0071709	membrane assembly	15/2453	31/17047	6.85919e-06	0.000122271	ENSMUSG00000004207/ENSMUSG00000007655/ENSMUSG00000024109/ENSMUSG00000024304/ENSMUSG00000028381/ENSMUSG00000028399/ENSMUSG00000028664/ENSMUSG00000031302/ENSMUSG00000033768/ENSMUSG00000040003/ENSMUSG00000041959/ENSMUSG00000059714/ENSMUSG00000061981/ENSMUSG00000063887/ENSMUSG00000069601	Psap/Cav1/Nrxn1/Cdh2/Ugcg/Ptprd/Ephb2/Nlgn3/Nrxn2/Magi2/S100a10/Flot1/Flot2/Nlgn1/Ank3	15
GO	CC	GO:0046658	anchored component of plasma membrane	23/2474	64/17165	1.48245e-05	0.000123784	ENSMUSG00000003617/ENSMUSG00000017314/ENSMUSG00000022780/ENSMUSG00000027954/ENSMUSG00000030350/ENSMUSG00000031119/ENSMUSG00000032725/ENSMUSG00000034220/ENSMUSG00000039714/ENSMUSG00000040972/ENSMUSG00000040987/ENSMUSG00000045287/ENSMUSG00000047139/ENSMUSG00000047945/ENSMUSG00000050896/ENSMUSG00000051439/ENSMUSG00000052572/ENSMUSG00000052957/ENSMUSG00000055022/ENSMUSG00000055653/ENSMUSG00000058571/…	Cp/Mpp2/Mfi2/Efna1/Prmt8/Gpc4/Folr2/Gpc1/Cplx3/Igsf21/Mill2/Rtn4rl1/Cd24a/Marcksl1/Rtn4rl2/Cd14/Dlg2/Gas1/Cntn1/Gpc3/Gpc6/Flot2/Cd59b	23
GO	CC	GO:0044295	axonal growth cone	17/2474	40/17165	1.52211e-05	0.000125527	ENSMUSG00000001761/ENSMUSG00000002489/ENSMUSG00000020173/ENSMUSG00000021068/ENSMUSG00000022687/ENSMUSG00000024109/ENSMUSG00000026235/ENSMUSG00000026764/ENSMUSG00000026833/ENSMUSG00000027223/ENSMUSG00000030447/ENSMUSG00000031517/ENSMUSG00000034675/ENSMUSG00000040249/ENSMUSG00000041936/ENSMUSG00000051379/ENSMUSG00000058056	Smo/Tiam1/Cobl/Nin/Boc/Nrxn1/Epha4/Kif5c/Olfm1/Mapk8ip1/Cyfip1/Gpm6a/Dbn1/Lrp1/Agrn/Flrt3/Palld	17
GO	MF	GO:0004713	protein tyrosine kinase activity	38/2478	123/17092	2.61706e-06	0.000132099	ENSMUSG00000000409/ENSMUSG00000002602/ENSMUSG00000003283/ENSMUSG00000003534/ENSMUSG00000005320/ENSMUSG00000005958/ENSMUSG00000006445/ENSMUSG00000009376/ENSMUSG00000014361/ENSMUSG00000019843/ENSMUSG00000020122/ENSMUSG00000020467/ENSMUSG00000021457/ENSMUSG00000021464/ENSMUSG00000022372/ENSMUSG00000022451/ENSMUSG00000024079/ENSMUSG00000024621/ENSMUSG00000025810/ENSMUSG00000025969/ENSMUSG00000026235/…	Lck/Axl/Hck/Ddr1/Fgfr4/Ephb3/Epha2/Met/Mertk/Fyn/Egfr/Efemp1/Syk/Ror2/Sla/Twf1/Eif2ak2/Csf1r/Nrp1/Nrp2/Epha4/Src/Ntrk1/Epha7/Ephb2/Fgr/Epha10/Epha5/Flt1/Fgfr1/Jak3/Tyk2/Lyn/Flt3/Ntrk2/Alk/Erbb2/Kdr	38
GO	BP	GO:1905477	positive regulation of protein localization to membrane	32/2453	101/17047	7.49306e-06	0.00013317	ENSMUSG00000001507/ENSMUSG00000002083/ENSMUSG00000003352/ENSMUSG00000004056/ENSMUSG00000006445/ENSMUSG00000013921/ENSMUSG00000014077/ENSMUSG00000015837/ENSMUSG00000017400/ENSMUSG00000017774/ENSMUSG00000019843/ENSMUSG00000020122/ENSMUSG00000021057/ENSMUSG00000023992/ENSMUSG00000024109/ENSMUSG00000026880/ENSMUSG00000028664/ENSMUSG00000028785/ENSMUSG00000029838/ENSMUSG00000029851/ENSMUSG00000030098/…	Itga3/Bbc3/Cacnb3/Akt2/Epha2/Clip3/Chp1/Sqstm1/Stac2/Myo1c/Fyn/Egfr/Akap5/Trem2/Nrxn1/Stom/Ephb2/Hpca/Ptn/Fam115c/Grip2/Necab2/Acsl3/Fam115a/Cd81/Ppp1r9b/Lrp1/Pls1/Lgals3/Dpp6/Erbb2/Ank3	32
GO	BP	GO:0051928	positive regulation of calcium ion transport	38/2453	129/17047	7.66572e-06	0.000135832	ENSMUSG00000000617/ENSMUSG00000000982/ENSMUSG00000003161/ENSMUSG00000003352/ENSMUSG00000006930/ENSMUSG00000007655/ENSMUSG00000015968/ENSMUSG00000016933/ENSMUSG00000017400/ENSMUSG00000017412/ENSMUSG00000019943/ENSMUSG00000021057/ENSMUSG00000021313/ENSMUSG00000021478/ENSMUSG00000021835/ENSMUSG00000024065/ENSMUSG00000026385/ENSMUSG00000026959/ENSMUSG00000028207/ENSMUSG00000028854/ENSMUSG00000029468/…	Grm6/Ccl3/Sri/Cacnb3/Hap1/Cav1/Cacna1d/Plcg1/Stac2/Cacnb4/Atp2b1/Akap5/Ryr2/Drd1a/Bmp4/Ehd3/Dbi/Grin1/Asph/Slc9a1/P2rx7/P2rx4/Itpr1/Atp2b2/Cx3cl1/Plcg2/Pkd2/Cxcl10/Ccl12/Wfs1/Tspo/S100a1/P2ry6/Orai1/Mchr1/Lgals3/Cacna1c/Capn3	38
GO	BP	GO:0048754	branching morphogenesis of an epithelial tube	44/2453	158/17047	7.72021e-06	0.00013639	ENSMUSG00000000567/ENSMUSG00000000957/ENSMUSG00000001761/ENSMUSG00000002633/ENSMUSG00000003534/ENSMUSG00000004791/ENSMUSG00000006445/ENSMUSG00000009376/ENSMUSG00000014599/ENSMUSG00000015647/ENSMUSG00000016256/ENSMUSG00000017724/ENSMUSG00000021318/ENSMUSG00000021782/ENSMUSG00000021835/ENSMUSG00000023951/ENSMUSG00000024176/ENSMUSG00000024913/ENSMUSG00000025810/ENSMUSG00000025921/ENSMUSG00000026556/…	Sox9/Mmp14/Smo/Shh/Ddr1/Pgf/Epha2/Met/Csf1/Lama5/Ctsz/Etv4/Gli3/Dlg5/Bmp4/Vegfa/Sox8/Lrp5/Nrp1/Rdh10/Vangl2/Acvr1/Notch1/Src/Tfap2c/Areg/Plxnd1/Col4a1/Slit2/Agt/Ctsh/Tgfbr2/Pkd1/Pkd2/Dchs1/Spry1/Fgf2/Dag1/Timeless/Cited1/Yap1/Gpc3/Sema3e/Nrarp	44
GO	BP	GO:1903708	positive regulation of hemopoiesis	50/2453	188/17047	7.9454e-06	0.000139952	ENSMUSG00000000409/ENSMUSG00000000957/ENSMUSG00000000982/ENSMUSG00000001123/ENSMUSG00000002602/ENSMUSG00000002633/ENSMUSG00000004040/ENSMUSG00000007817/ENSMUSG00000014599/ENSMUSG00000016206/ENSMUSG00000016493/ENSMUSG00000018899/ENSMUSG00000019982/ENSMUSG00000020101/ENSMUSG00000020919/ENSMUSG00000021127/ENSMUSG00000021318/ENSMUSG00000021457/ENSMUSG00000021464/ENSMUSG00000021686/ENSMUSG00000022488/…	Lck/Mmp14/Ccl3/Lgals9/Axl/Shh/Stat3/Zmiz1/Csf1/H2-M3/Cd46/Irf1/Myb/4632428N05Rik/Stat5b/Zfp36l1/Gli3/Syk/Ror2/Ap3b1/Nckap1l/Bcl6/Runx1/Il15ra/Trem2/Csf1r/Anxa1/Casp8/Stat1/Ptprc/Rasgrp1/Il21/Tyrobp/Il4ra/Sash3/Il34/Ets1/Tgfbr2/Trib1/Lif/Nfkbiz/Tnfsf9/Isg15/H2-Aa/Klf10/Tox/Tmem64/Jun/5430435G22Rik/Hmgb1	50
GO	BP	GO:0021953	central nervous system neuron differentiation	48/2453	178/17047	7.98629e-06	0.000140256	ENSMUSG00000001521/ENSMUSG00000001761/ENSMUSG00000001847/ENSMUSG00000001911/ENSMUSG00000002633/ENSMUSG00000005045/ENSMUSG00000005958/ENSMUSG00000008575/ENSMUSG00000017929/ENSMUSG00000019803/ENSMUSG00000020262/ENSMUSG00000021068/ENSMUSG00000021318/ENSMUSG00000021478/ENSMUSG00000021557/ENSMUSG00000022623/ENSMUSG00000022883/ENSMUSG00000023011/ENSMUSG00000024109/ENSMUSG00000024621/ENSMUSG00000025810/…	Tulp3/Smo/Rac1/Nfix/Shh/Chd5/Ephb3/Nfib/B4galt5/Nr2e1/Adarb1/Nin/Gli3/Drd1a/Agtpbp1/Shank3/Robo1/Faim2/Nrxn1/Csf1r/Nrp1/Nrp2/Epha4/Nr4a2/Zeb2/Slc4a10/Lhx3/Pax6/Dclk2/Lmo4/Tfap2c/Ephb2/Plxna4/Atp2b2/Ophn1/Plxna3/Slit2/Fgfr1/Cdh11/Cacna1a/Atf5/Isl1/Ntrk2/B4galt6/Cend1/B2m/Unc5d/Grid2	48
GO	BP	GO:0001913	T cell mediated cytotoxicity	21/2453	54/17047	8.20685e-06	0.000143705	ENSMUSG00000016206/ENSMUSG00000019998/ENSMUSG00000022378/ENSMUSG00000024339/ENSMUSG00000026395/ENSMUSG00000029468/ENSMUSG00000030560/ENSMUSG00000032202/ENSMUSG00000032359/ENSMUSG00000035929/ENSMUSG00000040511/ENSMUSG00000040987/ENSMUSG00000056116/ENSMUSG00000060550/ENSMUSG00000060802/ENSMUSG00000061232/ENSMUSG00000062300/ENSMUSG00000067212/ENSMUSG00000073409/ENSMUSG00000073411/ENSMUSG00000075297	H2-M3/Stx7/Fam49b/Tap2/Ptprc/P2rx7/Ctsc/Rab27a/Ctsh/H2-Q4/Pvr/Mill2/H2-T22/H2-Q7/B2m/H2-K1/Pvrl2/H2-T23/H2-Q6/H2-D1/H60b	21
GO	BP	GO:0051222	positive regulation of protein transport	91/2453	407/17047	8.29247e-06	0.000144777	ENSMUSG00000000982/ENSMUSG00000001123/ENSMUSG00000001761/ENSMUSG00000001847/ENSMUSG00000002633/ENSMUSG00000002897/ENSMUSG00000003161/ENSMUSG00000003352/ENSMUSG00000004056/ENSMUSG00000006699/ENSMUSG00000009292/ENSMUSG00000014077/ENSMUSG00000015401/ENSMUSG00000015968/ENSMUSG00000016150/ENSMUSG00000016496/ENSMUSG00000017774/ENSMUSG00000018909/ENSMUSG00000019843/ENSMUSG00000020122/ENSMUSG00000020399/…	Ccl3/Lgals9/Smo/Rac1/Shh/Il17ra/Sri/Cacnb3/Akt2/Cdc42/Trpm2/Chp1/Tmem27/Cacna1d/Tenm1/Cd274/Myo1c/Arrb1/Fyn/Egfr/Havcr2/Akap5/Gli3/Syk/Oxct1/Gsdmd/Trem2/Aif1/Csf1r/Il33/Frmd8/Casp1/Rab29/Sec16b/Frmd4a/Stom/Ifih1/Rasgrp1/Src/Tlr2/Fbxw7/Asph/Hpca/Fgr/Nadk/Cd38/P2rx7/Fam115c/Clec5a/Camk1/Ipo5/Il4ra/Bag3/Ano1/Flna/Chrm1/Prr5l/Acsl3/Pfkm/BC018507/Cd276/Fam115a/Hk1/Arid5a/Cd81/Akap12/Tlr4/Tgfb2/Lrp1/Dd…	91
GO	BP	GO:0071900	regulation of protein serine/threonine kinase activity	96/2453	435/17047	8.38867e-06	0.000146027	ENSMUSG00000000346/ENSMUSG00000001123/ENSMUSG00000002489/ENSMUSG00000002985/ENSMUSG00000003423/ENSMUSG00000004266/ENSMUSG00000004451/ENSMUSG00000007655/ENSMUSG00000015305/ENSMUSG00000015312/ENSMUSG00000018334/ENSMUSG00000018909/ENSMUSG00000019960/ENSMUSG00000020122/ENSMUSG00000020227/ENSMUSG00000020312/ENSMUSG00000020573/ENSMUSG00000020612/ENSMUSG00000020901/ENSMUSG00000020941/ENSMUSG00000021453/…	Dazap2/Lgals9/Tiam1/Apoe/Pih1d1/Ptpn6/Ralb/Cav1/Sash1/Gadd45b/Ksr1/Arrb1/Dusp6/Egfr/Irak3/Shc2/Pik3cg/Prkar1a/Pik3r5/Map3k14/Gadd45g/Syk/Ror2/Bmp4/Lats2/Ajuba/Robo1/Vegfa/Fgd2/Pim1/Eif2ak2/Nrxn1/Map3k8/Spry4/Csf1r/Lrp5/Plce1/Ptprj/Epha4/Ptprc/Atp2b4/Vangl2/Zeb2/Dab2ip/Mapk8ip1/Rasgrp1/Spred1/Pkia/Ptpn1/Src/Cdkn2c/Ephb2/Map3k6/Ccng2/P2rx7/Flt1/Tgfa/Dusp16/Camk1/Nr2f2/Irak1/Fgfr1/Casp3/Gab1/Parp16/…	96
GO	BP	GO:0050954	sensory perception of mechanical stimulus	44/2453	159/17047	9.20721e-06	0.000159807	ENSMUSG00000002799/ENSMUSG00000003352/ENSMUSG00000004207/ENSMUSG00000005360/ENSMUSG00000007653/ENSMUSG00000014686/ENSMUSG00000015533/ENSMUSG00000015968/ENSMUSG00000019843/ENSMUSG00000020704/ENSMUSG00000020733/ENSMUSG00000020953/ENSMUSG00000021665/ENSMUSG00000022483/ENSMUSG00000025813/ENSMUSG00000026249/ENSMUSG00000027254/ENSMUSG00000027966/ENSMUSG00000028072/ENSMUSG00000028631/ENSMUSG00000029470/…	Jag2/Cacnb3/Psap/Slc1a3/Gabrb2/Ceacam16/Itga2/Cacna1d/Fyn/Asic2/Slc9a3r1/Coch/Hexb/Col2a1/Homer2/Serpine2/Map1a/Col11a1/Ntrk1/Kcnq4/P2rx4/Dfna5/Lrig1/Atp2b2/Myh14/Crym/Fgfr1/Casp3/Triobp/Gabrb3/Pawr/Icam1/Sobp/Tlr4/Wfs1/Atp8b1/Mbp/Clrn1/Kcna1/Nav2/Grm7/Serpinb6a/Gpx1/Srrm4	44
GO	BP	GO:0002768	immune response-regulating cell surface receptor signaling pathway	48/2453	179/17047	9.41083e-06	0.000162865	ENSMUSG00000000409/ENSMUSG00000000732/ENSMUSG00000002699/ENSMUSG00000003352/ENSMUSG00000004266/ENSMUSG00000005057/ENSMUSG00000015947/ENSMUSG00000016206/ENSMUSG00000016933/ENSMUSG00000017412/ENSMUSG00000019843/ENSMUSG00000020437/ENSMUSG00000021457/ENSMUSG00000022148/ENSMUSG00000022488/ENSMUSG00000023915/ENSMUSG00000024927/ENSMUSG00000025314/ENSMUSG00000026395/ENSMUSG00000026433/ENSMUSG00000027544/…	Lck/Icosl/Lcp2/Cacnb3/Ptpn6/Sh2b2/Fcgr1/H2-M3/Plcg1/Cacnb4/Fyn/Myo1g/Syk/Fyb/Nckap1l/Tnfrsf21/Rela/Ptprj/Ptprc/Rab29/Nfatc2/Pde4b/Cd38/Cd22/Cmtm3/Plscr1/Vav3/Plcg2/Nfkbiz/Pawr/Cd276/Cd81/Themis2/Plcl2/Plekha1/C3ar1/Mill2/Cmklr1/Lyn/Klhl6/Rnf31/C5ar1/Prkcb/Cd47/Fcer1g/Fcgr4/Pvrl2/C5ar2	48
GO	CC	GO:0042612	MHC class I protein complex	2474-08-01	11/17165	2.02101e-05	0.000164638	ENSMUSG00000026471/ENSMUSG00000035929/ENSMUSG00000060550/ENSMUSG00000060802/ENSMUSG00000061232/ENSMUSG00000067212/ENSMUSG00000073409/ENSMUSG00000073411	Mr1/H2-Q4/H2-Q7/B2m/H2-K1/H2-T23/H2-Q6/H2-D1	8
GO	BP	GO:1902105	regulation of leukocyte differentiation	65/2453	267/17047	9.69587e-06	0.00016731	ENSMUSG00000000409/ENSMUSG00000000693/ENSMUSG00000000957/ENSMUSG00000000982/ENSMUSG00000001123/ENSMUSG00000002602/ENSMUSG00000002633/ENSMUSG00000004266/ENSMUSG00000007817/ENSMUSG00000014599/ENSMUSG00000016206/ENSMUSG00000016493/ENSMUSG00000018899/ENSMUSG00000019982/ENSMUSG00000020101/ENSMUSG00000020919/ENSMUSG00000021127/ENSMUSG00000021318/ENSMUSG00000021457/ENSMUSG00000021464/ENSMUSG00000021686/…	Lck/Loxl3/Mmp14/Ccl3/Lgals9/Axl/Shh/Ptpn6/Zmiz1/Csf1/H2-M3/Cd46/Irf1/Myb/4632428N05Rik/Stat5b/Zfp36l1/Gli3/Syk/Ror2/Ap3b1/Bmp4/Nckap1l/Bcl6/Runx1/Il15ra/Tmem176a/Trem2/Csf1r/Anxa1/Fas/Casp8/Ptprc/Rassf2/Rasgrp1/Il21/Fbxw7/Dtx1/Tmem176b/Lag3/Clec2d/Tyrobp/Il4ra/Sash3/Il34/Ubash3b/Tgfbr2/Trib1/Lif/Nfkbiz/Tnfsf9/H2-Aa/C1qc/Klf10/Fgl2/Tox/Lyn/Tmem64/Rbp1/Cd24a/Jun/Zfp608/Cebpb/Erbb2/Nrarp	65
GO	BP	GO:0002705	positive regulation of leukocyte mediated immunity	40/2453	140/17047	1.00963e-05	0.000173715	ENSMUSG00000002147/ENSMUSG00000004626/ENSMUSG00000015947/ENSMUSG00000016206/ENSMUSG00000019998/ENSMUSG00000020641/ENSMUSG00000020828/ENSMUSG00000020919/ENSMUSG00000021457/ENSMUSG00000022378/ENSMUSG00000024164/ENSMUSG00000024339/ENSMUSG00000026072/ENSMUSG00000026395/ENSMUSG00000027347/ENSMUSG00000027718/ENSMUSG00000028874/ENSMUSG00000029468/ENSMUSG00000030124/ENSMUSG00000030748/ENSMUSG00000031101/…	Stat6/Stxbp2/Fcgr1/H2-M3/Stx7/Rsad2/Pld2/Stat5b/Syk/Fam49b/C3/Tap2/Il1r1/Ptprc/Rasgrp1/Il21/Fgr/P2rx7/Lag3/Il4ra/Sash3/Vav1/H2-Q4/Arid5a/Cd81/Ddx58/Pvr/Clcf1/Mill2/Cd24a/H2-T22/Fcer1g/H2-Q7/B2m/H2-K1/Pvrl2/H2-T23/H2-Q6/H2-D1/H60b	40
GO	BP	GO:0050868	negative regulation of T cell activation	33/2453	107/17047	1.03204e-05	0.000177057	ENSMUSG00000000693/ENSMUSG00000001123/ENSMUSG00000002633/ENSMUSG00000004266/ENSMUSG00000016206/ENSMUSG00000016496/ENSMUSG00000018899/ENSMUSG00000020101/ENSMUSG00000020399/ENSMUSG00000020612/ENSMUSG00000021318/ENSMUSG00000021782/ENSMUSG00000021835/ENSMUSG00000022508/ENSMUSG00000022901/ENSMUSG00000023915/ENSMUSG00000024659/ENSMUSG00000027508/ENSMUSG00000029603/ENSMUSG00000030124/ENSMUSG00000030748/…	Loxl3/Lgals9/Shh/Ptpn6/H2-M3/Cd274/Irf1/4632428N05Rik/Havcr2/Prkar1a/Gli3/Dlg5/Bmp4/Bcl6/Cd86/Tnfrsf21/Anxa1/Pag1/Dtx1/Lag3/Il4ra/Casp3/Pawr/Cd276/H2-Aa/Fgl2/Tnfrsf14/Cd24a/Zfp608/Cebpb/Erbb2/H2-Ab1/Nrarp	33
GO	BP	GO:1904951	positive regulation of establishment of protein localization	94/2453	426/17047	1.04439e-05	0.00017866	ENSMUSG00000000982/ENSMUSG00000001123/ENSMUSG00000001761/ENSMUSG00000001847/ENSMUSG00000002083/ENSMUSG00000002633/ENSMUSG00000002897/ENSMUSG00000003161/ENSMUSG00000003352/ENSMUSG00000004056/ENSMUSG00000006699/ENSMUSG00000009292/ENSMUSG00000014077/ENSMUSG00000015401/ENSMUSG00000015968/ENSMUSG00000016150/ENSMUSG00000016496/ENSMUSG00000017774/ENSMUSG00000018909/ENSMUSG00000019843/ENSMUSG00000020122/…	Ccl3/Lgals9/Smo/Rac1/Bbc3/Shh/Il17ra/Sri/Cacnb3/Akt2/Cdc42/Trpm2/Chp1/Tmem27/Cacna1d/Tenm1/Cd274/Myo1c/Arrb1/Fyn/Egfr/Havcr2/Akap5/Gli3/Syk/Oxct1/Gsdmd/Trem2/Aif1/Csf1r/Il33/Frmd8/Casp1/Rab29/Sec16b/Frmd4a/Stom/Ifih1/Rasgrp1/Src/Tlr2/Fbxw7/Asph/Hpca/Fgr/Nadk/Cd38/P2rx7/Fam115c/Clec5a/Camk1/Ipo5/Il4ra/Bag3/Ano1/Flna/Chrm1/Prr5l/Acsl3/Pfkm/BC018507/Cd276/Fam115a/Hk1/Arid5a/Cd81/Akap12/Tlr4/Tgfb2/Lr…	94
GO	CC	GO:0043679	axon terminus	44/2474	164/17165	2.23601e-05	0.000179959	ENSMUSG00000000263/ENSMUSG00000001985/ENSMUSG00000001986/ENSMUSG00000003161/ENSMUSG00000003378/ENSMUSG00000004113/ENSMUSG00000004319/ENSMUSG00000006930/ENSMUSG00000015533/ENSMUSG00000019823/ENSMUSG00000021478/ENSMUSG00000023052/ENSMUSG00000024743/ENSMUSG00000025892/ENSMUSG00000026235/ENSMUSG00000026904/ENSMUSG00000026959/ENSMUSG00000027712/ENSMUSG00000029470/ENSMUSG00000030447/ENSMUSG00000030669/…	Glra1/Grik3/Gria3/Sri/Grik5/Cacna1b/Clcn3/Hap1/Itga2/Mical1/Drd1a/Npff/Syt7/Gria4/Epha4/Slc4a10/Grin1/Anxa5/P2rx4/Cyfip1/Calca/Rgs10/Ophn1/Chrm1/Gabrb3/Sncb/Tanc1/Kcnc2/Cdh8/Dgki/Cplx3/Blvrb/Adora1/Chrm3/Kcna1/Sept6/Flrt3/Prkcb/Ntrk2/Grik2/Ptprn2/Grm7/Kcnc1/Syt11	44
GO	BP	GO:0048525	negative regulation of viral process	29/2453	89/17047	1.07755e-05	0.000183802	ENSMUSG00000000266/ENSMUSG00000000275/ENSMUSG00000000982/ENSMUSG00000001166/ENSMUSG00000009585/ENSMUSG00000020641/ENSMUSG00000022043/ENSMUSG00000023341/ENSMUSG00000024079/ENSMUSG00000025034/ENSMUSG00000025491/ENSMUSG00000025492/ENSMUSG00000026104/ENSMUSG00000028800/ENSMUSG00000029249/ENSMUSG00000029561/ENSMUSG00000029826/ENSMUSG00000030966/ENSMUSG00000032369/ENSMUSG00000035692/ENSMUSG00000038884/…	Mid2/Trim25/Ccl3/Oas1c/Apobec3/Rsad2/Trim35/Mx2/Eif2ak2/Trim8/Ifitm1/Ifitm3/Stat1/Hdac1/Rest/Oasl2/Zc3hav1/Trim21/Plscr1/Isg15/A230050P20Rik/Trim62/Oasl1/Zfp36/Bst2/Trim32/Jun/Oas1a/Zfp809	29
GO	CC	GO:0009925	basal plasma membrane	18/2474	45/17165	2.34202e-05	0.000186246	ENSMUSG00000007655/ENSMUSG00000009376/ENSMUSG00000017774/ENSMUSG00000020122/ENSMUSG00000020758/ENSMUSG00000028631/ENSMUSG00000030737/ENSMUSG00000032554/ENSMUSG00000032988/ENSMUSG00000034462/ENSMUSG00000036353/ENSMUSG00000039115/ENSMUSG00000044217/ENSMUSG00000057182/ENSMUSG00000062312/ENSMUSG00000069601/ENSMUSG00000073639/ENSMUSG00000074361	Cav1/Met/Myo1c/Egfr/Itgb4/Kcnq4/Slco2b1/Trf/Slc16a8/Pkd2/P2ry12/Itga9/Aqp5/Scn3a/Erbb2/Ank3/Rab18/C5ar2	18
GO	MF	GO:0017154	semaphorin receptor activity	2478-09-01	12/17092	4.05066e-06	0.000187349	ENSMUSG00000009376/ENSMUSG00000025810/ENSMUSG00000025969/ENSMUSG00000026640/ENSMUSG00000029765/ENSMUSG00000030084/ENSMUSG00000030123/ENSMUSG00000031398/ENSMUSG00000036606	Met/Nrp1/Nrp2/Plxna2/Plxna4/Plxna1/Plxnd1/Plxna3/Plxnb2	9
GO	MF	GO:0003924	GTPase activity	71/2478	290/17092	4.06512e-06	0.000187349	ENSMUSG00000000001/ENSMUSG00000000386/ENSMUSG00000001473/ENSMUSG00000001847/ENSMUSG00000002233/ENSMUSG00000004451/ENSMUSG00000006699/ENSMUSG00000010086/ENSMUSG00000011148/ENSMUSG00000017144/ENSMUSG00000018398/ENSMUSG00000019066/ENSMUSG00000020132/ENSMUSG00000020175/ENSMUSG00000020684/ENSMUSG00000021589/ENSMUSG00000022456/ENSMUSG00000022722/ENSMUSG00000023341/ENSMUSG00000023439/ENSMUSG00000023460/…	Gnai3/Mx1/Tubb6/Rac1/Rhoc/Ralb/Cdc42/Rnf112/Adssl1/Rnd3/Sept8/Rab3d/Rab21/Rab36/Rasl10b/Rhobtb3/Sept3/Arl6/Mx2/Gnb3/Rab12/Rhoq/Gna14/Rab29/Rab13/Gem/Gbp3/Gbp2/Rragd/Rhoh/Gbp9/Rab35/Gnb2/Tuba8/Rerg/Gnao1/Srpr/Rab27a/Mras/Gnai2/Rac2/Gna15/Gng12/Rab8b/Eef1a1/Rras/Rhou/Gbp7/Gbp5/Tubb2b/Rhoj/Irgm1/Diras2/Sept6/5430435G22Rik/Iigp1/Rras2/Rab31/Rit2/Gnai1/Sept11/Tubb2a/Sept9/Irgm2/Gspt2/Gm4951/Rab18/Igtp…	71
GO	BP	GO:0002456	T cell mediated immunity	34/2453	112/17047	1.11544e-05	0.000189179	ENSMUSG00000016206/ENSMUSG00000016493/ENSMUSG00000019998/ENSMUSG00000020101/ENSMUSG00000020437/ENSMUSG00000020641/ENSMUSG00000022378/ENSMUSG00000024339/ENSMUSG00000026072/ENSMUSG00000026395/ENSMUSG00000028599/ENSMUSG00000029468/ENSMUSG00000030560/ENSMUSG00000031101/ENSMUSG00000031165/ENSMUSG00000032202/ENSMUSG00000032359/ENSMUSG00000035929/ENSMUSG00000037405/ENSMUSG00000037447/ENSMUSG00000037706/…	H2-M3/Cd46/Stx7/4632428N05Rik/Myo1g/Rsad2/Fam49b/Tap2/Il1r1/Ptprc/Tnfrsf1b/P2rx7/Ctsc/Sash3/Was/Rab27a/Ctsh/H2-Q4/Icam1/Arid5a/Cd81/Pvr/Mill2/Cd24a/H2-T22/H2-Q7/B2m/H2-K1/Pvrl2/Hmgb1/H2-T23/H2-Q6/H2-D1/H60b	34
GO	BP	GO:0032414	positive regulation of ion transmembrane transporter activity	34/2453	112/17047	1.11544e-05	0.000189179	ENSMUSG00000003352/ENSMUSG00000006930/ENSMUSG00000014077/ENSMUSG00000017400/ENSMUSG00000017412/ENSMUSG00000020704/ENSMUSG00000020723/ENSMUSG00000021313/ENSMUSG00000021835/ENSMUSG00000022623/ENSMUSG00000022965/ENSMUSG00000023992/ENSMUSG00000024065/ENSMUSG00000024907/ENSMUSG00000026961/ENSMUSG00000028207/ENSMUSG00000028664/ENSMUSG00000028854/ENSMUSG00000031302/ENSMUSG00000032269/ENSMUSG00000034330/…	Cacnb3/Hap1/Chp1/Stac2/Cacnb4/Asic2/Cacng4/Ryr2/Bmp4/Shank3/Ifngr2/Trem2/Ehd3/Gal/Lrrc26/Asph/Ephb2/Slc9a1/Nlgn3/Htr3a/Plcg2/Pkd2/Kcnc2/Fam115a/Ctss/Reln/S100a1/Kcna1/P2ry6/Amigo1/Prkg1/Cfl1/Kcnc1/Ank3	34
GO	BP	GO:0031343	positive regulation of cell killing	26/2453	76/17047	1.14015e-05	0.000192612	ENSMUSG00000016206/ENSMUSG00000019998/ENSMUSG00000020919/ENSMUSG00000021457/ENSMUSG00000022378/ENSMUSG00000024339/ENSMUSG00000026395/ENSMUSG00000027347/ENSMUSG00000027718/ENSMUSG00000029468/ENSMUSG00000030124/ENSMUSG00000030579/ENSMUSG00000034116/ENSMUSG00000035929/ENSMUSG00000040511/ENSMUSG00000040987/ENSMUSG00000056116/ENSMUSG00000060550/ENSMUSG00000060802/ENSMUSG00000061232/ENSMUSG00000062300/…	H2-M3/Stx7/Stat5b/Syk/Fam49b/Tap2/Ptprc/Rasgrp1/Il21/P2rx7/Lag3/Tyrobp/Vav1/H2-Q4/Pvr/Mill2/H2-T22/H2-Q7/B2m/H2-K1/Pvrl2/H2-T23/H2-Q6/H2-D1/H60b/Ccr5	26
GO	BP	GO:0000768	syncytium formation by plasma membrane fusion	21/2453	55/17047	1.14867e-05	0.000192612	ENSMUSG00000015745/ENSMUSG00000022443/ENSMUSG00000023992/ENSMUSG00000025888/ENSMUSG00000026031/ENSMUSG00000026509/ENSMUSG00000027544/ENSMUSG00000030272/ENSMUSG00000030342/ENSMUSG00000030579/ENSMUSG00000030748/ENSMUSG00000034730/ENSMUSG00000034855/ENSMUSG00000035168/ENSMUSG00000035673/ENSMUSG00000037706/ENSMUSG00000040747/ENSMUSG00000048612/ENSMUSG00000053617/ENSMUSG00000059714/ENSMUSG00000074364	Plekho1/Myh9/Trem2/Casp1/Cflar/Capn2/Nfatc2/Camk1/Cd9/Tyrobp/Il4ra/Bai1/Cxcl10/Tanc1/Sbno2/Cd81/Cd53/Myof/Sh3pxd2a/Flot1/Ehd2	21
GO	BP	GO:0042267	natural killer cell mediated cytotoxicity	21/2453	55/17047	1.14867e-05	0.000192612	ENSMUSG00000001123/ENSMUSG00000004266/ENSMUSG00000016206/ENSMUSG00000020399/ENSMUSG00000020919/ENSMUSG00000024339/ENSMUSG00000027347/ENSMUSG00000027718/ENSMUSG00000028691/ENSMUSG00000028793/ENSMUSG00000030124/ENSMUSG00000030157/ENSMUSG00000032202/ENSMUSG00000034116/ENSMUSG00000037321/ENSMUSG00000040511/ENSMUSG00000040987/ENSMUSG00000048583/ENSMUSG00000062300/ENSMUSG00000067212/ENSMUSG00000075297	Lgals9/Ptpn6/H2-M3/Havcr2/Stat5b/Tap2/Rasgrp1/Il21/Prdx1/Rnf19b/Lag3/Clec2d/Rab27a/Vav1/Tap1/Pvr/Mill2/Igf2/Pvrl2/H2-T23/H60b	21
GO	BP	GO:0140253	cell-cell fusion	21/2453	55/17047	1.14867e-05	0.000192612	ENSMUSG00000015745/ENSMUSG00000022443/ENSMUSG00000023992/ENSMUSG00000025888/ENSMUSG00000026031/ENSMUSG00000026509/ENSMUSG00000027544/ENSMUSG00000030272/ENSMUSG00000030342/ENSMUSG00000030579/ENSMUSG00000030748/ENSMUSG00000034730/ENSMUSG00000034855/ENSMUSG00000035168/ENSMUSG00000035673/ENSMUSG00000037706/ENSMUSG00000040747/ENSMUSG00000048612/ENSMUSG00000053617/ENSMUSG00000059714/ENSMUSG00000074364	Plekho1/Myh9/Trem2/Casp1/Cflar/Capn2/Nfatc2/Camk1/Cd9/Tyrobp/Il4ra/Bai1/Cxcl10/Tanc1/Sbno2/Cd81/Cd53/Myof/Sh3pxd2a/Flot1/Ehd2	21
GO	BP	GO:0016049	cell growth	103/2453	478/17047	1.18161e-05	0.000197579	ENSMUSG00000000247/ENSMUSG00000000567/ENSMUSG00000000627/ENSMUSG00000000861/ENSMUSG00000000957/ENSMUSG00000001227/ENSMUSG00000001288/ENSMUSG00000001761/ENSMUSG00000002083/ENSMUSG00000002489/ENSMUSG00000002985/ENSMUSG00000003534/ENSMUSG00000005202/ENSMUSG00000006519/ENSMUSG00000009073/ENSMUSG00000015829/ENSMUSG00000019647/ENSMUSG00000019970/ENSMUSG00000020027/ENSMUSG00000020122/ENSMUSG00000020132/…	Lhx2/Sox9/Sema4f/Bcl11a/Mmp14/Sema6b/Rarg/Smo/Bbc3/Tiam1/Apoe/Ddr1/Shbg/Cyba/Nf2/Tnr/Sema6a/Sgk1/Socs2/Egfr/Rab21/Cobl/Nin/Sema4d/Cpne6/Bcl6/Fhl1/Tnfrsf12a/Vegfa/Epb4.1l3/Syt4/Hbegf/Gal/Sema4g/Kazald1/Tro/Ptprj/Nrp1/Nrp2/Fn1/Serpine2/Syt2/Olfm1/Zeb2/Dab2ip/Frzb/Itga4/Ttl/Adam15/Sdcbp/Epha7/Cdkn2c/Sema3c/Slc9a1/Cd38/Auts2/Plxna4/Plxna1/Emp1/Rerg/Caprin2/Cyfip1/Syt3/Cttn/Cdkl5/Nlgn3/Plxna3/Slit2/So…	103
GO	MF	GO:0035254	glutamate receptor binding	24/2478	64/17092	4.59175e-06	0.000202802	ENSMUSG00000000881/ENSMUSG00000015837/ENSMUSG00000016933/ENSMUSG00000019843/ENSMUSG00000020723/ENSMUSG00000021057/ENSMUSG00000022623/ENSMUSG00000022790/ENSMUSG00000025813/ENSMUSG00000026072/ENSMUSG00000026959/ENSMUSG00000027254/ENSMUSG00000030098/ENSMUSG00000030302/ENSMUSG00000031214/ENSMUSG00000031837/ENSMUSG00000032216/ENSMUSG00000037541/ENSMUSG00000038738/ENSMUSG00000050321/ENSMUSG00000052572/…	Dlg3/Sqstm1/Plcg1/Fyn/Cacng4/Akap5/Shank3/Igsf11/Homer2/Il1r1/Grin1/Map1a/Grip2/Atp2b2/Ophn1/Necab2/Nedd4/Shank2/Shank1/Neto1/Dlg2/Shisa6/Flot1/Flot2	24
GO	BP	GO:0001818	negative regulation of cytokine production	58/2453	232/17047	1.23446e-05	0.000205837	ENSMUSG00000001123/ENSMUSG00000001847/ENSMUSG00000002602/ENSMUSG00000002983/ENSMUSG00000004266/ENSMUSG00000005413/ENSMUSG00000006445/ENSMUSG00000014361/ENSMUSG00000014773/ENSMUSG00000016496/ENSMUSG00000017830/ENSMUSG00000018909/ENSMUSG00000019943/ENSMUSG00000020101/ENSMUSG00000020227/ENSMUSG00000020399/ENSMUSG00000021709/ENSMUSG00000022475/ENSMUSG00000022488/ENSMUSG00000022508/ENSMUSG00000023915/…	Lgals9/Rac1/Axl/Relb/Ptpn6/Hmox1/Epha2/Mertk/Dll1/Cd274/Dhx58/Arrb1/Atp2b1/4632428N05Rik/Irak3/Havcr2/Erbb2ip/Hdac7/Nckap1l/Bcl6/Tnfrsf21/Trem2/Anxa1/Il33/Homer2/Fn1/Ptprc/Nmi/Nfkb1/Anxa4/Lag3/Tnfrsf1a/Tyrobp/Trim30a/Fgfr1/Cx3cl1/Traip/Cd59a/Ssc5d/Cd276/Inhbb/Cd84/Tlr4/Tgfb2/Thbs1/Tspo/Cmklr1/Zfp36/Bst2/Cd24a/Nr1h4/Cx3cr1/Bcl3/Cdh3/Sars/Syt11/C5ar2/Gbp4	58
GO	CC	GO:0042824	MHC class I peptide loading complex	2474-09-01	14/17165	2.66143e-05	0.000209157	ENSMUSG00000024308/ENSMUSG00000024339/ENSMUSG00000035929/ENSMUSG00000037321/ENSMUSG00000060550/ENSMUSG00000060802/ENSMUSG00000061232/ENSMUSG00000073409/ENSMUSG00000073411	Tapbp/Tap2/H2-Q4/Tap1/H2-Q7/B2m/H2-K1/H2-Q6/H2-D1	9
GO	CC	GO:0098685	Schaffer collateral - CA1 synapse	31/2474	102/17165	2.6965e-05	0.000209449	ENSMUSG00000004040/ENSMUSG00000004113/ENSMUSG00000006699/ENSMUSG00000009681/ENSMUSG00000015829/ENSMUSG00000016933/ENSMUSG00000017314/ENSMUSG00000017631/ENSMUSG00000019843/ENSMUSG00000024109/ENSMUSG00000024897/ENSMUSG00000026235/ENSMUSG00000027805/ENSMUSG00000028289/ENSMUSG00000028399/ENSMUSG00000030102/ENSMUSG00000031538/ENSMUSG00000031673/ENSMUSG00000032773/ENSMUSG00000034101/ENSMUSG00000038587/…	Stat3/Cacna1b/Cdc42/Bcr/Tnr/Plcg1/Mpp2/Abr/Fyn/Nrxn1/Apba1/Epha4/Pfn2/Epha7/Ptprd/Itpr1/Plat/Cdh11/Chrm1/Ctnnd1/Akap12/Dgki/Shank1/Picalm/Dgkz/Synpo/Tubb2b/Lrrc4/Lrrc4c/Syt11/Lrrtm2	31
GO	BP	GO:0007612	learning	43/2453	156/17047	1.28818e-05	0.000214192	ENSMUSG00000000326/ENSMUSG00000015829/ENSMUSG00000019970/ENSMUSG00000020654/ENSMUSG00000021478/ENSMUSG00000021877/ENSMUSG00000022208/ENSMUSG00000022619/ENSMUSG00000022623/ENSMUSG00000023017/ENSMUSG00000024109/ENSMUSG00000024912/ENSMUSG00000025318/ENSMUSG00000026959/ENSMUSG00000027254/ENSMUSG00000028546/ENSMUSG00000028664/ENSMUSG00000029563/ENSMUSG00000029838/ENSMUSG00000030310/ENSMUSG00000031302/…	Comt/Tnr/Sgk1/Adcy3/Drd1a/Arf4/Jph4/Mapk8ip2/Shank3/Asic1/Nrxn1/Fosl1/Jph3/Grin1/Map1a/Elavl4/Ephb2/Foxp2/Ptn/Slc6a1/Nlgn3/Ap1s2/Agt/Stra6/Nrxn2/Tanc1/Shank2/Slc24a2/Dgki/Shank1/Ppp1r9b/Cntnap2/Reln/Synpo/C1ql1/Ptgs1/Neto1/Cacna1c/Jun/Ntrk2/Grm7/Ddhd2/Ppp1r1b	43
GO	BP	GO:0022408	negative regulation of cell-cell adhesion	46/2453	171/17047	1.3089e-05	0.000217029	ENSMUSG00000000693/ENSMUSG00000001034/ENSMUSG00000001123/ENSMUSG00000002633/ENSMUSG00000004266/ENSMUSG00000009073/ENSMUSG00000015829/ENSMUSG00000016206/ENSMUSG00000016496/ENSMUSG00000018899/ENSMUSG00000020101/ENSMUSG00000020399/ENSMUSG00000020612/ENSMUSG00000021318/ENSMUSG00000021782/ENSMUSG00000021835/ENSMUSG00000022508/ENSMUSG00000022901/ENSMUSG00000023915/ENSMUSG00000023951/ENSMUSG00000024659/…	Loxl3/Mapk7/Lgals9/Shh/Ptpn6/Nf2/Tnr/H2-M3/Cd274/Irf1/4632428N05Rik/Havcr2/Prkar1a/Gli3/Dlg5/Bmp4/Bcl6/Cd86/Tnfrsf21/Vegfa/Anxa1/Serpine2/Pag1/Dtx1/Lag3/Cd9/Il4ra/Casp3/Ubash3b/Pawr/Cd276/H2-Aa/Fgl2/Mbp/Tnfrsf14/Epcam/C77370/Cd24a/Zfp608/Prkg1/Cebpb/Abat/Erbb2/H2-Ab1/Nrarp/Zfp703	46
GO	CC	GO:0045178	basal part of cell	22/2474	62/17165	2.84166e-05	0.000218188	ENSMUSG00000000392/ENSMUSG00000007655/ENSMUSG00000009376/ENSMUSG00000015533/ENSMUSG00000017774/ENSMUSG00000020122/ENSMUSG00000020758/ENSMUSG00000028631/ENSMUSG00000030737/ENSMUSG00000032554/ENSMUSG00000032988/ENSMUSG00000034462/ENSMUSG00000036353/ENSMUSG00000039115/ENSMUSG00000043850/ENSMUSG00000044217/ENSMUSG00000048537/ENSMUSG00000057182/ENSMUSG00000062312/ENSMUSG00000069601/ENSMUSG00000073639/…	Fap/Cav1/Met/Itga2/Myo1c/Egfr/Itgb4/Kcnq4/Slco2b1/Trf/Slc16a8/Pkd2/P2ry12/Itga9/Clrn1/Aqp5/Phldb1/Scn3a/Erbb2/Ank3/Rab18/C5ar2	22
GO	BP	GO:1902547	regulation of cellular response to vascular endothelial growth factor stimulus	2453-11-01	19/17047	1.32162e-05	0.000218191	ENSMUSG00000014773/ENSMUSG00000017774/ENSMUSG00000019647/ENSMUSG00000022883/ENSMUSG00000023886/ENSMUSG00000025351/ENSMUSG00000026883/ENSMUSG00000031486/ENSMUSG00000053477/ENSMUSG00000054793/ENSMUSG00000059895	Dll1/Myo1c/Sema6a/Robo1/Smoc2/Cd63/Dab2ip/Gpr124/Tcf4/Cadm4/Ptp4a3	11
GO	BP	GO:0007259	JAK-STAT cascade	37/2453	127/17047	1.32326e-05	0.000218191	ENSMUSG00000000409/ENSMUSG00000002147/ENSMUSG00000004040/ENSMUSG00000007655/ENSMUSG00000009073/ENSMUSG00000018899/ENSMUSG00000019843/ENSMUSG00000020027/ENSMUSG00000020919/ENSMUSG00000021756/ENSMUSG00000022906/ENSMUSG00000023206/ENSMUSG00000024087/ENSMUSG00000024621/ENSMUSG00000026104/ENSMUSG00000026395/ENSMUSG00000026923/ENSMUSG00000027718/ENSMUSG00000027947/ENSMUSG00000028399/ENSMUSG00000028519/…	Lck/Stat6/Stat3/Cav1/Nf2/Irf1/Fyn/Socs2/Stat5b/Il6st/Parp9/Il15ra/Cyp1b1/Csf1r/Stat1/Ptprc/Notch1/Il21/Il6ra/Ptprd/Dab1/Hdac1/Tnfrsf1a/Agt/Il10ra/Pkd1/Lif/Parp14/Pkd2/Neurod1/Clcf1/Inpp5f/Lyn/Isl1/Socs3/Bcl3/Cenpj	37
GO	BP	GO:0007435	salivary gland morphogenesis	16/2453	36/17047	1.33314e-05	0.000219211	ENSMUSG00000002633/ENSMUSG00000006699/ENSMUSG00000008575/ENSMUSG00000015647/ENSMUSG00000020019/ENSMUSG00000020122/ENSMUSG00000025810/ENSMUSG00000027168/ENSMUSG00000028780/ENSMUSG00000030084/ENSMUSG00000030123/ENSMUSG00000031565/ENSMUSG00000034101/ENSMUSG00000037820/ENSMUSG00000039239/ENSMUSG00000039952	Shh/Cdc42/Nfib/Lama5/Ntn4/Egfr/Nrp1/Pax6/Sema3c/Plxna1/Plxnd1/Fgfr1/Ctnnd1/Tgm2/Tgfb2/Dag1	16
GO	BP	GO:0014031	mesenchymal cell development	27/2453	81/17047	1.34362e-05	0.000220324	ENSMUSG00000000567/ENSMUSG00000000627/ENSMUSG00000001227/ENSMUSG00000001761/ENSMUSG00000002633/ENSMUSG00000015647/ENSMUSG00000018340/ENSMUSG00000019647/ENSMUSG00000019789/ENSMUSG00000021451/ENSMUSG00000021835/ENSMUSG00000024176/ENSMUSG00000025207/ENSMUSG00000025810/ENSMUSG00000025921/ENSMUSG00000025969/ENSMUSG00000026193/ENSMUSG00000026836/ENSMUSG00000026872/ENSMUSG00000026923/ENSMUSG00000027168/…	Sox9/Sema4f/Sema6b/Smo/Shh/Lama5/Anxa6/Sema6a/Hey2/Sema4d/Bmp4/Sox8/Sema4g/Nrp1/Rdh10/Nrp2/Fn1/Acvr1/Zeb2/Notch1/Pax6/Sema3c/Efnb1/Isl1/Cfl1/Mapk3/Sema3e	27
GO	CC	GO:0099092	postsynaptic density, intracellular component	13/2474	27/17165	3.08911e-05	0.000234492	ENSMUSG00000000881/ENSMUSG00000003279/ENSMUSG00000009681/ENSMUSG00000017631/ENSMUSG00000019843/ENSMUSG00000021057/ENSMUSG00000022623/ENSMUSG00000028059/ENSMUSG00000031292/ENSMUSG00000034101/ENSMUSG00000035168/ENSMUSG00000053580/ENSMUSG00000063063	Dlg3/Dlgap1/Bcr/Abr/Fyn/Akap5/Shank3/Arhgef2/Cdkl5/Ctnnd1/Tanc1/Tanc2/Ctnna2	13
GO	MF	GO:0017124	SH3 domain binding	37/2478	122/17092	5.70264e-06	0.000241792	ENSMUSG00000000416/ENSMUSG00000000915/ENSMUSG00000003378/ENSMUSG00000004266/ENSMUSG00000006519/ENSMUSG00000015950/ENSMUSG00000017167/ENSMUSG00000019823/ENSMUSG00000021057/ENSMUSG00000021065/ENSMUSG00000021262/ENSMUSG00000022623/ENSMUSG00000024725/ENSMUSG00000026883/ENSMUSG00000028041/ENSMUSG00000029603/ENSMUSG00000030403/ENSMUSG00000031165/ENSMUSG00000031355/ENSMUSG00000031813/ENSMUSG00000032369/…	Cttnbp2/Hip1r/Grik5/Ptpn6/Cyba/Ncf1/Cntnap1/Mical1/Akap5/Fut8/Evl/Shank3/Ostf1/Dab2ip/Adam15/Dtx1/Vasp/Was/Arhgap6/Mvb12a/Plscr1/Plscr2/Inppl1/Arhgap27/Dock4/Shank2/Shank1/Picalm/Elmo1/Lyn/Crb3/Prkce/Dock1/Qk/Gpx1/Wipf1/Wipf3	37
GO	CC	GO:0001725	stress fiber	26/2474	80/17165	3.27664e-05	0.000243199	ENSMUSG00000005057/ENSMUSG00000006219/ENSMUSG00000006519/ENSMUSG00000020388/ENSMUSG00000021998/ENSMUSG00000022443/ENSMUSG00000023348/ENSMUSG00000025278/ENSMUSG00000026556/ENSMUSG00000027940/ENSMUSG00000029581/ENSMUSG00000029860/ENSMUSG00000030739/ENSMUSG00000030847/ENSMUSG00000031605/ENSMUSG00000031636/ENSMUSG00000031799/ENSMUSG00000034201/ENSMUSG00000036718/ENSMUSG00000037712/ENSMUSG00000037736/…	Sh2b2/Fblim1/Cyba/Pdlim4/Lcp1/Myh9/Trip6/Flnb/Vangl2/Tpm3/Fscn1/Zyx/Myh14/Bag3/Klhl2/Pdlim3/Tpm4/Gas2l1/Micall2/Fermt2/Limch1/Amot/Synpo/Sept11/Palld/Sept9	26
GO	CC	GO:0097517	contractile actin filament bundle	26/2474	80/17165	3.27664e-05	0.000243199	ENSMUSG00000005057/ENSMUSG00000006219/ENSMUSG00000006519/ENSMUSG00000020388/ENSMUSG00000021998/ENSMUSG00000022443/ENSMUSG00000023348/ENSMUSG00000025278/ENSMUSG00000026556/ENSMUSG00000027940/ENSMUSG00000029581/ENSMUSG00000029860/ENSMUSG00000030739/ENSMUSG00000030847/ENSMUSG00000031605/ENSMUSG00000031636/ENSMUSG00000031799/ENSMUSG00000034201/ENSMUSG00000036718/ENSMUSG00000037712/ENSMUSG00000037736/…	Sh2b2/Fblim1/Cyba/Pdlim4/Lcp1/Myh9/Trip6/Flnb/Vangl2/Tpm3/Fscn1/Zyx/Myh14/Bag3/Klhl2/Pdlim3/Tpm4/Gas2l1/Micall2/Fermt2/Limch1/Amot/Synpo/Sept11/Palld/Sept9	26
GO	CC	GO:0005913	cell-cell adherens junction	31/2474	103/17165	3.3312e-05	0.000244532	ENSMUSG00000006411/ENSMUSG00000020388/ENSMUSG00000021782/ENSMUSG00000022443/ENSMUSG00000022656/ENSMUSG00000024304/ENSMUSG00000026312/ENSMUSG00000029860/ENSMUSG00000031636/ENSMUSG00000031673/ENSMUSG00000031841/ENSMUSG00000032012/ENSMUSG00000033278/ENSMUSG00000034101/ENSMUSG00000035776/ENSMUSG00000036510/ENSMUSG00000039952/ENSMUSG00000040511/ENSMUSG00000040972/ENSMUSG00000041598/ENSMUSG00000042228/…	Pvrl4/Pdlim4/Dlg5/Myh9/Pvrl3/Cdh2/Cdh7/Zyx/Pdlim3/Cdh11/Cdh13/Pvrl1/Ptprm/Ctnnd1/Cd99l2/Cdh8/Dag1/Pvr/Igsf21/Cdc42ep4/Lyn/Cdh20/Pard3b/Dsp/Sptan1/Cdh24/Flot1/Cdh3/Flot2/Pvrl2/Ctnna2	31
GO	BP	GO:0043900	regulation of multi-organism process	84/2453	374/17047	1.52518e-05	0.000249406	ENSMUSG00000000263/ENSMUSG00000000266/ENSMUSG00000000275/ENSMUSG00000000982/ENSMUSG00000001123/ENSMUSG00000001131/ENSMUSG00000001166/ENSMUSG00000002633/ENSMUSG00000002985/ENSMUSG00000006519/ENSMUSG00000007655/ENSMUSG00000009585/ENSMUSG00000015305/ENSMUSG00000015837/ENSMUSG00000017830/ENSMUSG00000019810/ENSMUSG00000020262/ENSMUSG00000020399/ENSMUSG00000020641/ENSMUSG00000021423/ENSMUSG00000021457/…	Glra1/Mid2/Trim25/Ccl3/Lgals9/Timp1/Oas1c/Shh/Apoe/Cyba/Cav1/Apobec3/Sash1/Sqstm1/Dhx58/Fuca2/Adarb1/Havcr2/Rsad2/Ly86/Syk/Cd180/Trim35/Parp9/Mx2/Tfeb/Eif2ak2/Cacna1h/Tmem173/Csf1r/Trim8/Ifitm1/Ifitm3/Ly96/Stat1/Stom/Notch1/Itgav/Adar/Npr2/Hdac1/Rest/Oasl2/Zc3hav1/Hpgds/Cd37/Trim30a/Trim21/Plat/Cx3cl1/Plscr1/Trib1/Myd88/Syde1/Isg15/Inhbb/Ddx60/Nod1/A230050P20Rik/Fgl2/Ddx58/Mill2/Trim62/Irf8/Pde3a…	84
GO	BP	GO:0043123	positive regulation of I-kappaB kinase/NF-kappaB signaling	36/2453	123/17047	1.53956e-05	0.000250318	ENSMUSG00000000266/ENSMUSG00000000275/ENSMUSG00000001020/ENSMUSG00000019843/ENSMUSG00000020941/ENSMUSG00000022178/ENSMUSG00000022500/ENSMUSG00000024927/ENSMUSG00000025034/ENSMUSG00000025888/ENSMUSG00000026029/ENSMUSG00000026031/ENSMUSG00000026637/ENSMUSG00000029826/ENSMUSG00000030339/ENSMUSG00000030341/ENSMUSG00000031328/ENSMUSG00000031392/ENSMUSG00000031639/ENSMUSG00000031778/ENSMUSG00000031887/…	Mid2/Trim25/S100a4/Fyn/Map3k14/Ajuba/Litaf/Rela/Trim8/Casp1/Casp8/Cflar/Traf5/Zc3hav1/Ltbr/Tnfrsf1a/Flna/Irak1/Tlr3/Cx3cl1/Tradd/Tirap/Myd88/Eda2r/Tgm2/Nod1/Tlr4/Trim62/Prkce/Tifa/Rnf31/Trim32/Cx3cr1/Prkcb/Tnip2/Irak4	36
GO	BP	GO:0043122	regulation of I-kappaB kinase/NF-kappaB signaling	46/2453	172/17047	1.54114e-05	0.000250318	ENSMUSG00000000266/ENSMUSG00000000275/ENSMUSG00000001020/ENSMUSG00000008305/ENSMUSG00000015837/ENSMUSG00000019843/ENSMUSG00000020941/ENSMUSG00000022026/ENSMUSG00000022178/ENSMUSG00000022500/ENSMUSG00000024927/ENSMUSG00000025034/ENSMUSG00000025888/ENSMUSG00000026029/ENSMUSG00000026031/ENSMUSG00000026104/ENSMUSG00000026637/ENSMUSG00000026883/ENSMUSG00000028800/ENSMUSG00000029204/ENSMUSG00000029826/…	Mid2/Trim25/S100a4/Tle1/Sqstm1/Fyn/Map3k14/Olfm4/Ajuba/Litaf/Rela/Trim8/Casp1/Casp8/Cflar/Stat1/Traf5/Dab2ip/Hdac1/Rhoh/Zc3hav1/Ltbr/Tnfrsf1a/Flna/Irak1/Tlr3/Cx3cl1/Tradd/Tirap/Myd88/Otud7a/Eda2r/Tgm2/Nod1/Tlr4/Trim62/Prkce/Tifa/Rnf31/Nr1h4/Trim32/Cx3cr1/Prkcb/Tnip2/Irak4/Capn3	46
GO	BP	GO:0002429	immune response-activating cell surface receptor signaling pathway	45/2453	167/17047	1.5434e-05	0.000250318	ENSMUSG00000000409/ENSMUSG00000000732/ENSMUSG00000002699/ENSMUSG00000003352/ENSMUSG00000004266/ENSMUSG00000005057/ENSMUSG00000016933/ENSMUSG00000017412/ENSMUSG00000019843/ENSMUSG00000020437/ENSMUSG00000021457/ENSMUSG00000022148/ENSMUSG00000022488/ENSMUSG00000023915/ENSMUSG00000024927/ENSMUSG00000025314/ENSMUSG00000026395/ENSMUSG00000026433/ENSMUSG00000027544/ENSMUSG00000028525/ENSMUSG00000029084/…	Lck/Icosl/Lcp2/Cacnb3/Ptpn6/Sh2b2/Plcg1/Cacnb4/Fyn/Myo1g/Syk/Fyb/Nckap1l/Tnfrsf21/Rela/Ptprj/Ptprc/Rab29/Nfatc2/Pde4b/Cd38/Cd22/Cmtm3/Plscr1/Vav3/Plcg2/Nfkbiz/Pawr/Cd276/Cd81/Themis2/Plcl2/Plekha1/C3ar1/Mill2/Cmklr1/Lyn/Klhl6/Rnf31/C5ar1/Prkcb/Cd47/Fcer1g/Pvrl2/C5ar2	45
GO	MF	GO:0050840	extracellular matrix binding	21/2478	53/17092	6.53885e-06	0.000259451	ENSMUSG00000001507/ENSMUSG00000002633/ENSMUSG00000015533/ENSMUSG00000020019/ENSMUSG00000021702/ENSMUSG00000022894/ENSMUSG00000023328/ENSMUSG00000027087/ENSMUSG00000028195/ENSMUSG00000031558/ENSMUSG00000034220/ENSMUSG00000034664/ENSMUSG00000035279/ENSMUSG00000038642/ENSMUSG00000039115/ENSMUSG00000039116/ENSMUSG00000039952/ENSMUSG00000040152/ENSMUSG00000041936/ENSMUSG00000050335/ENSMUSG00000068220	Itga3/Shh/Itga2/Ntn4/Thbs4/Adamts5/Ache/Itgav/Cyr61/Slit2/Gpc1/Itga2b/Ssc5d/Ctss/Itga9/Gpr126/Dag1/Thbs1/Agrn/Lgals3/Lgals1	21
GO	MF	GO:0098919	structural constituent of postsynaptic density	2478-08-01	10/17092	6.60866e-06	0.000259451	ENSMUSG00000000881/ENSMUSG00000003279/ENSMUSG00000017314/ENSMUSG00000022623/ENSMUSG00000037541/ENSMUSG00000038738/ENSMUSG00000040003/ENSMUSG00000052572	Dlg3/Dlgap1/Mpp2/Shank3/Shank2/Shank1/Magi2/Dlg2	8
GO	BP	GO:0051051	negative regulation of transport	106/2453	499/17047	1.68913e-05	0.000273207	ENSMUSG00000000326/ENSMUSG00000001123/ENSMUSG00000002633/ENSMUSG00000002985/ENSMUSG00000003161/ENSMUSG00000003352/ENSMUSG00000004056/ENSMUSG00000004347/ENSMUSG00000005057/ENSMUSG00000005413/ENSMUSG00000007655/ENSMUSG00000009681/ENSMUSG00000013698/ENSMUSG00000014077/ENSMUSG00000017631/ENSMUSG00000020282/ENSMUSG00000020641/ENSMUSG00000020733/ENSMUSG00000021057/ENSMUSG00000021071/ENSMUSG00000021194/…	Comt/Lgals9/Shh/Apoe/Sri/Cacnb3/Akt2/Pde1c/Sh2b2/Hmox1/Cav1/Bcr/Pea15a/Chp1/Abr/Rhbdf1/Rsad2/Slc9a3r1/Akap5/Trim9/Chga/Asic1/Npff/Tnfrsf21/Rhoq/Syt4/Anxa1/Il33/Tmem14a/Map4k4/Fn1/Sp100/Serpine2/Frmd4a/Notch1/Itgav/Pkia/Anxa5/Kcnab1/Gem/Tmem55a/Sdcbp/Tnfrsf1b/Edn2/Ephb2/Hdac1/Lrpap1/Rest/Fam115c/Anxa4/Tnfrsf1a/Cyfip1/Bag3/Gpm6b/Irak1/Gnao1/Cx3cl1/Necab2/Nedd4/Gnai2/Snx33/Inha/Tbc1d4/Lif/Pkd2/Pkig/…	106
GO	BP	GO:0002708	positive regulation of lymphocyte mediated immunity	34/2453	114/17047	1.69471e-05	0.000273365	ENSMUSG00000002147/ENSMUSG00000015947/ENSMUSG00000016206/ENSMUSG00000019998/ENSMUSG00000020641/ENSMUSG00000020919/ENSMUSG00000022378/ENSMUSG00000024164/ENSMUSG00000024339/ENSMUSG00000026072/ENSMUSG00000026395/ENSMUSG00000027347/ENSMUSG00000027718/ENSMUSG00000029468/ENSMUSG00000030124/ENSMUSG00000031101/ENSMUSG00000034116/ENSMUSG00000035929/ENSMUSG00000037447/ENSMUSG00000037706/ENSMUSG00000040511/…	Stat6/Fcgr1/H2-M3/Stx7/Rsad2/Stat5b/Fam49b/C3/Tap2/Il1r1/Ptprc/Rasgrp1/Il21/P2rx7/Lag3/Sash3/Vav1/H2-Q4/Arid5a/Cd81/Pvr/Clcf1/Mill2/Cd24a/H2-T22/Fcer1g/H2-Q7/B2m/H2-K1/Pvrl2/H2-T23/H2-Q6/H2-D1/H60b	34
GO	BP	GO:0042102	positive regulation of T cell proliferation	29/2453	91/17047	1.74153e-05	0.000280155	ENSMUSG00000000732/ENSMUSG00000002633/ENSMUSG00000016493/ENSMUSG00000016496/ENSMUSG00000020399/ENSMUSG00000020919/ENSMUSG00000021457/ENSMUSG00000021756/ENSMUSG00000022488/ENSMUSG00000022901/ENSMUSG00000024397/ENSMUSG00000024659/ENSMUSG00000026395/ENSMUSG00000027718/ENSMUSG00000027947/ENSMUSG00000027962/ENSMUSG00000031101/ENSMUSG00000031217/ENSMUSG00000032440/ENSMUSG00000032475/ENSMUSG00000035678/…	Icosl/Shh/Cd46/Cd274/Havcr2/Stat5b/Syk/Il6st/Nckap1l/Cd86/Aif1/Anxa1/Ptprc/Il21/Il6ra/Vcam1/Sash3/Efnb1/Tgfbr2/Nck1/Tnfsf9/Cd276/Cd81/Cd24a/Ccdc88b/Igf2/Rasal3/H2-T23/Cd59b	29
GO	BP	GO:0090596	sensory organ morphogenesis	63/2453	261/17047	1.75411e-05	0.000281416	ENSMUSG00000000567/ENSMUSG00000001288/ENSMUSG00000001847/ENSMUSG00000002633/ENSMUSG00000002731/ENSMUSG00000004040/ENSMUSG00000006445/ENSMUSG00000007989/ENSMUSG00000009681/ENSMUSG00000014773/ENSMUSG00000017491/ENSMUSG00000017631/ENSMUSG00000020105/ENSMUSG00000020467/ENSMUSG00000020733/ENSMUSG00000021239/ENSMUSG00000021318/ENSMUSG00000021464/ENSMUSG00000021557/ENSMUSG00000021835/ENSMUSG00000022483/…	Sox9/Rarg/Rac1/Shh/Prkra/Stat3/Epha2/Fzd3/Bcr/Dll1/Rarb/Abr/Lrig3/Efemp1/Slc9a3r1/Vsx2/Gli3/Ror2/Agtpbp1/Bmp4/Col2a1/Pvrl3/Arl6/Vegfa/Man2a1/Sox8/Lrp5/Pde6c/Gdf11/Vangl2/Col5a1/Frzb/Pax6/Col11a1/Rpe65/Kcnq4/Ephb2/Hdac1/Ptn/Lrig1/Atp2b2/Trpm1/Fgfr1/Pvrl1/Stra6/Triobp/Ptprm/Fgf2/Sobp/Six3/Sdk1/Sdk2/Clrn1/Aqp5/Bhlhe23/Tifab/Gas1/Ntrk2/Col8a2/Mapk3/Col8a1/Fat1/Fjx1	63
GO	BP	GO:0002483	antigen processing and presentation of endogenous peptide antigen	13/2453	26/17047	1.81184e-05	0.00028834	ENSMUSG00000016206/ENSMUSG00000021583/ENSMUSG00000024308/ENSMUSG00000024339/ENSMUSG00000035929/ENSMUSG00000037321/ENSMUSG00000056116/ENSMUSG00000060550/ENSMUSG00000060802/ENSMUSG00000061232/ENSMUSG00000067212/ENSMUSG00000073409/ENSMUSG00000073411	H2-M3/Erap1/Tapbp/Tap2/H2-Q4/Tap1/H2-T22/H2-Q7/B2m/H2-K1/H2-T23/H2-Q6/H2-D1	13
GO	BP	GO:0006929	substrate-dependent cell migration	13/2453	26/17047	1.81184e-05	0.00028834	ENSMUSG00000015533/ENSMUSG00000022883/ENSMUSG00000023905/ENSMUSG00000025810/ENSMUSG00000025969/ENSMUSG00000026193/ENSMUSG00000026395/ENSMUSG00000031078/ENSMUSG00000031558/ENSMUSG00000031565/ENSMUSG00000032475/ENSMUSG00000036353/ENSMUSG00000055805	Itga2/Robo1/Tnfrsf12a/Nrp1/Nrp2/Fn1/Ptprc/Cttn/Slit2/Fgfr1/Nck1/P2ry12/Fmnl1	13
GO	BP	GO:0019885	antigen processing and presentation of endogenous peptide antigen via MHC class I	13/2453	26/17047	1.81184e-05	0.00028834	ENSMUSG00000016206/ENSMUSG00000021583/ENSMUSG00000024308/ENSMUSG00000024339/ENSMUSG00000035929/ENSMUSG00000037321/ENSMUSG00000056116/ENSMUSG00000060550/ENSMUSG00000060802/ENSMUSG00000061232/ENSMUSG00000067212/ENSMUSG00000073409/ENSMUSG00000073411	H2-M3/Erap1/Tapbp/Tap2/H2-Q4/Tap1/H2-T22/H2-Q7/B2m/H2-K1/H2-T23/H2-Q6/H2-D1	13
GO	BP	GO:0038061	NIK/NF-kappaB signaling	32/2453	105/17047	1.82989e-05	0.000290434	ENSMUSG00000002983/ENSMUSG00000015305/ENSMUSG00000020122/ENSMUSG00000020271/ENSMUSG00000020399/ENSMUSG00000020941/ENSMUSG00000022475/ENSMUSG00000022500/ENSMUSG00000023348/ENSMUSG00000023992/ENSMUSG00000024079/ENSMUSG00000024927/ENSMUSG00000025225/ENSMUSG00000027339/ENSMUSG00000027995/ENSMUSG00000028691/ENSMUSG00000031392/ENSMUSG00000031639/ENSMUSG00000031887/ENSMUSG00000032041/ENSMUSG00000033170/…	Relb/Sash1/Egfr/Fbxw11/Havcr2/Map3k14/Hdac7/Litaf/Trip6/Trem2/Eif2ak2/Rela/Nfkb2/Rassf2/Tlr2/Prdx1/Irak1/Tlr3/Tradd/Tirap/Card10/Uaca/Rtkn2/Nod1/Tlr4/Tlr7/Cd14/Bcl3/Ptp4a3/Chil1/Hmgb1/Tspan6	32
GO	CC	GO:0044306	neuron projection terminus	47/2474	183/17165	4.02533e-05	0.000292274	ENSMUSG00000000263/ENSMUSG00000001985/ENSMUSG00000001986/ENSMUSG00000003161/ENSMUSG00000003378/ENSMUSG00000004113/ENSMUSG00000004319/ENSMUSG00000006930/ENSMUSG00000015533/ENSMUSG00000019823/ENSMUSG00000021478/ENSMUSG00000023052/ENSMUSG00000024261/ENSMUSG00000024743/ENSMUSG00000025892/ENSMUSG00000026235/ENSMUSG00000026904/ENSMUSG00000026959/ENSMUSG00000027712/ENSMUSG00000029470/ENSMUSG00000030447/…	Glra1/Grik3/Gria3/Sri/Grik5/Cacna1b/Clcn3/Hap1/Itga2/Mical1/Drd1a/Npff/Syt4/Syt7/Gria4/Epha4/Slc4a10/Grin1/Anxa5/P2rx4/Cyfip1/Calca/Rgs10/Ophn1/Chrm1/Gabrb3/Sncb/Atcay/Tanc1/Kcnc2/Syt1/Cdh8/Dgki/Cplx3/Blvrb/Adora1/Chrm3/Kcna1/Sept6/Flrt3/Prkcb/Ntrk2/Grik2/Ptprn2/Grm7/Kcnc1/Syt11	47
GO	BP	GO:0050671	positive regulation of lymphocyte proliferation	36/2453	124/17047	1.87263e-05	0.000296425	ENSMUSG00000000732/ENSMUSG00000002633/ENSMUSG00000016493/ENSMUSG00000016496/ENSMUSG00000020399/ENSMUSG00000020919/ENSMUSG00000021457/ENSMUSG00000021756/ENSMUSG00000022488/ENSMUSG00000022508/ENSMUSG00000022901/ENSMUSG00000024397/ENSMUSG00000024659/ENSMUSG00000026395/ENSMUSG00000027544/ENSMUSG00000027718/ENSMUSG00000027947/ENSMUSG00000027962/ENSMUSG00000029084/ENSMUSG00000031101/ENSMUSG00000031217/…	Icosl/Shh/Cd46/Cd274/Havcr2/Stat5b/Syk/Il6st/Nckap1l/Bcl6/Cd86/Aif1/Anxa1/Ptprc/Nfatc2/Il21/Il6ra/Vcam1/Cd38/Sash3/Efnb1/Tgfbr2/Nck1/Myd88/Vav3/Tnfsf9/Cd276/Cd81/Tlr4/Clcf1/Cd24a/Ccdc88b/Igf2/Rasal3/H2-T23/Cd59b	36
GO	MF	GO:0046873	metal ion transmembrane transporter activity	93/2478	415/17092	8.19182e-06	0.00030307	ENSMUSG00000001985/ENSMUSG00000003352/ENSMUSG00000003378/ENSMUSG00000004113/ENSMUSG00000005360/ENSMUSG00000009292/ENSMUSG00000010066/ENSMUSG00000013275/ENSMUSG00000015968/ENSMUSG00000016346/ENSMUSG00000017412/ENSMUSG00000017756/ENSMUSG00000017765/ENSMUSG00000018340/ENSMUSG00000019558/ENSMUSG00000019943/ENSMUSG00000020704/ENSMUSG00000020723/ENSMUSG00000020866/ENSMUSG00000021313/ENSMUSG00000022208/…	Grik3/Cacnb3/Grik5/Cacna1b/Slc1a3/Trpm2/Cacna2d2/Slc41a1/Cacna1d/Kcnq2/Cacnb4/Slc12a7/Slc12a4/Anxa6/Slc6a8/Atp2b1/Asic2/Cacng4/Cacna1g/Ryr2/Jph4/Asic1/Scn8a/Cacna1h/Slc12a2/Slc1a1/Jph3/Atp2b4/Slc4a10/Grin1/Lrrc26/Itgav/Anxa5/Kcnab1/Slc6a9/Kcnq4/Slc9a1/P2rx4/Itpr1/Slc6a12/Erc1/Atp2b2/Slc6a11/Slc6a1/Trpm1/Slc9a9/Rasa3/Gpm6a/Trf/Slc8b1/Pkd1/Atp1a1/Kcnk1/Slc25a37/Kcnh5/Pkd2/Cacna1a/Scn7a/Kcnc2/Slc6a2…	93
GO	MF	GO:0019838	growth factor binding	40/2478	138/17092	8.29152e-06	0.00030307	ENSMUSG00000001119/ENSMUSG00000005320/ENSMUSG00000006930/ENSMUSG00000019997/ENSMUSG00000020122/ENSMUSG00000020758/ENSMUSG00000021756/ENSMUSG00000022146/ENSMUSG00000022483/ENSMUSG00000023951/ENSMUSG00000024940/ENSMUSG00000025213/ENSMUSG00000025810/ENSMUSG00000026072/ENSMUSG00000026836/ENSMUSG00000026837/ENSMUSG00000027087/ENSMUSG00000027947/ENSMUSG00000028072/ENSMUSG00000028195/ENSMUSG00000028249/…	Col6a1/Fgfr4/Hap1/Ctgf/Egfr/Itgb4/Il6st/Osmr/Col2a1/Vegfa/Ltbp3/Kazald1/Nrp1/Il1r1/Acvr1/Col5a1/Itgav/Il6ra/Ntrk1/Cyr61/Sdcbp/Csf3r/Tgfbr3/Flt1/Ptn/A2m/Col4a1/Fgfr1/Il10ra/Tgfbr2/Gpc1/Thbs1/Agrn/Wfikkn2/Bmpr1b/Ntrk2/Acvr2b/Erbb2/Kdr/Il3ra	40
GO	BP	GO:1901215	negative regulation of neuron death	57/2453	230/17047	1.92224e-05	0.000303469	ENSMUSG00000000753/ENSMUSG00000001761/ENSMUSG00000002602/ENSMUSG00000002633/ENSMUSG00000002985/ENSMUSG00000004040/ENSMUSG00000004891/ENSMUSG00000005413/ENSMUSG00000005656/ENSMUSG00000007653/ENSMUSG00000014599/ENSMUSG00000018909/ENSMUSG00000019843/ENSMUSG00000021194/ENSMUSG00000022475/ENSMUSG00000023011/ENSMUSG00000023088/ENSMUSG00000023951/ENSMUSG00000025810/ENSMUSG00000026826/ENSMUSG00000026959/…	Serpinf1/Smo/Axl/Shh/Apoe/Stat3/Nes/Hmox1/Snx6/Gabrb2/Csf1/Arrb1/Fyn/Chga/Hdac7/Faim2/Abcc1/Vegfa/Nrp1/Nr4a2/Grin1/Ntrk1/Gclm/Tnfrsf1b/Hdac1/Rest/Chl1/Itpr1/Mt3/Mt1/Cx3cl1/Aars/Gabrb3/Cacna1a/Grn/Sncb/Ccl12/Nos1ap/En2/Wfs1/Lrp1/Clcf1/Kif14/Isl1/Amigo2/Ndnf/C5ar1/Sorl1/Cited1/Cx3cr1/Jun/Ntrk2/Grik2/Cebpb/Grm7/Nrbp2/Pcp4	57
GO	BP	GO:0002921	negative regulation of humoral immune response	2453-08-01	11/17047	1.99615e-05	0.00031347	ENSMUSG00000004266/ENSMUSG00000016481/ENSMUSG00000016493/ENSMUSG00000023224/ENSMUSG00000030111/ENSMUSG00000032679/ENSMUSG00000038576/ENSMUSG00000068686	Ptpn6/Cr1l/Cd46/Serping1/A2m/Cd59a/Susd4/Cd59b	8
GO	BP	GO:0060600	dichotomous subdivision of an epithelial terminal unit	2453-08-01	11/17047	1.99615e-05	0.00031347	ENSMUSG00000025810/ENSMUSG00000026556/ENSMUSG00000028640/ENSMUSG00000028780/ENSMUSG00000029378/ENSMUSG00000030084/ENSMUSG00000030123/ENSMUSG00000032359	Nrp1/Vangl2/Tfap2c/Sema3c/Areg/Plxna1/Plxnd1/Ctsh	8
GO	BP	GO:0019722	calcium-mediated signaling	50/2453	194/17047	2.00792e-05	0.000314485	ENSMUSG00000000982/ENSMUSG00000001034/ENSMUSG00000003161/ENSMUSG00000006930/ENSMUSG00000009292/ENSMUSG00000013033/ENSMUSG00000014077/ENSMUSG00000015968/ENSMUSG00000016933/ENSMUSG00000021057/ENSMUSG00000021313/ENSMUSG00000021457/ENSMUSG00000021478/ENSMUSG00000023992/ENSMUSG00000025318/ENSMUSG00000025333/ENSMUSG00000025813/ENSMUSG00000026395/ENSMUSG00000026463/ENSMUSG00000026751/ENSMUSG00000026959/…	Ccl3/Mapk7/Sri/Hap1/Trpm2/Lphn1/Chp1/Cacna1d/Plcg1/Akap5/Ryr2/Syk/Drd1a/Trem2/Jph3/Gpr143/Homer2/Ptprc/Atp2b4/Nr5a1/Grin1/Nfatc2/Vcam1/Ptgfr/Asph/Edn2/Hpca/Slc9a1/P2rx4/Exoc4/Itpr1/Cdh13/Nfatc1/Pkd2/Kiss1r/P2ry12/Ppp1r9b/Rcan2/Cmklr1/Cd24a/Samd14/P2ry6/Sepn1/Cacna1c/Cx3cr1/Slc8a1/Rit2/Kdr/Irgm2/Ccr5	50
GO	BP	GO:0021543	pallium development	48/2453	184/17047	2.07566e-05	0.00032424	ENSMUSG00000000247/ENSMUSG00000001761/ENSMUSG00000001847/ENSMUSG00000009073/ENSMUSG00000019803/ENSMUSG00000020122/ENSMUSG00000021318/ENSMUSG00000021478/ENSMUSG00000022462/ENSMUSG00000022883/ENSMUSG00000024304/ENSMUSG00000025810/ENSMUSG00000025969/ENSMUSG00000026192/ENSMUSG00000026463/ENSMUSG00000026872/ENSMUSG00000026883/ENSMUSG00000026959/ENSMUSG00000027168/ENSMUSG00000028078/ENSMUSG00000028519/…	Lhx2/Smo/Rac1/Nf2/Nr2e1/Egfr/Gli3/Drd1a/Slc38a2/Robo1/Cdh2/Nrp1/Nrp2/Atic/Atp2b4/Zeb2/Dab2ip/Grin1/Pax6/Dclk2/Dab1/Lrp8/Tfap2c/Hdac1/Epha5/Foxp2/Flna/Plxna3/Slit2/Fgfr1/Casp3/Kirrel3/Fez1/Neurod1/P2ry12/Gng12/Ppp1r9b/Cntnap2/Lrp1/Kif14/Reln/Ccdc141/2900011O08Rik/Kcna1/Ntrk2/Alk/Tacc1/Ccdc85c	48
GO	MF	GO:0005262	calcium channel activity	35/2478	115/17092	9.26184e-06	0.000327252	ENSMUSG00000003352/ENSMUSG00000004113/ENSMUSG00000009292/ENSMUSG00000010066/ENSMUSG00000015968/ENSMUSG00000017412/ENSMUSG00000018340/ENSMUSG00000020723/ENSMUSG00000020866/ENSMUSG00000021313/ENSMUSG00000022208/ENSMUSG00000024112/ENSMUSG00000025318/ENSMUSG00000026959/ENSMUSG00000027087/ENSMUSG00000029470/ENSMUSG00000030102/ENSMUSG00000030172/ENSMUSG00000030523/ENSMUSG00000031453/ENSMUSG00000031517/…	Cacnb3/Cacna1b/Trpm2/Cacna2d2/Cacna1d/Cacnb4/Anxa6/Cacng4/Cacna1g/Ryr2/Jph4/Cacna1h/Jph3/Grin1/Itgav/P2rx4/Itpr1/Erc1/Trpm1/Rasa3/Gpm6a/Pkd1/Pkd2/Cacna1a/Slc24a2/Cacng5/Jph1/Marcksl1/Orai1/Cacna1c/Tmco1/Grm7/Slc24a3/Tmem28/Fam155a	35
GO	BP	GO:0002228	natural killer cell mediated immunity	21/2453	57/17047	2.17895e-05	0.000338014	ENSMUSG00000001123/ENSMUSG00000004266/ENSMUSG00000016206/ENSMUSG00000020399/ENSMUSG00000020919/ENSMUSG00000024339/ENSMUSG00000027347/ENSMUSG00000027718/ENSMUSG00000028691/ENSMUSG00000028793/ENSMUSG00000030124/ENSMUSG00000030157/ENSMUSG00000032202/ENSMUSG00000034116/ENSMUSG00000037321/ENSMUSG00000040511/ENSMUSG00000040987/ENSMUSG00000048583/ENSMUSG00000062300/ENSMUSG00000067212/ENSMUSG00000075297	Lgals9/Ptpn6/H2-M3/Havcr2/Stat5b/Tap2/Rasgrp1/Il21/Prdx1/Rnf19b/Lag3/Clec2d/Rab27a/Vav1/Tap1/Pvr/Mill2/Igf2/Pvrl2/H2-T23/H60b	21
GO	BP	GO:0006949	syncytium formation	21/2453	57/17047	2.17895e-05	0.000338014	ENSMUSG00000015745/ENSMUSG00000022443/ENSMUSG00000023992/ENSMUSG00000025888/ENSMUSG00000026031/ENSMUSG00000026509/ENSMUSG00000027544/ENSMUSG00000030272/ENSMUSG00000030342/ENSMUSG00000030579/ENSMUSG00000030748/ENSMUSG00000034730/ENSMUSG00000034855/ENSMUSG00000035168/ENSMUSG00000035673/ENSMUSG00000037706/ENSMUSG00000040747/ENSMUSG00000048612/ENSMUSG00000053617/ENSMUSG00000059714/ENSMUSG00000074364	Plekho1/Myh9/Trem2/Casp1/Cflar/Capn2/Nfatc2/Camk1/Cd9/Tyrobp/Il4ra/Bai1/Cxcl10/Tanc1/Sbno2/Cd81/Cd53/Myof/Sh3pxd2a/Flot1/Ehd2	21
GO	BP	GO:0034332	adherens junction organization	35/2453	120/17047	2.18092e-05	0.000338014	ENSMUSG00000000957/ENSMUSG00000001847/ENSMUSG00000006699/ENSMUSG00000009681/ENSMUSG00000015533/ENSMUSG00000021782/ENSMUSG00000022178/ENSMUSG00000022425/ENSMUSG00000023951/ENSMUSG00000024304/ENSMUSG00000025314/ENSMUSG00000025810/ENSMUSG00000026312/ENSMUSG00000027087/ENSMUSG00000027646/ENSMUSG00000031078/ENSMUSG00000031342/ENSMUSG00000031355/ENSMUSG00000031673/ENSMUSG00000031841/ENSMUSG00000032402/…	Mmp14/Rac1/Cdc42/Bcr/Itga2/Dlg5/Ajuba/Enpp2/Vegfa/Cdh2/Ptprj/Nrp1/Cdh7/Itgav/Src/Cttn/Gpm6b/Arhgap6/Cdh11/Cdh13/Smad3/Cdh8/Rab8b/Fermt2/Limch1/Lrp1/S100a10/Cdh20/Dsp/Cfl1/Cdh24/Cdh3/Kdr/Numbl/Zfp703	35
GO	BP	GO:0048714	positive regulation of oligodendrocyte differentiation	2453-12-01	23/17047	2.20345e-05	0.000340133	ENSMUSG00000002633/ENSMUSG00000022425/ENSMUSG00000027995/ENSMUSG00000028599/ENSMUSG00000028800/ENSMUSG00000029838/ENSMUSG00000031750/ENSMUSG00000037855/ENSMUSG00000039952/ENSMUSG00000044519/ENSMUSG00000048078/ENSMUSG00000062078	Shh/Enpp2/Tlr2/Tnfrsf1b/Hdac1/Ptn/Il34/Zfp365/Dag1/Zfp488/Tenm4/Qk	12
[truncated: 1,212 more rows]
