# Supplementary material for: Homeostatic plasticity in the retina is associated with maintenance of night vision during retinal degenerative disease
Source: eLife. 2020 Sep 22;9:e59422. doi: 10.7554/eLife.59422 (PMC7529457; doi:10.7554/eLife.59422)
Supplement: Supplementary file 8. [file elife-59422-supp8.xls]

## Sheet: HetvsWT_up_KEGGenrich_significa
Enrich_Category	KEGGID	Description	GeneRatio	BgRatio	pvalue	padj	geneID	geneName	keggID	Count
KEGG	mmu04514	Cell adhesion molecules (CAMs)	56/1155	144/6959	8.53694e-11	2.6123e-08	ENSMUSG00000000290/ENSMUSG00000000732/ENSMUSG00000005338/ENSMUSG00000016206/ENSMUSG00000016496/ENSMUSG00000017167/ENSMUSG00000020101/ENSMUSG00000020598/ENSMUSG00000022491/ENSMUSG00000022656/ENSMUSG00000022790/ENSMUSG00000022901/ENSMUSG00000024109/ENSMUSG00000024304/ENSMUSG00000025321/ENSMUSG00000026395/ENSMUSG00000026566/ENSMUSG00000027009/ENSMUSG00000027087/ENSMUSG00000027322/ENSMUSG00000027962/…	Itgb2/Icosl/Cadm3/H2-M3/Cd274/Cntnap1/4632428N05Rik/Nrcam/Glycam1/Pvrl3/Igsf11/Cd86/Nrxn1/Cdh2/Itgb8/Ptprc/Mpzl1/Itga4/Itgav/Siglec1/Vcam1/Cd22/Itgam/Nlgn3/L1cam/Jam3/Pvrl1/Neo1/Ptprm/Ptprf/Nrxn2/Cd276/H2-Q4/H2-Aa/Icam1/F11r/Itga9/Cntnap2/Pvr/Lrrc4b/Selplg/Lrrc4/Lrrc4c/Cntn1/H2-T22/H2-Q7/H2-Eb1/Cdh3/H2-K1/Pvrl2/Nlgn1/Nrxn3/H2-T23/H2-Q6/H2-D1/H2-Ab1	mmu:16414/mmu:50723/mmu:94332/mmu:14991/mmu:60533/mmu:53321/mmu:74048/mmu:319504/mmu:14663/mmu:58998/mmu:207683/mmu:12524/mmu:18189/mmu:12558/mmu:320910/mmu:19264/mmu:68481/mmu:16401/mmu:16410/mmu:20612/mmu:22329/mmu:12483/mmu:16409/mmu:245537/mmu:16728/mmu:83964/mmu:58235/mmu:18007/mmu:19274/mmu:19268/mmu:18190/mmu:102657/mmu:15015/mmu:14960/mmu:15894/mmu:16456/mmu:104099/mmu:66797/mmu:52118/mmu…	56
KEGG	mmu04010	MAPK signaling pathway	90/1155	288/6959	2.5473e-10	3.89737e-08	ENSMUSG00000000120/ENSMUSG00000001034/ENSMUSG00000001847/ENSMUSG00000002983/ENSMUSG00000003352/ENSMUSG00000003644/ENSMUSG00000004056/ENSMUSG00000004113/ENSMUSG00000004791/ENSMUSG00000005320/ENSMUSG00000006445/ENSMUSG00000006699/ENSMUSG00000009376/ENSMUSG00000010066/ENSMUSG00000014599/ENSMUSG00000015312/ENSMUSG00000015968/ENSMUSG00000016528/ENSMUSG00000017412/ENSMUSG00000018909/ENSMUSG00000019960/…	Ngfr/Mapk7/Rac1/Relb/Cacnb3/Rps6ka1/Akt2/Cacna1b/Pgf/Fgfr4/Epha2/Cdc42/Met/Cacna2d2/Csf1/Gadd45b/Cacna1d/Mapkapk2/Cacnb4/Arrb1/Dusp6/Egfr/Mknk2/Cacng4/Cacna1g/Map3k14/Gadd45g/Map3k1/Mapk8ip2/Vegfa/Cacna1h/Map3k8/Csf1r/Fas/Rela/Rps6ka4/Nfkb2/Flnb/Il1r1/Map4k4/Mapk8ip1/Cdc25b/Rasgrp1/Efna1/Ntrk1/Nfkb1/Mknk1/Stmn1/Map3k6/Areg/Flt1/Tgfa/Dusp16/Tnfrsf1a/Flna/Irak1/Fgfr1/Casp3/Tradd/Rasa2/Tgfbr2/Mras/M…	mmu:18053/mmu:23939/mmu:19353/mmu:19698/mmu:12297/mmu:20111/mmu:11652/mmu:12287/mmu:18654/mmu:14186/mmu:13836/mmu:12540/mmu:17295/mmu:56808/mmu:12977/mmu:17873/mmu:12289/mmu:17164/mmu:12298/mmu:109689/mmu:67603/mmu:13649/mmu:17347/mmu:54377/mmu:12291/mmu:53859/mmu:23882/mmu:26401/mmu:60597/mmu:22339/mmu:58226/mmu:26410/mmu:12978/mmu:14102/mmu:19697/mmu:56613/mmu:18034/mmu:286940/mmu:16177/mmu:269…	90
KEGG	mmu04380	Osteoclast differentiation	47/1155	119/6959	1.57062e-09	1.60203e-07	ENSMUSG00000000409/ENSMUSG00000001847/ENSMUSG00000002111/ENSMUSG00000002325/ENSMUSG00000002699/ENSMUSG00000002983/ENSMUSG00000003545/ENSMUSG00000004056/ENSMUSG00000004508/ENSMUSG00000006519/ENSMUSG00000014599/ENSMUSG00000015837/ENSMUSG00000015947/ENSMUSG00000015950/ENSMUSG00000019843/ENSMUSG00000020941/ENSMUSG00000021457/ENSMUSG00000022965/ENSMUSG00000022971/ENSMUSG00000023992/ENSMUSG00000024621/…	Lck/Rac1/Spi1/Irf9/Lcp2/Relb/Fosb/Akt2/Gab2/Cyba/Csf1/Sqstm1/Fcgr1/Ncf1/Fyn/Map3k14/Syk/Ifngr2/Ifnar2/Trem2/Csf1r/Fosl1/Rela/Nfkb2/Il1r1/Stat1/Ncf2/Fcgr2b/Nfatc2/Nfkb1/Fosl2/Tnfrsf1a/Tyrobp/Tyk2/Tgfbr2/Nfatc1/Plcg2/Tgfb2/Stat2/Mapk10/Jun/Junb/Socs3/Fcgr4/Fcgr3/Mapk3/Jund	mmu:16818/mmu:19353/mmu:20375/mmu:16391/mmu:16822/mmu:19698/mmu:14282/mmu:11652/mmu:14389/mmu:13057/mmu:12977/mmu:18412/mmu:14129/mmu:17969/mmu:14360/mmu:53859/mmu:20963/mmu:15980/mmu:15976/mmu:83433/mmu:12978/mmu:14283/mmu:19697/mmu:18034/mmu:16177/mmu:20846/mmu:17970/mmu:14130/mmu:18019/mmu:18033/mmu:14284/mmu:21937/mmu:22177/mmu:54721/mmu:21813/mmu:18018/mmu:234779/mmu:21808/mmu:20847/mmu:2641…	47
KEGG	mmu04360	Axon guidance	61/1155	178/6959	4.60494e-09	3.52278e-07	ENSMUSG00000000001/ENSMUSG00000000627/ENSMUSG00000001227/ENSMUSG00000001761/ENSMUSG00000001847/ENSMUSG00000002633/ENSMUSG00000005958/ENSMUSG00000006445/ENSMUSG00000006699/ENSMUSG00000007989/ENSMUSG00000009376/ENSMUSG00000016933/ENSMUSG00000019647/ENSMUSG00000019843/ENSMUSG00000020019/ENSMUSG00000020580/ENSMUSG00000021451/ENSMUSG00000021820/ENSMUSG00000022231/ENSMUSG00000022687/ENSMUSG00000022883/…	Gnai3/Sema4f/Sema6b/Smo/Rac1/Shh/Ephb3/Epha2/Cdc42/Fzd3/Met/Plcg1/Sema6a/Fyn/Ntn4/Rock2/Sema4d/Camk2g/Sema5a/Boc/Robo1/Sema4g/Nrp1/Epha4/Plxna2/Nfatc2/Src/Efna1/Epha7/Ephb2/Sema3c/Ablim2/Epha5/Plxna4/Plxna1/Srgap3/Efnb1/L1cam/Plxna3/Slit2/Neo1/Nck1/Gnai2/Rac2/Plcg2/Ssh3/Plxnb2/Rras/Lrrc4/Lrrc4c/Bmpr1b/Robo2/Cfl1/Gnai1/Camk2b/Sema3b/Unc5c/Mapk3/Sema3e/Unc5d/Rgma	mmu:14679/mmu:20355/mmu:20359/mmu:319757/mmu:19353/mmu:20423/mmu:13845/mmu:13836/mmu:12540/mmu:14365/mmu:17295/mmu:18803/mmu:20358/mmu:14360/mmu:57764/mmu:19878/mmu:20354/mmu:12325/mmu:20356/mmu:117606/mmu:19876/mmu:26456/mmu:18186/mmu:13838/mmu:18845/mmu:18019/mmu:20779/mmu:13636/mmu:13841/mmu:13844/mmu:20348/mmu:231148/mmu:13839/mmu:243743/mmu:18844/mmu:259302/mmu:13641/mmu:16728/mmu:18846/mmu:…	61
KEGG	mmu04666	Fc gamma R-mediated phagocytosis	35/1155	85/6959	5.65905e-08	3.46334e-06	ENSMUSG00000001847/ENSMUSG00000003283/ENSMUSG00000004056/ENSMUSG00000004508/ENSMUSG00000006699/ENSMUSG00000015947/ENSMUSG00000015950/ENSMUSG00000016933/ENSMUSG00000020143/ENSMUSG00000020828/ENSMUSG00000021457/ENSMUSG00000022272/ENSMUSG00000024867/ENSMUSG00000026395/ENSMUSG00000026656/ENSMUSG00000028517/ENSMUSG00000029465/ENSMUSG00000029622/ENSMUSG00000030403/ENSMUSG00000031165/ENSMUSG00000032737/…	Rac1/Hck/Akt2/Gab2/Cdc42/Fcgr1/Ncf1/Plcg1/Dock2/Pld2/Syk/Myo10/Pip5k1b/Ptprc/Fcgr2b/Ppap2b/Arpc3/Arpc1b/Vasp/Was/Inppl1/Rac2/Vav3/Vav1/Plcg2/Pip5k1c/Asap3/Lyn/Prkce/Marcksl1/Asap2/Prkcb/Cfl1/Mapk3/Marcks	mmu:19353/mmu:15162/mmu:11652/mmu:14389/mmu:12540/mmu:14129/mmu:17969/mmu:18803/mmu:94176/mmu:18806/mmu:20963/mmu:17909/mmu:18719/mmu:19264/mmu:14130/mmu:67916/mmu:56378/mmu:11867/mmu:22323/mmu:22376/mmu:16332/mmu:19354/mmu:57257/mmu:22324/mmu:234779/mmu:18717/mmu:230837/mmu:17096/mmu:18754/mmu:17357/mmu:211914/mmu:18751/mmu:12631/mmu:26417/mmu:17118	35
KEGG	mmu05140	Leishmaniasis	29/1155	65/6959	9.66984e-08	4.93162e-06	ENSMUSG00000000290/ENSMUSG00000004266/ENSMUSG00000006519/ENSMUSG00000015340/ENSMUSG00000015947/ENSMUSG00000015950/ENSMUSG00000022965/ENSMUSG00000024164/ENSMUSG00000024927/ENSMUSG00000026104/ENSMUSG00000026480/ENSMUSG00000027009/ENSMUSG00000027995/ENSMUSG00000028163/ENSMUSG00000030786/ENSMUSG00000031392/ENSMUSG00000032508/ENSMUSG00000036594/ENSMUSG00000039005/ENSMUSG00000039239/ENSMUSG00000047945/…	Itgb2/Ptpn6/Cyba/Cybb/Fcgr1/Ncf1/Ifngr2/C3/Rela/Stat1/Ncf2/Itga4/Tlr2/Nfkb1/Itgam/Irak1/Myd88/H2-Aa/Tlr4/Tgfb2/Marcksl1/Jun/Prkcb/Fcgr4/Fcgr3/Irak4/H2-Eb1/Mapk3/H2-Ab1	mmu:16414/mmu:15170/mmu:13057/mmu:13058/mmu:14129/mmu:17969/mmu:15980/mmu:12266/mmu:19697/mmu:20846/mmu:17970/mmu:16401/mmu:24088/mmu:18033/mmu:16409/mmu:16179/mmu:17874/mmu:14960/mmu:21898/mmu:21808/mmu:17357/mmu:16476/mmu:18751/mmu:246256/mmu:14131/mmu:266632/mmu:14969/mmu:26417/mmu:14961	29
KEGG	mmu05169	Epstein-Barr virus infection	61/1155	196/6959	2.54113e-07	1.11084e-05	ENSMUSG00000001847/ENSMUSG00000002325/ENSMUSG00000002983/ENSMUSG00000004040/ENSMUSG00000004056/ENSMUSG00000005087/ENSMUSG00000015312/ENSMUSG00000016206/ENSMUSG00000019979/ENSMUSG00000020941/ENSMUSG00000021453/ENSMUSG00000021457/ENSMUSG00000022971/ENSMUSG00000023947/ENSMUSG00000024079/ENSMUSG00000024308/ENSMUSG00000024339/ENSMUSG00000024778/ENSMUSG00000024927/ENSMUSG00000025225/ENSMUSG00000025498/…	Rac1/Irf9/Relb/Stat3/Akt2/Cd44/Gadd45b/H2-M3/Apaf1/Map3k14/Gadd45g/Syk/Ifnar2/Nfkbie/Eif2ak2/Tapbp/Tap2/Fas/Rela/Nfkb2/Irf7/Casp8/Stat1/Traf5/Tlr2/Nfkb1/Hdac1/Oas1b/Irak1/Casp3/Jak3/Tradd/Tyk2/Nedd4/Myd88/Oas2/Ccnd3/Plcg2/Cxcl10/Isg15/H2-Q4/H2-Aa/Tap1/Icam1/Stat2/Ddx58/Lyn/Mapk10/Jun/Oas1a/H2-T22/Irak4/H2-Q7/H2-Eb1/B2m/H2-K1/H2-T23/Ccnd1/H2-Q6/H2-D1/H2-Ab1	mmu:19353/mmu:16391/mmu:19698/mmu:20848/mmu:11652/mmu:12505/mmu:17873/mmu:14991/mmu:11783/mmu:53859/mmu:23882/mmu:20963/mmu:15976/mmu:18037/mmu:19106/mmu:21356/mmu:21355/mmu:14102/mmu:19697/mmu:18034/mmu:54123/mmu:12370/mmu:20846/mmu:22033/mmu:24088/mmu:18033/mmu:433759/mmu:23961/mmu:16179/mmu:12367/mmu:16453/mmu:71609/mmu:54721/mmu:17999/mmu:17874/mmu:246728/mmu:12445/mmu:234779/mmu:15945/mmu:10…	61
KEGG	mmu05133	Pertussis	30/1155	73/6959	5.28834e-07	2.02279e-05	ENSMUSG00000000001/ENSMUSG00000000290/ENSMUSG00000018899/ENSMUSG00000023224/ENSMUSG00000024164/ENSMUSG00000024927/ENSMUSG00000025779/ENSMUSG00000025888/ENSMUSG00000028163/ENSMUSG00000030786/ENSMUSG00000031392/ENSMUSG00000031628/ENSMUSG00000032041/ENSMUSG00000032508/ENSMUSG00000032562/ENSMUSG00000036887/ENSMUSG00000036896/ENSMUSG00000036905/ENSMUSG00000038058/ENSMUSG00000039005/ENSMUSG00000041515/…	Gnai3/Itgb2/Irf1/Serping1/C3/Rela/Ly96/Casp1/Nfkb1/Itgam/Irak1/Casp3/Tirap/Myd88/Gnai2/C1qa/C1qc/C1qb/Nod1/Tlr4/Irf8/Mapk10/Cd14/Jun/C1ra/Cfl1/Gnai1/Irak4/Mapk3/C4b	mmu:14679/mmu:16414/mmu:16362/mmu:12258/mmu:12266/mmu:19697/mmu:17087/mmu:12362/mmu:18033/mmu:16409/mmu:16179/mmu:12367/mmu:117149/mmu:17874/mmu:14678/mmu:12259/mmu:12262/mmu:12260/mmu:107607/mmu:21898/mmu:15900/mmu:26414/mmu:12475/mmu:16476/mmu:50909/mmu:12631/mmu:14677/mmu:266632/mmu:26417/mmu:12268	30
KEGG	mmu05167	Kaposi sarcoma-associated herpesvirus infection	55/1155	177/6959	1.05e-06	3.57e-05	ENSMUSG00000001847/ENSMUSG00000002325/ENSMUSG00000003283/ENSMUSG00000004040/ENSMUSG00000004056/ENSMUSG00000016206/ENSMUSG00000016528/ENSMUSG00000016933/ENSMUSG00000018567/ENSMUSG00000020573/ENSMUSG00000020901/ENSMUSG00000021457/ENSMUSG00000021756/ENSMUSG00000022901/ENSMUSG00000022971/ENSMUSG00000023439/ENSMUSG00000023951/ENSMUSG00000024079/ENSMUSG00000024164/ENSMUSG00000024778/ENSMUSG00000024927/…	Rac1/Irf9/Hck/Stat3/Akt2/H2-M3/Mapkapk2/Plcg1/Gabarap/Pik3cg/Pik3r5/Syk/Il6st/Cd86/Ifnar2/Gnb3/Vegfa/Eif2ak2/C3/Fas/Rela/Irf7/Casp8/Stat1/Nfatc2/Src/Nfkb1/Gnb2/Itpr1/Tnfrsf1a/Casp3/Tlr3/Tradd/Tyk2/Nfatc1/Plcg2/H2-Q4/Gng12/Fgf2/Icam1/Prex1/Stat2/Lyn/Zfp36/Mapk10/Jun/H2-T22/H2-Q7/H2-K1/Mapk3/H2-T23/Ccnd1/H2-Q6/H2-D1/Ccr5	mmu:19353/mmu:16391/mmu:15162/mmu:20848/mmu:11652/mmu:14991/mmu:17164/mmu:18803/mmu:56486/mmu:30955/mmu:320207/mmu:20963/mmu:16195/mmu:12524/mmu:15976/mmu:14695/mmu:22339/mmu:19106/mmu:12266/mmu:14102/mmu:19697/mmu:54123/mmu:12370/mmu:20846/mmu:18019/mmu:20779/mmu:18033/mmu:14693/mmu:16438/mmu:21937/mmu:12367/mmu:142980/mmu:71609/mmu:54721/mmu:18018/mmu:234779/mmu:15015/mmu:14701/mmu:14173/mmu:15…	55
KEGG	mmu05205	Proteoglycans in cancer	59/1155	198/6959	1.99898e-06	6.11689e-05	ENSMUSG00000000126/ENSMUSG00000001761/ENSMUSG00000001847/ENSMUSG00000002489/ENSMUSG00000002633/ENSMUSG00000004040/ENSMUSG00000004056/ENSMUSG00000004266/ENSMUSG00000005087/ENSMUSG00000006699/ENSMUSG00000007655/ENSMUSG00000007989/ENSMUSG00000009376/ENSMUSG00000015533/ENSMUSG00000016933/ENSMUSG00000020044/ENSMUSG00000020122/ENSMUSG00000020580/ENSMUSG00000021820/ENSMUSG00000023951/ENSMUSG00000024486/…	Wnt9a/Smo/Rac1/Tiam1/Shh/Stat3/Akt2/Ptpn6/Cd44/Cdc42/Cav1/Fzd3/Met/Itga2/Plcg1/Timp3/Egfr/Rock2/Camk2g/Vegfa/Hbegf/Fas/Plce1/Flnb/Cd63/Fn1/Itgav/Src/Tlr2/Slc9a1/Itpr1/Cttn/Msn/Flna/Ank1/Fgfr1/Casp3/Gab1/Mras/Gpc1/Plcg2/Fgf2/Rras/Tlr4/Tgfb2/Thbs1/Fzd7/Igf2/Prkcb/Gpc3/Rras2/Camk2b/Erbb2/Kdr/Mapk3/Flnc/Ank3/Ccnd1/Fzd10	mmu:216795/mmu:319757/mmu:19353/mmu:21844/mmu:20423/mmu:20848/mmu:11652/mmu:15170/mmu:12505/mmu:12540/mmu:12389/mmu:14365/mmu:17295/mmu:16398/mmu:18803/mmu:21859/mmu:13649/mmu:19878/mmu:12325/mmu:22339/mmu:15200/mmu:14102/mmu:74055/mmu:286940/mmu:12512/mmu:14268/mmu:16410/mmu:20779/mmu:24088/mmu:20544/mmu:16438/mmu:13043/mmu:17698/mmu:192176/mmu:11733/mmu:14182/mmu:12367/mmu:14388/mmu:17532/mmu:1…	59
KEGG	mmu04064	NF-kappa B signaling pathway	34/1155	94/6959	3.15141e-06	8.76666e-05	ENSMUSG00000000275/ENSMUSG00000000409/ENSMUSG00000002983/ENSMUSG00000015312/ENSMUSG00000016933/ENSMUSG00000020941/ENSMUSG00000021457/ENSMUSG00000024927/ENSMUSG00000025225/ENSMUSG00000025779/ENSMUSG00000026031/ENSMUSG00000026072/ENSMUSG00000026496/ENSMUSG00000026637/ENSMUSG00000027962/ENSMUSG00000028163/ENSMUSG00000030172/ENSMUSG00000030339/ENSMUSG00000030341/ENSMUSG00000031392/ENSMUSG00000031887/…	Trim25/Lck/Relb/Gadd45b/Plcg1/Map3k14/Syk/Rela/Nfkb2/Ly96/Cflar/Il1r1/Parp1/Traf5/Vcam1/Nfkb1/Erc1/Ltbr/Tnfrsf1a/Irak1/Tradd/Birc3/Tirap/Myd88/Card10/Plcg2/Eda2r/Icam1/Tlr4/Ddx58/Lyn/Cd14/Prkcb/Irak4	mmu:217069/mmu:16818/mmu:19698/mmu:17873/mmu:18803/mmu:53859/mmu:20963/mmu:19697/mmu:18034/mmu:17087/mmu:12633/mmu:16177/mmu:11545/mmu:22033/mmu:22329/mmu:18033/mmu:111173/mmu:17000/mmu:21937/mmu:16179/mmu:71609/mmu:11796/mmu:117149/mmu:17874/mmu:105844/mmu:234779/mmu:245527/mmu:15894/mmu:21898/mmu:230073/mmu:17096/mmu:12475/mmu:18751/mmu:266632	34
KEGG	mmu04621	NOD-like receptor signaling pathway	47/1155	149/6959	4.03457e-06	0.000102882	ENSMUSG00000002325/ENSMUSG00000006519/ENSMUSG00000009292/ENSMUSG00000015340/ENSMUSG00000018567/ENSMUSG00000021709/ENSMUSG00000022575/ENSMUSG00000022971/ENSMUSG00000023348/ENSMUSG00000024349/ENSMUSG00000024927/ENSMUSG00000025498/ENSMUSG00000025887/ENSMUSG00000025888/ENSMUSG00000026029/ENSMUSG00000026104/ENSMUSG00000026289/ENSMUSG00000026637/ENSMUSG00000028163/ENSMUSG00000028268/ENSMUSG00000028270/…	Irf9/Cyba/Trpm2/Cybb/Gabarap/Erbb2ip/Gsdmd/Ifnar2/Trip6/Tmem173/Rela/Irf7/Casp12/Casp1/Casp8/Stat1/Atg16l1/Traf5/Nfkb1/Gbp3/Gbp2/Antxr2/P2rx7/Oas1b/Itpr1/Birc3/Tyk2/Myd88/Oas2/Ccl12/Nod1/Txnip/Tlr4/Plcb4/Stat2/Gbp7/Gbp5/Mapk10/Rnf31/Jun/Oas1a/Irak4/Mapk3/Ifi204/AI607873/Naip6/Naip2	mmu:16391/mmu:13057/mmu:28240/mmu:13058/mmu:56486/mmu:59079/mmu:69146/mmu:15976/mmu:22051/mmu:72512/mmu:19697/mmu:54123/mmu:12364/mmu:12362/mmu:12370/mmu:20846/mmu:77040/mmu:22033/mmu:18033/mmu:55932/mmu:14469/mmu:71914/mmu:18439/mmu:23961/mmu:16438/mmu:11796/mmu:54721/mmu:17874/mmu:246728/mmu:20293/mmu:107607/mmu:56338/mmu:21898/mmu:18798/mmu:20847/mmu:229900/mmu:14468/mmu:26414/mmu:268749/mmu:1…	47
KEGG	mmu04933	AGE-RAGE signaling pathway in diabetic complications	35/1155	100/6959	5.36042e-06	0.000117522	ENSMUSG00000001847/ENSMUSG00000004040/ENSMUSG00000004056/ENSMUSG00000006699/ENSMUSG00000010660/ENSMUSG00000015340/ENSMUSG00000016933/ENSMUSG00000020919/ENSMUSG00000023951/ENSMUSG00000024014/ENSMUSG00000024927/ENSMUSG00000024998/ENSMUSG00000026104/ENSMUSG00000026173/ENSMUSG00000026193/ENSMUSG00000027962/ENSMUSG00000028128/ENSMUSG00000028163/ENSMUSG00000031502/ENSMUSG00000031628/ENSMUSG00000031980/…	Rac1/Stat3/Akt2/Cdc42/Plcd1/Cybb/Plcg1/Stat5b/Vegfa/Pim1/Rela/Plce1/Stat1/Plcd4/Fn1/Vcam1/F3/Nfkb1/Col4a1/Casp3/Agt/Smad3/Tgfbr2/Nfatc1/Plcg2/Ccl12/Icam1/Tgfb2/Plcb4/Prkce/Mapk10/Jun/Prkcb/Mapk3/Ccnd1	mmu:19353/mmu:20848/mmu:11652/mmu:12540/mmu:18799/mmu:13058/mmu:18803/mmu:20851/mmu:22339/mmu:18712/mmu:19697/mmu:74055/mmu:20846/mmu:18802/mmu:14268/mmu:22329/mmu:14066/mmu:18033/mmu:12826/mmu:12367/mmu:11606/mmu:17127/mmu:21813/mmu:18018/mmu:234779/mmu:20293/mmu:15894/mmu:21808/mmu:18798/mmu:18754/mmu:26414/mmu:16476/mmu:18751/mmu:26417/mmu:12443	35
KEGG	mmu05164	Influenza A	45/1155	142/6959	5.62821e-06	0.000117522	ENSMUSG00000000275/ENSMUSG00000002325/ENSMUSG00000004056/ENSMUSG00000005483/ENSMUSG00000009941/ENSMUSG00000019979/ENSMUSG00000020641/ENSMUSG00000022965/ENSMUSG00000022971/ENSMUSG00000023341/ENSMUSG00000024079/ENSMUSG00000024778/ENSMUSG00000024810/ENSMUSG00000024927/ENSMUSG00000025498/ENSMUSG00000025888/ENSMUSG00000026029/ENSMUSG00000026104/ENSMUSG00000026896/ENSMUSG00000027951/ENSMUSG00000028163/…	Trim25/Irf9/Akt2/Dnajb1/Nxf2/Apaf1/Rsad2/Ifngr2/Ifnar2/Mx2/Eif2ak2/Fas/Il33/Rela/Irf7/Casp1/Casp8/Stat1/Ifih1/Adar/Nfkb1/Oas1b/Tnfrsf1a/Casp3/Tlr3/Tradd/Tyk2/Myd88/Oas2/Ccnd3/Cxcl10/Ccl12/H2-Aa/Icam1/Tlr4/Stat2/Ddx58/Tlr7/Oas1a/Prkcb/Socs3/Irak4/H2-Eb1/Mapk3/H2-Ab1	mmu:217069/mmu:16391/mmu:11652/mmu:81489/mmu:83454/mmu:11783/mmu:58185/mmu:15980/mmu:15976/mmu:17858/mmu:19106/mmu:14102/mmu:77125/mmu:19697/mmu:54123/mmu:12362/mmu:12370/mmu:20846/mmu:71586/mmu:56417/mmu:18033/mmu:23961/mmu:21937/mmu:12367/mmu:142980/mmu:71609/mmu:54721/mmu:17874/mmu:246728/mmu:12445/mmu:15945/mmu:20293/mmu:14960/mmu:15894/mmu:21898/mmu:20847/mmu:230073/mmu:170743/mmu:246730/mmu…	45
KEGG	mmu04510	Focal adhesion	57/1155	195/6959	5.7609e-06	0.000117522	ENSMUSG00000001119/ENSMUSG00000001507/ENSMUSG00000001847/ENSMUSG00000001930/ENSMUSG00000004056/ENSMUSG00000004791/ENSMUSG00000006699/ENSMUSG00000007655/ENSMUSG00000009376/ENSMUSG00000015533/ENSMUSG00000015647/ENSMUSG00000015829/ENSMUSG00000019843/ENSMUSG00000020122/ENSMUSG00000020241/ENSMUSG00000020312/ENSMUSG00000020580/ENSMUSG00000020758/ENSMUSG00000021448/ENSMUSG00000021702/ENSMUSG00000022438/…	Col6a1/Itga3/Rac1/Vwf/Akt2/Pgf/Cdc42/Cav1/Met/Itga2/Lama5/Tnr/Fyn/Egfr/Col6a2/Shc2/Rock2/Itgb4/Shc3/Thbs4/Parvb/Col2a1/Vegfa/Flnb/Itgb8/Fn1/Capn2/Itga4/Itgav/Src/Flt1/Zyx/Vasp/Parva/Flna/Col4a1/Birc3/Rac2/Tnxb/Vav3/Vav1/Ccnd3/Itga2b/Pip5k1c/Itga9/Thbs1/Reln/Mapk10/Jun/Prkcb/Lamb2/Dock1/Erbb2/Kdr/Mapk3/Flnc/Ccnd1	mmu:12833/mmu:16400/mmu:19353/mmu:22371/mmu:11652/mmu:18654/mmu:12540/mmu:12389/mmu:17295/mmu:16398/mmu:16776/mmu:21960/mmu:14360/mmu:13649/mmu:12834/mmu:216148/mmu:19878/mmu:192897/mmu:20418/mmu:21828/mmu:170736/mmu:12824/mmu:22339/mmu:286940/mmu:320910/mmu:14268/mmu:12334/mmu:16401/mmu:16410/mmu:20779/mmu:14254/mmu:22793/mmu:22323/mmu:57342/mmu:192176/mmu:12826/mmu:11796/mmu:19354/mmu:81877/mmu…	57
KEGG	mmu05145	Toxoplasmosis	36/1155	105/6959	6.77341e-06	0.000129541	ENSMUSG00000000001/ENSMUSG00000004040/ENSMUSG00000004056/ENSMUSG00000015647/ENSMUSG00000020573/ENSMUSG00000020901/ENSMUSG00000022965/ENSMUSG00000022969/ENSMUSG00000024927/ENSMUSG00000025779/ENSMUSG00000026029/ENSMUSG00000026104/ENSMUSG00000027995/ENSMUSG00000028163/ENSMUSG00000030341/ENSMUSG00000031392/ENSMUSG00000031628/ENSMUSG00000031748/ENSMUSG00000032000/ENSMUSG00000032089/ENSMUSG00000032175/…	Gnai3/Stat3/Akt2/Lama5/Pik3cg/Pik3r5/Ifngr2/Il10rb/Rela/Ly96/Casp8/Stat1/Tlr2/Nfkb1/Tnfrsf1a/Irak1/Casp3/Gnao1/Birc3/Il10ra/Tyk2/Myd88/Gnai2/H2-Aa/Tlr4/Tgfb2/Mapk10/Irgm1/Lamb2/Gnai1/Irak4/H2-Eb1/Mapk3/H2-Ab1/Igtp/Ccr5	mmu:14679/mmu:20848/mmu:11652/mmu:16776/mmu:30955/mmu:320207/mmu:15980/mmu:16155/mmu:19697/mmu:17087/mmu:12370/mmu:20846/mmu:24088/mmu:18033/mmu:21937/mmu:16179/mmu:12367/mmu:14681/mmu:11796/mmu:16154/mmu:54721/mmu:17874/mmu:14678/mmu:14960/mmu:21898/mmu:21808/mmu:26414/mmu:15944/mmu:16779/mmu:14677/mmu:266632/mmu:14969/mmu:26417/mmu:14961/mmu:16145/mmu:12774	36
KEGG	mmu05152	Tuberculosis	48/1155	157/6959	8.35708e-06	0.000150428	ENSMUSG00000000290/ENSMUSG00000001750/ENSMUSG00000004056/ENSMUSG00000007891/ENSMUSG00000015947/ENSMUSG00000016534/ENSMUSG00000018334/ENSMUSG00000019302/ENSMUSG00000019979/ENSMUSG00000021457/ENSMUSG00000021820/ENSMUSG00000022965/ENSMUSG00000022969/ENSMUSG00000024164/ENSMUSG00000024927/ENSMUSG00000026029/ENSMUSG00000026104/ENSMUSG00000026656/ENSMUSG00000026712/ENSMUSG00000027646/ENSMUSG00000027995/…	Itgb2/Tcirg1/Akt2/Ctsd/Fcgr1/Lamp2/Ksr1/Atp6v0a1/Apaf1/Syk/Camk2g/Ifngr2/Il10rb/C3/Rela/Casp8/Stat1/Fcgr2b/Mrc1/Src/Tlr2/Nfkb1/Tnfrsf1a/Itgam/Itgax/Irak1/Casp3/Tradd/Tirap/Il10ra/Myd88/H2-Aa/Atp6v0a2/Ctss/Tlr4/Tgfb2/Mapk10/Cd14/Cebpb/Camk2b/Fcer1g/Fcgr4/Fcgr3/Irak4/Irak2/H2-Eb1/Mapk3/H2-Ab1	mmu:16414/mmu:27060/mmu:11652/mmu:13033/mmu:14129/mmu:16784/mmu:16706/mmu:11975/mmu:11783/mmu:20963/mmu:12325/mmu:15980/mmu:16155/mmu:12266/mmu:19697/mmu:12370/mmu:20846/mmu:14130/mmu:17533/mmu:20779/mmu:24088/mmu:18033/mmu:21937/mmu:16409/mmu:16411/mmu:16179/mmu:12367/mmu:71609/mmu:117149/mmu:16154/mmu:17874/mmu:14960/mmu:21871/mmu:13040/mmu:21898/mmu:21808/mmu:26414/mmu:12475/mmu:12608/mmu:1232…	48
KEGG	mmu04668	TNF signaling pathway	35/1155	106/6959	2.29997e-05	0.000390995	ENSMUSG00000000957/ENSMUSG00000004056/ENSMUSG00000014599/ENSMUSG00000018899/ENSMUSG00000020941/ENSMUSG00000024235/ENSMUSG00000024778/ENSMUSG00000024927/ENSMUSG00000024952/ENSMUSG00000026029/ENSMUSG00000026031/ENSMUSG00000026637/ENSMUSG00000026883/ENSMUSG00000027962/ENSMUSG00000028163/ENSMUSG00000028599/ENSMUSG00000030341/ENSMUSG00000031628/ENSMUSG00000031778/ENSMUSG00000031887/ENSMUSG00000032000/…	Mmp14/Akt2/Csf1/Irf1/Map3k14/Map3k8/Fas/Rela/Rps6ka4/Casp8/Cflar/Traf5/Dab2ip/Vcam1/Nfkb1/Tnfrsf1b/Tnfrsf1a/Casp3/Cx3cl1/Tradd/Birc3/Lif/Cxcl10/Ccl12/Icam1/Creb3l2/Mapk10/Jun/Junb/Socs3/Bcl3/Cebpb/Mapk3/Map3k5/Ifi47	mmu:17387/mmu:11652/mmu:12977/mmu:16362/mmu:53859/mmu:26410/mmu:14102/mmu:19697/mmu:56613/mmu:12370/mmu:12633/mmu:22033/mmu:69601/mmu:22329/mmu:18033/mmu:21938/mmu:21937/mmu:12367/mmu:20312/mmu:71609/mmu:11796/mmu:16878/mmu:15945/mmu:20293/mmu:15894/mmu:208647/mmu:26414/mmu:16476/mmu:16477/mmu:12702/mmu:12051/mmu:12608/mmu:26417/mmu:26408/mmu:15953	35
KEGG	mmu04662	B cell receptor signaling pathway	26/1155	70/6959	2.63159e-05	0.000407664	ENSMUSG00000001847/ENSMUSG00000004056/ENSMUSG00000004266/ENSMUSG00000021457/ENSMUSG00000023947/ENSMUSG00000024927/ENSMUSG00000025017/ENSMUSG00000025491/ENSMUSG00000026656/ENSMUSG00000027544/ENSMUSG00000028159/ENSMUSG00000028163/ENSMUSG00000028459/ENSMUSG00000030577/ENSMUSG00000032737/ENSMUSG00000033016/ENSMUSG00000033220/ENSMUSG00000033721/ENSMUSG00000034116/ENSMUSG00000034330/ENSMUSG00000037706/…	Rac1/Akt2/Ptpn6/Syk/Nfkbie/Rela/Pik3ap1/Ifitm1/Fcgr2b/Nfatc2/Dapp1/Nfkb1/Cd72/Cd22/Inppl1/Nfatc1/Rac2/Vav3/Vav1/Plcg2/Cd81/Lyn/Jun/Prkcb/Mapk3/Rasgrp3	mmu:19353/mmu:11652/mmu:15170/mmu:20963/mmu:18037/mmu:19697/mmu:83490/mmu:68713/mmu:14130/mmu:18019/mmu:26377/mmu:18033/mmu:12517/mmu:12483/mmu:16332/mmu:18018/mmu:19354/mmu:57257/mmu:22324/mmu:234779/mmu:12520/mmu:17096/mmu:16476/mmu:18751/mmu:26417/mmu:240168	26
KEGG	mmu05162	Measles	40/1155	128/6959	2.66447e-05	0.000407664	ENSMUSG00000002083/ENSMUSG00000002325/ENSMUSG00000004040/ENSMUSG00000004056/ENSMUSG00000016493/ENSMUSG00000019979/ENSMUSG00000020919/ENSMUSG00000022971/ENSMUSG00000023341/ENSMUSG00000024079/ENSMUSG00000024778/ENSMUSG00000024927/ENSMUSG00000025498/ENSMUSG00000026029/ENSMUSG00000026104/ENSMUSG00000026656/ENSMUSG00000026896/ENSMUSG00000027951/ENSMUSG00000027995/ENSMUSG00000028163/ENSMUSG00000029605/…	Bbc3/Irf9/Stat3/Akt2/Cd46/Apaf1/Stat5b/Ifnar2/Mx2/Eif2ak2/Fas/Rela/Irf7/Casp8/Stat1/Fcgr2b/Ifih1/Adar/Tlr2/Nfkb1/Oas1b/Msn/Irak1/Casp3/Eif2ak3/Jak3/Tradd/Tyk2/Myd88/Oas2/Ccnd3/Tlr4/Stat2/Ddx58/Tlr7/Mapk10/Jun/Oas1a/Irak4/Ccnd1	mmu:170770/mmu:16391/mmu:20848/mmu:11652/mmu:17221/mmu:11783/mmu:20851/mmu:15976/mmu:17858/mmu:19106/mmu:14102/mmu:19697/mmu:54123/mmu:12370/mmu:20846/mmu:14130/mmu:71586/mmu:56417/mmu:24088/mmu:18033/mmu:23961/mmu:17698/mmu:16179/mmu:12367/mmu:13666/mmu:16453/mmu:71609/mmu:54721/mmu:17874/mmu:246728/mmu:12445/mmu:21898/mmu:20847/mmu:230073/mmu:170743/mmu:26414/mmu:16476/mmu:246730/mmu:266632/mmu…	40
KEGG	mmu04145	Phagosome	46/1155	155/6959	2.99264e-05	0.000422109	ENSMUSG00000000290/ENSMUSG00000001473/ENSMUSG00000001750/ENSMUSG00000001847/ENSMUSG00000006519/ENSMUSG00000015340/ENSMUSG00000015533/ENSMUSG00000015947/ENSMUSG00000015950/ENSMUSG00000016206/ENSMUSG00000016534/ENSMUSG00000019302/ENSMUSG00000019998/ENSMUSG00000021702/ENSMUSG00000024164/ENSMUSG00000024339/ENSMUSG00000024403/ENSMUSG00000026480/ENSMUSG00000026656/ENSMUSG00000026712/ENSMUSG00000027087/…	Itgb2/Tubb6/Tcirg1/Rac1/Cyba/Cybb/Itga2/Fcgr1/Ncf1/H2-M3/Lamp2/Atp6v0a1/Stx7/Thbs4/C3/Tap2/Atp6v1g2/Ncf2/Fcgr2b/Mrc1/Itgav/Tlr2/Tuba8/Itgam/H2-Q4/H2-Aa/Tap1/Atp6v0a2/Ctss/Tlr4/Thbs1/Tubb2b/Cd14/5430435G22Rik/C1ra/H2-T22/Tubb2a/Fcgr4/Fcgr3/H2-Q7/H2-Eb1/H2-K1/H2-T23/H2-Q6/H2-D1/H2-Ab1	mmu:16414/mmu:67951/mmu:27060/mmu:19353/mmu:13057/mmu:13058/mmu:16398/mmu:14129/mmu:17969/mmu:14991/mmu:16784/mmu:11975/mmu:53331/mmu:21828/mmu:12266/mmu:21355/mmu:66237/mmu:17970/mmu:14130/mmu:17533/mmu:16410/mmu:24088/mmu:53857/mmu:16409/mmu:15015/mmu:14960/mmu:21354/mmu:21871/mmu:13040/mmu:21898/mmu:21825/mmu:73710/mmu:12475/mmu:226421/mmu:50909/mmu:15039/mmu:22151/mmu:246256/mmu:14131/mmu:110…	46
KEGG	mmu04210	Apoptosis	41/1155	133/6959	3.03477e-05	0.000422109	ENSMUSG00000002083/ENSMUSG00000004056/ENSMUSG00000007891/ENSMUSG00000015312/ENSMUSG00000016256/ENSMUSG00000019979/ENSMUSG00000020941/ENSMUSG00000021453/ENSMUSG00000023249/ENSMUSG00000024778/ENSMUSG00000024927/ENSMUSG00000025887/ENSMUSG00000026029/ENSMUSG00000026031/ENSMUSG00000026496/ENSMUSG00000026509/ENSMUSG00000026883/ENSMUSG00000028015/ENSMUSG00000028063/ENSMUSG00000028072/ENSMUSG00000028163/…	Bbc3/Akt2/Ctsd/Gadd45b/Ctsz/Apaf1/Map3k14/Gadd45g/Parp3/Fas/Rela/Casp12/Casp8/Cflar/Parp1/Capn2/Dab2ip/Ctso/Lmna/Ntrk1/Nfkb1/Itpr1/Tuba8/Tnfrsf1a/Ctsc/Casp3/Eif2ak3/Tradd/Birc3/Ctsh/Ptpn13/Mcl1/Ctss/Mapk10/Jun/Parp4/Sptan1/Mapk3/Il3ra/Map3k5/Csf2rb	mmu:170770/mmu:11652/mmu:13033/mmu:17873/mmu:64138/mmu:11783/mmu:53859/mmu:23882/mmu:235587/mmu:14102/mmu:19697/mmu:12364/mmu:12370/mmu:12633/mmu:11545/mmu:12334/mmu:69601/mmu:229445/mmu:16905/mmu:18211/mmu:18033/mmu:16438/mmu:53857/mmu:21937/mmu:13032/mmu:12367/mmu:13666/mmu:71609/mmu:11796/mmu:13036/mmu:19249/mmu:17210/mmu:13040/mmu:26414/mmu:16476/mmu:328417/mmu:20740/mmu:26417/mmu:16188/mmu:2…	41
KEGG	mmu04640	Hematopoietic cell lineage	30/1155	87/6959	3.45219e-05	0.000459292	ENSMUSG00000001507/ENSMUSG00000004609/ENSMUSG00000005087/ENSMUSG00000014599/ENSMUSG00000015533/ENSMUSG00000015947/ENSMUSG00000024621/ENSMUSG00000026072/ENSMUSG00000027009/ENSMUSG00000027947/ENSMUSG00000028076/ENSMUSG00000028859/ENSMUSG00000029084/ENSMUSG00000030342/ENSMUSG00000030577/ENSMUSG00000030748/ENSMUSG00000030786/ENSMUSG00000030798/ENSMUSG00000032679/ENSMUSG00000034664/ENSMUSG00000036594/…	Itga3/Cd33/Cd44/Csf1/Itga2/Fcgr1/Csf1r/Il1r1/Itga4/Il6ra/Cd1d1/Csf3r/Cd38/Cd9/Cd22/Il4ra/Itgam/Cd37/Cd59a/Itga2b/H2-Aa/Flt3/Cd24a/Cd14/Siglech/Csf2ra/H2-Eb1/Cd59b/Il3ra/H2-Ab1	mmu:16400/mmu:12489/mmu:12505/mmu:12977/mmu:16398/mmu:14129/mmu:12978/mmu:16177/mmu:16401/mmu:16194/mmu:12479/mmu:12986/mmu:12494/mmu:12527/mmu:12483/mmu:16190/mmu:16409/mmu:12493/mmu:12509/mmu:16399/mmu:14960/mmu:14255/mmu:12484/mmu:12475/mmu:233274/mmu:12982/mmu:14969/mmu:333883/mmu:16188/mmu:14961	30
KEGG	mmu05150	Staphylococcus aureus infection	21/1155	52/6959	3.67846e-05	0.000469004	ENSMUSG00000000290/ENSMUSG00000015947/ENSMUSG00000024164/ENSMUSG00000026365/ENSMUSG00000026656/ENSMUSG00000030786/ENSMUSG00000036594/ENSMUSG00000036887/ENSMUSG00000036896/ENSMUSG00000036905/ENSMUSG00000037405/ENSMUSG00000040552/ENSMUSG00000048163/ENSMUSG00000049130/ENSMUSG00000055172/ENSMUSG00000058952/ENSMUSG00000059089/ENSMUSG00000059498/ENSMUSG00000060586/ENSMUSG00000073418/ENSMUSG00000073421	Itgb2/Fcgr1/C3/Cfh/Fcgr2b/Itgam/H2-Aa/C1qa/C1qc/C1qb/Icam1/C3ar1/Selplg/C5ar1/C1ra/Cfi/Fcgr4/Fcgr3/H2-Eb1/C4b/H2-Ab1	mmu:16414/mmu:14129/mmu:12266/mmu:12628/mmu:14130/mmu:16409/mmu:14960/mmu:12259/mmu:12262/mmu:12260/mmu:15894/mmu:12267/mmu:20345/mmu:12273/mmu:50909/mmu:12630/mmu:246256/mmu:14131/mmu:14969/mmu:12268/mmu:14961	21
KEGG	mmu04724	Glutamatergic synapse	36/1155	113/6959	4.22104e-05	0.000516655	ENSMUSG00000000001/ENSMUSG00000000617/ENSMUSG00000001985/ENSMUSG00000001986/ENSMUSG00000003279/ENSMUSG00000003378/ENSMUSG00000005360/ENSMUSG00000015968/ENSMUSG00000020524/ENSMUSG00000020654/ENSMUSG00000020828/ENSMUSG00000022462/ENSMUSG00000022623/ENSMUSG00000022935/ENSMUSG00000023439/ENSMUSG00000024935/ENSMUSG00000025813/ENSMUSG00000025892/ENSMUSG00000026959/ENSMUSG00000029713/ENSMUSG00000030102/…	Gnai3/Grm6/Grik3/Gria3/Dlgap1/Grik5/Slc1a3/Cacna1d/Gria1/Adcy3/Pld2/Slc38a2/Shank3/Grik1/Gnb3/Slc1a1/Homer2/Gria4/Grin1/Gnb2/Itpr1/Gnao1/Gnai2/Gria2/Cacna1a/Gng12/Shank2/Shank1/Plcb4/Adrbk2/Cacna1c/Prkcb/Grik2/Grm7/Gnai1/Mapk3	mmu:14679/mmu:108072/mmu:14807/mmu:53623/mmu:224997/mmu:14809/mmu:20512/mmu:12289/mmu:14799/mmu:104111/mmu:18806/mmu:67760/mmu:58234/mmu:14805/mmu:14695/mmu:20510/mmu:26557/mmu:14802/mmu:14810/mmu:14693/mmu:16438/mmu:14681/mmu:14678/mmu:14800/mmu:12286/mmu:14701/mmu:210274/mmu:243961/mmu:18798/mmu:320129/mmu:12288/mmu:18751/mmu:14806/mmu:108073/mmu:14677/mmu:26417	36
KEGG	mmu04062	Chemokine signaling pathway	49/1155	175/6959	8.73656e-05	0.00102823	ENSMUSG00000000001/ENSMUSG00000000982/ENSMUSG00000001847/ENSMUSG00000002489/ENSMUSG00000003283/ENSMUSG00000004040/ENSMUSG00000004056/ENSMUSG00000006699/ENSMUSG00000015950/ENSMUSG00000018909/ENSMUSG00000018927/ENSMUSG00000019122/ENSMUSG00000020143/ENSMUSG00000020312/ENSMUSG00000020573/ENSMUSG00000020580/ENSMUSG00000020654/ENSMUSG00000020901/ENSMUSG00000020919/ENSMUSG00000021448/ENSMUSG00000021508/…	Gnai3/Ccl3/Rac1/Tiam1/Hck/Stat3/Akt2/Cdc42/Ncf1/Arrb1/Ccl6/Ccl9/Dock2/Shc2/Pik3cg/Rock2/Adcy3/Pik3r5/Stat5b/Shc3/Cxcl14/Gnb3/Rela/Stat1/Src/Nfkb1/Fgr/Gnb2/Was/Cx3cl1/Jak3/Gnai2/Rac2/Vav3/Vav1/Cxcl10/Ccl12/Gng12/Prex1/Plcb4/Stat2/Elmo1/Lyn/Adrbk2/Cx3cr1/Prkcb/Gnai1/Mapk3/Ccr5	mmu:14679/mmu:20302/mmu:19353/mmu:21844/mmu:15162/mmu:20848/mmu:11652/mmu:12540/mmu:17969/mmu:109689/mmu:20305/mmu:20308/mmu:94176/mmu:216148/mmu:30955/mmu:19878/mmu:104111/mmu:320207/mmu:20851/mmu:20418/mmu:57266/mmu:14695/mmu:19697/mmu:20846/mmu:20779/mmu:18033/mmu:14191/mmu:14693/mmu:22376/mmu:20312/mmu:16453/mmu:14678/mmu:19354/mmu:57257/mmu:22324/mmu:15945/mmu:20293/mmu:14701/mmu:277360/mmu:…	49
KEGG	mmu04650	Natural killer cell mediated cytotoxicity	30/1155	93/6959	0.000140246	0.00158945	ENSMUSG00000000290/ENSMUSG00000000409/ENSMUSG00000001847/ENSMUSG00000002699/ENSMUSG00000004266/ENSMUSG00000016933/ENSMUSG00000019843/ENSMUSG00000020312/ENSMUSG00000021448/ENSMUSG00000021457/ENSMUSG00000022965/ENSMUSG00000022971/ENSMUSG00000024778/ENSMUSG00000027544/ENSMUSG00000030579/ENSMUSG00000031628/ENSMUSG00000033016/ENSMUSG00000033220/ENSMUSG00000033721/ENSMUSG00000034116/ENSMUSG00000034330/…	Itgb2/Lck/Rac1/Lcp2/Ptpn6/Plcg1/Fyn/Shc2/Shc3/Syk/Ifngr2/Ifnar2/Fas/Nfatc2/Tyrobp/Casp3/Nfatc1/Rac2/Vav3/Vav1/Plcg2/Icam1/Prkcb/Sh3bp2/Fcer1g/Fcgr4/H2-K1/Mapk3/H2-T23/H2-D1	mmu:16414/mmu:16818/mmu:19353/mmu:16822/mmu:15170/mmu:18803/mmu:14360/mmu:216148/mmu:20418/mmu:20963/mmu:15980/mmu:15976/mmu:14102/mmu:18019/mmu:22177/mmu:12367/mmu:18018/mmu:19354/mmu:57257/mmu:22324/mmu:234779/mmu:15894/mmu:18751/mmu:24055/mmu:14127/mmu:246256/mmu:14972/mmu:26417/mmu:15040/mmu:14964	30
KEGG	mmu05142	Chagas disease (American trypanosomiasis)	32/1155	102/6959	0.000153502	0.00167756	ENSMUSG00000000001/ENSMUSG00000000982/ENSMUSG00000004056/ENSMUSG00000022965/ENSMUSG00000024164/ENSMUSG00000024697/ENSMUSG00000024778/ENSMUSG00000024927/ENSMUSG00000026029/ENSMUSG00000026031/ENSMUSG00000027995/ENSMUSG00000028163/ENSMUSG00000030341/ENSMUSG00000031392/ENSMUSG00000031748/ENSMUSG00000032402/ENSMUSG00000032440/ENSMUSG00000032508/ENSMUSG00000032562/ENSMUSG00000034792/ENSMUSG00000035352/…	Gnai3/Ccl3/Akt2/Ifngr2/C3/Gna14/Fas/Rela/Casp8/Cflar/Tlr2/Nfkb1/Tnfrsf1a/Irak1/Gnao1/Smad3/Tgfbr2/Myd88/Gnai2/Gna15/Ccl12/C1qa/C1qc/C1qb/Tlr4/Tgfb2/Plcb4/Mapk10/Jun/Gnai1/Irak4/Mapk3	mmu:14679/mmu:20302/mmu:11652/mmu:15980/mmu:12266/mmu:14675/mmu:14102/mmu:19697/mmu:12370/mmu:12633/mmu:24088/mmu:18033/mmu:21937/mmu:16179/mmu:14681/mmu:17127/mmu:21813/mmu:17874/mmu:14678/mmu:14676/mmu:20293/mmu:12259/mmu:12262/mmu:12260/mmu:21898/mmu:21808/mmu:18798/mmu:26414/mmu:16476/mmu:14677/mmu:266632/mmu:26417	32
KEGG	mmu05170	Human immunodeficiency virus 1 infection	54/1155	205/6959	0.000224623	0.00229228	ENSMUSG00000000001/ENSMUSG00000001847/ENSMUSG00000004056/ENSMUSG00000009585/ENSMUSG00000016206/ENSMUSG00000016933/ENSMUSG00000020271/ENSMUSG00000023439/ENSMUSG00000024308/ENSMUSG00000024339/ENSMUSG00000024349/ENSMUSG00000024778/ENSMUSG00000024927/ENSMUSG00000026029/ENSMUSG00000026637/ENSMUSG00000027544/ENSMUSG00000027995/ENSMUSG00000028163/ENSMUSG00000028599/ENSMUSG00000029713/ENSMUSG00000030102/…	Gnai3/Rac1/Akt2/Apobec3/H2-M3/Plcg1/Fbxw11/Gnb3/Tapbp/Tap2/Tmem173/Fas/Rela/Casp8/Traf5/Nfatc2/Tlr2/Nfkb1/Tnfrsf1b/Gnb2/Itpr1/Tnfrsf1a/Ap1s2/Irak1/Casp3/Gnao1/Tradd/Myd88/Gnai2/Nfatc1/Rac2/Plcg2/H2-Q4/Gng12/Tap1/Tlr4/Mapk10/Bst2/Jun/Prkcb/H2-T22/Cfl1/Trim12c/Trim30d/Gnai1/Irak4/H2-Q7/B2m/H2-K1/Mapk3/H2-T23/H2-Q6/H2-D1/Ccr5	mmu:14679/mmu:19353/mmu:11652/mmu:80287/mmu:14991/mmu:18803/mmu:103583/mmu:14695/mmu:21356/mmu:21355/mmu:72512/mmu:14102/mmu:19697/mmu:12370/mmu:22033/mmu:18019/mmu:24088/mmu:18033/mmu:21938/mmu:14693/mmu:16438/mmu:21937/mmu:108012/mmu:16179/mmu:12367/mmu:14681/mmu:71609/mmu:17874/mmu:14678/mmu:18018/mmu:19354/mmu:234779/mmu:15015/mmu:14701/mmu:21354/mmu:21898/mmu:26414/mmu:69550/mmu:16476/mmu:18…	54
KEGG	mmu04520	Adherens junction	24/1155	70/6959	0.000227378	0.00229228	ENSMUSG00000001847/ENSMUSG00000004266/ENSMUSG00000006411/ENSMUSG00000006699/ENSMUSG00000009376/ENSMUSG00000019843/ENSMUSG00000020122/ENSMUSG00000022656/ENSMUSG00000025314/ENSMUSG00000027540/ENSMUSG00000027646/ENSMUSG00000031165/ENSMUSG00000031565/ENSMUSG00000032012/ENSMUSG00000032402/ENSMUSG00000032440/ENSMUSG00000033220/ENSMUSG00000033278/ENSMUSG00000033295/ENSMUSG00000055799/ENSMUSG00000062300/…	Rac1/Ptpn6/Pvrl4/Cdc42/Met/Fyn/Egfr/Pvrl3/Ptprj/Ptpn1/Src/Was/Fgfr1/Pvrl1/Smad3/Tgfbr2/Rac2/Ptprm/Ptprf/Tcf7l1/Pvrl2/Erbb2/Ctnna2/Mapk3	mmu:19353/mmu:15170/mmu:71740/mmu:12540/mmu:17295/mmu:14360/mmu:13649/mmu:58998/mmu:19271/mmu:19246/mmu:20779/mmu:22376/mmu:14182/mmu:58235/mmu:17127/mmu:21813/mmu:19354/mmu:19274/mmu:19268/mmu:21415/mmu:19294/mmu:13866/mmu:12386/mmu:26417	24
KEGG	mmu05416	Viral myocarditis	23/1155	66/6959	0.000232225	0.00229228	ENSMUSG00000000290/ENSMUSG00000001847/ENSMUSG00000007655/ENSMUSG00000016206/ENSMUSG00000019843/ENSMUSG00000022901/ENSMUSG00000026029/ENSMUSG00000029156/ENSMUSG00000031628/ENSMUSG00000033220/ENSMUSG00000035929/ENSMUSG00000036594/ENSMUSG00000037405/ENSMUSG00000039952/ENSMUSG00000056116/ENSMUSG00000060550/ENSMUSG00000060586/ENSMUSG00000061232/ENSMUSG00000067212/ENSMUSG00000070348/ENSMUSG00000073409/…	Itgb2/Rac1/Cav1/H2-M3/Fyn/Cd86/Casp8/Sgcb/Casp3/Rac2/H2-Q4/H2-Aa/Icam1/Dag1/H2-T22/H2-Q7/H2-Eb1/H2-K1/H2-T23/Ccnd1/H2-Q6/H2-D1/H2-Ab1	mmu:16414/mmu:19353/mmu:12389/mmu:14991/mmu:14360/mmu:12524/mmu:12370/mmu:24051/mmu:12367/mmu:19354/mmu:15015/mmu:14960/mmu:15894/mmu:13138/mmu:15039/mmu:110558/mmu:14969/mmu:14972/mmu:15040/mmu:12443/mmu:110557/mmu:14964/mmu:14961	23
KEGG	mmu04512	ECM-receptor interaction	27/1155	84/6959	0.000317874	0.00303967	ENSMUSG00000001119/ENSMUSG00000001507/ENSMUSG00000001930/ENSMUSG00000005087/ENSMUSG00000015533/ENSMUSG00000015647/ENSMUSG00000015829/ENSMUSG00000020241/ENSMUSG00000020758/ENSMUSG00000021702/ENSMUSG00000022483/ENSMUSG00000025321/ENSMUSG00000026193/ENSMUSG00000027009/ENSMUSG00000027087/ENSMUSG00000031502/ENSMUSG00000033327/ENSMUSG00000034664/ENSMUSG00000034687/ENSMUSG00000039115/ENSMUSG00000039952/…	Col6a1/Itga3/Vwf/Cd44/Itga2/Lama5/Tnr/Col6a2/Itgb4/Thbs4/Col2a1/Itgb8/Fn1/Itga4/Itgav/Col4a1/Tnxb/Itga2b/Fras1/Itga9/Dag1/Thbs1/Agrn/Reln/Lamb2/Cd47/Frem1	mmu:12833/mmu:16400/mmu:22371/mmu:12505/mmu:16398/mmu:16776/mmu:21960/mmu:12834/mmu:192897/mmu:21828/mmu:12824/mmu:320910/mmu:14268/mmu:16401/mmu:16410/mmu:12826/mmu:81877/mmu:16399/mmu:231470/mmu:104099/mmu:13138/mmu:21825/mmu:11603/mmu:19699/mmu:16779/mmu:16423/mmu:329872	27
KEGG	mmu04014	Ras signaling pathway	57/1155	223/6959	0.000354902	0.00323067	ENSMUSG00000000120/ENSMUSG00000001847/ENSMUSG00000002489/ENSMUSG00000004056/ENSMUSG00000004451/ENSMUSG00000004508/ENSMUSG00000004791/ENSMUSG00000004952/ENSMUSG00000005320/ENSMUSG00000006445/ENSMUSG00000006699/ENSMUSG00000009376/ENSMUSG00000014599/ENSMUSG00000016933/ENSMUSG00000018334/ENSMUSG00000020122/ENSMUSG00000020312/ENSMUSG00000020828/ENSMUSG00000021448/ENSMUSG00000022895/ENSMUSG00000023439/…	Ngfr/Rac1/Tiam1/Akt2/Ralb/Gab2/Pgf/Rasa4/Fgfr4/Epha2/Cdc42/Met/Csf1/Plcg1/Ksr1/Egfr/Shc2/Pld2/Shc3/Ets2/Gnb3/Vegfa/Csf1r/Rela/Plce1/Rgl1/Ralgds/Grin1/Rasgrp1/Efna1/Ntrk1/Nfkb1/Flt1/Gnb2/Tgfa/Rasa3/Fgfr1/Gab1/Ets1/Rasa2/Mras/Rac2/Plcg2/Gng12/Fgf2/Rras/Flt3/Mapk10/Igf2/Rasal3/Prkcb/Ntrk2/Rras2/Kdr/Mapk3/Rasal2/Rasgrp3	mmu:18053/mmu:19353/mmu:21844/mmu:11652/mmu:64143/mmu:14389/mmu:18654/mmu:54153/mmu:14186/mmu:13836/mmu:12540/mmu:17295/mmu:12977/mmu:18803/mmu:16706/mmu:13649/mmu:216148/mmu:18806/mmu:20418/mmu:23872/mmu:14695/mmu:22339/mmu:12978/mmu:19697/mmu:74055/mmu:19731/mmu:19730/mmu:14810/mmu:19419/mmu:13636/mmu:18211/mmu:18033/mmu:14254/mmu:14693/mmu:21802/mmu:19414/mmu:14182/mmu:14388/mmu:23871/mmu:1147…	57
KEGG	mmu05412	Arrhythmogenic right ventricular cardiomyopathy (ARVC)	24/1155	72/6959	0.000368344	0.00323067	ENSMUSG00000001507/ENSMUSG00000003352/ENSMUSG00000010066/ENSMUSG00000015533/ENSMUSG00000015968/ENSMUSG00000017412/ENSMUSG00000020723/ENSMUSG00000020758/ENSMUSG00000021313/ENSMUSG00000024304/ENSMUSG00000025321/ENSMUSG00000027009/ENSMUSG00000027087/ENSMUSG00000028063/ENSMUSG00000029156/ENSMUSG00000034664/ENSMUSG00000039115/ENSMUSG00000039952/ENSMUSG00000040373/ENSMUSG00000051331/ENSMUSG00000054640/…	Itga3/Cacnb3/Cacna2d2/Itga2/Cacna1d/Cacnb4/Cacng4/Itgb4/Ryr2/Cdh2/Itgb8/Itga4/Itgav/Lmna/Sgcb/Itga2b/Itga9/Dag1/Cacng5/Cacna1c/Slc8a1/Dsp/Tcf7l1/Ctnna2	mmu:16400/mmu:12297/mmu:56808/mmu:16398/mmu:12289/mmu:12298/mmu:54377/mmu:192897/mmu:20191/mmu:12558/mmu:320910/mmu:16401/mmu:16410/mmu:16905/mmu:24051/mmu:16399/mmu:104099/mmu:13138/mmu:140723/mmu:12288/mmu:20541/mmu:109620/mmu:21415/mmu:12386	24
KEGG	mmu04727	GABAergic synapse	28/1155	89/6959	0.000369521	0.00323067	ENSMUSG00000000001/ENSMUSG00000004113/ENSMUSG00000006930/ENSMUSG00000007653/ENSMUSG00000010803/ENSMUSG00000015968/ENSMUSG00000018567/ENSMUSG00000020436/ENSMUSG00000020654/ENSMUSG00000022462/ENSMUSG00000023439/ENSMUSG00000027646/ENSMUSG00000029713/ENSMUSG00000030109/ENSMUSG00000030307/ENSMUSG00000030310/ENSMUSG00000031748/ENSMUSG00000032562/ENSMUSG00000033676/ENSMUSG00000034656/ENSMUSG00000036402/…	Gnai3/Cacna1b/Hap1/Gabrb2/Gabra1/Cacna1d/Gabarap/Gabrg2/Adcy3/Slc38a2/Gnb3/Src/Gnb2/Slc6a12/Slc6a11/Slc6a1/Gnao1/Gnai2/Gabrb3/Cacna1a/Gng12/Plcl1/Gabbr2/Cacna1c/Prkcb/Gnai1/Abat/Gabrr3	mmu:14679/mmu:12287/mmu:15114/mmu:14401/mmu:14394/mmu:12289/mmu:56486/mmu:14406/mmu:104111/mmu:67760/mmu:14695/mmu:20779/mmu:14693/mmu:14411/mmu:243616/mmu:232333/mmu:14681/mmu:14678/mmu:14402/mmu:12286/mmu:14701/mmu:227120/mmu:242425/mmu:12288/mmu:18751/mmu:14677/mmu:268860/mmu:328699	28
KEGG	mmu04392	Hippo signaling pathway - multiple species	12/1155	26/6959	0.000407647	0.003465	ENSMUSG00000002249/ENSMUSG00000009073/ENSMUSG00000021959/ENSMUSG00000022178/ENSMUSG00000025239/ENSMUSG00000027339/ENSMUSG00000027803/ENSMUSG00000030796/ENSMUSG00000036459/ENSMUSG00000036862/ENSMUSG00000042129/ENSMUSG00000053110	Tead3/Nf2/Lats2/Ajuba/Limd1/Rassf2/Wwtr1/Tead2/Wtip/Dchs1/Rassf4/Yap1	mmu:21678/mmu:18016/mmu:50523/mmu:16475/mmu:29806/mmu:215653/mmu:97064/mmu:21677/mmu:101543/mmu:233651/mmu:213391/mmu:22601	12
KEGG	mmu05418	Fluid shear stress and atherosclerosis	39/1155	139/6959	0.000427312	0.00353398	ENSMUSG00000001034/ENSMUSG00000001663/ENSMUSG00000001847/ENSMUSG00000003849/ENSMUSG00000004056/ENSMUSG00000005413/ENSMUSG00000006519/ENSMUSG00000007655/ENSMUSG00000015837/ENSMUSG00000015839/ENSMUSG00000015950/ENSMUSG00000021835/ENSMUSG00000023951/ENSMUSG00000024927/ENSMUSG00000026072/ENSMUSG00000026480/ENSMUSG00000026836/ENSMUSG00000027087/ENSMUSG00000027646/ENSMUSG00000027890/ENSMUSG00000027962/…	Mapk7/Gstt1/Rac1/Nqo1/Akt2/Hmox1/Cyba/Cav1/Sqstm1/Nfe2l2/Ncf1/Bmp4/Vegfa/Rela/Il1r1/Ncf2/Acvr1/Itgav/Src/Gstm4/Vcam1/Arhgef2/Nfkb1/Tnfrsf1a/Plat/Gsta4/Rac2/Gpc1/Itga2b/Ccl12/Icam1/Mapk10/Bmpr1b/Jun/Gstm1/Acvr2b/Kdr/Map3k5/Gsta1	mmu:23939/mmu:14871/mmu:19353/mmu:18104/mmu:11652/mmu:15368/mmu:13057/mmu:12389/mmu:18412/mmu:18024/mmu:17969/mmu:12159/mmu:22339/mmu:19697/mmu:16177/mmu:17970/mmu:11477/mmu:16410/mmu:20779/mmu:14865/mmu:22329/mmu:16800/mmu:18033/mmu:21937/mmu:18791/mmu:14860/mmu:19354/mmu:14733/mmu:16399/mmu:20293/mmu:15894/mmu:26414/mmu:12167/mmu:16476/mmu:14862/mmu:11481/mmu:16542/mmu:26408/mmu:14857	39
KEGG	mmu05165	Human papillomavirus infection	77/1155	325/6959	0.000475369	0.00382797	ENSMUSG00000000126/ENSMUSG00000000881/ENSMUSG00000001119/ENSMUSG00000001507/ENSMUSG00000001750/ENSMUSG00000001930/ENSMUSG00000002325/ENSMUSG00000004056/ENSMUSG00000006699/ENSMUSG00000007989/ENSMUSG00000015533/ENSMUSG00000015647/ENSMUSG00000015829/ENSMUSG00000016206/ENSMUSG00000018899/ENSMUSG00000019302/ENSMUSG00000019789/ENSMUSG00000020122/ENSMUSG00000020135/ENSMUSG00000020241/ENSMUSG00000020733/…	Wnt9a/Dlg3/Col6a1/Itga3/Tcirg1/Vwf/Irf9/Akt2/Cdc42/Fzd3/Itga2/Lama5/Tnr/H2-M3/Irf1/Atp6v0a1/Hey2/Egfr/Apc2/Col6a2/Slc9a3r1/Itgb4/Thbs4/Col2a1/Ifnar2/Mx2/Vegfa/Eif2ak2/Atp6v1g2/Fas/Rela/Itgb8/Casp8/Stat1/Fn1/Notch1/Itga4/Itgav/Notch2/Nfkb1/Hdac1/Oasl2/Lfng/Tnfrsf1a/Col4a1/Casp3/Tlr3/Tradd/Maml2/Tyk2/Tnxb/Ccnd3/Itga2b/Isg15/H2-Q4/Atp6v0a2/Creb3l2/Itga9/Stat2/Thbs1/Fzd7/Oasl1/Reln/Crb3/Dlg2/Lamb2/Tc…	mmu:216795/mmu:53310/mmu:12833/mmu:16400/mmu:27060/mmu:22371/mmu:16391/mmu:11652/mmu:12540/mmu:14365/mmu:16398/mmu:16776/mmu:21960/mmu:14991/mmu:16362/mmu:11975/mmu:15214/mmu:13649/mmu:23805/mmu:12834/mmu:26941/mmu:192897/mmu:21828/mmu:12824/mmu:15976/mmu:17858/mmu:22339/mmu:19106/mmu:66237/mmu:14102/mmu:19697/mmu:320910/mmu:12370/mmu:20846/mmu:14268/mmu:18128/mmu:16401/mmu:16410/mmu:18129/mmu:18…	77
KEGG	mmu04217	Necroptosis	39/1155	141/6959	0.000582993	0.00457426	ENSMUSG00000002147/ENSMUSG00000002325/ENSMUSG00000004040/ENSMUSG00000015340/ENSMUSG00000015837/ENSMUSG00000020086/ENSMUSG00000020919/ENSMUSG00000021820/ENSMUSG00000022965/ENSMUSG00000022971/ENSMUSG00000023249/ENSMUSG00000024079/ENSMUSG00000024778/ENSMUSG00000024810/ENSMUSG00000025888/ENSMUSG00000026029/ENSMUSG00000026031/ENSMUSG00000026104/ENSMUSG00000026496/ENSMUSG00000026509/ENSMUSG00000026637/…	Stat6/Irf9/Stat3/Cybb/Sqstm1/H2afy2/Stat5b/Camk2g/Ifngr2/Ifnar2/Parp3/Eif2ak2/Fas/Il33/Casp1/Casp8/Cflar/Stat1/Parp1/Capn2/Traf5/Zbp1/Tnfrsf1a/2610002M06Rik/Tlr3/Jak3/Tradd/Birc3/Tyk2/Pygm/Tlr4/Stat2/Mapk10/Rnf31/Ftl1/Parp4/Camk2b/Hmgb1/Ppia	mmu:20852/mmu:16391/mmu:20848/mmu:13058/mmu:18412/mmu:404634/mmu:20851/mmu:12325/mmu:15980/mmu:15976/mmu:235587/mmu:19106/mmu:14102/mmu:77125/mmu:12362/mmu:12370/mmu:12633/mmu:20846/mmu:11545/mmu:12334/mmu:22033/mmu:58203/mmu:21937/mmu:67028/mmu:142980/mmu:16453/mmu:71609/mmu:11796/mmu:54721/mmu:19309/mmu:21898/mmu:20847/mmu:26414/mmu:268749/mmu:14325/mmu:328417/mmu:12323/mmu:100862258/mmu:268373	39
KEGG	mmu04713	Circadian entrainment	29/1155	96/6959	0.000621706	0.00475605	ENSMUSG00000000001/ENSMUSG00000001986/ENSMUSG00000015968/ENSMUSG00000020524/ENSMUSG00000020654/ENSMUSG00000020866/ENSMUSG00000021313/ENSMUSG00000021820/ENSMUSG00000023439/ENSMUSG00000024112/ENSMUSG00000025892/ENSMUSG00000026959/ENSMUSG00000028005/ENSMUSG00000029713/ENSMUSG00000030102/ENSMUSG00000031748/ENSMUSG00000032562/ENSMUSG00000033910/ENSMUSG00000033981/ENSMUSG00000036402/ENSMUSG00000038026/…	Gnai3/Gria3/Cacna1d/Gria1/Adcy3/Cacna1g/Ryr2/Camk2g/Gnb3/Cacna1h/Gria4/Grin1/Gucy1b3/Gnb2/Itpr1/Gnao1/Gnai2/Gucy1a3/Gria2/Gng12/Kcnj9/Nos1ap/Plcb4/Cacna1c/Prkcb/Prkg1/Gnai1/Camk2b/Mapk3	mmu:14679/mmu:53623/mmu:12289/mmu:14799/mmu:104111/mmu:12291/mmu:20191/mmu:12325/mmu:14695/mmu:58226/mmu:14802/mmu:14810/mmu:54195/mmu:14693/mmu:16438/mmu:14681/mmu:14678/mmu:60596/mmu:14800/mmu:14701/mmu:16524/mmu:70729/mmu:18798/mmu:12288/mmu:18751/mmu:19091/mmu:14677/mmu:12323/mmu:26417	29
KEGG	mmu04142	Lysosome	34/1155	119/6959	0.000684575	0.00510927	ENSMUSG00000000594/ENSMUSG00000001750/ENSMUSG00000004207/ENSMUSG00000005142/ENSMUSG00000007891/ENSMUSG00000015027/ENSMUSG00000016256/ENSMUSG00000016534/ENSMUSG00000018774/ENSMUSG00000019302/ENSMUSG00000020585/ENSMUSG00000021665/ENSMUSG00000021686/ENSMUSG00000022453/ENSMUSG00000022500/ENSMUSG00000022620/ENSMUSG00000024781/ENSMUSG00000025351/ENSMUSG00000025534/ENSMUSG00000028015/ENSMUSG00000028164/…	Gm2a/Tcirg1/Psap/Man2b1/Ctsd/Galns/Ctsz/Lamp2/Cd68/Atp6v0a1/Laptm4a/Hexb/Ap3b1/Naga/Litaf/Arsa/Lipa/Cd63/Gusb/Ctso/Manba/Laptm5/Fuca1/Scarb2/Ctsc/Ap1s2/Pla2g15/Ctsh/Idua/Atp6v0a2/Ctss/Arsb/Glb1/Cltb	mmu:14667/mmu:27060/mmu:19156/mmu:17159/mmu:13033/mmu:50917/mmu:64138/mmu:16784/mmu:12514/mmu:11975/mmu:17775/mmu:15212/mmu:11774/mmu:17939/mmu:56722/mmu:11883/mmu:16889/mmu:12512/mmu:110006/mmu:229445/mmu:110173/mmu:16792/mmu:71665/mmu:12492/mmu:13032/mmu:108012/mmu:192654/mmu:13036/mmu:15932/mmu:21871/mmu:13040/mmu:11881/mmu:12091/mmu:74325	34
KEGG	mmu04015	Rap1 signaling pathway	51/1155	200/6959	0.000756265	0.00550993	ENSMUSG00000000001/ENSMUSG00000000120/ENSMUSG00000000290/ENSMUSG00000001847/ENSMUSG00000002489/ENSMUSG00000002699/ENSMUSG00000004056/ENSMUSG00000004451/ENSMUSG00000004791/ENSMUSG00000005320/ENSMUSG00000006445/ENSMUSG00000006699/ENSMUSG00000009376/ENSMUSG00000014599/ENSMUSG00000016933/ENSMUSG00000020122/ENSMUSG00000020654/ENSMUSG00000022148/ENSMUSG00000023951/ENSMUSG00000024621/ENSMUSG00000024998/…	Gnai3/Ngfr/Itgb2/Rac1/Tiam1/Lcp2/Akt2/Ralb/Pgf/Fgfr4/Epha2/Cdc42/Met/Csf1/Plcg1/Egfr/Adcy3/Fyb/Vegfa/Csf1r/Plce1/Apbb1ip/Ralgds/Grin1/Src/Pfn2/Efna1/Flt1/Vasp/Itgam/Fgfr1/Gnao1/Mras/Gnai2/Rac2/Itga2b/Dock4/Fgf2/Rras/Plcb4/Magi2/Thbs1/Rap1gap/Sipa1l1/Magi3/Prkcb/Gnai1/Kdr/Mapk3/Lpar5/Rasgrp3	mmu:14679/mmu:18053/mmu:16414/mmu:19353/mmu:21844/mmu:16822/mmu:11652/mmu:64143/mmu:18654/mmu:14186/mmu:13836/mmu:12540/mmu:17295/mmu:12977/mmu:18803/mmu:13649/mmu:104111/mmu:23880/mmu:22339/mmu:12978/mmu:74055/mmu:54519/mmu:19730/mmu:14810/mmu:20779/mmu:18645/mmu:13636/mmu:14254/mmu:22323/mmu:16409/mmu:14182/mmu:14681/mmu:17532/mmu:14678/mmu:19354/mmu:16399/mmu:238130/mmu:14173/mmu:20130/mmu:187…	51
KEGG	mmu04810	Regulation of actin cytoskeleton	53/1155	210/6959	0.000779974	0.00555052	ENSMUSG00000000290/ENSMUSG00000001507/ENSMUSG00000001847/ENSMUSG00000002489/ENSMUSG00000005320/ENSMUSG00000006699/ENSMUSG00000015533/ENSMUSG00000020122/ENSMUSG00000020135/ENSMUSG00000020580/ENSMUSG00000020758/ENSMUSG00000022443/ENSMUSG00000022488/ENSMUSG00000024867/ENSMUSG00000025321/ENSMUSG00000026193/ENSMUSG00000027002/ENSMUSG00000027009/ENSMUSG00000027087/ENSMUSG00000027646/ENSMUSG00000027805/…	Itgb2/Itga3/Rac1/Tiam1/Fgfr4/Cdc42/Itga2/Egfr/Apc2/Rock2/Itgb4/Myh9/Nckap1l/Pip5k1b/Itgb8/Fn1/Nckap1/Itga4/Itgav/Src/Pfn2/Slc9a1/Arpc3/Arpc1b/Cyfip1/Myh14/Itgam/Itgax/Arhgef6/Was/Msn/Fgfr1/Mras/Chrm1/Rac2/Vav3/Vav1/Diap2/Ssh3/Itga2b/Pip5k1c/Gng12/Fgf2/Arhgef4/Rras/Itga9/Chrm3/Tmsb4x/Rras2/Cfl1/Dock1/Mapk3/Lpar5	mmu:16414/mmu:16400/mmu:19353/mmu:21844/mmu:14186/mmu:12540/mmu:16398/mmu:13649/mmu:23805/mmu:19878/mmu:192897/mmu:17886/mmu:105855/mmu:18719/mmu:320910/mmu:14268/mmu:50884/mmu:16401/mmu:16410/mmu:20779/mmu:18645/mmu:20544/mmu:56378/mmu:11867/mmu:20430/mmu:71960/mmu:16409/mmu:16411/mmu:73341/mmu:22376/mmu:17698/mmu:14182/mmu:17532/mmu:12669/mmu:19354/mmu:57257/mmu:22324/mmu:54004/mmu:245857/mmu:1…	53
KEGG	mmu04620	Toll-like receptor signaling pathway	26/1155	85/6959	0.000949385	0.00660254	ENSMUSG00000000982/ENSMUSG00000001847/ENSMUSG00000004056/ENSMUSG00000022901/ENSMUSG00000022971/ENSMUSG00000024235/ENSMUSG00000024927/ENSMUSG00000025498/ENSMUSG00000025779/ENSMUSG00000026029/ENSMUSG00000026104/ENSMUSG00000027995/ENSMUSG00000028163/ENSMUSG00000029771/ENSMUSG00000031392/ENSMUSG00000031639/ENSMUSG00000032041/ENSMUSG00000032508/ENSMUSG00000034855/ENSMUSG00000039005/ENSMUSG00000044583/…	Ccl3/Rac1/Akt2/Cd86/Ifnar2/Map3k8/Rela/Irf7/Ly96/Casp8/Stat1/Tlr2/Nfkb1/Irf5/Irak1/Tlr3/Tirap/Myd88/Cxcl10/Tlr4/Tlr7/Mapk10/Cd14/Jun/Irak4/Mapk3	mmu:20302/mmu:19353/mmu:11652/mmu:12524/mmu:15976/mmu:26410/mmu:19697/mmu:54123/mmu:17087/mmu:12370/mmu:20846/mmu:24088/mmu:18033/mmu:27056/mmu:16179/mmu:142980/mmu:117149/mmu:17874/mmu:15945/mmu:21898/mmu:170743/mmu:26414/mmu:12475/mmu:16476/mmu:266632/mmu:26417	26
KEGG	mmu04630	JAK-STAT signaling pathway	38/1155	140/6959	0.00100772	0.00685246	ENSMUSG00000002147/ENSMUSG00000002325/ENSMUSG00000004040/ENSMUSG00000004056/ENSMUSG00000004266/ENSMUSG00000017057/ENSMUSG00000020027/ENSMUSG00000020122/ENSMUSG00000020919/ENSMUSG00000020932/ENSMUSG00000021756/ENSMUSG00000022146/ENSMUSG00000022965/ENSMUSG00000022969/ENSMUSG00000022971/ENSMUSG00000023092/ENSMUSG00000023206/ENSMUSG00000024014/ENSMUSG00000026104/ENSMUSG00000027718/ENSMUSG00000027947/…	Stat6/Irf9/Stat3/Akt2/Ptpn6/Il13ra1/Socs2/Egfr/Stat5b/Gfap/Il6st/Osmr/Ifngr2/Il10rb/Ifnar2/Fhl1/Il15ra/Pim1/Stat1/Il21/Il6ra/Csf3r/Il4ra/Jak3/Il10ra/Tyk2/Crlf2/Ccnd3/Lif/Mcl1/Stat2/Socs3/Csf2ra/Ifnlr1/Aox1/Il3ra/Ccnd1/Csf2rb	mmu:20852/mmu:16391/mmu:20848/mmu:11652/mmu:15170/mmu:16164/mmu:216233/mmu:13649/mmu:20851/mmu:14580/mmu:16195/mmu:18414/mmu:15980/mmu:16155/mmu:15976/mmu:14199/mmu:16169/mmu:18712/mmu:20846/mmu:60505/mmu:16194/mmu:12986/mmu:16190/mmu:16453/mmu:16154/mmu:54721/mmu:57914/mmu:12445/mmu:16878/mmu:17210/mmu:20847/mmu:12702/mmu:12982/mmu:242700/mmu:11761/mmu:16188/mmu:12443/mmu:12983	38
KEGG	mmu04060	Cytokine-cytokine receptor interaction	58/1155	238/6959	0.00113748	0.00742311	ENSMUSG00000000120/ENSMUSG00000000982/ENSMUSG00000002897/ENSMUSG00000010142/ENSMUSG00000014599/ENSMUSG00000017057/ENSMUSG00000018927/ENSMUSG00000019122/ENSMUSG00000021508/ENSMUSG00000021756/ENSMUSG00000021835/ENSMUSG00000022146/ENSMUSG00000022965/ENSMUSG00000022969/ENSMUSG00000022971/ENSMUSG00000023206/ENSMUSG00000023905/ENSMUSG00000023915/ENSMUSG00000024621/ENSMUSG00000024778/ENSMUSG00000024810/…	Ngfr/Ccl3/Il17ra/Tnfrsf13b/Csf1/Il13ra1/Ccl6/Ccl9/Cxcl14/Il6st/Bmp4/Osmr/Ifngr2/Il10rb/Ifnar2/Il15ra/Tnfrsf12a/Tnfrsf21/Csf1r/Fas/Il33/Gdf11/Il1r1/Acvr1/Il21/Il6ra/Tnfrsf1b/Tnfrsf8/Csf3r/Gdf3/Ltbr/Tnfrsf1a/Il4ra/Il34/Cx3cl1/Il10ra/Tgfbr2/Inha/Crlf2/Lif/Eda2r/Cxcl10/Ccl12/Tnfsf9/Inhbb/Tgfb2/Clcf1/Tnfrsf14/Il17re/Gdf6/Cx3cr1/Bmpr1b/Csf2ra/Acvr2b/Ifnlr1/Il3ra/Csf2rb/Ccr5	mmu:18053/mmu:20302/mmu:16172/mmu:57916/mmu:12977/mmu:16164/mmu:20305/mmu:20308/mmu:57266/mmu:16195/mmu:12159/mmu:18414/mmu:15980/mmu:16155/mmu:15976/mmu:16169/mmu:27279/mmu:94185/mmu:12978/mmu:14102/mmu:77125/mmu:14561/mmu:16177/mmu:11477/mmu:60505/mmu:16194/mmu:21938/mmu:21941/mmu:12986/mmu:14562/mmu:17000/mmu:21937/mmu:16190/mmu:76527/mmu:20312/mmu:16154/mmu:21813/mmu:16322/mmu:57914/mmu:16878…	58
KEGG	mmu04658	Th1 and Th2 cell differentiation	26/1155	86/6959	0.00115065	0.00742311	ENSMUSG00000000409/ENSMUSG00000002147/ENSMUSG00000002799/ENSMUSG00000014773/ENSMUSG00000016933/ENSMUSG00000020919/ENSMUSG00000022965/ENSMUSG00000023947/ENSMUSG00000024927/ENSMUSG00000026104/ENSMUSG00000026923/ENSMUSG00000027544/ENSMUSG00000027878/ENSMUSG00000028163/ENSMUSG00000030748/ENSMUSG00000031805/ENSMUSG00000031925/ENSMUSG00000032175/ENSMUSG00000033016/ENSMUSG00000036594/ENSMUSG00000046709/…	Lck/Stat6/Jag2/Dll1/Plcg1/Stat5b/Ifngr2/Nfkbie/Rela/Stat1/Notch1/Nfatc2/Notch2/Nfkb1/Il4ra/Jak3/Maml2/Tyk2/Nfatc1/H2-Aa/Mapk10/Jun/H2-Eb1/Maml3/Mapk3/H2-Ab1	mmu:16818/mmu:20852/mmu:16450/mmu:13388/mmu:18803/mmu:20851/mmu:15980/mmu:18037/mmu:19697/mmu:20846/mmu:18128/mmu:18019/mmu:18129/mmu:18033/mmu:16190/mmu:16453/mmu:270118/mmu:54721/mmu:18018/mmu:14960/mmu:26414/mmu:16476/mmu:14969/mmu:433586/mmu:26417/mmu:14961	26
KEGG	mmu04072	Phospholipase D signaling pathway	38/1155	141/6959	0.00116441	0.00742311	ENSMUSG00000000617/ENSMUSG00000004056/ENSMUSG00000004451/ENSMUSG00000004508/ENSMUSG00000004815/ENSMUSG00000016933/ENSMUSG00000018001/ENSMUSG00000018008/ENSMUSG00000019843/ENSMUSG00000020122/ENSMUSG00000020312/ENSMUSG00000020573/ENSMUSG00000020654/ENSMUSG00000020828/ENSMUSG00000020901/ENSMUSG00000021448/ENSMUSG00000021457/ENSMUSG00000023827/ENSMUSG00000024867/ENSMUSG00000026821/ENSMUSG00000028036/…	Grm6/Akt2/Ralb/Gab2/Dgkq/Plcg1/Cyth3/Cyth4/Fyn/Egfr/Shc2/Pik3cg/Adcy3/Pld2/Pik3r5/Shc3/Syk/Agpat4/Pip5k1b/Ralgds/Ptgfr/Ppap2b/Gab1/Agt/Mras/Plcg2/Dgkh/Pip5k1c/Rras/Dgki/Plcb4/Dgkz/Rras2/Grm7/Fcer1g/Mapk3/Lpar5/Dgkd	mmu:108072/mmu:11652/mmu:64143/mmu:14389/mmu:110524/mmu:18803/mmu:19159/mmu:72318/mmu:14360/mmu:13649/mmu:216148/mmu:30955/mmu:104111/mmu:18806/mmu:320207/mmu:20418/mmu:20963/mmu:68262/mmu:18719/mmu:19730/mmu:19220/mmu:67916/mmu:14388/mmu:11606/mmu:17532/mmu:234779/mmu:380921/mmu:18717/mmu:20130/mmu:320127/mmu:18798/mmu:104418/mmu:66922/mmu:108073/mmu:14127/mmu:26417/mmu:381810/mmu:227333	38
KEGG	mmu04659	Th17 cell differentiation	29/1155	100/6959	0.00127937	0.00798952	ENSMUSG00000000409/ENSMUSG00000002147/ENSMUSG00000004040/ENSMUSG00000016933/ENSMUSG00000019256/ENSMUSG00000020919/ENSMUSG00000021756/ENSMUSG00000022952/ENSMUSG00000022965/ENSMUSG00000023947/ENSMUSG00000024927/ENSMUSG00000026072/ENSMUSG00000026104/ENSMUSG00000027544/ENSMUSG00000027718/ENSMUSG00000027947/ENSMUSG00000028163/ENSMUSG00000030748/ENSMUSG00000031805/ENSMUSG00000032175/ENSMUSG00000032402/…	Lck/Stat6/Stat3/Plcg1/Ahr/Stat5b/Il6st/Runx1/Ifngr2/Nfkbie/Rela/Il1r1/Stat1/Nfatc2/Il21/Il6ra/Nfkb1/Il4ra/Jak3/Tyk2/Smad3/Tgfbr2/Nfatc1/H2-Aa/Mapk10/Jun/H2-Eb1/Mapk3/H2-Ab1	mmu:16818/mmu:20852/mmu:20848/mmu:18803/mmu:11622/mmu:20851/mmu:16195/mmu:12394/mmu:15980/mmu:18037/mmu:19697/mmu:16177/mmu:20846/mmu:18019/mmu:60505/mmu:16194/mmu:18033/mmu:16190/mmu:16453/mmu:54721/mmu:17127/mmu:21813/mmu:18018/mmu:14960/mmu:26414/mmu:16476/mmu:14969/mmu:26417/mmu:14961	29
KEGG	mmu04024	cAMP signaling pathway	51/1155	205/6959	0.00137034	0.0083865	ENSMUSG00000000001/ENSMUSG00000000567/ENSMUSG00000001847/ENSMUSG00000001986/ENSMUSG00000002489/ENSMUSG00000004056/ENSMUSG00000015968/ENSMUSG00000019943/ENSMUSG00000020524/ENSMUSG00000020580/ENSMUSG00000020654/ENSMUSG00000020828/ENSMUSG00000021313/ENSMUSG00000021318/ENSMUSG00000021478/ENSMUSG00000021820/ENSMUSG00000024927/ENSMUSG00000024998/ENSMUSG00000025892/ENSMUSG00000026463/ENSMUSG00000026959/…	Gnai3/Sox9/Rac1/Gria3/Tiam1/Akt2/Cacna1d/Atp2b1/Gria1/Rock2/Adcy3/Pld2/Ryr2/Gli3/Drd1a/Camk2g/Rela/Plce1/Gria4/Atp2b4/Grin1/Nfkb1/Pde4b/Edn2/Slc9a1/Atp2b2/Pde3b/Gnai2/Chrm1/Abcc4/Nfatc1/Atp1a1/Rac2/Vav3/Gria2/Vav1/Fxyd1/Rras/Creb3l2/Gabbr2/Pde3a/Adora1/Mapk10/Orai1/Cacna1c/Jun/Rras2/Gnai1/Camk2b/Ppp1r1b/Mapk3	mmu:14679/mmu:20682/mmu:19353/mmu:53623/mmu:21844/mmu:11652/mmu:12289/mmu:67972/mmu:14799/mmu:19878/mmu:104111/mmu:18806/mmu:20191/mmu:14634/mmu:13488/mmu:12325/mmu:19697/mmu:74055/mmu:14802/mmu:381290/mmu:14810/mmu:18033/mmu:18578/mmu:13615/mmu:20544/mmu:11941/mmu:18576/mmu:14678/mmu:12669/mmu:239273/mmu:18018/mmu:11928/mmu:19354/mmu:57257/mmu:14800/mmu:22324/mmu:56188/mmu:20130/mmu:208647/mmu:2…	51
KEGG	mmu05163	Human cytomegalovirus infection	54/1155	221/6959	0.00155905	0.00935429	ENSMUSG00000000001/ENSMUSG00000000982/ENSMUSG00000001847/ENSMUSG00000004040/ENSMUSG00000004056/ENSMUSG00000016206/ENSMUSG00000020122/ENSMUSG00000020580/ENSMUSG00000020654/ENSMUSG00000022969/ENSMUSG00000023439/ENSMUSG00000023951/ENSMUSG00000024308/ENSMUSG00000024339/ENSMUSG00000024349/ENSMUSG00000024778/ENSMUSG00000024927/ENSMUSG00000026029/ENSMUSG00000026072/ENSMUSG00000026637/ENSMUSG00000027087/…	Gnai3/Ccl3/Rac1/Stat3/Akt2/H2-M3/Egfr/Rock2/Adcy3/Il10rb/Gnb3/Vegfa/Tapbp/Tap2/Tmem173/Fas/Rela/Casp8/Il1r1/Traf5/Itgav/Nfatc2/Src/Il6ra/Nfkb1/Gnb2/Itpr1/Tnfrsf1a/Casp3/Gnao1/Cx3cl1/Tradd/Il10ra/Gnai2/Nfatc1/Rac2/Ccl12/H2-Q4/Gng12/Tap1/Creb3l2/Plcb4/Prkcb/H2-T22/Gnai1/H2-Q7/B2m/H2-K1/Mapk3/H2-T23/Ccnd1/H2-Q6/H2-D1/Ccr5	mmu:14679/mmu:20302/mmu:19353/mmu:20848/mmu:11652/mmu:14991/mmu:13649/mmu:19878/mmu:104111/mmu:16155/mmu:14695/mmu:22339/mmu:21356/mmu:21355/mmu:72512/mmu:14102/mmu:19697/mmu:12370/mmu:16177/mmu:22033/mmu:16410/mmu:18019/mmu:20779/mmu:16194/mmu:18033/mmu:14693/mmu:16438/mmu:21937/mmu:12367/mmu:14681/mmu:20312/mmu:71609/mmu:16154/mmu:14678/mmu:18018/mmu:19354/mmu:20293/mmu:15015/mmu:14701/mmu:2135…	54
KEGG	mmu05212	Pancreatic cancer	23/1155	75/6959	0.00176044	0.0103595	ENSMUSG00000001847/ENSMUSG00000004040/ENSMUSG00000004056/ENSMUSG00000004451/ENSMUSG00000006699/ENSMUSG00000015312/ENSMUSG00000020122/ENSMUSG00000021453/ENSMUSG00000023951/ENSMUSG00000024927/ENSMUSG00000026104/ENSMUSG00000026821/ENSMUSG00000028163/ENSMUSG00000029999/ENSMUSG00000031133/ENSMUSG00000032402/ENSMUSG00000032440/ENSMUSG00000033220/ENSMUSG00000039239/ENSMUSG00000046709/ENSMUSG00000062312/…	Rac1/Stat3/Akt2/Ralb/Cdc42/Gadd45b/Egfr/Gadd45g/Vegfa/Rela/Stat1/Ralgds/Nfkb1/Tgfa/Arhgef6/Smad3/Tgfbr2/Rac2/Tgfb2/Mapk10/Erbb2/Mapk3/Ccnd1	mmu:19353/mmu:20848/mmu:11652/mmu:64143/mmu:12540/mmu:17873/mmu:13649/mmu:23882/mmu:22339/mmu:19697/mmu:20846/mmu:19730/mmu:18033/mmu:21802/mmu:73341/mmu:17127/mmu:21813/mmu:19354/mmu:21808/mmu:26414/mmu:13866/mmu:26417/mmu:12443	23
KEGG	mmu05100	Bacterial invasion of epithelial cells	22/1155	71/6959	0.00189538	0.0109432	ENSMUSG00000001847/ENSMUSG00000006699/ENSMUSG00000007655/ENSMUSG00000009376/ENSMUSG00000018398/ENSMUSG00000020312/ENSMUSG00000021448/ENSMUSG00000022456/ENSMUSG00000026193/ENSMUSG00000027646/ENSMUSG00000029465/ENSMUSG00000029622/ENSMUSG00000031078/ENSMUSG00000031165/ENSMUSG00000031714/ENSMUSG00000041112/ENSMUSG00000047547/ENSMUSG00000050379/ENSMUSG00000058013/ENSMUSG00000058325/ENSMUSG00000059248/…	Rac1/Cdc42/Cav1/Met/Sept8/Shc2/Shc3/Sept3/Fn1/Src/Arpc3/Arpc1b/Cttn/Was/Gab1/Elmo1/Cltb/Sept6/Sept11/Dock1/Sept9/Ctnna2	mmu:19353/mmu:12540/mmu:12389/mmu:17295/mmu:20362/mmu:216148/mmu:20418/mmu:24050/mmu:14268/mmu:20779/mmu:56378/mmu:11867/mmu:13043/mmu:22376/mmu:14388/mmu:140580/mmu:74325/mmu:56526/mmu:52398/mmu:330662/mmu:53860/mmu:12386	22
KEGG	mmu05206	MicroRNAs in cancer	37/1155	140/6959	0.00196343	0.0110743	ENSMUSG00000001034/ENSMUSG00000004040/ENSMUSG00000005087/ENSMUSG00000005413/ENSMUSG00000007989/ENSMUSG00000009376/ENSMUSG00000015829/ENSMUSG00000016933/ENSMUSG00000020044/ENSMUSG00000020122/ENSMUSG00000020135/ENSMUSG00000023088/ENSMUSG00000023951/ENSMUSG00000024014/ENSMUSG00000024087/ENSMUSG00000026872/ENSMUSG00000026923/ENSMUSG00000027330/ENSMUSG00000027478/ENSMUSG00000027878/ENSMUSG00000028163/…	Mapk7/Stat3/Cd44/Hmox1/Fzd3/Met/Tnr/Plcg1/Timp3/Egfr/Apc2/Abcc1/Vegfa/Pim1/Cyp1b1/Zeb2/Notch1/Cdc25b/Dnmt3b/Notch2/Nfkb1/Stmn1/Abcb1b/Casp3/Cdc25a/Tnxb/Plcg2/Mcl1/Tgfb2/Thbs1/Slc7a1/Prkce/Prkcb/Irs1/Erbb2/Marcks/Ccnd1	mmu:23939/mmu:20848/mmu:12505/mmu:15368/mmu:14365/mmu:17295/mmu:21960/mmu:18803/mmu:21859/mmu:13649/mmu:23805/mmu:17250/mmu:22339/mmu:18712/mmu:13078/mmu:24136/mmu:18128/mmu:12531/mmu:13436/mmu:18129/mmu:18033/mmu:16765/mmu:18669/mmu:12367/mmu:12530/mmu:81877/mmu:234779/mmu:17210/mmu:21808/mmu:21825/mmu:11987/mmu:18754/mmu:18751/mmu:16367/mmu:13866/mmu:17118/mmu:12443	37
KEGG	mmu05414	Dilated cardiomyopathy (DCM)	26/1155	89/6959	0.00199048	0.0110743	ENSMUSG00000001507/ENSMUSG00000003352/ENSMUSG00000010066/ENSMUSG00000015533/ENSMUSG00000015968/ENSMUSG00000017412/ENSMUSG00000020654/ENSMUSG00000020723/ENSMUSG00000020758/ENSMUSG00000021313/ENSMUSG00000025321/ENSMUSG00000026414/ENSMUSG00000027009/ENSMUSG00000027087/ENSMUSG00000027940/ENSMUSG00000028063/ENSMUSG00000029156/ENSMUSG00000031799/ENSMUSG00000031980/ENSMUSG00000034664/ENSMUSG00000039115/…	Itga3/Cacnb3/Cacna2d2/Itga2/Cacna1d/Cacnb4/Adcy3/Cacng4/Itgb4/Ryr2/Itgb8/Tnnt2/Itga4/Itgav/Tpm3/Lmna/Sgcb/Tpm4/Agt/Itga2b/Itga9/Tgfb2/Dag1/Cacng5/Cacna1c/Slc8a1	mmu:16400/mmu:12297/mmu:56808/mmu:16398/mmu:12289/mmu:12298/mmu:104111/mmu:54377/mmu:192897/mmu:20191/mmu:320910/mmu:21956/mmu:16401/mmu:16410/mmu:59069/mmu:16905/mmu:24051/mmu:326618/mmu:11606/mmu:16399/mmu:104099/mmu:21808/mmu:13138/mmu:140723/mmu:12288/mmu:20541	26
KEGG	mmu05410	Hypertrophic cardiomyopathy (HCM)	25/1155	86/6959	0.00259297	0.0141687	ENSMUSG00000001507/ENSMUSG00000003352/ENSMUSG00000010066/ENSMUSG00000015533/ENSMUSG00000015968/ENSMUSG00000017412/ENSMUSG00000020723/ENSMUSG00000020758/ENSMUSG00000021313/ENSMUSG00000025321/ENSMUSG00000026414/ENSMUSG00000027009/ENSMUSG00000027087/ENSMUSG00000027940/ENSMUSG00000028063/ENSMUSG00000029156/ENSMUSG00000031799/ENSMUSG00000031980/ENSMUSG00000034664/ENSMUSG00000039115/ENSMUSG00000039239/…	Itga3/Cacnb3/Cacna2d2/Itga2/Cacna1d/Cacnb4/Cacng4/Itgb4/Ryr2/Itgb8/Tnnt2/Itga4/Itgav/Tpm3/Lmna/Sgcb/Tpm4/Agt/Itga2b/Itga9/Tgfb2/Dag1/Cacng5/Cacna1c/Slc8a1	mmu:16400/mmu:12297/mmu:56808/mmu:16398/mmu:12289/mmu:12298/mmu:54377/mmu:192897/mmu:20191/mmu:320910/mmu:21956/mmu:16401/mmu:16410/mmu:59069/mmu:16905/mmu:24051/mmu:326618/mmu:11606/mmu:16399/mmu:104099/mmu:21808/mmu:13138/mmu:140723/mmu:12288/mmu:20541	25
KEGG	mmu05032	Morphine addiction	26/1155	91/6959	0.00280417	0.015054	ENSMUSG00000000001/ENSMUSG00000004113/ENSMUSG00000004347/ENSMUSG00000007653/ENSMUSG00000010803/ENSMUSG00000018909/ENSMUSG00000020436/ENSMUSG00000020654/ENSMUSG00000021478/ENSMUSG00000023439/ENSMUSG00000028525/ENSMUSG00000029713/ENSMUSG00000030671/ENSMUSG00000031748/ENSMUSG00000032562/ENSMUSG00000033676/ENSMUSG00000034656/ENSMUSG00000036402/ENSMUSG00000038026/ENSMUSG00000039809/ENSMUSG00000041741/…	Gnai3/Cacna1b/Pde1c/Gabrb2/Gabra1/Arrb1/Gabrg2/Adcy3/Drd1a/Gnb3/Pde4b/Gnb2/Pde3b/Gnao1/Gnai2/Gabrb3/Cacna1a/Gng12/Kcnj9/Gabbr2/Pde3a/Adrbk2/Adora1/Prkcb/Gnai1/Gabrr3	mmu:14679/mmu:12287/mmu:18575/mmu:14401/mmu:14394/mmu:109689/mmu:14406/mmu:104111/mmu:13488/mmu:14695/mmu:18578/mmu:14693/mmu:18576/mmu:14681/mmu:14678/mmu:14402/mmu:12286/mmu:14701/mmu:16524/mmu:242425/mmu:54611/mmu:320129/mmu:11539/mmu:18751/mmu:14677/mmu:328699	26
KEGG	mmu04625	C-type lectin receptor signaling pathway	29/1155	105/6959	0.00288613	0.0152268	ENSMUSG00000002325/ENSMUSG00000002983/ENSMUSG00000004056/ENSMUSG00000016528/ENSMUSG00000018334/ENSMUSG00000018899/ENSMUSG00000020941/ENSMUSG00000021457/ENSMUSG00000024927/ENSMUSG00000025225/ENSMUSG00000025888/ENSMUSG00000026029/ENSMUSG00000026104/ENSMUSG00000027544/ENSMUSG00000027646/ENSMUSG00000028163/ENSMUSG00000030102/ENSMUSG00000032470/ENSMUSG00000033016/ENSMUSG00000034330/ENSMUSG00000037868/…	Irf9/Relb/Akt2/Mapkapk2/Ksr1/Irf1/Map3k14/Syk/Rela/Nfkb2/Casp1/Casp8/Stat1/Nfatc2/Src/Nfkb1/Itpr1/Mras/Nfatc1/Plcg2/Egr2/Rras/Stat2/Mapk10/Jun/Bcl3/Rras2/Fcer1g/Mapk3	mmu:16391/mmu:19698/mmu:11652/mmu:17164/mmu:16706/mmu:16362/mmu:53859/mmu:20963/mmu:19697/mmu:18034/mmu:12362/mmu:12370/mmu:20846/mmu:18019/mmu:20779/mmu:18033/mmu:16438/mmu:17532/mmu:18018/mmu:234779/mmu:13654/mmu:20130/mmu:20847/mmu:26414/mmu:16476/mmu:12051/mmu:66922/mmu:14127/mmu:26417	29
KEGG	mmu04151	PI3K-Akt signaling pathway	74/1155	330/6959	0.00301076	0.0156151	ENSMUSG00000000120/ENSMUSG00000001119/ENSMUSG00000001507/ENSMUSG00000001847/ENSMUSG00000001930/ENSMUSG00000004056/ENSMUSG00000004791/ENSMUSG00000005320/ENSMUSG00000006445/ENSMUSG00000009376/ENSMUSG00000014599/ENSMUSG00000015533/ENSMUSG00000015647/ENSMUSG00000015829/ENSMUSG00000019970/ENSMUSG00000019982/ENSMUSG00000020122/ENSMUSG00000020241/ENSMUSG00000020573/ENSMUSG00000020758/ENSMUSG00000020901/…	Ngfr/Col6a1/Itga3/Rac1/Vwf/Akt2/Pgf/Fgfr4/Epha2/Met/Csf1/Itga2/Lama5/Tnr/Sgk1/Myb/Egfr/Col6a2/Pik3cg/Itgb4/Pik3r5/Syk/Thbs4/Osmr/Col2a1/Ifnar2/Gnb3/Vegfa/Csf1r/Rela/Pik3ap1/Itgb8/Sgk3/Fn1/Itga4/Itgav/Il6ra/Efna1/Tlr2/Ntrk1/Nfkb1/Csf3r/Areg/Flt1/Gnb2/Tgfa/Il4ra/Col4a1/Fgfr1/Jak3/Chrm1/Tnxb/Ccnd3/Itga2b/Gng12/Fgf2/Mcl1/Creb3l2/Tlr4/Itga9/Magi2/Thbs1/Reln/Flt3/Igf2/Lamb2/Ntrk2/Irs1/Erbb2/Kdr/Mapk3/L…	mmu:18053/mmu:12833/mmu:16400/mmu:19353/mmu:22371/mmu:11652/mmu:18654/mmu:14186/mmu:13836/mmu:17295/mmu:12977/mmu:16398/mmu:16776/mmu:21960/mmu:20393/mmu:17863/mmu:13649/mmu:12834/mmu:30955/mmu:192897/mmu:320207/mmu:20963/mmu:21828/mmu:18414/mmu:12824/mmu:15976/mmu:14695/mmu:22339/mmu:12978/mmu:19697/mmu:83490/mmu:320910/mmu:170755/mmu:14268/mmu:16401/mmu:16410/mmu:16194/mmu:13636/mmu:24088/mmu:1…	74
KEGG	mmu05161	Hepatitis B	38/1155	150/6959	0.00383208	0.0195436	ENSMUSG00000002147/ENSMUSG00000004040/ENSMUSG00000004056/ENSMUSG00000019979/ENSMUSG00000020919/ENSMUSG00000021754/ENSMUSG00000024778/ENSMUSG00000024927/ENSMUSG00000025498/ENSMUSG00000025887/ENSMUSG00000026029/ENSMUSG00000026104/ENSMUSG00000026896/ENSMUSG00000027544/ENSMUSG00000027646/ENSMUSG00000027995/ENSMUSG00000028163/ENSMUSG00000031392/ENSMUSG00000031628/ENSMUSG00000031639/ENSMUSG00000031805/…	Stat6/Stat3/Akt2/Apaf1/Stat5b/Map3k1/Fas/Rela/Irf7/Casp12/Casp8/Stat1/Ifih1/Nfatc2/Src/Tlr2/Nfkb1/Irak1/Casp3/Tlr3/Jak3/Tirap/Tyk2/Smad3/Tgfbr2/Myd88/Nfatc1/Egr2/Creb3l2/Tlr4/Tgfb2/Stat2/Ddx58/Mapk10/Jun/Prkcb/Irak4/Mapk3	mmu:20852/mmu:20848/mmu:11652/mmu:11783/mmu:20851/mmu:26401/mmu:14102/mmu:19697/mmu:54123/mmu:12364/mmu:12370/mmu:20846/mmu:71586/mmu:18019/mmu:20779/mmu:24088/mmu:18033/mmu:16179/mmu:12367/mmu:142980/mmu:16453/mmu:117149/mmu:54721/mmu:17127/mmu:21813/mmu:17874/mmu:18018/mmu:13654/mmu:208647/mmu:21898/mmu:21808/mmu:20847/mmu:230073/mmu:26414/mmu:16476/mmu:18751/mmu:266632/mmu:26417	38
KEGG	mmu04530	Tight junction	40/1155	161/6959	0.00441815	0.0221632	ENSMUSG00000000881/ENSMUSG00000001672/ENSMUSG00000001847/ENSMUSG00000002489/ENSMUSG00000006699/ENSMUSG00000009073/ENSMUSG00000013076/ENSMUSG00000015968/ENSMUSG00000020580/ENSMUSG00000020733/ENSMUSG00000021754/ENSMUSG00000022443/ENSMUSG00000022952/ENSMUSG00000027646/ENSMUSG00000027935/ENSMUSG00000028059/ENSMUSG00000028076/ENSMUSG00000028434/ENSMUSG00000030137/ENSMUSG00000030403/ENSMUSG00000030739/…	Dlg3/Marveld3/Rac1/Tiam1/Cdc42/Nf2/Amotl1/Cacna1d/Rock2/Slc9a3r1/Map3k1/Myh9/Runx1/Src/Rab13/Arhgef2/Cd1d1/Epb4.1l4b/Tuba8/Vasp/Myh14/Cttn/Was/Msn/Jam3/Nedd4/Micall2/Rab8b/F11r/Amot/Synpo/Crb3/Prkce/Mapk10/Dlg2/Jun/Erbb2/Cgn/Ccnd1/Map3k5	mmu:53310/mmu:73608/mmu:19353/mmu:21844/mmu:12540/mmu:18016/mmu:75723/mmu:12289/mmu:19878/mmu:26941/mmu:26401/mmu:17886/mmu:12394/mmu:20779/mmu:68328/mmu:16800/mmu:12479/mmu:54357/mmu:53857/mmu:22323/mmu:71960/mmu:13043/mmu:22376/mmu:17698/mmu:83964/mmu:17999/mmu:231830/mmu:235442/mmu:16456/mmu:27494/mmu:104027/mmu:224912/mmu:18754/mmu:26414/mmu:23859/mmu:16476/mmu:13866/mmu:70737/mmu:12443/mmu:2…	40
KEGG	mmu05132	Salmonella infection	22/1155	76/6959	0.00482565	0.0234522	ENSMUSG00000000982/ENSMUSG00000001847/ENSMUSG00000006699/ENSMUSG00000020580/ENSMUSG00000022965/ENSMUSG00000024927/ENSMUSG00000025278/ENSMUSG00000025888/ENSMUSG00000027805/ENSMUSG00000028163/ENSMUSG00000029465/ENSMUSG00000029622/ENSMUSG00000031165/ENSMUSG00000031328/ENSMUSG00000032508/ENSMUSG00000039005/ENSMUSG00000046709/ENSMUSG00000051439/ENSMUSG00000052684/ENSMUSG00000052688/ENSMUSG00000063065/…	Ccl3/Rac1/Cdc42/Rock2/Ifngr2/Rela/Flnb/Casp1/Pfn2/Nfkb1/Arpc3/Arpc1b/Was/Flna/Myd88/Tlr4/Mapk10/Cd14/Jun/5430435G22Rik/Mapk3/Flnc	mmu:20302/mmu:19353/mmu:12540/mmu:19878/mmu:15980/mmu:19697/mmu:286940/mmu:12362/mmu:18645/mmu:18033/mmu:56378/mmu:11867/mmu:22376/mmu:192176/mmu:17874/mmu:21898/mmu:26414/mmu:12475/mmu:16476/mmu:226421/mmu:26417/mmu:68794	22
KEGG	mmu04722	Neurotrophin signaling pathway	31/1155	118/6959	0.0048284	0.0234522	ENSMUSG00000000120/ENSMUSG00000001034/ENSMUSG00000001847/ENSMUSG00000003644/ENSMUSG00000004056/ENSMUSG00000005057/ENSMUSG00000006699/ENSMUSG00000016528/ENSMUSG00000016933/ENSMUSG00000020227/ENSMUSG00000020312/ENSMUSG00000021448/ENSMUSG00000021754/ENSMUSG00000021820/ENSMUSG00000023947/ENSMUSG00000024927/ENSMUSG00000025132/ENSMUSG00000028072/ENSMUSG00000028163/ENSMUSG00000031392/ENSMUSG00000031714/…	Ngfr/Mapk7/Rac1/Rps6ka1/Akt2/Sh2b2/Cdc42/Mapkapk2/Plcg1/Irak3/Shc2/Shc3/Map3k1/Camk2g/Nfkbie/Rela/Arhgdia/Ntrk1/Nfkb1/Irak1/Gab1/Plcg2/Mapk10/Jun/Ntrk2/Irs1/Camk2b/Irak4/Irak2/Mapk3/Map3k5	mmu:18053/mmu:23939/mmu:19353/mmu:20111/mmu:11652/mmu:23921/mmu:12540/mmu:17164/mmu:18803/mmu:73914/mmu:216148/mmu:20418/mmu:26401/mmu:12325/mmu:18037/mmu:19697/mmu:192662/mmu:18211/mmu:18033/mmu:16179/mmu:14388/mmu:234779/mmu:26414/mmu:16476/mmu:18212/mmu:16367/mmu:12323/mmu:266632/mmu:108960/mmu:26417/mmu:26408	31
KEGG	mmu04071	Sphingolipid signaling pathway	31/1155	119/6959	0.00552033	0.0263941	ENSMUSG00000000001/ENSMUSG00000000562/ENSMUSG00000001847/ENSMUSG00000004056/ENSMUSG00000004508/ENSMUSG00000007891/ENSMUSG00000019843/ENSMUSG00000020097/ENSMUSG00000020580/ENSMUSG00000020828/ENSMUSG00000023021/ENSMUSG00000023088/ENSMUSG00000024927/ENSMUSG00000027035/ENSMUSG00000028163/ENSMUSG00000030341/ENSMUSG00000031887/ENSMUSG00000032562/ENSMUSG00000033220/ENSMUSG00000039943/ENSMUSG00000042429/…	Gnai3/Adora3/Rac1/Akt2/Gab2/Ctsd/Fyn/Sgpl1/Rock2/Pld2/Cers5/Abcc1/Rela/Cers6/Nfkb1/Tnfrsf1a/Tradd/Gnai2/Rac2/Plcb4/Adora1/S1pr2/Prkce/Mapk10/Prkcb/Gnai1/Fcer1g/Mapk3/S1pr3/Map3k5/Cers1	mmu:14679/mmu:11542/mmu:19353/mmu:11652/mmu:14389/mmu:13033/mmu:14360/mmu:20397/mmu:19878/mmu:18806/mmu:71949/mmu:17250/mmu:19697/mmu:241447/mmu:18033/mmu:21937/mmu:71609/mmu:14678/mmu:19354/mmu:18798/mmu:11539/mmu:14739/mmu:18754/mmu:26414/mmu:18751/mmu:14677/mmu:14127/mmu:26417/mmu:13610/mmu:26408/mmu:93898	31
KEGG	mmu05144	Malaria	15/1155	46/6959	0.00566937	0.0266897	ENSMUSG00000000290/ENSMUSG00000009376/ENSMUSG00000021702/ENSMUSG00000027962/ENSMUSG00000027995/ENSMUSG00000032508/ENSMUSG00000035352/ENSMUSG00000037405/ENSMUSG00000037706/ENSMUSG00000037872/ENSMUSG00000039005/ENSMUSG00000039239/ENSMUSG00000040152/ENSMUSG00000040249/ENSMUSG00000090523	Itgb2/Met/Thbs4/Vcam1/Tlr2/Myd88/Ccl12/Icam1/Cd81/Ackr1/Tlr4/Tgfb2/Thbs1/Lrp1/Gypc	mmu:16414/mmu:17295/mmu:21828/mmu:22329/mmu:24088/mmu:17874/mmu:20293/mmu:15894/mmu:12520/mmu:13349/mmu:21898/mmu:21808/mmu:21825/mmu:16971/mmu:71683	15
KEGG	mmu04921	Oxytocin signaling pathway	37/1155	149/6959	0.00609187	0.0279655	ENSMUSG00000000001/ENSMUSG00000001034/ENSMUSG00000003352/ENSMUSG00000009292/ENSMUSG00000010066/ENSMUSG00000015968/ENSMUSG00000017412/ENSMUSG00000020122/ENSMUSG00000020573/ENSMUSG00000020580/ENSMUSG00000020654/ENSMUSG00000020723/ENSMUSG00000020901/ENSMUSG00000021313/ENSMUSG00000021820/ENSMUSG00000027544/ENSMUSG00000027646/ENSMUSG00000028005/ENSMUSG00000028469/ENSMUSG00000029084/ENSMUSG00000030102/…	Gnai3/Mapk7/Cacnb3/Trpm2/Cacna2d2/Cacna1d/Cacnb4/Egfr/Pik3cg/Rock2/Adcy3/Cacng4/Pik3r5/Ryr2/Camk2g/Nfatc2/Src/Gucy1b3/Npr2/Cd38/Itpr1/Camk1/Gnao1/Gnai2/Nfatc1/Gucy1a3/Eef2k/Kcnj9/Plcb4/Cacng5/Cacna1c/Jun/Prkcb/Gnai1/Camk2b/Mapk3/Ccnd1	mmu:14679/mmu:23939/mmu:12297/mmu:28240/mmu:56808/mmu:12289/mmu:12298/mmu:13649/mmu:30955/mmu:19878/mmu:104111/mmu:54377/mmu:320207/mmu:20191/mmu:12325/mmu:18019/mmu:20779/mmu:54195/mmu:230103/mmu:12494/mmu:16438/mmu:52163/mmu:14681/mmu:14678/mmu:18018/mmu:60596/mmu:13631/mmu:16524/mmu:18798/mmu:140723/mmu:12288/mmu:16476/mmu:18751/mmu:14677/mmu:12323/mmu:26417/mmu:12443	37
KEGG	mmu04610	Complement and coagulation cascades	23/1155	82/6959	0.00612317	0.0279655	ENSMUSG00000000290/ENSMUSG00000001930/ENSMUSG00000016493/ENSMUSG00000022037/ENSMUSG00000022912/ENSMUSG00000023224/ENSMUSG00000024164/ENSMUSG00000026365/ENSMUSG00000028128/ENSMUSG00000030111/ENSMUSG00000030786/ENSMUSG00000030789/ENSMUSG00000031538/ENSMUSG00000032679/ENSMUSG00000036887/ENSMUSG00000036896/ENSMUSG00000036905/ENSMUSG00000040552/ENSMUSG00000049130/ENSMUSG00000055172/ENSMUSG00000058952/…	Itgb2/Vwf/Cd46/Clu/Pros1/Serping1/C3/Cfh/F3/A2m/Itgam/Itgax/Plat/Cd59a/C1qa/C1qc/C1qb/C3ar1/C5ar1/C1ra/Cfi/Cd59b/C4b	mmu:16414/mmu:22371/mmu:17221/mmu:12759/mmu:19128/mmu:12258/mmu:12266/mmu:12628/mmu:14066/mmu:232345/mmu:16409/mmu:16411/mmu:18791/mmu:12509/mmu:12259/mmu:12262/mmu:12260/mmu:12267/mmu:12273/mmu:50909/mmu:12630/mmu:333883/mmu:12268	23
KEGG	mmu04611	Platelet activation	31/1155	120/6959	0.00629346	0.0283206	ENSMUSG00000000001/ENSMUSG00000001930/ENSMUSG00000002699/ENSMUSG00000004056/ENSMUSG00000015533/ENSMUSG00000019843/ENSMUSG00000020573/ENSMUSG00000020580/ENSMUSG00000020654/ENSMUSG00000020901/ENSMUSG00000021457/ENSMUSG00000024965/ENSMUSG00000026786/ENSMUSG00000027347/ENSMUSG00000027646/ENSMUSG00000028005/ENSMUSG00000030102/ENSMUSG00000030403/ENSMUSG00000032562/ENSMUSG00000033910/ENSMUSG00000034330/…	Gnai3/Vwf/Lcp2/Akt2/Itga2/Fyn/Pik3cg/Rock2/Adcy3/Pik3r5/Syk/Fermt3/Apbb1ip/Rasgrp1/Src/Gucy1b3/Itpr1/Vasp/Gnai2/Gucy1a3/Plcg2/Itga2b/P2ry12/Plcb4/Lyn/Ptgs1/Orai1/Prkg1/Gnai1/Fcer1g/Mapk3	mmu:14679/mmu:22371/mmu:16822/mmu:11652/mmu:16398/mmu:14360/mmu:30955/mmu:19878/mmu:104111/mmu:320207/mmu:20963/mmu:108101/mmu:54519/mmu:19419/mmu:20779/mmu:54195/mmu:16438/mmu:22323/mmu:14678/mmu:60596/mmu:234779/mmu:16399/mmu:70839/mmu:18798/mmu:17096/mmu:19224/mmu:109305/mmu:19091/mmu:14677/mmu:14127/mmu:26417	31
KEGG	mmu04730	Long-term depression	18/1155	60/6959	0.00689067	0.0305586	ENSMUSG00000000001/ENSMUSG00000001986/ENSMUSG00000002930/ENSMUSG00000020524/ENSMUSG00000028005/ENSMUSG00000030102/ENSMUSG00000031748/ENSMUSG00000032562/ENSMUSG00000033910/ENSMUSG00000033981/ENSMUSG00000034656/ENSMUSG00000039943/ENSMUSG00000042228/ENSMUSG00000052889/ENSMUSG00000052920/ENSMUSG00000057614/ENSMUSG00000063065/ENSMUSG00000071424	Gnai3/Gria3/Ppp1r17/Gria1/Gucy1b3/Itpr1/Gnao1/Gnai2/Gucy1a3/Gria2/Cacna1a/Plcb4/Lyn/Prkcb/Prkg1/Gnai1/Mapk3/Grid2	mmu:14679/mmu:53623/mmu:19051/mmu:14799/mmu:54195/mmu:16438/mmu:14681/mmu:14678/mmu:60596/mmu:14800/mmu:12286/mmu:18798/mmu:17096/mmu:18751/mmu:19091/mmu:14677/mmu:26417/mmu:14804	18
KEGG	mmu05134	Legionellosis	17/1155	56/6959	0.00749016	0.0327427	ENSMUSG00000000290/ENSMUSG00000019979/ENSMUSG00000024164/ENSMUSG00000024927/ENSMUSG00000025225/ENSMUSG00000025888/ENSMUSG00000026029/ENSMUSG00000027995/ENSMUSG00000028163/ENSMUSG00000030786/ENSMUSG00000031628/ENSMUSG00000032508/ENSMUSG00000037742/ENSMUSG00000039005/ENSMUSG00000051439/ENSMUSG00000078942/ENSMUSG00000078945	Itgb2/Apaf1/C3/Rela/Nfkb2/Casp1/Casp8/Tlr2/Nfkb1/Itgam/Casp3/Myd88/Eef1a1/Tlr4/Cd14/Naip6/Naip2	mmu:16414/mmu:11783/mmu:12266/mmu:19697/mmu:18034/mmu:12362/mmu:12370/mmu:24088/mmu:18033/mmu:16409/mmu:12367/mmu:17874/mmu:13627/mmu:21898/mmu:12475/mmu:17952/mmu:17948	17
KEGG	mmu04725	Cholinergic synapse	29/1155	112/6959	0.00779456	0.0335935	ENSMUSG00000000001/ENSMUSG00000004056/ENSMUSG00000004113/ENSMUSG00000015968/ENSMUSG00000016346/ENSMUSG00000019843/ENSMUSG00000020573/ENSMUSG00000020654/ENSMUSG00000020901/ENSMUSG00000021820/ENSMUSG00000023328/ENSMUSG00000023439/ENSMUSG00000028631/ENSMUSG00000029713/ENSMUSG00000030102/ENSMUSG00000031748/ENSMUSG00000032562/ENSMUSG00000032773/ENSMUSG00000034656/ENSMUSG00000035200/ENSMUSG00000036402/…	Gnai3/Akt2/Cacna1b/Cacna1d/Kcnq2/Fyn/Pik3cg/Adcy3/Pik3r5/Camk2g/Ache/Gnb3/Kcnq4/Gnb2/Itpr1/Gnao1/Gnai2/Chrm1/Cacna1a/Chrnb4/Gng12/Creb3l2/Plcb4/Chrm3/Cacna1c/Prkcb/Gnai1/Camk2b/Mapk3	mmu:14679/mmu:11652/mmu:12287/mmu:12289/mmu:16536/mmu:14360/mmu:30955/mmu:104111/mmu:320207/mmu:12325/mmu:11423/mmu:14695/mmu:60613/mmu:14693/mmu:16438/mmu:14681/mmu:14678/mmu:12669/mmu:12286/mmu:108015/mmu:14701/mmu:208647/mmu:18798/mmu:12671/mmu:12288/mmu:18751/mmu:14677/mmu:12323/mmu:26417	29
KEGG	mmu04066	HIF-1 signaling pathway	27/1155	103/6959	0.00844986	0.0357693	ENSMUSG00000001131/ENSMUSG00000004040/ENSMUSG00000004056/ENSMUSG00000005413/ENSMUSG00000015340/ENSMUSG00000016933/ENSMUSG00000020080/ENSMUSG00000020122/ENSMUSG00000020190/ENSMUSG00000021820/ENSMUSG00000022965/ENSMUSG00000023951/ENSMUSG00000024927/ENSMUSG00000025877/ENSMUSG00000027947/ENSMUSG00000028163/ENSMUSG00000028708/ENSMUSG00000029648/ENSMUSG00000030339/ENSMUSG00000032554/ENSMUSG00000034330/…	Timp1/Stat3/Akt2/Hmox1/Cybb/Plcg1/Hkdc1/Egfr/Mknk2/Camk2g/Ifngr2/Vegfa/Rela/Hk3/Il6ra/Nfkb1/Mknk1/Flt1/Ltbr/Trf/Plcg2/Hk1/Tlr4/Prkcb/Camk2b/Erbb2/Mapk3	mmu:21857/mmu:20848/mmu:11652/mmu:15368/mmu:13058/mmu:18803/mmu:216019/mmu:13649/mmu:17347/mmu:12325/mmu:15980/mmu:22339/mmu:19697/mmu:212032/mmu:16194/mmu:18033/mmu:17346/mmu:14254/mmu:17000/mmu:22041/mmu:234779/mmu:15275/mmu:21898/mmu:18751/mmu:12323/mmu:13866/mmu:26417	27
KEGG	mmu05166	Human T-cell leukemia virus 1 infection	51/1155	223/6959	0.00853319	0.0357693	ENSMUSG00000000290/ENSMUSG00000000409/ENSMUSG00000002111/ENSMUSG00000002983/ENSMUSG00000004056/ENSMUSG00000016206/ENSMUSG00000020654/ENSMUSG00000020919/ENSMUSG00000020941/ENSMUSG00000021754/ENSMUSG00000022895/ENSMUSG00000023206/ENSMUSG00000024912/ENSMUSG00000024927/ENSMUSG00000025225/ENSMUSG00000025810/ENSMUSG00000026072/ENSMUSG00000027544/ENSMUSG00000028163/ENSMUSG00000028551/ENSMUSG00000029472/…	Itgb2/Lck/Spi1/Relb/Akt2/H2-M3/Adcy3/Stat5b/Map3k14/Map3k1/Ets2/Il15ra/Fosl1/Rela/Nfkb2/Nrp1/Il1r1/Nfatc2/Nfkb1/Cdkn2c/Anapc5/Ltbr/Tnfrsf1a/Jak3/Ets1/Smad3/Tgfbr2/Nfatc1/Ccnd3/H2-Q4/H2-Aa/Icam1/Egr2/Creb3l2/Tgfb2/Bub1b/Tspo/Zfp36/Mapk10/Jun/H2-T22/H2-Q7/H2-Eb1/B2m/H2-K1/Mapk3/H2-T23/Ccnd1/H2-Q6/H2-D1/H2-Ab1	mmu:16414/mmu:16818/mmu:20375/mmu:19698/mmu:11652/mmu:14991/mmu:104111/mmu:20851/mmu:53859/mmu:26401/mmu:23872/mmu:16169/mmu:14283/mmu:19697/mmu:18034/mmu:18186/mmu:16177/mmu:18019/mmu:18033/mmu:12580/mmu:59008/mmu:17000/mmu:21937/mmu:16453/mmu:23871/mmu:17127/mmu:21813/mmu:18018/mmu:12445/mmu:15015/mmu:14960/mmu:15894/mmu:13654/mmu:208647/mmu:21808/mmu:12236/mmu:12257/mmu:22695/mmu:26414/mmu:164…	51
KEGG	mmu05321	Inflammatory bowel disease (IBD)	17/1155	57/6959	0.00906565	0.0374877	ENSMUSG00000002147/ENSMUSG00000004040/ENSMUSG00000022965/ENSMUSG00000024927/ENSMUSG00000026104/ENSMUSG00000027718/ENSMUSG00000027995/ENSMUSG00000028163/ENSMUSG00000030748/ENSMUSG00000032402/ENSMUSG00000033016/ENSMUSG00000036594/ENSMUSG00000039005/ENSMUSG00000039239/ENSMUSG00000052684/ENSMUSG00000060586/ENSMUSG00000073421	Stat6/Stat3/Ifngr2/Rela/Stat1/Il21/Tlr2/Nfkb1/Il4ra/Smad3/Nfatc1/H2-Aa/Tlr4/Tgfb2/Jun/H2-Eb1/H2-Ab1	mmu:20852/mmu:20848/mmu:15980/mmu:19697/mmu:20846/mmu:60505/mmu:24088/mmu:18033/mmu:16190/mmu:17127/mmu:18018/mmu:14960/mmu:21898/mmu:21808/mmu:16476/mmu:14969/mmu:14961	17
