# Supplementary material for: Homeostatic plasticity in the retina is associated with maintenance of night vision during retinal degenerative disease
Source: eLife. 2020 Sep 22;9:e59422. doi: 10.7554/eLife.59422 (PMC7529457; doi:10.7554/eLife.59422)
Supplement: Supplementary file 9. [file elife-59422-supp9.xls]

## Sheet: HetvsWT_down.Reactomeenrich.sig
Enrich_Category	ReactomeID	Description	GeneRatio	BgRatio	pvalue	padj	geneID	geneName	Count
Reactome	R-MMU-5617833	Cilium Assembly	62/1021	178/7812	4.82046e-14	4.40108e-11	ENSMUSG00000006464/ENSMUSG00000007867/ENSMUSG00000018707/ENSMUSG00000019971/ENSMUSG00000019986/ENSMUSG00000021013/ENSMUSG00000021270/ENSMUSG00000022911/ENSMUSG00000023004/ENSMUSG00000023072/ENSMUSG00000024253/ENSMUSG00000025008/ENSMUSG00000025035/ENSMUSG00000025224/ENSMUSG00000025228/ENSMUSG00000025245/ENSMUSG00000025758/ENSMUSG00000026239/ENSMUSG00000026504/ENSMUSG00000027475/ENSMUSG00000027778/…	Bbs1/Ift43/Dync1h1/Cep290/Ahi1/Ttc8/Hsp90aa1/Arl13b/Tuba1b/Cep89/Dync2li1/Tctn3/Arl3/Gbf1/Actr1a/Lztfl1/Plk4/Pde6d/Sdccag8/Kif3b/Ift80/Ift74/Ift81/Cep41/Ift122/Rho/Cnga4/Cetn2/Bbs2/Cngb1/Cep57/Cep63/Rpgrip1l/Ccp110/Mks1/Traf3ip1/Ttc21b/Bbs9/Bbs7/Wdr19/Haus6/Cep250/Ift172/Tctn1/Cdk5rap2/Wdr34/Cc2d2a/Ift88/Ofd1/Haus1/Wdr60/Cep164/Dync2h1/Tmem67/Sclt1/Bbs5/Clasp1/Cep152/Fgfr1op/Ttc30a1/Ttc30b/Ttbk2	62
Reactome	R-MMU-2514856	The phototransduction cascade	20/1021	27/7812	6.4039e-13	2.00565e-10	ENSMUSG00000020599/ENSMUSG00000020890/ENSMUSG00000020907/ENSMUSG00000020936/ENSMUSG00000023979/ENSMUSG00000023982/ENSMUSG00000024575/ENSMUSG00000025386/ENSMUSG00000029064/ENSMUSG00000029491/ENSMUSG00000029663/ENSMUSG00000030324/ENSMUSG00000031450/ENSMUSG00000031789/ENSMUSG00000032192/ENSMUSG00000034837/ENSMUSG00000042282/ENSMUSG00000052783/ENSMUSG00000056043/ENSMUSG00000067220	Rgs9/Gucy2e/Rcvrn/Nmt1/Guca1b/Guca1a/Pde6a/Pde6g/Gnb1/Pde6b/Gngt1/Rho/Grk1/Cngb1/Gnb5/Gnat1/Gucy2f/Grk4/Rgs9bp/Cnga1	20
Reactome	R-MMU-1852241	Organelle biogenesis and maintenance	66/1021	206/7812	6.5903e-13	2.00565e-10	ENSMUSG00000006057/ENSMUSG00000006464/ENSMUSG00000007867/ENSMUSG00000008976/ENSMUSG00000018707/ENSMUSG00000019971/ENSMUSG00000019986/ENSMUSG00000021013/ENSMUSG00000021270/ENSMUSG00000022911/ENSMUSG00000023004/ENSMUSG00000023072/ENSMUSG00000024253/ENSMUSG00000025008/ENSMUSG00000025035/ENSMUSG00000025224/ENSMUSG00000025228/ENSMUSG00000025245/ENSMUSG00000025758/ENSMUSG00000026239/ENSMUSG00000026504/…	Atp5g1/Bbs1/Ift43/Gabpa/Dync1h1/Cep290/Ahi1/Ttc8/Hsp90aa1/Arl13b/Tuba1b/Cep89/Dync2li1/Tctn3/Arl3/Gbf1/Actr1a/Lztfl1/Plk4/Pde6d/Sdccag8/Gabpb1/Kif3b/Ift80/Ift74/Ift81/Sirt4/Cep41/Ift122/Rho/Cnga4/Cetn2/Bbs2/Cngb1/Cep57/Cep63/Rpgrip1l/Ccp110/Mks1/Traf3ip1/Ttc21b/Bbs9/Bbs7/Wdr19/Haus6/Cep250/Ift172/Tctn1/Cdk5rap2/Wdr34/Cc2d2a/Ift88/Ofd1/Haus1/Wdr60/Cep164/Dync2h1/Tmem67/Sclt1/Bbs5/Clasp1/Cep152/Fgf…	66
Reactome	R-MMU-2514859	Inactivation, recovery and regulation of the phototransduction cascade	19/1021	26/7812	3.69557e-12	8.43513e-10	ENSMUSG00000020599/ENSMUSG00000020890/ENSMUSG00000020907/ENSMUSG00000020936/ENSMUSG00000023979/ENSMUSG00000023982/ENSMUSG00000024575/ENSMUSG00000025386/ENSMUSG00000029491/ENSMUSG00000029663/ENSMUSG00000030324/ENSMUSG00000031450/ENSMUSG00000031789/ENSMUSG00000032192/ENSMUSG00000034837/ENSMUSG00000042282/ENSMUSG00000052783/ENSMUSG00000056043/ENSMUSG00000067220	Rgs9/Gucy2e/Rcvrn/Nmt1/Guca1b/Guca1a/Pde6a/Pde6g/Pde6b/Gngt1/Rho/Grk1/Cngb1/Gnb5/Gnat1/Gucy2f/Grk4/Rgs9bp/Cnga1	19
Reactome	R-MMU-72203	Processing of Capped Intron-Containing Pre-mRNA	67/1021	225/7812	1.89203e-11	3.45485e-09	ENSMUSG00000001017/ENSMUSG00000001767/ENSMUSG00000003226/ENSMUSG00000003360/ENSMUSG00000003660/ENSMUSG00000008373/ENSMUSG00000015165/ENSMUSG00000015748/ENSMUSG00000016018/ENSMUSG00000018379/ENSMUSG00000020705/ENSMUSG00000020719/ENSMUSG00000020739/ENSMUSG00000020850/ENSMUSG00000020929/ENSMUSG00000021134/ENSMUSG00000022023/ENSMUSG00000022142/ENSMUSG00000022160/ENSMUSG00000022635/ENSMUSG00000023118/…	Chtop/Crnkl1/Ranbp2/Ddx23/Snrnp200/Prpf31/Hnrnpl/Prpf3/Skiv2l2/Srsf1/Ddx42/Ddx5/Nup85/Prpf8/Eftud2/Srsf5/Wbp4/Nup155/Mettl3/Zcrb1/Sympk/Srsf7/Dhx16/Rbm22/Cwc22/Clp1/Cstf3/Mettl14/Ybx1/Srrm1/Srsf4/Tfip11/Rbmx/Thoc5/Cpsf7/Gcfc2/Upf3b/Aaas/Thoc2/Dhx38/Nup205/Nup133/Hnrnpu/Aqr/Nup88/Hnrnpul1/Pcf11/Poldip3/Hnrnpf/Cd2bp2/Zrsr1/Hnrnpa1/Nupl2/Nup160/Nup188/Nup107/Cstf2t/Pcbp2/Txnl4a/Hnrnpm/Ppih/Wtap/Prpf…	67
Reactome	R-MMU-72172	mRNA Splicing	49/1021	179/7812	1.94746e-07	2.96339e-05	ENSMUSG00000001767/ENSMUSG00000003360/ENSMUSG00000003660/ENSMUSG00000008373/ENSMUSG00000015165/ENSMUSG00000015748/ENSMUSG00000016018/ENSMUSG00000018379/ENSMUSG00000020705/ENSMUSG00000020719/ENSMUSG00000020850/ENSMUSG00000020929/ENSMUSG00000021134/ENSMUSG00000022023/ENSMUSG00000022635/ENSMUSG00000023118/ENSMUSG00000024097/ENSMUSG00000024422/ENSMUSG00000024604/ENSMUSG00000027014/ENSMUSG00000027079/…	Crnkl1/Ddx23/Snrnp200/Prpf31/Hnrnpl/Prpf3/Skiv2l2/Srsf1/Ddx42/Ddx5/Prpf8/Eftud2/Srsf5/Wbp4/Zcrb1/Sympk/Srsf7/Dhx16/Rbm22/Cwc22/Clp1/Cstf3/Ybx1/Srrm1/Srsf4/Tfip11/Rbmx/Cpsf7/Gcfc2/Upf3b/Dhx38/Hnrnpu/Aqr/Hnrnpul1/Pcf11/Hnrnpf/Cd2bp2/Zrsr1/Hnrnpa1/Cstf2t/Pcbp2/Txnl4a/Hnrnpm/Ppih/Prpf40a/Hnrnpr/Prpf4/Gtf2f2/Casc3	49
Reactome	R-MMU-72163	mRNA Splicing - Major Pathway	47/1021	170/7812	2.51328e-07	3.27803e-05	ENSMUSG00000001767/ENSMUSG00000003360/ENSMUSG00000003660/ENSMUSG00000008373/ENSMUSG00000015165/ENSMUSG00000015748/ENSMUSG00000016018/ENSMUSG00000018379/ENSMUSG00000020705/ENSMUSG00000020719/ENSMUSG00000020850/ENSMUSG00000020929/ENSMUSG00000021134/ENSMUSG00000022023/ENSMUSG00000023118/ENSMUSG00000024097/ENSMUSG00000024422/ENSMUSG00000024604/ENSMUSG00000027014/ENSMUSG00000027079/ENSMUSG00000027176/…	Crnkl1/Ddx23/Snrnp200/Prpf31/Hnrnpl/Prpf3/Skiv2l2/Srsf1/Ddx42/Ddx5/Prpf8/Eftud2/Srsf5/Wbp4/Sympk/Srsf7/Dhx16/Rbm22/Cwc22/Clp1/Cstf3/Ybx1/Srrm1/Srsf4/Tfip11/Rbmx/Cpsf7/Gcfc2/Upf3b/Dhx38/Hnrnpu/Aqr/Hnrnpul1/Pcf11/Hnrnpf/Cd2bp2/Hnrnpa1/Cstf2t/Pcbp2/Txnl4a/Hnrnpm/Ppih/Prpf40a/Hnrnpr/Prpf4/Gtf2f2/Casc3	47
Reactome	R-MMU-3108232	SUMO E3 ligases SUMOylate target proteins	33/1021	106/7812	8.7638e-07	0.000100017	ENSMUSG00000003226/ENSMUSG00000004934/ENSMUSG00000017146/ENSMUSG00000017485/ENSMUSG00000017548/ENSMUSG00000020739/ENSMUSG00000022142/ENSMUSG00000022314/ENSMUSG00000022391/ENSMUSG00000024660/ENSMUSG00000024974/ENSMUSG00000025862/ENSMUSG00000026739/ENSMUSG00000027109/ENSMUSG00000028101/ENSMUSG00000030528/ENSMUSG00000031347/ENSMUSG00000032405/ENSMUSG00000036678/ENSMUSG00000038759/ENSMUSG00000039509/…	Ranbp2/Pias4/Brca1/Top2b/Suz12/Nup85/Nup155/Rad21/Rangap1/Incenp/Smc3/Stag2/Bmi1/Sp3/Pias3/Blm/Cetn2/Pias1/Aaas/Nup205/Nup133/Nsmce4a/Nup88/Phc1/Trp53bp1/Nupl2/Nup160/Nup188/Nup107/Hist1h4c/Mdc1/Hist4h4/1700020D05Rik	33
Reactome	R-MMU-2990846	SUMOylation	34/1021	112/7812	1.15141e-06	0.000116804	ENSMUSG00000003226/ENSMUSG00000004934/ENSMUSG00000017146/ENSMUSG00000017485/ENSMUSG00000017548/ENSMUSG00000020739/ENSMUSG00000022142/ENSMUSG00000022314/ENSMUSG00000022391/ENSMUSG00000022855/ENSMUSG00000024660/ENSMUSG00000024974/ENSMUSG00000025862/ENSMUSG00000026739/ENSMUSG00000027109/ENSMUSG00000028101/ENSMUSG00000030528/ENSMUSG00000031347/ENSMUSG00000032405/ENSMUSG00000036678/ENSMUSG00000038759/…	Ranbp2/Pias4/Brca1/Top2b/Suz12/Nup85/Nup155/Rad21/Rangap1/Senp2/Incenp/Smc3/Stag2/Bmi1/Sp3/Pias3/Blm/Cetn2/Pias1/Aaas/Nup205/Nup133/Nsmce4a/Nup88/Phc1/Trp53bp1/Nupl2/Nup160/Nup188/Nup107/Hist1h4c/Mdc1/Hist4h4/1700020D05Rik	34
Reactome	R-MMU-5620912	Anchoring of the basal body to the plasma membrane	30/1021	94/7812	1.53391e-06	0.000140046	ENSMUSG00000018707/ENSMUSG00000019971/ENSMUSG00000019986/ENSMUSG00000021270/ENSMUSG00000023072/ENSMUSG00000025008/ENSMUSG00000025228/ENSMUSG00000025758/ENSMUSG00000026504/ENSMUSG00000029790/ENSMUSG00000031347/ENSMUSG00000031922/ENSMUSG00000032534/ENSMUSG00000033282/ENSMUSG00000033904/ENSMUSG00000034121/ENSMUSG00000038047/ENSMUSG00000038241/ENSMUSG00000038593/ENSMUSG00000039298/ENSMUSG00000039765/…	Dync1h1/Cep290/Ahi1/Hsp90aa1/Cep89/Tctn3/Actr1a/Plk4/Sdccag8/Cep41/Cetn2/Cep57/Cep63/Rpgrip1l/Ccp110/Mks1/Haus6/Cep250/Tctn1/Cdk5rap2/Cc2d2a/Ofd1/Haus1/Cep164/Tmem67/Sclt1/Clasp1/Cep152/Fgfr1op/Ttbk2	30
Reactome	R-MMU-1640170	Cell Cycle	101/1021	500/7812	2.60657e-06	0.000216345	ENSMUSG00000000028/ENSMUSG00000000552/ENSMUSG00000002814/ENSMUSG00000003226/ENSMUSG00000004934/ENSMUSG00000005233/ENSMUSG00000014859/ENSMUSG00000017146/ENSMUSG00000018707/ENSMUSG00000019971/ENSMUSG00000020107/ENSMUSG00000020413/ENSMUSG00000020492/ENSMUSG00000020593/ENSMUSG00000020739/ENSMUSG00000020974/ENSMUSG00000021051/ENSMUSG00000021270/ENSMUSG00000021635/ENSMUSG00000021693/ENSMUSG00000021832/…	Cdc45/Zfp385a/Top3a/Ranbp2/Pias4/Spc25/E2f4/Brca1/Dync1h1/Cep290/Anapc16/Hus1/Ska2/Lpin1/Nup85/Pole2/Ppp2r5e/Hsp90aa1/Rad17/Kif2a/Psmc6/Nipbl/Nup155/Rad1/Rad21/Rangap1/Pkmyt1/Esco1/Incenp/Smc3/Btrc/Actr1a/Atrip/Plk4/Stag2/Sdccag8/Blzf1/Cenpf/Mcm10/Optn/Orc4/Kif18a/Mcm8/Aurka/Rpa2/Cenpa/Cdc7/Ankle2/Cep41/Mad2l1/Blm/Psmd8/Anapc15/Pold3/Brcc3/Cetn2/Gins4/Rbl2/Orc6/Cenpn/Mau2/Cep57/Mre11a/Gorasp1/Cep…	101
Reactome	R-MMU-3108214	SUMOylation of DNA damage response and repair proteins	24/1021	69/7812	3.13303e-06	0.000238372	ENSMUSG00000003226/ENSMUSG00000004934/ENSMUSG00000017146/ENSMUSG00000020739/ENSMUSG00000022142/ENSMUSG00000022314/ENSMUSG00000024974/ENSMUSG00000025862/ENSMUSG00000026739/ENSMUSG00000030528/ENSMUSG00000031347/ENSMUSG00000032405/ENSMUSG00000036678/ENSMUSG00000038759/ENSMUSG00000039509/ENSMUSG00000040331/ENSMUSG00000040667/ENSMUSG00000040669/ENSMUSG00000048439/ENSMUSG00000051329/ENSMUSG00000052533/…	Ranbp2/Pias4/Brca1/Nup85/Nup155/Rad21/Smc3/Stag2/Bmi1/Blm/Cetn2/Pias1/Aaas/Nup205/Nup133/Nsmce4a/Nup88/Phc1/Nupl2/Nup160/Nup188/Nup107/Mdc1/1700020D05Rik	24
Reactome	R-MMU-159236	Transport of Mature mRNA derived from an Intron-Containing Transcript	23/1021	67/7812	6.46506e-06	0.000421615	ENSMUSG00000001017/ENSMUSG00000003226/ENSMUSG00000018379/ENSMUSG00000020739/ENSMUSG00000021134/ENSMUSG00000022142/ENSMUSG00000024097/ENSMUSG00000028809/ENSMUSG00000028911/ENSMUSG00000034274/ENSMUSG00000036572/ENSMUSG00000036678/ENSMUSG00000037475/ENSMUSG00000037993/ENSMUSG00000038759/ENSMUSG00000039509/ENSMUSG00000040667/ENSMUSG00000041815/ENSMUSG00000048439/ENSMUSG00000051329/ENSMUSG00000052533/…	Chtop/Ranbp2/Srsf1/Nup85/Srsf5/Nup155/Srsf7/Srrm1/Srsf4/Thoc5/Upf3b/Aaas/Thoc2/Dhx38/Nup205/Nup133/Nup88/Poldip3/Nupl2/Nup160/Nup188/Nup107/Casc3	23
Reactome	R-MMU-72202	Transport of Mature Transcript to Cytoplasm	23/1021	67/7812	6.46506e-06	0.000421615	ENSMUSG00000001017/ENSMUSG00000003226/ENSMUSG00000018379/ENSMUSG00000020739/ENSMUSG00000021134/ENSMUSG00000022142/ENSMUSG00000024097/ENSMUSG00000028809/ENSMUSG00000028911/ENSMUSG00000034274/ENSMUSG00000036572/ENSMUSG00000036678/ENSMUSG00000037475/ENSMUSG00000037993/ENSMUSG00000038759/ENSMUSG00000039509/ENSMUSG00000040667/ENSMUSG00000041815/ENSMUSG00000048439/ENSMUSG00000051329/ENSMUSG00000052533/…	Chtop/Ranbp2/Srsf1/Nup85/Srsf5/Nup155/Srsf7/Srrm1/Srsf4/Thoc5/Upf3b/Aaas/Thoc2/Dhx38/Nup205/Nup133/Nup88/Poldip3/Nupl2/Nup160/Nup188/Nup107/Casc3	23
Reactome	R-MMU-73894	DNA Repair	59/1021	258/7812	7.95272e-06	0.000484055	ENSMUSG00000002814/ENSMUSG00000004934/ENSMUSG00000006599/ENSMUSG00000007646/ENSMUSG00000014850/ENSMUSG00000015971/ENSMUSG00000017146/ENSMUSG00000018362/ENSMUSG00000020413/ENSMUSG00000021461/ENSMUSG00000021635/ENSMUSG00000021668/ENSMUSG00000021694/ENSMUSG00000022248/ENSMUSG00000022471/ENSMUSG00000022710/ENSMUSG00000024151/ENSMUSG00000024382/ENSMUSG00000024740/ENSMUSG00000025077/ENSMUSG00000025384/…	Top3a/Pias4/Gtf2h1/Rad51c/Msh3/Actr8/Brca1/Kpna2/Hus1/Fancc/Rad17/Polk/Ercc8/Rad1/Xrcc6/Usp7/Msh2/Ercc3/Ddb1/Dclre1a/Faap100/Atrip/Ube2t/Rad51/Chd1l/Fancg/Rpa2/Eya3/Rad51ap1/Blm/Pold3/Brcc3/Cetn2/Cul4a/Usp10/Mre11a/Mlh1/Polq/Neil2/Abraxas1/Mcrs1/Rad9b/Pold1/Rtel1/Pclaf/Aqr/Ino80d/Alkbh5/Trp53bp1/Zfp830/Fancb/Lig4/Ep300/Rad51b/Trp53/Slx1b/Hist1h4c/Mdc1/Hist4h4	59
Reactome	R-MMU-2187338	Visual phototransduction	27/1021	87/7812	9.15157e-06	0.000522211	ENSMUSG00000020599/ENSMUSG00000020890/ENSMUSG00000020907/ENSMUSG00000020936/ENSMUSG00000021123/ENSMUSG00000023979/ENSMUSG00000023982/ENSMUSG00000024575/ENSMUSG00000025386/ENSMUSG00000025743/ENSMUSG00000028125/ENSMUSG00000029064/ENSMUSG00000029491/ENSMUSG00000029510/ENSMUSG00000029663/ENSMUSG00000030324/ENSMUSG00000031450/ENSMUSG00000031789/ENSMUSG00000032192/ENSMUSG00000034837/ENSMUSG00000041534/…	Rgs9/Gucy2e/Rcvrn/Nmt1/Rdh12/Guca1b/Guca1a/Pde6a/Pde6g/Sdc3/Abca4/Gnb1/Pde6b/Gpc2/Gngt1/Rho/Grk1/Cngb1/Gnb5/Gnat1/Rbp3/Gucy2f/Grk4/Rgs9bp/Dhrs3/Cnga1/Cyp4v3	27
Reactome	R-MMU-4615885	SUMOylation of DNA replication proteins	16/1021	39/7812	1.27733e-05	0.000686002	ENSMUSG00000003226/ENSMUSG00000004934/ENSMUSG00000017485/ENSMUSG00000020739/ENSMUSG00000022142/ENSMUSG00000022391/ENSMUSG00000024660/ENSMUSG00000028101/ENSMUSG00000036678/ENSMUSG00000038759/ENSMUSG00000039509/ENSMUSG00000040667/ENSMUSG00000048439/ENSMUSG00000051329/ENSMUSG00000052533/ENSMUSG00000052798	Ranbp2/Pias4/Top2b/Nup85/Nup155/Rangap1/Incenp/Pias3/Aaas/Nup205/Nup133/Nup88/Nupl2/Nup160/Nup188/Nup107	16
Reactome	R-MMU-68877	Mitotic Prometaphase	44/1021	184/7812	3.62644e-05	0.00183941	ENSMUSG00000003226/ENSMUSG00000005233/ENSMUSG00000018707/ENSMUSG00000019971/ENSMUSG00000020492/ENSMUSG00000020739/ENSMUSG00000021051/ENSMUSG00000021270/ENSMUSG00000021693/ENSMUSG00000022314/ENSMUSG00000022391/ENSMUSG00000024660/ENSMUSG00000024974/ENSMUSG00000025228/ENSMUSG00000025758/ENSMUSG00000025862/ENSMUSG00000026504/ENSMUSG00000026605/ENSMUSG00000027115/ENSMUSG00000029177/ENSMUSG00000029790/…	Ranbp2/Spc25/Dync1h1/Cep290/Ska2/Nup85/Ppp2r5e/Hsp90aa1/Kif2a/Rad21/Rangap1/Incenp/Smc3/Actr1a/Plk4/Stag2/Sdccag8/Cenpf/Kif18a/Cenpa/Cep41/Mad2l1/Cetn2/Cenpn/Cep57/Cep63/Ccp110/Smc4/Haus6/Cep250/Cdk5rap2/Nup133/Ofd1/Mis12/Wapl/Haus1/Cep164/Clip1/Nup160/Nup107/Ppp2r5d/Clasp1/Cep152/Fgfr1op	44
Reactome	R-MMU-5620922	BBSome-mediated cargo-targeting to cilium	7/1021	7812-10-01	5.34985e-05	0.00248577	ENSMUSG00000006464/ENSMUSG00000021013/ENSMUSG00000025245/ENSMUSG00000031755/ENSMUSG00000035919/ENSMUSG00000037325/ENSMUSG00000063145	Bbs1/Ttc8/Lztfl1/Bbs2/Bbs9/Bbs7/Bbs5	7
Reactome	R-MMU-5620924	Intraflagellar transport	18/1021	52/7812	5.71755e-05	0.00248577	ENSMUSG00000007867/ENSMUSG00000023004/ENSMUSG00000024253/ENSMUSG00000027475/ENSMUSG00000027778/ENSMUSG00000028576/ENSMUSG00000029469/ENSMUSG00000030323/ENSMUSG00000034292/ENSMUSG00000034848/ENSMUSG00000037890/ENSMUSG00000038564/ENSMUSG00000039715/ENSMUSG00000040040/ENSMUSG00000042050/ENSMUSG00000047193/ENSMUSG00000075271/ENSMUSG00000075273	Ift43/Tuba1b/Dync2li1/Kif3b/Ift80/Ift74/Ift81/Ift122/Traf3ip1/Ttc21b/Wdr19/Ift172/Wdr34/Ift88/Wdr60/Dync2h1/Ttc30a1/Ttc30b	18
Reactome	R-MMU-72187	mRNA 3'-end processing	18/1021	52/7812	5.71755e-05	0.00248577	ENSMUSG00000001017/ENSMUSG00000018379/ENSMUSG00000021134/ENSMUSG00000023118/ENSMUSG00000024097/ENSMUSG00000027079/ENSMUSG00000027176/ENSMUSG00000028809/ENSMUSG00000028911/ENSMUSG00000034274/ENSMUSG00000034820/ENSMUSG00000036572/ENSMUSG00000037475/ENSMUSG00000037993/ENSMUSG00000041328/ENSMUSG00000041815/ENSMUSG00000053536/ENSMUSG00000078676	Chtop/Srsf1/Srsf5/Sympk/Srsf7/Clp1/Cstf3/Srrm1/Srsf4/Thoc5/Cpsf7/Upf3b/Thoc2/Dhx38/Pcf11/Poldip3/Cstf2t/Casc3	18
Reactome	R-MMU-69278	Cell Cycle, Mitotic	85/1021	436/7812	6.57642e-05	0.00272922	ENSMUSG00000000028/ENSMUSG00000003226/ENSMUSG00000005233/ENSMUSG00000014859/ENSMUSG00000018707/ENSMUSG00000019971/ENSMUSG00000020107/ENSMUSG00000020492/ENSMUSG00000020593/ENSMUSG00000020739/ENSMUSG00000020974/ENSMUSG00000021051/ENSMUSG00000021270/ENSMUSG00000021693/ENSMUSG00000021832/ENSMUSG00000022141/ENSMUSG00000022142/ENSMUSG00000022314/ENSMUSG00000022391/ENSMUSG00000023908/ENSMUSG00000024293/…	Cdc45/Ranbp2/Spc25/E2f4/Dync1h1/Cep290/Anapc16/Ska2/Lpin1/Nup85/Pole2/Ppp2r5e/Hsp90aa1/Kif2a/Psmc6/Nipbl/Nup155/Rad21/Rangap1/Pkmyt1/Esco1/Incenp/Smc3/Btrc/Actr1a/Plk4/Stag2/Sdccag8/Blzf1/Cenpf/Mcm10/Optn/Orc4/Kif18a/Mcm8/Aurka/Rpa2/Cenpa/Cdc7/Ankle2/Cep41/Mad2l1/Psmd8/Anapc15/Pold3/Cetn2/Gins4/Rbl2/Orc6/Cenpn/Mau2/Cep57/Gorasp1/Cep63/Ccp110/Smc4/Ncapd3/Aaas/Anapc10/Haus6/Cep250/Pold1/Nup205/Cdk5…	85
Reactome	R-MMU-70171	Glycolysis	19/1021	58/7812	8.47748e-05	0.00336519	ENSMUSG00000000628/ENSMUSG00000003226/ENSMUSG00000011752/ENSMUSG00000020739/ENSMUSG00000021196/ENSMUSG00000022142/ENSMUSG00000026409/ENSMUSG00000030695/ENSMUSG00000032294/ENSMUSG00000036678/ENSMUSG00000038759/ENSMUSG00000039509/ENSMUSG00000040667/ENSMUSG00000048439/ENSMUSG00000051329/ENSMUSG00000052533/ENSMUSG00000052798/ENSMUSG00000062070/ENSMUSG00000063524	Hk2/Ranbp2/Pgam1/Nup85/Pfkp/Nup155/Pfkfb2/Aldoa/Pkm/Aaas/Nup205/Nup133/Nup88/Nupl2/Nup160/Nup188/Nup107/Pgk1/Eno1	19
Reactome	R-MMU-3700989	Transcriptional Regulation by TP53	56/1021	263/7812	0.000112805	0.0042913	ENSMUSG00000000552/ENSMUSG00000002814/ENSMUSG00000003068/ENSMUSG00000003435/ENSMUSG00000006288/ENSMUSG00000006599/ENSMUSG00000011960/ENSMUSG00000017146/ENSMUSG00000020108/ENSMUSG00000020362/ENSMUSG00000020413/ENSMUSG00000020696/ENSMUSG00000021258/ENSMUSG00000021635/ENSMUSG00000021690/ENSMUSG00000022248/ENSMUSG00000022710/ENSMUSG00000024122/ENSMUSG00000024382/ENSMUSG00000025049/ENSMUSG00000025646/…	Zfp385a/Top3a/Stk11/Supt5/Ttc5/Gtf2h1/Ccnt1/Brca1/Ddit4/Cnot6/Hus1/Rffl/Ccnk/Rad17/Jmy/Rad1/Usp7/Pdpk1/Ercc3/Taf5/Atrip/Ing5/Tsc1/Aurka/Lamtor2/Trp53inp1/Dyrk2/Rpa2/Mtor/Mapkapk5/Prkab1/Casp2/Blm/G6pdx/Kat6a/Mre11a/Cnot6l/Supt16/Gadd45a/Cnot1/Ehmt1/Tigar/Prkab2/Sesn1/Rad9b/Taf4/Cdk13/Slc38a9/Taf7/Taf4b/Mdm4/Ep300/Cnot10/Trp53/Gtf2f2/Mta2	56
Reactome	R-MMU-5620920	Cargo trafficking to the periciliary membrane	14/1021	37/7812	0.000127452	0.00465454	ENSMUSG00000006464/ENSMUSG00000021013/ENSMUSG00000022911/ENSMUSG00000025035/ENSMUSG00000025224/ENSMUSG00000025245/ENSMUSG00000026239/ENSMUSG00000030324/ENSMUSG00000030897/ENSMUSG00000031755/ENSMUSG00000031789/ENSMUSG00000035919/ENSMUSG00000037325/ENSMUSG00000063145	Bbs1/Ttc8/Arl13b/Arl3/Gbf1/Lztfl1/Pde6d/Rho/Cnga4/Bbs2/Cngb1/Bbs9/Bbs7/Bbs5	14
Reactome	R-MMU-68886	M Phase	64/1021	316/7812	0.000174967	0.00589394	ENSMUSG00000003226/ENSMUSG00000005233/ENSMUSG00000018707/ENSMUSG00000019971/ENSMUSG00000020107/ENSMUSG00000020492/ENSMUSG00000020593/ENSMUSG00000020739/ENSMUSG00000021051/ENSMUSG00000021270/ENSMUSG00000021693/ENSMUSG00000021832/ENSMUSG00000022141/ENSMUSG00000022142/ENSMUSG00000022314/ENSMUSG00000022391/ENSMUSG00000024660/ENSMUSG00000024974/ENSMUSG00000025228/ENSMUSG00000025758/ENSMUSG00000025862/…	Ranbp2/Spc25/Dync1h1/Cep290/Anapc16/Ska2/Lpin1/Nup85/Ppp2r5e/Hsp90aa1/Kif2a/Psmc6/Nipbl/Nup155/Rad21/Rangap1/Incenp/Smc3/Actr1a/Plk4/Stag2/Sdccag8/Blzf1/Cenpf/Kif18a/Cenpa/Ankle2/Cep41/Mad2l1/Psmd8/Anapc15/Cetn2/Cenpn/Mau2/Cep57/Gorasp1/Cep63/Ccp110/Smc4/Ncapd3/Aaas/Anapc10/Haus6/Cep250/Nup205/Cdk5rap2/Nup133/Ofd1/Mis12/Nup88/Wapl/Haus1/Cep164/Nupl2/Clip1/Nup160/Nup188/Nup107/Ppp2r5d/Hist1h4c/Cla…	64
Reactome	R-MMU-5685942	HDR through Homologous Recombination (HRR)	19/1021	61/7812	0.000180797	0.00589394	ENSMUSG00000002814/ENSMUSG00000007646/ENSMUSG00000017146/ENSMUSG00000020413/ENSMUSG00000021635/ENSMUSG00000021668/ENSMUSG00000022248/ENSMUSG00000025646/ENSMUSG00000027323/ENSMUSG00000028884/ENSMUSG00000030346/ENSMUSG00000030528/ENSMUSG00000030726/ENSMUSG00000031928/ENSMUSG00000038569/ENSMUSG00000038644/ENSMUSG00000038685/ENSMUSG00000059060/ENSMUSG00000059772	Top3a/Rad51c/Brca1/Hus1/Rad17/Polk/Rad1/Atrip/Rad51/Rpa2/Rad51ap1/Blm/Pold3/Mre11a/Rad9b/Pold1/Rtel1/Rad51b/Slx1b	19
Reactome	R-MMU-2565942	Regulation of PLK1 Activity at G2/M Transition	24/1021	86/7812	0.000185678	0.00589394	ENSMUSG00000018707/ENSMUSG00000019971/ENSMUSG00000021270/ENSMUSG00000025217/ENSMUSG00000025228/ENSMUSG00000025758/ENSMUSG00000026504/ENSMUSG00000026672/ENSMUSG00000027496/ENSMUSG00000029790/ENSMUSG00000031347/ENSMUSG00000031922/ENSMUSG00000032534/ENSMUSG00000033904/ENSMUSG00000038047/ENSMUSG00000038241/ENSMUSG00000039298/ENSMUSG00000040586/ENSMUSG00000041840/ENSMUSG00000043987/ENSMUSG00000064302/…	Dync1h1/Cep290/Hsp90aa1/Btrc/Actr1a/Plk4/Sdccag8/Optn/Aurka/Cep41/Cetn2/Cep57/Cep63/Ccp110/Haus6/Cep250/Cdk5rap2/Ofd1/Haus1/Cep164/Clasp1/Cep152/Fgfr1op/Ppp1r12b	24
Reactome	R-MMU-8854518	AURKA Activation by TPX2	21/1021	71/7812	0.000190852	0.00589394	ENSMUSG00000018707/ENSMUSG00000019971/ENSMUSG00000021270/ENSMUSG00000025228/ENSMUSG00000025758/ENSMUSG00000026504/ENSMUSG00000027496/ENSMUSG00000029790/ENSMUSG00000031347/ENSMUSG00000031922/ENSMUSG00000032534/ENSMUSG00000033904/ENSMUSG00000038047/ENSMUSG00000038241/ENSMUSG00000039298/ENSMUSG00000040586/ENSMUSG00000041840/ENSMUSG00000043987/ENSMUSG00000064302/ENSMUSG00000068394/ENSMUSG00000069135	Dync1h1/Cep290/Hsp90aa1/Actr1a/Plk4/Sdccag8/Aurka/Cep41/Cetn2/Cep57/Cep63/Ccp110/Haus6/Cep250/Cdk5rap2/Ofd1/Haus1/Cep164/Clasp1/Cep152/Fgfr1op	21
Reactome	R-MMU-5633007	Regulation of TP53 Activity	36/1021	151/7812	0.000193667	0.00589394	ENSMUSG00000000552/ENSMUSG00000002814/ENSMUSG00000003068/ENSMUSG00000006288/ENSMUSG00000017146/ENSMUSG00000020413/ENSMUSG00000020696/ENSMUSG00000021635/ENSMUSG00000021690/ENSMUSG00000022248/ENSMUSG00000022710/ENSMUSG00000024122/ENSMUSG00000025049/ENSMUSG00000025646/ENSMUSG00000026283/ENSMUSG00000027496/ENSMUSG00000028211/ENSMUSG00000028630/ENSMUSG00000028884/ENSMUSG00000028991/ENSMUSG00000029454/…	Zfp385a/Top3a/Stk11/Ttc5/Brca1/Hus1/Rffl/Rad17/Jmy/Rad1/Usp7/Pdpk1/Taf5/Atrip/Ing5/Aurka/Trp53inp1/Dyrk2/Rpa2/Mtor/Mapkapk5/Prkab1/Blm/Kat6a/Mre11a/Supt16/Ehmt1/Prkab2/Rad9b/Taf4/Taf7/Taf4b/Mdm4/Ep300/Trp53/Mta2	36
Reactome	R-MMU-5693532	DNA Double-Strand Break Repair	32/1021	131/7812	0.000270439	0.00796488	ENSMUSG00000002814/ENSMUSG00000004934/ENSMUSG00000007646/ENSMUSG00000017146/ENSMUSG00000018362/ENSMUSG00000020413/ENSMUSG00000021635/ENSMUSG00000021668/ENSMUSG00000022248/ENSMUSG00000022471/ENSMUSG00000025646/ENSMUSG00000027323/ENSMUSG00000028884/ENSMUSG00000028886/ENSMUSG00000030346/ENSMUSG00000030528/ENSMUSG00000030726/ENSMUSG00000031201/ENSMUSG00000031928/ENSMUSG00000034206/ENSMUSG00000035234/…	Top3a/Pias4/Rad51c/Brca1/Kpna2/Hus1/Rad17/Polk/Rad1/Xrcc6/Atrip/Rad51/Rpa2/Eya3/Rad51ap1/Blm/Pold3/Brcc3/Mre11a/Polq/Abraxas1/Rad9b/Pold1/Rtel1/Trp53bp1/Lig4/Rad51b/Trp53/Slx1b/Hist1h4c/Mdc1/Hist4h4	32
Reactome	R-MMU-380259	Loss of Nlp from mitotic centrosomes	20/1021	68/7812	0.000292813	0.00810116	ENSMUSG00000018707/ENSMUSG00000019971/ENSMUSG00000021270/ENSMUSG00000025228/ENSMUSG00000025758/ENSMUSG00000026504/ENSMUSG00000029790/ENSMUSG00000031347/ENSMUSG00000031922/ENSMUSG00000032534/ENSMUSG00000033904/ENSMUSG00000038047/ENSMUSG00000038241/ENSMUSG00000039298/ENSMUSG00000040586/ENSMUSG00000041840/ENSMUSG00000043987/ENSMUSG00000064302/ENSMUSG00000068394/ENSMUSG00000069135	Dync1h1/Cep290/Hsp90aa1/Actr1a/Plk4/Sdccag8/Cep41/Cetn2/Cep57/Cep63/Ccp110/Haus6/Cep250/Cdk5rap2/Ofd1/Haus1/Cep164/Clasp1/Cep152/Fgfr1op	20
Reactome	R-MMU-380284	Loss of proteins required for interphase microtubule organizationÂ from the centrosome	20/1021	68/7812	0.000292813	0.00810116	ENSMUSG00000018707/ENSMUSG00000019971/ENSMUSG00000021270/ENSMUSG00000025228/ENSMUSG00000025758/ENSMUSG00000026504/ENSMUSG00000029790/ENSMUSG00000031347/ENSMUSG00000031922/ENSMUSG00000032534/ENSMUSG00000033904/ENSMUSG00000038047/ENSMUSG00000038241/ENSMUSG00000039298/ENSMUSG00000040586/ENSMUSG00000041840/ENSMUSG00000043987/ENSMUSG00000064302/ENSMUSG00000068394/ENSMUSG00000069135	Dync1h1/Cep290/Hsp90aa1/Actr1a/Plk4/Sdccag8/Cep41/Cetn2/Cep57/Cep63/Ccp110/Haus6/Cep250/Cdk5rap2/Ofd1/Haus1/Cep164/Clasp1/Cep152/Fgfr1op	20
Reactome	R-MMU-170822	Regulation of Glucokinase by Glucokinase Regulatory Protein	11/1021	27/7812	0.000317829	0.00853465	ENSMUSG00000003226/ENSMUSG00000020739/ENSMUSG00000022142/ENSMUSG00000036678/ENSMUSG00000038759/ENSMUSG00000039509/ENSMUSG00000040667/ENSMUSG00000048439/ENSMUSG00000051329/ENSMUSG00000052533/ENSMUSG00000052798	Ranbp2/Nup85/Nup155/Aaas/Nup205/Nup133/Nup88/Nupl2/Nup160/Nup188/Nup107	11
Reactome	R-MMU-674695	RNA Polymerase II Pre-transcription Events	21/1021	74/7812	0.000358944	0.00936332	ENSMUSG00000002052/ENSMUSG00000003435/ENSMUSG00000005609/ENSMUSG00000006599/ENSMUSG00000011960/ENSMUSG00000021258/ENSMUSG00000021890/ENSMUSG00000022828/ENSMUSG00000024382/ENSMUSG00000024384/ENSMUSG00000025049/ENSMUSG00000026361/ENSMUSG00000028496/ENSMUSG00000033543/ENSMUSG00000035726/ENSMUSG00000039117/ENSMUSG00000042487/ENSMUSG00000051316/ENSMUSG00000054321/ENSMUSG00000061559/ENSMUSG00000067995	Supt6/Supt5/Ctr9/Gtf2h1/Ccnt1/Ccnk/Eaf1/Gtf2e1/Ercc3/Iws1/Taf5/Cdc73/Mllt3/Gtf2a2/Supt16/Taf4/Leo1/Taf7/Taf4b/Wdr61/Gtf2f2	21
Reactome	R-MMU-6804756	Regulation of TP53 Activity through Phosphorylation	24/1021	91/7812	0.000468413	0.0118795	ENSMUSG00000002814/ENSMUSG00000003068/ENSMUSG00000017146/ENSMUSG00000020413/ENSMUSG00000021635/ENSMUSG00000022248/ENSMUSG00000025049/ENSMUSG00000025646/ENSMUSG00000027496/ENSMUSG00000028211/ENSMUSG00000028630/ENSMUSG00000028884/ENSMUSG00000029454/ENSMUSG00000029513/ENSMUSG00000030528/ENSMUSG00000031928/ENSMUSG00000035726/ENSMUSG00000038205/ENSMUSG00000038569/ENSMUSG00000039117/ENSMUSG00000051316/…	Top3a/Stk11/Brca1/Hus1/Rad17/Rad1/Taf5/Atrip/Aurka/Trp53inp1/Dyrk2/Rpa2/Mapkapk5/Prkab1/Blm/Mre11a/Supt16/Prkab2/Rad9b/Taf4/Taf7/Taf4b/Mdm4/Trp53	24
Reactome	R-MMU-70326	Glucose metabolism	21/1021	76/7812	0.000532687	0.0130069	ENSMUSG00000000628/ENSMUSG00000003226/ENSMUSG00000011752/ENSMUSG00000019179/ENSMUSG00000020739/ENSMUSG00000021196/ENSMUSG00000022142/ENSMUSG00000025792/ENSMUSG00000026409/ENSMUSG00000030695/ENSMUSG00000032294/ENSMUSG00000036678/ENSMUSG00000038759/ENSMUSG00000039509/ENSMUSG00000040667/ENSMUSG00000048439/ENSMUSG00000051329/ENSMUSG00000052533/ENSMUSG00000052798/ENSMUSG00000062070/ENSMUSG00000063524	Hk2/Ranbp2/Pgam1/Mdh2/Nup85/Pfkp/Nup155/Slc25a10/Pfkfb2/Aldoa/Pkm/Aaas/Nup205/Nup133/Nup88/Nupl2/Nup160/Nup188/Nup107/Pgk1/Eno1	21
Reactome	R-MMU-109688	Cleavage of Growing Transcript in the Termination Region	18/1021	61/7812	0.000555606	0.0130069	ENSMUSG00000001017/ENSMUSG00000018379/ENSMUSG00000021134/ENSMUSG00000023118/ENSMUSG00000024097/ENSMUSG00000027079/ENSMUSG00000027176/ENSMUSG00000028809/ENSMUSG00000028911/ENSMUSG00000034274/ENSMUSG00000034820/ENSMUSG00000036572/ENSMUSG00000037475/ENSMUSG00000037993/ENSMUSG00000041328/ENSMUSG00000041815/ENSMUSG00000053536/ENSMUSG00000078676	Chtop/Srsf1/Srsf5/Sympk/Srsf7/Clp1/Cstf3/Srrm1/Srsf4/Thoc5/Cpsf7/Upf3b/Thoc2/Dhx38/Pcf11/Poldip3/Cstf2t/Casc3	18
Reactome	R-MMU-73856	RNA Polymerase II Transcription Termination	18/1021	61/7812	0.000555606	0.0130069	ENSMUSG00000001017/ENSMUSG00000018379/ENSMUSG00000021134/ENSMUSG00000023118/ENSMUSG00000024097/ENSMUSG00000027079/ENSMUSG00000027176/ENSMUSG00000028809/ENSMUSG00000028911/ENSMUSG00000034274/ENSMUSG00000034820/ENSMUSG00000036572/ENSMUSG00000037475/ENSMUSG00000037993/ENSMUSG00000041328/ENSMUSG00000041815/ENSMUSG00000053536/ENSMUSG00000078676	Chtop/Srsf1/Srsf5/Sympk/Srsf7/Clp1/Cstf3/Srrm1/Srsf4/Thoc5/Cpsf7/Upf3b/Thoc2/Dhx38/Pcf11/Poldip3/Cstf2t/Casc3	18
Reactome	R-MMU-5693579	Homologous DNA Pairing and Strand Exchange	14/1021	42/7812	0.000586687	0.0133911	ENSMUSG00000002814/ENSMUSG00000007646/ENSMUSG00000017146/ENSMUSG00000020413/ENSMUSG00000021635/ENSMUSG00000022248/ENSMUSG00000025646/ENSMUSG00000027323/ENSMUSG00000028884/ENSMUSG00000030346/ENSMUSG00000030528/ENSMUSG00000031928/ENSMUSG00000038569/ENSMUSG00000059060	Top3a/Rad51c/Brca1/Hus1/Rad17/Rad1/Atrip/Rad51/Rpa2/Rad51ap1/Blm/Mre11a/Rad9b/Rad51b	14
Reactome	R-MMU-2470946	Cohesin Loading onto Chromatin	6/1021	7812-10-01	0.000645351	0.0143016	ENSMUSG00000022141/ENSMUSG00000022314/ENSMUSG00000024974/ENSMUSG00000025862/ENSMUSG00000031858/ENSMUSG00000041408	Nipbl/Rad21/Smc3/Stag2/Mau2/Wapl	6
Reactome	R-MMU-4570464	SUMOylation of RNA binding proteins	11/1021	29/7812	0.000657907	0.0143016	ENSMUSG00000003226/ENSMUSG00000020739/ENSMUSG00000022142/ENSMUSG00000036678/ENSMUSG00000038759/ENSMUSG00000039509/ENSMUSG00000040667/ENSMUSG00000048439/ENSMUSG00000051329/ENSMUSG00000052533/ENSMUSG00000052798	Ranbp2/Nup85/Nup155/Aaas/Nup205/Nup133/Nup88/Nupl2/Nup160/Nup188/Nup107	11
Reactome	R-MMU-5693616	Presynaptic phase of homologous DNA pairing and strand exchange	13/1021	39/7812	0.000915438	0.0190423	ENSMUSG00000002814/ENSMUSG00000007646/ENSMUSG00000017146/ENSMUSG00000020413/ENSMUSG00000021635/ENSMUSG00000022248/ENSMUSG00000025646/ENSMUSG00000027323/ENSMUSG00000028884/ENSMUSG00000030528/ENSMUSG00000031928/ENSMUSG00000038569/ENSMUSG00000059060	Top3a/Rad51c/Brca1/Hus1/Rad17/Rad1/Atrip/Rad51/Rpa2/Blm/Mre11a/Rad9b/Rad51b	13
Reactome	R-MMU-3301854	Nuclear Pore Complex (NPC) Disassembly	11/1021	30/7812	0.000917702	0.0190423	ENSMUSG00000003226/ENSMUSG00000020739/ENSMUSG00000022142/ENSMUSG00000036678/ENSMUSG00000038759/ENSMUSG00000039509/ENSMUSG00000040667/ENSMUSG00000048439/ENSMUSG00000051329/ENSMUSG00000052533/ENSMUSG00000052798	Ranbp2/Nup85/Nup155/Aaas/Nup205/Nup133/Nup88/Nupl2/Nup160/Nup188/Nup107	11
Reactome	R-MMU-4551638	SUMOylation of chromatin organization proteins	17/1021	59/7812	0.001057	0.0214454	ENSMUSG00000003226/ENSMUSG00000017548/ENSMUSG00000020739/ENSMUSG00000022142/ENSMUSG00000026739/ENSMUSG00000032405/ENSMUSG00000036678/ENSMUSG00000038759/ENSMUSG00000039509/ENSMUSG00000040667/ENSMUSG00000040669/ENSMUSG00000048439/ENSMUSG00000051329/ENSMUSG00000052533/ENSMUSG00000052798/ENSMUSG00000060678/ENSMUSG00000096010	Ranbp2/Suz12/Nup85/Nup155/Bmi1/Pias1/Aaas/Nup205/Nup133/Nup88/Phc1/Nupl2/Nup160/Nup188/Nup107/Hist1h4c/Hist4h4	17
Reactome	R-MMU-69620	Cell Cycle Checkpoints	53/1021	268/7812	0.00110518	0.0219354	ENSMUSG00000000028/ENSMUSG00000000552/ENSMUSG00000002814/ENSMUSG00000003226/ENSMUSG00000004934/ENSMUSG00000005233/ENSMUSG00000017146/ENSMUSG00000018707/ENSMUSG00000020107/ENSMUSG00000020413/ENSMUSG00000020492/ENSMUSG00000020739/ENSMUSG00000021051/ENSMUSG00000021635/ENSMUSG00000021693/ENSMUSG00000021832/ENSMUSG00000022248/ENSMUSG00000022391/ENSMUSG00000023908/ENSMUSG00000024660/ENSMUSG00000025646/…	Cdc45/Zfp385a/Top3a/Ranbp2/Pias4/Spc25/Brca1/Dync1h1/Anapc16/Hus1/Ska2/Nup85/Ppp2r5e/Rad17/Kif2a/Psmc6/Rad1/Rangap1/Pkmyt1/Incenp/Atrip/Cenpf/Mcm10/Orc4/Kif18a/Mcm8/Rpa2/Cenpa/Cdc7/Mad2l1/Blm/Psmd8/Anapc15/Brcc3/Orc6/Cenpn/Mre11a/Abraxas1/Anapc10/Rad9b/Nup133/Mis12/Trp53bp1/Clip1/Nup160/Nup107/Mdm4/Ppp2r5d/Trp53/Hist1h4c/Mdc1/Clasp1/Hist4h4	53
Reactome	R-MMU-211000	Gene Silencing by RNA	20/1021	75/7812	0.00116735	0.0226763	ENSMUSG00000003226/ENSMUSG00000016559/ENSMUSG00000020739/ENSMUSG00000022142/ENSMUSG00000023051/ENSMUSG00000028842/ENSMUSG00000036678/ENSMUSG00000036698/ENSMUSG00000038759/ENSMUSG00000039509/ENSMUSG00000040029/ENSMUSG00000040667/ENSMUSG00000041415/ENSMUSG00000047888/ENSMUSG00000048439/ENSMUSG00000051329/ENSMUSG00000052533/ENSMUSG00000052798/ENSMUSG00000060678/ENSMUSG00000096010	Ranbp2/H3f3b/Nup85/Nup155/Tarbp2/Ago3/Aaas/Ago2/Nup205/Nup133/Ipo8/Nup88/Dicer1/Tnrc6b/Nupl2/Nup160/Nup188/Nup107/Hist1h4c/Hist4h4	20
Reactome	R-MMU-380270	Recruitment of mitotic centrosome proteins and complexes	20/1021	76/7812	0.00139401	0.0259741	ENSMUSG00000018707/ENSMUSG00000019971/ENSMUSG00000021270/ENSMUSG00000025228/ENSMUSG00000025758/ENSMUSG00000026504/ENSMUSG00000029790/ENSMUSG00000031347/ENSMUSG00000031922/ENSMUSG00000032534/ENSMUSG00000033904/ENSMUSG00000038047/ENSMUSG00000038241/ENSMUSG00000039298/ENSMUSG00000040586/ENSMUSG00000041840/ENSMUSG00000043987/ENSMUSG00000064302/ENSMUSG00000068394/ENSMUSG00000069135	Dync1h1/Cep290/Hsp90aa1/Actr1a/Plk4/Sdccag8/Cep41/Cetn2/Cep57/Cep63/Ccp110/Haus6/Cep250/Cdk5rap2/Ofd1/Haus1/Cep164/Clasp1/Cep152/Fgfr1op	20
Reactome	R-MMU-380287	Centrosome maturation	20/1021	76/7812	0.00139401	0.0259741	ENSMUSG00000018707/ENSMUSG00000019971/ENSMUSG00000021270/ENSMUSG00000025228/ENSMUSG00000025758/ENSMUSG00000026504/ENSMUSG00000029790/ENSMUSG00000031347/ENSMUSG00000031922/ENSMUSG00000032534/ENSMUSG00000033904/ENSMUSG00000038047/ENSMUSG00000038241/ENSMUSG00000039298/ENSMUSG00000040586/ENSMUSG00000041840/ENSMUSG00000043987/ENSMUSG00000064302/ENSMUSG00000068394/ENSMUSG00000069135	Dync1h1/Cep290/Hsp90aa1/Actr1a/Plk4/Sdccag8/Cep41/Cetn2/Cep57/Cep63/Ccp110/Haus6/Cep250/Cdk5rap2/Ofd1/Haus1/Cep164/Clasp1/Cep152/Fgfr1op	20
Reactome	R-MMU-380320	Recruitment of NuMA to mitotic centrosomes	20/1021	77/7812	0.00165712	0.0302591	ENSMUSG00000018707/ENSMUSG00000019971/ENSMUSG00000021270/ENSMUSG00000025228/ENSMUSG00000025758/ENSMUSG00000026504/ENSMUSG00000029790/ENSMUSG00000031347/ENSMUSG00000031922/ENSMUSG00000032534/ENSMUSG00000033904/ENSMUSG00000038047/ENSMUSG00000038241/ENSMUSG00000039298/ENSMUSG00000040586/ENSMUSG00000041840/ENSMUSG00000043987/ENSMUSG00000064302/ENSMUSG00000068394/ENSMUSG00000069135	Dync1h1/Cep290/Hsp90aa1/Actr1a/Plk4/Sdccag8/Cep41/Cetn2/Cep57/Cep63/Ccp110/Haus6/Cep250/Cdk5rap2/Ofd1/Haus1/Cep164/Clasp1/Cep152/Fgfr1op	20
Reactome	R-MMU-176187	Activation of ATR in response to replication stress	12/1021	37/7812	0.00187082	0.0334914	ENSMUSG00000000028/ENSMUSG00000020413/ENSMUSG00000021635/ENSMUSG00000022248/ENSMUSG00000025646/ENSMUSG00000026669/ENSMUSG00000026761/ENSMUSG00000027353/ENSMUSG00000028884/ENSMUSG00000029283/ENSMUSG00000031697/ENSMUSG00000038569	Cdc45/Hus1/Rad17/Rad1/Atrip/Mcm10/Orc4/Mcm8/Rpa2/Cdc7/Orc6/Rad9b	12
Reactome	R-MMU-508751	Circadian Clock	10/1021	28/7812	0.00196824	0.0345578	ENSMUSG00000020038/ENSMUSG00000020538/ENSMUSG00000022124/ENSMUSG00000022383/ENSMUSG00000025217/ENSMUSG00000029167/ENSMUSG00000029238/ENSMUSG00000032238/ENSMUSG00000055024/ENSMUSG00000055116	Cry1/Srebf1/Fbxl3/Ppara/Btrc/Ppargc1a/Clock/Rora/Ep300/Arntl	10
Reactome	R-MMU-5693538	Homology Directed Repair	20/1021	79/7812	0.00231122	0.0398141	ENSMUSG00000002814/ENSMUSG00000007646/ENSMUSG00000017146/ENSMUSG00000020413/ENSMUSG00000021635/ENSMUSG00000021668/ENSMUSG00000022248/ENSMUSG00000025646/ENSMUSG00000027323/ENSMUSG00000028884/ENSMUSG00000030346/ENSMUSG00000030528/ENSMUSG00000030726/ENSMUSG00000031928/ENSMUSG00000034206/ENSMUSG00000038569/ENSMUSG00000038644/ENSMUSG00000038685/ENSMUSG00000059060/ENSMUSG00000059772	Top3a/Rad51c/Brca1/Hus1/Rad17/Polk/Rad1/Atrip/Rad51/Rpa2/Rad51ap1/Blm/Pold3/Mre11a/Polq/Rad9b/Pold1/Rtel1/Rad51b/Slx1b	20
Reactome	R-MMU-5693567	HDR through Homologous Recombination (HR) or Single Strand Annealing (SSA)	19/1021	74/7812	0.00247416	0.0410623	ENSMUSG00000002814/ENSMUSG00000007646/ENSMUSG00000017146/ENSMUSG00000020413/ENSMUSG00000021635/ENSMUSG00000021668/ENSMUSG00000022248/ENSMUSG00000025646/ENSMUSG00000027323/ENSMUSG00000028884/ENSMUSG00000030346/ENSMUSG00000030528/ENSMUSG00000030726/ENSMUSG00000031928/ENSMUSG00000038569/ENSMUSG00000038644/ENSMUSG00000038685/ENSMUSG00000059060/ENSMUSG00000059772	Top3a/Rad51c/Brca1/Hus1/Rad17/Polk/Rad1/Atrip/Rad51/Rpa2/Rad51ap1/Blm/Pold3/Mre11a/Rad9b/Pold1/Rtel1/Rad51b/Slx1b	19
Reactome	R-MMU-191859	snRNP Assembly	14/1021	48/7812	0.0025186	0.0410623	ENSMUSG00000003226/ENSMUSG00000008301/ENSMUSG00000020739/ENSMUSG00000022142/ENSMUSG00000027905/ENSMUSG00000036678/ENSMUSG00000038759/ENSMUSG00000039509/ENSMUSG00000040667/ENSMUSG00000048439/ENSMUSG00000051329/ENSMUSG00000052533/ENSMUSG00000052798/ENSMUSG00000055760	Ranbp2/Phax/Nup85/Nup155/Ddx20/Aaas/Nup205/Nup133/Nup88/Nupl2/Nup160/Nup188/Nup107/Gemin6	14
Reactome	R-MMU-194441	Metabolism of non-coding RNA	14/1021	48/7812	0.0025186	0.0410623	ENSMUSG00000003226/ENSMUSG00000008301/ENSMUSG00000020739/ENSMUSG00000022142/ENSMUSG00000027905/ENSMUSG00000036678/ENSMUSG00000038759/ENSMUSG00000039509/ENSMUSG00000040667/ENSMUSG00000048439/ENSMUSG00000051329/ENSMUSG00000052533/ENSMUSG00000052798/ENSMUSG00000055760	Ranbp2/Phax/Nup85/Nup155/Ddx20/Aaas/Nup205/Nup133/Nup88/Nupl2/Nup160/Nup188/Nup107/Gemin6	14
Reactome	R-MMU-2500257	Resolution of Sister Chromatid Cohesion	25/1021	108/7812	0.00271191	0.0434382	ENSMUSG00000003226/ENSMUSG00000005233/ENSMUSG00000018707/ENSMUSG00000020492/ENSMUSG00000020739/ENSMUSG00000021051/ENSMUSG00000021693/ENSMUSG00000022314/ENSMUSG00000022391/ENSMUSG00000024660/ENSMUSG00000024974/ENSMUSG00000025862/ENSMUSG00000026605/ENSMUSG00000027115/ENSMUSG00000029177/ENSMUSG00000029910/ENSMUSG00000031756/ENSMUSG00000039509/ENSMUSG00000040599/ENSMUSG00000041408/ENSMUSG00000049550/…	Ranbp2/Spc25/Dync1h1/Ska2/Nup85/Ppp2r5e/Kif2a/Rad21/Rangap1/Incenp/Smc3/Stag2/Cenpf/Kif18a/Cenpa/Mad2l1/Cenpn/Nup133/Mis12/Wapl/Clip1/Nup160/Nup107/Ppp2r5d/Clasp1	25
Reactome	R-MMU-112382	Formation of RNA Pol II elongation complex	15/1021	54/7812	0.00303583	0.0469782	ENSMUSG00000002052/ENSMUSG00000003435/ENSMUSG00000005609/ENSMUSG00000006599/ENSMUSG00000011960/ENSMUSG00000021258/ENSMUSG00000021890/ENSMUSG00000024382/ENSMUSG00000024384/ENSMUSG00000026361/ENSMUSG00000028496/ENSMUSG00000035726/ENSMUSG00000042487/ENSMUSG00000061559/ENSMUSG00000067995	Supt6/Supt5/Ctr9/Gtf2h1/Ccnt1/Ccnk/Eaf1/Ercc3/Iws1/Cdc73/Mllt3/Supt16/Leo1/Wdr61/Gtf2f2	15
Reactome	R-MMU-75955	RNA Polymerase II Transcription Elongation	15/1021	54/7812	0.00303583	0.0469782	ENSMUSG00000002052/ENSMUSG00000003435/ENSMUSG00000005609/ENSMUSG00000006599/ENSMUSG00000011960/ENSMUSG00000021258/ENSMUSG00000021890/ENSMUSG00000024382/ENSMUSG00000024384/ENSMUSG00000026361/ENSMUSG00000028496/ENSMUSG00000035726/ENSMUSG00000042487/ENSMUSG00000061559/ENSMUSG00000067995	Supt6/Supt5/Ctr9/Gtf2h1/Ccnt1/Ccnk/Eaf1/Ercc3/Iws1/Cdc73/Mllt3/Supt16/Leo1/Wdr61/Gtf2f2	15
