# Supplementary material for: Homeostatic plasticity in the retina is associated with maintenance of night vision during retinal degenerative disease
Source: eLife. 2020 Sep 22;9:e59422. doi: 10.7554/eLife.59422 (PMC7529457; doi:10.7554/eLife.59422)
Supplement: Supplementary file 11. [file elife-59422-supp11.xlsx]

## Sheet: P23HvsWT_DEG_down
gene_id	P23H_11	P23H_13	P23H_6	P23H_8	WT_12	WT_7	WT_9	log2foldchange	pvalue	padjust	gene_name	gene_chr	gene_start	gene_end	gene_strand	gene_length	gene_biotype	gene_description	tf_family	P23H_11_readcount	P23H_13_readcount	P23H_6_readcount	P23H_8_readcount	WT_12_readcount	WT_7_readcount	WT_9_readcount	P23H_11_fpkm	P23H_13_fpkm	P23H_6_fpkm	P23H_8_fpkm	WT_12_fpkm	WT_7_fpkm	WT_9_fpkm
ENSMUSG00000031966	48.407	60.9151	32.6912	37.6778	593.81	501.409	418.989	-3.01018	2.10585e-63	4.74369e-60	Glb1l3	9	26817953	26860890	-	2618	protein_coding	galactosidase, beta 1 like 3 [Source:MGI Symbol;Acc:MGI:1918143]	-	42	66	33	42	621	478	414	1.89346	2.51507	1.41458	1.54533	22.4842	18.9852	15.4597
ENSMUSG00000086421	13.8306	29.5346	15.8503	17.9418	211.324	198.256	187.229	-2.70538	2.34178e-40	2.34452e-37	Gm14091	2	118829874	118834122	-	874	antisense	predicted gene 14091 [Source:MGI Symbol;Acc:MGI:3650488]	-	12	32	16	20	221	189	185	0.93342	2.104	1.18338	1.26967	13.806	12.9521	11.9196
ENSMUSG00000089890	58.7799	74.7594	39.6256	52.9283	380.574	421.687	263.133	-2.22572	3.79728e-31	2.63195e-28	Gm16055	6	8354056	8364136	-	626	antisense	predicted gene 16055 [Source:MGI Symbol;Acc:MGI:3801818]	-	51	81	40	59	398	402	260	5.53864	7.43564	4.13048	5.22939	34.7132	38.4627	23.3884
ENSMUSG00000027331	48.407	28.6116	45.5695	57.4138	193.156	300.006	225.687	-1.9768	8.56335e-23	2.572e-20	Knstrn	2	118814003	118853957	+	5158	protein_coding	kinetochore-localized astrin/SPAG5 binding [Source:MGI Symbol;Acc:MGI:1289298]	-	42	31	46	64	202	286	223	2.4055	1.50079	2.50508	2.99159	9.29152	14.4312	10.5793
ENSMUSG00000079465	269.696	187.36	127.793	217.096	855.813	854.913	1071.76	-1.93987	2.46512e-29	1.4808e-26	Col4a3	1	82586921	82722059	+	9967	protein_coding	collagen, type IV, alpha 3 [Source:MGI Symbol;Acc:MGI:104688]	-	234	203	129	242	895	815	1059	5.47241	4.01291	2.86853	4.61896	16.8099	16.7919	20.5141
ENSMUSG00000084913	41.4917	35.9953	39.6256	45.7516	157.776	172.032	150.796	-1.69869	7.32752e-21	1.71493e-18	Gm7616	9	59951285	59959044	+	624	antisense	predicted gene 7616 [Source:MGI Symbol;Acc:MGI:3647735]	-	36	39	40	51	165	164	149	3.92216	3.5916	4.14372	4.53481	14.4373	15.7416	13.4463
ENSMUSG00000086306	97.9665	115.369	53.4946	69.9731	357.625	375.532	288.434	-1.69432	1.21696e-18	2.19515e-16	Gm11754	11	119106328	119111425	-	661	lincRNA	predicted gene 11754 [Source:MGI Symbol;Acc:MGI:3651697]	-	85	125	54	78	374	358	285	8.74228	10.8672	5.2809	6.54737	30.8927	32.4392	24.2798
ENSMUSG00000030470	14.9831	14.7673	17.8315	21.5302	89.8843	74.4771	77.9279	-1.66324	1.70944e-13	1.53263e-11	Csrp3	7	48830398	48848033	-	2671	protein_coding	cysteine and glycine-rich protein 3 [Source:MGI Symbol;Acc:MGI:1330824]	-	13	16	18	24	94	71	77	0.7739	0.805122	1.01888	1.16605	4.49416	3.72375	3.79688
ENSMUSG00000027699	26.5086	22.1509	17.8315	20.6331	80.3221	114.338	91.0845	-1.63966	8.90583e-14	8.50313e-12	Ect2	3	27097222	27153878	-	5386	protein_coding	ect2 oncogene [Source:MGI Symbol;Acc:MGI:95281]	-	23	24	18	23	84	109	90	0.864364	0.762396	0.643205	0.705444	2.53529	3.60891	2.8016
ENSMUSG00000102887	0	0.922955	0	0	21.993	28.3223	21.2531	-1.61604	2.44703e-10	1.2457e-08	Gm10857	2	6132869	6140568	+	2794	lincRNA	predicted gene 10857 [Source:MGI Symbol;Acc:MGI:3641733]	-	0	1	0	0	23	27	21	0	0.0208435	0	0	0.455488	0.586564	0.428928
ENSMUSG00000027360	470.239	402.409	218.932	322.055	1112.08	1240.94	1285.3	-1.56276	1.04251e-19	2.11091e-17	Hdc	2	126593667	126619299	-	6389	protein_coding	histidine decarboxylase [Source:MGI Symbol;Acc:MGI:96062]	-	408	436	221	359	1163	1183	1270	16.54	14.9404	8.51872	11.8778	37.8646	42.2513	42.6455
ENSMUSG00000048281	24.2035	37.8412	24.766	17.0447	137.695	103.848	79.952	-1.50141	8.14926e-11	4.42343e-09	Dleu7	14	62276231	62293047	-	1536	protein_coding	deleted in lymphocytic leukemia, 7 [Source:MGI Symbol;Acc:MGI:2447771]	-	21	41	25	19	144	99	79	1.00257	1.65456	1.13487	0.740316	5.52127	4.16403	3.12406
ENSMUSG00000103108	1036.14	1191.54	892.568	1088.17	3428.03	2897.26	2902.56	-1.47582	6.77037e-41	7.17699e-38	Rncr4	6	30172893	30175126	+	2234	lincRNA	retina expressed non-coding RNA 4 [Source:MGI Symbol;Acc:MGI:5610274]	-	899	1291	901	1213	3585	2762	2868	27.358	33.2086	26.071	30.1267	87.6178	74.0507	72.2933
ENSMUSG00000108985	17.2882	26.7657	52.504	25.1185	127.177	148.954	88.0484	-1.40812	3.49473e-09	1.44778e-07	A930030B08Rik	7	99900192	99904156	-	3965	TEC	RIKEN cDNA A930030B08 gene [Source:MGI Symbol;Acc:MGI:1924443]	-	15	29	53	28	133	142	87	0.257191	0.420303	0.864068	0.391822	1.83145	2.14503	1.2356
ENSMUSG00000102990	88.7461	86.7578	36.6537	72.6643	192.199	285.321	234.796	-1.39147	3.19576e-11	1.86349e-09	Gm37764	1	150324538	150326687	+	2150	TEC	predicted gene, 37764 [Source:MGI Symbol;Acc:MGI:5610992]	-	77	94	37	81	201	272	232	2.43478	2.51245	1.11245	2.09035	5.10439	7.57738	6.07648
ENSMUSG00000112198	16.1357	23.0739	5.94385	5.38254	129.089	88.1137	34.4097	-1.38908	1.12022e-07	3.56039e-06	Gm4065	10	118803719	118805290	-	1470	lincRNA	predicted gene 4065 [Source:MGI Symbol;Acc:MGI:3782240]	-	14	25	6	6	135	84	34	1.08899	1.64375	0.443767	0.380902	8.43352	5.75647	2.19063
ENSMUSG00000043020	4.61019	2.76887	0.990641	8.9709	34.4238	26.2243	36.4338	-1.32874	3.85035e-07	1.05132e-05	Wdr63	3	146040526	146108130	-	3311	protein_coding	WD repeat domain 63 [Source:MGI Symbol;Acc:MGI:3045269]	-	4	3	1	10	36	25	36	0.179496	0.113793	0.042668	0.366236	1.29741	0.988362	1.33811
ENSMUSG00000112354	119.865	77.5283	62.4104	95.9887	210.367	296.859	270.217	-1.31043	3.76205e-12	2.66913e-10	Gm33843	10	96519157	96595731	-	1637	lincRNA	predicted gene, 33843 [Source:MGI Symbol;Acc:MGI:5593002]	-	104	84	63	107	220	283	267	4.31909	2.94875	2.48775	3.62667	7.33771	10.3544	9.1847
ENSMUSG00000112264	185.56	128.291	135.718	139.946	350.931	394.414	440.242	-1.30017	3.61847e-18	5.87463e-16	Gm48505	10	96495721	96523982	-	2031	lincRNA	predicted gene, 48505 [Source:MGI Symbol;Acc:MGI:6098035]	-	161	139	137	156	367	376	435	5.38919	3.9329	4.3604	4.26175	9.86603	11.0883	12.061
ENSMUSG00000113575	5.76273	4.61478	3.96256	7.17672	32.5113	34.6161	23.2772	-1.29228	7.56464e-07	1.93915e-05	A930023M06Rik	12	117602039	117603763	+	1093	sense_intronic	RIKEN cDNA A930023M06 gene [Source:MGI Symbol;Acc:MGI:1925208]	-	5	5	4	8	34	33	23	0.310998	0.26288	0.236568	0.40611	1.69842	1.80835	1.18498
ENSMUSG00000087173	9.22038	9.22955	9.90641	11.6622	48.767	44.0569	32.3856	-1.29097	3.13857e-07	8.83753e-06	Gm11337	13	23794768	23804599	-	335	antisense	predicted gene 11337 [Source:MGI Symbol;Acc:MGI:3651858]	-	8	10	10	13	51	42	32	1.6235	1.71539	1.92961	2.15314	8.31212	7.50919	5.37907
ENSMUSG00000107548	307.73	395.948	259.548	244.009	675.088	1036.39	766.122	-1.28748	9.89528e-15	1.094e-12	Gm43866	6	115935688	115936526	-	839	TEC	predicted gene, 43866 [Source:MGI Symbol;Acc:MGI:5690258]	-	267	429	262	272	706	988	757	21.635	29.3835	20.1862	17.9879	45.944	70.5316	50.8085
ENSMUSG00000084847	46.1019	33.2264	36.6537	34.0894	112.833	129.024	91.0845	-1.27947	3.33601e-10	1.66995e-08	Gm15507	9	59957511	59961801	-	1246	lincRNA	predicted gene 15507 [Source:MGI Symbol;Acc:MGI:3782955]	-	40	36	37	38	118	123	90	3.96988	3.02009	3.49162	3.07798	9.40541	10.7548	7.39868
ENSMUSG00000056288	318.103	443.942	363.565	350.762	989.683	1013.31	834.942	-1.27194	8.30833e-24	2.82499e-21	Gm11961	11	4620275	4630011	-	1562	antisense	predicted gene 11961 [Source:MGI Symbol;Acc:MGI:3652303]	-	276	481	367	391	1035	966	825	18.0593	26.6034	22.8332	20.8802	54.389	55.6865	44.7137
ENSMUSG00000087077	0	0	0	0	20.0805	15.7346	14.1687	-1.26108	1.77783e-07	5.39366e-06	Gm12480	4	54651903	54656077	+	774	lincRNA	predicted gene 12480 [Source:MGI Symbol;Acc:MGI:3651952]	-	0	0	0	0	21	15	14	0	0	0	0	1.48137	1.16075	1.01857
ENSMUSG00000113671	28.8137	35.0723	33.6818	22.4273	106.14	112.24	65.7833	-1.25918	1.90119e-08	6.85226e-07	Gm2233	13	43948879	43952699	+	1916	lincRNA	predicted gene 2233 [Source:MGI Symbol;Acc:MGI:3780403]	-	25	38	34	25	111	107	65	0.887058	1.13971	1.14709	0.723966	3.16311	3.34485	1.91038
ENSMUSG00000099447	49.5595	68.2987	39.6256	62.7963	134.826	152.101	183.181	-1.25156	1.5511e-10	8.10214e-09	2310030A07Rik	1	150320681	150346771	-	610	antisense	RIKEN cDNA 2310030A07 gene [Source:MGI Symbol;Acc:MGI:1922834]	-	43	74	40	70	141	145	181	4.79232	6.97124	4.23882	6.3671	12.6205	14.2373	16.709
ENSMUSG00000037318	209.764	344.262	225.866	195.566	783.141	609.453	569.784	-1.25066	2.64985e-13	2.29582e-11	Traf3ip3	1	193175453	193201703	-	5756	protein_coding	TRAF3 interacting protein 3 [Source:MGI Symbol;Acc:MGI:2441706]	-	182	373	228	218	819	581	563	10.1502	17.5838	12.0906	9.92262	36.6831	28.547	26.008
ENSMUSG00000035539	76.0681	74.7594	58.4478	62.7963	236.185	166.787	154.844	-1.23989	2.54889e-11	1.52603e-09	Ccdc180	4	45890303	45950774	+	5292	protein_coding	coiled-coil domain containing 180 [Source:MGI Symbol;Acc:MGI:2685871]	-	66	81	59	70	247	159	153	1.42851	1.48192	1.21423	1.23653	4.29354	3.03192	2.743
ENSMUSG00000056682	8.06783	16.6132	14.8596	5.38254	43.0297	55.5956	40.482	-1.22882	1.56868e-06	3.76923e-05	4930465K10Rik	18	77714210	77715449	+	1238	pseudogene	RIKEN cDNA 4930465K10 gene [Source:MGI Symbol;Acc:MGI:1914890]	-	7	18	15	6	45	53	40	0.384401	0.835526	0.783224	0.268908	1.98462	2.56415	1.81946
ENSMUSG00000079173	874.783	848.196	758.831	829.809	1711.63	2068.57	2282.17	-1.22834	4.39062e-29	2.55237e-26	Zan	5	137378637	137477064	-	19813	protein_coding	zonadhesin [Source:MGI Symbol;Acc:MGI:106656]	-	759	919	766	925	1790	1972	2255	6.64177	6.79764	6.37351	6.60618	12.5798	15.203	16.345
ENSMUSG00000043155	26.5086	38.7641	21.7941	38.5749	84.147	98.6035	99.1809	-1.22821	1.37096e-08	5.07384e-07	Hpdl	4	116819904	116821707	-	1804	protein_coding	4-hydroxyphenylpyruvate dioxygenase-like [Source:MGI Symbol;Acc:MGI:2444646]	-	23	42	22	43	88	94	98	0.86676	1.33789	0.788318	1.32253	2.66338	3.1209	3.05909
ENSMUSG00000113265	29.9662	28.6116	30.7099	27.8098	89.8843	90.2117	72.8676	-1.22015	6.11069e-09	2.43092e-07	Gm30198	12	102447328	102467609	+	824	lincRNA	predicted gene, 30198 [Source:MGI Symbol;Acc:MGI:5589357]	-	26	31	31	31	94	86	72	2.14513	2.16193	2.43192	2.08741	6.22855	6.25115	4.92048
ENSMUSG00000051297	14.9831	11.9984	8.91577	10.7651	49.7232	58.7425	27.3254	-1.19588	2.75869e-06	6.25337e-05	2410124H12Rik	16	92478742	92497366	+	706	sense_overlapping	RIKEN cDNA 2410124H12 gene [Source:MGI Symbol;Acc:MGI:1924035]	-	13	13	9	12	52	56	27	1.25183	1.05815	0.824049	0.943083	4.02147	4.75086	2.15358
ENSMUSG00000116665	723.799	722.674	494.33	672.818	1353.05	1776.96	1659.76	-1.19501	1.89841e-18	3.19731e-16	AC110166.1	16	34943175	34958994	-	3755	antisense	Novel transcript, antisense to Mylk	-	628	783	499	750	1415	1694	1640	21.0939	22.231	15.937	20.5601	38.1709	50.1293	45.6284
ENSMUSG00000106476	42.6442	46.1478	36.6537	47.5458	98.4902	118.534	134.603	-1.19429	1.03617e-09	4.67992e-08	Rpl36-ps9	5	137432987	137433263	+	277	processed_pseudogene	ribosomal protein L36, pseudogene 9 [Source:MGI Symbol;Acc:MGI:3643602]	-	37	50	37	53	103	113	133	9.08091	10.3729	8.6345	10.6162	20.3022	24.4336	27.038
ENSMUSG00000021336	331.934	300.883	315.024	375.881	543.131	977.643	1001.93	-1.18743	1.93422e-12	1.47697e-10	Slc17a4	13	23895890	23915009	-	5978	protein_coding	solute carrier family 17 (sodium phosphate), member 4 [Source:MGI Symbol;Acc:MGI:2442850]	-	288	326	318	419	568	932	990	6.88205	6.58481	7.22537	8.17156	10.9007	19.621	19.5955
ENSMUSG00000079834	705.359	742.979	434.891	655.773	1456.32	1686.75	1512	-1.1802	6.87332e-16	9.04117e-14	Tmlhe	GL456233.1	159647	334183	+	2251	protein_coding	trimethyllysine hydroxylase, epsilon [Source:NCBI gene;Acc:192289]	-	612	805	439	731	1523	1608	1494	18.4835	20.5508	12.6068	18.0184	36.9412	42.7857	37.3747
ENSMUSG00000090003	56.4748	47.0707	39.6256	70.8701	104.228	173.081	171.037	-1.17736	2.50345e-08	8.93361e-07	Gm15882	8	58523294	58524326	+	855	antisense	predicted gene 15882 [Source:MGI Symbol;Acc:MGI:3801770]	-	49	51	40	79	109	165	169	3.89617	3.42777	3.02419	5.12666	6.9606	11.5586	11.1307
ENSMUSG00000087298	35.729	38.7641	34.6724	41.2662	79.3659	113.289	117.398	-1.17672	1.06721e-08	4.04036e-07	Gm9392	7	46820864	46821417	-	554	processed_pseudogene	predicted pseudogene 9392 [Source:MGI Symbol;Acc:MGI:3643262]	-	31	42	35	46	83	108	116	3.80417	4.3566	4.08389	4.60704	8.18003	11.6762	11.791
ENSMUSG00000079103	28.8137	20.305	9.90641	17.9418	58.3292	70.2812	57.6869	-1.17078	1.35491e-06	3.34019e-05	Tgm7	2	121093565	121109795	-	2151	protein_coding	transglutaminase 7 [Source:MGI Symbol;Acc:MGI:2151164]	-	25	22	10	20	61	67	57	0.790145	0.587747	0.300521	0.515897	1.54837	1.86562	1.49223
ENSMUSG00000086417	13.8306	23.9968	20.8035	12.5593	68.8475	72.3791	39.47	-1.16871	2.19396e-06	5.06889e-05	Gm12996	4	116824903	116830603	+	636	antisense	predicted gene 12996 [Source:MGI Symbol;Acc:MGI:3650481]	-	12	26	21	14	72	69	39	1.28272	2.34922	2.13441	1.22136	6.18104	6.49801	3.45311
ENSMUSG00000115579	65.6952	78.4512	57.4572	81.6352	196.024	180.423	160.916	-1.16816	1.57969e-11	9.88456e-10	Gm49156	14	48727414	48740809	-	1432	lincRNA	predicted gene, 49156 [Source:MGI Symbol;Acc:MGI:6118576]	-	57	85	58	91	205	172	159	2.70607	3.41102	2.61818	3.52592	7.81623	7.19406	6.25254
ENSMUSG00000099338	87.5936	167.055	142.652	105.857	428.385	391.267	209.494	-1.15973	2.89005e-08	1.02321e-06	2810030D12Rik	8	13200720	13207714	+	1422	bidirectional_promoter_lncRNA	RIKEN cDNA 2810030D12 gene [Source:MGI Symbol;Acc:MGI:1925585]	-	76	181	144	118	448	373	207	5.80538	11.6868	10.4589	7.3564	27.4836	25.1019	13.0973
ENSMUSG00000085819	182.102	209.511	151.568	181.212	367.187	528.682	409.88	-1.14537	6.22893e-14	6.20174e-12	Ube4bos1	4	149347885	149365277	+	2903	antisense	ubiquitination factor E4B, opposite strand 1 [Source:MGI Symbol;Acc:MGI:1925072]	-	158	227	153	202	384	504	405	6.11702	7.42864	5.63225	6.38264	11.9397	17.1907	12.9877
ENSMUSG00000096001	5.76273	11.0755	5.94385	11.6622	21.0367	55.5956	39.47	-1.14517	1.15783e-05	0.000219866	2610528A11Rik	14	37102140	37114022	-	828	protein_coding	RIKEN cDNA 2610528A11 gene [Source:MGI Symbol;Acc:MGI:1917295]	-	5	12	6	13	22	53	39	0.466283	0.945936	0.532034	0.98944	1.64771	4.35449	3.01259
ENSMUSG00000085376	163.662	139.366	135.718	156.991	391.092	377.63	290.458	-1.14038	7.2514e-15	8.32341e-13	Gm14508	5	116009316	116016105	+	901	antisense	predicted gene 14508 [Source:MGI Symbol;Acc:MGI:3705279]	-	142	151	137	175	409	360	287	10.7145	9.63075	9.82904	10.7767	24.7848	23.9313	17.9374
ENSMUSG00000036083	142.916	100.602	87.1764	81.6352	230.448	248.607	283.374	-1.13585	1.61305e-10	8.4014e-09	Slc17a3	13	23839434	23860716	+	6777	protein_coding	solute carrier family 17 (sodium phosphate), member 3 [Source:MGI Symbol;Acc:MGI:2389216]	-	124	109	88	91	241	237	280	2.75852	2.04966	1.86142	1.6522	4.30576	4.64498	5.15949
ENSMUSG00000100593	33.4239	83.066	64.3917	94.1945	177.856	247.558	154.844	-1.13472	3.38866e-07	9.45311e-06	1700119H24Rik	16	34935854	34939329	-	588	antisense	RIKEN cDNA 1700119H24 gene [Source:MGI Symbol;Acc:MGI:1923899]	-	29	90	65	105	186	236	153	3.35296	8.79575	7.14581	9.90799	17.2712	24.0394	14.6527
ENSMUSG00000079010	8.06783	7.38364	6.93449	9.868	29.6427	32.5182	30.3615	-1.12325	1.32433e-05	0.000246038	Gm11032	11	4620067	4621698	+	102	protein_coding	predicted gene 11032 [Source:MGI Symbol;Acc:MGI:3779255]	-	7	8	7	11	31	31	30	4.66558	4.50711	4.43622	5.98365	16.5939	18.2033	16.5624
ENSMUSG00000040632	15802.6	19482.7	14136.4	16467.9	39001.2	35733.3	35858	-1.114	1.5368e-26	7.10118e-24	Nrl	14	55518978	55524981	-	5689	protein_coding	neural retina leucine zipper gene [Source:MGI Symbol;Acc:MGI:102567]	TF_bZIP	13711	21109	14270	18357	40787	34065	35431	465.135	605.31	460.301	508.25	1111.25	1018.12	995.607
ENSMUSG00000094690	20.7458	39.6871	27.738	25.1185	70.76	102.799	63.7592	-1.08338	2.7652e-06	6.26025e-05	1600014C23Rik	17	45732864	45733844	-	518	protein_coding	RIKEN cDNA 1600014C23 gene [Source:MGI Symbol;Acc:MGI:1919490]	-	18	43	28	28	74	98	63	2.36238	4.77031	3.49417	2.99917	7.79989	11.3314	6.84878
ENSMUSG00000097727	456.409	431.02	388.331	479.046	878.762	1032.19	976.629	-1.08199	2.71537e-23	8.43685e-21	F630040K05Rik	17	45734506	45788594	+	5327	lincRNA	RIKEN cDNA F630040K05 gene [Source:MGI Symbol;Acc:MGI:4437734]	-	396	467	392	534	919	984	965	13.0057	12.9645	12.2414	14.3135	24.2399	28.4717	26.2518
ENSMUSG00000115575	57.6273	54.4544	48.5414	46.6487	107.096	187.766	103.229	-1.0818	2.88905e-07	8.21193e-06	Gm49024	14	34661707	34662704	+	998	lincRNA	predicted gene, 49024 [Source:MGI Symbol;Acc:MGI:6118390]	-	50	59	49	52	112	179	102	3.40602	3.39726	3.17381	2.89099	6.12737	10.7426	5.75535
ENSMUSG00000021255	4929.44	5025.49	2435	3978.6	9626.22	9906.5	9042.67	-1.08044	8.95268e-11	4.81601e-09	Esrrb	12	86361117	86521628	+	6047	protein_coding	estrogen related receptor, beta [Source:MGI Symbol;Acc:MGI:1346832]	ESR-like	4277	5445	2458	4435	10067	9444	8935	116.075	124.91	63.4292	98.2334	219.421	225.807	200.858
ENSMUSG00000084788	208.611	175.362	159.493	148.917	335.632	416.442	422.025	-1.08	1.4896e-13	1.36264e-11	Gm11342	13	24335937	24414803	-	1784	antisense	predicted gene 11342 [Source:MGI Symbol;Acc:MGI:3652098]	-	181	190	161	166	351	397	417	13.7028	12.1586	11.5895	10.2566	21.3411	26.4791	26.1494
ENSMUSG00000106357	2.30509	6.46069	3.96256	7.17672	22.9492	22.0284	27.3254	-1.07915	3.7792e-05	0.000616661	Gm8013	5	96921272	96934867	+	462	lincRNA	predicted gene 8013 [Source:MGI Symbol;Acc:MGI:3648644]	-	2	7	4	8	24	21	27	0.294304	0.870691	0.559672	0.960775	2.83632	2.72249	3.29097
ENSMUSG00000110020	48.407	30.4575	17.8315	19.736	87.0156	86.0158	74.8917	-1.07846	5.78059e-06	0.00012113	Gm45441	7	45830895	45835249	+	1459	antisense	predicted gene 45441 [Source:MGI Symbol;Acc:MGI:5791277]	-	42	33	18	22	91	82	74	3.76693	2.5018	1.53504	1.61037	6.55479	6.47938	5.4975
ENSMUSG00000109761	10.3729	5.53773	3.96256	8.07381	22.9492	34.6161	28.3374	-1.07682	3.77483e-05	0.000616661	5430403N17Rik	8	35864085	35882957	-	2553	lincRNA	RIKEN cDNA 5430403N17 gene [Source:MGI Symbol;Acc:MGI:5439418]	-	9	6	4	9	24	33	28	0.239662	0.135054	0.10128	0.195598	0.513271	0.774197	0.617603
ENSMUSG00000005124	622.375	611.919	480.461	508.65	1242.12	1308.07	1111.23	-1.07652	2.37574e-20	5.22112e-18	Wisp1	15	66891320	66923201	+	5565	protein_coding	WNT1 inducible signaling pathway protein 1 [Source:MGI Symbol;Acc:MGI:1197008]	-	540	663	485	567	1299	1247	1098	21.4812	22.2936	18.3449	18.4083	41.5005	43.7032	36.1795
ENSMUSG00000004668	160.204	169.824	172.372	150.711	336.588	425.883	334.989	-1.07584	6.77421e-15	7.82551e-13	Abca13	11	9191942	9684259	+	19737	protein_coding	ATP-binding cassette, sub-family A (ABC1), member 13 [Source:MGI Symbol;Acc:MGI:2388707]	-	139	184	174	168	352	406	331	1.38601	1.55085	1.64971	1.36718	2.81885	3.56663	2.73384
ENSMUSG00000025340	3818.39	4905.51	3541.54	3941.82	9743.84	9464.88	7552.93	-1.07415	7.25711e-19	1.34825e-16	Rabgef1	5	130171798	130214342	+	4168	protein_coding	RAB guanine nucleotide exchange factor (GEF) 1 [Source:MGI Symbol;Acc:MGI:1929459]	-	3313	5315	3575	4394	10190	9023	7463	188.794	256.018	193.71	204.359	466.359	453.001	352.27
ENSMUSG00000036964	252.408	240.891	211.997	240.42	569.905	603.159	414.941	-1.07116	3.91638e-14	3.96501e-12	Trim17	11	58954685	58973098	+	3736	protein_coding	tripartite motif-containing 17 [Source:MGI Symbol;Acc:MGI:1861440]	-	219	261	214	268	596	575	410	4.44965	4.48252	4.13431	4.44408	9.72538	10.2927	6.90018
ENSMUSG00000103001	41.4917	39.6871	49.5321	44.8545	97.534	122.73	100.193	-1.06957	3.86972e-08	1.33594e-06	A930005N03Rik	1	34269882	34271128	-	1247	TEC	RIKEN cDNA A930005N03 gene [Source:MGI Symbol;Acc:MGI:1924441]	-	36	43	50	50	102	117	99	1.96265	1.98157	2.5919	2.22473	4.46601	5.61963	4.47065
ENSMUSG00000086103	1.15255	4.61478	3.96256	2.69127	14.3432	22.0284	23.2772	-1.06745	3.71254e-05	0.000607111	Gm11832	4	11611139	11615007	-	432	antisense	predicted gene 11832 [Source:MGI Symbol;Acc:MGI:3650310]	-	1	5	4	3	15	21	23	0.157371	0.665111	0.598538	0.385311	1.89581	2.91155	2.9981
ENSMUSG00000104546	183.255	203.05	198.128	201.845	349.019	460.499	506.025	-1.06315	7.55273e-14	7.39716e-12	Gm43858	3	152386260	152388037	+	1778	TEC	predicted gene 43858 [Source:MGI Symbol;Acc:MGI:5663995]	-	159	220	200	225	365	439	500	6.07957	7.11048	7.27133	7.02141	11.2085	14.7884	15.8358
ENSMUSG00000032514	35.729	42.456	41.6069	44.8545	89.8843	102.799	107.277	-1.06112	5.84946e-08	1.95935e-06	Ttc21a	9	119937606	119967793	+	5388	protein_coding	tetratricopeptide repeat domain 21A [Source:MGI Symbol;Acc:MGI:1921302]	-	31	46	42	50	94	98	106	0.681159	0.854369	0.877494	0.89665	1.6588	1.89712	1.92925
ENSMUSG00000089964	31.1188	35.9953	44.5789	35.8836	94.6654	104.897	74.8917	-1.04928	4.81268e-07	1.29254e-05	Gm16582	1	74850895	74879953	+	1930	processed_transcript	predicted gene 16582 [Source:MGI Symbol;Acc:MGI:4415002]	-	27	39	45	40	99	100	74	0.951073	1.16122	1.5072	1.14994	2.80068	3.10335	2.15912
ENSMUSG00000097443	82.9834	71.0676	50.5227	63.6934	193.156	136.366	145.735	-1.04922	3.9942e-08	1.37365e-06	Gm17529	12	58953089	58968011	+	3093	antisense	predicted gene, 17529 [Source:MGI Symbol;Acc:MGI:4937163]	-	72	77	51	71	202	130	144	1.58256	1.4306	1.06587	1.27366	3.56581	2.5174	2.62171
ENSMUSG00000056329	13.8306	8.3066	8.91577	28.7069	46.8546	74.4771	39.47	-1.04389	5.69062e-05	0.000871376	1810010K12Rik	2	19451828	19454995	+	2289	processed_transcript	RIKEN cDNA 1810010K12 gene [Source:MGI Symbol;Acc:MGI:1921419]	-	12	9	9	32	49	71	39	0.644399	0.408523	0.459541	1.40246	2.11324	3.35902	1.73474
ENSMUSG00000030324	325667	300685	222253	294177	641170	582313	607122	-1.03962	1.30568e-19	2.61441e-17	Rho	6	115931748	115940036	+	6043	protein_coding	rhodopsin [Source:MGI Symbol;Acc:MGI:97914]	-	282563	325785	224353	327923	670529	555127	599893	13330.9	12992	10064.3	12626.5	25406.2	23073.7	23442.9
ENSMUSG00000052151	443.731	453.171	347.715	430.603	982.99	846.521	847.086	-1.03331	1.73353e-18	2.94716e-16	Plpp2	10	79526430	79533796	-	1654	protein_coding	phospholipid phosphatase 2 [Source:MGI Symbol;Acc:MGI:1354945]	-	385	491	351	480	1028	807	837	20.74	22.3578	17.9789	21.1035	44.4754	38.3003	37.3481
ENSMUSG00000024227	3956.69	4082.23	2146.72	3162.24	7146.76	7477.08	7500.31	-1.03193	3.83329e-11	2.19999e-09	Pdzph1	17	58878808	58991375	-	4434	protein_coding	PDZ and pleckstrin homology domains 1 [Source:MGI Symbol;Acc:MGI:1916489]	-	3433	4423	2167	3525	7474	7128	7411	119.503	130.144	71.7252	100.145	208.948	218.602	213.686
ENSMUSG00000071648	16459.5	21257.5	16638.8	17722	42426.3	35312.6	35958.2	-1.02591	8.70077e-22	2.23995e-19	Rom1	19	8927382	8929356	-	1526	protein_coding	rod outer segment membrane protein 1 [Source:MGI Symbol;Acc:MGI:97998]	-	14281	23032	16796	19755	44369	33664	35530	636.226	867.331	711.486	718.284	1587.49	1321.29	1311.12
ENSMUSG00000086232	176.34	184.591	152.559	147.123	324.157	400.708	343.085	-1.02335	2.34393e-13	2.06049e-11	Gm7546	7	65579998	65635913	-	966	transcribed_unprocessed_pseudogene	predicted gene 7546 [Source:MGI Symbol;Acc:MGI:3644883]	-	153	200	154	164	339	382	339	16.7767	18.5373	16.0563	14.6766	29.8534	36.9029	30.79
ENSMUSG00000030276	310.035	331.341	311.061	367.807	633.971	701.763	739.809	-1.01424	1.62439e-19	3.21683e-17	Ttll3	6	113389260	113414587	+	5041	protein_coding	tubulin tyrosine ligase-like family, member 3 [Source:MGI Symbol;Acc:MGI:2141418]	-	269	359	314	410	663	669	731	9.73787	10.9852	10.8081	12.1133	19.2754	21.3363	21.9192
ENSMUSG00000087063	27.6611	18.4591	25.7567	32.2953	69.8038	83.9178	50.6025	-1.01324	1.30742e-05	0.000243398	Gm15857	5	123293638	123310324	-	789	antisense	predicted gene 15857 [Source:MGI Symbol;Acc:MGI:3801821]	-	24	20	26	36	73	80	50	2.06796	1.45667	2.13016	2.53162	5.05164	6.07298	3.56858
ENSMUSG00000051920	6.91528	5.53773	8.91577	8.07381	20.0805	27.2733	34.4097	-1.01084	0.000107655	0.00149465	Rspo2	15	43020794	43170826	-	5112	protein_coding	R-spondin 2 [Source:MGI Symbol;Acc:MGI:1922667]	-	6	6	9	9	21	26	34	0.126325	0.10678	0.180173	0.154649	0.355089	0.482274	0.592943
ENSMUSG00000067872	21.8984	25.8428	28.7286	32.2953	82.2346	84.9668	46.5543	-1.01057	1.39935e-05	0.000258644	Ccdc87	19	4839366	4842528	+	3163	protein_coding	coiled-coil domain containing 87 [Source:MGI Symbol;Acc:MGI:3026882]	-	19	28	29	36	86	81	46	0.408378	0.508706	0.592672	0.631505	1.48452	1.53382	0.818957
ENSMUSG00000112445	3.45764	2.76887	3.96256	0.89709	10.5184	19.9305	26.3133	-1.00811	7.67682e-05	0.00112292	Gm47830	10	25415354	25416185	-	634	processed_pseudogene	predicted gene, 47830 [Source:MGI Symbol;Acc:MGI:6097027]	-	3	3	4	1	11	19	26	0.321691	0.271919	0.407836	0.0875153	0.947305	1.79495	2.30933
ENSMUSG00000023978	52272.6	54142.4	42619.4	51414.9	105018	98896.1	105466	-1.00791	8.26142e-28	4.25369e-25	Prph2	17	46910459	46924933	+	3002	protein_coding	peripherin 2 [Source:MGI Symbol;Acc:MGI:102791]	-	45354	58662	43022	57313	109827	94279	104210	1523.39	1665.54	1374.03	1571.14	2962.68	2789.93	2899.35
ENSMUSG00000005696	152.136	227.97	171.381	145.329	438.903	333.573	369.398	-1.0066	4.89468e-10	2.37116e-08	Sh2d1a	X	42502453	42529330	+	5505	protein_coding	SH2 domain containing 1A [Source:MGI Symbol;Acc:MGI:1328352]	-	132	247	173	162	459	318	365	7.03836	11.1326	8.77104	7.04982	19.6557	14.9384	16.1207
ENSMUSG00000022844	313.493	531.622	383.378	350.762	1004.03	1012.26	615.327	-1.00296	1.11182e-08	4.1806e-07	Pdia5	16	35397312	35490873	-	2771	protein_coding	protein disulfide isomerase associated 5 [Source:MGI Symbol;Acc:MGI:1919849]	-	272	576	387	391	1050	965	608	18.7924	33.6384	25.4233	22.0473	58.2613	58.7382	34.7945
ENSMUSG00000029672	3340.08	3059.6	2003.08	2865.31	5617.77	5924.6	6327.34	-1.00231	1.6431e-13	1.48051e-11	Fam3c	6	22306520	22356243	-	3713	protein_coding	family with sequence similarity 3, member C [Source:MGI Symbol;Acc:MGI:107892]	-	2898	3315	2022	3194	5875	5648	6252	145.401	140.589	96.4622	130.788	236.731	249.657	259.826
ENSMUSG00000024795	59.9324	52.6085	57.4572	38.5749	106.14	120.632	129.542	-0.999424	2.34435e-07	6.85836e-06	Kif20b	19	34922361	34975745	+	6957	protein_coding	kinesin family member 20B [Source:MGI Symbol;Acc:MGI:2444576]	-	52	57	58	43	111	115	128	1.77736	1.64683	1.88499	1.19952	3.04701	3.46299	3.62391
ENSMUSG00000049832	50.7121	49.8396	17.8315	22.4273	107.096	93.3586	84.0002	-0.997006	3.68311e-05	0.000602845	Rbx1-ps	17	35935624	35935950	-	327	processed_pseudogene	ring-box 1, pseudogene [Source:MGI Symbol;Acc:MGI:3710517]	-	44	54	18	25	112	89	83	9.14771	9.48973	3.55828	4.24195	18.7006	16.3016	14.2933
ENSMUSG00000092276	9.22038	5.53773	5.94385	7.17672	30.5989	24.1264	21.2531	-0.990822	0.000149412	0.00197691	1700116B05Rik	16	50783409	50784091	+	414	lincRNA	RIKEN cDNA 1700116B05 gene [Source:MGI Symbol;Acc:MGI:1925889]	-	8	6	6	8	32	23	21	1.49006	0.94464	1.06261	1.2161	4.78678	3.77419	3.23988
ENSMUSG00000085327	38.034	51.6855	34.6724	34.9865	121.439	106.995	64.7712	-0.989648	8.52311e-06	0.000169158	Gm16104	10	81409575	81411579	+	401	antisense	predicted gene 16104 [Source:MGI Symbol;Acc:MGI:3801749]	-	33	56	35	39	127	102	64	5.5947	8.02512	5.64208	5.39627	17.292	15.2351	8.98748
ENSMUSG00000112254	33.4239	12.9214	28.7286	41.2662	66.9351	82.8689	80.964	-0.986183	3.89073e-05	0.000631097	Gm47690	12	75505800	75508745	-	2946	TEC	predicted gene, 47690 [Source:MGI Symbol;Acc:MGI:6096796]	-	29	14	29	46	70	79	80	0.669226	0.273088	0.636327	0.86636	1.29733	1.60614	1.52918
ENSMUSG00000042282	4278.25	3507.23	2949.14	3818.91	6340.67	7694.22	8603.44	-0.985819	1.2402e-14	1.35453e-12	Gucy2f	X	142081160	142196931	-	8122	protein_coding	guanylate cyclase 2f [Source:MGI Symbol;Acc:MGI:105119]	-	3712	3800	2977	4257	6631	7335	8501	31.0708	26.8861	23.6936	29.0813	44.5761	54.0911	58.9399
ENSMUSG00000090206	13.8306	28.6116	19.8128	17.9418	59.2854	54.5466	46.5543	-0.985636	3.9478e-05	0.000639033	Tepp	8	95310566	95326323	+	1592	protein_coding	testis, prostate and placenta expressed [Source:MGI Symbol;Acc:MGI:1920657]	-	12	31	20	20	62	52	46	1.32868	2.90136	2.10561	1.80732	5.51328	5.07252	4.21883
ENSMUSG00000021123	3193.71	3881.95	3029.38	3549.79	7197.44	7022.87	6544.93	-0.983087	5.45586e-24	1.89077e-21	Rdh12	12	79208914	79222665	+	2967	protein_coding	retinol dehydrogenase 12 [Source:MGI Symbol;Acc:MGI:1925224]	-	2771	4206	3058	3957	7527	6695	6467	113.965	146.219	119.586	132.821	248.62	242.586	220.309
ENSMUSG00000025420	201.696	207.665	174.353	197.36	361.45	477.283	383.567	-0.982146	7.27165e-13	5.85011e-11	Katnal2	18	76977148	77047308	-	4061	protein_coding	katanin p60 subunit A-like 2 [Source:MGI Symbol;Acc:MGI:1924234]	-	175	225	176	220	378	455	379	8.52847	9.26864	8.15556	8.75028	14.7946	19.5356	15.2992
ENSMUSG00000029491	23769	24748.1	17060.8	20808.9	45957.6	44409.3	41765.3	-0.975337	3.6203e-17	5.62427e-15	Pde6b	5	108388391	108432397	+	5026	protein_coding	phosphodiesterase 6B, cGMP, rod receptor, beta polypeptide [Source:MGI Symbol;Acc:MGI:97525]	-	20623	26814	17222	23196	48062	42336	41268	518.505	569.853	411.711	475.97	970.469	937.76	859.427
ENSMUSG00000020212	2025.02	2184.64	1561.25	1896.45	3717.77	4132.95	3817.45	-0.973282	1.21811e-18	2.19515e-16	Mdm1	10	118141811	118168997	+	4116	protein_coding	transformed mouse 3T3 cell double minute 1 [Source:MGI Symbol;Acc:MGI:96951]	-	1757	2367	1576	2114	3888	3940	3772	80.1127	91.2281	68.3272	78.6685	142.375	158.273	142.461
ENSMUSG00000016756	70.3054	63.6839	41.6069	54.7225	99.4464	157.346	136.627	-0.968766	1.98635e-06	4.66277e-05	Cmah	13	24327404	24477377	+	10660	protein_coding	cytidine monophospho-N-acetylneuraminic acid hydroxylase [Source:MGI Symbol;Acc:MGI:103227]	-	61	69	42	61	104	150	135	1.01843	0.973754	0.666741	0.831181	1.39448	2.20634	1.86693
ENSMUSG00000028188	572.816	620.226	552.778	645.905	1017.41	1390.94	1240.77	-0.968292	2.69224e-16	3.73207e-14	Spata1	3	146457196	146499753	-	4123	protein_coding	spermatogenesis associated 1 [Source:MGI Symbol;Acc:MGI:1918201]	-	497	672	558	720	1064	1326	1226	26.4383	30.2167	28.224	31.259	45.4566	62.1443	54.0209
ENSMUSG00000005583	2084.96	1829.3	1361.14	1811.23	3326.67	3515.11	3992.54	-0.964166	2.35833e-14	2.48535e-12	Mef2c	13	83504034	83667080	+	15715	protein_coding	myocyte enhancer factor 2C [Source:MGI Symbol;Acc:MGI:99458]	SRF	1809	1982	1374	2019	3479	3351	3945	55.7494	51.6305	40.2621	50.7814	86.1064	90.9824	100.703
ENSMUSG00000029601	77.2206	104.294	69.3449	68.1789	176.9	165.738	173.061	-0.963839	4.18359e-08	1.43332e-06	Iqcd	5	120589016	120607118	+	1680	protein_coding	IQ motif containing D [Source:MGI Symbol;Acc:MGI:1922982]	-	67	113	70	76	185	158	171	2.80304	3.99607	2.78458	2.59498	6.21591	5.82361	5.92577
ENSMUSG00000034320	1398.04	1205.38	1042.15	1257.72	2115.15	2478.72	2842.85	-0.959266	1.88208e-15	2.3391e-13	Slc26a2	18	61192919	61211612	-	12370	protein_coding	solute carrier family 26 (sulfate transporter), member 2 [Source:MGI Symbol;Acc:MGI:892977]	-	1213	1306	1052	1402	2212	2363	2809	20.7667	18.8995	17.125	19.5894	30.4139	35.6412	39.834
ENSMUSG00000102969	35.729	44.3019	37.6444	29.604	109.965	90.2117	61.7351	-0.958783	1.43175e-05	0.00026436	Gm33366	13	83734709	83738535	-	3827	TEC	predicted gene, 33366 [Source:MGI Symbol;Acc:MGI:5592525]	-	31	48	38	33	115	86	61	0.550694	0.72076	0.64186	0.478442	1.64069	1.34595	0.897581
ENSMUSG00000097385	4.61019	6.46069	5.94385	8.9709	16.2557	32.5182	25.3013	-0.950795	0.000283393	0.00338438	Gm26814	6	4942147	4946295	+	4149	TEC	predicted gene, 26814 [Source:MGI Symbol;Acc:MGI:5477308]	-	4	7	6	10	17	31	25	0.0655426	0.0969533	0.093481	0.13373	0.223713	0.447514	0.339312
ENSMUSG00000004415	34.5764	35.0723	62.4104	31.3982	99.4464	106.995	81.9761	-0.950767	1.64975e-05	0.000299699	Col26a1	5	136741759	136883209	-	8176	protein_coding	collagen, type XXVI, alpha 1 [Source:MGI Symbol;Acc:MGI:2155345]	-	30	38	63	35	104	102	81	1.56525	1.6759	3.12544	1.49038	4.35788	4.68861	3.5006
ENSMUSG00000019850	4282.86	4357.27	2866.92	3932.84	7701.36	7827.44	7770.52	-0.949006	1.74917e-14	1.85423e-12	Tnfaip3	10	19000910	19015657	-	7226	protein_coding	tumor necrosis factor, alpha-induced protein 3 [Source:MGI Symbol;Acc:MGI:1196377]	-	3716	4721	2894	4384	8054	7462	7678	90.9719	97.6936	67.3656	87.5927	158.351	160.941	155.695
ENSMUSG00000102097	31.1188	21.228	17.8315	28.7069	63.1102	90.2117	40.482	-0.947582	0.000102614	0.00143684	A930006L05Rik	9	96705828	96711449	+	2814	antisense	RIKEN cDNA A930006L05 gene [Source:MGI Symbol;Acc:MGI:3045290]	-	27	23	18	32	66	86	40	0.6523	0.46969	0.413489	0.630956	1.28058	1.83047	0.800457
ENSMUSG00000051000	1146.78	1005.1	781.616	943.739	1677.2	2078.02	2101.02	-0.946688	1.16163e-13	1.08465e-11	Fam160a1	3	85660061	85817291	-	5290	protein_coding	family with sequence similarity 160, member A1 [Source:MGI Symbol;Acc:MGI:2444746]	-	995	1089	789	1052	1754	1981	2076	17.2342	15.944	12.9943	14.8713	24.3992	30.2297	29.7845
ENSMUSG00000058743	7550.33	9043.12	5348.47	7623.47	15421.8	14488.4	14932.8	-0.945793	1.16514e-12	9.12914e-11	Kcnj14	7	45816460	45824782	-	2717	protein_coding	potassium inwardly-rectifying channel, subfamily J, member 14 [Source:MGI Symbol;Acc:MGI:2384820]	-	6551	9798	5399	8498	16128	13812	14755	271.563	343.322	212.806	287.506	536.937	504.43	506.638
ENSMUSG00000001027	205.153	192.898	153.549	214.405	422.647	357.7	385.591	-0.94358	1.2293e-11	7.91188e-10	Scn4a	11	106318592	106353288	-	7041	protein_coding	sodium channel, voltage-gated, type IV, alpha [Source:MGI Symbol;Acc:MGI:98250]	-	178	209	155	239	442	341	381	3.43783	3.41202	2.84646	3.76729	6.85592	5.8023	6.09515
ENSMUSG00000034452	21611.4	17288.8	13690.7	19372.7	32236.9	34796.5	41900.9	-0.941495	2.58165e-12	1.90672e-10	Slc24a1	9	64922861	64951607	-	5213	protein_coding	solute carrier family 24 (sodium/potassium/calcium exchanger), member 1 [Source:MGI Symbol;Acc:MGI:2384871]	-	18751	18732	13820	21595	33713	33172	41402	244.537	206.493	171.37	229.847	353.099	381.129	447.235
ENSMUSG00000087235	1.15255	7.38364	0.990641	1.79418	17.2119	25.1754	15.1808	-0.93858	0.000195379	0.00248653	Gm4750	X	152432477	152434676	+	2200	transcribed_processed_pseudogene	predicted gene 4750 [Source:MGI Symbol;Acc:MGI:3647391]	-	1	8	1	2	18	24	15	0.0406847	0.27512	0.0386847	0.066409	0.588142	0.860247	0.505495
ENSMUSG00000075044	47.2544	26.7657	39.6256	40.3691	66.9351	90.2117	110.314	-0.936889	2.13985e-05	0.000379029	Slc22a29	19	8160165	8218900	-	2272	protein_coding	solute carrier family 22. member 29 [Source:MGI Symbol;Acc:MGI:3605624]	-	41	29	40	45	70	86	109	1.75085	1.0468	1.62417	1.56835	2.40072	3.23552	3.85555
ENSMUSG00000050677	84.1359	121.83	91.139	95.0916	224.711	200.354	185.205	-0.932204	1.66279e-08	6.05358e-07	Ccdc96	5	36484588	36488172	+	3585	protein_coding	coiled-coil domain containing 96 [Source:MGI Symbol;Acc:MGI:1913967]	-	73	132	92	106	235	191	183	1.38433	2.11589	1.65888	1.64055	3.57903	3.19104	2.87451
ENSMUSG00000097882	38.034	49.8396	62.4104	57.4138	115.702	115.387	107.277	-0.932118	1.42157e-06	3.47599e-05	0610038B21Rik	8	77517056	77523898	+	3071	antisense	RIKEN cDNA 0610038B21 gene [Source:MGI Symbol;Acc:MGI:1917595]	-	33	54	63	64	121	110	106	1.3978	1.93342	2.53735	2.21248	4.1162	4.10493	3.71906
ENSMUSG00000021221	1942.04	1733.31	1293.78	1864.15	3233.92	3445.88	3480.44	-0.93023	3.19103e-14	3.32402e-12	Dpf3	12	83213745	83487716	-	4225	protein_coding	D4, zinc and double PHD fingers, family 3 [Source:MGI Symbol;Acc:MGI:1917377]	-	1685	1878	1306	2078	3382	3285	3439	70.0203	65.966	51.603	70.4751	112.87	120.265	118.373
ENSMUSG00000097254	77.2206	64.6069	35.6631	38.5749	115.702	131.122	120.434	-0.92941	1.73287e-05	0.000313535	C430042M11Rik	17	83851675	83854393	-	1617	lincRNA	RIKEN cDNA C430042M11 gene [Source:MGI Symbol;Acc:MGI:2443186]	-	67	70	36	43	121	125	119	2.81691	2.48769	1.43916	1.47548	4.08566	4.63008	4.14419
ENSMUSG00000021335	50.7121	98.7562	94.1109	58.3109	148.213	190.913	160.916	-0.928516	4.98828e-06	0.000105882	Slc17a1	13	23867750	23895730	+	2372	protein_coding	solute carrier family 17 (sodium phosphate), member 1 [Source:MGI Symbol;Acc:MGI:103209]	-	44	107	95	65	155	182	159	2.37217	4.87614	4.86994	2.86004	6.71124	8.6446	7.10043
ENSMUSG00000025386	14187.9	18850.4	14799.2	15237.1	34621.7	30860.8	27237.3	-0.923485	2.89538e-16	3.98303e-14	Pde6g	11	120447605	120453500	-	2317	protein_coding	phosphodiesterase 6G, cGMP-specific, rod, gamma [Source:MGI Symbol;Acc:MGI:97526]	-	12310	20424	14939	16985	36207	29420	26913	647.242	907.716	746.859	728.854	1528.9	1362.8	1172.1
ENSMUSG00000056043	14902.4	14060.3	10988.2	14071.8	24770.8	26540.1	27367.9	-0.917877	1.45559e-18	2.57169e-16	Rgs9bp	7	35578993	35585582	-	6590	protein_coding	regulator of G-protein signalling 9 binding protein [Source:MGI Symbol;Acc:MGI:2384418]	-	12930	15234	11092	15686	25905	25301	27042	133.389	132.842	108.803	132.069	214.627	229.954	231.076
ENSMUSG00000041920	2414.59	2402.45	1910.95	2068.69	4027.58	4293.45	4440.88	-0.916185	4.5079e-20	9.55729e-18	Slc16a6	11	109450855	109473598	-	4883	protein_coding	solute carrier family 16 (monocarboxylic acid transporters), member 6 [Source:MGI Symbol;Acc:MGI:2144585]	-	2095	2603	1929	2306	4212	4093	4388	89.9727	94.4933	78.7711	80.8261	145.276	154.864	156.095
ENSMUSG00000006007	19795	29922.2	15719.5	18456.7	51657.6	48009.4	39800.9	-0.911542	1.79593e-05	0.000323645	Pdc	1	150319417	150333906	+	3350	protein_coding	phosducin [Source:MGI Symbol;Acc:MGI:98090]	-	17175	32420	15868	20574	54023	45768	39327	722.095	1152.15	634.348	705.963	1824.13	1695.28	1369.57
ENSMUSG00000085900	44.9493	83.066	77.27	92.4003	163.513	199.305	126.506	-0.911301	9.26899e-06	0.000182155	A930041C12Rik	5	107630250	107633850	-	537	antisense	RIKEN cDNA A930041C12 gene [Source:MGI Symbol;Acc:MGI:1925693]	-	39	90	78	103	171	190	125	4.93739	9.63111	9.38935	10.6423	17.3863	21.1918	13.108
ENSMUSG00000017146	126.78	127.368	112.933	112.136	210.367	248.607	258.073	-0.910589	6.5203e-10	3.06795e-08	Brca1	11	101488764	101551955	-	8533	protein_coding	breast cancer 1, early onset [Source:MGI Symbol;Acc:MGI:104537]	-	110	138	114	125	220	237	255	4.05765	4.3029	3.99848	3.76321	6.51754	7.70214	7.79143
ENSMUSG00000098021	79.5257	119.061	142.652	43.0603	170.206	269.586	238.844	-0.910585	8.12172e-05	0.00117371	Gm9522	15	39180511	39181436	+	926	processed_pseudogene	predicted gene 9522 [Source:MGI Symbol;Acc:MGI:3779931]	-	69	129	144	48	178	257	236	5.06577	8.00547	10.0523	2.8761	10.4953	16.623	14.3517
ENSMUSG00000029410	2275.13	2555.66	2216.06	2450.85	4655.81	4714.08	4244.54	-0.909411	3.34164e-27	1.62756e-24	Ppef2	5	92226679	92256278	-	2983	protein_coding	protein phosphatase, EF hand calcium-binding domain 2 [Source:MGI Symbol;Acc:MGI:1342304]	-	1974	2769	2237	2732	4869	4494	4194	68.4348	81.1434	73.7401	77.2995	135.565	137.26	120.435
ENSMUSG00000045319	243.187	223.355	182.278	263.745	445.597	467.842	433.158	-0.906749	1.60764e-11	1.00247e-09	Proser2	2	6097607	6130211	-	9563	protein_coding	proline and serine rich 2 [Source:MGI Symbol;Acc:MGI:2442238]	-	211	242	184	294	466	446	428	4.56836	4.42888	3.78794	5.19507	8.10294	8.50734	7.67567
ENSMUSG00000110754	35.729	23.9968	28.7286	19.736	61.1978	76.575	51.6146	-0.904775	9.35068e-05	0.0013258	4930405J17Rik	10	20199240	20201838	-	620	antisense	RIKEN cDNA 4930405J17 gene [Source:MGI Symbol;Acc:MGI:1921061]	-	31	26	29	22	64	73	51	3.39921	2.40985	3.02358	1.96881	5.63605	7.05212	4.63213
ENSMUSG00000111755	300.815	681.141	351.678	298.731	1675.29	1574.51	651.76	-0.901814	0.000556807	0.0059374	Gm47160	9	47473049	47474918	-	1870	TEC	predicted gene, 47160 [Source:MGI Symbol;Acc:MGI:6095933]	-	261	738	355	333	1752	1501	644	9.48869	22.6789	12.2716	9.88044	51.1539	48.0759	19.3931
ENSMUSG00000115316	62.2375	88.6037	86.1858	84.3265	119.527	213.99	178.121	-0.900041	4.15517e-06	9.05445e-05	Gm49096	14	48530358	48532665	+	2308	TEC	predicted gene, 49096 [Source:MGI Symbol;Acc:MGI:6118488]	-	54	96	87	94	125	204	176	1.59062	2.39025	2.43668	2.25978	2.95706	5.29399	4.29417
ENSMUSG00000028730	4.61019	1.84591	4.95321	3.58836	13.387	18.8815	19.229	-0.899801	0.000502641	0.00545668	Cfap57	4	118554551	118620777	-	4020	protein_coding	cilia and flagella associated protein 57 [Source:MGI Symbol;Acc:MGI:2686209]	-	4	2	5	4	14	18	19	0.0699965	0.0295833	0.0831944	0.0571271	0.196754	0.277505	0.275401
ENSMUSG00000026409	2290.11	2478.14	2134.83	2264.26	4082.09	4682.62	4285.02	-0.898856	9.76474e-26	4.18977e-23	Pfkfb2	1	130689182	130729253	-	7254	protein_coding	6-phosphofructo-2-kinase/fructose-2,6-biphosphatase 2 [Source:MGI Symbol;Acc:MGI:107815]	-	1987	2685	2155	2524	4269	4464	4234	54.9347	62.7471	56.6505	56.9514	94.7881	108.731	96.9605
ENSMUSG00000099373	709.969	602.69	506.218	697.039	943.785	1296.53	1492.77	-0.896534	2.04474e-09	8.81535e-08	Gm19667	9	105470520	105480194	+	3334	antisense	predicted gene, 19667 [Source:MGI Symbol;Acc:MGI:5011852]	-	616	653	511	777	987	1236	1475	12.561	11.2553	9.90765	12.9309	16.1636	22.2045	24.9132
ENSMUSG00000091957	148.679	95.9874	83.2139	113.93	184.55	258.047	238.844	-0.892851	1.31074e-06	3.24909e-05	Rps2-ps10	18	61259008	61259972	-	965	transcribed_processed_pseudogene	ribosomal protein S2, pseudogene 10 [Source:MGI Symbol;Acc:MGI:3645604]	-	129	104	84	127	193	246	236	9.51188	6.48202	5.8893	7.64269	11.4291	15.9806	14.414
ENSMUSG00000085794	1612.41	2618.42	2213.09	1723.31	5171.22	4126.66	2998.71	-0.892165	7.43797e-08	2.46397e-06	Vax2os	6	83692806	83712201	-	5406	antisense	ventral anterior homeobox 2, opposite strand [Source:MGI Symbol;Acc:MGI:3583301]	-	1399	2837	2234	1921	5408	3934	2963	56.8498	97.4476	86.3182	63.7096	176.493	140.84	99.7328
ENSMUSG00000074259	1319.67	1715.77	1316.56	1300.78	2727.13	2899.36	2490.66	-0.891214	2.51593e-15	3.06349e-13	Gramd2	9	59680144	59718874	+	6138	protein_coding	GRAM domain containing 2 [Source:MGI Symbol;Acc:MGI:3528937]	-	1145	1859	1329	1450	2852	2764	2461	39.2744	53.8994	43.3448	40.5918	78.5656	83.5262	69.9214
ENSMUSG00000074862	74.9156	91.3726	80.2419	81.6352	140.564	167.836	188.241	-0.889947	1.45349e-07	4.50832e-06	BC025920	10	81606270	81620703	+	3306	protein_coding	cDNA sequence BC025920 [Source:MGI Symbol;Acc:MGI:2670983]	zf-C2H2	65	99	81	91	147	160	186	2.68957	3.46263	3.18686	3.0731	4.88502	5.83272	6.37496
ENSMUSG00000034177	43.7968	35.0723	28.7286	26.9127	60.2416	82.8689	79.952	-0.886934	5.75217e-05	0.000879218	Rnf43	11	87662722	87735539	+	6558	protein_coding	ring finger protein 43 [Source:MGI Symbol;Acc:MGI:2442609]	-	38	38	29	30	63	79	79	1.15279	0.974428	0.836511	0.742767	1.53492	2.11142	1.98512
ENSMUSG00000028391	907.054	1077.09	693.449	851.339	1510.82	1892.35	1719.47	-0.88624	2.96415e-11	1.73996e-09	Wdr31	4	62448653	62470896	-	4738	protein_coding	WD repeat domain 31 [Source:MGI Symbol;Acc:MGI:1918604]	-	787	1167	700	949	1580	1804	1699	45.8078	57.4164	38.741	45.0813	73.8585	92.5086	81.913
ENSMUSG00000049969	1341.56	1332.75	807.373	1152.76	2513.89	2167.18	2105.06	-0.885204	1.00167e-09	4.55265e-08	Plekhf2	4	10988662	11007927	-	3039	protein_coding	pleckstrin homology domain containing, family F (with FYVE domain) member 2 [Source:MGI Symbol;Acc:MGI:1919051]	-	1164	1444	815	1285	2629	2066	2080	43.4322	45.5435	28.9151	39.1317	78.7823	67.9157	64.2861
ENSMUSG00000101854	14.9831	15.6902	8.91577	17.0447	34.4238	47.2038	30.3615	-0.879283	0.000503824	0.00546294	1700026F02Rik	8	70948246	71085758	-	1679	lincRNA	RIKEN cDNA 1700026F02 gene [Source:MGI Symbol;Acc:MGI:1916669]	-	13	17	9	19	36	45	30	1.27348	1.40766	0.838298	1.51903	2.83224	3.88366	2.43424
ENSMUSG00000097211	18.4408	24.9198	15.8503	13.4564	48.767	62.9384	29.3495	-0.878938	0.000470423	0.00517236	BC065403	9	72361735	72409945	-	1867	antisense	cDNA sequence BC065403 [Source:MGI Symbol;Acc:MGI:3697430]	-	16	27	16	15	51	60	29	1.05402	1.50346	1.0022	0.806464	2.69822	3.48225	1.58242
ENSMUSG00000114627	76.0681	66.4528	55.4759	62.7963	121.439	122.73	150.796	-0.876158	1.33107e-06	3.29494e-05	B230220B15Rik	13	107996285	108004669	+	2741	lincRNA	RIKEN cDNA B230220B15 gene [Source:MGI Symbol;Acc:MGI:2444601]	-	66	72	56	70	127	117	149	2.83805	2.61703	2.28966	2.45663	4.38589	4.43244	5.30709
ENSMUSG00000097236	46.1019	44.3019	53.4946	42.1633	101.359	87.0648	99.1809	-0.874838	6.38454e-06	0.000131851	4831440E17Rik	5	25499067	25501541	+	1028	lincRNA	RIKEN cDNA 4831440E17 gene [Source:MGI Symbol;Acc:MGI:2445144]	-	40	48	54	47	106	83	98	2.6453	2.68322	3.3956	2.53675	5.62988	4.83586	5.36828
ENSMUSG00000072624	137.153	169.824	121.849	145.329	244.791	351.406	256.049	-0.874436	9.45258e-08	3.05826e-06	Gm5460	14	34016758	34048193	+	4336	protein_coding	predicted gene 5460 [Source:MGI Symbol;Acc:MGI:3643519]	-	119	184	123	162	256	335	253	3.99709	5.22414	3.92835	4.44097	6.90583	9.91341	7.03902
ENSMUSG00000097666	641.969	790.973	564.665	630.655	1429.54	1273.45	1068.73	-0.874298	1.76526e-11	1.09696e-09	A330094K24Rik	18	77729681	77733470	-	1027	lincRNA	RIKEN cDNA A330094K24 gene [Source:MGI Symbol;Acc:MGI:1924343]	-	557	857	570	703	1495	1214	1056	36.8716	47.9533	35.8773	37.9803	79.4799	70.8006	57.9023
ENSMUSG00000038515	1629.7	1880.98	1581.06	1686.53	3156.47	3322.1	3012.87	-0.874279	2.34625e-23	7.41785e-21	Grtp1	8	13172022	13200620	-	4093	protein_coding	GH regulated TBC protein 1 [Source:MGI Symbol;Acc:MGI:1914040]	-	1414	2038	1596	1880	3301	3167	2977	70.7355	86.1772	75.9152	76.7559	132.621	139.578	123.356
ENSMUSG00000061288	2602.45	2366.46	1986.24	2513.65	4045.75	4674.22	4641.26	-0.873718	8.87757e-17	1.27986e-14	Taok3	5	117120129	117275219	+	11159	protein_coding	TAO kinase 3 [Source:MGI Symbol;Acc:MGI:3041177]	-	2258	2564	2005	2802	4231	4456	4586	57.5368	55.2256	48.5785	58.2714	86.5852	100.034	96.7945
ENSMUSG00000111052	474.849	452.248	366.537	525.695	866.332	894.774	830.893	-0.872696	6.37858e-13	5.22493e-11	Gm20139	10	19141751	19206702	+	5599	lincRNA	predicted gene, 20139 [Source:MGI Symbol;Acc:MGI:5012324]	-	412	490	370	586	906	853	821	9.09398	9.14225	7.76544	10.5565	16.0607	16.5877	15.0105
ENSMUSG00000089917	1942.04	2987.61	2354.75	2018.45	4995.27	4832.62	3643.38	-0.871991	1.13749e-09	5.07393e-08	Uckl1	2	181569149	181584892	-	4629	protein_coding	uridine-cytidine kinase 1-like 1 [Source:MGI Symbol;Acc:MGI:1915806]	-	1685	3237	2377	2250	5224	4607	3600	137.354	223.041	184.238	149.689	341.998	330.857	243.074
ENSMUSG00000090080	96.8139	141.212	122.84	95.0916	266.784	246.509	175.085	-0.869578	1.44811e-06	3.52653e-05	Gm15872	1	193187274	193192379	+	1108	antisense	predicted gene 15872 [Source:MGI Symbol;Acc:MGI:3801847]	-	84	153	124	106	279	235	173	5.15403	7.93523	7.23431	5.30811	13.7484	12.7033	8.79243
ENSMUSG00000056215	222.442	191.975	165.437	198.257	345.194	383.924	383.567	-0.869057	4.96613e-11	2.79671e-09	Lrguk	6	34029448	34134034	+	12068	protein_coding	leucine-rich repeats and guanylate kinase domain containing [Source:MGI Symbol;Acc:MGI:1921604]	-	193	208	167	221	361	366	379	3.48961	3.17895	2.87107	3.2612	5.2421	5.83018	5.67615
ENSMUSG00000032292	6751.62	7431.64	5846.76	6370.24	13221.6	11969.8	11733.7	-0.868636	5.29139e-20	1.09605e-17	Nr2e3	9	59942771	59960659	-	3369	protein_coding	nuclear receptor subfamily 2, group E, member 3 [Source:MGI Symbol;Acc:MGI:1346317]	RXR-like	5858	8052	5902	7101	13827	11411	11594	255.945	297.373	245.191	253.211	485.182	439.241	419.591
ENSMUSG00000074365	593.562	582.385	425.976	554.402	943.785	1098.27	1022.17	-0.868457	1.48322e-12	1.14227e-10	Crxos	7	15882617	15904020	+	2956	protein_coding	cone-rod homeobox, opposite strand [Source:MGI Symbol;Acc:MGI:2451355]	Homeobox	515	631	430	618	987	1047	1010	30.7932	31.8916	24.4469	30.1579	47.3961	55.1537	50.0223
ENSMUSG00000030956	2246.31	2071.11	1596.91	2124.31	3764.62	3707.07	3844.78	-0.866468	3.94905e-15	4.62116e-13	Fam53b	7	132712082	132813886	-	6911	protein_coding	family with sequence similarity 53, member B [Source:MGI Symbol;Acc:MGI:1925188]	-	1949	2244	1612	2368	3937	3534	3799	53.3633	51.9343	41.9666	52.915	86.5715	85.2469	86.1579
ENSMUSG00000021384	1489.09	1916.06	1431.48	1487.38	3271.21	2924.54	2727.48	-0.865888	3.64469e-14	3.73188e-12	Susd3	13	49230690	49248706	-	2837	protein_coding	sushi domain containing 3 [Source:MGI Symbol;Acc:MGI:1913579]	-	1292	2076	1445	1658	3421	2788	2695	97.0558	131.822	103.213	101.65	206.391	184.515	167.692
ENSMUSG00000004655	1570.92	1603.17	1380.95	1672.18	2958.53	2743.06	2963.28	-0.864829	3.26402e-22	9.04937e-20	Aqp1	6	55336432	55348555	+	2627	protein_coding	aquaporin 1 [Source:MGI Symbol;Acc:MGI:103201]	-	1363	1737	1394	1864	3094	2615	2928	35.2731	37.9969	34.3019	39.3694	64.3053	59.6211	62.7644
ENSMUSG00000035181	1325.43	1302.29	1117.44	1375.24	2114.19	2496.56	2540.25	-0.860724	5.79168e-17	8.62578e-15	Heatr5a	12	51875871	51971321	-	20676	protein_coding	HEAT repeat containing 5A [Source:MGI Symbol;Acc:MGI:2444133]	-	1150	1411	1128	1533	2211	2380	2510	21.222	22.0098	19.7927	23.0885	32.7684	38.6942	38.3669
ENSMUSG00000088054	41.4917	55.3773	49.5321	36.7807	104.228	103.848	77.9279	-0.857573	2.88693e-05	0.000492664	Mir1968	8	13189031	13189098	-	68	miRNA	microRNA 1968 [Source:MGI Symbol;Acc:MGI:3837215]	-	36	60	50	41	109	99	77	35.9916	50.7049	47.5309	33.454	87.5193	87.1997	63.7653
ENSMUSG00000020672	418.375	507.625	349.696	357.939	771.666	857.011	691.23	-0.852459	5.63821e-10	2.7095e-08	Sntg2	12	30174482	30373375	-	3410	protein_coding	syntrophin, gamma 2 [Source:MGI Symbol;Acc:MGI:1919541]	-	363	550	353	399	807	817	683	20.162	25.822	18.6427	18.0869	35.998	39.9787	31.4226
ENSMUSG00000115406	55.3223	73.8364	49.5321	55.6196	120.483	119.583	112.338	-0.851152	5.36397e-06	0.000112925	Gm49300	15	31368362	31370305	+	1944	TEC	predicted gene, 49300 [Source:MGI Symbol;Acc:MGI:6118795]	-	48	80	50	62	126	114	111	1.67862	2.36484	1.6626	1.76957	3.53884	3.51234	3.21536
ENSMUSG00000091908	213.221	216.895	181.287	213.508	404.479	361.896	390.651	-0.849631	7.40309e-12	4.97802e-10	Gm17231	9	57777865	57834295	+	1106	antisense	predicted gene 17231 [Source:MGI Symbol;Acc:MGI:4938058]	-	185	235	183	238	423	345	386	19.409	20.8401	18.2554	20.3787	35.6411	31.8884	33.544
ENSMUSG00000115186	99.119	83.066	74.2981	95.0916	159.688	159.444	193.302	-0.849406	4.00458e-07	1.09178e-05	Gm49417	14	70205324	70255287	+	2128	antisense	predicted gene, 49417 [Source:MGI Symbol;Acc:MGI:6155048]	-	86	90	75	106	167	152	191	4.89258	4.32795	4.05703	4.92166	7.63018	7.61841	9.00052
ENSMUSG00000097456	26.5086	63.6839	35.6631	33.1923	116.658	95.4565	61.7351	-0.847324	0.000371599	0.00425721	Gm16958	3	127161304	127168288	+	1835	antisense	predicted gene, 16958 [Source:MGI Symbol;Acc:MGI:4439882]	-	23	69	36	37	122	91	61	1.20558	3.05715	1.79423	1.58283	5.13578	4.20233	2.64845
ENSMUSG00000035504	12621.5	10875.2	8121.28	10916.7	20106.4	18681.2	20698.5	-0.847228	4.09836e-12	2.8516e-10	Reep6	10	80329953	80336441	+	2506	protein_coding	receptor accessory protein 6 [Source:MGI Symbol;Acc:MGI:1917585]	-	10951	11783	8198	12169	21027	17809	20452	420.856	382.768	299.568	381.681	648.987	602.976	651.044
ENSMUSG00000087305	288.137	441.173	368.519	297.834	695.169	736.379	565.736	-0.847108	1.61698e-08	5.92267e-07	A430035B10Rik	6	8488795	8510430	-	5056	processed_transcript	RIKEN cDNA A430035B10 gene [Source:MGI Symbol;Acc:MGI:2443789]	-	250	478	372	332	727	702	559	13.3302	21.544	18.8603	14.4478	31.1323	32.9773	24.689
ENSMUSG00000016386	268.543	311.959	259.548	270.024	503.926	510.85	524.242	-0.841992	8.91789e-14	8.50313e-12	Mpped2	2	106693269	106868356	+	3425	protein_coding	metallophosphoesterase domain containing 2 [Source:MGI Symbol;Acc:MGI:1924265]	-	233	338	262	301	527	487	518	13.6319	16.7155	14.5751	14.3726	24.7623	25.1022	25.103
ENSMUSG00000106565	38.034	22.1509	12.8783	23.3244	46.8546	59.7915	62.7471	-0.840293	0.000598712	0.0063059	Gm43582	3	104634315	104634657	-	343	processed_pseudogene	predicted gene 43582 [Source:MGI Symbol;Acc:MGI:5663719]	-	33	24	13	26	49	57	62	6.54075	4.02092	2.44999	4.20584	7.79989	9.95335	10.1789
ENSMUSG00000067220	11946.1	10733	8581.92	10914	18465.5	18759.8	20970.7	-0.840204	9.47555e-15	1.05407e-12	Cnga1	5	72603696	72644275	-	6327	protein_coding	cyclic nucleotide gated channel alpha 1 [Source:MGI Symbol;Acc:MGI:88436]	-	10365	11629	8663	12166	19311	17884	20721	361.176	342.526	287.029	345.99	540.423	549.03	598.075
ENSMUSG00000034936	950.851	1338.29	1117.44	1036.14	2466.08	2060.18	1708.34	-0.839008	5.17077e-10	2.49151e-08	Arl4d	11	101665541	101667832	+	1382	protein_coding	ADP-ribosylation factor-like 4D [Source:MGI Symbol;Acc:MGI:1933155]	-	825	1450	1128	1155	2579	1964	1688	40.5839	60.2931	52.7614	46.3711	101.89	85.1181	68.7807
ENSMUSG00000031789	13681.9	14523.6	11551.9	13554.1	23928.3	23959.6	24876.2	-0.838673	1.72913e-21	4.26859e-19	Cngb1	8	95239045	95306585	-	9355	protein_coding	cyclic nucleotide gated channel beta 1 [Source:MGI Symbol;Acc:MGI:2664102]	-	11871	15736	11661	15109	25024	22841	24580	346.666	388.436	323.794	360.103	586.895	587.653	594.568
ENSMUSG00000071103	255.865	339.648	314.033	290.657	594.766	595.817	486.796	-0.838093	7.81025e-11	4.26511e-09	1700029J07Rik	8	45953606	45975252	-	2740	protein_coding	RIKEN cDNA 1700029J07 gene [Source:MGI Symbol;Acc:MGI:1916729]	-	222	368	317	324	622	568	481	7.39827	10.3663	10.0449	8.81228	16.6474	16.6766	13.2775
ENSMUSG00000025644	31.1188	26.7657	29.7192	32.2953	67.8913	55.5956	65.7833	-0.837462	0.000118984	0.00162687	Gm7628	9	109093844	109097796	-	2010	antisense	predicted gene 7628 [Source:MGI Symbol;Acc:MGI:3643956]	-	27	29	30	36	71	53	65	0.913219	0.829106	0.964807	0.993756	1.92863	1.57931	1.82104
ENSMUSG00000034837	110041	108028	77465.2	94147	189284	170567	178061	-0.836404	2.10975e-13	1.88217e-11	Gnat1	9	107674474	107679712	-	3029	protein_coding	guanine nucleotide binding protein, alpha transducing 1 [Source:MGI Symbol;Acc:MGI:95778]	-	95476	117046	78197	104947	197951	162604	175941	5552.48	5753.74	4324.05	4981.14	9245.48	8331.16	8475.3
ENSMUSG00000047298	7500.78	6275.17	5131.52	7563.37	10905.6	12082.1	13904.6	-0.83574	1.06837e-10	5.69617e-09	Kcnv2	19	27322588	27337179	+	5108	protein_coding	potassium channel, subfamily V, member 2 [Source:MGI Symbol;Acc:MGI:2670981]	-	6508	6799	5180	8431	11405	11518	13739	86.6172	76.4895	65.5532	91.5802	121.908	135.056	151.463
ENSMUSG00000109108	38.034	48.9166	30.7099	41.2662	65.0227	103.848	81.9761	-0.833147	0.000125111	0.00170032	Gm36371	7	6156516	6157618	+	1103	bidirectional_promoter_lncRNA	predicted gene, 36371 [Source:MGI Symbol;Acc:MGI:5595530]	-	33	53	31	46	68	99	81	2.03398	2.76127	1.81678	2.31396	3.36604	5.37586	4.13535
ENSMUSG00000109420	13.8306	17.5362	13.869	21.5302	47.8108	26.2243	49.5905	-0.832634	0.000923424	0.00891324	Gm44702	7	28809304	28810497	-	592	antisense	predicted gene 44702 [Source:MGI Symbol;Acc:MGI:5753278]	-	12	19	14	24	50	25	49	1.37806	1.84433	1.5287	2.24938	4.61142	2.52934	4.66097
ENSMUSG00000087278	610.85	744.825	610.235	627.963	1393.21	1178	1019.13	-0.832606	1.02744e-11	6.70854e-10	A930006I01Rik	2	103338601	103372764	-	2229	lincRNA	RIKEN cDNA A930006I01 gene [Source:MGI Symbol;Acc:MGI:2442861]	-	530	807	616	700	1457	1123	1007	16.1649	20.8052	17.8643	17.4245	35.6891	30.1758	25.4403
ENSMUSG00000087231	179.797	175.362	156.521	148.02	303.12	352.455	270.217	-0.832389	5.43943e-09	2.17348e-07	E230016M11Rik	6	67036599	67080654	+	3841	processed_transcript	RIKEN cDNA E230016M11 gene [Source:MGI Symbol;Acc:MGI:2443524]	-	156	190	158	165	317	336	267	7.16105	7.37236	6.89632	6.18162	11.6867	13.5885	10.1522
ENSMUSG00000040543	5632.5	6394.24	5250.4	5922.59	10275.5	10974.4	10179.2	-0.829619	2.51337e-22	7.07709e-20	Pitpnm3	11	72047528	72135778	-	9815	protein_coding	PITPNM family member 3 [Source:MGI Symbol;Acc:MGI:2685726]	-	4887	6928	5300	6602	10746	10462	10058	90.6022	108.569	93.4287	99.8937	160.001	170.88	154.455
ENSMUSG00000074272	26.5086	32.3034	27.738	19.736	54.5043	53.4976	63.7592	-0.828481	0.000275888	0.00330131	Ceacam1	7	25461707	25477603	-	5806	protein_coding	carcinoembryonic antigen-related cell adhesion molecule 1 [Source:MGI Symbol;Acc:MGI:1347245]	-	23	35	28	22	57	51	63	0.8221	1.05746	0.951618	0.641779	1.63625	1.60601	1.86523
ENSMUSG00000000628	6460.03	5742.63	3517.77	5337.69	8282.74	10293.6	11255	-0.828466	9.67882e-08	3.12025e-06	Hk2	6	82725025	82774454	-	5969	protein_coding	hexokinase 2 [Source:MGI Symbol;Acc:MGI:1315197]	-	5605	6222	3551	5950	8662	9813	11121	162.08	152.085	97.6368	140.423	201.165	249.999	266.375
ENSMUSG00000085218	115.255	144.904	112.933	91.5032	249.572	228.676	189.253	-0.826192	1.20924e-06	3.02243e-05	BB218582	2	106642914	106650364	-	1311	processed_transcript	expressed sequence BB218582 [Source:MGI Symbol;Acc:MGI:2139448]	-	100	157	114	102	261	218	187	10.8428	14.3893	11.7531	9.02622	22.7279	20.8246	16.7949
ENSMUSG00000049811	3849.51	3975.17	3171.04	3681.66	6384.65	6986.16	6508.5	-0.825152	5.40621e-19	1.02553e-16	Fam161a	11	23007531	23030788	+	4396	protein_coding	family with sequence similarity 161, member A [Source:MGI Symbol;Acc:MGI:1921123]	-	3340	4307	3201	4104	6677	6660	6431	132.169	144.065	120.442	132.543	212.2	232.188	210.794
ENSMUSG00000031450	34941.8	28150.1	25032.5	34363.9	48613.1	56166.2	64076	-0.824878	4.49302e-11	2.55422e-09	Grk1	8	13405081	13421951	+	8784	protein_coding	G protein-coupled receptor kinase 1 [Source:MGI Symbol;Acc:MGI:1345146]	-	30317	30500	25269	38306	50839	53544	63313	321.39	273.304	254.708	331.42	432.835	500.078	555.948
ENSMUSG00000035932	3.45764	2.76887	0	3.58836	17.2119	10.4897	15.1808	-0.823448	0.000918327	0.00888308	Olfr750	14	51066301	51074435	-	5789	protein_coding	olfactory receptor 750 [Source:MGI Symbol;Acc:MGI:3030584]	-	3	3	0	4	18	10	15	0.0589458	0.0498257	0	0.0641442	0.284042	0.173106	0.244128
ENSMUSG00000045690	563.595	572.232	483.433	600.154	906.493	1119.25	1001.93	-0.820911	2.29911e-13	2.031e-11	Wdr89	12	75630596	75669537	-	3192	protein_coding	WD repeat domain 89 [Source:MGI Symbol;Acc:MGI:1919588]	-	489	620	488	669	948	1067	990	12.4046	13.2943	11.7706	13.8505	19.3135	23.8461	20.8019
ENSMUSG00000005233	1179.06	1287.52	895.54	976.932	1950.68	2053.89	1934.03	-0.819689	9.1647e-12	6.04971e-10	Spc25	2	69193895	69206194	-	3188	protein_coding	SPC25, NDC80 kinetochore complex component, homolog (S. cerevisiae) [Source:MGI Symbol;Acc:MGI:1913692]	-	1023	1395	904	1089	2040	1958	1911	67.5877	77.9053	56.7895	58.72	108.243	113.969	104.58
ENSMUSG00000109101	39.1866	64.6069	41.6069	40.3691	79.3659	104.897	100.193	-0.816975	0.00010473	0.00146193	Gm45132	7	98678106	98680647	-	2542	TEC	predicted gene 45132 [Source:MGI Symbol;Acc:MGI:5753708]	-	34	70	42	45	83	100	99	0.909308	1.58245	1.06804	0.982224	1.78274	2.3562	2.19312
ENSMUSG00000026831	4.61019	15.6902	11.8877	12.5593	36.3362	34.6161	22.2651	-0.816711	0.00168133	0.0143001	1700007K13Rik	2	28462001	28466332	-	965	protein_coding	RIKEN cDNA 1700007K13 gene [Source:MGI Symbol;Acc:MGI:1916577]	-	4	17	12	14	38	33	22	0.424238	1.52405	1.21015	1.21183	3.23677	3.0835	1.93271
ENSMUSG00000094595	114.102	105.217	112.933	115.725	227.579	210.844	186.217	-0.816055	4.50322e-08	1.53118e-06	Fsbp	4	11579665	11587591	+	4358	protein_coding	fibrinogen silencer binding protein [Source:MGI Symbol;Acc:MGI:5301008]	-	99	114	114	129	238	201	184	1.54438	1.50323	1.69096	1.64239	2.98178	2.76247	2.37757
ENSMUSG00000029064	73621.2	57179.9	44333.2	61770.1	103349	99358.7	124511	-0.815838	2.7992e-09	1.18137e-07	Gnb1	4	155491361	155559269	+	4268	protein_coding	guanine nucleotide binding protein (G protein), beta 1 [Source:MGI Symbol;Acc:MGI:95781]	-	63877	61953	44752	68856	108081	94720	123028	2411.23	1976.77	1606.25	2121.3	3276.59	3150.04	3846.74
ENSMUSG00000089994	18.4408	5.53773	19.8128	11.6622	19.1243	43.0079	60.723	-0.814839	0.0018514	0.0153822	Gm16239	10	99179184	99184610	-	2635	antisense	predicted gene 16239 [Source:MGI Symbol;Acc:MGI:3801746]	-	16	6	20	13	20	41	60	0.412807	0.130851	0.490642	0.273739	0.414415	0.931948	1.28225
ENSMUSG00000103562	0	11.0755	6.93449	4.48545	33.4676	24.1264	15.1808	-0.814378	0.00148294	0.0130108	2810405F15Rik	2	116075165	116076096	-	932	TEC	RIKEN cDNA 2810405F15 gene [Source:MGI Symbol;Acc:MGI:1917224]	-	0	12	7	5	35	23	15	0	0.7399	0.485509	0.297665	2.0504	1.47809	0.906312
ENSMUSG00000100212	12.678	7.38364	3.96256	12.5593	27.7303	32.5182	20.241	-0.813395	0.00187742	0.0155626	Gm5522	1	10805281	10806522	+	1242	processed_pseudogene	predicted gene 5522 [Source:MGI Symbol;Acc:MGI:3649087]	-	11	8	4	14	29	31	20	0.602114	0.370149	0.208187	0.625432	1.27486	1.49496	0.906798
ENSMUSG00000034295	2177.16	2113.57	1612.76	1757.4	3562.86	3419.65	3387.33	-0.813352	1.06733e-13	1.00179e-11	Fhod3	18	24709445	25133500	+	5408	protein_coding	formin homology 2 domain containing 3 [Source:MGI Symbol;Acc:MGI:1925847]	-	1889	2290	1628	1959	3726	3260	3347	23.7467	24.3336	19.4596	20.0989	37.6177	36.1052	34.8515
ENSMUSG00000115756	94.5088	80.2971	83.2139	116.622	126.22	201.403	225.687	-0.813198	3.13556e-05	0.000527204	Gm49519	14	48518236	48560287	+	6779	processed_transcript	predicted gene, 49519 [Source:MGI Symbol;Acc:MGI:6155213]	-	82	87	84	130	132	192	223	1.96292	1.76039	1.91195	2.53979	2.53771	4.04922	4.4217
ENSMUSG00000026094	239.73	214.126	173.362	220.684	393.961	377.63	390.651	-0.813112	5.73799e-10	2.75012e-08	Stk17b	1	53755506	53785224	-	5185	protein_coding	serine/threonine kinase 17b (apoptosis-inducing) [Source:MGI Symbol;Acc:MGI:2138162]	-	208	232	175	246	412	360	386	7.01771	6.61639	5.61408	6.77382	11.1637	10.7008	10.7873
ENSMUSG00000029177	32.2713	28.6116	24.766	38.5749	63.1102	66.0853	63.7592	-0.811681	0.00021211	0.00265817	Cenpa	5	30666777	30674830	+	5860	protein_coding	centromere protein A [Source:MGI Symbol;Acc:MGI:88375]	-	28	31	25	43	66	63	63	1.59027	1.48825	1.35009	1.99319	3.01048	3.15235	2.9638
ENSMUSG00000027636	5.76273	9.22955	4.95321	8.9709	16.2557	27.2733	23.2772	-0.811211	0.00195271	0.0160538	Sla2	2	156872457	156887192	-	3099	protein_coding	Src-like-adaptor 2 [Source:MGI Symbol;Acc:MGI:1925049]	-	5	10	5	10	17	26	23	0.12127	0.205015	0.115309	0.197948	0.33114	0.55557	0.462069
ENSMUSG00000024575	30816.8	30681.8	23827.9	27785.6	51688.2	48640.9	51305.9	-0.807953	1.02759e-16	1.4697e-14	Pde6a	18	61220482	61289924	+	4521	protein_coding	phosphodiesterase 6A, cGMP-specific, rod, alpha [Source:MGI Symbol;Acc:MGI:97524]	-	26738	33243	24053	30973	54055	46370	50695	543.914	571.612	465.241	514.222	883.112	831.035	854.203
ENSMUSG00000037885	12825.5	11131.8	9088.14	11900.8	19420.7	20232.6	20897.8	-0.807427	8.1634e-14	7.95203e-12	Stk35	2	129800517	129832287	+	6195	protein_coding	serine/threonine kinase 35 [Source:MGI Symbol;Acc:MGI:1914583]	-	11128	12061	9174	13266	20310	19288	20649	181.726	166.489	142.452	176.81	266.373	277.504	279.315
ENSMUSG00000030877	3.45764	2.76887	2.97192	1.79418	19.1243	11.5387	10.1205	-0.806358	0.00136134	0.0121857	Mfsd13b	7	120982509	121014787	+	1971	protein_coding	major facilitator superfamily domain containing 13B [Source:MGI Symbol;Acc:MGI:1921716]	-	3	3	3	2	20	11	10	0.19424	0.164187	0.184692	0.105685	1.03998	0.627469	0.536306
ENSMUSG00000107944	5.76273	20.305	11.8877	13.4564	32.5113	36.7141	31.3736	-0.804535	0.00179963	0.0150353	Gm44280	6	113416472	113419582	+	3111	TEC	predicted gene, 44280 [Source:MGI Symbol;Acc:MGI:5690672]	-	5	22	12	15	34	35	31	0.109264	0.406378	0.249343	0.267525	0.596713	0.67384	0.561131
ENSMUSG00000029442	419.527	359.03	379.416	400.999	652.139	718.547	719.568	-0.804163	1.51355e-14	1.62355e-12	Wdr66	5	123252102	123327484	+	8961	protein_coding	WD repeat domain 66 [Source:MGI Symbol;Acc:MGI:1918495]	-	364	389	383	447	682	685	711	9.5693	8.64428	9.57383	9.59075	14.3993	15.8654	15.4826
ENSMUSG00000038070	821.766	754.055	648.87	769.704	1278.46	1267.16	1471.52	-0.803522	3.7376e-14	3.80539e-12	Cntln	4	84884309	85131921	+	7102	protein_coding	centlein, centrosomal protein [Source:MGI Symbol;Acc:MGI:2443104]	-	713	817	655	858	1337	1208	1454	12.6165	12.22	11.0204	12.3909	19.0003	18.8321	21.3113
ENSMUSG00000097832	4.61019	24.9198	13.869	19.736	70.76	32.5182	32.3856	-0.803409	0.00211438	0.0171097	Gm26912	12	110842276	110845216	-	1483	lincRNA	predicted gene, 26912 [Source:MGI Symbol;Acc:MGI:5477406]	-	4	27	14	22	74	31	32	0.183369	1.04624	0.610242	0.823105	2.72444	1.25201	1.2151
ENSMUSG00000108784	20.7458	8.3066	19.8128	8.07381	21.0367	38.812	60.723	-0.801575	0.00216862	0.0174545	4930517G19Rik	6	91689933	91691608	-	1676	TEC	RIKEN cDNA 4930517G19 gene [Source:MGI Symbol;Acc:MGI:1921977]	-	18	9	20	9	22	37	60	0.73014	0.308586	0.771385	0.297949	0.716696	1.32226	2.01595
ENSMUSG00000027323	27.6611	42.456	42.5976	26.9127	80.3221	75.5261	60.723	-0.801484	0.000302725	0.00357497	Rad51	2	119112793	119147445	+	6649	protein_coding	RAD51 recombinase [Source:MGI Symbol;Acc:MGI:97890]	-	24	46	43	30	84	72	60	1.03332	1.67411	1.76036	1.05417	2.90458	2.73111	2.13979
ENSMUSG00000080880	9.22038	3.69182	1.98128	2.69127	14.3432	28.3223	13.1567	-0.801025	0.00171196	0.0144978	Gm14278	2	156888854	156915383	-	878	unprocessed_pseudogene	predicted gene 14278 [Source:MGI Symbol;Acc:MGI:3650108]	-	8	4	2	3	15	27	13	0.619445	0.261802	0.147248	0.189583	0.932788	1.84187	0.833779
ENSMUSG00000085623	31.1188	37.8412	26.7473	31.3982	33.4676	76.575	111.326	-0.800222	0.00127509	0.0115819	Gm16041	1	4970857	4976820	+	3725	antisense	predicted gene 16041 [Source:MGI Symbol;Acc:MGI:3801909]	-	27	41	27	35	35	73	110	0.492771	0.632507	0.468547	0.521333	0.513013	1.17378	1.66291
ENSMUSG00000024210	102.577	86.7578	72.3168	104.062	152.995	198.256	165.976	-0.800139	4.10797e-06	8.9733e-05	Ip6k3	17	27143969	27167764	-	2307	protein_coding	inositol hexaphosphate kinase 3 [Source:MGI Symbol;Acc:MGI:3045325]	-	89	94	73	116	160	189	164	2.62271	2.34147	2.04546	2.78987	3.78668	4.90685	4.00312
ENSMUSG00000085379	64.5426	47.0707	59.4385	74.4585	117.615	123.779	112.338	-0.799148	2.1551e-05	0.000381129	2310058D17Rik	11	58965748	58978050	-	3201	processed_transcript	RIKEN cDNA 2310058D17 gene [Source:MGI Symbol;Acc:MGI:1922944]	-	56	51	60	83	123	118	111	1.18935	0.915572	1.21166	1.43869	2.098	2.20793	1.95272
ENSMUSG00000097564	4.61019	6.46069	8.91577	5.38254	14.3432	18.8815	28.3374	-0.798828	0.00226597	0.0180287	C430014B12Rik	1	82691928	82725169	-	4343	processed_transcript	RIKEN cDNA C430014B12 gene [Source:MGI Symbol;Acc:MGI:2444820]	-	4	7	9	6	15	18	28	0.16206	0.239725	0.34671	0.198396	0.488074	0.642494	0.939655
ENSMUSG00000054910	127.933	126.445	102.036	109.445	205.586	197.207	239.856	-0.797121	2.21278e-07	6.51578e-06	4931415C17Rik	8	12672186	12679229	+	2959	processed_transcript	RIKEN cDNA 4931415C17 gene [Source:MGI Symbol;Acc:MGI:1918216]	-	111	137	103	122	215	188	237	4.24184	4.4254	3.74263	3.80502	6.59856	6.32952	7.50196
ENSMUSG00000089742	50.7121	49.8396	49.5321	56.5167	122.396	103.848	76.9158	-0.796669	6.93437e-05	0.00103021	Gm15898	8	120095060	120097736	+	627	antisense	predicted gene 15898 [Source:MGI Symbol;Acc:MGI:3802167]	-	44	54	50	63	128	99	76	4.77081	4.94919	5.15487	5.57502	11.1462	9.45706	6.82572
ENSMUSG00000035517	3990.12	4207.75	3034.33	3800.97	7035.84	6476.36	6576.3	-0.796318	1.62947e-13	1.47561e-11	Tdrd7	4	45965334	46034761	+	3958	protein_coding	tudor domain containing 7 [Source:MGI Symbol;Acc:MGI:2140279]	-	3462	4559	3063	4237	7358	6174	6498	134.185	149.365	112.884	134.03	229.043	210.827	208.618
ENSMUSG00000084834	34.5764	35.0723	40.6163	49.34	66.9351	91.2607	81.9761	-0.795832	0.00015971	0.00209472	4930565N06Rik	16	36880519	36897189	-	2416	antisense	RIKEN cDNA 4930565N06 gene [Source:MGI Symbol;Acc:MGI:1915556]	-	30	38	41	55	70	87	81	0.844174	0.903846	1.09699	1.2631	1.58193	2.1568	1.88795
ENSMUSG00000027530	1326.58	1482.27	1289.81	1386	2327.43	2410.54	2500.78	-0.793894	9.76372e-22	2.44378e-19	Fabp12	3	10244209	10301183	-	2787	protein_coding	fatty acid binding protein 12 [Source:MGI Symbol;Acc:MGI:1922747]	-	1151	1606	1302	1545	2434	2298	2471	69.8035	82.328	75.0794	76.4709	118.55	122.782	124.128
ENSMUSG00000084826	954.309	1434.27	1118.43	953.607	2472.77	2118.93	1552.49	-0.791358	3.63156e-07	1.00178e-05	AI847159	2	129158666	129180667	-	1574	antisense	expressed sequence AI847159 [Source:MGI Symbol;Acc:MGI:3528181]	-	828	1554	1129	1063	2586	2020	1534	77.0053	122.164	99.8371	80.6844	193.151	165.509	118.171
ENSMUSG00000046049	9898.07	8984.97	6923.59	9729.84	14269.6	15242.6	18230.1	-0.790712	2.04373e-10	1.04929e-08	Rp1l1	14	63992506	64035025	+	7573	protein_coding	retinitis pigmentosa 1 homolog like 1 [Source:MGI Symbol;Acc:MGI:2384303]	-	8588	9735	6989	10846	14923	14531	18013	138.78	132.975	107.389	143.044	193.673	206.877	241.11
ENSMUSG00000038115	1198.65	1146.31	977.763	1019.99	1793.86	1924.87	2030.17	-0.790133	1.15634e-15	1.49916e-13	Ano2	6	125690419	126040126	+	5385	protein_coding	anoctamin 2 [Source:MGI Symbol;Acc:MGI:2387214]	-	1040	1242	987	1137	1876	1835	2006	28.683	28.9543	25.8831	25.5928	41.553	44.5869	45.8265
ENSMUSG00000006784	119.865	133.829	129.774	160.579	216.105	310.496	229.735	-0.788966	1.46887e-06	3.56746e-05	Ttc25	11	100545607	100572568	+	6147	protein_coding	tetratricopeptide repeat domain 25 [Source:MGI Symbol;Acc:MGI:1921657]	-	104	145	131	179	226	296	227	3.40248	4.00987	4.07513	4.77948	5.93812	8.53168	6.15152
ENSMUSG00000109956	6.91528	2.76887	0.990641	4.48545	15.2995	15.7346	16.1928	-0.788898	0.00202057	0.0164913	Gm45428	8	91305967	91307755	-	1789	TEC	predicted gene 45428 [Source:MGI Symbol;Acc:MGI:5791264]	-	6	3	1	5	16	15	16	0.228007	0.0963649	0.0361331	0.155072	0.48831	0.502192	0.50363
ENSMUSG00000102336	76.0681	65.5298	84.2045	88.812	111.877	152.101	188.241	-0.788547	3.7812e-05	0.000616661	Gm37233	1	34427002	34433264	-	6263	lincRNA	predicted gene, 37233 [Source:MGI Symbol;Acc:MGI:5610461]	-	66	71	85	99	117	145	186	0.716422	0.651454	0.877308	0.877054	1.01998	1.38667	1.67237
ENSMUSG00000113940	134.848	149.519	120.858	118.416	211.324	263.292	241.88	-0.788432	1.58377e-07	4.86221e-06	Gm40477	12	85429110	85436249	-	1119	lincRNA	predicted gene, 40477 [Source:MGI Symbol;Acc:MGI:5623362]	-	117	162	122	132	221	251	239	11.0782	12.9658	10.9838	10.2005	16.8056	20.9381	18.7446
ENSMUSG00000032420	2214.04	2401.53	1787.12	2025.63	3956.82	3712.32	3511.82	-0.788155	7.37125e-14	7.25887e-12	Nt5e	9	88327197	88372092	+	8602	protein_coding	5' nucleotidase, ecto [Source:MGI Symbol;Acc:MGI:99782]	-	1921	2602	1804	2258	4138	3539	3470	49.6568	56.8538	44.34	47.6367	85.9055	80.596	74.2978
ENSMUSG00000083356	12.678	24.9198	12.8783	23.3244	31.5551	48.2528	50.6025	-0.787412	0.0016999	0.0144296	Gm11708	11	107003909	107004740	-	832	processed_pseudogene	predicted gene 11708 [Source:MGI Symbol;Acc:MGI:3649475]	-	11	27	13	26	33	46	50	0.898828	1.86487	1.01003	1.7339	2.16559	3.31149	3.38415
ENSMUSG00000028125	21129.6	17183.6	14258.3	18692.7	26666.9	31859.4	37332.5	-0.785852	2.37893e-09	1.0111e-07	Abca4	3	122044443	122180123	+	12022	protein_coding	ATP-binding cassette, sub-family A (ABC1), member 4 [Source:MGI Symbol;Acc:MGI:109424]	-	18333	18618	14393	20837	27888	30372	36888	597.198	512.647	445.804	553.97	729.594	871.645	995.325
ENSMUSG00000032221	159.051	127.368	113.924	153.402	218.973	253.851	288.434	-0.785816	7.53276e-07	1.93373e-05	Mns1	9	72438011	72462025	+	5363	protein_coding	meiosis-specific nuclear structural protein 1 [Source:MGI Symbol;Acc:MGI:107933]	-	138	138	115	171	229	242	285	4.09507	3.46148	3.2448	4.14137	5.45754	6.32672	7.00523
ENSMUSG00000097357	27.6611	28.6116	34.6724	34.0894	59.2854	54.5466	76.9158	-0.785603	0.000377396	0.00431265	Gm16793	8	35582503	35588972	-	1680	bidirectional_promoter_lncRNA	predicted gene, 16793 [Source:MGI Symbol;Acc:MGI:4439717]	-	24	31	35	38	62	52	76	0.971202	1.06038	1.34671	1.25501	2.01497	1.85388	2.54746
ENSMUSG00000116733	33.4239	35.9953	28.7286	40.3691	79.3659	83.9178	49.5905	-0.784215	0.000463013	0.00510022	AC125396.2	16	23127793	23128922	+	1130	bidirectional_promoter_lncRNA	novel transcript	-	29	39	29	45	83	80	49	1.74473	1.98333	1.65896	2.20957	4.01038	4.24033	2.44186
ENSMUSG00000031293	28978.5	25833.5	20755.9	26909.1	42577.4	44361.1	48837.5	-0.783635	7.35468e-13	5.89061e-11	Rs1	X	160768013	160799663	+	5840	protein_coding	retinoschisis (X-linked, juvenile) 1 (human) [Source:MGI Symbol;Acc:MGI:1336189]	-	25143	27990	20952	29996	44527	42290	48256	703.715	662.191	557.588	685.187	1000.88	1042.79	1118.73
ENSMUSG00000025900	26427.9	21355.3	18444.7	22852.5	35775.9	39318.7	43213.5	-0.782542	1.08071e-11	7.00555e-10	Rp1	1	3999557	4409241	-	12311	protein_coding	retinitis pigmentosa 1 (human) [Source:MGI Symbol;Acc:MGI:1341105]	-	22930	23138	18619	25474	37414	37483	42699	417.258	355.899	322.155	378.324	546.781	600.919	643.596
ENSMUSG00000040694	44.9493	46.1478	29.7192	30.5011	93.7092	71.3302	63.7592	-0.781546	0.000410396	0.00462524	Apobec2	17	48419231	48432930	-	1597	protein_coding	apolipoprotein B mRNA editing enzyme, catalytic polypeptide 2 [Source:MGI Symbol;Acc:MGI:1343178]	-	39	50	30	34	98	68	63	3.05459	3.31023	2.23417	2.17336	6.16443	4.69221	4.08717
ENSMUSG00000036395	2887.13	3353.1	2498.4	2605.15	5769.81	5037.17	4291.09	-0.780647	1.20282e-10	6.35663e-09	Glb1l2	9	26763044	26806468	-	9043	protein_coding	galactosidase, beta 1-like 2 [Source:MGI Symbol;Acc:MGI:2388283]	-	2505	3633	2522	2904	6034	4802	4240	75.1214	92.092	71.9132	71.0753	145.325	126.87	105.321
ENSMUSG00000096351	4362.39	5137.17	4393.49	4348.2	8497.89	8307.87	7148.11	-0.780588	1.93449e-16	2.72354e-14	Samd11	4	156246966	156255657	-	3588	protein_coding	sterile alpha motif domain containing 11 [Source:MGI Symbol;Acc:MGI:2446220]	-	3785	5566	4435	4847	8887	7920	7063	158.351	196.833	176.423	165.498	298.599	291.918	244.759
ENSMUSG00000026819	1928.21	2228.01	1706.87	1848.01	3647.96	3480.49	3040.2	-0.779052	2.42501e-13	2.12141e-11	Slc25a25	2	32414487	32451445	-	7862	protein_coding	solute carrier family 25 (mitochondrial carrier, phosphate carrier), member 25 [Source:MGI Symbol;Acc:MGI:1915913]	-	1673	2414	1723	2060	3815	3318	3004	60.1149	73.3203	58.868	60.4115	110.093	105.037	89.409
ENSMUSG00000028909	720.342	831.583	635.001	659.362	1159.89	1328	1275.18	-0.778797	2.69333e-12	1.96504e-10	Ptpru	4	131768457	131838288	-	7113	protein_coding	protein tyrosine phosphatase, receptor type, U [Source:MGI Symbol;Acc:MGI:1321151]	-	625	901	641	735	1213	1266	1260	17.0986	20.8356	16.6743	16.411	26.6514	30.5138	28.5527
ENSMUSG00000044768	1451.06	1614.25	1385.91	1473.02	2676.45	2571.03	2480.54	-0.77735	1.50822e-20	3.36061e-18	D1Ertd622e	1	97606318	97662074	-	41324	protein_coding	DNA segment, Chr 1, ERATO Doi 622, expressed [Source:MGI Symbol;Acc:MGI:1277184]	-	1259	1749	1399	1642	2799	2451	2451	7.25172	8.5154	7.66197	7.71888	12.9478	12.4377	11.6937
ENSMUSG00000103143	28.8137	32.3034	28.7286	24.2214	47.8108	48.2528	82.9881	-0.772471	0.000972076	0.00930807	Gm37742	2	13036126	13040104	+	3979	TEC	predicted gene, 37742 [Source:MGI Symbol;Acc:MGI:5610970]	-	25	35	29	27	50	46	82	0.427143	0.505478	0.471129	0.376499	0.686092	0.692425	1.16049
ENSMUSG00000018648	127.933	183.668	169.4	170.447	329.894	290.566	261.109	-0.770791	3.15612e-07	8.85925e-06	Dusp14	11	84048041	84069261	-	1945	protein_coding	dual specificity phosphatase 14 [Source:MGI Symbol;Acc:MGI:1927168]	-	111	199	171	190	345	277	258	6.02735	9.13391	8.82891	8.42021	15.0453	13.2515	11.6043
ENSMUSG00000051977	587.799	458.709	463.62	523.004	715.249	936.733	1063.67	-0.770507	2.60588e-08	9.24422e-07	Prdm9	17	15543079	15564354	-	4308	protein_coding	PR domain containing 9 [Source:MGI Symbol;Acc:MGI:2384854]	zf-C2H2	510	497	468	583	748	893	1051	21.5353	17.7394	18.7904	20.0917	25.3666	33.2211	36.7603
ENSMUSG00000047034	1814.11	2143.1	1957.51	2113.55	3787.57	3606.37	3088.78	-0.770176	5.09858e-15	5.92785e-13	Ankrd33	15	101115755	101120040	+	1836	protein_coding	ankyrin repeat domain 33 [Source:MGI Symbol;Acc:MGI:2443398]	-	1574	2322	1976	2356	3961	3438	3052	110.089	137.279	131.412	134.488	222.497	211.85	176.816
ENSMUSG00000105351	23.0509	18.4591	20.8035	22.4273	33.4676	39.861	66.7953	-0.770058	0.00171511	0.0145108	Gm43157	3	122152208	122152619	-	412	processed_pseudogene	predicted gene 43157 [Source:MGI Symbol;Acc:MGI:5663294]	-	20	20	21	25	35	38	66	3.3002	2.78959	3.29486	3.36679	4.63828	5.52427	9.02088
ENSMUSG00000025997	426.442	339.648	342.762	364.219	588.073	676.588	672.002	-0.768891	5.16068e-11	2.89721e-09	Ikzf2	1	69531214	69687245	-	11613	protein_coding	IKAROS family zinc finger 2 [Source:MGI Symbol;Acc:MGI:1342541]	zf-C2H2	370	368	346	406	615	645	664	10.2544	8.62101	9.11788	9.18337	13.6888	15.7489	15.2431
ENSMUSG00000054321	281.221	282.424	265.492	284.378	611.022	532.878	359.278	-0.767252	6.46557e-07	1.68376e-05	Taf4b	18	14783245	14900359	+	5149	protein_coding	TATA-box binding protein associated factor 4b [Source:MGI Symbol;Acc:MGI:2152345]	-	244	306	268	317	639	508	355	3.22162	3.41512	3.36455	3.41594	6.77586	5.90921	3.88247
ENSMUSG00000022114	633.901	480.86	476.498	655.773	882.587	900.019	1231.67	-0.767163	1.77047e-07	5.38038e-06	Spry2	14	105891947	105896819	-	2087	protein_coding	sprouty RTK signaling antagonist 2 [Source:MGI Symbol;Acc:MGI:1345138]	-	550	521	481	731	923	858	1217	17.9163	14.3457	14.8983	19.4343	24.1471	24.6237	32.8375
ENSMUSG00000112442	51.8646	18.4591	31.7005	30.5011	52.5919	77.624	80.964	-0.766625	0.00144777	0.0127519	Gm47992	10	78298315	78300301	+	1987	TEC	predicted gene, 47992 [Source:MGI Symbol;Acc:MGI:6097287]	-	45	20	32	34	55	74	80	1.53965	0.578416	1.04104	0.949412	1.5113	2.2306	2.26722
ENSMUSG00000102925	23.0509	16.6132	10.8971	17.9418	36.3362	44.0569	34.4097	-0.766465	0.00205627	0.016707	Gm37150	9	72384389	72387142	+	2754	TEC	predicted gene, 37150 [Source:MGI Symbol;Acc:MGI:5610378]	-	20	18	11	20	38	42	34	0.493712	0.375592	0.258193	0.402939	0.753366	0.913427	0.695212
ENSMUSG00000039763	494.443	439.327	403.191	475.458	813.74	817.15	734.749	-0.765367	8.47157e-13	6.72538e-11	Dnajc28	16	91614254	91619026	-	3565	protein_coding	DnaJ heat shock protein family (Hsp40) member C28 [Source:MGI Symbol;Acc:MGI:2181053]	-	429	476	407	530	851	779	726	14.1647	13.2849	12.7777	14.2821	22.5663	22.6605	19.8556
ENSMUSG00000030402	1154.85	1757.31	1284.86	1255.03	2719.48	2635.02	1936.05	-0.764838	1.20643e-07	3.80089e-06	Ppm1n	7	19276805	19280064	-	2234	protein_coding	protein phosphatase, Mg2+/Mn2+ dependent, 1N (putative) [Source:MGI Symbol;Acc:MGI:2142330]	-	1002	1904	1297	1399	2844	2512	1913	77.5855	124.618	95.4906	88.409	176.857	171.362	122.694
ENSMUSG00000108423	85.2885	75.6823	78.2607	80.7381	106.14	156.297	186.217	-0.763021	5.69119e-05	0.000871376	Gm44856	7	126806257	126806560	+	304	processed_pseudogene	predicted gene 44856 [Source:MGI Symbol;Acc:MGI:5753432]	-	74	82	79	90	111	149	184	16.5488	15.5006	16.7984	16.4264	19.9359	29.3563	34.0837
ENSMUSG00000105860	3.45764	4.61478	2.97192	8.07381	9.56216	25.1754	19.229	-0.761163	0.00311436	0.0232108	Gm42578	3	95352784	95352977	+	194	processed_pseudogene	predicted gene 42578 [Source:MGI Symbol;Acc:MGI:5662715]	-	3	5	3	9	10	24	19	1.0513	1.48107	0.99962	2.57403	2.81439	7.40966	5.51511
ENSMUSG00000065593	1.15255	10.1525	8.91577	9.868	23.9054	30.4202	17.2049	-0.760589	0.00360669	0.0258434	Mir339	5	139369650	139369745	-	96	miRNA	microRNA 339 [Source:MGI Symbol;Acc:MGI:3619354]	-	1	11	9	11	25	29	17	0.708168	6.5846	6.0602	6.35763	14.2185	18.0932	9.97195
ENSMUSG00000001211	24382.1	24073.4	19054	23630.3	39357.8	37758.8	40847.4	-0.759806	2.71279e-15	3.23756e-13	Agpat3	10	78269178	78352489	-	7790	protein_coding	1-acylglycerol-3-phosphate O-acyltransferase 3 [Source:MGI Symbol;Acc:MGI:1336186]	-	21155	26083	19234	26341	41160	35996	40361	720.543	750.939	622.909	732.226	1125.9	1080.15	1138.69
ENSMUSG00000085105	35.729	42.456	51.5133	40.3691	60.2416	109.093	82.9881	-0.759781	0.000513126	0.00555045	Gm12758	7	34234377	34240207	+	5232	antisense	predicted gene 12758 [Source:MGI Symbol;Acc:MGI:3702543]	-	31	46	52	45	63	104	82	0.797392	1.00016	1.27181	0.944689	1.30146	2.35681	1.74711
ENSMUSG00000023979	15416.5	20857.9	14115.6	15716.1	33735.3	28282.4	25141.4	-0.759658	6.29997e-09	2.4952e-07	Guca1b	17	47385393	47392967	+	2441	protein_coding	guanylate cyclase activator 1B [Source:MGI Symbol;Acc:MGI:1194489]	-	13376	22599	14249	17519	35280	26962	24842	564.116	805.623	571.393	603.001	1194.95	1001.79	867.808
ENSMUSG00000032702	1055.73	951.567	771.709	922.209	1552.89	1556.68	1707.33	-0.759402	4.20685e-12	2.91583e-10	Kank1	19	25236975	25434496	+	6166	protein_coding	KN motif and ankyrin repeat domains 1 [Source:MGI Symbol;Acc:MGI:2147707]	-	916	1031	779	1028	1624	1484	1687	23.4375	22.2985	18.9523	21.4672	33.3719	33.4527	35.7541
ENSMUSG00000034783	16.1357	3.69182	9.90641	8.07381	32.5113	27.2733	19.229	-0.758118	0.00379713	0.0268135	Cd207	6	83671215	83677857	-	1522	protein_coding	CD207 antigen [Source:MGI Symbol;Acc:MGI:2180021]	-	14	4	10	9	34	26	19	0.625347	0.151027	0.424718	0.328096	1.21969	1.02317	0.702977
ENSMUSG00000052085	107.187	73.8364	87.1764	78.944	152.038	165.738	152.82	-0.757527	8.37978e-06	0.00016668	Dock8	19	24999529	25202432	+	7810	protein_coding	dedicator of cytokinesis 8 [Source:MGI Symbol;Acc:MGI:1921396]	-	93	80	88	88	159	158	151	0.809542	0.588636	0.728361	0.62518	1.11156	1.2117	1.08875
ENSMUSG00000097387	19.5933	16.6132	20.8035	20.6331	41.1173	44.0569	37.4459	-0.755887	0.00158992	0.0137485	4930563E18Rik	18	10706860	10711832	+	1553	lincRNA	RIKEN cDNA 4930563E18 gene [Source:MGI Symbol;Acc:MGI:1922620]	-	17	18	21	23	43	42	37	0.744192	0.666053	0.874104	0.821731	1.51176	1.61982	1.34163
ENSMUSG00000035455	2.30509	12.9214	16.8409	16.1476	31.5551	23.0774	47.5664	-0.755042	0.00393897	0.0275453	Fignl1	11	11787431	11808962	-	4839	protein_coding	fidgetin-like 1 [Source:MGI Symbol;Acc:MGI:1890648]	-	2	14	17	18	33	22	47	0.0640152	0.378775	0.51738	0.47021	0.848293	0.620378	1.24608
ENSMUSG00000026669	64.5426	79.3742	54.4853	61.8992	124.308	121.681	113.35	-0.75468	3.58815e-05	0.00059052	Mcm10	2	4989714	5012791	-	7692	protein_coding	minichromosome maintenance 10 replication initiation factor [Source:MGI Symbol;Acc:MGI:1917274]	-	56	86	55	69	130	116	112	2.08609	2.70797	1.94812	2.09778	3.88926	3.80701	3.45587
ENSMUSG00000030346	18.4408	28.6116	25.7567	26.0156	37.2924	51.3997	67.8074	-0.754366	0.00159788	0.0137941	Rad51ap1	6	126923050	126939587	-	4813	protein_coding	RAD51 associated protein 1 [Source:MGI Symbol;Acc:MGI:1098224]	-	16	31	26	29	39	49	67	0.992469	1.6254	1.53348	1.46812	1.94286	2.67777	3.44244
ENSMUSG00000054752	2399.6	2301.85	1889.15	2295.65	3333.37	4150.79	4026.95	-0.753163	3.58381e-12	2.55272e-10	Fsd1l	4	53631471	53707009	+	9739	protein_coding	fibronectin type III and SPRY domain containing 1-like [Source:MGI Symbol;Acc:MGI:2442443]	-	2082	2494	1907	2559	3486	3957	3979	46.4075	46.9899	40.4172	46.5526	62.4042	77.706	73.4643
ENSMUSG00000032578	48.407	64.6069	66.373	54.7225	104.228	136.366	90.0725	-0.752901	0.000140041	0.00187096	Cish	9	107296026	107302784	+	6419	protein_coding	cytokine inducible SH2-containing protein [Source:MGI Symbol;Acc:MGI:103159]	-	42	70	67	61	109	130	89	1.28967	1.81689	1.9562	1.52871	2.68804	3.51685	2.26368
ENSMUSG00000034829	4275.95	4473.57	3649.52	4262.08	7254.81	7054.34	7043.87	-0.751738	1.69688e-18	2.91233e-16	Nxnl1	8	71560555	71566601	-	2730	protein_coding	nucleoredoxin-like 1 [Source:MGI Symbol;Acc:MGI:1924446]	-	3710	4847	3684	4751	7587	6725	6960	100.607	111.103	94.9906	105.149	165.235	160.667	156.335
ENSMUSG00000103621	25.356	36.9182	24.766	26.0156	36.3362	55.5956	92.0966	-0.751362	0.00222323	0.0177987	Gm38366	9	108530832	108532765	+	1934	TEC	predicted gene, 38366 [Source:MGI Symbol;Acc:MGI:5611594]	-	22	40	25	29	38	53	91	0.773346	1.18853	0.835601	0.831984	1.07279	1.64138	2.64964
ENSMUSG00000089709	224.747	254.736	238.745	328.335	357.625	490.919	559.664	-0.750509	3.707e-06	8.17795e-05	Gm16262	9	94695704	94702319	-	1751	antisense	predicted gene 16262 [Source:MGI Symbol;Acc:MGI:3826533]	-	195	276	241	366	374	468	553	7.57105	9.05797	8.89705	11.5976	11.662	16.0084	17.7845
ENSMUSG00000089726	46.1019	74.7594	62.4104	44.8545	120.483	115.387	89.0604	-0.748633	0.000262459	0.00316372	Mir17hg	14	115042879	115046727	+	3536	lincRNA	Mir17 host gene (non-protein coding) [Source:MGI Symbol;Acc:MGI:1923207]	-	40	81	63	50	126	110	88	0.769051	1.31638	1.15171	0.784569	1.94556	1.86324	1.40143
ENSMUSG00000054717	598.172	892.498	711.28	599.256	1601.66	1208.42	945.255	-0.747262	4.42585e-06	9.55188e-05	Hmgb2	8	57511907	57515999	+	3003	protein_coding	high mobility group box 2 [Source:MGI Symbol;Acc:MGI:96157]	HMG	519	967	718	668	1675	1152	934	28.593	45.0318	37.6118	30.0355	74.1116	55.9147	42.622
ENSMUSG00000054792	4819.95	5013.49	4285.51	4642.44	8083.85	7875.69	7904.11	-0.745238	4.25209e-22	1.14386e-19	Klhl18	9	110425926	110476694	-	7021	protein_coding	kelch-like 18 [Source:MGI Symbol;Acc:MGI:2143315]	-	4182	5432	4326	5175	8454	7508	7810	93.4307	102.581	91.8967	94.3587	151.686	147.778	144.528
ENSMUSG00000109257	6.91528	2.76887	4.95321	12.5593	12.4308	15.7346	48.5784	-0.745106	0.00361502	0.0258825	Gm45200	7	92778505	92779423	+	919	TEC	predicted gene 45200 [Source:MGI Symbol;Acc:MGI:5753776]	-	6	3	5	14	13	15	48	0.443857	0.187592	0.351698	0.845252	0.77235	0.977607	2.94122
ENSMUSG00000087192	21.8984	17.5362	21.7941	26.9127	46.8546	66.0853	30.3615	-0.744833	0.00253646	0.0196939	4930412L05Rik	4	53205066	53217857	-	1615	processed_transcript	RIKEN cDNA 4930412L05 gene [Source:MGI Symbol;Acc:MGI:1921191]	-	19	19	22	30	49	63	30	1.35683	1.1469	1.49383	1.74847	2.81025	3.96362	1.77454
ENSMUSG00000028766	2744.21	2787.33	2266.59	2526.21	4228.39	4360.58	4599.77	-0.744273	3.83513e-16	5.15768e-14	Alpl	4	137741733	137796384	-	4033	protein_coding	alkaline phosphatase, liver/bone/kidney [Source:MGI Symbol;Acc:MGI:87983]	-	2381	3020	2288	2816	4422	4157	4545	204.382	219.124	186.744	197.279	304.846	314.372	323.155
ENSMUSG00000037148	713.427	715.29	564.665	696.142	1080.52	1245.13	1137.54	-0.744155	9.61429e-12	6.32333e-10	Arhgap10	8	77250366	77517953	-	3084	protein_coding	Rho GTPase activating protein 10 [Source:MGI Symbol;Acc:MGI:1925764]	-	619	775	570	776	1130	1187	1124	16.6398	17.6101	14.5694	17.025	24.3959	28.1119	25.0276
ENSMUSG00000097784	65.6952	104.294	95.1015	74.4585	164.469	168.885	132.579	-0.743842	5.00026e-05	0.000782881	A430105J06Rik	1	186749396	186752921	+	1275	lincRNA	RIKEN cDNA A430105J06 gene [Source:MGI Symbol;Acc:MGI:1924439]	-	57	113	96	83	172	161	131	3.03929	5.09303	4.86717	3.61195	7.36554	7.56318	5.7858
ENSMUSG00000015133	76.0681	58.1462	62.4104	91.5032	126.22	134.269	134.603	-0.743513	5.68061e-05	0.000871236	Lrrk1	7	66226912	66388350	-	10307	protein_coding	leucine-rich repeat kinase 1 [Source:MGI Symbol;Acc:MGI:2142227]	-	66	63	63	102	132	128	133	1.78266	1.43835	1.61798	2.24849	2.86337	3.0459	2.97557
ENSMUSG00000096917	36.8815	65.5298	49.5321	46.6487	107.096	96.5055	79.952	-0.743504	0.000341964	0.00395541	2500002B13Rik	8	57488054	57508877	+	2712	processed_transcript	RIKEN cDNA 2500002B13 gene [Source:MGI Symbol;Acc:MGI:1925603]	-	32	71	50	52	112	92	79	1.49211	2.79839	2.21681	1.97888	4.19418	3.77937	3.05121
ENSMUSG00000044362	56.4748	77.5283	75.2887	75.3556	136.739	154.199	102.217	-0.741234	8.86812e-05	0.00126434	Ccdc89	7	90426577	90428669	+	2093	protein_coding	coiled-coil domain containing 89 [Source:MGI Symbol;Acc:MGI:1917304]	-	49	84	76	84	143	147	101	1.5916	2.30631	2.34725	2.22681	3.73038	4.20665	2.71741
ENSMUSG00000111662	152.136	135.674	153.549	159.682	174.031	356.651	294.507	-0.741194	7.26511e-05	0.00107491	Gm7435	9	55938252	55952409	+	2892	transcribed_processed_pseudogene	predicted gene 7435 [Source:MGI Symbol;Acc:MGI:3646489]	-	132	147	155	178	182	340	291	6.16763	5.8058	6.88627	6.78782	6.82959	13.996	11.2624
ENSMUSG00000102375	254.713	643.3	362.575	317.57	1395.12	1109.81	523.23	-0.741042	0.00451512	0.030667	A930036K24Rik	9	107680082	107681281	+	1200	TEC	RIKEN cDNA A930036K24 gene [Source:MGI Symbol;Acc:MGI:1925079]	-	221	697	366	354	1459	1058	517	12.5204	33.3779	19.7158	16.368	66.3835	52.8072	24.2612
ENSMUSG00000026121	171.729	218.74	171.381	167.756	356.669	314.692	284.386	-0.737688	3.01422e-07	8.52735e-06	Sema4c	1	36548639	36558349	-	4593	protein_coding	sema domain, immunoglobulin domain (Ig), transmembrane domain (TM) and short cytoplasmic domain, (semaphorin) 4C [Source:MGI Symbol;Acc:MGI:109252]	-	149	237	173	187	373	300	281	4.6573	6.26177	5.14165	4.77041	9.36345	8.26134	7.27527
ENSMUSG00000097170	150.984	107.063	112.933	130.078	171.163	224.48	281.35	-0.737445	3.60698e-05	0.000593079	Gm16982	7	141610066	141613747	-	2620	antisense	predicted gene, 16982 [Source:MGI Symbol;Acc:MGI:4439906]	-	131	116	114	145	179	214	278	3.39921	2.54428	2.81267	3.07072	3.73025	4.89216	5.97511
ENSMUSG00000071636	104.882	102.448	114.914	117.519	147.257	229.725	213.543	-0.735496	1.83056e-05	0.000329226	Rimbp3	16	17208603	17213982	+	5380	protein_coding	RIMS binding protein 3 [Source:MGI Symbol;Acc:MGI:2685449]	-	91	111	116	131	154	219	211	1.14992	1.18563	1.39377	1.35102	1.56288	2.43809	2.20853
ENSMUSG00000097174	48.407	23.9968	34.6724	35.8836	68.8475	90.2117	53.6387	-0.734894	0.00143406	0.0126745	Gm4890	8	79295123	79308961	+	3784	bidirectional_promoter_lncRNA	predicted gene 4890 [Source:MGI Symbol;Acc:MGI:3779445]	-	42	26	35	40	72	86	53	1.38743	0.725999	1.09936	1.07842	1.91018	2.50289	1.45022
ENSMUSG00000024842	2001.97	3015.3	2353.76	2231.06	4647.21	4098.34	3666.66	-0.734105	1.33629e-08	4.97547e-07	Cabp4	19	4135425	4139609	-	1431	protein_coding	calcium binding protein 4 [Source:MGI Symbol;Acc:MGI:1920910]	-	1737	3267	2376	2487	4860	3907	3623	82.5216	131.195	107.33	96.4294	185.431	163.528	142.571
ENSMUSG00000100465	27.6611	43.3789	31.7005	33.1923	71.7162	77.624	50.6025	-0.733752	0.00105622	0.00996029	Gm29264	5	149234816	149247682	-	1264	lincRNA	predicted gene 29264 [Source:MGI Symbol;Acc:MGI:5579970]	-	24	47	32	37	75	74	50	1.29084	2.13677	1.63651	1.62416	3.23967	3.50649	2.22754
ENSMUSG00000108923	56.4748	35.0723	53.4946	56.5167	68.8475	101.75	118.41	-0.733581	0.000682634	0.00702327	4933431C10Rik	7	6136430	6137695	+	1266	TEC	RIKEN cDNA 4933431C10 gene [Source:MGI Symbol;Acc:MGI:1918572]	-	49	38	54	63	72	97	117	2.6313	1.72488	2.75725	2.76109	3.10517	4.58909	5.20421
ENSMUSG00000103135	14.9831	19.3821	15.8503	17.9418	30.5989	34.6161	44.5302	-0.732088	0.0030167	0.0226422	Gm37979	3	19143188	19143899	-	712	TEC	predicted gene, 37979 [Source:MGI Symbol;Acc:MGI:5611207]	-	13	21	16	20	32	33	44	1.24128	1.69491	1.45263	1.55856	2.4539	2.77602	3.47997
ENSMUSG00000078773	65.6952	57.2232	59.4385	58.3109	104.228	120.632	100.193	-0.731236	5.95833e-05	0.000905062	Rad54b	4	11558922	11615805	+	5782	protein_coding	RAD54 homolog B (S. cerevisiae) [Source:MGI Symbol;Acc:MGI:3605986]	-	57	62	60	65	109	115	99	3.26461	3.00157	3.2675	3.03834	5.01374	5.80277	4.69664
ENSMUSG00000114409	1.15255	2.76887	3.96256	4.48545	6.69351	20.9795	15.1808	-0.731171	0.00334033	0.0243544	Gm9042	19	36404447	36406110	+	1664	processed_pseudogene	predicted gene 9042 [Source:MGI Symbol;Acc:MGI:3647150]	-	1	3	4	5	7	20	15	0.0408558	0.103604	0.15539	0.166721	0.229684	0.719888	0.507622
ENSMUSG00000018362	2892.89	3025.45	2019.92	2681.4	4731.36	4487.51	4404.44	-0.730614	1.63331e-09	7.16152e-08	Kpna2	11	106988629	106999541	-	2873	protein_coding	karyopherin (importin) alpha 2 [Source:MGI Symbol;Acc:MGI:103561]	-	2510	3278	2039	2989	4948	4278	4352	172.364	190.275	133.137	167.519	272.886	258.818	247.546
ENSMUSG00000110554	20.7458	18.4591	4.95321	12.5593	35.38	30.4202	36.4338	-0.730329	0.0048251	0.0322886	Gm35256	8	71026792	71126576	+	3269	lincRNA	predicted gene, 35256 [Source:MGI Symbol;Acc:MGI:5594415]	-	18	20	5	14	37	29	36	0.374339	0.351579	0.0988713	0.237622	0.617978	0.531339	0.62014
ENSMUSG00000041578	13109.1	12677.7	10293.8	11889.1	20348.3	20420.4	19896.9	-0.730184	1.34593e-15	1.69548e-13	Crx	7	15865947	15879968	-	3160	protein_coding	cone-rod homeobox [Source:MGI Symbol;Acc:MGI:1194883]	TF_Otx	11374	13736	10391	13253	21280	19467	19660	415.28	423.924	360.739	394.919	623.991	626.193	594.574
ENSMUSG00000005628	3.45764	5.53773	8.91577	3.58836	14.3432	16.7836	20.241	-0.728953	0.00507234	0.0335691	Tmod4	3	95124476	95129209	+	1717	protein_coding	tropomodulin 4 [Source:MGI Symbol;Acc:MGI:1355285]	-	3	6	9	4	15	16	20	0.234698	0.39677	0.669481	0.255396	0.942449	1.10278	1.29602
ENSMUSG00000103445	4.61019	10.1525	3.96256	1.79418	12.4308	19.9305	22.2651	-0.728767	0.00459417	0.0311013	Gm36948	9	72440760	72444006	+	3247	TEC	predicted gene, 36948 [Source:MGI Symbol;Acc:MGI:5610176]	-	4	11	4	2	13	19	22	0.0837501	0.194679	0.079633	0.034176	0.218599	0.350477	0.381542
ENSMUSG00000035578	179.797	157.825	156.521	137.255	250.529	294.761	272.242	-0.728458	2.47264e-07	7.17473e-06	Iqcg	16	33012683	33056218	-	6164	protein_coding	IQ motif containing G [Source:MGI Symbol;Acc:MGI:1916957]	-	156	171	158	153	262	281	269	6.01902	5.57697	5.79651	4.81791	8.11861	9.55188	8.59704
ENSMUSG00000085968	189.018	372.874	244.688	266.436	512.532	501.409	417.977	-0.726883	2.40002e-05	0.000419503	Gm13027	4	140131877	140133351	+	241	antisense	predicted gene 13027 [Source:MGI Symbol;Acc:MGI:3651912]	-	164	404	247	297	536	478	413	46.263	96.3324	66.2514	68.3774	121.432	118.795	96.5018
ENSMUSG00000086690	26.5086	34.1494	31.7005	17.9418	66.9351	57.6935	42.5061	-0.725871	0.00219566	0.0176102	4933406J10Rik	7	82743368	82755644	-	963	antisense	RIKEN cDNA 4933406J10 gene [Source:MGI Symbol;Acc:MGI:1921308]	-	23	37	32	20	70	55	42	1.62371	2.20792	2.14802	1.15233	3.96879	3.42078	2.45598
ENSMUSG00000094092	10.3729	6.46069	13.869	7.17672	19.1243	17.8325	39.47	-0.725399	0.0056124	0.0362903	Gm15921	5	130208080	130208562	-	483	processed_pseudogene	predicted gene 15921 [Source:MGI Symbol;Acc:MGI:3801933]	-	9	7	14	8	20	17	39	1.26678	0.832835	1.87368	0.919002	2.26084	2.1081	4.54695
ENSMUSG00000020718	494.443	588.846	423.994	471.87	994.464	834.983	721.592	-0.725278	8.14787e-08	2.66969e-06	Polg2	11	106768253	106779537	-	4356	protein_coding	polymerase (DNA directed), gamma 2, accessory subunit [Source:MGI Symbol;Acc:MGI:1354947]	-	429	638	428	526	1040	796	713	18.9016	23.7609	17.9305	18.9144	36.8005	30.8984	26.0211
ENSMUSG00000094772	13.8306	27.6887	35.6631	26.9127	49.7232	54.5466	55.6628	-0.724713	0.0023787	0.0187108	Rpl29-ps2	13	4609334	4615025	+	1323	transcribed_processed_pseudogene	ribosomal protein L29, pseudogene 2 [Source:MGI Symbol;Acc:MGI:3648624]	-	12	30	36	30	52	52	55	0.91356	1.93054	2.60595	1.86399	3.17935	3.48771	3.46828
ENSMUSG00000039065	654.647	573.155	601.319	577.726	882.587	1099.32	1069.74	-0.724494	1.92356e-11	1.19122e-09	Fam173b	15	31601852	31621227	+	5248	protein_coding	family with sequence similarity 173, member B [Source:MGI Symbol;Acc:MGI:1915323]	-	568	621	607	644	923	1048	1057	14.1602	13.0862	14.3886	13.1031	18.48	23.0178	21.8269
ENSMUSG00000087617	435.663	472.553	424.985	370.498	774.535	787.779	615.327	-0.723782	5.46775e-09	2.17996e-07	Gm14268	2	166380828	166398187	-	968	lincRNA	predicted gene 14268 [Source:MGI Symbol;Acc:MGI:3649848]	-	378	512	429	413	810	751	608	34.5403	39.5462	37.2735	30.8	59.4427	60.4582	46.0186
ENSMUSG00000020890	11282.3	10123	8809.77	10898.8	15878	17059.4	19016.4	-0.723279	1.06245e-12	8.36086e-11	Gucy2e	11	69218117	69237036	-	9197	protein_coding	guanylate cyclase 2e [Source:MGI Symbol;Acc:MGI:105123]	-	9789	10968	8893	12149	16605	16263	18790	135.816	128.629	117.319	137.568	185.024	198.789	215.94
ENSMUSG00000100632	12.678	22.1509	19.8128	8.07381	31.5551	38.812	36.4338	-0.722014	0.00470149	0.0317087	9430060I03Rik	1	92933526	92950590	-	1689	antisense	RIKEN cDNA 9430060I03 gene [Source:MGI Symbol;Acc:MGI:3702484]	-	11	24	20	9	33	37	36	0.442762	0.816563	0.765448	0.295656	1.06677	1.31208	1.20026
ENSMUSG00000071647	2581.71	3180.5	2553.87	2521.72	4926.42	4504.29	4233.41	-0.719423	2.19655e-12	1.6632e-10	Eml3	19	8929552	8941582	+	4108	protein_coding	echinoderm microtubule associated protein like 3 [Source:MGI Symbol;Acc:MGI:2387612]	-	2240	3446	2578	2811	5152	4294	4183	108.157	140.644	118.357	110.772	199.783	182.662	167.297
ENSMUSG00000105377	14.9831	11.0755	4.95321	7.17672	26.774	19.9305	26.3133	-0.719164	0.00596588	0.0379898	Gm43148	5	96936813	96937332	+	520	TEC	predicted gene 43148 [Source:MGI Symbol;Acc:MGI:5663285]	-	13	12	5	8	28	19	26	1.6996	1.32613	0.621558	0.853611	2.93996	2.18846	2.81561
ENSMUSG00000025380	2127.6	2476.29	2071.43	2045.37	3940.57	3544.48	3456.15	-0.71718	3.56887e-14	3.67513e-12	Fscn2	11	120361534	120368168	+	2110	protein_coding	fascin actin-bundling protein 2 [Source:MGI Symbol;Acc:MGI:2443337]	-	1846	2683	2091	2280	4121	3379	3415	126.638	155.58	136.394	127.654	227.047	204.222	194.053
ENSMUSG00000062510	17.2882	27.6887	39.6256	27.8098	47.8108	66.0853	55.6628	-0.716137	0.0024443	0.0191516	Nsl1	1	191063012	191086474	+	5303	protein_coding	NSL1, MIS12 kinetochore complex component [Source:MGI Symbol;Acc:MGI:2685830]	-	15	30	40	31	50	63	55	0.483758	0.817822	1.2266	0.815952	1.29505	1.79002	1.46925
ENSMUSG00000089708	3.45764	2.76887	6.93449	7.17672	20.0805	11.5387	18.2169	-0.71525	0.00573379	0.0369163	5330439A09Rik	8	54568550	54600987	-	1117	antisense	RIKEN cDNA 5330439A09 gene [Source:MGI Symbol;Acc:MGI:1924353]	-	3	3	7	8	21	11	18	0.182589	0.154339	0.405098	0.397384	1.02648	0.589832	0.907448
ENSMUSG00000106229	28.8137	13.8443	32.6912	31.3982	30.5989	63.9874	80.964	-0.714732	0.00473319	0.0318867	Gm19409	5	30815620	30818477	+	2858	sense_intronic	predicted gene, 19409 [Source:MGI Symbol;Acc:MGI:5011594]	-	25	15	33	35	32	61	80	0.594683	0.301604	0.746392	0.679484	0.611328	1.27837	1.57627
ENSMUSG00000052562	25.356	43.3789	26.7473	18.8389	48.767	50.3507	76.9158	-0.714559	0.00321131	0.0237371	Slc22a30	19	8335371	8405111	-	3368	protein_coding	solute carrier family 22, member 30 [Source:MGI Symbol;Acc:MGI:2442750]	-	22	47	27	21	51	48	76	0.665621	1.202	0.776741	0.518549	1.23923	1.27946	1.90464
ENSMUSG00000020930	34.5764	33.2264	24.766	29.604	58.3292	58.7425	56.6748	-0.714501	0.00116101	0.0107792	Ccdc103	11	102881204	102885216	+	1890	protein_coding	coiled-coil domain containing 103 [Source:MGI Symbol;Acc:MGI:1920543]	-	30	36	25	33	61	56	56	1.3615	1.38102	1.07881	1.22229	2.22333	2.23906	2.10513
ENSMUSG00000019978	14999.2	15247.2	12759.5	14180.3	23671.1	24491.4	23115.2	-0.714485	2.65249e-18	4.42597e-16	Epb41l2	10	25359798	25523519	+	11843	protein_coding	erythrocyte membrane protein band 4.1 like 2 [Source:MGI Symbol;Acc:MGI:103009]	-	13014	16520	12880	15807	24755	23348	22840	463.217	497.032	435.911	459.187	707.646	732.158	673.388
ENSMUSG00000042510	85.2885	97.8333	79.2513	116.622	158.732	156.297	185.205	-0.712321	3.262e-05	0.000544155	AA986860	1	130731976	130744622	+	3640	protein_coding	expressed sequence AA986860 [Source:MGI Symbol;Acc:MGI:2138143]	-	74	106	80	130	166	149	183	2.30666	2.79292	2.3711	3.30721	4.15565	4.09184	4.72496
ENSMUSG00000079033	9.22038	11.9984	20.8035	4.48545	30.5989	22.0284	37.4459	-0.711042	0.00660188	0.0409262	Mef2b	8	70139711	70167488	+	1404	protein_coding	myocyte enhancer factor 2B [Source:MGI Symbol;Acc:MGI:104526]	SRF	8	13	21	5	32	21	37	0.420629	0.577767	1.04987	0.214558	1.35126	0.972768	1.61141
ENSMUSG00000041528	3580.96	3419.55	3116.56	3673.59	5181.73	5845.93	6173.51	-0.710589	9.34453e-15	1.0467e-12	Rnf123	9	108051534	108083346	-	6754	protein_coding	ring finger protein 123 [Source:MGI Symbol;Acc:MGI:2148796]	-	3107	3705	3146	4095	5419	5573	6100	103.695	104.521	99.835	111.541	145.249	163.865	168.632
ENSMUSG00000056752	396.476	352.569	283.323	387.543	425.516	686.028	746.893	-0.710533	2.21845e-05	0.000391564	Dnah9	11	65831282	66168551	-	15949	protein_coding	dynein, axonemal, heavy chain 9 [Source:MGI Symbol;Acc:MGI:1289279]	-	344	382	286	432	445	654	738	5.46798	5.13254	4.32257	5.60426	5.68077	9.15856	9.71672
ENSMUSG00000037112	779.122	617.457	554.759	651.288	950.479	1137.09	1210.41	-0.710465	2.04106e-08	7.3417e-07	Sik2	9	50892801	51009073	-	9539	protein_coding	salt inducible kinase 2 [Source:MGI Symbol;Acc:MGI:2445031]	-	676	669	560	726	994	1084	1196	16.0521	13.428	12.6439	14.0698	18.9562	22.6776	23.5241
ENSMUSG00000013155	205.153	301.806	253.604	225.17	462.808	438.471	365.35	-0.70904	1.22252e-06	3.0514e-05	Enkd1	8	105703651	105708210	-	3659	protein_coding	enkurin domain containing 1 [Source:MGI Symbol;Acc:MGI:2142593]	-	178	327	256	251	484	418	361	6.1521	9.55325	8.413	7.08016	13.4347	12.728	10.3349
ENSMUSG00000002058	17510.6	21457.8	17452.1	17813.5	35309.2	29896.8	27813.2	-0.709028	1.97634e-11	1.20961e-09	Unc119	11	78343482	78349164	+	2448	protein_coding	unc-119 lipid binding chaperone [Source:MGI Symbol;Acc:MGI:1328357]	-	15193	23249	17617	19857	36926	28501	27482	985.575	1274.83	1086.64	1051.3	1923.79	1628.87	1476.69
ENSMUSG00000038241	3624.76	3547.84	2916.45	3530.05	5044.04	5884.74	6092.54	-0.707726	3.8341e-12	2.70958e-10	Cep250	2	155956458	155998900	+	10373	protein_coding	centrosomal protein 250 [Source:MGI Symbol;Acc:MGI:108084]	-	3145	3844	2944	3935	5275	5610	6020	52.6366	54.3815	46.8504	53.75	70.9037	82.7202	83.4563
ENSMUSG00000110824	247.798	175.362	201.1	173.138	321.289	353.504	342.073	-0.707347	8.56931e-07	2.19021e-05	Gm48677	9	75317072	75342842	-	614	antisense	predicted gene, 48677 [Source:MGI Symbol;Acc:MGI:6098297]	-	215	190	203	193	336	337	338	23.8055	17.7825	21.3719	17.4406	29.8784	32.8738	30.9992
ENSMUSG00000054057	343.459	433.789	380.406	422.53	768.798	625.188	605.206	-0.707135	1.65914e-08	6.05249e-07	A930004D18Rik	2	18025193	18037737	-	3378	protein_coding	RIKEN cDNA A930004D18 gene [Source:MGI Symbol;Acc:MGI:1925190]	-	298	470	384	471	804	596	598	15.1755	20.2313	18.5937	19.5755	32.8822	26.7395	25.2245
ENSMUSG00000084381	32.2713	53.5314	38.635	38.5749	67.8913	89.1627	71.8556	-0.706867	0.000978699	0.00935161	AA413626	11	4918510	4919003	+	494	processed_pseudogene	expressed sequence AA413626 [Source:MGI Symbol;Acc:MGI:3035311]	-	28	58	39	43	71	85	71	3.85335	6.74697	5.10332	4.82964	7.84725	10.3058	8.09345
ENSMUSG00000026683	12.678	12.9214	6.93449	14.3534	38.2486	35.6651	14.1687	-0.706499	0.00686712	0.0420783	Nuf2	1	169497934	169531464	-	6341	protein_coding	NUF2, NDC80 kinetochore complex component [Source:MGI Symbol;Acc:MGI:1914227]	-	11	14	7	16	40	34	14	0.368568	0.39651	0.223014	0.437534	1.07638	1.00366	0.388551
ENSMUSG00000021396	885.156	1345.67	950.025	993.976	2227.03	1760.18	1393.59	-0.705753	4.97928e-06	0.000105816	Nxnl2	13	51171022	51175188	+	3505	protein_coding	nucleoredoxin-like 2 [Source:MGI Symbol;Acc:MGI:1922374]	-	768	1458	959	1108	2329	1678	1377	25.6569	41.1719	30.4628	30.2099	62.4873	49.3874	38.1041
ENSMUSG00000017344	9001.39	8547.49	7143.51	8627.32	14287.8	13436.3	13672.8	-0.705705	7.56835e-15	8.63223e-13	Vtn	11	78499091	78502324	+	2030	protein_coding	vitronectin [Source:MGI Symbol;Acc:MGI:98940]	-	7810	9261	7211	9617	14942	12809	13510	472.381	473.478	414.71	474.73	725.82	682.555	676.848
ENSMUSG00000086430	32.2713	15.6902	18.8222	9.868	35.38	36.7141	54.6507	-0.705662	0.00578722	0.0372071	4930551O13Rik	2	5037280	5041133	+	1065	antisense	RIKEN cDNA 4930551O13 gene [Source:MGI Symbol;Acc:MGI:1922513]	-	28	17	19	11	37	35	54	1.78738	0.917291	1.15324	0.573082	1.89687	1.96837	2.85527
ENSMUSG00000002459	757.223	859.272	671.655	672.818	1255.51	1276.6	1171.95	-0.705454	6.01395e-11	3.31429e-09	Rgs20	1	4909576	5070285	-	4239	protein_coding	regulator of G-protein signaling 20 [Source:MGI Symbol;Acc:MGI:1929866]	-	657	931	678	750	1313	1217	1158	37.8201	45.301	37.1104	35.2359	60.7017	61.7205	55.2155
ENSMUSG00000026650	16.1357	30.4575	26.7473	34.0894	65.9789	43.0079	52.6266	-0.704453	0.00312755	0.0232899	Meig1	2	3409043	3422648	-	1102	protein_coding	meiosis expressed gene 1 [Source:MGI Symbol;Acc:MGI:1202878]	-	14	33	27	38	69	41	52	1.62697	3.24165	2.98348	3.60414	6.43991	4.19775	5.00553
ENSMUSG00000020183	174.035	185.514	108.971	141.74	247.66	250.705	297.543	-0.704252	3.30462e-05	0.000550394	Cpm	10	117629500	117687352	+	5964	protein_coding	carboxypeptidase M [Source:MGI Symbol;Acc:MGI:1917824]	-	151	201	110	158	259	239	294	4.79029	5.38991	3.31807	4.0908	6.59878	6.67981	7.72552
ENSMUSG00000021620	11.5255	7.38364	12.8783	4.48545	24.8616	31.4692	15.1808	-0.701753	0.00738128	0.0444002	Acot12	13	91741512	91786148	+	3293	protein_coding	acyl-CoA thioesterase 12 [Source:MGI Symbol;Acc:MGI:1921406]	-	10	8	13	5	26	30	15	0.458114	0.309788	0.566272	0.186943	0.95659	1.21081	0.569193
ENSMUSG00000041609	5824.97	5853.38	4564.87	5601.43	8808.66	9153.34	9132.74	-0.700362	3.65916e-13	3.1252e-11	Bicdl1	5	115648175	115731621	-	6157	protein_coding	BICD family like cargo adaptor 1 [Source:MGI Symbol;Acc:MGI:1922915]	-	5054	6342	4608	6244	9212	8726	9024	244.549	259.393	212.008	246.581	357.984	371.987	361.681
ENSMUSG00000048292	35.729	14.7673	32.6912	36.7807	55.4605	68.1832	54.6507	-0.699686	0.00339076	0.0246291	Olfr1417	19	11826803	11839219	-	3582	protein_coding	olfactory receptor 1417 [Source:MGI Symbol;Acc:MGI:3031251]	-	31	16	33	41	58	65	54	0.934179	0.407557	0.945562	1.00837	1.4037	1.72569	1.3479
ENSMUSG00000080893	5.76273	6.46069	6.93449	4.48545	19.1243	15.7346	15.1808	-0.699468	0.0074587	0.044635	Gm15920	5	130188395	130188796	+	402	processed_pseudogene	predicted gene 15920 [Source:MGI Symbol;Acc:MGI:3801934]	-	5	7	7	5	20	15	15	0.845574	1.00064	1.12561	0.690109	2.71638	2.23488	2.1012
ENSMUSG00000030189	6288.3	6657.28	5159.26	6133.41	9925.52	10316.6	9747.06	-0.69822	1.01644e-13	9.59015e-12	Ybx3	6	131364855	131388476	-	3075	protein_coding	Y box protein 3 [Source:MGI Symbol;Acc:MGI:2137670]	CSD	5456	7213	5208	6837	10380	9835	9631	301.317	336.718	273.482	308.163	460.39	478.525	440.571
ENSMUSG00000078588	429.9	549.158	395.266	426.118	769.754	814.003	678.074	-0.696453	4.51372e-08	1.53186e-06	Ccdc24	4	117866524	117872557	-	4491	protein_coding	coiled-coil domain containing 24 [Source:MGI Symbol;Acc:MGI:2685874]	-	373	595	399	475	805	776	670	21.2024	28.5887	21.5654	22.0362	36.7495	38.8615	31.5461
ENSMUSG00000025161	578.579	685.756	603.3	569.652	973.428	1125.55	932.098	-0.695948	1.51428e-10	7.93281e-09	Slc16a3	11	120948480	120960868	+	5318	protein_coding	solute carrier family 16 (monocarboxylic acid transporters), member 3 [Source:MGI Symbol;Acc:MGI:1933438]	-	502	743	609	635	1018	1073	921	22.0893	27.6356	25.4803	22.8044	35.9754	41.5968	33.5686
ENSMUSG00000027496	11.5255	21.228	13.869	19.736	30.5989	31.4692	44.5302	-0.695332	0.00572011	0.0368545	Aurka	2	172356190	172370535	-	2531	protein_coding	aurora kinase A [Source:MGI Symbol;Acc:MGI:894678]	-	10	23	14	22	32	30	44	0.489799	0.95224	0.652009	0.879441	1.25877	1.29455	1.78511
ENSMUSG00000052549	19.5933	10.1525	9.90641	16.1476	27.7303	38.812	26.3133	-0.694892	0.00677311	0.0416455	Arl13a	X	134187501	134208028	+	1740	protein_coding	ADP-ribosylation factor-like 13A [Source:MGI Symbol;Acc:MGI:1921698]	-	17	11	10	18	29	37	26	0.664213	0.363288	0.371506	0.57398	0.909987	1.27362	0.841446
ENSMUSG00000029910	278.916	296.269	293.23	251.185	450.378	462.597	479.712	-0.69427	9.64066e-10	4.40866e-08	Mad2l1	6	66535390	66547220	+	8390	protein_coding	MAD2 mitotic arrest deficient-like 1 [Source:MGI Symbol;Acc:MGI:1860374]	-	242	321	296	280	471	441	474	5.88207	6.59509	6.84092	5.55442	9.19422	9.44354	9.54307
ENSMUSG00000030878	2740.76	3254.34	2194.27	2834.81	5129.14	4595.55	4068.44	-0.694241	2.22433e-08	7.96912e-07	Cdr2	7	120957036	120982312	-	5684	protein_coding	cerebellar degeneration-related 2 [Source:MGI Symbol;Acc:MGI:1100885]	-	2378	3526	2215	3160	5364	4381	4020	71.1872	89.2222	63.0481	77.2046	128.961	115.543	99.6807
ENSMUSG00000070583	94.5088	122.753	107.98	105.857	164.469	206.648	183.181	-0.693863	1.31869e-05	0.000245245	Fv1	4	147868979	147870358	+	1380	protein_coding	Friend virus susceptibility 1 [Source:MGI Symbol;Acc:MGI:95595]	-	82	133	109	118	172	197	181	4.03964	5.53835	5.10579	4.74435	6.80512	8.55019	7.38587
ENSMUSG00000086368	73.763	79.3742	51.5133	105.857	97.534	165.738	166.988	-0.693848	0.00122926	0.0112735	Gm13830	5	115301120	115319208	+	3099	lincRNA	predicted gene 13830 [Source:MGI Symbol;Acc:MGI:3651141]	-	64	86	52	118	102	158	165	5.37158	6.10129	4.14986	8.08296	6.87546	11.6832	11.471
ENSMUSG00000051844	28.8137	20.305	34.6724	32.2953	67.8913	60.8404	40.482	-0.692956	0.00320534	0.0237124	B230319C09Rik	6	83441755	83448322	+	2217	processed_transcript	RIKEN cDNA B230319C09 gene [Source:MGI Symbol;Acc:MGI:2444713]	-	25	22	35	36	71	58	40	1.72724	1.2848	2.29926	2.02993	3.93958	3.53038	2.28911
ENSMUSG00000033276	215.526	239.045	272.426	273.613	371.012	468.891	418.989	-0.691795	2.04808e-07	6.09051e-06	Stk36	1	74601445	74636894	+	6437	protein_coding	serine/threonine kinase 36 [Source:MGI Symbol;Acc:MGI:1920831]	-	187	259	275	305	388	447	414	4.4066	5.15896	6.16172	5.8658	7.34298	9.28005	8.08085
ENSMUSG00000105861	12.678	12.9214	6.93449	4.48545	29.6427	24.1264	17.2049	-0.691207	0.00831329	0.0481718	Gm43508	5	44623919	44627701	-	3783	TEC	predicted gene 43508 [Source:MGI Symbol;Acc:MGI:5663645]	-	11	14	7	5	31	23	17	0.19768	0.212667	0.119613	0.0733343	0.447416	0.36415	0.253055
ENSMUSG00000075410	1874.04	3086.36	2197.24	2253.49	4917.82	3851.83	3215.28	-0.69119	6.85943e-06	0.000139205	Prcd	11	116653534	116668389	+	1534	protein_coding	photoreceptor disc component [Source:MGI Symbol;Acc:MGI:3649529]	-	1626	3344	2218	2512	5143	3672	3177	126.623	220.12	164.234	159.654	321.654	251.928	204.93
ENSMUSG00000025860	8704.03	8006.64	6322.27	7866.59	11361.8	13156.2	13790.2	-0.6906	6.23445e-10	2.9644e-08	Xiap	X	42059679	42109656	+	9469	protein_coding	X-linked inhibitor of apoptosis [Source:MGI Symbol;Acc:MGI:107572]	-	7552	8675	6382	8769	11882	12542	13626	156.054	151.524	125.394	147.886	197.188	228.328	233.225
ENSMUSG00000109958	5.76273	7.38364	10.8971	10.7651	20.0805	24.1264	20.241	-0.688047	0.00847786	0.0489071	Gm32786	7	142095758	142125189	+	628	bidirectional_promoter_lncRNA	predicted gene, 32786 [Source:MGI Symbol;Acc:MGI:5591945]	-	5	8	11	12	21	23	20	0.541275	0.732046	1.13227	1.06022	1.82577	2.1936	1.79338
ENSMUSG00000024295	64.5426	59.0691	54.4853	48.4429	137.695	126.926	55.6628	-0.687315	0.00251834	0.019587	Cyp4f41-ps	17	32951744	32958695	-	1077	unprocessed_pseudogene	cytochrome P450, family 4, subfamily f, polypeptide 41 pseudogene [Source:MGI Symbol;Acc:MGI:1925125]	-	56	64	55	54	144	121	55	3.53492	3.41485	3.30113	2.78196	7.30017	6.72912	2.87574
ENSMUSG00000117303	81.8308	131.983	103.027	87.0178	181.681	196.158	149.783	-0.687291	0.000143674	0.00191222	CT025652.2	17	28326953	28328521	-	1569	bidirectional_promoter_lncRNA	novel transcript	-	71	143	104	97	190	187	148	3.0764	5.23746	4.28475	3.43022	6.61176	7.1385	5.31179
ENSMUSG00000048922	8.06783	15.6902	15.8503	3.58836	26.774	27.2733	27.3254	-0.686589	0.00872373	0.049908	Cdca2	14	67676331	67715841	-	5715	protein_coding	cell division cycle associated 2 [Source:MGI Symbol;Acc:MGI:1919787]	-	7	17	16	4	28	26	27	0.232822	0.477943	0.506005	0.108581	0.747934	0.76187	0.74385
ENSMUSG00000043418	2412.28	2489.21	2338.9	2300.14	4046.71	3871.76	3708.15	-0.686263	1.51051e-20	3.36061e-18	Lrit2	14	37067929	37073743	+	2909	protein_coding	leucine-rich repeat, immunoglobulin-like and transmembrane domains 2 [Source:MGI Symbol;Acc:MGI:2444885]	-	2093	2697	2361	2564	4232	3691	3664	80.3903	87.562	86.226	80.3745	130.545	124.899	116.569
ENSMUSG00000078851	328.476	495.627	417.06	381.263	813.74	681.832	556.628	-0.685034	5.092e-06	0.000107858	Hist3h2a	11	58954685	58956830	+	2146	protein_coding	histone cluster 3, H2a [Source:MGI Symbol;Acc:MGI:2448458]	-	285	537	421	425	851	650	550	9.02864	14.3798	12.6814	10.9884	21.6514	18.1415	14.4323
ENSMUSG00000074136	26.5086	19.3821	15.8503	24.2214	36.3362	45.1058	45.5423	-0.684612	0.00444627	0.0302706	4930513N10Rik	8	95806744	95821728	+	4342	antisense	RIKEN cDNA 4930513N10 gene [Source:MGI Symbol;Acc:MGI:2443064]	-	23	21	16	27	38	43	45	0.597035	0.460778	0.394912	0.572008	0.792199	0.98338	0.967563
ENSMUSG00000022580	639.664	838.966	738.028	640.523	1226.82	1179.05	1123.38	-0.684443	1.08289e-09	4.8665e-08	Rhpn1	15	75704280	75715485	+	4302	protein_coding	rhophilin, Rho GTPase binding protein 1 [Source:MGI Symbol;Acc:MGI:1098783]	-	555	909	745	714	1283	1124	1110	20.846	28.8598	26.6068	21.8873	38.7021	37.1943	34.534
ENSMUSG00000051169	47.2544	34.1494	28.7286	43.0603	81.2783	73.4281	56.6748	-0.682685	0.00191356	0.0158111	Rpusd3	6	113415319	113419340	-	2159	protein_coding	RNA pseudouridylate synthase domain containing 3 [Source:MGI Symbol;Acc:MGI:2141440]	-	41	37	29	48	85	70	56	3.65314	2.78667	2.45691	3.49052	6.08248	5.49493	4.133
ENSMUSG00000085151	159.051	225.201	151.568	184.801	332.763	366.092	229.735	-0.681544	8.32345e-05	0.00119902	1110018N20Rik	2	167188702	167192808	+	1579	processed_transcript	RIKEN cDNA 1110018N20 gene [Source:MGI Symbol;Acc:MGI:1915753]	-	138	244	153	206	348	349	227	9.51502	14.2207	10.0307	11.5921	19.2703	21.2001	12.9644
ENSMUSG00000072809	20.7458	32.3034	29.7192	32.2953	73.6286	48.2528	44.5302	-0.681259	0.003698	0.0263009	9330160F10Rik	11	69057718	69060483	-	2766	antisense	RIKEN cDNA 9330160F10 gene [Source:MGI Symbol;Acc:MGI:3693095]	-	18	35	30	36	77	46	44	0.442413	0.72715	0.701107	0.722144	1.51993	0.99608	0.895783
ENSMUSG00000033416	1139.87	1305.98	1034.23	1056.77	2031.96	1957.38	1600.05	-0.680434	2.34685e-09	9.99824e-08	Gucd1	10	75351111	75517972	-	8206	protein_coding	guanylyl cyclase domain containing 1 [Source:MGI Symbol;Acc:MGI:1916028]	-	989	1415	1044	1178	2125	1866	1581	45.277	54.7568	45.4453	44.0141	78.1302	75.2617	59.9526
ENSMUSG00000086013	344.612	760.515	518.105	412.662	1024.11	905.264	729.688	-0.680367	0.000269026	0.00322778	Gm15706	6	145250529	145251849	+	899	lincRNA	predicted gene 15706 [Source:MGI Symbol;Acc:MGI:3783146]	-	299	824	523	460	1071	863	721	22.611	52.6715	37.606	28.3904	65.0453	57.4963	45.1625
ENSMUSG00000033066	2563.26	2679.34	2094.22	2264.26	3993.16	4208.48	3571.53	-0.680296	5.93253e-11	3.27945e-09	Gas7	11	67455437	67688990	+	11342	protein_coding	growth arrest specific 7 [Source:MGI Symbol;Acc:MGI:1202388]	-	2224	2903	2114	2524	4176	4012	3529	79.8715	88.1261	72.1888	73.9796	120.447	126.94	104.979
ENSMUSG00000095789	44.9493	56.3003	54.4853	49.34	113.79	98.6035	64.7712	-0.67965	0.00116596	0.0108141	Nupr1l	5	129908540	129913789	+	2489	protein_coding	nuclear protein transcriptional regulator 1 like [Source:MGI Symbol;Acc:MGI:1923099]	-	39	61	55	55	119	94	64	2.94926	3.89922	3.95474	3.39451	7.22726	6.26263	4.00888
ENSMUSG00000078963	221.289	274.118	264.501	252.98	444.64	446.863	365.35	-0.67778	1.33354e-07	4.17218e-06	Hsbp1l1	18	80229758	80247102	-	1251	protein_coding	heat shock factor binding protein 1-like 1 [Source:MGI Symbol;Acc:MGI:1913505]	-	192	297	267	282	465	426	361	10.434	13.6429	13.7965	12.5073	20.2947	20.3958	16.25
ENSMUSG00000022701	270.849	314.728	296.202	314.879	455.159	529.731	489.832	-0.677444	3.96694e-09	1.62105e-07	Ccdc191	16	43889800	43964314	+	4230	protein_coding	coiled-coil domain containing 191 [Source:MGI Symbol;Acc:MGI:1922661]	-	235	341	299	351	476	505	484	7.76301	9.52175	9.39163	9.46314	12.6284	14.6972	13.2435
ENSMUSG00000089842	696.138	1209.07	1044.14	764.321	1794.82	1843.05	1131.47	-0.67694	0.000107293	0.00149307	Pitpnm2os2	5	124194907	124200346	+	3821	antisense	phosphatidylinositol transfer protein, membrane-associated 2, opposite strand 2 [Source:MGI Symbol;Acc:MGI:3840147]	-	604	1310	1054	852	1877	1757	1118	30.507	55.9286	50.6187	35.1211	76.1387	78.1835	46.7734
ENSMUSG00000109482	4.61019	0.922955	2.97192	1.79418	7.64973	10.4897	17.2049	-0.676837	0.00548767	0.0356048	Gm4756	12	72576002	72649661	-	3391	protein_coding	predicted gene 4756 [Source:MGI Symbol;Acc:MGI:3644906]	-	4	1	3	2	8	10	17	0.209182	0.0442043	0.149174	0.0853611	0.335995	0.460729	0.73639
ENSMUSG00000020493	93.3563	58.1462	56.4665	66.3847	108.052	146.856	107.277	-0.676349	0.000718599	0.00732873	Prr11	11	87089153	87108708	-	3824	protein_coding	proline rich 11 [Source:MGI Symbol;Acc:MGI:2444496]	-	81	63	57	74	113	140	106	1.44004	0.94674	0.963546	1.07371	1.61342	2.1928	1.56095
ENSMUSG00000046814	8.06783	30.4575	17.8315	24.2214	55.4605	36.7141	38.4579	-0.673948	0.00830112	0.048163	Gchfr	2	119167773	119172390	+	645	protein_coding	GTP cyclohydrolase I feedback regulator [Source:MGI Symbol;Acc:MGI:2443977]	-	7	33	18	27	58	35	38	0.737812	2.9401	1.80397	2.32262	4.9097	3.2501	3.31762
ENSMUSG00000111685	134.848	131.983	135.718	157.888	238.098	271.684	195.326	-0.673423	1.23565e-05	0.00023244	Gm10686	9	44255047	44258293	+	3247	TEC	predicted gene 10686 [Source:MGI Symbol;Acc:MGI:3704331]	-	117	143	137	176	249	259	193	2.44969	2.53082	2.72743	3.00749	4.187	4.77756	3.34717
ENSMUSG00000107742	149.831	264.888	230.819	200.948	330.851	475.185	289.446	-0.672951	0.000233635	0.00287681	9530085L11Rik	8	13285352	13287466	-	2115	TEC	RIKEN cDNA 9530085L11 gene [Source:MGI Symbol;Acc:MGI:2443889]	-	130	287	233	224	346	453	286	4.17869	7.79793	7.12133	5.8764	8.93207	12.8285	7.61479
ENSMUSG00000070730	869.02	955.259	871.764	1010.12	1399.9	1631.15	1478.61	-0.672171	4.23835e-12	2.92641e-10	Rmdn3	2	119137001	119157034	-	3537	protein_coding	regulator of microtubule dynamics 3 [Source:MGI Symbol;Acc:MGI:1915059]	-	754	1035	880	1126	1464	1555	1461	66.8318	77.5448	74.1656	81.4548	104.215	121.429	107.265
ENSMUSG00000050556	35367.1	28446.4	20762.8	29137.5	42025.7	46797.8	52243.1	-0.671225	1.26645e-06	3.14795e-05	Kcnb1	2	167095969	167190155	-	11488	protein_coding	potassium voltage gated channel, Shab-related subfamily, member 1 [Source:MGI Symbol;Acc:MGI:96666]	-	30686	30821	20959	32480	43950	44613	51621	459.001	389.691	298.093	396.511	527.973	587.917	639.58
ENSMUSG00000105124	40.3391	48.9166	44.5789	49.34	56.4167	96.5055	96.1448	-0.670668	0.00179409	0.0150157	Gm5297	5	72626858	72628028	-	1171	transcribed_processed_pseudogene	predicted gene 5297 [Source:MGI Symbol;Acc:MGI:3646414]	-	35	53	45	55	59	92	95	2.03198	2.60092	2.48411	2.60603	2.75094	4.70565	4.56845
ENSMUSG00000037977	436.815	570.386	456.686	485.326	871.113	755.261	762.074	-0.669914	9.98564e-09	3.80447e-07	6430571L13Rik	9	107340602	107352422	+	2912	protein_coding	RIKEN cDNA 6430571L13 gene [Source:MGI Symbol;Acc:MGI:2445137]	-	379	618	461	541	911	720	753	16.8076	23.1662	19.439	19.5807	32.4461	28.1306	27.6602
ENSMUSG00000021928	1203.26	1396.43	1149.14	1216.45	2100.81	1899.69	2019.04	-0.669843	7.01889e-13	5.69763e-11	Ebpl	14	61331742	61360439	-	14296	protein_coding	emopamil binding protein-like [Source:MGI Symbol;Acc:MGI:1915427]	-	1044	1513	1160	1356	2197	1811	1995	12.9564	15.8717	13.6884	13.7344	21.8975	19.8009	20.508
ENSMUSG00000027488	941.631	1053.09	878.699	993.976	1625.57	1575.56	1481.64	-0.668237	5.27945e-13	4.38438e-11	Snta1	2	154376313	154408099	-	3094	protein_coding	syntrophin, acidic 1 [Source:MGI Symbol;Acc:MGI:101772]	-	817	1141	887	1108	1700	1502	1464	29.264	34.546	30.2094	32.3905	48.9034	47.3982	43.4357
ENSMUSG00000054150	2356.96	1980.66	1679.14	2151.22	2751.99	3436.44	3864.01	-0.668125	2.41831e-07	7.02909e-06	Syne3	12	104929933	105009809	-	5548	protein_coding	spectrin repeat containing, nuclear envelope family member 3 [Source:MGI Symbol;Acc:MGI:2442408]	-	2045	2146	1695	2398	2878	3276	3818	30.4085	26.9731	23.9651	29.1016	34.3693	42.9167	47.0254
ENSMUSG00000029524	580.884	816.816	744.962	584.903	1120.68	1217.86	1022.17	-0.668106	2.88497e-07	8.21193e-06	Sirt4	5	115478010	115484725	-	2398	protein_coding	sirtuin 4 [Source:MGI Symbol;Acc:MGI:1922637]	-	504	885	752	652	1172	1161	1010	32.5703	48.3432	46.208	34.3879	60.8273	66.1005	54.064
ENSMUSG00000058966	11238.5	13439.2	10961.4	11369.7	20543.3	18919.3	17444.7	-0.667106	2.39556e-12	1.7913e-10	Fam57b	7	126797668	126830219	+	3935	protein_coding	family with sequence similarity 57, member B [Source:MGI Symbol;Acc:MGI:1916202]	-	9751	14561	11065	12674	21484	18036	17237	477.603	602.851	515.32	506.638	845.108	778.286	699.318
ENSMUSG00000082063	50.7121	60.9151	36.6537	49.34	104.228	94.4076	66.7953	-0.666124	0.00172373	0.0145632	Gm12993	4	116874588	116875465	-	479	processed_pseudogene	predicted gene 12993 [Source:MGI Symbol;Acc:MGI:3650477]	-	44	66	37	55	109	90	66	6.24489	7.91802	4.99323	6.3709	12.4245	11.2537	7.75909
ENSMUSG00000010492	977.36	1291.21	999.557	1051.39	1809.16	1781.16	1662.8	-0.665325	8.71525e-10	4.01682e-08	Uckl1os	2	181578480	181585170	+	2522	antisense	uridine-cytidine kinase 1-like 1, opposite strand [Source:MGI Symbol;Acc:MGI:3801877]	-	848	1399	1009	1172	1892	1698	1643	72.7911	101.508	82.3534	82.1062	130.431	128.411	116.819
ENSMUSG00000032087	3435.74	3316.18	2662.84	3018.71	4751.44	5328.78	4971.19	-0.664957	2.39279e-11	1.447e-09	Dscaml1	9	45426628	45753712	+	8909	protein_coding	DS cell adhesion molecule like 1 [Source:MGI Symbol;Acc:MGI:2150309]	-	2981	3593	2688	3365	4969	5080	4912	113.029	115.156	96.909	104.131	151.313	169.696	154.27
ENSMUSG00000050619	1200.95	1091.86	1008.47	1265.79	1708.76	1866.12	1957.31	-0.664614	5.47278e-11	3.06289e-09	Zscan29	2	121158273	121171125	-	7169	protein_coding	zinc finger SCAN domains 29 [Source:MGI Symbol;Acc:MGI:2139317]	zf-C2H2	1042	1183	1018	1411	1787	1779	1934	23.9403	22.9746	22.2391	26.4579	32.9736	36.0097	36.8056
ENSMUSG00000079499	1698.85	1824.68	1532.52	1878.51	2363.77	2816.49	3276.01	-0.66449	1.11353e-08	4.1806e-07	6530402F18Rik	2	29245107	29253006	-	5511	processed_transcript	RIKEN cDNA 6530402F18 gene [Source:MGI Symbol;Acc:MGI:1923470]	-	1474	1977	1547	2094	2472	2685	3237	38.6607	43.8308	38.5807	44.8245	52.0715	62.0437	70.3251
ENSMUSG00000030323	794.105	886.037	803.41	817.249	1306.19	1373.11	1297.45	-0.664254	8.9444e-15	1.01376e-12	Ift122	6	115853470	115926699	+	10319	protein_coding	intraflagellar transport 122 [Source:MGI Symbol;Acc:MGI:1932386]	-	689	960	811	911	1366	1309	1282	19.7392	23.2478	22.0922	21.3007	31.4296	33.0393	30.4223
ENSMUSG00000091050	24.2035	18.4591	20.8035	9.868	31.5551	44.0569	36.4338	-0.664018	0.00829086	0.0481345	9330020H09Rik	15	98567324	98569583	+	2147	antisense	RIKEN cDNA 9330020H09 gene [Source:MGI Symbol;Acc:MGI:3704457]	-	21	20	21	11	33	42	36	0.664959	0.535311	0.63227	0.284272	0.839205	1.17167	0.944219
ENSMUSG00000017561	915.122	1090.01	909.409	1075.61	1642.78	1665.77	1517.06	-0.662555	2.54591e-11	1.52603e-09	Crlf3	11	80046493	80080991	-	4261	protein_coding	cytokine receptor-like factor 3 [Source:MGI Symbol;Acc:MGI:1860086]	-	794	1181	918	1199	1718	1588	1499	39.6907	49.9021	43.6334	48.9163	68.9716	69.9359	62.0676
ENSMUSG00000023908	115.255	115.369	125.811	94.1945	205.586	186.717	170.024	-0.662463	2.81816e-05	0.00048184	Pkmyt1	17	23726336	23736735	+	3643	protein_coding	protein kinase, membrane associated tyrosine/threonine 1 [Source:MGI Symbol;Acc:MGI:2137630]	-	100	125	127	105	215	178	168	3.21894	3.40114	3.88709	2.75847	5.55816	5.04795	4.47938
ENSMUSG00000111895	79.5257	106.14	90.1483	98.68	120.483	140.562	229.735	-0.66123	0.000916312	0.00887788	Gm47252	4	156254501	156255352	+	611	antisense	predicted gene, 47252 [Source:MGI Symbol;Acc:MGI:6096080]	-	69	115	91	110	126	134	227	7.67742	10.8159	9.62754	9.98907	11.2594	13.1357	20.9212
ENSMUSG00000100783	27.6611	31.3805	30.7099	23.3244	52.5919	70.2812	37.4459	-0.660499	0.00504938	0.0334417	2310047D07Rik	5	149231332	149237984	+	823	lincRNA	RIKEN cDNA 2310047D07 gene [Source:MGI Symbol;Acc:MGI:1916907]	-	24	34	31	26	55	67	37	2.26299	2.70989	2.77934	2.00084	4.16499	5.56581	2.88981
ENSMUSG00000032902	2261.3	2634.11	2118.98	2408.69	3998.89	3634.69	3709.16	-0.660312	9.59841e-13	7.58653e-11	Slc16a1	3	104638668	104658462	+	4426	protein_coding	solute carrier family 16 (monocarboxylic acid transporters), member 1 [Source:MGI Symbol;Acc:MGI:106013]	-	1962	2854	2139	2685	4182	3465	3665	30.1367	37.0553	31.2403	33.6594	51.5892	46.89	46.6299
ENSMUSG00000000276	5313.24	4456.03	3426.63	4482.76	6954.56	6822.52	7783.68	-0.660207	9.11889e-08	2.96627e-06	Dgke	11	89035179	89066850	-	8387	protein_coding	diacylglycerol kinase, epsilon [Source:MGI Symbol;Acc:MGI:1889276]	-	4610	4828	3459	4997	7273	6504	7691	54.9355	48.6317	39.1932	48.599	69.6056	68.2831	75.9153
ENSMUSG00000021803	13774.1	13591.4	11431	12601.4	20360.7	19858.1	21463.6	-0.659821	9.35124e-15	1.0467e-12	Cdhr1	14	37077857	37098347	-	4332	protein_coding	cadherin-related family member 1 [Source:MGI Symbol;Acc:MGI:2157782]	-	11951	14726	11539	14047	21293	18931	21208	187.553	195.346	172.185	179.916	268.37	261.742	275.685
ENSMUSG00000074384	61.085	71.9905	68.3542	68.1789	137.695	157.346	67.8074	-0.657635	0.00242838	0.0190518	AI429214	8	36993604	36995533	+	1930	protein_coding	expressed sequence AI429214 [Source:MGI Symbol;Acc:MGI:2142538]	-	53	78	69	76	144	150	67	1.86692	2.32244	2.31104	2.18489	4.07372	4.65503	1.95488
ENSMUSG00000020878	46.1019	59.9921	28.7286	41.2662	87.0156	77.624	72.8676	-0.656828	0.00265299	0.0204053	Lrrc46	11	97034602	97041407	-	1336	protein_coding	leucine rich repeat containing 46 [Source:MGI Symbol;Acc:MGI:1916547]	-	40	65	29	46	91	74	72	2.03545	2.79586	1.40316	1.9104	3.71896	3.31752	3.03479
ENSMUSG00000066026	807.935	898.036	819.26	863.898	1468.75	1266.11	1331.86	-0.655894	1.19301e-12	9.26692e-11	Dhrs3	4	144892827	144928209	+	2927	protein_coding	dehydrogenase/reductase (SDR family) member 3 [Source:MGI Symbol;Acc:MGI:1315215]	-	701	973	827	963	1536	1207	1316	37.3486	43.8198	41.8958	41.8744	65.7244	56.6559	58.0775
ENSMUSG00000036110	23.0509	50.7625	34.6724	33.1923	56.4167	65.0363	75.9038	-0.655731	0.00427163	0.0292141	Slc17a2	13	23806993	23825180	+	5956	protein_coding	solute carrier family 17 (sodium phosphate), member 2 [Source:MGI Symbol;Acc:MGI:2443098]	-	20	55	35	37	59	62	75	0.398383	0.92605	0.662899	0.601505	0.943848	1.08804	1.23745
ENSMUSG00000116802	200.543	206.742	177.325	218.89	307.901	340.916	330.941	-0.654972	3.08108e-07	8.70285e-06	AC129328.1	17	17234872	17266063	+	2322	lincRNA	novel transcript	-	174	224	179	244	322	325	327	7.46795	8.12645	7.30488	8.54689	11.0991	12.289	11.6251
ENSMUSG00000108574	29.9662	32.3034	34.6724	26.0156	36.3362	57.6935	80.964	-0.654456	0.00599973	0.0381784	Gm44981	6	91711336	91713278	-	1943	TEC	predicted gene 44981 [Source:MGI Symbol;Acc:MGI:5753557]	-	26	35	35	29	38	55	80	0.90972	1.03515	1.16442	0.82813	1.06782	1.69542	2.31857
ENSMUSG00000003810	3984.35	3469.39	2822.34	3470.84	5085.16	5594.17	5912.4	-0.654032	4.32335e-09	1.75475e-07	Mast2	4	116306762	116464183	-	7645	protein_coding	microtubule associated serine/threonine kinase 2 [Source:MGI Symbol;Acc:MGI:894676]	-	3457	3759	2849	3869	5318	5333	5842	114.365	105.116	89.6181	104.462	141.294	155.435	160.086
ENSMUSG00000045257	53.0172	86.7578	86.1858	63.6934	125.264	131.122	116.386	-0.653694	0.000584949	0.00619351	Morn2	17	80290203	80297476	+	656	protein_coding	MORN repeat containing 2 [Source:MGI Symbol;Acc:MGI:2674071]	-	46	94	87	71	131	125	115	4.81118	8.31041	8.65209	6.06064	11.0038	11.5182	9.96292
ENSMUSG00000025496	1658.52	1730.54	1817.83	1847.11	2768.24	3049.36	2615.14	-0.653418	3.33948e-14	3.45867e-12	Drd4	7	141292006	141296464	+	3381	protein_coding	dopamine receptor D4 [Source:MGI Symbol;Acc:MGI:94926]	-	1439	1875	1835	2059	2895	2907	2584	53.2548	58.6543	64.5717	62.19	86.045	94.7817	79.211
ENSMUSG00000097523	19.5933	17.5362	15.8503	14.3534	30.5989	31.4692	37.4459	-0.652975	0.00836141	0.0483727	1700022N22Rik	17	25985815	25988469	+	709	lincRNA	RIKEN cDNA 1700022N22 gene [Source:MGI Symbol;Acc:MGI:1916681]	-	17	19	16	16	32	30	37	1.63008	1.53998	1.45878	1.25212	2.46428	2.53433	2.93872
ENSMUSG00000084907	71.4579	71.9905	86.1858	73.5614	115.702	147.905	119.422	-0.652945	0.000213869	0.00267834	Gm14505	X	14796735	14839980	+	831	lincRNA	predicted gene 14505 [Source:MGI Symbol;Acc:MGI:3705173]	-	62	78	87	82	121	141	118	5.07222	5.39388	6.76758	5.47503	7.95007	10.1626	7.99619
ENSMUSG00000109684	21.8984	30.4575	44.5789	26.0156	43.9859	78.673	53.6387	-0.651487	0.00666136	0.0411966	Gm45745	8	25103489	25104668	-	1180	TEC	predicted gene 45745 [Source:MGI Symbol;Acc:MGI:5804860]	-	19	33	45	29	46	75	53	1.09466	1.60709	2.46516	1.36361	2.12844	3.80687	2.52928
ENSMUSG00000042606	684.613	790.05	682.552	745.482	1194.31	1200.03	1082.89	-0.651213	1.07418e-11	6.98837e-10	Hirip3	7	126861972	126865377	+	3265	protein_coding	HIRA interacting protein 3 [Source:MGI Symbol;Acc:MGI:2142364]	-	594	856	689	831	1249	1144	1070	39.5907	48.226	43.6651	45.2037	66.8573	67.176	59.0726
ENSMUSG00000056687	248.95	229.816	167.418	171.344	348.063	387.071	280.338	-0.650818	6.66612e-05	0.000996105	Gm11696	11	109352835	109363654	-	4250	antisense	predicted gene 11696 [Source:MGI Symbol;Acc:MGI:3701776]	-	216	249	169	191	364	369	277	10.572	10.3016	7.86502	7.62965	14.3082	15.9116	11.23
ENSMUSG00000027589	9919.97	10782	8262.94	10053.7	15943.9	16266.4	14515.8	-0.650576	3.2056e-11	1.86349e-09	Pcmtd2	2	181837854	181857461	+	4183	protein_coding	protein-L-isoaspartate (D-aspartate) O-methyltransferase domain containing 2 [Source:MGI Symbol;Acc:MGI:1923927]	-	8607	11682	8341	11207	16674	15507	14343	426.176	488.939	392.702	452.89	663.064	676.466	588.263
ENSMUSG00000022994	2454.92	2875.93	2390.42	2641.03	3955.86	4248.34	4156.49	-0.650011	8.40671e-14	8.14501e-12	Adcy6	15	98589973	98610076	-	6782	protein_coding	adenylate cyclase 6 [Source:MGI Symbol;Acc:MGI:87917]	-	2130	3116	2413	2944	4137	4050	4107	52.1824	64.5271	56.2095	58.8638	81.3971	87.4139	83.342
ENSMUSG00000049291	34.5764	21.228	55.4759	34.0894	95.6216	61.8894	51.6146	-0.649895	0.00746295	0.0446365	Prss38	11	59372669	59375657	-	1243	protein_coding	protease, serine 38 [Source:MGI Symbol;Acc:MGI:2685095]	-	30	23	56	38	100	59	51	1.64081	1.06332	2.91227	1.69623	4.39253	2.84295	2.31048
ENSMUSG00000032463	1113.36	1578.25	1270.99	1353.71	2535.88	2144.1	1787.28	-0.649583	9.18152e-07	2.33042e-05	Faim	9	98986373	99002021	+	5745	protein_coding	Fas apoptotic inhibitory molecule [Source:MGI Symbol;Acc:MGI:1344387]	-	966	1710	1283	1509	2652	2044	1766	43.1206	64.5214	54.4555	54.9747	95.0736	80.384	65.297
ENSMUSG00000042726	3027.74	3398.32	2891.68	2896.71	5200.86	5029.83	4353.84	-0.648298	6.82031e-12	4.62063e-10	Trafd1	5	121371725	121385632	-	4486	protein_coding	TRAF type zinc finger domain containing 1 [Source:MGI Symbol;Acc:MGI:1923551]	-	2627	3682	2919	3229	5439	4795	4302	135.401	160.416	143.056	135.83	225.144	217.737	183.666
ENSMUSG00000043421	114.102	138.443	134.727	112.136	249.572	202.452	169.012	-0.647151	9.64745e-05	0.00136038	Hilpda	6	29272488	29275446	+	1103	protein_coding	hypoxia inducible lipid droplet associated [Source:MGI Symbol;Acc:MGI:1916823]	-	99	150	136	125	261	193	167	8.20784	10.512	10.7211	8.45804	17.3785	14.0972	11.4685
ENSMUSG00000114515	280.069	237.2	268.464	292.451	281.127	489.87	589.013	-0.646259	0.000351678	0.00405476	Aldoa	7	126800790	126809108	-	799	protein_coding	aldolase A, fructose-bisphosphate [Source:MGI Symbol;Acc:MGI:87994]	-	243	257	271	326	294	467	582	21.4547	19.1801	22.7507	23.4909	20.847	36.3258	42.5632
ENSMUSG00000032343	4785.37	4522.48	3780.29	4149.04	6753.75	6541.4	7247.29	-0.645811	8.46426e-12	5.62858e-10	Impg1	9	80313330	80465481	-	3630	protein_coding	interphotoreceptor matrix proteoglycan 1 [Source:MGI Symbol;Acc:MGI:1926876]	-	4152	4900	3816	4625	7063	6236	7161	119.001	118.711	103.994	108.186	162.578	157.464	170.005
ENSMUSG00000086942	55.3223	29.5346	30.7099	37.6778	53.5481	70.2812	85.0122	-0.645766	0.00485044	0.03241	Gm15489	7	122139008	122159401	-	973	antisense	predicted gene 15489 [Source:MGI Symbol;Acc:MGI:3705099]	-	48	32	31	42	56	67	84	3.35379	1.88993	2.05951	2.39502	3.1424	4.1243	4.86148
ENSMUSG00000067158	277.764	290.731	218.932	296.04	423.604	441.618	445.302	-0.644827	4.55836e-07	1.23158e-05	Col4a4	1	82448423	82586849	-	10612	protein_coding	collagen, type IV, alpha 4 [Source:MGI Symbol;Acc:MGI:104687]	-	241	315	221	330	443	421	440	2.882	3.18411	2.51291	3.22075	4.25461	4.43548	4.35837
ENSMUSG00000097892	16.1357	33.2264	22.7847	40.3691	52.5919	55.5956	52.6266	-0.643216	0.0073399	0.0442531	Gm26801	1	177428338	177443270	-	1791	antisense	predicted gene, 26801 [Source:MGI Symbol;Acc:MGI:5477295]	-	14	36	23	45	55	53	52	1.04133	2.26342	1.62666	2.73174	3.28551	3.47311	3.20376
ENSMUSG00000025857	150.984	181.822	182.278	134.564	258.178	285.321	249.976	-0.642014	1.34356e-05	0.000249354	Dnaaf5	5	139150223	139186510	+	3514	protein_coding	dynein, axonemal assembly factor 5 [Source:MGI Symbol;Acc:MGI:3616079]	-	131	197	184	150	270	272	247	4.21084	5.35259	5.62371	3.93509	6.97011	7.70277	6.57641
ENSMUSG00000054074	1583.6	1725.93	1510.73	1631.81	2708.96	2561.59	2376.29	-0.641778	7.14639e-14	7.0761e-12	Skida1	2	18040676	18049051	-	4927	protein_coding	SKI/DACH domain containing 1 [Source:MGI Symbol;Acc:MGI:1919918]	-	1374	1870	1525	1819	2833	2442	2348	52.1262	59.9669	55.0107	56.3207	86.3167	81.6199	73.784
ENSMUSG00000027674	6318.26	6822.49	5413.85	6073.3	9725.67	10551.6	8989.03	-0.640858	2.50629e-11	1.51057e-09	Pex5l	3	32949408	33143247	-	8846	protein_coding	peroxisomal biogenesis factor 5-like [Source:MGI Symbol;Acc:MGI:1916672]	-	5482	7392	5465	6770	10171	10059	8882	131.46	149.836	124.61	132.498	195.883	212.515	176.425
ENSMUSG00000023982	7495.01	9239.71	6715.56	7528.38	14008.6	12240.5	10873.5	-0.640823	3.75735e-08	1.30465e-06	Guca1a	17	47394558	47400584	-	873	protein_coding	guanylate cyclase activator 1a (retina) [Source:MGI Symbol;Acc:MGI:102770]	-	6503	10011	6779	8392	14650	11669	10744	506.415	658.978	501.957	533.365	916.241	800.586	693.033
ENSMUSG00000108841	2930.93	2881.47	2481.56	2846.47	4010.37	4526.32	4671.62	-0.639923	2.5086e-12	1.86808e-10	Frmpd2	14	33471696	33575269	+	6438	protein_coding	FERM and PDZ domain containing 2 [Source:MGI Symbol;Acc:MGI:2685472]	-	2543	3122	2505	3173	4194	4315	4616	74.0084	76.8012	69.3187	75.3652	98.0261	110.636	111.274
ENSMUSG00000037325	2129.91	2208.63	1876.27	1897.35	3239.66	3126.99	3228.44	-0.639187	1.244e-13	1.15557e-11	Bbs7	3	36573142	36613477	-	5390	protein_coding	Bardet-Biedl syndrome 7 (human) [Source:MGI Symbol;Acc:MGI:1918742]	-	1848	2393	1894	2115	3388	2981	3190	69.1821	75.7242	67.4186	64.6202	101.862	98.3184	98.9184
ENSMUSG00000028189	247.798	262.119	240.726	209.919	371.012	377.63	403.808	-0.639043	2.03887e-07	6.07315e-06	Ctbs	3	146449795	146465849	+	6052	protein_coding	chitobiase [Source:MGI Symbol;Acc:MGI:1921495]	-	215	284	243	234	388	360	399	6.25442	6.98341	6.72145	5.5556	9.06482	9.2264	9.61427
ENSMUSG00000036192	4665.51	3637.37	2449.86	3433.17	4876.7	6095.58	6417.41	-0.639038	4.39994e-05	0.000699218	Rorb	19	18930605	19111196	-	11076	protein_coding	RAR-related orphan receptor beta [Source:MGI Symbol;Acc:MGI:1343464]	THR-like	4048	3941	2473	3827	5100	5811	6341	53.6766	44.1724	31.18	41.416	54.3117	67.8854	69.6461
ENSMUSG00000004127	108.339	124.599	100.055	117.519	188.375	232.872	141.687	-0.639013	0.000286563	0.00341318	Trmt10a	3	138143448	138159821	+	7976	protein_coding	tRNA methyltransferase 10A [Source:MGI Symbol;Acc:MGI:1920421]	-	94	135	101	131	197	222	140	2.72982	3.31391	2.78892	3.10487	4.59464	5.67989	3.36767
ENSMUSG00000097099	29.9662	27.6887	28.7286	25.1185	50.6794	52.4487	46.5543	-0.638325	0.00451641	0.030667	Gm9917	9	107558809	107568415	-	6021	antisense	predicted gene 9917 [Source:MGI Symbol;Acc:MGI:3704343]	-	26	30	29	28	53	50	46	0.890472	0.868498	0.944393	0.782656	1.45781	1.50868	1.30497
ENSMUSG00000050930	512.883	570.386	417.06	449.442	812.783	825.542	701.351	-0.637779	2.80585e-07	8.02608e-06	Map10	8	125669818	125673359	+	3542	protein_coding	microtubule-associated protein 10 [Source:MGI Symbol;Acc:MGI:1921643]	-	445	618	421	501	850	787	693	8.5412	10.0265	7.68332	7.84807	13.1026	13.3081	11.0176
ENSMUSG00000043987	4617.1	4906.43	4044.79	4527.62	6529.04	7266.24	7621.75	-0.637433	2.93148e-12	2.11313e-10	Cep164	9	45766946	45828691	-	9996	protein_coding	centrosomal protein 164 [Source:MGI Symbol;Acc:MGI:2384878]	-	4006	5316	4083	5047	6828	6927	7531	105.847	118.728	102.578	108.835	144.891	161.248	164.822
ENSMUSG00000022092	1431.46	1666.86	1323.5	1311.55	2381.93	2353.9	2079.76	-0.63673	1.23093e-09	5.46371e-08	Ppp3cc	14	70217865	70289471	-	2985	protein_coding	protein phosphatase 3, catalytic subunit, gamma isoform [Source:MGI Symbol;Acc:MGI:107162]	-	1242	1806	1336	1462	2491	2244	2055	40.2077	49.4204	41.1247	38.6279	64.7651	64.0018	55.1055
ENSMUSG00000041046	185.56	292.577	258.557	217.993	432.21	344.063	390.651	-0.63646	3.25724e-05	0.000544011	Ramp3	11	6658521	6677475	+	1380	protein_coding	receptor (calcitonin) activity modifying protein 3 [Source:MGI Symbol;Acc:MGI:1860292]	-	161	317	261	243	452	328	386	8.53113	14.1984	13.1501	10.5088	19.2353	15.3121	16.9419
ENSMUSG00000096740	963.529	1030.02	732.084	920.415	1579.67	1441.29	1337.93	-0.636083	9.14295e-08	2.96874e-06	Lbhd1	19	8883732	8892627	+	3281	protein_coding	LBH domain containing 1 [Source:MGI Symbol;Acc:MGI:5516029]	-	836	1116	739	1026	1652	1374	1322	43.1875	48.7322	36.2998	43.2579	68.5394	62.5345	56.5689
ENSMUSG00000022639	273.154	249.198	259.548	359.733	373.88	511.899	509.061	-0.636004	3.31691e-05	0.00055193	Dubr	16	50719294	50732773	-	4679	lincRNA	Dppa2 upstream binding RNA [Source:MGI Symbol;Acc:MGI:1915440]	-	237	270	262	401	391	488	503	7.95666	7.66208	8.36357	10.9873	10.5424	14.4339	13.9877
ENSMUSG00000041308	2734.99	2766.1	2085.3	2558.5	3764.62	4020.71	4267.82	-0.635253	2.22461e-09	9.49993e-08	Sntb2	8	106935750	107019714	+	10350	protein_coding	syntrophin, basic 2 [Source:MGI Symbol;Acc:MGI:101771]	-	2373	2997	2105	2852	3937	3833	4217	34.664	37.0057	29.2376	34.0014	46.1876	49.3289	51.0246
ENSMUSG00000057265	177.492	131.06	130.765	133.666	213.236	252.802	230.748	-0.635201	3.41937e-05	0.000567407	Bbof1	12	84409071	84442887	+	4257	protein_coding	basal body orientation factor 1 [Source:MGI Symbol;Acc:MGI:1920123]	-	154	142	132	149	223	241	228	7.75522	6.04453	6.32056	6.12387	9.01898	10.6923	9.5105
ENSMUSG00000111394	1447.6	1335.52	1143.2	1388.7	1754.66	2196.55	2399.57	-0.635191	9.75636e-08	3.13963e-06	AC160637.1	9	59672814	59676700	+	3887	TEC	novel transcript	-	1256	1447	1154	1548	1835	2094	2371	21.9676	21.3925	19.1914	22.0968	25.7755	32.2664	34.3494
ENSMUSG00000031142	6062.4	6404.39	5959.7	5672.3	8928.19	9875.03	9539.59	-0.635122	5.8892e-17	8.69912e-15	Cacna1f	X	7607083	7635196	+	9089	protein_coding	calcium channel, voltage-dependent, alpha 1F subunit [Source:MGI Symbol;Acc:MGI:1859639]	-	5260	6939	6016	6323	9337	9414	9426	112.064	124.962	121.87	109.944	159.76	176.7	166.342
ENSMUSG00000074817	47.2544	41.533	39.6256	39.472	69.8038	73.4281	71.8556	-0.633948	0.00176524	0.0148512	Papolb	5	142525838	142530076	-	4239	protein_coding	poly (A) polymerase beta (testis specific) [Source:MGI Symbol;Acc:MGI:1932115]	-	41	45	40	44	73	70	71	0.657549	0.610038	0.609975	0.575921	0.940255	0.989061	0.943186
ENSMUSG00000065036	24.2035	33.2264	22.7847	21.5302	43.0297	50.3507	46.5543	-0.633862	0.00665279	0.0411851	Gm22362	6	131380273	131380406	-	134	snoRNA	predicted gene, 22362 [Source:MGI Symbol;Acc:MGI:5452139]	-	21	36	23	24	45	48	46	10.6542	15.4385	11.0953	9.93756	18.3356	21.4548	19.331
ENSMUSG00000032743	3423.06	3597.68	2964.99	3313.85	5120.54	5263.75	5278.86	-0.633855	4.24355e-14	4.2485e-12	D430042O09Rik	7	125707888	125874793	+	17086	protein_coding	RIKEN cDNA D430042O09 gene [Source:MGI Symbol;Acc:MGI:2442760]	-	2970	3898	2993	3694	5355	5018	5216	50.9623	56.5373	48.8323	51.7316	73.7957	75.8586	74.1354
ENSMUSG00000056458	311.188	389.487	364.556	386.646	610.066	630.433	498.941	-0.632806	4.10645e-07	1.11786e-05	Mok	12	110807798	110840939	-	3405	protein_coding	MOK protein kinase [Source:MGI Symbol;Acc:MGI:1336881]	-	270	422	368	431	638	601	493	11.8348	15.6354	15.3374	15.4184	22.4592	23.2087	17.8994
ENSMUSG00000023913	1338.11	1397.35	1191.74	1374.34	2217.46	2124.17	1910.75	-0.631607	1.19085e-11	7.69187e-10	Pla2g7	17	43568098	43612201	+	2905	protein_coding	phospholipase A2, group VII (platelet-activating factor acetylhydrolase, plasma) [Source:MGI Symbol;Acc:MGI:1351327]	-	1161	1514	1203	1532	2319	2025	1888	71.7541	79.0936	70.6949	77.2751	115.105	110.261	96.6522
ENSMUSG00000073791	44.9493	49.8396	51.5133	53.8254	96.5778	79.722	77.9279	-0.6313	0.00126886	0.0115486	Efcab7	4	99829198	99912788	+	2252	protein_coding	EF-hand calcium binding domain 7 [Source:MGI Symbol;Acc:MGI:2385199]	-	39	54	52	60	101	76	77	4.04174	4.7304	5.12407	5.07482	8.40628	6.93902	6.60981
ENSMUSG00000048546	3728.49	3470.31	3080.89	4006.41	5791.8	5317.24	5760.59	-0.631299	9.99825e-11	5.34654e-09	Tob2	15	81848272	81858796	-	6664	protein_coding	transducer of ERBB2, 2 [Source:MGI Symbol;Acc:MGI:1888525]	-	3235	3760	3110	4466	6057	5069	5692	107.125	105.246	97.9235	120.699	161.085	147.884	156.127
ENSMUSG00000050786	2272.82	2455.98	1992.18	2406	3866.94	3536.09	3361.02	-0.630288	4.89607e-11	2.7659e-09	Ccdc126	6	49319274	49341582	+	2421	protein_coding	coiled-coil domain containing 126 [Source:MGI Symbol;Acc:MGI:1889376]	-	1972	2661	2011	2682	4044	3371	3321	56.783	64.7674	55.0594	63.0284	93.5194	85.5168	79.2091
ENSMUSG00000053205	792.952	716.213	529.002	722.158	956.216	1162.26	1192.2	-0.630233	2.41728e-06	5.51415e-05	Styx	14	45351093	45422820	+	16150	protein_coding	serine/threonine/tyrosine interaction protein [Source:MGI Symbol;Acc:MGI:1891150]	-	688	776	534	805	1000	1108	1178	16.0622	15.3136	11.854	15.3383	18.7497	22.7896	22.7801
ENSMUSG00000014164	1573.23	1259.83	1040.17	1226.32	1855.06	2008.78	2224.49	-0.629944	6.01131e-07	1.57915e-05	Klhl3	13	58000228	58113592	-	7322	protein_coding	kelch-like 3 [Source:MGI Symbol;Acc:MGI:2445185]	-	1365	1365	1050	1367	1940	1915	2198	13.238	11.1898	9.68248	10.8199	15.1102	16.3621	17.6568
ENSMUSG00000024901	1618.18	1724.08	1350.24	1522.36	2415.4	2353.9	2560.49	-0.629843	9.13751e-11	4.9008e-09	Peli3	19	4930651	4943127	-	3786	protein_coding	pellino 3 [Source:MGI Symbol;Acc:MGI:1924963]	-	1404	1868	1363	1697	2526	2244	2530	88.9559	100.043	82.1129	87.7517	128.535	125.26	132.777
ENSMUSG00000110393	54.1697	54.4544	54.4853	34.9865	66.9351	80.7709	111.326	-0.629584	0.00362372	0.0259345	Gm36445	13	65241753	65250154	+	2840	lincRNA	predicted gene, 36445 [Source:MGI Symbol;Acc:MGI:5595604]	-	47	59	55	39	70	77	110	2.44099	2.59012	2.71605	1.6531	2.91974	3.52322	4.73212
ENSMUSG00000037936	2275.13	2203.09	1928.78	2158.4	3144.99	3601.12	3323.57	-0.629365	1.29129e-12	9.98726e-11	Scarb1	5	125277087	125341094	-	8500	protein_coding	scavenger receptor class B, member 1 [Source:MGI Symbol;Acc:MGI:893578]	-	1974	2387	1947	2406	3289	3433	3284	92.4884	94.5351	86.7389	92.0029	123.761	141.708	127.449
ENSMUSG00000041534	62144.2	51513.8	42254.8	52452	81622.6	77431	88265	-0.629151	3.74106e-08	1.3015e-06	Rbp3	14	33954003	33964216	+	5295	protein_coding	retinol binding protein 3, interstitial [Source:MGI Symbol;Acc:MGI:97878]	-	53919	55814	42654	58469	85360	73816	87214	692.282	605.738	520.726	612.679	880.187	834.974	927.519
ENSMUSG00000096768	134.848	231.662	333.846	165.065	390.136	426.932	296.531	-0.628738	0.00231984	0.0183359	Gm47283	Y	90784738	90816464	+	1124	protein_coding	predicted gene, 47283 [Source:MGI Symbol;Acc:MGI:6096131]	-	117	251	337	184	408	407	293	10.4112	18.8794	28.5136	13.3628	29.1577	31.9073	21.5962
ENSMUSG00000042225	605.087	557.465	435.882	554.402	748.717	869.599	951.327	-0.628596	7.66889e-07	1.96308e-05	Ammecr1	X	142851146	142966728	-	5437	protein_coding	Alport syndrome, mental retardation, midface hypoplasia and elliptocytosis chromosomal region gene 1 [Source:MGI Symbol;Acc:MGI:1860206]	-	525	604	440	618	783	829	940	6.56459	6.38389	5.23129	6.30671	7.86301	9.13238	9.73578
ENSMUSG00000019845	399.934	447.633	336.818	473.664	651.183	710.155	619.375	-0.628351	6.95769e-07	1.79811e-05	Tube1	10	39133976	39152542	+	7838	protein_coding	epsilon-tubulin 1 [Source:MGI Symbol;Acc:MGI:1919174]	-	347	485	340	528	681	677	612	9.87876	11.6712	9.20365	12.268	15.5704	16.9802	14.4318
ENSMUSG00000072761	42.6442	57.2232	60.4291	59.208	92.7529	84.9668	100.193	-0.627613	0.00119661	0.0110327	Gm6712	17	17294443	17319511	+	594	lincRNA	predicted gene 6712 [Source:MGI Symbol;Acc:MGI:3645888]	-	37	62	61	66	97	81	99	5.17575	7.331	8.11351	7.53496	10.8974	9.98245	11.471
ENSMUSG00000014782	252.408	329.495	328.893	259.259	457.071	503.507	440.242	-0.627507	1.90132e-06	4.48478e-05	Plekhg4	8	105373274	105382862	+	5478	protein_coding	pleckstrin homology domain containing, family G (with RhoGef domain) member 4 [Source:MGI Symbol;Acc:MGI:2142544]	-	219	357	332	289	478	480	435	4.97777	6.85898	7.17525	5.36111	8.72565	9.61199	8.18984
ENSMUSG00000107240	373.425	385.795	323.94	266.436	471.414	624.139	529.302	-0.627494	1.30054e-05	0.00024262	Gm43231	5	115427218	115429475	-	2258	TEC	predicted gene 43231 [Source:MGI Symbol;Acc:MGI:5663368]	-	324	418	327	297	493	595	523	9.75503	10.638	9.36136	7.29804	11.9209	15.7827	13.0431
ENSMUSG00000035919	1638.92	1618.86	1235.33	1442.52	2358.03	2267.88	2375.28	-0.626018	2.8132e-09	1.1845e-07	Bbs9	9	22475715	22888280	+	6243	protein_coding	Bardet-Biedl syndrome 9 (human) [Source:MGI Symbol;Acc:MGI:2442833]	-	1422	1754	1247	1608	2466	2162	2347	52.2559	54.4836	43.5723	48.2267	72.7793	69.9959	71.4404
ENSMUSG00000018574	685.765	1108.47	864.83	783.16	1439.1	1691.99	1057.59	-0.625691	8.60771e-05	0.00123405	Acadvl	11	70010183	70015411	-	2686	protein_coding	acyl-Coenzyme A dehydrogenase, very long chain [Source:MGI Symbol;Acc:MGI:895149]	-	595	1201	873	873	1505	1613	1045	36.3111	61.9535	50.6576	43.4813	73.7628	86.7237	52.8243
ENSMUSG00000104822	32.2713	27.6887	31.7005	30.5011	38.2486	58.7425	67.8074	-0.625137	0.00666943	0.0412173	Gm42967	3	152380857	152383168	-	2312	TEC	predicted gene 42967 [Source:MGI Symbol;Acc:MGI:5663104]	-	28	30	32	34	40	56	67	0.823337	0.745661	0.8947	0.815952	0.944623	1.45074	1.63188
ENSMUSG00000033486	93.3563	83.066	98.0735	75.3556	119.527	174.13	138.651	-0.624009	0.000499316	0.0054304	Catsper2	2	121392631	121413792	-	3695	protein_coding	cation channel, sperm associated 2 [Source:MGI Symbol;Acc:MGI:2387404]	-	81	90	99	84	125	166	137	3.90547	3.66802	4.5387	3.30547	4.84036	7.05144	5.47147
ENSMUSG00000029790	262.781	256.582	209.025	204.537	353.8	418.54	343.085	-0.623557	6.4211e-06	0.000132245	Cep41	6	30653457	30693749	-	4979	protein_coding	centrosomal protein 41 [Source:MGI Symbol;Acc:MGI:1891414]	-	228	278	211	228	370	399	339	10.5588	10.8824	9.2912	8.61752	13.7614	16.2793	13.004
ENSMUSG00000032593	205.153	155.057	164.446	159.682	228.536	271.684	326.892	-0.62281	6.97137e-05	0.00103485	Amigo3	9	108053159	108055701	+	2543	protein_coding	adhesion molecule with Ig like domain 3 [Source:MGI Symbol;Acc:MGI:2444854]	-	178	168	166	178	239	259	323	4.75862	3.79639	4.21966	3.88371	5.13142	6.10017	7.15251
ENSMUSG00000105710	102.577	95.9874	84.2045	99.577	108.052	189.864	180.145	-0.622248	0.00103003	0.00975597	Gm43859	3	152383806	152385217	-	1412	TEC	predicted gene 43859 [Source:MGI Symbol;Acc:MGI:5663996]	-	89	104	85	111	113	181	178	4.28512	4.23259	3.89134	4.36176	4.36948	7.67772	7.09884
ENSMUSG00000034349	593.562	563.003	510.18	579.52	834.776	849.668	953.352	-0.622152	7.15891e-10	3.33361e-08	Smc4	3	69004738	69034623	+	5210	protein_coding	structural maintenance of chromosomes 4 [Source:MGI Symbol;Acc:MGI:1917349]	-	515	610	515	646	873	810	942	21.8551	21.8814	20.7807	22.374	29.7535	30.2838	33.1124
ENSMUSG00000032715	96.8139	108.909	112.933	98.68	170.206	156.297	178.121	-0.621837	5.92102e-05	0.000900444	Trib3	2	152337422	152344032	-	2125	protein_coding	tribbles pseudokinase 3 [Source:MGI Symbol;Acc:MGI:1345675]	-	84	118	114	110	178	149	176	5.40783	6.42134	6.97841	5.77966	9.20328	8.45105	9.38536
ENSMUSG00000110997	222.442	192.898	204.072	200.051	288.777	345.112	339.037	-0.620932	1.46655e-06	3.56662e-05	2610028D06Rik	9	45797348	45799060	-	1713	TEC	RIKEN cDNA 2610028D06 gene [Source:MGI Symbol;Acc:MGI:1923609]	-	193	209	206	223	302	329	335	7.65962	7.01127	7.77365	7.22306	9.62578	11.5034	11.0126
ENSMUSG00000037386	5408.9	4368.35	3853.59	4686.4	6457.33	7297.71	7844.4	-0.62031	5.73317e-08	1.92397e-06	Rims2	15	39198261	39684372	+	10389	protein_coding	regulating synaptic membrane exocytosis 2 [Source:MGI Symbol;Acc:MGI:2152972]	-	4693	4733	3890	5224	6753	6957	7751	135.248	115.297	106.595	122.871	156.299	176.637	185.026
ENSMUSG00000024556	671.935	631.302	475.508	587.594	944.741	891.627	958.412	-0.620251	1.86712e-07	5.65503e-06	Me2	18	73770040	73815392	-	2455	protein_coding	malic enzyme 2, NAD(+)-dependent, mitochondrial [Source:MGI Symbol;Acc:MGI:2147351]	-	583	684	480	655	988	850	947	16.1445	16.0108	12.6388	14.8035	21.9731	20.7375	21.7221
ENSMUSG00000070044	1598.58	1521.03	1292.79	1689.22	2249.98	2316.13	2597.93	-0.619383	3.80457e-09	1.55823e-07	Fam149a	8	45336717	45382291	-	5954	protein_coding	family with sequence similarity 149, member A [Source:MGI Symbol;Acc:MGI:2387177]	-	1387	1648	1305	1883	2353	2208	2567	21.8526	21.9475	19.5499	24.2127	29.7733	30.6483	33.5002
ENSMUSG00000110148	108.339	114.446	102.036	93.2974	172.119	178.325	153.832	-0.618188	8.10136e-05	0.00117265	5830408C22Rik	8	25101216	25109986	+	4169	processed_transcript	RIKEN cDNA 5830408C22 gene [Source:MGI Symbol;Acc:MGI:1921994]	-	94	124	103	104	180	170	152	5.3477	5.96296	5.57166	4.8288	8.22415	8.52059	7.16272
ENSMUSG00000071653	74.9156	79.3742	71.3262	73.5614	105.184	135.318	126.506	-0.617808	0.000408665	0.00460861	1810009A15Rik	19	8888853	8890881	+	1444	protein_coding	RIKEN cDNA 1810009A15 gene [Source:MGI Symbol;Acc:MGI:1913526]	-	65	86	72	82	110	129	125	5.95548	6.66043	6.27255	6.13174	8.09422	10.413	9.48655
ENSMUSG00000117027	49.5595	37.8412	48.5414	53.8254	64.0665	89.1627	89.0604	-0.617798	0.00289714	0.0219091	CT025652.1	17	28318186	28319602	-	771	antisense	novel transcript, antisense to Fance	-	43	41	49	60	67	85	88	3.79159	3.05589	4.10825	4.31788	4.74468	6.60318	6.42733
ENSMUSG00000115222	43.7968	58.1462	68.3542	78.944	105.184	97.5545	112.338	-0.617331	0.00184208	0.015343	AC174678.1	14	55643604	55646352	+	2749	antisense	novel transcript, antisense to Tm9sf1	-	38	63	69	88	110	93	111	0.939759	1.31696	1.62252	1.77616	2.18476	2.02627	2.27379
ENSMUSG00000067219	139.458	115.369	107.98	122.901	195.068	178.325	208.482	-0.615699	5.34733e-05	0.000824331	Nipal1	5	72647795	72671078	+	4393	protein_coding	NIPA-like domain containing 1 [Source:MGI Symbol;Acc:MGI:1917951]	-	121	125	109	137	204	170	206	4.73035	4.13065	4.05175	4.37114	6.40497	5.85515	6.67068
ENSMUSG00000016356	364.205	394.102	486.405	385.749	577.554	670.294	678.074	-0.61563	6.44643e-07	1.6812e-05	Col20a1	2	180986535	181018363	+	5142	protein_coding	collagen, type XX, alpha 1 [Source:MGI Symbol;Acc:MGI:1920618]	-	316	427	491	430	604	639	670	7.4387	8.49647	10.99	8.26123	11.4189	13.2523	13.0641
ENSMUSG00000108738	57.6273	54.4544	41.6069	80.7381	82.2346	131.122	91.0845	-0.61536	0.0045246	0.0307012	Gm44777	7	116334255	116338633	+	4379	antisense	predicted gene 44777 [Source:MGI Symbol;Acc:MGI:5753353]	-	50	59	42	90	86	125	90	1.56645	1.56243	1.25114	2.30121	2.16384	3.45016	2.33553
ENSMUSG00000038963	2050.38	2300.93	2068.46	1959.25	3249.22	3487.84	3013.89	-0.614721	5.52779e-12	3.77334e-10	Slco4a1	2	180456245	180474867	+	4799	protein_coding	solute carrier organic anion transporter family, member 4a1 [Source:MGI Symbol;Acc:MGI:1351866]	-	1779	2493	2088	2184	3398	3325	2978	50.0802	59.3216	55.8893	50.1775	76.8232	82.4637	69.44
ENSMUSG00000106887	280.069	352.569	344.743	298.731	566.08	521.34	426.073	-0.614475	3.90065e-06	8.58287e-05	A930005G22Rik	5	115420597	115422500	-	1904	TEC	RIKEN cDNA A930005G22 gene [Source:MGI Symbol;Acc:MGI:3528178]	-	243	382	348	333	592	497	421	8.67654	11.5293	11.8148	9.704	16.9762	15.6343	12.4514
ENSMUSG00000026457	7823.49	8031.56	6911.7	7944.63	12842.9	11226.1	11610.2	-0.614197	5.79723e-13	4.77041e-11	Adipor1	1	134415378	134433351	+	5025	protein_coding	adiponectin receptor 1 [Source:MGI Symbol;Acc:MGI:1919924]	-	6788	8702	6977	8856	13431	10702	11472	201.518	218.369	196.947	214.573	320.228	279.91	282.102
ENSMUSG00000054580	4013.17	3740.74	2773.8	3547.1	5083.24	5722.15	5729.22	-0.613944	1.2773e-07	4.01015e-06	Pla2r1	2	60417543	60553308	-	9618	protein_coding	phospholipase A2 receptor 1 [Source:MGI Symbol;Acc:MGI:102468]	-	3482	4053	2800	3954	5316	5455	5661	101.336	99.7038	77.4819	93.9155	124.251	139.865	136.465
ENSMUSG00000025195	766.444	684.833	674.627	742.791	1089.13	1115.06	1130.46	-0.613672	8.07503e-12	5.38964e-10	Dnmbp	19	43846821	43940191	-	8264	protein_coding	dynamin binding protein [Source:MGI Symbol;Acc:MGI:1917352]	-	665	742	681	828	1139	1063	1117	10.936	10.3143	10.6486	11.1131	15.0432	15.4011	15.2155
ENSMUSG00000034274	1391.12	1362.28	1212.54	1326.8	1901.91	2097.95	2150.61	-0.613419	3.18632e-12	2.28768e-10	Thoc5	11	4895320	4928867	+	2861	protein_coding	THO complex 5 [Source:MGI Symbol;Acc:MGI:1351333]	-	1207	1476	1224	1479	1989	2000	2125	66.6046	68.8468	64.2223	66.6087	88.1476	97.2317	97.1294
ENSMUSG00000039158	758.376	657.144	545.843	643.214	954.303	1002.82	1100.1	-0.613299	1.5299e-07	4.71289e-06	Akna	4	63367125	63403354	-	5765	protein_coding	AT-hook transcription factor [Source:MGI Symbol;Acc:MGI:2140340]	-	658	712	551	717	998	956	1087	14.6812	13.4281	11.6895	13.0563	17.8832	18.792	20.0891
ENSMUSG00000090307	165.967	138.443	114.914	135.461	190.287	234.97	240.868	-0.611702	0.000114815	0.00158126	1700071M16Rik	17	43588340	43592442	-	2883	antisense	RIKEN cDNA 1700071M16 gene [Source:MGI Symbol;Acc:MGI:1920754]	-	144	150	116	151	199	224	238	8.9979	7.92265	6.89199	7.70055	9.98644	12.3313	12.3183
ENSMUSG00000020937	1255.12	1365.05	1176.88	1248.75	2003.27	2027.66	1824.73	-0.61149	2.78467e-12	2.02349e-10	Plcd3	11	103070304	103101658	-	3393	protein_coding	phospholipase C, delta 3 [Source:MGI Symbol;Acc:MGI:107451]	-	1089	1479	1188	1392	2095	1933	1803	56.9498	65.3782	59.0729	59.4113	87.9887	89.0588	78.1007
ENSMUSG00000097042	225.899	272.272	273.417	237.729	346.15	455.254	394.7	-0.611416	5.21091e-06	0.000110089	Gm17491	8	22480291	22483332	+	2311	sense_intronic	predicted gene, 17491 [Source:MGI Symbol;Acc:MGI:4937125]	-	196	295	276	265	362	434	390	5.76585	7.3355	7.72013	6.36238	8.55254	11.2481	9.50314
ENSMUSG00000034832	4022.39	3557.07	2868.9	3822.5	5053.6	5436.83	6242.33	-0.610417	2.12852e-07	6.28822e-06	Tet3	6	83362373	83459084	-	16695	protein_coding	tet methylcytosine dioxygenase 3 [Source:MGI Symbol;Acc:MGI:2446229]	-	3490	3854	2896	4261	5285	5183	6168	48.0779	44.8779	37.9338	47.9069	58.4715	62.9046	70.3817
ENSMUSG00000022911	1142.17	1119.54	933.184	1046.9	1644.69	1605.98	1671.91	-0.609539	6.66087e-11	3.6485e-09	Arl13b	16	62793685	62847040	-	5087	protein_coding	ADP-ribosylation factor-like 13B [Source:MGI Symbol;Acc:MGI:1915396]	-	991	1213	942	1167	1720	1531	1652	37.9348	39.2487	34.2865	36.4587	52.8776	51.6322	52.3805
ENSMUSG00000026820	529.019	663.605	577.544	530.18	1043.23	896.872	766.122	-0.609185	1.33676e-06	3.29997e-05	Ptges2	2	32395896	32405772	+	5058	protein_coding	prostaglandin E synthase 2 [Source:MGI Symbol;Acc:MGI:1917592]	-	459	719	583	591	1091	855	757	14.9519	19.7977	18.0577	15.7123	28.5423	24.5376	20.4256
ENSMUSG00000113262	207.458	279.655	227.847	202.742	475.239	359.798	276.29	-0.608501	0.000347231	0.00400861	Gm48551	10	81384466	81391560	+	1970	protein_coding	predicted gene, 48551 [Source:MGI Symbol;Acc:MGI:6098103]	-	180	303	230	226	497	343	273	10.0717	14.3309	12.2368	10.3206	22.334	16.9086	12.6529
ENSMUSG00000029330	5790.4	5800.77	4575.77	5334.1	8157.48	8071.85	8725.9	-0.608221	2.19348e-10	1.1198e-08	Cds1	5	101765130	101823858	+	3939	protein_coding	CDP-diacylglycerol synthase 1 [Source:MGI Symbol;Acc:MGI:1921846]	-	5024	6285	4619	5946	8531	7695	8622	153.231	162.033	133.953	148.009	208.966	206.77	217.821
ENSMUSG00000086578	84.1359	77.5283	51.5133	81.6352	129.089	113.289	120.434	-0.607669	0.00122119	0.0112167	Gm13583	2	60550757	60553923	+	1808	antisense	predicted gene 13583 [Source:MGI Symbol;Acc:MGI:3650462]	-	73	84	52	91	135	108	119	6.15737	5.98897	4.17046	6.2644	9.14503	8.0256	8.31408
ENSMUSG00000006611	260.476	236.277	193.175	239.523	444.64	335.671	323.856	-0.607334	4.10824e-05	0.000661023	Hfe	13	23702034	23710854	-	3572	protein_coding	hemochromatosis [Source:MGI Symbol;Acc:MGI:109191]	-	226	256	195	267	465	320	320	8.35022	7.99521	6.85066	8.05132	13.7982	10.4165	9.79342
ENSMUSG00000036928	134.848	107.986	157.512	95.9887	200.805	223.431	177.109	-0.606302	0.000536461	0.0057648	Stag3	5	138280240	138312393	+	5733	protein_coding	stromal antigen 3 [Source:MGI Symbol;Acc:MGI:1355311]	-	117	117	159	107	210	213	175	3.4374	2.90556	4.4417	2.56563	4.95498	5.51321	4.2587
ENSMUSG00000097050	452.951	670.989	511.171	512.239	1048.01	857.011	659.857	-0.60622	8.77341e-05	0.00125183	Gm9918	15	102270563	102274121	+	2192	protein_coding	predicted gene 9918 [Source:MGI Symbol;Acc:MGI:3646315]	-	393	727	516	571	1096	817	652	12.1888	19.0591	15.2168	14.4534	27.2996	22.3239	16.7498
ENSMUSG00000024891	418.375	445.787	481.452	450.339	765.929	654.559	668.965	-0.60613	1.07051e-08	4.04436e-07	Slc29a2	19	5024006	5031971	+	2472	protein_coding	solute carrier family 29 (nucleoside transporters), member 2 [Source:MGI Symbol;Acc:MGI:1345278]	-	363	483	486	502	801	624	661	9.9831	11.2281	12.7088	11.2675	17.6917	15.1191	15.0576
ENSMUSG00000114995	284.679	346.108	279.361	325.644	426.472	506.654	519.182	-0.605758	1.50474e-06	3.63011e-05	Gm49284	15	31621972	31624035	+	2064	TEC	predicted gene, 49284 [Source:MGI Symbol;Acc:MGI:6118771]	-	247	375	282	363	446	483	513	8.1357	10.4407	8.83191	9.75822	11.7981	14.0161	13.9962
ENSMUSG00000027367	4097.3	4200.37	3376.11	4018.97	6187.67	6009.57	5935.68	-0.604566	1.93044e-11	1.19138e-09	Stard7	2	127270218	127298932	+	5567	protein_coding	START domain containing 7 [Source:MGI Symbol;Acc:MGI:2139090]	-	3555	4551	3408	4480	6471	5729	5865	172.878	187.071	157.582	177.805	252.726	245.448	236.245
ENSMUSG00000070407	1679.26	1533.03	1252.17	1547.48	2311.17	2304.59	2357.07	-0.604336	3.5201e-09	1.45495e-07	Hs3st3b1	11	63885792	63922290	-	4911	protein_coding	heparan sulfate (glucosamine) 3-O-sulfotransferase 3B1 [Source:MGI Symbol;Acc:MGI:1333853]	-	1457	1661	1264	1725	2417	2197	2329	20.1696	19.436	16.6377	19.4891	26.8716	26.7947	26.7056
ENSMUSG00000109021	54.1697	37.8412	30.7099	42.1633	62.154	58.7425	93.1086	-0.604241	0.00711788	0.043189	Gm44812	7	70574834	70585751	+	5349	lincRNA	predicted gene 44812 [Source:MGI Symbol;Acc:MGI:5753388]	-	47	41	31	47	65	56	92	0.963296	0.710307	0.604132	0.786187	1.06993	1.01119	1.56187
ENSMUSG00000020435	8382.47	9283.09	7478.35	9340.51	13240.7	12862.5	13749.7	-0.603788	5.56317e-11	3.10384e-09	Osbp2	11	3703731	3863903	-	6361	protein_coding	oxysterol binding protein 2 [Source:MGI Symbol;Acc:MGI:1921559]	-	7273	10058	7549	10412	13847	12262	13586	213.769	249.887	210.974	249.765	326.863	317.522	330.764
ENSMUSG00000078247	80.6783	119.061	93.1203	110.342	131.958	168.885	191.278	-0.601781	0.000820373	0.00811073	Airn	17	12741311	12860136	+	3597	antisense	antisense Igf2r RNA [Source:MGI Symbol;Acc:MGI:1353471]	-	70	129	94	123	138	161	189	5.971	9.30121	7.62403	8.56289	9.45382	12.0992	13.3538
ENSMUSG00000025473	53.0172	91.3726	99.0641	93.2974	110.921	164.689	145.735	-0.601719	0.00264512	0.0203621	Adam8	7	139978932	139992562	-	4638	protein_coding	a disintegrin and metallopeptidase domain 8 [Source:MGI Symbol;Acc:MGI:107825]	-	46	99	100	104	116	157	144	1.51149	2.74968	3.12432	2.78899	3.06114	4.54494	3.91926
ENSMUSG00000038570	122.17	137.52	148.596	127.387	220.886	209.795	202.41	-0.601579	2.80708e-05	0.00048086	Saxo2	7	82632960	82648528	-	4784	protein_coding	stabilizer of axonemal microtubules 2 [Source:MGI Symbol;Acc:MGI:1914618]	-	106	149	150	142	231	200	200	4.74412	5.63685	6.38335	5.18685	8.30311	7.88607	7.41438
ENSMUSG00000022827	208.611	239.045	224.876	187.492	358.581	349.308	301.591	-0.601357	6.61779e-06	0.000135368	Rabl3	16	37539885	37572385	+	6369	protein_coding	RAB, member RAS oncogene family-like 3 [Source:MGI Symbol;Acc:MGI:1914907]	-	181	259	227	209	375	333	298	5.48357	6.63262	6.53911	5.1677	9.1242	8.88812	7.47818
ENSMUSG00000007570	886.309	1139.85	1024.32	884.531	1648.52	1669.97	1274.17	-0.599646	1.33308e-06	3.29538e-05	Fance	17	28313519	28326572	+	3192	protein_coding	Fanconi anemia, complementation group E [Source:MGI Symbol;Acc:MGI:1920025]	-	769	1235	1034	986	1724	1592	1259	43.3138	58.7987	55.3769	45.3256	77.9859	78.9995	58.7382
ENSMUSG00000027115	74.9156	59.9921	66.373	68.1789	97.534	106.995	122.458	-0.599459	0.000965882	0.00926539	Kif18a	2	109280738	109341747	+	9832	protein_coding	kinesin family member 18A [Source:MGI Symbol;Acc:MGI:2446977]	-	65	65	67	76	102	102	121	1.53011	1.29337	1.49966	1.46012	1.92837	2.1154	2.35934
ENSMUSG00000116908	116.407	88.6037	96.0922	127.387	120.483	207.697	199.374	-0.599398	0.00185085	0.0153822	AC154232.2	16	36875140	36880234	+	5095	TEC	TEC	-	101	96	97	142	126	198	197	1.34767	1.08277	1.23067	1.54638	1.35025	2.32761	2.17733
ENSMUSG00000021009	1810.65	1626.25	1319.53	1691.91	2250.93	2416.83	2830.71	-0.599049	3.78227e-07	1.03745e-05	Ptpn21	12	98676741	98737405	-	7897	protein_coding	protein tyrosine phosphatase, non-receptor type 21 [Source:MGI Symbol;Acc:MGI:1344406]	-	1571	1762	1332	1886	2354	2304	2797	29.2211	27.703	23.5577	28.6304	35.1646	37.7558	43.0931
ENSMUSG00000100975	482.917	383.027	372.481	389.337	552.693	674.49	667.953	-0.59754	1.79242e-06	4.23901e-05	Gm28875	12	104925501	104926689	-	1189	lincRNA	predicted gene 28875 [Source:MGI Symbol;Acc:MGI:5579581]	-	419	415	376	434	578	643	660	23.9574	20.0574	20.4419	20.2526	26.5419	32.3905	31.2582
ENSMUSG00000111682	209.764	339.648	293.23	224.273	465.677	431.128	373.447	-0.596692	0.000179608	0.00230864	Gm47543	9	49954878	49956554	+	824	lincRNA	predicted gene, 47543 [Source:MGI Symbol;Acc:MGI:6096554]	-	182	368	296	250	487	411	369	15.0159	25.6642	23.2209	16.834	32.2692	29.8747	25.2175
ENSMUSG00000107171	64.5426	83.066	84.2045	52.0312	86.0594	115.387	155.856	-0.595193	0.00472141	0.0318192	Gm42572	5	73041777	73045154	-	3378	TEC	predicted gene 42572 [Source:MGI Symbol;Acc:MGI:5662709]	-	56	90	85	58	90	110	154	1.12703	1.53105	1.62658	0.952669	1.45469	1.95039	2.56722
ENSMUSG00000074037	35.729	37.8412	48.5414	49.34	69.8038	70.2812	74.8917	-0.594721	0.00405418	0.028111	Mc1r	8	123407107	123410744	+	3638	protein_coding	melanocortin 1 receptor [Source:MGI Symbol;Acc:MGI:99456]	-	31	41	49	55	73	67	74	0.579304	0.647633	0.87066	0.838829	1.09559	1.10306	1.14544
ENSMUSG00000020886	12696.5	12598.3	12551.4	13155.8	16521.5	20847.3	21233.8	-0.594526	3.7055e-10	1.83958e-08	Dlg4	11	70016942	70047522	+	13251	protein_coding	discs large MAGUK scaffold protein 4 [Source:MGI Symbol;Acc:MGI:1277959]	-	11016	13650	12670	14665	17278	19874	20981	407.683	427.003	445.844	442.942	513.536	647.985	643.161
ENSMUSG00000117075	57.6273	63.6839	54.4853	59.208	103.271	109.093	75.9038	-0.593154	0.00218299	0.0175389	AC154569.1	17	71755149	71756762	-	1614	TEC	novel transcript	-	50	69	55	66	108	104	75	2.10608	2.45671	2.2028	2.26889	3.65348	3.85939	2.61674
ENSMUSG00000070167	42.6442	41.533	37.6444	40.3691	51.6357	67.1343	87.0363	-0.591895	0.0063484	0.0397376	Snora57	19	8888538	8888685	-	148	snoRNA	small nucleolar RNA, H/ACA box 57 [Source:MGI Symbol;Acc:MGI:5455599]	-	37	45	38	45	54	64	86	16.996	17.4726	16.5973	16.8704	19.9213	25.9004	32.7219
ENSMUSG00000025384	737.63	717.136	640.945	710.496	1057.57	1001.77	1157.79	-0.590946	1.02134e-09	4.62452e-08	Faap100	11	120369055	120378764	-	5212	protein_coding	Fanconi anemia core complex associated protein 100 [Source:MGI Symbol;Acc:MGI:1919135]	-	640	777	647	792	1106	955	1144	24.4712	25.1129	23.5227	24.7154	33.9633	32.1707	36.2324
ENSMUSG00000053773	1104.14	1291.21	1231.37	1229.91	1797.69	1908.08	1845.98	-0.590546	3.90902e-12	2.75174e-10	Rdh8	9	20818503	20826117	+	1405	protein_coding	retinol dehydrogenase 8 [Source:MGI Symbol;Acc:MGI:2685028]	-	958	1399	1243	1371	1880	1819	1824	46.355	57.2202	57.1887	54.142	73.058	77.5434	73.1056
ENSMUSG00000057706	399.934	349.8	335.827	383.058	604.328	511.899	574.845	-0.589222	2.3654e-07	6.90874e-06	Mex3b	7	82867333	82871515	+	3355	protein_coding	mex3 RNA binding family member B [Source:MGI Symbol;Acc:MGI:1918252]	-	347	379	339	427	632	488	568	7.03144	6.49164	6.53164	7.06169	10.2852	8.71196	9.53363
ENSMUSG00000018076	4278.25	3460.16	2719.31	3658.34	5180.78	5221.79	5960.98	-0.589039	3.53362e-06	7.85196e-05	Med13l	5	118560679	118765438	+	15427	protein_coding	mediator complex subunit 13-like [Source:MGI Symbol;Acc:MGI:2670178]	-	3712	3749	2745	4078	5418	4978	5890	49.7255	42.4509	34.964	44.5846	58.2894	58.7499	65.3554
ENSMUSG00000097944	115.255	157.825	161.475	161.476	241.923	282.174	187.229	-0.588282	0.000480607	0.00526506	A130014A01Rik	8	120101582	120103904	+	2323	bidirectional_promoter_lncRNA	RIKEN cDNA A130014A01 gene [Source:MGI Symbol;Acc:MGI:3028043]	-	100	171	163	180	253	269	185	2.92657	4.23014	4.5358	4.29929	5.94645	6.93572	4.48461
ENSMUSG00000047747	2559.81	2120.95	1969.39	2364.73	3211.93	3455.32	3669.69	-0.588228	1.03697e-08	3.94246e-07	Rnf150	8	82863356	83091268	+	17242	protein_coding	ring finger protein 150 [Source:MGI Symbol;Acc:MGI:2443860]	-	2221	2298	1988	2636	3359	3294	3626	23.8875	20.8916	20.3304	23.1384	29.0142	31.2123	32.3031
ENSMUSG00000037788	5863.01	6584.36	5267.24	5982.7	9811.73	8689.69	8590.28	-0.58808	3.29649e-10	1.65476e-08	Vopp1	6	57727807	57825159	-	9821	protein_coding	vesicular, overexpressed in cancer, prosurvival protein 1 [Source:MGI Symbol;Acc:MGI:2141658]	-	5087	7134	5317	6669	10261	8284	8488	173.091	205.185	172.023	185.199	280.402	248.332	239.228
ENSMUSG00000032192	6530.33	6486.53	5606.04	6466.23	10249.7	9576.07	8791.68	-0.587322	2.56188e-11	1.52873e-09	Gnb5	9	75306288	75345876	+	3115	protein_coding	guanine nucleotide binding protein (G protein), beta 5 [Source:MGI Symbol;Acc:MGI:101848]	-	5666	7028	5659	7208	10719	9129	8687	364.771	382.451	346.411	378.725	554.213	517.783	463.242
ENSMUSG00000030055	86.441	68.2987	89.1577	80.7381	112.833	134.269	140.675	-0.587123	0.000791119	0.0078902	Rab43	6	87788853	87812164	-	5526	protein_coding	RAB43, member RAS oncogene family [Source:MGI Symbol;Acc:MGI:1917084]	-	75	74	90	90	118	128	139	2.66395	2.22176	3.0396	2.609	3.3661	4.0055	4.08955
ENSMUSG00000019813	115.255	120.907	113.924	89.709	177.856	177.276	162.94	-0.586791	0.000219846	0.00273607	Cep57l1	10	41718840	41809871	-	5851	protein_coding	centrosomal protein 57-like 1 [Source:MGI Symbol;Acc:MGI:1915511]	-	100	131	115	100	186	169	161	4.48148	4.96242	4.90036	3.65753	6.69443	6.67252	5.97644
ENSMUSG00000037957	884.003	1096.47	1001.54	985.005	1578.71	1447.58	1507.96	-0.586199	7.571e-10	3.51642e-08	Wdr20	12	110737944	110804238	+	5593	protein_coding	WD repeat domain 20 [Source:MGI Symbol;Acc:MGI:1916891]	-	767	1188	1011	1098	1651	1380	1490	43.0941	56.4208	54.0109	50.349	74.4986	68.3097	69.3431
ENSMUSG00000079737	54.1697	70.1446	58.4478	69.9731	86.0594	92.3096	132.579	-0.585406	0.00327463	0.0240473	3110001I22Rik	16	13671929	13678388	+	1705	protein_coding	RIKEN cDNA 3110001I22 gene [Source:MGI Symbol;Acc:MGI:1913848]	-	47	76	59	78	90	88	131	2.25335	3.07996	2.68962	3.05205	3.46539	3.71702	5.20232
ENSMUSG00000086477	71.4579	73.8364	96.0922	86.1207	138.651	161.542	98.1689	-0.585286	0.00223569	0.0178826	Gm15506	7	98682336	98702928	-	4791	processed_transcript	predicted gene 15506 [Source:MGI Symbol;Acc:MGI:3782954]	-	62	80	97	96	145	154	97	1.75772	1.91712	2.6148	2.22124	3.30145	3.84645	2.27785
ENSMUSG00000057286	534.782	663.605	562.684	554.402	847.207	928.341	878.46	-0.58499	2.54062e-08	9.04831e-07	St6galnac2	11	116675303	116694868	-	5790	protein_coding	ST6 (alpha-N-acetyl-neuraminyl-2,3-beta-galactosyl-1,3)-N-acetylgalactosaminide alpha-2,6-sialyltransferase 2 [Source:MGI Symbol;Acc:MGI:107553]	-	464	719	568	618	886	885	868	18.7542	24.5647	21.8292	20.3862	28.7603	31.5142	29.06
ENSMUSG00000044724	2079.19	1933.59	1648.43	1994.23	2882.03	2843.77	3004.78	-0.584869	4.28125e-10	2.09653e-08	Gpr152	19	4139799	4145738	+	3922	protein_coding	G protein-coupled receptor 152 [Source:MGI Symbol;Acc:MGI:2685519]	-	1804	2095	1664	2223	3014	2711	2969	31.2706	30.6962	27.4259	31.4489	41.9587	41.401	42.629
ENSMUSG00000030528	195.933	130.137	176.334	180.315	267.74	241.264	290.458	-0.584371	0.000146965	0.00194883	Blm	7	80454733	80535119	-	8777	protein_coding	Bloom syndrome, RecQ like helicase [Source:MGI Symbol;Acc:MGI:1328362]	-	170	141	178	201	280	230	287	6.06046	4.2489	6.03371	5.84815	8.01666	7.2238	8.47488
ENSMUSG00000026672	2997.77	2863.93	2374.57	2860.82	3989.33	4236.8	4423.67	-0.583376	9.2144e-10	4.23604e-08	Optn	2	5020642	5064051	-	3753	protein_coding	optineurin [Source:MGI Symbol;Acc:MGI:1918898]	-	2601	3103	2397	3189	4172	4039	4371	95.945	96.753	84.0733	96.0069	123.596	131.261	133.554
ENSMUSG00000021983	4108.83	3036.52	2543.97	3216.97	4258.03	4918.63	5832.45	-0.583291	3.56908e-05	0.000587919	Atp8a2	14	59638540	60197179	-	15410	protein_coding	ATPase, aminophospholipid transporter-like, class I, type 8A, member 2 [Source:MGI Symbol;Acc:MGI:1354710]	-	3565	3290	2568	3586	4453	4689	5763	84.3296	65.7835	57.7595	69.2304	84.5965	97.7197	112.918
ENSMUSG00000075224	48.407	43.3789	31.7005	54.7225	66.9351	78.673	76.9158	-0.583011	0.00591722	0.0377868	Lrrc55	2	85162334	85196699	-	4080	protein_coding	leucine rich repeat containing 55 [Source:MGI Symbol;Acc:MGI:2685197]	-	42	47	32	61	70	75	76	1.11624	1.05586	0.808658	1.32313	1.49411	1.7561	1.67307
ENSMUSG00000039632	36.8815	44.3019	36.6537	43.9574	69.8038	83.9178	50.6025	-0.582142	0.0074745	0.0446737	Ccdc151	9	21989871	22002634	-	2514	protein_coding	coiled-coil domain containing 151 [Source:MGI Symbol;Acc:MGI:1924859]	-	32	48	37	49	73	80	50	1.25461	1.59074	1.37933	1.56791	2.29858	2.76331	1.62377
ENSMUSG00000018427	2806.45	2657.19	2406.27	2405.1	4032.36	3685.04	3945.98	-0.581736	1.43261e-11	9.05864e-10	Ypel2	11	86936425	86993707	-	4847	protein_coding	yippee like 2 [Source:MGI Symbol;Acc:MGI:1925114]	-	2435	2879	2429	2681	4217	3513	3899	34.1534	34.1332	32.3944	30.69	47.5026	43.4104	45.2984
ENSMUSG00000102834	227.052	147.673	179.306	213.508	249.572	296.859	359.278	-0.581717	0.000446136	0.0049324	1700029B24Rik	3	10241812	10242308	+	497	TEC	RIKEN cDNA 1700029B24 gene [Source:MGI Symbol;Acc:MGI:1919533]	-	197	160	181	238	261	283	355	26.9474	18.5	23.5417	26.5702	28.6728	34.105	40.223
ENSMUSG00000106928	71.4579	65.5298	60.4291	63.6934	95.6216	97.5545	119.422	-0.580333	0.00153106	0.0133356	Gm43860	5	35551260	35553964	-	2705	TEC	predicted gene 43860 [Source:MGI Symbol;Acc:MGI:5663997]	-	62	71	61	71	100	93	118	1.55823	1.50834	1.45773	1.45635	2.01846	2.05923	2.4565
ENSMUSG00000097021	89.8987	59.9921	51.5133	56.5167	85.1032	114.338	116.386	-0.579154	0.00473695	0.0318882	4933433G15Rik	9	75410184	75417709	+	1815	lincRNA	RIKEN cDNA 4933433G15 gene [Source:MGI Symbol;Acc:MGI:1918524]	-	78	65	52	63	89	109	115	4.02639	2.83619	2.55231	2.65417	3.6897	4.95712	4.91716
ENSMUSG00000042050	696.138	829.737	722.177	756.247	1100.6	1226.25	1093.01	-0.578816	3.63387e-09	1.49511e-07	Wdr60	12	116206262	116263022	-	8110	protein_coding	WD repeat domain 60 [Source:MGI Symbol;Acc:MGI:2445085]	-	604	899	729	843	1151	1169	1080	23.6671	29.7761	27.1609	26.9589	36.2211	40.3556	35.0531
ENSMUSG00000021733	4039.68	3667.82	3179.96	3726.51	4739.96	5906.77	5980.21	-0.574555	1.03459e-07	3.30573e-06	Slc4a7	14	14702279	14799940	+	15205	protein_coding	solute carrier family 4, sodium bicarbonate cotransporter, member 7 [Source:MGI Symbol;Acc:MGI:2443878]	-	3505	3974	3210	4154	4957	5631	5909	67.4835	64.6752	58.7655	65.2743	76.6492	95.5161	94.2364
ENSMUSG00000042564	432.205	473.476	424.985	447.648	567.992	730.085	733.737	-0.573741	1.09354e-06	2.75233e-05	Fam227a	15	79609576	79658956	-	9222	protein_coding	family with sequence similarity 227, member A [Source:MGI Symbol;Acc:MGI:1922979]	-	375	513	429	499	594	696	725	13.5391	15.6558	14.7273	14.7036	17.2235	22.1385	21.6815
ENSMUSG00000086264	208.611	182.745	222.894	199.154	254.353	347.21	339.037	-0.572785	7.4176e-05	0.0010921	Gm15850	1	136126178	136131183	-	2049	processed_transcript	predicted gene 15850 [Source:MGI Symbol;Acc:MGI:3801986]	-	181	198	225	222	266	331	335	15.3814	14.2227	18.1806	15.397	18.1542	24.7814	23.5807
ENSMUSG00000019952	252.408	229.816	208.035	190.183	363.362	335.671	310.699	-0.572279	2.14112e-05	0.000379029	Poc1b	10	99107036	99198074	+	4190	protein_coding	POC1 centriolar protein B [Source:MGI Symbol;Acc:MGI:1918511]	-	219	249	210	212	380	320	307	9.49523	9.12559	8.65742	7.50176	13.232	12.2234	11.0254
ENSMUSG00000095930	1489.09	1695.47	1420.58	1608.48	2362.81	2251.1	2380.34	-0.568428	8.87517e-11	4.78861e-09	Nim1k	13	119710094	119755882	-	8466	protein_coding	NIM1 serine/threonine protein kinase [Source:MGI Symbol;Acc:MGI:2442399]	-	1292	1837	1434	1793	2471	2146	2352	18.6685	22.4366	19.7018	21.1443	28.6747	27.3186	28.1501
ENSMUSG00000025645	190.17	248.275	237.754	233.244	408.304	351.406	290.458	-0.568227	9.87031e-05	0.00138963	Ccdc51	9	109082493	109092489	+	1526	protein_coding	coiled-coil domain containing 51 [Source:MGI Symbol;Acc:MGI:1913908]	-	165	269	240	260	427	335	287	7.35084	10.1299	10.1665	9.45349	15.2778	13.1486	10.5908
ENSMUSG00000097328	542.85	698.677	632.029	563.373	958.128	970.3	836.966	-0.566945	6.20108e-07	1.62427e-05	Tnfsf12	11	69686250	69695849	-	1515	protein_coding	tumor necrosis factor (ligand) superfamily, member 12 [Source:MGI Symbol;Acc:MGI:1196259]	-	471	757	638	628	1002	925	827	36.2633	49.2655	46.7063	39.4614	61.9574	62.7436	52.7409
ENSMUSG00000025450	125.628	116.292	150.577	173.138	226.623	261.194	177.109	-0.565715	0.00107566	0.0101172	Gm9752	13	119473804	119476761	-	2659	processed_transcript	predicted gene 9752 [Source:MGI Symbol;Acc:MGI:3641896]	-	109	126	152	193	237	249	175	2.78686	2.72308	3.69522	4.02729	4.8665	5.60879	3.70614
ENSMUSG00000029049	142.916	180.899	178.315	175.83	248.616	259.096	270.217	-0.564651	3.80616e-05	0.000619609	Morn1	4	155086577	155145505	+	4320	protein_coding	MORN repeat containing 1 [Source:MGI Symbol;Acc:MGI:1924116]	-	124	196	180	196	260	247	267	7.32409	9.78563	10.1091	9.44831	12.3334	12.8532	13.0629
ENSMUSG00000057914	2837.57	2733.79	2374.57	2540.56	3870.76	4047.99	3815.43	-0.561891	3.64704e-11	2.09979e-09	Cacnb2	2	14603088	14987908	+	13228	protein_coding	calcium channel, voltage-dependent, beta 2 subunit [Source:MGI Symbol;Acc:MGI:894644]	-	2462	2962	2397	2832	4048	3859	3770	81.9671	83.3561	75.8801	76.9504	108.236	113.19	103.965
ENSMUSG00000079550	6160.36	7317.19	6613.52	6367.55	9543.99	10947.1	9183.35	-0.561762	1.17287e-09	5.21882e-08	Mpp4	1	59120935	59163389	-	7063	protein_coding	membrane protein, palmitoylated 4 (MAGUK p55 subfamily member 4) [Source:MGI Symbol;Acc:MGI:2386681]	-	5345	7928	6676	7098	9981	10436	9074	150.903	189.197	179.215	163.551	226.31	259.577	212.2
ENSMUSG00000048503	3176.42	3719.51	2970.93	3260.92	5140.62	4888.21	4689.84	-0.561539	9.38905e-10	4.30535e-08	Tmem136	9	43108650	43116570	-	3578	protein_coding	transmembrane protein 136 [Source:MGI Symbol;Acc:MGI:2685030]	-	2756	4030	2999	3635	5376	4660	4634	101.442	125.385	104.96	109.197	158.92	151.115	141.284
ENSMUSG00000021671	794.105	747.594	742.981	803.793	1159.89	1130.79	1161.83	-0.560763	2.84045e-11	1.67689e-09	Poc5	13	96388294	96417737	+	6251	protein_coding	POC5 centriolar protein [Source:MGI Symbol;Acc:MGI:1914713]	-	689	810	750	896	1213	1078	1148	27.2015	27.0309	28.1542	28.8701	38.4604	37.4951	37.5415
ENSMUSG00000074171	58.7799	59.0691	75.2887	60.1051	138.651	96.5055	72.8676	-0.560347	0.00743477	0.0445424	Gm6658	8	90906532	90908416	-	1885	TEC	predicted gene 6658 [Source:MGI Symbol;Acc:MGI:3645470]	-	51	64	76	67	145	92	72	2.93581	3.11414	4.15986	3.14774	6.70354	4.6658	3.43309
ENSMUSG00000039375	3773.44	3510.92	2639.07	3119.18	4822.2	5051.85	4824.44	-0.559317	6.4183e-07	1.67629e-05	Wdr17	8	54629055	54887184	-	6571	protein_coding	WD repeat domain 17 [Source:MGI Symbol;Acc:MGI:1924662]	-	3274	3804	2664	3477	5043	4816	4767	116.412	114.33	90.0662	100.9	144.008	150.865	140.398
ENSMUSG00000057132	15248.2	15402.3	14342.5	15890.2	18509.5	25569.8	24412.7	-0.55923	1.89296e-07	5.71407e-06	Rpgrip1	14	52110704	52163546	+	12152	protein_coding	retinitis pigmentosa GTPase regulator interacting protein 1 [Source:MGI Symbol;Acc:MGI:1932134]	-	13230	16688	14478	17713	19357	24376	24122	419.315	447.08	436.311	458.182	492.716	680.65	633.269
ENSMUSG00000055150	163.662	182.745	175.343	197.36	288.777	268.537	261.109	-0.558698	2.24603e-05	0.000395656	Zfp78	7	6363280	6382605	+	5018	protein_coding	zinc finger protein 78 [Source:MGI Symbol;Acc:MGI:107783]	zf-C2H2	142	198	177	220	302	256	258	3.90998	4.60842	4.63412	4.94396	6.6784	6.21023	5.88438
ENSMUSG00000039470	2026.18	1867.14	1604.84	1907.21	2607.6	2954.96	2734.56	-0.55864	8.5302e-09	3.28467e-07	Zdhhc2	8	40423815	40510268	+	5528	protein_coding	zinc finger, DHHC domain containing 2 [Source:MGI Symbol;Acc:MGI:1923452]	-	1758	2023	1620	2126	2727	2817	2702	71.2253	69.2806	62.4077	70.2983	88.7318	100.55	90.6767
ENSMUSG00000000579	53.0172	74.7594	95.1015	52.0312	110.921	101.75	119.422	-0.55835	0.00626424	0.0393228	Dynlt1c	17	6601671	6609774	+	3777	protein_coding	dynein light chain Tctex-type 1C [Source:MGI Symbol;Acc:MGI:3807476]	-	46	81	96	58	116	97	118	1.78599	2.65832	3.54405	1.83787	3.61708	3.31798	3.79488
ENSMUSG00000030380	206.306	179.976	183.269	200.948	269.653	313.643	290.458	-0.557643	1.78881e-05	0.000322684	Mzf1	7	13042303	13054764	-	8278	protein_coding	myeloid zinc finger 1 [Source:MGI Symbol;Acc:MGI:107457]	zf-C2H2	179	195	185	224	282	299	287	4.1876	3.85609	4.1152	4.27687	5.29834	6.1626	5.56146
ENSMUSG00000003500	10178.1	11167.8	8736.46	9864.41	16066.3	14331.1	14286.1	-0.557049	4.70085e-09	1.89942e-07	Impdh1	6	29200434	29216364	-	3294	protein_coding	inosine monophosphate dehydrogenase 1 [Source:MGI Symbol;Acc:MGI:96567]	-	8831	12100	8819	10996	16802	13662	14116	373.595	432.691	354.747	379.658	570.862	509.198	494.65
ENSMUSG00000027276	2309.7	1809.92	1397.79	2162.89	2456.52	2822.79	3530.03	-0.556641	0.000240485	0.00294015	Jag1	2	137081456	137116644	-	5827	protein_coding	jagged 1 [Source:MGI Symbol;Acc:MGI:1095416]	-	2004	1961	1411	2411	2569	2691	3488	38.5186	31.8603	25.7874	37.8212	39.6566	45.5688	55.5321
ENSMUSG00000035403	2170.25	1980.66	1623.66	2110.85	2726.17	3018.94	3109.02	-0.556474	2.48533e-07	7.1891e-06	Crb2	2	37776249	37799103	+	6698	protein_coding	crumbs family member 2 [Source:MGI Symbol;Acc:MGI:2679260]	-	1883	2146	1639	2353	2851	2878	3072	47.9813	46.2223	39.7108	48.9339	58.3442	64.6091	64.8392
ENSMUSG00000007646	117.56	138.443	168.409	154.3	184.55	232.872	253.013	-0.556308	0.000625695	0.00654419	Rad51c	11	87376645	87404954	-	4384	protein_coding	RAD51 paralog C [Source:MGI Symbol;Acc:MGI:2150020]	-	102	150	170	172	193	222	250	3.23583	4.02232	5.12793	4.45328	4.91724	6.20468	6.56932
ENSMUSG00000020593	839.054	724.52	609.244	749.968	1064.27	1123.45	1092	-0.554625	6.02263e-07	1.57982e-05	Lpin1	12	16535669	16610966	-	9665	protein_coding	lipin 1 [Source:MGI Symbol;Acc:MGI:1891340]	-	728	785	615	836	1113	1071	1079	14.8403	13.5264	11.9205	13.9086	18.2216	19.2346	18.2191
ENSMUSG00000032121	336.544	402.409	377.434	334.615	559.386	529.731	540.435	-0.554369	5.81577e-07	1.5345e-05	Tmem218	9	37208223	37224700	+	2619	protein_coding	transmembrane protein 218 [Source:MGI Symbol;Acc:MGI:1913529]	-	292	436	381	373	585	505	534	7.57975	9.56663	9.40383	7.90218	12.1957	11.549	11.4818
ENSMUSG00000000167	43.7968	53.5314	64.3917	69.9731	73.6286	113.289	94.1207	-0.553934	0.00740105	0.0444581	Pih1d2	9	50617321	50625000	+	2813	protein_coding	PIH1 domain containing 2 [Source:MGI Symbol;Acc:MGI:1919864]	-	38	58	65	78	77	108	93	2.53523	3.27086	4.12339	4.24711	4.12575	6.34802	5.13938
ENSMUSG00000071654	435.663	770.668	661.748	523.901	1151.28	889.529	734.749	-0.553713	0.00113879	0.0106002	Uqcc3	19	8880016	8880933	-	829	protein_coding	ubiquinol-cytochrome c reductase complex assembly factor 3 [Source:MGI Symbol;Acc:MGI:2147553]	-	378	835	668	584	1204	848	726	30.9988	57.8815	52.0879	39.087	79.2973	61.2675	49.3156
ENSMUSG00000114882	127.933	178.13	156.521	115.725	244.791	228.676	195.326	-0.55343	0.000855667	0.00837132	Gm48581	13	47152357	47155008	-	2652	TEC	predicted gene, 48581 [Source:MGI Symbol;Acc:MGI:6098148]	-	111	193	158	129	256	218	193	2.84549	4.18207	3.85123	2.69892	5.27051	4.92347	4.09813
ENSMUSG00000038593	428.747	467.938	432.91	530.18	602.416	713.302	782.315	-0.553043	6.4096e-06	0.00013216	Tctn1	5	122237848	122264460	-	8295	protein_coding	tectonic family member 1 [Source:MGI Symbol;Acc:MGI:3603820]	-	372	507	437	591	630	680	773	10.5419	12.1447	11.7752	13.6688	14.3383	16.9772	18.1448
ENSMUSG00000110424	114.102	105.217	100.055	113.033	132.914	174.13	193.302	-0.552877	0.000955637	0.00918482	1700012D14Rik	7	111083064	111122684	-	4153	processed_transcript	RIKEN cDNA 1700012D14 gene [Source:MGI Symbol;Acc:MGI:1922729]	-	99	114	101	126	139	166	191	5.16533	5.02769	5.01063	5.36537	5.82447	7.63049	8.25451
ENSMUSG00000045467	49.5595	58.1462	59.4385	75.3556	121.439	91.2607	78.9399	-0.55274	0.00659213	0.040887	Ttll13	7	80246376	80260821	+	4321	protein_coding	tubulin tyrosine ligase-like family, member 13 [Source:MGI Symbol;Acc:MGI:1920845]	-	43	63	60	84	127	87	78	1.52177	1.88461	2.01901	2.42619	3.60963	2.71257	2.28649
ENSMUSG00000025584	1061.5	988.485	921.296	894.399	1378.86	1424.51	1500.87	-0.552717	2.10507e-09	9.03223e-08	Pde8a	7	81213596	81334533	+	4045	protein_coding	phosphodiesterase 8A [Source:MGI Symbol;Acc:MGI:1277116]	-	921	1071	930	997	1442	1358	1483	35.82	35.2092	34.392	31.6466	45.0412	46.5315	47.7752
ENSMUSG00000029804	7345.18	7618.07	5931.96	6769.44	10479.2	10141.5	10213.6	-0.552662	3.72482e-09	1.52904e-07	Herc3	6	58831465	58920398	+	9127	protein_coding	hect domain and RLD 3 [Source:MGI Symbol;Acc:MGI:1921248]	-	6373	8254	5988	7546	10959	9668	10092	336.907	368.834	300.993	325.574	465.282	450.282	441.915
ENSMUSG00000026870	58.7799	71.9905	55.4759	64.5905	136.739	76.575	89.0604	-0.552365	0.0077198	0.0457175	Cutal	2	34874396	34892132	+	2441	protein_coding	cutA divalent cation tolerance homolog-like [Source:MGI Symbol;Acc:MGI:1925246]	-	51	78	56	72	143	73	88	2.50158	3.23399	2.6118	2.88232	5.63325	3.15463	3.57538
ENSMUSG00000028496	545.155	467.015	391.303	487.12	689.432	682.881	751.953	-0.552104	4.01456e-06	8.79058e-05	Mllt3	4	87769925	88033364	-	12004	protein_coding	myeloid/lymphoid or mixed-lineage leukemia; translocated to, 3 [Source:MGI Symbol;Acc:MGI:1917372]	-	473	506	395	543	721	651	743	13.393	12.1106	10.6346	12.5482	16.3957	16.2397	17.4261
ENSMUSG00000038658	2661.23	1944.67	1904.01	2316.29	2931.76	3336.78	3665.65	-0.551486	7.87067e-06	0.000157073	Ric1	19	29522282	29606829	+	10727	protein_coding	RAB6A GEF complex partner 1 [Source:MGI Symbol;Acc:MGI:1924893]	-	2309	2107	1922	2582	3066	3181	3622	48.5992	37.4861	38.465	44.3534	51.827	58.9861	63.1464
ENSMUSG00000108465	99.119	97.8333	88.1671	120.21	112.833	175.178	189.253	-0.550017	0.0033695	0.0244945	Gm45110	7	127455469	127456870	+	1402	TEC	predicted gene 45110 [Source:MGI Symbol;Acc:MGI:5753686]	-	86	106	89	134	118	167	187	4.17021	4.34476	4.10353	5.30311	4.59537	7.13439	7.51097
ENSMUSG00000109390	66.8477	60.9151	48.5414	78.944	85.1032	100.701	118.41	-0.549391	0.00583725	0.0374523	Gm45718	7	80910373	80914166	-	3794	TEC	predicted gene 45718 [Source:MGI Symbol;Acc:MGI:5804833]	-	58	66	49	88	89	96	117	1.03929	0.999665	0.834861	1.28694	1.28079	1.51552	1.73656
ENSMUSG00000045103	3524.49	2980.22	2973.9	3356.02	3855.46	5002.55	5536.93	-0.548887	4.06952e-06	8.9001e-05	Dmd	X	82948870	85206141	+	23801	protein_coding	dystrophin, muscular dystrophy [Source:MGI Symbol;Acc:MGI:94909]	-	3058	3229	3002	3741	4032	4769	5471	71.9859	64.2508	67.1937	71.8727	76.2271	98.9051	106.677
ENSMUSG00000075600	278.916	310.113	320.968	304.114	476.195	459.45	423.037	-0.548336	1.06983e-06	2.7002e-05	Zc3h3	15	75754430	75841915	-	3509	protein_coding	zinc finger CCCH type containing 3 [Source:MGI Symbol;Acc:MGI:2663721]	-	242	336	324	339	498	438	418	10.4062	12.2128	13.2473	11.8971	17.1982	16.5932	14.8884
ENSMUSG00000039137	2394.99	2561.2	2187.34	2478.66	3298.94	3786.79	3588.73	-0.548216	3.90439e-10	1.93299e-08	Whrn	4	63414910	63495991	-	7337	protein_coding	whirlin [Source:MGI Symbol;Acc:MGI:2682003]	-	2078	2775	2208	2763	3450	3610	3546	62.1518	70.1571	62.7935	67.4458	82.8717	95.1254	87.85
ENSMUSG00000025437	3152.22	2935.92	2480.57	2926.31	3996.03	4291.35	4478.32	-0.546988	9.9611e-09	3.80316e-07	Usp33	3	152346478	152393617	+	9675	protein_coding	ubiquitin specific peptidase 33 [Source:MGI Symbol;Acc:MGI:2159711]	-	2735	3181	2504	3262	4179	4091	4425	89.9548	88.4364	78.3085	87.5623	110.387	118.543	120.552
ENSMUSG00000075330	395.324	594.383	558.722	435.089	976.296	776.24	539.423	-0.54698	0.00145036	0.0127685	A930003A15Rik	16	19876567	19884274	-	1126	lincRNA	RIKEN cDNA A930003A15 gene [Source:MGI Symbol;Acc:MGI:1915412]	-	343	644	564	485	1021	740	533	23.1106	36.6777	36.1329	26.6701	55.2486	43.9268	29.7467
ENSMUSG00000107086	65.6952	71.9905	77.27	69.076	92.7529	130.073	109.301	-0.546588	0.00287924	0.0218104	Gm43808	5	30868764	30870828	-	2065	TEC	predicted gene 43808 [Source:MGI Symbol;Acc:MGI:5663945]	-	57	78	78	77	97	124	108	1.87656	2.17061	2.44169	2.06892	2.56471	3.59658	2.94514
ENSMUSG00000044982	315.798	311.959	321.958	300.525	503.926	463.646	427.085	-0.546352	1.00552e-06	2.54502e-05	Sft2d3	18	31909094	31911903	-	2810	protein_coding	SFT2 domain containing 3 [Source:MGI Symbol;Acc:MGI:1914408]	-	274	338	325	335	527	442	422	6.62906	6.91223	7.4764	6.61473	10.2398	9.42116	8.45685
ENSMUSG00000060149	141.763	130.137	129.774	149.814	226.623	182.521	216.579	-0.546306	0.000215791	0.00269491	BC002059	17	16951539	16974157	+	2091	lincRNA	cDNA sequence BC002059 [Source:MGI Symbol;Acc:MGI:2384864]	-	123	141	131	167	237	174	214	5.67303	5.49705	5.74499	6.28626	8.77884	7.07034	8.17558
ENSMUSG00000022555	447.188	446.71	468.573	400.999	618.672	701.763	642.652	-0.546208	1.96758e-07	5.88023e-06	Dgat1	15	76502015	76511953	-	3056	protein_coding	diacylglycerol O-acyltransferase 1 [Source:MGI Symbol;Acc:MGI:1333825]	-	388	484	473	447	647	669	635	31.7423	33.4697	36.7939	29.8456	42.5099	48.2185	43.0304
ENSMUSG00000030064	3472.62	2905.46	2370.6	2849.16	4109.82	4415.13	4425.7	-0.545982	1.63173e-06	3.89991e-05	Frmd4b	6	97286867	97617541	-	14302	protein_coding	FERM domain containing 4B [Source:MGI Symbol;Acc:MGI:2141794]	-	3013	3148	2393	3176	4298	4209	4373	86.138	76.073	65.0498	74.1041	98.6827	106.012	103.555
ENSMUSG00000090035	1081.09	1200.77	1031.26	1117.77	1688.68	1654.23	1562.61	-0.545421	3.93961e-10	1.94509e-08	Galnt4	10	99108159	99113247	+	5089	protein_coding	polypeptide N-acetylgalactosaminyltransferase 4 [Source:MGI Symbol;Acc:MGI:894692]	-	938	1301	1041	1246	1766	1577	1544	12.5308	14.691	13.2231	13.585	18.9472	18.5604	17.0851
ENSMUSG00000113780	161.357	188.283	208.035	166.859	278.259	327.28	221.639	-0.545054	0.000493209	0.00538187	Gm33195	13	43864669	43868589	+	2337	lincRNA	predicted gene, 33195 [Source:MGI Symbol;Acc:MGI:5592354]	-	140	204	210	186	291	312	219	4.07265	5.01625	5.80866	4.41599	6.79862	7.99621	5.27701
ENSMUSG00000048617	4504.15	5557.11	4705.55	4446.88	8225.37	7394.21	5853.7	-0.544038	4.84529e-06	0.000103334	Rtbdn	8	84946991	84956603	+	3393	protein_coding	retbindin [Source:MGI Symbol;Acc:MGI:2443686]	-	3908	6021	4750	4957	8602	7049	5784	155.917	203.052	180.194	161.407	275.623	247.769	191.144
ENSMUSG00000039789	577.426	513.163	484.424	514.93	709.512	797.22	813.689	-0.543437	1.91065e-07	5.73864e-06	Zfp597	16	3858321	3884561	-	6660	protein_coding	zinc finger protein 597 [Source:MGI Symbol;Acc:MGI:1918313]	zf-C2H2	501	556	489	574	742	760	804	16.7618	15.7239	15.5561	15.6733	19.9373	22.4016	22.281
ENSMUSG00000041775	440.273	503.934	464.611	541.843	695.169	805.611	675.038	-0.542589	1.61864e-06	3.87885e-05	Mapk1ip1	7	138835823	138846273	-	1883	protein_coding	mitogen-activated protein kinase 1 interacting protein 1 [Source:MGI Symbol;Acc:MGI:1916796]	-	382	546	469	604	727	768	667	16.4575	19.8835	19.2124	21.2375	25.1544	29.1503	23.8024
ENSMUSG00000029638	239.73	222.432	180.297	279.892	329.894	375.532	339.037	-0.542065	0.00022979	0.00284022	Glcci1	6	8509600	8597548	+	7756	protein_coding	glucocorticoid induced transcript 1 [Source:MGI Symbol;Acc:MGI:2179717]	-	208	241	182	312	345	358	335	6.26249	6.1334	5.2103	7.66662	8.34222	9.49615	8.35455
ENSMUSG00000020669	246.645	254.736	252.613	263.745	410.217	396.512	330.941	-0.541672	1.03803e-05	0.000200712	Sh3yl1	12	30911668	30960162	+	2555	protein_coding	Sh3 domain YSC-like 1 [Source:MGI Symbol;Acc:MGI:1346118]	-	214	276	255	294	429	378	327	8.33253	9.08391	9.44085	9.34279	13.4153	12.9669	10.5464
ENSMUSG00000112649	952.004	987.562	740.009	801.999	1330.1	1252.47	1287.33	-0.540854	1.40211e-06	3.43774e-05	Gm47647	12	58923194	58924459	-	1266	transcribed_processed_pseudogene	predicted gene, 47647 [Source:MGI Symbol;Acc:MGI:6096728]	-	826	1070	747	894	1391	1194	1272	58.3124	63.8507	50.1429	51.5092	78.8655	74.262	74.3812
ENSMUSG00000026646	441.425	431.943	414.088	485.326	643.533	694.42	628.483	-0.54067	1.88354e-07	5.69518e-06	Suv39h2	2	3455815	3475031	-	4410	protein_coding	suppressor of variegation 3-9 2 [Source:MGI Symbol;Acc:MGI:1890396]	-	383	468	418	541	673	662	621	9.77399	10.0953	10.1428	11.2677	13.7933	14.8837	13.1268
ENSMUSG00000032262	6876.09	6433.92	5045.34	6436.62	9238.96	8798.79	9436.36	-0.540154	2.10029e-07	6.215e-06	Elovl4	9	83778692	83806277	-	3026	protein_coding	elongation of very long chain fatty acids (FEN1/Elo2, SUR4/Elo3, yeast)-like 4 [Source:MGI Symbol;Acc:MGI:1933331]	-	5966	6971	5093	7175	9662	8388	9324	214.486	211.842	174.099	210.525	278.973	265.678	277.66
ENSMUSG00000002957	6968.3	5435.28	4698.61	6068.82	8445.3	8356.12	8986	-0.539788	3.7e-06	8.17795e-05	Ap2a2	7	141562173	141633011	+	5663	protein_coding	adaptor-related protein complex 2, alpha 2 subunit [Source:MGI Symbol;Acc:MGI:101920]	-	6046	5889	4743	6765	8832	7966	8879	181.792	149.675	135.603	166.012	213.277	211.022	221.139
ENSMUSG00000032840	1308.14	1316.13	1120.42	1345.64	1747.96	1825.21	2056.49	-0.5396	4.2858e-08	1.46277e-06	2410131K14Rik	5	118245227	118266093	+	5649	protein_coding	RIKEN cDNA 2410131K14 gene [Source:MGI Symbol;Acc:MGI:1924042]	-	1135	1426	1131	1500	1828	1740	2032	13.6594	14.5063	12.9421	14.7331	17.6681	18.4487	20.256
ENSMUSG00000087390	131.39	107.986	114.914	133.666	150.126	211.893	195.326	-0.53919	0.00104901	0.00991309	Gm7598	X	38476461	38482486	+	3123	lincRNA	predicted gene 7598 [Source:MGI Symbol;Acc:MGI:3644312]	-	114	117	116	149	157	202	193	2.48165	2.15289	2.40105	2.64721	2.74482	3.87407	3.48007
ENSMUSG00000052446	246.645	254.736	226.857	201.845	384.399	365.043	294.507	-0.539082	0.000100872	0.00141684	Zfp961	8	71951038	71993792	+	4334	protein_coding	zinc finger protein 961 [Source:MGI Symbol;Acc:MGI:3583954]	zf-C2H2	214	276	229	225	402	348	291	12.4667	13.5908	12.6847	10.6976	18.808	17.8606	14.0419
ENSMUSG00000002266	123.323	95.9874	76.2794	97.7829	179.769	144.758	129.542	-0.538217	0.00323913	0.0238741	Zim1	7	6671269	6696450	-	8086	protein_coding	zinc finger, imprinted 1 [Source:MGI Symbol;Acc:MGI:1341879]	zf-C2H2	107	104	77	109	188	138	128	2.2556	1.85315	1.54339	1.8753	3.18284	2.56294	2.23503
ENSMUSG00000031557	781.427	665.451	559.712	741.894	1031.76	1013.31	1008	-0.53798	3.64421e-06	8.06786e-05	Plekha2	8	25039144	25102376	-	5579	protein_coding	pleckstrin homology domain-containing, family A (phosphoinositide binding specific) member 2 [Source:MGI Symbol;Acc:MGI:1928144]	-	678	721	565	827	1079	966	996	21.8038	19.5992	17.2766	21.7057	27.8678	27.3691	26.5312
ENSMUSG00000097574	100.272	164.286	153.549	120.21	246.704	229.725	151.808	-0.53776	0.0044863	0.030497	C920006O11Rik	9	78175914	78178879	+	1444	lincRNA	RIKEN cDNA C920006O11 gene [Source:MGI Symbol;Acc:MGI:2443759]	-	87	178	155	134	258	219	150	4.096	7.08371	6.93873	5.14886	9.75526	9.08376	5.8496
ENSMUSG00000061654	403.391	388.564	265.492	425.221	514.444	557.005	599.134	-0.536966	0.00024098	0.0029442	Spry3	GL456233.1	101352	106395	-	4349	protein_coding	sprouty RTK signaling antagonist 3 [Source:NCBI gene;Acc:236576]	-	350	421	268	474	538	531	592	5.47124	5.56289	3.98346	6.04731	6.75428	7.31297	7.6654
ENSMUSG00000085465	97.9665	107.986	91.139	69.076	107.096	154.199	165.976	-0.536902	0.00507777	0.0335822	Gm15347	8	12860358	12877344	-	385	antisense	predicted gene 15347 [Source:MGI Symbol;Acc:MGI:3705310]	-	85	117	92	77	112	147	164	15.0095	17.4636	15.4469	11.0969	15.8834	22.8689	23.9875
ENSMUSG00000000934	371.12	365.49	346.724	363.322	514.444	505.605	578.893	-0.535601	4.76879e-07	1.28266e-05	Top1mt	15	75657035	75678800	-	2043	protein_coding	DNA topoisomerase 1, mitochondrial [Source:MGI Symbol;Acc:MGI:1920210]	-	322	396	350	405	538	482	572	19.4932	20.2639	20.1467	20.0101	26.1571	25.7073	28.6826
ENSMUSG00000041930	712.274	757.746	676.608	751.762	1123.55	1035.34	1030.27	-0.535366	4.20959e-09	1.71244e-07	Fam222a	5	114568016	114613220	+	3141	protein_coding	family with sequence similarity 222, member A [Source:MGI Symbol;Acc:MGI:3605543]	-	618	821	683	838	1175	987	1018	22.8586	25.6688	24.021	25.2972	34.9043	32.1633	31.1892
ENSMUSG00000035984	50.7121	74.7594	58.4478	62.7963	106.14	90.2117	92.0966	-0.535347	0.00517076	0.0340827	Nme5	18	34562634	34579115	-	1154	protein_coding	NME/NM23 family member 5 [Source:MGI Symbol;Acc:MGI:1922783]	-	44	81	59	70	111	86	91	4.15458	6.46488	5.29706	5.39435	8.41738	7.15409	7.11723
ENSMUSG00000057337	1075.33	1384.43	1089.71	1227.22	1694.41	1881.86	1700.24	-0.533703	5.04251e-07	1.34226e-05	Chst3	10	60181532	60219260	-	6497	protein_coding	carbohydrate (chondroitin 6/keratan) sulfotransferase 3 [Source:MGI Symbol;Acc:MGI:1858224]	-	933	1500	1100	1368	1772	1794	1680	13.825	18.7878	15.4983	16.5438	21.0876	23.42	20.62
ENSMUSG00000037697	3242.11	3151.89	2964	3191.85	4060.09	5019.34	4706.03	-0.533669	3.06625e-09	1.28206e-07	Ddhd1	14	45588467	45658143	-	14076	protein_coding	DDHD domain containing 1 [Source:MGI Symbol;Acc:MGI:2150302]	-	2813	3415	2992	3558	4246	4785	4650	57.412	58.9147	58.0634	59.2659	69.5972	86.0391	78.6105
ENSMUSG00000110170	68.0003	60.9151	75.2887	68.1789	90.8405	118.534	105.253	-0.533365	0.00365649	0.0260965	St6galnac2	11	116677483	116681290	-	1683	protein_coding	ST6 (alpha-N-acetyl-neuraminyl-2,3-beta-galactosyl-1,3)-N-acetylgalactosaminide alpha-2,6-sialyltransferase 2 [Source:MGI Symbol;Acc:MGI:107553]	-	59	66	76	76	95	113	104	2.38328	2.25355	2.91907	2.50555	3.08195	4.02145	3.47978
ENSMUSG00000042570	841.359	1032.79	870.774	910.547	1379.82	1407.72	1238.75	-0.532335	1.19704e-07	3.78452e-06	Mier2	10	79540245	79555199	-	4497	protein_coding	MIER family member 2 [Source:MGI Symbol;Acc:MGI:1917677]	-	730	1119	879	1015	1443	1342	1224	48.1829	62.4311	55.1654	54.6767	76.4919	78.0376	66.9186
ENSMUSG00000041840	175.187	203.973	155.531	194.669	269.653	281.125	265.157	-0.53205	0.000105376	0.0014698	Haus1	18	77757567	77767780	-	1004	protein_coding	HAUS augmin-like complex, subunit 1 [Source:MGI Symbol;Acc:MGI:2385076]	-	152	221	157	217	282	268	262	10.2924	12.6493	10.1084	11.9922	15.3356	15.9878	14.695
ENSMUSG00000022831	429.9	566.695	514.143	504.165	737.242	785.681	706.411	-0.531987	2.11064e-06	4.90153e-05	Hcls1	16	36934983	36963212	+	2525	protein_coding	hematopoietic cell specific Lyn substrate 1 [Source:MGI Symbol;Acc:MGI:104568]	-	373	614	519	562	771	749	698	20.5662	28.6163	27.2094	25.2899	34.1411	36.3837	31.8783
ENSMUSG00000026049	74.9156	86.7578	84.2045	62.7963	124.308	103.848	126.506	-0.531846	0.00325589	0.0239585	Tex30	1	44086613	44102441	-	1926	protein_coding	testis expressed 30 [Source:MGI Symbol;Acc:MGI:1922873]	-	65	94	85	70	130	99	125	5.36934	6.56351	6.67628	4.71924	8.62442	7.20483	8.55288
ENSMUSG00000074794	1954.72	1562.56	1158.06	1376.14	2261.45	2058.09	2440.05	-0.530143	0.000171913	0.00222718	Arrdc3	13	80883384	80896042	+	6266	protein_coding	arrestin domain containing 3 [Source:MGI Symbol;Acc:MGI:2145242]	-	1696	1693	1169	1534	2365	1962	2411	49.2109	41.5234	32.2521	36.3267	55.1119	50.1551	57.9465
ENSMUSG00000097835	109.492	151.365	115.905	118.416	183.593	198.256	178.121	-0.529795	0.000776498	0.00779569	Gm26910	18	67773712	67774857	-	698	lincRNA	predicted gene, 26910 [Source:MGI Symbol;Acc:MGI:5477404]	-	95	164	117	132	192	189	176	9.25285	13.5019	10.8354	10.4928	15.0187	16.2179	14.1991
ENSMUSG00000097145	141.763	103.371	104.017	144.432	177.856	156.297	230.748	-0.529415	0.00305045	0.0228266	9230114K14Rik	5	52190672	52279034	+	2762	processed_transcript	RIKEN cDNA 9230114K14 gene [Source:MGI Symbol;Acc:MGI:3041212]	-	123	112	105	161	186	149	228	8.18204	6.2976	6.64131	8.74075	9.93684	8.73221	12.5628
ENSMUSG00000100252	13099.8	16181.3	13675.8	12615.8	23076.4	22105	16344.6	-0.529269	1.55908e-05	0.000284952	Mir124-2hg	3	17789921	17808970	+	6013	lincRNA	Mir124-2 host gene (non-protein coding) [Source:MGI Symbol;Acc:MGI:1917691]	-	11366	17532	13805	14063	24133	21073	16150	638.074	831.946	736.898	644.328	1088.06	1042.25	750.984
ENSMUSG00000074579	104.882	81.2201	107.98	101.371	134.826	153.15	159.904	-0.528701	0.00145317	0.0127833	Lekr1	3	65666228	65831159	+	7113	protein_coding	leucine, glutamate and lysine rich 1 [Source:MGI Symbol;Acc:MGI:3645902]	-	91	88	109	113	141	146	158	4.14371	3.38712	4.71935	4.19945	5.15639	5.85709	5.95936
ENSMUSG00000040009	1407.26	1445.35	1217.5	1372.55	1890.44	1886.05	2185.02	-0.527404	3.91342e-08	1.34845e-06	Gnaz	10	74967177	75016907	+	3612	protein_coding	guanine nucleotide binding protein, alpha z subunit [Source:MGI Symbol;Acc:MGI:95780]	-	1221	1566	1229	1530	1977	1798	2159	33.23	36.0253	31.8035	33.9838	43.2116	43.1108	48.6701
ENSMUSG00000048154	9239.97	7746.37	7219.79	8249.64	8928.19	11974	15271.8	-0.52622	0.000203843	0.0025833	Kmt2d	15	98831669	98871204	-	19931	protein_coding	lysine (K)-specific methyltransferase 2D [Source:MGI Symbol;Acc:MGI:2682319]	-	8017	8393	7288	9196	9337	11415	15090	65.2807	57.7684	56.4273	61.1136	61.0603	81.8898	101.779
ENSMUSG00000034442	186.713	183.668	165.437	149.814	265.828	251.754	242.892	-0.525157	0.000129498	0.00175333	Trmt5	12	73280011	73286710	-	2139	protein_coding	TRM5 tRNA methyltransferase 5 [Source:MGI Symbol;Acc:MGI:1923607]	-	162	199	167	167	278	240	240	11.1585	11.5863	10.9374	9.38799	15.3785	14.5641	13.6929
ENSMUSG00000031788	424.137	395.948	389.322	411.765	647.358	616.796	516.146	-0.524145	3.3182e-06	7.40982e-05	Kifc3	8	95099828	95202812	-	5298	protein_coding	kinesin family member C3 [Source:MGI Symbol;Acc:MGI:109202]	-	368	429	393	459	677	588	510	17.5689	17.3123	17.8401	17.8845	25.9576	24.7318	20.168
ENSMUSG00000072962	89.8987	83.066	79.2513	89.709	121.439	120.632	144.723	-0.524056	0.00186662	0.0154802	Gm16401	5	44100442	44102515	+	2074	antisense	predicted gene 16401 [Source:MGI Symbol;Acc:MGI:3648398]	-	78	90	80	100	127	115	143	2.55801	2.49489	2.49463	2.67654	3.34496	3.32267	3.88454
ENSMUSG00000027353	202.848	182.745	197.138	202.742	254.353	326.231	289.446	-0.52218	0.000104362	0.00145857	Mcm8	2	132816141	132844197	+	3718	protein_coding	minichromosome maintenance 8 homologous recombination repair factor [Source:MGI Symbol;Acc:MGI:1913884]	-	176	198	199	226	266	311	286	4.90981	4.66893	5.27853	5.14549	5.95954	7.64352	6.60865
ENSMUSG00000066892	456.409	523.316	487.395	523.901	780.272	762.603	638.604	-0.520291	2.37208e-06	5.4179e-05	Fbxl12	9	20618118	20644767	-	5090	protein_coding	F-box and leucine-rich repeat protein 12 [Source:MGI Symbol;Acc:MGI:1354738]	-	396	567	492	584	816	727	631	15.21	18.4085	17.9683	18.3068	25.1712	24.6008	20.0751
ENSMUSG00000091985	245.492	153.211	175.343	205.434	278.259	272.733	319.808	-0.520105	0.000980703	0.00936083	Gm17354	4	108633843	108637441	-	3039	lincRNA	predicted gene, 17354 [Source:MGI Symbol;Acc:MGI:4936988]	-	213	166	177	229	291	260	316	4.76493	3.13896	3.76494	4.18098	5.22816	5.12426	5.85543
ENSMUSG00000027715	413.764	394.102	390.313	392.926	564.167	554.907	616.339	-0.520016	2.85165e-07	8.14414e-06	Ccna2	3	36564865	36572150	-	4083	protein_coding	cyclin A2 [Source:MGI Symbol;Acc:MGI:108069]	-	359	427	394	438	590	529	609	14.3736	14.451	14.9994	14.3123	18.9715	18.6598	20.1968
ENSMUSG00000020782	1856.75	2079.42	1751.45	1766.37	2944.19	2765.09	2414.75	-0.519259	1.54744e-07	4.75877e-06	Llgl2	11	115824049	115855780	+	4844	protein_coding	LLGL2 scribble cell polarity complex component [Source:MGI Symbol;Acc:MGI:1918843]	-	1611	2253	1768	1969	3079	2636	2386	97.0943	114.778	101.318	96.8523	149.035	139.967	119.114
ENSMUSG00000108869	94.5088	125.522	105.008	98.68	175.944	133.22	169.012	-0.519165	0.00211128	0.0170999	Gm44532	7	70420915	70453222	-	2598	lincRNA	predicted gene 44532 [Source:MGI Symbol;Acc:MGI:5753108]	-	82	136	106	110	184	127	167	2.14576	3.00821	2.63744	2.34924	3.86692	2.92788	3.61976
ENSMUSG00000037400	4071.95	4334.2	3809.02	3930.15	6227.83	5985.44	5303.14	-0.517962	1.58075e-09	6.98205e-08	Atp11b	3	35754106	35856276	+	9176	protein_coding	ATPase, class VI, type 11B [Source:MGI Symbol;Acc:MGI:1923545]	-	3533	4696	3845	4381	6513	5706	5240	104.293	117.177	107.924	105.549	154.409	148.397	128.127
ENSMUSG00000086502	201.696	196.59	167.418	198.257	221.842	310.496	318.796	-0.517076	0.000675364	0.00696664	B130055M24Rik	7	127448636	127460360	+	1988	processed_transcript	RIKEN cDNA B130055M24 gene [Source:MGI Symbol;Acc:MGI:3590645]	-	175	213	169	221	232	296	315	8.14878	8.38368	7.48254	8.39872	8.67604	12.143	12.1495
ENSMUSG00000041642	8219.96	6521.6	6360.91	7454.82	9303.02	9860.35	12055.5	-0.516318	6.64675e-06	0.000135652	Kif21b	1	136131389	136177998	+	12184	protein_coding	kinesin family member 21B [Source:MGI Symbol;Acc:MGI:109234]	-	7132	7066	6421	8310	9729	9400	11912	120.913	101.26	103.508	114.982	132.468	140.402	167.279
ENSMUSG00000034684	2831.81	2972.84	2519.2	2580.93	3887.97	4197.99	3737.5	-0.516166	5.33774e-09	2.13759e-07	Sema3f	9	107681500	107710475	-	5197	protein_coding	sema domain, immunoglobulin domain (Ig), short basic domain, secreted, (semaphorin) 3F [Source:MGI Symbol;Acc:MGI:1096347]	-	2457	3221	2543	2877	4066	4002	3693	131.318	145.516	129.233	125.495	174.529	188.442	163.491
ENSMUSG00000037446	20924.5	21183.7	17550.2	21198.2	27858.4	28514.2	31343.2	-0.51616	1.12412e-08	4.21161e-07	Tulp1	17	28351515	28365222	-	6664	protein_coding	tubby like protein 1 [Source:MGI Symbol;Acc:MGI:109571]	Tub	18155	22952	17716	23630	29134	27183	30970	919.711	982.824	853.353	976.978	1185.32	1213.2	1299.54
ENSMUSG00000002835	136.001	111.678	120.858	120.21	171.163	200.354	171.037	-0.515181	0.000702412	0.0071799	Chaf1a	17	56040439	56072289	+	8854	protein_coding	chromatin assembly factor 1, subunit A (p150) [Source:MGI Symbol;Acc:MGI:1351331]	-	118	121	122	134	179	191	169	1.72408	1.49438	1.69489	1.59788	2.10042	2.45861	2.0453
ENSMUSG00000038679	607.392	533.468	443.807	506.856	671.264	762.603	859.231	-0.514791	4.54035e-05	0.000719627	Trps1	15	50654752	50890463	-	13380	protein_coding	transcriptional repressor GATA binding 1 [Source:MGI Symbol;Acc:MGI:1927616]	zf-GATA	527	578	448	565	702	727	849	7.69659	7.13536	6.22119	6.73445	8.23387	9.35413	10.2705
ENSMUSG00000031823	671.935	682.987	643.917	709.599	1006.9	1009.11	918.942	-0.514072	1.48039e-08	5.44452e-07	Zdhhc7	8	120080890	120101482	-	3677	protein_coding	zinc finger, DHHC domain containing 7 [Source:MGI Symbol;Acc:MGI:2142662]	-	583	740	650	791	1053	962	908	36.1631	38.7998	38.337	40.0442	52.4571	52.5718	46.6528
ENSMUSG00000025417	2348.89	2662.73	2300.27	2533.38	3807.65	3656.72	3204.15	-0.513727	2.40875e-08	8.61272e-07	Pip4k2c	10	127197067	127211585	-	5456	protein_coding	phosphatidylinositol-5-phosphate 4-kinase, type II, gamma [Source:MGI Symbol;Acc:MGI:2152214]	-	2038	2885	2322	2824	3982	3486	3166	46.0917	55.1524	49.9331	52.1254	72.3267	69.4587	59.3095
ENSMUSG00000061175	1449.9	1087.24	853.933	1283.74	1485.96	1685.7	2013.98	-0.513663	0.000655036	0.00679977	Fnip2	3	79455974	79567796	-	8364	protein_coding	folliculin interacting protein 2 [Source:MGI Symbol;Acc:MGI:2683054]	-	1258	1178	862	1431	1554	1607	1990	27.2717	21.5862	17.7683	25.3184	27.0559	30.6922	35.7338
ENSMUSG00000097284	225.899	198.435	176.334	216.199	261.047	350.357	291.471	-0.513021	0.000387453	0.00440802	4930480K23Rik	14	69732784	69767113	+	3755	lincRNA	RIKEN cDNA 4930480K23 gene [Source:MGI Symbol;Acc:MGI:1922266]	-	196	215	178	241	273	334	288	6.11233	5.66748	5.27811	6.13386	6.83742	9.17653	7.43941
ENSMUSG00000097430	134.848	236.277	199.119	148.917	297.383	288.468	227.711	-0.512607	0.00390195	0.0273394	Gm10544	18	37159854	37178522	-	5051	processed_transcript	predicted gene 10544 [Source:MGI Symbol;Acc:MGI:3642892]	-	117	256	201	166	311	275	225	4.0315	7.45626	6.58543	4.66825	8.60636	8.34823	6.42181
ENSMUSG00000052609	1538.65	1338.29	1170.94	1430.86	1768.04	1935.36	2270.03	-0.512457	8.87745e-06	0.000175033	Plekhg3	12	76530891	76580488	+	11727	protein_coding	pleckstrin homology domain containing, family G (with RhoGef domain) member 3 [Source:MGI Symbol;Acc:MGI:2388284]	-	1335	1450	1182	1595	1849	1845	2243	28.8398	26.4776	24.2793	28.1214	32.0794	35.1146	40.1361
ENSMUSG00000031755	1496.01	1730.54	1525.59	1471.23	2214.6	2452.5	2073.69	-0.511823	7.4347e-08	2.46397e-06	Bbs2	8	94067954	94098928	-	3311	protein_coding	Bardet-Biedl syndrome 2 (human) [Source:MGI Symbol;Acc:MGI:2135267]	-	1298	1875	1540	1640	2316	2338	2049	64.9326	79.2848	73.2515	66.9573	93.0477	103.042	84.9034
ENSMUSG00000037995	1723.06	2052.65	1854.48	1815.71	2572.22	2851.11	2625.26	-0.511401	6.46739e-09	2.5559e-07	Igsf9	1	172481788	172498878	+	6612	protein_coding	immunoglobulin superfamily, member 9 [Source:MGI Symbol;Acc:MGI:2135283]	-	1495	2224	1872	2024	2690	2718	2594	65.784	82.7207	78.3236	72.6868	95.0627	105.368	94.5461
ENSMUSG00000090877	503.663	452.248	384.369	470.075	654.052	630.433	684.146	-0.510707	6.24465e-06	0.000129499	Hspa1b	17	34956436	34959238	-	2803	protein_coding	heat shock protein 1B [Source:MGI Symbol;Acc:MGI:99517]	-	437	490	388	524	684	601	676	10.599	10.0457	8.94796	10.3725	13.3235	12.8422	13.5808
ENSMUSG00000073590	344.612	377.489	349.696	352.557	501.057	507.703	537.399	-0.510704	8.72702e-07	2.22446e-05	3222401L13Rik	18	37655451	37661742	+	6292	lincRNA	RIKEN cDNA 3222401L13 gene [Source:MGI Symbol;Acc:MGI:2444186]	-	299	409	353	393	524	484	531	4.45675	5.15313	5.00299	4.78086	6.27274	6.35585	6.55597
ENSMUSG00000022383	267.391	266.734	190.203	319.364	405.436	378.679	372.435	-0.510442	0.000764905	0.00769646	Ppara	15	85734983	85802819	+	3836	protein_coding	peroxisome proliferator activated receptor alpha [Source:MGI Symbol;Acc:MGI:104740]	THR-like	232	289	192	356	424	361	368	10.473	11.0276	8.24122	13.1159	15.3719	14.3572	13.7602
ENSMUSG00000041488	11835.5	11001.6	9429.91	10902.3	15179	15301.4	16067.3	-0.508586	7.51344e-09	2.91182e-07	Stx3	19	11775118	11819403	-	5711	protein_coding	syntaxin 3 [Source:MGI Symbol;Acc:MGI:103077]	-	10269	11920	9519	12153	15874	14587	15876	473.308	464.4	417.172	457.157	587.599	592.328	606.11
ENSMUSG00000031847	213.221	180.899	198.128	252.98	261.047	317.839	356.242	-0.508115	0.000801713	0.00797773	1700030J22Rik	8	116969594	116978959	-	2996	protein_coding	RIKEN cDNA 1700030J22 gene [Source:MGI Symbol;Acc:MGI:1916778]	-	185	196	200	282	273	303	352	5.64247	5.05305	5.8001	7.0196	6.68712	8.14181	8.89273
ENSMUSG00000027475	2245.16	1948.36	1763.34	2045.37	2681.23	2865.79	3098.9	-0.507434	2.99541e-07	8.48748e-06	Kif3b	2	153291413	153333390	+	5635	protein_coding	kinesin family member 3B [Source:MGI Symbol;Acc:MGI:107688]	-	1948	2111	1780	2280	2804	2732	3062	23.5019	21.5279	20.4193	22.4499	27.1688	29.0386	30.5994
ENSMUSG00000048832	787.19	923.878	891.577	845.956	1342.53	1222.05	1158.8	-0.50654	1.602e-07	4.9098e-06	Vps37c	19	10688815	10714419	+	2415	protein_coding	vacuolar protein sorting 37C [Source:MGI Symbol;Acc:MGI:2147661]	-	683	1001	900	943	1404	1165	1145	19.227	23.8191	24.0902	21.6655	31.7421	28.8933	26.6987
ENSMUSG00000056598	314.645	292.577	305.117	289.76	434.122	403.855	463.519	-0.50573	6.20571e-06	0.000128989	Drc3	11	60353329	60394341	+	4519	protein_coding	dynein regulatory complex subunit 3 [Source:MGI Symbol;Acc:MGI:1921915]	-	273	317	308	323	454	385	458	10.3801	10.1883	11.1352	10.0232	13.8636	12.8968	14.4245
ENSMUSG00000036473	3447.27	3530.3	2845.12	3480.71	4417.72	5034.02	4896.3	-0.505472	1.74699e-07	5.318e-06	Tbc1d24	17	24175431	24209387	-	13362	protein_coding	TBC1 domain family, member 24 [Source:MGI Symbol;Acc:MGI:2443456]	-	2991	3825	2872	3880	4620	4799	4838	49.3785	53.3769	45.0831	52.278	61.2551	69.7996	66.1579
ENSMUSG00000028639	7416.64	6697.89	5743.74	7470.97	9003.73	9594.96	10958.5	-0.504747	2.82753e-06	6.3893e-05	Ybx1	4	119277981	119294604	-	2531	protein_coding	Y box protein 1 [Source:MGI Symbol;Acc:MGI:99146]	CSD	6435	7257	5798	8328	9416	9147	10828	560.151	533.966	479.891	591.648	658.267	701.481	780.728
ENSMUSG00000034075	3048.49	2865.78	2289.37	2891.32	3616.41	4171.77	4210.13	-0.504638	2.84393e-06	6.40631e-05	Zdhhc5	2	84687970	84715180	-	5047	protein_coding	zinc finger, DHHC domain containing 5 [Source:MGI Symbol;Acc:MGI:1923573]	-	2645	3105	2311	3223	3782	3977	4160	95.1922	94.4577	79.083	94.6677	109.314	126.099	124.012
ENSMUSG00000028906	12620.4	11209.3	9729.09	11548.2	15230.6	16019.9	17366.8	-0.5046	2.01192e-07	6.00279e-06	Epb41	4	131923413	132075321	-	15942	protein_coding	erythrocyte membrane protein band 4.1 [Source:MGI Symbol;Acc:MGI:95401]	-	10950	12145	9821	12873	15928	15272	17160	173.243	162.42	147.743	166.222	202.387	212.872	224.882
ENSMUSG00000020895	200.543	267.657	262.52	168.653	375.793	388.12	245.928	-0.504052	0.00476019	0.0319729	Tmem107	11	69070806	69073293	+	1369	protein_coding	transmembrane protein 107 [Source:MGI Symbol;Acc:MGI:1914160]	-	174	290	265	188	393	370	243	19.6499	27.6828	28.4554	17.3275	35.6437	36.8124	22.7307
ENSMUSG00000054901	79.5257	91.3726	93.1203	95.9887	154.907	132.171	115.374	-0.50399	0.00330456	0.0242079	Arhgef33	17	80307407	80400081	+	4680	protein_coding	Rho guanine nucleotide exchange factor (GEF) 33 [Source:MGI Symbol;Acc:MGI:2685787]	-	69	99	94	107	162	126	114	4.42956	5.37214	5.73782	5.60611	8.35229	7.12628	6.06193
ENSMUSG00000085704	106.034	90.4496	94.1109	113.033	144.389	162.591	140.675	-0.503578	0.0019182	0.0158278	4921531C22Rik	2	179975993	179979013	+	1967	processed_transcript	RIKEN cDNA 4921531C22 gene [Source:MGI Symbol;Acc:MGI:1913980]	-	92	98	95	126	151	155	139	4.99165	4.49452	4.90104	5.57947	6.57979	7.40916	6.24692
ENSMUSG00000011179	2283.2	2183.71	1903.02	1984.36	3133.52	2799.71	3044.25	-0.503068	3.53882e-08	1.23831e-06	Odc1	12	17544794	17551505	+	3405	protein_coding	ornithine decarboxylase, structural 1 [Source:MGI Symbol;Acc:MGI:97402]	-	1981	2366	1921	2212	3277	2669	3008	120.895	122.05	111.47	110.173	160.612	143.5	152.053
ENSMUSG00000007867	168.272	300.883	311.061	235.935	443.684	390.218	307.663	-0.502934	0.0049174	0.0327463	Ift43	12	86082541	86162459	+	1651	protein_coding	intraflagellar transport 43 [Source:MGI Symbol;Acc:MGI:1923661]	-	146	326	314	263	464	372	304	15.3648	28.9997	31.4205	22.589	39.2168	34.4905	26.4999
ENSMUSG00000020829	587.799	603.613	487.395	545.431	762.104	735.33	910.845	-0.502605	1.48103e-05	0.000272621	Slc46a1	11	78465697	78472059	+	3080	protein_coding	solute carrier family 46, member 1 [Source:MGI Symbol;Acc:MGI:1098733]	-	510	654	492	608	797	701	900	22.8105	24.7253	20.9236	22.1939	28.6287	27.6225	33.3427
ENSMUSG00000035615	4054.66	3724.13	3380.07	3575.8	5376.8	5256.4	5157.41	-0.502203	1.00294e-09	4.55265e-08	Frmpd1	4	45184875	45285936	+	5324	protein_coding	FERM and PDZ domain containing 1 [Source:MGI Symbol;Acc:MGI:2446274]	-	3518	4035	3412	3986	5623	5011	5096	66.9189	64.8779	61.712	61.8808	85.9013	83.9766	80.2929
ENSMUSG00000020599	12744.9	10047.3	8648.3	11698.1	13674.8	15386.3	17845.5	-0.50189	8.59869e-05	0.00123373	Rgs9	11	109225355	109298129	-	6390	protein_coding	regulator of G-protein signaling 9 [Source:MGI Symbol;Acc:MGI:1338824]	-	11058	10886	8730	13040	14301	14668	17633	356.288	296.479	267.453	342.901	370.058	416.368	470.594
ENSMUSG00000105881	71.4579	89.5267	111.942	78.0469	111.877	158.395	127.518	-0.501887	0.00779748	0.0459876	4932422M17Rik	5	123138931	123141569	+	2639	lincRNA	RIKEN cDNA 4932422M17 gene [Source:MGI Symbol;Acc:MGI:1921616]	-	62	97	113	87	117	151	126	1.5972	2.11223	2.76793	1.82917	2.42065	3.42709	2.68865
ENSMUSG00000109695	91.0512	119.061	83.2139	92.4003	136.739	176.227	121.446	-0.501821	0.00581205	0.0373367	Gm31166	19	5512528	5550368	+	1565	transcribed_processed_pseudogene	predicted gene, 31166 [Source:MGI Symbol;Acc:MGI:5590325]	-	79	129	84	103	143	168	120	8.69053	11.9952	8.7863	9.24745	12.6338	16.2821	10.9344
ENSMUSG00000039395	931.258	894.344	705.336	830.706	1242.12	1117.16	1269.11	-0.501438	5.52345e-06	0.000115877	Mreg	1	72159442	72212307	-	2284	protein_coding	melanoregulin [Source:MGI Symbol;Acc:MGI:2151839]	-	808	969	712	926	1299	1065	1254	24.0504	24.3801	20.1511	22.4951	31.0527	27.9281	30.9175
ENSMUSG00000034777	394.171	467.938	450.742	468.281	686.563	579.033	659.857	-0.501285	6.49644e-06	0.000133188	Vax2	6	83711264	83738313	+	1242	protein_coding	ventral anterior homeobox 2 [Source:MGI Symbol;Acc:MGI:1346018]	Homeobox	342	507	455	522	718	552	652	18.7203	23.4582	23.6813	23.3197	31.5638	26.6199	29.5616
ENSMUSG00000028977	6295.21	5642.95	4928.44	5326.92	7038.7	8097.02	8777.51	-0.501073	1.68519e-06	4.01173e-05	Casz1	4	148804429	148954889	+	12224	protein_coding	castor zinc finger 1 [Source:MGI Symbol;Acc:MGI:1196251]	-	5462	6114	4975	5938	7361	7719	8673	118.598	112.215	102.713	105.228	128.363	147.661	155.987
ENSMUSG00000028397	2915.94	3107.59	2577.65	2669.74	4077.3	4090.99	3913.6	-0.500879	7.21254e-09	2.81015e-07	Kdm4c	4	74242497	74405860	+	5823	protein_coding	lysine (K)-specific demethylase 4C [Source:MGI Symbol;Acc:MGI:1924054]	-	2530	3367	2602	2976	4264	3900	3867	86.302	97.0831	84.3947	82.8513	116.814	117.205	109.262
ENSMUSG00000029817	1995.06	2333.23	2279.47	2340.51	2620.03	3478.39	3576.59	-0.500813	1.17435e-05	0.000222446	Tra2a	6	49243924	49264033	-	6945	protein_coding	transformer 2 alpha [Source:MGI Symbol;Acc:MGI:1933972]	-	1731	2528	2301	2609	2740	3316	3534	47.1099	58.1557	59.5442	57.9502	59.8886	79.508	79.6666
ENSMUSG00000025035	2147.19	3174.04	2715.35	2586.31	4315.4	3696.58	3507.77	-0.500612	4.63469e-05	0.000732006	Arl3	19	46531109	46573085	-	822	protein_coding	ADP-ribosylation factor-like 3 [Source:MGI Symbol;Acc:MGI:1929699]	-	1863	3439	2741	2883	4513	3524	3466	154.081	240.419	215.552	194.602	299.764	256.775	237.443
ENSMUSG00000007777	312.34	520.547	457.676	373.19	730.549	675.539	448.338	-0.500446	0.00364317	0.0260427	0610009B22Rik	11	51685386	51688874	-	998	protein_coding	RIKEN cDNA 0610009B22 gene [Source:MGI Symbol;Acc:MGI:1913300]	-	271	564	462	416	764	644	443	21.6241	38.0406	35.0524	27.0911	48.9599	45.2725	29.2797
ENSMUSG00000022833	267.391	255.659	220.913	213.508	318.42	350.357	370.41	-0.499445	0.000127511	0.00172903	Ccdc14	16	34690616	34725202	+	9141	protein_coding	coiled-coil domain containing 14 [Source:MGI Symbol;Acc:MGI:2443448]	-	232	277	223	238	333	334	366	3.95098	3.98747	3.61102	3.30796	4.55449	5.01123	5.16289
ENSMUSG00000040621	112.95	109.832	126.802	92.4003	178.812	147.905	160.916	-0.499362	0.00217958	0.0175192	Gemin8	X	166170454	166190512	+	2487	protein_coding	gem nuclear organelle associated protein 8 [Source:MGI Symbol;Acc:MGI:2384300]	-	98	119	128	103	187	141	159	5.0588	5.19241	6.2826	4.33935	7.75251	6.41242	6.79851
ENSMUSG00000014786	979.665	1157.39	999.557	967.961	1370.26	1600.73	1435.09	-0.497083	6.64708e-07	1.72604e-05	Slc9a5	8	105348843	105369881	+	5240	protein_coding	solute carrier family 9 (sodium/hydrogen exchanger), member 5 [Source:MGI Symbol;Acc:MGI:2685542]	-	850	1254	1009	1079	1433	1526	1418	15.4716	19.2937	17.4629	16.0289	20.948	24.471	21.379
ENSMUSG00000024120	2005.43	1665.01	1480.02	1731.38	2172.52	2516.49	2726.46	-0.496742	1.4959e-05	0.000274797	Lrpprc	17	84705247	84790789	-	8504	protein_coding	leucine-rich PPR-motif containing [Source:MGI Symbol;Acc:MGI:1919666]	-	1740	1804	1494	1930	2272	2399	2694	58.5896	51.3462	47.8332	53.0389	61.441	71.1676	75.1387
ENSMUSG00000019039	994.648	1417.66	1313.59	1136.61	1980.32	2113.68	1249.88	-0.496555	0.00148497	0.0130222	Dalrd3	9	108569886	108572774	+	2458	protein_coding	DALR anticodon binding domain containing 3 [Source:MGI Symbol;Acc:MGI:1915039]	-	863	1536	1326	1267	2071	2015	1235	70.9435	106.732	103.646	85.005	136.729	145.935	84.0938
ENSMUSG00000035121	92.2038	135.674	143.643	97.7829	183.593	187.766	152.82	-0.496494	0.00520577	0.0342509	Neil2	14	63182443	63193856	-	5017	protein_coding	nei like 2 (E. coli) [Source:MGI Symbol;Acc:MGI:2686058]	-	80	147	145	109	192	179	151	3.31428	5.14774	5.71182	3.68546	6.38821	6.53331	5.18168
ENSMUSG00000037960	180.95	302.729	260.539	243.112	410.217	402.806	282.362	-0.496492	0.00324389	0.0238995	Card19	13	49202950	49216037	-	1477	protein_coding	caspase recruitment domain family, member 19 [Source:MGI Symbol;Acc:MGI:1915730]	-	157	328	263	271	429	384	279	15.2044	26.85	24.2178	21.4193	33.3662	32.7629	22.3805
ENSMUSG00000040936	202.848	157.825	159.493	192.874	219.93	272.733	287.422	-0.49607	0.000990487	0.00942925	Ulk4	9	120955351	121277197	-	8503	protein_coding	unc-51-like kinase 4 [Source:MGI Symbol;Acc:MGI:1921622]	-	176	171	161	215	230	260	284	4.43978	3.64624	3.86173	4.42643	4.65967	5.77834	5.9342
ENSMUSG00000023572	1640.07	1826.53	1585.03	1561.83	2623.86	2332.92	2129.35	-0.49582	4.85652e-07	1.30044e-05	Ccndbp1	2	121008403	121016904	+	3469	protein_coding	cyclin D-type binding-protein 1 [Source:MGI Symbol;Acc:MGI:109595]	-	1423	1979	1600	1741	2744	2224	2104	88.9985	104.622	95.1493	88.8674	137.829	122.544	108.998
ENSMUSG00000028630	3386.18	3018.99	2405.28	3120.98	4127.98	4067.92	4643.29	-0.495745	1.06153e-05	0.00020405	Dyrk2	10	118855603	118870209	-	6251	protein_coding	dual-specificity tyrosine-(Y)-phosphorylation regulated kinase 2 [Source:MGI Symbol;Acc:MGI:1330301]	-	2938	3271	2428	3479	4317	3878	4588	86.2796	81.1965	67.7974	83.3829	101.816	100.333	111.603
ENSMUSG00000102602	456.409	342.416	332.855	391.131	413.085	617.845	639.616	-0.495735	0.00143676	0.0126838	A930004J17Rik	4	131878628	131883237	+	4610	TEC	RIKEN cDNA A930004J17 gene [Source:MGI Symbol;Acc:MGI:2442442]	-	396	371	336	436	432	589	632	5.83985	4.62467	4.71144	5.24758	5.11646	7.65249	7.72002
ENSMUSG00000025171	855.19	1076.17	887.614	944.636	1542.38	1376.25	1142.6	-0.495441	3.44036e-05	0.000570032	Ubtd1	19	41981763	42034641	+	1527	protein_coding	ubiquitin domain containing 1 [Source:MGI Symbol;Acc:MGI:2385092]	-	742	1166	896	1053	1613	1312	1129	33.0348	43.8801	37.9301	38.2616	57.6742	51.4616	41.6349
ENSMUSG00000054659	167.119	142.135	120.858	140.843	201.762	227.627	194.314	-0.494648	0.00110634	0.0103452	Pm20d2	4	33174230	33189737	-	1834	protein_coding	peptidase M20 domain containing 2 [Source:MGI Symbol;Acc:MGI:2685270]	-	145	154	122	157	211	217	192	7.08168	6.35754	5.66547	6.25798	8.27617	9.33704	7.7672
ENSMUSG00000022543	214.374	188.283	153.549	158.785	257.222	264.341	256.049	-0.494313	0.000669337	0.00690843	4930451G09Rik	16	4964289	4978962	+	3444	transcribed_unitary_pseudogene	RIKEN cDNA 4930451G09 gene [Source:MGI Symbol;Acc:MGI:1921934]	-	186	204	155	177	269	252	253	10.7435	9.96005	8.51276	8.34392	12.4785	12.8237	12.1045
ENSMUSG00000042579	730.715	703.292	668.683	663.847	942.829	1083.59	932.098	-0.494009	3.43541e-07	9.55394e-06	4632404H12Rik	3	89767511	89773240	-	5730	lincRNA	RIKEN cDNA 4632404H12 gene [Source:MGI Symbol;Acc:MGI:1921284]	-	634	762	675	740	986	1033	921	11.5524	11.7365	11.6948	11.0047	14.4291	16.583	13.9007
ENSMUSG00000022999	927.8	1016.17	930.212	954.504	1300.45	1461.22	1325.79	-0.493957	1.78634e-08	6.47719e-07	Lmbr1l	15	98903917	98918231	-	4338	protein_coding	limb region 1 like [Source:MGI Symbol;Acc:MGI:1289247]	-	805	1101	939	1064	1360	1393	1310	50.6265	58.5288	56.1507	54.6122	68.691	77.1816	68.2414
ENSMUSG00000066798	737.63	675.603	623.113	696.142	902.668	945.125	1078.85	-0.493675	1.77682e-06	4.21316e-05	Zbtb6	2	37425500	37443171	-	5080	protein_coding	zinc finger and BTB domain containing 6 [Source:MGI Symbol;Acc:MGI:2442998]	ZBTB	640	732	629	776	944	901	1066	9.05323	8.75256	8.46023	8.95883	10.7244	11.2287	12.4904
ENSMUSG00000079083	449.493	400.563	423.994	405.485	647.358	624.139	530.314	-0.493544	8.7626e-06	0.000173338	Jrkl	9	13242607	13245829	-	3223	protein_coding	Jrk-like [Source:MGI Symbol;Acc:MGI:1924782]	-	390	434	428	452	677	595	524	8.22644	7.73815	8.58418	7.78129	11.4687	11.0572	9.15532
ENSMUSG00000041653	363.052	503.011	415.079	381.263	662.658	682.881	468.579	-0.492718	0.000887429	0.00864668	Pnpla3	15	84167837	84187236	+	1548	protein_coding	patatin-like phospholipase domain containing 3 [Source:MGI Symbol;Acc:MGI:2151796]	-	315	545	419	425	693	651	463	26.5037	38.7608	33.5211	29.1844	46.8283	48.2568	32.268
ENSMUSG00000028413	920.885	870.347	882.661	996.668	1255.51	1284.99	1375.38	-0.492648	4.25351e-08	1.45451e-06	B4galt1	4	40804602	40854005	-	4234	protein_coding	UDP-Gal:betaGlcNAc beta 1,4- galactosyltransferase, polypeptide 1 [Source:MGI Symbol;Acc:MGI:95705]	-	799	943	891	1111	1313	1225	1359	20.1332	20.0853	21.3477	22.8479	26.5711	27.1946	28.3648
ENSMUSG00000039046	2466.45	2084.96	1833.68	2175.44	3122.04	2982.23	3051.33	-0.492587	1.13953e-06	2.86009e-05	Usp6nl	2	6322667	6446390	+	8059	protein_coding	USP6 N-terminal like [Source:MGI Symbol;Acc:MGI:2138893]	-	2140	2259	1851	2425	3265	2843	3015	44.06	39.314	36.2364	40.7482	53.9874	51.569	51.4177
ENSMUSG00000097331	111.797	125.522	108.971	122.004	141.52	158.395	218.603	-0.491323	0.00425752	0.029184	F420014N23Rik	10	127195249	127202643	+	2552	lincRNA	RIKEN cDNA F420014N23 gene [Source:MGI Symbol;Acc:MGI:3642477]	-	97	136	110	136	148	151	216	4.31857	5.11809	4.6566	4.94167	5.29187	5.92279	7.96557
ENSMUSG00000096696	69.1528	104.294	85.1951	98.68	150.126	124.828	123.47	-0.490582	0.00619444	0.0389769	Zfp960	17	17064113	17089628	+	2667	protein_coding	zinc finger protein 960 [Source:MGI Symbol;Acc:MGI:3052731]	zf-C2H2	60	113	86	110	157	119	122	1.52945	2.4348	2.08445	2.28846	3.21413	2.67247	2.57596
ENSMUSG00000019970	4437.31	5408.52	4009.12	4399.33	7087.47	6729.16	5745.41	-0.490221	1.14848e-05	0.000218321	Sgk1	10	21882184	21999903	+	4903	protein_coding	serum/glucocorticoid regulated kinase 1 [Source:MGI Symbol;Acc:MGI:1340062]	-	3850	5860	4047	4904	7412	6415	5677	191.891	246.883	191.794	199.485	296.693	281.69	234.373
ENSMUSG00000042757	651.189	754.978	610.235	641.42	976.296	996.524	868.339	-0.488978	3.92882e-06	8.62378e-05	Tmem108	9	103482947	103761837	-	9930	protein_coding	transmembrane protein 108 [Source:MGI Symbol;Acc:MGI:1932411]	-	565	818	616	715	1021	950	858	14.7282	18.0241	15.2682	15.2115	21.3749	21.8175	18.526
ENSMUSG00000091971	326.171	356.261	321.958	343.586	505.838	437.422	499.953	-0.48885	1.11316e-05	0.000212727	Hspa1a	17	34969190	34972156	-	2967	protein_coding	heat shock protein 1A [Source:MGI Symbol;Acc:MGI:96244]	-	283	386	325	383	529	417	494	6.4845	7.47614	7.08078	7.16234	9.73474	8.41796	9.37587
ENSMUSG00000105076	518.646	602.69	580.516	554.402	708.556	947.223	766.122	-0.488108	3.66247e-05	0.000600218	A930003O13Rik	5	22738910	22746907	-	6639	lincRNA	RIKEN cDNA A930003O13 gene [Source:MGI Symbol;Acc:MGI:3612704]	-	450	653	586	618	741	903	757	11.5576	14.1764	14.3106	12.9541	15.2845	20.4325	16.1044
ENSMUSG00000086350	242.035	230.739	237.754	211.713	341.369	350.357	298.555	-0.487963	9.19598e-05	0.00130901	B230369F24Rik	1	178313328	178318549	-	2560	antisense	RIKEN cDNA B230369F24 gene [Source:MGI Symbol;Acc:MGI:2443392]	-	210	250	240	236	357	334	295	5.57682	5.61187	6.0602	5.115	7.61403	7.81439	6.4891
ENSMUSG00000023994	690.376	752.209	609.244	675.509	900.755	992.328	1016.1	-0.487491	1.91724e-06	4.51641e-05	Nfya	17	48386885	48409906	-	7315	protein_coding	nuclear transcription factor-Y alpha [Source:MGI Symbol;Acc:MGI:97316]	NF-YA	599	815	615	753	942	946	1004	24.6803	28.3845	24.0939	25.3212	31.1712	34.3396	34.2651
ENSMUSG00000021265	198.238	266.734	254.595	211.713	339.457	311.545	356.242	-0.487409	0.000386523	0.00440021	Slc25a29	12	108825873	108835883	-	2606	protein_coding	solute carrier family 25 (mitochondrial carrier, palmitoylcarnitine transporter), member 29 [Source:MGI Symbol;Acc:MGI:2444911]	-	172	289	257	236	355	297	352	10.9283	15.5211	15.5262	12.2378	18.1147	16.625	18.5251
ENSMUSG00000050132	2132.21	1634.55	1555.31	1913.49	2248.06	2528.02	2997.69	-0.487025	0.000108249	0.00150138	Sarm1	11	78472330	78497754	-	5629	protein_coding	sterile alpha and HEAT/Armadillo motif containing 1 [Source:MGI Symbol;Acc:MGI:2136419]	-	1850	1771	1570	2133	2351	2410	2962	48.9952	39.6461	39.5357	46.104	50.005	56.2315	64.9773
ENSMUSG00000097589	132.543	123.676	118.877	130.975	169.25	179.374	200.386	-0.48618	0.00102363	0.00970884	Dleu2	14	61602839	61682373	-	11334	processed_transcript	deleted in lymphocytic leukemia, 2 [Source:MGI Symbol;Acc:MGI:1934030]	-	115	134	120	146	177	171	198	5.52131	5.43813	5.47814	5.72088	6.8249	7.23305	7.87416
ENSMUSG00000030030	178.645	167.055	128.783	191.977	229.492	225.529	271.23	-0.485789	0.00184336	0.0153437	1700003E16Rik	6	83156404	83162945	+	2221	protein_coding	RIKEN cDNA 1700003E16 gene [Source:MGI Symbol;Acc:MGI:1919087]	-	155	181	130	214	240	215	268	5.15283	5.0862	4.10928	5.80623	6.40773	6.297	7.37979
ENSMUSG00000029056	1470.65	1986.2	1750.46	1565.42	2499.55	2676.98	2078.75	-0.485511	5.01232e-05	0.000783408	Pank4	4	154964123	154980938	+	3487	protein_coding	pantothenate kinase 4 [Source:MGI Symbol;Acc:MGI:2387466]	-	1276	2152	1767	1745	2614	2552	2054	51.2693	73.0886	67.5074	57.2227	84.3513	90.3377	68.3601
ENSMUSG00000003269	1077.63	1422.27	1121.41	1049.6	1849.32	1673.11	1482.65	-0.485355	6.13167e-05	0.000928562	Cyth2	7	45806637	45814581	-	3445	protein_coding	cytohesin 2 [Source:MGI Symbol;Acc:MGI:1334255]	-	935	1541	1132	1170	1934	1595	1465	45.5012	63.389	52.38	46.469	75.5869	68.3837	59.0532
ENSMUSG00000034105	942.783	1009.71	922.287	862.104	1341.57	1354.22	1267.09	-0.484971	5.53163e-08	1.86328e-06	Tldc1	8	119760076	119778416	-	4132	protein_coding	TBC/LysM associated domain containing 1 [Source:MGI Symbol;Acc:MGI:1921597]	-	818	1094	931	961	1403	1291	1252	33.9921	38.4275	36.7859	32.5922	46.8232	47.2641	43.0947
ENSMUSG00000038145	2625.5	2456.91	2019.92	2620.4	3374.49	3425.95	3537.12	-0.484235	1.51333e-06	3.64596e-05	Snrk	9	122117266	122169702	+	5780	protein_coding	SNF related kinase [Source:MGI Symbol;Acc:MGI:108104]	-	2278	2662	2039	2921	3529	3266	3495	110.937	109.58	94.4163	116.097	138.023	140.126	140.982
ENSMUSG00000026933	5936.77	4719.07	4155.74	5162.76	6602.67	6868.68	7867.68	-0.484025	3.16956e-05	0.000532326	Camsap1	2	25926838	25983282	-	8368	protein_coding	calmodulin regulated spectrin-associated protein 1 [Source:MGI Symbol;Acc:MGI:3036242]	-	5151	5113	4195	5755	6905	6548	7774	124.933	104.824	96.744	113.919	134.501	139.918	156.179
ENSMUSG00000025245	920.885	859.272	898.512	881.84	1147.46	1291.29	1333.88	-0.48349	7.9356e-08	2.61439e-06	Lztfl1	9	123694416	123717697	-	11152	protein_coding	leucine zipper transcription factor-like 1 [Source:MGI Symbol;Acc:MGI:1934860]	-	799	931	907	983	1200	1231	1318	25.4423	25.0588	27.4615	25.5464	30.6881	34.5341	34.7632
ENSMUSG00000103041	146.373	189.206	179.306	209.022	253.397	295.81	237.832	-0.483477	0.00124243	0.0113596	Gm37305	3	65957758	65962036	+	4279	antisense	predicted gene, 37305 [Source:MGI Symbol;Acc:MGI:5610533]	-	127	205	181	233	265	282	235	2.01776	2.75308	2.73433	3.02125	3.38135	3.94726	3.09263
ENSMUSG00000030657	1755.33	1653.01	1449.31	1721.52	2097.94	2386.41	2502.8	-0.483294	1.01157e-06	2.55672e-05	Xylt1	7	117380979	117673580	+	9651	protein_coding	xylosyltransferase 1 [Source:MGI Symbol;Acc:MGI:2451073]	-	1523	1791	1463	1919	2194	2275	2473	25.9433	25.7882	23.6962	26.6788	30.0152	34.1419	34.8935
ENSMUSG00000074909	1311.6	1355.82	1182.83	1380.62	1792.9	1939.55	1807.52	-0.483177	3.27009e-08	1.15323e-06	Ranbp6	19	29808400	29812974	-	4575	protein_coding	RAN binding protein 6 [Source:MGI Symbol;Acc:MGI:2683212]	-	1138	1469	1194	1539	1875	1849	1786	16.9106	18.4518	16.8705	18.6647	22.3767	24.2066	21.9833
ENSMUSG00000015846	925.495	959.874	834.12	906.958	1374.08	1216.81	1251.91	-0.483018	1.52332e-07	4.70064e-06	Rxra	2	27676440	27762957	+	5462	protein_coding	retinoid X receptor alpha [Source:MGI Symbol;Acc:MGI:98214]	RXR-like	803	1040	842	1011	1437	1160	1237	24.5134	26.8362	24.4403	25.1886	35.2308	31.198	31.2789
ENSMUSG00000039715	396.476	469.784	378.425	417.147	700.906	534.976	543.471	-0.480565	0.000181241	0.00232798	Wdr34	2	30031546	30048881	-	2359	protein_coding	WD repeat domain 34 [Source:MGI Symbol;Acc:MGI:1919070]	-	344	509	382	465	733	510	537	29.9061	37.4041	31.5771	32.9928	51.178	39.0618	38.6696
ENSMUSG00000042961	2820.28	2688.57	2458.77	3010.64	3758.88	3688.19	4167.62	-0.480511	1.72377e-07	5.25619e-06	Egflam	15	7206120	7398395	-	6121	protein_coding	EGF-like, fibronectin type III and laminin G domains [Source:MGI Symbol;Acc:MGI:2146149]	-	2447	2913	2482	3356	3931	3516	4118	63.0618	63.4561	60.8194	70.5863	81.3607	79.8294	87.9051
ENSMUSG00000046792	822.919	909.111	714.252	806.484	1240.21	1127.65	1083.91	-0.479879	4.48292e-06	9.65194e-05	Zfp787	7	6131491	6155997	-	5443	protein_coding	zinc finger protein 787 [Source:MGI Symbol;Acc:MGI:1914359]	zf-C2H2	714	985	721	899	1297	1075	1071	43.5342	50.7656	41.7999	44.7361	63.5114	57.746	54.09
ENSMUSG00000038370	1092.61	1393.66	1336.37	1105.22	1890.44	1729.76	1620.29	-0.479828	1.49767e-05	0.000274842	Pcp4l1	1	171173262	171196268	-	1577	protein_coding	Purkinje cell protein 4-like 1 [Source:MGI Symbol;Acc:MGI:1913675]	-	948	1510	1349	1232	1977	1649	1601	40.8681	55.0241	55.2962	43.3463	68.4481	62.6293	57.1692
ENSMUSG00000051224	144.068	155.057	135.718	122.901	209.411	204.55	187.229	-0.479636	0.00106657	0.0100369	Tceanc	X	166499812	166518567	-	4201	protein_coding	transcription elongation factor A (SII) N-terminal and central domain containing [Source:MGI Symbol;Acc:MGI:2685236]	-	125	168	137	137	219	195	185	4.50107	5.11346	4.69066	4.02617	6.33328	6.18616	5.51788
ENSMUSG00000061371	210.916	150.442	191.194	166.859	217.061	281.125	279.326	-0.478629	0.00197732	0.0161969	Zfp873	10	82048123	82064745	+	3179	protein_coding	zinc finger protein 873 [Source:MGI Symbol;Acc:MGI:3040689]	zf-C2H2	183	163	193	186	227	268	276	5.92151	4.4583	5.93809	4.91202	5.89911	7.64007	7.39751
ENSMUSG00000052812	2215.2	2142.18	1637.53	1924.26	2598.99	2869.99	2932.92	-0.477725	1.26987e-05	0.000237636	Atad2b	12	4917353	5047394	+	15110	protein_coding	ATPase family, AAA domain containing 2B [Source:MGI Symbol;Acc:MGI:2444798]	-	1922	2321	1653	2145	2718	2736	2898	34.2684	34.9797	28.0234	31.2129	38.9197	42.9772	42.799
ENSMUSG00000047888	7037.45	6108.12	5463.39	6478.79	7577.05	8600.53	10503.1	-0.47717	4.87069e-05	0.000765255	Tnrc6b	15	80711313	80941085	+	23677	protein_coding	trinucleotide repeat containing 6b [Source:MGI Symbol;Acc:MGI:2443730]	-	6106	6618	5515	7222	7924	8199	10378	110.696	101.415	95.067	106.856	115.372	130.954	155.842
ENSMUSG00000021013	1490.24	1538.57	1328.45	1471.23	2121.84	2061.23	1957.31	-0.477147	1.68437e-08	6.11977e-07	Ttc8	12	98920574	98983238	+	3782	protein_coding	tetratricopeptide repeat domain 8 [Source:MGI Symbol;Acc:MGI:1923510]	-	1293	1667	1341	1640	2219	1965	1934	83.7974	91.3204	82.6359	86.7445	115.496	112.196	103.821
ENSMUSG00000030659	501.358	423.637	384.369	439.574	566.08	574.837	724.628	-0.477125	0.000184216	0.00236114	Nucb2	7	116504369	116540584	+	2331	protein_coding	nucleobindin 2 [Source:MGI Symbol;Acc:MGI:1858179]	-	435	459	388	490	592	548	716	26.3575	23.5087	22.3539	24.2313	28.8081	29.2534	35.9354
ENSMUSG00000024666	320.408	305.498	273.417	270.921	471.414	425.883	352.194	-0.476821	0.000291957	0.00346827	Tmem138	19	10570478	10577362	-	1590	protein_coding	transmembrane protein 138 [Source:MGI Symbol;Acc:MGI:1920232]	-	278	331	276	302	493	406	348	11.8865	11.963	11.2209	10.5386	16.9292	15.2939	12.3249
ENSMUSG00000062859	331.934	311.959	215.96	255.671	422.647	335.671	446.314	-0.476654	0.00213546	0.0172493	Tcp11	17	28066745	28080639	-	3841	protein_coding	t-complex protein 11 [Source:MGI Symbol;Acc:MGI:98544]	-	288	338	218	285	442	320	441	13.0704	12.9662	9.40719	10.5562	16.11	12.7946	16.5779
ENSMUSG00000117113	541.697	473.476	387.341	429.706	537.393	678.686	743.857	-0.474108	0.000645073	0.00671569	CT010445.1	17	74186768	74190499	-	3732	TEC	novel transcript	-	470	513	391	479	562	647	735	8.56177	7.89921	6.77252	7.12143	8.22207	10.3837	11.0904
ENSMUSG00000097140	100.272	93.2185	89.1577	82.5323	114.746	148.954	133.591	-0.473856	0.00524324	0.0344095	Gm26779	5	109886231	109891137	+	551	lincRNA	predicted gene, 26779 [Source:MGI Symbol;Acc:MGI:5477273]	-	87	101	90	92	120	142	132	10.7343	10.5336	10.5586	9.26424	11.8909	15.4357	13.4904
ENSMUSG00000010362	162.509	238.123	227.847	181.212	278.259	316.79	278.314	-0.473845	0.00168472	0.0143074	Rdm1	11	101627195	101636100	+	1575	protein_coding	RAD52 motif 1 [Source:MGI Symbol;Acc:MGI:1913849]	-	141	258	230	202	291	302	275	12.6128	19.5081	19.5627	14.7473	20.9057	23.8003	20.3761
ENSMUSG00000025323	2240.55	1696.39	1662.3	2105.47	2513.89	2794.46	2859.04	-0.473785	4.28039e-05	0.000682628	Sp4	12	118234933	118301440	-	5770	protein_coding	trans-acting transcription factor 4 [Source:MGI Symbol;Acc:MGI:107595]	zf-C2H2	1944	1838	1678	2347	2629	2664	2825	45.3227	36.2215	37.198	44.658	49.2254	54.7186	54.5548
ENSMUSG00000051413	1109.9	974.641	883.652	1181.47	1282.29	1469.61	1654.7	-0.473179	9.41003e-05	0.00133139	Plagl2	2	153227759	153241426	-	5735	protein_coding	pleiomorphic adenoma gene-like 2 [Source:MGI Symbol;Acc:MGI:1933165]	zf-C2H2	963	1056	892	1317	1341	1401	1635	11.8431	10.9775	10.4307	13.2188	13.2449	15.1795	16.6553
ENSMUSG00000061731	879.393	928.493	682.552	778.675	1120.68	1154.92	1184.1	-0.473009	2.54752e-05	0.000441431	Ext1	15	53064038	53346159	-	8077	protein_coding	exostoses (multiple) 1 [Source:MGI Symbol;Acc:MGI:894663]	-	763	1006	689	868	1172	1101	1170	19.0286	21.207	16.3384	17.6672	23.4741	24.1908	24.1692
ENSMUSG00000040729	590.104	537.16	470.555	496.988	716.206	782.534	713.496	-0.472973	1.17512e-05	0.000222446	Cep126	9	8076461	8134294	-	4616	protein_coding	centrosomal protein 126 [Source:MGI Symbol;Acc:MGI:2680221]	-	512	582	475	554	749	746	705	19.7212	18.949	17.3966	17.4156	23.1699	25.3153	22.493
ENSMUSG00000045140	80.6783	67.3757	79.2513	73.5614	101.359	122.73	104.241	-0.471132	0.00785363	0.0461694	Pigw	11	84876315	84880285	-	2733	protein_coding	phosphatidylinositol glycan anchor biosynthesis, class W [Source:MGI Symbol;Acc:MGI:1917575]	-	70	73	80	82	106	117	103	2.16215	1.90595	2.34955	2.06713	2.62949	3.18386	2.63524
ENSMUSG00000107962	325.018	317.497	368.519	362.425	364.318	548.613	560.676	-0.470748	0.00139601	0.0124112	Gm43980	6	49254851	49256462	+	1612	TEC	predicted gene, 43980 [Source:MGI Symbol;Acc:MGI:5690372]	-	282	344	372	404	381	523	554	11.893	12.2631	14.9174	13.9056	12.9047	19.4323	19.3529
ENSMUSG00000032313	462.171	502.088	442.817	480.841	642.577	648.265	697.303	-0.470498	2.25754e-06	5.18505e-05	Tmem266	9	55326913	55438345	+	4714	protein_coding	transmembrane protein 266 [Source:MGI Symbol;Acc:MGI:2142980]	-	401	544	447	536	672	618	689	11.1272	12.7597	11.7939	12.1387	14.9758	15.1081	15.8364
ENSMUSG00000026707	116.407	107.063	126.802	117.519	170.206	177.276	154.844	-0.470177	0.00198358	0.0162261	Nsun6	2	14995131	15055069	-	5006	protein_coding	NOL1/NOP2/Sun domain family member 6 [Source:MGI Symbol;Acc:MGI:1921705]	-	101	116	128	131	178	169	153	3.36753	3.26925	4.05796	3.56474	4.76639	4.9643	4.22548
ENSMUSG00000028933	204.001	248.275	253.604	233.244	337.544	311.545	349.157	-0.469984	0.000204282	0.00258705	Xrcc2	5	25689812	25705825	-	5216	protein_coding	X-ray repair complementing defective repair in Chinese hamster cells 2 [Source:MGI Symbol;Acc:MGI:1927345]	-	177	269	256	260	353	297	345	7.59192	9.75284	10.4406	9.1016	12.1599	11.2232	12.2572
ENSMUSG00000068874	107.187	157.825	120.858	129.181	192.199	178.325	186.217	-0.46977	0.00314016	0.0233452	Selenbp1	3	94933056	94944758	+	2273	protein_coding	selenium binding protein 1 [Source:MGI Symbol;Acc:MGI:96825]	-	93	171	122	144	201	170	184	4.92025	7.64717	6.13722	6.21774	8.54042	7.92382	8.06338
ENSMUSG00000044712	266.238	290.731	261.529	282.584	336.588	429.03	403.808	-0.46968	0.000170803	0.00222006	Slc38a6	12	73286779	73354049	+	7783	protein_coding	solute carrier family 38, member 6 [Source:MGI Symbol;Acc:MGI:3648156]	-	231	315	264	315	352	409	399	9.52933	10.984	10.3553	10.6054	11.662	14.8646	13.6338
ENSMUSG00000005225	1741.5	1574.56	1434.45	1584.26	2077.86	2212.28	2356.05	-0.469224	3.41769e-07	9.51934e-06	Plekha8	6	54595111	54645839	+	7005	protein_coding	pleckstrin homology domain containing, family A (phosphoinositide binding specific) member 8 [Source:MGI Symbol;Acc:MGI:2681164]	-	1511	1706	1448	1766	2173	2109	2328	23.9562	22.8629	21.8288	22.8512	27.6689	29.4585	30.5725
ENSMUSG00000090622	318.103	407.946	282.333	278.995	488.626	501.409	389.639	-0.469072	0.00162479	0.0139422	A930033H14Rik	10	69209762	69213098	-	2969	protein_coding	RIKEN cDNA A930033H14 gene [Source:MGI Symbol;Acc:MGI:2444562]	-	276	442	285	311	511	478	385	6.31984	8.555	6.20512	5.81197	9.39717	9.64287	7.30219
ENSMUSG00000030265	2025.02	1985.28	1708.86	1853.39	2501.46	2790.27	2642.46	-0.468179	1.37029e-07	4.25759e-06	Kras	6	145216699	145250239	-	5347	protein_coding	Kirsten rat sarcoma viral oncogene homolog [Source:MGI Symbol;Acc:MGI:96680]	-	1757	2151	1725	2066	2616	2660	2611	89.7431	92.8689	83.7773	86.1243	107.311	119.699	110.467
ENSMUSG00000087368	84.1359	126.445	97.0828	119.313	143.432	177.276	145.735	-0.468014	0.00738156	0.0444002	BC065397	X	136741824	136803364	+	3515	processed_transcript	cDNA sequence BC065397 [Source:MGI Symbol;Acc:MGI:3584520]	-	73	137	98	133	150	169	144	5.01297	7.95231	6.39891	7.45401	8.27261	10.2245	8.19086
ENSMUSG00000026274	176.34	172.593	148.596	168.653	213.236	258.047	238.844	-0.467749	0.000816133	0.00808277	Pask	1	93308770	93343482	-	9060	protein_coding	PAS domain containing serine/threonine kinase [Source:MGI Symbol;Acc:MGI:2155936]	-	153	187	150	188	223	246	236	3.92216	4.05206	3.65623	3.93331	4.59111	5.55585	5.01119
ENSMUSG00000026655	749.156	886.96	674.627	709.599	1138.85	1022.75	1022.17	-0.467744	2.63082e-05	0.000454555	Fam107b	2	3570488	3782142	+	4329	protein_coding	family with sequence similarity 107, member B [Source:MGI Symbol;Acc:MGI:1913790]	-	650	961	681	791	1191	975	1010	36.6112	45.7535	36.4716	36.3616	53.8754	48.3822	47.1212
ENSMUSG00000093865	1088	1002.33	955.969	1038.83	1244.04	1452.83	1599.04	-0.467711	6.73905e-06	0.000137071	Lrit3	3	129787881	129804030	-	2739	protein_coding	leucine-rich repeat, immunoglobulin-like and transmembrane domains 3 [Source:MGI Symbol;Acc:MGI:2685267]	-	944	1086	965	1158	1301	1385	1580	39.204	38.1232	38.1061	39.2494	43.3925	50.6745	54.3514
ENSMUSG00000024424	1051.12	1015.25	928.231	1013.71	1504.13	1313.31	1379.42	-0.467179	2.31901e-07	6.79527e-06	Ttc39c	18	12599926	12737050	+	5197	protein_coding	tetratricopeptide repeat domain 39C [Source:MGI Symbol;Acc:MGI:1919997]	-	912	1100	937	1130	1573	1252	1363	30.0832	30.6706	29.3885	30.421	41.6713	36.3844	37.2409
ENSMUSG00000019718	114.102	141.212	139.68	153.402	222.798	203.501	164.964	-0.466536	0.00350665	0.0252571	L3hypdh	12	72073428	72085439	-	2679	protein_coding	L-3-hydroxyproline dehydratase (trans-) [Source:MGI Symbol;Acc:MGI:1914467]	-	99	153	141	171	233	194	163	4.40761	5.75785	5.96892	6.21342	8.33112	7.60941	6.01106
ENSMUSG00000071646	2405.37	2462.45	2022.89	2330.64	3296.08	3125.94	3219.33	-0.46537	1.34524e-07	4.19422e-06	Mta2	19	8941875	8952303	+	4093	protein_coding	metastasis-associated gene family, member 2 [Source:MGI Symbol;Acc:MGI:1346340]	zf-GATA	2087	2668	2042	2598	3447	2980	3181	124.897	134.963	116.196	126.892	165.672	157.118	157.684
ENSMUSG00000020907	11443.6	13147.5	11098.2	11179.5	17756.9	16530.8	14770.9	-0.465185	5.95579e-07	1.56914e-05	Rcvrn	11	67695326	67703333	+	1040	protein_coding	recoverin [Source:MGI Symbol;Acc:MGI:97883]	-	9929	14245	11203	12462	18570	15759	14595	649.052	787.113	696.332	664.856	974.911	907.578	790.266
ENSMUSG00000020648	126.78	126.445	101.045	113.033	165.425	182.521	152.82	-0.46396	0.00318579	0.0236288	Dus4l	12	31640050	31654826	-	1984	protein_coding	dihydrouridine synthase 4-like (S. cerevisiae) [Source:MGI Symbol;Acc:MGI:1919166]	-	110	137	102	126	173	174	151	9.13096	9.61268	8.05066	8.53611	11.5332	12.7249	10.3823
ENSMUSG00000025010	373.425	292.577	308.089	303.217	394.917	437.422	519.182	-0.463938	0.000496045	0.00540135	Ccnj	19	40831279	40848572	+	4355	protein_coding	cyclin J [Source:MGI Symbol;Acc:MGI:2443297]	-	324	317	311	338	413	417	513	5.8149	4.80903	5.3072	4.95085	5.95287	6.59348	7.62623
ENSMUSG00000029471	1250.51	1117.7	1172.92	1251.44	1580.62	1674.16	1746.8	-0.463737	6.03093e-08	2.01639e-06	Camkk2	5	122731170	122779409	-	10921	protein_coding	calcium/calmodulin-dependent protein kinase kinase 2, beta [Source:MGI Symbol;Acc:MGI:2444812]	-	1085	1211	1184	1395	1653	1596	1726	38.0613	35.9086	39.4924	39.9387	46.5699	49.3251	50.1521
ENSMUSG00000097855	132.543	127.368	149.587	170.447	221.842	204.55	193.302	-0.462223	0.00225811	0.0179862	A930007I19Rik	19	29486355	29523159	-	4341	lincRNA	RIKEN cDNA A930007I19 gene [Source:MGI Symbol;Acc:MGI:1925029]	-	115	138	151	190	232	195	191	4.21692	4.27737	5.26481	5.68614	6.83226	6.29961	5.80131
ENSMUSG00000028085	348.069	361.799	324.93	316.673	439.859	496.164	482.748	-0.462217	3.22463e-05	0.000539564	Gatb	3	85574119	85655622	+	4299	protein_coding	glutamyl-tRNA(Gln) amidotransferase, subunit B [Source:MGI Symbol;Acc:MGI:2442496]	-	302	392	328	353	460	473	477	10.8173	11.8686	11.171	10.3193	13.2327	14.9263	14.1522
ENSMUSG00000030527	840.207	803.894	718.215	817.249	1041.32	1107.72	1172.97	-0.462091	1.16179e-06	2.90787e-05	Crtc3	7	80586627	80688877	-	9850	protein_coding	CREB regulated transcription coactivator 3 [Source:MGI Symbol;Acc:MGI:1917711]	-	729	871	725	911	1089	1056	1159	24.8672	25.1142	23.5151	25.3621	29.8337	31.7355	32.7475
ENSMUSG00000110124	141.763	163.363	131.755	162.373	197.937	211.893	228.723	-0.461294	0.00154243	0.0134151	Gm4247	7	12793828	12794869	-	1042	processed_pseudogene	predicted gene 4247 [Source:MGI Symbol;Acc:MGI:3782424]	-	123	177	133	181	207	202	226	8.025	9.76143	8.25086	9.63794	10.8465	11.6111	12.2136
ENSMUSG00000025766	401.086	319.343	334.837	365.116	450.378	522.389	520.194	-0.461171	0.000119347	0.00163059	D3Ertd751e	3	41742611	41803320	+	5813	protein_coding	DNA segment, Chr 3, ERATO Doi 751, expressed [Source:MGI Symbol;Acc:MGI:1289213]	-	348	346	338	407	471	498	514	14.586	12.2584	13.4704	13.9225	15.8546	18.3894	17.8449
ENSMUSG00000050229	848.275	762.361	792.513	807.381	1041.32	1132.89	1172.97	-0.46109	3.19171e-07	8.93133e-06	Pigm	1	172376546	172384099	+	7554	protein_coding	phosphatidylinositol glycan anchor biosynthesis, class M [Source:MGI Symbol;Acc:MGI:1914806]	-	736	826	800	900	1089	1080	1159	6.62382	6.28364	6.84587	6.61057	7.87113	8.56319	8.6399
ENSMUSG00000031441	6396.64	5795.24	5438.62	6214.15	7116.16	8723.26	9092.26	-0.46082	5.09336e-06	0.000107858	Atp11a	8	12757014	12868728	+	11150	protein_coding	ATPase, class VI, type 11A [Source:MGI Symbol;Acc:MGI:1354735]	-	5550	6279	5490	6927	7442	8316	8984	135.821	129.887	127.748	138.352	146.266	179.296	182.113
ENSMUSG00000103103	116.407	124.599	106.989	104.062	155.863	183.57	144.723	-0.460637	0.00390188	0.0273394	4833445I07Rik	9	108567533	108569174	+	1642	lincRNA	RIKEN cDNA 4833445I07 gene [Source:MGI Symbol;Acc:MGI:2143268]	-	101	135	108	116	163	175	143	6.18594	6.98906	6.2895	5.7984	8.01772	9.44286	7.25463
ENSMUSG00000030051	123.323	155.057	135.718	139.946	212.28	180.423	197.35	-0.459867	0.00187921	0.0155702	Aplf	6	87628424	87672193	-	5925	protein_coding	aprataxin and PNKP like factor [Source:MGI Symbol;Acc:MGI:1919353]	-	107	168	137	156	222	172	195	2.85379	3.78745	3.47429	3.39569	4.75521	4.04154	4.30792
ENSMUSG00000086638	259.323	281.501	326.912	348.071	394.917	450.009	439.23	-0.459098	0.000394309	0.00447472	4930405A21Rik	2	156714540	156720909	-	1137	processed_transcript	RIKEN cDNA 4930405A21 gene [Source:MGI Symbol;Acc:MGI:1922096]	-	225	305	330	388	413	429	434	19.8913	22.7919	27.7398	27.9949	29.3231	33.4133	31.7809
ENSMUSG00000073147	907.054	1198.92	1100.6	925.797	1521.34	1468.56	1342.99	-0.459066	5.20176e-05	0.000806027	5031425E22Rik	5	23382308	23434269	-	5142	lincRNA	RIKEN cDNA 5031425E22 gene [Source:MGI Symbol;Acc:MGI:1923227]	-	787	1299	1111	1032	1591	1400	1327	37.5991	52.4581	50.469	40.2391	61.0452	58.9266	52.5132
ENSMUSG00000025199	855.19	931.262	885.633	836.985	1033.67	1352.13	1286.32	-0.458524	2.25652e-05	0.000397117	Chuk	19	44073335	44107480	-	5087	protein_coding	conserved helix-loop-helix ubiquitous kinase [Source:MGI Symbol;Acc:MGI:99484]	-	742	1009	894	933	1081	1289	1271	31.6463	36.3756	36.2547	32.4763	37.0274	48.4343	44.9014
ENSMUSG00000022237	8906.88	8333.36	6227.17	7846.85	11241.3	10613.5	10901.8	-0.457626	3.55552e-05	0.000586281	Ankrd33b	15	31291478	31367726	-	8761	protein_coding	ankyrin repeat domain 33B [Source:MGI Symbol;Acc:MGI:1917904]	-	7728	9029	6286	8747	11756	10118	10772	161.407	159.403	124.836	149.101	197.195	186.18	186.358
ENSMUSG00000041343	225.899	254.736	230.819	244.906	307.901	337.769	360.29	-0.457615	0.000191687	0.00244498	Ankrd42	7	92581723	92637142	-	5099	protein_coding	ankyrin repeat domain 42 [Source:MGI Symbol;Acc:MGI:1921095]	-	196	276	233	273	322	322	356	6.30018	7.49906	7.12133	7.16186	8.3125	9.11872	9.47855
ENSMUSG00000001053	139.458	151.365	136.708	154.3	187.418	218.186	211.519	-0.457447	0.00131084	0.0118036	N4bp3	11	51643063	51650842	-	2728	protein_coding	NEDD4 binding protein 3 [Source:MGI Symbol;Acc:MGI:2442218]	-	121	164	138	172	196	208	209	6.28905	7.20517	6.82004	7.29616	8.18153	9.52454	8.99789
ENSMUSG00000028952	224.747	267.657	292.239	320.261	338.5	396.512	437.206	-0.457355	0.00130287	0.0117631	Zbtb48	4	152019774	152027671	-	3199	protein_coding	zinc finger and BTB domain containing 48 [Source:MGI Symbol;Acc:MGI:2140248]	ZBTB	195	290	295	357	354	378	432	10.5549	13.2683	15.1827	15.7707	15.3886	18.0256	19.3685
ENSMUSG00000044700	1637.77	1695.47	1539.46	1566.32	2122.8	2319.28	2239.67	-0.457326	8.23986e-09	3.17967e-07	Tmem201	4	149715375	149738044	-	8944	protein_coding	transmembrane protein 201 [Source:MGI Symbol;Acc:MGI:1196277]	-	1421	1837	1554	1746	2220	2211	2213	32.4615	35.4719	33.7546	32.5525	40.7292	44.4984	41.8746
ENSMUSG00000039117	821.766	996.792	780.625	887.222	1227.78	1218.91	1192.2	-0.457304	6.73766e-06	0.000137071	Taf4	2	179912152	179976646	-	4621	protein_coding	TATA-box binding protein associated factor 4 [Source:MGI Symbol;Acc:MGI:2152346]	-	713	1080	788	989	1284	1162	1178	19.9476	25.5403	20.9621	22.5821	28.85	28.641	27.2987
ENSMUSG00000035126	1310.45	1394.59	1328.45	1365.37	1629.39	1935.36	2055.47	-0.455912	2.25862e-06	5.18505e-05	Wdr78	4	103038065	103114555	-	7307	protein_coding	WD repeat domain 78 [Source:MGI Symbol;Acc:MGI:2385328]	-	1137	1511	1341	1522	1704	1845	2031	26.8582	30.1704	30.1199	29.3425	32.327	38.3967	39.7394
ENSMUSG00000040712	2072.28	1945.59	1836.65	1956.55	2681.23	2780.83	2628.3	-0.455768	3.01469e-09	1.26484e-07	Camta2	11	70669463	70688105	-	5207	protein_coding	calmodulin binding transcription activator 2 [Source:MGI Symbol;Acc:MGI:2135957]	CG-1	1798	2108	1854	2181	2804	2651	2597	30.5818	30.3071	29.9841	30.2758	38.3028	39.725	36.5881
ENSMUSG00000029007	726.105	841.735	752.887	804.69	1070.01	1081.49	1098.07	-0.455618	4.42188e-07	1.1983e-05	Agtrap	4	148077061	148088031	-	4236	protein_coding	angiotensin II, type I receptor-associated protein [Source:MGI Symbol;Acc:MGI:1339977]	-	630	912	760	897	1119	1031	1085	26.7186	32.6941	30.6475	31.0479	38.1139	38.5224	38.1152
ENSMUSG00000003134	2267.06	2288.93	2024.87	2109.06	2983.39	3081.88	2933.93	-0.454896	7.35293e-09	2.85576e-07	Tbc1d8	1	39371492	39478755	-	5239	protein_coding	TBC1 domain family, member 8 [Source:MGI Symbol;Acc:MGI:1927225]	-	1967	2480	2044	2351	3120	2938	2899	53.4258	56.9375	52.788	52.1153	68.0581	70.3039	65.2213
ENSMUSG00000033644	116.407	119.061	85.1951	93.2974	152.038	130.073	161.928	-0.454839	0.00830849	0.0481718	Piwil2	14	70372477	70429383	-	5287	protein_coding	piwi-like RNA-mediated gene silencing 2 [Source:MGI Symbol;Acc:MGI:1930036]	-	101	129	86	104	159	124	160	3.14828	3.39893	2.54893	2.64576	3.98041	3.40529	4.13111
ENSMUSG00000071656	131.39	105.217	119.868	113.033	156.819	161.542	179.133	-0.453547	0.00333231	0.0243465	Lrrn4cl	19	8850785	8853909	+	2583	protein_coding	LRRN4 C-terminal like [Source:MGI Symbol;Acc:MGI:1916102]	-	114	114	121	126	164	154	177	3.00046	2.53623	3.02814	2.70657	3.46662	3.57096	3.85879
ENSMUSG00000063681	7838.47	6493.91	5576.32	6744.33	8865.08	9187.95	9712.65	-0.453476	2.29404e-05	0.000403267	Crb1	1	139197056	139377100	-	14432	protein_coding	crumbs family member 1, photoreceptor morphogenesis associated [Source:MGI Symbol;Acc:MGI:2136343]	-	6801	7036	5629	7518	9271	8759	9597	135.749	118.71	106.832	122.47	148.617	154.028	158.669
ENSMUSG00000100455	201.696	208.588	174.353	226.067	254.353	267.488	336.001	-0.453337	0.00186608	0.0154802	Gm29170	1	143777642	143781307	+	3666	sense_intronic	predicted gene 29170 [Source:MGI Symbol;Acc:MGI:5579876]	-	175	226	176	252	266	255	332	3.24529	3.54261	3.10338	3.81401	3.96164	4.16616	5.09974
ENSMUSG00000023495	6806.94	9152.03	7456.56	7085.22	11644.8	10960.7	9243.06	-0.453224	7.88756e-05	0.0011463	Pcbp4	9	106453291	106464012	+	4268	protein_coding	poly(rC) binding protein 4 [Source:MGI Symbol;Acc:MGI:1890471]	-	5906	9916	7527	7898	12178	10449	9133	598.382	849.223	725.128	653.083	990.923	932.697	766.467
ENSMUSG00000001524	147.526	210.434	205.063	174.933	271.565	279.027	232.772	-0.452998	0.0026271	0.020258	Gtf2h4	17	35667730	35673739	-	3313	protein_coding	general transcription factor II H, polypeptide 4 [Source:MGI Symbol;Acc:MGI:1338799]	-	128	228	207	195	284	266	230	9.97932	15.0254	15.3451	12.4077	17.7823	18.2706	14.853
ENSMUSG00000032120	6132.7	6628.67	5674.39	5825.71	8954.01	8393.88	7775.58	-0.452633	1.27973e-07	4.01078e-06	C2cd2l	9	44309237	44320285	-	5836	protein_coding	C2 calcium-dependent domain containing 2-like [Source:MGI Symbol;Acc:MGI:1919014]	-	5321	7182	5728	6494	9364	8002	7683	220.71	251.811	225.912	219.84	311.938	292.421	263.97
ENSMUSG00000040840	122.17	185.514	181.287	137.255	227.579	213.99	226.699	-0.452551	0.00502399	0.0333103	4930579G18Rik	14	54650511	54654607	+	968	antisense	RIKEN cDNA 4930579G18 gene [Source:MGI Symbol;Acc:MGI:1923163]	-	106	201	183	153	238	204	224	7.44454	11.9324	12.2206	8.7698	13.4242	12.6224	13.0309
ENSMUSG00000098374	123.323	145.827	155.531	151.608	182.637	184.619	246.94	-0.452534	0.00439936	0.0300079	Gm28043	17	29614876	29703359	+	6521	protein_coding	predicted gene, 28043 [Source:MGI Symbol;Acc:MGI:5547779]	-	107	158	157	169	191	176	244	1.11552	1.39236	1.55633	1.43796	1.59921	1.61654	2.10707
ENSMUSG00000070733	8289.12	6772.65	6126.12	7508.65	8804.84	10167.7	10944.3	-0.452292	5.60011e-05	0.000859622	Fryl	5	73019987	73256619	-	15192	protein_coding	FRY like transcription coactivator [Source:MGI Symbol;Acc:MGI:1919563]	-	7192	7338	6184	8370	9208	9693	10814	181.628	156.643	148.494	172.514	186.757	215.661	226.211
ENSMUSG00000029386	428.747	487.32	423.004	515.827	615.803	674.49	644.676	-0.452209	3.66372e-05	0.000600218	Tctn2	5	124598749	124627738	+	8318	processed_transcript	tectonic family member 2 [Source:MGI Symbol;Acc:MGI:1915228]	-	372	528	427	575	644	643	637	10.6664	12.7971	11.6416	13.4558	14.83	16.2431	15.129
ENSMUSG00000032258	1338.11	1383.51	1085.74	1369.86	1829.24	1763.32	1786.27	-0.452187	6.4366e-06	0.000132262	Lca5	9	83390293	83441127	-	6306	protein_coding	Leber congenital amaurosis 5 (human) [Source:MGI Symbol;Acc:MGI:1923032]	-	1161	1499	1096	1527	1913	1681	1765	56.8657	62.0612	51.043	61.0412	75.2509	72.5382	71.6073
ENSMUSG00000051278	310.035	255.659	242.707	250.288	301.208	389.169	425.061	-0.451177	0.00176427	0.01485	Zgrf1	3	127553489	127618023	+	10553	protein_coding	zinc finger, GRF-type containing 1 [Source:MGI Symbol;Acc:MGI:1918893]	-	269	277	245	279	315	371	420	3.45312	3.00566	2.99043	2.92301	3.2475	4.1958	4.46585
ENSMUSG00000097907	228.204	291.654	209.025	225.17	366.231	355.602	285.398	-0.450141	0.00216228	0.0174191	Raxos1	18	65937538	65940447	+	2547	lincRNA	retina and anterior neural fold homeobox, opposite strand 1 [Source:MGI Symbol;Acc:MGI:3583306]	-	198	316	211	251	383	339	282	5.28498	7.12961	5.35512	5.46787	8.21025	7.97185	6.2348
ENSMUSG00000024660	284.679	306.421	321.958	329.232	413.085	419.589	462.507	-0.44997	7.48515e-05	0.00110024	Incenp	19	9872297	9899533	-	3217	protein_coding	inner centromere protein [Source:MGI Symbol;Acc:MGI:1313288]	-	247	332	325	367	432	400	457	5.21979	5.93055	6.53052	6.32978	7.33194	7.44728	7.99959
ENSMUSG00000038312	424.137	678.372	615.188	433.295	903.624	801.415	591.037	-0.449787	0.00733567	0.0442481	Edem2	2	155701677	155729475	-	3463	protein_coding	ER degradation enhancer, mannosidase alpha-like 2 [Source:MGI Symbol;Acc:MGI:1915540]	-	368	735	621	483	945	764	584	21.586	36.4428	34.6357	23.1226	44.5179	39.4819	28.3747
ENSMUSG00000025077	212.069	181.822	190.203	208.125	246.704	285.321	298.555	-0.449739	0.000780665	0.00780708	Dclre1a	19	56529167	56548222	-	6384	protein_coding	DNA cross-link repair 1A [Source:MGI Symbol;Acc:MGI:1930042]	-	184	197	192	232	258	272	295	5.14777	4.65873	5.10752	5.29731	5.79695	6.70427	6.83625
ENSMUSG00000005609	1841.77	1501.65	1529.55	1719.72	1998.49	2282.57	2570.61	-0.449294	4.18261e-05	0.000671192	Ctr9	7	111028951	111056377	+	8000	protein_coding	CTR9 homolog, Paf1/RNA polymerase II complex component [Source:MGI Symbol;Acc:MGI:109345]	-	1598	1627	1544	1917	2090	2176	2540	70.4531	60.6333	64.7259	68.9781	74.0028	84.5207	92.7581
ENSMUSG00000020362	4885.65	4141.3	3893.22	4536.59	5768.85	5950.82	6330.38	-0.448307	1.48252e-06	3.58569e-05	Cnot6	11	49671503	49712723	-	6610	protein_coding	CCR4-NOT transcription complex, subunit 6 [Source:MGI Symbol;Acc:MGI:2144529]	-	4239	4487	3930	5057	6033	5673	6255	121.035	108.294	106.696	117.844	138.344	142.706	147.935
ENSMUSG00000038028	723.799	840.812	698.402	746.379	1086.26	1033.24	996.87	-0.448205	4.16505e-06	9.06502e-05	Tigar	6	127085116	127109557	-	3658	protein_coding	Trp53 induced glycolysis repulatory phosphatase [Source:MGI Symbol;Acc:MGI:2442752]	-	628	911	705	832	1136	985	985	18.9499	23.2362	20.2275	20.4897	27.5298	26.1857	24.6194
ENSMUSG00000022012	791.8	726.366	727.131	849.545	1054.71	1017.5	1130.46	-0.447993	3.70756e-06	8.17795e-05	Enox1	14	77156763	77721760	+	7962	protein_coding	ecto-NOX disulfide-thiol exchanger 1 [Source:MGI Symbol;Acc:MGI:2444896]	-	687	787	734	947	1103	970	1117	20.0193	19.3851	20.3375	22.5221	25.8135	24.9026	26.9613
ENSMUSG00000043068	137.153	196.59	149.587	152.505	230.448	222.382	219.615	-0.447883	0.00299355	0.0224872	Fam89a	8	124740257	124751832	-	1338	protein_coding	family with sequence similarity 89, member A [Source:MGI Symbol;Acc:MGI:1916877]	-	119	213	151	170	241	212	217	6.04642	9.14811	7.29518	7.04963	9.83439	9.49005	9.13284
ENSMUSG00000034867	1121.43	1021.71	1077.82	1177.88	1354	1614.37	1580.82	-0.446855	3.9272e-06	8.62378e-05	Ankrd27	7	35586244	35639226	+	6058	protein_coding	ankyrin repeat domain 27 (VPS9 domain) [Source:MGI Symbol;Acc:MGI:2444103]	-	973	1107	1088	1313	1416	1539	1562	37.8208	36.3719	40.2119	41.6532	44.2038	52.7032	50.2914
ENSMUSG00000020732	129.085	155.057	119.868	126.49	197.937	161.542	201.398	-0.446018	0.00441352	0.0300931	Rab37	11	115091431	115162236	+	5330	protein_coding	RAB37, member RAS oncogene family [Source:MGI Symbol;Acc:MGI:1929945]	-	112	168	121	141	207	154	199	3.75825	4.76516	3.86066	3.86147	5.5785	4.55271	5.53116
ENSMUSG00000027634	6461.18	7400.26	6142.97	6258.1	10287.9	8893.19	7993.17	-0.445498	1.60182e-05	0.00029158	Ndrg3	2	156927345	156992056	-	8388	protein_coding	N-myc downstream regulated gene 3 [Source:MGI Symbol;Acc:MGI:1352499]	-	5606	8018	6201	6976	10759	8478	7898	261.758	316.455	275.306	265.839	403.457	348.755	305.463
ENSMUSG00000031987	1890.18	1899.44	1656.35	1883.89	2390.54	2577.33	2580.73	-0.445225	1.21725e-07	3.82828e-06	Egln1	8	124908587	124949324	-	3594	protein_coding	egl-9 family hypoxia-inducible factor 1 [Source:MGI Symbol;Acc:MGI:1932286]	-	1640	2058	1672	2100	2500	2457	2550	31.0222	32.906	30.0728	32.4201	37.9794	40.9464	39.9544
ENSMUSG00000023072	435.663	430.097	424.985	439.574	523.05	619.943	649.736	-0.444316	4.75955e-05	0.000749754	Cep89	7	35397035	35438689	+	5087	protein_coding	centrosomal protein 89 [Source:MGI Symbol;Acc:MGI:1919390]	-	378	466	429	490	547	591	642	22.4633	23.4082	24.2408	23.7653	26.1064	30.9421	31.6018
ENSMUSG00000005951	101.424	96.9103	93.1203	94.1945	131.958	135.318	139.663	-0.443297	0.00521029	0.0342556	Shpk	11	73199460	73224511	+	2985	protein_coding	sedoheptulokinase [Source:MGI Symbol;Acc:MGI:1921887]	-	88	105	94	105	138	129	138	2.1125	2.13061	2.14561	2.05717	2.66055	2.72826	2.74403
ENSMUSG00000039307	859.8	1098.32	945.072	748.173	1418.07	1363.66	1035.33	-0.443181	0.0013113	0.0118036	Hexdc	11	121204433	121222655	+	4723	protein_coding	hexosaminidase (glycosyl hydrolase family 20, catalytic domain) containing [Source:MGI Symbol;Acc:MGI:3605542]	-	746	1190	954	834	1483	1300	1023	30.0273	40.4879	36.5119	27.3974	47.94	46.1001	34.1074
ENSMUSG00000020346	2320.08	2487.36	2144.74	2441.88	3019.73	3233.98	3410.61	-0.443083	2.40905e-07	7.01349e-06	Mgat1	11	49244191	49263030	+	4733	protein_coding	mannoside acetylglucosaminyltransferase 1 [Source:MGI Symbol;Acc:MGI:96973]	-	2013	2695	2165	2722	3158	3083	3370	114.043	129.058	116.625	125.858	143.687	153.88	158.143
ENSMUSG00000028910	366.51	418.099	388.331	397.411	581.379	555.956	488.82	-0.442846	5.88764e-05	0.000896125	Mecr	4	131843470	131867786	+	3041	protein_coding	mitochondrial trans-2-enoyl-CoA reductase [Source:MGI Symbol;Acc:MGI:1349441]	-	318	453	392	443	608	530	483	29.3337	35.3215	34.3822	33.3511	45.0425	43.0722	36.9047
ENSMUSG00000032782	328.476	337.802	405.172	383.955	475.239	533.927	500.965	-0.442364	0.000145519	0.00193392	Cntrob	11	69299487	69323775	-	6660	protein_coding	centrobin, centrosomal BRCA2 interacting protein [Source:MGI Symbol;Acc:MGI:2443290]	-	285	366	409	428	497	509	495	14.0708	15.2741	19.2002	17.2458	19.7065	22.1397	20.2429
ENSMUSG00000030283	4134.19	3635.52	3271.1	3670	4674.94	5312	5164.49	-0.442312	3.03327e-06	6.79882e-05	St8sia1	6	142821545	142964452	-	9341	protein_coding	ST8 alpha-N-acetyl-neuraminide alpha-2,8-sialyltransferase 1 [Source:MGI Symbol;Acc:MGI:106011]	-	3587	3939	3302	4091	4889	5064	5103	61.2403	56.845	53.6033	57.0035	67.0355	76.1695	72.165
ENSMUSG00000034379	343.459	432.866	343.752	304.114	599.547	563.299	347.133	-0.441611	0.00847701	0.0489071	Wdr5b	16	36041190	36043928	+	2739	protein_coding	WD repeat domain 5B [Source:MGI Symbol;Acc:MGI:1916794]	-	298	469	347	339	627	537	343	7.39659	9.83986	8.18941	6.86722	12.4986	11.7428	7.05187
ENSMUSG00000041975	119.865	145.827	161.475	134.564	196.98	187.766	205.446	-0.441011	0.00317042	0.0235314	Mettl8	2	70964561	71055583	-	5594	protein_coding	methyltransferase like 8 [Source:MGI Symbol;Acc:MGI:2385142]	-	104	158	163	150	206	179	203	4.71042	6.04901	7.01976	5.54478	7.4933	7.14268	7.61584
ENSMUSG00000030722	163.662	192.898	206.053	205.434	258.178	286.37	258.073	-0.440942	0.00111732	0.0104165	Nfatc2ip	7	126382854	126396737	-	3388	protein_coding	nuclear factor of activated T cells, cytoplasmic, calcineurin dependent 2 interacting protein [Source:MGI Symbol;Acc:MGI:1329015]	-	142	209	208	229	270	273	255	5.05167	6.28483	7.03587	6.64888	7.71417	8.55639	7.51418
ENSMUSG00000038569	231.662	169.824	219.922	194.669	266.784	283.223	300.579	-0.440876	0.00163108	0.0139662	Rad9b	5	122323223	122354233	-	4322	protein_coding	RAD9 checkpoint clamp component B [Source:MGI Symbol;Acc:MGI:2385231]	-	201	184	222	217	279	270	297	9.85206	7.62341	10.3465	8.68074	10.9828	11.6594	12.0582
ENSMUSG00000034121	346.917	503.011	440.835	385.749	586.16	611.551	548.531	-0.440829	0.000709991	0.00725326	Mks1	11	87853215	87863803	+	4044	protein_coding	Meckel syndrome, type 1 [Source:MGI Symbol;Acc:MGI:3584243]	-	301	545	445	430	613	583	542	13.7153	20.9911	19.28	15.9909	22.4325	23.4039	20.4566
ENSMUSG00000042743	1667.74	1467.5	1270	1438.93	2028.13	1951.09	2036.25	-0.440407	8.96849e-06	0.000176635	Sgtb	13	104109741	104141735	+	3072	protein_coding	small glutamine-rich tetratricopeptide repeat (TPR)-containing, beta [Source:MGI Symbol;Acc:MGI:2444615]	-	1447	1590	1282	1604	2121	1860	2012	62.3008	57.8659	52.4833	56.3632	73.3407	70.5536	71.7543
ENSMUSG00000035476	934.716	756.823	662.739	803.793	1011.68	1065.76	1192.2	-0.44017	0.000244568	0.00297613	Tab3	X	85574022	85634469	+	6639	protein_coding	TGF-beta activated kinase 1/MAP3K7 binding protein 3 [Source:MGI Symbol;Acc:MGI:1913974]	-	811	820	669	896	1058	1016	1178	28.2165	24.1156	22.1318	25.4423	29.5629	31.1428	33.9487
ENSMUSG00000039298	1195.19	1022.63	907.427	1135.72	1251.69	1496.88	1667.86	-0.44011	0.000306091	0.00360763	Cdk5rap2	4	70216856	70410443	-	13012	protein_coding	CDK5 regulatory subunit associated protein 2 [Source:MGI Symbol;Acc:MGI:2384875]	-	1037	1108	916	1266	1309	1427	1648	21.0698	19.0293	17.6964	20.9933	21.3599	25.5439	27.7353
ENSMUSG00000097204	84.1359	101.525	90.1483	85.2236	132.914	133.22	116.386	-0.439738	0.00852793	0.0490839	Gm17690	3	96167464	96172416	-	3469	antisense	predicted gene, 17690 [Source:MGI Symbol;Acc:MGI:4937324]	-	73	110	91	95	139	127	115	2.34983	2.993	2.78524	2.49576	3.59341	3.60162	3.06624
ENSMUSG00000029047	201.696	268.58	279.361	253.877	380.574	331.475	334.989	-0.439502	0.00125036	0.0114205	Pex10	4	155067016	155072433	+	3298	protein_coding	peroxisomal biogenesis factor 10 [Source:MGI Symbol;Acc:MGI:2684988]	-	175	291	282	283	398	316	331	9.86502	13.8661	15.1153	13.02	18.0186	15.6938	15.4555
ENSMUSG00000063229	13669.2	15856.4	13556.9	14889	20726	19795.2	18885.9	-0.43888	9.5048e-08	3.06964e-06	Ldha	7	46841475	46855627	+	3310	protein_coding	lactate dehydrogenase A [Source:MGI Symbol;Acc:MGI:96759]	-	11860	17180	13685	16597	21675	18871	18661	839.013	1027.32	920.527	958.252	1231.46	1176.14	1093.49
ENSMUSG00000047141	2163.33	1889.29	1696.97	1987.06	2550.23	2577.33	2824.63	-0.438829	6.29904e-06	0.000130327	Zfp654	16	64780347	64851652	-	6261	protein_coding	zinc finger protein 654 [Source:MGI Symbol;Acc:MGI:1919270]	zf-C2H2	1877	2047	1713	2215	2667	2457	2791	23.1969	21.3838	20.1294	22.3412	26.4708	26.7517	28.5707
ENSMUSG00000066152	1780.69	2210.48	1855.47	1993.34	2960.44	2842.72	2288.25	-0.438613	7.63801e-05	0.00111815	Slc31a2	4	62262562	62298411	+	2033	protein_coding	solute carrier family 31, member 2 [Source:MGI Symbol;Acc:MGI:1333844]	-	1545	2395	1873	2222	3096	2710	2261	91.8945	120.411	105.927	107.863	147.891	142.008	111.393
ENSMUSG00000039069	285.832	295.346	319.977	335.512	407.348	473.087	400.772	-0.438555	0.000241941	0.00295394	Mtg2	2	180070588	180085902	+	5949	protein_coding	mitochondrial ribosome associated GTPase 2 [Source:MGI Symbol;Acc:MGI:106565]	-	248	320	323	374	426	451	396	9.22828	10.0651	11.4282	11.3581	12.7308	14.7852	12.2056
ENSMUSG00000092118	103.729	119.061	117.886	113.033	139.608	186.717	152.82	-0.438455	0.00654597	0.0407338	Fancf	7	51860577	51862267	-	1691	protein_coding	Fanconi anemia, complementation group F [Source:MGI Symbol;Acc:MGI:3689889]	-	90	129	119	126	146	178	151	3.61831	4.38383	4.54903	4.13428	4.71407	6.30471	5.02847
ENSMUSG00000037336	240.882	240.891	239.735	252.98	300.252	343.014	366.362	-0.437738	0.000374353	0.00428332	Mfsd2b	12	4862440	4874359	-	5148	protein_coding	major facilitator superfamily domain containing 2B [Source:MGI Symbol;Acc:MGI:3583946]	-	209	261	242	282	314	327	362	6.05398	6.39051	6.66527	6.66668	7.30471	8.34494	8.68556
ENSMUSG00000040860	9863.5	10682.3	9809.33	9987.31	11844.6	14041.6	15547.1	-0.437501	5.90521e-06	0.000123598	Crocc	4	141016637	141060550	-	8266	protein_coding	ciliary rootlet coiled-coil, rootletin [Source:MGI Symbol;Acc:MGI:3529431]	-	8558	11574	9902	11133	12387	13386	15362	184.175	210.543	202.623	195.54	214.093	253.799	273.842
ENSMUSG00000029166	2650.86	3597.68	3121.51	2813.28	4695.98	4327.01	3575.57	-0.437397	0.000274852	0.0032911	Mapre3	5	30814641	30866106	+	3459	protein_coding	microtubule-associated protein, RP/EB family, member 3 [Source:MGI Symbol;Acc:MGI:2140967]	-	2300	3898	3151	3136	4911	4125	3533	112.169	160.689	146.117	124.821	192.351	177.235	142.719
ENSMUSG00000071984	585.494	599.921	390.313	435.986	738.199	692.322	666.941	-0.437271	0.00234855	0.0185141	Fndc1	17	7738569	7827302	-	9903	protein_coding	fibronectin type III domain containing 1 [Source:MGI Symbol;Acc:MGI:1915905]	-	508	650	394	486	772	660	659	14.6277	15.8207	10.7874	11.4213	17.8529	16.7431	15.7178
ENSMUSG00000036990	1985.84	1914.21	1729.66	1855.18	2304.48	2597.26	2774.03	-0.437032	2.09171e-06	4.87641e-05	Otud4	8	79639618	79677724	+	8096	protein_coding	OTU domain containing 4 [Source:MGI Symbol;Acc:MGI:1098801]	-	1723	2074	1746	2068	2410	2476	2741	40.3085	41.013	38.8386	39.4847	45.2801	51.0321	53.1148
ENSMUSG00000106864	519.799	622.995	677.599	536.46	777.403	812.954	840.002	-0.435972	0.000118969	0.00162687	Gtf3c2	5	31156005	31180144	-	6564	protein_coding	general transcription factor IIIC, polypeptide 2, beta [Source:MGI Symbol;Acc:MGI:1919002]	-	451	675	684	598	813	775	830	16.1884	20.4801	23.3449	17.5184	23.4367	24.5081	24.6775
ENSMUSG00000021796	2037.7	1867.14	1636.54	1935.02	2401.06	2552.15	2705.21	-0.434629	4.73436e-06	0.000101208	Bmpr1a	14	34410734	34503341	-	6351	protein_coding	bone morphogenetic protein receptor, type 1A [Source:MGI Symbol;Acc:MGI:1338938]	-	1768	2023	1652	2157	2511	2433	2673	51.764	50.0658	45.99	51.542	59.0433	62.7579	64.8245
ENSMUSG00000020806	161.357	195.667	149.587	192.874	288.777	230.774	213.543	-0.434511	0.00516659	0.0340678	Rhbdf2	11	116598165	116627019	-	5293	protein_coding	rhomboid 5 homolog 2 [Source:MGI Symbol;Acc:MGI:2442473]	-	140	212	151	215	302	220	211	3.54084	4.53226	3.63131	4.43795	6.13429	4.9021	4.42034
ENSMUSG00000034473	694.986	736.518	616.179	596.565	923.704	966.104	827.857	-0.434385	6.62842e-05	0.000991841	Sec22a	16	35311131	35363918	-	5223	protein_coding	SEC22 homolog A, vesicle trafficking protein [Source:MGI Symbol;Acc:MGI:2447876]	-	603	798	622	665	966	921	818	30.5929	34.222	30.0055	27.5353	39.3603	41.1664	34.3756
ENSMUSG00000028884	222.442	305.498	256.576	248.494	370.056	377.63	324.868	-0.433808	0.00124988	0.0114205	Rpa2	4	132768332	132778752	+	2993	protein_coding	replication protein A2 [Source:MGI Symbol;Acc:MGI:1339939]	-	193	331	259	277	387	360	321	16.5459	23.9863	21.1126	19.3812	26.6455	27.1905	22.7947
ENSMUSG00000033319	1444.14	1314.29	1218.49	1359.99	1772.82	1781.16	1898.61	-0.433679	6.80077e-07	1.76341e-05	Fem1c	18	46501746	46525971	-	5726	protein_coding	fem-1 homolog c (C.elegans) [Source:MGI Symbol;Acc:MGI:2444737]	-	1253	1424	1230	1516	1854	1698	1876	14.8767	14.2911	13.8857	14.69	17.6785	17.7613	18.4495
ENSMUSG00000075271	238.577	224.278	227.847	189.286	321.289	295.81	291.471	-0.433556	0.000844479	0.00830243	Ttc30a1	2	75978247	75981967	-	3721	protein_coding	tetratricopeptide repeat domain 30A1 [Source:MGI Symbol;Acc:MGI:1926052]	-	207	243	230	211	336	282	288	3.78197	3.75279	3.99561	3.14627	4.93022	4.53919	4.35848
ENSMUSG00000006567	495.595	411.638	343.752	388.44	590.941	569.592	531.326	-0.433299	0.000700288	0.00716225	Atp7b	8	21992785	22060305	-	6505	protein_coding	ATPase, Cu++ transporting, beta polypeptide [Source:MGI Symbol;Acc:MGI:103297]	-	430	446	347	433	618	543	525	5.54288	4.85962	4.25309	4.55534	6.39786	6.16664	5.60559
ENSMUSG00000046020	1146.78	1128.77	1062.96	1203.9	1488.83	1501.08	1645.59	-0.431635	5.99948e-07	1.57835e-05	Pofut1	2	153241533	153270247	+	9912	protein_coding	protein O-fucosyltransferase 1 [Source:MGI Symbol;Acc:MGI:2153207]	-	995	1223	1073	1342	1557	1431	1626	24.5622	25.5194	25.1855	27.0372	30.8682	31.1218	33.2475
ENSMUSG00000026456	668.477	944.183	835.11	725.746	1197.18	1159.12	925.014	-0.431363	0.00102197	0.00969823	Cyb5r1	1	134405559	134411740	+	4437	protein_coding	cytochrome b5 reductase 1 [Source:MGI Symbol;Acc:MGI:1919267]	-	580	1023	843	809	1252	1105	914	35.8136	53.3945	49.4943	40.7694	62.0874	60.1123	46.7478
ENSMUSG00000030649	117.56	157.825	170.39	122.004	193.156	219.235	184.193	-0.43131	0.00831331	0.0481718	Anapc15	7	101863715	101901849	+	5161	protein_coding	anaphase prompoting complex C subunit 15 [Source:MGI Symbol;Acc:MGI:1922680]	-	102	171	172	136	202	209	182	7.45632	10.5663	11.9553	8.1139	11.8592	13.4602	11.0202
ENSMUSG00000043639	593.562	742.979	516.124	570.55	874.937	850.717	773.207	-0.43106	0.000576232	0.00611199	Rbm20	19	53677306	53867080	+	6790	protein_coding	RNA binding motif protein 20 [Source:MGI Symbol;Acc:MGI:1920963]	-	515	805	521	636	915	811	764	9.82926	12.987	9.45495	9.90687	14.0253	13.6369	12.0782
ENSMUSG00000026930	2851.4	3329.1	2847.1	3091.37	4062.96	4252.54	4028.97	-0.429826	2.38087e-07	6.94267e-06	Gpsm1	2	26315515	26348237	+	5383	protein_coding	G-protein signalling modulator 1 (AGS3-like, C. elegans) [Source:MGI Symbol;Acc:MGI:1915089]	-	2474	3607	2874	3446	4249	4054	3981	108.792	134.074	120.169	123.674	150.06	157.059	145.006
ENSMUSG00000032599	2250.92	2467.98	2169.5	2512.75	3354.41	3184.68	3036.15	-0.429121	5.09814e-07	1.35358e-05	Ip6k2	9	108783796	108806337	+	4067	protein_coding	inositol hexaphosphate kinase 2 [Source:MGI Symbol;Acc:MGI:1923750]	-	1953	2674	2190	2801	3508	3036	3000	120.703	139.694	128.697	141.284	174.122	165.309	153.579
ENSMUSG00000046404	622.375	497.473	490.367	595.668	616.759	742.673	924.002	-0.429062	0.00223315	0.0178702	Yod1	1	130717327	130724358	+	6128	protein_coding	YOD1 deubiquitinase [Source:MGI Symbol;Acc:MGI:2442596]	-	540	539	495	664	645	708	913	5.99077	5.0545	5.22158	6.01205	5.74682	6.91995	8.38985
ENSMUSG00000037062	2277.43	2102.49	1914.91	2144.05	2757.73	2965.45	2866.13	-0.429054	3.47979e-07	9.66244e-06	Sh3glb1	3	144683678	144720335	-	7467	protein_coding	SH3-domain GRB2-like B1 (endophilin) [Source:MGI Symbol;Acc:MGI:1859730]	-	1976	2278	1933	2390	2884	2827	2832	53.2026	51.8442	49.4864	52.5182	62.362	67.0584	63.1589
ENSMUSG00000046157	1780.69	1723.16	1528.56	1663.21	2329.34	1985.71	2525.07	-0.428886	2.24593e-05	0.000395656	Tmem229b	12	78961795	79007627	-	4732	protein_coding	transmembrane protein 229B [Source:MGI Symbol;Acc:MGI:2444389]	-	1545	1867	1543	1854	2436	1893	2495	45.4502	46.425	43.16	44.5126	57.5524	49.0613	60.7957
ENSMUSG00000083718	152.136	150.442	160.484	188.389	208.455	240.215	227.711	-0.428509	0.00276423	0.0211436	Ccnb2-ps	8	71916556	71918851	-	2296	transcribed_processed_pseudogene	cyclin B2, pseudogene [Source:MGI Symbol;Acc:MGI:3779896]	-	132	163	162	210	218	229	225	6.15072	6.42008	7.17753	7.98615	8.15807	9.40089	8.6842
ENSMUSG00000026213	796.41	786.358	788.55	718.569	971.515	1204.22	980.677	-0.427103	4.76848e-05	0.000750504	Stk11ip	1	75521529	75537335	+	5743	protein_coding	serine/threonine kinase 11 interacting protein [Source:MGI Symbol;Acc:MGI:1918978]	-	691	852	796	801	1016	1148	969	22.8933	23.86	25.0756	21.6585	27.0335	33.5084	26.5919
ENSMUSG00000008167	360.747	454.094	402.2	415.353	617.715	580.082	480.724	-0.426994	0.000555453	0.00593462	Fbxw9	8	85060055	85067124	+	3383	protein_coding	F-box and WD-40 domain protein 9 [Source:MGI Symbol;Acc:MGI:1915878]	-	313	492	406	463	646	553	475	16.4444	21.8494	20.2818	19.8527	27.2574	25.5964	20.671
ENSMUSG00000025008	490.985	474.399	429.938	431.501	544.087	675.539	649.736	-0.426221	0.000181374	0.00232802	Tctn3	19	40596446	40612233	-	3273	protein_coding	tectonic family member 3 [Source:MGI Symbol;Acc:MGI:1914840]	-	426	514	434	481	569	644	642	18.1689	18.5303	17.6002	16.7429	19.4899	24.1984	22.6803
ENSMUSG00000017692	529.019	550.081	524.049	601.948	766.885	739.526	740.821	-0.42582	1.0296e-05	0.000199455	Rhbdl3	11	80300912	80355955	+	4734	protein_coding	rhomboid like 3 [Source:MGI Symbol;Acc:MGI:2179276]	-	459	596	529	671	802	705	732	17.6198	19.3391	19.3087	21.0222	24.7253	23.8429	23.2753
ENSMUSG00000029313	5041.24	4352.66	3541.54	4305.14	5489.64	5826	6305.07	-0.425438	0.000136343	0.0018268	Aff1	5	103692374	103855322	+	9458	protein_coding	AF4/FMR2 family, member 1 [Source:MGI Symbol;Acc:MGI:1100819]	AF-4	4374	4716	3575	4799	5741	5554	6230	68.5641	62.4874	53.2846	61.3953	72.2744	76.7017	80.8911
ENSMUSG00000015748	493.29	539.929	527.021	495.194	662.658	719.595	711.471	-0.42532	1.04216e-05	0.000201293	Prpf3	3	95830124	95855885	-	5661	protein_coding	pre-mRNA processing factor 3 [Source:MGI Symbol;Acc:MGI:1918017]	-	428	585	532	552	693	686	703	19.9296	23.0256	23.5545	20.9778	25.9159	28.1423	27.1147
ENSMUSG00000063488	342.306	326.726	314.033	348.968	462.808	481.479	416.965	-0.425183	0.000133985	0.00180063	Zkscan7	9	122885685	122898618	+	7253	protein_coding	zinc finger with KRAB and SCAN domains 7 [Source:MGI Symbol;Acc:MGI:3040678]	zf-C2H2	297	354	317	389	484	459	412	6.43034	6.47861	6.52597	6.87375	8.41593	8.75531	7.38873
ENSMUSG00000059273	2709.64	2730.1	2561.8	2803.41	3553.3	3527.7	3871.09	-0.425133	2.11031e-08	7.57566e-07	Zc3h4	7	16400910	16437696	+	9147	protein_coding	zinc finger CCCH-type containing 4 [Source:MGI Symbol;Acc:MGI:2682314]	-	2351	2958	2586	3125	3716	3363	3825	41.3319	43.9574	43.2285	44.8383	52.4672	52.0884	55.7006
ENSMUSG00000051427	994.648	1252.45	1154.1	1214.66	1512.73	1688.85	1505.93	-0.424961	2.71309e-05	0.000466978	Ccdc157	11	4141123	4160293	-	5589	protein_coding	coiled-coil domain containing 157 [Source:MGI Symbol;Acc:MGI:3041210]	-	863	1357	1165	1354	1582	1610	1488	22.3081	29.6505	28.6342	28.5651	32.8426	36.6656	31.8603
ENSMUSG00000086662	272.001	339.648	336.818	278.098	333.719	491.968	445.302	-0.424455	0.00392333	0.0274572	BC046251	7	65582070	65618884	+	3653	lincRNA	cDNA sequence BC046251 [Source:MGI Symbol;Acc:MGI:3039598]	-	236	368	340	310	349	469	440	4.39208	5.78903	6.01651	4.70853	5.21629	7.68974	6.78274
ENSMUSG00000026667	7680.57	6027.82	5264.27	6750.61	8168.95	8550.18	9607.4	-0.424376	0.000340673	0.00394301	Uhmk1	1	170193420	170215397	-	8101	protein_coding	U2AF homology motif (UHM) kinase 1 [Source:MGI Symbol;Acc:MGI:1341908]	-	6664	6531	5314	7525	8543	8151	9493	58.2996	48.2959	44.2038	53.7283	60.0233	62.8236	68.7906
ENSMUSG00000037857	1585.9	1426.89	1368.08	1424.58	1761.35	2117.88	2023.09	-0.424166	8.42202e-06	0.000167335	Nufip2	11	77686155	77741921	+	5792	protein_coding	nuclear fragile X mental retardation protein interacting protein 2 [Source:MGI Symbol;Acc:MGI:1915814]	-	1376	1546	1381	1588	1842	2019	1999	43.3084	41.1305	41.329	40.7916	46.561	55.9849	52.1148
ENSMUSG00000021684	1358.85	1147.23	1229.39	1308.86	1570.11	1754.93	1801.45	-0.424035	6.65601e-06	0.000135688	Pde8b	13	95024454	95250336	-	5879	protein_coding	phosphodiesterase 8B [Source:MGI Symbol;Acc:MGI:2443999]	-	1179	1243	1241	1459	1642	1673	1780	38.7214	34.5071	38.754	39.1074	43.3101	48.4077	48.423
ENSMUSG00000021932	131.39	155.057	142.652	138.152	204.63	179.374	202.41	-0.423792	0.00329316	0.0241539	Rnaseh2b	14	62292589	62372992	+	6243	protein_coding	ribonuclease H2, subunit B [Source:MGI Symbol;Acc:MGI:1914403]	-	114	168	144	154	214	171	200	4.15337	5.17375	4.98846	4.57913	6.26165	5.48874	6.0356
ENSMUSG00000062944	202.848	170.747	130.765	198.257	230.448	232.872	267.181	-0.423512	0.00785833	0.0461738	9130023H24Rik	7	128234458	128238031	-	3574	protein_coding	RIKEN cDNA 9130023H24 gene [Source:MGI Symbol;Acc:MGI:2442738]	zf-C2H2	176	185	132	221	241	222	264	3.34785	2.97458	2.38745	3.43092	3.6817	3.72038	4.1596
ENSMUSG00000021707	121.017	98.7562	109.961	123.798	155.863	173.081	142.699	-0.423374	0.0079932	0.0468288	Dhfr	13	92354726	92389053	+	5347	protein_coding	dihydrofolate reductase [Source:MGI Symbol;Acc:MGI:94890]	-	105	107	111	138	163	165	141	1.33502	1.14996	1.34192	1.432	1.66442	1.84826	1.48495
ENSMUSG00000040473	346.917	378.412	366.537	378.572	484.801	565.396	453.399	-0.423065	0.000229691	0.00284022	Cfap69	5	5579278	5664239	-	7905	protein_coding	cilia and flagella associated protein 69 [Source:MGI Symbol;Acc:MGI:2443778]	-	301	410	370	422	507	539	448	10.3506	11.9175	12.0979	11.8435	14.0019	16.3294	12.7607
ENSMUSG00000034621	2627.81	2353.54	2152.66	2421.25	2855.26	3306.36	3559.38	-0.422988	2.81287e-05	0.000481394	Gpatch8	11	102475915	102556392	-	8178	protein_coding	G patch domain containing 8 [Source:MGI Symbol;Acc:MGI:1918667]	-	2280	2550	2173	2699	2986	3152	3517	63.8401	60.3531	57.8531	61.6776	67.1471	77.7546	81.5692
ENSMUSG00000044749	266.238	187.36	193.175	206.331	275.39	280.076	323.856	-0.422537	0.00408124	0.0282769	Abca6	11	110176820	110251776	-	5398	protein_coding	ATP-binding cassette, sub-family A (ABC1), member 6 [Source:MGI Symbol;Acc:MGI:1923434]	-	231	203	195	230	288	267	320	4.66558	3.46569	3.74486	3.79129	4.67159	4.75101	5.35351
ENSMUSG00000030643	1046.51	958.951	876.717	934.768	1198.14	1350.03	1326.8	-0.422436	8.71352e-06	0.000172556	Rab30	7	92741603	92844535	+	9642	protein_coding	RAB30, member RAS oncogene family [Source:MGI Symbol;Acc:MGI:1923235]	-	908	1039	885	1042	1253	1287	1311	23.6784	22.9025	21.9441	22.1769	26.242	29.5683	28.3181
ENSMUSG00000019971	3185.64	2701.49	2467.69	2728.05	3102.92	3891.69	4335.62	-0.422249	0.000431715	0.00481134	Cep290	10	100487558	100574840	+	11617	protein_coding	centrosomal protein 290 [Source:MGI Symbol;Acc:MGI:2384917]	-	2764	2927	2491	3041	3245	3710	4284	54.3401	48.6414	46.5655	48.7938	51.2361	64.2595	69.7633
ENSMUSG00000015766	1206.72	941.415	948.044	1005.64	1354	1288.14	1536.29	-0.421867	0.000152302	0.00201367	Eps8	6	137477245	137654876	-	12355	protein_coding	epidermal growth factor receptor pathway substrate 8 [Source:MGI Symbol;Acc:MGI:104684]	-	1047	1020	957	1121	1416	1228	1518	36.8805	30.3704	32.0531	32.2271	40.0583	38.1092	44.2911
ENSMUSG00000029055	9953.4	10035.3	8807.79	9402.41	12033	13774.1	12861.1	-0.421843	2.47638e-07	7.17473e-06	Plch2	4	154983115	155056784	-	8112	protein_coding	phospholipase C, eta 2 [Source:MGI Symbol;Acc:MGI:2443078]	-	8636	10873	8891	10481	12584	13131	12708	174.735	185.959	171.051	173.076	204.487	234.071	212.981
ENSMUSG00000058440	803.325	691.294	571.6	740.1	983.946	938.831	939.183	-0.421183	0.000290441	0.00345253	Nrf1	6	30047988	30153458	+	10282	protein_coding	nuclear respiratory factor 1 [Source:MGI Symbol;Acc:MGI:1332235]	Nrf1	697	749	577	825	1029	895	928	25.5307	23.1906	20.0962	24.6632	30.2708	28.8824	28.1561
ENSMUSG00000029086	10458.2	9084.65	8037.07	9348.58	11723.2	12606.6	13122.2	-0.420219	1.25758e-05	0.000235947	Prom1	5	43993620	44102032	-	7175	protein_coding	prominin 1 [Source:MGI Symbol;Acc:MGI:1100886]	-	9074	9843	8113	10421	12260	12018	12966	280.531	257.223	238.491	262.941	304.405	327.337	332.034
ENSMUSG00000020547	1372.68	1569.02	982.716	1266.69	1971.72	1874.51	1493.79	-0.420172	0.00284702	0.0216756	Bzw2	12	36091835	36158080	-	5413	protein_coding	basic leucine zipper and W2 domains 2 [Source:MGI Symbol;Acc:MGI:1914162]	-	1191	1700	992	1412	2062	1787	1476	76.0988	91.8153	60.2678	73.632	105.812	100.594	78.1173
ENSMUSG00000032294	36840	34699.4	30138.3	35760.7	47575.6	44424	47052.2	-0.420072	8.94392e-07	2.27332e-05	Pkm	9	59656368	59679375	+	5001	protein_coding	pyruvate kinase, muscle [Source:MGI Symbol;Acc:MGI:97591]	-	31964	37596	30423	39863	49754	42350	46492	1977.29	1965.86	1789.45	2012.55	2471.82	2308.05	2382.23
ENSMUSG00000054715	231.662	250.121	237.754	208.125	323.201	308.398	315.76	-0.41996	0.000637983	0.00665726	Zscan22	7	12897815	12909083	+	3501	protein_coding	zinc finger and SCAN domain containing 22 [Source:MGI Symbol;Acc:MGI:2443312]	zf-C2H2	201	271	240	232	338	294	312	5.73669	6.53786	6.51306	5.40405	7.74749	7.39255	7.3759
ENSMUSG00000006464	1750.72	1623.48	1544.41	1675.77	2039.61	2236.41	2398.56	-0.419843	2.21284e-06	5.09292e-05	Bbs1	19	4886898	4906627	-	5581	protein_coding	Bardet-Biedl syndrome 1 (human) [Source:MGI Symbol;Acc:MGI:1277215]	-	1519	1759	1559	1868	2133	2132	2370	18.5035	18.1118	18.0572	18.5711	20.8672	22.8804	23.9133
ENSMUSG00000037594	306.577	388.564	289.267	374.087	499.145	437.422	456.435	-0.419552	0.00131271	0.0118104	Clba1	12	112808937	112816252	+	1960	protein_coding	clathrin binding box of aftiphilin containing 1 [Source:MGI Symbol;Acc:MGI:2443738]	-	266	421	292	417	522	417	451	11.4237	15.283	11.9239	14.616	18.0043	15.7777	16.0435
ENSMUSG00000061079	421.832	354.415	357.621	419.838	496.276	502.458	584.965	-0.4192	0.000421329	0.00471658	Zfp143	7	110061217	110095394	+	3484	protein_coding	zinc finger protein 143 [Source:MGI Symbol;Acc:MGI:1277969]	zf-C2H2	366	384	361	468	519	479	578	10.5077	9.31874	9.85464	10.9657	11.9666	12.1155	13.7451
ENSMUSG00000047246	220.136	204.896	188.222	199.154	246.704	302.104	283.374	-0.419095	0.00160316	0.0138299	Hist1h2be	13	23583670	23621124	-	4446	protein_coding	histone cluster 1, H2be [Source:MGI Symbol;Acc:MGI:2448380]	-	191	222	190	222	258	288	280	5.49977	5.40337	5.20203	5.21712	5.96637	7.30609	6.67828
ENSMUSG00000030469	427.595	450.402	438.854	433.295	559.386	581.131	635.568	-0.418904	3.17838e-05	0.000533311	Zfp719	7	43579610	43593235	+	4706	protein_coding	zinc finger protein 719 [Source:MGI Symbol;Acc:MGI:2444708]	zf-C2H2	371	488	443	483	585	554	628	13.3733	14.8691	15.1837	14.2095	16.9356	17.5937	18.7508
ENSMUSG00000063145	680.003	979.256	888.605	728.437	1177.1	1214.71	966.508	-0.418679	0.00168093	0.0143001	Bbs5	2	69647171	69667571	+	2445	protein_coding	Bardet-Biedl syndrome 5 (human) [Source:MGI Symbol;Acc:MGI:1919819]	-	590	1061	897	812	1231	1158	955	47.7507	72.5845	69.0285	53.6352	80.0138	82.5692	64.0216
ENSMUSG00000097960	782.579	537.16	548.815	687.171	877.806	737.428	1011.04	-0.418163	0.00366612	0.0261238	A330074K22Rik	8	120204434	120228230	-	2489	lincRNA	RIKEN cDNA A330074K22 gene [Source:MGI Symbol;Acc:MGI:3045392]	-	679	582	554	766	918	703	999	18.5461	13.4371	14.388	17.0757	20.1374	16.9168	22.6018
ENSMUSG00000053646	3001.23	2836.24	2561.8	2988.21	3525.57	3792.04	4205.07	-0.418062	6.64386e-06	0.000135652	Plxnb1	9	109095389	109119917	+	9592	protein_coding	plexin B1 [Source:MGI Symbol;Acc:MGI:2154238]	-	2604	3073	2586	3331	3687	3615	4155	96.2123	95.9738	90.8502	100.445	109.406	117.674	127.161
ENSMUSG00000008932	1996.21	2264.93	2063.51	2154.81	2710.87	3082.93	2774.03	-0.417838	8.5805e-07	2.19021e-05	Slc1a7	4	107968332	108013532	+	3360	protein_coding	solute carrier family 1 (glutamate transporter), member 7 [Source:MGI Symbol;Acc:MGI:2444087]	-	1732	2454	2083	2402	2835	2939	2741	48.1195	57.63	55.0263	54.4644	63.2565	71.9373	63.0779
ENSMUSG00000039765	1620.48	1480.42	1329.44	1392.28	1903.83	1945.84	2036.25	-0.417832	4.52265e-06	9.72585e-05	Cc2d2a	5	43662346	43740972	+	6809	protein_coding	coiled-coil and C2 domain containing 2A [Source:MGI Symbol;Acc:MGI:1924487]	-	1406	1604	1342	1552	1991	1855	2012	27.3806	26.4036	24.8495	24.6669	31.1392	31.826	32.4549
ENSMUSG00000032131	2052.69	2289.85	1977.32	1967.32	2807.45	2948.66	2615.14	-0.416986	2.14649e-06	4.97836e-05	Abcg4	9	44273188	44288615	-	5211	protein_coding	ATP binding cassette subfamily G member 4 [Source:MGI Symbol;Acc:MGI:1890594]	-	1781	2481	1996	2193	2936	2811	2584	75.2515	88.6092	80.1899	75.6234	99.6291	104.639	90.4355
ENSMUSG00000027361	586.646	561.157	547.825	498.782	762.104	752.114	705.399	-0.416838	2.58511e-05	0.000447515	Gabpb1	2	126627442	126676337	-	7752	protein_coding	GA repeat binding protein, beta 1 [Source:MGI Symbol;Acc:MGI:95611]	-	509	608	553	556	797	717	697	17.9667	18.1407	18.5603	16.0174	22.5938	22.2973	20.3788
ENSMUSG00000090071	3107.27	2974.69	2529.11	3293.22	3844.94	3787.84	4424.68	-0.415673	6.33627e-05	0.000954732	Cdk5r2	1	74854934	74857732	+	2799	protein_coding	cyclin-dependent kinase 5, regulatory subunit 2 (p39) [Source:MGI Symbol;Acc:MGI:1330828]	-	2696	3223	2553	3671	4021	3611	4372	65.4824	66.1706	58.9608	72.7704	78.4364	77.2704	87.9589
ENSMUSG00000030554	977.36	792.819	784.588	999.359	1074.79	1214.71	1323.76	-0.415205	0.00046718	0.00514297	Synm	7	67730160	67759742	-	7933	protein_coding	synemin, intermediate filament protein [Source:MGI Symbol;Acc:MGI:2661187]	-	848	859	792	1114	1124	1158	1308	11.3889	9.75167	10.1139	12.2106	12.1236	13.7017	14.5508
ENSMUSG00000014907	296.205	248.275	226.857	279.892	361.45	355.602	353.206	-0.415051	0.00103193	0.00976706	Naf1	8	66860217	66890564	+	3094	protein_coding	nuclear assembly factor 1 ribonucleoprotein [Source:MGI Symbol;Acc:MGI:2682306]	-	257	269	229	312	378	339	349	9.74995	8.62625	8.26062	9.66029	11.517	11.3305	10.967
ENSMUSG00000030279	1962.79	1913.29	1791.08	1838.14	2179.22	2674.88	2729.5	-0.414717	1.87705e-05	0.000335246	C2cd5	6	143010920	143100141	-	12621	protein_coding	C2 calcium-dependent domain containing 5 [Source:MGI Symbol;Acc:MGI:1921991]	-	1703	2073	1808	2049	2279	2550	2697	46.3293	47.6695	46.7679	45.4935	49.7926	61.1171	60.7739
ENSMUSG00000044375	6699.76	6454.23	6398.55	7159.68	8942.53	8707.53	9185.37	-0.413463	1.05346e-08	3.99672e-07	Pcare	17	71743555	71752894	-	5015	protein_coding	photoreceptor cilium actin regulator [Source:MGI Symbol;Acc:MGI:2385061]	-	5813	6993	6459	7981	9352	8301	9076	78.8019	80.131	83.2549	88.2998	101.817	99.1398	101.912
ENSMUSG00000099034	169.424	235.354	230.819	193.772	305.033	293.712	253.013	-0.412688	0.00484714	0.0324	2810039B14Rik	15	75642129	75653643	+	6418	transcribed_unitary_pseudogene	RIKEN cDNA 2810039B14 gene [Source:MGI Symbol;Acc:MGI:1919915]	-	147	255	233	216	319	280	250	6.70716	9.83472	10.1085	8.04342	11.6894	11.2554	9.44835
ENSMUSG00000020640	3069.23	2809.48	2648.97	2945.15	3386.92	4044.84	4134.23	-0.412184	1.45567e-05	0.000268502	Itsn2	12	4592638	4713962	+	13579	protein_coding	intersectin 2 [Source:MGI Symbol;Acc:MGI:1338049]	-	2663	3044	2674	3283	3542	3856	4085	64.5425	62.3619	61.6231	64.9399	68.9449	82.3366	82.009
ENSMUSG00000040554	9117.8	12291.9	10989.2	9942.45	15186.6	14627.9	12993.7	-0.412052	0.000115328	0.00158604	Aipl1	11	72027963	72037509	-	3157	protein_coding	aryl hydrocarbon receptor-interacting protein-like 1 [Source:MGI Symbol;Acc:MGI:2148800]	-	7911	13318	11093	11083	15882	13945	12839	228.278	324.842	304.361	261.009	368.058	354.513	306.873
ENSMUSG00000048988	1695.4	1806.22	1621.68	1773.55	2159.14	2285.71	2491.67	-0.411358	1.48434e-06	3.58569e-05	Elfn1	5	139907943	139974722	+	4172	protein_coding	leucine rich repeat and fibronectin type III, extracellular 1 [Source:MGI Symbol;Acc:MGI:2442479]	-	1471	1957	1637	1977	2258	2179	2462	47.1275	52.9973	49.8676	51.6934	58.0985	61.5036	65.3349
ENSMUSG00000024067	321.561	431.943	380.406	343.586	610.066	506.654	398.748	-0.411256	0.00567986	0.0366608	Dpy30	17	74299474	74323944	-	1146	protein_coding	dpy-30, histone methyltransferase complex regulatory subunit [Source:MGI Symbol;Acc:MGI:1913560]	-	279	468	384	383	638	483	394	30.8416	43.7299	40.3619	34.5539	56.6411	47.0393	36.0764
ENSMUSG00000107096	576.273	539.929	536.927	609.124	600.504	867.501	834.942	-0.411248	0.00150536	0.0131488	Gm43597	5	150599932	150607003	-	4620	lincRNA	predicted gene 43597 [Source:MGI Symbol;Acc:MGI:5663734]	-	500	585	542	679	628	827	825	15.6645	15.4919	16.1456	17.3614	15.8011	22.8262	21.409
ENSMUSG00000046994	542.85	541.775	618.16	638.728	768.798	794.073	800.532	-0.410859	4.71912e-05	0.000744035	Mars2	1	55237177	55248470	+	11294	protein_coding	methionine-tRNA synthetase 2 (mitochondrial) [Source:MGI Symbol;Acc:MGI:2444136]	-	471	587	624	712	804	757	791	2.83518	2.98675	3.57151	3.49789	3.88682	4.01455	3.94395
ENSMUSG00000025036	274.306	358.107	318.986	324.747	404.479	451.058	441.254	-0.410437	0.000723913	0.00735794	Sfxn2	19	46573365	46596898	+	3210	protein_coding	sideroflexin 2 [Source:MGI Symbol;Acc:MGI:2137678]	-	238	388	322	362	423	430	436	5.04057	6.946	6.48435	6.25716	7.19485	8.02328	7.64863
ENSMUSG00000045503	646.579	661.759	543.862	577.726	910.317	725.889	820.773	-0.410336	0.000330255	0.00384974	Sys1	2	164456964	164479638	+	4958	protein_coding	SYS1 Golgi-localized integral membrane protein homolog (S. cerevisiae) [Source:MGI Symbol;Acc:MGI:1913710]	-	561	717	549	644	952	692	811	24.4638	26.429	22.7636	22.9199	33.3409	26.5857	29.2939
ENSMUSG00000026260	1419.94	1692.7	1397.79	1465.85	2140.97	2019.27	1860.15	-0.410233	2.30737e-05	0.000404879	Ndufa10	1	92439010	92473860	-	3331	protein_coding	NADH:ubiquinone oxidoreductase subunit A10 [Source:MGI Symbol;Acc:MGI:1914523]	-	1232	1834	1411	1634	2239	1925	1838	95.3946	120.036	103.884	103.26	139.234	131.318	117.884
ENSMUSG00000000738	1861.36	1940.05	1655.36	1752.02	2579.87	2330.82	2333.79	-0.410152	3.06724e-06	6.86644e-05	Spg7	8	123062942	123097760	+	4518	protein_coding	SPG7, paraplegin matrix AAA peptidase subunit [Source:MGI Symbol;Acc:MGI:2385906]	-	1615	2102	1671	1953	2698	2222	2306	80.4944	88.5577	79.1913	79.444	107.998	97.5704	95.2023
ENSMUSG00000113831	671.935	534.391	495.321	615.404	761.148	737.428	847.086	-0.409667	0.000663888	0.00687187	AC163032.1	12	118231595	118234564	-	2970	lincRNA	novel transcript	-	583	579	500	686	796	703	837	13.345	11.2029	10.8825	12.8157	14.6333	14.1771	15.8698
ENSMUSG00000047446	549.765	578.693	548.815	510.444	768.798	744.771	688.194	-0.409287	2.9243e-05	0.000497628	Arl4a	12	40005447	40038025	-	7701	protein_coding	ADP-ribosylation factor-like 4A [Source:MGI Symbol;Acc:MGI:99437]	-	477	627	554	569	804	710	680	15.2246	16.9159	16.813	14.822	20.6093	19.9649	17.9776
ENSMUSG00000053716	1129.5	1079.86	942.1	1092.66	1449.62	1250.38	1578.8	-0.408869	0.000116918	0.00160471	Dusp7	9	106368632	106375724	+	3356	protein_coding	dual specificity phosphatase 7 [Source:MGI Symbol;Acc:MGI:2387100]	-	980	1170	951	1218	1516	1192	1560	51.6468	52.12	47.6547	52.3879	64.1647	55.3446	68.0985
ENSMUSG00000026803	471.392	475.322	501.264	455.722	586.16	703.861	629.495	-0.408632	9.99809e-05	0.00140543	Ttf1	2	29060262	29087656	+	6023	protein_coding	transcription termination factor, RNA polymerase I [Source:MGI Symbol;Acc:MGI:105044]	MYB	409	515	506	508	613	671	622	10.6087	11.2914	12.4795	10.754	12.7697	15.3336	13.3637
ENSMUSG00000038538	3238.66	2894.39	2956.07	3146.99	3324.76	4385.76	4645.31	-0.408505	0.000262186	0.00316256	Ubn2	6	38433950	38524825	+	21438	protein_coding	ubinuclein 2 [Source:MGI Symbol;Acc:MGI:2444236]	-	2810	3136	2984	3508	3477	4181	4590	46.7079	44.0616	47.1619	47.5893	46.416	61.2273	63.1963
ENSMUSG00000028689	403.391	488.243	460.648	322.055	639.708	624.139	452.387	-0.40827	0.00782157	0.0460757	Ccdc163	4	116708509	116751206	+	2519	protein_coding	coiled-coil domain containing 163 [Source:MGI Symbol;Acc:MGI:1915644]	-	350	529	465	359	669	595	447	27.7002	35.3892	34.9925	23.1886	42.5225	41.487	29.3033
ENSMUSG00000062198	230.509	304.575	253.604	270.024	344.238	416.442	319.808	-0.40816	0.00320436	0.0237124	2700097O09Rik	12	55045661	55080110	-	5021	protein_coding	RIKEN cDNA 2700097O09 gene [Source:MGI Symbol;Acc:MGI:1919908]	-	200	330	256	301	360	397	316	7.58328	10.5765	9.22943	9.3145	10.9625	13.2617	9.92451
ENSMUSG00000028461	718.037	999.561	939.128	699.731	1281.33	1139.18	996.87	-0.408016	0.0029666	0.0223033	Ccdc107	4	43492900	43495921	+	1547	protein_coding	coiled-coil domain containing 107 [Source:MGI Symbol;Acc:MGI:1913423]	-	623	1083	948	780	1340	1086	985	57.2353	84.1017	82.8117	58.4839	98.8688	87.8996	74.9561
ENSMUSG00000020770	692.681	749.44	741	653.082	1041.32	950.37	863.279	-0.407978	6.67932e-05	0.00099725	Unk	11	116030322	116061214	+	4438	protein_coding	unkempt family zinc finger [Source:MGI Symbol;Acc:MGI:2442456]	-	601	812	748	728	1089	906	853	20.8249	23.7829	24.6444	20.5876	30.3051	27.6578	24.4823
ENSMUSG00000016664	4542.19	4932.27	4004.17	4341.02	5677.05	6055.72	6148.21	-0.407783	3.44359e-06	7.67081e-05	Pacsin2	15	83375607	83464606	-	4908	protein_coding	protein kinase C and casein kinase substrate in neurons 2 [Source:MGI Symbol;Acc:MGI:1345153]	-	3941	5344	4042	4839	5937	5773	6075	145.77	167.082	142.156	146.078	176.363	188.124	186.124
ENSMUSG00000036181	1607.8	2329.54	1329.44	1488.27	2587.52	2309.84	2022.08	-0.407327	0.00776055	0.0458877	Hist1h1c	13	23738808	23740367	+	1560	protein_coding	histone cluster 1, H1c [Source:MGI Symbol;Acc:MGI:1931526]	-	1395	2524	1342	1659	2706	2202	1998	60.7935	92.9764	55.6088	59.0059	94.7086	84.5437	72.1229
ENSMUSG00000020021	502.51	446.71	468.573	460.207	558.43	658.755	674.026	-0.406644	0.000174698	0.00225195	Fgd6	10	94036001	94145339	+	8241	protein_coding	FYVE, RhoGEF and PH domain containing 6 [Source:MGI Symbol;Acc:MGI:1261419]	-	436	484	473	513	584	628	666	9.93667	9.32395	10.25	9.54196	10.6892	12.6094	12.5725
ENSMUSG00000029469	1041.9	1167.54	1079.8	1038.83	1335.83	1573.46	1436.1	-0.406463	1.2412e-05	0.00023324	Ift81	5	122550204	122614518	-	5840	protein_coding	intraflagellar transport 81 [Source:MGI Symbol;Acc:MGI:1098597]	-	904	1265	1090	1158	1397	1500	1419	51.9507	61.4488	59.5603	54.3122	64.476	75.9443	67.5461
ENSMUSG00000014748	1180.21	1330.9	1155.09	1242.47	1808.2	1637.45	1485.69	-0.406372	2.96244e-05	0.000503075	Tex261	6	83768885	83775813	-	4088	protein_coding	testis expressed gene 261 [Source:MGI Symbol;Acc:MGI:1096575]	-	1024	1442	1166	1385	1891	1561	1468	45.3227	53.9488	49.0707	50.0302	67.2182	60.8696	53.8192
ENSMUSG00000056851	6182.26	6125.66	5306.86	6130.72	7784.55	8462.07	7540.79	-0.406324	1.65316e-06	3.94069e-05	Pcbp2	15	102470539	102500061	+	5203	protein_coding	poly(rC) binding protein 2 [Source:MGI Symbol;Acc:MGI:108202]	-	5364	6637	5357	6834	8141	8067	7451	330.314	345.47	313.666	343.463	402.62	437.655	380.056
ENSMUSG00000069114	369.968	323.034	338.799	316.673	425.516	487.772	445.302	-0.406155	0.000354879	0.00408644	Zbtb10	3	9250602	9285333	+	7414	protein_coding	zinc finger and BTB domain containing 10 [Source:MGI Symbol;Acc:MGI:2139883]	-	321	350	342	353	445	465	440	2.94347	2.71283	2.98187	2.64177	3.27713	3.75655	3.34197
ENSMUSG00000020832	422.985	443.942	408.144	366.91	537.393	552.809	560.676	-0.405005	0.000153892	0.00203172	Eral1	11	78073376	78080383	-	2268	protein_coding	Era (G-protein)-like 1 (E. coli) [Source:MGI Symbol;Acc:MGI:1889295]	-	367	481	412	409	562	527	554	15.7912	17.4943	16.856	14.3628	19.4207	19.9775	19.7449
ENSMUSG00000059851	863.258	1038.32	982.716	881.84	1177.1	1400.38	1210.41	-0.404946	0.000107519	0.00149391	Kmt5c	7	4740115	4747514	+	4001	protein_coding	lysine methyltransferase 5C [Source:MGI Symbol;Acc:MGI:2385262]	-	749	1125	992	983	1231	1335	1196	44.7846	56.8591	56.3984	47.9696	59.1131	70.3249	59.2343
ENSMUSG00000024943	1200.95	1163.85	1136.27	1196.72	1350.18	1641.64	1725.55	-0.404888	5.076e-05	0.000791988	Smc5	19	23206451	23273897	-	6788	protein_coding	structural maintenance of chromosomes 5 [Source:MGI Symbol;Acc:MGI:2385088]	-	1042	1261	1147	1334	1412	1565	1705	30.6797	31.3833	32.1111	32.0557	33.3885	40.5956	41.5818
ENSMUSG00000014850	683.46	596.229	525.04	508.65	753.498	719.595	860.243	-0.404213	0.000977191	0.00934711	Msh3	13	92211872	92355003	-	11254	protein_coding	mutS homolog 3 [Source:MGI Symbol;Acc:MGI:109519]	-	593	646	530	567	788	686	850	19.6369	18.0822	16.6879	15.3238	20.9567	20.0135	23.3148
ENSMUSG00000041734	1451.06	1306.9	1244.25	1437.14	1725.97	1782.21	1939.09	-0.404178	1.01888e-05	0.000197646	Kirrel	3	87078593	87174747	-	7463	protein_coding	kirre like nephrin family adhesion molecule 1 [Source:MGI Symbol;Acc:MGI:1891396]	-	1259	1416	1256	1602	1805	1699	1916	15.3998	14.6404	14.6079	15.9925	17.7315	18.3089	19.4124
ENSMUSG00000012296	555.528	670.989	599.338	577.726	753.498	915.753	751.953	-0.403761	0.000330265	0.00384974	Tjap1	17	46257851	46283026	-	4701	protein_coding	tight junction associated protein 1 [Source:MGI Symbol;Acc:MGI:1921344]	-	482	727	605	644	788	873	743	30.7973	39.2646	36.7561	33.5829	40.4363	49.1429	39.3233
ENSMUSG00000026609	5502.26	4907.35	4292.45	5419.32	5700.96	6949.45	7613.66	-0.403583	0.000459491	0.00506451	Ush2a	1	188262023	188965041	+	17322	protein_coding	usherin [Source:MGI Symbol;Acc:MGI:1341292]	-	4774	5317	4333	6041	5962	6625	7523	64.6913	60.9018	55.829	66.8095	64.8835	79.0916	84.4402
ENSMUSG00000020069	1278.17	1975.12	1544.41	1415.61	2090.29	2189.21	2004.87	-0.403441	0.00160987	0.0138714	Hnrnph3	10	63014664	63024217	-	3151	protein_coding	heterogeneous nuclear ribonucleoprotein H3 [Source:MGI Symbol;Acc:MGI:1926462]	-	1109	2140	1559	1578	2186	2087	1981	55.5187	90.557	74.2099	64.4734	87.8894	92.0473	82.1461
ENSMUSG00000042210	992.343	1067.86	1060.98	851.339	1417.11	1390.94	1183.09	-0.402888	0.000227516	0.00281791	Abhd14a	9	106440051	106447678	-	2111	protein_coding	abhydrolase domain containing 14A [Source:MGI Symbol;Acc:MGI:1915894]	-	861	1157	1071	949	1482	1326	1169	59.9737	68.1226	70.9341	53.9498	82.9058	81.3734	67.4477
ENSMUSG00000041460	9144.31	8332.44	8220.34	8901.83	10507.9	11656.2	12399.6	-0.402838	1.36019e-06	3.34862e-05	Cacna2d4	6	119236526	119352407	+	9478	protein_coding	calcium channel, voltage-dependent, alpha 2/delta subunit 4 [Source:MGI Symbol;Acc:MGI:2442632]	-	7934	9028	8298	9923	10989	11112	12252	291.402	280.281	289.789	297.447	324.144	359.562	372.737
ENSMUSG00000063179	282.374	371.951	377.434	283.481	482.889	479.381	375.471	-0.402242	0.00542132	0.0352444	Pstk	7	131371141	131394482	+	7914	protein_coding	phosphoseryl-tRNA kinase [Source:MGI Symbol;Acc:MGI:2685945]	-	245	403	381	316	505	457	371	14.2604	19.8276	21.0862	15.0113	23.6067	23.4348	17.8868
ENSMUSG00000032590	934.716	1224.76	1079.8	949.122	1545.24	1523.11	1160.82	-0.401924	0.00150945	0.0131728	Apeh	9	108085413	108094606	-	5651	protein_coding	acylpeptide hydrolase [Source:MGI Symbol;Acc:MGI:88041]	-	811	1327	1090	1058	1616	1452	1147	33.7012	46.6118	43.0684	35.8819	53.9317	53.1584	39.4805
ENSMUSG00000031523	1469.5	1086.32	1094.66	1246.06	1578.71	1535.7	1809.55	-0.401321	0.000660783	0.00684408	Dlc1	8	36567751	36953143	-	14694	protein_coding	deleted in liver cancer 1 [Source:MGI Symbol;Acc:MGI:1354949]	-	1275	1177	1105	1389	1651	1464	1788	25.952	20.2506	21.3861	23.0743	26.989	26.2533	30.1456
ENSMUSG00000074890	349.222	393.179	369.509	309.496	494.364	433.226	502.989	-0.401118	0.00087062	0.00849916	Lcmt2	2	121128307	121140653	-	3350	protein_coding	leucine carboxyl methyltransferase 2 [Source:MGI Symbol;Acc:MGI:1353659]	-	303	426	373	345	517	413	497	8.07495	9.59637	9.45178	7.50381	11.0654	9.69679	10.9711
ENSMUSG00000035620	2600.15	2511.36	2189.32	2516.34	3062.76	3403.92	3329.65	-0.400132	4.90348e-06	0.000104328	Ric8b	10	84917616	85018337	+	5272	protein_coding	RIC8 guanine nucleotide exchange factor B [Source:MGI Symbol;Acc:MGI:2682307]	-	2256	2721	2210	2805	3203	3245	3290	59.7244	60.8894	55.6305	60.6054	68.1002	75.6847	72.1445
ENSMUSG00000073434	607.392	611.919	690.477	669.23	816.608	905.264	857.207	-0.399562	3.49482e-05	0.00057727	Wdr90	17	25844771	25861501	-	8466	protein_coding	WD repeat domain 90 [Source:MGI Symbol;Acc:MGI:1921267]	-	527	663	697	746	854	863	847	11.9465	12.7041	15.0235	13.8018	15.5478	17.2355	15.9041
ENSMUSG00000020739	693.833	737.441	728.121	685.377	995.421	954.565	888.58	-0.399175	1.05015e-05	0.000202518	Nup85	11	115564434	115583985	+	3385	protein_coding	nucleoporin 85 [Source:MGI Symbol;Acc:MGI:3046173]	-	602	799	735	764	1041	910	878	50.7143	56.8959	58.8748	52.5283	70.4309	67.5393	61.2665
ENSMUSG00000038895	240.882	332.264	286.295	315.776	432.21	412.246	346.121	-0.399139	0.00366431	0.0261213	Zfp653	9	22055411	22071376	-	4938	protein_coding	zinc finger protein 653 [Source:MGI Symbol;Acc:MGI:2442362]	zf-C2H2	209	360	289	352	452	393	342	6.03341	8.78455	7.93272	8.29326	10.4793	9.99517	8.17782
ENSMUSG00000037805	2559.81	3151.89	2923.38	2730.74	4054.36	3838.19	3462.22	-0.399076	3.09786e-05	0.00052272	Rpl10a	17	28328471	28331033	+	2431	protein_coding	ribosomal protein L10A [Source:MGI Symbol;Acc:MGI:1343877]	-	2221	3415	2951	3044	4240	3659	3421	188.741	245.306	238.448	211.119	289.376	273.943	240.805
ENSMUSG00000072640	1363.46	1198	1134.28	1264	1547.16	1678.36	1722.51	-0.398743	1.70889e-05	0.000309507	Lyrm9	11	78826584	78846870	+	8146	protein_coding	LYR motif containing 9 [Source:MGI Symbol;Acc:MGI:1913524]	-	1183	1298	1145	1409	1618	1600	1702	27.6091	25.606	25.4086	26.8376	30.3266	32.8979	32.9019
ENSMUSG00000021730	7413.18	5465.74	4862.07	5999.74	7141.98	8011.01	8754.24	-0.398611	0.00170601	0.0144578	Hcn1	13	117602320	117987418	+	18120	protein_coding	hyperpolarization-activated, cyclic nucleotide-gated K+ 1 [Source:MGI Symbol;Acc:MGI:1096392]	-	6432	5922	4908	6688	7469	7637	8650	45.6444	35.5231	33.1173	38.7351	42.568	47.747	50.8456
ENSMUSG00000041958	1060.34	1103.85	1064.94	1034.35	1387.47	1464.37	1390.56	-0.398186	4.83901e-07	1.29768e-05	Pigs	11	78328415	78342782	+	2501	protein_coding	phosphatidylinositol glycan anchor biosynthesis, class S [Source:MGI Symbol;Acc:MGI:2687325]	-	920	1196	1075	1153	1451	1396	1374	25.0082	27.4805	27.785	25.5793	31.6767	33.4318	30.9368
ENSMUSG00000005682	1520.21	1736.08	1847.55	1518.77	1997.53	2414.74	2212.34	-0.398175	0.00012098	0.00165041	Pan2	10	128303335	128321358	+	8472	protein_coding	PAN2 poly(A) specific ribonuclease subunit [Source:MGI Symbol;Acc:MGI:1918984]	-	1319	1881	1865	1693	2089	2302	2186	22.4514	27.0638	30.1846	23.5192	28.5573	34.5212	30.8208
ENSMUSG00000033949	439.12	415.33	316.015	418.044	472.371	537.074	592.05	-0.397266	0.0028496	0.0216861	Trim36	18	46165302	46212607	-	4849	protein_coding	tripartite motif-containing 36 [Source:MGI Symbol;Acc:MGI:106264]	-	381	450	319	466	494	512	585	5.70151	5.69217	4.53903	5.69137	5.93705	6.75019	7.25129
ENSMUSG00000018428	1332.34	1269.99	1174.9	1405.74	1683.9	1784.3	1695.18	-0.397261	7.73519e-06	0.000154712	Akap1	11	88830792	88864586	-	4390	protein_coding	A kinase (PRKA) anchor protein 1 [Source:MGI Symbol;Acc:MGI:104729]	-	1156	1376	1186	1567	1761	1701	1675	30.3435	30.53	29.6006	33.5693	37.1232	39.3363	36.4181
ENSMUSG00000029283	425.29	444.865	449.751	366.91	529.744	674.49	494.893	-0.397207	0.0023394	0.01845	Cdc7	5	106964322	106984432	+	4183	protein_coding	cell division cycle 7 (S. cerevisiae) [Source:MGI Symbol;Acc:MGI:1309511]	-	369	482	454	409	554	643	489	10.813	11.939	12.6498	9.78158	13.0379	16.6001	11.8692
ENSMUSG00000020520	1758.79	1832.07	1412.65	1830.96	2173.48	2261.59	2396.54	-0.397076	0.000143188	0.00190717	Galnt10	11	57645442	57787514	+	5965	protein_coding	polypeptide N-acetylgalactosaminyltransferase 10 [Source:MGI Symbol;Acc:MGI:1890480]	-	1526	1985	1426	2041	2273	2156	2368	32.1188	35.3155	28.5386	35.0602	38.4223	39.9793	41.284
ENSMUSG00000036598	199.391	190.129	167.418	165.962	262.959	261.194	206.458	-0.396329	0.00625638	0.0393129	Ccdc113	8	95534085	95558890	+	1288	protein_coding	coiled-coil domain containing 113 [Source:MGI Symbol;Acc:MGI:3606076]	-	173	206	169	185	275	249	204	9.13141	9.19093	8.48176	7.96947	11.6574	11.579	8.91901
ENSMUSG00000090626	275.459	243.66	253.604	248.494	273.478	388.12	369.398	-0.395629	0.00474952	0.0319407	Tex9	9	72450394	72492212	-	8798	protein_coding	testis expressed gene 9 [Source:MGI Symbol;Acc:MGI:1201610]	-	239	264	256	277	286	370	365	10.503	9.80667	10.6971	9.93489	10.094	14.3252	13.2863
ENSMUSG00000038828	1259.73	1180.46	1143.2	1166.22	1346.35	1712.97	1680	-0.395477	0.000115382	0.00158604	Tmem214	5	30868012	30879180	+	7580	protein_coding	transmembrane protein 214 [Source:MGI Symbol;Acc:MGI:1916046]	-	1093	1279	1154	1300	1408	1633	1660	26.8352	26.5433	26.94	26.0492	27.763	35.3225	33.7588
ENSMUSG00000067995	454.103	529.776	449.751	462.002	675.088	617.845	601.158	-0.395447	0.000208913	0.0026254	Gtf2f2	14	75896937	76010865	-	1467	protein_coding	general transcription factor IIF, polypeptide 2 [Source:MGI Symbol;Acc:MGI:1915955]	-	394	574	454	515	706	589	594	18.2589	22.4848	20.0051	19.4783	26.2761	24.0477	22.8013
ENSMUSG00000024519	6561.45	7896.81	6954.3	6762.27	10054.6	9320.13	8662.14	-0.395315	1.26407e-05	0.000236795	Cplx4	18	65955727	65970178	-	1751	protein_coding	complexin 4 [Source:MGI Symbol;Acc:MGI:2685803]	-	5693	8556	7020	7538	10515	8885	8559	221.036	280.797	259.159	238.86	327.876	303.92	275.258
ENSMUSG00000028412	1771.46	1661.32	1382.94	1498.14	2096.03	2065.43	2127.33	-0.395054	5.35474e-05	0.000824768	Slc44a1	4	53440413	53622478	+	6945	protein_coding	solute carrier family 44, member 1 [Source:MGI Symbol;Acc:MGI:2140592]	-	1537	1800	1396	1670	2192	1969	2102	48.805	48.313	42.1487	43.2786	55.8998	55.083	55.2864
ENSMUSG00000017837	360.747	517.778	394.275	355.248	564.167	515.046	562.7	-0.395011	0.00384999	0.0270701	Nkiras2	11	100619244	100627607	+	3578	protein_coding	NFKB inhibitor interacting Ras-like protein 2 [Source:MGI Symbol;Acc:MGI:1919216]	-	313	561	398	396	590	491	556	18.0178	27.2974	21.7845	18.6045	27.2765	24.9012	26.5111
ENSMUSG00000032839	2363.87	2296.31	1688.05	2222.99	2996.78	2897.26	2680.92	-0.394889	0.000567273	0.00603117	Trpc1	9	95705082	95750375	-	8030	protein_coding	transient receptor potential cation channel, subfamily C, member 1 [Source:MGI Symbol;Acc:MGI:109528]	-	2051	2488	1704	2478	3134	2762	2649	53.3418	54.6956	42.1385	52.598	65.4606	63.2859	57.0662
ENSMUSG00000052794	208.611	203.05	246.67	207.228	255.31	296.859	319.808	-0.394171	0.00383626	0.0270052	1700030K09Rik	8	72443880	72461001	+	2970	protein_coding	RIKEN cDNA 1700030K09 gene [Source:MGI Symbol;Acc:MGI:1919504]	-	181	220	249	231	267	283	316	6.72779	6.91221	8.80037	7.00764	7.97047	9.26747	9.72917
ENSMUSG00000020089	1437.23	1681.62	1400.77	1385.11	2192.6	1861.93	1832.82	-0.394094	0.000140929	0.00188125	Ppa1	10	61648552	61674168	+	2902	protein_coding	pyrophosphatase (inorganic) 1 [Source:MGI Symbol;Acc:MGI:97831]	-	1247	1822	1414	1544	2293	1775	1811	96.4462	119.115	103.986	97.4612	142.43	120.948	116.02
ENSMUSG00000035151	1642.38	1495.19	1526.58	1552.86	1841.67	2049.69	2290.27	-0.393405	2.89411e-05	0.000493422	Elmod2	8	83312632	83332486	-	11138	protein_coding	ELMO/CED-12 domain containing 2 [Source:MGI Symbol;Acc:MGI:2445165]	-	1425	1620	1541	1731	1926	1954	2263	31.2105	29.9917	32.092	30.942	33.8782	37.7043	41.0549
ENSMUSG00000089862	198.238	233.508	223.885	244.009	356.669	292.663	259.085	-0.393319	0.00578348	0.0371963	Umad1	6	8259288	8459470	+	5018	protein_coding	UMAP1-MVP12 associated (UMA) domain containing 1 [Source:MGI Symbol;Acc:MGI:3840148]	-	172	253	226	272	373	279	256	7.90086	9.82351	9.87102	10.1972	13.7605	11.291	9.74049
ENSMUSG00000026721	1287.39	1088.16	1060.98	1278.35	1556.72	1470.66	1666.85	-0.393105	0.000111575	0.00154312	Rabgap1l	1	160219174	160793211	-	23232	protein_coding	RAB GTPase activating protein 1-like [Source:MGI Symbol;Acc:MGI:1352507]	-	1117	1179	1071	1425	1628	1402	1647	40.849	36.4454	37.2413	42.5313	47.8147	45.1707	49.8904
ENSMUSG00000028101	1241.29	1578.25	1418.6	1382.42	2053.95	1930.11	1625.35	-0.392803	0.000339581	0.0039329	Pias3	3	96696384	96706070	+	3918	protein_coding	protein inhibitor of activated STAT 3 [Source:MGI Symbol;Acc:MGI:1913126]	zf-MIZ	1077	1710	1432	1541	2148	1840	1606	48.9758	65.7299	61.918	57.192	78.4476	73.7166	60.4932
ENSMUSG00000040771	396.476	664.528	600.329	522.107	812.783	720.644	675.038	-0.392682	0.00783344	0.0460996	Oard1	17	48410014	48417266	+	1558	protein_coding	O-acyl-ADP-ribose deacylase 1 [Source:MGI Symbol;Acc:MGI:2146818]	-	344	720	606	582	850	687	667	23.0182	40.7236	38.5562	31.7836	45.6785	40.4997	36.9687
ENSMUSG00000029640	2958.59	2766.1	2598.45	2948.74	3600.15	3649.38	3918.66	-0.391972	1.26436e-06	3.1471e-05	Usp12	5	146734809	146795006	-	4639	protein_coding	ubiquitin specific peptidase 12 [Source:MGI Symbol;Acc:MGI:1270128]	-	2567	2997	2623	3287	3765	3479	3872	59.6022	58.8198	57.9085	62.2877	70.207	71.1659	74.4675
ENSMUSG00000026014	691.528	755.901	651.842	688.965	878.762	874.844	1021.16	-0.391876	0.000106849	0.00148804	Raph1	1	60482292	60567104	-	20498	protein_coding	Ras association (RalGDS/AF-6) and pleckstrin homology domains 1 [Source:MGI Symbol;Acc:MGI:1924550]	-	600	819	658	768	919	834	1009	12.2018	14.0785	12.7234	12.7467	15.0095	14.9423	16.9964
ENSMUSG00000041794	1303.53	1403.82	1170.94	1410.23	1579.67	1885	1798.41	-0.391784	0.000101065	0.00141818	Myrip	9	120301513	120474841	+	5537	protein_coding	myosin VIIA and Rab interacting protein [Source:MGI Symbol;Acc:MGI:2384407]	-	1131	1521	1182	1572	1652	1797	1777	47.6394	54.1544	47.3401	54.0409	55.8847	66.6858	61.9992
ENSMUSG00000042042	766.444	684.833	679.58	683.583	974.384	964.006	856.195	-0.391654	5.23919e-05	0.000810433	Csgalnact2	6	118107452	118139140	-	5438	protein_coding	chondroitin sulfate N-acetylgalactosaminyltransferase 2 [Source:MGI Symbol;Acc:MGI:1926002]	-	665	742	686	762	1019	919	846	13.9621	13.1685	13.695	13.0572	17.1824	16.9992	14.7128
ENSMUSG00000002771	265.086	238.123	203.081	252.98	331.807	338.818	291.471	-0.391317	0.00320252	0.023711	Grin2d	7	45831883	45878378	-	6658	protein_coding	glutamate receptor, ionotropic, NMDA2D (epsilon 4) [Source:MGI Symbol;Acc:MGI:95823]	-	230	258	205	282	347	323	288	4.0155	3.80743	3.40309	4.01815	4.86541	4.96815	4.16485
ENSMUSG00000034518	487.527	514.086	461.639	490.708	686.563	625.188	629.495	-0.390723	7.56745e-05	0.00110963	Hmgxb4	8	74993356	75031978	+	5227	protein_coding	HMG box domain containing 4 [Source:MGI Symbol;Acc:MGI:1918073]	HMG	423	557	466	547	718	596	622	18.5891	20.6906	19.472	19.6187	25.3408	23.0751	22.6414
ENSMUSG00000048921	126.78	155.057	139.68	153.402	191.243	187.766	201.398	-0.3901	0.00691412	0.0422944	Zfp689	7	127442136	127449158	-	3621	protein_coding	zinc finger protein 689 [Source:MGI Symbol;Acc:MGI:1918381]	zf-C2H2	110	168	141	171	200	179	199	2.96874	3.83256	3.61831	3.76653	4.33499	4.25612	4.44864
ENSMUSG00000047921	1947.8	2192.94	1942.65	2150.33	2948.97	2798.66	2422.85	-0.389936	3.92497e-05	0.000636078	Trappc9	15	72589620	73061204	-	7937	protein_coding	trafficking protein particle complex 9 [Source:MGI Symbol;Acc:MGI:1923760]	-	1690	2376	1961	2397	3084	2668	2394	34.5232	41.0271	38.0899	39.963	50.5961	48.0166	40.5082
ENSMUSG00000018377	3297.44	2966.38	2723.27	3249.26	3711.07	4158.13	4261.74	-0.389195	3.47822e-05	0.000575055	Vezf1	11	88068279	88084729	+	4601	protein_coding	vascular endothelial zinc finger 1 [Source:MGI Symbol;Acc:MGI:1313291]	zf-C2H2	2861	3214	2749	3622	3881	3964	4211	45.7761	43.4677	41.8219	47.2972	49.8704	55.8773	55.8086
ENSMUSG00000030545	413.764	493.781	460.648	448.545	621.54	610.502	574.845	-0.389142	0.000183685	0.00235601	Pex11a	7	79735957	79743131	-	3182	protein_coding	peroxisomal biogenesis factor 11 alpha [Source:MGI Symbol;Acc:MGI:1338788]	-	359	535	465	500	650	582	568	19.1873	24.1699	23.6309	21.81	27.9005	27.4047	25.1457
ENSMUSG00000049488	306.577	312.882	269.454	274.51	416.91	390.218	353.206	-0.389106	0.00128416	0.0116408	Tmem67	4	12039355	12090020	-	7744	protein_coding	transmembrane protein 67 [Source:MGI Symbol;Acc:MGI:1923928]	-	266	339	272	306	436	372	349	6.23149	6.7129	6.0588	5.85056	8.20305	7.67775	6.77221
ENSMUSG00000064302	3825.3	2986.68	2766.86	3321.93	3833.47	4122.46	4915.53	-0.389079	0.00119688	0.0110327	Clasp1	1	118389058	118612678	+	21844	protein_coding	CLIP associating protein 1 [Source:MGI Symbol;Acc:MGI:1923957]	-	3319	3236	2793	3703	4009	3930	4857	53.6215	44.1917	42.9053	48.826	52.0172	55.9378	64.9972
ENSMUSG00000033669	172.882	184.591	176.334	160.579	239.054	223.431	232.772	-0.388755	0.00339741	0.0246429	Zfp7	15	76879259	76892395	+	5816	protein_coding	zinc finger protein 7 [Source:MGI Symbol;Acc:MGI:99208]	zf-C2H2	150	200	178	179	250	213	230	4.54439	5.12171	5.12758	4.42592	6.0828	5.68519	5.77175
ENSMUSG00000021115	452.951	413.484	417.06	420.735	578.511	566.445	544.483	-0.388644	9.52903e-05	0.00134579	Vrk1	12	106010228	106077426	+	5122	protein_coding	vaccinia related kinase 1 [Source:MGI Symbol;Acc:MGI:1261847]	-	393	448	421	469	605	540	538	13.7084	13.2091	13.9632	13.3516	16.9484	16.5947	15.5444
ENSMUSG00000078919	232.814	231.662	230.819	247.597	303.12	286.37	353.206	-0.388636	0.00210542	0.0170601	Dpm1	2	168209048	168230591	-	7489	protein_coding	dolichol-phosphate (beta-D) mannosyltransferase 1 [Source:MGI Symbol;Acc:MGI:1330239]	-	202	251	233	276	317	273	349	11.0927	11.6509	12.1661	12.3698	13.9806	13.2078	15.8748
ENSMUSG00000040865	1759.94	1323.52	1374.02	1530.44	1691.55	2059.13	2222.46	-0.388541	0.00134815	0.012075	Ino80d	1	62958418	63114667	-	17713	protein_coding	INO80 complex subunit D [Source:MGI Symbol;Acc:MGI:3027003]	-	1527	1434	1387	1706	1769	1963	2196	14.1202	11.2086	12.1951	12.875	13.1374	15.992	16.8201
ENSMUSG00000045576	518.646	630.379	537.918	605.536	753.498	768.897	756.002	-0.388092	0.000162167	0.00212076	St7l	3	104864005	104930064	+	11136	protein_coding	suppression of tumorigenicity 7-like [Source:MGI Symbol;Acc:MGI:2386964]	-	450	683	543	675	788	733	747	14.1306	18.1289	16.2128	17.2989	19.8726	20.2784	19.4297
ENSMUSG00000028911	814.851	819.584	789.541	845.956	1029.84	1088.83	1115.28	-0.387861	4.80974e-06	0.000102697	Srsf4	4	131873617	131901706	+	3561	protein_coding	serine/arginine-rich splicing factor 4 [Source:MGI Symbol;Acc:MGI:1890577]	-	707	888	797	943	1077	1038	1102	26.7472	28.397	28.6699	29.1164	32.7231	34.597	34.5331
ENSMUSG00000022802	779.122	781.743	644.907	812.764	929.442	993.377	1076.82	-0.387801	0.000302644	0.00357497	Lmln	16	33062521	33127695	+	6511	protein_coding	leishmanolysin-like (metallopeptidase M8 family) [Source:MGI Symbol;Acc:MGI:2444736]	-	676	847	651	906	972	947	1064	22.8189	24.1675	20.8947	24.9599	26.3508	28.163	29.7498
ENSMUSG00000060733	3522.18	3285.72	2595.48	3556.96	4080.17	4312.33	4491.48	-0.38774	0.00042428	0.00473983	Ipmk	10	71347763	71433327	+	7093	protein_coding	inositol polyphosphate multikinase [Source:MGI Symbol;Acc:MGI:1916968]	-	3056	3560	2620	3965	4267	4111	4438	121.996	120.128	99.4494	129.182	136.803	144.584	146.749
ENSMUSG00000031949	153.289	159.671	136.708	157.888	189.331	207.697	213.543	-0.387727	0.00603436	0.0383311	Adat1	8	111966908	111992302	-	4399	protein_coding	adenosine deaminase, tRNA-specific 1 [Source:MGI Symbol;Acc:MGI:1353631]	-	133	173	138	176	198	198	211	3.57105	3.92636	3.52315	3.85676	4.26961	4.68371	4.69268
ENSMUSG00000043415	265.086	228.893	222.894	278.995	371.968	296.859	327.904	-0.387486	0.00422124	0.0289956	Otud1	2	19657752	19660583	+	2832	protein_coding	OTU domain containing 1 [Source:MGI Symbol;Acc:MGI:1918448]	-	230	248	225	311	389	283	324	5.52131	5.0323	5.13576	6.09313	7.49968	5.98524	6.4425
ENSMUSG00000032579	520.951	597.152	578.534	651.288	779.316	776.24	776.243	-0.38734	0.000144749	0.00192511	Hemk1	9	107327084	107338350	-	3646	protein_coding	HemK methyltransferase family member 1 [Source:MGI Symbol;Acc:MGI:1916786]	-	452	647	584	726	815	740	767	29.3494	35.5112	36.0563	38.4737	42.5008	42.3325	41.2526
ENSMUSG00000026273	180.95	212.28	262.52	245.803	309.814	287.419	309.687	-0.387333	0.00651471	0.040573	Mterf4	1	93299211	93305915	-	5271	protein_coding	mitochondrial transcription termination factor 4 [Source:MGI Symbol;Acc:MGI:1918355]	-	157	230	265	274	324	274	306	6.56831	8.13359	10.5416	9.35558	10.8862	10.0992	10.604
ENSMUSG00000030602	409.154	389.487	376.444	377.675	505.838	506.654	526.266	-0.387306	0.000132076	0.00178288	Pak4	7	28558819	28598185	-	3535	protein_coding	p21 (RAC1) activated kinase 4 [Source:MGI Symbol;Acc:MGI:1917834]	-	355	422	380	421	529	483	520	14.8064	14.8776	15.0699	14.3307	17.7196	17.7479	17.9646
ENSMUSG00000024063	3743.47	3735.2	2975.89	3333.59	4608	4564.08	4474.28	-0.386814	4.24378e-05	0.000679194	Lbh	17	72918305	72941947	+	3212	protein_coding	limb-bud and heart [Source:MGI Symbol;Acc:MGI:1925139]	-	3248	4047	3004	3716	4819	4351	4421	129.737	136.641	114.092	121.141	154.591	153.115	146.273
ENSMUSG00000021271	353.832	333.187	314.033	327.438	437.947	433.226	446.314	-0.386606	0.000301094	0.00356505	Zfp839	12	110850253	110869996	+	3749	protein_coding	zinc finger protein 839 [Source:MGI Symbol;Acc:MGI:1920055]	-	307	361	317	365	458	413	441	9.47395	9.41674	9.30165	9.19289	11.3511	11.2286	11.2727
ENSMUSG00000087141	2844.49	2754.1	2361.69	2751.38	3424.21	3474.2	3685.89	-0.386503	9.52305e-06	0.000186538	Plcxd2	16	45959263	46010218	-	7140	protein_coding	phosphatidylinositol-specific phospholipase C, X domain containing 2 [Source:MGI Symbol;Acc:MGI:3647874]	-	2468	2984	2384	3067	3581	3312	3642	23.4993	24.0164	21.5836	23.8336	27.3837	27.7831	28.7239
ENSMUSG00000024835	1318.51	1633.63	1558.28	1434.45	2075.94	1992	1820.68	-0.38629	7.91357e-05	0.00114916	Coro1b	19	4148619	4154035	+	2372	protein_coding	coronin, actin binding protein 1B [Source:MGI Symbol;Acc:MGI:1345963]	-	1144	1770	1573	1599	2171	1899	1799	108.623	142.059	142.014	123.911	165.552	158.855	141.488
ENSMUSG00000087370	2316.62	1572.72	1532.52	1922.46	2096.03	2373.83	2896.49	-0.386029	0.0067459	0.0415585	Tmem170b	13	41605907	41641355	+	7477	protein_coding	transmembrane protein 170B [Source:MGI Symbol;Acc:MGI:3647046]	-	2010	1704	1547	2143	2192	2263	2862	35.1732	25.205	25.7404	30.6059	30.806	34.8885	41.484
ENSMUSG00000106951	492.138	431.943	404.182	482.635	559.386	543.368	701.351	-0.385563	0.00194807	0.0160231	5930430L01Rik	5	148990056	148995223	-	3994	lincRNA	RIKEN cDNA 5930430L01 gene [Source:MGI Symbol;Acc:MGI:2443110]	-	427	468	408	538	585	518	693	8.88559	8.23199	8.07284	9.13706	9.77672	9.49662	11.945
ENSMUSG00000023909	1626.24	1468.42	1478.04	1658.72	1930.6	2005.64	2216.39	-0.384756	1.80063e-05	0.000324168	Paqr4	17	23736186	23740867	-	2644	protein_coding	progestin and adipoQ receptor family member IV [Source:MGI Symbol;Acc:MGI:1923748]	-	1411	1591	1492	1849	2019	1912	2190	64.0358	61.0332	64.3832	68.4855	73.5887	76.4477	82.3256
ENSMUSG00000041560	3137.23	2994.99	2604.4	2995.39	3933.87	3652.52	3989.5	-0.384673	9.86533e-06	0.000192614	Nop53	7	15936183	15946074	-	3847	protein_coding	NOP53 ribosome biogenesis factor [Source:MGI Symbol;Acc:MGI:2154441]	-	2722	3245	2629	3339	4114	3482	3942	107.777	108.606	98.9773	107.9	130.822	121.464	129.285
ENSMUSG00000002797	155.594	139.366	169.4	153.402	208.455	223.431	187.229	-0.3845	0.00749619	0.0447018	Ggct	6	54982580	54992950	-	7745	protein_coding	gamma-glutamyl cyclotransferase [Source:MGI Symbol;Acc:MGI:95700]	-	135	151	171	171	218	213	185	5.71117	5.39969	6.87853	5.9041	7.40674	7.93875	6.48273
ENSMUSG00000055923	390.713	348.877	362.575	331.923	382.486	532.878	516.146	-0.384252	0.00387664	0.0272256	Aasdh	5	76873659	76905514	-	8639	protein_coding	aminoadipate-semialdehyde dehydrogenase [Source:MGI Symbol;Acc:MGI:2442517]	-	339	378	366	370	400	508	510	12.4308	11.7163	12.7611	11.073	11.7798	16.4113	15.4904
ENSMUSG00000057440	399.934	474.399	463.62	394.72	629.19	616.796	479.712	-0.383077	0.00262219	0.0202375	Mpp7	18	7347962	7626863	-	4975	protein_coding	membrane protein, palmitoylated 7 (MAGUK p55 subfamily member 7) [Source:MGI Symbol;Acc:MGI:1922989]	-	347	514	468	440	658	588	474	4.74181	5.93715	6.0809	4.90719	7.22136	7.07901	5.36522
ENSMUSG00000092417	209.764	226.124	209.025	210.816	308.858	251.754	291.471	-0.382686	0.00307244	0.0229554	Gpank1	17	35121455	35124814	+	1879	protein_coding	G patch domain and ankyrin repeats 1 [Source:MGI Symbol;Acc:MGI:2148975]	-	182	245	211	235	323	240	288	14.3373	16.3141	15.8047	15.1088	20.4352	16.6567	18.7925
ENSMUSG00000058586	149.831	202.127	170.39	183.006	246.704	239.166	221.639	-0.382598	0.00723901	0.0437766	Serhl	15	83089506	83116674	+	7393	protein_coding	serine hydrolase-like [Source:MGI Symbol;Acc:MGI:1890404]	-	130	219	172	204	258	228	219	9.46246	13.4743	11.9041	12.1187	15.082	14.621	13.2038
ENSMUSG00000039671	3532.56	3224.81	2964.99	3354.22	4031.41	4285.05	4565.36	-0.382346	1.11923e-05	0.000213435	Zmynd8	2	165784152	165899016	-	11031	protein_coding	zinc finger, MYND-type containing 8 [Source:MGI Symbol;Acc:MGI:1918025]	-	3065	3494	2993	3739	4216	4085	4511	87.5142	84.3279	81.2573	87.1304	96.678	102.759	106.688
ENSMUSG00000025916	208.611	260.273	237.754	224.273	303.12	333.573	291.471	-0.382006	0.00302847	0.0227211	Ppp1r42	1	9968624	10009136	-	1523	protein_coding	protein phosphatase 1, regulatory subunit 42 [Source:MGI Symbol;Acc:MGI:1921138]	-	181	282	240	250	317	318	288	12.8715	16.9511	16.2281	14.5096	18.1045	19.9231	16.9643
ENSMUSG00000022498	772.206	682.987	701.374	704.216	895.018	957.712	965.496	-0.381944	2.90543e-05	0.000494885	Txndc11	16	11074911	11134650	-	8835	protein_coding	thioredoxin domain containing 11 [Source:MGI Symbol;Acc:MGI:1923620]	-	670	740	708	785	936	913	954	23.9607	22.3696	24.075	22.9119	26.8831	28.7659	28.2598
ENSMUSG00000052698	5271.75	3949.33	3352.33	4623.6	5030.65	5608.86	6514.57	-0.381843	0.00489068	0.0326426	Tln2	9	67217087	67559703	-	18357	protein_coding	talin 2 [Source:MGI Symbol;Acc:MGI:1917799]	-	4574	4279	3384	5154	5261	5347	6437	57.0882	45.1432	40.1595	52.5001	52.7348	58.7951	66.547
ENSMUSG00000051890	325.018	441.173	317.005	387.543	512.532	495.115	459.471	-0.381706	0.00377365	0.026722	Klhdc1	12	69241176	69284632	+	3137	protein_coding	kelch domain containing 1 [Source:MGI Symbol;Acc:MGI:2672853]	-	282	478	320	432	536	472	454	16.7291	23.9691	18.0501	20.9157	25.5368	24.6687	22.3087
ENSMUSG00000043065	336.544	431.943	385.359	344.483	470.458	545.466	473.64	-0.381105	0.00197612	0.0161945	Spice1	16	44347121	44388497	+	5416	protein_coding	spindle and centriole associated protein 1 [Source:MGI Symbol;Acc:MGI:1196252]	-	292	468	389	384	492	520	468	14.7156	19.9362	18.6403	15.794	19.9131	23.0877	19.536
ENSMUSG00000083844	265.086	353.492	306.108	283.481	464.721	380.777	360.29	-0.380847	0.00553498	0.0358798	Ube2d-ps	11	5762129	5784710	+	3102	transcribed_unprocessed_pseudogene	ubiquitin-conjugating enzyme E2D, pseudogene [Source:MGI Symbol;Acc:MGI:1913774]	-	230	383	309	316	486	363	356	13.9735	19.6687	17.8502	15.6686	23.7133	19.4297	17.9152
ENSMUSG00000015653	1577.84	1389.05	1395.81	1589.64	1755.61	1911.23	2210.32	-0.380833	0.000214241	0.00268114	Steap2	5	5664829	5694578	-	12144	protein_coding	six transmembrane epithelial antigen of prostate 2 [Source:MGI Symbol;Acc:MGI:1921301]	-	1369	1505	1409	1772	1836	1822	2184	19.9209	18.5115	19.495	21.0443	21.4564	23.3579	26.324
ENSMUSG00000022160	489.832	629.456	525.04	535.563	760.192	774.142	628.483	-0.380356	0.00145347	0.0127833	Mettl3	14	52294841	52305128	-	5076	protein_coding	methyltransferase like 3 [Source:MGI Symbol;Acc:MGI:1927165]	-	425	682	530	597	795	738	621	27.5174	37.3253	32.6289	31.547	41.3394	42.0974	33.3046
ENSMUSG00000024276	1551.33	1386.28	1265.05	1519.67	1727.88	1981.51	1933.02	-0.38026	0.000118535	0.00162443	Zfp397	18	23954692	23964673	+	8262	protein_coding	zinc finger protein 397 [Source:MGI Symbol;Acc:MGI:1916506]	zf-C2H2	1346	1502	1277	1694	1807	1889	1910	36.4859	34.4152	32.9139	37.4765	39.3384	45.1121	42.8853
ENSMUSG00000028246	1228.62	886.037	930.212	1012.82	1223	1366.81	1428	-0.379943	0.0013858	0.0123448	Faxc	4	21931329	21996839	+	8362	protein_coding	failed axon connections homolog [Source:MGI Symbol;Acc:MGI:1923382]	-	1066	960	939	1129	1279	1303	1411	27.0819	20.6155	22.6827	23.4089	26.0958	29.164	29.6923
ENSMUSG00000029097	167.119	191.975	229.829	227.861	261.047	274.831	281.35	-0.379657	0.00748028	0.0446808	Trmt44	5	35556203	35575070	-	5154	protein_coding	tRNA methyltransferase 44 [Source:MGI Symbol;Acc:MGI:1926140]	-	145	208	232	254	273	262	278	4.65205	5.64079	7.07738	6.65084	7.03425	7.40558	7.38782
ENSMUSG00000036197	829.834	701.446	629.057	720.364	867.288	982.888	995.858	-0.379503	0.000660823	0.00684408	Gxylt1	15	93239742	93275179	-	6722	protein_coding	glucoside xylosyltransferase 1 [Source:MGI Symbol;Acc:MGI:2684933]	-	720	760	635	803	907	937	984	11.3596	10.1355	9.52604	10.3398	11.4926	13.0242	12.8594
ENSMUSG00000015165	6783.89	6431.15	6150.89	6982.06	8257.88	8776.76	8810.91	-0.379083	4.65791e-07	1.25471e-05	Hnrnpl	7	28808541	28822266	+	5953	protein_coding	heterogeneous nuclear ribonucleoprotein L [Source:MGI Symbol;Acc:MGI:104816]	-	5886	6968	6209	7783	8636	8367	8706	265.179	265.355	265.979	286.175	312.471	332.1	324.887
ENSMUSG00000105867	206.306	193.821	198.128	184.801	233.317	303.153	243.904	-0.379081	0.00632751	0.0396482	Gm42517	5	108366073	108367922	-	1850	protein_coding	predicted gene 42517 [Source:MGI Symbol;Acc:MGI:5662654]	-	179	210	200	206	244	289	241	6.57792	6.52312	6.98833	6.1783	7.20119	9.35653	7.3358
ENSMUSG00000031028	8176.17	8375.82	7522.93	7784.95	10259.2	10716.3	10251.1	-0.37893	8.1683e-08	2.67152e-06	Tub	7	108950338	109034460	+	8391	protein_coding	tubby bipartite transcription factor [Source:MGI Symbol;Acc:MGI:2651573]	Tub	7094	9075	7594	8678	10729	10216	10129	224.003	242.22	228.004	223.64	272.083	284.201	264.926
ENSMUSG00000072769	396.476	419.945	424.985	320.261	523.05	604.208	429.109	-0.378873	0.00674236	0.0415541	Gm10419	5	108367769	108378239	+	6859	lincRNA	predicted gene 10419 [Source:MGI Symbol;Acc:MGI:3642823]	-	344	455	429	357	547	576	424	12.2251	13.668	14.4963	10.3544	15.612	18.0342	12.4811
ENSMUSG00000032030	2258.99	2045.27	1878.26	2083.94	2465.12	2694.81	2977.45	-0.378866	8.05237e-05	0.00116724	Cul5	9	53614582	53670014	-	8165	protein_coding	cullin 5 [Source:MGI Symbol;Acc:MGI:1922967]	-	1960	2216	1896	2323	2578	2569	2942	53.1084	50.7548	48.8487	51.3715	56.1007	61.327	66.0305
ENSMUSG00000041044	5646.33	5102.1	4851.17	5831.09	6592.15	6953.64	7528.64	-0.378766	2.98561e-05	0.000505674	Lrit1	14	37054830	37064946	+	4325	protein_coding	leucine-rich repeat, immunoglobulin-like and transmembrane domains 1 [Source:MGI Symbol;Acc:MGI:2385320]	-	4899	5528	4897	6500	6894	6629	7439	77.0067	73.4497	73.1913	83.3875	87.0305	91.8016	96.857
ENSMUSG00000075273	365.357	455.94	392.294	375.881	534.525	571.69	469.591	-0.378762	0.00168428	0.0143074	Ttc30b	2	75935849	75938585	-	2737	protein_coding	tetratricopeptide repeat domain 30B [Source:MGI Symbol;Acc:MGI:1919671]	-	317	494	396	419	559	545	464	7.87394	10.3719	9.35267	8.49401	11.1512	11.9264	9.54653
ENSMUSG00000063450	7607.96	6955.39	6052.82	7227.86	7380.07	9458.59	10746	-0.378745	0.00178752	0.014981	Syne2	12	75818134	76110926	+	26726	protein_coding	spectrin repeat containing, nuclear envelope 2 [Source:MGI Symbol;Acc:MGI:2449316]	-	6601	7536	6110	8057	7718	9017	10618	102.645	99.0532	90.3392	102.251	96.3853	123.529	136.762
ENSMUSG00000025049	290.442	267.657	273.417	326.541	408.304	363.994	374.459	-0.378076	0.00182918	0.015261	Taf5	19	47067748	47083479	+	3258	protein_coding	TATA-box binding protein associated factor 5 [Source:MGI Symbol;Acc:MGI:2442144]	-	252	290	276	364	427	347	370	5.25844	5.11511	5.47612	6.19903	7.15588	6.37921	6.39518
ENSMUSG00000029413	413.764	521.47	453.714	441.369	685.607	589.523	538.411	-0.378072	0.0019153	0.0158111	Naaa	5	92257659	92278170	-	3721	protein_coding	N-acylethanolamine acid amidase [Source:MGI Symbol;Acc:MGI:1914361]	-	359	565	458	492	717	562	532	15.5553	20.6935	18.8694	17.3987	24.9507	21.4537	19.0937
ENSMUSG00000029513	2106.86	2351.69	1939.68	1972.7	3003.47	2665.44	2567.57	-0.377804	0.000101124	0.00141818	Prkab1	5	116013586	116024508	-	3066	protein_coding	protein kinase, AMP-activated, beta 1 non-catalytic subunit [Source:MGI Symbol;Acc:MGI:1336167]	-	1828	2548	1958	2199	3141	2541	2537	118.47	139.583	120.657	116.312	163.485	145.083	136.191
ENSMUSG00000029141	532.477	555.619	576.553	677.303	703.775	738.477	876.436	-0.377525	0.00150597	0.0131488	Slc4a1ap	5	31526995	31556932	+	5380	protein_coding	solute carrier family 4 (anion exchanger), member 1, adaptor protein [Source:MGI Symbol;Acc:MGI:1196608]	-	462	602	582	755	736	704	866	23.2829	25.6444	27.8886	31.0534	29.7887	31.2571	36.15
ENSMUSG00000068394	292.747	246.429	221.904	261.053	313.639	347.21	352.194	-0.377288	0.00358118	0.0256811	Cep152	2	125563088	125625113	-	5768	protein_coding	centrosomal protein 152 [Source:MGI Symbol;Acc:MGI:2139083]	-	254	267	224	291	328	331	348	2.99375	2.66008	2.51037	2.79925	3.10481	3.43709	3.39748
ENSMUSG00000024030	1823.33	1331.82	1191.74	1711.65	1812.03	1907.03	2311.52	-0.37706	0.00709275	0.0430655	Abcg1	17	31057698	31115777	+	4066	protein_coding	ATP binding cassette subfamily G member 1 [Source:MGI Symbol;Acc:MGI:107704]	-	1582	1443	1203	1908	1895	1818	2284	45.8248	35.3314	33.1335	45.1065	44.0841	46.3948	54.8006
ENSMUSG00000068154	885.156	998.638	830.157	990.388	1349.22	1137.09	1161.83	-0.376069	0.000352541	0.00406211	Insm1	2	146221921	146225020	+	3100	protein_coding	insulinoma-associated 1 [Source:MGI Symbol;Acc:MGI:1859980]	zf-C2H2	768	1082	838	1104	1411	1084	1148	16.8425	20.0573	17.4742	19.7597	24.8514	20.9438	20.8537
ENSMUSG00000030177	259.323	317.497	238.745	295.143	355.712	400.708	347.133	-0.375899	0.00437772	0.0298829	Ccdc77	6	120324323	120364374	-	6685	protein_coding	coiled-coil domain containing 77 [Source:MGI Symbol;Acc:MGI:1914450]	-	225	344	241	329	372	382	343	10.3564	13.384	10.5476	12.3592	13.7515	15.4907	13.0772
ENSMUSG00000027079	205.153	247.352	230.819	227.861	302.164	297.908	302.603	-0.375805	0.00230774	0.0182643	Clp1	2	84722104	84727350	-	2672	protein_coding	CLP1, cleavage and polyadenylation factor I subunit [Source:MGI Symbol;Acc:MGI:2138968]	-	178	268	233	254	316	284	299	6.38921	8.13135	7.95227	7.44093	9.10948	8.98105	8.88983
ENSMUSG00000038056	6846.13	5770.32	5062.18	5706.39	6667.69	7768.69	8634.81	-0.375762	0.0010362	0.00980229	Kmt2c	5	25271798	25498783	-	20291	protein_coding	lysine (K)-specific methyltransferase 2C [Source:MGI Symbol;Acc:MGI:2444959]	-	5940	6252	5110	6361	6973	7406	8532	77.1986	68.6819	63.1468	67.4705	72.7815	84.7984	91.8477
ENSMUSG00000043257	584.341	562.08	581.506	591.183	727.68	747.918	800.532	-0.375643	4.48529e-05	0.000711526	Pigv	4	133660387	133672647	-	4180	protein_coding	phosphatidylinositol glycan anchor biosynthesis, class V [Source:MGI Symbol;Acc:MGI:2442480]	-	507	609	587	659	761	713	791	18.3927	18.6748	20.2481	19.5114	22.1718	22.7881	23.7689
ENSMUSG00000039578	431.053	356.261	312.052	407.279	459.94	498.262	533.351	-0.375436	0.003565	0.0255854	Ccser1	6	61180324	62382865	+	9635	protein_coding	coiled-coil serine rich 1 [Source:MGI Symbol;Acc:MGI:3045354]	-	374	386	315	454	481	475	527	13.8789	12.1079	11.1148	13.75	14.3353	15.5295	16.199
ENSMUSG00000079553	187.865	148.596	183.269	183.904	223.755	249.656	225.687	-0.375205	0.00755504	0.0449668	Kifc1	17	33875666	33890661	-	3407	protein_coding	kinesin family member C1 [Source:MGI Symbol;Acc:MGI:109596]	-	163	161	185	205	234	238	223	7.43719	6.20937	8.02603	7.63381	8.57464	9.56708	8.42793
ENSMUSG00000040029	1250.51	1305.06	1088.71	1150.07	1462.05	1643.74	1600.05	-0.374922	7.8451e-05	0.0011429	Ipo8	6	148770683	148831467	-	15793	protein_coding	importin 8 [Source:MGI Symbol;Acc:MGI:2444611]	-	1085	1414	1099	1282	1529	1567	1581	26.7256	29.4407	25.7397	25.7723	30.2472	34.0054	32.2571
ENSMUSG00000037795	1341.56	1244.14	1031.26	1180.57	1448.67	1684.65	1583.86	-0.374379	0.00039531	0.00448324	N4bp2	5	65763521	65830108	+	14946	protein_coding	NEDD4 binding protein 2 [Source:MGI Symbol;Acc:MGI:2684414]	-	1164	1348	1041	1316	1515	1606	1565	26.7072	26.1436	22.7109	24.6432	27.9169	32.464	29.743
ENSMUSG00000014778	446.036	482.706	543.862	458.413	538.35	682.881	687.182	-0.374294	0.00211398	0.0171097	Fhod1	8	105329163	105347953	-	4666	protein_coding	formin homology 2 domain containing 1 [Source:MGI Symbol;Acc:MGI:2679008]	-	387	523	549	511	563	651	679	11.0778	12.6545	14.9425	11.938	12.9429	16.4175	16.0994
ENSMUSG00000019139	447.188	511.317	433.901	445.854	709.512	566.445	539.423	-0.374017	0.00231944	0.0183359	Isyna1	8	70594373	70597290	+	2436	protein_coding	myo-inositol 1-phosphate synthase A1 [Source:MGI Symbol;Acc:MGI:1919030]	-	388	554	438	497	742	540	533	24.4466	29.505	26.2403	25.5569	37.5464	29.9751	27.8169
ENSMUSG00000038718	968.139	982.948	747.934	815.455	1215.35	1120.3	1122.36	-0.373409	0.000886657	0.00864634	Pbx3	2	34171457	34373142	-	6109	protein_coding	pre B cell leukemia homeobox 3 [Source:MGI Symbol;Acc:MGI:97496]	Homeobox	840	1065	755	909	1271	1068	1109	43.1319	46.2242	36.8616	38.0934	52.4136	48.3139	47.1678
ENSMUSG00000036158	727.257	694.985	613.207	765.218	878.762	923.096	948.291	-0.373238	0.000246997	0.00300143	Prickle1	15	93499114	93595891	-	4345	protein_coding	prickle planar cell polarity protein 1 [Source:MGI Symbol;Acc:MGI:1916034]	-	631	753	619	853	919	880	937	10.4273	10.5181	9.72617	11.5042	12.1966	12.8117	12.8256
ENSMUSG00000026313	641.969	575.924	529.002	559.784	648.314	780.436	843.038	-0.372856	0.00144754	0.0127519	Hdac4	1	91928779	92195699	-	15813	protein_coding	histone deacetylase 4 [Source:MGI Symbol;Acc:MGI:3036234]	-	557	624	534	624	678	744	833	17.0037	16.1017	15.5002	15.5467	16.6225	20.0097	21.0633
ENSMUSG00000049091	505.968	408.869	424.985	444.06	622.497	529.731	601.158	-0.372801	0.00110983	0.0103629	Sephs2	7	127271879	127274055	-	2177	protein_coding	selenophosphate synthetase 2 [Source:MGI Symbol;Acc:MGI:108388]	-	439	443	429	495	651	505	594	13.7092	11.6937	12.7384	12.616	16.3271	13.8938	15.3649
ENSMUSG00000042625	1915.53	2234.48	2293.33	2230.17	2483.29	2950.76	3080.68	-0.372685	0.000238646	0.00292362	Safb2	17	56560965	56584585	-	8165	protein_coding	scaffold attachment factor B2 [Source:MGI Symbol;Acc:MGI:2146808]	-	1662	2421	2315	2486	2597	2813	3044	89.1788	109.806	118.111	108.867	111.913	132.979	135.291
ENSMUSG00000053134	531.324	480.86	502.255	540.048	688.475	638.825	686.17	-0.372585	0.000142997	0.00190603	Supt7l	5	31514564	31527807	-	6994	protein_coding	suppressor of Ty 7-like [Source:MGI Symbol;Acc:MGI:1919445]	-	461	521	507	602	720	609	678	14.3567	13.7149	15.0131	15.3009	18.008	16.7091	17.4895
ENSMUSG00000038425	269.696	271.349	240.726	265.539	384.399	328.329	319.808	-0.371983	0.00266376	0.0204699	Poli	18	70508680	70530620	-	3863	protein_coding	polymerase (DNA directed), iota [Source:MGI Symbol;Acc:MGI:1347081]	-	234	294	243	296	402	313	316	5.57403	5.91972	5.50386	5.75455	7.69057	6.56869	6.23499
ENSMUSG00000004880	329.628	341.494	308.089	301.422	347.106	482.528	437.206	-0.371784	0.00469594	0.0316831	Lbr	1	181815335	181843046	-	4761	protein_coding	lamin B receptor [Source:MGI Symbol;Acc:MGI:2138281]	-	286	370	311	336	363	460	432	16.6611	18.2196	17.2268	15.975	16.9833	23.6089	20.8456
ENSMUSG00000015542	281.221	310.113	330.874	302.319	447.509	402.806	357.254	-0.371524	0.00245085	0.0191862	Nat9	11	115182832	115187859	-	2066	protein_coding	N-acetyltransferase 9 (GCN5-related, putative) [Source:MGI Symbol;Acc:MGI:1913426]	-	244	336	334	337	468	384	353	19.9616	23.2352	25.9813	22.501	30.749	27.677	23.9208
ENSMUSG00000024242	2672.76	2732.87	2343.86	2313.6	3266.43	3418.6	3152.54	-0.37108	3.26415e-05	0.000544155	Map4k3	17	80580512	80728093	-	4231	protein_coding	mitogen-activated protein kinase kinase kinase kinase 3 [Source:MGI Symbol;Acc:MGI:2154405]	-	2319	2961	2366	2579	3416	3259	3115	37.2884	40.2449	36.1739	33.8446	44.1133	46.1677	41.4883
ENSMUSG00000061666	541.697	462.401	492.349	425.221	636.84	677.637	572.821	-0.370968	0.00128729	0.0116633	Gdpd1	11	87033867	87074062	-	2336	protein_coding	glycerophosphodiester phosphodiesterase domain containing 1 [Source:MGI Symbol;Acc:MGI:1913819]	-	470	501	497	474	666	646	566	13.6783	12.3246	13.753	11.2585	15.5664	16.5634	13.6441
ENSMUSG00000031563	2328.14	2260.32	1913.92	2206.84	2770.16	2768.24	2974.42	-0.370744	3.55588e-05	0.000586281	Wwc2	8	47823959	47990924	-	13784	protein_coding	WW, C2 and coiled-coil domain containing 2 [Source:MGI Symbol;Acc:MGI:1261872]	-	2020	2449	1932	2460	2897	2639	2939	19.2471	19.7244	17.5036	19.13	22.1687	22.1531	23.1957
ENSMUSG00000030752	179.797	198.435	212.988	252.98	284.952	270.635	282.362	-0.37018	0.0082374	0.0478704	Kdm8	7	125444676	125462269	+	2389	protein_coding	lysine (K)-specific demethylase 8 [Source:MGI Symbol;Acc:MGI:1924285]	-	156	215	215	282	298	258	279	7.09399	8.26428	9.29635	10.466	10.8833	10.3363	10.5091
ENSMUSG00000032249	6978.67	8182.92	6970.15	7137.25	10216.2	9436.56	8937.42	-0.370138	2.41762e-05	0.000421762	Anp32a	9	62341293	62378812	+	3166	protein_coding	acidic (leucine-rich) nuclear phosphoprotein 32 family, member A [Source:MGI Symbol;Acc:MGI:108447]	-	6055	8866	7036	7956	10684	8996	8831	502.005	621.329	554.661	538.337	711.388	657.089	606.455
ENSMUSG00000027281	295.052	232.585	264.501	217.096	292.602	356.651	348.145	-0.369792	0.0080954	0.0472433	Slx4ip	2	136891218	137071950	+	5905	protein_coding	SLX4 interacting protein [Source:MGI Symbol;Acc:MGI:1921493]	-	256	252	267	242	306	340	344	5.946	4.9475	5.89663	4.58739	5.70801	6.95736	6.61817
ENSMUSG00000050315	864.41	739.287	548.815	712.29	837.645	929.39	1066.7	-0.369631	0.00774724	0.0458349	Synpo2	3	123076519	123236149	-	13138	protein_coding	synaptopodin 2 [Source:MGI Symbol;Acc:MGI:2153070]	-	750	801	554	794	876	886	1054	10.9959	9.92666	7.72303	9.50073	10.3146	11.4442	12.7999
ENSMUSG00000025759	328.476	371.028	304.127	352.557	513.488	446.863	378.507	-0.36959	0.00477	0.0320269	Mfsd8	3	40818103	40846886	-	9414	protein_coding	major facilitator superfamily domain containing 8 [Source:MGI Symbol;Acc:MGI:1919425]	-	285	402	307	393	537	426	374	10.6517	12.6999	10.9099	11.9876	16.1186	14.027	11.5782
ENSMUSG00000033961	478.307	553.773	566.647	494.297	653.095	714.351	684.146	-0.369199	0.000389421	0.00442761	Zfp446	7	12977848	12985714	+	7175	protein_coding	zinc finger protein 446 [Source:MGI Symbol;Acc:MGI:2442185]	zf-C2H2	415	600	572	551	683	681	676	8.51083	10.401	11.1539	9.22235	11.2492	12.3042	11.4833
ENSMUSG00000034371	305.425	327.649	268.464	261.95	419.779	352.455	373.447	-0.369139	0.00387454	0.0272215	Tkfc	19	10592200	10604258	-	2253	protein_coding	triokinase, FMN cyclase [Source:MGI Symbol;Acc:MGI:2385084]	-	265	355	271	292	439	336	369	7.99636	9.05472	7.77541	7.1911	10.6387	8.93237	9.2229
ENSMUSG00000029128	2184.08	2587.04	2370.6	2048.06	3232.97	3160.56	2613.11	-0.369003	0.000586626	0.00620035	Rab28	5	41624976	41708157	-	4529	protein_coding	RAB28, member RAS oncogene family [Source:MGI Symbol;Acc:MGI:1917285]	-	1895	2803	2393	2283	3381	3013	2582	83.3311	104.189	100.057	81.9351	119.405	116.729	94.0479
ENSMUSG00000036469	1975.47	1471.19	1398.79	1744.84	2009.97	2111.58	2356.05	-0.368637	0.00228509	0.0181208	2020-03-01	8	65617900	66471637	+	7146	protein_coding	membrane-associated ring finger (C3HC4) 1 [Source:MGI Symbol;Acc:MGI:1920175]	-	1714	1594	1412	1945	2102	2013	2328	36.5396	28.7238	28.6217	33.8406	35.9886	37.8075	41.1084
ENSMUSG00000041346	282.374	291.654	261.529	244.906	353.8	315.741	393.688	-0.368285	0.00384968	0.0270701	Wrap53	11	69561758	69580255	-	2062	protein_coding	WD repeat containing, antisense to Trp53 [Source:MGI Symbol;Acc:MGI:2384933]	-	245	316	264	273	370	301	389	13.4977	14.7157	13.8294	12.275	16.3709	14.6097	17.7516
ENSMUSG00000097353	195.933	263.042	231.81	230.552	329.894	307.349	274.266	-0.368095	0.00702224	0.0428102	A430046D13Rik	10	128499364	128504242	+	1997	lincRNA	Riken cDNA A430046D13 gene [Source:MGI Symbol;Acc:MGI:3609643]	-	170	285	234	257	345	293	271	5.78733	8.20115	7.57449	7.1405	9.43251	8.78776	7.64176
ENSMUSG00000029068	1840.62	2405.22	2473.63	2049.85	2798.84	3209.86	2599.96	-0.367687	0.00161029	0.0138714	Ccnl2	4	155812489	155824543	+	5278	protein_coding	cyclin L2 [Source:MGI Symbol;Acc:MGI:1927119]	-	1597	2606	2497	2285	2927	3060	2569	42.4104	58.4982	63.0513	49.5245	62.4265	71.5929	56.5102
ENSMUSG00000049739	980.817	746.671	875.727	1015.51	1012.63	1175.9	1375.38	-0.367631	0.00441719	0.0301067	Zfp646	7	127876221	127885996	+	9723	protein_coding	zinc finger protein 646 [Source:MGI Symbol;Acc:MGI:3665412]	zf-C2H2	851	809	884	1132	1059	1121	1359	13.2028	10.6092	13.0405	14.3333	13.195	15.3222	17.4642
ENSMUSG00000054469	632.748	687.602	522.068	611.816	803.221	770.995	829.881	-0.367506	0.00080497	0.00799473	Lclat1	17	73107985	73243368	+	4894	protein_coding	lysocardiolipin acyltransferase 1 [Source:MGI Symbol;Acc:MGI:2684937]	-	549	745	527	682	840	735	820	26.7359	30.6675	24.4028	27.1064	32.8534	31.5348	33.0774
ENSMUSG00000085334	590.104	541.775	555.75	603.742	612.934	836.032	802.556	-0.367453	0.00225681	0.0179862	Gm12940	4	127033731	127049398	+	2680	processed_transcript	predicted gene 12940 [Source:MGI Symbol;Acc:MGI:3702626]	-	512	587	561	673	641	797	793	41.736	40.4464	43.4823	44.7736	41.9641	57.2375	53.5438
ENSMUSG00000063457	3036.96	4506.79	3916	3415.22	5624.46	4683.66	4337.65	-0.366857	0.00460367	0.0311539	Rps15	10	80292453	80294114	+	630	protein_coding	ribosomal protein S15 [Source:MGI Symbol;Acc:MGI:98117]	-	2635	4883	3953	3807	5882	4465	4286	334.213	523.516	476.735	394.087	599.165	498.936	450.287
ENSMUSG00000027332	1544.41	1741.62	1473.08	1525.95	1872.27	2160.88	2094.94	-0.36577	8.5905e-05	0.00123354	Ivd	2	118861954	118882909	+	5505	protein_coding	isovaleryl coenzyme A dehydrogenase [Source:MGI Symbol;Acc:MGI:1929242]	-	1340	1887	1487	1701	1958	2060	2070	85.8612	102.203	90.5964	88.9534	100.759	116.289	109.864
ENSMUSG00000043467	1589.36	1361.36	1485.96	1603.1	1616	2092.7	2206.27	-0.365366	0.0014701	0.012917	Zbtb37	1	161002922	161034849	-	18814	protein_coding	zinc finger and BTB domain containing 37 [Source:MGI Symbol;Acc:MGI:2444467]	ZBTB	1379	1475	1500	1787	1690	1995	2180	19.4826	17.6147	20.1503	20.605	19.1755	24.8317	25.5113
ENSMUSG00000020482	928.953	1090.01	917.334	1236.19	1294.72	1339.54	1455.33	-0.365152	0.00161456	0.0138879	Ccdc117	11	5528887	5542187	-	3372	protein_coding	coiled-coil domain containing 117 [Source:MGI Symbol;Acc:MGI:2144383]	-	806	1181	926	1378	1354	1277	1438	16.2501	20.1266	17.7517	22.6744	21.9239	22.6826	24.0145
ENSMUSG00000040040	459.866	429.174	410.125	478.149	563.211	619.943	553.592	-0.365017	0.000595898	0.00627992	Ift88	14	57424062	57517936	+	4628	protein_coding	intraflagellar transport 88 [Source:MGI Symbol;Acc:MGI:98715]	-	399	465	414	533	589	591	547	14.7023	14.4832	14.5051	16.0289	17.4303	19.1858	16.6953
ENSMUSG00000034601	553.223	406.1	384.369	458.413	580.423	536.025	655.809	-0.364954	0.00676868	0.041645	2700049A03Rik	12	71136848	71243303	+	5879	protein_coding	RIKEN cDNA 2700049A03 gene [Source:MGI Symbol;Acc:MGI:1924217]	-	480	440	388	511	607	511	648	9.15868	7.09651	7.03933	7.95753	9.30163	8.59001	10.2415
ENSMUSG00000034333	277.764	208.588	224.876	277.201	332.763	328.329	311.712	-0.364907	0.00740525	0.0444685	Zbed4	15	88751660	88784516	+	5764	protein_coding	zinc finger, BED type containing 4 [Source:MGI Symbol;Acc:MGI:2682302]	zf-BED	241	226	227	309	348	313	308	5.47966	4.34355	4.90761	5.73404	6.35469	6.26992	5.80072
ENSMUSG00000022742	533.629	587	577.544	670.127	790.79	769.946	753.978	-0.364887	0.000434981	0.00483279	Cpox	16	58670292	58717636	+	6661	protein_coding	coproporphyrinogen oxidase [Source:MGI Symbol;Acc:MGI:104841]	-	463	636	583	747	827	734	745	21.2536	24.678	25.4465	27.9859	30.4886	29.6845	28.3272
ENSMUSG00000020538	1924.75	1888.37	1661.31	1743.94	2654.46	2249	2134.41	-0.364607	0.000265962	0.00319954	Srebf1	11	60199089	60222581	-	5634	protein_coding	sterol regulatory element binding transcription factor 1 [Source:MGI Symbol;Acc:MGI:107606]	bHLH	1670	2046	1677	1944	2776	2144	2109	77.4972	80.2557	73.9964	73.6262	103.459	87.6548	81.0665
ENSMUSG00000025894	376.883	463.324	443.807	435.986	573.73	560.152	548.531	-0.364479	0.000694938	0.00712776	Aasdhppt	9	4294793	4309471	-	2847	protein_coding	aminoadipate-semialdehyde dehydrogenase-phosphopantetheinyl transferase [Source:MGI Symbol;Acc:MGI:1914868]	-	327	502	448	486	600	534	542	8.16109	10.5902	10.6313	9.89926	12.0263	11.7415	11.2046
ENSMUSG00000057315	1633.16	1498.88	1212.54	1462.26	1959.29	1831.51	1875.33	-0.36436	0.000494329	0.00538592	Arhgap24	5	102481391	102897937	+	8792	protein_coding	Rho GTPase activating protein 24 [Source:MGI Symbol;Acc:MGI:1922647]	-	1417	1624	1224	1630	2049	1746	1853	32.5671	31.5497	26.7484	30.5747	37.8207	35.3537	35.276
ENSMUSG00000062906	340.001	399.64	350.687	326.541	526.875	453.156	409.88	-0.363682	0.00381442	0.0268987	Hdac10	15	89123307	89128700	-	3379	protein_coding	histone deacetylase 10 [Source:MGI Symbol;Acc:MGI:2158340]	-	295	433	354	364	551	432	405	9.68856	12.0206	11.0547	9.75674	14.5334	12.4998	11.0176
ENSMUSG00000022855	2291.26	2163.41	2215.07	2184.42	2729.04	2974.89	2883.33	-0.363656	6.5251e-07	1.69681e-05	Senp2	16	22009484	22049269	+	6901	protein_coding	SUMO/sentrin specific peptidase 2 [Source:MGI Symbol;Acc:MGI:1923076]	-	1988	2344	2236	2435	2854	2836	2849	60.3359	60.1336	64.5266	60.3149	69.5652	75.831	71.6221
ENSMUSG00000038644	336.544	357.184	329.883	388.44	442.728	450.009	488.82	-0.363544	0.00117807	0.0108984	Pold1	7	44532746	44548849	-	4859	protein_coding	polymerase (DNA directed), delta 1, catalytic subunit [Source:MGI Symbol;Acc:MGI:97741]	-	292	387	333	433	463	429	483	12.0457	13.4947	13.0618	14.5782	15.3395	15.5915	16.5041
ENSMUSG00000031982	176.34	200.281	192.184	215.302	248.616	263.292	260.097	-0.363453	0.00541788	0.0352444	Arv1	8	124722139	124734123	+	1652	protein_coding	ARV1 homolog, fatty acid homeostasis modulator [Source:MGI Symbol;Acc:MGI:1916115]	-	153	217	194	240	260	251	257	10.4329	12.5076	12.5783	13.3564	14.2385	15.0788	14.5158
ENSMUSG00000032418	2547.13	2296.31	1868.35	2209.53	3110.57	2772.44	2815.52	-0.362548	0.000682289	0.00702327	Me1	9	86581371	86695953	-	3848	protein_coding	malic enzyme 1, NADP(+)-dependent, cytosolic [Source:MGI Symbol;Acc:MGI:97043]	-	2210	2488	1886	2463	3253	2643	2782	76.1891	72.5022	61.823	69.2996	90.0665	80.2747	79.4424
ENSMUSG00000041147	396.476	287.962	316.015	354.351	400.654	458.401	469.591	-0.362519	0.00565939	0.0365679	Brca2	5	150522630	150570329	+	13643	protein_coding	breast cancer 2, early onset [Source:MGI Symbol;Acc:MGI:109337]	-	344	312	319	395	419	437	464	9.13894	7.00636	8.05816	8.56447	8.93985	10.2282	10.2106
ENSMUSG00000022228	1855.6	1582.87	1496.86	1758.3	1921.04	2255.29	2346.95	-0.362078	0.00058627	0.00620035	Zscan26	13	21442180	21453730	-	4366	protein_coding	zinc finger and SCAN domain containing 26 [Source:MGI Symbol;Acc:MGI:3531417]	zf-C2H2	1610	1715	1511	1960	2009	2150	2319	26.4255	23.7937	23.5814	26.2554	26.4823	31.0897	31.5278
ENSMUSG00000038886	13704.9	12409.1	11505.3	13044.6	15213.4	16068.2	17921.4	-0.361666	5.22644e-05	0.000809156	Man2a2	7	80349097	80371375	-	10317	protein_coding	mannosidase 2, alpha 2 [Source:MGI Symbol;Acc:MGI:2150656]	-	11891	13445	11614	14541	15910	15318	17708	345.47	330.182	320.835	344.788	371.228	392.08	426.144
ENSMUSG00000003585	713.427	965.411	723.168	807.381	1063.31	1009.11	1064.68	-0.361641	0.00171641	0.014515	Sec14l2	11	4097039	4123415	-	3505	protein_coding	SEC14-like lipid binding 2 [Source:MGI Symbol;Acc:MGI:1915065]	-	619	1046	730	900	1112	962	1052	35.0101	50.0075	39.2585	41.5443	50.5111	47.9357	49.2849
ENSMUSG00000030980	704.206	574.078	615.188	665.641	764.016	780.436	953.352	-0.361422	0.00170644	0.0144578	Knop1	7	118842222	118856254	-	5880	protein_coding	lysine rich nucleolar protein 1 [Source:MGI Symbol;Acc:MGI:1913606]	-	611	622	621	742	799	744	942	13.1243	11.2934	12.6833	13.0078	13.7835	14.0795	16.7602
ENSMUSG00000052557	881.698	725.443	741	864.795	916.055	1057.36	1162.85	-0.361269	0.00163137	0.0139662	Gan	8	117158135	117215997	+	13463	protein_coding	giant axonal neuropathy [Source:MGI Symbol;Acc:MGI:1890619]	-	765	786	748	964	958	1008	1149	6.45579	5.60675	6.00202	6.63943	6.49281	7.49428	8.03162
ENSMUSG00000022401	478.307	379.335	395.266	373.19	498.188	557.005	531.326	-0.361207	0.00228074	0.0180983	Xpnpep3	15	81400138	81457482	+	7595	protein_coding	X-prolyl aminopeptidase 3, mitochondrial [Source:MGI Symbol;Acc:MGI:2445217]	-	415	411	399	416	521	531	525	13.2085	11.0573	12.075	10.806	13.3175	14.8896	13.8408
ENSMUSG00000026283	406.849	344.262	420.032	422.53	494.364	480.43	582.941	-0.361097	0.00276612	0.021149	Ing5	1	93803965	93822101	+	4729	protein_coding	inhibitor of growth family, member 5 [Source:MGI Symbol;Acc:MGI:1922816]	-	353	373	424	471	517	458	576	7.20889	6.43877	8.23318	7.8502	8.47936	8.24025	9.74341
ENSMUSG00000041483	1649.29	1412.12	1448.32	1662.31	1883.75	1911.23	2206.27	-0.360863	0.000267786	0.00321719	Zfp281	1	136624901	136630053	+	4937	protein_coding	zinc finger protein 281 [Source:MGI Symbol;Acc:MGI:3029290]	zf-C2H2	1431	1530	1462	1853	1970	1822	2180	19.7133	17.8161	19.1503	20.8335	21.7954	22.1131	24.8755
ENSMUSG00000035513	3075	2658.11	2476.6	2997.18	3094.31	3849.73	3971.29	-0.35937	0.00117195	0.0108566	Ntng2	2	29194541	29253005	-	3990	protein_coding	netrin G2 [Source:MGI Symbol;Acc:MGI:2159341]	-	2668	2880	2500	3341	3236	3670	3924	148.552	135.545	132.355	151.822	144.704	180.028	180.974
ENSMUSG00000023051	458.714	549.158	555.75	468.281	742.98	656.657	583.953	-0.358736	0.00291271	0.0220083	Tarbp2	15	102518192	102523676	+	4549	protein_coding	TARBP2, RISC loading complex RNA binding subunit [Source:MGI Symbol;Acc:MGI:103027]	-	398	595	561	522	777	626	577	25.8431	32.6571	34.6363	27.6629	40.5192	35.811	31.0336
ENSMUSG00000026004	516.341	474.399	458.667	489.811	617.715	603.159	660.869	-0.358651	0.000305377	0.00360157	Kansl1l	1	66719248	66817562	-	6664	protein_coding	KAT8 regulatory NSL complex subunit 1-like [Source:MGI Symbol;Acc:MGI:1915941]	-	448	514	463	546	646	575	653	10.3807	10.0673	10.2008	10.3254	12.0215	11.7381	12.533
ENSMUSG00000024052	2010.04	1957.59	1567.19	1797.77	2183.04	2495.51	2446.13	-0.358618	0.000498531	0.00542514	Lpin2	17	71182560	71249817	+	12233	protein_coding	lipin 2 [Source:MGI Symbol;Acc:MGI:1891341]	-	1744	2121	1582	2004	2283	2379	2417	63.6416	65.4238	54.892	59.6841	66.9082	76.4839	73.0577
ENSMUSG00000036885	2080.35	1744.39	1369.07	1525.05	2134.27	2131.51	2294.32	-0.358112	0.00416432	0.028731	Arhgef26	3	62338344	62462221	+	10116	protein_coding	Rho guanine nucleotide exchange factor (GEF) 26 [Source:MGI Symbol;Acc:MGI:1918053]	-	1805	1890	1382	1700	2232	2032	2267	54.034	47.8247	39.3375	41.5341	53.6616	53.5914	56.213
ENSMUSG00000027130	1998.52	2054.5	1969.39	1900.93	2562.66	2639.22	2453.21	-0.35794	1.37765e-06	3.387e-05	Slc12a6	2	112265825	112363163	+	10165	protein_coding	solute carrier family 12, member 6 [Source:MGI Symbol;Acc:MGI:2135960]	-	1734	2226	1988	2119	2680	2516	2424	35.0325	38.0144	38.1897	34.9397	43.4847	44.7831	40.5649
ENSMUSG00000030256	1694.24	1346.59	1190.75	1551.07	1848.37	1807.38	1973.5	-0.357119	0.00217366	0.0174873	Bhlhe41	6	145858243	145865558	-	6720	protein_coding	basic helix-loop-helix family, member e41 [Source:MGI Symbol;Acc:MGI:1930704]	bHLH	1470	1459	1202	1729	1933	1723	1950	39.6259	33.2444	30.8088	38.0385	41.8478	40.9194	43.5403
ENSMUSG00000028890	845.969	650.684	762.794	877.354	910.317	1010.16	1137.54	-0.356922	0.00335822	0.0244223	Mtf1	4	124802104	124849800	+	8907	protein_coding	metal response element binding transcription factor 1 [Source:MGI Symbol;Acc:MGI:101786]	zf-C2H2	734	705	770	978	952	963	1124	14.3805	11.6753	14.3442	15.6381	14.9794	16.6221	18.2406
ENSMUSG00000032570	2776.49	2734.72	2450.85	2618.61	3124.91	3493.08	3616.06	-0.356917	3.08583e-05	0.000521667	Atp2c1	9	105403539	105527319	-	9694	protein_coding	ATPase, Ca++-sequestering [Source:MGI Symbol;Acc:MGI:1889008]	-	2409	2963	2474	2919	3268	3330	3573	89.5428	93.0949	87.4382	88.5511	97.5562	109.048	110.007
ENSMUSG00000063659	3017.37	3061.44	2622.23	2910.16	3800	3901.13	3527	-0.356894	2.35704e-05	0.000412791	Zbtb18	1	177442351	177450764	+	6138	protein_coding	zinc finger and BTB domain containing 18 [Source:MGI Symbol;Acc:MGI:1353609]	ZBTB	2618	3317	2647	3244	3974	3719	3485	105.253	112.722	101.187	106.441	128.313	131.726	116.054
ENSMUSG00000024851	16172.5	14771.9	13408.3	14965.3	18739	18816.5	19705.6	-0.355335	1.05655e-05	0.00020342	Pitpnm1	19	4099998	4113965	+	6889	protein_coding	phosphatidylinositol transfer protein, membrane-associated 1 [Source:MGI Symbol;Acc:MGI:1197524]	-	14032	16005	13535	16682	19597	17938	19471	523.575	504.795	480.203	508.011	587.256	589.677	601.786
ENSMUSG00000028696	291.594	296.269	292.239	269.127	388.224	376.581	351.182	-0.355049	0.00179478	0.0150157	Ipp	4	116507549	116538243	+	2126	protein_coding	IAP promoted placental gene [Source:MGI Symbol;Acc:MGI:96581]	-	253	321	295	300	406	359	347	8.12854	8.71761	9.01201	7.86646	10.476	10.1617	9.23456
ENSMUSG00000030695	28310	28774.1	27186.2	28676.4	38176.9	36720.3	33929	-0.354779	4.64365e-07	1.25274e-05	Aldoa	7	126795234	126800751	-	2911	protein_coding	aldolase A, fructose-bisphosphate [Source:MGI Symbol;Acc:MGI:87994]	-	24563	31176	27443	31966	39925	35006	33525	1611.87	1729.29	1712.33	1711.99	2104.12	2023.82	1822.26
ENSMUSG00000027601	1892.48	1945.59	1728.67	1910.8	2348.47	2561.59	2307.48	-0.354482	1.7756e-05	0.000320623	Mtfr1	3	19187327	19220817	+	4372	protein_coding	mitochondrial fission regulator 1 [Source:MGI Symbol;Acc:MGI:1914722]	-	1642	2108	1745	2130	2456	2442	2280	83.2438	90.3337	84.1167	88.1301	99.9968	109.07	95.7433
ENSMUSG00000024924	7226.47	5952.14	5097.84	6572.98	7327.48	7861	8955.63	-0.354007	0.00243675	0.0191008	Vldlr	19	27216484	27254231	+	10068	protein_coding	very low density lipoprotein receptor [Source:MGI Symbol;Acc:MGI:98935]	-	6270	6449	5146	7327	7663	7494	8849	136.578	118.743	106.584	130.258	134.058	143.816	159.662
ENSMUSG00000032534	879.393	842.658	784.588	943.739	1048.01	1231.49	1062.65	-0.35391	0.000542102	0.00581155	Cep63	9	102584588	102626534	-	9598	protein_coding	centrosomal protein 63 [Source:MGI Symbol;Acc:MGI:2158560]	-	763	913	792	1052	1096	1174	1050	30.9129	31.267	30.5104	34.7854	35.6619	41.9049	35.2371
ENSMUSG00000024590	839.054	762.361	635.992	788.543	1048.01	980.79	904.773	-0.353325	0.00155504	0.0135053	Lmnb1	18	56707813	56753424	+	2962	protein_coding	lamin B1 [Source:MGI Symbol;Acc:MGI:96795]	-	728	826	642	879	1096	935	894	28.2652	27.1083	23.7009	27.8533	34.1752	31.9826	28.7511
ENSMUSG00000021843	5324.77	4913.81	4311.27	4848.77	5612.03	6524.61	6608.69	-0.353066	0.000222639	0.00276512	Ktn1	14	47648448	47739894	+	12912	protein_coding	kinectin 1 [Source:MGI Symbol;Acc:MGI:109153]	-	4620	5324	4352	5405	5869	6220	6530	89.3053	86.9909	79.9893	85.2701	91.1125	105.927	104.555
ENSMUSG00000035139	738.783	716.213	764.775	828.015	965.778	965.055	1013.06	-0.352947	0.000114859	0.00158126	Secisbp2	13	51651697	51684044	+	4626	protein_coding	SECIS binding protein 2 [Source:MGI Symbol;Acc:MGI:1922670]	-	641	776	772	923	1010	920	1001	32.9386	33.7062	37.7201	38.7093	41.6819	41.6501	42.6066
ENSMUSG00000006599	1062.65	1004.18	982.716	1066.64	1323.4	1330.1	1312.63	-0.352879	1.20434e-05	0.000227261	Gtf2h1	7	46796103	46823800	+	2984	protein_coding	general transcription factor II H, polypeptide 1 [Source:MGI Symbol;Acc:MGI:1277216]	-	922	1088	992	1189	1384	1268	1297	40.2578	40.1558	41.1849	42.3708	48.5326	48.7775	46.9087
ENSMUSG00000026436	626.986	512.24	559.712	528.386	596.679	714.351	858.219	-0.352853	0.00664337	0.0411409	Elk4	1	132007607	132032612	+	6407	protein_coding	ELK4, member of ETS oncogene family [Source:MGI Symbol;Acc:MGI:102853]	ETS	544	555	565	589	624	681	848	24.3954	21.0379	24.0915	21.5571	22.4736	26.9052	31.4992
ENSMUSG00000046753	518.646	501.165	450.742	462.899	538.35	644.069	693.255	-0.352217	0.00242981	0.0190546	Ccdc66	14	27481090	27508460	-	4512	protein_coding	coiled-coil domain containing 66 [Source:MGI Symbol;Acc:MGI:2443639]	-	450	543	455	516	563	614	685	12.6889	12.9423	12.1991	11.8748	12.7496	15.2532	15.9991
ENSMUSG00000038122	850.58	822.353	705.336	788.543	849.12	999.671	1231.67	-0.351986	0.00527676	0.034574	Tbc1d32	10	56014293	56228689	-	10556	protein_coding	TBC1 domain family, member 32 [Source:MGI Symbol;Acc:MGI:2442827]	-	738	891	712	879	888	953	1217	10.605	10.8226	9.72842	10.3088	10.2482	12.065	14.4857
ENSMUSG00000032097	5290.19	4633.24	4138.9	4829.04	5757.38	5798.72	6688.64	-0.351312	0.000406337	0.0045881	Ddx6	9	44604892	44640731	+	8035	protein_coding	DEAD (Asp-Glu-Ala-Asp) box polypeptide 6 [Source:MGI Symbol;Acc:MGI:104976]	-	4590	5020	4178	5383	6021	5528	6609	60.0321	55.4977	51.9574	57.4595	63.2439	63.6972	71.5982
ENSMUSG00000043866	446.036	497.473	453.714	440.471	608.153	609.453	558.652	-0.351105	0.000573345	0.00608495	Taf10	7	105739393	105744361	-	4584	protein_coding	TATA-box binding protein associated factor 10 [Source:MGI Symbol;Acc:MGI:1346320]	-	387	539	458	491	636	581	552	17.4933	20.5944	19.6849	18.1137	23.0885	23.1375	20.6678
ENSMUSG00000087694	597.019	575.924	571.6	614.507	702.819	761.554	812.677	-0.350784	0.000287263	0.00341701	A530058N18Rik	2	114013602	114032292	+	5470	processed_transcript	RIKEN cDNA A530058N18 gene [Source:MGI Symbol;Acc:MGI:2444858]	-	518	624	577	685	735	726	803	28.0604	28.5725	29.7199	30.2845	31.9764	34.6483	36.0308
ENSMUSG00000043456	1437.23	1211.84	1062.96	1266.69	1495.52	1612.27	1706.32	-0.350523	0.00127085	0.011555	Zfp536	7	37472135	37773641	-	9218	protein_coding	zinc finger protein 536 [Source:MGI Symbol;Acc:MGI:1926102]	zf-C2H2	1247	1313	1073	1412	1564	1537	1686	34.5321	30.7341	28.2529	31.9122	34.7834	37.4982	38.6731
ENSMUSG00000048106	1421.09	1317.98	1229.39	1521.47	1585.41	1870.32	1848	-0.350455	0.000622402	0.00652021	4632415L05Rik	3	19894886	19898984	+	4099	lincRNA	RIKEN cDNA 4632415L05 gene [Source:MGI Symbol;Acc:MGI:1918058]	-	1233	1428	1241	1696	1658	1783	1826	32.4649	31.7819	31.0693	36.4454	35.0602	41.3603	39.8242
ENSMUSG00000037443	840.207	862.04	740.009	851.339	1157.98	1021.7	997.882	-0.349941	0.00042138	0.00471658	Cep85	4	134129858	134187112	-	5269	protein_coding	centrosomal protein 85 [Source:MGI Symbol;Acc:MGI:1917262]	-	729	934	747	949	1211	974	986	36.7386	39.7871	35.7951	39.0326	49.0138	43.245	41.1592
ENSMUSG00000032352	909.36	948.798	779.635	813.661	1106.34	1175.9	1048.48	-0.349856	0.000523386	0.00564111	Lrrc1	9	77430823	77544870	-	8195	protein_coding	leucine rich repeat containing 1 [Source:MGI Symbol;Acc:MGI:2442313]	-	789	1028	787	907	1157	1121	1036	28.963	31.8977	27.4694	27.1731	34.1098	36.2538	31.5008
ENSMUSG00000025241	5451.55	5288.53	5223.65	5778.16	6283.29	7349.11	7283.73	-0.349597	3.08927e-05	0.00052176	Fyco1	9	123789500	123851899	-	8862	protein_coding	FYVE and coiled-coil domain containing 1 [Source:MGI Symbol;Acc:MGI:107277]	-	4730	5730	5273	6441	6571	7006	7197	79.1057	81.0032	83.8518	87.9157	88.2586	103.228	99.6996
ENSMUSG00000026565	1461.43	1129.7	1143.2	1271.18	1460.14	1569.26	1812.58	-0.349276	0.00229254	0.0181599	Pou2f1	1	165865154	166002678	-	16597	protein_coding	POU domain, class 2, transcription factor 1 [Source:MGI Symbol;Acc:MGI:101898]	Pou	1268	1224	1154	1417	1527	1496	1791	28.7059	23.4225	24.8408	26.1811	27.7632	29.8377	33.5848
ENSMUSG00000036552	243.187	244.583	264.501	226.067	321.289	348.259	280.338	-0.348851	0.00658559	0.0408815	Ermard	17	15041208	15090044	+	7247	protein_coding	ER membrane associated RNA degradation [Source:MGI Symbol;Acc:MGI:1917317]	-	211	265	267	252	336	332	277	15.6772	16.643	18.8628	15.281	20.0495	21.7323	17.0475
ENSMUSG00000022797	2980.49	2831.63	2576.66	2627.58	3778.01	3597.98	3223.38	-0.34884	0.000101329	0.00141994	Tfrc	16	32608920	32632794	+	6185	protein_coding	transferrin receptor [Source:MGI Symbol;Acc:MGI:98822]	-	2586	3068	2601	2929	3951	3430	3185	98.2162	98.4941	93.9296	90.7904	120.515	114.77	100.198
ENSMUSG00000036270	1769.16	1742.54	1775.23	1728.69	2220.33	2378.02	2136.44	-0.348479	4.35647e-06	9.43605e-05	Edc4	8	105880881	105894908	+	5497	protein_coding	enhancer of mRNA decapping 4 [Source:MGI Symbol;Acc:MGI:2446249]	-	1535	1888	1792	1927	2322	2267	2111	41.5098	43.1563	46.0774	42.5295	50.4293	54.0101	47.2852
ENSMUSG00000044876	2445.7	2323.08	2058.55	2471.48	2914.55	2801.81	3234.51	-0.348208	0.000198727	0.0025238	Zfp444	7	6172226	6193811	+	5959	protein_coding	zinc finger protein 444 [Source:MGI Symbol;Acc:MGI:1923365]	zf-C2H2	2122	2517	2078	2755	3048	2671	3196	124.471	124.798	115.898	131.89	143.588	138.032	155.284
ENSMUSG00000035762	379.188	424.56	390.313	399.205	513.488	539.172	485.784	-0.348168	0.000868207	0.00848019	Tmem161b	13	84222296	84296141	+	6262	protein_coding	transmembrane protein 161B [Source:MGI Symbol;Acc:MGI:1919995]	-	329	460	394	445	537	514	480	12.6652	14.9684	14.4218	13.9811	16.6024	17.4326	15.3057
ENSMUSG00000011752	5172.63	5783.24	5107.75	5597.84	7176.4	6689.3	6926.47	-0.347949	6.14948e-06	0.000128115	Pgam1	19	41911871	41918664	+	1831	protein_coding	phosphoglycerate mutase 1 [Source:MGI Symbol;Acc:MGI:97552]	-	4488	6266	5156	6240	7505	6377	6844	166.637	196.657	182.029	189.091	223.794	208.601	210.486
ENSMUSG00000040586	628.138	531.622	559.712	513.136	696.125	678.686	777.255	-0.347774	0.00125986	0.0114899	Ofd1	X	166390033	166440704	-	4453	protein_coding	OFD1, centriole and centriolar satellite protein [Source:MGI Symbol;Acc:MGI:1350328]	-	545	576	565	572	728	647	768	8.32053	7.43323	8.20184	7.12716	8.92617	8.70242	9.71205
ENSMUSG00000020189	2477.98	2260.32	1906.98	2145.84	2640.11	2922.44	2902.56	-0.347297	0.00048136	0.00527011	Osbpl8	10	111164752	111297249	+	9401	protein_coding	oxysterol binding protein-like 8 [Source:MGI Symbol;Acc:MGI:2443807]	-	2150	2449	1925	2392	2761	2786	2868	42.0379	40.4755	35.7883	38.1707	43.3559	47.9916	46.449
ENSMUSG00000032285	364.205	427.328	394.275	424.324	523.05	516.095	515.134	-0.346661	0.00105268	0.00994254	Dnaja4	9	54698873	54716315	+	3589	protein_coding	DnaJ heat shock protein family (Hsp40) member A4 [Source:MGI Symbol;Acc:MGI:1927638]	-	316	463	398	473	547	492	509	11.5376	14.2892	13.8172	14.0947	16.0396	15.8261	15.3936
ENSMUSG00000037432	257.018	231.662	227.847	226.964	280.171	291.615	342.073	-0.346639	0.00701514	0.0427816	Fer1l5	1	36372291	36422110	+	6356	protein_coding	fer-1-like 5 (C. elegans) [Source:MGI Symbol;Acc:MGI:3616091]	-	223	251	230	253	293	278	338	4.80979	4.5761	4.7169	4.45356	5.07537	5.28259	6.03855
ENSMUSG00000023022	1559.4	1654.86	1326.47	1695.5	1862.71	2041.3	2104.05	-0.346558	0.000693975	0.00712194	Lima1	15	99778470	99875456	-	7608	protein_coding	LIM domain and actin binding 1 [Source:MGI Symbol;Acc:MGI:1920992]	-	1353	1793	1339	1890	1948	1946	2079	44.5436	49.8963	41.9156	50.7826	51.5057	56.4432	56.694
ENSMUSG00000048799	2503.33	2265.86	2122.94	2231.96	2855.26	2980.13	2907.62	-0.345069	2.46603e-05	0.000429376	Cep120	18	53681724	53744547	-	4553	protein_coding	centrosomal protein 120 [Source:MGI Symbol;Acc:MGI:2147298]	-	2172	2455	2143	2488	2986	2841	2873	32.4317	30.9857	30.4256	30.3198	35.8079	37.3734	35.5337
ENSMUSG00000020696	505.968	455.017	408.144	367.807	570.861	575.886	529.302	-0.344458	0.0049836	0.0331278	Rffl	11	82802449	82871210	-	5922	protein_coding	ring finger and FYVE like domain containing protein [Source:MGI Symbol;Acc:MGI:1914588]	-	439	493	412	410	597	549	523	10.8134	10.2647	9.64947	8.2423	11.81	11.9138	10.6708
ENSMUSG00000020528	934.716	1140.77	946.062	933.871	1425.72	1193.73	1190.17	-0.344188	0.00168183	0.0143001	Prpsap2	11	61729650	61762088	-	1962	protein_coding	phosphoribosyl pyrophosphate synthetase-associated protein 2 [Source:MGI Symbol;Acc:MGI:2384838]	-	811	1236	955	1041	1491	1138	1176	37.8675	48.7826	42.3992	39.6701	55.9117	46.8133	45.4829
ENSMUSG00000040220	471.392	490.089	522.068	503.268	649.271	718.547	548.531	-0.344134	0.00255781	0.019817	Gas8	8	123518834	123536650	+	4012	protein_coding	growth arrest specific 8 [Source:MGI Symbol;Acc:MGI:1202386]	-	409	531	527	561	679	685	542	13.1842	14.4686	16.1529	14.7591	17.5784	19.4537	14.4719
ENSMUSG00000017376	3687	3502.62	2995.7	3095.86	4267.59	4226.31	4242.52	-0.343976	0.000146904	0.00194883	Nlk	11	78567168	78697373	-	5447	protein_coding	nemo like kinase [Source:MGI Symbol;Acc:MGI:1201387]	-	3199	3795	3024	3451	4463	4029	4192	115.13	115.448	103.482	101.365	128.997	127.748	124.966
ENSMUSG00000000355	409.154	455.94	471.545	427.912	550.78	586.376	560.676	-0.343971	0.000795865	0.00793268	Mcts1	X	38600578	38613426	+	1571	protein_coding	malignant T cell amplified sequence 1 [Source:MGI Symbol;Acc:MGI:1916245]	-	355	494	476	477	576	559	554	41.468	48.7766	52.8688	45.4746	54.0363	57.5277	53.603
ENSMUSG00000058392	2159.87	2348	2150.68	2100.99	2455.56	3134.33	2821.6	-0.343523	0.000411594	0.00463584	Rrp1b	17	32036100	32062865	+	7702	protein_coding	ribosomal RNA processing 1 homolog B (S. cerevisiae) [Source:MGI Symbol;Acc:MGI:1919712]	-	1874	2544	2171	2342	2568	2988	2788	91.197	104.647	100.457	93.0173	100.366	128.107	112.383
ENSMUSG00000042408	1058.04	910.034	1009.46	957.196	1035.58	1380.45	1376.39	-0.343489	0.00295716	0.022266	Zmym6	4	127077383	127124372	+	7692	protein_coding	zinc finger, MYM-type 6 [Source:MGI Symbol;Acc:MGI:106505]	-	918	986	1019	1067	1083	1316	1360	25.0238	22.719	26.4115	23.7379	23.7093	31.6044	30.7075
ENSMUSG00000030533	1513.29	1436.12	1380.95	1437.14	1833.07	1778.01	1905.69	-0.343433	1.01843e-05	0.000197646	Unc45a	7	80325292	80341005	-	5054	protein_coding	unc-45 myosin chaperone A [Source:MGI Symbol;Acc:MGI:2142246]	-	1313	1556	1394	1602	1917	1695	1883	58.7257	58.8266	59.2836	58.478	68.8597	66.7905	69.7604
ENSMUSG00000021906	258.171	307.344	292.239	277.201	405.436	365.043	326.892	-0.343347	0.00609053	0.0385385	Oxnad1	14	32085374	32103202	+	5959	protein_coding	oxidoreductase NAD-binding domain containing 1 [Source:MGI Symbol;Acc:MGI:1916953]	-	224	333	295	309	424	348	323	13.971	17.556	17.4949	15.7292	21.2386	19.1224	16.687
ENSMUSG00000029655	1213.63	1047.55	1097.63	1131.23	1309.06	1519.96	1476.58	-0.343206	0.000242695	0.00295914	N4bp2l2	5	150608007	150666183	-	17470	protein_coding	NEDD4 binding protein 2-like 2 [Source:MGI Symbol;Acc:MGI:2687207]	-	1053	1135	1108	1261	1369	1449	1459	24.136	21.9904	24.1482	23.5894	25.2011	29.2608	27.7004
ENSMUSG00000013593	2695.81	3329.1	3015.51	2814.17	4294.37	3751.13	3350.9	-0.342716	0.00123728	0.0113252	Ndufs2	1	171234853	171251388	-	2313	protein_coding	NADH:ubiquinone oxidoreductase core subunit S2 [Source:MGI Symbol;Acc:MGI:2385112]	-	2339	3607	3044	3137	4491	3576	3311	153.638	200.269	190.116	168.17	236.913	206.941	180.145
ENSMUSG00000111063	365.357	377.489	319.977	364.219	415.954	460.499	498.941	-0.342405	0.00327156	0.0240419	Zkscan7	9	122903246	122914154	+	5650	transcribed_unprocessed_pseudogene	zinc finger with KRAB and SCAN domains 7 [Source:MGI Symbol;Acc:MGI:3040678]	-	317	409	323	406	435	439	493	6.49125	7.07935	6.28897	6.78518	7.15381	7.91981	8.36202
ENSMUSG00000018199	3130.32	2562.12	2626.19	2924.51	3112.48	3743.78	3948.01	-0.342331	0.00128841	0.0116676	Trove2	1	143750790	143777068	-	9541	protein_coding	TROVE domain family, member 2 [Source:MGI Symbol;Acc:MGI:106652]	-	2716	2776	2651	3260	3255	3569	3901	28.2504	24.4071	26.2188	27.6745	27.191	32.7057	33.6098
ENSMUSG00000051238	459.866	562.08	504.236	466.487	714.293	568.543	637.592	-0.342269	0.00367343	0.0261552	Swsap1	9	21955755	21958264	+	1838	protein_coding	SWIM type zinc finger 7 associated protein 1 [Source:MGI Symbol;Acc:MGI:1914212]	-	399	609	509	520	747	542	630	14.7582	19.0406	17.9014	15.6975	22.1902	17.6621	19.3018
ENSMUSG00000032640	998.106	886.037	867.802	953.607	1023.15	1080.44	1474.56	-0.342245	0.00666302	0.0411966	Chsy1	7	66109515	66173798	+	4176	protein_coding	chondroitin sulfate synthase 1 [Source:MGI Symbol;Acc:MGI:2681120]	-	866	960	876	1063	1070	1030	1457	14.0982	13.2105	13.56	14.1236	13.9897	14.7729	19.6472
ENSMUSG00000031546	215.526	211.357	213.978	197.36	277.303	252.802	278.314	-0.342207	0.00628368	0.0394283	Gins4	8	23226616	23237659	-	1349	protein_coding	GINS complex subunit 4 (Sld5 homolog) [Source:MGI Symbol;Acc:MGI:1923847]	-	187	229	216	220	290	241	275	9.42404	9.75509	10.3504	9.04866	11.7374	10.7002	11.4795
ENSMUSG00000021094	382.646	477.168	489.377	433.295	671.264	528.682	523.23	-0.342125	0.00780021	0.0459876	Dhrs7	12	72650353	72664909	-	3541	protein_coding	dehydrogenase/reductase (SDR family) member 7 [Source:MGI Symbol;Acc:MGI:1913625]	-	332	517	494	483	702	504	517	14.9475	19.6753	21.1478	17.7478	25.3832	19.9914	19.2804
ENSMUSG00000026670	945.088	1013.41	924.268	917.724	1262.2	1254.57	1122.36	-0.341778	0.000135856	0.00182163	Uap1	1	170141938	170174957	-	4011	protein_coding	UDP-N-acetylglucosamine pyrophosphorylase 1 [Source:MGI Symbol;Acc:MGI:1334459]	-	820	1098	933	1023	1320	1196	1109	43.7574	49.5269	47.3399	44.5533	56.5706	56.2277	49.019
ENSMUSG00000021275	1464.89	1264.45	1271.98	1436.24	1691.55	1658.43	1857.11	-0.34151	0.00023553	0.0028903	Tecpr2	12	110889264	110972394	+	9553	protein_coding	tectonin beta-propeller repeat containing 2 [Source:MGI Symbol;Acc:MGI:2144865]	-	1271	1370	1284	1601	1769	1581	1835	15.7938	14.39	15.171	16.2367	17.6542	17.3083	18.8874
ENSMUSG00000004934	650.036	663.605	602.31	553.505	746.805	831.836	790.411	-0.341494	0.000846542	0.00830912	Pias4	10	81153266	81167923	-	3695	protein_coding	protein inhibitor of activated STAT 4 [Source:MGI Symbol;Acc:MGI:2136940]	zf-MIZ	564	719	608	617	781	793	781	34.6682	37.3578	35.5356	30.9531	38.5551	42.9444	39.7648
ENSMUSG00000031451	3123.4	3510.92	3101.7	3734.59	4455.01	4356.38	4081.6	-0.340646	0.000167657	0.0021878	Gas6	8	13465374	13494490	-	2548	protein_coding	growth arrest specific 6 [Source:MGI Symbol;Acc:MGI:95660]	-	2710	3804	3131	4163	4659	4153	4033	72.3065	85.7924	79.4326	90.6526	99.8343	97.6228	89.1315
ENSMUSG00000024982	737.63	806.663	708.308	731.129	884.5	996.524	977.641	-0.340637	0.000323913	0.00379534	Zdhhc6	19	55271291	55316032	-	8284	protein_coding	zinc finger, DHHC domain containing 6 [Source:MGI Symbol;Acc:MGI:1914230]	-	640	874	715	815	925	950	966	22.5556	26.0368	23.9601	23.4422	26.1816	29.4971	28.1999
ENSMUSG00000059772	689.223	714.368	636.982	655.773	808.002	864.354	908.821	-0.340055	0.000326514	0.00382333	Slx1b	7	126689468	126695784	-	3521	protein_coding	SLX1 structure-specific endonuclease subunit homolog B (S. cerevisiae) [Source:MGI Symbol;Acc:MGI:1915220]	-	598	774	643	731	845	824	898	19.9092	21.7818	20.355	19.8626	22.5937	24.1691	24.7641
ENSMUSG00000016319	2275.13	3147.28	2680.67	2472.38	3839.21	3177.34	3157.6	-0.34002	0.0037562	0.0266393	Slc25a5	X	36795651	36798807	+	1646	protein_coding	solute carrier family 25 (mitochondrial carrier, adenine nucleotide translocator), member 5 [Source:MGI Symbol;Acc:MGI:1353496]	-	1974	3410	2706	2756	4015	3029	3120	134.47	196.35	175.272	153.222	219.655	181.785	176.046
ENSMUSG00000025646	765.291	642.377	686.514	690.76	799.396	982.888	888.58	-0.339975	0.0013899	0.0123693	Atrip	9	109057933	109074124	-	7152	protein_coding	ATR interacting protein [Source:MGI Symbol;Acc:MGI:1925349]	-	664	696	693	770	836	937	878	21.537	19.0821	21.3726	20.3832	21.7772	26.7755	23.5888
ENSMUSG00000029366	373.425	430.097	405.172	475.458	586.16	495.115	540.435	-0.339867	0.00391101	0.0273816	Dck	5	88764996	88783281	+	3781	protein_coding	deoxycytidine kinase [Source:MGI Symbol;Acc:MGI:102726]	-	324	466	409	530	613	472	534	11.3074	13.7469	13.5722	15.0959	17.1814	14.5125	15.4367
ENSMUSG00000009828	1345.02	1205.38	1101.59	1237.98	1566.28	1553.53	1553.5	-0.339683	0.000157509	0.00207187	Ick	9	78109192	78172107	+	11524	protein_coding	intestinal cell kinase [Source:MGI Symbol;Acc:MGI:1934157]	-	1167	1306	1112	1380	1638	1481	1535	30.5144	28.8654	27.6469	29.4496	34.3975	34.117	33.2458
ENSMUSG00000022960	373.425	439.327	418.051	391.131	487.67	553.858	516.146	-0.338825	0.00194761	0.0160231	Donson	16	91676808	91688770	-	3130	protein_coding	downstream neighbor of SON [Source:MGI Symbol;Acc:MGI:1890621]	-	324	476	422	436	510	528	510	14.2292	17.6703	17.6221	15.6275	17.9881	20.4292	18.5525
ENSMUSG00000039662	12793.3	12715.6	12302.8	13086.8	15933.4	16250.7	16255.6	-0.338801	3.39205e-08	1.19391e-06	Icmt	4	152297227	152307121	+	5287	protein_coding	isoprenylcysteine carboxyl methyltransferase [Source:MGI Symbol;Acc:MGI:1888594]	-	11100	13777	12419	14588	16663	15492	16062	272.133	285.504	289.502	291.89	328.087	334.616	326.176
ENSMUSG00000099881	781.427	930.339	874.736	801.102	1133.12	1196.88	922.99	-0.338604	0.00271422	0.0208228	2810013P06Rik	8	123042466	123044602	+	2137	bidirectional_promoter_lncRNA	RIKEN cDNA 2810013P06 gene [Source:MGI Symbol;Acc:MGI:1914456]	-	678	1008	883	893	1185	1141	912	21.5691	27.1059	26.7099	23.1857	30.2761	31.9794	24.0322
ENSMUSG00000032119	809.088	744.825	739.018	809.176	884.5	952.468	1136.53	-0.338409	0.00163398	0.0139785	Hinfp	9	44292440	44305671	-	8303	protein_coding	histone H4 transcription factor [Source:MGI Symbol;Acc:MGI:2429620]	zf-C2H2	702	807	746	902	925	908	1123	31.0103	30.133	31.334	32.5193	32.8163	35.3375	41.0907
ENSMUSG00000024993	1260.89	1366.9	1273.96	1152.76	1668.6	1706.68	1457.35	-0.338226	0.000413423	0.00465353	Fam45a	19	60811585	60836227	+	6242	protein_coding	family with sequence similarity 45, member A [Source:MGI Symbol;Acc:MGI:1915144]	-	1094	1481	1286	1285	1745	1627	1440	48.1078	55.0495	53.7708	46.1176	61.6272	63.0328	52.4512
ENSMUSG00000028527	764.139	884.191	810.344	898.885	975.34	1202.12	1042.41	-0.338145	0.00138541	0.0123448	Ak4	4	101419277	101466995	+	4646	protein_coding	adenylate kinase 4 [Source:MGI Symbol;Acc:MGI:87979]	-	663	958	818	1002	1020	1146	1030	21.0821	25.7493	24.7321	26.0036	26.0483	32.1045	27.1289
ENSMUSG00000026281	493.29	548.236	556.74	504.165	682.738	725.889	606.218	-0.337837	0.00143723	0.0126838	Dtymk	1	93792576	93801934	-	2631	protein_coding	deoxythymidylate kinase [Source:MGI Symbol;Acc:MGI:108396]	-	428	594	562	562	714	692	599	30.856	36.1978	38.5248	33.0673	41.3402	43.9524	35.7699
ENSMUSG00000036291	758.376	787.281	737.037	698.833	961.953	927.292	954.364	-0.336965	0.000140055	0.00187096	Ap5m1	14	49066097	49094234	+	11392	protein_coding	adaptor-related protein complex 5, mu 1 subunit [Source:MGI Symbol;Acc:MGI:1921635]	-	658	853	744	779	1006	884	943	17.44	19.1104	18.75	16.8509	21.414	20.6421	20.7027
ENSMUSG00000017843	5021.65	4448.65	4110.17	4499.81	5639.76	5822.85	5769.7	-0.336872	5.86351e-05	0.000894719	Ppp2r5c	12	110447120	110583062	+	8286	protein_coding	protein phosphatase 2, regulatory subunit B', gamma [Source:MGI Symbol;Acc:MGI:1349475]	-	4357	4820	4149	5016	5898	5551	5701	130.891	122.397	118.515	122.983	142.301	146.918	141.863
ENSMUSG00000022836	1803.74	1655.78	1552.33	1676.66	1760.39	1998.29	2675.86	-0.336872	0.00784208	0.0461234	Mylk	16	34745210	35002420	+	11263	protein_coding	myosin, light polypeptide kinase [Source:MGI Symbol;Acc:MGI:894806]	-	1565	1794	1567	1869	1841	1905	2644	45.3904	43.9818	43.2142	44.241	42.8827	48.6772	63.5194
ENSMUSG00000031730	289.289	327.649	303.136	296.937	413.085	393.365	361.302	-0.336775	0.00338435	0.0245925	Dhodh	8	109591343	109608673	-	6326	protein_coding	dihydroorotate dehydrogenase [Source:MGI Symbol;Acc:MGI:1928378]	-	251	355	306	331	432	375	357	13.106	15.6684	15.1924	14.1056	18.1159	17.2508	15.4404
ENSMUSG00000046351	681.155	722.674	668.683	664.744	823.302	895.823	893.641	-0.336693	0.000204985	0.00259048	Zfp322a	13	23353103	23369208	-	6263	protein_coding	zinc finger protein 322A [Source:MGI Symbol;Acc:MGI:2442566]	zf-C2H2	591	783	675	741	861	854	883	25.772	28.8618	27.9881	26.3722	30.1539	32.8096	31.8946
ENSMUSG00000021258	621.223	561.157	534.946	567.858	719.074	734.281	726.652	-0.336177	0.00043248	0.00481689	Ccnk	12	108179579	108203359	+	3042	protein_coding	cyclin K [Source:MGI Symbol;Acc:MGI:1276106]	-	539	608	540	633	752	700	718	19.0059	18.1219	18.1051	18.2167	21.296	21.746	20.971
ENSMUSG00000034189	1326.58	1245.07	1116.45	1268.49	1366.43	1547.24	1833.84	-0.336116	0.0025792	0.0199684	Hsdl1	8	119561989	119575183	-	3235	protein_coding	hydroxysteroid dehydrogenase like 1 [Source:MGI Symbol;Acc:MGI:1919802]	-	1151	1349	1127	1414	1429	1475	1812	51.5479	51.0679	47.9918	51.6834	51.3981	58.1981	67.2185
ENSMUSG00000030243	530.172	510.394	493.339	535.563	591.898	662.951	724.628	-0.33576	0.00143602	0.0126838	Recql	6	142350342	142387087	-	7688	protein_coding	RecQ protein-like [Source:MGI Symbol;Acc:MGI:103021]	-	460	553	498	597	619	632	716	22.274	22.6342	22.9286	23.5929	24.0719	26.9612	28.7176
ENSMUSG00000005125	2377.7	2387.69	2114.03	2472.38	3143.08	2857.4	2907.62	-0.335655	7.50792e-05	0.00110269	Ndrg1	15	66929318	66969640	-	6596	protein_coding	N-myc downstream regulated gene 1 [Source:MGI Symbol;Acc:MGI:1341799]	-	2063	2587	2134	2756	3287	2724	2873	137.232	145.463	134.977	149.624	175.604	159.641	158.302
ENSMUSG00000046556	935.868	791.896	754.869	877.354	1004.03	1041.63	1165.88	-0.335621	0.0014821	0.0130097	Zfp319	8	95323011	95331950	-	7232	protein_coding	zinc finger protein 319 [Source:MGI Symbol;Acc:MGI:1890618]	zf-C2H2	812	858	762	978	1050	993	1152	7.63317	6.81768	6.81102	7.50333	7.92715	8.22393	8.97008
ENSMUSG00000032235	541.697	491.012	492.349	507.753	596.679	653.51	691.23	-0.335595	0.000947402	0.00912026	Ice2	9	69397906	69433122	+	7736	protein_coding	interactor of little elongation complex ELL subunit 2 [Source:MGI Symbol;Acc:MGI:2135947]	-	470	532	497	566	624	623	683	21.7957	20.8538	21.9148	21.4218	23.24	25.4532	26.2355
ENSMUSG00000023272	281.221	318.42	338.799	285.275	407.348	367.141	398.748	-0.334578	0.00498078	0.0331213	Creld2	15	88819646	88826683	+	1366	protein_coding	cysteine-rich with EGF-like domains 2 [Source:MGI Symbol;Acc:MGI:1923987]	-	244	345	342	318	426	350	394	12.1436	14.5136	16.1842	12.9167	17.0273	15.3464	16.2423
ENSMUSG00000040111	10001.8	8730.24	7769.6	9583.62	10272.6	11721.2	12472.5	-0.334509	0.00130183	0.0117631	Gramd1b	9	40293233	40531383	-	10075	protein_coding	GRAM domain containing 1B [Source:MGI Symbol;Acc:MGI:1925037]	-	8678	9459	7843	10683	10743	11174	12324	201.905	186.026	173.507	202.855	200.739	229.043	237.506
ENSMUSG00000002346	526.714	598.998	519.096	539.151	702.819	725.889	655.809	-0.333688	0.000892123	0.00868555	Slc25a42	8	70184340	70212305	-	5996	protein_coding	solute carrier family 25, member 42 [Source:MGI Symbol;Acc:MGI:1920345]	-	457	649	524	601	735	692	648	11.3555	13.6313	12.3803	12.188	14.6676	15.1488	13.3371
ENSMUSG00000020691	232.814	265.811	226.857	252.98	345.194	300.006	294.507	-0.333659	0.00856006	0.0492374	Mettl2	11	105126425	105140394	+	3399	protein_coding	methyltransferase like 2 [Source:MGI Symbol;Acc:MGI:1289171]	-	202	288	229	282	361	286	291	10.3332	12.453	11.1385	11.7733	14.8309	12.8893	12.3302
ENSMUSG00000031467	1749.57	1671.47	1618.71	1665	2258.58	2129.42	1983.62	-0.333555	3.87246e-05	0.000628699	Agpat5	8	18846277	18891361	+	10783	protein_coding	1-acylglycerol-3-phosphate O-acyltransferase 5 (lysophosphatidic acid acyltransferase, epsilon) [Source:MGI Symbol;Acc:MGI:1196345]	-	1518	1811	1634	1856	2362	2030	1960	15.1542	15.282	15.5103	15.1218	18.9373	17.8541	16.2073
ENSMUSG00000022257	5264.83	5675.25	4687.71	5125.08	7125.72	6628.46	6006.52	-0.333342	0.000303514	0.00358194	Laptm4b	15	34238028	34284302	+	1938	protein_coding	lysosomal-associated protein transmembrane 4B [Source:MGI Symbol;Acc:MGI:1890494]	-	4568	6149	4732	5713	7452	6319	5935	265.883	302.531	261.889	271.391	348.35	324.037	286.141
ENSMUSG00000034163	2595.54	2965.46	2935.27	2534.28	3280.78	3944.14	3293.21	-0.33327	0.000788832	0.00787565	Zfc3h1	10	115384959	115432772	+	7848	protein_coding	zinc finger, C3H1-type containing [Source:MGI Symbol;Acc:MGI:2446143]	-	2252	3213	2963	2825	3431	3760	3254	63.7652	76.9	79.7728	65.2829	78.0216	93.796	76.3181
ENSMUSG00000040414	444.883	553.773	569.619	511.342	742.98	649.314	600.146	-0.332926	0.00538139	0.0350481	Slc25a28	19	43663822	43674881	-	1514	protein_coding	solute carrier family 25, member 28 [Source:MGI Symbol;Acc:MGI:2180509]	-	386	600	575	570	777	619	593	17.3328	22.7737	24.5503	20.8892	28.0209	24.488	22.0562
ENSMUSG00000021708	3511.81	2939.61	2651.95	3160.45	3875.54	3818.26	3990.51	-0.332733	0.000770187	0.00774096	Rasgrf2	13	91880400	92131656	-	9237	protein_coding	RAS protein-specific guanine nucleotide-releasing factor 2 [Source:MGI Symbol;Acc:MGI:109137]	-	3047	3185	2677	3523	4053	3640	3943	82.3648	72.7745	68.8059	77.7227	87.9883	86.6866	88.2859
ENSMUSG00000021234	247.798	266.734	279.361	271.818	315.551	372.385	333.977	-0.33263	0.00584511	0.0374724	Fam161b	12	84345309	84361833	-	4656	protein_coding	family with sequence similarity 161, member B [Source:MGI Symbol;Acc:MGI:2443027]	-	215	289	282	303	330	355	330	5.70737	6.48479	7.11795	6.56457	7.03543	8.30247	7.25616
ENSMUSG00000023852	1498.31	1316.13	1207.59	1398.56	1576.8	1695.14	1895.57	-0.332577	0.00117296	0.0108566	Chd1	17	15704967	15772610	+	8721	protein_coding	chromodomain helicase DNA binding protein 1 [Source:MGI Symbol;Acc:MGI:88393]	-	1300	1426	1219	1559	1649	1616	1873	27.6704	25.6562	24.6709	27.0822	28.1885	30.3037	33.0221
ENSMUSG00000070639	3219.06	2526.13	2399.33	2772.91	3281.73	3357.76	3779	-0.332249	0.00223901	0.0179012	Lrrc8b	5	105415775	105490074	+	6726	protein_coding	leucine rich repeat containing 8 family, member B [Source:MGI Symbol;Acc:MGI:2141353]	-	2793	2737	2422	3091	3432	3201	3734	28.2307	23.3844	23.2773	25.4986	27.8597	28.5048	31.2622
ENSMUSG00000026383	1845.23	1505.34	1336.37	1593.23	1766.13	1982.56	2258.9	-0.332076	0.00545816	0.0354456	Epb41l5	1	119545037	119649000	-	14758	protein_coding	erythrocyte membrane protein band 4.1 like 5 [Source:MGI Symbol;Acc:MGI:103006]	-	1601	1631	1349	1776	1847	1890	2232	40.1485	34.5726	32.1661	36.3485	37.1984	41.7562	46.3625
ENSMUSG00000034292	366.51	442.096	378.425	427.912	545.043	547.564	454.411	-0.332	0.00548861	0.0356048	Traf3ip1	1	91494647	91529307	+	3712	protein_coding	TRAF3 interacting protein 1 [Source:MGI Symbol;Acc:MGI:1921269]	-	318	479	382	477	570	522	449	8.00405	10.191	9.14227	9.79867	11.5222	11.5754	9.36104
ENSMUSG00000031706	1317.36	1359.51	1285.85	1147.38	1559.59	1739.2	1561.59	-0.331889	0.000334764	0.00389212	Rfx1	8	84066834	84096992	+	6431	protein_coding	regulatory factor X, 1 (influences HLA class II expression) [Source:MGI Symbol;Acc:MGI:105982]	RFX	1143	1473	1298	1279	1631	1658	1543	24.7471	26.9576	26.7215	22.6003	28.3603	31.6259	27.6719
ENSMUSG00000022529	735.325	790.05	683.542	852.236	950.479	896.872	1074.8	-0.331621	0.00225864	0.0179862	Zfp263	16	3744093	3750790	+	4521	protein_coding	zinc finger protein 263 [Source:MGI Symbol;Acc:MGI:1921370]	zf-C2H2	638	856	690	950	994	855	1062	17.2735	19.59	17.7631	20.9918	21.6135	20.3943	23.8166
ENSMUSG00000051510	1546.72	1756.38	1543.42	1554.66	1972.67	2307.74	1818.65	-0.331433	0.00108976	0.0102284	Mafg	11	120625117	120633600	-	5613	protein_coding	v-maf musculoaponeurotic fibrosarcoma oncogene family, protein G (avian) [Source:MGI Symbol;Acc:MGI:96911]	TF_bZIP	1342	1903	1558	1733	2063	2200	1797	56.9505	68.2628	62.8666	60.0219	70.311	82.2524	63.1667
ENSMUSG00000042650	4035.07	3148.2	2930.32	3761.5	3946.3	4221.07	5112.88	-0.331184	0.00734538	0.0442713	Alkbh5	11	60536381	60558512	+	5987	protein_coding	alkB homolog 5, RNA demethylase [Source:MGI Symbol;Acc:MGI:2144489]	-	3501	3411	2958	4193	4127	4024	5052	74.9173	61.6982	60.1861	73.2287	70.9257	75.8629	89.5465
ENSMUSG00000035266	480.612	492.858	511.171	510.444	590.941	696.518	614.315	-0.331094	0.00121124	0.0111423	Helq	5	100762145	100798598	-	5069	protein_coding	helicase, POLQ-like [Source:MGI Symbol;Acc:MGI:2176740]	-	417	534	516	569	618	664	607	21.6738	23.4607	25.501	24.1367	25.7969	30.4053	26.1326
ENSMUSG00000055991	463.324	404.254	360.593	391.131	497.232	473.087	576.869	-0.330815	0.00672762	0.0415058	Zkscan5	5	145204562	145221750	+	4114	protein_coding	zinc finger with KRAB and SCAN domains 5 [Source:MGI Symbol;Acc:MGI:107533]	zf-C2H2	402	438	364	436	520	451	570	16.5134	15.2084	14.2174	14.6171	17.155	16.3218	19.3945
ENSMUSG00000053062	2483.74	2480.9	2121.95	2360.25	2922.2	3097.62	2944.05	-0.330425	8.33104e-05	0.00119915	Jam2	16	84774123	84825928	+	6045	protein_coding	junction adhesion molecule 2 [Source:MGI Symbol;Acc:MGI:1933820]	-	2155	2688	2142	2631	3056	2953	2909	71.1193	74.9842	67.2152	70.8642	80.9977	85.8588	79.5205
ENSMUSG00000047371	366.51	403.332	375.453	437.78	524.962	470.989	515.134	-0.33014	0.0029704	0.0223226	Zfp768	7	127342795	127345589	-	2522	protein_coding	zinc finger protein 768 [Source:MGI Symbol;Acc:MGI:2384582]	zf-C2H2	318	437	379	488	549	449	509	8.88207	10.3174	10.0655	11.1243	12.3151	11.0488	11.776
ENSMUSG00000059920	464.476	507.625	506.218	480.841	550.78	644.069	673.014	-0.329767	0.00218657	0.017552	4930453N24Rik	16	64751751	64771161	-	5948	protein_coding	RIKEN cDNA 4930453N24 gene [Source:MGI Symbol;Acc:MGI:1914859]	-	403	550	511	536	576	614	665	8.39387	9.68323	10.1201	9.11146	9.63515	11.267	11.4729
ENSMUSG00000022474	1855.6	2061.88	1771.27	1844.42	2621.94	2322.43	2208.29	-0.329217	0.000393223	0.0044652	Pmm1	15	81951108	81960930	-	2866	protein_coding	phosphomannomutase 1 [Source:MGI Symbol;Acc:MGI:1353418]	-	1610	2234	1788	2056	2742	2214	2182	129.839	152.287	137.106	135.322	177.593	157.304	145.757
ENSMUSG00000028842	2270.52	1983.43	1829.71	2123.41	2164.87	2664.39	3000.73	-0.329073	0.00481506	0.0322609	Ago3	4	126331704	126429556	-	16571	protein_coding	argonaute RISC catalytic subunit 3 [Source:MGI Symbol;Acc:MGI:2446634]	-	1970	2149	1847	2367	2264	2540	2965	43.1194	39.7597	38.4398	42.2834	39.798	48.9802	53.7558
ENSMUSG00000042396	1177.9	1121.39	1017.39	1058.57	1472.57	1361.57	1313.64	-0.328342	0.000295946	0.00350871	Rbm7	9	48488701	48495299	-	4941	protein_coding	RNA binding motif protein 7 [Source:MGI Symbol;Acc:MGI:1914260]	-	1022	1215	1027	1180	1540	1298	1298	30.9763	31.1283	29.5976	29.1895	37.4868	34.6604	32.5873
ENSMUSG00000021893	1361.16	1329.98	1295.76	1328.59	1570.11	1668.92	1795.38	-0.328154	6.58942e-05	0.000987919	Capn7	14	31336638	31371986	+	4895	protein_coding	calpain 7 [Source:MGI Symbol;Acc:MGI:1338030]	-	1181	1441	1308	1481	1642	1591	1774	23.7261	24.4704	24.9858	24.2828	26.4929	28.1597	29.5206
ENSMUSG00000036061	1879.8	2361.84	2322.06	2059.72	2549.27	3036.78	2614.13	-0.327571	0.00181562	0.0151549	Smug1	15	103153290	103167092	-	6141	protein_coding	single-strand selective monofunctional uracil DNA glycosylase [Source:MGI Symbol;Acc:MGI:1918976]	-	1631	2559	2344	2296	2666	2895	2583	42.2247	55.9994	57.7003	48.5122	55.4309	66.0302	55.3901
ENSMUSG00000020107	889.766	1171.23	1042.15	1046.9	1418.07	1426.6	1114.27	-0.327315	0.00596017	0.0379668	Anapc16	10	59987409	60003135	-	4890	protein_coding	anaphase promoting complex subunit 16 [Source:MGI Symbol;Acc:MGI:1289325]	-	772	1269	1052	1167	1483	1360	1101	48.8221	67.8361	63.259	60.2332	75.3215	75.7738	57.6742
ENSMUSG00000024236	994.648	921.11	823.223	897.988	1097.74	1122.4	1228.63	-0.327108	0.000696081	0.00713137	Svil	18	4920540	5119299	+	10701	protein_coding	supervillin [Source:MGI Symbol;Acc:MGI:2147319]	-	863	998	831	1001	1148	1070	1214	14.387	14.0634	13.1725	13.6195	15.3703	15.7154	16.7639
ENSMUSG00000028456	9994.89	9567.36	8573.01	9256.18	9941.78	12346.4	13226.5	-0.326814	0.00163435	0.0139785	Unc13b	4	43058953	43264871	+	22746	protein_coding	unc-13 homolog B [Source:MGI Symbol;Acc:MGI:1342278]	-	8672	10366	8654	10318	10397	11770	13069	165.374	167.094	156.918	160.587	159.234	197.745	206.436
ENSMUSG00000041258	2443.4	2189.25	2176.44	2302.83	2766.33	2965.45	2882.32	-0.326631	3.0236e-05	0.000511626	Zfp236	18	82593593	82692883	-	10476	protein_coding	zinc finger protein 236 [Source:MGI Symbol;Acc:MGI:1926950]	zf-C2H2	2120	2372	2197	2567	2893	2827	2848	38.3417	36.2619	37.781	37.8902	42.0206	45.0445	42.6648
ENSMUSG00000068134	351.527	298.115	344.743	349.865	372.924	454.205	454.411	-0.326069	0.00778694	0.0459792	Zfp120	2	150114406	150136708	-	4376	protein_coding	zinc finger protein 120 [Source:MGI Symbol;Acc:MGI:1345179]	zf-C2H2	305	323	348	390	390	433	449	7.34508	6.57506	7.96863	7.66527	7.54293	9.18683	8.95649
ENSMUSG00000034171	817.156	910.957	804.401	859.413	1081.48	1064.71	1065.69	-0.326062	0.000186731	0.00238997	Faah	4	115967145	116017926	-	7834	protein_coding	fatty acid amide hydrolase [Source:MGI Symbol;Acc:MGI:109609]	-	709	987	812	958	1131	1015	1053	20.581	24.218	22.4122	22.6961	26.3671	25.9578	25.3188
ENSMUSG00000040250	931.258	814.97	824.213	788.543	1135.03	1063.66	982.701	-0.32577	0.000915205	0.00887193	Ints13	6	146549632	146577835	-	8485	protein_coding	integrator complex subunit 13 [Source:MGI Symbol;Acc:MGI:1918427]	-	808	883	832	879	1187	1014	971	38.6295	35.6836	37.8215	34.2975	45.5761	42.7097	38.4523
ENSMUSG00000020628	843.664	901.727	824.213	977.829	1114.95	1146.53	1100.1	-0.325448	0.000454643	0.00502337	Trappc12	12	28690628	28750472	-	10020	protein_coding	trafficking protein particle complex 12 [Source:MGI Symbol;Acc:MGI:2445089]	-	732	977	832	1090	1166	1093	1087	17.0309	19.2142	18.406	20.6976	21.7874	22.4042	20.9484
ENSMUSG00000018372	290.442	335.956	323.94	326.541	371.968	456.303	389.639	-0.325067	0.0070023	0.0427468	Cep95	11	106789252	106819930	+	4199	protein_coding	centrosomal protein 95 [Source:MGI Symbol;Acc:MGI:2443502]	-	252	364	327	364	389	435	385	14.1704	17.3015	17.4838	16.7051	17.5675	21.5502	17.9323
ENSMUSG00000021831	688.071	749.44	690.477	671.921	826.17	957.712	869.351	-0.324931	0.00074456	0.00750431	Ero1l	14	45283087	45318771	-	5285	protein_coding	ERO1-like (S. cerevisiae) [Source:MGI Symbol;Acc:MGI:1354385]	-	597	812	697	749	864	913	859	34.8083	40.0189	38.6411	35.6416	40.4577	46.8987	41.4856
ENSMUSG00000029636	4658.59	4359.12	3896.19	4368.83	5408.36	5396.97	5515.68	-0.324576	5.39174e-05	0.000829757	Wasf3	5	146384985	146473615	+	5196	protein_coding	WAS protein family, member 3 [Source:MGI Symbol;Acc:MGI:2658986]	-	4042	4723	3933	4870	5656	5145	5450	52.8853	52.2344	48.9294	52.0036	59.4329	59.3068	59.0649
ENSMUSG00000035401	1772.62	1516.42	1384.92	1729.59	1836.89	1903.89	2346.95	-0.324469	0.00527431	0.034574	Emsy	7	98587137	98656783	-	17256	protein_coding	EMSY, BRCA2-interacting transcriptional repressor [Source:MGI Symbol;Acc:MGI:1924203]	-	1538	1643	1398	1928	1921	1815	2319	40.3082	36.3978	34.8379	41.2392	40.4337	41.9078	50.3423
ENSMUSG00000039968	1017.7	945.106	848.979	928.489	1066.18	1166.46	1312.63	-0.32433	0.00175659	0.0147992	Rsbn1l	5	20893028	20956398	-	12676	protein_coding	round spermatid basic protein 1-like [Source:MGI Symbol;Acc:MGI:3036237]	-	883	1024	857	1035	1115	1112	1297	15.1553	14.856	13.9859	14.498	15.3694	16.8147	18.439
ENSMUSG00000060798	372.273	370.105	382.387	389.337	455.159	516.095	465.543	-0.324136	0.00215298	0.0173674	Intu	3	40531286	40704774	+	7428	protein_coding	inturned planar cell polarity protein [Source:MGI Symbol;Acc:MGI:2443752]	-	323	401	386	434	476	492	460	7.53048	7.9025	8.55687	8.25802	8.91263	10.1057	8.88327
ENSMUSG00000026502	1033.83	883.268	852.942	1051.39	1171.36	1164.36	1286.32	-0.324072	0.00189025	0.015633	Desi2	1	178187417	178257301	+	9156	protein_coding	desumoylating isopeptidase 2 [Source:MGI Symbol;Acc:MGI:1926075]	-	897	957	861	1172	1225	1110	1271	18.3791	16.5746	16.7742	19.5986	20.1579	20.0371	21.5711
ENSMUSG00000037126	4923.68	5742.63	5151.33	5236.32	6497.49	6721.82	6651.2	-0.324044	2.49011e-05	0.00043315	Psd	19	46312087	46327156	-	7636	protein_coding	pleckstrin and Sec7 domain containing [Source:MGI Symbol;Acc:MGI:1920978]	-	4272	6222	5200	5837	6795	6408	6572	179.943	221.531	208.264	200.659	229.865	237.798	229.296
ENSMUSG00000021270	31190.2	25188.4	21991.2	27477.9	29632.2	32483.5	38589.5	-0.323852	0.00739197	0.0444461	Hsp90aa1	12	110690605	110702728	-	3931	protein_coding	heat shock protein 90, alpha (cytosolic), class A member 1 [Source:MGI Symbol;Acc:MGI:96250]	-	27062	27291	22199	30630	30989	30967	38130	1551.25	1322.34	1209.94	1432.97	1426.62	1563.88	1810.44
ENSMUSG00000028158	310.035	316.574	295.211	322.055	384.399	376.581	420.001	-0.323541	0.00372531	0.0264619	Mttp	3	138089854	138144968	-	6206	protein_coding	microsomal triglyceride transfer protein [Source:MGI Symbol;Acc:MGI:106926]	-	269	343	298	359	402	359	415	6.06558	6.53755	6.38917	6.60664	7.27989	7.13174	7.7511
ENSMUSG00000036026	2076.89	2205.86	2094.22	2030.12	2730	2582.57	2613.11	-0.323405	1.03042e-05	0.000199455	Tmem63b	17	45660171	45686905	-	5098	protein_coding	transmembrane protein 63b [Source:MGI Symbol;Acc:MGI:2387609]	-	1802	2390	2114	2263	2855	2462	2582	111.37	124.857	124.23	114.147	141.71	134.055	132.18
ENSMUSG00000042364	667.325	491.935	509.19	568.755	731.505	674.49	717.544	-0.323181	0.00659329	0.040887	Snx18	13	113592179	113618564	-	5220	protein_coding	sorting nexin 18 [Source:MGI Symbol;Acc:MGI:2137642]	-	579	533	514	634	765	643	709	14.2878	11.1177	12.0603	12.7685	15.1609	13.9791	14.492
ENSMUSG00000049550	2265.91	2033.27	1851.51	2188	2270.06	2783.97	2848.92	-0.323148	0.00232768	0.0183737	Clip1	5	123577795	123684618	-	12388	protein_coding	CAP-GLY domain containing linker protein 1 [Source:MGI Symbol;Acc:MGI:1928401]	-	1966	2203	1869	2439	2374	2654	2815	40.7988	38.6437	36.8791	41.3087	39.5661	48.5228	48.3879
ENSMUSG00000055371	976.207	1258.91	1119.42	1098.04	1305.23	1528.35	1388.53	-0.323041	0.00214012	0.0172791	Stam2	2	52691664	52742281	-	6007	protein_coding	signal transducing adaptor molecule (SH3 domain and ITAM motif) 2 [Source:MGI Symbol;Acc:MGI:1929100]	-	847	1364	1130	1224	1365	1457	1372	30.7107	41.8043	38.9576	36.2204	39.7482	46.5422	41.2055
ENSMUSG00000028820	5420.43	5003.34	4542.09	4928.62	5432.26	6470.07	6927.49	-0.323026	0.00123741	0.0113252	Sfpq	4	127021324	127037013	+	4743	protein_coding	splicing factor proline/glutamine rich (polypyrimidine tract binding protein associated) [Source:MGI Symbol;Acc:MGI:1918764]	-	4703	5421	4585	5494	5681	6168	6845	260.791	254.095	241.749	248.64	253	301.33	314.402
ENSMUSG00000040383	1424.55	1303.21	1241.27	1337.56	1681.98	1704.58	1619.28	-0.322932	9.3487e-05	0.0013258	Aqr	2	114101170	114187024	-	11805	protein_coding	aquarius [Source:MGI Symbol;Acc:MGI:1276102]	-	1236	1412	1253	1491	1759	1625	1600	35.0703	33.8654	33.8049	34.5274	40.0835	40.6214	37.6041
ENSMUSG00000022141	4594.05	3819.19	3216.61	3701.4	4293.41	4861.99	5413.46	-0.322887	0.00684727	0.0419852	Nipbl	15	8290617	8444463	-	9423	protein_coding	NIPBL cohesin loading factor [Source:MGI Symbol;Acc:MGI:1913976]	-	3986	4138	3247	4126	4490	4635	5349	28.7578	25.2353	22.2745	24.2948	26.0162	29.4611	31.9658
ENSMUSG00000020063	809.088	775.283	724.159	799.308	945.697	964.006	1025.21	-0.322575	0.000317564	0.00373065	Sirt1	10	63319005	63381704	-	5331	protein_coding	sirtuin 1 [Source:MGI Symbol;Acc:MGI:2135607]	-	702	840	731	891	989	919	1013	16.305	16.4917	16.144	16.89	18.4485	18.8053	19.489
ENSMUSG00000019920	580.884	551.927	537.918	517.621	677.957	742.673	648.724	-0.322512	0.00121066	0.0111423	Lims1	10	58323466	58424691	+	4891	protein_coding	LIM and senescent cell antigen-like domains 1 [Source:MGI Symbol;Acc:MGI:1195263]	-	504	598	543	577	709	708	641	21.1637	21.2257	21.6805	19.7744	23.9103	26.1924	22.2953
ENSMUSG00000026421	350.374	426.405	368.519	388.44	517.313	488.821	450.362	-0.322144	0.00474657	0.0319407	Csrp1	1	135720061	135752232	+	1956	protein_coding	cysteine and glycine-rich protein 1 [Source:MGI Symbol;Acc:MGI:88549]	-	304	462	372	433	541	466	445	11.3245	14.5475	13.1764	13.1643	16.1853	15.2937	13.7309
ENSMUSG00000047554	689.223	666.374	654.814	616.301	758.279	828.689	895.665	-0.321814	0.0011068	0.0103452	Tmem41b	7	109972187	109986929	-	5872	protein_coding	transmembrane protein 41B [Source:MGI Symbol;Acc:MGI:1289225]	-	598	722	661	687	793	790	885	25.4409	25.9638	26.7387	23.8536	27.0946	29.61	31.1867
ENSMUSG00000036676	768.749	645.146	577.544	688.965	812.783	837.08	888.58	-0.321696	0.00370219	0.0263184	Tmtc3	10	100443902	100487350	-	8939	protein_coding	transmembrane and tetratricopeptide repeat containing 3 [Source:MGI Symbol;Acc:MGI:3036255]	-	667	699	583	768	850	798	878	18.2183	16.1384	15.1412	17.1202	18.6458	19.2029	19.8642
ENSMUSG00000107741	446.036	456.863	495.321	454.825	541.218	695.469	524.242	-0.321344	0.00794522	0.0466083	Gm2011	3	40846820	40875388	+	4557	transcribed_unprocessed_pseudogene	predicted gene 2011 [Source:MGI Symbol;Acc:MGI:3780180]	-	387	495	500	507	566	663	518	20.0075	21.6315	24.5787	21.3922	23.5005	30.1979	22.1823
ENSMUSG00000042616	397.629	369.182	353.659	372.293	466.633	461.548	482.748	-0.320943	0.00210032	0.0170265	Oscp1	4	126058565	126092195	+	5254	protein_coding	organic solute carrier partner 1 [Source:MGI Symbol;Acc:MGI:1916308]	-	345	400	357	415	488	440	477	12.8237	12.5677	12.6174	12.5895	14.5677	14.4088	14.6861
ENSMUSG00000033845	266.238	311.036	331.865	303.217	414.041	378.679	359.278	-0.32073	0.00822744	0.0478434	Mrpl15	1	4773206	4785739	-	8487	protein_coding	mitochondrial ribosomal protein L15 [Source:MGI Symbol;Acc:MGI:1351639]	-	231	337	335	338	433	361	355	7.67563	9.46525	10.5841	9.1661	11.555	10.5679	9.77069
ENSMUSG00000020661	4644.76	3918.87	3567.3	4411.89	4699.8	5041.36	5915.43	-0.319862	0.00399157	0.027816	Dnmt3a	12	3806007	3914443	+	16642	protein_coding	DNA methyltransferase 3A [Source:MGI Symbol;Acc:MGI:1261827]	-	4030	4246	3601	4918	4915	4806	5845	117.941	105.036	100.205	117.466	115.521	123.915	141.689
ENSMUSG00000041817	14210.9	12566	11089.2	12461.5	15440	15593	16410.4	-0.319729	0.000435544	0.00483607	Fam169a	13	97067286	97131013	+	6082	protein_coding	family with sequence similarity 169, member A [Source:MGI Symbol;Acc:MGI:2444268]	-	12330	13615	11194	13891	16147	14865	16215	158.758	148.181	137.046	145.973	166.972	168.624	172.936
ENSMUSG00000041193	1602.04	2125.57	1715.79	1846.21	2433.57	2295.15	2163.76	-0.319595	0.0024067	0.0188981	Pla2g5	4	138799244	138863482	-	2884	protein_coding	phospholipase A2, group V [Source:MGI Symbol;Acc:MGI:101899]	-	1390	2303	1732	2058	2545	2188	2138	94.9728	133.008	112.523	114.761	139.653	131.708	121
ENSMUSG00000020277	6143.08	5904.15	5860.63	6668.97	7042.53	8277.45	7826.19	-0.319358	0.000193739	0.00246914	Pfkl	10	77986947	78010083	-	6675	protein_coding	phosphofructokinase, liver, B-type [Source:MGI Symbol;Acc:MGI:97547]	-	5330	6397	5916	7434	7365	7891	7733	298.727	303.056	315.27	340.044	331.511	389.637	358.996
ENSMUSG00000067367	1356.55	1907.75	1555.31	1543.89	2205.03	1999.34	1825.74	-0.319085	0.00651564	0.040573	Lyar	5	38220470	38234306	+	2401	protein_coding	Ly1 antibody reactive clone [Source:MGI Symbol;Acc:MGI:107470]	-	1177	2067	1570	1721	2306	1906	1804	92.9353	137.957	117.872	110.905	146.232	132.589	117.987
ENSMUSG00000040021	1701.16	1425.04	1317.55	1530.44	1756.57	1837.8	2047.38	-0.31908	0.00228607	0.0181208	Lats1	10	7681214	7716460	+	7297	protein_coding	large tumor suppressor [Source:MGI Symbol;Acc:MGI:1333883]	-	1476	1544	1330	1706	1837	1752	2023	19.3603	17.1188	16.5877	18.263	19.3515	20.2461	21.9795
ENSMUSG00000058706	577.426	600.844	651.842	591.183	701.862	824.493	760.05	-0.318836	0.00151076	0.0131779	0610030E20Rik	6	72347317	72353148	+	5832	protein_coding	RIKEN cDNA 0610030E20 gene [Source:MGI Symbol;Acc:MGI:1915614]	-	501	651	658	659	734	786	751	11.6884	12.8381	14.5966	12.5479	13.7529	16.1555	14.5129
ENSMUSG00000028572	4501.85	4604.62	4055.68	4585.93	5237.19	5729.49	5722.13	-0.318403	6.50604e-05	0.000977859	Hook1	4	95967240	96025413	+	8318	protein_coding	hook microtubule tethering protein 1 [Source:MGI Symbol;Acc:MGI:1925213]	-	3906	4989	4094	5112	5477	5462	5654	159.583	172.293	159.041	170.455	179.711	196.602	191.34
ENSMUSG00000026761	754.918	812.201	772.7	680.892	893.106	993.377	960.436	-0.317661	0.00111101	0.0103685	Orc4	2	48902824	48950277	-	7458	protein_coding	origin recognition complex, subunit 4 [Source:MGI Symbol;Acc:MGI:1347043]	-	655	880	780	759	934	947	949	40.408	45.889	45.7539	38.215	46.2756	51.4703	48.4939
ENSMUSG00000030726	812.546	784.512	811.335	816.352	998.289	995.475	1037.35	-0.31753	0.00011988	0.00163664	Pold3	7	100082111	100121565	-	4601	protein_coding	polymerase (DNA-directed), delta 3, accessory subunit [Source:MGI Symbol;Acc:MGI:1915217]	-	705	850	819	910	1044	949	1025	39.4801	40.2354	43.6094	41.5907	46.9535	46.8205	47.5453
ENSMUSG00000048000	2411.13	2321.23	2152.66	2428.42	2765.38	2917.19	3069.55	-0.317299	9.41248e-05	0.00133139	Gigyf2	1	87326998	87450796	+	14216	protein_coding	GRB10 interacting GYF protein 2 [Source:MGI Symbol;Acc:MGI:2138584]	-	2092	2515	2173	2707	2892	2781	3033	75.1706	76.3879	74.2427	79.3854	83.4571	88.0376	90.2721
[truncated: 292 more rows]
