# Supplementary material for: Homeostatic plasticity in the retina is associated with maintenance of night vision during retinal degenerative disease
Source: eLife. 2020 Sep 22;9:e59422. doi: 10.7554/eLife.59422 (PMC7529457; doi:10.7554/eLife.59422)
Supplement: Supplementary file 12. [file elife-59422-supp12.xlsx]

## Sheet: P23HvsWT_DEG_up
gene_id	P23H_11	P23H_13	P23H_6	P23H_8	WT_12	WT_7	WT_9	log2foldchange	pvalue	padjust	gene_name	gene_chr	gene_start	gene_end	gene_strand	gene_length	gene_biotype	gene_description	tf_family	P23H_11_readcount	P23H_13_readcount	P23H_6_readcount	P23H_8_readcount	WT_12_readcount	WT_7_readcount	WT_9_readcount	P23H_11_fpkm	P23H_13_fpkm	P23H_6_fpkm	P23H_8_fpkm	WT_12_fpkm	WT_7_fpkm	WT_9_fpkm
ENSMUSG00000028635	1626.24	2211.4	3069.01	2001.41	91.7967	97.5545	61.7351	4.07133	3.22357e-117	1.9364e-113	Edn2	4	120161206	120167360	+	1462	protein_coding	endothelin 2 [Source:MGI Symbol;Acc:MGI:95284]	-	1411	2396	3098	2231	96	93	61	65.6126	94.1775	136.978	84.6692	3.58517	3.80999	2.34955
ENSMUSG00000073418	2354.65	1971.43	3054.15	2850.95	141.52	124.828	178.121	3.71916	9.41511e-134	8.48349e-130	C4b	17	34728380	34743882	-	5695	protein_coding	complement component 4B (Chido blood group) [Source:MGI Symbol;Acc:MGI:88228]	-	2043	2136	3083	3178	148	119	176	60.4665	53.4377	86.7617	76.7656	3.51793	3.10295	4.31473
ENSMUSG00000041782	507.121	452.248	655.804	549.916	30.5989	25.1754	47.5664	3.39567	1.32467e-80	5.96798e-77	Lad1	1	135818598	135833342	+	3400	protein_coding	ladinin [Source:MGI Symbol;Acc:MGI:109343]	-	440	490	662	613	32	24	47	19.126	18.0039	27.3613	21.7469	1.11712	0.919101	1.69225
ENSMUSG00000026414	437.968	390.41	580.516	479.046	34.4238	31.4692	35.4218	3.28021	1.44004e-78	5.19018e-75	Tnnt2	1	135836354	135852260	+	7752	protein_coding	troponin T2, cardiac [Source:MGI Symbol;Acc:MGI:104597]	-	380	423	586	534	36	30	35	20.4707	19.2614	30.0161	23.4777	1.55751	1.4238	1.56175
ENSMUSG00000071637	810.24	1010.64	1708.86	1077.41	112.833	108.044	91.0845	2.94205	4.13166e-57	8.27296e-54	Cebpd	16	15887286	15891031	+	3746	protein_coding	CCAAT/enhancer binding protein (C/EBP), delta [Source:MGI Symbol;Acc:MGI:103573]	-	703	1095	1725	1201	118	103	90	22.8893	30.1364	53.404	31.9143	3.08559	2.95458	2.42725
ENSMUSG00000030111	904.749	842.658	1673.19	1174.29	91.7967	109.093	129.542	2.86081	2.4455e-53	4.00639e-50	A2m	6	121635376	121679227	+	7021	protein_coding	alpha-2-macroglobulin [Source:MGI Symbol;Acc:MGI:2449119]	-	785	913	1689	1309	96	104	128	21.0191	20.6641	43.0014	28.6056	2.0644	2.45335	2.8389
ENSMUSG00000107256	133.695	107.986	294.22	199.154	6.69351	7.34281	12.1446	2.71875	1.18371e-28	6.46413e-26	Gm13821	5	114838875	114842075	-	3201	TEC	predicted gene 13821 [Source:MGI Symbol;Acc:MGI:3652003]	-	116	117	297	222	7	7	12	2.46365	2.10043	5.99772	3.84805	0.119398	0.130979	0.211105
ENSMUSG00000085304	78.3732	73.8364	138.69	90.6061	0.956216	4.19589	4.0482	2.70585	2.84237e-27	1.42284e-24	Gm12802	4	107126613	107136252	+	1813	antisense	predicted gene 12802 [Source:MGI Symbol;Acc:MGI:3649683]	-	68	80	140	101	1	4	4	2.54987	2.53571	4.99167	3.09099	0.0301154	0.132145	0.124241
ENSMUSG00000021091	825.224	737.441	1408.69	979.623	75.5411	34.6161	62.7471	2.68729	1.45203e-28	7.69616e-26	Serpina3n	12	104406729	104414329	+	2064	protein_coding	serine (or cysteine) peptidase inhibitor, clade A, member 3N [Source:MGI Symbol;Acc:MGI:105045]	-	716	799	1422	1092	79	33	62	23.5836	22.2456	44.5354	29.3553	2.0898	0.957619	1.69155
ENSMUSG00000029718	1437.23	1817.3	3037.31	1830.06	134.826	183.57	150.796	2.67337	2.16161e-31	1.55817e-28	Pcolce	5	137605103	137613784	-	3823	protein_coding	procollagen C-endopeptidase enhancer protein [Source:MGI Symbol;Acc:MGI:105099]	-	1247	1969	3066	2040	141	175	149	84.7762	113.15	198.193	113.189	7.69849	10.4816	8.39052
ENSMUSG00000108900	58.7799	62.761	132.746	95.9887	0.956216	3.14692	0	2.63792	1.01519e-24	3.73363e-22	Ccdc194	8	71520120	71525711	-	1820	protein_coding	coiled-coil domain containing 194 [Source:MGI Symbol;Acc:MGI:3588239]	-	51	68	134	107	1	3	0	1.90505	2.14707	4.75936	3.26201	0.0299996	0.0987276	0
ENSMUSG00000054779	449.493	508.548	709.299	571.447	56.4167	88.1137	73.8797	2.57383	5.42105e-51	8.14106e-48	Fgf2os	3	37335332	37349740	-	1441	antisense	fibroblast growth factor 2, opposite strand [Source:MGI Symbol;Acc:MGI:3649376]	-	390	551	716	637	59	84	73	18.3996	21.9733	32.1192	24.5273	2.2355	3.49143	2.85273
ENSMUSG00000037225	3178.72	2712.57	3360.25	3241.19	459.94	483.577	521.206	2.57295	5.96052e-143	1.07415e-138	Fgf2	3	37348346	37410108	+	6782	protein_coding	fibroblast growth factor 2 [Source:MGI Symbol;Acc:MGI:95516]	-	2758	2939	3392	3613	481	461	515	152.192	137.087	177.976	162.716	21.3167	22.4119	23.5396
ENSMUSG00000053175	118.712	150.442	335.827	142.637	11.4746	7.34281	12.1446	2.57198	1.62756e-25	6.51785e-23	Bcl3	7	19808462	19822770	-	2475	protein_coding	B cell leukemia/lymphoma 3 [Source:MGI Symbol;Acc:MGI:88140]	-	103	163	339	159	12	7	12	9.12955	12.2124	28.5706	11.502	0.854225	0.546627	0.881025
ENSMUSG00000055368	140.611	119.984	312.052	197.36	14.3432	11.5387	17.2049	2.50167	1.07822e-25	4.51875e-23	Slc6a2	8	92960079	93001667	+	6290	protein_coding	solute carrier family 6 (neurotransmitter transporter, noradrenalin), member 2 [Source:MGI Symbol;Acc:MGI:1270850]	-	122	130	315	220	15	11	17	1.36035	1.22528	3.33972	2.00207	0.134326	0.10806	0.157013
ENSMUSG00000105063	366.51	324.88	517.115	460.207	54.5043	65.0363	54.6507	2.46611	5.79537e-45	8.03372e-42	Gm43488	3	37339017	37341520	+	2504	TEC	predicted gene 43488 [Source:MGI Symbol;Acc:MGI:5663625]	-	318	352	522	513	57	62	54	8.63377	8.07823	13.4757	11.3673	1.24287	1.48302	1.2144
ENSMUSG00000020932	1909.77	1640.09	3085.85	2291.17	244.791	340.916	387.615	2.42158	7.06904e-44	8.49274e-41	Gfap	11	102887336	102900912	-	4218	protein_coding	glial fibrillary acidic protein [Source:MGI Symbol;Acc:MGI:95697]	-	1657	1777	3115	2554	256	325	383	60.305	54.6661	107.794	75.8608	7.48255	10.4207	11.5458
ENSMUSG00000033488	333.086	354.415	687.505	488.017	75.5411	60.8404	46.5543	2.35002	2.31704e-30	1.49127e-27	Cryzl2	1	157458577	157492638	+	2534	protein_coding	crystallin zeta like 2 [Source:MGI Symbol;Acc:MGI:2448516]	-	289	384	694	544	79	58	46	19.0752	21.4241	43.555	29.3046	4.18771	3.37271	2.51491
ENSMUSG00000016763	144.068	137.52	231.81	191.977	14.3432	19.9305	29.3495	2.31482	3.55432e-26	1.56225e-23	Scube1	15	83604999	83725021	-	9829	protein_coding	signal peptide, CUB domain, EGF-like 1 [Source:MGI Symbol;Acc:MGI:1890616]	-	125	149	234	214	15	19	29	2.16124	2.17761	3.84696	3.01977	0.208288	0.28942	0.415324
ENSMUSG00000023224	484.07	459.632	773.691	645.905	115.702	72.3791	86.0243	2.30077	1.21312e-36	1.04103e-33	Serping1	2	84765387	84775444	-	2325	protein_coding	serine (or cysteine) peptidase inhibitor, clade G, member 1 [Source:MGI Symbol;Acc:MGI:894696]	-	420	498	781	720	121	69	85	19.7601	19.8048	34.938	27.6464	4.57198	2.86002	3.31248
ENSMUSG00000117296	70.3054	94.1415	222.894	95.9887	6.69351	10.4897	3.03615	2.22858	3.19823e-18	5.23958e-16	CT025671.4	17	66193352	66199820	+	3450	lincRNA	novel transcript	-	61	102	225	107	7	10	3	1.20204	1.69898	4.21579	1.72083	0.110781	0.173608	0.0489671
ENSMUSG00000073152	47.2544	46.1478	110.952	49.34	0	2.09795	3.03615	2.15015	1.67351e-16	2.37468e-14	Gm10475	5	21910931	21954014	+	1796	antisense	predicted gene 10475 [Source:MGI Symbol;Acc:MGI:3642283]	-	41	50	112	55	0	2	3	1.55198	1.59982	4.03113	1.69914	0	0.0666979	0.0940627
ENSMUSG00000028270	253.56	227.047	318.986	262.848	47.8108	52.4487	45.5423	2.14079	8.95783e-36	7.33769e-33	Gbp2	3	142620602	142638008	+	2516	protein_coding	guanylate binding protein 2 [Source:MGI Symbol;Acc:MGI:102772]	-	220	246	322	293	50	50	45	8.88153	8.39462	12.3603	9.65382	1.62112	1.77835	1.50478
ENSMUSG00000053113	285.832	397.794	678.589	342.689	65.9789	72.3791	60.723	2.13092	1.65069e-24	5.94941e-22	Socs3	11	117966079	117970047	-	2891	protein_coding	suppressor of cytokine signaling 3 [Source:MGI Symbol;Acc:MGI:1201791]	-	248	431	685	382	69	69	60	15.3833	22.5982	40.4013	19.3387	3.43736	3.77074	3.08278
ENSMUSG00000103073	127.933	122.753	157.512	115.725	27.7303	19.9305	15.1808	2.06706	9.71694e-23	2.87064e-20	Gm37904	1	166798528	166798839	-	312	processed_pseudogene	predicted gene, 37904 [Source:MGI Symbol;Acc:MGI:5611132]	-	111	133	159	129	29	19	15	24.1867	24.4966	32.9426	22.9408	5.07493	3.64743	2.70732
ENSMUSG00000037405	70.3054	69.2217	80.2419	72.6643	10.5184	9.44076	8.0964	2.05491	1.53652e-18	2.66247e-16	Icam1	9	21015985	21028817	+	4360	protein_coding	intercellular adhesion molecule 1 [Source:MGI Symbol;Acc:MGI:96392]	-	61	75	81	81	11	9	8	1.75054	1.8193	2.21022	1.89711	0.253521	0.227544	0.190164
ENSMUSG00000015312	422.985	630.379	762.794	496.091	142.476	101.75	69.8315	2.04025	1.50375e-25	6.15888e-23	Gadd45b	10	80930073	80932204	+	1589	protein_coding	growth arrest and DNA-damage-inducible 45 beta [Source:MGI Symbol;Acc:MGI:107776]	-	367	683	770	553	149	97	69	27.9085	43.9027	55.6761	34.3211	9.09987	6.49864	4.34624
ENSMUSG00000031805	227.052	239.968	366.537	226.964	32.5113	66.0853	38.4579	2.02709	1.1978e-22	3.42627e-20	Jak3	8	71676296	71690575	+	5352	protein_coding	Janus kinase 3 [Source:MGI Symbol;Acc:MGI:99928]	-	197	260	370	253	34	63	38	3.84521	4.28971	6.86695	4.03033	0.532981	1.08337	0.614374
ENSMUSG00000020227	93.3563	67.3757	204.072	111.239	13.387	13.6366	10.1205	2.01646	5.29778e-16	7.07195e-14	Irak3	10	120141648	120202130	-	3676	protein_coding	interleukin-1 receptor-associated kinase 3 [Source:MGI Symbol;Acc:MGI:1921164]	-	81	73	206	124	14	13	10	2.68751	2.04733	6.49891	3.35779	0.373055	0.380006	0.274828
ENSMUSG00000057596	43.7968	56.3003	73.3074	63.6934	6.69351	6.29384	6.0723	1.96757	2.32939e-15	2.86074e-13	Trim30d	7	104470014	104507849	-	3758	protein_coding	tripartite motif-containing 30D [Source:MGI Symbol;Acc:MGI:3035181]	-	38	61	74	71	7	6	6	1.33165	1.80691	2.46573	2.03063	0.197007	0.185241	0.174161
ENSMUSG00000087236	43.7968	38.7641	109.961	52.9283	1.91243	4.19589	4.0482	1.92745	1.38542e-13	1.28034e-11	Kif28	1	179695297	179745271	-	3552	protein_coding	kinesin family member 28 [Source:MGI Symbol;Acc:MGI:2686151]	-	38	42	111	59	2	4	4	1.00717	0.940957	2.79738	1.27626	0.0425725	0.0934031	0.0878163
ENSMUSG00000036030	414.917	487.32	825.204	694.348	120.483	137.415	123.47	1.91719	3.15707e-25	1.2105e-22	Prtg	9	72806874	72917291	+	9158	protein_coding	protogenin [Source:MGI Symbol;Acc:MGI:2444710]	-	360	528	833	774	126	131	122	5.06504	6.27935	11.1438	8.88766	1.42374	1.6238	1.42179
ENSMUSG00000104866	47.2544	41.533	55.4759	58.3109	2.86865	7.34281	5.06025	1.90884	4.23651e-14	4.2485e-12	Gm42948	5	23200920	23223796	-	578	antisense	predicted gene 42948 [Source:MGI Symbol;Acc:MGI:5663085]	-	41	45	56	65	3	7	5	4.8224	4.47396	6.2629	6.23963	0.283387	0.725369	0.48713
ENSMUSG00000034459	250.103	156.902	347.715	296.937	56.4167	40.9099	51.6146	1.90634	7.16082e-20	1.46642e-17	Ifit1	19	34640871	34650009	+	2656	protein_coding	interferon-induced protein with tetratricopeptide repeats 1 [Source:MGI Symbol;Acc:MGI:99450]	-	217	170	351	331	59	39	51	5.55442	3.67814	8.54268	6.9147	1.21286	0.879478	1.0813
ENSMUSG00000032495	2218.65	2227.09	2746.06	2500.19	580.423	644.069	654.797	1.87175	1.14055e-72	2.93627e-69	Lrrc2	9	110951545	110984066	+	3757	protein_coding	leucine rich repeat containing 2 [Source:MGI Symbol;Acc:MGI:1921499]	-	1925	2413	2772	2787	607	614	647	81.0839	85.9136	111.021	95.8091	20.5339	22.7852	22.5737
ENSMUSG00000068699	204.001	123.676	250.632	217.993	34.4238	29.3712	49.5905	1.86502	2.89441e-18	4.78533e-16	Flnc	6	29433256	29461883	+	9402	protein_coding	filamin C, gamma [Source:MGI Symbol;Acc:MGI:95557]	-	177	134	253	243	36	28	49	1.88726	1.20771	2.565	2.11462	0.308277	0.263026	0.432763
ENSMUSG00000022146	537.087	429.174	588.441	497.885	92.7529	138.464	143.711	1.83322	1.30425e-31	9.79326e-29	Osmr	15	6813577	6874969	-	12113	protein_coding	oncostatin M receptor [Source:MGI Symbol;Acc:MGI:1330819]	-	466	465	594	555	97	132	142	10.0002	8.43482	12.1204	9.72034	1.67176	2.49561	2.52409
ENSMUSG00000029338	1445.29	1257.99	1323.5	1056.77	254.353	363.994	356.242	1.82012	6.41703e-40	6.08638e-37	Antxr2	5	97882783	98031043	-	6655	protein_coding	anthrax toxin receptor 2 [Source:MGI Symbol;Acc:MGI:1919164]	-	1254	1363	1336	1178	266	347	352	28.6081	26.2838	28.9805	21.9332	4.87362	6.97432	6.65164
ENSMUSG00000030921	101.424	76.6053	125.811	88.812	14.3432	15.7346	23.2772	1.81055	1.23475e-15	1.58938e-13	Trim30a	7	104409025	104465193	-	4111	protein_coding	tripartite motif-containing 30A [Source:MGI Symbol;Acc:MGI:98178]	-	88	83	127	99	15	15	23	3.88733	3.09918	5.33434	3.56919	0.532156	0.583769	0.841573
ENSMUSG00000057802	319.255	295.346	444.798	326.541	71.7162	96.5055	82.9881	1.80419	1.13851e-26	5.39925e-24	Gm10030	9	110989499	111008029	+	4355	processed_transcript	predicted gene 10030 [Source:MGI Symbol;Acc:MGI:3641798]	-	277	320	449	364	75	92	82	11.3649	11.0978	17.5162	12.1886	2.4713	3.32548	2.78672
ENSMUSG00000031636	648.884	692.217	828.176	665.641	200.805	202.452	173.061	1.76515	3.01552e-44	3.88162e-41	Pdlim3	8	45885461	45919548	+	5147	protein_coding	PDZ and LIM domain 3 [Source:MGI Symbol;Acc:MGI:1859274]	-	563	750	836	742	210	193	171	20.7678	23.3853	29.3222	22.3384	6.22129	6.27221	5.22484
ENSMUSG00000042613	2736.15	2346.15	2719.31	2703.83	745.848	694.42	800.532	1.7529	1.47502e-77	4.43023e-74	Pbxip1	3	89436706	89450952	+	4674	protein_coding	pre B cell leukemia transcription factor interacting protein 1 [Source:MGI Symbol;Acc:MGI:2441670]	-	2374	2542	2745	3014	780	662	791	112.863	102.152	124.086	116.945	29.7814	27.7275	31.1489
ENSMUSG00000035200	94.5088	107.986	149.587	108.548	26.774	20.9795	25.3013	1.74898	2.09084e-16	2.92086e-14	Chrnb4	9	55028154	55048779	-	3723	protein_coding	cholinergic receptor, nicotinic, beta polypeptide 4 [Source:MGI Symbol;Acc:MGI:87892]	-	82	117	151	121	28	20	25	1.49737	1.80593	2.6218	1.80329	0.410631	0.321755	0.378137
ENSMUSG00000033355	43.7968	51.6855	84.2045	71.7672	10.5184	10.4897	5.06025	1.74819	2.68295e-12	1.96504e-10	Rtp4	16	23520291	23614222	+	2131	protein_coding	receptor transporter protein 4 [Source:MGI Symbol;Acc:MGI:1915025]	-	38	56	85	80	11	10	5	2.11754	2.63776	4.50375	3.63834	0.492288	0.49094	0.230788
ENSMUSG00000037921	139.458	131.983	193.175	172.241	40.1611	38.812	35.4218	1.71704	5.4824e-19	1.02915e-16	Ddx60	8	61928087	62038244	+	8684	protein_coding	DEAD (Asp-Glu-Ala-Asp) box polypeptide 60 [Source:MGI Symbol;Acc:MGI:2384570]	-	121	143	195	192	42	37	35	2.63319	2.63047	4.03496	3.41007	0.734048	0.709381	0.630898
ENSMUSG00000035929	255.865	291.654	429.938	363.322	102.315	66.0853	81.9761	1.70943	1.42731e-20	3.25588e-18	H2-Q4	17	35379617	35385290	+	2596	protein_coding	histocompatibility 2, Q region locus 4 [Source:MGI Symbol;Acc:MGI:95933]	-	222	316	434	405	107	63	81	6.87898	8.27672	12.787	10.2422	2.66277	1.71986	2.07898
ENSMUSG00000001025	141.763	240.891	382.387	169.55	56.4167	40.9099	41.4941	1.70713	9.03134e-14	8.56599e-12	S100a6	3	90612882	90624181	+	1367	protein_coding	S100 calcium binding protein A6 (calcyclin) [Source:MGI Symbol;Acc:MGI:1339467]	-	123	261	386	189	59	39	41	14.4422	25.9042	43.0947	18.1116	5.56365	4.03436	3.98756
ENSMUSG00000108085	55.3223	101.525	166.428	117.519	16.2557	19.9305	20.241	1.69994	2.56505e-12	1.90225e-10	A930014E10Rik	6	142971752	142973818	+	546	lincRNA	RIKEN cDNA A930014E10 gene [Source:MGI Symbol;Acc:MGI:1925685]	-	48	110	168	131	17	19	20	5.97663	11.5773	19.8899	13.3123	1.69998	2.08425	2.06272
ENSMUSG00000090399	221.289	166.132	199.119	234.141	53.5481	49.3017	55.6628	1.69677	4.25275e-22	1.14386e-19	Gm38399	1	135606447	135688105	-	1645	lincRNA	predicted gene, 38399 [Source:MGI Symbol;Acc:MGI:5620007]	-	192	180	201	261	56	47	55	7.93492	6.28803	7.89852	8.80335	1.8587	1.71128	1.88278
ENSMUSG00000016758	24.2035	59.0691	78.2607	42.1633	5.7373	3.14692	5.06025	1.67431	1.30728e-10	6.88846e-09	Bik	15	83526862	83544634	+	1591	protein_coding	BCL2-interacting killer [Source:MGI Symbol;Acc:MGI:1206591]	-	21	64	79	47	6	3	5	1.64288	4.23222	5.87655	3.0009	0.37698	0.206771	0.324006
ENSMUSG00000034845	295.052	360.876	468.573	377.675	117.615	102.799	82.9881	1.66868	2.85101e-23	8.70813e-21	Plvap	8	71497765	71511752	-	1987	protein_coding	plasmalemma vesicle associated protein [Source:MGI Symbol;Acc:MGI:1890497]	-	256	391	473	421	123	98	82	8.7589	11.308	15.3879	11.7559	3.37982	2.95404	2.3239
ENSMUSG00000044646	150.984	154.134	206.053	166.859	53.5481	44.0569	33.3977	1.63957	6.97298e-18	1.11204e-15	Zbtb7c	18	75820178	76148561	+	4729	protein_coding	zinc finger and BTB domain containing 7C [Source:MGI Symbol;Acc:MGI:2443302]	ZBTB	131	167	208	186	56	42	33	2.65215	2.85788	4.00404	3.07331	0.910529	0.74913	0.553395
ENSMUSG00000067399	147.526	125.522	167.418	187.492	29.6427	51.3997	36.4338	1.6377	3.25393e-16	4.44235e-14	Trim43c	9	88839164	88848190	+	1990	protein_coding	tripartite motif-containing 43C [Source:MGI Symbol;Acc:MGI:3647365]	-	128	136	169	209	31	49	36	4.54886	4.08537	5.71067	6.06184	0.884775	1.53416	1.05972
ENSMUSG00000034394	56.4748	51.6855	107.98	45.7516	10.5184	5.24487	12.1446	1.62474	1.79258e-10	9.30951e-09	Lif	11	4257557	4272514	+	4350	protein_coding	leukemia inhibitory factor [Source:MGI Symbol;Acc:MGI:96787]	-	49	56	109	51	11	5	12	1.21666	1.17534	2.57341	1.0335	0.219354	0.109377	0.246803
ENSMUSG00000057469	1332.34	1441.66	2329.99	1779.83	507.751	483.577	552.58	1.57259	2.41627e-24	8.53794e-22	E2f6	12	16810963	16839742	+	5663	protein_coding	E2F transcription factor 6 [Source:MGI Symbol;Acc:MGI:1354159]	E2F	1156	1562	2352	1984	531	461	546	43.1574	49.2923	83.4916	60.4512	15.921	15.1628	16.8844
ENSMUSG00000032372	80.6783	71.9905	108.971	91.5032	16.2557	27.2733	18.2169	1.57172	2.33883e-12	1.76352e-10	Plscr2	9	92275602	92297752	+	3180	protein_coding	phospholipid scramblase 2 [Source:MGI Symbol;Acc:MGI:1270860]	-	70	78	110	102	17	26	18	3.5251	3.32023	5.26713	4.19218	0.687546	1.15353	0.750829
ENSMUSG00000058952	130.238	102.448	208.035	146.226	40.1611	27.2733	39.47	1.56917	5.63168e-13	4.65544e-11	Cfi	3	129835884	129875332	+	2220	protein_coding	complement component factor i [Source:MGI Symbol;Acc:MGI:105937]	-	113	111	210	163	42	26	39	5.62799	4.67303	9.94494	6.62565	1.67998	1.14085	1.60892
ENSMUSG00000042717	59.9324	60.9151	68.3542	84.3265	17.2119	12.5877	15.1808	1.56681	1.39987e-11	8.88276e-10	Ppp1r3a	6	14713977	14755274	-	6965	protein_coding	protein phosphatase 1, regulatory subunit 3A [Source:MGI Symbol;Acc:MGI:2153588]	-	52	66	69	94	18	12	15	0.507563	0.544541	0.640388	0.748825	0.141103	0.103193	0.121275
ENSMUSG00000111157	40.3391	81.2201	146.615	70.8701	16.2557	14.6856	6.0723	1.55546	1.45103e-09	6.4248e-08	Gm47887	9	55064927	55067463	-	1295	lincRNA	predicted gene, 47887 [Source:MGI Symbol;Acc:MGI:6097116]	-	35	88	148	79	17	14	6	1.83741	3.905	7.38767	3.38478	0.716746	0.647511	0.260906
ENSMUSG00000029561	459.866	433.789	727.131	645.905	196.98	138.464	166.988	1.5318	1.49143e-18	2.60943e-16	Oasl2	5	114896936	114912234	+	6374	protein_coding	2'-5' oligoadenylate synthetase-like 2 [Source:MGI Symbol;Acc:MGI:1344390]	-	399	470	734	720	206	132	165	20.4259	20.338	35.7284	30.0821	8.46946	5.95339	6.99662
ENSMUSG00000024206	465.629	461.478	529.002	470.973	140.564	172.032	154.844	1.52952	3.88768e-34	3.04608e-31	Rfx2	17	56775897	56831013	-	7311	protein_coding	regulatory factor X, 2 (influences HLA class II expression) [Source:MGI Symbol;Acc:MGI:106583]	RFX	404	500	534	525	147	164	153	11.2888	11.8096	14.1878	11.9727	3.29884	4.03729	3.54121
ENSMUSG00000020641	77.2206	70.1446	95.1015	91.5032	19.1243	17.8325	25.3013	1.52692	3.97627e-12	2.78819e-10	Rsad2	12	26442746	26456452	-	4335	protein_coding	radical S-adenosyl methionine domain containing 2 [Source:MGI Symbol;Acc:MGI:1929628]	-	67	76	96	102	20	17	25	1.62676	1.55978	2.2163	2.02123	0.389994	0.363647	0.502787
ENSMUSG00000024697	251.255	223.355	254.595	223.376	78.4097	70.2812	72.8676	1.52497	2.06991e-23	6.66105e-21	Gna14	19	16435667	16610818	+	3383	protein_coding	guanine nucleotide binding protein, alpha 14 [Source:MGI Symbol;Acc:MGI:95769]	-	218	242	257	249	82	67	72	4.38089	4.11075	4.91073	4.08386	1.32342	1.18621	1.19849
ENSMUSG00000023031	63.3901	56.3003	72.3168	65.4876	16.2557	14.6856	14.1687	1.51789	4.02004e-11	2.29985e-09	Cela1	15	100674421	100687921	-	2306	protein_coding	chymotrypsin-like elastase family, member 1 [Source:MGI Symbol;Acc:MGI:95314]	-	55	61	73	73	17	14	14	5.85153	5.48576	7.38478	6.33863	1.45256	1.31225	1.23376
ENSMUSG00000028268	159.051	155.979	280.351	229.655	48.767	65.0363	59.711	1.4935	1.5322e-13	1.39454e-11	Gbp3	3	142560026	142573209	+	3265	protein_coding	guanylate binding protein 3 [Source:MGI Symbol;Acc:MGI:1926263]	-	138	169	283	256	51	62	59	6.14797	6.36415	11.988	9.30805	1.82474	2.43347	2.17721
ENSMUSG00000027078	115.255	133.829	251.623	171.344	53.5481	40.9099	35.4218	1.48946	1.46e-11	9.16747e-10	Ube2l6	2	84798828	84810335	+	1996	protein_coding	ubiquitin-conjugating enzyme E2L 6 [Source:MGI Symbol;Acc:MGI:1914500]	-	100	145	254	191	56	39	35	7.56219	9.26864	18.2637	11.7882	3.40106	2.59832	2.19235
ENSMUSG00000030341	328.476	329.495	438.854	354.351	127.177	109.093	116.386	1.48083	1.57983e-23	5.17638e-21	Tnfrsf1a	6	125349362	125362484	+	2591	protein_coding	tumor necrosis factor receptor superfamily, member 1a [Source:MGI Symbol;Acc:MGI:1314884]	-	285	357	443	395	133	104	115	22.9567	24.3071	33.9294	25.9674	8.6039	7.38039	7.67287
ENSMUSG00000097177	640.816	563.003	721.187	749.968	215.149	201.403	250.989	1.47771	6.80433e-29	3.8319e-26	9330159M07Rik	9	88840236	88858870	-	5332	processed_transcript	RIKEN cDNA 9330159M07 gene [Source:MGI Symbol;Acc:MGI:2442519]	-	556	610	728	836	225	192	248	25.7137	23.8463	32.0132	31.5546	8.35702	7.82298	9.50029
ENSMUSG00000035692	57.6273	118.138	207.044	130.078	38.2486	9.44076	18.2169	1.4688	9.68045e-09	3.71173e-07	Isg15	4	156199424	156200818	-	756	protein_coding	ISG15 ubiquitin-like modifier [Source:MGI Symbol;Acc:MGI:1855694]	-	50	128	209	145	40	9	18	4.4963	9.72962	17.8706	10.6419	2.88885	0.713032	1.34077
ENSMUSG00000025492	132.543	224.278	309.08	235.038	62.154	60.8404	67.8074	1.46665	1.18492e-12	9.2439e-11	Ifitm3	7	141009586	141010770	-	678	protein_coding	interferon induced transmembrane protein 3 [Source:MGI Symbol;Acc:MGI:1913391]	-	115	243	312	262	65	58	67	11.5312	20.5961	29.7468	21.441	5.23444	5.12374	5.56477
ENSMUSG00000001604	289.289	309.19	274.408	309.496	111.877	73.4281	104.241	1.45638	2.99296e-21	7.28868e-19	Tcea3	4	136247729	136274898	+	1400	protein_coding	transcription elongation factor A (SII), 3 [Source:MGI Symbol;Acc:MGI:1196908]	-	251	335	277	345	117	70	103	18.4675	20.8344	19.3786	20.7167	6.91354	4.53748	6.27722
ENSMUSG00000029298	167.119	154.134	204.072	228.758	63.1102	44.0569	64.7712	1.45107	1.09221e-14	1.20016e-12	Gbp9	5	105077630	105139539	-	5173	protein_coding	guanylate-binding protein 9 [Source:MGI Symbol;Acc:MGI:3605620]	-	145	167	206	255	66	42	64	3.10968	3.02737	4.20072	4.46328	1.13677	0.793558	1.1369
ENSMUSG00000056427	82.9834	49.8396	89.1577	76.2527	17.2119	17.8325	20.241	1.44554	4.74498e-10	2.31106e-08	Slit3	11	35121224	35708507	+	6067	protein_coding	slit guidance ligand 3 [Source:MGI Symbol;Acc:MGI:1315202]	-	72	54	90	85	18	17	20	2.64016	1.67376	3.13797	2.5438	0.530089	0.549196	0.607467
ENSMUSG00000028599	91.0512	71.9905	80.2419	74.4585	23.9054	18.8815	22.2651	1.44001	3.06619e-11	1.79402e-09	Tnfrsf1b	4	145213463	145246870	-	3818	protein_coding	tumor necrosis factor receptor superfamily, member 1b [Source:MGI Symbol;Acc:MGI:1314883]	-	79	78	81	83	25	18	22	2.56238	2.13851	2.4981	2.19715	0.651231	0.514363	0.591063
ENSMUSG00000067642	64.5426	54.4544	48.5414	33.1923	10.5184	7.34281	12.1446	1.43553	9.90999e-09	3.79168e-07	Adgrf3	5	30193431	30205722	-	3285	protein_coding	adhesion G protein-coupled receptor F3 [Source:MGI Symbol;Acc:MGI:2685887]	-	56	59	49	37	11	7	12	2.69435	2.39948	2.24166	1.45289	0.425047	0.296718	0.478235
ENSMUSG00000005087	531.324	401.486	575.563	521.21	146.301	152.101	209.494	1.4287	2.62155e-20	5.69192e-18	Cd44	2	102811141	102901665	-	6776	protein_coding	CD44 antigen [Source:MGI Symbol;Acc:MGI:88338]	-	461	435	581	581	153	145	207	11.2212	8.95007	13.4468	11.5419	2.99093	3.10946	4.17351
ENSMUSG00000060802	707.664	910.034	1026.3	792.131	376.749	254.9	214.555	1.42474	5.67736e-18	9.13498e-16	B2m	2	122147686	122153083	+	860	protein_coding	beta-2 microglobulin [Source:MGI Symbol;Acc:MGI:88127]	-	614	986	1036	883	394	243	212	48.5375	65.885	77.8712	56.9686	25.0141	16.9237	13.8816
ENSMUSG00000020407	14.9831	27.6887	43.5882	33.1923	3.82486	2.09795	2.0241	1.41659	6.28361e-08	2.09698e-06	Upp1	11	9118103	9136170	+	1961	protein_coding	uridine phosphorylase 1 [Source:MGI Symbol;Acc:MGI:1097668]	-	13	30	44	37	4	2	2	1.13452	2.21305	3.65116	2.63535	0.280355	0.153773	0.144576
ENSMUSG00000025885	1622.79	1365.05	1487.94	1575.29	516.357	504.556	613.303	1.41099	4.59007e-41	5.16985e-38	Myo5b	18	74440936	74771493	+	9766	protein_coding	myosin VB [Source:MGI Symbol;Acc:MGI:106598]	-	1408	1479	1502	1756	540	481	606	46.5799	41.3584	47.2469	47.4118	14.3472	14.0192	16.6059
ENSMUSG00000060044	57.6273	59.0691	81.2326	72.6643	7.64973	12.5877	26.3133	1.39408	1.37116e-08	5.07384e-07	Tmem26	10	68723646	68782650	+	5282	protein_coding	transmembrane protein 26 [Source:MGI Symbol;Acc:MGI:2143537]	-	50	64	82	81	8	12	26	1.39312	1.50729	2.1724	1.84191	0.179014	0.294564	0.600048
ENSMUSG00000051435	190.17	156.902	384.369	300.525	71.7162	71.3302	79.952	1.39388	1.17575e-10	6.25021e-09	Fhad1	4	141890438	142015082	-	6141	protein_coding	forkhead-associated (FHA) phosphopeptide binding domain 1 [Source:MGI Symbol;Acc:MGI:1920323]	-	165	170	388	335	75	68	79	5.87297	5.11474	13.1315	9.73161	2.14395	2.13238	2.32914
ENSMUSG00000063558	78.3732	77.5283	124.821	86.1207	26.774	28.3223	22.2651	1.39199	2.86658e-10	1.45108e-08	Aox1	1	58029931	58106413	+	8690	protein_coding	aldehyde oxidase 1 [Source:MGI Symbol;Acc:MGI:88035]	-	68	84	126	96	28	27	22	0.851994	0.889626	1.50109	0.981669	0.28175	0.298039	0.228321
ENSMUSG00000097828	990.038	1028.17	1408.69	1134.82	374.837	460.499	381.543	1.38771	2.21754e-25	8.68745e-23	6430562O15Rik	13	99396924	99412876	-	5975	processed_transcript	RIKEN cDNA 6430562O15 gene [Source:MGI Symbol;Acc:MGI:2444982]	-	859	1114	1422	1265	392	439	377	18.17	19.9181	28.6002	21.8383	6.65927	8.18102	6.60538
ENSMUSG00000004040	3115.33	3127.9	3623.77	3112.9	1217.26	1131.84	1264.05	1.386	2.22775e-53	4.00639e-50	Stat3	11	100885098	100939540	-	9527	protein_coding	signal transducer and activator of transcription 3 [Source:MGI Symbol;Acc:MGI:103038]	STAT	2703	3389	3658	3470	1273	1079	1249	108.928	115.442	140.166	114.127	41.2002	38.3085	41.6917
ENSMUSG00000036887	176.34	268.58	350.687	296.04	105.184	88.1137	58.6989	1.38425	7.59644e-12	5.08905e-10	C1qa	4	136895917	136898803	-	1040	protein_coding	complement component 1, q subcomponent, alpha polypeptide [Source:MGI Symbol;Acc:MGI:88223]	-	153	291	354	330	110	84	58	10.0015	16.0793	22.0032	17.6057	5.77492	4.83765	3.14049
ENSMUSG00000012428	42.6442	25.8428	77.27	77.1498	12.4308	9.44076	7.08435	1.37167	1.15222e-07	3.64922e-06	Steap4	5	7960457	7982213	+	3155	protein_coding	STEAP family member 4 [Source:MGI Symbol;Acc:MGI:1923560]	-	37	28	78	86	13	9	7	0.797278	0.509996	1.59812	1.51242	0.224973	0.170857	0.12494
ENSMUSG00000037490	91.0512	64.6069	124.821	98.68	26.774	32.5182	19.229	1.37137	1.60604e-09	7.0764e-08	Slc2a12	10	22645011	22704285	+	4237	protein_coding	solute carrier family 2 (facilitated glucose transporter), member 12 [Source:MGI Symbol;Acc:MGI:3052471]	-	79	70	126	110	28	31	19	2.35353	1.76275	3.56919	2.67455	0.669929	0.813644	0.468857
ENSMUSG00000036896	115.255	161.517	224.876	187.492	73.6286	41.9589	34.4097	1.36091	6.71948e-10	3.14524e-08	C1qc	4	136889804	136893065	-	1931	protein_coding	complement component 1, q subcomponent, C chain [Source:MGI Symbol;Acc:MGI:88225]	-	100	175	227	209	77	40	34	6.32999	9.36357	13.6627	10.7973	3.91447	2.23072	1.78269
ENSMUSG00000023439	12589.3	18510.8	22819.4	15679.3	7184.05	6246.63	4913.5	1.35447	1.0933e-17	1.72828e-15	Gnb3	6	124834240	124840275	-	2632	protein_coding	guanine nucleotide binding protein (G protein), beta 3 [Source:MGI Symbol;Acc:MGI:95785]	-	10923	20056	23035	17478	7513	5955	4855	591.706	918.351	1186.48	772.719	326.856	284.202	217.845
ENSMUSG00000061718	409.154	517.778	626.085	545.431	221.842	167.836	175.085	1.33932	1.44059e-18	2.57038e-16	Ppp1r1b	11	98348404	98357796	+	2928	protein_coding	protein phosphatase 1, regulatory inhibitor subunit 1B [Source:MGI Symbol;Acc:MGI:94860]	-	355	561	632	608	232	160	173	20.2639	27.0682	34.3021	28.3247	10.6356	8.04631	8.17969
ENSMUSG00000113741	286.984	256.582	296.202	270.024	101.359	93.3586	108.289	1.3384	4.55122e-21	1.09357e-18	Gm48236	12	35534421	35590446	+	817	lincRNA	predicted gene, 48236 [Source:MGI Symbol;Acc:MGI:6097644]	-	249	278	299	301	106	89	107	20.7198	19.5538	23.6573	20.4417	7.08386	6.52464	7.37503
ENSMUSG00000030669	32.2713	52.6085	100.055	51.1342	15.2995	11.5387	8.0964	1.33695	1.89799e-07	5.71969e-06	Calca	7	114631478	114636357	-	1684	protein_coding	calcitonin/calcitonin-related polypeptide, alpha [Source:MGI Symbol;Acc:MGI:2151253]	-	28	57	101	57	16	11	8	3.03597	5.22414	10.4128	5.04407	1.39328	1.05078	0.718497
ENSMUSG00000048416	221.289	281.501	437.863	290.657	124.308	100.701	75.9038	1.33571	1.27627e-11	8.15592e-10	Mlf1	3	67374097	67400003	+	1719	protein_coding	myeloid leukemia factor 1 [Source:MGI Symbol;Acc:MGI:1341819]	-	192	305	442	324	130	96	75	15.1426	20.333	33.1459	20.855	8.23422	6.67041	4.89955
ENSMUSG00000034855	36.8815	18.4591	25.7567	16.1476	1.91243	2.09795	2.0241	1.33496	3.16722e-07	8.87659e-06	Cxcl10	5	92346638	92348889	-	2252	protein_coding	chemokine (C-X-C motif) ligand 10 [Source:MGI Symbol;Acc:MGI:1352450]	-	32	20	26	18	2	2	2	1.73346	0.915786	1.3392	0.795797	0.0870107	0.0954498	0.0897405
ENSMUSG00000074151	26.5086	59.9921	100.055	76.2527	15.2995	11.5387	13.1567	1.33322	1.91958e-07	5.75588e-06	Nlrc5	8	94434356	94527272	+	8493	protein_coding	NLR family, CARD domain containing 5 [Source:MGI Symbol;Acc:MGI:3612191]	-	23	65	101	85	16	11	13	0.562661	1.3441	2.34935	1.69709	0.314353	0.237079	0.263425
ENSMUSG00000116256	31.1188	22.1509	28.7286	26.9127	4.78108	2.09795	5.06025	1.33008	3.56883e-07	9.8793e-06	Gm32405	15	73994069	74000913	-	2044	lincRNA	predicted gene, 32405 [Source:MGI Symbol;Acc:MGI:5591564]	-	27	24	29	30	5	2	5	0.898029	0.674743	0.917133	0.814355	0.13356	0.0586054	0.13775
ENSMUSG00000036905	180.95	239.968	285.305	197.36	91.7967	63.9874	74.8917	1.32932	3.5252e-13	3.02513e-11	C1qb	4	136880129	136886187	-	1088	protein_coding	complement component 1, q subcomponent, beta polypeptide [Source:MGI Symbol;Acc:MGI:88224]	-	157	260	288	220	96	61	74	9.81021	13.7326	17.1111	11.2193	4.81758	3.35807	3.83006
ENSMUSG00000087593	17.2882	17.5362	34.6724	15.2505	0	0	2.0241	1.3131	3.12415e-07	8.8107e-06	Gm16174	7	19816553	19818625	+	402	antisense	predicted gene 16174 [Source:MGI Symbol;Acc:MGI:3801857]	-	15	19	35	17	0	0	2	2.53672	2.71604	5.62804	2.34637	0	0	0.28016
ENSMUSG00000038642	389.561	575.924	556.74	507.753	226.623	160.493	165.976	1.31279	7.12074e-17	1.04328e-14	Ctss	3	95526786	95556403	+	1358	protein_coding	cathepsin S [Source:MGI Symbol;Acc:MGI:107341]	-	338	624	562	566	237	153	164	16.9584	26.4639	26.811	23.1766	9.54982	6.76302	6.81564
ENSMUSG00000046879	147.526	167.978	266.482	174.036	63.1102	72.3791	52.6266	1.31036	4.14413e-11	2.36333e-09	Irgm1	11	48861968	48871683	-	5810	protein_coding	immunity-related GTPase family M member 1 [Source:MGI Symbol;Acc:MGI:107567]	-	128	182	269	194	66	69	52	3.19455	3.83948	6.38352	3.95156	1.32289	1.51716	1.07498
ENSMUSG00000064215	204.001	256.582	354.65	260.156	121.439	82.8689	66.7953	1.30643	2.00616e-11	1.22138e-09	Ifi27	12	103434211	103440239	+	1467	protein_coding	interferon, alpha-inducible protein 27 [Source:MGI Symbol;Acc:MGI:1277180]	-	177	278	358	290	127	79	66	16.5291	21.9443	31.7883	22.1024	9.52486	6.49956	5.10523
ENSMUSG00000082361	767.596	829.737	934.175	753.556	295.471	346.161	307.663	1.30556	1.80134e-29	1.11938e-26	Btc	5	91357261	91402994	-	4520	protein_coding	betacellulin, epidermal growth factor family member [Source:MGI Symbol;Acc:MGI:99439]	-	666	899	943	840	309	330	304	21.8837	24.9693	29.4623	22.5264	8.15426	9.55305	8.274
ENSMUSG00000041498	110.645	91.3726	134.727	69.076	30.5989	32.5182	30.3615	1.29678	3.98992e-09	1.62675e-07	Kif14	1	136466343	136531511	+	10358	protein_coding	kinesin family member 14 [Source:MGI Symbol;Acc:MGI:1098226]	-	96	99	136	77	32	31	30	1.85781	1.61944	2.50251	1.21615	0.497345	0.528533	0.48089
ENSMUSG00000087168	2492.96	2024.04	2310.18	2444.57	818.521	832.885	1051.52	1.29635	1.6115e-30	1.07558e-27	Gm15983	16	5254786	5289621	+	4814	antisense	predicted gene 15983 [Source:MGI Symbol;Acc:MGI:3805549]	-	2163	2193	2332	2725	856	794	1039	30.5462	26.1782	31.3139	31.4075	9.70854	9.87877	12.1538
ENSMUSG00000026415	114.102	83.066	139.68	125.593	23.9054	25.1754	53.6387	1.29461	1.38072e-08	5.08833e-07	Fcamr	1	130800902	130814740	+	1911	protein_coding	Fc receptor, IgA, IgM, high affinity [Source:MGI Symbol;Acc:MGI:1927803]	-	99	90	141	140	25	24	53	3.71641	2.85583	5.03287	4.28927	0.753716	0.793746	1.64801
ENSMUSG00000040253	251.255	198.435	290.258	270.024	95.6216	83.9178	97.1568	1.29111	2.67849e-15	3.21794e-13	Gbp7	3	142530342	142550149	+	5614	protein_coding	guanylate binding protein 7 [Source:MGI Symbol;Acc:MGI:2444421]	-	218	215	293	301	100	80	96	3.65488	3.04688	4.67081	4.1186	1.34647	1.18165	1.33316
ENSMUSG00000074896	499.053	435.635	751.897	619.89	244.791	184.619	198.362	1.29091	1.28075e-14	1.39039e-12	Ifit3	19	34583531	34588731	+	1745	protein_coding	interferon-induced protein with tetratricopeptide repeats 3 [Source:MGI Symbol;Acc:MGI:1101055]	-	433	472	759	691	256	176	196	16.8694	15.5437	28.1165	21.9713	8.00997	6.04096	6.32504
ENSMUSG00000086653	10.3729	20.305	41.6069	19.736	0.956216	1.04897	0	1.28917	4.49645e-07	1.21668e-05	9130015L21Rik	2	160016653	160040619	+	606	lincRNA	RIKEN cDNA 9130015L21 gene [Source:MGI Symbol;Acc:MGI:1918863]	-	9	22	42	22	1	1	0	1.00967	2.08621	4.48014	2.0143	0.0900977	0.0988362	0
ENSMUSG00000064246	424.137	351.646	432.91	509.547	174.031	162.591	151.808	1.28366	4.31506e-19	8.36147e-17	Chil1	1	134182176	134190181	+	2804	protein_coding	chitinase-like 1 [Source:MGI Symbol;Acc:MGI:1340899]	-	368	381	437	568	182	155	150	22.7231	19.8859	25.6572	28.6243	9.02548	8.43205	7.67196
ENSMUSG00000028036	33.4239	32.3034	67.3636	40.3691	8.60594	12.5877	6.0723	1.27654	6.89546e-07	1.78539e-05	Ptgfr	3	151796502	151837630	-	6778	protein_coding	prostaglandin F receptor [Source:MGI Symbol;Acc:MGI:97796]	-	29	35	68	45	9	12	6	0.701116	0.715255	1.56318	0.887914	0.174749	0.255596	0.120154
ENSMUSG00000044986	89.8987	107.986	109.961	95.0916	43.9859	33.5671	21.2531	1.2687	2.16656e-09	9.27403e-08	Tst	15	78399556	78405907	-	3163	protein_coding	thiosulfate sulfurtransferase, mitochondrial [Source:MGI Symbol;Acc:MGI:98852]	-	78	117	111	106	46	32	21	2.80867	3.56116	3.80046	3.11514	1.33028	1.01516	0.626354
ENSMUSG00000052837	560.138	576.847	823.223	706.907	296.427	217.137	245.928	1.26826	4.02865e-17	6.20515e-15	Junb	8	84974484	84978718	-	2301	protein_coding	jun B proto-oncogene [Source:MGI Symbol;Acc:MGI:96647]	TF_bZIP	486	625	831	788	310	207	243	28.7307	31.2313	46.7109	38.0191	14.718	10.781	11.899
ENSMUSG00000037820	245.492	198.435	284.314	281.686	105.184	51.3997	106.265	1.26281	1.19782e-10	6.34878e-09	Tgm2	2	158116402	158146436	-	4608	protein_coding	transglutaminase 2, C polypeptide [Source:MGI Symbol;Acc:MGI:98731]	-	213	215	287	314	110	49	105	8.81352	7.51984	11.2917	10.6039	3.65546	1.78627	3.59877
ENSMUSG00000037735	115.255	104.294	120.858	113.93	27.7303	43.0079	47.5664	1.25904	2.05375e-10	1.05144e-08	2810032G03Rik	12	5375870	5416631	+	3173	lincRNA	RIKEN cDNA 2810032G03 gene [Source:MGI Symbol;Acc:MGI:1919919]	-	100	113	122	127	29	41	47	2.97133	2.83812	3.44682	3.07979	0.692035	1.07329	1.15676
ENSMUSG00000104713	107.187	63.6839	127.793	108.548	39.2048	32.5182	22.2651	1.25809	2.94304e-08	1.03993e-06	Gbp6	5	105270702	105293698	-	5954	protein_coding	guanylate binding protein 6 [Source:MGI Symbol;Acc:MGI:2140937]	-	93	69	129	121	41	31	22	1.72135	1.07953	2.2703	1.82784	0.609466	0.505509	0.33729
ENSMUSG00000030717	233.967	363.644	568.628	354.351	138.651	143.709	110.314	1.25776	4.06607e-10	2.00204e-08	Nupr1	7	126623249	126630861	-	2514	protein_coding	nuclear protein transcription regulator 1 [Source:MGI Symbol;Acc:MGI:1891834]	-	203	394	574	395	145	137	109	15.7005	25.7582	42.2122	24.9334	9.0067	9.33513	6.98297
ENSMUSG00000046718	163.662	273.195	466.592	260.156	65.9789	36.7141	19.229	1.25655	1.59081e-06	3.81732e-05	Bst2	8	71534255	71537456	-	903	protein_coding	bone marrow stromal cell antigen 2 [Source:MGI Symbol;Acc:MGI:1916800]	-	142	296	471	290	69	35	19	16.0361	28.2555	50.5754	26.7285	6.25805	3.48225	1.77729
ENSMUSG00000056144	34.5764	47.0707	65.3823	48.4429	16.2557	10.4897	11.1326	1.25429	4.16804e-07	1.13292e-05	Trim34a	7	104244457	104262234	+	2592	protein_coding	tripartite motif-containing 34A [Source:MGI Symbol;Acc:MGI:2137359]	-	30	51	66	54	17	10	11	0.84874	1.21962	1.77544	1.24685	0.386262	0.24925	0.257775
ENSMUSG00000050271	142.916	112.601	288.277	182.109	59.2854	54.5466	59.711	1.25068	1.84617e-08	6.66958e-07	Prag1	8	36094828	36147787	+	9606	protein_coding	PEAK1 related kinase activating pseudokinase 1 [Source:MGI Symbol;Acc:MGI:1196223]	-	124	122	291	203	62	52	59	1.99433	1.65858	4.45016	2.66463	0.80084	0.736817	0.785999
ENSMUSG00000022272	3368.89	2477.21	3887.28	3233.11	1085.3	1211.56	1507.96	1.24732	7.54581e-19	1.38758e-16	Myo10	15	25622525	25813673	+	10122	protein_coding	myosin X [Source:MGI Symbol;Acc:MGI:107716]	-	2923	2684	3924	3604	1135	1155	1490	108.175	83.9617	138.081	108.855	33.7344	37.6584	45.6751
ENSMUSG00000035413	313.493	411.638	396.256	383.955	173.075	120.632	142.699	1.2469	7.67978e-17	1.11611e-14	Tmem98	11	80810175	80822033	+	1633	protein_coding	transmembrane protein 98 [Source:MGI Symbol;Acc:MGI:1923457]	-	272	446	400	428	181	115	141	11.3237	15.6948	15.8339	14.5422	6.05172	4.21794	4.86223
ENSMUSG00000023367	236.272	276.887	236.763	295.143	110.921	103.848	89.0604	1.23827	5.89267e-16	7.80822e-14	Tmem176a	6	48840919	48847071	+	3810	protein_coding	transmembrane protein 176A [Source:MGI Symbol;Acc:MGI:1913308]	-	205	300	239	329	116	99	88	11.9016	14.7222	13.1934	15.5888	5.40863	5.06369	4.23183
ENSMUSG00000089789	21.8984	43.3789	60.4291	52.0312	5.7373	4.19589	15.1808	1.23154	2.33608e-06	5.34353e-05	Rdh1	10	127759721	127768297	+	3930	protein_coding	retinol dehydrogenase 1 (all trans) [Source:MGI Symbol;Acc:MGI:1195275]	-	19	47	61	58	6	4	15	0.328676	0.687248	1.00335	0.818859	0.0833576	0.0609615	0.214932
ENSMUSG00000061232	1048.82	1215.53	1422.56	1265.79	592.854	408.051	484.772	1.22815	4.75478e-20	9.96348e-18	H2-K1	17	33996017	34000333	-	2608	protein_coding	histocompatibility 2, K1, K region [Source:MGI Symbol;Acc:MGI:95904]	-	910	1317	1436	1411	620	389	479	55.1878	67.5131	82.8064	69.8385	30.1976	20.7842	24.062
ENSMUSG00000028709	358.442	371.028	501.264	427.015	178.812	162.591	148.771	1.22798	4.07237e-17	6.21934e-15	Mob3c	4	115828092	115836185	+	2975	protein_coding	MOB kinase activator 3C [Source:MGI Symbol;Acc:MGI:2140623]	-	311	402	506	476	187	155	147	16.2389	17.7428	25.122	20.2847	7.84182	7.13032	6.35783
ENSMUSG00000024338	86.441	75.6823	121.849	85.2236	30.5989	34.6161	28.3374	1.22313	1.15715e-08	4.32637e-07	Psmb8	17	34197721	34201454	+	2736	protein_coding	proteasome (prosome, macropain) subunit, beta type 8 (large multifunctional peptidase 7) [Source:MGI Symbol;Acc:MGI:1346527]	-	75	82	123	95	32	33	28	3.51642	3.24978	5.48343	3.63521	1.20495	1.36312	1.08741
ENSMUSG00000033880	262.781	295.346	359.603	339.997	129.089	103.848	136.627	1.22145	2.33355e-15	2.86074e-13	Lgals3bp	11	118392751	118402092	-	2847	protein_coding	lectin, galactoside-binding, soluble, 3 binding protein [Source:MGI Symbol;Acc:MGI:99554]	-	228	320	363	379	135	99	135	16.1631	19.1752	24.4683	21.9278	7.68602	6.18308	7.92716
ENSMUSG00000036995	557.833	513.163	595.375	610.022	230.448	202.452	263.133	1.21639	1.11211e-22	3.23248e-20	Asap3	4	136206365	136245216	+	4225	protein_coding	ArfGAP with SH3 domain, ankyrin repeat and PH domain 3 [Source:MGI Symbol;Acc:MGI:2684986]	-	484	556	601	680	241	193	260	7.788	7.56234	9.19524	8.93009	3.11442	2.73602	3.46537
ENSMUSG00000020388	229.357	231.662	310.071	244.009	115.702	77.624	99.1809	1.2158	4.34569e-13	3.65952e-11	Pdlim4	11	54054928	54069014	-	2560	protein_coding	PDZ and LIM domain 4 [Source:MGI Symbol;Acc:MGI:1353470]	-	199	251	313	272	121	74	98	15.3214	16.3351	22.9139	17.0916	7.48188	5.01949	6.24982
ENSMUSG00000067586	1301.23	1106.62	1182.83	1410.23	487.67	491.968	579.905	1.20331	2.90514e-26	1.30884e-23	S1pr3	13	51408639	51422797	+	4463	protein_coding	sphingosine-1-phosphate receptor 3 [Source:MGI Symbol;Acc:MGI:1339365]	-	1129	1199	1194	1572	510	469	573	17.1979	15.4383	17.2939	19.5434	6.23921	6.29411	7.22986
ENSMUSG00000056880	50.7121	62.761	62.4104	50.2371	24.8616	11.5387	14.1687	1.20067	5.21972e-07	1.38127e-05	Gadl1	9	115909455	116076176	+	3966	protein_coding	glutamate decarboxylase-like 1 [Source:MGI Symbol;Acc:MGI:1920998]	-	44	68	63	56	26	11	14	1.25632	1.64118	1.7104	1.30497	0.596211	0.276708	0.331109
ENSMUSG00000046805	215.526	152.288	237.754	283.481	93.7092	69.2322	85.0122	1.19808	3.35335e-10	1.67398e-08	Mpeg1	19	12460779	12465284	+	4335	protein_coding	macrophage expressed gene 1 [Source:MGI Symbol;Acc:MGI:1333743]	-	187	165	240	316	98	66	84	2.93265	2.18727	3.5788	4.04456	1.23431	0.911892	1.09117
ENSMUSG00000050174	84.1359	88.6037	95.1015	88.812	35.38	32.5182	29.3495	1.19142	3.01804e-09	1.26484e-07	Nudt6	3	37404910	37420211	-	1677	protein_coding	nudix (nucleoside diphosphate linked moiety X)-type motif 6 [Source:MGI Symbol;Acc:MGI:2387618]	-	73	96	96	99	37	31	29	5.98654	6.65464	7.48569	6.62604	2.43688	2.23973	1.96991
ENSMUSG00000033327	297.357	291.654	398.238	404.588	119.527	132.171	162.94	1.18928	2.22293e-13	1.97337e-11	Tnxb	17	34670535	34719815	+	12209	protein_coding	tenascin XB [Source:MGI Symbol;Acc:MGI:1932137]	-	258	316	402	451	125	126	161	1.62482	1.68218	2.40724	2.31807	0.632228	0.699095	0.839857
ENSMUSG00000030077	485.222	379.335	557.731	426.118	191.243	162.591	206.458	1.18886	1.32724e-15	1.68438e-13	Chl1	6	103510586	103750211	+	12293	protein_coding	cell adhesion molecule L1-like [Source:MGI Symbol;Acc:MGI:1098266]	-	421	411	563	475	200	155	204	7.49445	6.18444	9.52959	6.90109	2.85935	2.43092	3.00803
ENSMUSG00000030579	35.729	47.9937	74.2981	40.3691	20.0805	7.34281	4.0482	1.18797	4.86887e-06	0.000103714	Tyrobp	7	30413760	30417585	+	667	protein_coding	TYRO protein tyrosine kinase binding protein [Source:MGI Symbol;Acc:MGI:1277211]	-	31	52	75	45	21	7	4	3.64621	5.16992	8.38781	4.31975	1.98371	0.725369	0.389704
ENSMUSG00000116056	51.8646	64.6069	80.2419	58.3109	18.1681	22.0284	22.2651	1.18793	2.08945e-07	6.19309e-06	Gm4544	15	102657111	102660468	+	1360	lincRNA	predicted gene 4544 [Source:MGI Symbol;Acc:MGI:3782728]	-	45	70	81	65	19	21	22	3.46465	4.5556	5.92979	4.08438	1.17484	1.42445	1.40302
ENSMUSG00000055538	433.358	408.869	489.377	442.266	178.812	199.305	178.121	1.18441	6.57281e-22	1.74189e-19	Zcchc24	14	25711642	25769039	-	4557	protein_coding	zinc finger, CCHC domain containing 24 [Source:MGI Symbol;Acc:MGI:1919168]	-	376	443	494	493	187	190	176	6.02878	6.00407	7.53141	6.45141	2.40803	2.68396	2.33749
ENSMUSG00000022574	74.9156	95.9874	152.559	87.9149	38.2486	31.4692	35.4218	1.17293	1.47187e-07	4.55748e-06	Naprt	15	75890956	75894481	-	2344	protein_coding	nicotinate phosphoribosyltransferase [Source:MGI Symbol;Acc:MGI:2442664]	-	65	104	154	98	40	30	35	3.72909	5.04339	8.40074	4.58861	1.84301	1.51632	1.66323
ENSMUSG00000059498	47.2544	53.5314	60.4291	60.1051	25.8178	8.39178	14.1687	1.17246	1.71302e-06	4.07259e-05	Fcgr3	1	171051174	171064935	-	1736	protein_coding	Fc receptor, IgG, low affinity III [Source:MGI Symbol;Acc:MGI:95500]	-	41	58	61	67	27	8	14	2.46887	2.95217	3.49262	3.29272	1.30574	0.424409	0.698291
ENSMUSG00000055172	41.4917	36.9182	45.5695	52.0312	20.0805	5.24487	6.0723	1.16979	5.48583e-06	0.000115222	C1ra	6	124512405	124523443	+	2981	protein_coding	complement component 1, r subcomponent A [Source:MGI Symbol;Acc:MGI:1355313]	-	36	40	46	58	21	5	6	0.821009	0.771091	0.997496	1.07954	0.38463	0.100461	0.113342
ENSMUSG00000074577	21.8984	26.7657	35.6631	25.1185	4.78108	7.34281	5.06025	1.1666	7.51729e-06	0.000151025	Ripor3	2	167980164	168010618	-	4244	protein_coding	RIPOR family member 3 [Source:MGI Symbol;Acc:MGI:1916803]	-	19	29	36	28	5	7	5	0.586336	0.756469	1.05634	0.705208	0.12392	0.190315	0.127808
ENSMUSG00000021763	73.763	55.3773	41.6069	50.2371	15.2995	9.44076	23.2772	1.1666	2.16217e-06	5.00829e-05	BC067074	13	113293159	113379711	+	8586	protein_coding	cDNA sequence BC067074 [Source:MGI Symbol;Acc:MGI:3040697]	-	64	60	42	56	16	9	23	1.04591	0.828831	0.652636	0.74691	0.209997	0.12958	0.311341
ENSMUSG00000020627	2356.96	2096.95	2347.82	2323.46	926.573	995.475	1065.69	1.16068	2.07042e-39	1.86555e-36	Klhl29	12	5077472	5375682	-	7041	protein_coding	kelch-like 29 [Source:MGI Symbol;Acc:MGI:2683857]	-	2045	2272	2370	2590	969	949	1053	28.5009	26.7654	31.4067	29.4599	10.846	11.6523	12.156
ENSMUSG00000030309	1089.16	1095.55	1498.84	1189.54	453.246	528.682	566.748	1.15842	2.95313e-19	5.7846e-17	Caprin2	6	148842492	148896237	-	14140	protein_coding	caprin family member 2 [Source:MGI Symbol;Acc:MGI:2448541]	-	945	1187	1513	1326	474	504	560	32.1546	34.14	48.9507	36.8232	12.953	15.1086	15.7832
ENSMUSG00000021423	57.6273	69.2217	98.0735	61.0022	24.8616	22.0284	25.3013	1.15841	3.80198e-07	1.04127e-05	Ly86	13	37345208	37419036	+	3632	protein_coding	lymphocyte antigen 86 [Source:MGI Symbol;Acc:MGI:1321404]	-	50	75	99	68	26	21	25	1.78062	2.25768	3.35231	1.97641	0.743625	0.658873	0.737457
ENSMUSG00000057766	499.053	473.476	559.712	565.167	240.966	219.235	211.519	1.15814	7.55752e-22	1.97383e-19	Ankrd29	18	12252362	12305720	-	3295	protein_coding	ankyrin repeat domain 29 [Source:MGI Symbol;Acc:MGI:2687055]	-	433	513	565	630	252	209	209	16.5377	16.5617	20.5184	19.6379	7.72978	7.03258	6.61194
ENSMUSG00000026674	208.611	198.435	127.793	193.772	76.4973	52.4487	79.952	1.15742	1.93075e-09	8.34391e-08	Ddr2	1	169972307	170110762	-	9264	protein_coding	discoidin domain receptor family, member 2 [Source:MGI Symbol;Acc:MGI:1345277]	-	181	215	129	216	80	50	79	3.42475	3.43866	2.32085	3.33557	1.21568	0.833492	1.23815
ENSMUSG00000044716	153.289	120.907	192.184	157.888	53.5481	65.0363	63.7592	1.15518	5.86446e-10	2.79586e-08	Dok7	5	35056766	35087839	+	4275	protein_coding	docking protein 7 [Source:MGI Symbol;Acc:MGI:3584043]	-	133	131	194	176	56	62	63	4.25501	3.54258	5.90144	4.59544	1.43885	1.74752	1.66949
ENSMUSG00000022906	172.882	147.673	190.203	183.904	65.9789	52.4487	87.0363	1.15257	1.89546e-10	9.75946e-09	Parp9	16	35938470	35972605	+	4872	protein_coding	poly (ADP-ribose) polymerase family, member 9 [Source:MGI Symbol;Acc:MGI:1933117]	-	150	160	192	205	69	50	86	6.04124	5.44698	7.35265	6.73837	2.23184	1.77413	2.86899
ENSMUSG00000070498	1126.04	887.883	971.819	1293.6	428.385	380.777	539.423	1.1477	1.35481e-15	1.69548e-13	Tmem132b	5	125531774	125792583	+	8238	protein_coding	transmembrane protein 132B [Source:MGI Symbol;Acc:MGI:3609245]	-	977	962	981	1442	448	363	533	20.4245	16.9994	19.5	24.603	7.52166	6.68567	9.22952
ENSMUSG00000057729	29.9662	26.7657	59.4385	29.604	6.69351	11.5387	1.01205	1.14728	1.18659e-05	0.000224147	Prtn3	10	79874476	79883174	+	1732	protein_coding	proteinase 3 [Source:MGI Symbol;Acc:MGI:893580]	-	26	29	60	33	7	11	1	2.55432	2.40824	5.6048	2.64595	0.552304	0.952084	0.081376
ENSMUSG00000030905	1492.55	1757.31	2162.57	1704.47	852.945	768.897	661.881	1.14587	4.53229e-19	8.68897e-17	Crym	7	120186380	120202111	-	3391	protein_coding	crystallin, mu [Source:MGI Symbol;Acc:MGI:102675]	-	1295	1904	2183	1900	892	733	654	43.3265	53.8457	69.4457	51.8804	23.9678	21.6057	18.1241
ENSMUSG00000062488	250.103	225.201	344.743	254.774	114.746	119.583	94.1207	1.14301	9.81046e-12	6.42888e-10	Ifit3b	19	34607970	34613401	+	2000	protein_coding	interferon-induced protein with tetratricopeptide repeats 3B [Source:MGI Symbol;Acc:MGI:3698419]	-	217	244	348	284	120	114	93	7.37628	7.0108	11.2477	7.87883	3.27595	3.414	2.61852
ENSMUSG00000034739	180.95	178.13	37.6444	72.6643	30.5989	22.0284	34.4097	1.13504	1.10377e-05	0.000211381	Mfrp	9	44101729	44109187	+	4334	protein_coding	membrane frizzled-related protein [Source:MGI Symbol;Acc:MGI:2385957]	-	157	193	38	81	32	21	34	4.12742	4.28881	0.949884	1.73792	0.675628	0.486384	0.740377
ENSMUSG00000024397	17.2882	24.9198	27.738	29.604	7.64973	2.09795	0	1.13265	1.37716e-05	0.000255327	Aif1	17	35170991	35176068	-	1532	protein_coding	allograft inflammatory factor 1 [Source:MGI Symbol;Acc:MGI:1343098]	-	15	27	28	33	8	2	0	1.41634	2.15496	2.51386	2.54305	0.606658	0.166374	0
ENSMUSG00000034422	297.357	192.898	274.408	416.25	122.396	109.093	116.386	1.12871	4.40355e-09	1.78329e-07	Parp14	16	35832874	35871544	-	9306	protein_coding	poly (ADP-ribose) polymerase family, member 14 [Source:MGI Symbol;Acc:MGI:1919489]	-	258	209	277	464	128	104	115	4.37731	2.99733	4.46864	6.42498	1.74412	1.55454	1.61615
ENSMUSG00000069874	133.695	119.984	156.521	146.226	52.5919	54.5466	61.7351	1.12711	2.97574e-10	1.49793e-08	Irgm2	11	58199618	58222782	+	3690	protein_coding	immunity-related GTPase family M member 2 [Source:MGI Symbol;Acc:MGI:1926262]	-	116	130	158	163	55	52	61	2.26289	2.14362	2.93069	2.59513	0.86168	0.893695	0.985665
ENSMUSG00000030862	57.6273	49.8396	51.5133	41.2662	14.3432	18.8815	16.1928	1.1247	2.05579e-06	4.81761e-05	Cpxm2	7	132032687	132154739	-	4622	protein_coding	carboxypeptidase X 2 (M14 family) [Source:MGI Symbol;Acc:MGI:1926006]	-	50	54	52	46	15	18	16	2.36549	2.15946	2.33917	1.77613	0.569929	0.750247	0.626997
ENSMUSG00000047735	138.306	118.138	133.737	139.946	56.4167	43.0079	60.723	1.1226	6.70636e-10	3.14524e-08	Samd9l	6	3372257	3399572	-	5427	protein_coding	sterile alpha motif domain containing 9-like [Source:MGI Symbol;Acc:MGI:1343184]	-	120	128	135	156	59	41	60	2.83366	2.55491	3.03115	3.00647	1.11891	0.852964	1.17358
ENSMUSG00000030107	54.1697	49.8396	88.1671	81.6352	26.774	18.8815	23.2772	1.12126	1.79497e-06	4.23948e-05	Usp18	6	121245906	121270917	+	2790	protein_coding	ubiquitin specific peptidase 18 [Source:MGI Symbol;Acc:MGI:1344364]	-	47	54	89	91	28	18	23	3.61046	3.50638	6.50073	5.70521	1.72743	1.2182	1.46348
ENSMUSG00000040483	87.5936	101.525	149.587	104.062	45.8984	45.1058	34.4097	1.12038	8.34586e-08	2.71973e-06	Xaf1	11	72301629	72313733	+	4689	protein_coding	XIAP associated factor 1 [Source:MGI Symbol;Acc:MGI:3772572]	-	76	110	151	116	48	43	34	3.73593	4.57065	7.05781	4.65382	1.89498	1.86224	1.38439
ENSMUSG00000001131	24.2035	18.4591	65.3823	40.3691	3.82486	6.29384	10.1205	1.12033	1.89151e-05	0.000337494	Timp1	X	20870166	20874735	+	888	protein_coding	tissue inhibitor of metalloproteinase 1 [Source:MGI Symbol;Acc:MGI:98752]	-	21	20	66	45	4	6	10	1.66395	1.33952	4.97247	2.91004	0.254542	0.418844	0.656319
ENSMUSG00000086706	54.1697	59.0691	67.3636	76.2527	17.2119	14.6856	32.3856	1.12033	2.09651e-06	4.88129e-05	Gm15848	1	130809977	130824084	-	1066	antisense	predicted gene 15848 [Source:MGI Symbol;Acc:MGI:3802054]	-	47	64	68	85	18	14	32	5.50906	6.34103	7.57873	8.13138	1.69446	1.44573	3.10688
ENSMUSG00000033386	39.1866	52.6085	34.6724	34.9865	12.4308	13.6366	10.1205	1.11335	7.76461e-06	0.000155129	Frrs1	3	116859464	116908177	+	7260	protein_coding	ferric-chelate reductase 1 [Source:MGI Symbol;Acc:MGI:108076]	-	34	57	35	39	13	13	10	1.2374	1.7535	1.21117	1.15841	0.379973	0.416826	0.301457
ENSMUSG00000052336	198.238	168.901	222.894	175.83	89.8843	80.7709	68.8194	1.11139	3.54597e-11	2.04814e-09	Cx3cr1	9	119901616	120069879	-	4505	protein_coding	chemokine (C-X3-C motif) receptor 1 [Source:MGI Symbol;Acc:MGI:1333815]	-	172	183	225	196	94	77	68	3.07718	2.76742	3.82749	2.86184	1.35061	1.21366	1.00769
ENSMUSG00000032554	121.017	45.2248	165.437	120.21	35.38	19.9305	45.5423	1.10771	9.58578e-06	0.000187563	Trf	9	103204001	103230444	-	3320	protein_coding	transferrin [Source:MGI Symbol;Acc:MGI:98821]	-	105	49	167	134	37	19	45	6.63414	2.61693	10.0327	6.90981	1.87748	1.05762	2.35506
ENSMUSG00000092168	14.9831	8.3066	38.635	21.5302	0	1.04897	2.0241	1.1069	1.10578e-05	0.000211542	Gm9075	12	3082667	3087041	+	794	unprocessed_pseudogene	predicted gene 9075 [Source:MGI Symbol;Acc:MGI:3644696]	-	13	9	39	24	0	1	2	1.11309	0.651373	3.17511	1.67712	0	0.0754342	0.141844
ENSMUSG00000009418	4455.75	3423.24	4375.66	4294.37	1632.26	1743.39	2149.6	1.10436	1.03417e-20	2.38933e-18	Nav1	1	135434580	135607295	-	17303	protein_coding	neuron navigator 1 [Source:MGI Symbol;Acc:MGI:2183683]	-	3866	3709	4417	4787	1707	1662	2124	46.2153	37.4784	50.2064	46.704	16.3884	17.504	21.0317
ENSMUSG00000028480	48.407	35.9953	77.27	67.2818	17.2119	22.0284	15.1808	1.10018	7.27204e-06	0.00014626	Glipr2	4	43957401	43979118	+	2320	protein_coding	GLI pathogenesis-related 2 [Source:MGI Symbol;Acc:MGI:1917770]	-	42	39	78	75	18	21	15	1.38072	1.08373	2.43814	2.01226	0.475235	0.608215	0.408454
ENSMUSG00000039899	20.7458	17.5362	38.635	21.5302	4.78108	1.04897	6.0723	1.09986	2.59333e-05	0.000448506	Fgl2	5	21372642	21378374	+	3788	protein_coding	fibrinogen-like protein 2 [Source:MGI Symbol;Acc:MGI:103266]	-	18	19	39	24	5	1	6	0.32305	0.288238	0.665534	0.35154	0.0720686	0.0158117	0.0891956
ENSMUSG00000034957	92.2038	81.2201	121.849	104.062	35.38	33.5671	47.5664	1.09396	1.20612e-07	3.80089e-06	Cebpa	7	35119293	35121928	+	2636	protein_coding	CCAAT/enhancer binding protein (C/EBP), alpha [Source:MGI Symbol;Acc:MGI:99480]	C/EBP	80	88	123	116	37	32	47	2.27277	2.11324	3.3226	2.68961	0.8442	0.800932	1.10601
ENSMUSG00000026923	1338.11	1202.61	1338.36	1316.93	507.751	598.964	660.869	1.09196	7.35961e-25	2.76307e-22	Notch1	2	26457903	26516663	-	14232	protein_coding	notch 1 [Source:MGI Symbol;Acc:MGI:97363]	-	1161	1303	1351	1468	531	571	653	51.9615	49.2941	57.4927	53.6218	19.0864	22.5147	24.2079
ENSMUSG00000028195	58.7799	84.9119	89.1577	82.5323	34.4238	26.2243	29.3495	1.08543	4.99767e-07	1.33427e-05	Cyr61	3	145646976	145649981	-	2019	protein_coding	cysteine rich protein 61 [Source:MGI Symbol;Acc:MGI:88613]	-	51	92	90	92	36	25	29	1.71728	2.61854	2.88152	2.52828	0.973537	0.741638	0.808843
ENSMUSG00000079017	13.8306	15.6902	23.7754	17.9418	0.956216	4.19589	0	1.08428	2.40315e-05	0.000419642	Ifi27l2a	12	103442167	103443680	-	463	protein_coding	interferon, alpha-inducible protein 27 like 2A [Source:MGI Symbol;Acc:MGI:1924183]	-	12	17	24	20	1	4	0	1.76201	2.10997	3.35078	2.39675	0.117925	0.517449	0
ENSMUSG00000014599	180.95	195.667	224.876	192.874	87.9719	93.3586	77.9279	1.07955	7.22942e-12	4.87945e-10	Csf1	3	107741048	107760469	-	5281	protein_coding	colony stimulating factor 1 (macrophage) [Source:MGI Symbol;Acc:MGI:1339753]	-	157	212	227	215	92	89	77	5.36897	6.12812	7.38116	6.00061	2.52672	2.6814	2.18111
ENSMUSG00000037846	42.6442	63.6839	85.1951	80.7381	21.993	23.0774	27.3254	1.07515	4.36388e-06	9.44075e-05	Rtkn2	10	67979570	68059740	+	5547	protein_coding	rhotekin 2 [Source:MGI Symbol;Acc:MGI:2158417]	-	37	69	86	90	23	22	27	0.82771	1.30475	1.82929	1.64318	0.413222	0.433591	0.500306
ENSMUSG00000035208	24.2035	5.53773	43.5882	45.7516	1.91243	2.09795	4.0482	1.07503	2.49338e-05	0.000433299	Slfn8	11	83002158	83020810	-	4091	protein_coding	schlafen 8 [Source:MGI Symbol;Acc:MGI:2672859]	-	21	6	44	51	2	2	4	0.505906	0.122181	1.00789	1.00274	0.0386954	0.0424484	0.0798188
ENSMUSG00000023885	21.8984	31.3805	27.738	34.9865	7.64973	4.19589	10.1205	1.07469	3.44151e-05	0.000570032	Thbs2	17	14665500	14694235	-	7003	protein_coding	thrombospondin 2 [Source:MGI Symbol;Acc:MGI:98738]	-	19	34	28	39	8	4	10	0.326434	0.493766	0.457412	0.546855	0.110385	0.0605456	0.14231
ENSMUSG00000006764	170.577	150.442	182.278	168.653	79.3659	81.8199	52.6266	1.0738	1.04444e-09	4.70545e-08	Tph2	10	115078641	115185022	-	2879	protein_coding	tryptophan hydroxylase 2 [Source:MGI Symbol;Acc:MGI:2651811]	-	148	163	184	188	83	78	52	6.89626	6.42008	8.15226	7.14951	3.10606	3.20205	2.00701
ENSMUSG00000027995	35.729	18.4591	42.5976	24.2214	6.69351	5.24487	9.10845	1.07211	3.99867e-05	0.000645121	Tlr2	3	83836272	83841767	-	3014	protein_coding	toll-like receptor 2 [Source:MGI Symbol;Acc:MGI:1346060]	-	31	20	43	27	7	5	9	0.699239	0.381324	0.922233	0.497043	0.126806	0.0993609	0.168152
ENSMUSG00000029762	28.8137	24.9198	35.6631	37.6778	9.56216	5.24487	11.1326	1.06981	3.19576e-05	0.000535728	Akr1b8	6	34354119	34368463	+	1499	protein_coding	aldo-keto reductase family 1, member B8 [Source:MGI Symbol;Acc:MGI:107673]	-	25	27	36	42	10	5	11	1.54089	1.40668	2.10981	2.11275	0.495006	0.271508	0.56159
ENSMUSG00000030671	259.323	202.127	194.166	215.302	83.1908	100.701	101.205	1.06836	2.82116e-11	1.67237e-09	Pde3b	7	114415281	114539251	+	9114	protein_coding	phosphodiesterase 3B, cGMP-inhibited [Source:MGI Symbol;Acc:MGI:1333863]	-	225	219	196	240	87	96	100	5.86519	4.82552	4.85807	5.10596	1.82137	2.20471	2.15921
ENSMUSG00000029826	247.798	143.058	223.885	223.376	64.0665	82.8689	110.314	1.06711	5.58669e-08	1.87832e-06	Zc3hav1	6	38305286	38354603	-	6518	protein_coding	zinc finger CCCH type, antiviral 1 [Source:MGI Symbol;Acc:MGI:1926031]	-	215	155	226	249	67	79	109	3.96113	2.41387	3.95911	3.74409	0.991368	1.2823	1.66342
ENSMUSG00000114018	10.3729	7.38364	41.6069	20.6331	0	0	0	1.06647	1.13098e-05	0.000215448	Gm36495	12	16844881	16850881	-	684	lincRNA	predicted gene, 36495 [Source:MGI Symbol;Acc:MGI:5595654]	-	9	8	42	23	0	0	0	0.894528	0.672112	3.96925	1.86571	0	0	0
ENSMUSG00000025888	12.678	10.1525	21.7941	26.9127	2.86865	1.04897	1.01205	1.06002	3.34647e-05	0.000556335	Casp1	9	5298517	5307265	+	1497	protein_coding	caspase 1 [Source:MGI Symbol;Acc:MGI:96544]	-	11	11	22	30	3	1	1	0.499549	0.422259	0.949984	1.11192	0.109417	0.0400098	0.0376167
ENSMUSG00000026980	298.51	247.352	238.745	339.997	115.702	129.024	131.567	1.04769	2.65585e-11	1.57958e-09	Ly75	2	60292103	60383303	-	6905	protein_coding	lymphocyte antigen 75 [Source:MGI Symbol;Acc:MGI:106662]	-	259	268	241	379	121	123	130	2.91714	2.55149	2.58097	3.48388	1.09452	1.22052	1.21282
ENSMUSG00000026547	132.543	126.445	202.091	121.107	53.5481	51.3997	73.8797	1.04646	2.53948e-07	7.32224e-06	Tagln2	1	172500047	172507380	+	2082	protein_coding	transgelin 2 [Source:MGI Symbol;Acc:MGI:1312985]	-	115	137	204	135	56	49	73	8.29075	8.34866	13.9841	7.9432	3.24237	3.11224	4.35927
ENSMUSG00000019997	386.103	371.028	474.517	453.031	200.805	153.15	217.591	1.04644	7.19801e-13	5.81683e-11	Ctgf	10	24595442	24598683	+	2861	protein_coding	connective tissue growth factor [Source:MGI Symbol;Acc:MGI:95537]	-	335	402	479	505	210	146	215	13.0664	13.2537	17.7645	16.0756	6.57822	5.017	6.94614
ENSMUSG00000021806	62.2375	104.294	20.8035	42.1633	20.0805	11.5387	8.0964	1.04576	6.42254e-05	0.000966922	Nid2	14	19751265	19811787	+	5174	protein_coding	nidogen 2 [Source:MGI Symbol;Acc:MGI:1298229]	-	54	113	21	47	21	11	8	1.08775	1.92403	0.402217	0.772676	0.339728	0.195212	0.133481
ENSMUSG00000027962	418.375	362.721	467.583	435.986	210.367	148.954	212.531	1.04463	7.89512e-13	6.29548e-11	Vcam1	3	116109949	116129688	-	8870	protein_coding	vascular cell adhesion molecule 1 [Source:MGI Symbol;Acc:MGI:98926]	-	363	393	472	486	220	142	210	9.10972	8.33665	11.2629	9.95407	4.43404	3.13955	4.36529
ENSMUSG00000000290	44.9493	32.3034	31.7005	38.5749	7.64973	8.39178	17.2049	1.04221	4.14683e-05	0.000666637	Itgb2	10	77530252	77565708	+	3052	protein_coding	integrin beta 2 [Source:MGI Symbol;Acc:MGI:96611]	-	39	35	32	43	8	8	17	1.47463	1.11863	1.15047	1.32694	0.242933	0.266495	0.532429
ENSMUSG00000026589	23.0509	19.3821	57.4572	52.0312	13.387	5.24487	6.0723	1.04136	7.00894e-05	0.00103872	Sec16b	1	157506728	157568425	+	5410	protein_coding	SEC16 homolog B (S. cerevisiae) [Source:MGI Symbol;Acc:MGI:2148802]	-	20	21	58	58	14	5	6	0.414032	0.367472	1.14167	0.979937	0.232762	0.0911917	0.102885
ENSMUSG00000044786	109.492	107.986	148.596	110.342	52.5919	55.5956	42.5061	1.04065	6.98189e-08	2.32141e-06	Zfp36	7	28376784	28380253	-	3470	protein_coding	zinc finger protein 36 [Source:MGI Symbol;Acc:MGI:99180]	-	95	117	150	123	55	53	42	2.4585	2.55937	3.69102	2.59788	1.14311	1.20838	0.900309
ENSMUSG00000029771	29.9662	40.61	48.5414	43.0603	15.2995	14.6856	10.1205	1.03841	2.79802e-05	0.00048022	Irf5	6	29526625	29541871	+	2905	protein_coding	interferon regulatory factor 5 [Source:MGI Symbol;Acc:MGI:1350924]	IRF	26	44	49	48	16	14	10	1.4572	2.08449	2.61126	2.1956	0.720187	0.691283	0.464239
ENSMUSG00000043850	238.577	196.59	313.043	269.127	130.045	92.3096	112.338	1.03625	2.42188e-09	1.02693e-07	Clrn1	3	58844028	58885340	-	3857	protein_coding	clarin 1 [Source:MGI Symbol;Acc:MGI:2388124]	-	207	213	316	300	136	88	111	8.20088	7.13297	11.9038	9.70013	4.32721	3.07152	3.64257
ENSMUSG00000107385	38.034	46.1478	61.4198	43.0603	21.993	11.5387	14.1687	1.03601	2.42324e-05	0.000422333	C330024D21Rik	5	67463897	67477632	+	4070	processed_transcript	RIKEN cDNA C330024D21 gene [Source:MGI Symbol;Acc:MGI:2444116]	-	33	50	62	48	23	11	14	1.03577	1.32654	1.85033	1.22958	0.57977	0.304174	0.363975
ENSMUSG00000019982	111.797	113.524	175.343	148.917	57.373	57.6935	59.711	1.03549	8.23485e-08	2.68841e-06	Myb	10	21124935	21160984	-	8933	protein_coding	myeloblastosis oncogene [Source:MGI Symbol;Acc:MGI:97249]	MYB	97	123	177	166	60	55	59	2.68395	2.87679	4.65676	3.74866	1.33331	1.34074	1.35223
ENSMUSG00000029810	404.544	489.166	496.311	442.266	247.66	220.284	158.892	1.03356	2.38526e-12	1.79103e-10	Tmem176b	6	48833818	48841496	-	2371	protein_coding	transmembrane protein 176B [Source:MGI Symbol;Acc:MGI:1916348]	-	351	530	501	493	259	210	157	25.0656	31.9924	34.0186	28.7332	14.8542	13.2121	9.28678
ENSMUSG00000024778	16.1357	31.3805	37.6444	25.1185	7.64973	1.04897	8.0964	1.03248	8.05511e-05	0.00116724	Fas	19	34290659	34327770	+	1801	protein_coding	Fas (TNF receptor superfamily member 6) [Source:MGI Symbol;Acc:MGI:95484]	-	14	34	38	28	8	1	8	0.933115	1.91552	2.40823	1.52311	0.428229	0.0587203	0.441664
ENSMUSG00000026177	41.4917	43.3789	21.7941	26.9127	4.78108	8.39178	13.1567	1.03005	7.46856e-05	0.0010987	Slc11a1	1	74375195	74386062	+	3705	protein_coding	solute carrier family 11 (proton-coupled divalent metal ion transporters), member 1 [Source:MGI Symbol;Acc:MGI:1345275]	-	36	47	22	30	5	8	13	1.99953	2.2066	1.16187	1.35992	0.223036	0.391469	0.598087
ENSMUSG00000005917	27.6611	44.3019	8.91577	32.2953	7.64973	2.09795	3.03615	1.02899	7.27729e-05	0.00107577	Otx1	11	21994764	22002897	-	5422	protein_coding	orthodenticle homeobox 1 [Source:MGI Symbol;Acc:MGI:97450]	TF_Otx	24	48	9	36	8	2	3	0.554218	0.936939	0.197615	0.678482	0.148367	0.0406893	0.0573833
ENSMUSG00000030786	17.2882	23.9968	21.7941	20.6331	5.7373	0	5.06025	1.02885	8.05751e-05	0.00116724	Itgam	7	128062640	128118491	+	5024	protein_coding	integrin alpha M [Source:MGI Symbol;Acc:MGI:96607]	-	15	26	22	23	6	0	5	0.359071	0.526093	0.500749	0.449348	0.11535	0	0.0991412
ENSMUSG00000002831	58.7799	100.602	77.27	71.7672	24.8616	29.3712	36.4338	1.02837	3.83021e-06	8.43817e-05	Plin4	17	56100591	56109803	-	5777	protein_coding	perilipin 4 [Source:MGI Symbol;Acc:MGI:1929709]	-	51	109	78	80	26	28	36	0.602466	1.0884	0.876122	0.771291	0.246669	0.291408	0.352257
ENSMUSG00000026395	48.407	33.2264	47.5508	43.9574	16.2557	18.8815	8.0964	1.02247	3.82335e-05	0.000621286	Ptprc	1	138062861	138175708	-	18313	protein_coding	protein tyrosine phosphatase, receptor type, C [Source:MGI Symbol;Acc:MGI:97810]	-	42	36	48	49	17	18	8	0.982565	0.711893	1.06773	0.935565	0.319403	0.370993	0.155023
ENSMUSG00000022037	15553.6	12717.4	15492.6	17221.4	7242.38	6999.8	7649.08	1.02139	8.51371e-24	2.84121e-21	Clu	14	65968483	65981547	+	3437	protein_coding	clusterin [Source:MGI Symbol;Acc:MGI:88423]	-	13495	13779	15639	19197	7574	6673	7558	1033.16	891.687	1138.44	1199.48	465.692	450.087	479.288
ENSMUSG00000024079	243.187	214.126	216.95	231.449	106.14	98.6035	109.301	1.01827	1.86779e-12	1.43232e-10	Eif2ak2	17	78852564	78882573	-	5113	protein_coding	eukaryotic translation initiation factor 2-alpha kinase 2 [Source:MGI Symbol;Acc:MGI:1353449]	-	211	232	219	258	111	94	108	9.23079	8.57916	9.10979	9.21175	3.89994	3.62298	3.91359
ENSMUSG00000028583	1353.09	1037.4	1277.93	1302.58	563.211	587.425	628.483	1.01672	4.36937e-20	9.37385e-18	Pdpn	4	143267431	143299564	-	1817	protein_coding	podoplanin [Source:MGI Symbol;Acc:MGI:103098]	-	1174	1124	1290	1452	589	560	621	61.9188	50.1096	64.6922	62.501	24.9487	26.021	27.1295
ENSMUSG00000050335	47.2544	47.9937	49.5321	39.472	21.993	10.4897	16.1928	1.01537	2.80115e-05	0.000480299	Lgals3	14	47367751	47386160	+	1858	protein_coding	lectin, galactose binding, soluble 3 [Source:MGI Symbol;Acc:MGI:96778]	-	41	52	50	44	23	10	16	3.33814	3.5787	3.87078	2.92375	1.50393	0.717302	1.07904
ENSMUSG00000023191	865.563	1015.25	1255.14	1041.52	545.999	503.507	424.049	1.01412	1.52267e-14	1.62367e-12	P3h3	6	124841089	124857752	-	3930	protein_coding	prolyl 3-hydroxylase 3 [Source:MGI Symbol;Acc:MGI:1315208]	-	751	1100	1267	1161	571	480	419	37.4586	46.3772	60.0892	47.2618	22.8732	21.0928	17.3109
ENSMUSG00000024087	479.46	376.566	384.369	420.735	171.163	195.109	217.591	1.01305	8.72346e-14	8.40671e-12	Cyp1b1	17	79706953	79715041	-	5128	protein_coding	cytochrome P450, family 1, subfamily b, polypeptide 1 [Source:MGI Symbol;Acc:MGI:88590]	-	416	408	388	469	179	186	215	5.51509	4.57215	4.89102	5.07456	1.90586	2.17247	2.36098
ENSMUSG00000043079	274.306	221.509	289.267	266.436	116.658	93.3586	147.759	1.01245	6.30656e-10	2.9908e-08	Synpo	18	60593973	60660142	-	9533	protein_coding	synaptopodin [Source:MGI Symbol;Acc:MGI:1099446]	-	238	240	292	297	122	89	146	5.4811	4.672	6.39414	5.58231	2.25647	1.80577	2.78509
ENSMUSG00000028581	129.085	71.0676	123.83	169.55	55.4605	52.4487	39.47	1.00652	6.27672e-06	0.000130015	Laptm5	4	130913125	130936141	+	3788	protein_coding	lysosomal-associated protein transmembrane 5 [Source:MGI Symbol;Acc:MGI:108046]	-	112	77	125	189	58	50	39	10.59	6.15417	11.2382	14.585	4.40439	4.16514	3.05449
ENSMUSG00000048612	482.917	413.484	458.667	423.427	237.142	205.599	191.278	1.0053	8.71863e-16	1.13854e-13	Myof	19	37899036	38043577	-	12603	protein_coding	myoferlin [Source:MGI Symbol;Acc:MGI:1919192]	-	419	448	463	472	248	196	189	8.94359	8.08307	9.39695	8.22254	4.25137	3.68583	3.3416
ENSMUSG00000037280	19.5933	12.9214	17.8315	27.8098	3.82486	3.14692	4.0482	1.0034	0.000122394	0.00166842	Galnt6	15	100691813	100729376	-	3871	protein_coding	polypeptide N-acetylgalactosaminyltransferase 6 [Source:MGI Symbol;Acc:MGI:1891640]	-	17	14	18	31	4	3	4	0.335383	0.233464	0.337655	0.499137	0.0633769	0.0521428	0.0653653
ENSMUSG00000067212	167.119	193.821	295.211	263.745	109.009	100.701	96.1448	1.00283	5.45461e-08	1.84078e-06	H2-T23	17	36029773	36032855	-	2889	protein_coding	histocompatibility 2, T region locus 23 [Source:MGI Symbol;Acc:MGI:95957]	-	145	210	298	294	114	96	95	5.76811	7.06131	11.2717	9.54506	3.64208	3.36448	3.13029
ENSMUSG00000105504	104.882	47.9937	105.008	103.165	25.8178	39.861	37.4459	1.00123	1.83468e-05	0.000329419	Gbp5	3	142493978	142522344	+	6637	protein_coding	guanylate binding protein 5 [Source:MGI Symbol;Acc:MGI:2429943]	-	91	52	106	115	27	38	37	2.00147	0.966746	2.21678	2.0643	0.476926	0.736331	0.67407
ENSMUSG00000026896	157.899	156.902	233.791	194.669	72.6724	78.673	98.1689	0.998228	3.6121e-08	1.25907e-06	Ifih1	2	62595798	62646255	-	8165	protein_coding	interferon induced with helicase C domain 1 [Source:MGI Symbol;Acc:MGI:1918836]	-	137	170	236	217	76	75	97	3.10668	3.25856	5.08857	4.01607	1.3841	1.49837	1.82198
ENSMUSG00000093661	301.967	335.033	417.06	366.013	151.082	172.032	179.133	0.998037	2.88857e-12	2.09056e-10	Eif4e3	6	99625135	99666771	-	2515	protein_coding	eukaryotic translation initiation factor 4E member 3 [Source:MGI Symbol;Acc:MGI:1914142]	-	262	363	421	408	158	164	177	7.08224	8.29424	10.8208	9.0011	3.43009	3.90566	3.96312
ENSMUSG00000072620	18.4408	11.0755	22.7847	30.5011	1.91243	2.09795	6.0723	0.99635	0.000123406	0.00168095	Slfn2	11	83065112	83070678	+	1664	protein_coding	schlafen 2 [Source:MGI Symbol;Acc:MGI:1313258]	-	16	12	23	34	2	2	6	0.653693	0.414415	0.89349	1.1337	0.065624	0.0719888	0.203049
ENSMUSG00000039005	38.034	15.6902	40.6163	34.9865	11.4746	4.19589	9.10845	0.996241	0.000136982	0.00183399	Tlr4	4	66827584	66930284	+	5556	protein_coding	toll-like receptor 4 [Source:MGI Symbol;Acc:MGI:96824]	-	33	17	41	39	12	4	9	1.26536	0.550996	1.49483	1.22048	0.369538	0.135126	0.285849
ENSMUSG00000023992	41.4917	85.8349	63.401	71.7672	28.6865	19.9305	26.3133	0.995652	2.29594e-05	0.000403267	Trem2	17	48346401	48354147	+	4946	protein_coding	triggering receptor expressed on myeloid cells 2 [Source:MGI Symbol;Acc:MGI:1913150]	-	36	93	64	80	30	19	26	1.3137	2.86865	2.22066	2.3826	0.879214	0.610843	0.785892
ENSMUSG00000031844	38.034	58.1462	62.4104	22.4273	9.56216	19.9305	10.1205	0.995435	0.000118898	0.00162687	Hsd17b2	8	117701904	117759027	+	1924	protein_coding	hydroxysteroid (17-beta) dehydrogenase 2 [Source:MGI Symbol;Acc:MGI:1096386]	-	33	63	63	25	10	19	10	2.71279	4.37767	4.92437	1.67729	0.660208	1.37606	0.680921
ENSMUSG00000091144	101.424	106.14	148.596	106.754	49.7232	53.4976	48.5784	0.995411	2.91453e-07	8.27131e-06	Phf11c	14	59380833	59395381	-	3459	protein_coding	PHD finger protein 11C [Source:MGI Symbol;Acc:MGI:3648476]	-	88	115	150	119	52	51	48	1.72958	1.91054	2.80321	1.90884	0.820803	0.883097	0.781435
ENSMUSG00000018899	123.323	141.212	208.035	172.241	88.9281	60.8404	59.711	0.995148	5.00533e-07	1.33433e-05	Irf1	11	53770014	53778374	+	3976	protein_coding	interferon regulatory factor 1 [Source:MGI Symbol;Acc:MGI:96590]	IRF	107	153	210	192	93	58	59	6.46604	7.81532	12.0665	9.46939	4.51353	3.08791	2.95326
ENSMUSG00000025185	57.6273	66.4528	110.952	90.6061	33.4676	35.6651	28.3374	0.992178	1.13828e-05	0.00021661	Loxl4	19	42593982	42612813	-	4213	protein_coding	lysyl oxidase-like 4 [Source:MGI Symbol;Acc:MGI:1914823]	-	50	72	112	101	35	34	28	1.72199	2.09601	3.66764	2.83888	0.968071	1.03162	0.798754
ENSMUSG00000047361	88.7461	80.2971	105.008	105.857	43.9859	31.4692	46.5543	0.99188	1.08663e-06	2.73876e-05	Gm973	1	59516264	59636417	+	5484	protein_coding	predicted gene 973 [Source:MGI Symbol;Acc:MGI:2685819]	-	77	87	106	118	46	30	46	5.35253	5.11197	7.0062	6.69448	2.56806	1.83726	2.64863
ENSMUSG00000026072	296.205	190.129	306.108	266.436	124.308	119.583	120.434	0.991421	3.14348e-09	1.30828e-07	Il1r1	1	40225080	40317257	+	6363	protein_coding	interleukin 1 receptor, type I [Source:MGI Symbol;Acc:MGI:96545]	-	257	206	309	297	130	114	119	4.71195	3.19253	5.38684	4.44417	1.91421	1.84142	1.80721
ENSMUSG00000057143	174.035	154.134	155.531	189.286	82.2346	79.722	70.8435	0.991108	1.67418e-09	7.3052e-08	Trim12c	7	104338754	104353362	-	3740	protein_coding	tripartite motif-containing 12C [Source:MGI Symbol;Acc:MGI:4821183]	-	151	167	157	211	86	76	70	3.29871	3.08379	3.26118	3.76198	1.50885	1.46272	1.26666
ENSMUSG00000047237	43.7968	31.3805	37.6444	57.4138	15.2995	11.5387	17.2049	0.98958	6.82545e-05	0.00101607	Fbxw21	9	109139447	109162041	-	2448	protein_coding	F-box and WD-40 domain protein 21 [Source:MGI Symbol;Acc:MGI:2443323]	-	38	34	38	64	16	11	17	2.09521	1.58461	1.99221	2.87999	0.708506	0.534341	0.776405
ENSMUSG00000027718	10.3729	15.6902	19.8128	7.17672	0.956216	0	0	0.988962	5.08076e-05	0.000792044	Il21	3	37222759	37232636	-	5259	protein_coding	interleukin 21 [Source:MGI Symbol;Acc:MGI:1890474]	-	9	17	20	8	1	0	0	0.309331	0.49389	0.653611	0.224407	0.0276032	0	0
ENSMUSG00000022912	419.527	376.566	421.022	427.015	175.944	173.081	239.856	0.986572	6.75093e-13	5.50491e-11	Pros1	16	62854307	62929346	+	4088	protein_coding	protein S (alpha) [Source:MGI Symbol;Acc:MGI:1095733]	-	364	408	425	476	184	165	237	14.9796	14.1925	16.6301	15.9871	6.08127	5.98222	8.07868
ENSMUSG00000004609	35.729	29.5346	35.6631	51.1342	9.56216	15.7346	13.1567	0.983414	9.26875e-05	0.00131625	Cd33	7	43524216	43544428	-	7771	protein_coding	CD33 antigen [Source:MGI Symbol;Acc:MGI:99440]	-	31	32	36	57	10	15	13	0.95883	0.836624	1.05874	1.43887	0.248404	0.408745	0.333057
ENSMUSG00000008540	122.17	227.97	115.905	132.769	87.9719	46.1548	46.5543	0.978679	1.57866e-05	0.000287946	Mgst1	6	138140316	138156755	+	2013	protein_coding	microsomal glutathione S-transferase 1 [Source:MGI Symbol;Acc:MGI:1913850]	-	106	247	117	148	92	44	46	9.19173	18.1046	9.64684	10.4742	6.40705	3.36144	3.30403
ENSMUSG00000021557	8011.35	6997.85	9134.7	7798.41	3576.25	4058.48	4203.05	0.976865	9.65629e-22	2.44378e-19	Agtpbp1	13	59445742	59585227	-	21824	protein_coding	ATP/GTP binding protein 1 [Source:MGI Symbol;Acc:MGI:2159437]	-	6951	7582	9221	8693	3740	3869	4153	218.271	201.249	275.319	222.785	94.3192	107.036	108.021
ENSMUSG00000032596	121.017	110.755	148.596	114.828	75.5411	47.2038	36.4338	0.974604	2.83381e-06	6.39151e-05	Uba7	9	107975505	107984060	+	6692	protein_coding	ubiquitin-like modifier activating enzyme 7 [Source:MGI Symbol;Acc:MGI:1349462]	-	105	120	150	128	79	45	36	3.87321	3.74166	5.26116	3.85352	2.34039	1.46243	1.09997
ENSMUSG00000113580	85.2885	62.761	147.606	138.152	23.9054	63.9874	29.3495	0.969761	8.68821e-05	0.00124361	Gm48237	12	35546031	35548132	+	2102	lincRNA	predicted gene, 48237 [Source:MGI Symbol;Acc:MGI:6097646]	-	74	68	149	154	25	61	29	2.39335	1.85902	4.58215	4.06501	0.649372	1.73814	0.776905
ENSMUSG00000022893	684.613	586.077	681.561	610.919	349.975	289.517	305.639	0.969701	4.3654e-17	6.61083e-15	Adamts1	16	85793827	85803113	-	5302	protein_coding	a disintegrin-like and metallopeptidase (reprolysin type) with thrombospondin type 1 motif, 1 [Source:MGI Symbol;Acc:MGI:109249]	-	594	635	688	681	366	276	302	15.2215	13.7545	16.7636	14.2424	7.53234	6.23104	6.41021
ENSMUSG00000044468	99.119	64.6069	63.401	71.7672	33.4676	27.2733	32.3856	0.96843	1.0006e-05	0.00019515	Tent5c	3	100451628	100489324	-	6097	protein_coding	terminal nucleotidyltransferase 5C [Source:MGI Symbol;Acc:MGI:1921895]	-	86	70	64	80	35	26	32	2.63599	1.81361	1.86524	2.00125	0.861575	0.702102	0.812439
ENSMUSG00000036880	473.697	498.396	497.302	445.854	255.31	231.823	220.627	0.967925	4.66338e-17	7.00322e-15	Acaa2	18	74779197	74806207	+	1515	protein_coding	acetyl-Coenzyme A acyltransferase 2 (mitochondrial 3-oxoacyl-Coenzyme A thiolase) [Source:MGI Symbol;Acc:MGI:1098623]	-	411	540	502	497	267	221	218	18.4432	20.4828	21.4194	18.2019	9.62243	8.73712	8.10301
ENSMUSG00000096727	36.8815	60.9151	59.4385	65.4876	29.6427	16.7836	16.1928	0.967803	6.21643e-05	0.00093903	Psmb9	17	34181988	34187764	-	3659	protein_coding	proteasome (prosome, macropain) subunit, beta type 9 (large multifunctional peptidase 2) [Source:MGI Symbol;Acc:MGI:1346526]	-	32	66	60	73	31	16	16	1.96521	3.42613	3.50364	3.65888	1.52898	0.865687	0.813907
ENSMUSG00000073411	1477.57	1699.16	2032.8	1695.5	966.734	820.297	764.098	0.963934	1.29802e-15	1.65898e-13	H2-D1	17	35262730	35267499	+	2579	protein_coding	histocompatibility 2, D region locus 1 [Source:MGI Symbol;Acc:MGI:95896]	-	1282	1841	2052	1890	1011	782	755	96.5179	117.159	146.894	116.131	61.1293	51.869	47.0827
ENSMUSG00000056515	216.679	198.435	269.454	222.478	104.228	87.0648	128.53	0.96352	6.54948e-09	2.57741e-07	Rab31	17	65651729	65772752	-	3813	protein_coding	RAB31, member RAS oncogene family [Source:MGI Symbol;Acc:MGI:1914603]	-	188	215	272	248	109	83	127	6.34608	6.13461	8.73021	6.83228	2.95497	2.46835	3.55097
ENSMUSG00000021624	17.2882	21.228	26.7473	22.4273	6.69351	4.19589	6.0723	0.963473	0.000230889	0.0028499	Cd180	13	102693558	102739629	+	4509	protein_coding	CD180 antigen [Source:MGI Symbol;Acc:MGI:1194924]	-	15	23	27	25	7	4	6	0.819086	1.06161	1.40188	1.11415	0.306983	0.192433	0.271384
ENSMUSG00000022952	23.0509	23.9968	25.7567	30.5011	8.60594	5.24487	9.10845	0.961195	0.000209227	0.00262752	Runx1	16	92601466	92826149	-	12025	protein_coding	runt related transcription factor 1 [Source:MGI Symbol;Acc:MGI:99852]	Runt	20	26	26	34	9	5	9	0.476246	0.523329	0.588684	0.660764	0.172117	0.104894	0.177517
ENSMUSG00000031502	1003.87	1103.85	1360.15	999.359	516.357	568.543	568.772	0.960769	2.60974e-15	3.15638e-13	Col4a1	8	11198423	11312826	-	7464	protein_coding	collagen, type IV, alpha 1 [Source:MGI Symbol;Acc:MGI:88454]	-	871	1196	1373	1114	540	542	562	27.6572	32.1013	41.4543	28.8697	13.7709	15.1625	14.7816
ENSMUSG00000109561	34.5764	34.1494	65.3823	34.9865	19.1243	4.19589	14.1687	0.959582	0.000217083	0.0027073	Ankrd31	13	96748272	96910039	+	6208	protein_coding	ankyrin repeat domain 31 [Source:MGI Symbol;Acc:MGI:5006716]	-	30	37	66	39	20	4	14	0.526193	0.548562	1.10072	0.558283	0.28173	0.0618109	0.203398
ENSMUSG00000029468	17.2882	35.0723	25.7567	27.8098	11.4746	5.24487	4.0482	0.958015	0.000250527	0.00303614	P2rx7	5	122643911	122691432	+	5970	protein_coding	purinergic receptor P2X, ligand-gated ion channel, 7 [Source:MGI Symbol;Acc:MGI:1339957]	-	15	38	26	31	12	5	4	0.555426	1.18938	0.915411	0.936834	0.356858	0.163112	0.122684
ENSMUSG00000059182	231.662	200.281	255.585	205.434	109.009	126.926	79.952	0.955895	1.34385e-08	4.9933e-07	Skap2	6	51857422	52012549	-	11357	protein_coding	src family associated phosphoprotein 2 [Source:MGI Symbol;Acc:MGI:1889206]	-	201	217	258	229	114	121	79	6.33804	5.78387	7.73546	5.89332	2.88697	3.36144	2.06339
ENSMUSG00000075012	101.424	109.832	103.027	88.812	46.8546	48.2528	42.5061	0.955507	4.92911e-07	1.31792e-05	Fjx1	2	102449366	102452499	-	3134	protein_coding	four jointed box 1 [Source:MGI Symbol;Acc:MGI:1341907]	-	88	119	104	99	49	46	42	1.90893	2.18201	2.14511	1.75271	0.853657	0.879118	0.754662
ENSMUSG00000022324	109.492	103.371	51.5133	130.975	27.7303	32.5182	54.6507	0.954034	6.63209e-05	0.000991841	Matn2	15	34306677	34436273	+	6263	protein_coding	matrilin 2 [Source:MGI Symbol;Acc:MGI:109613]	-	95	112	52	146	29	31	54	2.26058	2.25276	1.17654	2.83541	0.55421	0.64989	1.06435
ENSMUSG00000042784	14.9831	36.9182	26.7473	46.6487	5.7373	2.09795	13.1567	0.952648	0.000270622	0.00324477	Muc1	3	89229057	89233381	+	2346	protein_coding	mucin 1, transmembrane [Source:MGI Symbol;Acc:MGI:97231]	-	13	40	27	52	6	2	13	0.824434	2.14424	1.62811	2.69142	0.305593	0.111744	0.68289
ENSMUSG00000031273	130.238	182.745	131.755	102.268	44.9421	59.7915	75.9038	0.951477	4.45074e-06	9.59412e-05	Col4a6	X	141165403	141474076	-	7973	protein_coding	collagen, type IV, alpha 6 [Source:MGI Symbol;Acc:MGI:2152695]	-	113	198	133	114	47	57	75	2.1775	3.22511	2.4369	1.79287	0.72737	0.967687	1.19711
ENSMUSG00000037206	100.272	138.443	33.6818	48.4429	25.8178	29.3712	23.2772	0.944262	0.000235606	0.0028903	Islr	9	58156268	58204306	-	2686	protein_coding	immunoglobulin superfamily containing leucine-rich repeat [Source:MGI Symbol;Acc:MGI:1349645]	-	87	150	34	54	27	28	23	3.47919	5.07049	1.29284	1.76246	0.867164	0.986501	0.761871
ENSMUSG00000042417	20.7458	24.9198	39.6256	24.2214	11.4746	2.09795	0	0.943847	0.00025422	0.00307676	Ccno	13	112987802	112990777	+	2555	protein_coding	cyclin O [Source:MGI Symbol;Acc:MGI:2145534]	-	18	27	40	27	12	2	0	0.76339	0.967917	1.61303	0.934553	0.408728	0.0747283	0
ENSMUSG00000003545	97.9665	130.137	180.297	130.975	62.154	55.5956	65.7833	0.941186	2.08989e-06	4.87641e-05	Fosb	7	19302696	19310051	-	6243	protein_coding	FBJ osteosarcoma oncogene B [Source:MGI Symbol;Acc:MGI:95575]	TF_bZIP	85	141	182	146	65	53	65	1.76771	2.47863	3.59892	2.47806	1.08564	0.971068	1.1197
ENSMUSG00000016206	32.2713	43.3789	40.6163	43.0603	19.1243	13.6366	12.1446	0.938901	0.000128579	0.0017422	H2-M3	17	37270220	37274484	+	1438	protein_coding	histocompatibility 2, M region locus 3 [Source:MGI Symbol;Acc:MGI:95915]	-	28	47	41	48	20	13	12	1.32375	1.87822	1.84306	1.85206	0.759377	0.541468	0.469921
ENSMUSG00000049112	32.2713	19.3821	29.7192	67.2818	7.64973	10.4897	13.1567	0.937833	0.000332391	0.00386754	Oxtr	6	112473683	112489943	-	4790	protein_coding	oxytocin receptor [Source:MGI Symbol;Acc:MGI:109147]	-	28	21	30	75	8	10	13	0.451936	0.286509	0.460414	0.987976	0.103702	0.1422	0.173803
ENSMUSG00000074457	630.443	837.121	990.641	762.527	443.684	373.434	375.471	0.937525	3.39224e-11	1.96564e-09	S100a16	3	90537254	90543151	+	1617	protein_coding	S100 calcium binding protein A16 [Source:MGI Symbol;Acc:MGI:1915110]	-	547	907	1000	850	464	356	371	47.4328	66.4812	82.4516	60.1556	32.3138	27.1971	26.6477
ENSMUSG00000021701	842.512	780.82	1020.36	914.135	422.647	383.924	526.266	0.935581	5.17317e-13	4.31601e-11	Plk2	13	110395046	110400844	+	4491	protein_coding	polo like kinase 2 [Source:MGI Symbol;Acc:MGI:1099790]	-	731	846	1030	1019	442	366	520	31.2556	30.576	41.8751	35.5591	15.1779	13.7871	18.4166
ENSMUSG00000078234	33.4239	90.4496	6.93449	60.1051	12.4308	7.34281	5.06025	0.931599	0.000302628	0.00357497	Klhdc7a	4	139960220	139968026	-	7807	protein_coding	kelch domain containing 7A [Source:MGI Symbol;Acc:MGI:2444612]	-	29	98	7	67	13	7	5	0.252535	0.721356	0.0579601	0.476172	0.0909171	0.0537035	0.0360652
ENSMUSG00000039911	39.1866	36.9182	53.4946	34.9865	11.4746	16.7836	18.2169	0.930129	0.000159026	0.00208727	Spsb1	4	149896283	149955043	-	4396	protein_coding	splA/ryanodine receptor domain and SOCS box containing 1 [Source:MGI Symbol;Acc:MGI:1921896]	-	34	40	54	39	12	16	18	2.56829	2.55403	3.87852	2.40434	0.727989	1.0648	1.12624
ENSMUSG00000030560	281.221	271.349	284.314	350.762	166.382	124.828	147.759	0.928779	4.91317e-10	2.37373e-08	Ctsc	7	88278085	88310888	+	5808	protein_coding	cathepsin C [Source:MGI Symbol;Acc:MGI:109553]	-	244	294	287	391	174	119	146	10.5724	10.7679	11.8243	13.827	6.05498	4.54268	5.24001
ENSMUSG00000060519	195.933	146.75	211.997	155.197	83.1908	69.2322	99.1809	0.927515	2.87801e-07	8.20644e-06	Tor3a	1	156653617	156674356	-	3892	protein_coding	torsin family 3, member A [Source:MGI Symbol;Acc:MGI:1353652]	-	170	159	214	173	87	66	98	6.20027	4.90184	7.42135	5.1496	2.54835	2.12074	2.96062
ENSMUSG00000004891	227.052	173.516	197.138	234.141	96.5778	112.24	95.1327	0.927291	8.10768e-09	3.13537e-07	Nes	3	87971078	87980451	+	6416	protein_coding	nestin [Source:MGI Symbol;Acc:MGI:101784]	-	197	188	199	261	101	107	94	2.99952	2.4196	2.88102	3.24334	1.23505	1.43533	1.18552
ENSMUSG00000037638	34.5764	49.8396	52.504	48.4429	18.1681	22.0284	15.1808	0.927267	0.000106234	0.00148062	Zbtb42	12	112678828	112682747	+	3490	protein_coding	zinc finger and BTB domain containing 42 [Source:MGI Symbol;Acc:MGI:3644133]	ZBTB	30	54	53	54	19	21	15	0.859108	1.30714	1.44315	1.26208	0.436978	0.529819	0.355806
ENSMUSG00000022148	26.5086	8.3066	16.8409	25.1185	2.86865	2.09795	5.06025	0.924048	0.000347627	0.00401061	Fyb	15	6522853	6663313	+	5384	protein_coding	FYN binding protein [Source:MGI Symbol;Acc:MGI:1346327]	-	23	9	17	28	3	2	5	1.75492	0.580461	1.23335	1.74363	0.183836	0.134444	0.316006
ENSMUSG00000006345	46.1019	38.7641	42.5976	47.5458	10.5184	15.7346	24.2892	0.92041	0.000170992	0.00222006	Ggt1	10	75561604	75586200	+	3411	protein_coding	gamma-glutamyltransferase 1 [Source:MGI Symbol;Acc:MGI:95706]	-	40	42	43	53	11	15	24	3.1293	2.77739	3.19863	3.38399	0.691129	1.03386	1.55523
ENSMUSG00000046768	338.849	296.269	276.389	294.246	152.995	106.995	182.169	0.919251	1.29456e-08	4.83009e-07	Rhoj	12	75308322	75401456	+	6484	protein_coding	ras homolog family member J [Source:MGI Symbol;Acc:MGI:1931551]	-	294	321	279	328	160	102	180	9.29211	8.57576	8.38454	8.46071	4.06131	2.8402	4.71232
ENSMUSG00000039116	96.8139	69.2217	97.0828	102.268	34.4238	20.9795	58.6989	0.919013	7.18022e-05	0.00106323	Adgrg6	10	14402583	14545659	-	12228	protein_coding	adhesion G protein-coupled receptor G6 [Source:MGI Symbol;Acc:MGI:1916151]	-	84	75	98	114	36	20	58	1.39319	1.05146	1.54548	1.54312	0.479525	0.292241	0.796806
ENSMUSG00000021876	119.865	94.1415	125.811	99.577	60.2416	49.3017	43.5182	0.918447	2.17411e-06	5.02949e-05	Rnase4	14	51091077	51106151	+	1637	protein_coding	ribonuclease, RNase A family 4 [Source:MGI Symbol;Acc:MGI:1926217]	-	104	102	127	111	63	47	43	4.74839	3.93653	5.51346	4.1362	2.31011	1.89057	1.62621
ENSMUSG00000036908	64.5426	73.8364	92.1296	106.754	47.8108	37.763	21.2531	0.917525	6.16817e-05	0.000933305	Unc93b1	19	3935186	3949340	+	2841	protein_coding	unc-93 homolog B1, TLR signaling regulator [Source:MGI Symbol;Acc:MGI:1859307]	-	56	80	93	119	50	36	21	2.28244	2.75614	3.60414	3.95844	1.63667	1.29269	0.708966
ENSMUSG00000107479	19.5933	10.1525	24.766	9.868	2.86865	2.09795	2.0241	0.91625	0.000335634	0.0038972	2610300M13Rik	6	66451949	66465738	-	2077	lincRNA	RIKEN cDNA 2610300M13 gene [Source:MGI Symbol;Acc:MGI:1919734]	-	17	11	25	11	3	2	2	1.02006	0.557918	1.42635	0.538687	0.14457	0.105728	0.0994037
ENSMUSG00000021464	39.1866	43.3789	42.5976	72.6643	21.993	18.8815	17.2049	0.91513	0.000172616	0.0022299	Ror2	13	53109312	53286124	-	4242	protein_coding	receptor tyrosine kinase-like orphan receptor 2 [Source:MGI Symbol;Acc:MGI:1347521]	-	34	47	43	81	23	18	17	0.862807	1.00817	1.03755	1.67759	0.46875	0.402428	0.357337
ENSMUSG00000030737	112.95	111.678	145.624	171.344	67.8913	59.7915	63.7592	0.914285	1.62076e-06	3.87885e-05	Slco2b1	7	99657804	99711340	-	5958	protein_coding	solute carrier organic anion transporter family, member 2b1 [Source:MGI Symbol;Acc:MGI:1351872]	-	98	121	147	191	71	57	63	3.61893	3.77693	5.16153	5.75643	2.10567	1.85443	1.92703
ENSMUSG00000027335	162.509	151.365	185.25	191.08	73.6286	92.3096	88.0484	0.91313	3.44992e-08	1.20955e-06	Adra1d	2	131545850	131562283	-	1899	protein_coding	adrenergic receptor, alpha 1d [Source:MGI Symbol;Acc:MGI:106673]	-	141	164	187	213	77	88	87	5.04779	4.9628	6.36549	6.22341	2.21387	2.77553	2.57986
ENSMUSG00000085204	40.3391	47.0707	47.5508	23.3244	14.3432	17.8325	10.1205	0.91213	0.000317915	0.00373234	Gm15327	13	111809141	111811039	+	752	processed_transcript	predicted gene 15327 [Source:MGI Symbol;Acc:MGI:3705295]	-	35	51	48	26	15	17	10	5.8463	7.20085	7.62364	3.54448	2.01226	2.50175	1.38359
ENSMUSG00000046618	210.916	240.891	76.2794	244.009	99.4464	52.4487	82.9881	0.911367	0.000133198	0.00179399	Olfml2a	2	38931978	38963753	+	5579	protein_coding	olfactomedin-like 2A [Source:MGI Symbol;Acc:MGI:2444741]	-	183	261	77	272	104	50	82	2.22999	2.68839	0.892174	2.70512	1.0178	0.536787	0.827675
ENSMUSG00000052776	21.8984	8.3066	21.7941	25.1185	5.7373	2.09795	3.03615	0.909997	0.000442437	0.00490052	Oas1a	5	120896256	120907521	-	1885	protein_coding	2'-5' oligoadenylate synthetase 1A [Source:MGI Symbol;Acc:MGI:2180860]	-	19	9	22	28	6	2	3	0.685251	0.274372	0.754443	0.824176	0.173791	0.0635488	0.0896215
ENSMUSG00000006411	124.475	158.748	246.67	158.785	78.4097	76.575	86.0243	0.909144	4.32179e-06	9.38349e-05	Nectin4	1	171370099	171388598	+	3746	protein_coding	nectin cell adhesion molecule 4 [Source:MGI Symbol;Acc:MGI:1918990]	-	108	172	249	177	82	73	85	2.1852	2.94169	4.79044	2.92286	1.33248	1.30128	1.42456
ENSMUSG00000030088	421.832	296.269	400.219	405.485	193.156	161.542	215.567	0.90899	1.75143e-09	7.60542e-08	Aldh1l1	6	90486427	90600203	+	4516	protein_coding	aldehyde dehydrogenase 1 family, member L1 [Source:MGI Symbol;Acc:MGI:1340024]	-	366	321	404	452	202	154	213	14.1296	10.475	14.8299	14.2414	6.26294	5.23781	6.81118
ENSMUSG00000085873	94.5088	117.215	94.1109	89.709	49.7232	56.6445	27.3254	0.908706	1.86859e-05	0.000334066	Ttc39aos1	4	109403794	109406155	-	858	antisense	Ttc39a opposite strand RNA 1 [Source:MGI Symbol;Acc:MGI:3651956]	-	82	127	95	100	52	54	27	9.88421	12.9399	10.8883	9.83772	5.03397	5.7346	2.6958
ENSMUSG00000035385	13.8306	16.6132	15.8503	8.9709	2.86865	0	2.0241	0.907433	0.000323259	0.00379014	Ccl2	11	82035571	82037453	+	1138	protein_coding	chemokine (C-C motif) ligand 2 [Source:MGI Symbol;Acc:MGI:98259]	-	12	18	16	10	3	0	2	0.855146	1.08426	1.08414	0.581601	0.171696	0	0.118055
ENSMUSG00000040296	210.916	196.59	253.604	250.288	119.527	99.6524	121.446	0.905292	6.26118e-09	2.4853e-07	Ddx58	4	40203773	40239828	-	7050	protein_coding	DEAD (Asp-Glu-Ala-Asp) box polypeptide 58 [Source:MGI Symbol;Acc:MGI:2442858]	-	183	213	256	279	125	95	120	7.70346	7.57905	10.2467	9.58529	4.22594	3.52322	4.18419
ENSMUSG00000091549	65.6952	57.2232	85.1951	81.6352	27.7303	37.763	31.3736	0.903288	3.46546e-05	0.000573471	Gm6548	17	78850792	78851956	-	1165	processed_pseudogene	predicted gene 6548 [Source:MGI Symbol;Acc:MGI:3644071]	-	57	62	86	91	29	36	31	3.32626	3.05825	4.77186	4.334	1.35912	1.85082	1.49844
ENSMUSG00000034248	1460.28	1631.79	2035.77	1496.35	835.733	885.333	842.026	0.903218	2.56446e-14	2.68686e-12	Slc25a37	14	69241848	69285112	-	6021	protein_coding	solute carrier family 25, member 37 [Source:MGI Symbol;Acc:MGI:1914962]	-	1267	1768	2055	1668	874	844	832	27.2323	32.1211	41.9979	29.2597	15.0869	15.982	14.8124
ENSMUSG00000030342	805.63	1084.47	1256.13	841.471	633.015	472.038	365.35	0.901629	1.03971e-07	3.31623e-06	Cd9	6	125460266	125494791	-	2044	protein_coding	CD9 antigen [Source:MGI Symbol;Acc:MGI:88348]	-	699	1175	1268	938	662	450	361	48.8898	69.4672	84.3273	53.5439	37.1859	27.729	20.9143
ENSMUSG00000021998	55.3223	59.9921	35.6631	72.6643	28.6865	18.8815	20.241	0.901379	0.000177674	0.00228704	Lcp1	14	75131101	75230842	+	9504	protein_coding	lymphocyte cytosolic protein 1 [Source:MGI Symbol;Acc:MGI:104808]	-	48	65	36	81	30	18	20	1.98494	2.27206	1.41552	2.73374	0.996336	0.655782	0.685063
ENSMUSG00000036949	39.1866	80.2971	40.6163	36.7807	21.993	14.6856	18.2169	0.900505	0.000336013	0.0038991	Slc39a12	2	14388316	14494977	+	2998	protein_coding	solute carrier family 39 (zinc transporter), member 12 [Source:MGI Symbol;Acc:MGI:2139274]	-	34	87	41	41	23	14	18	1.18354	2.55991	1.35705	1.16481	0.643001	0.429353	0.519006
ENSMUSG00000041673	8.06783	9.22955	12.8783	19.736	0	0	2.0241	0.896804	0.000224347	0.00278249	Lrrc18	14	32991382	33015291	+	3135	protein_coding	leucine rich repeat containing 18 [Source:MGI Symbol;Acc:MGI:1914830]	-	7	10	13	22	0	0	2	0.41274	0.498401	0.728835	1.05869	0	0	0.0976794
ENSMUSG00000052142	13.8306	23.0739	20.8035	9.868	3.82486	4.19589	1.01205	0.894399	0.000516653	0.00558524	Rasal3	17	32390659	32403583	-	4897	protein_coding	RAS protein activator like 3 [Source:MGI Symbol;Acc:MGI:2444128]	-	12	25	21	11	4	4	1	0.38664	0.680872	0.643357	0.289257	0.103506	0.113544	0.0266882
ENSMUSG00000029798	88.7461	71.9905	127.793	72.6643	48.767	33.5671	37.4459	0.894223	5.41523e-05	0.000832661	Herc6	6	57581000	57664632	+	9292	protein_coding	hect domain and RLD 6 [Source:MGI Symbol;Acc:MGI:1914388]	-	77	78	129	81	51	32	37	2.63451	2.25582	4.19669	2.26183	1.40139	0.964585	1.04859
ENSMUSG00000056737	39.1866	49.8396	71.3262	42.1633	19.1243	25.1754	17.2049	0.894092	0.000217883	0.00271352	Capg	6	72544391	72562983	+	2529	protein_coding	capping protein (actin filament), gelsolin-like [Source:MGI Symbol;Acc:MGI:1098259]	-	34	54	72	47	20	24	17	2.91116	3.90824	5.86175	3.28436	1.37529	1.81042	1.20568
ENSMUSG00000021186	69.1528	133.829	66.373	104.96	29.6427	41.9589	49.5905	0.891555	0.000110888	0.0015348	Fbln5	12	101746565	101819055	-	6911	protein_coding	fibulin 5 [Source:MGI Symbol;Acc:MGI:1346091]	-	60	145	67	117	31	40	49	1.22457	2.5015	1.30022	1.94888	0.508128	0.71924	0.828369
ENSMUSG00000051159	80.6783	103.371	145.624	88.812	60.2416	36.7141	44.5302	0.88963	4.27443e-05	0.000682281	Cited1	X	102247381	102252181	-	1754	protein_coding	Cbp/p300-interacting transactivator with Glu/Asp-rich carboxy-terminal domain 1 [Source:MGI Symbol;Acc:MGI:108023]	-	70	112	147	99	63	35	44	6.83748	9.24734	13.6529	7.89222	4.94217	3.01195	3.55997
ENSMUSG00000052160	29.9662	38.7641	62.4104	56.5167	16.2557	19.9305	19.229	0.889257	0.000313188	0.00368405	Pld4	12	112760655	112768990	+	3462	protein_coding	phospholipase D family, member 4 [Source:MGI Symbol;Acc:MGI:2144765]	-	26	42	63	63	17	19	19	1.48537	2.0282	3.42223	2.93743	0.779989	0.956302	0.899102
ENSMUSG00000022098	429.9	406.1	536.927	445.854	245.747	232.872	227.711	0.887653	5.29682e-12	3.64328e-10	Bmp1	14	70474558	70520234	-	8870	protein_coding	bone morphogenetic protein 1 [Source:MGI Symbol;Acc:MGI:88176]	-	373	440	542	497	257	222	225	8.63695	8.61201	11.9332	9.39234	4.77929	4.52882	4.31548
ENSMUSG00000029658	34.5764	67.3757	54.4853	53.8254	13.387	31.4692	17.2049	0.887116	0.000338101	0.00391828	Wdr95	5	149528679	149611894	+	3477	protein_coding	WD40 repeat domain 95 [Source:MGI Symbol;Acc:MGI:1923042]	-	30	73	55	60	14	30	17	1.50518	3.09593	2.62385	2.45689	0.564125	1.32608	0.7065
ENSMUSG00000062432	34.5764	29.5346	34.6724	56.5167	15.2995	15.7346	13.1567	0.885745	0.000414703	0.00466211	Cyp26c1	19	37685581	37693398	+	1747	protein_coding	cytochrome P450, family 26, subfamily c, polypeptide 1 [Source:MGI Symbol;Acc:MGI:2679699]	-	30	32	35	63	16	15	13	1.16744	1.0526	1.29506	2.00088	0.50005	0.514265	0.419037
ENSMUSG00000106734	34.5764	62.761	67.3636	52.9283	17.2119	32.5182	15.1808	0.88459	0.000330199	0.00384974	Gm20559	6	3333194	3346128	-	4690	processed_transcript	predicted gene, 20559 [Source:MGI Symbol;Acc:MGI:5295666]	-	30	68	68	59	18	31	15	1.87975	3.60153	4.0513	3.01714	0.905793	1.71128	0.778509
ENSMUSG00000047250	31.1188	35.9953	37.6444	17.0447	14.3432	3.14692	9.10845	0.883289	0.00073576	0.00743642	Ptgs1	2	36230426	36252272	+	3884	protein_coding	prostaglandin-endoperoxide synthase 1 [Source:MGI Symbol;Acc:MGI:97797]	-	27	39	38	19	15	3	9	1.21722	1.48618	1.62891	0.699078	0.543096	0.119154	0.336081
ENSMUSG00000004665	66.8477	94.1415	86.1858	97.7829	38.2486	46.1548	37.4459	0.882816	1.69346e-05	0.00030702	Cnn2	10	79988584	79996062	+	2460	protein_coding	calponin 2 [Source:MGI Symbol;Acc:MGI:105093]	-	58	102	87	109	40	44	37	2.32905	3.46219	3.32183	3.57226	1.29	1.55663	1.23069
ENSMUSG00000040747	19.5933	31.3805	31.7005	26.9127	12.4308	9.44076	5.06025	0.882071	0.000677432	0.00698398	Cd53	3	106759921	106790149	-	1742	protein_coding	CD53 antigen [Source:MGI Symbol;Acc:MGI:88341]	-	17	34	32	30	13	9	5	0.66345	1.1216	1.18745	0.955535	0.407457	0.309445	0.161631
ENSMUSG00000032648	2608.21	2208.63	2422.12	2689.48	1305.23	1254.57	1396.63	0.881634	7.21213e-21	1.71013e-18	Pygm	19	6384399	6398459	+	3218	protein_coding	muscle glycogen phosphorylase [Source:MGI Symbol;Acc:MGI:97830]	-	2263	2393	2445	2998	1365	1196	1380	92.9034	83.0406	95.4408	100.449	45.0048	43.2573	46.9268
ENSMUSG00000117220	176.34	215.049	186.241	183.904	95.6216	112.24	80.964	0.88055	4.88542e-08	1.65179e-06	CT025671.1	17	66231949	66236369	-	1152	lincRNA	novel transcript	-	153	233	188	205	100	107	80	12.5019	16.0931	14.6066	13.6711	6.5624	7.70281	5.41463
ENSMUSG00000004730	39.1866	25.8428	23.7754	28.7069	11.4746	9.44076	10.1205	0.880447	0.000588031	0.00621155	Adgre1	17	57358691	57483527	+	3238	protein_coding	adhesion G protein-coupled receptor E1 [Source:MGI Symbol;Acc:MGI:106912]	-	34	28	24	32	12	9	10	1.44106	1.00314	0.967213	1.10693	0.408473	0.336068	0.351073
ENSMUSG00000059336	398.781	341.494	459.657	385.749	233.317	210.844	165.976	0.879699	1.61206e-09	7.08558e-08	Slc14a1	18	78100091	78142119	-	3995	protein_coding	solute carrier family 14 (urea transporter), member 1 [Source:MGI Symbol;Acc:MGI:1351654]	-	346	370	464	430	244	201	164	8.89993	8.04475	11.3484	9.02703	5.04056	4.55499	3.49421
ENSMUSG00000029843	102.577	110.755	30.7099	126.49	32.5113	24.1264	46.5543	0.878059	0.000536028	0.00576358	Slc13a4	6	35267957	35308131	-	4528	protein_coding	solute carrier family 13 (sodium/sulfate symporters), member 4 [Source:MGI Symbol;Acc:MGI:2442367]	-	89	120	31	141	34	23	46	2.88123	3.28375	0.95424	3.7254	0.883987	0.65599	1.2335
ENSMUSG00000027907	34.5764	59.9921	73.3074	49.34	28.6865	22.0284	15.1808	0.876498	0.000337827	0.00391762	S100a11	3	93520488	93526287	+	511	protein_coding	S100 calcium binding protein A11 [Source:MGI Symbol;Acc:MGI:1338798]	-	30	65	74	55	30	21	15	3.99124	7.30971	9.36108	5.97194	3.20543	2.46143	1.653
ENSMUSG00000061536	3744.62	3339.25	3829.82	3842.24	1716.41	1864.03	2294.32	0.873717	3.38526e-16	4.5869e-14	Sec22c	9	121680045	121705490	-	6119	protein_coding	SEC22 homolog C, vesicle trafficking protein [Source:MGI Symbol;Acc:MGI:2447871]	-	3249	3618	3866	4283	1795	1777	2267	138.31	130.188	156.485	148.805	61.3686	66.6455	79.9372
ENSMUSG00000032690	20.7458	22.1509	19.8128	23.3244	7.64973	7.34281	5.06025	0.872661	0.000828799	0.00817503	Oas2	5	120730333	120749853	-	4451	protein_coding	2'-5' oligoadenylate synthetase 2 [Source:MGI Symbol;Acc:MGI:2180852]	-	18	24	20	26	8	7	5	0.443857	0.500245	0.468931	0.523251	0.158431	0.152072	0.102126
ENSMUSG00000101429	668.477	669.143	698.402	773.292	349.975	415.393	355.23	0.86967	3.71225e-15	4.37245e-13	BC055402	1	57200645	57214993	-	3301	lincRNA	cDNA sequence BC055402 [Source:MGI Symbol;Acc:MGI:3039597]	-	580	725	705	862	366	396	351	11.9451	12.6212	13.8057	14.4889	6.05371	7.18519	5.98775
ENSMUSG00000074277	28.8137	26.7657	23.7754	30.5011	7.64973	8.39178	13.1567	0.868676	0.000724789	0.00736269	Phldb3	7	24610763	24629297	+	3001	protein_coding	pleckstrin homology like domain, family B, member 3 [Source:MGI Symbol;Acc:MGI:3642959]	-	25	29	24	34	8	8	13	1.08393	1.06282	0.98942	1.20311	0.278567	0.305585	0.466874
ENSMUSG00000038776	220.136	241.814	186.241	209.919	131.002	92.3096	104.241	0.867683	8.03147e-08	2.64115e-06	Ephx1	1	180976210	181020904	-	1950	protein_coding	epoxide hydrolase 1, microsomal [Source:MGI Symbol;Acc:MGI:95405]	-	191	262	188	234	137	88	103	11.0135	12.7701	10.3076	11.0122	6.34444	4.47051	4.91955
ENSMUSG00000032060	578.579	673.757	675.617	1284.63	401.611	389.169	393.688	0.866244	4.62872e-06	9.91845e-05	Cryab	9	50751325	50756636	+	1479	protein_coding	crystallin, alpha B [Source:MGI Symbol;Acc:MGI:88516]	-	502	730	682	1432	420	371	389	41.0686	50.4812	53.0516	95.6127	27.5953	26.74	26.3603
ENSMUSG00000073421	34.5764	57.2232	26.7473	53.8254	21.993	16.7836	6.0723	0.865815	0.000806228	0.00800057	H2-Ab1	17	34263209	34269418	+	1637	protein_coding	histocompatibility 2, class II antigen A, beta 1 [Source:MGI Symbol;Acc:MGI:103070]	-	30	62	27	60	23	16	6	2.60143	4.54447	2.22619	4.24628	1.60176	1.22234	0.430961
ENSMUSG00000040616	92.2038	112.601	132.746	110.342	55.4605	50.3507	59.711	0.864421	4.59613e-06	9.86033e-05	Tmem51	4	142030992	142084304	-	1875	protein_coding	transmembrane protein 51 [Source:MGI Symbol;Acc:MGI:2384874]	-	80	122	134	123	58	48	59	2.90066	3.73909	4.61975	3.6398	1.68894	1.5333	1.77196
ENSMUSG00000040428	96.8139	111.678	176.334	117.519	76.4973	52.4487	47.5664	0.864084	4.56513e-05	0.000722857	Plekha4	7	45526330	45554229	+	6371	protein_coding	pleckstrin homology domain containing, family A (phosphoinositide binding specific) member 4 [Source:MGI Symbol;Acc:MGI:1916467]	-	84	121	178	131	80	50	47	3.28011	3.99388	6.60901	4.1749	2.50887	1.72012	1.5202
ENSMUSG00000030123	495.595	423.637	458.667	550.814	262.003	237.068	265.157	0.86349	6.2872e-12	4.27554e-10	Plxnd1	6	115954811	115995005	-	7301	protein_coding	plexin D1 [Source:MGI Symbol;Acc:MGI:2154244]	-	430	459	463	614	274	226	262	16.2316	14.6456	16.6181	18.9159	8.3066	7.51594	8.192
ENSMUSG00000001123	56.4748	74.7594	90.1483	86.1207	45.8984	33.5671	25.3013	0.86336	0.000108333	0.00150138	Lgals9	11	78962974	78984946	-	2137	protein_coding	lectin, galactose binding, soluble 9 [Source:MGI Symbol;Acc:MGI:109496]	-	49	81	91	96	48	32	25	2.70831	3.78432	4.78246	4.33052	2.1307	1.55824	1.14456
ENSMUSG00000069793	14.9831	21.228	18.8222	24.2214	7.64973	2.09795	6.0723	0.862987	0.000979244	0.00935185	Slfn9	11	82978390	82991830	-	5965	protein_coding	schlafen 9 [Source:MGI Symbol;Acc:MGI:2445121]	-	13	23	19	27	8	2	6	0.225515	0.337257	0.313396	0.382263	0.111455	0.0305663	0.0862141
ENSMUSG00000030022	34.5764	28.6116	24.766	35.8836	11.4746	7.34281	15.1808	0.862808	0.000727772	0.0073821	Adamts9	6	92772699	92943492	-	15048	protein_coding	a disintegrin-like and metallopeptidase (reprolysin type) with thrombospondin type 1 motif, 9 [Source:MGI Symbol;Acc:MGI:1916320]	-	30	31	25	40	12	7	15	0.486644	0.425062	0.385601	0.529561	0.156333	0.100039	0.201547
ENSMUSG00000027803	474.849	449.479	639.954	527.489	290.69	237.068	291.471	0.862755	9.66328e-10	4.40866e-08	Wwtr1	3	57455649	57575910	-	4779	protein_coding	WW domain containing transcription regulator 1 [Source:MGI Symbol;Acc:MGI:1917649]	-	412	487	646	588	304	226	288	6.06922	6.06408	9.04849	7.06934	3.59657	2.93309	3.51417
ENSMUSG00000042828	33.4239	38.7641	56.4665	24.2214	15.2995	17.8325	8.0964	0.862548	0.000779165	0.00780508	Trim72	7	128003949	128011033	+	2233	protein_coding	tripartite motif-containing 72 [Source:MGI Symbol;Acc:MGI:3612190]	-	29	42	57	27	16	17	8	1.01417	1.24154	1.89537	0.770621	0.449376	0.523771	0.231737
ENSMUSG00000030339	156.746	157.825	165.437	122.901	86.0594	78.673	61.7351	0.861754	1.22983e-06	3.06539e-05	Ltbr	6	125306571	125313885	-	2354	protein_coding	lymphotoxin B receptor [Source:MGI Symbol;Acc:MGI:104875]	-	136	171	167	137	90	75	61	10.0063	10.6349	11.6831	8.22663	5.3181	4.86158	3.71758
ENSMUSG00000113621	50.7121	46.1478	86.1858	71.7672	21.0367	33.5671	28.3374	0.860204	0.000264804	0.00318773	2900060N12Rik	12	24796664	24831202	-	4081	bidirectional_promoter_lncRNA	RIKEN cDNA 2900060N12 gene [Source:MGI Symbol;Acc:MGI:1920281]	-	44	50	87	80	22	32	28	1.3634	1.30961	2.56329	2.02314	0.547485	0.873578	0.71866
ENSMUSG00000030124	59.9324	93.2185	121.849	80.7381	43.9859	37.763	41.4941	0.859812	8.7189e-05	0.00124602	Lag3	6	124904361	124911705	-	2109	protein_coding	lymphocyte-activation gene 3 [Source:MGI Symbol;Acc:MGI:106588]	-	52	101	123	90	46	36	41	2.91441	4.78485	6.5548	4.11676	2.07054	1.77758	1.90338
ENSMUSG00000042622	34.5764	22.1509	53.4946	40.3691	13.387	12.5877	16.1928	0.859379	0.000733293	0.00742397	Maff	15	79346621	79359076	+	2594	protein_coding	v-maf musculoaponeurotic fibrosarcoma oncogene family, protein F (avian) [Source:MGI Symbol;Acc:MGI:96910]	TF_bZIP	30	24	54	45	14	12	16	1.28191	0.86686	2.19401	1.56934	0.480446	0.451752	0.566307
ENSMUSG00000025321	996.953	678.372	931.203	879.149	428.385	484.626	473.64	0.853408	5.68899e-11	3.16424e-09	Itgb8	12	119158022	119238802	-	11060	protein_coding	integrin beta 8 [Source:MGI Symbol;Acc:MGI:1338035]	-	865	735	940	980	448	462	468	12.2666	8.81043	12.6749	11.3423	5.1023	5.77208	5.49731
ENSMUSG00000049493	313.493	299.961	283.323	302.319	152.038	163.64	162.94	0.852617	1.98011e-11	1.20961e-09	Pls1	9	95752642	95845311	-	3890	protein_coding	plastin 1 (I-isoform) [Source:MGI Symbol;Acc:MGI:104809]	-	272	325	286	337	159	156	161	11.8385	11.9567	11.8359	11.9708	5.55779	5.9818	5.80426
ENSMUSG00000036362	35.729	31.3805	26.7473	35.8836	14.3432	9.44076	14.1687	0.849806	0.000726206	0.00737293	P2ry13	3	59207892	59210882	-	2528	protein_coding	purinergic receptor P2Y, G-protein coupled 13 [Source:MGI Symbol;Acc:MGI:1921441]	-	31	34	27	40	15	9	14	0.833666	0.772876	0.690402	0.877923	0.323967	0.213233	0.311855
ENSMUSG00000023249	114.102	163.363	185.25	165.065	77.4535	96.5055	59.711	0.849306	1.05074e-05	0.000202518	Parp3	9	106470322	106476949	-	3699	protein_coding	poly (ADP-ribose) polymerase family, member 3 [Source:MGI Symbol;Acc:MGI:1891258]	-	99	177	187	184	81	92	59	4.50196	6.80362	8.08566	6.82889	2.95822	3.68583	2.22235
ENSMUSG00000084939	20.7458	24.9198	11.8877	26.0156	2.86865	9.44076	4.0482	0.847019	0.00119051	0.0110021	Gm830	4	95464724	95487394	-	3502	processed_transcript	predicted gene 830 [Source:MGI Symbol;Acc:MGI:2685676]	-	18	27	12	29	3	9	4	0.349433	0.443053	0.221503	0.459468	0.0467726	0.153927	0.06432
ENSMUSG00000029231	403.391	362.721	287.286	339.1	174.031	172.032	204.434	0.846747	3.62501e-09	1.49488e-07	Pdgfra	5	75152292	75198215	+	10024	protein_coding	platelet derived growth factor receptor, alpha polypeptide [Source:MGI Symbol;Acc:MGI:97530]	-	350	393	290	378	182	164	202	8.66828	8.22731	6.82922	7.64052	3.62006	3.57841	4.14392
ENSMUSG00000000184	163.662	199.358	90.1483	180.315	68.8475	75.5261	84.0002	0.846358	5.01968e-05	0.000783879	Ccnd2	6	127125162	127152193	-	9409	protein_coding	cyclin D2 [Source:MGI Symbol;Acc:MGI:88314]	-	142	216	91	201	72	72	83	5.89362	7.57788	3.59123	6.80857	2.39997	2.63274	2.85343
ENSMUSG00000023186	419.527	394.102	506.218	484.429	242.879	255.949	224.675	0.845575	4.89496e-11	2.7659e-09	Vwa5a	9	38718268	38743337	+	4899	protein_coding	von Willebrand factor A domain containing 5A [Source:MGI Symbol;Acc:MGI:1915026]	-	364	427	511	540	254	244	222	16.7771	16.6358	22.3946	20.3131	9.40217	9.90801	8.47546
ENSMUSG00000024987	100.272	133.829	116.896	104.96	77.4535	45.1058	42.5061	0.845246	4.06311e-05	0.000654345	Cyp26a1	19	37697808	37701528	+	1773	protein_coding	cytochrome P450, family 26, subfamily a, polypeptide 1 [Source:MGI Symbol;Acc:MGI:1096359]	-	87	145	118	117	81	43	42	3.33594	4.69967	4.30218	3.66143	2.49438	1.45261	1.33396
ENSMUSG00000079363	55.3223	43.3789	78.2607	68.1789	32.5113	27.2733	22.2651	0.844306	0.000274474	0.00328876	Gbp4	5	105115767	105139586	-	7494	protein_coding	guanylate binding protein 4 [Source:MGI Symbol;Acc:MGI:97072]	-	48	47	79	76	34	26	22	1.35742	1.1235	2.12426	1.75409	0.772202	0.64778	0.515336
ENSMUSG00000041515	63.3901	80.2971	75.2887	87.0178	31.5551	31.4692	46.5543	0.844102	7.29773e-05	0.00107669	Irf8	8	120736358	120756694	+	7055	protein_coding	interferon regulatory factor 8 [Source:MGI Symbol;Acc:MGI:96395]	IRF	55	87	76	97	33	30	46	2.23632	2.99014	2.93828	3.21891	1.07762	1.07467	1.54926
ENSMUSG00000068245	19.5933	30.4575	37.6444	28.7069	10.5184	14.6856	4.0482	0.843498	0.00120526	0.0110986	Phf11d	14	59347407	59365470	-	4498	protein_coding	PHD finger protein 11D [Source:MGI Symbol;Acc:MGI:1277133]	-	17	33	38	32	11	14	4	0.574418	0.942527	1.22087	0.882461	0.298505	0.416762	0.111953
ENSMUSG00000034401	342.306	289.808	348.706	277.201	210.367	131.122	147.759	0.841124	2.31879e-07	6.79527e-06	Spata6	4	111719984	111829184	+	5616	protein_coding	spermatogenesis associated 6 [Source:MGI Symbol;Acc:MGI:1915196]	-	297	314	352	309	220	125	146	17.6343	15.7591	19.8725	14.9736	10.4907	6.53873	7.18042
ENSMUSG00000038843	34.5764	40.61	37.6444	22.4273	10.5184	13.6366	15.1808	0.841062	0.000895456	0.00870859	Gcnt1	19	17326141	17356667	-	5571	protein_coding	glucosaminyl (N-acetyl) transferase 1, core 2 [Source:MGI Symbol;Acc:MGI:95676]	-	30	44	38	25	11	13	15	0.592885	0.735025	0.714069	0.403232	0.17459	0.226346	0.245547
ENSMUSG00000018008	35.729	35.9953	51.5133	58.3109	21.993	16.7836	19.229	0.84071	0.000521145	0.00562369	Cyth4	15	78597047	78622019	+	7552	protein_coding	cytohesin 4 [Source:MGI Symbol;Acc:MGI:2441702]	-	31	39	52	65	23	16	19	1.7921	1.90575	2.85832	3.06676	1.06784	0.814894	0.909806
ENSMUSG00000034224	31.1188	30.4575	9.90641	23.3244	8.60594	3.14692	7.08435	0.840602	0.00130564	0.0117704	Slc38a8	8	119479602	119501698	-	3499	protein_coding	solute carrier family 38, member 8 [Source:MGI Symbol;Acc:MGI:2685433]	-	27	33	10	26	9	3	7	1.57425	1.62638	0.554392	1.23722	0.421435	0.154103	0.338066
ENSMUSG00000030351	27.6611	38.7641	28.7286	25.1185	14.3432	8.39178	11.1326	0.840265	0.00100564	0.00956339	Tspan11	6	127887589	127953977	+	5326	protein_coding	tetraspanin 11 [Source:MGI Symbol;Acc:MGI:1915748]	-	24	42	29	28	15	8	11	0.570496	0.8439	0.655462	0.543207	0.286359	0.167538	0.216585
ENSMUSG00000036560	109.492	95.0644	128.783	97.7829	66.9351	48.2528	44.5302	0.837273	2.21492e-05	0.000391324	Lgi4	7	31059342	31070935	+	4584	protein_coding	leucine-rich repeat LGI family, member 4 [Source:MGI Symbol;Acc:MGI:2180197]	-	95	103	130	109	70	46	44	4.66317	4.27361	6.06749	4.36667	2.75953	1.98928	1.78898
ENSMUSG00000033685	320.408	333.187	176.334	246.7	166.382	102.799	132.579	0.83506	1.94942e-05	0.000346796	Ucp2	7	100493337	100502020	+	6989	protein_coding	uncoupling protein 2 (mitochondrial, proton carrier) [Source:MGI Symbol;Acc:MGI:109354]	-	278	361	178	275	174	98	131	16.6957	18.326	10.1646	13.4791	8.39246	5.18523	6.51669
ENSMUSG00000066258	139.458	100.602	138.69	159.682	63.1102	40.9099	90.0725	0.835038	8.11004e-05	0.00117296	Trim12a	7	104299894	104315466	-	5781	protein_coding	tripartite motif-containing 12A [Source:MGI Symbol;Acc:MGI:1923931]	-	121	109	140	178	66	39	89	5.4226	4.12904	5.96565	6.5104	2.37544	1.53981	3.30375
ENSMUSG00000027188	29.9662	22.1509	33.6818	38.5749	19.1243	3.14692	4.0482	0.834817	0.00143068	0.0126632	Pamr1	2	102550012	102643041	+	6046	protein_coding	peptidase domain containing associated with muscle regeneration 1 [Source:MGI Symbol;Acc:MGI:2445082]	-	26	24	34	43	20	3	4	0.913954	0.71312	1.13642	1.23363	0.564625	0.092908	0.116468
ENSMUSG00000040569	57.6273	81.2201	41.6069	25.1185	23.9054	17.8325	17.2049	0.834674	0.00105809	0.00997276	Slc26a7	4	14502430	14621805	-	5431	protein_coding	solute carrier family 26, member 7 [Source:MGI Symbol;Acc:MGI:2384791]	-	50	88	42	28	25	17	17	1.96146	2.91805	1.56663	0.896464	0.78764	0.587542	0.552399
ENSMUSG00000049502	200.543	119.984	150.577	174.036	69.8038	62.9384	106.265	0.834427	2.86742e-05	0.000489798	Dtx3l	16	35926511	35939151	-	5725	protein_coding	deltex 3-like, E3 ubiquitin ligase [Source:MGI Symbol;Acc:MGI:2656973]	-	174	130	152	194	73	60	105	2.97292	1.87749	2.46936	2.70521	1.00169	0.903162	1.486
ENSMUSG00000079110	20.7458	34.1494	22.7847	31.3982	13.387	3.14692	10.1205	0.832465	0.00143979	0.0127002	Capn3	2	120456019	120504913	+	5023	protein_coding	calpain 3 [Source:MGI Symbol;Acc:MGI:107437]	-	18	37	23	35	14	3	10	0.58189	1.01104	0.706975	0.923426	0.363475	0.0854418	0.267771
ENSMUSG00000041075	218.984	232.585	274.408	298.731	135.783	111.191	156.868	0.831265	2.23233e-07	6.5626e-06	Fzd7	1	59482424	59486955	+	4532	protein_coding	frizzled class receptor 7 [Source:MGI Symbol;Acc:MGI:108570]	-	190	252	277	333	142	106	155	2.85017	3.19535	3.95098	4.07688	1.71074	1.40089	1.92595
ENSMUSG00000074063	49.5595	41.533	39.6256	55.6196	23.9054	11.5387	24.2892	0.83086	0.000617655	0.00647513	Osgin1	8	119434124	119446256	+	2674	protein_coding	oxidative stress induced growth inhibitor 1 [Source:MGI Symbol;Acc:MGI:1919089]	-	43	45	40	62	25	11	24	2.38055	2.10582	2.10561	2.80135	1.11155	0.536516	1.10056
ENSMUSG00000029622	123.323	130.137	175.343	138.152	79.3659	59.7915	77.9279	0.830695	5.33737e-06	0.000112497	Arpc1b	5	145114215	145130705	+	5115	protein_coding	actin related protein 2/3 complex, subunit 1B [Source:MGI Symbol;Acc:MGI:1343142]	-	107	141	177	154	83	57	77	7.56951	8.43148	11.906	8.89141	4.71564	3.55255	4.51201
ENSMUSG00000004266	35.729	31.3805	30.7099	26.0156	13.387	15.7346	3.03615	0.830449	0.00139996	0.0124402	Ptpn6	6	124720707	124738714	-	2802	protein_coding	protein tyrosine phosphatase, non-receptor type 6 [Source:MGI Symbol;Acc:MGI:96055]	-	31	34	31	29	14	15	3	2.20451	2.04376	2.09613	1.68311	0.79957	0.939771	0.176712
ENSMUSG00000031075	148.679	111.678	132.746	116.622	57.373	78.673	58.6989	0.82849	7.53448e-06	0.000151201	Ano1	7	144588549	144751974	-	6244	protein_coding	anoctamin 1, calcium activated chloride channel [Source:MGI Symbol;Acc:MGI:2142149]	-	129	121	134	130	60	75	58	4.41811	3.50294	4.36375	3.63376	1.65035	2.26302	1.64539
ENSMUSG00000024998	1010.78	748.517	821.242	950.019	387.267	450.009	581.929	0.826616	7.0646e-09	2.76764e-07	Plce1	19	38481109	38785030	+	15998	protein_coding	phospholipase C, epsilon 1 [Source:MGI Symbol;Acc:MGI:1921305]	-	877	811	829	1059	405	429	575	11.2473	8.79166	10.1091	11.0844	4.17142	4.84717	6.10819
ENSMUSG00000023341	14.9831	30.4575	36.6537	25.1185	9.56216	4.19589	12.1446	0.82602	0.00158884	0.0137458	Mx2	16	97535308	97560900	+	3614	polymorphic_pseudogene	MX dynamin-like GTPase 2 [Source:MGI Symbol;Acc:MGI:97244]	-	13	33	37	28	10	4	12	0.519879	1.11551	1.40692	0.913866	0.321172	0.140929	0.397498
ENSMUSG00000023915	613.155	445.787	414.088	591.183	305.033	250.705	268.193	0.825872	3.86768e-08	1.33594e-06	Tnfrsf21	17	43016555	43089189	+	4109	protein_coding	tumor necrosis factor receptor superfamily, member 21 [Source:MGI Symbol;Acc:MGI:2151075]	-	532	483	418	659	319	239	265	13.6843	10.5017	10.2234	13.8344	6.58992	5.41613	5.64613
ENSMUSG00000044811	17.2882	10.1525	19.8128	11.6622	1.91243	3.14692	4.0482	0.825616	0.00133947	0.0120152	Cd300c2	11	114996721	115001880	-	1275	protein_coding	CD300C molecule 2 [Source:MGI Symbol;Acc:MGI:2153249]	-	15	11	20	13	2	3	4	0.829075	0.51392	1.05109	0.586424	0.0887792	0.146085	0.183129
ENSMUSG00000044080	310.035	469.784	507.208	323.85	240.966	210.844	176.097	0.825183	1.98713e-06	4.66277e-05	S100a1	3	90511034	90514392	-	694	protein_coding	S100 calcium binding protein A1 [Source:MGI Symbol;Acc:MGI:1338917]	-	269	509	512	361	252	201	174	29.167	46.6507	52.7859	31.9458	21.9442	19.2007	15.6273
ENSMUSG00000034810	668.477	447.633	521.077	541.843	253.397	294.761	327.904	0.824493	9.54989e-09	3.66948e-07	Scn7a	2	66673425	66784914	-	7338	protein_coding	sodium channel, voltage-gated, type VII, alpha [Source:MGI Symbol;Acc:MGI:102965]	-	580	485	526	604	265	281	324	5.37351	3.79815	4.63365	4.56702	1.97176	2.2936	2.48639
ENSMUSG00000024818	40.3391	34.1494	36.6537	31.3982	20.0805	13.6366	10.1205	0.821471	0.000983532	0.00938287	Slc25a45	19	5877808	5885766	+	2650	protein_coding	solute carrier family 25, member 45 [Source:MGI Symbol;Acc:MGI:2147731]	-	35	37	37	35	21	13	10	1.60232	1.4318	1.61061	1.30772	0.77211	0.524331	0.379207
ENSMUSG00000028417	19.5933	12.9214	21.7941	15.2505	3.82486	6.29384	4.0482	0.821219	0.0016811	0.0143001	Tal2	4	53779705	53788712	+	2971	protein_coding	T cell acute lymphocytic leukemia 2 [Source:MGI Symbol;Acc:MGI:99540]	bHLH	17	14	22	17	4	6	4	0.389004	0.27079	0.478669	0.317482	0.0735095	0.120959	0.0758158
ENSMUSG00000055737	156.746	160.594	146.615	165.962	85.1032	55.5956	102.217	0.821113	6.97977e-06	0.00014117	Ghr	15	3317760	3583492	-	9053	protein_coding	growth hormone receptor [Source:MGI Symbol;Acc:MGI:95708]	-	136	174	148	185	89	53	101	5.67926	6.1419	5.87655	6.30508	2.98485	1.94989	3.49357
ENSMUSG00000026656	33.4239	18.4591	18.8222	26.9127	12.4308	6.29384	4.0482	0.820671	0.00172194	0.0145549	Fcgr2b	1	170958617	170976547	-	5790	protein_coding	Fc receptor, IgG, low affinity IIb [Source:MGI Symbol;Acc:MGI:95499]	-	29	20	19	30	13	6	4	1.23453	0.719669	0.769067	1.04229	0.444452	0.225027	0.141045
ENSMUSG00000090873	24.2035	27.6887	97.0828	52.0312	13.387	17.8325	20.241	0.819599	0.00168227	0.0143001	Gm17112	5	137532423	137540718	+	432	antisense	predicted gene 17112 [Source:MGI Symbol;Acc:MGI:4937939]	-	21	30	98	58	14	17	20	3.30478	3.99067	14.6642	7.44934	1.76942	2.35697	2.60705
ENSMUSG00000095115	239.73	184.591	192.184	200.051	118.571	92.3096	113.35	0.818927	2.52345e-07	7.28768e-06	Itpripl2	7	118485111	118491975	-	6865	protein_coding	inositol 1,4,5-triphosphate receptor interacting protein-like 2 [Source:MGI Symbol;Acc:MGI:2442416]	-	208	200	194	223	124	88	112	2.05982	1.67416	1.82674	1.80234	0.986206	0.767769	0.918713
ENSMUSG00000020044	1327.73	1337.36	1224.43	1482.89	721.943	646.167	852.146	0.818368	3.00803e-13	2.59367e-11	Timp3	10	86300372	86349506	+	8144	protein_coding	tissue inhibitor of metalloproteinase 3 [Source:MGI Symbol;Acc:MGI:98754]	-	1152	1449	1236	1653	755	616	842	34.3649	36.5369	35.0582	40.2441	18.0879	16.1892	20.8051
ENSMUSG00000028255	255.865	283.347	281.342	285.275	191.243	115.387	132.579	0.81806	3.69258e-07	1.01439e-05	Clca1	3	145003817	145032776	-	3777	protein_coding	chloride channel accessory 1 [Source:MGI Symbol;Acc:MGI:1346342]	-	222	307	284	318	200	110	131	9.96203	11.6448	12.1177	11.6463	7.20782	4.34879	4.86924
ENSMUSG00000033170	172.882	181.822	236.763	179.418	131.958	82.8689	84.0002	0.813569	8.65989e-06	0.000171683	Card10	15	78775138	78803042	-	4952	protein_coding	caspase recruitment domain family, member 10 [Source:MGI Symbol;Acc:MGI:2146012]	-	150	197	239	200	138	79	83	3.60978	4.00734	5.46883	3.92812	2.66715	1.67493	1.65448
ENSMUSG00000064179	496.748	630.379	911.39	737.408	447.509	331.475	319.808	0.811382	1.79041e-06	4.23901e-05	Tnnt1	7	4504570	4516382	-	2204	protein_coding	troponin T1, skeletal, slow [Source:MGI Symbol;Acc:MGI:1333868]	-	431	683	920	822	468	316	316	41.503	55.5935	84.2361	64.6012	36.1932	26.8084	25.2049
ENSMUSG00000026365	419.527	338.725	382.387	403.691	224.711	224.48	184.193	0.810795	6.43408e-10	3.0353e-08	Cfh	1	140084708	140183764	-	8383	protein_coding	complement component factor h [Source:MGI Symbol;Acc:MGI:88385]	-	364	367	386	450	235	214	182	7.09874	6.04988	7.15773	7.1624	3.68067	3.67684	2.93999
ENSMUSG00000020393	1605.5	1478.57	1983.26	1760.09	1018.37	888.48	933.111	0.809692	3.80641e-13	3.22043e-11	Kremen1	11	5191552	5261558	-	7722	protein_coding	kringle containing transmembrane protein 1 [Source:MGI Symbol;Acc:MGI:1933988]	-	1393	1602	2002	1962	1065	847	922	23.5635	22.9062	32.2004	27.0866	14.4683	12.6227	12.9186
ENSMUSG00000037321	84.1359	84.9119	90.1483	117.519	54.5043	49.3017	38.4579	0.808053	6.57276e-05	0.000986551	Tap1	17	34187553	34197225	+	5476	protein_coding	transporter 1, ATP-binding cassette, sub-family B (MDR/TAP) [Source:MGI Symbol;Acc:MGI:98483]	-	73	92	91	131	57	47	38	2.10023	2.23734	2.48939	3.07596	1.31704	1.1913	0.90557
ENSMUSG00000005640	99.119	71.0676	74.2981	75.3556	39.2048	37.763	42.5061	0.807759	8.44376e-05	0.00121441	Insrr	3	87796951	87816101	+	5714	protein_coding	insulin receptor-related receptor [Source:MGI Symbol;Acc:MGI:1346037]	-	86	77	75	84	41	36	42	1.82993	1.38493	1.51742	1.45875	0.700647	0.67487	0.740254
ENSMUSG00000079227	11.5255	18.4591	20.8035	23.3244	4.78108	7.34281	4.0482	0.807268	0.00203692	0.0165872	Ccr5	9	124121543	124147699	+	8434	protein_coding	chemokine (C-C motif) receptor 5 [Source:MGI Symbol;Acc:MGI:107182]	-	10	20	21	26	5	7	4	0.376435	0.636385	0.751652	0.798783	0.151161	0.23215	0.124722
ENSMUSG00000024164	100.272	58.1462	102.036	128.284	61.1978	22.0284	46.5543	0.807131	0.000778321	0.00780508	C3	17	57203970	57228136	-	5143	protein_coding	complement component 3 [Source:MGI Symbol;Acc:MGI:88227]	-	87	63	103	143	64	21	46	3.55019	2.17307	3.99648	4.76249	2.09745	0.754975	1.55484
ENSMUSG00000002602	473.697	469.784	543.862	439.574	305.033	227.627	260.097	0.806792	6.34471e-10	3.001e-08	Axl	7	25757273	25788705	-	5033	protein_coding	AXL receptor tyrosine kinase [Source:MGI Symbol;Acc:MGI:1347244]	-	411	509	549	490	319	217	257	16.4944	17.2668	20.9495	16.0493	10.2817	7.67246	8.54323
ENSMUSG00000048572	16.1357	16.6132	15.8503	21.5302	4.78108	7.34281	3.03615	0.805908	0.00206877	0.016801	Tmem252	19	24674008	24679661	+	2462	protein_coding	transmembrane protein 252 [Source:MGI Symbol;Acc:MGI:3583948]	-	14	18	16	24	5	7	3	0.386587	0.420138	0.420095	0.540875	0.110884	0.170294	0.0686176
ENSMUSG00000045246	916.275	729.135	1059.99	1018.2	493.407	516.095	529.302	0.805251	2.78652e-10	1.41453e-08	Kcng4	8	119623854	119635680	-	3806	protein_coding	potassium voltage-gated channel, subfamily G, member 4 [Source:MGI Symbol;Acc:MGI:1913983]	-	795	790	1070	1135	516	492	523	19.0308	15.9851	24.3546	22.1744	9.92014	10.3761	10.3702
ENSMUSG00000025225	116.407	119.061	111.942	102.268	60.2416	53.4976	62.7471	0.804874	7.08997e-06	0.000143078	Nfkb2	19	46304737	46312090	+	3289	protein_coding	nuclear factor of kappa light polypeptide gene enhancer in B cells 2, p49/p100 [Source:MGI Symbol;Acc:MGI:1099800]	RHD	101	129	113	114	63	51	62	2.19444	2.36915	2.33447	2.0215	1.09931	0.976232	1.11581
ENSMUSG00000032359	282.374	312.882	356.631	390.234	214.192	170.983	159.904	0.804212	9.82107e-08	3.14921e-06	Ctsh	9	90054152	90076089	+	4499	protein_coding	cathepsin H [Source:MGI Symbol;Acc:MGI:107285]	-	245	339	360	435	224	163	158	16.9787	19.8581	23.7219	24.6033	12.4671	9.95193	9.06965
ENSMUSG00000027375	78.3732	80.2971	74.2981	85.2236	43.0297	37.763	40.482	0.804088	5.19041e-05	0.00080496	Mal	2	127633226	127656695	-	2778	protein_coding	myelin and lymphocyte protein, T cell differentiation protein [Source:MGI Symbol;Acc:MGI:892970]	-	68	87	75	95	45	36	40	2.83267	3.06342	2.97068	3.22981	1.50549	1.32121	1.3802
ENSMUSG00000070509	405.697	309.19	365.547	354.351	207.499	187.766	195.326	0.803872	1.10572e-09	4.95675e-08	Rgma	7	73375509	73419899	+	5544	protein_coding	repulsive guidance molecule family member A [Source:MGI Symbol;Acc:MGI:2679262]	-	352	335	369	395	217	179	193	9.35878	7.52873	9.32848	8.57116	4.63357	4.19286	4.25039
ENSMUSG00000016918	1918.99	1463.81	1901.04	1657.82	928.486	900.019	1067.71	0.80302	2.12502e-12	1.61582e-10	Sulf1	1	12692277	12861192	+	11294	protein_coding	sulfatase 1 [Source:MGI Symbol;Acc:MGI:2138563]	-	1665	1586	1919	1848	971	858	1055	38.5537	31.0424	42.2507	34.9236	18.0572	17.5033	20.2348
ENSMUSG00000031351	43.7968	97.8333	45.5695	42.1633	21.993	25.1754	26.3133	0.802707	0.00121823	0.0111952	Zfp185	X	72987339	73031543	+	3707	protein_coding	zinc finger protein 185 [Source:MGI Symbol;Acc:MGI:108095]	-	38	106	46	47	23	24	26	1.04169	2.45619	1.19901	1.05153	0.506364	0.579626	0.59037
ENSMUSG00000026308	29.9662	29.5346	45.5695	27.8098	21.993	5.24487	5.06025	0.802628	0.00216861	0.0174545	Klhl30	1	91351016	91362416	+	3089	protein_coding	kelch-like 30 [Source:MGI Symbol;Acc:MGI:1918038]	-	26	32	46	31	23	5	5	0.57222	0.595306	0.962621	0.556823	0.406533	0.0969484	0.0911495
ENSMUSG00000021676	240.882	275.964	161.475	279.892	131.958	102.799	140.675	0.802493	1.16654e-05	0.000221287	Iqgap2	13	95627177	95891922	-	5771	protein_coding	IQ motif containing GTPase activating protein 2 [Source:MGI Symbol;Acc:MGI:2449975]	-	209	299	163	312	138	98	139	2.46208	2.97734	1.82579	2.99969	1.30561	1.0171	1.35633
ENSMUSG00000002985	12575.4	15358.9	13809.5	17938.2	9710.37	7437.22	7601.51	0.802149	1.88027e-10	9.70899e-09	Apoe	7	19696109	19699188	-	2138	protein_coding	apolipoprotein E [Source:MGI Symbol;Acc:MGI:88057]	-	10911	16641	13940	19996	10155	7090	7511	853.596	1100.44	1036.95	1276.72	638.038	488.669	486.721
ENSMUSG00000003872	72.6105	157.825	257.567	153.402	69.8038	92.3096	57.6869	0.80184	0.00071932	0.00733194	Lin7b	7	45367891	45370583	-	1463	protein_coding	lin-7 homolog B (C. elegans) [Source:MGI Symbol;Acc:MGI:1330858]	-	63	171	260	171	73	88	57	8.77664	20.1365	34.4405	19.4424	8.1675	10.8007	6.57745
ENSMUSG00000001870	170.577	185.514	124.821	200.948	70.76	88.1137	107.277	0.800767	1.97635e-05	0.000351241	Ltbp1	17	75005568	75392512	+	10480	protein_coding	latent transforming growth factor beta binding protein 1 [Source:MGI Symbol;Acc:MGI:109151]	-	148	201	126	224	74	84	106	2.76267	3.17149	2.23638	3.41257	1.10937	1.38143	1.63896
ENSMUSG00000040663	80.6783	95.0644	132.746	78.944	52.5919	35.6651	54.6507	0.800233	0.000196308	0.00249482	Clcf1	19	4214238	4223490	+	3713	protein_coding	cardiotrophin-like cytokine factor 1 [Source:MGI Symbol;Acc:MGI:1930088]	-	70	103	134	88	55	34	54	2.40348	2.98937	4.37477	2.46599	1.51664	1.0285	1.53579
ENSMUSG00000052688	65.6952	49.8396	67.3636	82.5323	34.4238	27.2733	34.4097	0.80007	0.000307684	0.00362403	Rab7b	1	131688695	131715439	+	4624	protein_coding	RAB7B, member RAS oncogene family [Source:MGI Symbol;Acc:MGI:2442295]	-	57	54	68	92	36	26	34	2.50006	2.00203	2.83591	3.29329	1.26811	1.00469	1.23523
ENSMUSG00000038235	228.204	201.204	234.782	244.009	126.22	100.701	141.687	0.799584	2.06774e-07	6.13885e-06	F11r	1	171437535	171464603	+	2663	protein_coding	F11 receptor [Source:MGI Symbol;Acc:MGI:1321398]	-	198	218	237	272	132	96	140	11.1616	10.3876	12.7033	12.514	5.97603	4.76774	6.53707
ENSMUSG00000038732	137.153	131.983	176.334	120.21	75.5411	93.3586	45.5423	0.7994	8.76422e-05	0.00125151	Mboat1	13	30136489	30246717	+	3659	protein_coding	membrane bound O-acyltransferase domain containing 1 [Source:MGI Symbol;Acc:MGI:2387184]	-	119	143	178	134	79	89	45	6.45144	6.55309	9.17567	5.92899	3.43966	4.2509	2.02077
ENSMUSG00000024935	703.054	586.077	790.532	684.48	393.005	378.679	383.567	0.797588	1.33049e-11	8.47233e-10	Slc1a1	19	28835049	28913960	+	6170	protein_coding	solute carrier family 1 (neuronal/epithelial high affinity glutamate transporter, system Xag), member 1 [Source:MGI Symbol;Acc:MGI:105083]	-	610	635	798	763	411	361	379	18.9189	16.6472	23.533	19.3133	10.2374	9.86405	9.73646
ENSMUSG00000001247	54.1697	54.4544	76.2794	63.6934	30.5989	34.6161	25.3013	0.797009	0.000320353	0.00375851	Lsr	7	30957770	30973464	-	2172	protein_coding	lipolysis stimulated lipoprotein receptor [Source:MGI Symbol;Acc:MGI:1927471]	-	47	59	77	71	32	33	25	1.7253	1.83071	2.6876	2.12711	0.943399	1.06724	0.760154
ENSMUSG00000021281	18.4408	10.1525	19.8128	12.5593	3.82486	1.04897	5.06025	0.796997	0.00194651	0.0160231	Tnfaip2	12	111442469	111455018	+	4984	protein_coding	tumor necrosis factor, alpha-induced protein 2 [Source:MGI Symbol;Acc:MGI:104960]	-	16	11	20	14	4	1	5	0.686708	0.399067	0.816188	0.490395	0.137877	0.0378123	0.177753
ENSMUSG00000035258	110.645	164.286	106.989	137.255	73.6286	53.4976	73.8797	0.795996	4.26788e-05	0.00068184	Abi3bp	16	56477878	56690135	+	7416	protein_coding	ABI gene family, member 3 (NESH) binding protein [Source:MGI Symbol;Acc:MGI:2444583]	-	96	178	108	153	77	51	73	1.80489	2.82878	1.93068	2.34767	1.16265	0.844754	1.13683
ENSMUSG00000027204	659.257	587	353.659	719.467	314.595	243.362	356.242	0.794085	1.50074e-05	0.000275126	Fbn1	2	125300594	125507993	-	12128	protein_coding	fibrillin 1 [Source:MGI Symbol;Acc:MGI:95489]	-	572	636	357	802	329	232	352	4.91369	4.61816	2.916	5.62279	2.26979	1.75582	2.50466
ENSMUSG00000024827	969.292	905.419	795.485	1009.23	535.481	483.577	531.326	0.793491	3.71562e-13	3.15846e-11	Gldc	19	30098449	30175418	-	3754	protein_coding	glycine decarboxylase [Source:MGI Symbol;Acc:MGI:1341155]	-	841	981	803	1125	560	461	525	15.2303	15.017	13.8273	16.6277	8.14479	7.35521	7.87531
ENSMUSG00000020467	1066.11	1053.09	891.577	1088.17	665.526	503.507	549.543	0.792966	1.97338e-11	1.20961e-09	Efemp1	11	28853204	28926743	+	2037	protein_coding	epidermal growth factor-containing fibulin-like extracellular matrix protein 1 [Source:MGI Symbol;Acc:MGI:1339998]	-	925	1141	900	1213	696	480	543	49.206	51.3054	45.5226	52.6627	29.7348	22.4957	23.9261
ENSMUSG00000018862	175.187	199.358	193.175	183.006	103.271	104.897	100.193	0.792592	9.81678e-08	3.14921e-06	Otop3	11	115334731	115346927	+	2426	protein_coding	otopetrin 3 [Source:MGI Symbol;Acc:MGI:1916852]	-	152	216	195	204	108	100	99	4.31465	5.1827	5.26313	4.72605	2.46209	2.50082	2.32773
ENSMUSG00000009614	198.238	177.207	160.484	170.447	101.359	68.1832	112.338	0.790529	5.92434e-06	0.000123854	Sardh	2	27188393	27248337	-	5432	protein_coding	sarcosine dehydrogenase [Source:MGI Symbol;Acc:MGI:2183102]	-	172	192	162	190	106	65	111	9.5222	8.98485	8.5277	8.58477	4.71296	3.17032	5.09011
ENSMUSG00000073409	68.0003	87.6808	105.008	79.8411	37.2924	46.1548	46.5543	0.788403	0.000132042	0.00178288	H2-Q6	17	35424850	35430055	+	2085	protein_coding	histocompatibility 2, Q region locus 6 [Source:MGI Symbol;Acc:MGI:95935]	-	59	95	106	89	39	44	46	2.61648	3.56114	4.46971	3.22123	1.38902	1.71909	1.68973
ENSMUSG00000021835	40.3391	51.6855	18.8222	26.0156	19.1243	4.19589	10.1205	0.788315	0.00261047	0.020173	Bmp4	14	46383520	46390669	-	2248	protein_coding	bone morphogenetic protein 4 [Source:MGI Symbol;Acc:MGI:88180]	-	35	56	19	29	20	4	10	2.1283	2.87842	1.09857	1.43923	0.97673	0.214292	0.503687
ENSMUSG00000050069	283.527	258.428	332.855	329.232	139.608	183.57	174.073	0.787199	1.01712e-07	3.25568e-06	Grem2	1	174833785	174921819	-	3745	protein_coding	gremlin 2, DAN family BMP antagonist [Source:MGI Symbol;Acc:MGI:1344367]	-	246	280	336	367	146	175	172	4.46571	4.29649	5.79966	5.43736	2.12857	2.79882	2.5863
ENSMUSG00000051506	18.4408	25.8428	9.90641	19.736	5.7373	5.24487	5.06025	0.786581	0.00261881	0.02022	Wdfy4	14	32959547	33185508	-	10552	protein_coding	WD repeat and FYVE domain containing 4 [Source:MGI Symbol;Acc:MGI:3584510]	-	16	28	10	22	6	5	5	0.211008	0.312131	0.125397	0.236792	0.063549	0.0580938	0.054619
ENSMUSG00000043279	352.679	391.333	393.285	450.339	184.55	172.032	289.446	0.786325	1.4802e-06	3.58531e-05	Trim56	5	137105644	137116209	-	9281	protein_coding	tripartite motif-containing 56 [Source:MGI Symbol;Acc:MGI:2685298]	-	306	424	397	502	193	164	286	4.10076	4.80296	5.05872	5.49051	2.0772	1.93628	3.17471
ENSMUSG00000035352	9.22038	11.0755	12.8783	14.3534	3.82486	0	0	0.78458	0.00127081	0.011555	Ccl12	11	82101845	82103400	+	537	protein_coding	chemokine (C-C motif) ligand 12 [Source:MGI Symbol;Acc:MGI:108224]	-	8	12	13	16	4	0	0	1.06851	1.35479	1.65098	1.74412	0.42907	0	0
ENSMUSG00000028128	115.255	187.36	201.1	150.711	87.0156	102.799	65.7833	0.782469	6.98906e-05	0.00103662	F3	3	121723537	121735048	+	2527	protein_coding	coagulation factor III [Source:MGI Symbol;Acc:MGI:88381]	-	100	203	203	168	91	98	65	5.92196	10.1616	11.4306	8.11972	4.32799	5.11296	3.18841
ENSMUSG00000022468	51.8646	40.61	63.401	63.6934	19.1243	31.4692	27.3254	0.781517	0.00082048	0.00811073	Endou	15	97711015	97731339	-	2745	protein_coding	endonuclease, polyU-specific [Source:MGI Symbol;Acc:MGI:97746]	-	45	44	64	71	20	30	27	1.65635	1.36897	2.2399	2.13287	0.59122	0.972843	0.823188
ENSMUSG00000091754	13.8306	15.6902	18.8222	17.9418	4.78108	5.24487	5.06025	0.780301	0.00286945	0.0217655	Gm3636	14	6735685	6742332	-	1746	protein_coding	predicted gene 3636 [Source:MGI Symbol;Acc:MGI:3781812]	-	12	17	19	20	5	5	5	0.72068	0.862999	1.08498	0.980296	0.241163	0.264553	0.248729
ENSMUSG00000076617	36.8815	43.3789	27.738	20.6331	15.2995	8.39178	14.1687	0.779442	0.00244632	0.0191591	Ighm	12	113418558	113422730	-	1886	IG_C_gene	immunoglobulin heavy constant mu [Source:MGI Symbol;Acc:MGI:96448]	-	32	47	28	23	16	8	14	1.36394	1.69334	1.13478	0.800093	0.547704	0.300412	0.494276
ENSMUSG00000022508	606.24	558.388	644.907	553.505	330.851	346.161	329.928	0.778823	4.94462e-13	4.14451e-11	Bcl6	16	23965052	23988852	-	6700	protein_coding	B cell leukemia/lymphoma 6 [Source:MGI Symbol;Acc:MGI:107187]	ZBTB	526	605	651	617	346	330	326	9.58961	9.32333	11.2851	9.1805	5.06606	5.30042	4.92297
ENSMUSG00000097415	53.0172	51.6855	54.4853	48.4429	26.774	25.1754	24.2892	0.778476	0.000490807	0.00536376	AU020206	7	75769038	75782099	-	3189	lincRNA	expressed sequence AU020206 [Source:MGI Symbol;Acc:MGI:2142134]	-	46	56	55	54	28	24	24	1.70702	1.75659	1.94067	1.63547	0.834486	0.784647	0.737714
ENSMUSG00000020143	33.4239	17.5362	32.6912	25.1185	11.4746	11.5387	8.0964	0.778366	0.00262701	0.020258	Dock2	11	34226815	34783892	-	11425	protein_coding	dedicator of cyto-kinesis 2 [Source:MGI Symbol;Acc:MGI:2149010]	-	29	19	33	28	12	11	8	0.608124	0.336782	0.657985	0.479202	0.202095	0.203221	0.138957
ENSMUSG00000003617	5572.56	4151.45	4290.47	5317.95	2341.77	2543.76	3252.73	0.77769	2.46298e-09	1.04191e-07	Cp	3	19957054	20009145	+	9566	protein_coding	ceruloplasmin [Source:MGI Symbol;Acc:MGI:88476]	-	4835	4498	4331	5928	2449	2425	3214	162.323	127.645	138.254	162.426	66.0313	71.7258	89.3765
ENSMUSG00000102752	154.441	131.983	150.577	179.418	86.0594	75.5261	89.0604	0.777527	4.34408e-06	9.42054e-05	Gm7694	1	170298199	170306332	-	3827	protein_coding	predicted gene 7694 [Source:MGI Symbol;Acc:MGI:3649135]	-	134	143	152	200	90	72	88	2.38042	2.14726	2.56744	2.89965	1.28402	1.12684	1.29487
ENSMUSG00000027860	39.1866	54.4544	78.2607	56.5167	24.8616	28.3223	28.3374	0.776889	0.000872149	0.00850947	Vangl1	3	102153583	102204693	-	7156	protein_coding	VANGL planar cell polarity 1 [Source:MGI Symbol;Acc:MGI:2159344]	-	34	59	79	63	26	27	28	1.29204	1.89518	2.85451	1.95391	0.793504	0.903945	0.881353
ENSMUSG00000030849	53.0172	77.5283	29.7192	56.5167	23.9054	7.34281	32.3856	0.773088	0.00275253	0.0210809	Fgfr2	7	130162451	133123350	-	10328	protein_coding	fibroblast growth factor receptor 2 [Source:MGI Symbol;Acc:MGI:95523]	-	46	84	30	63	25	7	32	1.45522	2.24621	0.902402	1.62659	0.63517	0.195097	0.838525
ENSMUSG00000021838	194.78	203.05	337.809	230.552	114.746	126.926	147.759	0.768149	2.75501e-05	0.00047374	Samd4	14	46882854	47105815	+	8658	protein_coding	sterile alpha motif domain containing 4 [Source:MGI Symbol;Acc:MGI:1921730]	-	169	220	341	257	120	121	146	5.01498	5.5183	9.62154	6.22417	2.85985	3.16336	3.58864
ENSMUSG00000105218	19.5933	26.7657	53.4946	29.604	13.387	14.6856	9.10845	0.767896	0.00308644	0.0230249	Gm38413	5	99730854	99753973	-	2348	lincRNA	predicted gene, 38413 [Source:MGI Symbol;Acc:MGI:5621298]	-	17	29	54	33	14	14	9	0.857366	1.23628	2.58952	1.35831	0.567054	0.622052	0.375972
ENSMUSG00000001827	175.187	245.506	174.353	183.006	129.089	83.9178	102.217	0.767841	1.68697e-05	0.000306153	Folr1	7	101858331	101870788	-	2297	protein_coding	folate receptor 1 (adult) [Source:MGI Symbol;Acc:MGI:95568]	-	152	266	176	204	135	80	101	13.4377	19.8776	14.7945	14.719	9.58504	6.23092	7.39601
ENSMUSG00000079235	25.356	23.0739	23.7754	41.2662	15.2995	7.34281	10.1205	0.76685	0.00308685	0.0230249	Ccdc13	9	121797627	121839461	-	3418	protein_coding	coiled-coil domain containing 13 [Source:MGI Symbol;Acc:MGI:1920144]	-	22	25	24	46	16	7	10	1.34139	1.28847	1.3914	2.28906	0.783486	0.376021	0.505042
ENSMUSG00000032135	169.424	182.745	180.297	149.814	103.271	90.2117	89.0604	0.766842	1.39684e-06	3.42949e-05	Mcam	9	44134469	44142727	+	3350	protein_coding	melanoma cell adhesion molecule [Source:MGI Symbol;Acc:MGI:1933966]	-	147	198	182	167	108	86	88	7.00818	7.97909	8.25025	6.49786	4.13514	3.61216	3.47509
ENSMUSG00000074715	46.1019	68.2987	285.305	108.548	27.7303	15.7346	27.3254	0.765206	0.00226788	0.0180359	Ccl28	13	119623819	119654359	+	4844	protein_coding	chemokine (C-C motif) ligand 28 [Source:MGI Symbol;Acc:MGI:1861731]	-	40	74	288	121	29	15	27	1.05894	1.65594	7.24958	2.61435	0.61658	0.349852	0.592067
ENSMUSG00000058897	383.798	391.333	534.946	435.089	269.653	238.117	228.723	0.764839	4.86813e-08	1.64903e-06	Col25a1	3	130131501	130599877	+	12947	protein_coding	collagen, type XXV, alpha 1 [Source:MGI Symbol;Acc:MGI:1924268]	-	333	424	540	485	282	227	226	6.65257	7.15998	10.2576	7.90776	4.52453	3.99533	3.7398
ENSMUSG00000115388	8.06783	13.8443	17.8315	14.3534	1.91243	0	5.06025	0.764544	0.00224747	0.0179405	Eppk1	15	76101481	76120195	-	12332	protein_coding	epiplakin 1 [Source:MGI Symbol;Acc:MGI:2386306]	-	7	15	18	16	2	0	5	0.0385897	0.0698981	0.0943527	0.071988	0.00885488	0	0.0228317
ENSMUSG00000056481	44.9493	29.5346	21.7941	19.736	12.4308	8.39178	12.1446	0.764134	0.00324728	0.0239147	Cd248	19	5068078	5070637	+	2560	protein_coding	CD248 antigen, endosialin [Source:MGI Symbol;Acc:MGI:1917695]	-	39	32	22	22	13	8	12	1.0357	0.71832	0.555518	0.476822	0.277262	0.187171	0.263963
ENSMUSG00000030340	21.8984	23.0739	32.6912	21.5302	15.2995	1.04897	4.0482	0.763888	0.00331519	0.0242635	Scnn1a	6	125320659	125344943	+	4132	protein_coding	sodium channel, nonvoltage-gated 1 alpha [Source:MGI Symbol;Acc:MGI:101782]	-	19	25	33	24	16	1	4	0.497189	0.552979	0.821089	0.512561	0.336254	0.0230542	0.0867008
ENSMUSG00000029723	638.511	687.602	731.093	746.379	425.516	430.079	351.182	0.762869	1.24559e-11	7.98818e-10	Tsc22d4	5	137745730	137768450	+	7509	protein_coding	TSC22 domain family, member 4 [Source:MGI Symbol;Acc:MGI:1926079]	-	554	745	738	832	445	410	347	24.1276	27.4259	30.5611	29.5729	15.5648	15.7315	12.5178
ENSMUSG00000026483	338.849	434.712	145.624	304.114	158.732	77.624	127.518	0.761863	0.00319794	0.0236868	Fam129a	1	151571186	151721939	+	7380	protein_coding	family with sequence similarity 129, member A [Source:MGI Symbol;Acc:MGI:2137237]	-	294	471	147	339	166	74	126	6.4103	8.68066	3.04759	6.0325	2.90682	1.42149	2.2756
ENSMUSG00000029153	262.781	352.569	278.37	288.863	190.287	162.591	144.723	0.759747	3.56885e-07	9.8793e-06	Ociad2	5	73322199	73341028	-	2722	protein_coding	OCIA domain containing 2 [Source:MGI Symbol;Acc:MGI:1916377]	-	228	382	281	322	199	155	143	8.42412	11.9304	9.87197	9.70983	5.90502	5.04548	4.37644
ENSMUSG00000031538	300.815	252.89	293.23	303.217	185.506	172.032	125.494	0.75841	5.15137e-07	1.36519e-05	Plat	8	22757727	22782844	+	6241	protein_coding	plasminogen activator, tissue [Source:MGI Symbol;Acc:MGI:97610]	-	261	274	296	338	194	164	124	7.4149	6.57985	7.99584	7.83696	4.42635	4.10478	2.91797
ENSMUSG00000029925	16.1357	20.305	21.7941	17.0447	10.5184	4.19589	2.0241	0.755359	0.00381695	0.0268987	Tbxas1	6	38875404	39084585	+	9094	protein_coding	thromboxane A synthase 1, platelet [Source:MGI Symbol;Acc:MGI:98497]	-	14	22	22	19	11	4	2	0.470246	0.624626	0.702631	0.520855	0.296735	0.118369	0.0556444
ENSMUSG00000059883	63.3901	48.9166	53.4946	52.0312	22.9492	29.3712	29.3495	0.754811	0.00074288	0.00749157	Irak4	15	94543643	94581815	+	5021	protein_coding	interleukin-1 receptor-associated kinase 4 [Source:MGI Symbol;Acc:MGI:2182474]	-	55	53	54	58	24	28	29	1.51076	1.23058	1.41037	1.30025	0.529447	0.677597	0.65982
ENSMUSG00000025351	889.766	1041.09	1168.96	982.314	662.658	590.572	504.001	0.754575	6.91718e-10	3.22939e-08	Cd63	10	128900989	128912822	+	3682	protein_coding	CD63 antigen [Source:MGI Symbol;Acc:MGI:99529]	-	772	1128	1180	1095	693	563	498	43.1255	53.2631	62.6768	49.9226	31.0906	27.7081	23.0431
ENSMUSG00000008398	195.933	172.593	215.96	209.022	91.7967	113.289	127.518	0.752666	2.57595e-06	5.85388e-05	Elk3	10	93247414	93311135	-	4550	protein_coding	ELK3, member of ETS oncogene family [Source:MGI Symbol;Acc:MGI:101762]	ETS	170	187	218	233	96	108	126	6.50749	6.05071	7.93467	7.27925	2.95131	3.64225	3.99512
ENSMUSG00000006519	66.8477	89.5267	92.1296	74.4585	54.5043	40.9099	28.3374	0.751927	0.000533542	0.00574028	Cyba	8	122424776	122432930	-	1039	protein_coding	cytochrome b-245, alpha polypeptide [Source:MGI Symbol;Acc:MGI:1316658]	-	58	97	93	83	57	39	28	5.73122	8.10198	8.73796	6.69365	4.52348	3.39519	2.29177
ENSMUSG00000091230	23.0509	23.0739	30.7099	25.1185	8.60594	12.5877	10.1205	0.75177	0.00346194	0.0250151	Gm6970	19	47170469	47171134	-	666	protein_coding	predicted gene 6970 [Source:MGI Symbol;Acc:MGI:3645322]	-	20	25	31	28	9	12	10	2.04156	2.15712	3.00887	2.33269	0.737827	1.07918	0.845528
ENSMUSG00000072941	91.0512	144.904	42.5976	141.74	62.154	25.1754	50.6025	0.751675	0.00282793	0.0215576	Sod3	5	52363791	52371418	+	3738	protein_coding	superoxide dismutase 3, extracellular [Source:MGI Symbol;Acc:MGI:103181]	-	79	157	43	158	65	24	50	1.4368	2.41362	0.743609	2.34526	0.949424	0.384557	0.753239
ENSMUSG00000024349	24.2035	21.228	18.8222	20.6331	8.60594	8.39178	7.08435	0.751642	0.00389167	0.0273099	Tmem173	18	35733678	35740554	-	2302	protein_coding	transmembrane protein 173 [Source:MGI Symbol;Acc:MGI:1919762]	-	21	23	19	23	9	8	7	0.620185	0.574157	0.533536	0.554365	0.213463	0.208148	0.171236
ENSMUSG00000037211	150.984	163.363	187.231	160.579	100.403	93.3586	84.0002	0.750157	2.88243e-06	6.48492e-05	Spry1	3	37639947	37644598	+	2906	protein_coding	sprouty RTK signaling antagonist 1 [Source:MGI Symbol;Acc:MGI:1345139]	-	131	177	189	179	105	89	83	3.46804	3.96083	4.75754	3.86751	2.23244	2.07579	1.82006
ENSMUSG00000026728	2584.01	2502.13	2616.28	2508.27	1710.67	1433.95	1319.71	0.750069	1.45399e-14	1.56901e-12	Vim	2	13573927	13582826	+	4743	protein_coding	vimentin [Source:MGI Symbol;Acc:MGI:98932]	-	2242	2711	2641	2796	1789	1367	1304	102.433	104.697	114.731	104.258	65.6438	55.0243	49.3488
ENSMUSG00000019789	356.137	298.115	428.948	391.131	247.66	172.032	201.398	0.749696	1.30712e-06	3.24458e-05	Hey2	10	30832359	30842801	-	4593	protein_coding	hairy/enhancer-of-split related with YRPW motif 2 [Source:MGI Symbol;Acc:MGI:1341884]	bHLH	309	323	433	436	259	164	199	8.83393	7.80546	11.7704	10.173	5.94668	4.13067	4.71242
ENSMUSG00000016496	82.9834	63.6839	66.373	89.709	32.5113	40.9099	44.5302	0.749244	0.000399508	0.00452516	Cd274	19	29367455	29388095	+	3622	protein_coding	CD274 antigen [Source:MGI Symbol;Acc:MGI:1926446]	-	72	69	67	100	34	39	44	1.35142	1.09473	1.19575	1.53188	0.512527	0.644918	0.68408
ENSMUSG00000046959	41.4917	26.7657	23.7754	20.6331	10.5184	14.6856	8.0964	0.749145	0.00381811	0.0268987	Slc26a1	5	108669878	108675569	-	4050	protein_coding	solute carrier family 26 (sulfate transporter), member 1 [Source:MGI Symbol;Acc:MGI:2385894]	-	36	29	24	23	11	14	8	0.869733	0.592218	0.551318	0.4535	0.21343	0.297984	0.160091
ENSMUSG00000046402	238.577	395.025	414.088	290.657	223.755	181.472	141.687	0.748727	4.88611e-05	0.000767009	Rbp1	9	98422961	98446575	+	2652	protein_coding	retinol binding protein 1, cellular [Source:MGI Symbol;Acc:MGI:97876]	-	207	428	418	324	234	173	140	5.30645	9.27424	10.1887	6.77868	4.81758	3.90716	2.97274
ENSMUSG00000032487	21.8984	11.9984	21.7941	17.9418	4.78108	3.14692	9.10845	0.748478	0.00419692	0.0288895	Ptgs2	1	150100031	150108227	+	4580	protein_coding	prostaglandin-endoperoxide synthase 2 [Source:MGI Symbol;Acc:MGI:97798]	-	19	13	22	20	5	3	9	0.537089	0.310625	0.59132	0.461411	0.113512	0.0747128	0.210732
ENSMUSG00000031995	18.4408	12.9214	21.7941	11.6622	3.82486	7.34281	2.0241	0.747318	0.0039527	0.0276092	St14	9	31089402	31131853	-	7637	protein_coding	suppression of tumorigenicity 14 (colon carcinoma) [Source:MGI Symbol;Acc:MGI:1338881]	-	16	14	22	13	4	7	2	0.55954	0.413847	0.731546	0.37104	0.112344	0.21567	0.0579343
ENSMUSG00000031565	901.292	850.042	838.082	943.739	498.188	521.34	531.326	0.746928	3.21507e-15	3.81176e-13	Fgfr1	8	25513654	25575718	+	9875	protein_coding	fibroblast growth factor receptor 1 [Source:MGI Symbol;Acc:MGI:95522]	-	782	921	846	1052	521	497	525	23.5863	23.4808	24.2623	25.8962	12.6203	13.2066	13.1162
ENSMUSG00000042228	68.0003	59.0691	41.6069	61.8992	33.4676	24.1264	28.3374	0.746148	0.00104799	0.00990863	Lyn	4	3678115	3813122	+	4073	protein_coding	LYN proto-oncogene, Src family tyrosine kinase [Source:MGI Symbol;Acc:MGI:96892]	-	59	64	42	69	35	23	28	1.95186	1.78968	1.32115	1.86299	0.929914	0.670355	0.767271
ENSMUSG00000029605	13.8306	32.3034	52.504	38.5749	17.2119	12.5877	9.10845	0.746142	0.00422973	0.0290266	Oas1b	5	120812635	120824163	+	1992	polymorphic_pseudogene	2'-5' oligoadenylate synthetase 1B [Source:MGI Symbol;Acc:MGI:97430]	-	12	35	53	43	18	12	9	0.578999	1.42746	2.43153	1.69329	0.697506	0.510104	0.359695
ENSMUSG00000035095	27.6611	40.61	39.6256	40.3691	11.4746	22.0284	17.2049	0.746023	0.00263521	0.0203032	Fam167a	14	63436394	63465498	+	4274	protein_coding	family with sequence similarity 167, member A [Source:MGI Symbol;Acc:MGI:3606565]	-	24	44	40	45	12	21	17	0.709708	1.09982	1.1247	1.08604	0.284989	0.547103	0.416402
ENSMUSG00000038173	9.22038	13.8443	30.7099	8.9709	2.86865	3.14692	4.0482	0.745261	0.00331754	0.0242635	Enpp6	8	46986887	47096762	+	6412	protein_coding	ectonucleotide pyrophosphatase/phosphodiesterase 6 [Source:MGI Symbol;Acc:MGI:2445171]	-	8	15	31	10	3	3	4	0.325283	0.515541	1.19851	0.331846	0.0979651	0.107467	0.134718
ENSMUSG00000010358	110.645	131.983	147.606	110.342	61.1978	79.722	64.7712	0.745155	4.89106e-05	0.000767118	Ifi35	11	101448407	101458698	+	1727	protein_coding	interferon-induced protein 35 [Source:MGI Symbol;Acc:MGI:1917360]	-	96	143	149	123	64	76	64	5.59732	7.04767	8.26044	5.85302	2.99687	3.90394	3.09089
ENSMUSG00000021057	218.984	182.745	223.885	252.082	102.315	135.318	132.579	0.744436	3.55279e-06	7.88483e-05	Akap5	12	76324891	76334153	+	6824	protein_coding	A kinase (PRKA) anchor protein 5 [Source:MGI Symbol;Acc:MGI:2685104]	-	190	198	226	281	107	129	131	2.40944	2.1224	2.72507	2.90827	1.08974	1.44123	1.37603
ENSMUSG00000032172	707.664	701.446	736.046	661.156	470.458	402.806	348.145	0.742917	1.84406e-10	9.54939e-09	Olfm2	9	20667690	20746349	-	2665	protein_coding	olfactomedin 2 [Source:MGI Symbol;Acc:MGI:3045350]	-	614	760	743	737	492	384	344	26.6553	27.8888	30.6699	26.1125	17.1538	14.6868	12.37
ENSMUSG00000020080	391.866	354.415	485.414	343.586	212.28	249.656	212.531	0.74148	2.74257e-07	7.87003e-06	Hkdc1	10	62383137	62422491	-	5132	protein_coding	hexokinase domain containing 1 [Source:MGI Symbol;Acc:MGI:2384910]	-	340	384	490	383	222	238	210	14.5833	13.9223	19.984	13.4074	7.64733	8.99366	7.46092
ENSMUSG00000087042	28.8137	41.533	51.5133	44.8545	18.1681	20.9795	20.241	0.74019	0.00222146	0.0177924	Gm11611	11	97519612	97521895	-	1326	sense_intronic	predicted gene 11611 [Source:MGI Symbol;Acc:MGI:3707011]	-	25	45	52	50	19	20	20	1.28175	1.95019	2.53498	2.09218	0.782342	0.903389	0.849354
ENSMUSG00000055980	734.172	477.168	684.533	719.467	309.814	313.643	476.676	0.739246	8.22948e-06	0.000164053	Irs1	1	82233101	82291416	-	9144	protein_coding	insulin receptor substrate 1 [Source:MGI Symbol;Acc:MGI:99454]	-	637	517	691	802	324	299	471	4.73599	3.24909	4.88492	4.86644	1.93462	1.9585	2.90059
ENSMUSG00000032269	44.9493	57.2232	60.4291	62.7963	34.4238	19.9305	30.3615	0.738915	0.00120046	0.0110601	Htr3a	9	48899213	48911099	-	2083	protein_coding	5-hydroxytryptamine (serotonin) receptor 3A [Source:MGI Symbol;Acc:MGI:96282]	-	39	62	61	70	36	19	30	1.30353	1.75166	1.93863	1.9095	0.966358	0.559489	0.830563
ENSMUSG00000029713	1907.47	2180.02	2980.84	2163.78	1525.16	1328	1115.28	0.738861	1.90337e-07	5.72632e-06	Gnb2	5	137528127	137533510	-	3402	protein_coding	guanine nucleotide binding protein (G protein), beta 2 [Source:MGI Symbol;Acc:MGI:95784]	-	1655	2362	3009	2412	1595	1266	1102	97.5834	117.722	168.697	116.07	75.5297	65.7647	53.8214
ENSMUSG00000101337	146.373	167.978	184.259	160.579	65.0227	91.2607	116.386	0.738676	5.25114e-05	0.000811585	Dnah7c	1	46425592	46807476	+	12603	protein_coding	dynein, axonemal, heavy chain 7C [Source:MGI Symbol;Acc:MGI:3639762]	-	127	182	186	179	68	87	115	2.93473	3.55498	4.08682	3.37586	1.26198	1.77119	2.20119
ENSMUSG00000024235	34.5764	36.9182	67.3636	35.8836	13.387	25.1754	20.241	0.738354	0.00323282	0.0238569	Map3k8	18	4331327	4353015	-	4504	protein_coding	mitogen-activated protein kinase kinase kinase 8 [Source:MGI Symbol;Acc:MGI:1346878]	-	30	40	68	40	14	24	20	1.12494	1.26786	2.42452	1.22415	0.421616	0.79287	0.621204
ENSMUSG00000026628	178.645	223.355	246.67	213.508	117.615	130.073	120.434	0.738349	1.41736e-06	3.47041e-05	Atf3	1	191170296	191218039	-	2154	protein_coding	activating transcription factor 3 [Source:MGI Symbol;Acc:MGI:109384]	TF_bZIP	155	242	249	238	123	124	119	7.17327	9.46676	10.957	8.98936	4.57162	5.05578	4.56171
ENSMUSG00000026946	107.187	88.6037	89.1577	97.7829	51.6357	59.7915	44.5302	0.738319	0.000113802	0.0015703	Nmi	2	51948487	51973494	-	2001	protein_coding	N-myc (and STAT) interactor [Source:MGI Symbol;Acc:MGI:1928368]	-	93	96	90	109	54	57	44	7.22574	6.3048	6.6489	6.91181	3.36955	3.90171	2.8317
ENSMUSG00000031548	116.407	209.511	77.27	101.371	69.8038	58.7425	60.723	0.736671	0.00134568	0.0120589	Sfrp1	8	23411502	23449632	+	4372	protein_coding	secreted frizzled-related protein 1 [Source:MGI Symbol;Acc:MGI:892014]	-	101	227	78	113	73	56	60	1.57054	2.98369	1.15327	1.43407	0.911652	0.767179	0.772811
ENSMUSG00000071350	398.781	350.723	434.891	439.574	197.937	237.068	267.181	0.736579	7.71161e-08	2.54526e-06	Setdb2	14	59402009	59440884	-	4047	protein_coding	SET domain, bifurcated 2 [Source:MGI Symbol;Acc:MGI:2685139]	MBD	346	380	439	490	207	226	264	13.1705	12.2267	15.8891	15.2226	6.32813	7.57906	8.32386
ENSMUSG00000039616	44.9493	43.3789	44.5789	34.0894	29.6427	15.7346	11.1326	0.735722	0.00315521	0.0234378	Mocos	18	24653691	24701556	+	2884	protein_coding	molybdenum cofactor sulfurase [Source:MGI Symbol;Acc:MGI:1915841]	-	39	47	45	38	31	15	11	0.919341	0.936506	1.00863	0.731075	0.586885	0.311519	0.214783
ENSMUSG00000029096	64.5426	59.9921	64.3917	85.2236	38.2486	44.0569	22.2651	0.735239	0.00109337	0.0102469	Htra3	5	35652023	35679782	-	4439	protein_coding	HtrA serine peptidase 3 [Source:MGI Symbol;Acc:MGI:1925808]	-	56	65	65	95	40	42	22	2.99772	2.94115	3.30845	4.15043	1.71966	1.98077	0.975487
ENSMUSG00000060550	50.7121	43.3789	69.3449	69.9731	31.5551	29.3712	27.3254	0.734659	0.00126176	0.0115013	H2-Q7	17	35439155	35443773	+	4265	protein_coding	histocompatibility 2, Q region locus 7 [Source:MGI Symbol;Acc:MGI:95936]	-	44	47	70	78	33	28	27	1.64357	1.484	2.48623	2.37792	0.989986	0.921457	0.8354
ENSMUSG00000033542	122.17	113.524	108.971	114.828	44.9421	48.2528	90.0725	0.733887	0.000381223	0.00434407	Arhgef5	6	43265582	43289320	+	9977	protein_coding	Rho guanine nucleotide exchange factor (GEF) 5 [Source:MGI Symbol;Acc:MGI:1858952]	-	106	123	110	128	47	46	89	3.15237	3.09198	3.11051	3.10676	1.12256	1.20523	2.19238
ENSMUSG00000033207	116.407	83.066	98.0735	109.445	58.3292	54.5466	53.6387	0.733874	0.000112614	0.0015563	Mamdc2	19	23302609	23448322	-	3338	protein_coding	MAM domain containing 2 [Source:MGI Symbol;Acc:MGI:1918988]	-	101	90	99	122	61	52	53	2.05704	1.5494	1.91719	2.0279	0.997769	0.933051	0.894112
ENSMUSG00000029090	399.934	343.339	268.464	387.543	208.455	154.199	229.735	0.733374	7.01174e-06	0.000141658	Adgra3	5	49959956	50059006	-	8113	protein_coding	adhesion G protein-coupled receptor A3 [Source:MGI Symbol;Acc:MGI:1917943]	-	347	372	271	432	218	147	227	16.9716	15.3793	12.6029	17.2442	8.56304	6.33419	9.19631
ENSMUSG00000028028	149.831	96.9103	125.811	91.5032	66.9351	59.7915	60.723	0.732798	0.000205402	0.00259394	Alpk1	3	127670310	127780527	-	6868	protein_coding	alpha-kinase 1 [Source:MGI Symbol;Acc:MGI:1918731]	-	130	105	127	102	70	57	60	3.04023	2.07564	2.82406	1.94683	1.31474	1.17441	1.16227
ENSMUSG00000038167	41.4917	38.7641	44.5789	56.5167	31.5551	19.9305	10.1205	0.732777	0.00334077	0.0243544	Plekhg6	6	125362660	125380793	-	3299	protein_coding	pleckstrin homology domain containing, family G (with RhoGef domain) member 6 [Source:MGI Symbol;Acc:MGI:2682298]	-	36	42	45	63	33	19	10	0.74187	0.731602	0.88175	1.05958	0.546158	0.344953	0.170695
ENSMUSG00000029781	410.307	399.64	385.359	465.59	248.616	223.431	255.037	0.731954	2.05194e-09	8.82532e-08	Fkbp9	6	56832059	56879358	+	3314	protein_coding	FK506 binding protein 9 [Source:MGI Symbol;Acc:MGI:1350921]	-	356	433	389	519	260	213	252	13.6045	13.9868	14.1348	16.1869	7.97965	7.17121	7.97677
ENSMUSG00000022488	80.6783	63.6839	85.1951	72.6643	40.1611	48.2528	31.3736	0.731365	0.0005016	0.00544866	Nckap1l	15	103453794	103498810	+	5935	protein_coding	NCK associated protein 1 like [Source:MGI Symbol;Acc:MGI:1926063]	-	70	69	86	81	42	46	31	1.24513	1.03745	1.45453	1.17589	0.599991	0.720868	0.456745
ENSMUSG00000034116	10.3729	28.6116	11.8877	25.1185	7.64973	4.19589	5.06025	0.730896	0.00497402	0.0330885	Vav1	17	57279100	57328031	+	3688	protein_coding	vav 1 oncogene [Source:MGI Symbol;Acc:MGI:98923]	-	9	31	12	28	8	4	5	0.298031	0.867722	0.37784	0.756733	0.212759	0.116697	0.137146
ENSMUSG00000083397	895.529	719.905	828.176	945.533	446.553	548.613	491.857	0.73078	1.11079e-09	4.96715e-08	Gm5466	2	181896823	181898712	+	1890	processed_pseudogene	predicted gene 5466 [Source:MGI Symbol;Acc:MGI:3647828]	-	777	780	836	1054	467	523	486	27.949	23.716	28.593	30.9423	13.4909	16.574	14.4803
ENSMUSG00000026185	1506.38	1401.97	952.006	1179.67	664.57	689.175	824.821	0.730738	2.79746e-07	8.0148e-06	Igfbp5	1	72857932	72874884	-	6006	protein_coding	insulin-like growth factor binding protein 5 [Source:MGI Symbol;Acc:MGI:96440]	-	1307	1519	961	1315	695	657	815	17.2769	16.9726	12.0788	14.1867	7.37827	7.65134	8.92367
ENSMUSG00000060961	450.646	484.552	259.548	305.011	195.068	193.011	234.796	0.730683	6.24228e-05	0.000941356	Slc4a4	5	88886818	89239653	+	10815	protein_coding	solute carrier family 4 (anion exchanger), member 4 [Source:MGI Symbol;Acc:MGI:1927555]	-	391	525	262	340	204	184	232	9.58593	10.8797	6.10755	6.80303	4.01667	3.97426	4.7113
ENSMUSG00000029759	40.3391	32.3034	11.8877	31.3982	13.387	12.5877	5.06025	0.730359	0.00528616	0.034603	Pon3	6	5220852	5256286	-	3385	protein_coding	paraoxonase 3 [Source:MGI Symbol;Acc:MGI:106686]	-	35	35	12	35	14	12	5	2.1514	1.81853	0.701361	1.75585	0.691129	0.649852	0.254576
ENSMUSG00000038068	1644.68	1459.19	1495.87	1540.3	906.493	872.746	955.376	0.730317	2.25799e-17	3.53836e-15	Rnf144b	13	47122656	47247991	+	4936	protein_coding	ring finger protein 144B [Source:MGI Symbol;Acc:MGI:2384986]	-	1427	1581	1510	1717	948	832	944	24.9263	23.3436	25.0795	24.4777	13.2991	12.8038	13.6585
ENSMUSG00000107881	43.7968	46.1478	18.8222	32.2953	16.2557	11.5387	17.2049	0.73031	0.00434367	0.0296729	Gm44250	6	5216258	5220486	-	4229	TEC	predicted gene, 44250 [Source:MGI Symbol;Acc:MGI:5690642]	-	38	50	19	36	17	11	17	0.610876	0.679423	0.290423	0.472322	0.219481	0.155791	0.226367
ENSMUSG00000052631	8.06783	13.8443	12.8783	8.9709	2.86865	2.09795	1.01205	0.730059	0.00342937	0.0248295	Sh2d6	6	72513644	72521634	-	1737	protein_coding	SH2 domain containing 6 [Source:MGI Symbol;Acc:MGI:1918380]	-	7	15	13	10	3	2	1	0.536515	0.971797	0.947404	0.625532	0.184665	0.13505	0.0634861
ENSMUSG00000103047	28.8137	43.3789	36.6537	19.736	18.1681	6.29384	14.1687	0.729589	0.00491894	0.0327463	Gm37310	15	8652106	8655073	-	2968	TEC	predicted gene, 37310 [Source:MGI Symbol;Acc:MGI:5610538]	-	25	47	37	22	19	6	14	0.572642	0.910001	0.805848	0.411275	0.349523	0.121081	0.265623
ENSMUSG00000029070	106.034	131.983	85.1951	84.3265	68.8475	53.4976	38.4579	0.729126	0.000614758	0.00644852	Mxra8	4	155839680	155844088	+	2918	protein_coding	matrix-remodelling associated 8 [Source:MGI Symbol;Acc:MGI:1922011]	-	92	143	86	94	72	51	38	6.83556	8.98096	6.07565	5.70007	4.29633	3.33839	2.33865
ENSMUSG00000095288	10.3729	13.8443	26.7473	19.736	5.7373	3.14692	7.08435	0.728322	0.005175	0.0340982	Gm7618	6	148900968	148901138	-	171	processed_pseudogene	predicted pseudogene 7618 [Source:MGI Symbol;Acc:MGI:3644742]	-	9	15	27	22	6	3	7	3.57811	5.04084	10.2066	7.13839	1.91576	1.05078	2.30518
ENSMUSG00000109598	10.3729	11.0755	17.8315	16.1476	0.956216	4.19589	5.06025	0.727596	0.00448167	0.030497	Gm36356	7	135486029	135491315	+	2277	lincRNA	predicted gene, 36356 [Source:MGI Symbol;Acc:MGI:5595515]	-	9	12	18	18	1	4	5	0.268712	0.302849	0.511005	0.438614	0.0239786	0.105217	0.123654
ENSMUSG00000047793	964.682	1108.47	470.555	1111.5	472.371	357.7	494.893	0.72635	0.00255775	0.019817	Sned1	1	93235841	93301065	+	9491	protein_coding	sushi, nidogen and EGF-like domains 1 [Source:MGI Symbol;Acc:MGI:3045960]	-	837	1201	475	1239	494	341	489	20.6994	25.1059	11.1695	25.0075	9.81157	7.42965	10.017
ENSMUSG00000040613	78.3732	35.0723	91.139	51.1342	38.2486	19.9305	30.3615	0.724845	0.0034495	0.0249452	Apobec1	6	122577792	122602444	-	2702	protein_coding	apolipoprotein B mRNA editing enzyme, catalytic polypeptide 1 [Source:MGI Symbol;Acc:MGI:103298]	-	68	38	92	57	40	19	30	4.28445	2.02381	5.51165	2.93107	2.02407	1.05468	1.56568
ENSMUSG00000024621	308.883	272.272	238.745	261.053	152.038	143.709	173.061	0.724513	3.63555e-07	1.00178e-05	Csf1r	18	61105572	61132149	+	4885	protein_coding	colony stimulating factor 1 receptor [Source:MGI Symbol;Acc:MGI:1339758]	-	268	295	241	291	159	137	171	4.25198	3.95621	3.63565	3.76804	2.02597	1.91495	2.24723
ENSMUSG00000022032	49.5595	44.3019	68.3542	60.1051	28.6865	26.2243	30.3615	0.723889	0.00137754	0.0122955	Scara5	14	65666403	65764826	+	6093	protein_coding	scavenger receptor class A, member 5 [Source:MGI Symbol;Acc:MGI:1918395]	-	43	48	69	67	30	25	30	0.857026	0.808663	1.30762	1.08985	0.480204	0.438982	0.49527
ENSMUSG00000007041	273.154	337.802	365.547	315.776	218.973	176.227	164.964	0.723551	7.30421e-07	1.87773e-05	Clic1	17	35049966	35058749	+	1799	protein_coding	chloride intracellular channel 1 [Source:MGI Symbol;Acc:MGI:2148924]	-	237	366	369	352	229	168	163	13.9621	18.2257	20.6698	16.9243	10.8347	8.71951	7.95397
ENSMUSG00000035441	210.916	190.129	162.465	225.17	104.228	105.946	127.518	0.721924	8.27766e-06	0.000164831	Myo1d	11	80482126	80780025	-	6465	protein_coding	myosin ID [Source:MGI Symbol;Acc:MGI:107728]	-	183	206	164	251	109	101	126	3.41976	3.25396	2.91405	3.82811	1.63588	1.66283	1.95034
ENSMUSG00000025647	199.391	203.05	242.707	208.125	154.907	98.6035	109.301	0.721813	1.56704e-05	0.000286115	Shisa5	9	109038565	109057777	+	3297	protein_coding	shisa family member 5 [Source:MGI Symbol;Acc:MGI:1915044]	-	173	220	245	232	162	94	108	14.8127	15.9225	19.9462	16.2122	11.1399	7.09081	7.65959
ENSMUSG00000027952	680.003	996.792	1123.39	800.205	633.015	474.136	436.194	0.721752	7.15174e-06	0.000144163	Pmvk	3	89454541	89469013	+	1713	protein_coding	phosphomevalonate kinase [Source:MGI Symbol;Acc:MGI:1915853]	-	590	1080	1134	892	662	452	431	40.3122	62.3747	73.6725	49.7411	36.3263	27.2085	24.3925
ENSMUSG00000022243	14.9831	11.0755	8.91577	9.868	2.86865	2.09795	2.0241	0.7215	0.00422489	0.0290045	Slc45a2	15	11000721	11029233	+	2983	protein_coding	solute carrier family 45, member 2 [Source:MGI Symbol;Acc:MGI:2153040]	-	13	12	9	11	3	2	2	0.296277	0.231172	0.195031	0.204603	0.0549104	0.0401574	0.0377554
ENSMUSG00000006403	103.729	64.6069	77.27	73.5614	22.9492	47.2038	51.6146	0.720578	0.00164164	0.0140275	Adamts4	1	171250421	171260637	+	4810	protein_coding	a disintegrin-like and metallopeptidase (reprolysin type) with thrombospondin type 1 motif, 4 [Source:MGI Symbol;Acc:MGI:1339949]	-	90	70	78	82	24	45	51	1.46447	0.962803	1.20682	1.08898	0.313638	0.645108	0.687391
ENSMUSG00000002325	452.951	490.089	610.235	583.109	315.551	319.937	305.639	0.72024	1.60224e-08	5.88065e-07	Irf9	14	55603571	55610030	+	5386	protein_coding	interferon regulatory factor 9 [Source:MGI Symbol;Acc:MGI:107587]	IRF	393	531	616	650	330	305	302	13.6176	15.5526	20.2954	18.3818	9.18335	9.31085	8.66783
ENSMUSG00000046191	670.782	485.475	514.143	529.283	277.303	351.406	333.977	0.719239	1.34024e-07	4.18587e-06	Pcdhb20	18	37504264	37507822	+	3559	protein_coding	protocadherin beta 20 [Source:MGI Symbol;Acc:MGI:2136758]	-	582	526	519	590	290	335	330	11.1174	8.49309	9.42659	9.19809	4.44894	5.63774	5.22142
ENSMUSG00000060703	102.577	115.369	112.933	112.136	65.0227	71.3302	49.5905	0.718766	8.70444e-05	0.00124494	Cd302	2	60251993	60284488	-	1354	protein_coding	CD302 antigen [Source:MGI Symbol;Acc:MGI:1913455]	-	89	125	114	125	68	68	49	4.63646	5.50437	5.64689	5.31463	2.84502	3.12095	2.1144
ENSMUSG00000032515	49.5595	77.5283	86.1858	61.0022	27.7303	32.5182	45.5423	0.718464	0.00156162	0.0135559	Csrnp1	9	119971163	119984658	-	3473	protein_coding	cysteine-serine-rich nuclear protein 1 [Source:MGI Symbol;Acc:MGI:2387989]	-	43	84	87	68	29	31	45	1.62587	2.68471	3.12784	2.09842	0.880632	1.03267	1.40937
ENSMUSG00000020638	405.697	340.571	439.845	397.411	229.492	238.117	230.748	0.718338	1.08765e-08	4.10054e-07	Cmpk2	12	26469204	26479837	+	4163	protein_coding	cytidine monophosphate (UMP-CMP) kinase 2, mitochondrial [Source:MGI Symbol;Acc:MGI:99830]	-	352	369	444	443	240	227	228	12.9704	11.4931	15.5561	13.3223	7.10234	7.36916	6.9589
ENSMUSG00000115100	11.5255	20.305	25.7567	22.4273	4.78108	6.29384	10.1205	0.71758	0.00615014	0.038793	Gm34934	14	46866576	46882757	-	4686	lincRNA	predicted gene, 34934 [Source:MGI Symbol;Acc:MGI:5594093]	-	10	22	26	25	5	6	10	0.33589	0.624626	0.830382	0.685335	0.134879	0.177554	0.278222
ENSMUSG00000017057	34.5764	17.5362	29.7192	41.2662	16.2557	10.4897	12.1446	0.717542	0.00535892	0.0349483	Il13ra1	X	36112110	36171259	+	3712	protein_coding	interleukin 13 receptor, alpha 1 [Source:MGI Symbol;Acc:MGI:105052]	-	30	19	30	46	17	10	12	0.549441	0.29414	0.522431	0.68758	0.25005	0.161354	0.182044
ENSMUSG00000034616	345.764	390.41	421.022	267.333	244.791	197.207	166.988	0.717503	1.52738e-05	0.000279725	Ssh3	19	4261668	4269172	-	2740	protein_coding	slingshot protein phosphatase 3 [Source:MGI Symbol;Acc:MGI:2683546]	-	300	423	425	298	256	188	165	7.46805	8.90075	10.0596	6.05436	5.11805	4.12311	3.40224
ENSMUSG00000056501	69.1528	107.063	128.783	104.96	55.4605	63.9874	46.5543	0.717233	0.000557719	0.00594362	Cebpb	2	167688915	167690418	+	1504	protein_coding	CCAAT/enhancer binding protein (C/EBP), beta [Source:MGI Symbol;Acc:MGI:88373]	C/EBP	60	116	130	117	58	61	46	2.71213	4.43219	5.58741	4.3163	2.10555	2.42924	1.72231
ENSMUSG00000017978	243.187	191.052	215.96	243.112	123.352	139.513	125.494	0.716142	1.54824e-06	3.72507e-05	Cadps2	6	23262773	23839421	-	9566	protein_coding	Ca2+-dependent activator protein for secretion 2 [Source:MGI Symbol;Acc:MGI:2443963]	-	211	207	218	271	129	133	124	4.03053	3.34234	3.95953	4.22488	1.97901	2.23827	1.96199
ENSMUSG00000032845	436.815	392.256	426.966	435.986	161.6	287.419	279.326	0.715978	1.00797e-05	0.000196163	Alpk2	18	65265529	65393888	-	7782	protein_coding	alpha-kinase 2 [Source:MGI Symbol;Acc:MGI:2449492]	-	379	425	431	486	169	274	276	5.90286	5.59516	6.38276	6.17768	2.11392	3.75971	3.56063
ENSMUSG00000036353	69.1528	82.143	49.5321	61.0022	46.8546	18.8815	31.3736	0.71549	0.00253643	0.0196939	P2ry12	3	59216272	59262871	-	2546	protein_coding	purinergic receptor P2Y, G-protein coupled 12 [Source:MGI Symbol;Acc:MGI:1918089]	-	60	89	50	68	49	18	31	2.15367	2.70034	1.7065	1.99206	1.41255	0.569221	0.921688
ENSMUSG00000023484	86.441	124.599	196.147	144.432	81.2783	69.2322	71.8556	0.715046	0.000665973	0.00688949	Prph	15	99055174	99058978	+	1999	protein_coding	peripherin [Source:MGI Symbol;Acc:MGI:97774]	-	75	135	198	161	85	66	71	3.47094	5.28105	8.71282	6.08104	3.15925	2.69098	2.72169
ENSMUSG00000110071	21.8984	33.2264	30.7099	32.2953	3.82486	14.6856	17.2049	0.714689	0.00605351	0.0383997	Gm45512	8	45920872	45922424	+	1553	TEC	predicted gene 45512 [Source:MGI Symbol;Acc:MGI:5791348]	-	19	36	31	36	4	14	17	0.831744	1.33211	1.29034	1.28619	0.140629	0.53994	0.616424
ENSMUSG00000020573	19.5933	16.6132	22.7847	27.8098	9.56216	10.4897	5.06025	0.713208	0.00634295	0.0397173	Pik3cg	12	32173473	32208659	-	8426	protein_coding	phosphatidylinositol-4,5-bisphosphate 3-kinase catalytic subunit gamma [Source:MGI Symbol;Acc:MGI:1353576]	-	17	18	23	31	10	10	5	0.306316	0.274153	0.394055	0.455878	0.14471	0.158746	0.0746252
ENSMUSG00000015852	23.0509	26.7657	37.6444	55.6196	14.3432	14.6856	18.2169	0.712669	0.00531699	0.0347669	Fcrls	3	87250758	87263738	-	2334	protein_coding	Fc receptor-like S, scavenger receptor [Source:MGI Symbol;Acc:MGI:1933397]	-	20	29	38	62	15	14	18	0.918084	1.12525	1.65861	2.32279	0.552997	0.566189	0.684415
ENSMUSG00000000365	18.4408	9.22955	11.8877	20.6331	1.91243	4.19589	6.0723	0.712649	0.0056646	0.0365884	Rnf17	14	56402581	56525032	+	6241	protein_coding	ring finger protein 17 [Source:MGI Symbol;Acc:MGI:1353419]	-	16	10	12	23	2	4	6	0.525227	0.277478	0.374556	0.616199	0.0527274	0.115683	0.163145
ENSMUSG00000038816	553.223	526.085	553.768	548.122	320.332	354.553	301.591	0.712413	2.31054e-11	1.40196e-09	Ctnnal1	4	56810935	56865188	-	7661	protein_coding	catenin (cadherin associated protein), alpha-like 1 [Source:MGI Symbol;Acc:MGI:1859649]	-	480	570	559	611	335	338	298	22.3509	22.4352	24.7499	23.22	12.5279	13.866	11.4939
ENSMUSG00000010751	56.4748	36.9182	32.6912	35.8836	14.3432	22.0284	21.2531	0.712084	0.00380101	0.0268304	Tnfrsf22	7	143634806	143649661	-	4217	protein_coding	tumor necrosis factor receptor superfamily, member 22 [Source:MGI Symbol;Acc:MGI:1930270]	-	49	40	33	40	15	21	21	1.51213	1.04341	0.968311	1.00744	0.37176	0.570944	0.536793
ENSMUSG00000044217	50.7121	70.1446	101.045	75.3556	49.7232	38.812	24.2892	0.71192	0.00225622	0.0179862	Aqp5	15	99590782	99594829	+	2599	protein_coding	aquaporin 5 [Source:MGI Symbol;Acc:MGI:106215]	-	44	76	102	84	52	37	24	2.3628	3.44975	5.20813	3.68145	2.24262	1.75048	1.06753
ENSMUSG00000028339	88.7461	79.3742	95.1015	93.2974	63.1102	44.0569	38.4579	0.711714	0.000439251	0.00486823	Col15a1	4	47208161	47313167	+	6349	protein_coding	collagen, type XV, alpha 1 [Source:MGI Symbol;Acc:MGI:88449]	-	77	86	96	104	66	42	38	2.6914	2.5409	3.19056	2.96679	1.85272	1.29336	1.10019
ENSMUSG00000024659	416.069	570.386	589.431	478.149	317.464	304.202	284.386	0.711478	1.48111e-07	4.57824e-06	Anxa1	19	20373428	20390944	-	2608	protein_coding	annexin A1 [Source:MGI Symbol;Acc:MGI:96819]	-	361	618	595	533	332	290	281	37.6993	54.5526	59.0815	45.4276	27.8448	26.6812	24.3068
ENSMUSG00000003283	13.8306	11.9984	23.7754	17.0447	3.82486	5.24487	7.08435	0.710719	0.00649038	0.0404494	Hck	2	153108468	153151441	+	2092	protein_coding	hemopoietic cell kinase [Source:MGI Symbol;Acc:MGI:96052]	-	12	13	24	19	4	5	7	0.415805	0.380761	0.790729	0.537314	0.111313	0.152637	0.20091
ENSMUSG00000042686	111.797	70.1446	90.1483	110.342	42.0735	41.9589	68.8194	0.710331	0.000941581	0.00907392	Jph1	1	16964560	17097889	-	4998	protein_coding	junctophilin 1 [Source:MGI Symbol;Acc:MGI:1891495]	-	97	76	91	123	44	40	68	2.43248	1.61099	2.16984	2.51738	0.886155	0.883729	1.41248
ENSMUSG00000006445	69.1528	77.5283	118.877	98.68	61.1978	34.6161	48.5784	0.709828	0.00116897	0.0108364	Epha2	4	141301240	141329384	+	4674	protein_coding	Eph receptor A2 [Source:MGI Symbol;Acc:MGI:95278]	-	60	84	120	110	64	33	48	2.75611	3.26156	5.24125	4.12387	2.36105	1.33549	1.82634
ENSMUSG00000025911	92.2038	115.369	82.2232	117.519	69.8038	48.2528	49.5905	0.70893	0.000420756	0.00471545	Adhfe1	1	9547948	9580673	+	3780	protein_coding	alcohol dehydrogenase, iron containing, 1 [Source:MGI Symbol;Acc:MGI:1923437]	-	80	125	83	131	73	46	49	3.31428	4.37733	3.26953	4.42931	2.42885	1.67895	1.68147
ENSMUSG00000055818	29.9662	27.6887	41.6069	41.2662	12.4308	12.5877	23.2772	0.708743	0.00491013	0.0327137	A230083G16Rik	6	124916863	124925844	+	991	antisense	RIKEN cDNA A230083G16 gene [Source:MGI Symbol;Acc:MGI:3045289]	-	26	30	42	46	13	12	23	1.78364	1.73962	2.73962	2.57548	0.716236	0.725264	1.30694
ENSMUSG00000055413	10.3729	19.3821	29.7192	28.7069	9.56216	7.34281	7.08435	0.708275	0.00685024	0.0419892	H2-Q5	17	35394126	35397800	+	1591	polymorphic_pseudogene	histocompatibility 2, Q region locus 5 [Source:MGI Symbol;Acc:MGI:95934]	-	9	21	30	32	10	7	7	0.789493	1.55713	2.50227	2.29098	0.704506	0.540985	0.508626
ENSMUSG00000078954	18.4408	8.3066	12.8783	16.1476	3.82486	5.24487	2.0241	0.707383	0.00593001	0.0378393	Arhgap8	15	84720052	84772207	+	3546	protein_coding	Rho GTPase activating protein 8 [Source:MGI Symbol;Acc:MGI:1920417]	-	16	9	13	18	4	5	2	0.919481	0.437185	0.710353	0.844231	0.184613	0.253148	0.0952023
ENSMUSG00000030847	136.001	91.3726	137.699	130.975	72.6724	67.1343	68.8194	0.707083	0.000147361	0.00195264	Bag3	7	128523616	128546981	+	2562	protein_coding	BCL2-associated athanogene 3 [Source:MGI Symbol;Acc:MGI:1352493]	-	118	99	139	146	76	64	68	3.1312	2.22057	3.50712	3.16189	1.61965	1.4962	1.49462
ENSMUSG00000041959	298.51	431.02	529.002	370.498	274.434	219.235	207.47	0.706345	2.96638e-05	0.000503075	S100a10	3	93555080	93564643	+	1212	protein_coding	S100 calcium binding protein A10 (calpactin) [Source:MGI Symbol;Acc:MGI:1339468]	-	259	467	534	413	287	209	205	29.7934	45.4085	58.4076	38.7736	26.5143	21.181	19.533
ENSMUSG00000037736	2256.69	2082.19	2356.74	2512.75	1285.15	1298.63	1567.67	0.705221	5.49396e-12	3.76451e-10	Limch1	5	66745827	67057158	+	10263	protein_coding	LIM and calponin homology domains 1 [Source:MGI Symbol;Acc:MGI:1924819]	-	1958	2256	2379	2801	1344	1238	1549	61.8842	60.2707	71.494	72.2514	34.115	34.4722	40.5521
ENSMUSG00000054555	57.6273	48.9166	41.6069	44.8545	22.9492	27.2733	24.2892	0.703921	0.00216208	0.0174191	Adam12	7	133883199	134232146	-	10573	protein_coding	a disintegrin and metallopeptidase domain 12 (meltrin alpha) [Source:MGI Symbol;Acc:MGI:105378]	-	50	53	42	50	24	26	24	1.52294	1.36455	1.21638	1.24294	0.587088	0.697698	0.605507
ENSMUSG00000039405	66.8477	74.7594	89.1577	92.4003	38.2486	52.4487	42.5061	0.702452	0.000631853	0.00660477	Prss23	7	89507783	89527187	-	3767	protein_coding	protease, serine 23 [Source:MGI Symbol;Acc:MGI:1923703]	-	58	81	90	103	40	50	42	3.85066	4.54562	5.68143	5.58098	2.13278	2.92455	2.30968
ENSMUSG00000000957	580.884	506.703	477.489	540.946	306.945	315.741	323.856	0.702143	4.12926e-10	2.02761e-08	Mmp14	14	54431612	54445364	+	5960	protein_coding	matrix metallopeptidase 14 (membrane-inserted) [Source:MGI Symbol;Acc:MGI:101900]	-	504	549	482	603	321	301	320	24.1466	22.233	21.9574	23.5781	12.3512	12.7049	12.699
ENSMUSG00000027954	84.1359	120.907	103.027	92.4003	53.5481	67.1343	46.5543	0.701994	0.00037904	0.00432596	Efna1	3	89271733	89281142	-	1830	protein_coding	ephrin A1 [Source:MGI Symbol;Acc:MGI:103236]	-	73	131	104	103	56	64	46	3.29757	5.00199	4.46696	3.79729	2.0316	2.54702	1.72117
ENSMUSG00000031374	82.9834	59.9921	78.2607	61.8992	43.0297	31.4692	39.47	0.70119	0.00101402	0.0096329	Zfp92	X	73411096	73428385	+	6744	protein_coding	zinc finger protein 92 [Source:MGI Symbol;Acc:MGI:108094]	zf-C2H2	72	65	79	69	45	30	39	1.25252	0.955799	1.30674	0.979643	0.628701	0.459785	0.561969
ENSMUSG00000018654	19.5933	20.305	15.8503	43.9574	12.4308	9.44076	5.06025	0.700905	0.00744807	0.0446068	Ikzf1	11	11685003	11772926	+	5777	protein_coding	IKAROS family zinc finger 1 [Source:MGI Symbol;Acc:MGI:1342540]	zf-C2H2	17	22	16	49	13	9	5	0.533578	0.583676	0.477504	1.25519	0.327696	0.24887	0.129991
ENSMUSG00000025017	65.6952	64.6069	76.2794	63.6934	45.8984	34.6161	28.3374	0.700558	0.00109411	0.0102479	Pik3ap1	19	41274218	41385070	-	2615	protein_coding	phosphoinositide-3-kinase adaptor protein 1 [Source:MGI Symbol;Acc:MGI:1933177]	-	57	70	77	71	48	33	28	1.48187	1.53828	1.90342	1.50647	1.0022	0.755842	0.60296
ENSMUSG00000062561	11.5255	22.1509	18.8222	18.8389	7.64973	4.19589	7.08435	0.700263	0.00748906	0.0446946	Gm10118	10	63924866	63927434	-	2569	protein_coding	predicted gene 10118 [Source:MGI Symbol;Acc:MGI:3642340]	-	10	24	19	21	8	4	7	0.264633	0.536853	0.478085	0.453554	0.170025	0.0932576	0.153439
ENSMUSG00000101698	21.8984	36.9182	35.6631	28.7069	5.7373	11.5387	21.2531	0.700002	0.00704602	0.042881	Gm29562	9	88827522	88828425	+	904	lincRNA	predicted gene 29562 [Source:MGI Symbol;Acc:MGI:5580268]	-	19	40	36	32	6	11	21	1.42887	2.54273	2.57424	1.96406	0.362384	0.728807	1.30814
ENSMUSG00000098112	20.7458	30.4575	26.7473	41.2662	12.4308	14.6856	13.1567	0.699829	0.00608867	0.0385385	Bin2	15	100641077	100669553	-	2530	protein_coding	bridging integrator 2 [Source:MGI Symbol;Acc:MGI:3611448]	-	18	33	27	46	13	14	13	1.09163	1.69167	1.55695	2.2768	0.633175	0.748016	0.65304
ENSMUSG00000061048	32.2713	32.3034	28.7286	26.9127	10.5184	11.5387	19.229	0.699207	0.00569665	0.0367559	Cdh3	8	106510891	106557297	+	4384	protein_coding	cadherin 3 [Source:MGI Symbol;Acc:MGI:88356]	-	28	35	29	30	11	11	19	0.434205	0.458781	0.427605	0.379686	0.136996	0.150283	0.244054
ENSMUSG00000022656	1418.79	1232.15	1207.59	1410.23	747.761	710.155	915.906	0.699019	5.81469e-10	2.77948e-08	Nectin3	16	46387706	46498525	-	12747	protein_coding	nectin cell adhesion molecule 3 [Source:MGI Symbol;Acc:MGI:1930171]	-	1231	1335	1219	1572	782	677	905	43.8849	40.2289	41.3208	45.7378	22.3894	21.2631	26.7239
ENSMUSG00000060441	18.4408	19.3821	24.766	21.5302	3.82486	11.5387	9.10845	0.698422	0.00759303	0.0451597	Trim5	7	104263386	104288094	-	3690	protein_coding	tripartite motif-containing 5 [Source:MGI Symbol;Acc:MGI:3646853]	-	16	21	25	24	4	11	9	0.424735	0.471213	0.631024	0.519966	0.085278	0.25726	0.197895
ENSMUSG00000044674	214.374	247.352	220.913	256.568	148.213	120.632	146.747	0.69752	1.64408e-06	3.92423e-05	Fzd1	5	4753839	4758035	-	4197	protein_coding	frizzled class receptor 1 [Source:MGI Symbol;Acc:MGI:1196625]	-	186	268	223	286	155	115	145	3.01288	3.66947	3.43464	3.78095	2.01641	1.64115	1.9455
ENSMUSG00000040152	94.5088	91.3726	85.1951	73.5614	52.5919	37.763	52.6266	0.697512	0.000484553	0.00530184	Thbs1	2	118111876	118127133	+	6073	protein_coding	thrombospondin 1 [Source:MGI Symbol;Acc:MGI:98737]	-	82	99	86	82	55	36	52	1.71371	1.74888	1.70895	1.39863	0.923134	0.662837	0.900164
ENSMUSG00000031207	877.088	690.371	791.522	732.923	485.758	413.295	491.857	0.697418	1.84562e-09	7.99517e-08	Msn	X	96096042	96168552	+	6327	protein_coding	moesin [Source:MGI Symbol;Acc:MGI:97167]	-	761	748	799	817	508	394	486	21.273	17.6745	21.2373	18.6394	11.4048	9.70334	11.2532
ENSMUSG00000031765	441.425	813.124	999.557	600.154	415.954	352.455	162.94	0.697136	0.00683533	0.0419507	Mt1	8	94179082	94180327	+	1246	protein_coding	metallothionein 1 [Source:MGI Symbol;Acc:MGI:97171]	-	383	881	1009	669	435	336	161	34.4873	67.0559	86.3892	49.1646	31.4578	26.6551	12.0083
ENSMUSG00000045136	289.289	328.572	356.631	328.335	245.747	155.248	170.024	0.696481	8.81845e-06	0.000174251	Tubb2b	13	34126748	34130466	-	2294	protein_coding	tubulin, beta 2B class IIB [Source:MGI Symbol;Acc:MGI:1920960]	-	251	356	360	366	257	148	168	13.0659	15.6644	17.8186	15.5493	10.7443	6.78746	7.24383
ENSMUSG00000009378	46.1019	42.456	13.869	48.4429	22.9492	11.5387	11.1326	0.695885	0.00762528	0.0453067	Slc16a12	19	34668403	34747289	-	4051	protein_coding	solute carrier family 16 (monocarboxylic acid transporters), member 12 [Source:MGI Symbol;Acc:MGI:2147716]	-	40	46	14	54	24	11	11	0.671282	0.652535	0.223399	0.739614	0.323471	0.162637	0.152909
ENSMUSG00000072115	12.678	11.0755	17.8315	13.4564	5.7373	0	4.0482	0.695218	0.00611786	0.0386706	Ang	14	51091150	51102009	+	1202	protein_coding	angiogenin, ribonuclease, RNase A family, 5 [Source:MGI Symbol;Acc:MGI:88022]	-	11	12	18	15	6	0	4	0.820884	0.756956	1.27723	0.91358	0.3596	0	0.247254
ENSMUSG00000022469	156.746	180.899	146.615	176.727	89.8843	90.2117	109.301	0.694628	1.83529e-05	0.000329419	Rapgef3	15	97744770	97767972	-	6336	protein_coding	Rap guanine nucleotide exchange factor (GEF) 3 [Source:MGI Symbol;Acc:MGI:2441741]	-	136	196	148	197	94	86	108	5.44193	6.62934	5.63098	6.43349	3.02079	3.03175	3.57959
ENSMUSG00000078853	126.78	129.214	188.222	185.698	81.2783	96.5055	92.0966	0.694155	0.000155252	0.00204667	Igtp	11	58199556	58207591	+	2022	protein_coding	interferon gamma induced GTPase [Source:MGI Symbol;Acc:MGI:107729]	-	110	140	190	207	85	92	91	3.99266	4.29535	6.55739	6.13205	2.47781	2.94197	2.73594
ENSMUSG00000061838	132.543	243.66	170.39	146.226	128.133	68.1832	88.0484	0.694116	0.000916809	0.00887792	Suclg2	6	95473009	95718800	-	4623	protein_coding	succinate-Coenzyme A ligase, GDP-forming, beta subunit [Source:MGI Symbol;Acc:MGI:1306824]	-	115	264	172	163	134	65	87	4.97973	9.663	7.08181	5.76052	4.66006	2.47972	3.12048
ENSMUSG00000024014	112.95	102.448	109.961	124.696	71.7162	61.8894	59.711	0.693983	0.000104409	0.00145857	Pim1	17	29490812	29496111	+	2638	protein_coding	proviral integration site 1 [Source:MGI Symbol;Acc:MGI:97584]	-	98	111	111	139	75	59	59	2.52557	2.418	2.71997	2.92357	1.55229	1.33957	1.25945
ENSMUSG00000047819	23.0509	22.1509	27.738	41.2662	10.5184	16.7836	10.1205	0.692959	0.00721454	0.0436433	Tigd4	3	84593574	84597032	+	3459	protein_coding	tigger transposable element derived 4 [Source:MGI Symbol;Acc:MGI:2685264]	-	20	24	28	46	11	16	10	0.393085	0.398721	0.523266	0.737872	0.173631	0.27705	0.162799
ENSMUSG00000039037	436.815	443.019	475.508	478.149	260.091	282.174	289.446	0.692327	4.59433e-10	2.24375e-08	St6galnac5	3	152817081	152982246	-	6002	protein_coding	ST6 (alpha-N-acetyl-neuraminyl-2,3-beta-galactosyl-1,3)-N-acetylgalactosaminide alpha-2,6-sialyltransferase 5 [Source:MGI Symbol;Acc:MGI:1349471]	-	379	480	480	533	272	269	286	8.18747	8.76501	9.85961	9.39732	4.71909	5.1197	5.11766
ENSMUSG00000037999	412.612	361.799	357.621	377.675	201.762	232.872	244.916	0.692101	2.56998e-08	9.13485e-07	Arap2	5	62602445	62766159	-	12451	protein_coding	ArfGAP with RhoGAP domain, ankyrin repeat and PH domain 2 [Source:MGI Symbol;Acc:MGI:2684416]	-	358	392	361	421	211	222	242	10.3128	9.54513	9.88805	9.89791	4.88154	5.63416	5.77438
ENSMUSG00000032577	28.8137	32.3034	29.7192	26.0156	14.3432	14.6856	12.1446	0.691928	0.0058136	0.0373367	Mapkapk3	9	107254927	107289877	-	5542	protein_coding	mitogen-activated protein kinase-activated protein kinase 3 [Source:MGI Symbol;Acc:MGI:2143163]	-	25	35	30	29	15	14	12	1.20968	1.43153	1.38026	1.14524	0.58291	0.596816	0.480958
ENSMUSG00000029661	156.746	119.061	70.3355	165.065	85.1032	37.763	73.8797	0.691852	0.00310947	0.023184	Col1a2	6	4504814	4541544	+	12426	protein_coding	collagen, type I, alpha 2 [Source:MGI Symbol;Acc:MGI:88468]	-	136	129	71	184	89	36	73	4.04101	3.23997	2.00594	4.46206	2.12383	0.942399	1.79667
ENSMUSG00000106518	14.9831	15.6902	14.8596	11.6622	4.78108	6.29384	2.0241	0.691699	0.00769733	0.0456294	Gm42759	5	98031567	98034005	+	2439	TEC	predicted gene 42759 [Source:MGI Symbol;Acc:MGI:5662896]	-	13	17	15	13	5	6	2	0.362359	0.400539	0.397553	0.295737	0.111929	0.147342	0.0461765
ENSMUSG00000110246	58.7799	36.9182	57.4572	54.7225	19.1243	31.4692	29.3495	0.69147	0.00322468	0.0238066	C130073E24Rik	8	50743291	50916997	-	19000	lincRNA	RIKEN cDNA C130073E24 gene [Source:MGI Symbol;Acc:MGI:2442759]	-	51	40	58	61	20	30	29	0.342337	0.226957	0.370186	0.334179	0.107818	0.177413	0.161241
ENSMUSG00000062157	8.06783	19.3821	29.7192	17.0447	4.78108	6.29384	7.08435	0.691468	0.00797172	0.0467486	Ifnlr1	4	135686287	135708181	+	4182	protein_coding	interferon lambda receptor 1 [Source:MGI Symbol;Acc:MGI:2429859]	-	7	21	30	19	5	6	7	0.113795	0.288565	0.463717	0.252083	0.0652788	0.0859322	0.0942576
ENSMUSG00000020962	2966.66	2473.52	3232.46	2868	1586.36	1684.65	1966.41	0.691331	2.90392e-10	1.46587e-08	Gtf2a1	12	91555262	91590487	-	6241	protein_coding	general transcription factor II A, 1 [Source:MGI Symbol;Acc:MGI:1933277]	-	2574	2680	3263	3197	1659	1606	1943	60.9725	53.6613	73.4938	61.8065	31.561	33.516	38.1235
ENSMUSG00000054720	408.002	292.577	258.557	315.776	162.557	181.472	214.555	0.690946	1.91091e-05	0.000340619	Lrrc8c	5	105519388	105613018	+	7654	protein_coding	leucine rich repeat containing 8 family, member C [Source:MGI Symbol;Acc:MGI:2140839]	-	354	317	261	352	170	173	212	10.9592	8.29535	7.68287	8.89373	4.22671	4.71848	5.43633
ENSMUSG00000015090	683.46	2191.1	712.271	699.731	525.919	270.635	259.085	0.690856	0.00801348	0.0469171	Ptgds	2	25466709	25470046	-	1649	protein_coding	prostaglandin D2 synthase (brain) [Source:MGI Symbol;Acc:MGI:99261]	-	593	2374	719	780	550	258	256	45.0442	152.428	51.9303	48.3554	33.5526	17.2657	16.1072
ENSMUSG00000026222	43.7968	29.5346	42.5976	41.2662	24.8616	11.5387	20.241	0.690771	0.00518884	0.0341645	Sp100	1	85649988	85709998	+	7556	protein_coding	nuclear antigen Sp100 [Source:MGI Symbol;Acc:MGI:109561]	SAND	38	32	43	46	26	11	20	1.78411	1.26996	1.91962	1.76264	0.980373	0.455001	0.777793
ENSMUSG00000051504	53.0172	46.1478	50.5227	56.5167	30.5989	26.2243	25.3013	0.689875	0.00202468	0.0165173	Siglech	7	55768178	55778925	+	3383	protein_coding	sialic acid binding Ig-like lectin H [Source:MGI Symbol;Acc:MGI:2443256]	-	46	50	51	63	32	25	25	1.94482	1.78687	2.05022	2.17384	1.08655	0.931199	0.8755
ENSMUSG00000048537	467.934	417.176	472.536	466.487	262.959	277.978	287.422	0.68873	8.29698e-10	3.83384e-08	Phldb1	9	44686304	44735198	-	7179	protein_coding	pleckstrin homology like domain, family B, member 1 [Source:MGI Symbol;Acc:MGI:2143230]	-	406	452	477	520	275	265	284	10.8284	10.1901	12.0966	11.319	5.89046	6.2268	6.27409
ENSMUSG00000025887	11.5255	14.7673	22.7847	17.9418	3.82486	5.24487	8.0964	0.687342	0.00851961	0.0490674	Casp12	9	5345430	5373032	+	3840	protein_coding	caspase 12 [Source:MGI Symbol;Acc:MGI:1312922]	-	10	16	23	20	4	5	8	0.37832	0.511658	0.827361	0.617526	0.121534	0.166652	0.250694
ENSMUSG00000061524	138.306	151.365	65.3823	132.769	68.8475	63.9874	65.7833	0.686805	0.00150198	0.0131394	Zic2	14	122475435	122479852	+	2880	protein_coding	zinc finger protein of the cerebellum 2 [Source:MGI Symbol;Acc:MGI:106679]	zf-C2H2	120	164	66	148	72	61	65	5.09244	5.88287	2.66316	5.12593	2.4539	2.28064	2.28483
ENSMUSG00000017765	229.357	225.201	242.707	210.816	124.308	138.464	143.711	0.686676	9.59468e-07	2.43187e-05	Slc12a4	8	105943590	105966097	-	4279	protein_coding	solute carrier family 12, member 4 [Source:MGI Symbol;Acc:MGI:1309465]	-	199	244	245	235	130	132	142	7.31289	7.57925	8.56071	7.04806	3.8367	4.27357	4.32234
ENSMUSG00000054675	41.4917	59.0691	58.4478	42.1633	34.4238	27.2733	12.1446	0.685809	0.00529093	0.0346216	Tmem119	5	113793729	113800516	-	2315	protein_coding	transmembrane protein 119 [Source:MGI Symbol;Acc:MGI:2385228]	-	36	64	59	47	36	26	12	1.8987	2.85322	2.95879	2.0231	1.52488	1.20812	0.524241
ENSMUSG00000070604	156.746	113.524	177.325	158.785	107.096	81.8199	69.8315	0.685411	0.000280975	0.00335773	Vsig10l	7	43463151	43472019	+	4075	protein_coding	V-set and immunoglobulin domain containing 10 like [Source:MGI Symbol;Acc:MGI:1922940]	-	136	123	179	177	112	78	69	5.62741	4.30205	7.04256	5.97736	3.72192	2.84345	2.36491
ENSMUSG00000022602	49.5595	45.2248	81.2326	60.1051	19.1243	20.9795	46.5543	0.684661	0.00547902	0.0355683	Arc	15	74669083	74672570	-	3057	protein_coding	activity regulated cytoskeletal-associated protein [Source:MGI Symbol;Acc:MGI:88067]	-	43	49	82	67	20	20	46	0.957209	0.922009	1.73564	1.21725	0.357559	0.392238	0.848186
ENSMUSG00000020122	376.883	307.344	312.052	295.143	166.382	168.885	237.832	0.684476	7.20482e-06	0.00014507	Egfr	11	16752203	16918158	+	11326	protein_coding	epidermal growth factor receptor [Source:MGI Symbol;Acc:MGI:95294]	-	327	333	315	329	174	161	235	7.52312	6.47582	6.89078	6.17749	3.21498	3.2633	4.4783
ENSMUSG00000021994	165.967	151.365	116.896	137.255	86.0594	74.4771	88.0484	0.683273	8.64842e-05	0.0012389	Wnt5a	14	28504750	28527448	+	7823	protein_coding	wingless-type MMTV integration site family, member 5A [Source:MGI Symbol;Acc:MGI:98958]	-	144	164	118	153	90	71	87	4.26939	4.11006	3.32654	3.70221	2.14301	1.85457	2.13657
ENSMUSG00000023046	33.4239	63.6839	33.6818	35.8836	21.0367	14.6856	24.2892	0.682698	0.00626468	0.0393228	Igfbp6	15	102144362	102149511	+	1112	protein_coding	insulin-like growth factor binding protein 6 [Source:MGI Symbol;Acc:MGI:96441]	-	29	69	34	40	22	14	24	1.77297	3.56576	1.97647	1.99585	1.0802	0.75407	1.21537
ENSMUSG00000109150	27.6611	29.5346	29.7192	21.5302	10.5184	14.6856	12.1446	0.682303	0.00737556	0.0443938	Gm45793	7	89827218	89828559	+	1342	TEC	predicted gene 45793 [Source:MGI Symbol;Acc:MGI:5804908]	-	24	32	30	24	11	14	12	1.21581	1.37027	1.44505	0.992275	0.447534	0.624833	0.503537
ENSMUSG00000027239	97.9665	239.968	169.4	134.564	104.228	78.673	79.952	0.682267	0.00161127	0.0138733	Mdk	2	91929805	91932297	-	1324	protein_coding	midkine [Source:MGI Symbol;Acc:MGI:96949]	-	85	260	171	150	109	75	79	6.97905	18.0448	13.35	10.0516	7.18758	5.42525	5.37278
ENSMUSG00000031841	275.459	228.893	329.883	287.069	181.681	160.493	157.88	0.68198	4.71028e-06	0.000100812	Cdh13	8	118283733	119324921	+	11233	protein_coding	cadherin 13 [Source:MGI Symbol;Acc:MGI:99551]	-	239	248	333	320	190	153	156	8.05962	7.06918	10.6775	8.8071	5.14576	4.54558	4.35749
ENSMUSG00000002897	164.814	121.83	139.68	144.432	87.0156	81.8199	80.964	0.681934	5.29863e-05	0.000817522	Il17ra	6	120463247	120487559	+	8662	protein_coding	interleukin 17 receptor A [Source:MGI Symbol;Acc:MGI:107399]	-	143	132	141	161	91	78	80	2.18319	1.70345	2.04683	2.00607	1.11577	1.04913	1.01167
ENSMUSG00000040212	20.7458	25.8428	26.7473	27.8098	15.2995	11.5387	6.0723	0.680994	0.0084954	0.0489728	Emp3	7	45918023	45921404	-	1071	protein_coding	epithelial membrane protein 3 [Source:MGI Symbol;Acc:MGI:1098729]	-	18	28	27	31	16	11	6	2.1245	2.79347	3.0301	2.98616	1.51664	1.14382	0.586585
ENSMUSG00000048677	91.0512	105.217	114.914	88.812	54.5043	74.4771	38.4579	0.680349	0.000970068	0.00929378	Tpcn2	7	145186524	145284011	-	5256	protein_coding	two pore segment channel 2 [Source:MGI Symbol;Acc:MGI:2385297]	-	79	114	116	99	57	71	38	2.60211	3.17397	3.63299	2.66133	1.50783	2.06033	1.03676
ENSMUSG00000053965	333.086	290.731	243.698	196.463	155.863	153.15	158.892	0.678323	5.00546e-05	0.000783015	Pde5a	3	122728947	122859374	+	9831	protein_coding	phosphodiesterase 5A, cGMP-specific [Source:MGI Symbol;Acc:MGI:2651499]	-	289	315	246	219	163	146	157	4.37972	4.03515	3.5448	2.70868	1.98388	1.94932	1.9708
ENSMUSG00000067276	16.1357	32.3034	7.92513	9.868	4.78108	5.24487	3.03615	0.677655	0.00782373	0.0460757	Capn6	X	143802231	143827414	-	7795	protein_coding	calpain 6 [Source:MGI Symbol;Acc:MGI:1100850]	-	14	35	8	11	5	5	3	0.235007	0.496616	0.127688	0.150699	0.0674064	0.0739441	0.0417127
ENSMUSG00000024806	27.6611	77.5283	2.97192	5.38254	4.78108	1.04897	1.01205	0.677609	0.00303305	0.0227271	Mlana	19	29697921	29708448	+	623	protein_coding	melan-A [Source:MGI Symbol;Acc:MGI:108454]	-	24	84	3	6	5	1	1	2.61897	7.74817	0.311278	0.534363	0.438196	0.0961392	0.0903887
ENSMUSG00000058715	44.9493	44.3019	64.3917	45.7516	30.5989	27.2733	20.241	0.677285	0.00365072	0.026076	Fcer1g	1	171229572	171234365	-	874	protein_coding	Fc receptor, IgE, high affinity I, gamma polypeptide [Source:MGI Symbol;Acc:MGI:95496]	-	39	48	65	51	32	26	20	4.63528	4.82229	7.34569	4.94707	3.0545	2.72249	1.96896
ENSMUSG00000030075	70.3054	50.7625	38.635	71.7672	22.9492	36.7141	30.3615	0.676655	0.00411988	0.0284788	Cntn3	6	102162655	102573101	-	6730	protein_coding	contactin 3 [Source:MGI Symbol;Acc:MGI:99534]	-	61	55	39	80	24	35	30	0.887255	0.67621	0.539376	0.949674	0.280355	0.448506	0.361439
ENSMUSG00000037762	57.6273	76.6053	37.6444	55.6196	33.4676	29.3712	26.3133	0.676508	0.00377454	0.026722	Slc16a9	10	70245100	70285968	+	3869	protein_coding	solute carrier family 16 (monocarboxylic acid transporters), member 9 [Source:MGI Symbol;Acc:MGI:1914109]	-	50	83	38	62	35	28	26	1.30138	1.82605	0.940428	1.31702	0.731613	0.642057	0.560535
ENSMUSG00000040612	1384.21	1151.85	1239.29	1395.87	789.834	760.505	834.942	0.674362	1.43867e-11	9.06516e-10	Ildr2	1	166254139	166316823	+	8251	protein_coding	immunoglobulin-like domain containing receptor 2 [Source:MGI Symbol;Acc:MGI:1196370]	-	1201	1248	1251	1556	826	725	825	27.1259	23.8263	26.8662	28.6825	14.983	14.4265	15.4344
ENSMUSG00000037465	224.747	250.121	237.754	237.729	122.396	134.269	171.037	0.673845	5.19084e-06	0.000109794	Klf10	15	38291463	38300706	-	4179	protein_coding	Kruppel-like factor 10 [Source:MGI Symbol;Acc:MGI:1101353]	zf-C2H2	195	271	240	265	128	128	169	8.37984	9.84398	9.80664	9.29422	4.41764	4.8461	6.01565
ENSMUSG00000042312	42.6442	83.9889	126.802	52.0312	42.0735	36.7141	35.4218	0.673298	0.00607319	0.0384794	S100a13	3	90514435	90524581	+	715	protein_coding	S100 calcium binding protein A13 [Source:MGI Symbol;Acc:MGI:109581]	-	37	91	128	58	44	35	35	3.51806	7.3138	11.5723	4.50086	3.35995	2.93191	2.75654
ENSMUSG00000046834	93.3563	171.67	80.2419	94.1945	66.9351	73.4281	29.3495	0.673039	0.00481739	0.0322609	Krt1	15	101845426	101850794	-	4415	protein_coding	keratin 1 [Source:MGI Symbol;Acc:MGI:96698]	-	81	186	81	105	70	70	29	2.74649	5.33097	2.61148	2.90568	1.90621	2.09109	0.81449
ENSMUSG00000097354	80.6783	71.0676	105.999	93.2974	27.7303	52.4487	62.7471	0.672577	0.00254374	0.0197249	2310001H17Rik	6	129208412	129238725	-	7241	lincRNA	RIKEN cDNA 2310001H17 gene [Source:MGI Symbol;Acc:MGI:1923682]	-	70	77	107	104	29	50	62	3.12058	2.90154	4.53554	3.78388	1.03828	1.96376	2.28941
ENSMUSG00000004105	97.9665	99.6792	34.6724	46.6487	31.5551	31.4692	38.4579	0.672549	0.00700757	0.0427644	Angptl2	2	33216069	33247717	+	6286	protein_coding	angiopoietin-like 2 [Source:MGI Symbol;Acc:MGI:1347002]	-	85	108	35	52	33	30	38	2.33104	2.50354	0.912655	1.16386	0.726815	0.724825	0.863196
ENSMUSG00000053007	62.2375	34.1494	61.4198	74.4585	22.9492	31.4692	35.4218	0.671677	0.00484686	0.0324	Creb5	6	53287270	53700376	+	25021	protein_coding	cAMP responsive element binding protein 5 [Source:MGI Symbol;Acc:MGI:2443973]	TF_bZIP	54	37	62	83	24	30	35	1.29129	0.747881	1.40971	1.61985	0.460915	0.632023	0.693256
ENSMUSG00000018774	47.2544	24.9198	52.504	34.0894	21.0367	9.44076	24.2892	0.671414	0.00850046	0.0489728	Cd68	11	69664213	69666153	-	1257	protein_coding	CD68 antigen [Source:MGI Symbol;Acc:MGI:88342]	-	41	27	53	38	22	9	24	2.93405	1.63323	3.60635	2.21939	1.2644	0.567424	1.42262
ENSMUSG00000028173	141.763	159.671	90.1483	107.651	79.3659	71.3302	61.7351	0.669038	0.000850512	0.00833802	Wls	3	159839672	159938664	+	8792	protein_coding	wntless WNT ligand secretion mediator [Source:MGI Symbol;Acc:MGI:1915401]	-	123	173	91	120	83	68	61	3.48273	4.14059	2.44999	2.77308	1.88744	1.69631	1.43067
ENSMUSG00000031210	149.831	102.448	95.1015	112.136	54.5043	57.6935	82.9881	0.66816	0.00091018	0.0088426	Gpr165	X	96713441	96719388	+	4545	protein_coding	G protein-coupled receptor 165 [Source:MGI Symbol;Acc:MGI:1923456]	-	130	111	96	125	57	55	82	3.84425	2.77455	2.69928	3.01679	1.3537	1.43289	2.00852
ENSMUSG00000036334	125.628	71.0676	98.0735	126.49	52.5919	40.9099	78.9399	0.667906	0.00247075	0.0193169	Igsf10	3	59316735	59344394	-	10150	protein_coding	immunoglobulin superfamily, member 10 [Source:MGI Symbol;Acc:MGI:1923481]	-	109	77	99	141	55	39	78	1.06792	0.637678	0.922261	1.12745	0.432765	0.336633	0.632995
ENSMUSG00000029135	180.95	171.67	185.25	287.966	112.833	52.4487	166.988	0.666962	0.00348336	0.0251296	Fosl2	5	32135801	32157842	+	9680	protein_coding	fos-like antigen 2 [Source:MGI Symbol;Acc:MGI:102858]	TF_bZIP	157	186	187	321	118	50	165	2.73329	2.73716	3.09554	4.56097	1.64986	0.766898	2.37939
ENSMUSG00000019851	44.9493	54.4544	39.6256	78.0469	40.1611	22.0284	19.229	0.666321	0.00673471	0.0415353	Perp	10	18845020	18857073	+	1952	protein_coding	PERP, TP53 apoptosis effector [Source:MGI Symbol;Acc:MGI:1929938]	-	39	59	40	87	42	21	19	1.35829	1.73692	1.32463	2.47294	1.17478	0.644359	0.548121
ENSMUSG00000017830	29.9662	58.1462	56.4665	63.6934	31.5551	29.3712	19.229	0.666033	0.0058666	0.0375688	Dhx58	11	100694884	100704271	-	3272	protein_coding	DEXH (Asp-Glu-X-His) box polypeptide 58 [Source:MGI Symbol;Acc:MGI:1931560]	-	26	63	57	71	33	28	19	1.79999	3.68669	3.75214	4.01163	1.8348	1.70779	1.08954
ENSMUSG00000038292	72.6105	73.8364	128.783	86.1207	51.6357	43.0079	55.6628	0.665894	0.00196401	0.0161172	Ccdc155	7	45183624	45204892	-	2365	protein_coding	coiled-coil domain containing 155 [Source:MGI Symbol;Acc:MGI:2687329]	-	63	80	130	96	54	41	55	3.124	3.35321	6.12945	3.88515	2.15052	1.79116	2.25906
ENSMUSG00000070327	693.833	580.539	848.979	892.605	385.355	445.814	531.326	0.6652	1.0032e-05	0.000195445	Rnf213	11	119393100	119487418	+	16888	protein_coding	ring finger protein 213 [Source:MGI Symbol;Acc:MGI:1289196]	-	602	629	857	995	403	425	525	3.42452	3.0245	4.63545	4.61947	1.84114	2.12997	2.47376
ENSMUSG00000034164	54.1697	63.6839	89.1577	68.1789	46.8546	38.812	26.3133	0.665138	0.00307461	0.0229563	Emid1	11	5106265	5152257	-	2890	protein_coding	EMI domain containing 1 [Source:MGI Symbol;Acc:MGI:2155091]	-	47	69	90	76	49	37	26	3.03155	3.76198	5.51972	4.0008	2.53829	2.10257	1.38911
ENSMUSG00000019256	1814.11	1636.4	1809.9	1629.12	1010.72	1148.63	1055.57	0.663665	1.45424e-13	1.33708e-11	Ahr	12	35497974	35535038	-	6163	protein_coding	aryl-hydrocarbon receptor [Source:MGI Symbol;Acc:MGI:105043]	bHLH	1574	1773	1827	1816	1057	1095	1043	42.6833	40.6408	47.1085	40.1916	23.0201	26.1606	23.4278
ENSMUSG00000019975	1190.58	1068.78	1302.69	1314.24	774.535	719.595	773.207	0.662803	5.81513e-11	3.22445e-09	Ikbip	10	91082940	91102607	+	4933	protein_coding	IKBKB interacting protein [Source:MGI Symbol;Acc:MGI:1914704]	-	1033	1158	1315	1465	810	686	764	56.4985	53.5359	68.3864	65.3943	35.5795	33.0553	34.6118
ENSMUSG00000024664	348.069	381.181	403.191	379.469	250.529	241.264	204.434	0.662155	9.37193e-08	3.03762e-06	Fads3	19	10041548	10059671	+	3269	protein_coding	fatty acid desaturase 3 [Source:MGI Symbol;Acc:MGI:1928740]	-	302	413	407	423	262	230	202	6.28058	7.26011	8.04813	7.17958	4.37595	4.21407	3.47968
ENSMUSG00000032849	126.78	122.753	107.98	81.6352	62.154	48.2528	76.9158	0.662102	0.00102874	0.00975218	Abcc4	14	118482692	118706219	-	6389	protein_coding	ATP-binding cassette, sub-family C (CFTR/MRP), member 4 [Source:MGI Symbol;Acc:MGI:2443111]	-	110	133	109	91	65	46	76	2.1695	2.21727	2.04409	1.46478	1.02958	0.799291	1.24158
ENSMUSG00000028631	142.916	170.747	129.774	134.564	88.9281	82.8689	86.0243	0.661978	8.16499e-05	0.00117902	Kcnq4	4	120696138	120748612	-	4024	protein_coding	potassium voltage-gated channel, subfamily Q, member 4 [Source:MGI Symbol;Acc:MGI:1926803]	-	124	185	131	150	93	79	85	3.6227	4.5686	3.63907	3.57658	2.18209	2.03338	2.05696
ENSMUSG00000019359	44.9493	36.9182	62.4104	34.9865	26.774	25.1754	16.1928	0.660145	0.00681491	0.041858	Gdpd2	X	100729873	100738895	+	4609	protein_coding	glycerophosphodiester phosphodiesterase domain containing 2 [Source:MGI Symbol;Acc:MGI:1918834]	-	39	40	63	39	28	24	16	1.38671	1.20221	2.12994	1.13175	0.79957	0.751817	0.471232
ENSMUSG00000041779	46.1019	39.6871	44.5789	40.3691	17.2119	25.1754	25.3013	0.659475	0.00500999	0.0332542	Tram2	1	20996299	21079229	-	6661	protein_coding	translocating chain-associating membrane protein 2 [Source:MGI Symbol;Acc:MGI:1924817]	-	40	43	45	45	18	24	25	0.757905	0.68869	0.810728	0.695879	0.273909	0.400634	0.392365
ENSMUSG00000001507	526.714	486.398	515.133	527.489	334.676	319.937	301.591	0.659032	4.83683e-10	2.34945e-08	Itga3	11	95044474	95076801	-	5710	protein_coding	integrin alpha 3 [Source:MGI Symbol;Acc:MGI:96602]	-	457	527	520	588	350	305	298	11.4434	11.1545	12.3808	12.0166	7.03857	6.7285	6.18086
ENSMUSG00000078202	65.6952	84.9119	50.5227	63.6934	47.8108	31.4692	28.3374	0.658818	0.00366428	0.0261213	Nrarp	2	25180758	25183339	+	2582	protein_coding	Notch-regulated ankyrin repeat protein [Source:MGI Symbol;Acc:MGI:1914372]	-	57	92	51	71	50	30	28	1.50081	2.04757	1.27682	1.52572	1.0573	0.695911	0.610667
ENSMUSG00000000782	38.034	51.6855	54.4853	63.6934	28.6865	19.9305	34.4097	0.656878	0.00504239	0.0334199	Tcf7	11	52252371	52283014	-	2625	protein_coding	transcription factor 7, T cell specific [Source:MGI Symbol;Acc:MGI:98507]	HMG	33	56	55	71	30	19	34	1.06528	1.52805	1.68818	1.87057	0.777766	0.540361	0.909124
ENSMUSG00000029101	326.171	281.501	315.024	286.172	230.448	168.885	147.759	0.656678	1.86797e-05	0.000334066	Rgs12	5	34949445	35039644	+	8487	protein_coding	regulator of G-protein signaling 12 [Source:MGI Symbol;Acc:MGI:1918979]	-	283	305	318	319	241	161	146	10.1742	9.26864	10.8705	9.35993	6.95844	5.09944	4.34774
ENSMUSG00000001930	368.815	227.97	259.548	380.366	110.921	152.101	261.109	0.655404	0.00185044	0.0153822	Vwf	6	125546774	125686679	+	16064	protein_coding	Von Willebrand factor [Source:MGI Symbol;Acc:MGI:98941]	-	320	247	262	424	116	145	258	8.16933	5.33008	6.35983	8.83422	2.37834	3.26126	5.45571
ENSMUSG00000045031	193.628	251.044	278.37	226.067	143.432	147.905	140.675	0.655355	1.60863e-05	0.000292523	Cetn4	3	37307749	37312708	-	4032	protein_coding	centrin 4 [Source:MGI Symbol;Acc:MGI:2677454]	-	168	272	281	252	150	141	139	7.92598	10.8471	12.6054	9.70309	5.68347	5.86062	5.43192
ENSMUSG00000025588	40.3391	59.9921	76.2794	78.944	43.0297	32.5182	27.3254	0.654906	0.00483888	0.0323687	Nat1	8	67480921	67492104	+	1442	protein_coding	N-acetyl transferase 1 [Source:MGI Symbol;Acc:MGI:97279]	-	35	65	77	88	45	31	27	1.86331	2.92503	3.89776	3.82354	1.92401	1.45398	1.19063
ENSMUSG00000022901	14.9831	12.9214	7.92513	11.6622	4.78108	3.14692	0	0.653973	0.00857356	0.0492836	Cd86	16	36603869	36666081	-	3661	protein_coding	CD86 antigen [Source:MGI Symbol;Acc:MGI:101773]	-	13	14	8	13	5	3	0	0.749613	0.682373	0.438623	0.611791	0.231549	0.152404	0
ENSMUSG00000048120	84.1359	53.5314	73.3074	73.5614	48.767	34.6161	35.4218	0.653414	0.00251464	0.0195666	Entpd1	19	40612366	40741602	+	5580	protein_coding	ectonucleoside triphosphate diphosphohydrolase 1 [Source:MGI Symbol;Acc:MGI:102805]	-	73	58	74	82	51	33	35	4.68635	3.14731	4.51701	4.29627	2.62942	1.86641	1.86112
ENSMUSG00000059555	86.441	116.292	80.2419	113.93	55.4605	68.1832	48.5784	0.651983	0.00113735	0.0105923	Tor4a	2	25192966	25196886	-	3301	protein_coding	torsin family 4, member A [Source:MGI Symbol;Acc:MGI:2442720]	-	75	126	81	127	58	65	48	3.48517	4.94919	3.57895	4.81651	2.16456	2.66108	1.84756
ENSMUSG00000020674	620.07	630.379	743.971	633.346	421.691	434.275	370.41	0.651293	7.2199e-09	2.81015e-07	Pxdn	12	29937608	30017658	+	9648	protein_coding	peroxidasin [Source:MGI Symbol;Acc:MGI:1916925]	-	538	683	751	706	441	414	366	11.1477	11.9625	14.7962	11.9391	7.33869	7.55758	6.2817
ENSMUSG00000086226	34.5764	37.8412	40.6163	42.1633	21.0367	12.5877	26.3133	0.648218	0.00781792	0.0460715	Gm12660	11	50851332	50852582	-	664	antisense	predicted gene 12660 [Source:MGI Symbol;Acc:MGI:3650844]	-	30	41	41	47	22	12	26	3.07157	3.54833	3.99145	3.92738	1.80901	1.08243	2.205
ENSMUSG00000029287	227.052	189.206	143.643	128.284	91.7967	109.093	102.217	0.646853	0.000611591	0.00641904	Tgfbr3	5	107106570	107289629	-	6545	protein_coding	transforming growth factor, beta receptor III [Source:MGI Symbol;Acc:MGI:104637]	-	197	205	145	143	96	104	101	4.87545	4.28848	3.41212	2.88836	1.90809	2.26758	2.07045
ENSMUSG00000038058	104.882	79.3742	73.3074	94.1945	59.2854	48.2528	44.5302	0.646742	0.00130476	0.0117704	Nod1	6	54923949	54972612	-	5079	protein_coding	nucleotide-binding oligomerization domain containing 1 [Source:MGI Symbol;Acc:MGI:1341839]	-	91	86	74	105	62	46	44	3.4795	2.77955	2.69039	3.27666	1.90391	1.54958	1.39355
ENSMUSG00000034780	925.495	708.83	878.699	974.24	445.597	518.193	646.7	0.646121	3.39787e-06	7.57834e-05	B3galt1	2	67565871	68122689	+	5753	protein_coding	UDP-Gal:betaGlcNAc beta 1,3-galactosyltransferase, polypeptide 1 [Source:MGI Symbol;Acc:MGI:1349403]	-	803	768	887	1086	466	494	639	24.1447	19.5195	25.3594	26.6503	11.2531	13.0862	15.9149
ENSMUSG00000015224	86.441	71.9905	78.2607	82.5323	49.7232	35.6651	52.6266	0.645968	0.00137128	0.0122639	Cyp2j9	4	96568429	96591578	-	3337	protein_coding	cytochrome P450, family 2, subfamily j, polypeptide 9 [Source:MGI Symbol;Acc:MGI:1921769]	-	75	78	79	92	52	34	52	2.23045	1.96077	2.23391	2.23298	1.24198	0.890823	1.28094
ENSMUSG00000029878	59.9324	38.7641	59.4385	40.3691	21.0367	23.0774	34.4097	0.645505	0.00674187	0.0415541	Dbpht2	12	74296668	74302008	+	5341	lincRNA	DNA binding protein with his-thr domain [Source:MGI Symbol;Acc:MGI:2679513]	-	52	42	60	45	22	22	34	0.84817	0.579068	0.930548	0.599043	0.288192	0.316143	0.45936
ENSMUSG00000041936	2431.87	2544.59	3934.83	2768.42	1990.84	1871.37	1501.88	0.645442	1.3063e-05	0.000243398	Agrn	4	156165290	156197488	-	9285	protein_coding	agrin [Source:MGI Symbol;Acc:MGI:87961]	-	2110	2757	3972	3086	2082	1784	1484	26.6927	29.4813	47.7779	31.8619	21.1529	19.8832	15.5503
ENSMUSG00000110289	78.3732	131.983	129.774	98.68	81.2783	54.5466	52.6266	0.642915	0.00212976	0.0172109	4930412F12Rik	8	57650889	57652359	-	1471	TEC	RIKEN cDNA 4930412F12 gene [Source:MGI Symbol;Acc:MGI:1922099]	-	68	143	131	110	85	52	52	3.14271	5.58639	5.7567	4.1491	3.15495	2.11728	1.99064
ENSMUSG00000007655	1668.89	1432.43	1468.13	1504.42	958.128	975.545	946.267	0.641742	2.53189e-13	2.20421e-11	Cav1	6	17306335	17341452	+	3444	protein_coding	caveolin 1, caveolae protein [Source:MGI Symbol;Acc:MGI:102709]	-	1448	1552	1482	1677	1002	930	935	106.423	96.4179	103.567	100.592	59.1442	60.2185	56.921
ENSMUSG00000062960	5623.28	4467.1	4506.43	5176.21	3389.79	2793.42	3164.68	0.637147	1.65163e-09	7.22429e-08	Kdr	5	75932827	75978458	-	9030	protein_coding	kinase insert domain protein receptor [Source:MGI Symbol;Acc:MGI:96683]	-	4879	4840	4549	5770	3545	2663	3127	75.8506	63.6024	67.2437	73.2099	44.2612	36.4737	40.2671
ENSMUSG00000027478	112.95	119.061	176.334	144.432	85.1032	80.7709	81.9761	0.636984	0.000503433	0.00546199	Dnmt3b	2	153649450	153687730	+	5106	protein_coding	DNA methyltransferase 3B [Source:MGI Symbol;Acc:MGI:1261819]	-	98	129	178	161	89	77	81	1.88524	2.09764	3.25588	2.52774	1.37502	1.30501	1.29069
ENSMUSG00000085691	107.187	118.138	199.119	106.754	88.9281	84.9668	51.6146	0.636686	0.00345465	0.0249724	Gm14216	2	154722352	154738451	-	684	lincRNA	predicted gene 14216 [Source:MGI Symbol;Acc:MGI:3650218]	-	93	128	201	119	93	81	51	14.05	16.3458	28.8735	14.6726	11.2838	10.781	6.38205
ENSMUSG00000037679	993.495	817.739	929.221	889.017	582.335	573.788	563.712	0.636569	1.39649e-10	7.33709e-09	Inf2	12	112588784	112615557	+	4871	protein_coding	inverted formin, FH2 and WH2 domain containing [Source:MGI Symbol;Acc:MGI:1917685]	-	862	886	938	991	609	547	557	24.6021	21.3747	25.4552	23.0837	13.9592	13.7542	13.1679
ENSMUSG00000021680	237.425	311.959	96.0922	273.613	166.382	103.848	107.277	0.635683	0.00597371	0.0380262	Crhbp	13	95431371	95444924	-	1800	protein_coding	corticotropin releasing hormone binding protein [Source:MGI Symbol;Acc:MGI:88497]	-	206	338	97	305	174	99	106	8.04869	11.1629	3.60361	9.72577	5.45992	3.4078	3.43051
ENSMUSG00000023067	46.1019	58.1462	62.4104	72.6643	41.1173	20.9795	36.4338	0.635435	0.00583051	0.037432	Cdkn1a	17	29090976	29100727	+	3553	protein_coding	cyclin-dependent kinase inhibitor 1A (P21) [Source:MGI Symbol;Acc:MGI:104556]	-	40	63	63	81	43	20	36	1.93	2.56943	2.89031	3.18968	1.66626	0.850173	1.43878
ENSMUSG00000029822	463.324	457.786	493.339	457.516	291.646	286.37	307.663	0.635281	3.0981e-09	1.29238e-07	Osbpl3	6	50293330	50456201	-	9021	protein_coding	oxysterol binding protein-like 3 [Source:MGI Symbol;Acc:MGI:1918970]	-	402	496	498	510	305	273	304	10.5276	10.9796	12.4005	10.9003	6.41478	6.29864	6.59434
ENSMUSG00000024411	4129.58	3382.63	3557.39	3863.77	2248.06	2364.39	2497.74	0.634676	4.05302e-12	2.83099e-10	Aqp4	18	15389394	15403684	-	5082	protein_coding	aquaporin 4 [Source:MGI Symbol;Acc:MGI:107387]	-	3583	3665	3591	4307	2351	2254	2468	47.9313	41.4426	45.6768	47.0234	25.2583	26.5649	27.3472
ENSMUSG00000036523	369.968	424.56	468.573	353.454	207.499	250.705	292.483	0.634354	1.25822e-05	0.000235947	Greb1	12	16670615	16800886	-	9580	protein_coding	gene regulated by estrogen in breast cancer protein [Source:MGI Symbol;Acc:MGI:2149712]	-	321	460	473	394	217	239	289	7.99374	9.68285	11.1999	8.00769	4.33994	5.24353	5.96125
ENSMUSG00000087150	121.017	200.281	193.175	156.991	114.746	106.995	77.9279	0.634299	0.000808693	0.00802061	BC064078	6	128992952	129008040	+	2547	transcribed_unprocessed_pseudogene	cDNA sequence BC064078 [Source:MGI Symbol;Acc:MGI:3040692]	-	105	217	195	175	120	102	77	4.97792	8.69598	8.79024	6.77115	4.56897	4.26029	3.02374
ENSMUSG00000038390	3404.62	3993.63	4120.08	3732.79	2601.86	2253.19	2409.69	0.633639	9.09321e-12	6.02459e-10	Gpr162	6	124858444	124863983	-	3838	protein_coding	G protein-coupled receptor 162 [Source:MGI Symbol;Acc:MGI:1315214]	-	2954	4327	4159	4161	2721	2148	2381	83.8518	103.822	112.253	96.3975	62.0311	53.7177	55.983
ENSMUSG00000029122	174.035	160.594	176.334	198.257	130.045	112.24	79.952	0.632911	0.000235116	0.00289019	Evc	5	37289098	37336894	-	7701	protein_coding	EvC ciliary complex subunit 1 [Source:MGI Symbol;Acc:MGI:1890596]	-	151	174	178	221	136	107	79	5.57913	5.43425	6.25342	6.6642	4.03559	3.48301	2.41775
ENSMUSG00000064210	448.341	325.803	335.827	351.659	201.762	215.039	261.109	0.632321	1.53668e-05	0.000281143	Ano6	15	95790843	95974751	+	12269	protein_coding	anoctamin 6 [Source:MGI Symbol;Acc:MGI:2145890]	-	389	353	339	392	211	205	258	10.195	7.82011	8.44783	8.38474	4.44118	4.73339	5.60083
ENSMUSG00000006219	46.1019	47.9937	53.4946	40.3691	28.6865	23.0774	26.3133	0.629074	0.00591583	0.0377868	Fblim1	4	141576062	141606096	-	4457	protein_coding	filamin binding LIM protein 1 [Source:MGI Symbol;Acc:MGI:1921452]	-	40	52	54	45	30	22	26	2.5156	2.7643	3.22911	2.30973	1.51524	1.21895	1.35441
ENSMUSG00000067206	311.188	256.582	316.015	261.95	218.973	166.787	142.699	0.627913	6.60528e-05	0.000989474	Lrrc66	5	73606642	73632526	-	3238	protein_coding	leucine rich repeat containing 66 [Source:MGI Symbol;Acc:MGI:2387634]	-	270	278	319	292	229	159	141	10.2776	8.94481	11.5458	9.07141	7.00068	5.33217	4.4457
ENSMUSG00000041736	104.882	143.981	123.83	129.181	102.315	71.3302	44.5302	0.627534	0.0027625	0.0211436	Tspo	15	83563592	83574203	+	1051	protein_coding	translocator protein [Source:MGI Symbol;Acc:MGI:88222]	-	91	156	125	144	107	68	44	8.91434	12.9173	11.643	11.5127	8.41803	5.86865	3.57022
ENSMUSG00000015243	1761.09	1299.52	1035.22	1483.79	917.967	784.632	901.737	0.62649	1.487e-05	0.000273441	Abca1	4	53030787	53159895	-	10363	protein_coding	ATP-binding cassette, sub-family A (ABC1), member 1 [Source:MGI Symbol;Acc:MGI:99607]	-	1528	1408	1045	1654	960	748	891	18.8256	14.6632	12.2419	16.6313	9.49896	8.11911	9.09282
ENSMUSG00000034573	663.867	521.47	550.796	615.404	336.588	306.3	456.435	0.626322	1.06756e-05	0.000204883	Ptpn13	5	103425192	103598303	+	12102	protein_coding	protein tyrosine phosphatase, non-receptor type 13 [Source:MGI Symbol;Acc:MGI:103293]	-	576	565	556	686	352	292	451	9.70239	8.04461	8.9051	9.43075	4.76187	4.33331	6.29257
ENSMUSG00000050730	257.018	218.74	303.136	303.217	154.907	155.248	192.29	0.625404	5.17741e-05	0.00080496	Arhgap42	9	8994329	9239101	-	7215	protein_coding	Rho GTPase activating protein 42 [Source:MGI Symbol;Acc:MGI:1918794]	-	223	237	306	338	162	148	190	6.00176	5.39166	7.83075	7.42432	3.50161	3.50927	4.23567
ENSMUSG00000041390	134.848	114.446	97.0828	118.416	54.5043	72.3791	81.9761	0.625069	0.000922571	0.00890978	Mdfic	6	15720661	15802169	+	7427	protein_coding	MyoD family inhibitor domain containing [Source:MGI Symbol;Acc:MGI:104611]	-	117	124	98	132	57	69	81	2.97351	2.66383	2.3682	2.73794	1.16342	1.54495	1.70515
ENSMUSG00000071112	44.9493	72.9135	106.989	69.9731	34.4238	47.2038	41.4941	0.623104	0.00696298	0.0425788	Spx	6	142413441	142419730	+	1773	protein_coding	spexin hormone [Source:MGI Symbol;Acc:MGI:2442262]	-	39	79	108	78	36	45	41	2.1591	3.69689	5.68513	3.52427	1.60063	2.19484	1.88013
ENSMUSG00000038214	144.068	115.369	137.699	130.078	83.1908	72.3791	86.0243	0.622525	0.000245705	0.00298775	Bend3	10	43478831	43515396	+	6819	protein_coding	BEN domain containing 3 [Source:MGI Symbol;Acc:MGI:2677212]	-	125	125	139	145	87	69	85	2.49355	2.10775	2.63652	2.36071	1.39382	1.21266	1.4045
ENSMUSG00000025870	266.238	293.5	256.576	332.821	158.732	186.717	195.326	0.62056	1.38575e-05	0.000256656	Arl10	13	54575015	54581128	+	1729	protein_coding	ADP-ribosylation factor-like 10 [Source:MGI Symbol;Acc:MGI:1930788]	-	231	318	259	371	166	178	193	24.0864	28.0277	25.6784	31.5718	13.901	16.3516	16.6691
ENSMUSG00000000567	615.46	452.248	521.077	553.505	306.945	288.468	409.88	0.620336	1.462e-05	0.000269394	Sox9	11	112782224	112787760	+	4135	protein_coding	SRY (sex determining region Y)-box 9 [Source:MGI Symbol;Acc:MGI:98371]	HMG	534	490	526	617	321	275	405	8.77957	6.80971	8.22291	8.2791	4.23854	3.98332	5.51546
ENSMUSG00000022587	411.459	567.618	575.563	529.283	408.304	296.859	267.181	0.618761	6.2089e-05	0.00093868	Ly6e	15	74955051	74959905	+	3784	protein_coding	lymphocyte antigen 6 complex, locus E [Source:MGI Symbol;Acc:MGI:106651]	-	357	615	581	590	427	283	264	22.6825	33.0293	35.1	30.5944	21.7887	15.8413	13.8938
ENSMUSG00000004562	367.662	416.253	474.517	490.708	328.938	274.831	215.567	0.61766	4.04909e-05	0.000652672	Arhgef40	14	51984719	52006251	+	10366	protein_coding	Rho guanine nucleotide exchange factor (GEF) 40 [Source:MGI Symbol;Acc:MGI:2685515]	-	319	451	479	547	344	262	213	10.7574	12.8556	15.3589	15.0546	9.31653	7.78394	5.94965
ENSMUSG00000022475	512.883	547.313	684.533	494.297	377.705	387.071	290.458	0.617067	1.28055e-05	0.000239387	Hdac7	15	97792664	97844502	-	6755	protein_coding	histone deacetylase 7 [Source:MGI Symbol;Acc:MGI:1891835]	-	445	593	691	551	395	369	287	9.25166	10.4211	13.6598	9.34926	6.59532	6.75876	4.94238
ENSMUSG00000001985	379.188	380.258	465.601	479.943	250.529	270.635	288.434	0.616992	2.2975e-06	5.26759e-05	Grik3	4	125490700	125714173	+	8973	protein_coding	glutamate receptor, ionotropic, kainate 3 [Source:MGI Symbol;Acc:MGI:95816]	-	329	412	470	535	262	258	285	2.49268	2.63856	3.38591	3.30818	1.59423	1.72215	1.78858
ENSMUSG00000024909	272.001	199.358	219.922	191.977	126.22	148.954	135.615	0.616945	9.22075e-05	0.00131047	Efemp2	19	5473973	5481853	+	2648	protein_coding	epidermal growth factor-containing fibulin-like extracellular matrix protein 2 [Source:MGI Symbol;Acc:MGI:1891209]	-	236	216	222	214	132	142	134	19.6621	15.2115	17.5864	14.5511	8.83222	10.4229	9.24734
ENSMUSG00000080316	200.543	254.736	335.827	207.228	146.301	143.709	169.012	0.616363	0.00041371	0.00465385	Spaca6	17	17827158	17843009	+	7067	protein_coding	sperm acrosome associated 6 [Source:MGI Symbol;Acc:MGI:1922452]	-	174	276	339	231	153	137	167	13.4271	18.0028	24.8736	14.5482	9.48204	9.31394	10.6744
ENSMUSG00000026638	71.4579	67.3757	57.4572	65.4876	43.9859	25.1754	43.5182	0.616074	0.00477507	0.032037	Irf6	1	193153111	193172023	+	7069	protein_coding	interferon regulatory factor 6 [Source:MGI Symbol;Acc:MGI:1859211]	IRF	62	73	58	73	46	24	43	1.93349	1.92431	1.71984	1.85797	1.15209	0.659391	1.11074
ENSMUSG00000035131	74.9156	77.5283	91.139	84.3265	67.8913	45.1058	26.3133	0.615954	0.00616861	0.0388823	Brinp3	1	146494760	146902472	+	7003	protein_coding	bone morphogenetic protein/retinoic acid inducible neural specific 3 [Source:MGI Symbol;Acc:MGI:2443035]	-	65	84	92	94	71	43	26	1.62641	1.77663	2.18884	1.9196	1.42677	0.947911	0.538873
ENSMUSG00000004044	421.832	341.494	355.64	416.25	226.623	224.48	276.29	0.61535	4.15421e-06	9.05445e-05	Cavin1	11	100956733	100970887	-	3587	protein_coding	caveolae associated 1 [Source:MGI Symbol;Acc:MGI:1277968]	-	366	370	359	464	237	214	273	11.9972	10.2518	11.1893	12.4132	6.23916	6.18007	7.41236
ENSMUSG00000025727	125.628	131.983	113.924	156.094	75.5411	99.6524	65.7833	0.614594	0.000850843	0.00833802	A930017K11Rik	17	25946387	25952565	-	2539	protein_coding	RIKEN cDNA A930017K11 gene [Source:MGI Symbol;Acc:MGI:2442713]	-	109	143	115	174	79	95	65	2.91858	3.23654	2.92786	3.80242	1.69883	2.24104	1.44163
ENSMUSG00000021760	126.78	182.745	188.222	138.152	111.877	98.6035	79.952	0.614001	0.000791165	0.0078902	Gpx8	13	113042753	113046410	-	1048	protein_coding	glutathione peroxidase 8 (putative) [Source:MGI Symbol;Acc:MGI:1916840]	-	110	198	190	154	117	94	79	8.26326	12.5726	13.5713	9.4416	7.05868	6.22111	4.91565
ENSMUSG00000035673	1026.92	905.419	1530.54	1016.4	702.819	657.706	744.869	0.613622	3.97713e-05	0.000642221	Sbno2	10	80056992	80105571	-	10715	protein_coding	strawberry notch 2 [Source:MGI Symbol;Acc:MGI:2448490]	-	891	981	1545	1133	735	627	736	19.8213	18.4469	32.6806	20.5707	13.1317	12.2886	13.5621
ENSMUSG00000025488	14.9831	33.2264	3.96256	7.17672	4.78108	1.04897	0	0.613389	0.00792949	0.0465312	Cox8b	7	140898945	140900446	-	360	protein_coding	cytochrome c oxidase subunit 8B [Source:MGI Symbol;Acc:MGI:105958]	-	13	36	4	8	5	1	0	2.45498	5.74656	0.718245	1.23299	0.758322	0.166374	0
ENSMUSG00000022969	66.8477	62.761	93.1203	73.5614	43.0297	48.2528	39.47	0.613223	0.00330111	0.0242021	Il10rb	16	91406164	91425834	+	3808	protein_coding	interleukin 10 receptor, beta [Source:MGI Symbol;Acc:MGI:109380]	-	58	68	94	82	45	46	39	2.70259	2.67831	4.16474	3.1184	1.68401	1.88839	1.50526
ENSMUSG00000032038	397.629	467.938	596.366	455.722	319.376	327.28	258.073	0.612923	2.53488e-05	0.000439664	St3gal4	9	35046576	35119268	-	2923	protein_coding	ST3 beta-galactoside alpha-2,3-sialyltransferase 4 [Source:MGI Symbol;Acc:MGI:1316743]	-	345	507	602	508	334	312	255	33.9429	42.1636	56.3163	40.7905	26.3909	27.0436	20.7809
ENSMUSG00000029163	79.5257	49.8396	93.1203	93.2974	41.1173	38.812	55.6628	0.612168	0.00592094	0.0377971	Emilin1	5	30913402	30921277	+	4937	protein_coding	elastin microfibril interfacer 1 [Source:MGI Symbol;Acc:MGI:1926189]	-	69	54	94	104	43	37	55	1.69714	1.1227	2.19839	2.0877	0.849409	0.801774	1.12054
ENSMUSG00000045062	208.611	203.05	199.119	253.877	144.389	120.632	141.687	0.611531	5.1606e-05	0.000803102	Pcdhb7	18	37341702	37345202	+	3501	protein_coding	protocadherin beta 7 [Source:MGI Symbol;Acc:MGI:2136741]	-	181	220	201	283	151	115	140	3.51475	3.61109	3.71124	4.48506	2.35489	1.96741	2.25184
ENSMUSG00000090122	103.729	124.599	113.924	130.975	73.6286	75.5261	69.8315	0.611228	0.000444646	0.00491895	Kcne1l	X	142304752	142306294	-	1543	protein_coding	potassium voltage-gated channel, Isk-related family, member 1-like, pseudogene [Source:MGI Symbol;Acc:MGI:1913490]	-	90	135	115	146	77	72	69	3.96537	5.02777	4.81778	5.25001	2.72465	2.79483	2.51817
ENSMUSG00000042644	154.441	153.211	132.746	158.785	97.534	69.2322	109.301	0.611216	0.000474198	0.00521069	Itpr3	17	27057304	27122223	+	8990	protein_coding	inositol 1,4,5-triphosphate receptor 3 [Source:MGI Symbol;Acc:MGI:96624]	-	134	166	134	177	102	66	108	1.01333	1.0611	0.963519	1.09241	0.619479	0.439717	0.676498
ENSMUSG00000009585	59.9324	50.7625	61.4198	57.4138	31.5551	20.9795	44.5302	0.610366	0.00755039	0.0449655	Apobec3	15	79891659	79915906	+	9454	protein_coding	apolipoprotein B mRNA editing enzyme, catalytic polypeptide 3 [Source:MGI Symbol;Acc:MGI:1933111]	-	52	55	62	64	33	20	44	2.38541	2.13266	2.70432	2.3961	1.21577	0.808296	1.67189
ENSMUSG00000034353	62.2375	81.2201	58.4478	61.0022	34.4238	40.9099	40.482	0.609248	0.00414669	0.0286203	Ramp1	1	91179822	91225196	+	3022	protein_coding	receptor (calcitonin) activity modifying protein 1 [Source:MGI Symbol;Acc:MGI:1858418]	-	54	88	59	68	36	39	40	2.83267	3.90198	2.94281	2.91124	1.51664	1.80239	1.73803
ENSMUSG00000041479	598.172	560.234	635.992	644.111	369.099	380.777	427.085	0.607925	1.8468e-08	6.66958e-07	Syt15	14	34219595	34230420	+	5164	protein_coding	synaptotagmin XV [Source:MGI Symbol;Acc:MGI:2442166]	-	519	607	642	718	386	363	422	15.3876	15.2122	18.0987	17.3738	9.19114	9.48181	10.3636
ENSMUSG00000034311	182.102	185.514	196.147	208.125	157.776	97.5545	102.217	0.607692	0.000406115	0.0045881	Kif4	X	100625737	100727214	+	5514	protein_coding	kinesin family member 4 [Source:MGI Symbol;Acc:MGI:108389]	-	158	201	198	232	165	93	101	5.04769	5.42791	6.01463	6.04909	4.23349	2.61758	2.67271
ENSMUSG00000038936	1145.63	1276.45	1499.83	1404.84	963.866	798.268	801.544	0.607452	1.34909e-07	4.19897e-06	Sccpdh	1	179668210	179687189	+	7562	protein_coding	saccharopine dehydrogenase (putative) [Source:MGI Symbol;Acc:MGI:1924486]	-	994	1383	1514	1566	1008	761	792	35.251	41.458	51.0527	45.3256	28.7094	23.7767	23.2651
ENSMUSG00000028163	647.731	575.924	627.076	645.905	382.486	365.043	456.435	0.605675	7.57253e-08	2.50394e-06	Nfkb1	3	135584655	135691547	-	12061	protein_coding	nuclear factor of kappa light polypeptide gene enhancer in B cells 1, p105 [Source:MGI Symbol;Acc:MGI:97312]	RHD	562	624	633	720	400	348	451	14.1194	13.2515	15.1214	14.7631	8.07084	7.70265	9.38536
ENSMUSG00000029695	64.5426	109.832	75.2887	78.0469	63.1102	43.0079	36.4338	0.604607	0.00603098	0.0383311	Aass	6	23072173	23132986	-	3817	protein_coding	aminoadipate-semialdehyde synthase [Source:MGI Symbol;Acc:MGI:1353573]	-	56	119	76	87	66	41	36	2.78909	5.00982	3.59912	3.53639	2.63996	1.79904	1.48516
ENSMUSG00000032841	109.492	97.8333	106.989	131.872	83.1908	57.6935	62.7471	0.604135	0.00138992	0.0123693	Prr5l	2	101714285	101883027	-	4967	protein_coding	proline rich 5 like [Source:MGI Symbol;Acc:MGI:1919696]	-	95	106	108	147	87	55	62	4.61651	4.35408	4.99024	5.83006	3.39538	2.35469	2.49561
ENSMUSG00000040274	197.086	169.824	153.549	191.08	97.534	130.073	106.265	0.603854	0.000206352	0.00260156	Cdk6	5	3341485	3531008	+	13989	protein_coding	cyclin-dependent kinase 6 [Source:MGI Symbol;Acc:MGI:1277162]	-	171	184	155	213	102	124	105	3.93544	3.57944	3.39185	4.00076	1.88528	2.5142	2.00162
ENSMUSG00000034463	922.038	813.124	915.352	932.974	619.628	569.592	551.568	0.602968	8.24313e-10	3.81875e-08	Scara3	14	65919394	65953935	-	3597	protein_coding	scavenger receptor class A, member 3 [Source:MGI Symbol;Acc:MGI:2444418]	-	800	881	924	1040	648	543	545	15.1202	14.0748	16.6053	16.0423	9.83605	9.04166	8.53215
ENSMUSG00000043313	726.105	640.531	587.45	601.948	330.851	366.092	518.17	0.602124	3.35569e-05	0.000557354	Pcdhb19	18	37496991	37504128	+	7138	protein_coding	protocadherin beta 19 [Source:MGI Symbol;Acc:MGI:2136757]	-	630	694	593	671	346	349	512	6.00028	5.58716	5.37024	5.21578	2.64659	2.92845	4.0392
ENSMUSG00000014773	345.764	399.64	326.912	369.601	259.134	244.411	186.217	0.599101	1.77204e-05	0.000320301	Dll1	17	15367354	15376872	-	4219	protein_coding	delta like canonical Notch ligand 1 [Source:MGI Symbol;Acc:MGI:104659]	-	300	433	330	412	271	233	184	17.0671	20.8223	17.851	19.1295	12.3819	11.6782	8.67066
ENSMUSG00000026989	207.458	413.484	299.174	255.671	235.229	169.934	126.506	0.597649	0.00303205	0.0227271	Dapl1	2	59484653	59505020	+	679	protein_coding	death associated protein-like 1 [Source:MGI Symbol;Acc:MGI:1923997]	-	180	448	302	285	246	162	125	19.8012	41.6579	31.5888	25.5876	21.7337	15.7006	11.39
ENSMUSG00000038507	314.645	278.733	327.902	331.026	214.192	203.501	185.205	0.597355	3.62425e-06	8.03353e-05	Parp12	6	39086410	39118349	-	3995	protein_coding	poly (ADP-ribose) polymerase family, member 12 [Source:MGI Symbol;Acc:MGI:2143990]	-	273	302	331	369	224	194	183	8.75456	8.18614	10.0927	9.65748	5.76897	5.48093	4.86091
ENSMUSG00000029570	206.306	227.97	228.838	235.038	170.206	99.6524	151.808	0.597324	0.000330197	0.00384974	Lfng	5	140607320	140615545	+	2505	protein_coding	LFNG O-fucosylpeptide 3-beta-N-acetylglucosaminyltransferase [Source:MGI Symbol;Acc:MGI:1095413]	-	179	247	231	262	178	95	150	9.19815	10.7286	11.2867	10.9879	7.34593	4.30083	6.3846
ENSMUSG00000024076	202.848	174.439	209.025	222.478	110.921	116.436	154.844	0.596523	0.000204892	0.00259048	Vit	17	78508064	78627408	+	3227	protein_coding	vitrin [Source:MGI Symbol;Acc:MGI:1921449]	-	176	189	211	248	116	111	153	7.48293	6.79237	8.53001	8.60551	3.96092	4.15779	5.38822
ENSMUSG00000041120	814.851	1076.17	875.727	1005.64	703.775	566.445	551.568	0.596404	2.10762e-06	4.90083e-05	Nbl1	4	139082284	139092993	-	2033	protein_coding	neuroblastoma, suppression of tumorigenicity 1 [Source:MGI Symbol;Acc:MGI:104591]	-	707	1166	884	1121	736	540	545	51.5716	71.8937	61.3129	66.7365	43.117	34.703	32.9293
ENSMUSG00000017929	549.765	486.398	525.04	540.048	342.325	328.329	352.194	0.596216	1.65499e-08	6.04962e-07	B4galt5	2	167298444	167349183	-	4308	protein_coding	UDP-Gal:betaGlcNAc beta 1,4-galactosyltransferase, polypeptide 5 [Source:MGI Symbol;Acc:MGI:1927169]	-	477	527	530	602	358	313	348	24.2184	22.6172	25.5865	24.9453	14.5978	14.0008	14.6353
ENSMUSG00000032492	63.3901	61.838	66.373	87.0178	45.8984	29.3712	47.5664	0.595439	0.00614663	0.0387845	Pth1r	9	110722085	110747145	-	2925	protein_coding	parathyroid hormone 1 receptor [Source:MGI Symbol;Acc:MGI:97801]	-	55	67	67	97	48	28	47	2.56632	2.64255	2.97256	3.6939	1.79874	1.15103	1.81652
ENSMUSG00000026104	482.917	483.629	563.675	505.959	354.756	344.063	288.434	0.595167	5.10005e-07	1.35358e-05	Stat1	1	52119440	52161865	+	7105	protein_coding	signal transducer and activator of transcription 1 [Source:MGI Symbol;Acc:MGI:103063]	STAT	419	524	569	564	371	328	285	11.6935	12.3612	15.0991	12.8462	8.3154	8.06464	6.58825
ENSMUSG00000046417	139.458	136.597	125.811	113.033	90.8405	67.1343	81.9761	0.595043	0.000652668	0.00677909	Lrrc75a	11	62604884	62648523	-	2089	protein_coding	leucine rich repeat containing 75A [Source:MGI Symbol;Acc:MGI:2682293]	-	121	148	127	126	95	64	81	7.71677	7.97834	7.70126	6.55823	4.86578	3.59593	4.27888
ENSMUSG00000026837	245.492	263.965	278.37	228.758	186.462	148.954	150.796	0.594581	3.25303e-05	0.000543811	Col5a1	2	27886425	28039514	+	8490	protein_coding	collagen, type V, alpha 1 [Source:MGI Symbol;Acc:MGI:88457]	-	213	286	281	255	195	142	149	3.06338	3.47687	3.8427	2.99315	2.25235	1.79925	1.77502
ENSMUSG00000109321	322.713	299.038	408.144	359.733	193.156	245.46	227.711	0.594376	3.13613e-05	0.000527204	A330076H08Rik	7	61930137	61982358	-	4448	processed_transcript	RIKEN cDNA A330076H08 gene [Source:MGI Symbol;Acc:MGI:2443193]	-	280	324	412	401	202	234	225	10.3679	10.141	14.5057	12.1184	6.0071	7.63364	6.901
ENSMUSG00000028804	734.172	655.298	765.766	686.274	442.728	477.283	467.567	0.594326	5.11713e-09	2.0538e-07	Csmd2	4	127987857	128567656	+	17077	protein_coding	CUB and Sushi multiple domains 2 [Source:MGI Symbol;Acc:MGI:2386401]	-	637	710	773	765	463	455	462	9.18276	8.65152	10.5955	9.00039	5.36035	5.77865	5.51659
ENSMUSG00000030966	58.7799	76.6053	96.0922	88.812	49.7232	48.2528	46.5543	0.594302	0.00398574	0.0277861	Trim21	7	102557921	102565486	-	3714	protein_coding	tripartite motif-containing 21 [Source:MGI Symbol;Acc:MGI:106657]	-	51	83	97	99	52	46	46	2.33796	3.21621	4.22811	3.70397	1.91447	1.85783	1.7467
ENSMUSG00000030796	136.001	156.902	169.4	203.64	115.702	105.946	91.0845	0.594183	0.000555655	0.00593462	Tead2	7	45215753	45233644	+	4788	protein_coding	TEA domain family member 2 [Source:MGI Symbol;Acc:MGI:104904]	TEA	118	170	171	227	121	101	90	9.24208	11.2548	12.7348	14.5104	7.61118	6.96932	5.83882
ENSMUSG00000034450	375.73	452.248	420.032	489.811	276.346	300.006	266.169	0.593589	2.06562e-06	4.83436e-05	Gulo	14	65986786	66009207	-	2263	protein_coding	gulonolactone (L-) oxidase [Source:MGI Symbol;Acc:MGI:1353434]	-	326	490	424	546	289	286	263	9.79356	12.4428	12.1115	13.3869	6.97268	7.56955	6.54446
ENSMUSG00000055447	2492.96	2114.49	2262.62	2099.19	1459.19	1394.09	1545.4	0.592999	8.06826e-11	4.39269e-09	Cd47	16	49800533	49915010	+	6276	protein_coding	CD47 antigen (Rh-related antigen, integrin-associated signal transducer) [Source:MGI Symbol;Acc:MGI:96617]	-	2163	2291	2284	2340	1526	1329	1527	86.8062	77.7176	87.1561	76.6436	49.1844	46.9894	50.7607
ENSMUSG00000026879	160.204	176.284	135.718	166.859	119.527	72.3791	106.265	0.5902	0.000974717	0.0093284	Gsn	2	35256380	35307892	+	3157	protein_coding	gelsolin [Source:MGI Symbol;Acc:MGI:95851]	-	139	191	137	186	125	69	105	6.48579	7.53324	6.07822	7.08316	4.68421	2.83647	4.05819
ENSMUSG00000053931	1991.6	2002.81	2122.94	2013.07	1455.36	1248.28	1302.51	0.58939	3.56081e-12	2.5464e-10	Cnn3	3	121426497	121458207	+	3037	protein_coding	calponin 3, acidic [Source:MGI Symbol;Acc:MGI:1919244]	-	1728	2170	2143	2244	1522	1190	1287	110.203	116.98	129.951	116.799	77.955	66.8618	67.9867
ENSMUSG00000052062	167.119	152.288	151.568	183.904	104.228	108.044	100.193	0.588438	0.000164423	0.00214714	Pard3b	1	61638824	62642284	+	13153	protein_coding	par-3 family cell polarity regulator beta [Source:MGI Symbol;Acc:MGI:1919301]	-	145	165	153	205	109	103	99	2.14624	2.06441	2.15333	2.47646	1.29574	1.34316	1.21378
ENSMUSG00000032440	195.933	199.358	165.437	205.434	129.089	97.5545	137.639	0.587463	0.000250415	0.00303614	Tgfbr2	9	116084293	116175360	-	8187	protein_coding	transforming growth factor, beta receptor II [Source:MGI Symbol;Acc:MGI:98729]	-	170	216	167	229	135	93	136	1.99815	2.14602	1.86639	2.19675	1.27436	0.963038	1.32408
ENSMUSG00000041577	863.258	702.369	756.85	928.489	474.283	563.299	546.507	0.58745	1.12602e-06	2.83013e-05	Prelp	1	133910304	133921414	-	3615	protein_coding	proline arginine-rich end leucine-rich repeat [Source:MGI Symbol;Acc:MGI:2151110]	-	749	761	764	1035	496	537	540	22.9473	19.7077	22.2562	25.8795	12.2042	14.4946	13.7037
ENSMUSG00000057969	223.594	230.739	205.063	261.053	150.126	137.415	155.856	0.587269	4.23003e-05	0.000678197	Sema3b	9	107597674	107609229	-	4777	protein_coding	sema domain, immunoglobulin domain (Ig), short basic domain, secreted, (semaphorin) 3B [Source:MGI Symbol;Acc:MGI:107561]	-	194	250	207	291	157	131	154	7.84121	8.54126	7.95536	9.59932	5.09636	4.66481	5.15581
ENSMUSG00000039497	59.9324	83.9889	65.3823	90.6061	51.6357	29.3712	51.6146	0.586107	0.0078747	0.0462549	Dse	10	34151393	34207715	-	4980	protein_coding	dermatan sulfate epimerase [Source:MGI Symbol;Acc:MGI:2443455]	-	52	91	66	101	54	28	51	2.58798	3.82824	3.12326	4.10246	2.15839	1.22771	2.10243
ENSMUSG00000026471	137.153	117.215	110.952	139.049	86.0594	75.5261	75.9038	0.585994	0.000693671	0.00712194	Mr1	1	155127277	155146814	-	5981	protein_coding	major histocompatibility complex, class I-related [Source:MGI Symbol;Acc:MGI:1195463]	-	119	127	112	155	90	72	75	3.27667	2.95591	2.93233	3.48325	1.99025	1.74663	1.71058
ENSMUSG00000003534	2788.01	2907.31	2885.74	3016.92	2069.25	1750.74	1914.8	0.585181	2.61796e-12	1.92565e-10	Ddr1	17	35681567	35704621	-	4774	protein_coding	discoidin domain receptor family, member 1 [Source:MGI Symbol;Acc:MGI:99216]	-	2419	3150	2913	3363	2164	1669	1892	72.1604	79.4281	82.625	81.8759	51.8441	43.8632	46.7497
ENSMUSG00000003746	326.171	309.19	269.454	319.364	213.236	155.248	220.627	0.584309	6.08291e-05	0.000921953	Man1a	10	53904785	54076609	-	9647	protein_coding	mannosidase 1, alpha [Source:MGI Symbol;Acc:MGI:104677]	-	283	335	272	356	223	148	218	6.87371	6.8778	6.28176	7.05701	4.34999	3.16699	4.38587
ENSMUSG00000026678	1996.21	1659.47	1635.55	1806.74	1101.56	1118.21	1273.16	0.583997	7.2021e-09	2.81015e-07	Rgs5	1	169655501	169695813	+	4546	protein_coding	regulator of G-protein signaling 5 [Source:MGI Symbol;Acc:MGI:1098434]	-	1732	1798	1651	2014	1152	1066	1258	48.8786	42.8905	44.3022	46.387	26.1097	26.5038	29.4067
ENSMUSG00000002147	206.306	167.978	185.25	203.64	122.396	127.975	116.386	0.583571	9.41972e-05	0.00133139	Stat6	10	127642986	127660957	+	4402	protein_coding	signal transducer and activator of transcription 6 [Source:MGI Symbol;Acc:MGI:103034]	STAT	179	182	187	227	128	122	115	9.82969	8.44809	9.76419	10.1737	5.64515	5.90239	5.23094
ENSMUSG00000053279	1313.9	1415.81	1207.59	1395.87	980.121	843.374	802.556	0.582627	1.37815e-08	5.08833e-07	Aldh1a1	19	20492715	20643462	+	4934	protein_coding	aldehyde dehydrogenase family 1, subfamily A1 [Source:MGI Symbol;Acc:MGI:1353450]	-	1140	1534	1219	1556	1025	804	793	66.3544	75.4728	67.4646	73.9163	47.9145	41.2289	38.2325
ENSMUSG00000005413	70.3054	71.0676	120.858	71.7672	53.5481	44.0569	51.6146	0.582068	0.00712253	0.0432026	Hmox1	8	75093621	75100589	+	1751	protein_coding	heme oxygenase 1 [Source:MGI Symbol;Acc:MGI:96163]	-	61	77	122	80	56	42	51	3.54144	3.77869	6.7347	3.79059	2.61106	2.14823	2.45254
ENSMUSG00000024451	54.1697	72.9135	66.373	68.1789	39.2048	45.1058	34.4097	0.580807	0.00581177	0.0373367	Arap3	18	37972624	37997574	-	5224	protein_coding	ArfGAP with RhoGAP domain, ankyrin repeat and PH domain 3 [Source:MGI Symbol;Acc:MGI:2147274]	-	47	79	67	76	41	43	34	0.611649	0.869024	0.829062	0.807205	0.428516	0.493008	0.366503
ENSMUSG00000026836	274.306	284.27	323.94	253.877	184.55	218.186	143.711	0.580338	0.000160999	0.00210856	Acvr1	2	58388644	58567157	-	4829	protein_coding	activin A receptor, type 1 [Source:MGI Symbol;Acc:MGI:87911]	-	238	308	327	283	193	208	142	6.54275	7.15706	8.5475	6.34945	4.26108	5.03765	3.23345
ENSMUSG00000032368	215.526	250.121	126.802	204.537	100.403	117.485	150.796	0.579658	0.003124	0.0232731	Zic1	9	91358058	91365810	-	5693	protein_coding	zinc finger protein of the cerebellum 1 [Source:MGI Symbol;Acc:MGI:106683]	zf-C2H2	187	271	128	228	105	112	149	4.32858	5.30241	2.81722	4.30729	1.95196	2.28403	2.85683
ENSMUSG00000044548	72.6105	68.2987	56.4665	78.0469	44.9421	49.3017	29.3495	0.579142	0.00732249	0.0441924	Dact1	12	71309884	71320107	+	3761	protein_coding	dishevelled-binding antagonist of beta-catenin 1 [Source:MGI Symbol;Acc:MGI:1891740]	-	63	74	57	87	47	47	29	1.40472	1.3947	1.20846	1.5832	0.841641	0.923271	0.535603
ENSMUSG00000006356	469.087	541.775	565.656	509.547	401.611	330.427	285.398	0.579023	9.60333e-06	0.000187702	Crip2	12	113140236	113145506	+	2099	protein_coding	cysteine rich protein 2 [Source:MGI Symbol;Acc:MGI:1915587]	-	407	587	571	568	420	315	282	36.697	44.7378	48.9531	41.7975	30.4134	25.0223	21.0611
ENSMUSG00000044022	260.476	200.281	240.726	235.038	130.045	169.934	151.808	0.578791	0.000113213	0.00156338	Pcdhb21	18	37513621	37518325	+	4705	protein_coding	protocadherin beta 21 [Source:MGI Symbol;Acc:MGI:2136759]	-	226	217	243	262	136	162	150	3.26555	2.65038	3.33858	3.08969	1.57821	2.06226	1.79529
ENSMUSG00000048058	109.492	115.369	124.821	114.828	92.7529	62.9384	61.7351	0.57846	0.00173107	0.0146115	Ldlrad3	2	101950203	102186385	-	6023	protein_coding	low density lipoprotein receptor class A domain containing 3 [Source:MGI Symbol;Acc:MGI:2138856]	-	95	125	126	128	97	60	61	1.96128	2.18135	2.4734	2.15671	1.6083	1.09131	1.04313
ENSMUSG00000001555	118.712	100.602	86.1858	133.666	79.3659	60.8404	63.7592	0.575966	0.00296626	0.0223033	Fkbp10	11	100415697	100424824	+	2935	protein_coding	FK506 binding protein 10 [Source:MGI Symbol;Acc:MGI:104769]	-	103	109	87	149	83	58	63	5.39889	4.82941	4.33605	6.37411	3.49401	2.67841	2.73529
ENSMUSG00000025915	121.017	133.829	114.914	121.107	59.2854	83.9178	89.0604	0.575925	0.00137551	0.0122835	Sgk3	1	9798107	9900845	+	14311	protein_coding	serum/glucocorticoid regulated kinase 3 [Source:MGI Symbol;Acc:MGI:2182368]	-	105	145	116	135	62	80	88	2.41323	2.81694	2.53498	2.53226	1.14441	1.61987	1.67528
ENSMUSG00000029545	74.9156	102.448	90.1483	104.96	69.8038	52.4487	50.6025	0.574392	0.00365029	0.026076	Acads	5	115110299	115119346	-	2269	protein_coding	acyl-Coenzyme A dehydrogenase, short chain [Source:MGI Symbol;Acc:MGI:87868]	-	65	111	91	117	73	50	50	3.48774	5.03448	4.6428	5.12369	3.14581	2.36364	2.22226
ENSMUSG00000058325	571.663	465.17	473.526	537.357	285.909	372.385	346.121	0.57382	6.96462e-06	0.000141022	Dock1	7	134670654	135173639	+	9330	protein_coding	dedicator of cytokinesis 1 [Source:MGI Symbol;Acc:MGI:2429765]	-	496	504	478	599	299	355	342	10.1812	8.74476	9.32938	10.0348	4.9291	6.41988	5.81484
ENSMUSG00000028970	51.8646	63.6839	57.4572	79.8411	40.1611	39.861	34.4097	0.57224	0.00817053	0.0475585	Abcb1b	5	8798147	8866315	+	7990	protein_coding	ATP-binding cassette, sub-family B (MDR/TAP), member 1B [Source:MGI Symbol;Acc:MGI:97568]	-	45	69	58	89	42	38	34	1.92893	2.50008	2.36396	3.11358	1.44588	1.43506	1.2072
ENSMUSG00000050323	147.526	183.668	190.203	159.682	113.79	122.73	91.0845	0.570879	0.000532092	0.00572809	Ndufaf6	4	11051045	11076205	-	1235	protein_coding	NADH:ubiquinone oxidoreductase complex assembly factor 6 [Source:MGI Symbol;Acc:MGI:1924197]	-	128	199	192	178	119	117	90	14.4791	19.0277	20.651	16.4331	10.8108	11.66	8.43277
ENSMUSG00000031119	104.882	99.6792	79.2513	121.107	70.76	54.5466	63.7592	0.570321	0.00326212	0.0239848	Gpc4	X	52053021	52165252	-	2651	protein_coding	glypican 4 [Source:MGI Symbol;Acc:MGI:104902]	-	91	108	80	135	74	52	63	2.33367	2.34111	1.95072	2.82551	1.52408	1.17485	1.33824
ENSMUSG00000001663	273.154	392.256	428.948	383.058	314.595	206.648	181.157	0.569324	0.00141618	0.0125719	Gstt1	10	75783813	75798584	-	1528	protein_coding	glutathione S-transferase, theta 1 [Source:MGI Symbol;Acc:MGI:107379]	-	237	425	433	427	329	197	179	18.5198	28.0723	32.1724	27.2322	20.6473	13.5624	11.5861
ENSMUSG00000007021	746.85	943.26	977.763	788.543	672.22	585.327	427.085	0.569127	9.41298e-05	0.00133139	Syngr3	17	24685092	24689955	-	2071	protein_coding	synaptogyrin 3 [Source:MGI Symbol;Acc:MGI:1341881]	-	648	1022	987	879	703	558	422	37.6849	50.2394	54.578	41.7203	32.8343	28.5896	20.3283
ENSMUSG00000044197	465.629	471.63	441.826	488.017	289.733	314.692	322.844	0.568849	1.62656e-07	4.9766e-06	Gpr146	5	139377697	139396415	+	6786	protein_coding	G protein-coupled receptor 146 [Source:MGI Symbol;Acc:MGI:1933113]	-	404	511	446	544	303	300	319	11.4012	12.1897	11.9678	12.5296	6.8674	7.45887	7.45686
ENSMUSG00000064373	562.443	519.624	501.264	664.744	375.793	373.434	361.302	0.56836	3.01141e-06	6.75824e-05	Selenop	15	3268547	3280508	+	2842	protein_coding	selenoprotein P [Source:MGI Symbol;Acc:MGI:894288]	-	488	563	506	741	393	356	357	33.4101	32.5812	32.9395	41.404	21.6087	21.4728	20.2452
ENSMUSG00000015027	141.763	145.827	189.212	193.772	97.534	94.4076	128.53	0.567875	0.00121321	0.0111547	Galns	8	122578242	122611463	-	2650	protein_coding	galactosamine (N-acetyl)-6-sulfate sulfatase [Source:MGI Symbol;Acc:MGI:1355303]	-	123	158	191	216	102	90	127	4.96854	5.39487	7.33609	7.12103	3.30904	3.20293	4.24934
ENSMUSG00000014361	240.882	170.747	202.091	209.022	137.695	122.73	137.639	0.567807	0.000244584	0.00297613	Mertk	2	128698956	128802894	+	4336	protein_coding	c-mer proto-oncogene tyrosine kinase [Source:MGI Symbol;Acc:MGI:96965]	-	209	185	204	233	144	117	136	4.03312	3.01764	3.74311	3.66958	2.2317	1.98912	2.17385
ENSMUSG00000020205	104.882	95.0644	102.036	112.136	68.8475	55.5956	71.8556	0.567562	0.00178349	0.0149574	Phlda1	10	111506286	111508645	+	2205	protein_coding	pleckstrin homology like domain, family A, member 1 [Source:MGI Symbol;Acc:MGI:1096880]	-	91	103	103	125	72	53	71	5.35632	5.12464	5.76462	6.00484	3.40359	2.74842	3.46161
ENSMUSG00000002233	316.95	388.564	410.125	378.572	267.74	252.802	214.555	0.567103	2.07406e-05	0.000367881	Rhoc	3	104788375	104794459	+	1618	protein_coding	ras homolog family member C [Source:MGI Symbol;Acc:MGI:106028]	-	275	421	414	422	280	241	212	24.7953	32.0862	35.4931	31.0538	20.2756	19.1441	15.8331
ENSMUSG00000027546	4949.04	3741.66	4470.76	5109.83	2809.36	2778.73	3455.14	0.567042	1.72307e-06	4.09111e-05	Atp9a	2	168634438	168742409	-	5917	protein_coding	ATPase, class II, type 9A [Source:MGI Symbol;Acc:MGI:1330826]	-	4294	4054	4513	5696	2938	2649	3414	136.668	109.066	136.578	147.959	75.0995	74.2795	90.0046
ENSMUSG00000051855	1444.14	1301.37	1382.94	1342.94	924.661	853.864	959.424	0.56633	8.20462e-11	4.4401e-09	Mest	6	30723547	30748465	+	3945	protein_coding	mesoderm specific transcript [Source:MGI Symbol;Acc:MGI:96968]	-	1253	1410	1396	1497	967	814	948	79.8351	75.9386	84.5739	77.845	49.4821	45.6929	50.0318
ENSMUSG00000019066	155.594	137.52	137.699	132.769	83.1908	73.4281	112.338	0.566108	0.00122877	0.0112735	Rab3d	9	21907491	21918192	-	4196	protein_coding	RAB3D, member RAS oncogene family [Source:MGI Symbol;Acc:MGI:97844]	-	135	149	139	148	87	70	111	4.88964	4.56173	4.78703	4.37493	2.5307	2.23369	3.33013
ENSMUSG00000022500	66.8477	70.1446	90.1483	69.076	32.5113	53.4976	49.5905	0.566097	0.00774561	0.0458349	Litaf	16	10959275	11066157	-	5156	protein_coding	LPS-induced TN factor [Source:MGI Symbol;Acc:MGI:1929512]	zf-LITAF-like	58	76	91	77	34	51	49	3.06378	3.39346	4.57065	3.3196	1.4424	2.37345	2.14398
ENSMUSG00000060890	4719.68	7311.65	7595.25	5112.52	4027.58	4530.51	3509.79	0.565198	0.000153364	0.00202623	Arr3	X	100605497	100618493	+	2355	protein_coding	arrestin 3, retinal [Source:MGI Symbol;Acc:MGI:2159617]	-	4095	7922	7667	5699	4212	4319	3468	292.125	477.694	520.053	331.802	241.314	271.443	204.922
ENSMUSG00000028641	154.441	181.822	189.212	192.874	109.965	140.562	97.1568	0.565048	0.000582905	0.0061755	P3h1	4	119232915	119248975	+	3846	protein_coding	prolyl 3-hydroxylase 1 [Source:MGI Symbol;Acc:MGI:1888921]	-	134	197	191	215	115	134	96	5.28108	6.56274	7.15747	6.91549	3.63995	4.65269	3.1339
ENSMUSG00000014303	402.239	481.783	525.04	430.603	368.143	275.88	257.061	0.563431	9.17762e-05	0.00130743	Glis2	16	4594713	4624924	+	4373	protein_coding	GLIS family zinc finger 2 [Source:MGI Symbol;Acc:MGI:1932535]	zf-C2H2	349	522	530	480	385	263	254	13.307	16.8239	19.215	14.937	11.7895	8.83472	8.02204
ENSMUSG00000031274	301.967	421.791	417.06	268.23	242.879	239.166	199.374	0.563164	0.000607105	0.00637938	Col4a5	X	141475385	141689234	+	6718	protein_coding	collagen, type IV, alpha 5 [Source:MGI Symbol;Acc:MGI:88456]	-	262	457	421	299	254	228	197	4.17628	6.15751	6.38085	3.88979	3.25163	3.20187	2.60106
ENSMUSG00000032231	200.543	253.813	267.473	213.508	170.206	122.73	160.916	0.56306	0.000402789	0.00455374	Anxa2	9	69453620	69491795	+	3731	protein_coding	annexin A2 [Source:MGI Symbol;Acc:MGI:88246]	-	174	275	270	238	178	117	159	10.4499	13.9603	15.4182	11.6655	8.58539	6.19053	7.90957
ENSMUSG00000043671	651.189	539.006	524.049	570.55	371.968	368.19	395.712	0.56277	6.25406e-07	1.63577e-05	Dpy19l3	7	35685165	35754454	-	11367	protein_coding	dpy-19-like 3 (C. elegans) [Source:MGI Symbol;Acc:MGI:2443952]	-	565	584	529	636	389	351	391	25.8139	22.5537	22.981	23.7152	14.2736	14.1284	14.7971
ENSMUSG00000052911	558.985	392.256	384.369	533.769	299.296	266.439	345.109	0.562266	0.000240273	0.00293955	Lamb2	9	108479736	108490530	+	6082	protein_coding	laminin, beta 2 [Source:MGI Symbol;Acc:MGI:99916]	-	485	425	388	595	313	254	341	27.9426	20.6974	21.2552	27.9775	14.4827	12.8926	16.2733
ENSMUSG00000052125	112.95	83.066	104.017	84.3265	56.4167	70.2812	53.6387	0.562204	0.00378966	0.0267713	F730043M19Rik	12	33111711	33147597	-	4610	bidirectional_promoter_lncRNA	RIKEN cDNA F730043M19 gene [Source:MGI Symbol;Acc:MGI:2443237]	-	98	90	105	94	59	67	53	4.82436	3.74504	4.91486	3.77666	2.33262	2.90583	2.16115
ENSMUSG00000052397	217.831	260.273	239.735	225.17	197.937	115.387	141.687	0.56051	0.000841297	0.00828471	Ezr	17	6738041	6782784	-	3290	protein_coding	ezrin [Source:MGI Symbol;Acc:MGI:98931]	-	189	282	242	251	207	110	140	6.75197	8.51566	8.22038	7.31827	5.93906	3.46212	4.14278
ENSMUSG00000066894	80.6783	76.6053	79.2513	83.4294	48.767	44.0569	57.6869	0.560452	0.00397912	0.0277507	Vsig10	5	117319083	117355005	+	5305	protein_coding	V-set and immunoglobulin domain containing 10 [Source:MGI Symbol;Acc:MGI:2448533]	-	70	83	80	93	51	42	57	1.88471	1.88897	2.04807	2.0436	1.1028	0.996269	1.27121
ENSMUSG00000039115	365.357	225.201	294.22	348.968	144.389	165.738	272.242	0.560098	0.00354155	0.0254508	Itga9	9	118606690	118901003	+	7691	protein_coding	integrin alpha 9 [Source:MGI Symbol;Acc:MGI:104756]	-	317	244	297	389	151	158	269	11.3846	7.40708	10.1419	11.4018	4.35525	4.99914	8.0021
ENSMUSG00000040659	978.512	1026.33	963.894	1028.96	731.505	664	610.266	0.559785	4.99381e-09	2.01327e-07	Efhd2	4	141858142	141874920	-	2381	protein_coding	EF hand domain containing 2 [Source:MGI Symbol;Acc:MGI:106504]	-	849	1112	973	1147	765	633	603	24.2413	26.8382	26.4161	26.7287	17.5424	15.9233	14.2613
ENSMUSG00000040717	133.695	71.0676	88.1671	120.21	65.0227	65.0363	60.723	0.559194	0.00705844	0.0429295	Il17rd	14	27038941	27107286	+	10985	protein_coding	interleukin 17 receptor D [Source:MGI Symbol;Acc:MGI:2159727]	-	116	77	89	134	68	62	60	2.08794	1.17153	1.5232	1.96848	0.982988	0.983181	0.894554
ENSMUSG00000035835	510.578	484.552	536.927	514.93	370.056	336.72	315.76	0.559002	2.73452e-07	7.85945e-06	Plppr3	10	79860475	79874634	-	4357	protein_coding	phospholipid phosphatase related 3 [Source:MGI Symbol;Acc:MGI:2388640]	-	443	525	542	574	387	321	312	19.5184	19.5525	22.7064	20.6405	13.694	12.4603	11.3865
ENSMUSG00000055723	118.712	102.448	118.877	116.622	84.147	74.4771	59.711	0.558734	0.00184734	0.0153698	Rras2	7	114046782	114117781	-	3554	protein_coding	related RAS viral (r-ras) oncogene 2 [Source:MGI Symbol;Acc:MGI:1914172]	-	103	111	120	130	88	71	59	2.41128	2.19652	2.67116	2.48382	1.65452	1.46437	1.14408
ENSMUSG00000027878	1132.95	850.965	748.925	923.106	473.327	601.062	717.544	0.55766	0.000207294	0.00260687	Notch2	3	98013527	98150361	+	10782	protein_coding	notch 2 [Source:MGI Symbol;Acc:MGI:97364]	-	983	922	756	1029	495	573	709	10.7822	8.54845	7.88471	9.21165	4.36054	5.53722	6.44165
ENSMUSG00000039007	260.476	287.039	212.988	264.642	194.112	142.66	164.964	0.557203	0.00025306	0.00306479	Cpq	15	33083129	33594552	+	5026	protein_coding	carboxypeptidase Q [Source:MGI Symbol;Acc:MGI:1889205]	-	226	311	215	295	203	136	163	8.95362	10.4148	8.0991	9.53846	6.459	4.7469	5.349
ENSMUSG00000023972	247.798	267.657	249.642	274.51	182.637	185.668	145.735	0.556999	5.28383e-05	0.000815938	Ptk7	17	46564471	46629504	-	5384	protein_coding	PTK7 protein tyrosine kinase 7 [Source:MGI Symbol;Acc:MGI:1918711]	-	215	290	252	306	191	177	144	4.1442	4.72499	4.6186	4.81382	2.95675	3.00577	2.29911
ENSMUSG00000030089	155.594	168.901	165.437	162.373	129.089	86.0158	101.205	0.556807	0.00073491	0.00743199	Slc41a3	6	90604725	90646412	+	2911	protein_coding	solute carrier family 41, member 3 [Source:MGI Symbol;Acc:MGI:1918949]	-	135	183	167	181	135	82	100	3.87578	4.44096	4.5588	4.24102	3.11271	2.07406	2.37805
ENSMUSG00000020092	163.662	156.902	175.343	163.27	131.958	97.5545	90.0725	0.55615	0.000767098	0.00771421	Pald1	10	61319656	61383530	-	4535	protein_coding	phosphatase domain containing, paladin 1 [Source:MGI Symbol;Acc:MGI:1351623]	-	142	170	177	182	138	93	89	5.38413	5.44849	6.38129	5.63202	4.20228	3.10664	2.79519
ENSMUSG00000019122	72.6105	95.0644	81.2326	78.0469	58.3292	48.2528	47.5664	0.555502	0.00478426	0.0320867	Ccl9	11	83572919	83578636	-	3045	protein_coding	chemokine (C-C motif) ligand 9 [Source:MGI Symbol;Acc:MGI:104533]	-	63	103	82	87	61	46	47	2.51645	3.47765	3.11437	2.83618	1.95685	1.61878	1.55504
ENSMUSG00000041974	194.78	176.284	187.231	167.756	103.271	101.75	147.759	0.555437	0.000729264	0.00739149	Spidr	16	15889224	16146851	-	6952	protein_coding	scaffolding protein involved in DNA repair [Source:MGI Symbol;Acc:MGI:1924834]	-	169	191	189	187	108	97	146	2.38764	2.28095	2.53893	2.1562	1.22542	1.20735	1.70856
ENSMUSG00000034917	68.0003	97.8333	101.045	88.812	49.7232	56.6445	61.7351	0.554998	0.00501909	0.03329	Tjp3	10	81273207	81291581	-	3714	protein_coding	tight junction protein 3 [Source:MGI Symbol;Acc:MGI:1351650]	-	59	106	102	99	52	54	61	2.91502	4.42686	4.79178	3.992	2.06334	2.35052	2.4964
ENSMUSG00000031596	877.088	736.518	709.299	729.335	487.67	498.262	543.471	0.554235	3.68476e-07	1.01379e-05	Slc7a2	8	40862396	40922308	+	9135	protein_coding	solute carrier family 7 (cationic amino acid transporter, y+ system), member 2 [Source:MGI Symbol;Acc:MGI:99828]	-	761	798	716	813	510	475	537	11.05	9.79443	9.88546	9.63458	5.94737	6.07646	6.4587
ENSMUSG00000047139	233.967	222.432	205.063	218.89	182.637	115.387	130.555	0.553905	0.000607677	0.00638167	Cd24a	10	43578284	43584265	+	2580	protein_coding	CD24a antigen [Source:MGI Symbol;Acc:MGI:88323]	-	203	241	207	244	191	110	129	13.2191	13.2655	12.817	12.9677	9.98894	6.31075	6.95811
ENSMUSG00000034714	1257.43	1011.56	967.856	1090.86	717.162	679.735	772.195	0.553394	5.31662e-07	1.40485e-05	Ttyh2	11	114675431	114720977	+	3739	protein_coding	tweety family member 2 [Source:MGI Symbol;Acc:MGI:2157091]	-	1091	1096	977	1216	750	648	763	35.4884	30.1351	30.2179	32.282	19.593	18.5702	20.558
ENSMUSG00000069833	934.716	738.364	704.346	832.5	413.085	491.968	674.026	0.553013	0.000233707	0.00287681	Ahnak	19	8989284	9076919	+	18543	protein_coding	AHNAK nucleoprotein (desmoyokin) [Source:MGI Symbol;Acc:MGI:1316648]	-	811	800	711	928	432	469	666	5.76004	4.80281	4.80156	5.37921	2.46415	2.93467	3.91809
ENSMUSG00000037003	463.324	443.942	404.182	375.881	307.901	223.431	303.615	0.552987	5.83995e-05	0.000891879	Tns2	15	102100413	102116401	+	5452	protein_coding	tensin 2 [Source:MGI Symbol;Acc:MGI:2387586]	-	402	481	408	419	322	213	300	11.7194	11.8529	11.3096	9.96917	7.539	5.47066	7.24428
ENSMUSG00000032334	126.78	196.59	122.84	181.212	112.833	95.4565	92.0966	0.551847	0.00323574	0.0238687	Loxl1	9	58287738	58313186	-	3297	protein_coding	lysyl oxidase-like 1 [Source:MGI Symbol;Acc:MGI:106096]	-	110	213	124	202	118	91	91	2.2682	3.71252	2.43119	3.39943	1.95411	1.65315	1.55426
ENSMUSG00000052920	555.528	473.476	568.628	590.286	340.413	395.463	360.29	0.551769	2.42168e-06	5.5172e-05	Prkg1	19	30567551	31765033	-	7799	protein_coding	protein kinase, cGMP-dependent, type I [Source:MGI Symbol;Acc:MGI:108174]	-	482	513	574	658	356	377	356	19.3781	17.4334	21.9424	21.5902	11.4946	13.3532	11.8552
ENSMUSG00000109572	89.8987	62.761	101.045	77.1498	50.6794	52.4487	51.6146	0.550918	0.00689487	0.0422197	Cfap99	5	34288600	34327327	+	2123	protein_coding	cilia and flagella associated protein 99 [Source:MGI Symbol;Acc:MGI:5434801]	-	78	68	102	86	53	50	51	2.49777	1.84063	3.10574	2.24762	1.36305	1.41062	1.35277
ENSMUSG00000023963	114.102	136.597	118.877	129.181	71.7162	77.624	93.1086	0.550339	0.00144063	0.0127014	Cyp39a1	17	43667425	43751431	+	3053	protein_coding	cytochrome P450, family 39, subfamily a, polypeptide 1 [Source:MGI Symbol;Acc:MGI:1927096]	-	99	148	120	144	75	74	92	3.30896	4.18137	3.81369	3.92812	2.01325	2.17906	2.54706
ENSMUSG00000074415	323.866	465.17	470.555	376.778	249.572	288.468	273.254	0.549484	0.000142348	0.00189878	3110039I08Rik	9	41327077	41716994	+	23898	processed_transcript	RIKEN cDNA 3110039I08 gene [Source:MGI Symbol;Acc:MGI:1920394]	-	281	504	475	420	261	275	270	12.9868	19.6891	20.8735	15.842	9.68755	11.1972	10.336
ENSMUSG00000041836	240.882	215.049	280.351	217.993	175.944	150.003	144.723	0.548575	0.000234785	0.00288809	Ptpre	7	135537481	135686293	+	10201	protein_coding	protein tyrosine phosphatase, receptor type, E [Source:MGI Symbol;Acc:MGI:97813]	-	209	233	283	243	184	143	143	3.92505	3.69875	5.05351	3.72453	2.77521	2.36601	2.22449
ENSMUSG00000031837	867.868	880.499	858.886	1119.57	665.526	564.347	640.628	0.547971	4.39658e-06	9.50009e-05	Necab2	8	119446719	119472640	+	2096	protein_coding	N-terminal EF-hand calcium binding protein 2 [Source:MGI Symbol;Acc:MGI:2152211]	-	753	954	867	1248	696	538	633	37.0957	39.7262	40.6121	50.1775	27.537	23.3503	25.8302
ENSMUSG00000029851	115.255	69.2217	90.1483	88.812	52.5919	47.2038	69.8315	0.546724	0.00824112	0.0478766	Tcaf2	6	42623016	42645254	-	4778	protein_coding	TRPM8 channel-associated factor 2 [Source:MGI Symbol;Acc:MGI:2385258]	-	100	75	91	99	55	45	69	2.51142	1.59214	2.17304	2.02918	1.10933	0.995664	1.43537
ENSMUSG00000054619	232.814	284.27	314.033	243.112	206.543	187.766	131.567	0.546713	0.000912851	0.00885386	Mettl7a1	15	100304140	100328662	+	2595	protein_coding	methyltransferase like 7A1 [Source:MGI Symbol;Acc:MGI:1916523]	-	202	308	317	271	216	179	130	16.7473	21.5846	24.9897	18.337	14.3822	13.0746	8.92754
ENSMUSG00000026389	133.695	131.06	170.39	143.534	80.3221	92.3096	109.301	0.54668	0.00149671	0.0131015	Steap3	1	120190757	120272705	-	5715	protein_coding	STEAP family member 3 [Source:MGI Symbol;Acc:MGI:1915678]	-	116	142	172	160	84	88	108	2.62872	2.72004	3.70615	2.95919	1.52878	1.75691	2.02724
ENSMUSG00000032374	298.51	302.729	395.266	352.557	224.711	233.921	214.555	0.546132	5.86865e-05	0.000894745	Plod2	9	92542223	92608428	+	5392	protein_coding	procollagen lysine, 2-oxoglutarate 5-dioxygenase 2 [Source:MGI Symbol;Acc:MGI:1347007]	-	259	328	399	393	235	223	212	8.78199	9.40086	12.8639	10.8756	6.39941	6.66161	5.95421
ENSMUSG00000032194	527.866	453.171	415.079	523.901	343.281	300.006	318.796	0.545946	1.06979e-05	0.000205092	Kank2	9	21766784	21798744	-	5235	protein_coding	KN motif and ankyrin repeat domains 2 [Source:MGI Symbol;Acc:MGI:2384568]	-	458	491	419	584	359	286	315	10.5298	9.54197	9.15963	10.9581	6.62872	5.793	5.99876
ENSMUSG00000068220	165.967	270.426	211.007	213.508	156.819	142.66	121.446	0.545509	0.00131101	0.0118036	Lgals1	15	78926725	78930465	+	903	protein_coding	lectin, galactose binding, soluble 1 [Source:MGI Symbol;Acc:MGI:96777]	-	144	293	213	238	164	136	120	13.7111	23.5818	19.284	18.4949	12.541	11.4085	9.46423
ENSMUSG00000022895	447.188	383.027	387.341	430.603	278.259	268.537	282.362	0.545091	2.60045e-06	5.9021e-05	Ets2	16	95702075	95721051	+	5780	protein_coding	E26 avian leukemia oncogene 2, 3' domain [Source:MGI Symbol;Acc:MGI:95456]	ETS	388	415	391	480	291	256	279	15.1076	13.6588	14.476	15.2535	9.09987	8.78181	8.99834
ENSMUSG00000075590	691.528	914.649	951.015	689.863	589.029	569.592	459.471	0.544563	9.63616e-05	0.00135985	Nrbp2	15	76085518	76091627	-	3894	protein_coding	nuclear receptor binding protein 2 [Source:MGI Symbol;Acc:MGI:2385017]	-	600	991	960	769	616	543	454	26.9066	37.5649	40.9343	28.145	22.1854	21.4531	16.8639
ENSMUSG00000024620	478.307	367.336	372.481	418.044	251.485	274.831	292.483	0.543742	2.96748e-05	0.000503075	Pdgfrb	18	61045150	61085061	+	5478	protein_coding	platelet derived growth factor receptor, beta polypeptide [Source:MGI Symbol;Acc:MGI:97531]	-	415	398	376	466	263	262	289	5.21023	4.22369	4.48854	4.77486	2.65182	2.89795	3.0054
ENSMUSG00000076435	111.797	132.906	99.0641	113.033	72.6724	56.6445	90.0725	0.543089	0.00412428	0.0284973	Acsf2	11	94557102	94601871	-	3432	protein_coding	acyl-CoA synthetase family member 2 [Source:MGI Symbol;Acc:MGI:2388287]	-	97	144	100	126	76	54	89	5.26294	6.60419	5.15898	5.57947	3.31168	2.58126	3.99983
ENSMUSG00000020101	79.5257	85.8349	82.2232	84.3265	52.5919	49.3017	57.6869	0.542004	0.00426352	0.0291952	Vsir	10	60346851	60372684	+	5014	protein_coding	V-set immunoregulatory receptor [Source:MGI Symbol;Acc:MGI:1921298]	-	69	93	83	94	55	47	57	2.55079	2.90609	2.91751	2.83609	1.63293	1.53075	1.7454
ENSMUSG00000022723	1217.09	977.41	1085.74	1104.32	755.411	739.526	730.7	0.541569	3.57931e-08	1.25005e-06	Crybg3	16	59490775	59600979	-	12711	protein_coding	beta-gamma crystallin domain containing 3 [Source:MGI Symbol;Acc:MGI:2676311]	-	1056	1059	1096	1231	790	705	722	18.4506	15.6402	18.2081	17.5538	11.0854	10.8522	10.4491
ENSMUSG00000027215	220.136	262.119	195.156	240.42	161.6	155.248	139.663	0.541553	0.000256656	0.00310207	Cd82	2	93419111	93463140	-	3005	protein_coding	CD82 antigen [Source:MGI Symbol;Acc:MGI:104651]	-	191	284	197	268	169	148	138	13.6972	17.2154	13.433	15.6856	9.7334	9.35065	8.19734
ENSMUSG00000025510	369.968	479.937	583.488	470.973	356.669	340.916	242.892	0.54134	0.00066895	0.00690843	Cd151	7	141467392	141471473	+	2741	protein_coding	CD151 antigen [Source:MGI Symbol;Acc:MGI:1096360]	-	321	520	589	525	373	325	240	22.3138	30.5543	38.9307	29.7847	20.8236	19.9037	13.8189
ENSMUSG00000028517	1266.65	1240.45	1389.87	1333.08	921.792	887.431	857.207	0.5413	3.51089e-10	1.74779e-08	Plpp3	4	105157347	105232764	+	3159	protein_coding	phospholipid phosphatase 3 [Source:MGI Symbol;Acc:MGI:1915166]	-	1099	1344	1403	1486	964	846	847	23.6513	24.4488	28.7094	26.1001	16.6615	16.0402	15.0986
ENSMUSG00000042035	545.155	382.104	372.481	416.25	261.047	217.137	362.314	0.540843	0.00132328	0.011899	Igsf3	3	101377083	101463059	+	8479	protein_coding	immunoglobulin superfamily, member 3 [Source:MGI Symbol;Acc:MGI:1926158]	-	473	414	376	464	273	207	358	7.36352	5.44785	5.5657	5.89533	3.41323	2.83907	4.61639
ENSMUSG00000024810	1169.84	1291.21	1151.13	1334.87	883.543	751.065	879.472	0.540114	8.08682e-08	2.65451e-06	Il33	19	29925114	29960718	+	2886	protein_coding	interleukin 33 [Source:MGI Symbol;Acc:MGI:1924375]	-	1015	1399	1162	1488	924	716	869	52.6747	61.3697	57.339	63.0239	38.5112	32.7364	37.3552
ENSMUSG00000033306	240.882	201.204	199.119	187.492	131.958	117.485	159.904	0.539861	0.00055367	0.00592147	Lpp	16	24393507	24992578	+	22046	protein_coding	LIM domain containing preferred translocation partner in lipoma [Source:MGI Symbol;Acc:MGI:2441849]	-	209	218	201	209	138	112	158	2.82254	2.48858	2.58106	2.3036	1.49676	1.33258	1.76745
ENSMUSG00000034551	170.577	110.755	160.484	152.505	87.9719	82.8689	116.386	0.539806	0.00335688	0.0244223	Hdx	X	111569931	111697079	-	9534	protein_coding	highly divergent homeobox [Source:MGI Symbol;Acc:MGI:2685226]	Homeobox	148	120	162	170	92	79	115	1.06371	0.729028	1.1071	0.997188	0.531042	0.500231	0.684628
ENSMUSG00000015647	716.884	621.149	790.532	756.247	440.816	510.85	508.049	0.539419	2.56375e-06	5.83351e-05	Lama5	2	180176373	180225859	-	11388	protein_coding	laminin, alpha 5 [Source:MGI Symbol;Acc:MGI:105382]	-	622	673	798	843	461	487	502	12.9632	11.856	15.8137	14.3389	7.7162	8.94198	8.66607
ENSMUSG00000030681	240.882	185.514	236.763	262.848	161.6	127.975	168	0.539214	0.000657228	0.0068186	Mvp	7	126986860	127014621	-	7627	protein_coding	major vault protein [Source:MGI Symbol;Acc:MGI:1925638]	-	209	201	239	293	169	122	166	5.24693	4.26536	5.70512	6.00333	3.40741	2.69836	3.45193
ENSMUSG00000071234	462.171	482.706	503.246	461.105	324.157	291.615	351.182	0.538935	1.47835e-06	3.58531e-05	Syndig1l	12	84677277	84698831	-	3080	protein_coding	synapse differentiation inducing 1 like [Source:MGI Symbol;Acc:MGI:2685107]	-	401	523	508	514	339	278	347	20.9705	23.1189	25.2601	21.9378	14.2378	12.8083	15.031
ENSMUSG00000038764	194.78	167.978	148.596	195.566	94.6654	137.415	115.374	0.538882	0.00142027	0.012602	Ptpn3	4	57190841	57301837	-	7238	protein_coding	protein tyrosine phosphatase, non-receptor type 3 [Source:MGI Symbol;Acc:MGI:105307]	-	169	182	150	218	99	131	114	7.50936	6.83578	6.33746	7.90567	3.53289	5.12824	4.19581
ENSMUSG00000031355	97.9665	104.294	101.045	109.445	58.3292	69.2322	73.8797	0.538157	0.00268461	0.0206132	Arhgap6	X	168795099	169304435	+	12128	protein_coding	Rho GTPase activating protein 6 [Source:MGI Symbol;Acc:MGI:1196332]	-	85	113	102	122	61	66	73	1.49745	1.68272	1.7086	1.75412	0.863061	1.02437	1.06525
ENSMUSG00000051242	455.256	491.935	438.854	524.798	366.231	295.81	302.603	0.537896	1.11531e-05	0.000212914	Pcdhb9	18	37400855	37403909	+	3055	protein_coding	protocadherin beta 9 [Source:MGI Symbol;Acc:MGI:2136744]	-	395	533	443	585	383	282	299	8.79009	10.0259	9.37363	10.6247	6.84501	5.52874	5.51141
ENSMUSG00000062031	103.729	100.602	125.811	98.68	66.9351	82.8689	57.6869	0.537833	0.00399834	0.0278367	Pgghg	7	140941391	140947664	+	3346	protein_coding	protein glucosylgalactosylhydroxylysine glucosidase [Source:MGI Symbol;Acc:MGI:2444047]	-	90	109	127	110	70	79	57	2.6092	2.67111	3.50087	2.6027	1.62983	2.01778	1.36878
ENSMUSG00000017466	2617.43	2353.54	2547.93	2911.06	1725.97	1763.32	1835.86	0.53767	3.29364e-09	1.36762e-07	Timp2	11	118301069	118355740	-	3896	protein_coding	tissue inhibitor of metalloproteinase 2 [Source:MGI Symbol;Acc:MGI:98753]	-	2271	2550	2572	3245	1805	1681	1814	69.7659	66.2166	75.1285	81.3592	44.533	45.4962	46.1592
ENSMUSG00000019960	297.357	255.659	347.715	339.997	184.55	179.374	252.001	0.536992	0.000568058	0.00603596	Dusp6	10	99263231	99267489	+	3132	protein_coding	dual specificity phosphatase 6 [Source:MGI Symbol;Acc:MGI:1914853]	-	258	277	351	379	193	171	249	10.3358	9.38006	13.3703	12.3917	6.20957	6.03536	8.26266
ENSMUSG00000037031	701.901	738.364	792.513	723.055	535.481	451.058	517.158	0.536961	1.93089e-07	5.78017e-06	Tspan15	10	62185396	62231251	-	8183	protein_coding	tetraspanin 15 [Source:MGI Symbol;Acc:MGI:1917673]	-	609	800	800	806	560	430	511	21.9641	24.3886	27.4343	23.7245	16.2205	13.663	15.2655
ENSMUSG00000032014	182.102	179.053	237.754	163.27	134.826	125.877	115.374	0.536659	0.00102128	0.00969682	Oaf	9	43221235	43239911	-	2629	protein_coding	out at first homolog [Source:MGI Symbol;Acc:MGI:94852]	-	158	194	240	182	141	120	114	9.60777	9.97167	13.8767	9.0324	6.88595	6.42877	5.74203
ENSMUSG00000062312	164.814	136.597	135.718	160.579	87.0156	95.4565	112.338	0.53545	0.00125532	0.01146	Erbb2	11	98412470	98437716	+	5210	protein_coding	erb-b2 receptor tyrosine kinase 2 [Source:MGI Symbol;Acc:MGI:95410]	-	143	148	137	179	91	91	111	2.96665	2.59533	2.70246	3.03075	1.51618	1.66323	1.90743
ENSMUSG00000021756	4061.58	3270.03	3296.85	3674.48	2093.16	2355.99	2808.44	0.535252	2.90226e-06	6.5214e-05	Il6st	13	112464070	112510086	+	11099	protein_coding	interleukin 6 signal transducer [Source:MGI Symbol;Acc:MGI:96560]	-	3524	3543	3328	4096	2189	2246	2775	84.2095	71.5644	75.6165	79.8824	42.0097	47.2842	54.9266
ENSMUSG00000024960	342.306	274.118	309.08	358.836	207.499	222.382	216.579	0.534983	5.99847e-05	0.000909919	Plcb3	19	6953714	6969759	-	4201	protein_coding	phospholipase C, beta 3 [Source:MGI Symbol;Acc:MGI:104778]	-	297	297	312	400	217	212	214	4.8063	4.06267	4.80084	5.283	2.82029	3.02254	2.86856
ENSMUSG00000045932	337.696	306.421	324.93	374.087	206.543	184.619	279.326	0.534945	0.000332435	0.00386754	Ifit2	19	34550694	34576419	+	3927	protein_coding	interferon-induced protein with tetratricopeptide repeats 2 [Source:MGI Symbol;Acc:MGI:99449]	-	293	332	328	417	216	176	276	8.81777	8.44559	9.38584	10.2422	5.22064	4.66643	6.88011
ENSMUSG00000026701	2078.04	2116.34	2111.06	2107.27	1568.19	1375.2	1370.32	0.534594	6.19152e-11	3.40175e-09	Prdx6	1	161240112	161251219	-	4804	protein_coding	peroxiredoxin 6 [Source:MGI Symbol;Acc:MGI:894320]	-	1803	2293	2131	2349	1640	1311	1354	96.9742	104.247	108.981	103.112	70.8407	62.1218	60.3218
ENSMUSG00000020282	127.933	148.596	161.475	145.329	90.8405	99.6524	99.1809	0.534138	0.000917638	0.00888118	Rhbdf1	11	32209585	32222300	-	5433	protein_coding	rhomboid 5 homolog 1 [Source:MGI Symbol;Acc:MGI:104328]	-	111	161	163	162	95	95	98	4.74905	5.82251	6.631	5.65672	3.26427	3.58087	3.473
ENSMUSG00000003420	147.526	141.212	122.84	148.02	101.359	69.2322	103.229	0.534076	0.00236885	0.0186496	Fcgrt	7	45092990	45103851	-	2102	protein_coding	Fc receptor, IgG, alpha chain transporter [Source:MGI Symbol;Acc:MGI:103017]	-	128	153	124	165	106	66	102	8.41583	8.50313	7.75205	8.85395	5.59721	3.82307	5.55497
ENSMUSG00000024197	169.424	142.135	150.577	182.109	112.833	101.75	105.253	0.532643	0.000824237	0.00814341	Plin3	17	56277476	56292873	-	3786	protein_coding	perilipin 3 [Source:MGI Symbol;Acc:MGI:1914155]	-	147	154	152	203	118	97	104	4.7521	4.20813	4.67218	5.35587	3.06358	2.76262	2.78482
ENSMUSG00000034771	542.85	659.913	886.624	531.078	469.502	472.038	357.254	0.532407	0.00110868	0.0103575	Tle2	10	81574561	81590845	+	6221	protein_coding	transducin-like enhancer of split 2 [Source:MGI Symbol;Acc:MGI:104635]	-	471	715	895	592	491	450	353	20.2277	25.9557	36.5475	20.7498	16.9351	17.0263	12.5573
ENSMUSG00000006435	2288.96	2046.19	2094.22	2462.51	1466.84	1539.89	1554.51	0.531087	5.1168e-09	2.0538e-07	Neurl1a	19	47178820	47259440	+	4411	protein_coding	neuralized E3 ubiquitin protein ligase 1A [Source:MGI Symbol;Acc:MGI:1334263]	-	1986	2217	2114	2745	1534	1468	1536	34.4606	32.5169	34.8783	38.8733	21.377	22.4414	22.0764
ENSMUSG00000014444	212.069	162.44	123.83	148.917	84.147	86.0158	139.663	0.53107	0.00778372	0.0459752	Piezo1	8	122481698	122551329	-	9935	protein_coding	piezo-type mechanosensitive ion channel component 1 [Source:MGI Symbol;Acc:MGI:3603204]	-	184	176	125	166	88	82	138	3.59663	2.90798	2.32325	2.64821	1.38146	1.41212	2.23435
ENSMUSG00000001521	482.917	580.539	659.767	543.637	440.816	366.092	338.025	0.530816	6.69099e-05	0.000998165	Tulp3	6	128321161	128355851	-	9342	protein_coding	tubby-like protein 3 [Source:MGI Symbol;Acc:MGI:1329045]	Tub	419	629	666	606	461	349	334	14.7211	18.68	22.2489	17.3766	13.0079	10.8027	9.72004
ENSMUSG00000030584	136.001	148.596	138.69	151.608	79.3659	80.7709	122.458	0.53031	0.00277048	0.0211734	Dpf1	7	29303951	29318243	+	5376	protein_coding	D4, zinc and double PHD fingers family 1 [Source:MGI Symbol;Acc:MGI:1352748]	-	118	161	140	169	83	77	121	5.13252	5.91936	5.79008	5.99931	2.89938	2.95067	4.35942
ENSMUSG00000024940	1207.87	910.957	1053.05	1040.62	776.447	693.371	676.05	0.530073	2.07532e-06	4.85075e-05	Ltbp3	19	5740904	5758532	+	5190	protein_coding	latent transforming growth factor beta binding protein 3 [Source:MGI Symbol;Acc:MGI:1101355]	-	1048	987	1063	1160	812	661	668	13.7278	10.9284	13.2398	12.4012	8.5423	7.62821	7.24789
ENSMUSG00000026509	535.934	494.704	550.796	569.652	370.056	390.218	338.025	0.529841	1.14986e-06	2.882e-05	Capn2	1	182467260	182517608	-	6345	protein_coding	calpain 2 [Source:MGI Symbol;Acc:MGI:88264]	-	465	536	556	635	387	372	334	15.9418	15.5328	18.1246	17.7674	10.6555	11.2359	9.48475
ENSMUSG00000018849	216.679	275.041	289.267	299.628	185.506	163.64	194.314	0.529344	0.000297239	0.00352172	Wwc1	11	35838400	35980527	-	4960	protein_coding	WW, C2 and coiled-coil domain containing 1 [Source:MGI Symbol;Acc:MGI:2388637]	-	188	298	292	334	194	156	192	6.82746	9.14783	10.0831	9.89952	5.65825	4.99123	5.77561
ENSMUSG00000032714	232.814	189.206	208.035	213.508	152.038	119.583	150.796	0.527686	0.00040739	0.0045971	Syde1	10	78584503	78591964	-	3288	protein_coding	synapse defective 1, Rho GTPase, homolog 1 (C. elegans) [Source:MGI Symbol;Acc:MGI:1918959]	-	202	205	210	238	159	114	149	4.17664	3.58286	4.1286	4.01623	2.64029	2.07664	2.55186
ENSMUSG00000027580	104.882	97.8333	125.811	153.402	65.0227	74.4771	94.1207	0.527356	0.00680666	0.0418216	Helz2	2	181227615	181242027	-	11529	protein_coding	helicase with zinc finger 2, transcriptional coactivator [Source:MGI Symbol;Acc:MGI:2385169]	-	91	106	127	171	68	71	93	0.774869	0.762945	1.02825	1.18836	0.465023	0.532631	0.655941
ENSMUSG00000027339	80.6783	79.3742	81.2326	94.1945	47.8108	53.4976	61.7351	0.526134	0.00641029	0.0400693	Rassf2	2	131989415	132030258	-	11993	protein_coding	Ras association (RalGDS/AF-6) domain family member 2 [Source:MGI Symbol;Acc:MGI:2442060]	-	70	86	82	105	50	51	61	1.30811	1.35845	1.45702	1.6014	0.750401	0.839646	0.944212
ENSMUSG00000021696	100.272	109.832	165.437	133.666	77.4535	89.1627	81.9761	0.526125	0.00537497	0.0350316	Elovl7	13	108214404	108285683	+	4013	protein_coding	ELOVL family member 7, elongation of long chain fatty acids (yeast) [Source:MGI Symbol;Acc:MGI:1921809]	-	87	119	167	149	81	85	81	1.85877	2.14909	3.39259	2.59812	1.38986	1.59995	1.43347
ENSMUSG00000029156	1052.28	1006.02	1380.95	1157.25	764.973	818.199	764.098	0.525779	6.45383e-06	0.000132465	Sgcb	5	73632749	73647790	-	4052	protein_coding	sarcoglycan, beta (dystrophin-associated glycoprotein) [Source:MGI Symbol;Acc:MGI:1346523]	-	913	1090	1394	1290	800	780	755	29.2229	29.4903	42.4252	33.6984	20.5647	21.9952	20.0168
ENSMUSG00000069171	572.816	549.158	522.068	575.035	423.604	386.022	322.844	0.525562	6.84065e-06	0.00013898	Nr2f1	13	78188973	78199757	-	5093	protein_coding	nuclear receptor subfamily 2, group F, member 1 [Source:MGI Symbol;Acc:MGI:1352451]	RXR-like	497	595	527	641	443	368	319	23.27	23.5482	23.4617	24.4943	16.658	15.1799	12.3716
ENSMUSG00000047155	108.339	94.1415	105.999	113.033	71.7162	63.9874	71.8556	0.525268	0.00305256	0.0228266	Cyp4x1	4	115106323	115134281	-	4187	protein_coding	cytochrome P450, family 4, subfamily x, polypeptide 1 [Source:MGI Symbol;Acc:MGI:1932403]	-	94	102	107	126	75	61	71	2.23836	2.05306	2.42266	2.44871	1.4343	1.27971	1.40041
ENSMUSG00000035284	3212.15	2821.47	3232.46	3274.38	1846.45	2137.81	2454.22	0.523595	7.2051e-07	1.85755e-05	Vps13c	9	67840396	67995638	+	16299	protein_coding	vacuolar protein sorting 13C [Source:MGI Symbol;Acc:MGI:2444207]	-	2787	3057	3263	3650	1931	2038	2425	42.0115	38.9517	46.7688	44.9045	23.3772	27.0655	30.2787
ENSMUSG00000040811	1053.43	1115.85	1197.69	1113.29	843.382	671.343	789.399	0.522205	3.6064e-07	9.96794e-06	Eml2	7	19176421	19206482	+	3529	protein_coding	echinoderm microtubule associated protein like 2 [Source:MGI Symbol;Acc:MGI:1919455]	-	914	1209	1209	1241	882	640	780	43.6359	48.7893	54.8822	48.3543	33.8178	26.919	30.8452
ENSMUSG00000031283	560.138	509.471	579.525	554.402	365.274	361.896	404.82	0.522032	8.76307e-07	2.2305e-05	Chrdl1	X	143285674	143394262	-	6758	protein_coding	chordin-like 1 [Source:MGI Symbol;Acc:MGI:1933172]	-	486	552	585	618	382	345	400	11.0577	10.6161	12.6558	11.4758	6.98022	6.91556	7.53844
ENSMUSG00000040270	247.798	189.206	201.1	202.742	142.476	122.73	156.868	0.520929	0.00068181	0.00702327	Bach2	4	32238804	32586108	+	9940	protein_coding	BTB and CNC homology, basic leucine zipper transcription factor 2 [Source:MGI Symbol;Acc:MGI:894679]	TF_bZIP	215	205	203	226	149	117	155	4.50851	3.6337	4.04761	3.86784	2.50934	2.16153	2.69229
ENSMUSG00000041801	124.475	212.28	187.231	142.637	131.958	106.995	86.0243	0.520906	0.00703523	0.0428462	Phlda3	1	135766119	135769136	+	1559	protein_coding	pleckstrin homology like domain, family A, member 3 [Source:MGI Symbol;Acc:MGI:1351485]	-	108	230	189	159	138	102	85	7.32763	13.1907	12.193	8.80446	7.51965	6.09707	4.77698
ENSMUSG00000031328	2288.96	2179.1	2268.57	2145.84	1625.57	1466.46	1509.98	0.520886	2.84739e-11	1.67689e-09	Flna	X	74223461	74249820	-	9400	protein_coding	filamin, alpha [Source:MGI Symbol;Acc:MGI:95556]	-	1986	2361	2290	2392	1700	1398	1492	41.646	41.8496	45.6602	40.9375	28.6301	25.8275	25.9154
ENSMUSG00000036356	179.797	137.52	167.418	133.666	100.403	117.485	89.0604	0.520268	0.00238312	0.0187374	Csgalnact1	8	68356781	68735146	-	5093	protein_coding	chondroitin sulfate N-acetylgalactosaminyltransferase 1 [Source:MGI Symbol;Acc:MGI:2442354]	-	156	149	169	149	105	112	88	7.53768	6.08555	7.7644	5.87578	4.07457	4.76774	3.52201
ENSMUSG00000026796	938.173	939.569	916.343	937.46	668.395	646.167	617.351	0.519548	1.74888e-09	7.60542e-08	Fam129b	2	32876114	32925254	+	4672	protein_coding	family with sequence similarity 129, member B [Source:MGI Symbol;Acc:MGI:2442910]	-	814	1018	925	1045	699	616	610	47.7473	50.4745	51.591	50.0272	32.9291	31.8336	29.638
ENSMUSG00000028919	399.934	442.096	354.65	446.751	303.12	272.733	265.157	0.518175	3.63154e-05	0.00059603	Arhgef19	4	141239499	141257564	+	4242	protein_coding	Rho guanine nucleotide exchange factor (GEF) 19 [Source:MGI Symbol;Acc:MGI:1925912]	-	347	479	358	498	317	260	262	21.1764	24.7092	20.7737	24.8038	15.5368	13.979	13.244
ENSMUSG00000047963	93.3563	103.371	111.942	74.4585	67.8913	63.9874	54.6507	0.51817	0.00776395	0.0458879	Stbd1	5	92603041	92606579	+	2221	protein_coding	starch binding domain 1 [Source:MGI Symbol;Acc:MGI:1261768]	-	81	112	113	83	71	61	54	3.86436	4.51659	5.126	3.23174	2.72038	2.56391	2.13394
ENSMUSG00000004633	524.409	519.624	526.03	653.082	399.698	403.855	334.989	0.51815	3.13234e-05	0.000527204	Chn2	6	54039554	54301810	+	5812	protein_coding	chimerin 2 [Source:MGI Symbol;Acc:MGI:1917243]	-	455	563	531	728	418	385	331	28.615	29.9289	31.753	37.3662	21.1124	21.3316	17.2427
ENSMUSG00000008575	845.969	651.607	688.496	643.214	432.21	423.785	582.941	0.517314	0.000172103	0.00222718	Nfib	4	82290173	82705750	-	14957	protein_coding	nuclear factor I/B [Source:MGI Symbol;Acc:MGI:103188]	CTF/NFI	734	706	695	717	452	404	576	12.1887	9.9098	10.9737	9.71728	6.02805	5.91047	7.92277
ENSMUSG00000021556	157.899	130.137	135.718	133.666	94.6654	71.3302	110.314	0.516518	0.0032913	0.0241539	Golm1	13	59634626	59675811	-	4424	protein_coding	golgi membrane protein 1 [Source:MGI Symbol;Acc:MGI:1917329]	-	137	141	137	149	99	68	109	4.22204	3.673	4.01449	3.74761	2.45028	1.84626	2.78242
ENSMUSG00000021068	2246.31	1903.13	2222.01	2377.29	1282.29	1502.13	1722.51	0.515034	6.14457e-06	0.000128115	Nin	12	70011435	70113717	-	17005	protein_coding	ninein [Source:MGI Symbol;Acc:MGI:105108]	-	1949	2062	2243	2650	1341	1432	1702	32.5555	29.114	35.6246	36.1264	17.9896	21.0735	23.5487
ENSMUSG00000068323	825.224	995.869	609.244	760.733	554.605	499.311	569.784	0.51495	0.000285384	0.00340139	Slc4a5	6	83219828	83304945	+	5804	protein_coding	solute carrier family 4, sodium bicarbonate cotransporter, member 5 [Source:MGI Symbol;Acc:MGI:2443220]	-	716	1079	615	848	580	476	563	18.8159	23.9681	15.3672	18.1875	12.241	11.0204	12.255
ENSMUSG00000059142	399.934	320.266	365.547	348.968	238.098	232.872	264.145	0.514047	4.24319e-05	0.000679194	Zfp945	17	22846697	22867134	-	10173	protein_coding	zinc finger protein 945 [Source:MGI Symbol;Acc:MGI:2445132]	zf-C2H2	347	347	369	389	249	222	261	4.6853	3.96039	4.73742	4.28671	2.70014	2.64084	2.91906
ENSMUSG00000022246	319.255	293.5	295.211	348.071	188.375	190.913	260.097	0.513255	0.000370465	0.00424962	Rai14	15	10568969	10714624	-	8462	protein_coding	retinoic acid induced 14 [Source:MGI Symbol;Acc:MGI:1922896]	-	277	318	298	388	197	182	257	6.83543	6.63305	6.99214	7.81418	3.90419	3.95675	5.25308
ENSMUSG00000068566	186.713	184.591	160.484	173.138	123.352	104.897	128.53	0.512954	0.000739483	0.00746149	Myadm	7	3289080	3300442	+	4480	protein_coding	myeloid-associated differentiation marker [Source:MGI Symbol;Acc:MGI:1355332]	-	162	200	162	193	129	100	127	4.61585	4.8169	4.38894	4.48808	2.95193	2.51026	2.99734
ENSMUSG00000055799	122.17	139.366	105.999	125.593	90.8405	75.5261	79.952	0.512316	0.00313855	0.0233429	Tcf7l1	6	72626378	72789254	-	3924	protein_coding	transcription factor 7 like 1 (T cell specific, HMG box) [Source:MGI Symbol;Acc:MGI:1202876]	HMG	106	151	107	140	95	72	79	5.44284	6.55386	5.2241	5.86697	3.91762	3.25711	3.36002
ENSMUSG00000016494	126.78	142.135	125.811	157.888	79.3659	106.995	91.0845	0.512179	0.00281493	0.0214766	Cd34	1	194938819	194961279	+	7290	protein_coding	CD34 antigen [Source:MGI Symbol;Acc:MGI:88329]	-	110	154	127	176	83	102	90	3.41006	4.03543	3.74352	4.45295	2.06645	2.7858	2.31103
ENSMUSG00000021182	686.918	635.916	686.514	730.232	445.597	476.234	498.941	0.512117	3.82865e-07	1.04698e-05	Ccdc88c	12	100911523	101029056	-	11386	protein_coding	coiled-coil domain containing 88C [Source:MGI Symbol;Acc:MGI:1915589]	-	596	689	693	814	466	454	493	15.6201	15.2636	17.2695	17.4112	9.80849	10.4827	10.7024
ENSMUSG00000003161	406.849	455.017	449.751	463.796	338.5	288.468	289.446	0.511507	1.01454e-05	0.000197227	Sri	5	8046078	8069379	+	4852	protein_coding	sorcin [Source:MGI Symbol;Acc:MGI:98419]	-	353	493	454	517	354	275	286	19.4476	22.9583	23.7824	23.246	15.663	13.3477	13.0513
ENSMUSG00000047409	291.594	219.663	231.81	251.185	170.206	174.13	161.928	0.511313	0.000328974	0.00384714	Ctdspl	9	118926453	119043998	+	5190	protein_coding	CTD (carboxy-terminal domain, RNA polymerase II, polypeptide A) small phosphatase-like [Source:MGI Symbol;Acc:MGI:1916524]	-	253	238	234	280	178	166	160	9.70106	7.71394	8.53144	8.76239	5.48148	5.60774	5.08175
ENSMUSG00000070436	272.001	279.655	282.333	277.201	210.367	179.374	181.157	0.510326	6.22198e-05	0.000939082	Serpinh1	7	99345376	99353239	-	2443	protein_coding	serine (or cysteine) peptidase inhibitor, clade H, member 1 [Source:MGI Symbol;Acc:MGI:88283]	-	236	303	285	309	220	171	179	10.6324	11.5388	12.2087	11.3617	7.96012	6.78727	6.67984
ENSMUSG00000027848	228.204	183.668	189.212	209.022	163.513	129.024	116.386	0.509992	0.00126291	0.011506	Olfml3	3	103722222	103738001	-	6161	protein_coding	olfactomedin-like 3 [Source:MGI Symbol;Acc:MGI:1914877]	-	198	199	191	233	171	123	115	4.9929	4.24171	4.57961	4.79523	3.46308	2.73259	2.40204
ENSMUSG00000038451	119.865	156.902	163.456	153.402	115.702	89.1627	93.1086	0.5099	0.00285935	0.0217364	Spsb2	6	124808661	124810619	+	1658	protein_coding	splA/ryanodine receptor domain and SOCS box containing 2 [Source:MGI Symbol;Acc:MGI:1315199]	-	104	170	165	171	121	85	92	6.53452	9.02879	9.85762	8.76884	6.10583	4.70522	4.7881
ENSMUSG00000004043	131.39	87.6808	105.999	116.622	65.9789	76.575	75.9038	0.509582	0.00607757	0.0384834	Stat5a	11	100859351	100885169	+	7133	protein_coding	signal transducer and activator of transcription 5A [Source:MGI Symbol;Acc:MGI:103036]	STAT	114	95	107	130	69	73	75	3.19332	2.24937	2.8499	2.97199	1.55226	1.80153	1.74018
ENSMUSG00000058135	245.492	294.423	268.464	323.85	205.586	189.864	185.205	0.509359	0.000217079	0.0027073	Gstm1	3	108012255	108017973	-	1473	protein_coding	glutathione S-transferase, mu 1 [Source:MGI Symbol;Acc:MGI:95860]	-	213	319	271	361	215	181	183	16.1075	20.391	19.4861	22.2803	13.0577	12.0589	11.4629
ENSMUSG00000000253	216.679	239.045	238.745	253.877	184.55	164.689	134.603	0.509351	0.000470153	0.00517236	Gmpr	13	45507444	45553800	+	2323	protein_coding	guanosine monophosphate reductase [Source:MGI Symbol;Acc:MGI:1913605]	-	188	259	241	283	193	157	133	14.7587	17.1866	17.9893	18.1318	12.1682	10.8585	8.64841
ENSMUSG00000032508	159.051	191.975	239.735	203.64	144.389	123.779	133.591	0.509271	0.001585	0.0137258	Myd88	9	119335934	119341411	-	2576	protein_coding	myeloid differentiation primary response gene 88 [Source:MGI Symbol;Acc:MGI:108005]	-	138	208	242	227	151	118	132	5.8673	7.4752	9.78323	7.87682	5.15602	4.42	4.64866
ENSMUSG00000052914	239.73	253.813	291.248	270.921	193.156	159.444	188.241	0.509071	0.000206598	0.00260175	Cyp2j6	4	96516138	96553661	-	3605	protein_coding	cytochrome P450, family 2, subfamily j, polypeptide 6 [Source:MGI Symbol;Acc:MGI:1270148]	-	208	275	294	302	202	152	186	3.92252	4.38364	5.27178	4.6481	3.05937	2.52538	2.90543
ENSMUSG00000091387	217.831	198.435	199.119	209.022	154.907	123.779	141.687	0.508706	0.000390677	0.00443908	Gcnt4	13	96924689	96950906	+	5087	protein_coding	glucosaminyl (N-acetyl) transferase 4, core 2 (beta-1,6-N-acetylglucosaminyltransferase) [Source:MGI Symbol;Acc:MGI:2684919]	-	189	215	201	233	162	118	140	2.52585	2.42876	2.55417	2.54137	1.73876	1.38934	1.54978
ENSMUSG00000028708	582.036	763.284	791.522	686.274	523.05	488.821	445.302	0.508095	3.79718e-05	0.000618706	Mknk1	4	115839198	115879250	+	4502	protein_coding	MAP kinase-interacting serine/threonine kinase 1 [Source:MGI Symbol;Acc:MGI:894316]	-	505	827	799	765	547	466	440	30.5989	42.3565	46.033	37.8305	26.6183	24.8761	22.0832
ENSMUSG00000001761	457.561	537.16	417.06	463.796	343.281	297.908	326.892	0.508081	3.12952e-05	0.000527204	Smo	6	29735503	29761365	+	5621	protein_coding	smoothened, frizzled class receptor [Source:MGI Symbol;Acc:MGI:108075]	-	397	582	421	517	359	284	323	8.59544	10.6513	8.66698	9.13554	6.24239	5.41723	5.79262
ENSMUSG00000056271	372.273	432.866	453.714	371.395	319.376	277.978	239.856	0.507511	0.000154415	0.00203713	Lman1l	9	57607085	57620774	-	1685	protein_coding	lectin, mannose-binding 1 like [Source:MGI Symbol;Acc:MGI:2667537]	-	323	469	458	414	334	265	237	13.8367	16.9826	18.6554	14.4743	11.4909	10.0013	8.40957
ENSMUSG00000025921	998.106	1144.46	1185.8	1208.38	822.346	788.828	752.966	0.507062	2.2096e-07	6.51578e-06	Rdh10	1	16105774	16133734	+	4160	protein_coding	retinol dehydrogenase 10 (all-trans) [Source:MGI Symbol;Acc:MGI:1924238]	-	866	1240	1197	1347	860	752	744	21.2312	25.6968	27.9036	26.952	16.933	16.2426	15.1086
ENSMUSG00000059714	1156	1357.67	1470.11	1141.1	1038.45	807.709	798.508	0.506316	5.18637e-05	0.00080496	Flot1	17	35823230	35832791	+	2893	protein_coding	flotillin 1 [Source:MGI Symbol;Acc:MGI:1100500]	-	1003	1471	1484	1272	1086	770	789	83.1562	103.088	116.986	86.069	72.3107	56.2426	54.1833
ENSMUSG00000029994	100.272	120.907	104.017	120.21	80.3221	75.5261	67.8074	0.505264	0.00412572	0.0284973	Anxa4	6	86736840	86793584	-	4645	protein_coding	annexin A4 [Source:MGI Symbol;Acc:MGI:88030]	-	87	131	105	134	84	72	67	4.07343	5.18457	4.67453	5.12049	3.15863	2.96999	2.59843
ENSMUSG00000036617	408.002	413.484	316.015	396.514	232.36	280.076	277.302	0.505079	0.000170474	0.00221973	Etl4	2	19909780	20810713	+	16067	protein_coding	enhancer trap locus 4 [Source:MGI Symbol;Acc:MGI:95454]	-	354	448	319	442	243	267	274	7.31279	7.82272	6.26582	7.45191	4.03148	4.85928	4.6884
ENSMUSG00000026544	97.9665	115.369	102.036	88.812	81.2783	62.9384	55.6628	0.50495	0.00787804	0.0462594	Dusp23	1	172630764	172632962	-	1410	protein_coding	dual specificity phosphatase 23 [Source:MGI Symbol;Acc:MGI:1915690]	-	85	125	103	99	85	60	55	4.09833	5.09447	4.72208	3.89574	3.29144	2.54871	2.19657
ENSMUSG00000038146	253.56	179.053	217.941	235.038	151.082	138.464	160.916	0.504718	0.000989116	0.00942117	Notch3	17	32120820	32166880	-	8044	protein_coding	notch 3 [Source:MGI Symbol;Acc:MGI:99460]	-	220	194	220	262	158	132	159	1.85934	1.38592	1.76793	1.80719	1.07244	0.982857	1.11308
ENSMUSG00000047875	150.984	148.596	136.708	125.593	77.4535	101.75	104.241	0.504665	0.00283364	0.021592	Gpr157	4	150087365	150105927	+	4900	protein_coding	G protein-coupled receptor 157 [Source:MGI Symbol;Acc:MGI:2442046]	-	131	161	138	140	81	97	103	1.81753	1.88816	1.82053	1.58528	0.902558	1.18567	1.18371
ENSMUSG00000047045	397.629	432.866	451.732	501.474	315.551	311.545	298.555	0.504457	1.85174e-05	0.000331711	Tmem164	X	142681406	142843494	+	6851	protein_coding	transmembrane protein 164 [Source:MGI Symbol;Acc:MGI:2148020]	-	345	469	456	559	330	297	295	7.88652	9.06233	9.9115	10.429	6.05842	5.98142	5.58577
ENSMUSG00000022687	176.34	155.979	130.765	166.859	116.658	100.701	101.205	0.504282	0.00200949	0.0164231	Boc	16	44485049	44558897	-	4451	protein_coding	biregional cell adhesion molecule-related/down-regulated by oncogenes (Cdon) binding protein [Source:MGI Symbol;Acc:MGI:2151153]	-	153	169	132	186	122	96	100	2.33691	2.18191	1.91704	2.31862	1.49654	1.29182	1.26516
ENSMUSG00000097156	250.103	252.89	335.827	255.671	162.557	172.032	222.651	0.503869	0.00127766	0.0115993	Gm3764	3	88206813	88229959	+	5813	lincRNA	predicted gene 3764 [Source:MGI Symbol;Acc:MGI:3781938]	-	217	274	339	285	170	164	220	16.5759	17.6917	24.6221	17.7676	10.4291	11.0368	13.9199
ENSMUSG00000026727	142.916	130.137	121.849	130.975	116.658	71.3302	72.8676	0.503681	0.00683699	0.0419507	Rsu1	2	13076821	13271415	-	9299	protein_coding	Ras suppressor protein 1 [Source:MGI Symbol;Acc:MGI:103040]	-	124	141	123	146	122	68	72	5.59021	5.37311	5.27253	5.37186	4.41718	2.70082	2.68865
ENSMUSG00000051557	121.017	119.061	148.596	124.696	105.184	88.1137	61.7351	0.503661	0.00702456	0.0428102	Pusl1	4	155887879	155891781	-	2329	protein_coding	pseudouridylate synthase-like 1 [Source:MGI Symbol;Acc:MGI:3047787]	-	105	129	150	139	110	84	61	9.84597	10.2249	13.3742	10.6378	8.28402	6.93953	4.73799
ENSMUSG00000022483	1431.46	1572.72	1598.89	1288.22	1083.39	1056.32	932.098	0.502607	1.42872e-06	3.48875e-05	Col2a1	15	97975602	98004695	-	9243	protein_coding	collagen, type II, alpha 1 [Source:MGI Symbol;Acc:MGI:88452]	-	1242	1704	1614	1436	1133	1007	921	46.6241	54.0703	57.6103	43.9956	34.1584	33.3042	28.6381
ENSMUSG00000024781	372.273	332.264	317.005	364.219	218.973	231.823	266.169	0.501827	7.69009e-05	0.00112395	Lipa	19	34492318	34527474	-	2969	protein_coding	lysosomal acid lipase A [Source:MGI Symbol;Acc:MGI:96789]	-	323	360	320	406	229	221	263	7.40103	6.97257	6.97185	7.59245	4.21409	4.46132	4.99161
ENSMUSG00000038388	772.206	509.471	598.347	610.919	385.355	389.169	502.989	0.501109	0.00054588	0.00584858	Mpp6	6	50110241	50198939	+	6254	protein_coding	membrane protein, palmitoylated 6 (MAGUK p55 subfamily member 6) [Source:MGI Symbol;Acc:MGI:1927340]	-	670	552	604	681	403	371	497	26.2835	18.3041	22.5296	21.8033	12.6968	12.8222	16.1495
ENSMUSG00000020653	206.306	159.671	184.259	200.948	131.002	147.905	102.217	0.501006	0.00221366	0.0177378	Klf11	12	24651274	24662789	+	4340	protein_coding	Kruppel-like factor 11 [Source:MGI Symbol;Acc:MGI:2653368]	zf-C2H2	179	173	186	224	137	141	101	8.38674	6.85151	8.2863	8.56553	5.15513	5.82023	3.91973
ENSMUSG00000031925	343.459	240.891	250.632	255.671	192.199	191.962	173.061	0.500461	0.000861062	0.00841496	Maml2	9	13297957	13709388	+	6598	protein_coding	mastermind like transcriptional coactivator 2 [Source:MGI Symbol;Acc:MGI:2389460]	-	298	261	253	285	201	183	171	5.6464	4.18019	4.5581	4.40723	3.05865	3.05483	2.68377
ENSMUSG00000024299	360.747	419.945	523.059	365.116	350.931	276.929	219.615	0.500065	0.00228031	0.0180983	Adamts10	17	33524204	33553782	+	5453	protein_coding	a disintegrin-like and metallopeptidase (reprolysin type) with thrombospondin type 1 motif, 10 [Source:MGI Symbol;Acc:MGI:2449112]	-	313	455	528	407	367	264	217	6.87529	8.44809	11.0278	7.29638	6.47428	5.10895	3.94822
ENSMUSG00000052387	3733.1	3178.66	3093.77	3554.27	2369.5	2271.03	2476.49	0.498663	4.13774e-08	1.42031e-06	Trpm3	19	22139119	22989884	+	8061	protein_coding	transient receptor potential cation channel, subfamily M, member 3 [Source:MGI Symbol;Acc:MGI:2443101]	-	3239	3444	3123	3962	2478	2165	2447	43.2614	38.8824	39.6615	43.1887	26.5809	25.4758	27.0719
ENSMUSG00000039934	197.086	225.201	232.801	213.508	131.958	150.003	165.976	0.497851	0.000548491	0.00587306	Gsap	5	21186255	21315132	+	10425	protein_coding	gamma-secretase activating protein [Source:MGI Symbol;Acc:MGI:2442259]	-	171	244	235	238	138	143	164	5.03259	6.06996	6.57614	5.71661	3.26177	3.70777	3.99792
ENSMUSG00000022178	155.594	168.901	201.1	184.801	130.045	122.73	111.326	0.497075	0.00132387	0.011899	Ajuba	14	54567472	54577558	-	3646	protein_coding	ajuba LIM protein [Source:MGI Symbol;Acc:MGI:1341886]	-	135	183	203	206	136	117	110	3.27196	3.74909	4.6782	4.07481	2.64723	2.49828	2.20832
ENSMUSG00000062210	213.221	188.283	139.68	206.331	109.965	119.583	148.771	0.495899	0.00425348	0.0291785	Tnfaip8	18	49979427	50107173	+	10328	protein_coding	tumor necrosis factor, alpha-induced protein 8 [Source:MGI Symbol;Acc:MGI:2147191]	-	185	204	141	230	115	114	147	10.0536	9.37089	7.2858	10.201	5.01911	5.45803	6.61702
ENSMUSG00000051910	624.68	457.786	442.817	512.239	306.945	322.035	420.001	0.495055	0.0007339	0.00742595	Sox6	7	115470872	116038796	-	14832	protein_coding	SRY (sex determining region Y)-box 6 [Source:MGI Symbol;Acc:MGI:98368]	HMG	542	496	447	571	321	307	415	10.2354	7.91748	8.02639	8.80049	4.86843	5.10769	6.49154
ENSMUSG00000001313	1030.38	973.718	1081.78	1153.66	812.783	748.967	661.881	0.494456	2.2113e-06	5.09292e-05	Rnd2	11	101464999	101471853	+	1990	protein_coding	Rho family GTPase 2 [Source:MGI Symbol;Acc:MGI:1338755]	-	894	1055	1092	1286	850	714	654	47.9698	47.8502	55.7136	56.3168	36.6293	33.7528	29.0672
ENSMUSG00000036111	570.511	790.973	756.85	627.963	548.868	488.821	380.531	0.494291	0.000599319	0.0063086	Lmo1	7	109138572	109175207	-	1552	protein_coding	LIM domain only 1 [Source:MGI Symbol;Acc:MGI:102812]	-	495	857	764	700	574	466	376	34.0609	49.8462	49.9864	39.311	31.7206	28.2499	21.4305
ENSMUSG00000025418	94.5088	107.063	87.1764	120.21	75.5411	59.7915	69.8315	0.493776	0.00830802	0.0481718	Bsnd	4	106483456	106492283	-	2756	protein_coding	barttin CLCNK type accessory beta subunit [Source:MGI Symbol;Acc:MGI:2153465]	-	82	116	88	134	79	57	69	2.02275	2.41873	2.06404	2.69773	1.56507	1.23875	1.40985
ENSMUSG00000027087	1451.06	1035.56	1261.09	1211.07	833.82	820.297	936.147	0.493361	2.52595e-05	0.000438538	Itgav	2	83724397	83806916	+	10744	protein_coding	integrin alpha V [Source:MGI Symbol;Acc:MGI:96608]	-	1259	1122	1273	1350	872	782	925	35.5892	26.8093	34.216	31.1453	19.7965	19.4751	21.6585
ENSMUSG00000040624	336.544	254.736	266.482	307.702	167.338	195.109	236.82	0.493344	0.00115921	0.0107681	Plekhg1	10	3740364	3967303	+	8739	protein_coding	pleckstrin homology domain containing, family G (with RhoGef domain) member 1 [Source:MGI Symbol;Acc:MGI:2676551]	-	292	276	269	343	175	186	234	5.43724	4.34415	4.76273	5.21262	2.61705	3.05133	3.60916
ENSMUSG00000092981	208.611	174.439	188.222	142.637	135.783	113.289	114.362	0.492036	0.00287499	0.0217965	Mir5125	17	23823291	23823369	+	79	miRNA	microRNA 5125 [Source:MGI Symbol;Acc:MGI:4950450]	-	181	189	190	159	142	108	113	155.761	137.481	155.468	111.672	98.1403	81.8814	80.5478
ENSMUSG00000055541	104.882	130.137	150.577	118.416	88.9281	78.673	88.0484	0.491838	0.00519735	0.034208	Lair1	7	4003402	4063204	-	7475	protein_coding	leukocyte-associated Ig-like receptor 1 [Source:MGI Symbol;Acc:MGI:105492]	-	91	141	152	132	93	75	87	3.18075	4.16589	5.05172	3.76554	2.61066	2.30957	2.51885
ENSMUSG00000021754	2745.37	1833.91	2178.42	2580.93	1361.65	1527.3	1946.17	0.491664	0.000537211	0.00576941	Map3k1	13	111746428	111808993	-	7447	protein_coding	mitogen-activated protein kinase kinase kinase 1 [Source:MGI Symbol;Acc:MGI:1346872]	-	2382	1987	2199	2877	1424	1456	1923	87.7714	61.8884	77.045	86.5201	42.1405	47.2665	58.6929
ENSMUSG00000011148	546.307	607.305	672.645	537.357	512.532	386.022	321.832	0.491661	0.000802237	0.00797854	Adssl1	12	112620045	112641360	+	2090	protein_coding	adenylosuccinate synthetase like 1 [Source:MGI Symbol;Acc:MGI:87947]	-	474	658	679	599	536	368	318	27.6368	32.4291	37.6432	28.5037	25.0988	18.9033	15.3579
ENSMUSG00000033965	417.222	290.731	310.071	420.735	231.404	218.186	288.434	0.491247	0.00192182	0.0158504	Slc16a2	X	103697414	103821983	-	4263	protein_coding	solute carrier family 16 (monocarboxylic acid transporters), member 2 [Source:MGI Symbol;Acc:MGI:1203732]	-	362	315	313	469	242	208	285	13.7718	10.1296	11.3223	14.562	7.39396	6.97152	8.98096
ENSMUSG00000056073	628.138	496.55	542.871	535.563	361.45	396.512	396.724	0.489628	1.94057e-05	0.000345563	Grik2	10	49094833	49788766	-	13246	protein_coding	glutamate receptor, ionotropic, kainate 2 (beta 2) [Source:MGI Symbol;Acc:MGI:95815]	-	545	538	548	597	378	378	392	12.4167	10.3608	11.8713	11.1007	6.91639	7.5872	7.39758
ENSMUSG00000025314	671.935	559.311	518.105	624.375	400.654	357.7	478.7	0.489427	0.000171352	0.00222154	Ptprj	2	90429754	90580647	-	8352	protein_coding	protein tyrosine phosphatase, receptor type, J [Source:MGI Symbol;Acc:MGI:104574]	-	583	606	523	696	419	341	473	8.14357	7.15516	6.94633	7.93453	4.70045	4.19645	5.47271
ENSMUSG00000037447	195.933	182.745	266.482	194.669	115.702	127.975	182.169	0.489005	0.0061528	0.0387962	Arid5a	1	36307733	36324029	+	12540	protein_coding	AT rich interactive domain 5A (MRF1-like) [Source:MGI Symbol;Acc:MGI:2443039]	ARID	170	198	269	217	121	122	180	5.1343	5.05473	7.72489	5.34882	2.93492	3.24618	4.50297
ENSMUSG00000032796	284.679	168.901	223.885	262.848	137.695	167.836	173.061	0.488652	0.0046404	0.0313516	Lama1	17	67697259	67822647	+	9681	protein_coding	laminin, alpha 1 [Source:MGI Symbol;Acc:MGI:99892]	-	247	183	226	293	144	160	171	4.00097	2.50565	3.48085	3.87349	1.87331	2.28333	2.29435
ENSMUSG00000032735	366.51	307.344	331.865	420.735	231.404	204.55	300.579	0.487688	0.00142829	0.0126545	Ablim3	18	61799395	61911852	-	4560	protein_coding	actin binding LIM protein family, member 3 [Source:MGI Symbol;Acc:MGI:2442582]	-	318	333	335	469	242	195	297	4.94486	4.37695	4.95313	5.95204	3.02219	2.67143	3.82542
ENSMUSG00000066842	124.475	110.755	105.008	128.284	81.2783	82.8689	74.8917	0.48703	0.00459144	0.0311013	Hmcn1	1	150562524	150993435	-	21191	protein_coding	hemicentin 1 [Source:MGI Symbol;Acc:MGI:2685047]	-	108	120	106	143	85	79	74	1.11976	1.05168	1.045	1.21005	0.707783	0.721623	0.63552
ENSMUSG00000052957	470.239	615.611	530.984	563.373	409.26	375.532	360.29	0.48692	4.56875e-05	0.000722857	Gas1	13	60174405	60177365	-	2961	protein_coding	growth arrest specific 1 [Source:MGI Symbol;Acc:MGI:95655]	-	408	667	536	628	428	358	356	13.4779	18.6247	16.8358	16.9312	11.3549	10.419	9.74108
ENSMUSG00000010660	200.543	239.045	239.735	216.199	171.163	167.836	124.482	0.486225	0.00137918	0.012298	Plcd1	9	119071527	119093502	-	3093	protein_coding	phospholipase C, delta 1 [Source:MGI Symbol;Acc:MGI:97614]	-	174	259	242	241	179	160	123	5.40641	6.80237	7.14963	6.11143	4.46675	4.37987	3.16563
ENSMUSG00000023348	262.781	271.349	291.248	270.024	186.462	210.844	176.097	0.485867	0.000176361	0.00227176	Trip6	5	137309654	137314404	-	2429	protein_coding	thyroid hormone receptor interactor 6 [Source:MGI Symbol;Acc:MGI:1343458]	-	228	294	294	301	195	201	174	16.6492	18.147	20.4133	17.9387	11.4359	12.9311	10.5245
ENSMUSG00000031209	285.832	254.736	198.128	211.713	149.17	161.542	179.133	0.485677	0.00191501	0.0158111	Heph	X	96455359	96574485	+	7662	protein_coding	hephaestin [Source:MGI Symbol;Acc:MGI:1332240]	-	248	276	200	236	156	154	177	4.55677	4.28662	3.49417	3.53903	2.30202	2.49292	2.69385
ENSMUSG00000006800	1403.8	1208.15	1539.46	1287.32	960.997	916.802	994.846	0.485089	2.20234e-06	5.08174e-05	Sulf2	2	166073089	166155663	-	5871	protein_coding	sulfatase 2 [Source:MGI Symbol;Acc:MGI:1919293]	-	1218	1309	1554	1435	1005	874	983	39.4496	35.8373	47.8579	37.9326	26.1421	24.9395	26.372
ENSMUSG00000040084	833.291	870.347	1147.16	915.929	614.847	709.106	654.797	0.484787	6.89222e-05	0.00102479	Bub1b	2	118598211	118641591	+	4275	protein_coding	BUB1B, mitotic checkpoint serine/threonine kinase [Source:MGI Symbol;Acc:MGI:1333889]	-	723	943	1158	1021	643	676	647	37.1804	40.991	56.6229	42.8517	26.5562	30.627	27.5597
ENSMUSG00000056724	283.527	275.041	325.921	296.937	203.674	223.431	192.29	0.483629	0.000178213	0.00229234	Nbeal2	9	110624789	110654161	-	9554	protein_coding	neurobeachin-like 2 [Source:MGI Symbol;Acc:MGI:2448554]	-	246	298	329	331	213	213	190	4.61609	4.72668	5.87006	5.06913	3.20995	3.52127	2.95316
ENSMUSG00000023411	124.475	88.6037	109.961	107.651	69.8038	78.673	69.8315	0.483458	0.00779303	0.0459876	Nfatc4	14	55823144	55833943	+	5808	protein_coding	nuclear factor of activated T cells, cytoplasmic, calcineurin dependent 4 [Source:MGI Symbol;Acc:MGI:1920431]	RHD	108	96	111	120	73	75	69	3.98604	2.99495	3.89537	3.61464	2.16381	2.43871	2.10941
ENSMUSG00000060988	1791.06	1321.67	1546.39	1652.44	1021.24	1077.3	1228.63	0.482472	2.66026e-05	0.000458761	Galnt13	2	54436317	55118309	+	7810	protein_coding	polypeptide N-acetylgalactosaminyltransferase 13 [Source:MGI Symbol;Acc:MGI:2139447]	-	1554	1432	1561	1842	1068	1027	1214	21.0495	16.3958	20.1049	20.3632	11.6182	12.2558	13.6208
ENSMUSG00000012017	248.95	201.204	238.745	208.125	170.206	163.64	131.567	0.481204	0.00130234	0.0117631	Scarf2	16	17797282	17808293	+	3839	protein_coding	scavenger receptor class F, member 2 [Source:MGI Symbol;Acc:MGI:1858430]	-	216	218	241	232	178	156	130	5.50602	4.69723	5.8413	4.82657	3.64404	3.5034	2.74488
ENSMUSG00000039735	520.951	427.328	539.899	453.928	299.296	346.161	374.459	0.481027	0.000158762	0.00208531	Fnbp1l	3	122538719	122619715	-	12376	protein_coding	formin binding protein 1-like [Source:MGI Symbol;Acc:MGI:1925642]	-	452	463	545	506	313	330	370	8.5145	7.37228	9.76169	7.77924	4.73526	5.47666	5.77321
ENSMUSG00000040511	391.866	360.876	319.977	387.543	229.492	279.027	259.085	0.480694	0.000169117	0.00220365	Pvr	7	19903578	19921160	-	6122	protein_coding	poliovirus receptor [Source:MGI Symbol;Acc:MGI:107741]	-	340	391	323	432	240	266	256	14.648	14.2389	13.2316	15.1897	8.30406	10.0963	9.13556
ENSMUSG00000038387	168.272	198.435	270.445	179.418	160.644	142.66	113.35	0.480694	0.00715255	0.0433555	Rras	7	45017961	45021647	+	1121	protein_coding	related RAS viral (r-ras) oncogene [Source:MGI Symbol;Acc:MGI:98179]	-	146	215	273	200	168	136	112	16.5704	20.6262	29.4612	18.5258	15.3133	13.5988	10.5292
ENSMUSG00000032232	629.291	617.457	441.826	578.623	343.281	366.092	472.628	0.480287	0.000966076	0.00926539	Cgnl1	9	71626509	71771602	-	7844	protein_coding	cingulin-like 1 [Source:MGI Symbol;Acc:MGI:1915428]	-	546	669	446	645	359	349	467	11.1839	11.5832	8.68646	10.7827	5.90573	6.29806	7.92341
ENSMUSG00000038305	117.56	147.673	157.512	116.622	91.7967	88.1137	97.1568	0.478774	0.00559236	0.0361867	Spats2l	1	57774162	57948394	+	8041	protein_coding	spermatogenesis associated, serine-rich 2-like [Source:MGI Symbol;Acc:MGI:1914448]	-	102	160	159	130	96	84	96	4.77574	6.3323	7.07857	4.96764	3.60986	3.46498	3.72312
ENSMUSG00000032816	470.239	422.714	560.703	441.369	360.493	330.427	305.639	0.478349	0.000188145	0.00240636	Igdcc4	9	65101486	65137940	+	9481	protein_coding	immunoglobulin superfamily, DCC subclass, member 4 [Source:MGI Symbol;Acc:MGI:1858497]	-	408	458	566	492	377	315	302	7.08313	6.72095	9.34306	6.97101	5.25636	4.81788	4.34277
ENSMUSG00000021665	401.086	423.637	467.583	494.297	324.157	290.566	329.928	0.477362	6.57482e-05	0.000986551	Hexb	13	97176331	97198357	-	1906	protein_coding	hexosaminidase B [Source:MGI Symbol;Acc:MGI:96074]	-	348	459	472	551	339	277	326	17.9776	20.0431	23.1847	23.2311	14.0647	12.607	13.9497
ENSMUSG00000036298	1245.9	926.647	1105.56	1126.75	734.374	731.134	864.291	0.477015	3.95029e-05	0.000639033	Slc2a13	15	91267696	91573261	-	8367	protein_coding	solute carrier family 2 (facilitated glucose transporter), member 13 [Source:MGI Symbol;Acc:MGI:2146030]	-	1081	1004	1116	1256	768	697	854	24.2384	19.0288	23.7931	22.9844	13.8299	13.7687	15.861
ENSMUSG00000033208	179.797	285.193	239.735	223.376	185.506	140.562	153.832	0.47668	0.0041084	0.0284322	S100b	10	76253853	76261159	+	1484	protein_coding	S100 protein, beta polypeptide, neural [Source:MGI Symbol;Acc:MGI:98217]	-	156	309	242	249	194	134	152	7.14658	11.9655	10.5414	9.30977	7.13763	5.40828	5.76782
ENSMUSG00000021585	336.544	317.497	363.565	310.393	239.054	219.235	243.904	0.473448	0.000115686	0.00158901	Cast	13	74692368	74808810	-	11470	protein_coding	calpastatin [Source:MGI Symbol;Acc:MGI:1098236]	-	292	344	367	346	250	209	241	8.71438	8.67786	10.4142	8.42744	5.99201	5.49517	5.95752
ENSMUSG00000031714	607.392	508.548	496.311	513.136	363.362	373.434	392.676	0.471275	2.93522e-05	0.000499014	Gab1	8	80764438	80880519	-	5082	protein_coding	growth factor receptor bound protein 2-associated protein 1 [Source:MGI Symbol;Acc:MGI:108088]	-	527	551	501	572	380	356	388	10.4362	9.22329	9.43364	9.24476	6.04361	6.21105	6.36444
ENSMUSG00000036402	289.289	270.426	256.576	296.937	198.893	187.766	202.41	0.470918	0.000217842	0.00271352	Gng12	6	66896397	67021350	+	4727	protein_coding	guanine nucleotide binding protein (G protein), gamma 12 [Source:MGI Symbol;Acc:MGI:1336171]	-	251	293	259	331	208	179	200	12.4828	12.3171	12.2475	13.4349	8.30771	7.84283	8.2388
ENSMUSG00000025555	837.902	645.146	758.831	774.189	507.751	493.017	601.158	0.46996	7.28282e-05	0.00107577	Farp1	14	121035200	121283744	+	5524	protein_coding	FERM, RhoGEF (Arhgef) and pleckstrin domain protein 1 (chondrocyte-derived) [Source:MGI Symbol;Acc:MGI:2446173]	-	727	699	766	863	531	470	594	26.6439	21.6542	26.6932	25.8131	15.6292	15.1755	18.032
ENSMUSG00000038260	111.797	110.755	142.652	113.93	80.3221	91.2607	75.9038	0.46932	0.00745857	0.044635	Trpm4	7	45302632	45333780	-	10826	protein_coding	transient receptor potential cation channel, subfamily M, member 4 [Source:MGI Symbol;Acc:MGI:1915917]	-	97	120	144	127	84	87	75	2.75919	2.8853	3.89475	2.94835	1.91897	2.18027	1.76712
ENSMUSG00000020027	263.933	191.975	254.595	248.494	181.681	180.423	138.651	0.469047	0.00266224	0.0204676	Socs2	10	95385362	95417180	-	9531	protein_coding	suppressor of cytokine signaling 2 [Source:MGI Symbol;Acc:MGI:1201787]	-	229	208	257	277	190	172	137	10.9714	8.42343	11.7076	10.8311	7.31068	7.25997	5.43676
ENSMUSG00000020120	298.51	263.965	317.005	296.937	209.411	198.256	215.567	0.469032	0.000221661	0.00275486	Plek	11	16971206	17052381	-	4486	protein_coding	pleckstrin [Source:MGI Symbol;Acc:MGI:1860485]	-	259	286	320	331	219	189	213	6.32694	5.90556	7.43279	6.59915	4.29652	4.06759	4.30992
ENSMUSG00000021127	246.645	212.28	219.922	200.051	153.951	164.689	143.711	0.468881	0.000921831	0.00890741	Zfp36l1	12	80107754	80113013	-	2990	protein_coding	zinc finger protein 36, C3H type-like 1 [Source:MGI Symbol;Acc:MGI:107946]	-	214	230	222	223	161	157	142	10.1032	9.17853	9.96565	8.59243	6.10449	6.53019	5.55301
ENSMUSG00000068876	480.612	517.778	479.47	456.619	340.413	346.161	347.133	0.468459	9.09995e-06	0.000179029	Cgn	3	94760069	94786492	-	6021	protein_coding	cingulin [Source:MGI Symbol;Acc:MGI:1927237]	-	417	561	484	509	356	330	343	7.79471	8.86395	8.60236	7.76512	5.34433	5.43449	5.31072
ENSMUSG00000031486	1206.72	1015.25	1053.05	1263.1	783.141	822.395	822.797	0.467258	6.07744e-06	0.000126908	Adgra2	8	27085583	27123436	+	5775	protein_coding	adhesion G protein-coupled receptor A2 [Source:MGI Symbol;Acc:MGI:1925810]	-	1047	1100	1063	1408	819	784	813	21.8879	19.4379	21.1299	24.0229	13.7505	14.4396	14.078
ENSMUSG00000044726	215.526	158.748	167.418	224.273	119.527	126.926	151.808	0.466831	0.00528569	0.034603	Erich5	15	34453305	34473892	+	2383	protein_coding	glutamate rich 5 [Source:MGI Symbol;Acc:MGI:2447772]	-	187	172	169	250	125	121	150	5.33488	4.14775	4.58435	5.82089	2.864	3.04123	3.54462
ENSMUSG00000037493	200.543	287.962	273.417	270.024	211.324	177.276	151.808	0.46639	0.00334607	0.0243655	Cib2	9	54544794	54560218	-	1433	protein_coding	calcium and integrin binding family member 2 [Source:MGI Symbol;Acc:MGI:1929293]	-	174	312	276	301	221	169	150	8.25487	12.5117	12.4503	11.6545	8.42039	7.06365	5.89451
ENSMUSG00000029838	1543.26	1698.24	1585.03	1576.19	1248.82	1130.79	1061.64	0.466297	1.70899e-07	5.21996e-06	Ptn	6	36714929	36810220	-	3433	protein_coding	pleiotrophin [Source:MGI Symbol;Acc:MGI:97804]	-	1339	1840	1600	1757	1306	1078	1049	43.6389	50.6887	49.5817	46.7338	34.1834	30.9523	28.3181
ENSMUSG00000032641	246.645	239.968	239.735	252.082	210.367	158.395	145.735	0.465796	0.00161528	0.0138879	Gpr19	6	134869093	134898578	-	2920	protein_coding	G protein-coupled receptor 19 [Source:MGI Symbol;Acc:MGI:892973]	-	214	260	242	281	220	151	144	13.4959	13.86	14.5115	14.4631	11.1427	8.38971	7.52222
ENSMUSG00000071711	165.967	191.975	197.138	217.993	151.082	139.513	115.374	0.465232	0.00286648	0.0217655	Mpst	15	78406416	78414013	+	2143	protein_coding	mercaptopyruvate sulfurtransferase [Source:MGI Symbol;Acc:MGI:2179733]	-	144	208	199	243	158	133	114	8.67882	10.5965	11.4041	11.9528	7.64776	7.06205	5.69112
ENSMUSG00000052560	237.425	251.967	276.389	242.214	193.156	184.619	155.856	0.465176	0.00069826	0.00714962	Cpne8	15	90487482	90679432	-	4164	protein_coding	copine VIII [Source:MGI Symbol;Acc:MGI:1914121]	-	206	273	279	270	202	176	154	8.26725	9.26098	10.6465	8.84349	6.51065	6.22283	5.11929
ENSMUSG00000041272	590.104	515.932	509.19	610.022	386.311	382.875	420.001	0.464921	3.61068e-05	0.000593146	Tox	4	6686353	6991557	-	7609	protein_coding	thymocyte selection-associated high mobility group box [Source:MGI Symbol;Acc:MGI:2181659]	HMG	512	559	514	680	404	365	415	14.9647	13.8105	14.2846	16.2208	9.48327	9.39878	10.0471
ENSMUSG00000051379	367.662	315.651	317.005	288.863	240.966	197.207	243.904	0.464309	0.000586495	0.00620035	Flrt3	2	140650914	140671469	-	4865	protein_coding	fibronectin leucine rich transmembrane protein 3 [Source:MGI Symbol;Acc:MGI:1918686]	-	319	342	320	322	252	188	241	8.08309	7.3251	7.70983	6.65899	5.12821	4.19687	5.05823
ENSMUSG00000040183	1021.16	799.279	932.193	1003.84	624.409	645.118	738.797	0.463813	4.33001e-05	0.000689321	Ankrd6	4	32804035	32950841	-	5477	protein_coding	ankyrin repeat domain 6 [Source:MGI Symbol;Acc:MGI:2154278]	-	886	866	941	1119	653	615	730	21.4203	17.6974	21.6316	22.0794	12.679	13.0993	14.6187
ENSMUSG00000034168	1786.45	1565.33	1747.49	1756.5	1198.14	1235.69	1262.03	0.463537	3.40152e-08	1.19491e-06	Irf2bpl	12	86880701	86884798	-	4098	protein_coding	interferon regulatory factor 2 binding protein-like [Source:MGI Symbol;Acc:MGI:2442463]	-	1550	1696	1764	1958	1253	1178	1247	25.7139	23.7827	27.8254	26.5103	16.6942	17.2172	17.1355
ENSMUSG00000092060	743.393	533.468	625.095	694.348	337.544	483.577	544.483	0.463247	0.00254274	0.0197249	Bend4	5	67392147	67428310	-	9886	protein_coding	BEN domain containing 4 [Source:MGI Symbol;Acc:MGI:3648414]	-	645	578	631	774	353	461	538	5.49427	4.16177	5.11078	5.38093	2.41493	3.45965	3.79601
ENSMUSG00000045876	213.221	158.748	175.343	179.418	104.228	121.681	152.82	0.463182	0.00557825	0.0361083	Pcdhb8	18	37355121	37358604	+	3484	protein_coding	protocadherin beta 8 [Source:MGI Symbol;Acc:MGI:2136742]	-	185	172	177	200	109	116	151	6.62648	5.20763	6.02827	5.84665	3.13557	3.66058	4.48005
ENSMUSG00000087143	148.679	145.827	128.783	162.373	106.14	93.3586	107.277	0.462875	0.00404299	0.0280594	A830082K12Rik	13	78198017	78279391	+	8255	antisense	RIKEN cDNA A830082K12 gene [Source:MGI Symbol;Acc:MGI:2443527]	-	129	158	130	181	111	89	106	5.98223	6.19343	5.73224	6.85043	4.13405	3.63617	4.07169
ENSMUSG00000042129	892.071	787.281	889.596	869.281	547.912	662.951	635.568	0.462544	7.61111e-06	0.000152569	Rassf4	6	116633008	116673952	-	9209	protein_coding	Ras association (RalGDS/AF-6) domain family member 4 [Source:MGI Symbol;Acc:MGI:2386853]	-	774	853	898	969	573	632	628	30.4512	28.367	33.5929	31.1138	18.1049	21.9059	20.4653
ENSMUSG00000026821	764.139	695.908	807.373	778.675	589.029	504.556	541.447	0.462498	6.38732e-06	0.000131851	Ralgds	2	28513125	28553081	+	6159	protein_coding	ral guanine nucleotide dissociation stimulator [Source:MGI Symbol;Acc:MGI:107485]	-	663	754	815	868	616	481	535	23.861	22.9376	27.8895	25.4954	17.8047	15.2511	15.9487
ENSMUSG00000030662	3477.23	2637.81	3205.71	3066.26	2193.56	2179.77	2284.2	0.462399	3.16819e-06	7.08361e-05	Ipo5	14	120911224	120947999	+	6001	protein_coding	importin 5 [Source:MGI Symbol;Acc:MGI:1917822]	-	3017	2858	3236	3418	2294	2078	2257	57.2288	45.825	58.3655	52.9148	34.9471	34.7269	35.4622
ENSMUSG00000029913	146.373	173.516	154.54	142.637	123.352	97.5545	102.217	0.462255	0.00417574	0.0287877	Prdm5	6	65778988	65937010	+	9295	protein_coding	PR domain containing 5 [Source:MGI Symbol;Acc:MGI:1918029]	zf-C2H2	127	188	156	159	129	93	101	4.20759	5.26488	4.91431	4.29926	3.43241	2.71453	2.7717
ENSMUSG00000033161	7379.76	5992.75	6221.23	6817.89	4691.19	4396.25	5138.18	0.460971	1.43553e-06	3.50062e-05	Atp1a1	3	101576219	101604684	-	4568	protein_coding	ATPase, Na+/K+ transporting, alpha 1 polypeptide [Source:MGI Symbol;Acc:MGI:88105]	-	6403	6493	6280	7600	4906	4191	5077	246.91	211.642	230.262	239.185	151.936	142.382	162.165
ENSMUSG00000001768	647.731	653.452	568.628	702.422	432.21	411.197	532.339	0.460286	0.000148795	0.0019702	Rin2	2	145675215	145887616	+	11271	protein_coding	Ras and Rab interactor 2 [Source:MGI Symbol;Acc:MGI:1921280]	-	562	708	574	783	452	392	526	18.6285	19.837	18.091	21.1821	12.0326	11.4475	14.4418
ENSMUSG00000045991	273.154	197.512	242.707	267.333	151.082	164.689	200.386	0.460017	0.00313251	0.0233076	Onecut2	18	64340364	64398488	+	13391	protein_coding	one cut domain, family member 2 [Source:MGI Symbol;Acc:MGI:1891408]	CUT	237	214	245	298	158	157	198	1.2033	0.918419	1.18277	1.23484	0.644262	0.702276	0.832697
ENSMUSG00000043496	382.646	322.111	319.977	350.762	235.229	246.509	253.013	0.459929	0.000173535	0.00224017	Tril	6	53815468	53820830	-	5363	protein_coding	TLR4 interactor with leucine-rich repeats [Source:MGI Symbol;Acc:MGI:1914123]	-	332	349	323	391	246	235	250	4.2086	3.7396	3.89323	4.04522	2.50446	2.62451	2.62503
ENSMUSG00000029312	1013.09	905.419	1044.14	1115.98	720.987	741.624	735.761	0.459437	2.82929e-06	6.3893e-05	Klhl8	5	103861973	103911259	-	3489	protein_coding	kelch-like 8 [Source:MGI Symbol;Acc:MGI:2179430]	-	879	981	1054	1244	754	707	727	25.78	24.32	29.3929	29.777	17.7601	18.2681	17.6613
ENSMUSG00000021360	162.509	133.829	146.615	135.461	97.534	98.6035	107.277	0.4594	0.00404364	0.0280594	Gcnt2	13	40859754	40960892	+	7051	protein_coding	glucosaminyl (N-acetyl) transferase 2, I-branching enzyme [Source:MGI Symbol;Acc:MGI:1100870]	-	141	145	148	151	102	94	106	4.00742	3.48349	3.99959	3.50259	2.32823	2.35372	2.49544
ENSMUSG00000038884	500.205	598.075	747.934	514.033	480.977	444.765	316.772	0.458291	0.00389615	0.0273277	A230050P20Rik	9	20868642	20874307	+	3417	protein_coding	RIKEN cDNA A230050P20 gene [Source:MGI Symbol;Acc:MGI:2441788]	-	434	648	755	573	503	424	313	19.5011	24.6118	32.257	21.0131	18.1516	16.7848	11.6495
ENSMUSG00000021108	197.086	177.207	194.166	188.389	151.082	108.044	139.663	0.458032	0.00286929	0.0217655	Prkch	12	73584796	73778185	+	7530	protein_coding	protein kinase C, eta [Source:MGI Symbol;Acc:MGI:97600]	-	171	192	196	210	158	103	138	3.52068	3.34143	3.83702	3.52871	2.61256	1.86831	2.35345
ENSMUSG00000043587	330.781	275.041	352.668	305.011	231.404	253.851	185.205	0.45776	0.00137521	0.0122835	Pxylp1	9	96823336	96892669	-	6148	protein_coding	2-phosphoxylose phosphatase 1 [Source:MGI Symbol;Acc:MGI:2442444]	-	287	298	356	340	242	242	183	13.9367	12.232	16.4376	13.4749	9.43786	10.3532	7.36081
ENSMUSG00000029552	156.746	132.906	122.84	130.078	92.7529	79.722	110.314	0.457321	0.00783547	0.0460996	Tes	6	17065149	17105828	+	6835	protein_coding	testis derived transcript [Source:MGI Symbol;Acc:MGI:105081]	-	136	144	124	145	97	76	109	4.58396	4.10265	3.97403	3.98874	2.62574	2.25682	3.04315
ENSMUSG00000022790	1484.48	1358.59	1384.92	1328.59	1036.54	982.888	989.785	0.456616	4.45632e-08	1.5181e-06	Igsf11	16	38892671	39027159	+	4493	protein_coding	immunoglobulin superfamily, member 11 [Source:MGI Symbol;Acc:MGI:2388477]	-	1288	1472	1398	1481	1084	937	978	56.9704	55.0354	58.7961	53.4632	38.5072	36.5136	35.8317
ENSMUSG00000034685	540.545	453.171	471.545	516.724	357.625	317.839	387.615	0.456438	0.000107464	0.00149391	Fam171a2	11	102436981	102447682	-	3119	protein_coding	family with sequence similarity 171, member A2 [Source:MGI Symbol;Acc:MGI:2448496]	-	469	491	476	576	374	303	383	24.7359	21.8895	23.8709	24.7938	15.8418	14.0792	16.732
ENSMUSG00000033350	1557.09	1406.58	1465.16	1567.22	1020.28	1111.91	1116.29	0.456241	1.12878e-07	3.5813e-06	Chst2	9	95399292	95406722	-	7328	protein_coding	carbohydrate sulfotransferase 2 [Source:MGI Symbol;Acc:MGI:1891160]	-	1351	1524	1479	1747	1067	1060	1103	12.5336	11.9511	13.0466	13.2276	7.94997	8.66381	8.47603
ENSMUSG00000023460	1211.33	1277.37	1346.28	1261.31	966.734	946.174	850.122	0.454355	3.38522e-07	9.45311e-06	Rab12	17	66494512	66519729	-	3033	protein_coding	RAB12, member RAS oncogene family [Source:MGI Symbol;Acc:MGI:894284]	-	1051	1384	1359	1406	1011	902	840	62.0776	69.0985	76.3237	67.7772	47.9581	46.9375	41.0966
ENSMUSG00000032412	1698.85	1882.83	1510.73	1788.8	1357.83	1127.65	1233.69	0.453329	1.1849e-05	0.000224061	Atp1b3	9	96332655	96364442	-	2389	protein_coding	ATPase, Na+/K+ transporting, beta 3 polypeptide [Source:MGI Symbol;Acc:MGI:107788]	-	1474	2040	1525	1994	1420	1075	1219	106.946	125.112	105.207	118.075	82.7437	68.7159	73.2599
ENSMUSG00000037872	1039.6	919.264	988.66	823.529	698.038	669.245	668.965	0.453314	1.22878e-05	0.000231388	Ackr1	1	173331886	173333750	-	1405	protein_coding	atypical chemokine receptor 1 (Duffy blood group) [Source:MGI Symbol;Acc:MGI:1097689]	-	902	996	998	918	730	638	661	75.3337	70.3142	79.2541	62.5737	48.9649	46.9445	45.7277
ENSMUSG00000026204	2965.5	2804.86	3120.52	3043.83	2179.22	2053.89	2257.88	0.452952	6.57841e-09	2.58278e-07	Ptprn	1	75247027	75264502	-	4249	protein_coding	protein tyrosine phosphatase, receptor type, N [Source:MGI Symbol;Acc:MGI:102765]	-	2573	3039	3150	3393	2279	1958	2231	172.508	172.227	200.811	185.66	122.714	115.655	123.898
ENSMUSG00000059248	494.443	328.572	388.331	456.619	303.12	248.607	332.965	0.451919	0.0028635	0.0217551	2020-09-09	11	117199661	117362325	+	7565	protein_coding	septin 9 [Source:MGI Symbol;Acc:MGI:1858222]	-	429	356	392	509	317	237	329	11.9824	8.40499	10.4107	11.603	7.11091	5.83198	7.61163
ENSMUSG00000001864	341.154	310.113	339.79	348.968	264.872	197.207	255.037	0.451695	0.000669038	0.00690843	Aif1l	2	31950139	31973442	+	4032	protein_coding	allograft inflammatory factor 1-like [Source:MGI Symbol;Acc:MGI:1919598]	-	296	336	343	389	277	188	252	26.3394	25.2728	29.0212	28.2507	19.7958	14.7385	18.5742
ENSMUSG00000021223	284.679	260.273	271.436	300.525	177.856	194.06	226.699	0.450934	0.000797943	0.007949	Papln	12	83763634	83792382	+	5635	protein_coding	papilin, proteoglycan-like sulfated glycoprotein [Source:MGI Symbol;Acc:MGI:2386139]	-	247	282	274	335	186	185	224	4.11067	3.96703	4.33585	4.55016	2.48603	2.71249	3.08787
ENSMUSG00000027966	204.001	187.36	248.651	162.373	137.695	160.493	124.482	0.450154	0.00704033	0.0428627	Col11a1	3	114030540	114220718	+	12744	protein_coding	collagen, type XI, alpha 1 [Source:MGI Symbol;Acc:MGI:88446]	-	177	203	251	181	144	153	123	4.53569	4.3971	6.11578	3.78543	2.96355	3.45416	2.61078
ENSMUSG00000073591	511.731	383.027	470.555	465.59	287.821	317.839	375.471	0.450028	0.000778241	0.00780508	Pcdhb22	18	37517871	37524479	+	6609	protein_coding	protocadherin beta 22 [Source:MGI Symbol;Acc:MGI:2136760]	-	444	415	475	519	301	303	371	6.80301	5.37485	6.92021	6.4901	3.70394	4.09017	4.70855
ENSMUSG00000055254	2162.18	1692.7	1607.81	2074.07	1251.69	1352.13	1464.44	0.449069	0.000132046	0.00178288	Ntrk2	13	58806569	59133970	+	19292	protein_coding	neurotrophic tyrosine kinase, receptor, type 2 [Source:MGI Symbol;Acc:MGI:97384]	-	1876	1834	1623	2312	1309	1289	1447	36.1605	29.8815	29.746	36.3711	20.2638	21.8895	23.1028
ENSMUSG00000022216	461.019	536.237	519.096	468.281	413.085	360.847	292.483	0.448956	0.000573187	0.00608495	Psme1	14	55578123	55581529	+	2209	protein_coding	proteasome (prosome, macropain) activator subunit 1 (PA28 alpha) [Source:MGI Symbol;Acc:MGI:1096367]	-	400	581	524	522	432	344	289	33.4897	41.1176	41.7148	35.6688	29.0479	25.3741	20.0421
ENSMUSG00000024867	239.73	275.041	234.782	256.568	188.375	163.64	188.241	0.448273	0.000856439	0.00837433	Pip5k1b	19	24294794	24555872	-	4035	protein_coding	phosphatidylinositol-4-phosphate 5-kinase, type 1 beta [Source:MGI Symbol;Acc:MGI:107930]	-	208	298	237	286	197	156	186	9.77242	11.8347	10.5875	10.9666	7.43334	6.45721	7.23847
ENSMUSG00000030409	401.086	389.487	466.592	404.588	256.266	322.035	317.784	0.447342	0.000402202	0.00454996	Dmpk	7	19083849	19093821	+	4330	protein_coding	dystrophia myotonica-protein kinase [Source:MGI Symbol;Acc:MGI:94906]	-	348	422	471	451	268	307	314	16.4638	16.8758	21.1875	17.4138	10.1827	12.7959	12.3048
ENSMUSG00000030882	215.526	211.357	241.716	226.964	135.783	166.787	177.109	0.447298	0.00186597	0.0154802	Dnhd1	7	105650827	105721799	+	15081	protein_coding	dynein heavy chain domain 1 [Source:MGI Symbol;Acc:MGI:1924755]	-	187	229	244	253	142	159	175	2.3123	2.39353	2.8688	2.55323	1.41017	1.73213	1.7924
ENSMUSG00000040387	390.713	357.184	350.687	338.203	244.791	256.998	274.266	0.446842	0.000158588	0.00208454	Klhl32	4	24612554	24851124	-	7826	protein_coding	kelch-like 32 [Source:MGI Symbol;Acc:MGI:3612790]	-	339	387	354	377	256	245	271	7.02427	6.77817	6.97449	6.37542	4.2601	4.47248	4.6512
ENSMUSG00000026566	259.323	263.965	288.277	250.288	210.367	179.374	181.157	0.446189	0.000723254	0.0073554	Mpzl1	1	165592240	165634538	-	3550	protein_coding	myelin protein zero-like 1 [Source:MGI Symbol;Acc:MGI:1915731]	-	225	286	291	279	220	171	179	16.754	18.0013	20.6033	16.9554	13.1564	11.218	11.0404
ENSMUSG00000056116	160.204	188.283	220.913	210.816	140.564	132.171	143.711	0.446165	0.00366884	0.0261328	H2-T22	17	36037128	36042747	-	3414	protein_coding	histocompatibility 2, T region locus 22 [Source:MGI Symbol;Acc:MGI:95956]	-	139	204	223	235	147	126	142	4.83613	5.99948	7.37727	6.67293	4.10751	3.8622	4.09229
ENSMUSG00000046546	573.968	502.088	636.982	672.818	386.311	417.491	482.748	0.446121	0.000493659	0.00538187	Fam43a	16	30599723	30602797	+	3075	protein_coding	family with sequence similarity 43, member A [Source:MGI Symbol;Acc:MGI:2676309]	-	498	544	643	750	404	398	477	11.0101	10.1663	13.517	13.5329	7.17336	7.75223	8.73526
ENSMUSG00000036918	145.221	199.358	148.596	201.845	119.527	117.485	131.567	0.445735	0.00764991	0.0454152	Ttc7	17	87282886	87381769	+	6315	protein_coding	tetratricopeptide repeat domain 7 [Source:MGI Symbol;Acc:MGI:1920999]	-	126	216	150	225	125	112	130	4.54912	6.59191	5.1494	6.62988	3.62448	3.56251	3.88772
ENSMUSG00000022297	189.018	154.134	150.577	177.624	142.476	112.24	100.193	0.444046	0.00759277	0.0451597	Fzd6	15	39006034	39038188	+	4818	protein_coding	frizzled class receptor 6 [Source:MGI Symbol;Acc:MGI:108474]	-	164	167	152	198	149	107	99	5.43343	4.67678	4.7883	5.35379	3.96456	3.12317	2.71682
ENSMUSG00000013150	313.493	335.956	359.603	348.071	248.616	244.411	242.892	0.444021	0.000157329	0.00207102	Gfod2	8	105713854	105758664	-	4608	protein_coding	glucose-fructose oxidoreductase domain containing 2 [Source:MGI Symbol;Acc:MGI:1917825]	-	272	364	363	388	260	233	240	9.48291	10.7269	12.0334	11.04	7.27989	7.15665	6.93073
ENSMUSG00000020589	651.189	627.61	693.449	656.67	485.758	457.352	490.844	0.442833	4.53609e-06	9.74313e-05	Fam49a	12	12262139	12380965	+	12596	protein_coding	family with sequence similarity 49, member A [Source:MGI Symbol;Acc:MGI:1261783]	-	565	680	700	732	508	436	485	11.4934	11.6926	13.5396	12.1528	8.29934	7.81391	8.17217
ENSMUSG00000024816	149.831	198.435	214.969	218.89	145.345	121.681	149.783	0.441562	0.00676512	0.0416374	Frmd8	19	5849702	5875274	-	5082	protein_coding	FERM domain containing 8 [Source:MGI Symbol;Acc:MGI:1914707]	-	130	215	217	244	152	116	148	5.27009	7.36738	8.36454	8.07291	4.94877	4.14299	4.96971
ENSMUSG00000031290	424.137	411.638	467.583	410.867	308.858	340.916	281.35	0.440894	0.000170897	0.00222006	Lrch2	X	147470375	147554081	-	6420	protein_coding	leucine-rich repeats and calponin homology (CH) domain containing 2 [Source:MGI Symbol;Acc:MGI:2147870]	-	368	446	472	458	323	325	278	7.30457	7.48311	8.90834	7.41956	5.14906	5.68344	4.57074
ENSMUSG00000039202	1212.48	865.732	915.352	1156.35	670.307	619.943	934.123	0.440537	0.00329186	0.0241539	Abhd2	7	79273199	79365508	+	10573	protein_coding	abhydrolase domain containing 2 [Source:MGI Symbol;Acc:MGI:1914344]	-	1052	938	924	1289	701	591	923	12.656	9.53862	10.5697	12.6561	6.77297	6.26399	9.19769
ENSMUSG00000039546	232.814	208.588	204.072	185.698	157.776	124.828	161.928	0.440061	0.00348014	0.0251265	Ajap1	4	153373221	153482811	-	3048	protein_coding	adherens junction associated protein 1 [Source:MGI Symbol;Acc:MGI:2685419]	-	202	226	206	207	165	119	160	7.52894	7.12019	7.30059	6.29679	4.93907	3.90761	4.93967
ENSMUSG00000040138	144.068	172.593	152.559	148.917	109.965	89.1627	129.542	0.440025	0.00808689	0.0472367	Ndp	X	16885521	16911774	-	1939	protein_coding	Norrie disease (pseudoglioma) (human) [Source:MGI Symbol;Acc:MGI:102570]	-	125	187	154	166	115	85	128	4.38268	5.54207	5.13403	4.75011	3.23822	2.62561	3.71736
ENSMUSG00000042401	435.663	452.248	545.843	407.279	372.924	309.447	312.724	0.439715	0.000818041	0.00809551	Crtac1	19	42283037	42431783	-	2616	protein_coding	cartilage acidic protein 1 [Source:MGI Symbol;Acc:MGI:1920082]	-	378	490	551	454	390	295	309	9.82339	10.7638	13.6154	9.62923	8.13979	6.75418	6.65155
ENSMUSG00000074991	759.528	692.217	763.784	747.276	534.525	537.074	549.543	0.439601	2.33655e-06	5.34353e-05	Gabrr3	16	59407332	59464504	+	4271	protein_coding	gamma-aminobutyric acid (GABA) receptor, rho 3 [Source:MGI Symbol;Acc:MGI:3588203]	-	659	750	771	833	559	512	543	10.4897	10.0911	11.6692	10.8215	7.14609	7.18007	7.15933
ENSMUSG00000028159	301.967	281.501	306.108	261.053	203.674	213.99	205.446	0.439475	0.000499835	0.00543277	Dapp1	3	137931007	137981545	-	4124	protein_coding	dual adaptor for phosphotyrosine and 3-phosphoinositides 1 [Source:MGI Symbol;Acc:MGI:1347063]	-	262	305	309	291	213	204	203	13.1647	12.9542	14.763	11.9335	8.59544	9.03069	8.44891
ENSMUSG00000026109	200.543	229.816	208.035	199.154	165.425	131.122	153.832	0.439323	0.00237742	0.0187089	Tmeff2	1	50900647	51187270	+	6707	protein_coding	transmembrane protein with EGF-like and two follistatin-like domains 2 [Source:MGI Symbol;Acc:MGI:1861735]	-	174	249	210	222	173	125	152	6.10699	7.38716	7.00818	6.35912	4.87644	3.86517	4.41892
ENSMUSG00000053550	305.425	318.42	288.277	317.57	212.28	223.431	232.772	0.438954	0.000287158	0.00341701	Shisa7	7	4825552	4844696	-	6639	protein_coding	shisa family member 7 [Source:MGI Symbol;Acc:MGI:3605641]	-	265	345	291	354	222	213	230	5.70662	6.2799	5.95846	6.2216	3.83941	4.04104	4.10257
ENSMUSG00000030319	337.696	262.119	294.22	310.393	214.192	183.57	249.976	0.438945	0.0021284	0.0172077	Cand2	6	115774538	115805557	+	5474	protein_coding	cullin-associated and neddylation-dissociated 2 (putative) [Source:MGI Symbol;Acc:MGI:1914338]	-	293	284	297	346	224	175	247	3.6389	2.98141	3.50725	3.50707	2.23424	1.91479	2.54094
ENSMUSG00000020844	534.782	484.552	489.377	511.342	360.493	387.071	355.23	0.438714	2.70429e-05	0.000465909	Nxn	11	76257198	76399140	-	3239	protein_coding	nucleoredoxin [Source:MGI Symbol;Acc:MGI:109331]	-	464	525	494	570	377	369	351	17.4956	16.7329	17.7111	17.5409	11.4165	12.258	10.9626
ENSMUSG00000029860	478.307	443.942	442.817	438.677	359.537	341.965	279.326	0.43724	0.000244195	0.00297541	Zyx	6	42349630	42360213	+	5390	protein_coding	zyxin [Source:MGI Symbol;Acc:MGI:103072]	-	415	481	447	489	376	326	276	19.0889	18.7016	19.5501	18.3573	13.8899	13.2109	10.5157
ENSMUSG00000061143	444.883	341.494	382.387	438.677	262.959	215.039	378.507	0.436857	0.00827424	0.0480536	Maml3	3	51685907	52105076	-	10486	protein_coding	mastermind like transcriptional coactivator 3 [Source:MGI Symbol;Acc:MGI:2389461]	-	386	370	386	489	275	205	374	4.94011	4.00269	4.69726	5.10769	2.82658	2.31145	3.96475
ENSMUSG00000115398	142.916	155.979	200.11	165.065	116.658	119.583	119.422	0.436328	0.00648742	0.0404494	Gm534	14	48870258	48881869	-	1682	processed_transcript	predicted gene 534 [Source:MGI Symbol;Acc:MGI:2685380]	-	124	169	202	184	122	114	118	8.60207	9.90988	13.3242	10.4175	6.79704	6.96735	6.78045
ENSMUSG00000032387	549.765	498.396	519.096	411.765	407.348	335.671	328.916	0.435962	0.000850875	0.00833802	Rbpms2	9	65629648	65660528	+	2506	protein_coding	RNA binding protein with multiple splicing 2 [Source:MGI Symbol;Acc:MGI:1919223]	-	477	540	524	459	426	320	325	31.7614	30.3932	33.1758	24.9437	22.7809	18.7721	17.925
ENSMUSG00000026748	414.917	311.036	304.127	376.778	230.448	259.096	270.217	0.435823	0.00190997	0.0157888	Plxdc2	2	16356304	16755839	+	6947	protein_coding	plexin domain containing 2 [Source:MGI Symbol;Acc:MGI:1914698]	-	360	337	307	420	241	247	267	7.8873	6.24103	6.39546	7.51002	4.24054	4.76764	4.84542
ENSMUSG00000017144	420.68	395.025	425.976	420.735	344.238	286.37	274.266	0.435761	0.0002544	0.00307687	Rnd3	2	51130438	51149111	-	4432	protein_coding	Rho family GTPase 3 [Source:MGI Symbol;Acc:MGI:1921444]	-	365	428	430	469	360	273	271	11.5792	11.477	12.9706	12.1429	9.17206	7.63008	7.12114
ENSMUSG00000026249	186.713	194.744	146.615	222.478	130.045	132.171	139.663	0.435604	0.00710502	0.0431255	Serpine2	1	79794197	79861180	-	8287	protein_coding	serine (or cysteine) peptidase inhibitor, clade E, member 2 [Source:MGI Symbol;Acc:MGI:101780]	-	162	211	148	248	136	126	138	6.25763	6.88934	5.43581	7.8183	4.21903	4.28792	4.41539
ENSMUSG00000028634	416.069	393.179	384.369	441.369	280.171	291.615	320.82	0.435048	0.000168427	0.00219625	Hivep3	4	119733784	120138045	+	17627	protein_coding	human immunodeficiency virus type I enhancer binding protein 3 [Source:MGI Symbol;Acc:MGI:106589]	zf-C2H2	361	426	388	492	293	278	317	8.78392	8.76175	8.97678	9.7704	5.72569	5.95946	6.38903
ENSMUSG00000027712	896.682	945.106	999.557	1002.05	750.629	664	696.291	0.434753	3.50331e-06	7.79422e-05	Anxa5	3	36448923	36475894	-	1777	protein_coding	annexin A5 [Source:MGI Symbol;Acc:MGI:106008]	-	778	1024	1009	1117	785	633	688	56.2079	62.5343	69.3133	65.8623	45.5477	40.2905	41.1719
ENSMUSG00000051674	1305.84	1086.32	1120.42	1275.66	834.776	847.57	942.219	0.434192	1.9954e-05	0.000354277	Dcun1d4	5	73481000	73560794	+	5807	protein_coding	DCN1, defective in cullin neddylation 1, domain containing 4 (S. cerevisiae) [Source:MGI Symbol;Acc:MGI:2140972]	-	1133	1177	1131	1422	873	808	931	47.9017	42.0628	45.4665	49.0667	29.6425	30.0964	32.6036
ENSMUSG00000053110	495.595	395.025	446.779	486.223	301.208	301.055	387.615	0.433964	0.0010125	0.00962351	Yap1	9	7931999	8004596	-	9257	protein_coding	yes-associated protein 1 [Source:MGI Symbol;Acc:MGI:103262]	-	430	428	451	542	315	287	383	14.2462	11.986	14.2074	14.6553	8.38146	8.37709	10.5105
ENSMUSG00000020585	2276.28	2753.18	2495.43	2289.37	2094.11	1711.92	1561.59	0.433037	0.00013269	0.00178983	Laptm4a	12	8921664	8938742	+	1773	protein_coding	lysosomal-associated protein transmembrane 4A [Source:MGI Symbol;Acc:MGI:108017]	-	1975	2983	2519	2552	2190	1632	1543	75.7296	96.6835	91.8406	79.863	67.4406	55.1315	49.0072
ENSMUSG00000115008	130.238	136.597	172.372	150.711	108.052	95.4565	112.338	0.432783	0.00849436	0.0489728	4933429O19Rik	14	48878586	48887112	+	2989	processed_transcript	RIKEN cDNA 4933429O19 gene [Source:MGI Symbol;Acc:MGI:1914020]	-	113	148	174	168	113	91	111	7.19982	7.97086	10.5414	8.73611	5.7823	5.10817	5.85816
ENSMUSG00000053930	277.764	275.041	279.361	323.85	192.199	196.158	239.856	0.432441	0.00142339	0.0126173	Shisa6	11	66211725	66525964	-	7449	protein_coding	shisa family member 6 [Source:MGI Symbol;Acc:MGI:2685725]	-	241	298	282	361	201	187	237	5.39308	5.63685	6.00035	6.59315	3.61239	3.68674	4.39302
ENSMUSG00000035184	206.306	185.514	152.559	165.065	112.833	126.926	140.675	0.432213	0.0068437	0.0419777	Fam124a	14	62555737	62608486	+	4406	protein_coding	family with sequence similarity 124, member A [Source:MGI Symbol;Acc:MGI:3645930]	-	179	201	154	184	118	121	139	8.25587	7.83622	6.75365	6.92618	4.3709	4.91673	5.31031
ENSMUSG00000020142	532.477	477.168	606.272	493.4	336.588	368.19	443.278	0.432088	0.000842021	0.0082873	Slc1a4	11	20302180	20332713	-	3926	protein_coding	solute carrier family 1 (glutamate/neutral amino acid transporter), member 4 [Source:MGI Symbol;Acc:MGI:2135601]	-	462	517	612	550	352	351	438	8.05557	7.61983	10.1464	7.82678	4.92919	5.39191	6.32591
ENSMUSG00000031700	233.967	252.89	289.267	280.789	148.213	196.158	225.687	0.432074	0.00517918	0.0341133	Gpt2	8	85492576	85527560	+	5643	protein_coding	glutamic pyruvate transaminase (alanine aminotransferase) 2 [Source:MGI Symbol;Acc:MGI:1915391]	-	203	274	292	313	155	187	223	7.92692	9.04398	10.8418	9.97514	4.86093	6.43326	7.21288
ENSMUSG00000028063	300.815	329.495	337.809	316.673	246.704	226.578	228.723	0.431927	0.000308645	0.00363298	Lmna	3	88480147	88509956	-	5838	protein_coding	lamin A [Source:MGI Symbol;Acc:MGI:96794]	-	261	357	341	353	258	216	226	9.63816	11.1435	11.9734	10.6388	7.6516	7.0273	6.91285
ENSMUSG00000015968	1318.51	1170.31	1318.54	1302.58	865.375	916.802	1028.24	0.431868	6.54221e-06	0.000133974	Cacna1d	14	30039939	30491455	-	12621	protein_coding	calcium channel, voltage-dependent, L type, alpha 1D subunit [Source:MGI Symbol;Acc:MGI:88293]	-	1144	1268	1331	1452	905	874	1016	15.6235	14.6377	17.2838	16.184	9.92613	10.5159	11.4932
ENSMUSG00000024952	852.885	821.43	798.457	928.489	615.803	608.404	647.712	0.43129	6.88794e-06	0.000139626	Rps6ka4	19	6829085	6840601	-	3119	protein_coding	ribosomal protein S6 kinase, polypeptide 4 [Source:MGI Symbol;Acc:MGI:1930076]	-	740	890	806	1035	644	580	640	16.2023	16.4716	16.7799	18.4949	11.3243	11.1881	11.607
ENSMUSG00000026074	2277.43	2150.49	2361.69	2440.09	1588.27	1483.25	1992.73	0.430803	6.71479e-05	0.00100089	Map4k4	1	39900913	40026310	+	9579	protein_coding	mitogen-activated protein kinase kinase kinase kinase 4 [Source:MGI Symbol;Acc:MGI:1349394]	-	1976	2330	2384	2720	1661	1414	1969	61.764	61.5608	70.8537	69.3878	41.6962	38.9385	50.9787
ENSMUSG00000039994	192.475	179.976	245.679	189.286	147.257	125.877	160.916	0.430352	0.00658347	0.0408815	Timeless	10	128232065	128252941	+	6115	protein_coding	timeless circadian clock 1 [Source:MGI Symbol;Acc:MGI:1321393]	-	167	195	248	211	154	120	159	5.57083	5.49843	7.86616	5.74449	4.12575	3.52668	4.39334
ENSMUSG00000040136	330.781	274.118	300.164	253.877	233.317	190.913	203.422	0.43029	0.00198278	0.0162261	Abcc8	7	46104523	46180033	-	8090	protein_coding	ATP-binding cassette, sub-family C (CFTR/MRP), member 8 [Source:MGI Symbol;Acc:MGI:1352629]	-	287	297	303	283	244	182	201	9.92949	8.68564	9.96771	7.99093	6.77975	5.5475	5.76018
ENSMUSG00000002799	943.936	1035.56	956.959	964.372	729.593	704.91	718.556	0.430156	7.24861e-07	1.8661e-05	Jag2	12	112907819	112929776	-	6965	protein_coding	jagged 2 [Source:MGI Symbol;Acc:MGI:1098270]	-	819	1122	966	1075	763	672	710	49.3171	57.1093	55.3093	52.8309	36.8992	35.6504	35.4133
ENSMUSG00000047242	222.442	250.121	252.613	252.98	187.418	146.856	196.338	0.430032	0.0025065	0.0195201	Taf9b	X	106206883	106221158	-	3158	protein_coding	TATA-box binding protein associated factor 9B [Source:MGI Symbol;Acc:MGI:3039562]	-	193	271	255	282	196	140	194	6.67732	7.92528	8.38867	7.96269	5.44603	4.26731	5.55957
ENSMUSG00000048897	212.069	203.05	186.241	191.977	133.87	144.758	151.808	0.429639	0.00235296	0.0185408	Zfp710	7	80024814	80094173	+	6926	protein_coding	zinc finger protein 710 [Source:MGI Symbol;Acc:MGI:1921747]	zf-C2H2	184	220	188	214	140	138	150	3.72627	3.76599	3.62011	3.53701	2.277	2.46216	2.51618
ENSMUSG00000097767	408.002	442.096	556.74	398.308	358.581	322.035	300.579	0.429575	0.00176722	0.014861	Miat	5	112213228	112229395	-	9293	lincRNA	myocardial infarction associated transcript (non-protein coding) [Source:MGI Symbol;Acc:MGI:2444886]	-	354	479	562	444	375	307	297	7.20335	8.23886	10.8736	7.37361	6.12832	5.50365	5.0059
ENSMUSG00000020140	537.087	511.317	542.871	530.18	363.362	410.148	393.688	0.429494	2.7876e-05	0.000478888	Lgr5	10	115450311	115587780	-	10264	protein_coding	leucine rich repeat containing G protein coupled receptor 5 [Source:MGI Symbol;Acc:MGI:1341817]	-	466	554	548	591	380	391	389	13.1728	13.2374	14.7293	13.6347	8.6269	9.73756	9.10829
ENSMUSG00000035805	1782.99	2174.48	2103.13	2122.52	1701.11	1362.62	1434.08	0.429349	5.12075e-05	0.000797589	Mlc1	15	88955884	88979007	-	2801	protein_coding	megalencephalic leukoencephalopathy with subcortical cysts 1 homolog (human) [Source:MGI Symbol;Acc:MGI:2157910]	-	1547	2356	2123	2366	1779	1299	1417	37.6688	48.4917	49.153	47.0189	34.7894	27.8665	28.5796
ENSMUSG00000070047	567.053	448.556	367.528	422.53	266.784	303.153	400.772	0.429324	0.00726226	0.0438877	Fat1	8	44935447	45052257	+	15655	protein_coding	FAT atypical cadherin 1 [Source:MGI Symbol;Acc:MGI:109168]	-	492	486	371	471	279	289	396	3.3752	2.81819	2.42	2.63706	1.53715	1.74668	2.25021
ENSMUSG00000054277	319.255	340.571	329.883	264.642	252.441	194.06	234.796	0.427492	0.00229537	0.0181744	Arfgap3	15	83299739	83350247	-	3841	protein_coding	ADP-ribosylation factor GTPase activating protein 3 [Source:MGI Symbol;Acc:MGI:1913501]	-	277	369	333	295	264	185	232	13.9493	15.7073	15.945	12.1244	10.6772	8.2078	9.67735
ENSMUSG00000027977	517.494	538.083	628.066	527.489	352.844	408.051	451.375	0.427048	0.000434797	0.00483279	Ndst3	3	123526166	123690853	-	9878	protein_coding	N-deacetylase/N-sulfotransferase (heparan glucosaminyl) 3 [Source:MGI Symbol;Acc:MGI:1932544]	-	449	583	634	588	369	389	446	8.63748	9.48003	11.5968	9.23175	5.70094	6.59283	7.10674
ENSMUSG00000046844	3197.17	2838.09	2836.21	3003.46	2205.99	2172.42	2206.27	0.425608	3.78441e-08	1.31151e-06	Vat1l	8	114205612	114374071	+	5462	protein_coding	vesicle amine transport protein 1 like [Source:MGI Symbol;Acc:MGI:2142534]	-	2774	3075	2863	3348	2307	2071	2180	85.4499	80.0665	83.856	84.1699	57.0731	56.2039	55.6233
ENSMUSG00000016487	653.494	668.22	715.243	548.122	480.02	497.213	443.278	0.425222	0.000230188	0.0028432	Ppfibp1	6	146888487	147032025	+	11135	protein_coding	PTPRF interacting protein, binding protein 1 (liprin beta 1) [Source:MGI Symbol;Acc:MGI:1914783]	-	567	724	722	611	502	474	438	18.9234	20.4247	22.9119	16.6427	13.4555	13.9372	12.1084
ENSMUSG00000026305	325.018	355.338	423.994	346.277	246.704	269.586	278.314	0.425016	0.000985523	0.00939689	Lrrfip1	1	90998737	91128944	+	6469	protein_coding	leucine rich repeat (in FLII) interacting protein 1 [Source:MGI Symbol;Acc:MGI:1342770]	-	282	385	428	386	258	257	275	11.1268	12.8405	16.0573	12.4301	8.17562	8.9338	8.98772
ENSMUSG00000037138	897.834	614.688	598.347	798.411	514.444	465.744	600.146	0.424389	0.00383337	0.0269954	Aff3	1	38177326	38664955	-	6654	protein_coding	AF4/FMR2 family, member 3 [Source:MGI Symbol;Acc:MGI:106927]	AF-4	779	666	604	890	538	444	593	20.6954	14.9559	15.2575	19.2972	11.4788	10.3921	13.0493
ENSMUSG00000036053	481.765	478.091	452.723	439.574	308.858	379.728	330.941	0.424327	0.000204596	0.00258921	Fmnl2	2	52857860	53133804	+	5636	protein_coding	formin-like 2 [Source:MGI Symbol;Acc:MGI:1918659]	-	418	518	457	490	323	362	327	5.99522	6.28	6.23237	5.73576	3.72058	4.57424	3.88483
ENSMUSG00000109394	467.934	502.088	656.795	511.342	361.45	420.638	388.627	0.424155	0.00125633	0.0114635	A230057D06Rik	7	61704519	61928690	-	11357	lincRNA	RIKEN cDNA A230057D06 gene [Source:MGI Symbol;Acc:MGI:2442922]	-	406	544	663	570	378	401	384	9.99694	11.3224	15.5225	11.4547	7.47501	8.69894	7.8319
ENSMUSG00000002578	371.12	349.8	364.556	390.234	269.653	258.047	284.386	0.424077	0.000210876	0.00264453	Ikzf4	10	128630843	128645991	-	5995	protein_coding	IKAROS family zinc finger 4 [Source:MGI Symbol;Acc:MGI:1343139]	zf-C2H2	322	379	368	435	282	246	281	11.6317	11.5725	12.6399	12.8246	8.18118	7.82896	8.40793
ENSMUSG00000028249	1081.09	1293.98	1217.5	1224.53	1007.85	844.423	805.592	0.423762	7.31993e-05	0.0010786	Sdcbp	4	6365650	6408423	+	6904	protein_coding	syndecan binding protein [Source:MGI Symbol;Acc:MGI:1337026]	-	938	1402	1229	1365	1054	805	796	43.292	54.6957	53.9342	51.4166	39.0683	32.7327	30.4308
ENSMUSG00000030098	546.307	521.47	528.012	553.505	366.231	388.12	432.146	0.423664	5.88093e-05	0.00089586	Grip2	6	91761509	91827250	-	9359	protein_coding	glutamate receptor interacting protein 2 [Source:MGI Symbol;Acc:MGI:2681173]	-	474	565	533	617	383	370	427	10.1462	10.2229	10.8483	10.779	6.58422	6.97766	7.57094
ENSMUSG00000058056	375.73	350.723	357.621	366.91	263.916	261.194	274.266	0.422983	0.00016184	0.00211802	Palld	8	61511433	61902690	-	10292	protein_coding	palladin, cytoskeletal associated protein [Source:MGI Symbol;Acc:MGI:1919583]	-	326	380	361	409	276	249	271	7.37286	7.26445	7.76307	7.54932	5.0131	4.96134	5.07671
ENSMUSG00000060429	879.393	781.743	618.16	702.422	517.313	527.633	591.037	0.42234	0.000784147	0.00783321	Sntb1	15	55636388	55906949	-	5324	protein_coding	syntrophin, basic 1 [Source:MGI Symbol;Acc:MGI:101781]	-	763	847	624	783	541	503	584	23.0747	21.6518	17.9434	19.3259	13.1398	13.4017	14.6291
ENSMUSG00000021071	2275.13	1820.99	2175.45	2237.34	1381.73	1637.45	1683.04	0.421435	7.85743e-05	0.00114377	Trim9	12	70244533	70347614	-	14203	protein_coding	tripartite motif-containing 9 [Source:MGI Symbol;Acc:MGI:2137354]	-	1974	1973	2196	2494	1445	1561	1663	45.7242	38.6302	48.3659	47.1478	26.881	31.8554	31.907
ENSMUSG00000037509	915.122	758.669	852.942	906.958	673.176	597.915	627.471	0.420974	4.63191e-05	0.000732006	Arhgef4	1	34678188	34813309	+	9861	protein_coding	Rho guanine nucleotide exchange factor (GEF) 4 [Source:MGI Symbol;Acc:MGI:2442507]	-	794	822	861	1011	704	570	620	22.2504	19.471	22.9418	23.1224	15.8441	14.0725	14.3914
ENSMUSG00000031360	594.714	547.313	492.349	540.048	415.954	396.512	388.627	0.420551	9.21684e-05	0.00131047	Ctps2	X	162901238	163032508	+	4720	protein_coding	cytidine 5'-triphosphate synthase 2 [Source:MGI Symbol;Acc:MGI:1933185]	-	516	593	497	602	435	378	384	24.3103	23.6155	22.2641	23.1475	16.4592	15.6897	14.9854
ENSMUSG00000017176	427.595	489.166	530.984	428.809	326.07	353.504	355.23	0.420212	0.000426552	0.00475968	Nt5c3b	11	100422321	100441808	-	3420	protein_coding	5'-nucleotidase, cytosolic IIIB [Source:MGI Symbol;Acc:MGI:1915356]	-	371	530	536	478	341	337	351	27.2967	32.9619	37.498	28.7031	20.1497	21.8447	21.3913
ENSMUSG00000017417	198.238	194.744	201.1	193.772	161.6	120.632	146.747	0.420117	0.00421919	0.0289956	Plxdc1	11	97923238	97986444	-	4836	protein_coding	plexin domain containing 1 [Source:MGI Symbol;Acc:MGI:1919574]	-	172	211	203	216	169	115	145	5.42359	5.62395	6.08643	5.55877	4.27981	3.19476	3.78723
ENSMUSG00000097073	331.934	292.577	347.715	379.469	218.017	260.145	264.145	0.419218	0.00173442	0.0146329	9430037G07Rik	9	88595325	88599516	-	3767	lincRNA	RIKEN cDNA 9430037G07 gene [Source:MGI Symbol;Acc:MGI:2444544]	-	288	317	351	423	228	248	261	7.19832	6.69728	8.34168	8.62869	4.5767	5.46099	5.40349
ENSMUSG00000050447	578.579	559.311	566.647	586.697	469.502	432.177	364.338	0.41917	0.000174669	0.00225195	Lypd6	2	50066429	50193569	+	3729	protein_coding	LY6/PLAUR domain containing 6 [Source:MGI Symbol;Acc:MGI:2443848]	-	502	606	572	654	491	412	360	14.8061	15.1081	16.0413	15.7427	11.6305	10.7057	8.79496
ENSMUSG00000022816	1056.89	1009.71	839.073	1079.2	700.906	671.343	827.857	0.418715	0.000331399	0.00386047	Fstl1	16	37776873	37836514	+	4914	protein_coding	follistatin-like 1 [Source:MGI Symbol;Acc:MGI:102793]	-	917	1094	847	1203	733	640	818	56.8809	57.3607	49.9561	60.9016	36.5157	34.975	42.0286
ENSMUSG00000075028	623.528	576.847	592.403	544.534	407.348	440.569	448.338	0.417217	4.98375e-05	0.000780975	Prdm11	2	92965151	93046167	-	17044	protein_coding	PR domain containing 11 [Source:MGI Symbol;Acc:MGI:2685553]	-	541	625	598	607	426	420	443	9.01235	8.80078	9.47218	8.25269	5.6994	6.16412	6.11279
ENSMUSG00000071176	333.086	311.036	341.771	337.306	239.054	241.264	250.989	0.417211	0.000345266	0.00399104	Arhgef10	8	14911663	15001085	+	9210	protein_coding	Rho guanine nucleotide exchange factor (GEF) 10 [Source:MGI Symbol;Acc:MGI:2444453]	-	289	337	345	376	250	230	248	6.02312	5.93682	6.83676	6.39554	4.18449	4.22311	4.28124
ENSMUSG00000030541	345.764	445.787	444.798	351.659	301.208	309.447	262.121	0.416993	0.00209812	0.0170163	Idh2	7	80094846	80115392	-	2588	protein_coding	isocitrate dehydrogenase 2 (NADP+), mitochondrial [Source:MGI Symbol;Acc:MGI:96414]	-	300	483	449	392	315	295	259	20.0346	27.2651	28.5111	21.3654	16.8946	17.3565	14.327
ENSMUSG00000004508	469.087	323.957	398.238	374.984	301.208	232.872	319.808	0.416966	0.00499104	0.0331528	Gab2	7	97081586	97308946	+	6168	protein_coding	growth factor receptor bound protein 2-associated protein 2 [Source:MGI Symbol;Acc:MGI:1333854]	-	407	351	402	418	315	222	316	6.72243	4.90049	6.31344	5.63475	4.17851	3.23047	4.32329
ENSMUSG00000048148	666.172	631.302	661.748	662.053	414.041	485.675	551.568	0.41692	0.00022416	0.00278209	Nwd1	8	72646711	72717876	+	12067	protein_coding	NACHT and WD repeat domain containing 1 [Source:MGI Symbol;Acc:MGI:2442268]	-	578	684	668	738	433	463	545	6.95853	6.96059	7.6467	7.25124	4.18655	4.91079	5.43477
ENSMUSG00000038156	3103.81	2693.18	2504.34	2885.94	2044.39	1960.53	2219.43	0.415823	1.21897e-05	0.000229781	Spon1	7	113765998	114043370	+	10382	protein_coding	spondin 1, (f-spondin) extracellular matrix protein [Source:MGI Symbol;Acc:MGI:2385287]	-	2693	2918	2528	3217	2138	1869	2193	32.2269	29.5167	28.7652	31.4195	20.548	19.7048	21.7378
ENSMUSG00000032754	149.831	148.596	152.559	172.241	106.14	124.828	109.301	0.415723	0.00735377	0.0442986	Slc8b1	5	120511168	120534024	+	3463	protein_coding	solute carrier family 8 (sodium/lithium/calcium exchanger), member B1 [Source:MGI Symbol;Acc:MGI:2180781]	-	130	161	154	192	111	119	108	5.46902	5.72522	6.1602	6.59225	3.75032	4.41056	3.76344
ENSMUSG00000003644	230.509	184.591	217.941	194.669	140.564	150.003	161.928	0.415638	0.00428392	0.029287	Rps6ka1	4	133847290	133887797	-	4258	protein_coding	ribosomal protein S6 kinase polypeptide 1 [Source:MGI Symbol;Acc:MGI:104558]	-	200	200	220	217	147	143	160	6.87055	5.80754	7.18608	6.08397	4.05563	4.32792	4.55278
ENSMUSG00000034755	259.323	212.28	197.138	255.671	153.951	162.591	188.241	0.415572	0.00577363	0.0371462	Pcdh11x	X	120290259	120910619	+	13946	protein_coding	protocadherin 11 X-linked [Source:MGI Symbol;Acc:MGI:2442849]	-	225	230	199	285	161	155	186	3.30448	2.85528	2.77895	3.4161	1.899	2.00555	2.26271
ENSMUSG00000053560	426.442	351.646	413.097	352.557	294.514	268.537	288.434	0.414811	0.000756548	0.00762088	Ier2	8	84661331	84662852	-	1522	protein_coding	immediate early response 2 [Source:MGI Symbol;Acc:MGI:104815]	-	370	381	417	393	308	256	285	16.527	14.3853	17.7107	14.3269	11.049	10.0743	10.5447
ENSMUSG00000079003	284.679	296.269	367.528	327.438	259.134	211.893	230.748	0.414765	0.00228659	0.0181208	Samd1	8	83997672	84000409	+	2393	protein_coding	sterile alpha motif domain containing 1 [Source:MGI Symbol;Acc:MGI:2142433]	-	247	321	371	365	271	202	228	13.0678	14.3552	18.6632	15.7603	11.5147	9.41536	9.99158
ENSMUSG00000038587	1688.48	1357.67	1392.84	1476.61	1007.85	904.215	1347.04	0.414624	0.0015658	0.0135856	Akap12	10	4266380	4359470	+	6461	protein_coding	A kinase (PRKA) anchor protein (gravin) 12 [Source:MGI Symbol;Acc:MGI:1932576]	-	1465	1471	1406	1646	1054	862	1331	16.5608	14.0559	15.1125	15.1859	9.56893	8.58484	12.4628
ENSMUSG00000040867	1233.23	1085.4	1334.39	1099.83	1006.9	886.382	735.761	0.413791	0.000604639	0.00635717	Begain	12	109032187	109068217	-	4408	protein_coding	brain-enriched guanylate kinase-associated [Source:MGI Symbol;Acc:MGI:3044626]	-	1070	1176	1347	1226	1053	845	727	39.0252	36.2551	46.7129	36.4937	30.8439	27.1518	21.963
ENSMUSG00000042766	267.391	333.187	328.893	313.982	249.572	224.48	212.531	0.413329	0.00162547	0.0139422	Trim46	3	89234177	89246309	-	3792	protein_coding	tripartite motif-containing 46 [Source:MGI Symbol;Acc:MGI:2673000]	-	232	361	332	350	261	214	210	7.34279	9.65786	9.99123	9.04081	6.63426	5.96717	5.50538
ENSMUSG00000051065	431.053	396.871	399.228	442.266	322.245	304.202	300.579	0.412644	0.000196216	0.00249482	Mb21d2	16	28826176	28929673	-	3260	protein_coding	Mab-21 domain containing 2 [Source:MGI Symbol;Acc:MGI:1917028]	-	374	430	403	493	337	290	297	11.2256	10.9096	11.5014	12.0768	8.12359	7.66864	7.38398
ENSMUSG00000038545	765.291	698.677	669.673	829.809	579.467	444.765	613.303	0.412515	0.00117262	0.0108566	Cul7	17	46650337	46664364	+	7410	protein_coding	cullin 7 [Source:MGI Symbol;Acc:MGI:1913765]	-	664	757	676	925	606	424	606	13.98	13.4721	13.533	15.8945	10.2469	7.86478	10.5683
ENSMUSG00000063531	688.071	570.386	625.095	603.742	462.808	457.352	463.519	0.411796	7.30102e-05	0.00107669	Sema3e	5	14025276	14256689	+	9285	protein_coding	sema domain, immunoglobulin domain (Ig), short basic domain, secreted, (semaphorin) 3E [Source:MGI Symbol;Acc:MGI:1340034]	-	597	618	631	673	484	436	458	8.75087	7.65712	8.79456	8.05115	5.69772	5.63047	5.5608
ENSMUSG00000018593	3483	3206.35	3047.21	3261.82	2425.92	2445.16	2412.73	0.411212	6.40821e-08	2.13461e-06	Sparc	11	55394500	55423183	-	3788	protein_coding	secreted acidic cysteine rich glycoprotein [Source:MGI Symbol;Acc:MGI:98373]	-	3022	3474	3076	3636	2537	2331	2384	160.131	155.601	154.98	157.243	107.964	108.819	104.636
ENSMUSG00000039633	842.512	810.355	741	779.572	524.962	629.384	614.315	0.411208	6.82794e-05	0.00101607	Lonrf1	8	36216064	36249516	-	3930	protein_coding	LON peptidase N-terminal domain and ring finger 1 [Source:MGI Symbol;Acc:MGI:3609241]	-	731	878	748	869	549	600	607	12.6454	12.8384	12.3034	12.2688	7.62722	9.14423	8.69758
ENSMUSG00000055435	484.07	386.718	418.051	475.458	322.245	319.937	336.001	0.410793	0.000594206	0.00626576	Maf	8	115682942	115707794	-	8241	protein_coding	avian musculoaponeurotic fibrosarcoma oncogene homolog [Source:MGI Symbol;Acc:MGI:96909]	TF_bZIP	420	419	422	530	337	305	332	5.95978	5.02569	5.69379	6.13795	3.84052	3.81296	3.90224
ENSMUSG00000025964	1403.8	1105.7	1266.04	1305.27	853.901	879.039	1089.98	0.410253	0.000378674	0.00432451	Adam23	1	63445891	63596276	+	17907	protein_coding	a disintegrin and metallopeptidase domain 23 [Source:MGI Symbol;Acc:MGI:1345162]	-	1218	1198	1278	1455	893	838	1077	24.9939	20.7799	24.9359	24.3677	14.7169	15.1499	18.3061
ENSMUSG00000026158	4710.46	3884.72	3925.91	4458.54	3021.64	2796.56	3636.3	0.40999	0.000170985	0.00222006	Ogfrl1	1	23366424	23397772	-	8109	protein_coding	opioid growth factor receptor-like 1 [Source:MGI Symbol;Acc:MGI:1917405]	-	4087	4209	3963	4970	3160	2666	3593	110.04	95.7912	101.456	109.212	68.3301	63.2393	80.1306
ENSMUSG00000015305	1008.48	770.668	781.616	859.413	629.19	598.964	673.014	0.408946	0.000371515	0.00425721	Sash1	10	8722219	8886070	-	8568	protein_coding	SAM and SH3 domain containing 1 [Source:MGI Symbol;Acc:MGI:1917347]	-	875	835	789	958	658	571	665	23.3921	18.869	20.0561	20.9022	14.1275	13.4486	14.7258
ENSMUSG00000030103	1437.23	1221.99	1433.46	1461.36	1080.52	1008.06	1017.11	0.408945	1.39199e-05	0.000257546	Bhlhe40	6	108660629	108666925	+	4705	protein_coding	basic helix-loop-helix family, member e40 [Source:MGI Symbol;Acc:MGI:1097714]	bHLH	1247	1324	1447	1629	1130	961	1005	51.567	46.2801	56.896	54.9785	37.5287	35.0115	34.4244
ENSMUSG00000060487	364.205	323.957	389.322	380.366	222.798	287.419	296.531	0.408678	0.00227901	0.0180983	Samd5	10	9622936	9675208	-	6922	protein_coding	sterile alpha motif domain containing 5 [Source:MGI Symbol;Acc:MGI:2444815]	-	316	351	393	424	233	274	293	5.88575	5.52614	6.96009	6.44535	3.48537	4.49621	4.5204
ENSMUSG00000028184	1618.18	1426.89	1639.51	1469.43	1112.08	1115.06	1217.5	0.408626	6.22339e-06	0.000129207	Adgrl2	3	148815583	148990555	-	14198	protein_coding	adhesion G protein-coupled receptor L2 [Source:MGI Symbol;Acc:MGI:2139714]	-	1404	1546	1655	1638	1163	1063	1203	27.0396	25.1677	30.3067	25.7462	17.9884	18.0363	19.1908
ENSMUSG00000030281	161.357	162.44	153.549	148.02	120.483	102.799	119.422	0.408413	0.0074766	0.0446737	Il17rc	6	113471427	113483140	+	2671	protein_coding	interleukin 17 receptor C [Source:MGI Symbol;Acc:MGI:2159336]	-	140	176	155	165	126	98	118	8.95369	9.51453	9.4257	8.6124	6.47178	5.52181	6.25102
ENSMUSG00000004631	325.018	395.025	427.957	326.541	296.427	268.537	249.976	0.408388	0.0027453	0.0210345	Sgce	6	4674350	4747207	-	10612	protein_coding	sarcoglycan, epsilon [Source:MGI Symbol;Acc:MGI:1329042]	-	282	428	432	364	310	256	247	10.0532	12.8974	14.6436	10.5907	8.87559	8.0404	7.29371
ENSMUSG00000032041	259.323	254.736	269.454	273.613	163.513	176.227	241.88	0.408293	0.0059521	0.0379557	Tirap	9	35184551	35200291	-	4929	protein_coding	toll-interleukin 1 receptor (TIR) domain-containing adaptor protein [Source:MGI Symbol;Acc:MGI:2152213]	-	225	276	272	305	171	168	239	8.17553	8.47702	9.39746	9.04481	4.99009	5.37804	7.19327
ENSMUSG00000031367	856.342	698.677	785.578	747.276	546.955	587.425	589.013	0.408083	7.55025e-05	0.00110801	Ap1s2	X	163909017	163933666	+	4965	protein_coding	adaptor-related protein complex 1, sigma 2 subunit [Source:MGI Symbol;Acc:MGI:1889383]	-	743	757	793	833	572	560	582	22.7532	19.5952	23.0906	20.8193	14.0679	15.1086	14.7629
ENSMUSG00000024143	571.663	566.695	515.133	545.431	399.698	418.54	410.892	0.407698	5.18784e-05	0.00080496	Rhoq	17	86963082	87000069	+	4151	protein_coding	ras homolog family member Q [Source:MGI Symbol;Acc:MGI:1931553]	-	496	614	520	608	418	399	406	14.3673	15.0336	14.3221	14.3735	9.7241	10.1824	9.74126
ENSMUSG00000031099	492.138	491.935	496.311	509.547	373.88	376.581	362.314	0.407641	4.81752e-05	0.000757561	Smarca1	X	47809368	47892974	-	6118	protein_coding	SWI/SNF related, matrix associated, actin dependent regulator of chromatin, subfamily a, member 1 [Source:MGI Symbol;Acc:MGI:1935127]	-	427	533	501	568	391	359	358	11.384	12.0114	12.7003	12.359	8.37188	8.43224	7.90579
ENSMUSG00000051950	314.645	336.879	234.782	298.731	208.455	184.619	257.061	0.407097	0.00856787	0.0492666	B3glct	5	149678230	149762599	+	4798	protein_coding	beta-3-glucosyltransferase [Source:MGI Symbol;Acc:MGI:2685903]	-	273	365	237	333	218	176	254	8.54496	9.65697	7.05349	8.50664	5.48003	4.85335	6.58531
ENSMUSG00000024665	1204.41	1030.94	955.969	1194.03	798.44	777.289	871.375	0.407078	0.000172158	0.00222718	Fads2	19	10064164	10101503	-	1508	protein_coding	fatty acid desaturase 2 [Source:MGI Symbol;Acc:MGI:1930079]	-	1045	1117	965	1331	835	741	861	47.111	42.5657	41.3658	48.9723	30.2323	29.431	32.1517
ENSMUSG00000001911	1907.47	1573.64	1726.69	1976.29	1211.53	1268.21	1527.18	0.406831	0.000267497	0.00321585	Nfix	8	84699876	84800344	-	7351	protein_coding	nuclear factor I/X [Source:MGI Symbol;Acc:MGI:97311]	CTF/NFI	1655	1705	1743	2203	1267	1209	1509	67.6164	58.8815	67.711	73.4572	41.5728	43.5173	51.0668
ENSMUSG00000022231	1643.53	1173.08	1177.87	1353.71	861.55	939.88	1158.8	0.406597	0.0025208	0.0195976	Sema5a	15	32244810	32696341	+	18686	protein_coding	sema domain, seven thrombospondin repeats (type 1 and type 1-like), transmembrane domain (TM) and short cytoplasmic domain, (semaphorin) 5A [Source:MGI Symbol;Acc:MGI:107556]	-	1426	1271	1189	1509	901	896	1145	24.4379	18.4116	19.3747	21.1057	12.4008	13.528	16.2535
ENSMUSG00000038473	247.798	200.281	207.044	271.818	165.425	151.052	192.29	0.406474	0.00852453	0.0490801	Nos1ap	1	170302668	170589861	-	7249	protein_coding	nitric oxide synthase 1 (neuronal) adaptor protein [Source:MGI Symbol;Acc:MGI:1917979]	-	215	217	209	303	173	144	190	9.45445	8.066	8.73881	10.8744	6.10974	5.57881	6.92064
ENSMUSG00000027508	1008.48	685.756	739.018	848.648	551.737	534.976	723.616	0.406072	0.00465366	0.0314213	Pag1	3	9687479	9833679	-	9580	protein_coding	phosphoprotein associated with glycosphingolipid microdomains 1 [Source:MGI Symbol;Acc:MGI:2443160]	-	875	743	746	946	577	510	715	18.394	13.2025	14.9113	16.2302	9.74142	9.44536	12.45
ENSMUSG00000027499	1598.58	1607.79	1696.97	1676.66	1314.8	1176.95	1208.39	0.404961	6.96453e-07	1.79811e-05	Pkia	3	7366669	7445366	+	3721	protein_coding	protein kinase inhibitor, alpha [Source:MGI Symbol;Acc:MGI:104747]	-	1387	1742	1713	1869	1375	1122	1194	61.9947	65.8153	72.802	68.1795	49.3583	44.1827	44.2056
ENSMUSG00000002980	307.73	362.721	250.632	304.114	242.879	186.717	244.916	0.40477	0.00739889	0.0444581	Bcam	7	19756131	19771016	-	3199	protein_coding	basal cell adhesion molecule [Source:MGI Symbol;Acc:MGI:1929940]	-	267	393	253	339	254	178	242	17.0279	21.1857	15.3419	17.6448	13.0096	10.0012	12.7838
ENSMUSG00000019775	512.883	346.108	373.472	396.514	283.996	266.439	346.121	0.404663	0.00658157	0.0408815	Rgs17	10	5825663	5922400	-	8298	protein_coding	regulator of G-protein signaling 17 [Source:MGI Symbol;Acc:MGI:1927469]	-	445	375	377	442	297	254	342	6.44365	4.5899	5.19064	5.22348	3.45388	3.24031	4.10197
ENSMUSG00000029712	434.51	535.314	660.758	521.21	398.742	407.002	388.627	0.404582	0.0025797	0.0199684	Actl6b	5	137553517	137569582	+	4267	protein_coding	actin-like 6B [Source:MGI Symbol;Acc:MGI:1933548]	-	377	580	667	581	417	388	384	24.5969	31.9866	41.3784	30.9373	21.8502	22.3024	20.7523
ENSMUSG00000042359	2210.59	1776.69	2094.22	2221.2	1471.62	1554.58	1627.38	0.404478	4.30144e-05	0.000685378	Osbpl6	2	76406508	76600647	+	10063	protein_coding	oxysterol binding protein-like 6 [Source:MGI Symbol;Acc:MGI:2139014]	-	1918	1925	2114	2476	1539	1482	1608	40.8885	34.6884	42.8515	43.0794	26.3494	27.8344	28.3945
ENSMUSG00000030122	5805.38	7455.63	6939.44	6293.09	5985.91	4885.07	3840.73	0.404185	0.00215407	0.0173684	Ptms	6	124913681	124920103	-	1619	protein_coding	parathymosin [Source:MGI Symbol;Acc:MGI:1916452]	-	5037	8078	7005	7015	6260	4657	3795	500.637	678.665	662.014	569.043	499.695	407.792	312.434
ENSMUSG00000026778	176.34	177.207	165.437	173.138	121.439	115.387	144.723	0.403939	0.00697793	0.0426558	Prkcq	2	11172108	11301222	+	7081	protein_coding	protein kinase C, theta [Source:MGI Symbol;Acc:MGI:97601]	-	153	192	167	193	127	110	143	4.25248	4.51079	4.41342	4.37799	2.83487	2.69355	3.29217
ENSMUSG00000046743	1127.19	832.506	783.597	955.401	631.102	625.188	795.472	0.402946	0.00293049	0.0221057	Fat4	3	38886940	39011985	+	17165	protein_coding	FAT atypical cadherin 4 [Source:MGI Symbol;Acc:MGI:3045256]	-	978	902	791	1065	660	596	786	6.96141	5.42707	5.35356	6.18692	3.77295	3.73754	4.63421
ENSMUSG00000032280	971.597	963.565	933.184	1041.52	717.162	759.456	723.616	0.402797	5.32558e-06	0.00011238	Tle3	9	61372366	61418497	+	11653	protein_coding	transducin-like enhancer of split 3 [Source:MGI Symbol;Acc:MGI:104634]	-	843	1044	942	1161	750	724	715	19.3945	20.3026	20.6067	21.7996	13.8577	14.6747	13.6255
ENSMUSG00000017756	337.696	301.806	287.286	308.599	224.711	195.109	265.157	0.402628	0.00303929	0.0227643	Slc12a7	13	73733094	73816754	+	12669	protein_coding	solute carrier family 12, member 7 [Source:MGI Symbol;Acc:MGI:1342283]	-	293	327	290	344	235	186	262	8.37651	7.90212	7.88318	8.02639	5.39563	4.68478	6.20429
ENSMUSG00000019590	140.611	145.827	146.615	148.02	107.096	110.142	103.229	0.402597	0.00844639	0.0487704	Cyb561	11	105933702	105953336	-	3653	protein_coding	cytochrome b-561 [Source:MGI Symbol;Acc:MGI:103253]	-	122	158	148	165	112	105	102	7.43195	8.13581	8.57261	8.20339	5.47949	5.63526	5.14681
ENSMUSG00000022892	8603.76	8189.38	6973.12	7814.56	6072.93	5693.83	6003.48	0.402571	3.99646e-06	8.76159e-05	App	16	84949685	85173766	-	12996	protein_coding	amyloid beta (A4) precursor protein [Source:MGI Symbol;Acc:MGI:88059]	-	7465	8873	7039	8711	6351	5428	5932	169.619	170.419	152.077	161.54	115.896	108.659	111.646
ENSMUSG00000040711	941.631	720.828	781.616	840.574	577.554	554.907	699.327	0.4022	0.000910217	0.0088426	Sh3pxd2b	11	32347820	32428173	+	9709	protein_coding	SH3 and PX domains 2B [Source:MGI Symbol;Acc:MGI:2442062]	-	817	781	789	937	604	529	691	11.0292	8.91196	10.1276	10.3235	6.54844	6.29156	7.72671
ENSMUSG00000004952	681.155	716.213	833.129	680.892	563.211	589.523	474.652	0.402147	0.000556162	0.00593462	Rasa4	5	136083916	136111860	+	7485	protein_coding	RAS p21 protein activator 4 [Source:MGI Symbol;Acc:MGI:1858600]	-	591	776	841	759	589	562	469	20.0692	22.2744	27.1548	21.0354	16.0634	16.8136	13.192
ENSMUSG00000028214	471.392	569.464	540.89	479.046	434.122	373.434	342.073	0.402036	0.00106051	0.00998504	Gem	4	11704457	11714752	+	2104	protein_coding	GTP binding protein (gene overexpressed in skeletal muscle) [Source:MGI Symbol;Acc:MGI:99844]	-	409	617	546	534	454	356	338	13.9028	17.7281	17.6473	14.8144	12.394	10.6613	9.51676
ENSMUSG00000021215	270.849	289.808	319.977	340.894	221.842	204.55	253.013	0.401731	0.00295435	0.0222577	Net1	13	3882018	3918220	-	5217	protein_coding	neuroepithelial cell transforming gene 1 [Source:MGI Symbol;Acc:MGI:1927138]	-	235	314	323	380	232	195	250	11.843	13.376	15.4777	15.6295	9.38993	8.65787	10.4359
ENSMUSG00000021268	10334.9	11736.3	15786.9	10853.9	8336.29	10077.5	8693.51	0.401634	0.00219578	0.0176102	Meg3	12	109541001	109571726	+	18089	lincRNA	maternally expressed 3 [Source:MGI Symbol;Acc:MGI:1202886]	-	8967	12716	15936	12099	8718	9607	8590	225.616	270.441	381.25	248.449	176.164	212.957	179.024
ENSMUSG00000044043	394.171	323.034	327.902	389.337	251.485	289.517	258.073	0.40125	0.00177139	0.0148822	Pcdhb14	18	37447656	37456350	+	8695	protein_coding	protocadherin beta 14 [Source:MGI Symbol;Acc:MGI:2136749]	-	342	350	331	434	263	276	255	2.67402	2.31316	2.46079	2.76945	1.65148	1.9012	1.65148
ENSMUSG00000048997	276.611	302.729	361.584	275.407	241.923	228.676	204.434	0.401234	0.00389102	0.0273099	Atxn7l2	3	108202222	108210934	-	4946	protein_coding	ataxin 7-like 2 [Source:MGI Symbol;Acc:MGI:1919772]	-	240	328	365	307	253	218	202	7.5643	8.73839	10.9385	7.89699	6.40408	6.05334	5.27356
ENSMUSG00000025534	159.051	192.898	182.278	199.154	146.301	131.122	128.53	0.400967	0.00727672	0.0439603	Gusb	5	129989011	130003049	-	4548	protein_coding	glucuronidase, beta [Source:MGI Symbol;Acc:MGI:95872]	-	138	209	184	222	153	125	127	5.55794	7.11511	7.04629	7.29716	4.94886	4.43533	4.23676
ENSMUSG00000038879	275.459	245.506	262.52	267.333	194.112	227.627	160.916	0.400952	0.00471669	0.0317993	Nipal2	15	34572799	34679212	-	8493	protein_coding	NIPA-like domain containing 2 [Source:MGI Symbol;Acc:MGI:1924488]	-	239	266	265	298	203	217	159	9.11285	8.57311	9.60749	9.27339	6.21629	7.28949	5.02167
ENSMUSG00000044628	443.731	491.935	482.442	493.4	387.267	356.651	327.904	0.400606	0.000285177	0.00340118	Rnf208	2	25242255	25244262	+	1750	protein_coding	ring finger protein 208 [Source:MGI Symbol;Acc:MGI:1916096]	-	385	533	487	550	405	340	324	23.4113	27.3964	28.158	27.2957	19.7788	18.2149	16.3195
ENSMUSG00000026640	4048.9	3429.7	3912.04	3944.51	2687.92	2896.21	3057.4	0.400358	5.38374e-06	0.000113209	Plxna2	1	194618218	194816869	+	17174	protein_coding	plexin A2 [Source:MGI Symbol;Acc:MGI:107684]	-	3513	3716	3949	4397	2811	2761	3021	55.7359	49.8348	59.5733	56.935	35.8176	38.5926	39.7011
ENSMUSG00000050708	1557.09	1648.4	1587.01	1559.14	1363.56	1236.74	958.412	0.399748	0.000434236	0.00483073	Ftl1	7	45457944	45459884	-	1340	protein_coding	ferritin light polypeptide 1 [Source:MGI Symbol;Acc:MGI:95589]	-	1351	1786	1602	1738	1426	1179	947	121.17	135.4	136.618	127.22	102.716	93.1608	70.3531
ENSMUSG00000024026	3758.46	3919.79	4033.89	3963.35	3178.46	2786.07	2894.46	0.39906	2.59476e-07	7.46968e-06	Glo1	17	30592866	30612659	-	1935	protein_coding	glyoxalase 1 [Source:MGI Symbol;Acc:MGI:95742]	-	3261	4247	4072	4418	3324	2656	2860	156.676	172.478	186.023	173.238	128.26	112.424	113.818
ENSMUSG00000033174	2405.37	2735.64	2039.73	2333.33	1741.27	1693.04	1911.76	0.398902	0.000160589	0.00210471	Mgll	6	88724412	88828360	+	5077	protein_coding	monoglyceride lipase [Source:MGI Symbol;Acc:MGI:1346042]	-	2087	2964	2059	2601	1821	1614	1889	79.3528	95.2618	74.4396	80.7135	55.6069	54.066	59.4931
ENSMUSG00000027111	208.611	186.437	194.166	188.389	143.432	159.444	128.53	0.397915	0.00585187	0.0375023	Itga6	2	71745616	71858416	+	9025	protein_coding	integrin alpha 6 [Source:MGI Symbol;Acc:MGI:96605]	-	181	202	196	210	150	152	127	5.50811	5.19608	5.67137	5.21566	3.66602	4.0752	3.20127
ENSMUSG00000029234	668.477	792.819	899.502	749.968	645.446	623.09	466.555	0.397727	0.00288549	0.0218412	Tmem165	5	76183880	76209245	+	2588	protein_coding	transmembrane protein 165 [Source:MGI Symbol;Acc:MGI:894407]	-	580	859	908	836	675	594	461	46.5535	58.2797	69.2975	54.7641	43.5118	42.0041	30.6493
ENSMUSG00000021903	434.51	317.497	360.593	386.646	264.872	260.145	309.687	0.397393	0.00322363	0.0238066	Galnt15	14	32028989	32062197	+	6326	protein_coding	polypeptide N-acetylgalactosaminyltransferase 15 [Source:MGI Symbol;Acc:MGI:1926004]	-	377	344	364	431	277	248	306	5.18406	3.99842	4.75925	4.83696	3.05906	3.00443	3.48534
ENSMUSG00000031938	230.509	250.121	290.258	242.214	204.63	176.227	183.181	0.397391	0.00395881	0.0276411	4931406C07Rik	9	15283337	15306448	-	10871	protein_coding	RIKEN cDNA 4931406C07 gene [Source:MGI Symbol;Acc:MGI:1918234]	-	200	271	293	270	214	168	181	6.56534	7.51964	9.1454	7.23364	5.64183	4.85867	4.92154
ENSMUSG00000007944	217.831	209.511	173.362	206.331	168.294	145.807	132.579	0.397119	0.00814553	0.0474436	Ttc9b	7	27653915	27657346	+	2052	protein_coding	tetratricopeptide repeat domain 9B [Source:MGI Symbol;Acc:MGI:1920282]	-	189	227	175	230	176	139	131	6.26169	6.35706	5.51285	6.21905	4.68297	4.0572	3.59498
ENSMUSG00000026749	205.153	246.429	268.464	236.832	173.075	181.472	179.133	0.396956	0.00422199	0.0289956	Nek6	2	38511643	38594606	+	10714	protein_coding	NIMA (never in mitosis gene a)-related expressed kinase 6 [Source:MGI Symbol;Acc:MGI:1891638]	-	178	267	271	264	181	173	177	3.84286	4.87244	5.56304	4.65163	3.13828	3.2905	3.16521
ENSMUSG00000031392	524.409	569.464	714.252	548.122	450.378	451.058	417.977	0.39673	0.0013783	0.0122962	Irak1	X	74013914	74023918	-	4716	protein_coding	interleukin-1 receptor-associated kinase 1 [Source:MGI Symbol;Acc:MGI:107420]	-	455	617	721	611	471	430	413	20.2307	23.1892	30.482	22.1721	16.819	16.8442	15.2106
ENSMUSG00000026657	1387.67	1042.94	1140.23	1200.31	843.382	858.06	977.641	0.396551	0.000417026	0.00467656	Frmd4a	2	4017717	4614043	+	23350	protein_coding	FERM domain containing 4A [Source:MGI Symbol;Acc:MGI:1919850]	-	1204	1130	1151	1338	882	818	966	31.2893	24.8227	28.4415	28.3787	18.4084	18.7285	20.7942
ENSMUSG00000062184	267.391	260.273	247.66	220.684	196.024	163.64	194.314	0.396493	0.00402986	0.0279962	Hs6st2	X	51387212	51681856	-	7807	protein_coding	heparan sulfate 6-O-sulfotransferase 2 [Source:MGI Symbol;Acc:MGI:1354959]	-	232	282	250	246	205	156	192	5.90945	6.07167	6.0549	5.11399	4.19364	3.50078	4.05093
ENSMUSG00000097823	288.137	354.415	358.612	279.892	253.397	241.264	219.615	0.396455	0.00380616	0.0268562	Gm16701	1	166998295	167000841	-	1627	lincRNA	predicted gene, 16701 [Source:MGI Symbol;Acc:MGI:4439625]	-	250	384	362	312	265	230	217	10.4462	13.5629	14.3826	10.64	8.89293	8.46699	7.5106
ENSMUSG00000026556	244.34	238.123	220.913	262.848	196.024	170.983	172.049	0.395707	0.00343878	0.0248877	Vangl2	1	172000960	172028444	-	6990	protein_coding	VANGL planar cell polarity 2 [Source:MGI Symbol;Acc:MGI:2135272]	-	212	258	223	293	205	163	170	5.08921	5.23521	5.09011	5.74048	3.95227	3.44733	3.38032
ENSMUSG00000020173	844.817	652.529	607.263	765.218	515.4	505.605	584.965	0.395114	0.00184242	0.015343	Cobl	11	12236608	12464960	-	8142	protein_coding	cordon-bleu WH2 repeat [Source:MGI Symbol;Acc:MGI:105056]	-	733	707	613	853	539	482	578	14.5284	11.8449	11.5527	13.7984	8.57988	8.41669	9.48934
ENSMUSG00000049521	186.713	219.663	207.044	223.376	142.476	148.954	175.085	0.394856	0.0063312	0.0396575	Cdc42ep1	15	78842624	78850897	+	2560	protein_coding	CDC42 effector protein (Rho GTPase binding) 1 [Source:MGI Symbol;Acc:MGI:1929763]	-	162	238	209	249	149	142	173	4.30212	5.3425	5.27742	5.39676	3.17784	3.32229	3.80547
ENSMUSG00000032562	4023.54	4090.54	4121.07	4269.25	3238.7	3251.82	2868.15	0.394579	3.15531e-07	8.85925e-06	Gnai2	9	107614125	107635367	-	3779	protein_coding	guanine nucleotide binding protein (G protein), alpha inhibiting 2 [Source:MGI Symbol;Acc:MGI:95772]	-	3491	4432	4160	4759	3387	3100	2834	271.859	291.738	308.031	302.465	211.83	212.685	182.805
ENSMUSG00000040209	1439.53	1174	1088.71	1333.08	842.426	918.9	1066.7	0.394008	0.000966664	0.00926609	Zfp704	3	9427020	9610085	-	15255	protein_coding	zinc finger protein 704 [Source:MGI Symbol;Acc:MGI:2180715]	-	1249	1272	1099	1486	881	876	1054	14.7238	12.6749	12.3186	14.2969	8.34089	9.09793	10.2918
ENSMUSG00000076441	836.749	742.979	752.887	792.131	610.066	557.005	598.122	0.39363	3.81228e-05	0.000620047	Ass1	2	31470207	31520672	+	2414	protein_coding	argininosuccinate synthetase 1 [Source:MGI Symbol;Acc:MGI:88090]	-	726	805	760	883	638	531	591	59.7536	56.0046	59.477	59.3136	42.1723	38.5037	40.2912
ENSMUSG00000099083	1332.34	1221.99	1356.19	1275.66	927.529	1037.43	972.58	0.393418	6.43643e-06	0.000132262	Atf7	15	102525946	102625464	-	10988	protein_coding	activating transcription factor 7 [Source:MGI Symbol;Acc:MGI:2443472]	TF_bZIP	1156	1324	1369	1422	970	989	961	45.9857	44.5199	51.7817	46.1669	30.9896	34.6611	31.6653
ENSMUSG00000064247	250.103	197.512	240.726	233.244	197.937	164.689	148.771	0.393312	0.00829901	0.048163	Plcxd1	5	110099969	110105953	+	3811	protein_coding	phosphatidylinositol-specific phospholipase C, X domain containing 1 [Source:MGI Symbol;Acc:MGI:2685422]	-	217	214	243	260	207	157	147	7.17886	5.98425	7.64381	7.01997	5.49977	4.5759	4.02817
ENSMUSG00000025239	399.934	359.03	425.976	473.664	339.457	283.223	306.651	0.393261	0.00224371	0.0179308	Limd1	9	123478706	123521552	+	6018	protein_coding	LIM domains containing 1 [Source:MGI Symbol;Acc:MGI:1352502]	-	347	389	430	528	355	270	303	12.6491	11.9861	14.9041	15.7083	10.3929	8.67109	9.14884
ENSMUSG00000017774	316.95	295.346	277.38	280.789	199.849	200.354	254.025	0.39314	0.00344697	0.0249369	Myo1c	11	75650504	75673910	+	6585	protein_coding	myosin IC [Source:MGI Symbol;Acc:MGI:106612]	-	275	320	280	313	209	191	251	7.67473	7.54885	7.43012	7.1292	4.68441	4.69618	5.80228
ENSMUSG00000063063	1132.95	843.581	951.015	950.916	755.411	693.371	735.761	0.392168	0.000415645	0.00466688	Ctnna2	6	76881637	77979699	-	6947	protein_coding	catenin (cadherin associated protein), alpha 2 [Source:MGI Symbol;Acc:MGI:88275]	-	983	914	960	1060	790	661	727	26.1662	20.5652	24.2977	23.0281	16.8886	15.5013	16.0293
ENSMUSG00000047810	406.849	480.86	448.76	432.398	358.581	292.663	344.097	0.392017	0.000978537	0.00935161	Ccdc88b	19	6844623	6858211	-	4959	protein_coding	coiled-coil domain containing 88B [Source:MGI Symbol;Acc:MGI:1925567]	-	353	521	453	482	375	279	340	4.83936	6.03742	5.90499	5.39295	4.1288	3.36976	3.86089
ENSMUSG00000033111	243.187	264.888	250.632	247.597	189.331	189.864	186.217	0.391466	0.00194809	0.0160231	3830406C13Rik	14	12284173	12303231	+	4621	protein_coding	RIKEN cDNA 3830406C13 gene [Source:MGI Symbol;Acc:MGI:1917937]	-	211	287	253	276	198	181	184	12.55	14.4292	14.3084	13.3979	9.45813	9.48464	9.06513
ENSMUSG00000040606	432.205	464.247	448.76	424.324	335.632	302.104	360.29	0.391198	0.000476824	0.00523544	Kazn	4	142102390	142239401	-	10721	protein_coding	kazrin, periplakin interacting protein [Source:MGI Symbol;Acc:MGI:1918779]	-	375	503	453	473	351	288	356	10.4015	11.7932	11.9473	10.7076	7.81898	7.03781	8.17917
ENSMUSG00000041261	1892.48	1814.53	1908.97	1984.36	1457.27	1390.94	1476.58	0.389506	4.41496e-07	1.19822e-05	Car8	4	8143362	8239041	-	3853	protein_coding	carbonic anhydrase 8 [Source:MGI Symbol;Acc:MGI:88253]	-	1642	1966	1927	2212	1524	1326	1459	28.9722	29.3219	32.3294	31.8537	21.5959	20.6126	21.3235
ENSMUSG00000074364	258.171	209.511	254.595	263.745	184.55	173.081	194.314	0.389039	0.00491041	0.0327137	Ehd2	7	15946958	15967567	-	5119	protein_coding	EH-domain containing 2 [Source:MGI Symbol;Acc:MGI:2154274]	-	224	227	257	294	193	165	192	5.54366	4.7487	6.04769	5.9383	3.83606	3.59761	3.93591
ENSMUSG00000024913	318.103	265.811	219.922	311.29	204.63	218.186	199.374	0.388786	0.0086073	0.0494303	Lrp5	19	3584828	3686564	-	9738	protein_coding	low density lipoprotein receptor-related protein 5 [Source:MGI Symbol;Acc:MGI:1278315]	-	276	288	222	347	214	208	197	3.81995	3.36932	2.92153	3.91963	2.37871	2.53626	2.25845
ENSMUSG00000042507	724.952	513.163	574.572	595.668	412.129	462.597	478.7	0.388679	0.00233033	0.0183866	Elmsan1	12	84149176	84218881	-	7611	protein_coding	ELM2 and Myb/SANT-like domain containing 1 [Source:MGI Symbol;Acc:MGI:2685106]	-	629	556	580	664	431	441	473	11.5106	8.6005	10.0922	9.91706	6.33439	7.10998	7.16976
ENSMUSG00000056124	1471.8	1157.39	1260.1	1420.99	925.617	971.349	1106.17	0.388055	0.000424509	0.00473983	B4galt6	18	20684599	20746404	-	5808	protein_coding	UDP-Gal:betaGlcNAc beta 1,4-galactosyltransferase, polypeptide 6 [Source:MGI Symbol;Acc:MGI:1928380]	-	1277	1254	1272	1584	968	926	1093	14.9476	12.4073	14.1571	15.1322	9.09987	9.54933	10.5973
ENSMUSG00000018537	389.561	467.015	477.489	347.174	332.763	320.986	290.458	0.387122	0.00426725	0.0291952	Pcgf2	11	97688823	97700497	-	3526	protein_coding	polycomb group ring finger 2 [Source:MGI Symbol;Acc:MGI:99161]	-	338	506	482	387	348	306	287	15.8912	20.109	21.5474	14.8496	13.1401	12.6748	11.1768
ENSMUSG00000023092	1581.29	1730.54	1789.1	1489.17	1449.62	1212.61	1062.65	0.386993	0.000774499	0.00777996	Fhl1	X	56731787	56793346	+	3714	protein_coding	four and a half LIM domains 1 [Source:MGI Symbol;Acc:MGI:1298387]	-	1372	1875	1806	1660	1516	1156	1050	64.1501	74.1045	80.2913	63.3457	56.9274	47.6192	40.6656
ENSMUSG00000031990	320.408	391.333	366.537	308.599	277.303	265.39	237.832	0.386962	0.00306377	0.0229001	Jam3	9	27097384	27155421	-	3200	protein_coding	junction adhesion molecule 3 [Source:MGI Symbol;Acc:MGI:1933825]	-	278	424	370	344	290	253	235	17.6138	22.7077	22.2904	17.7882	14.7565	14.1224	12.3331
ENSMUSG00000091722	490.985	484.552	424.985	482.635	339.457	351.406	375.471	0.386769	0.000438576	0.00486374	Siah3	14	75455982	75529708	+	4472	protein_coding	siah E3 ubiquitin protein ligase family member 3 [Source:MGI Symbol;Acc:MGI:2685758]	-	426	525	429	538	355	335	371	6.47613	6.7463	6.20113	6.67504	4.33424	4.48675	4.67169
ENSMUSG00000039126	4499.54	3173.12	3420.68	4123.03	2430.7	2708.45	3412.63	0.386671	0.00400073	0.0278367	Prune2	19	16956118	17223932	+	20297	protein_coding	prune homolog 2 [Source:MGI Symbol;Acc:MGI:1925004]	-	3904	3438	3453	4596	2542	2582	3372	83.8313	62.4026	70.5019	80.5457	43.838	48.8465	59.9762
ENSMUSG00000045045	350.374	360.876	306.108	348.071	303.12	216.088	246.94	0.386118	0.00490722	0.0327137	Lrfn4	19	4611785	4615667	-	3366	protein_coding	leucine rich repeat and fibronectin type III domain containing 4 [Source:MGI Symbol;Acc:MGI:2385612]	-	304	391	309	388	317	206	244	6.76282	7.35244	6.53613	7.04453	5.6636	4.03741	4.49613
ENSMUSG00000058740	689.223	736.518	877.708	657.567	578.511	596.866	496.917	0.385584	0.00160741	0.0138599	Kcnt1	2	25863734	25918273	+	9499	protein_coding	potassium channel, subfamily T, member 1 [Source:MGI Symbol;Acc:MGI:1924627]	-	598	798	886	733	605	569	491	12.7844	14.4206	18.0103	12.7894	10.3876	10.717	8.69474
ENSMUSG00000037709	395.324	407.946	335.827	352.557	262.003	267.488	311.712	0.385561	0.00224792	0.0179405	Fam13a	6	58932090	59024549	-	10505	protein_coding	family with sequence similarity 13, member A [Source:MGI Symbol;Acc:MGI:1889842]	-	343	442	339	393	274	255	308	8.67828	9.45284	8.15544	8.11518	5.56762	5.68409	6.45484
ENSMUSG00000022722	2454.92	2974.69	3349.36	2493.01	2389.58	2143.05	1830.8	0.385157	0.00198944	0.0162666	Arl6	16	59612949	59639391	-	2098	protein_coding	ADP-ribosylation factor-like 6 [Source:MGI Symbol;Acc:MGI:1927136]	-	2130	3223	3381	2779	2499	2043	1809	117.347	150.09	177.111	124.953	110.57	99.1612	82.5517
ENSMUSG00000047342	255.865	247.352	308.089	257.465	218.973	198.256	183.181	0.385135	0.00500796	0.0332529	Zfp286	11	62752577	62789462	-	7991	protein_coding	zinc finger protein 286 [Source:MGI Symbol;Acc:MGI:2384758]	zf-C2H2	222	268	311	287	229	189	181	11.5651	11.8014	15.4051	12.2024	9.58101	8.67441	7.81035
ENSMUSG00000004347	1619.33	1194.3	1174.9	1415.61	896.93	986.035	1162.85	0.385097	0.00279525	0.0213446	Pde1c	6	56069804	56569103	-	20067	protein_coding	phosphodiesterase 1C [Source:MGI Symbol;Acc:MGI:108413]	-	1405	1294	1186	1578	938	940	1149	28.8486	22.4586	23.1548	26.4436	15.4679	17.0042	19.5417
ENSMUSG00000036760	501.358	445.787	470.555	439.574	305.033	318.888	422.025	0.385096	0.0032105	0.0237371	Kcnk9	15	72501089	72546340	-	12300	protein_coding	potassium channel, subfamily K, member 9 [Source:MGI Symbol;Acc:MGI:3521816]	-	435	483	475	490	319	304	417	2.40432	2.25658	2.49634	2.21037	1.41603	1.48032	1.90912
ENSMUSG00000036502	288.137	323.957	317.996	332.821	242.879	280.076	186.217	0.384645	0.0075556	0.0449668	Tmem255a	X	38196573	38252439	-	4490	protein_coding	transmembrane protein 255A [Source:MGI Symbol;Acc:MGI:3045722]	-	250	351	321	371	254	267	184	6.67558	7.9224	8.15008	8.08517	5.44705	6.28118	4.06969
ENSMUSG00000037824	214.374	216.895	249.642	270.024	184.55	181.472	169.012	0.38386	0.00625776	0.0393129	Tspan14	14	40906445	40966807	-	2650	protein_coding	tetraspanin 14 [Source:MGI Symbol;Acc:MGI:1196325]	-	186	235	252	301	193	173	167	6.78746	7.24875	8.74386	8.96452	5.65628	5.56188	5.04784
ENSMUSG00000047910	580.884	477.168	478.48	557.99	318.42	433.226	429.109	0.383226	0.00416755	0.0287422	Pcdhb16	18	37477814	37483038	+	5225	protein_coding	protocadherin beta 16 [Source:MGI Symbol;Acc:MGI:2136752]	-	504	517	483	622	333	413	424	6.5577	5.68607	5.97553	6.60507	3.47972	4.73426	4.56964
ENSMUSG00000035914	390.713	316.574	360.593	383.058	278.259	276.929	265.157	0.383144	0.00163055	0.0139662	Cd276	9	58524298	58555437	-	3658	protein_coding	CD276 antigen [Source:MGI Symbol;Acc:MGI:2183926]	-	339	343	364	427	291	264	262	12.1811	10.4179	12.4364	12.5222	8.39766	8.3574	7.79799
ENSMUSG00000004113	1146.78	942.338	985.688	948.225	708.556	723.791	851.134	0.38275	0.000459004	0.00506225	Cacna1b	2	24603887	24763152	-	9942	protein_coding	calcium channel, voltage-dependent, N type, alpha 1B subunit [Source:MGI Symbol;Acc:MGI:88296]	-	995	1021	995	1057	741	690	841	15.6078	13.5377	14.8405	13.5319	9.33503	9.53562	10.9272
ENSMUSG00000031673	911.665	894.344	831.148	841.471	681.782	677.637	623.423	0.382715	3.20166e-05	0.000536219	Cdh11	8	102632095	102785642	-	8904	protein_coding	cadherin 11 [Source:MGI Symbol;Acc:MGI:99217]	-	791	969	839	938	713	646	616	14.1552	14.6576	14.276	13.6996	10.2472	10.1848	9.1309
ENSMUSG00000024530	364.205	431.02	439.845	377.675	341.369	308.398	261.109	0.382257	0.00331173	0.0242506	Prelid3a	18	67464849	67480581	+	2167	protein_coding	PRELI domain containing 3A [Source:MGI Symbol;Acc:MGI:2442865]	-	316	467	444	421	357	294	258	9.9137	12.3841	13.2446	10.7795	8.99489	8.126	6.70445
ENSMUSG00000059049	563.595	505.78	585.469	543.637	392.048	409.099	448.338	0.382209	0.000363246	0.00417478	Frem1	4	82897920	83052339	-	13978	protein_coding	Fras1 related extracellular matrix protein 1 [Source:MGI Symbol;Acc:MGI:2670972]	-	489	548	591	606	410	390	443	6.90717	6.54293	7.93756	6.98603	4.65109	4.8533	5.18311
ENSMUSG00000025509	240.882	267.657	250.632	257.465	224.711	178.325	169.012	0.382077	0.00620841	0.0390512	Pnpla2	7	141455198	141460743	+	3020	protein_coding	patatin-like phospholipase domain containing 2 [Source:MGI Symbol;Acc:MGI:1914103]	-	209	290	253	287	235	170	167	9.17873	10.7655	10.5649	10.2869	8.28864	6.57759	6.07502
ENSMUSG00000020029	4678.19	3983.48	3803.07	4599.38	3209.06	3007.41	3507.77	0.381276	0.000125869	0.00170897	Nudt4	10	95547007	95564146	-	3210	protein_coding	nudix (nucleoside diphosphate linked moiety X)-type motif 4 [Source:MGI Symbol;Acc:MGI:1918457]	-	4059	4316	3839	5127	3356	2867	3466	85.965	77.2653	77.3087	88.62	57.0825	53.4948	60.8031
ENSMUSG00000034201	338.849	407.946	417.06	409.97	295.471	288.468	309.687	0.381212	0.00142339	0.0126173	Gas2l1	11	5054132	5065327	-	6100	protein_coding	growth arrest-specific 2 like 1 [Source:MGI Symbol;Acc:MGI:1926176]	-	294	442	421	457	309	275	306	8.76253	11.1354	11.9309	11.1164	7.39639	7.22098	7.55437
ENSMUSG00000026193	1011.94	747.594	911.39	804.69	600.504	640.923	726.652	0.381055	0.00177858	0.0149356	Fn1	1	71585520	71653200	-	11685	protein_coding	fibronectin 1 [Source:MGI Symbol;Acc:MGI:95566]	-	878	810	920	897	628	611	718	14.612	11.3946	14.5583	12.1836	8.39371	8.95855	9.89771
ENSMUSG00000071369	564.748	452.248	517.115	576.829	343.281	386.022	463.519	0.380793	0.00377694	0.0267233	Map3k5	10	19934472	20142753	+	6086	protein_coding	mitogen-activated protein kinase kinase kinase 5 [Source:MGI Symbol;Acc:MGI:1346876]	-	490	490	522	643	359	368	458	16.9614	14.3371	17.1808	18.1653	9.9802	11.2226	13.1319
ENSMUSG00000032501	1094.92	1039.25	932.193	1217.35	843.382	767.848	827.857	0.380139	0.00038135	0.00434407	Trib1	15	59648350	59657099	+	6248	protein_coding	tribbles pseudokinase 1 [Source:MGI Symbol;Acc:MGI:2443397]	-	950	1126	941	1357	882	732	818	17.4318	17.4646	16.4179	20.3219	12.9977	11.8335	12.4328
ENSMUSG00000075256	817.156	747.594	896.53	788.543	593.81	618.894	640.628	0.380113	0.000132833	0.00179042	Cerkl	2	79330543	79456785	-	5284	protein_coding	ceramide kinase-like [Source:MGI Symbol;Acc:MGI:3037816]	-	709	810	905	879	621	590	633	40.573	39.1811	49.2433	41.0531	28.5405	29.7457	30.0047
ENSMUSG00000061981	869.02	982.948	957.95	926.694	780.272	652.461	699.327	0.379806	0.000123811	0.0016852	Flot2	11	78037931	78060434	+	2740	protein_coding	flotillin 2 [Source:MGI Symbol;Acc:MGI:103309]	-	754	1065	967	1033	816	622	691	19.4831	23.2614	23.7586	21.7848	16.9338	14.1598	14.7897
ENSMUSG00000028194	1547.87	1198.92	1327.46	1408.43	999.246	1010.16	1114.27	0.379575	0.000269001	0.00322778	Ddah1	3	145758675	145894277	+	3983	protein_coding	dimethylarginine dimethylaminohydrolase 1 [Source:MGI Symbol;Acc:MGI:1916469]	-	1343	1299	1340	1570	1045	963	1101	40.9797	33.5044	38.8781	39.0983	25.6087	25.8881	27.8275
ENSMUSG00000030102	1748.41	1370.59	1208.58	1347.43	967.69	986.035	1253.93	0.379551	0.00409186	0.0283332	Itpr1	6	108213096	108551109	+	18319	protein_coding	inositol 1,4,5-trisphosphate receptor 1 [Source:MGI Symbol;Acc:MGI:96623]	-	1517	1485	1220	1502	1012	940	1239	37.0445	30.6524	28.3273	29.9346	19.8471	20.2231	25.0613
ENSMUSG00000030393	230.509	229.816	238.745	223.376	166.382	174.13	182.169	0.377678	0.00378301	0.0267557	Zik1	7	10487229	10495394	-	4199	protein_coding	zinc finger protein interacting with K protein 1 [Source:MGI Symbol;Acc:MGI:108070]	zf-C2H2	200	249	241	249	174	166	180	3.23811	3.4077	3.71011	3.29024	2.26251	2.36783	2.41395
ENSMUSG00000030621	237.425	275.041	247.66	217.096	173.075	208.746	170.024	0.377528	0.00805557	0.0471177	Me3	7	89632392	89854359	+	14624	protein_coding	malic enzyme 3, NADP(+)-dependent, mitochondrial [Source:MGI Symbol;Acc:MGI:1916679]	-	206	298	250	242	181	199	168	5.14312	6.28893	5.93482	4.93107	3.62925	4.37718	3.47427
ENSMUSG00000026932	1464.89	1253.37	1246.23	1362.68	988.727	981.839	1076.82	0.377153	5.96143e-05	0.000905062	Nacc2	2	26055535	26123220	-	7815	protein_coding	nucleus accumbens associated 2, BEN and BTB (POZ) domain containing [Source:MGI Symbol;Acc:MGI:1915241]	-	1271	1358	1258	1519	1034	936	1064	40.4531	36.5348	38.071	39.4575	26.4305	26.246	28.0506
ENSMUSG00000027004	599.324	547.313	519.096	555.299	424.56	404.904	438.218	0.376935	0.000260151	0.00314011	Frzb	2	80411970	80447625	-	3237	protein_coding	frizzled-related protein [Source:MGI Symbol;Acc:MGI:892032]	-	520	593	524	619	444	386	433	17.7736	17.1328	17.0299	17.2675	12.1881	11.6236	12.259
ENSMUSG00000030172	653.494	507.625	491.358	620.787	366.231	443.716	476.676	0.376786	0.0052779	0.034574	Erc1	6	119570796	119848167	-	16271	protein_coding	ELKS/RAB6-interacting/CAST family member 1 [Source:MGI Symbol;Acc:MGI:2151013]	-	567	550	496	692	383	423	471	8.65252	7.09452	7.19696	8.6185	4.69394	5.68697	5.95354
ENSMUSG00000030272	408.002	481.783	460.648	420.735	336.588	380.777	289.446	0.376631	0.00265278	0.0204053	Camk1	6	113334124	113343984	-	5975	protein_coding	calcium/calmodulin-dependent protein kinase I [Source:MGI Symbol;Acc:MGI:1098535]	-	354	522	465	469	352	363	286	15.0321	18.7364	18.7749	16.2538	12.0043	13.5801	10.0595
ENSMUSG00000019189	3803.4	3850.57	3932.85	3938.23	2981.48	2965.45	2989.6	0.375936	6.55043e-09	2.57741e-07	Rnf145	11	44518964	44565520	+	7786	protein_coding	ring finger protein 145 [Source:MGI Symbol;Acc:MGI:1921565]	-	3300	4172	3970	4390	3118	2827	2954	132.125	141.193	151.136	143.45	100.259	99.7187	97.966
ENSMUSG00000068740	2042.31	1685.32	1738.58	1846.21	1276.55	1257.72	1635.47	0.375619	0.000893429	0.00869356	Celsr2	3	108390851	108415552	-	11513	protein_coding	cadherin, EGF LAG seven-pass G-type receptor 2 [Source:MGI Symbol;Acc:MGI:1858235]	-	1772	1826	1755	2058	1335	1199	1616	48.7922	42.4999	45.9485	46.2485	29.5221	29.0862	36.8572
ENSMUSG00000039943	3589.03	2856.55	3106.65	3119.18	2261.45	2322.43	2665.74	0.375467	0.000171178	0.00222087	Plcb4	2	135659011	136014593	+	8970	protein_coding	phospholipase C, beta 4 [Source:MGI Symbol;Acc:MGI:107464]	-	3114	3095	3136	3477	2365	2214	2634	128.072	107.596	122.636	116.709	78.1168	80.222	89.7316
ENSMUSG00000048347	404.544	348.877	380.406	357.939	273.478	267.488	307.663	0.375458	0.00157886	0.0136791	Pcdhb18	18	37489465	37494505	+	5041	protein_coding	protocadherin beta 18 [Source:MGI Symbol;Acc:MGI:2136756]	-	351	378	384	399	286	255	304	4.73367	4.30906	4.92413	4.39167	3.09767	3.02979	3.39593
ENSMUSG00000027270	894.376	1038.32	1107.54	1003.84	812.783	817.15	681.11	0.375305	0.000521768	0.00562704	Lamp5	2	136052239	136069917	+	2933	protein_coding	lysosomal-associated membrane protein family, member 5 [Source:MGI Symbol;Acc:MGI:1923411]	-	776	1125	1118	1119	850	779	673	44.5572	54.602	61.0387	52.4387	39.1971	39.4071	32.0085
ENSMUSG00000062151	2709.64	2566.74	2223.99	2179.03	1389.38	1866.12	2226.51	0.375251	0.00612848	0.0387106	Unc13c	9	73479422	73968966	-	8796	protein_coding	unc-13 homolog C [Source:MGI Symbol;Acc:MGI:2149021]	-	2351	2781	2245	2429	1453	1779	2200	20.7196	20.7171	18.8127	17.4711	10.2842	13.8129	16.06
ENSMUSG00000059866	1161.77	1187.84	1202.64	988.594	786.009	972.398	835.954	0.374804	0.000589418	0.00621891	Tnip2	5	34496087	34513991	-	2685	protein_coding	TNFAIP3 interacting protein 2 [Source:MGI Symbol;Acc:MGI:2386643]	-	1008	1287	1214	1102	822	927	826	54.6911	59.0249	62.6301	48.7982	35.8185	44.3116	37.122
ENSMUSG00000022793	187.865	222.432	224.876	204.537	163.513	162.591	149.783	0.374384	0.00746022	0.044635	B4galt4	16	38742264	38769049	+	3213	protein_coding	UDP-Gal:betaGlcNAc beta 1,4-galactosyltransferase, polypeptide 4 [Source:MGI Symbol;Acc:MGI:1928387]	-	163	241	227	228	171	155	148	8.74618	10.9307	11.5815	9.98462	7.36895	7.32729	6.5779
ENSMUSG00000027394	410.307	325.803	325.921	363.322	299.296	245.46	263.133	0.374053	0.00448626	0.030497	Ttl	2	129065942	129096283	+	5945	protein_coding	tubulin tyrosine ligase [Source:MGI Symbol;Acc:MGI:1916987]	-	356	353	329	405	313	234	260	10.5872	8.87373	9.30326	9.82997	7.47574	6.13096	6.40471
ENSMUSG00000008734	949.699	876.808	987.669	1063.95	786.009	752.114	683.134	0.37372	0.000238155	0.00291958	Gprc5b	7	118972047	118995211	-	4630	protein_coding	G protein-coupled receptor, family C, group 5, member B [Source:MGI Symbol;Acc:MGI:1927596]	-	824	950	997	1186	822	717	675	30.6449	29.8645	35.2561	35.9983	24.5517	23.4926	20.7936
ENSMUSG00000040249	6158.06	4852.9	5241.48	5724.33	3597.28	4019.66	4927.67	0.373297	0.00133387	0.011971	Lrp1	10	127538161	127621148	-	17717	protein_coding	low density lipoprotein receptor-related protein 1 [Source:MGI Symbol;Acc:MGI:96828]	-	5343	5258	5291	6381	3762	3832	4869	134.683	112.033	126.815	131.275	76.1595	85.1007	101.663
ENSMUSG00000033214	255.865	289.808	260.539	281.686	201.762	189.864	227.711	0.372537	0.00422119	0.0289956	Slitrk5	14	111675097	111683141	+	5263	protein_coding	SLIT and NTRK-like family, member 5 [Source:MGI Symbol;Acc:MGI:2679448]	-	222	314	263	314	211	181	225	5.3255	6.36704	5.99889	6.14757	4.06508	3.82532	4.4708
ENSMUSG00000023945	316.95	324.88	286.295	261.053	260.091	207.697	205.446	0.372474	0.00749003	0.0446946	Slc5a7	17	54273590	54299034	-	5644	protein_coding	solute carrier family 5 (choline transporter), member 7 [Source:MGI Symbol;Acc:MGI:1927126]	-	275	352	289	291	272	198	203	5.85886	6.33904	5.85445	5.05987	4.65402	3.71644	3.58238
ENSMUSG00000042589	1340.41	1066.01	1089.71	1418.3	847.207	876.941	1074.8	0.372182	0.00333294	0.0243465	Cux2	5	121856366	122050102	-	10082	protein_coding	cut-like homeobox 2 [Source:MGI Symbol;Acc:MGI:107321]	CUT	1163	1155	1100	1581	886	836	1062	36.0043	30.2244	32.3799	39.946	22.0286	22.8015	27.2329
ENSMUSG00000063297	1018.85	723.597	666.701	793.028	583.292	584.278	649.736	0.371973	0.00603762	0.0383383	Luzp2	7	54835498	55268885	+	5617	protein_coding	leucine zipper protein 2 [Source:MGI Symbol;Acc:MGI:1889615]	-	884	784	673	884	610	557	642	17.6344	13.2198	12.7653	14.3922	9.77275	9.78913	10.6081
ENSMUSG00000027864	462.171	453.171	466.592	439.574	309.814	314.692	413.929	0.371622	0.00292684	0.0220942	Ptgfrn	3	101040232	101110278	-	10464	protein_coding	prostaglandin F2 receptor negative regulator [Source:MGI Symbol;Acc:MGI:1277114]	-	401	491	471	490	324	300	409	7.20826	7.4605	8.05035	7.18866	4.67746	4.75104	6.08982
ENSMUSG00000031626	1317.36	1174.92	1305.67	1249.65	896.93	905.264	1094.03	0.371329	0.000215285	0.00269046	Sorbs2	8	45507788	45827906	+	27851	protein_coding	sorbin and SH3 domain containing 2 [Source:MGI Symbol;Acc:MGI:1924574]	-	1143	1273	1318	1393	938	863	1081	33.5807	31.6135	36.8186	33.4011	22.1323	22.3376	26.3066
ENSMUSG00000020524	1372.68	1186.92	1319.53	1399.46	898.843	1012.26	1119.33	0.370008	0.000345522	0.00399144	Gria1	11	57011387	57330244	+	6043	protein_coding	glutamate receptor, ionotropic, AMPA1 (alpha 1) [Source:MGI Symbol;Acc:MGI:95808]	-	1191	1286	1332	1560	940	965	1106	23.6475	21.5832	25.147	25.2793	14.9893	16.8804	18.1896
ENSMUSG00000050530	384.951	340.571	372.481	432.398	280.171	276.929	316.772	0.369882	0.00303087	0.0227271	Fam171a1	2	3114224	3227806	+	4442	protein_coding	family with sequence similarity 171, member A1 [Source:MGI Symbol;Acc:MGI:2442917]	-	334	369	376	482	293	264	313	6.0198	5.62163	6.44364	7.09004	4.24114	4.192	4.67278
ENSMUSG00000051339	973.902	690.371	750.906	928.489	578.511	584.278	737.785	0.369775	0.0069996	0.0427448	2900026A02Rik	5	113086323	113221236	-	10814	protein_coding	RIKEN cDNA 2900026A02 gene [Source:MGI Symbol;Acc:MGI:1920194]	-	845	748	758	1035	605	557	729	7.84147	5.86736	6.68833	7.83875	4.50894	4.55383	5.60355
ENSMUSG00000042444	4141.1	3511.85	3521.73	3818.91	2476.6	2858.45	3267.91	0.369766	0.000492582	0.00537989	Mindy2	9	70599014	70657174	-	8600	protein_coding	MINDY lysine 48 deubiquitinase 2 [Source:MGI Symbol;Acc:MGI:2443086]	-	3593	3805	3555	4257	2590	2725	3229	59.1875	52.982	55.6827	57.2325	34.2651	39.5476	44.0591
ENSMUSG00000025425	204.001	193.821	217.941	187.492	154.907	157.346	143.711	0.369766	0.00821589	0.0477917	St8sia5	18	77185853	77255450	+	2097	protein_coding	ST8 alpha-N-acetyl-neuraminide alpha-2,8-sialyltransferase 5 [Source:MGI Symbol;Acc:MGI:109243]	-	177	210	220	209	162	150	142	6.28365	6.30171	7.42624	6.05551	4.61884	4.69149	4.17563
ENSMUSG00000068015	315.798	347.954	314.033	344.483	227.579	261.194	268.193	0.369089	0.00254301	0.0197249	Lrch1	14	74754675	74947876	-	7734	protein_coding	leucine-rich repeats and calponin homology (CH) domain containing 1 [Source:MGI Symbol;Acc:MGI:2443390]	-	274	377	317	384	238	249	265	9.97197	11.5977	10.9698	11.4059	6.95643	7.98383	7.98861
ENSMUSG00000017400	2201.36	2161.56	2259.65	2067.79	1775.69	1654.23	1583.86	0.368991	4.18646e-06	9.10064e-05	Stac2	11	98036623	98053462	-	3139	protein_coding	SH3 and cysteine rich domain 2 [Source:MGI Symbol;Acc:MGI:2144518]	-	1910	2342	2281	2305	1857	1577	1565	72.1387	74.7691	81.9159	71.0513	56.3282	52.4744	48.9603
ENSMUSG00000019843	1030.38	1141.7	1108.53	1188.64	911.274	779.387	881.496	0.368977	0.000125937	0.00170897	Fyn	10	39368855	39565381	+	4363	protein_coding	Fyn proto-oncogene [Source:MGI Symbol;Acc:MGI:95602]	-	894	1237	1119	1325	953	743	871	31.8208	37.2172	37.8715	38.4907	27.2424	23.2994	25.6795
ENSMUSG00000039982	1205.56	1004.18	1020.36	1074.71	776.447	740.575	949.303	0.368948	0.00105616	0.00996029	Dtx4	19	12466341	12501996	-	5765	protein_coding	deltex 4, E3 ubiquitin ligase [Source:MGI Symbol;Acc:MGI:2672905]	-	1046	1088	1030	1198	812	706	938	12.335	10.8452	11.5492	11.53	7.6903	7.3349	9.16233
ENSMUSG00000024165	204.001	201.204	207.044	220.684	154.907	170.983	148.771	0.36805	0.00733663	0.0442481	Jpt2	17	24937419	24960689	-	4840	protein_coding	Jupiter microtubule associated homolog 2 [Source:MGI Symbol;Acc:MGI:1196260]	-	177	218	209	246	162	163	147	8.91347	9.27963	10.0076	10.1106	6.5519	7.23173	6.13177
ENSMUSG00000019966	363.052	339.648	346.724	408.176	264.872	262.243	306.651	0.368015	0.00304129	0.0227699	Kitl	10	100015630	100100416	+	5911	protein_coding	kit ligand [Source:MGI Symbol;Acc:MGI:96974]	-	315	368	350	455	277	250	303	12.9474	12.7856	13.6788	15.2633	9.14388	9.05301	10.316
ENSMUSG00000060477	346.917	345.185	351.678	329.232	244.791	283.223	259.085	0.367776	0.00164379	0.0140392	Irak2	6	113638467	113695026	+	4412	protein_coding	interleukin-1 receptor-associated kinase 2 [Source:MGI Symbol;Acc:MGI:2429603]	-	301	374	355	367	256	270	256	14.34	15.0611	16.0812	14.2697	9.79495	11.3326	10.1023
ENSMUSG00000022186	2181.77	1913.29	1825.75	1896.45	1635.13	1389.89	1479.62	0.366189	0.000135795	0.00182163	Oxct1	15	4026383	4155344	+	3701	protein_coding	3-oxoacid CoA transferase 1 [Source:MGI Symbol;Acc:MGI:1914291]	-	1893	2073	1843	2114	1710	1325	1462	92.9869	86.0738	86.0805	84.7505	67.46	57.3414	59.4858
ENSMUSG00000008393	425.29	415.33	436.873	447.648	331.807	289.517	368.386	0.365957	0.00174659	0.0147219	Carhsp1	16	8658580	8672155	-	2858	protein_coding	calcium regulated heat stable protein 1 [Source:MGI Symbol;Acc:MGI:1196368]	CSD	369	450	441	499	347	276	364	8.77751	9.04812	9.97451	9.6875	6.62909	5.78409	7.17202
ENSMUSG00000029802	276.611	244.583	256.576	264.642	197.937	210.844	187.229	0.365818	0.00420188	0.0289126	Abcg2	6	58584523	58695676	+	8153	protein_coding	ATP binding cassette subfamily G member 2 (Junior blood group) [Source:MGI Symbol;Acc:MGI:1347061]	-	240	265	259	295	207	201	185	12.4551	11.6247	12.7804	12.4947	8.62751	9.18995	7.95248
ENSMUSG00000024992	2927.47	2961.76	2899.61	2678.71	2313.09	2320.33	1994.75	0.365171	2.33219e-05	0.000408837	Pde6c	19	38132781	38183958	+	2970	protein_coding	phosphodiesterase 6C, cGMP specific, cone, alpha prime [Source:MGI Symbol;Acc:MGI:105956]	-	2540	3209	2927	2986	2419	2212	1971	63.0218	67.3019	69.0538	60.4662	48.2027	48.353	40.5078
ENSMUSG00000027479	1784.14	1568.1	1573.14	1656.03	1258.38	1250.38	1296.44	0.364977	1.28188e-05	0.000239387	Mapre1	2	153741274	153773310	+	7811	protein_coding	microtubule-associated protein, RP/EB family, member 1 [Source:MGI Symbol;Acc:MGI:891995]	-	1548	1699	1588	1846	1316	1192	1281	37.0953	34.4145	36.1832	36.1032	25.327	25.1655	25.4268
ENSMUSG00000035776	774.512	735.595	812.326	810.97	559.386	601.062	647.712	0.364934	0.000185819	0.00237999	Cd99l2	X	71420060	71492849	-	4902	protein_coding	CD99 antigen-like 2 [Source:MGI Symbol;Acc:MGI:2177151]	-	672	797	820	904	585	573	640	20.8228	20.8751	24.1598	22.8615	14.5581	15.6425	16.4265
ENSMUSG00000021098	1235.53	1508.11	1655.36	1227.22	1042.28	1216.81	967.52	0.363932	0.00365344	0.026085	4930447C04Rik	12	72881109	72940774	-	5981	protein_coding	RIKEN cDNA 4930447C04 gene [Source:MGI Symbol;Acc:MGI:1923051]	-	1072	1634	1671	1368	1090	1160	956	58.9159	75.9085	87.3217	61.3606	48.1109	56.1664	43.5202
ENSMUSG00000036206	539.392	447.633	463.62	560.682	358.581	369.239	426.073	0.363668	0.0031457	0.0233768	Sh3bp4	1	89070415	89155068	+	5112	protein_coding	SH3-domain binding protein 4 [Source:MGI Symbol;Acc:MGI:2138297]	-	468	485	468	625	375	352	421	11.9252	10.4463	11.339	12.9977	7.67418	7.90215	8.88584
ENSMUSG00000090946	336.544	342.416	342.762	383.058	271.565	293.712	241.88	0.363451	0.00294687	0.0222106	Ccdc71l	12	32378704	32382943	+	4240	protein_coding	coiled-coil domain containing 71 like [Source:MGI Symbol;Acc:MGI:1919373]	-	292	371	346	427	284	280	239	4.68192	5.02824	5.27504	5.58773	3.65712	3.95531	3.1742
ENSMUSG00000039239	1652.75	1406.58	1463.18	1612.97	1172.32	1103.52	1268.1	0.363409	0.000135519	0.00181981	Tgfb2	1	186622792	186705989	-	5791	protein_coding	transforming growth factor, beta 2 [Source:MGI Symbol;Acc:MGI:98726]	-	1434	1524	1477	1798	1226	1052	1253	53.3603	47.9352	52.2585	54.604	36.6385	34.4878	38.6202
ENSMUSG00000026114	323.866	304.575	291.248	258.362	246.704	205.599	220.627	0.36288	0.0063141	0.0395779	Cnga3	1	37214434	37263384	+	3957	protein_coding	cyclic nucleotide gated channel alpha 3 [Source:MGI Symbol;Acc:MGI:1341818]	-	281	330	294	288	258	196	218	9.00685	8.9409	8.96029	7.53399	6.64149	5.53483	5.78786
ENSMUSG00000067279	573.968	533.468	577.544	618.095	447.509	394.414	484.772	0.362487	0.00108008	0.0101456	Ppp1r3c	19	36731737	36736653	-	2719	protein_coding	protein phosphatase 1, regulatory subunit 3C [Source:MGI Symbol;Acc:MGI:1858229]	-	498	578	583	689	468	376	479	12.4517	12.2159	13.8604	14.0599	9.39773	8.28261	9.92039
ENSMUSG00000036295	1025.77	935.877	924.268	928.489	734.374	718.547	753.978	0.362408	4.36093e-05	0.000693631	Lrrn3	12	41451668	41486431	-	3865	protein_coding	leucine rich repeat protein 3, neuronal [Source:MGI Symbol;Acc:MGI:106036]	-	890	1014	933	1035	768	685	745	15.6548	15.0764	15.6044	14.8581	10.8492	10.6152	10.8545
ENSMUSG00000028469	1005.02	1015.25	1097.63	968.858	806.09	776.24	784.339	0.361896	3.97455e-05	0.000642221	Npr2	4	43631935	43651244	+	4667	protein_coding	natriuretic peptide receptor 2 [Source:MGI Symbol;Acc:MGI:97372]	-	872	1100	1108	1080	843	740	775	38.0258	40.5466	45.9419	38.4371	29.5235	28.4298	27.9935
ENSMUSG00000027889	1296.62	1429.66	1353.22	1299.88	1171.36	1065.76	865.303	0.361641	0.000928626	0.00895865	Ampd2	3	108074062	108086651	-	5224	protein_coding	adenosine monophosphate deaminase 2 [Source:MGI Symbol;Acc:MGI:88016]	-	1125	1549	1366	1449	1225	1016	855	38.53	44.8434	44.4842	40.5025	33.6947	30.6564	24.2554
ENSMUSG00000057777	646.579	574.078	560.703	617.198	515.4	419.589	446.314	0.36143	0.00119487	0.0110302	Mab21l2	3	86545581	86548629	-	3049	protein_coding	mab-21-like 2 (C. elegans) [Source:MGI Symbol;Acc:MGI:1346022]	-	561	622	566	688	539	400	441	14.4412	13.5341	13.8536	14.4542	11.1431	9.07152	9.40313
ENSMUSG00000021555	1290.85	1335.52	1390.86	1256.82	1082.44	994.426	979.665	0.36135	2.64567e-05	0.000456683	Naa35	13	59585259	59635922	+	8861	protein_coding	N(alpha)-acetyltransferase 35, NatC auxiliary subunit [Source:MGI Symbol;Acc:MGI:1925939]	-	1120	1447	1404	1401	1132	948	968	71.9681	78.5942	85.7821	73.4727	58.4181	53.6675	51.5219
ENSMUSG00000027168	5333.99	5563.58	5484.19	5424.71	4436.84	4107.78	4132.2	0.361187	1.08995e-07	3.4703e-06	Pax6	2	105668900	105697364	+	11694	protein_coding	paired box 6 [Source:MGI Symbol;Acc:MGI:97490]	PAX	4628	6028	5536	6047	4640	3916	4083	179.379	197.493	204.024	191.286	144.436	133.722	131.085
ENSMUSG00000001334	836.749	706.984	769.728	836.985	538.35	528.682	740.821	0.360803	0.00526235	0.0345098	Fndc5	4	129136999	129144593	+	2763	protein_coding	fibronectin type III domain containing 5 [Source:MGI Symbol;Acc:MGI:1917614]	-	726	766	777	933	563	504	732	17.8634	15.9315	18.1784	18.7359	11.1254	10.9254	14.9188
ENSMUSG00000052310	801.02	629.456	766.756	791.234	576.598	543.368	603.182	0.360389	0.00123854	0.0113298	Slc39a1	3	90248172	90253612	+	2364	protein_coding	solute carrier family 39 (zinc transporter), member 1 [Source:MGI Symbol;Acc:MGI:1353474]	-	695	682	774	882	603	518	596	19.9869	16.5785	21.1645	20.7012	13.927	13.1241	14.1971
ENSMUSG00000039756	1408.41	1481.34	1688.05	1456.87	1124.51	1115.06	1255.95	0.359997	0.000172438	0.0022292	Dnttip2	3	122274388	122285271	+	3309	protein_coding	deoxynucleotidyltransferase, terminal, interacting protein 2 [Source:MGI Symbol;Acc:MGI:1923173]	-	1222	1605	1704	1624	1176	1063	1241	76.7806	85.2424	101.802	83.2784	59.3426	58.843	64.5873
ENSMUSG00000036606	2111.47	1725.93	1520.63	1864.15	1399.9	1261.91	1500.87	0.359867	0.00183666	0.0153092	Plxnb2	15	89155549	89180788	-	7720	protein_coding	plexin B2 [Source:MGI Symbol;Acc:MGI:2154239]	-	1832	1870	1535	2078	1464	1203	1483	58.0368	50.0749	46.2375	53.7266	37.2475	33.5757	38.9147
ENSMUSG00000057182	645.426	560.234	626.085	627.066	456.115	460.499	505.013	0.359632	0.000477032	0.00523544	Scn3a	2	65457118	65567627	-	12459	protein_coding	sodium channel, voltage-gated, type III, alpha [Source:MGI Symbol;Acc:MGI:98249]	-	560	607	632	699	477	439	499	6.92958	6.34904	7.43607	7.05931	4.74041	4.78591	5.11463
ENSMUSG00000028556	1342.72	1185.07	1288.82	1283.74	939.96	974.496	1045.45	0.358843	4.67732e-05	0.000738091	Dock7	4	98936671	99120915	-	16818	protein_coding	dedicator of cytokinesis 7 [Source:MGI Symbol;Acc:MGI:1914549]	-	1165	1284	1301	1431	983	929	1033	29.2688	27.2675	31.0788	29.3417	19.8341	20.5625	21.4969
ENSMUSG00000017412	1137.56	874.962	1002.53	1083.69	741.067	804.562	822.797	0.358788	0.000951104	0.00914905	Cacnb4	2	52428320	52676831	-	8963	protein_coding	calcium channel, voltage-dependent, beta 4 subunit [Source:MGI Symbol;Acc:MGI:103301]	-	987	948	1012	1208	775	767	813	12.346	10.0234	12.0364	12.3322	7.78554	8.45248	8.42351
ENSMUSG00000064043	450.646	381.181	454.704	445.854	334.676	326.231	339.037	0.358163	0.00161358	0.0138865	Trerf1	17	47140875	47361958	+	9070	processed_transcript	transcriptional regulating factor 1 [Source:MGI Symbol;Acc:MGI:2442086]	zf-C2H2	391	413	459	497	350	311	335	6.15747	5.49763	6.87299	6.38775	4.42662	4.31486	4.36984
ENSMUSG00000013275	1121.43	1238.61	1206.6	1178.78	864.419	910.509	982.701	0.3579	5.43205e-05	0.000834535	Slc41a1	1	131827493	131848865	+	4912	protein_coding	solute carrier family 41, member 1 [Source:MGI Symbol;Acc:MGI:2444823]	-	973	1342	1218	1314	904	868	971	35.298	41.152	42.0139	38.9044	26.3381	27.7421	29.1778
ENSMUSG00000032320	2018.11	2138.49	1904.01	2010.38	1687.72	1607.03	1390.56	0.357633	0.00010839	0.00150138	Rcn2	9	56041845	56061882	+	4745	protein_coding	reticulocalbin 2 [Source:MGI Symbol;Acc:MGI:1349765]	-	1751	2317	1922	2241	1765	1532	1374	61.4877	68.7747	64.1746	64.2259	49.7767	47.396	39.9654
ENSMUSG00000034462	1147.94	1156.46	1163.01	1194.03	878.762	901.068	934.123	0.356844	9.47519e-06	0.000185802	Pkd2	5	104459450	104505819	+	10169	protein_coding	polycystic kidney disease 2 [Source:MGI Symbol;Acc:MGI:1099818]	-	996	1253	1174	1331	919	859	923	16.0837	17.1032	18.0261	17.5416	11.9184	12.2208	12.3459
ENSMUSG00000042258	1500.62	1558.87	1758.39	1444.32	1254.56	1268.21	1112.24	0.356157	0.000285078	0.00340118	Isl1	13	116298281	116309689	-	3959	protein_coding	ISL1 transcription factor, LIM/homeodomain [Source:MGI Symbol;Acc:MGI:101791]	Homeobox	1302	1689	1775	1610	1312	1209	1099	64.7042	70.9498	83.874	65.3	52.3642	52.9333	45.2391
ENSMUSG00000020580	3350.45	2685.8	2958.05	2945.15	2085.51	2367.53	2477.5	0.355771	0.000316401	0.00371941	Rock2	12	16894895	16987823	+	13897	protein_coding	Rho-associated coiled-coil containing protein kinase 2 [Source:MGI Symbol;Acc:MGI:107926]	-	2907	2910	2986	3283	2181	2257	2448	40.7905	34.5149	39.8393	37.5968	24.5781	27.9014	28.4525
ENSMUSG00000031217	439.12	473.476	430.929	412.662	369.099	315.741	330.941	0.355447	0.00172789	0.0145915	Efnb1	X	99136130	99148991	+	3452	protein_coding	ephrin B1 [Source:MGI Symbol;Acc:MGI:102708]	-	381	513	435	460	386	301	327	12.747	14.5078	13.8382	12.5605	10.3717	8.8722	9.06205
ENSMUSG00000000266	532.477	419.945	461.639	505.062	352.844	336.72	416.965	0.355241	0.00448423	0.030497	Mid2	X	140664599	140767715	+	8114	protein_coding	midline 2 [Source:MGI Symbol;Acc:MGI:1344333]	-	462	455	466	563	369	321	412	8.95599	7.45562	8.58945	8.9073	5.74483	5.48224	6.61552
ENSMUSG00000029752	771.054	698.677	826.195	688.965	596.679	542.319	591.037	0.355213	0.000682802	0.00702327	Asns	6	7675169	7693254	-	2735	protein_coding	asparagine synthetase [Source:MGI Symbol;Acc:MGI:1350929]	-	669	757	834	768	624	517	584	46.174	44.1639	54.7325	43.2612	34.5887	31.4371	33.3871
ENSMUSG00000049866	1416.48	1222.92	1188.77	1336.66	902.668	937.782	1151.71	0.354872	0.00130533	0.0117704	Arl4c	1	88673125	88702221	-	5492	protein_coding	ADP-ribosylation factor-like 4C [Source:MGI Symbol;Acc:MGI:2445172]	-	1229	1325	1200	1490	944	894	1138	26.449	24.1032	24.5554	26.1704	16.3158	16.9503	20.2859
ENSMUSG00000031517	7009.79	6408.08	6260.85	6790.08	5459.99	4821.08	5148.3	0.354855	7.6296e-06	0.00015277	Gpm6a	8	54954843	55060871	+	3215	protein_coding	glycoprotein m6a [Source:MGI Symbol;Acc:MGI:107671]	-	6082	6943	6320	7569	5710	4596	5087	128.609	124.101	127.072	130.626	96.9709	85.6224	89.1011
ENSMUSG00000026188	282.374	340.571	304.127	339.997	253.397	232.872	246.94	0.353049	0.00486828	0.0325051	Tmem169	1	72284369	72303104	+	3054	protein_coding	transmembrane protein 169 [Source:MGI Symbol;Acc:MGI:2442781]	-	245	369	307	379	265	222	244	9.19211	11.7024	10.9521	11.6052	7.98498	7.3381	7.58288
ENSMUSG00000027009	2012.35	1762.84	2056.57	1917.98	1430.5	1609.12	1476.58	0.35297	7.75368e-05	0.00113141	Itga4	2	79255426	79333123	+	13978	protein_coding	integrin alpha 4 [Source:MGI Symbol;Acc:MGI:96603]	-	1746	1910	2076	2138	1496	1534	1459	32.3434	29.9072	36.5659	32.3233	22.2562	25.035	22.3868
ENSMUSG00000033295	3272.08	2546.43	2670.77	2982.83	2065.43	2102.14	2491.67	0.35277	0.00115329	0.0107241	Ptprf	4	118208213	118291405	-	9148	protein_coding	protein tyrosine phosphatase, receptor type, F [Source:MGI Symbol;Acc:MGI:102695]	-	2839	2759	2696	3325	2160	2004	2462	58.0297	47.6691	52.3978	55.468	35.4583	36.0881	41.6839
ENSMUSG00000001794	1821.02	1893.9	1832.69	1698.19	1548.11	1440.24	1228.63	0.352516	0.000293115	0.00347973	Capns1	7	30186936	30198811	-	2477	protein_coding	calpain, small subunit 1 [Source:MGI Symbol;Acc:MGI:88266]	-	1580	2052	1850	1893	1619	1373	1214	103.383	113.493	115.099	101.09	85.0781	79.1487	65.7969
ENSMUSG00000050592	380.34	464.247	560.703	472.767	363.362	370.287	351.182	0.352498	0.00748576	0.0446946	Fam78a	2	32050055	32084857	-	5973	protein_coding	family with sequence similarity 78, member A [Source:MGI Symbol;Acc:MGI:2443569]	-	330	503	566	527	380	353	347	10.8959	14.0385	17.7695	14.2013	10.0766	10.2685	9.4902
ENSMUSG00000029119	518.646	403.332	436.873	482.635	319.376	345.112	399.76	0.351376	0.00585539	0.0375115	Man2b2	5	36806921	36830653	-	3528	protein_coding	mannosidase 2, alpha B2 [Source:MGI Symbol;Acc:MGI:1195262]	-	450	437	441	538	334	329	395	16.69	13.7002	15.5522	16.2852	9.94879	10.7503	12.1349
ENSMUSG00000040043	214.374	206.742	229.829	211.713	169.25	159.444	169.012	0.351127	0.00867661	0.0497016	Rbms2	10	128131558	128180297	-	4484	protein_coding	RNA binding motif, single stranded interacting protein 2 [Source:MGI Symbol;Acc:MGI:1861776]	-	186	224	232	236	177	152	167	9.63065	9.80373	11.4219	9.97288	7.36029	6.93374	7.16233
ENSMUSG00000050896	643.121	655.298	595.375	634.243	543.131	510.85	413.929	0.350423	0.00212793	0.0172077	Rtn4rl2	2	84871924	84886710	-	1506	protein_coding	reticulon 4 receptor-like 2 [Source:MGI Symbol;Acc:MGI:2669796]	-	558	710	601	707	568	487	409	36.5464	39.3069	37.4276	37.7916	29.877	28.1009	22.1885
ENSMUSG00000021219	1717.29	1385.36	1477.05	1518.77	1114.95	1175.9	1263.04	0.350134	0.00036402	0.00418044	Rgs6	12	82588292	83162056	+	10023	protein_coding	regulator of G-protein signaling 6 [Source:MGI Symbol;Acc:MGI:1354730]	-	1490	1501	1491	1693	1166	1121	1248	63.7485	54.2831	60.6553	59.1162	40.0646	42.2542	44.2276
ENSMUSG00000024302	1173.29	1113.08	1086.73	1151.86	817.565	889.529	936.147	0.350009	7.87552e-05	0.00114548	Dtna	18	23415135	23659715	+	16930	protein_coding	dystrobrevin alpha [Source:MGI Symbol;Acc:MGI:106039]	-	1018	1206	1097	1284	855	848	925	26.9291	26.9663	27.5924	27.7208	18.1643	19.7629	20.268
ENSMUSG00000050192	753.766	707.907	757.84	769.704	589.029	541.27	613.303	0.349797	0.000239518	0.0029323	Eif5a2	3	28781276	28798846	+	5027	protein_coding	eukaryotic translation initiation factor 5A2 [Source:MGI Symbol;Acc:MGI:1933735]	-	654	767	765	858	616	516	606	8.84456	8.76788	9.83712	9.47004	6.69049	6.14794	6.78838
ENSMUSG00000019528	378.035	393.179	401.21	374.984	356.669	274.831	263.133	0.34979	0.00679502	0.0417643	Gyg	3	20122084	20155317	-	2344	protein_coding	glycogenin [Source:MGI Symbol;Acc:MGI:1351614]	-	328	426	405	418	373	262	260	14.8362	16.2877	17.4185	15.4309	13.5499	10.4407	9.7413
ENSMUSG00000002055	610.85	677.449	846.998	626.169	541.218	558.054	500.965	0.349604	0.00540265	0.0351611	Spag5	11	78301529	78322457	+	5624	protein_coding	sperm associated antigen 5 [Source:MGI Symbol;Acc:MGI:1927470]	-	530	734	855	698	566	532	495	25.1091	29.3936	38.515	26.9884	21.5353	22.2049	19.4248
ENSMUSG00000060671	826.376	866.655	912.38	863.898	603.372	679.735	740.821	0.349366	0.000506762	0.00548819	Atp8b2	3	89939481	89963508	-	8561	protein_coding	ATPase, class I, type 8B, member 2 [Source:MGI Symbol;Acc:MGI:1859660]	-	717	939	921	963	631	648	732	25.5877	28.3256	31.2522	28.0482	18.0851	20.3736	21.6381
ENSMUSG00000042182	1335.8	1338.29	1285.85	1314.24	1141.72	938.831	998.894	0.349035	0.000155837	0.00205288	Bend6	1	33852052	33907816	-	3421	protein_coding	BEN domain containing 6 [Source:MGI Symbol;Acc:MGI:2444572]	-	1159	1450	1298	1465	1194	895	987	53.8575	56.955	57.3516	55.5606	44.5601	36.641	37.9905
ENSMUSG00000018340	980.817	840.812	780.625	986.8	696.125	676.588	716.532	0.348621	0.00136185	0.0121857	Anxa6	11	54979108	55033445	-	2930	protein_coding	annexin A6 [Source:MGI Symbol;Acc:MGI:88255]	-	851	911	788	1100	728	645	708	24.598	22.2581	21.6573	25.9495	16.8998	16.4252	16.9511
ENSMUSG00000015879	341.154	320.266	376.444	334.615	226.623	261.194	306.651	0.348238	0.00872907	0.0499228	Fam184b	5	45529705	45639614	-	8598	protein_coding	family with sequence similarity 184, member B [Source:MGI Symbol;Acc:MGI:2442958]	-	296	347	380	373	237	249	303	3.96674	3.93072	4.8421	4.0796	2.55076	2.93984	3.36341
ENSMUSG00000047547	2282.04	2875.01	3024.43	2828.53	2346.55	2054.94	2018.03	0.347366	0.00128311	0.0116371	Cltb	13	54592401	54611344	-	4868	protein_coding	clathrin, light polypeptide (Lcb) [Source:MGI Symbol;Acc:MGI:1921575]	-	1980	3115	3053	3153	2454	1959	1994	77.4948	103.054	113.617	100.716	77.1367	67.5497	64.6439
ENSMUSG00000015599	1425.7	1199.84	1282.88	1340.25	884.5	1021.7	1154.75	0.346445	0.00142998	0.0126632	Ttbk1	17	46442448	46487675	-	14097	protein_coding	tau tubulin kinase 1 [Source:MGI Symbol;Acc:MGI:2147036]	-	1237	1300	1295	1494	925	974	1141	15.4646	13.7376	15.3938	15.2435	9.28729	10.7277	11.8154
ENSMUSG00000001300	837.902	799.279	632.029	854.03	621.54	542.319	650.748	0.346432	0.00486068	0.0324664	Efnb2	8	8617434	8661242	-	6855	protein_coding	ephrin B2 [Source:MGI Symbol;Acc:MGI:105097]	-	727	866	638	952	650	517	643	17.9464	18.0702	14.9752	19.1799	12.8865	11.2439	13.1477
ENSMUSG00000020620	1108.75	899.882	984.697	1037.93	710.468	826.591	816.725	0.345842	0.000956464	0.00918786	Abca8b	11	109932190	109995845	-	7423	protein_coding	ATP-binding cassette, sub-family A (ABC1), member 8b [Source:MGI Symbol;Acc:MGI:1351668]	-	962	975	994	1157	743	788	807	10.4859	8.98332	10.3021	10.2927	6.50428	7.56727	7.28618
ENSMUSG00000021477	1928.21	2699.64	2446.88	2137.77	2072.12	1707.73	1571.71	0.345831	0.0062116	0.0390577	Ctsl	13	64359337	64370890	-	6489	protein_coding	cathepsin L [Source:MGI Symbol;Acc:MGI:88564]	-	1673	2925	2470	2383	2167	1628	1553	70.7322	104.532	99.2947	82.2264	73.5799	60.6397	54.3861
ENSMUSG00000027540	889.766	858.349	999.557	1001.15	740.111	691.273	761.062	0.345814	0.00045887	0.00506225	Ptpn1	2	167932057	167979385	+	5533	protein_coding	protein tyrosine phosphatase, non-receptor type 1 [Source:MGI Symbol;Acc:MGI:97805]	-	772	930	1009	1116	774	659	752	31.5787	32.1558	39.2442	37.2569	25.4271	23.7489	25.4794
ENSMUSG00000033083	289.289	310.113	293.23	252.082	203.674	232.872	227.711	0.345764	0.00800331	0.0468728	Tbc1d4	14	101442360	101609191	-	7676	protein_coding	TBC1 domain family, member 4 [Source:MGI Symbol;Acc:MGI:2429660]	-	251	336	296	281	213	222	225	5.07404	5.74143	5.68958	4.6361	3.45811	3.9538	3.76754
ENSMUSG00000021589	424.137	356.261	375.453	395.617	278.259	325.182	299.567	0.345311	0.00371869	0.0264253	Rhobtb3	13	75869537	75943925	-	5781	protein_coding	Rho-related BTB domain containing 3 [Source:MGI Symbol;Acc:MGI:1920546]	-	368	386	379	441	291	310	296	14.537	12.8889	14.2355	14.2178	9.23206	10.7887	9.6853
ENSMUSG00000028613	2244.01	1784.07	1941.66	1968.22	1486.92	1487.44	1668.87	0.344895	0.000456386	0.00503954	Lrp8	4	107802261	107876840	+	10514	protein_coding	low density lipoprotein receptor-related protein 8, apolipoprotein e receptor [Source:MGI Symbol;Acc:MGI:1340044]	-	1947	1933	1960	2194	1555	1418	1649	47.5449	39.8998	45.5095	43.7261	30.4963	30.5067	33.3544
[truncated: 319 more rows]
