# Supplementary material for: Homeostatic plasticity in the retina is associated with maintenance of night vision during retinal degenerative disease
Source: eLife. 2020 Sep 22;9:e59422. doi: 10.7554/eLife.59422 (PMC7529457; doi:10.7554/eLife.59422)
Supplement: Supplementary file 13. [file elife-59422-supp13.xlsx]

## Sheet: P23HvsWT_down_GOenrich_signific
Category	GOID	Description	GeneRatio	BgRatio	pvalue	padj	geneID	geneName	Count
BP	GO:0050953	sensory perception of light stimulus	50|1223	140|16518	5.07764e-22	2.00441e-18	ENSMUSG00000023978/ENSMUSG00000029410/ENSMUSG00000021123/ENSMUSG00000071648/ENSMUSG00000031789/ENSMUSG00000030324/ENSMUSG00000056043/ENSMUSG00000029491/ENSMUSG00000031142/ENSMUSG00000024575/ENSMUSG00000025386/ENSMUSG00000041578/ENSMUSG00000067220/ENSMUSG00000042282/ENSMUSG00000034837/ENSMUSG00000031293/ENSMUSG00000020890/ENSMUSG00000034452/ENSMUSG00000053773/ENSMUSG00000035504/ENSMUSG00000025900/…	Prph2/Ppef2/Rdh12/Rom1/Cngb1/Rho/Rgs9bp/Pde6b/Cacna1f/Pde6a/Pde6g/Crx/Cnga1/Gucy2f/Gnat1/Rs1/Gucy2e/Slc24a1/Rdh8/Reep6/Rp1/Unc119/Cacnb2/Grk1/Rp1l1/Whrn/Abca4/Guca1b/Pcare/Tulp1/Cabp4/Rbp3/Guca1a/Bbs2/Rpgrip1/Rcvrn/Cacna2d4/Bbs1/Nxnl2/Vax2/Lrit3/Prcd/Pdc/Atp8a2/Rorb/Rgs9/Aipl1/Ush2a/Ccdc66/Pdcl	50
BP	GO:0007601	visual perception	49|1223	136|16518	8.46456e-22	2.00441e-18	ENSMUSG00000023978/ENSMUSG00000029410/ENSMUSG00000021123/ENSMUSG00000071648/ENSMUSG00000031789/ENSMUSG00000030324/ENSMUSG00000056043/ENSMUSG00000029491/ENSMUSG00000031142/ENSMUSG00000024575/ENSMUSG00000025386/ENSMUSG00000041578/ENSMUSG00000067220/ENSMUSG00000042282/ENSMUSG00000034837/ENSMUSG00000031293/ENSMUSG00000020890/ENSMUSG00000034452/ENSMUSG00000053773/ENSMUSG00000035504/ENSMUSG00000025900/…	Prph2/Ppef2/Rdh12/Rom1/Cngb1/Rho/Rgs9bp/Pde6b/Cacna1f/Pde6a/Pde6g/Crx/Cnga1/Gucy2f/Gnat1/Rs1/Gucy2e/Slc24a1/Rdh8/Reep6/Rp1/Unc119/Cacnb2/Grk1/Rp1l1/Abca4/Guca1b/Pcare/Tulp1/Cabp4/Rbp3/Guca1a/Bbs2/Rpgrip1/Rcvrn/Cacna2d4/Bbs1/Nxnl2/Vax2/Lrit3/Prcd/Pdc/Atp8a2/Rorb/Rgs9/Aipl1/Ush2a/Ccdc66/Pdcl	49
CC	GO:0044441	ciliary part	86|1237	393|16707	2.47977e-20	1.53498e-17	ENSMUSG00000023978/ENSMUSG00000071648/ENSMUSG00000031789/ENSMUSG00000044768/ENSMUSG00000030324/ENSMUSG00000030276/ENSMUSG00000056043/ENSMUSG00000029491/ENSMUSG00000031142/ENSMUSG00000030323/ENSMUSG00000021803/ENSMUSG00000067220/ENSMUSG00000037325/ENSMUSG00000034837/ENSMUSG00000043987/ENSMUSG00000025900/ENSMUSG00000022911/ENSMUSG00000046049/ENSMUSG00000039137/ENSMUSG00000028125/ENSMUSG00000029064/…	Prph2/Rom1/Cngb1/D1Ertd622e/Rho/Ttll3/Rgs9bp/Pde6b/Cacna1f/Ift122/Cdhr1/Cnga1/Bbs7/Gnat1/Cep164/Rp1/Arl13b/Rp1l1/Whrn/Abca4/Gnb1/Bbs9/Wdr60/Guca1b/Pcare/Tulp1/Ttc8/Guca1a/Bbs2/Ldha/Rpgrip1/Mok/Aldoa/Mns1/Bbs1/Wdr78/Cc2d2a/Crocc/Drc3/Tctn1/Cep41/Prcd/Cep126/Ift81/Prom1/Pdc/Poc1b/Dnah9/Saxo2/Bbof1/Atp8a2/Arl3/Cep89/Myrip/Ick/Mak/Cfap69/Ceacam1/Ddx6/Cep290/Ush2a/Rab28/Ift88/Mks1/Ofd1/Tmem67/Nek4/Bbs…	86
BP	GO:0044782	cilium organization	70|1223	304|16518	5.14766e-18	8.12645e-15	ENSMUSG00000044768/ENSMUSG00000030276/ENSMUSG00000030323/ENSMUSG00000037325/ENSMUSG00000043987/ENSMUSG00000038241/ENSMUSG00000025900/ENSMUSG00000056215/ENSMUSG00000022911/ENSMUSG00000046049/ENSMUSG00000035919/ENSMUSG00000042050/ENSMUSG00000021013/ENSMUSG00000032514/ENSMUSG00000031755/ENSMUSG00000033276/ENSMUSG00000035578/ENSMUSG00000032221/ENSMUSG00000006464/ENSMUSG00000039765/ENSMUSG00000040860/…	D1Ertd622e/Ttll3/Ift122/Bbs7/Cep164/Cep250/Rp1/Lrguk/Arl13b/Rp1l1/Bbs9/Wdr60/Ttc8/Ttc21a/Bbs2/Stk36/Iqcg/Mns1/Bbs1/Cc2d2a/Crocc/Tctn1/Cep41/Cep126/Ift81/Dnaaf5/Poc1b/Cep120/Bbof1/Wdr90/Arl3/Cep89/Cntrob/Ick/Wdr34/Tctn3/Mak/Tmem138/Cep290/Mks1/Ttc30a1/Ulk4/Ccdc103/Ofd1/Tmem67/Trove2/Bbs5/Ttc30b/Syne2/Intu/Ccdc66/Gas8/Lrrc46/Sclt1/Wdr35/Tmem107/Ift43/Ablim1/Tchp/Nme5/Tbc1d32/Traf3ip1/Fam161b/Ccdc11…	70
BP	GO:0060271	cilium assembly	66|1223	282|16518	1.93945e-17	2.2963e-14	ENSMUSG00000044768/ENSMUSG00000030276/ENSMUSG00000030323/ENSMUSG00000037325/ENSMUSG00000043987/ENSMUSG00000038241/ENSMUSG00000025900/ENSMUSG00000056215/ENSMUSG00000022911/ENSMUSG00000046049/ENSMUSG00000035919/ENSMUSG00000042050/ENSMUSG00000021013/ENSMUSG00000031755/ENSMUSG00000033276/ENSMUSG00000035578/ENSMUSG00000032221/ENSMUSG00000006464/ENSMUSG00000039765/ENSMUSG00000040860/ENSMUSG00000038593/…	D1Ertd622e/Ttll3/Ift122/Bbs7/Cep164/Cep250/Rp1/Lrguk/Arl13b/Rp1l1/Bbs9/Wdr60/Ttc8/Bbs2/Stk36/Iqcg/Mns1/Bbs1/Cc2d2a/Crocc/Tctn1/Cep41/Cep126/Ift81/Dnaaf5/Poc1b/Cep120/Bbof1/Wdr90/Arl3/Cep89/Cntrob/Ick/Wdr34/Tctn3/Mak/Tmem138/Cep290/Mks1/Ulk4/Ccdc103/Ofd1/Tmem67/Trove2/Bbs5/Syne2/Intu/Ccdc66/Gas8/Lrrc46/Sclt1/Wdr35/Tmem107/Ift43/Ablim1/Tchp/Nme5/Tbc1d32/Traf3ip1/Ccdc113/Tapt1/2700049A03Rik/Arl13a/C…	66
CC	GO:0097733	photoreceptor cell cilium	35|1237	92|16707	8.13126e-17	2.5017e-14	ENSMUSG00000023978/ENSMUSG00000071648/ENSMUSG00000031789/ENSMUSG00000030324/ENSMUSG00000056043/ENSMUSG00000029491/ENSMUSG00000031142/ENSMUSG00000030323/ENSMUSG00000021803/ENSMUSG00000067220/ENSMUSG00000037325/ENSMUSG00000034837/ENSMUSG00000025900/ENSMUSG00000046049/ENSMUSG00000039137/ENSMUSG00000028125/ENSMUSG00000029064/ENSMUSG00000023979/ENSMUSG00000044375/ENSMUSG00000037446/ENSMUSG00000021013/…	Prph2/Rom1/Cngb1/Rho/Rgs9bp/Pde6b/Cacna1f/Ift122/Cdhr1/Cnga1/Bbs7/Gnat1/Rp1/Rp1l1/Whrn/Abca4/Gnb1/Guca1b/Pcare/Tulp1/Ttc8/Guca1a/Rpgrip1/Prcd/Prom1/Pdc/Atp8a2/Arl3/Myrip/Mak/Cep290/Ush2a/Ccdc66/Lyar/Nphp4	35
CC	GO:0097731	9+0 non-motile cilium	35|1237	93|16707	1.21246e-16	2.5017e-14	ENSMUSG00000023978/ENSMUSG00000071648/ENSMUSG00000031789/ENSMUSG00000030324/ENSMUSG00000056043/ENSMUSG00000029491/ENSMUSG00000031142/ENSMUSG00000030323/ENSMUSG00000021803/ENSMUSG00000067220/ENSMUSG00000037325/ENSMUSG00000034837/ENSMUSG00000025900/ENSMUSG00000046049/ENSMUSG00000039137/ENSMUSG00000028125/ENSMUSG00000029064/ENSMUSG00000023979/ENSMUSG00000044375/ENSMUSG00000037446/ENSMUSG00000021013/…	Prph2/Rom1/Cngb1/Rho/Rgs9bp/Pde6b/Cacna1f/Ift122/Cdhr1/Cnga1/Bbs7/Gnat1/Rp1/Rp1l1/Whrn/Abca4/Gnb1/Guca1b/Pcare/Tulp1/Ttc8/Guca1a/Rpgrip1/Prcd/Prom1/Pdc/Atp8a2/Arl3/Myrip/Mak/Cep290/Ush2a/Ccdc66/Lyar/Nphp4	35
CC	GO:0097730	non-motile cilium	40|1237	124|16707	4.14118e-16	6.40848e-14	ENSMUSG00000023978/ENSMUSG00000071648/ENSMUSG00000031789/ENSMUSG00000030324/ENSMUSG00000020212/ENSMUSG00000056043/ENSMUSG00000029491/ENSMUSG00000031142/ENSMUSG00000038115/ENSMUSG00000030323/ENSMUSG00000021803/ENSMUSG00000067220/ENSMUSG00000037325/ENSMUSG00000034837/ENSMUSG00000025900/ENSMUSG00000022911/ENSMUSG00000046049/ENSMUSG00000039137/ENSMUSG00000028125/ENSMUSG00000029064/ENSMUSG00000023979/…	Prph2/Rom1/Cngb1/Rho/Mdm1/Rgs9bp/Pde6b/Cacna1f/Ano2/Ift122/Cdhr1/Cnga1/Bbs7/Gnat1/Rp1/Arl13b/Rp1l1/Whrn/Abca4/Gnb1/Guca1b/Pcare/Tulp1/Ttc8/Guca1a/Rpgrip1/Prcd/Prom1/Pdc/Atp8a2/Arl3/Cep89/Myrip/Mak/Cep290/Ush2a/Ccdc66/Lyar/Arl13a/Nphp4	40
CC	GO:0001750	photoreceptor outer segment	28|1237	69|16707	1.42931e-14	1.76949e-12	ENSMUSG00000023978/ENSMUSG00000071648/ENSMUSG00000031789/ENSMUSG00000030324/ENSMUSG00000056043/ENSMUSG00000029491/ENSMUSG00000031142/ENSMUSG00000021803/ENSMUSG00000067220/ENSMUSG00000037325/ENSMUSG00000034837/ENSMUSG00000025900/ENSMUSG00000046049/ENSMUSG00000028125/ENSMUSG00000029064/ENSMUSG00000023979/ENSMUSG00000044375/ENSMUSG00000037446/ENSMUSG00000023982/ENSMUSG00000075410/ENSMUSG00000029086/…	Prph2/Rom1/Cngb1/Rho/Rgs9bp/Pde6b/Cacna1f/Cdhr1/Cnga1/Bbs7/Gnat1/Rp1/Rp1l1/Abca4/Gnb1/Guca1b/Pcare/Tulp1/Guca1a/Prcd/Prom1/Pdc/Atp8a2/Myrip/Mak/Cep290/Ccdc66/Lyar	28
BP	GO:0001895	retina homeostasis	24|1223	48|16518	3.39603e-15	3.21672e-12	ENSMUSG00000031789/ENSMUSG00000030324/ENSMUSG00000020212/ENSMUSG00000034829/ENSMUSG00000021803/ENSMUSG00000025900/ENSMUSG00000021255/ENSMUSG00000046049/ENSMUSG00000039137/ENSMUSG00000028125/ENSMUSG00000037446/ENSMUSG00000031755/ENSMUSG00000031028/ENSMUSG00000006464/ENSMUSG00000021396/ENSMUSG00000040860/ENSMUSG00000029086/ENSMUSG00000019952/ENSMUSG00000040554/ENSMUSG00000021363/ENSMUSG00000019971/…	Cngb1/Rho/Mdm1/Nxnl1/Cdhr1/Rp1/Esrrb/Rp1l1/Whrn/Abca4/Tulp1/Bbs2/Tub/Bbs1/Nxnl2/Crocc/Prom1/Poc1b/Aipl1/Mak/Cep290/Ush2a/Ccdc66/Nphp4	24
BP	GO:0009583	detection of light stimulus	22|1223	46|16518	1.57548e-13	1.24358e-10	ENSMUSG00000031789/ENSMUSG00000030324/ENSMUSG00000056043/ENSMUSG00000029491/ENSMUSG00000031142/ENSMUSG00000042282/ENSMUSG00000034837/ENSMUSG00000031293/ENSMUSG00000035504/ENSMUSG00000031450/ENSMUSG00000029064/ENSMUSG00000023979/ENSMUSG00000044375/ENSMUSG00000037446/ENSMUSG00000024842/ENSMUSG00000023982/ENSMUSG00000020907/ENSMUSG00000041460/ENSMUSG00000021983/ENSMUSG00000040554/ENSMUSG00000046753/…	Cngb1/Rho/Rgs9bp/Pde6b/Cacna1f/Gucy2f/Gnat1/Rs1/Reep6/Grk1/Gnb1/Guca1b/Pcare/Tulp1/Cabp4/Guca1a/Rcvrn/Cacna2d4/Atp8a2/Aipl1/Ccdc66/Rdh11	22
BP	GO:0120031	plasma membrane bounded cell projection assembly	80|1223	458|16518	3.44591e-13	2.20792e-10	ENSMUSG00000004655/ENSMUSG00000044768/ENSMUSG00000030276/ENSMUSG00000030323/ENSMUSG00000037325/ENSMUSG00000043987/ENSMUSG00000038241/ENSMUSG00000032702/ENSMUSG00000025900/ENSMUSG00000056215/ENSMUSG00000022911/ENSMUSG00000046049/ENSMUSG00000035919/ENSMUSG00000042050/ENSMUSG00000021013/ENSMUSG00000031755/ENSMUSG00000033276/ENSMUSG00000035578/ENSMUSG00000032221/ENSMUSG00000006464/ENSMUSG00000039765/…	Aqp1/D1Ertd622e/Ttll3/Ift122/Bbs7/Cep164/Cep250/Kank1/Rp1/Lrguk/Arl13b/Rp1l1/Bbs9/Wdr60/Ttc8/Bbs2/Stk36/Iqcg/Mns1/Bbs1/Cc2d2a/Crocc/Tctn1/Cep41/Sh3yl1/Nup85/Zmynd8/Cep126/Ift81/Dnaaf5/Poc1b/Cep120/Bbof1/Wdr90/Arl3/Cep89/Wasf3/Cntrob/Eps8/Ick/Wdr34/Tctn3/Mak/Tmem138/Cep290/Arhgap24/Mks1/Ulk4/Ccdc103/Ofd1/Tmem67/Trove2/Hdac4/Bbs5/Syne2/Intu/Ccdc66/Gas8/Lrrc46/Sclt1/Wdr35/Arhgef26/Tmem107/Ift43/Abli…	80
BP	GO:0045494	photoreceptor cell maintenance	20|1223	39|16518	3.72959e-13	2.20792e-10	ENSMUSG00000031789/ENSMUSG00000030324/ENSMUSG00000020212/ENSMUSG00000034829/ENSMUSG00000021803/ENSMUSG00000025900/ENSMUSG00000021255/ENSMUSG00000046049/ENSMUSG00000028125/ENSMUSG00000037446/ENSMUSG00000031755/ENSMUSG00000031028/ENSMUSG00000006464/ENSMUSG00000021396/ENSMUSG00000040860/ENSMUSG00000029086/ENSMUSG00000021363/ENSMUSG00000019971/ENSMUSG00000026609/ENSMUSG00000039577	Cngb1/Rho/Mdm1/Nxnl1/Cdhr1/Rp1/Esrrb/Rp1l1/Abca4/Tulp1/Bbs2/Tub/Bbs1/Nxnl2/Crocc/Prom1/Mak/Cep290/Ush2a/Nphp4	20
BP	GO:0030031	cell projection assembly	80|1223	468|16518	1.11147e-12	5.84882e-10	ENSMUSG00000004655/ENSMUSG00000044768/ENSMUSG00000030276/ENSMUSG00000030323/ENSMUSG00000037325/ENSMUSG00000043987/ENSMUSG00000038241/ENSMUSG00000032702/ENSMUSG00000025900/ENSMUSG00000056215/ENSMUSG00000022911/ENSMUSG00000046049/ENSMUSG00000035919/ENSMUSG00000042050/ENSMUSG00000021013/ENSMUSG00000031755/ENSMUSG00000033276/ENSMUSG00000035578/ENSMUSG00000032221/ENSMUSG00000006464/ENSMUSG00000039765/…	Aqp1/D1Ertd622e/Ttll3/Ift122/Bbs7/Cep164/Cep250/Kank1/Rp1/Lrguk/Arl13b/Rp1l1/Bbs9/Wdr60/Ttc8/Bbs2/Stk36/Iqcg/Mns1/Bbs1/Cc2d2a/Crocc/Tctn1/Cep41/Sh3yl1/Nup85/Zmynd8/Cep126/Ift81/Dnaaf5/Poc1b/Cep120/Bbof1/Wdr90/Arl3/Cep89/Wasf3/Cntrob/Eps8/Ick/Wdr34/Tctn3/Mak/Tmem138/Cep290/Arhgap24/Mks1/Ulk4/Ccdc103/Ofd1/Tmem67/Trove2/Hdac4/Bbs5/Syne2/Intu/Ccdc66/Gas8/Lrrc46/Sclt1/Wdr35/Arhgef26/Tmem107/Ift43/Abli…	80
BP	GO:0046530	photoreceptor cell differentiation	25|1223	65|16518	1.56751e-12	7.42373e-10	ENSMUSG00000040632/ENSMUSG00000071648/ENSMUSG00000031789/ENSMUSG00000032292/ENSMUSG00000041578/ENSMUSG00000021803/ENSMUSG00000025380/ENSMUSG00000034837/ENSMUSG00000025900/ENSMUSG00000046049/ENSMUSG00000044375/ENSMUSG00000037446/ENSMUSG00000024842/ENSMUSG00000021013/ENSMUSG00000057132/ENSMUSG00000028977/ENSMUSG00000006464/ENSMUSG00000029086/ENSMUSG00000063681/ENSMUSG00000036192/ENSMUSG00000025035/…	Nrl/Rom1/Cngb1/Nr2e3/Crx/Cdhr1/Fscn2/Gnat1/Rp1/Rp1l1/Pcare/Tulp1/Cabp4/Ttc8/Rpgrip1/Casz1/Bbs1/Prom1/Crb1/Rorb/Arl3/Cep290/Hcn1/Ccdc66/Nphp4	25
BP	GO:0061512	protein localization to cilium	20|1223	44|16518	6.65569e-12	2.86558e-09	ENSMUSG00000030323/ENSMUSG00000022911/ENSMUSG00000035919/ENSMUSG00000044375/ENSMUSG00000037446/ENSMUSG00000032514/ENSMUSG00000031755/ENSMUSG00000025245/ENSMUSG00000031028/ENSMUSG00000006464/ENSMUSG00000039765/ENSMUSG00000040860/ENSMUSG00000038593/ENSMUSG00000046753/ENSMUSG00000040220/ENSMUSG00000066643/ENSMUSG00000020895/ENSMUSG00000038122/ENSMUSG00000052549/ENSMUSG00000084957	Ift122/Arl13b/Bbs9/Pcare/Tulp1/Ttc21a/Bbs2/Lztfl1/Tub/Bbs1/Cc2d2a/Crocc/Tctn1/Ccdc66/Gas8/Wdr35/Tmem107/Tbc1d32/Arl13a/Bbip1	20
CC	GO:0005813	centrosome	80|1237	498|16707	2.91316e-11	3.00542e-09	ENSMUSG00000020212/ENSMUSG00000038070/ENSMUSG00000037325/ENSMUSG00000041609/ENSMUSG00000032902/ENSMUSG00000043987/ENSMUSG00000038241/ENSMUSG00000002058/ENSMUSG00000021671/ENSMUSG00000071103/ENSMUSG00000017146/ENSMUSG00000035919/ENSMUSG00000042050/ENSMUSG00000044700/ENSMUSG00000025437/ENSMUSG00000021013/ENSMUSG00000039158/ENSMUSG00000024795/ENSMUSG00000050930/ENSMUSG00000027475/ENSMUSG00000006464/…	Mdm1/Cntln/Bbs7/Bicdl1/Slc16a1/Cep164/Cep250/Unc119/Poc5/1700029J07Rik/Brca1/Bbs9/Wdr60/Tmem201/Usp33/Ttc8/Akna/Kif20b/Map10/Kif3b/Bbs1/Kifc3/Ric8b/Crocc/Hspa1b/Cep41/Hspa1a/Cep126/Ift81/Itsn2/Poc1b/Cep120/Arl3/Cep89/Hook1/Ndrg1/Haus1/Ccdc14/Cntrob/Xrcc2/Zfp322a/Mak/Cdk5rap2/Cep85/Cep290/Cep63/Ift88/Mks1/Hnrnpu/Ttc30a1/Clasp1/Ofd1/Tmem67/Bbs5/Syne2/Ranbp3/Spice1/Pde4dip/Cspp1/Clip1/Ccdc66/Gpsm2/P…	80
CC	GO:0001917	photoreceptor inner segment	20|1237	50|16707	1.15988e-10	1.02567e-08	ENSMUSG00000030324/ENSMUSG00000034837/ENSMUSG00000035504/ENSMUSG00000025900/ENSMUSG00000039137/ENSMUSG00000029064/ENSMUSG00000023979/ENSMUSG00000044375/ENSMUSG00000037446/ENSMUSG00000023982/ENSMUSG00000040860/ENSMUSG00000006007/ENSMUSG00000063681/ENSMUSG00000040554/ENSMUSG00000021363/ENSMUSG00000026609/ENSMUSG00000046753/ENSMUSG00000000579/ENSMUSG00000034601/ENSMUSG00000066441	Rho/Gnat1/Reep6/Rp1/Whrn/Gnb1/Guca1b/Pcare/Tulp1/Guca1a/Crocc/Pdc/Crb1/Aipl1/Mak/Ush2a/Ccdc66/Dynlt1c/2700049A03Rik/Rdh11	20
BP	GO:0042461	photoreceptor cell development	20|1223	47|16518	2.9752e-11	1.17421e-08	ENSMUSG00000040632/ENSMUSG00000031789/ENSMUSG00000032292/ENSMUSG00000021803/ENSMUSG00000025380/ENSMUSG00000034837/ENSMUSG00000025900/ENSMUSG00000046049/ENSMUSG00000044375/ENSMUSG00000037446/ENSMUSG00000024842/ENSMUSG00000057132/ENSMUSG00000006464/ENSMUSG00000063681/ENSMUSG00000036192/ENSMUSG00000025035/ENSMUSG00000019971/ENSMUSG00000021730/ENSMUSG00000046753/ENSMUSG00000039577	Nrl/Cngb1/Nr2e3/Cdhr1/Fscn2/Gnat1/Rp1/Rp1l1/Pcare/Tulp1/Cabp4/Rpgrip1/Bbs1/Crb1/Rorb/Arl3/Cep290/Hcn1/Ccdc66/Nphp4	20
CC	GO:0036064	ciliary basal body	32|1237	123|16707	2.11518e-10	1.63662e-08	ENSMUSG00000030323/ENSMUSG00000037325/ENSMUSG00000039137/ENSMUSG00000035919/ENSMUSG00000021013/ENSMUSG00000031755/ENSMUSG00000006464/ENSMUSG00000029790/ENSMUSG00000029469/ENSMUSG00000019952/ENSMUSG00000038570/ENSMUSG00000057265/ENSMUSG00000025035/ENSMUSG00000009828/ENSMUSG00000019971/ENSMUSG00000026609/ENSMUSG00000029128/ENSMUSG00000040040/ENSMUSG00000034121/ENSMUSG00000040586/ENSMUSG00000021918/…	Ift122/Bbs7/Whrn/Bbs9/Ttc8/Bbs2/Bbs1/Cep41/Ift81/Poc1b/Saxo2/Bbof1/Arl3/Ick/Cep290/Ush2a/Rab28/Ift88/Mks1/Ofd1/Nek4/Bbs5/Ttc30b/Intu/Ccdc66/Gas8/Wdr35/Traf3ip1/Tapt1/2700049A03Rik/Nphp4/Armc9	32
BP	GO:0009584	detection of visible light	17|1223	36|16518	1.20566e-10	4.39231e-08	ENSMUSG00000031789/ENSMUSG00000030324/ENSMUSG00000056043/ENSMUSG00000031142/ENSMUSG00000042282/ENSMUSG00000034837/ENSMUSG00000031293/ENSMUSG00000035504/ENSMUSG00000031450/ENSMUSG00000029064/ENSMUSG00000044375/ENSMUSG00000037446/ENSMUSG00000041460/ENSMUSG00000021983/ENSMUSG00000040554/ENSMUSG00000046753/ENSMUSG00000066441	Cngb1/Rho/Rgs9bp/Cacna1f/Gucy2f/Gnat1/Rs1/Reep6/Grk1/Gnb1/Pcare/Tulp1/Cacna2d4/Atp8a2/Aipl1/Ccdc66/Rdh11	17
CC	GO:0035869	ciliary transition zone	21|1237	62|16707	1.49441e-09	1.02782e-07	ENSMUSG00000044768/ENSMUSG00000030323/ENSMUSG00000034837/ENSMUSG00000025900/ENSMUSG00000046049/ENSMUSG00000039137/ENSMUSG00000035919/ENSMUSG00000021013/ENSMUSG00000057132/ENSMUSG00000039765/ENSMUSG00000038593/ENSMUSG00000025035/ENSMUSG00000021363/ENSMUSG00000019971/ENSMUSG00000026609/ENSMUSG00000034121/ENSMUSG00000049488/ENSMUSG00000021918/ENSMUSG00000020895/ENSMUSG00000034292/ENSMUSG00000039577	D1Ertd622e/Ift122/Gnat1/Rp1/Rp1l1/Whrn/Bbs9/Ttc8/Rpgrip1/Cc2d2a/Tctn1/Arl3/Mak/Cep290/Ush2a/Mks1/Tmem67/Nek4/Tmem107/Traf3ip1/Nphp4	21
CC	GO:0044450	microtubule organizing center part	36|1237	165|16707	3.10361e-09	1.92113e-07	ENSMUSG00000020212/ENSMUSG00000038070/ENSMUSG00000043987/ENSMUSG00000038241/ENSMUSG00000021671/ENSMUSG00000035919/ENSMUSG00000042050/ENSMUSG00000021013/ENSMUSG00000006464/ENSMUSG00000040860/ENSMUSG00000029790/ENSMUSG00000091971/ENSMUSG00000019952/ENSMUSG00000048799/ENSMUSG00000038570/ENSMUSG00000073434/ENSMUSG00000023072/ENSMUSG00000022833/ENSMUSG00000032782/ENSMUSG00000039298/ENSMUSG00000037443/…	Mdm1/Cntln/Cep164/Cep250/Poc5/Bbs9/Wdr60/Ttc8/Bbs1/Crocc/Cep41/Hspa1a/Poc1b/Cep120/Saxo2/Wdr90/Cep89/Ccdc14/Cntrob/Cdk5rap2/Cep85/Cep290/Cep63/Ift88/Mks1/Clasp1/Ofd1/Bbs5/Spice1/Ccdc66/Sclt1/Cep152/Aurka/Ccdc113/Fgfr1op/2700049A03Rik	36
BP	GO:0001754	eye photoreceptor cell differentiation	17|1223	46|16518	1.20406e-08	4.07317e-06	ENSMUSG00000040632/ENSMUSG00000071648/ENSMUSG00000032292/ENSMUSG00000025380/ENSMUSG00000034837/ENSMUSG00000025900/ENSMUSG00000037446/ENSMUSG00000024842/ENSMUSG00000021013/ENSMUSG00000057132/ENSMUSG00000028977/ENSMUSG00000029086/ENSMUSG00000063681/ENSMUSG00000036192/ENSMUSG00000019971/ENSMUSG00000021730/ENSMUSG00000046753	Nrl/Rom1/Nr2e3/Fscn2/Gnat1/Rp1/Tulp1/Cabp4/Ttc8/Rpgrip1/Casz1/Prom1/Crb1/Rorb/Cep290/Hcn1/Ccdc66	17
BP	GO:0050908	detection of light stimulus involved in visual perception	11|1223	19|16518	1.5232e-08	4.50868e-06	ENSMUSG00000031789/ENSMUSG00000056043/ENSMUSG00000031142/ENSMUSG00000042282/ENSMUSG00000034837/ENSMUSG00000035504/ENSMUSG00000044375/ENSMUSG00000037446/ENSMUSG00000041460/ENSMUSG00000021983/ENSMUSG00000046753	Cngb1/Rgs9bp/Cacna1f/Gucy2f/Gnat1/Reep6/Pcare/Tulp1/Cacna2d4/Atp8a2/Ccdc66	11
BP	GO:0050962	detection of light stimulus involved in sensory perception	11|1223	19|16518	1.5232e-08	4.50868e-06	ENSMUSG00000031789/ENSMUSG00000056043/ENSMUSG00000031142/ENSMUSG00000042282/ENSMUSG00000034837/ENSMUSG00000035504/ENSMUSG00000044375/ENSMUSG00000037446/ENSMUSG00000041460/ENSMUSG00000021983/ENSMUSG00000046753	Cngb1/Rgs9bp/Cacna1f/Gucy2f/Gnat1/Reep6/Pcare/Tulp1/Cacna2d4/Atp8a2/Ccdc66	11
CC	GO:0005814	centriole	26|1237	119|16707	4.56176e-07	2.56703e-05	ENSMUSG00000020212/ENSMUSG00000038070/ENSMUSG00000043987/ENSMUSG00000038241/ENSMUSG00000021671/ENSMUSG00000021013/ENSMUSG00000040860/ENSMUSG00000029790/ENSMUSG00000091971/ENSMUSG00000019952/ENSMUSG00000048799/ENSMUSG00000038570/ENSMUSG00000073434/ENSMUSG00000023072/ENSMUSG00000032782/ENSMUSG00000019971/ENSMUSG00000032534/ENSMUSG00000040040/ENSMUSG00000034121/ENSMUSG00000040586/ENSMUSG00000043065/…	Mdm1/Cntln/Cep164/Cep250/Poc5/Ttc8/Crocc/Cep41/Hspa1a/Poc1b/Cep120/Saxo2/Wdr90/Cep89/Cntrob/Cep290/Cep63/Ift88/Mks1/Ofd1/Spice1/Sclt1/Cep152/Aurka/Fgfr1op/2700049A03Rik	26
BP	GO:1905515	non-motile cilium assembly	18|1223	60|16518	1.83226e-07	5.10447e-05	ENSMUSG00000030323/ENSMUSG00000037325/ENSMUSG00000038241/ENSMUSG00000025900/ENSMUSG00000022911/ENSMUSG00000021013/ENSMUSG00000031755/ENSMUSG00000006464/ENSMUSG00000039765/ENSMUSG00000040729/ENSMUSG00000023072/ENSMUSG00000021363/ENSMUSG00000019971/ENSMUSG00000034121/ENSMUSG00000060798/ENSMUSG00000020895/ENSMUSG00000038122/ENSMUSG00000052549	Ift122/Bbs7/Cep250/Rp1/Arl13b/Ttc8/Bbs2/Bbs1/Cc2d2a/Cep126/Cep89/Mak/Cep290/Mks1/Intu/Tmem107/Tbc1d32/Arl13a	18
CC	GO:0060170	ciliary membrane	16|1237	54|16707	1.05773e-06	5.45611e-05	ENSMUSG00000071648/ENSMUSG00000030324/ENSMUSG00000021803/ENSMUSG00000067220/ENSMUSG00000037325/ENSMUSG00000022911/ENSMUSG00000029064/ENSMUSG00000035919/ENSMUSG00000021013/ENSMUSG00000031755/ENSMUSG00000006464/ENSMUSG00000029086/ENSMUSG00000074272/ENSMUSG00000049488/ENSMUSG00000063145/ENSMUSG00000052549	Rom1/Rho/Cdhr1/Cnga1/Bbs7/Arl13b/Gnb1/Bbs9/Ttc8/Bbs2/Bbs1/Prom1/Ceacam1/Tmem67/Bbs5/Arl13a	16
BP	GO:0007602	phototransduction	12|1223	28|16518	2.56596e-07	6.6368e-05	ENSMUSG00000031789/ENSMUSG00000030324/ENSMUSG00000034837/ENSMUSG00000031293/ENSMUSG00000031450/ENSMUSG00000029064/ENSMUSG00000023979/ENSMUSG00000024842/ENSMUSG00000023982/ENSMUSG00000020907/ENSMUSG00000040554/ENSMUSG00000066441	Cngb1/Rho/Gnat1/Rs1/Grk1/Gnb1/Guca1b/Cabp4/Guca1a/Rcvrn/Aipl1/Rdh11	12
BP	GO:0042462	eye photoreceptor cell development	13|1223	33|16518	2.66257e-07	6.6368e-05	ENSMUSG00000040632/ENSMUSG00000032292/ENSMUSG00000025380/ENSMUSG00000034837/ENSMUSG00000025900/ENSMUSG00000037446/ENSMUSG00000024842/ENSMUSG00000057132/ENSMUSG00000063681/ENSMUSG00000036192/ENSMUSG00000019971/ENSMUSG00000021730/ENSMUSG00000046753	Nrl/Nr2e3/Fscn2/Gnat1/Rp1/Tulp1/Cabp4/Rpgrip1/Crb1/Rorb/Cep290/Hcn1/Ccdc66	13
CC	GO:0098687	chromosomal region	43|1237	276|16707	2.61267e-06	0.000121285	ENSMUSG00000027331/ENSMUSG00000034274/ENSMUSG00000005233/ENSMUSG00000029910/ENSMUSG00000028397/ENSMUSG00000020739/ENSMUSG00000024943/ENSMUSG00000017843/ENSMUSG00000024660/ENSMUSG00000059851/ENSMUSG00000030528/ENSMUSG00000029177/ENSMUSG00000017421/ENSMUSG00000027323/ENSMUSG00000020628/ENSMUSG00000036928/ENSMUSG00000020290/ENSMUSG00000039630/ENSMUSG00000027115/ENSMUSG00000038025/ENSMUSG00000026761/…	Knstrn/Thoc5/Spc25/Mad2l1/Kdm4c/Nup85/Smc5/Ppp2r5c/Incenp/Kmt5c/Blm/Cenpa/Zfp207/Rad51/Trappc12/Stag3/Xpo1/Hnrnpu/Kif18a/Phf2/Orc4/Pold1/Clasp1/Rpa2/Zbtb48/Lrif1/Cbx1/Nsl1/Kmt5b/Zfp276/Wrap53/Dnmt3a/Gm28043/Nup107/Brca2/Aurka/Anapc16/Ctcf/Mre11a/Nuf2/Ncapd3/Ska2/Piwil2	43
CC	GO:0000793	condensed chromosome	35|1237	205|16707	2.74312e-06	0.000121285	ENSMUSG00000027331/ENSMUSG00000005233/ENSMUSG00000021255/ENSMUSG00000017146/ENSMUSG00000034349/ENSMUSG00000029910/ENSMUSG00000054717/ENSMUSG00000020739/ENSMUSG00000024120/ENSMUSG00000024943/ENSMUSG00000024045/ENSMUSG00000024660/ENSMUSG00000059851/ENSMUSG00000030528/ENSMUSG00000029177/ENSMUSG00000017421/ENSMUSG00000027323/ENSMUSG00000036928/ENSMUSG00000039630/ENSMUSG00000038025/ENSMUSG00000038569/…	Knstrn/Spc25/Esrrb/Brca1/Smc4/Mad2l1/Hmgb2/Nup85/Lrpprc/Smc5/Akap8/Incenp/Kmt5c/Blm/Cenpa/Zfp207/Rad51/Stag3/Hnrnpu/Phf2/Rad9b/Nsl1/Kmt5b/Zfp276/Nup107/Ago3/Pes1/Brca2/Aurka/Anapc16/Ctcf/Mre11a/Nuf2/Ncapd3/Ska2	35
BP	GO:0060249	anatomical structure homeostasis	53|1223	353|16518	6.06339e-07	0.000143581	ENSMUSG00000031789/ENSMUSG00000030324/ENSMUSG00000020212/ENSMUSG00000034829/ENSMUSG00000021803/ENSMUSG00000025900/ENSMUSG00000021255/ENSMUSG00000046049/ENSMUSG00000039137/ENSMUSG00000028125/ENSMUSG00000037446/ENSMUSG00000031755/ENSMUSG00000031028/ENSMUSG00000030265/ENSMUSG00000030695/ENSMUSG00000006464/ENSMUSG00000045103/ENSMUSG00000021396/ENSMUSG00000040860/ENSMUSG00000091971/ENSMUSG00000029086/…	Cngb1/Rho/Mdm1/Nxnl1/Cdhr1/Rp1/Esrrb/Rp1l1/Whrn/Abca4/Tulp1/Bbs2/Tub/Kras/Aldoa/Bbs1/Dmd/Nxnl2/Crocc/Hspa1a/Prom1/Poc1b/Smc5/Lrrk1/Gigyf2/Tfrc/Slc17a7/Aipl1/Blm/Mak/Ceacam1/Rad51/Slx1b/Stk11/Cep290/Ush2a/Rad51c/Mks1/Hnrnpu/Naf1/Rpa2/Zbtb48/Pgk1/Ccdc66/Adam8/Wrap53/Cct3/Brca2/Mre11a/Add1/Nphp4/Hsp90aa1/Nat10	53
CC	GO:0032391	photoreceptor connecting cilium	12|1237	36|16707	6.05564e-06	0.000249896	ENSMUSG00000030323/ENSMUSG00000034837/ENSMUSG00000025900/ENSMUSG00000046049/ENSMUSG00000039137/ENSMUSG00000021013/ENSMUSG00000057132/ENSMUSG00000025035/ENSMUSG00000021363/ENSMUSG00000019971/ENSMUSG00000026609/ENSMUSG00000039577	Ift122/Gnat1/Rp1/Rp1l1/Whrn/Ttc8/Rpgrip1/Arl3/Mak/Cep290/Ush2a/Nphp4	12
BP	GO:0060041	retina development in camera-type eye	28|1223	142|16518	1.51488e-06	0.000341642	ENSMUSG00000023978/ENSMUSG00000071648/ENSMUSG00000032292/ENSMUSG00000030324/ENSMUSG00000020212/ENSMUSG00000029491/ENSMUSG00000041578/ENSMUSG00000034837/ENSMUSG00000031293/ENSMUSG00000025900/ENSMUSG00000046049/ENSMUSG00000029064/ENSMUSG00000037446/ENSMUSG00000024842/ENSMUSG00000021013/ENSMUSG00000031028/ENSMUSG00000057132/ENSMUSG00000028977/ENSMUSG00000034777/ENSMUSG00000029086/ENSMUSG00000021983/…	Prph2/Rom1/Nr2e3/Rho/Mdm1/Pde6b/Crx/Gnat1/Rs1/Rp1/Rp1l1/Gnb1/Tulp1/Cabp4/Ttc8/Tub/Rpgrip1/Casz1/Vax2/Prom1/Atp8a2/Rorb/Slc17a7/Cep290/Hcn1/Max/Tbc1d32/Nphp4	28
BP	GO:0009582	detection of abiotic stimulus	23|1223	107|16518	2.78255e-06	0.000599006	ENSMUSG00000031789/ENSMUSG00000030324/ENSMUSG00000056043/ENSMUSG00000029491/ENSMUSG00000031142/ENSMUSG00000042282/ENSMUSG00000030470/ENSMUSG00000034837/ENSMUSG00000031293/ENSMUSG00000035504/ENSMUSG00000031450/ENSMUSG00000029064/ENSMUSG00000023979/ENSMUSG00000044375/ENSMUSG00000037446/ENSMUSG00000024842/ENSMUSG00000023982/ENSMUSG00000020907/ENSMUSG00000041460/ENSMUSG00000021983/ENSMUSG00000040554/…	Cngb1/Rho/Rgs9bp/Pde6b/Cacna1f/Gucy2f/Csrp3/Gnat1/Rs1/Reep6/Grk1/Gnb1/Guca1b/Pcare/Tulp1/Cabp4/Guca1a/Rcvrn/Cacna2d4/Atp8a2/Aipl1/Ccdc66/Rdh11	23
BP	GO:0009581	detection of external stimulus	23|1223	108|16518	3.2913e-06	0.000677721	ENSMUSG00000031789/ENSMUSG00000030324/ENSMUSG00000056043/ENSMUSG00000029491/ENSMUSG00000031142/ENSMUSG00000042282/ENSMUSG00000030470/ENSMUSG00000034837/ENSMUSG00000031293/ENSMUSG00000035504/ENSMUSG00000031450/ENSMUSG00000029064/ENSMUSG00000023979/ENSMUSG00000044375/ENSMUSG00000037446/ENSMUSG00000024842/ENSMUSG00000023982/ENSMUSG00000020907/ENSMUSG00000041460/ENSMUSG00000021983/ENSMUSG00000040554/…	Cngb1/Rho/Rgs9bp/Pde6b/Cacna1f/Gucy2f/Csrp3/Gnat1/Rs1/Reep6/Grk1/Gnb1/Guca1b/Pcare/Tulp1/Cabp4/Guca1a/Rcvrn/Cacna2d4/Atp8a2/Aipl1/Ccdc66/Rdh11	23
BP	GO:0000724	double-strand break repair via homologous recombination	23|1223	110|16518	4.57115e-06	0.00090204	ENSMUSG00000017146/ENSMUSG00000024943/ENSMUSG00000078773/ENSMUSG00000027353/ENSMUSG00000030528/ENSMUSG00000028933/ENSMUSG00000027323/ENSMUSG00000007646/ENSMUSG00000035266/ENSMUSG00000028820/ENSMUSG00000028884/ENSMUSG00000030243/ENSMUSG00000030346/ENSMUSG00000029283/ENSMUSG00000051238/ENSMUSG00000041346/ENSMUSG00000035455/ENSMUSG00000066440/ENSMUSG00000032705/ENSMUSG00000041147/ENSMUSG00000031928/…	Brca1/Smc5/Rad54b/Mcm8/Blm/Xrcc2/Rad51/Rad51c/Helq/Sfpq/Rpa2/Recql/Rad51ap1/Cdc7/Swsap1/Wrap53/Fignl1/Zfyve26/Exd2/Brca2/Mre11a/Gins4/Nipbl	23
BP	GO:0000725	recombinational repair	23|1223	111|16518	5.36787e-06	0.00101689	ENSMUSG00000017146/ENSMUSG00000024943/ENSMUSG00000078773/ENSMUSG00000027353/ENSMUSG00000030528/ENSMUSG00000028933/ENSMUSG00000027323/ENSMUSG00000007646/ENSMUSG00000035266/ENSMUSG00000028820/ENSMUSG00000028884/ENSMUSG00000030243/ENSMUSG00000030346/ENSMUSG00000029283/ENSMUSG00000051238/ENSMUSG00000041346/ENSMUSG00000035455/ENSMUSG00000066440/ENSMUSG00000032705/ENSMUSG00000041147/ENSMUSG00000031928/…	Brca1/Smc5/Rad54b/Mcm8/Blm/Xrcc2/Rad51/Rad51c/Helq/Sfpq/Rpa2/Recql/Rad51ap1/Cdc7/Swsap1/Wrap53/Fignl1/Zfyve26/Exd2/Brca2/Mre11a/Gins4/Nipbl	23
CC	GO:0005819	spindle	45|1237	322|16707	2.73476e-05	0.00105801	ENSMUSG00000027331/ENSMUSG00000027699/ENSMUSG00000025420/ENSMUSG00000038241/ENSMUSG00000070730/ENSMUSG00000002058/ENSMUSG00000029910/ENSMUSG00000042050/ENSMUSG00000044700/ENSMUSG00000024795/ENSMUSG00000050930/ENSMUSG00000027475/ENSMUSG00000041775/ENSMUSG00000020739/ENSMUSG00000019952/ENSMUSG00000025035/ENSMUSG00000023072/ENSMUSG00000024660/ENSMUSG00000021115/ENSMUSG00000041840/ENSMUSG00000021363/…	Knstrn/Ect2/Katnal2/Cep250/Rmdn3/Unc119/Mad2l1/Wdr60/Tmem201/Kif20b/Map10/Kif3b/Mapk1ip1/Nup85/Poc1b/Arl3/Cep89/Incenp/Vrk1/Haus1/Mak/Zfp207/Mapre3/Cdk5rap2/Cep85/Cep63/Eml1/Hnrnpu/Kif18a/Clasp1/Spice1/Cspp1/Lats1/Cdc7/Cbx1/Gpsm2/Slc25a5/Dido1/Neil2/Aurka/Dynlt1c/Cep95/Ikbkg/Kifc1/Ska2	45
CC	GO:0000775	chromosome, centromeric region	29|1237	176|16707	3.78445e-05	0.00137799	ENSMUSG00000027331/ENSMUSG00000005233/ENSMUSG00000029910/ENSMUSG00000028397/ENSMUSG00000020739/ENSMUSG00000017843/ENSMUSG00000024660/ENSMUSG00000059851/ENSMUSG00000029177/ENSMUSG00000017421/ENSMUSG00000020628/ENSMUSG00000036928/ENSMUSG00000020290/ENSMUSG00000039630/ENSMUSG00000027115/ENSMUSG00000038025/ENSMUSG00000064302/ENSMUSG00000018666/ENSMUSG00000062510/ENSMUSG00000045098/ENSMUSG00000001065/…	Knstrn/Spc25/Mad2l1/Kdm4c/Nup85/Ppp2r5c/Incenp/Kmt5c/Cenpa/Zfp207/Trappc12/Stag3/Xpo1/Hnrnpu/Kif18a/Phf2/Clasp1/Cbx1/Nsl1/Kmt5b/Zfp276/Dnmt3a/Nup107/Aurka/Anapc16/Ctcf/Nuf2/Ncapd3/Ska2	29
BP	GO:0007018	microtubule-based movement	38|1223	242|16518	8.13217e-06	0.00148131	ENSMUSG00000030323/ENSMUSG00000042050/ENSMUSG00000044700/ENSMUSG00000032514/ENSMUSG00000031755/ENSMUSG00000033276/ENSMUSG00000024795/ENSMUSG00000027475/ENSMUSG00000043020/ENSMUSG00000006464/ENSMUSG00000035126/ENSMUSG00000000738/ENSMUSG00000031788/ENSMUSG00000042757/ENSMUSG00000041642/ENSMUSG00000029469/ENSMUSG00000025857/ENSMUSG00000056752/ENSMUSG00000025241/ENSMUSG00000025035/ENSMUSG00000009828/…	Ift122/Wdr60/Tmem201/Ttc21a/Bbs2/Stk36/Kif20b/Kif3b/Wdr63/Bbs1/Wdr78/Spg7/Kifc3/Tmem108/Kif21b/Ift81/Dnaaf5/Dnah9/Fyco1/Arl3/Ick/Mak/Ktn1/Ttc30a1/Kif18a/Ulk4/Ccdc103/Rhot1/Rhot2/Ttc30b/Syne2/Gas8/Wdr35/Ift43/Nme5/Traf3ip1/Ccdc151/Kifc1	38
CC	GO:0031253	cell projection membrane	43|1237	309|16707	4.52952e-05	0.00155765	ENSMUSG00000004655/ENSMUSG00000071648/ENSMUSG00000030324/ENSMUSG00000034320/ENSMUSG00000021803/ENSMUSG00000067220/ENSMUSG00000037325/ENSMUSG00000037936/ENSMUSG00000032702/ENSMUSG00000022911/ENSMUSG00000036083/ENSMUSG00000029064/ENSMUSG00000035919/ENSMUSG00000021013/ENSMUSG00000028413/ENSMUSG00000031755/ENSMUSG00000022114/ENSMUSG00000050556/ENSMUSG00000006464/ENSMUSG00000016664/ENSMUSG00000045103/…	Aqp1/Rom1/Rho/Slc26a2/Cdhr1/Cnga1/Bbs7/Scarb1/Kank1/Arl13b/Slc17a3/Gnb1/Bbs9/Ttc8/B4galt1/Bbs2/Spry2/Kcnb1/Bbs1/Pacsin2/Dmd/Dock8/Kirrel/Sh3yl1/Prom1/Slc46a1/C2cd5/Psd/Eps8/Ceacam1/Ush2a/Dlc1/Lima1/Tmem67/Bbs5/Hcn1/Syne2/Dlg1/Mttp/Inpp5k/Epb41l5/Arl13a/Hsp90aa1	43
BP	GO:0001894	tissue homeostasis	33|1223	199|16518	9.88888e-06	0.00173458	ENSMUSG00000031789/ENSMUSG00000030324/ENSMUSG00000020212/ENSMUSG00000034829/ENSMUSG00000021803/ENSMUSG00000025900/ENSMUSG00000021255/ENSMUSG00000046049/ENSMUSG00000039137/ENSMUSG00000028125/ENSMUSG00000037446/ENSMUSG00000031755/ENSMUSG00000031028/ENSMUSG00000030265/ENSMUSG00000006464/ENSMUSG00000021396/ENSMUSG00000040860/ENSMUSG00000029086/ENSMUSG00000019952/ENSMUSG00000015133/ENSMUSG00000048000/…	Cngb1/Rho/Mdm1/Nxnl1/Cdhr1/Rp1/Esrrb/Rp1l1/Whrn/Abca4/Tulp1/Bbs2/Tub/Kras/Bbs1/Nxnl2/Crocc/Prom1/Poc1b/Lrrk1/Gigyf2/Tfrc/Aipl1/Mak/Ceacam1/Stk11/Cep290/Ush2a/Mks1/Ccdc66/Adam8/Add1/Nphp4	33
BP	GO:0042073	intraciliary transport	12|1223	38|16518	1.13968e-05	0.00192769	ENSMUSG00000030323/ENSMUSG00000032514/ENSMUSG00000006464/ENSMUSG00000029469/ENSMUSG00000025035/ENSMUSG00000009828/ENSMUSG00000021363/ENSMUSG00000075271/ENSMUSG00000075273/ENSMUSG00000066643/ENSMUSG00000007867/ENSMUSG00000034292	Ift122/Ttc21a/Bbs1/Ift81/Arl3/Ick/Mak/Ttc30a1/Ttc30b/Wdr35/Ift43/Traf3ip1	12
BP	GO:0048592	eye morphogenesis	27|1223	150|16518	1.37185e-05	0.00224038	ENSMUSG00000040632/ENSMUSG00000004655/ENSMUSG00000071648/ENSMUSG00000032292/ENSMUSG00000030323/ENSMUSG00000025380/ENSMUSG00000035517/ENSMUSG00000034837/ENSMUSG00000031293/ENSMUSG00000025900/ENSMUSG00000037446/ENSMUSG00000024842/ENSMUSG00000021013/ENSMUSG00000057132/ENSMUSG00000028977/ENSMUSG00000034777/ENSMUSG00000029086/ENSMUSG00000063681/ENSMUSG00000021983/ENSMUSG00000036192/ENSMUSG00000027276/…	Nrl/Aqp1/Rom1/Nr2e3/Ift122/Fscn2/Tdrd7/Gnat1/Rs1/Rp1/Tulp1/Cabp4/Ttc8/Rpgrip1/Casz1/Vax2/Prom1/Crb1/Atp8a2/Rorb/Jag1/Cep290/Hcn1/Cited2/Pou2f1/Ccdc66/Nipbl	27
CC	GO:0005874	microtubule	50|1237	385|16707	7.0721e-05	0.00230402	ENSMUSG00000027331/ENSMUSG00000030276/ENSMUSG00000020212/ENSMUSG00000025420/ENSMUSG00000071647/ENSMUSG00000070730/ENSMUSG00000041308/ENSMUSG00000022114/ENSMUSG00000024795/ENSMUSG00000050930/ENSMUSG00000027475/ENSMUSG00000019845/ENSMUSG00000013155/ENSMUSG00000031788/ENSMUSG00000024120/ENSMUSG00000038570/ENSMUSG00000026933/ENSMUSG00000025035/ENSMUSG00000028572/ENSMUSG00000024660/ENSMUSG00000005125/…	Knstrn/Ttll3/Mdm1/Katnal2/Eml3/Rmdn3/Sntb2/Spry2/Kif20b/Map10/Kif3b/Tube1/Enkd1/Kifc3/Lrpprc/Saxo2/Camsap1/Arl3/Hook1/Incenp/Ndrg1/Haus1/Sarm1/Tmem214/Zfp207/Mapre3/Cdk5rap2/Bin1/Eml1/Svil/Hnrnpu/Kif18a/Wdr47/Clasp1/Pde4dip/Cspp1/Clip1/Dlg1/Ccdc66/Gas8/Trip10/Cct3/Neil2/Aurka/Fam161b/Dynlt1c/Ttll13/Kifc1/Ska2/Ccdc181	50
BP	GO:0009314	response to radiation	55|1223	413|16518	1.5255e-05	0.00240826	ENSMUSG00000004655/ENSMUSG00000031789/ENSMUSG00000030324/ENSMUSG00000056043/ENSMUSG00000029491/ENSMUSG00000031142/ENSMUSG00000042282/ENSMUSG00000027699/ENSMUSG00000034837/ENSMUSG00000031293/ENSMUSG00000035504/ENSMUSG00000025900/ENSMUSG00000031450/ENSMUSG00000017146/ENSMUSG00000029064/ENSMUSG00000023979/ENSMUSG00000044375/ENSMUSG00000037446/ENSMUSG00000024842/ENSMUSG00000023982/ENSMUSG00000030265/…	Aqp1/Cngb1/Rho/Rgs9bp/Pde6b/Cacna1f/Gucy2f/Ect2/Gnat1/Rs1/Reep6/Rp1/Grk1/Brca1/Gnb1/Guca1b/Pcare/Tulp1/Cabp4/Guca1a/Kras/Rcvrn/Cacna2d4/Tigar/Hist3h2a/Pde8b/Sgk1/Map4k3/Atp8a2/Rad54b/Aipl1/Blm/Xrcc2/Rad51/Sirt1/Stk11/Pold1/Trove2/Mettl3/Rad51ap1/Rad9b/1700007K13Rik/Ccdc66/Inip/Fignl1/Dnmt3a/Mc1r/Gm28043/Brca2/Fbxl3/Nipbl/Rdh11/Hmgcr/Sprtn/Usp2	55
BP	GO:0009416	response to light stimulus	41|1223	278|16518	1.72289e-05	0.00263213	ENSMUSG00000004655/ENSMUSG00000031789/ENSMUSG00000030324/ENSMUSG00000056043/ENSMUSG00000029491/ENSMUSG00000031142/ENSMUSG00000042282/ENSMUSG00000034837/ENSMUSG00000031293/ENSMUSG00000035504/ENSMUSG00000025900/ENSMUSG00000031450/ENSMUSG00000029064/ENSMUSG00000023979/ENSMUSG00000044375/ENSMUSG00000037446/ENSMUSG00000024842/ENSMUSG00000023982/ENSMUSG00000030265/ENSMUSG00000020907/ENSMUSG00000041460/…	Aqp1/Cngb1/Rho/Rgs9bp/Pde6b/Cacna1f/Gucy2f/Gnat1/Rs1/Reep6/Rp1/Grk1/Gnb1/Guca1b/Pcare/Tulp1/Cabp4/Guca1a/Kras/Rcvrn/Cacna2d4/Hist3h2a/Pde8b/Sgk1/Map4k3/Atp8a2/Aipl1/Sirt1/Stk11/Pold1/Trove2/Mettl3/1700007K13Rik/Ccdc66/Mc1r/Brca2/Fbxl3/Rdh11/Hmgcr/Sprtn/Usp2	41
CC	GO:0000922	spindle pole	25|1237	149|16707	9.37731e-05	0.00290228	ENSMUSG00000027331/ENSMUSG00000025420/ENSMUSG00000038241/ENSMUSG00000070730/ENSMUSG00000002058/ENSMUSG00000029910/ENSMUSG00000042050/ENSMUSG00000044700/ENSMUSG00000024795/ENSMUSG00000050930/ENSMUSG00000019952/ENSMUSG00000023072/ENSMUSG00000041840/ENSMUSG00000039298/ENSMUSG00000037443/ENSMUSG00000032534/ENSMUSG00000058070/ENSMUSG00000039630/ENSMUSG00000056763/ENSMUSG00000040021/ENSMUSG00000027883/…	Knstrn/Katnal2/Cep250/Rmdn3/Unc119/Mad2l1/Wdr60/Tmem201/Kif20b/Map10/Poc1b/Cep89/Haus1/Cdk5rap2/Cep85/Cep63/Eml1/Hnrnpu/Cspp1/Lats1/Gpsm2/Aurka/Cep95/Ikbkg/Kifc1	25
CC	GO:0036038	MKS complex	6|1237	12|16707	0.000101897	0.00300353	ENSMUSG00000039765/ENSMUSG00000038593/ENSMUSG00000019971/ENSMUSG00000034121/ENSMUSG00000049488/ENSMUSG00000020895	Cc2d2a/Tctn1/Cep290/Mks1/Tmem67/Tmem107	6
CC	GO:0031514	motile cilium	26|1237	162|16707	0.000145626	0.00403709	ENSMUSG00000022911/ENSMUSG00000029601/ENSMUSG00000031755/ENSMUSG00000063229/ENSMUSG00000035578/ENSMUSG00000030695/ENSMUSG00000032221/ENSMUSG00000006464/ENSMUSG00000056598/ENSMUSG00000029469/ENSMUSG00000056752/ENSMUSG00000038570/ENSMUSG00000023072/ENSMUSG00000021363/ENSMUSG00000040473/ENSMUSG00000032097/ENSMUSG00000040040/ENSMUSG00000030688/ENSMUSG00000020930/ENSMUSG00000062859/ENSMUSG00000060798/…	Arl13b/Iqcd/Bbs2/Ldha/Iqcg/Aldoa/Mns1/Bbs1/Drc3/Ift81/Dnah9/Saxo2/Cep89/Mak/Cfap69/Ddx6/Ift88/Stard10/Ccdc103/Tcp11/Intu/Gas8/Lrrc46/Nme5/Hsp90aa1/Ccdc181	26
CC	GO:0097014	ciliary plasm	20|1237	110|16707	0.000150005	0.00403709	ENSMUSG00000030276/ENSMUSG00000037325/ENSMUSG00000025900/ENSMUSG00000022911/ENSMUSG00000046049/ENSMUSG00000057132/ENSMUSG00000032221/ENSMUSG00000006464/ENSMUSG00000035126/ENSMUSG00000056598/ENSMUSG00000056752/ENSMUSG00000038570/ENSMUSG00000025035/ENSMUSG00000021363/ENSMUSG00000021918/ENSMUSG00000063145/ENSMUSG00000040220/ENSMUSG00000066643/ENSMUSG00000034292/ENSMUSG00000039632	Ttll3/Bbs7/Rp1/Arl13b/Rp1l1/Rpgrip1/Mns1/Bbs1/Wdr78/Drc3/Dnah9/Saxo2/Arl3/Mak/Nek4/Bbs5/Gas8/Wdr35/Traf3ip1/Ccdc151	20
BP	GO:0060219	camera-type eye photoreceptor cell differentiation	8|1223	19|16518	3.18547e-05	0.0047145	ENSMUSG00000071648/ENSMUSG00000025900/ENSMUSG00000024842/ENSMUSG00000021013/ENSMUSG00000028977/ENSMUSG00000029086/ENSMUSG00000036192/ENSMUSG00000021730	Rom1/Rp1/Cabp4/Ttc8/Casz1/Prom1/Rorb/Hcn1	8
BP	GO:0007098	centrosome cycle	22|1223	117|16518	4.21197e-05	0.00604482	ENSMUSG00000020212/ENSMUSG00000038070/ENSMUSG00000032902/ENSMUSG00000038241/ENSMUSG00000017146/ENSMUSG00000025437/ENSMUSG00000040860/ENSMUSG00000048799/ENSMUSG00000041840/ENSMUSG00000032782/ENSMUSG00000028933/ENSMUSG00000039298/ENSMUSG00000037443/ENSMUSG00000032534/ENSMUSG00000020290/ENSMUSG00000049488/ENSMUSG00000063450/ENSMUSG00000043065/ENSMUSG00000068394/ENSMUSG00000041147/ENSMUSG00000027496/…	Mdm1/Cntln/Slc16a1/Cep250/Brca1/Usp33/Crocc/Cep120/Haus1/Cntrob/Xrcc2/Cdk5rap2/Cep85/Cep63/Xpo1/Tmem67/Syne2/Spice1/Cep152/Brca2/Aurka/Kifc1	22
CC	GO:0045120	pronucleus	7|1237	19|16707	0.000273372	0.00705072	ENSMUSG00000034832/ENSMUSG00000027715/ENSMUSG00000015165/ENSMUSG00000024045/ENSMUSG00000030528/ENSMUSG00000018666/ENSMUSG00000027496	Tet3/Ccna2/Hnrnpl/Akap8/Blm/Cbx1/Aurka	7
CC	GO:0005930	axoneme	19|1237	109|16707	0.00038066	0.00942514	ENSMUSG00000030276/ENSMUSG00000037325/ENSMUSG00000025900/ENSMUSG00000022911/ENSMUSG00000046049/ENSMUSG00000057132/ENSMUSG00000032221/ENSMUSG00000006464/ENSMUSG00000035126/ENSMUSG00000056598/ENSMUSG00000056752/ENSMUSG00000038570/ENSMUSG00000025035/ENSMUSG00000021363/ENSMUSG00000063145/ENSMUSG00000040220/ENSMUSG00000066643/ENSMUSG00000034292/ENSMUSG00000039632	Ttll3/Bbs7/Rp1/Arl13b/Rp1l1/Rpgrip1/Mns1/Bbs1/Wdr78/Drc3/Dnah9/Saxo2/Arl3/Mak/Bbs5/Gas8/Wdr35/Traf3ip1/Ccdc151	19
CC	GO:0000779	condensed chromosome, centromeric region	18|1237	102|16707	0.000460215	0.0109567	ENSMUSG00000027331/ENSMUSG00000005233/ENSMUSG00000029910/ENSMUSG00000020739/ENSMUSG00000024660/ENSMUSG00000059851/ENSMUSG00000029177/ENSMUSG00000017421/ENSMUSG00000039630/ENSMUSG00000038025/ENSMUSG00000062510/ENSMUSG00000045098/ENSMUSG00000001065/ENSMUSG00000052798/ENSMUSG00000027496/ENSMUSG00000020107/ENSMUSG00000026683/ENSMUSG00000020492	Knstrn/Spc25/Mad2l1/Nup85/Incenp/Kmt5c/Cenpa/Zfp207/Hnrnpu/Phf2/Nsl1/Kmt5b/Zfp276/Nup107/Aurka/Anapc16/Nuf2/Ska2	18
BP	GO:0031023	microtubule organizing center organization	23|1223	132|16518	9.76956e-05	0.0136084	ENSMUSG00000020212/ENSMUSG00000038070/ENSMUSG00000032902/ENSMUSG00000038241/ENSMUSG00000017146/ENSMUSG00000025437/ENSMUSG00000040860/ENSMUSG00000048799/ENSMUSG00000041840/ENSMUSG00000032782/ENSMUSG00000028933/ENSMUSG00000039298/ENSMUSG00000037443/ENSMUSG00000032534/ENSMUSG00000020290/ENSMUSG00000064302/ENSMUSG00000049488/ENSMUSG00000063450/ENSMUSG00000043065/ENSMUSG00000068394/ENSMUSG00000041147/…	Mdm1/Cntln/Slc16a1/Cep250/Brca1/Usp33/Crocc/Cep120/Haus1/Cntrob/Xrcc2/Cdk5rap2/Cep85/Cep63/Xpo1/Clasp1/Tmem67/Syne2/Spice1/Cep152/Brca2/Aurka/Kifc1	23
BP	GO:0001654	eye development	46|1223	351|16518	0.000109191	0.0144341	ENSMUSG00000023978/ENSMUSG00000040632/ENSMUSG00000004655/ENSMUSG00000071648/ENSMUSG00000032292/ENSMUSG00000030324/ENSMUSG00000020212/ENSMUSG00000029491/ENSMUSG00000041578/ENSMUSG00000030323/ENSMUSG00000025380/ENSMUSG00000037325/ENSMUSG00000035517/ENSMUSG00000034837/ENSMUSG00000026819/ENSMUSG00000031293/ENSMUSG00000025900/ENSMUSG00000046049/ENSMUSG00000029064/ENSMUSG00000037446/ENSMUSG00000024842/…	Prph2/Nrl/Aqp1/Rom1/Nr2e3/Rho/Mdm1/Pde6b/Crx/Ift122/Fscn2/Bbs7/Tdrd7/Gnat1/Slc25a25/Rs1/Rp1/Rp1l1/Gnb1/Tulp1/Cabp4/Ttc8/Tub/Rxra/Rpgrip1/Casz1/Cc2d2a/Vax2/Prom1/Crb1/Atp8a2/Rorb/Slc17a7/Jag1/Cep290/Hcn1/Cited2/Pou2f1/Dlg1/Ccdc66/Max/Tbc1d32/Traf3ip1/Mterf4/Nipbl/Nphp4	46
BP	GO:0048871	multicellular organismal homeostasis	42|1223	311|16518	0.000109719	0.0144341	ENSMUSG00000004655/ENSMUSG00000031789/ENSMUSG00000030324/ENSMUSG00000020212/ENSMUSG00000034829/ENSMUSG00000021803/ENSMUSG00000025900/ENSMUSG00000021255/ENSMUSG00000046049/ENSMUSG00000039137/ENSMUSG00000028125/ENSMUSG00000037446/ENSMUSG00000031755/ENSMUSG00000031028/ENSMUSG00000030265/ENSMUSG00000030527/ENSMUSG00000006464/ENSMUSG00000021396/ENSMUSG00000040860/ENSMUSG00000029086/ENSMUSG00000019952/…	Aqp1/Cngb1/Rho/Mdm1/Nxnl1/Cdhr1/Rp1/Esrrb/Rp1l1/Whrn/Abca4/Tulp1/Bbs2/Tub/Kras/Crtc3/Bbs1/Nxnl2/Crocc/Prom1/Poc1b/Hfe/Lrrk1/Acadvl/Gigyf2/Tfrc/Aipl1/Arrdc3/Mak/Ceacam1/Sirt1/Stk11/Cep290/Ush2a/Mks1/Pask/Sgip1/Ccdc66/Adam8/Inpp5k/Add1/Nphp4	42
CC	GO:0000800	lateral element	6|1237	16|16707	0.000682154	0.015639	ENSMUSG00000017146/ENSMUSG00000024660/ENSMUSG00000030528/ENSMUSG00000027323/ENSMUSG00000036928/ENSMUSG00000041147	Brca1/Incenp/Blm/Rad51/Stag3/Brca2	6
BP	GO:0006281	DNA repair	53|1223	426|16518	0.000134132	0.0171689	ENSMUSG00000061288/ENSMUSG00000017146/ENSMUSG00000025384/ENSMUSG00000020718/ENSMUSG00000038028/ENSMUSG00000078851/ENSMUSG00000041560/ENSMUSG00000091971/ENSMUSG00000006599/ENSMUSG00000024943/ENSMUSG00000078773/ENSMUSG00000027353/ENSMUSG00000030528/ENSMUSG00000028933/ENSMUSG00000027323/ENSMUSG00000020063/ENSMUSG00000059772/ENSMUSG00000007646/ENSMUSG00000002835/ENSMUSG00000014850/ENSMUSG00000006288/…	Taok3/Brca1/Faap100/Polg2/Tigar/Hist3h2a/Nop53/Hspa1a/Gtf2h1/Smc5/Rad54b/Mcm8/Blm/Xrcc2/Rad51/Sirt1/Slx1b/Rad51c/Chaf1a/Msh3/Ttc5/Pold1/Helq/Sfpq/Rpa2/Atrip/Recql/Rad51ap1/Rad9b/Hinfp/Rdm1/Smug1/Aplf/Cdc7/Gtf2h4/Poli/Swsap1/Wrap53/Inip/Fignl1/Ino80c/Mc1r/Zfyve26/Gm28043/Exd2/Neil2/Emsy/Brca2/Mre11a/Gins4/Fancf/Nipbl/Sprtn	53
BP	GO:0001578	microtubule bundle formation	18|1223	94|16518	0.000160567	0.0200117	ENSMUSG00000030276/ENSMUSG00000025900/ENSMUSG00000056215/ENSMUSG00000046049/ENSMUSG00000031755/ENSMUSG00000035578/ENSMUSG00000039765/ENSMUSG00000025857/ENSMUSG00000017421/ENSMUSG00000039298/ENSMUSG00000020930/ENSMUSG00000064302/ENSMUSG00000049550/ENSMUSG00000046753/ENSMUSG00000040220/ENSMUSG00000033949/ENSMUSG00000038122/ENSMUSG00000039632	Ttll3/Rp1/Lrguk/Rp1l1/Bbs2/Iqcg/Cc2d2a/Dnaaf5/Zfp207/Cdk5rap2/Ccdc103/Clasp1/Clip1/Ccdc66/Gas8/Trim36/Tbc1d32/Ccdc151	18
BP	GO:0035721	intraciliary retrograde transport	6|1223	13|16518	0.000177358	0.020487	ENSMUSG00000030323/ENSMUSG00000032514/ENSMUSG00000006464/ENSMUSG00000009828/ENSMUSG00000066643/ENSMUSG00000007867	Ift122/Ttc21a/Bbs1/Ick/Wdr35/Ift43	6
BP	GO:0045717	negative regulation of fatty acid biosynthetic process	6|1223	13|16518	0.000177358	0.020487	ENSMUSG00000017146/ENSMUSG00000032715/ENSMUSG00000018574/ENSMUSG00000037622/ENSMUSG00000074272/ENSMUSG00000020063	Brca1/Trib3/Acadvl/Wdtc1/Ceacam1/Sirt1	6
BP	GO:0097499	protein localization to non-motile cilium	6|1223	13|16518	0.000177358	0.020487	ENSMUSG00000022911/ENSMUSG00000044375/ENSMUSG00000037446/ENSMUSG00000031028/ENSMUSG00000052549/ENSMUSG00000084957	Arl13b/Pcare/Tulp1/Tub/Arl13a/Bbip1	6
BP	GO:0006310	DNA recombination	34|1223	240|16518	0.00019344	0.0218126	ENSMUSG00000017146/ENSMUSG00000051977/ENSMUSG00000054717/ENSMUSG00000024943/ENSMUSG00000078773/ENSMUSG00000022797/ENSMUSG00000027353/ENSMUSG00000030528/ENSMUSG00000028933/ENSMUSG00000027323/ENSMUSG00000059772/ENSMUSG00000032534/ENSMUSG00000007646/ENSMUSG00000023977/ENSMUSG00000014850/ENSMUSG00000035266/ENSMUSG00000028820/ENSMUSG00000028884/ENSMUSG00000030243/ENSMUSG00000030346/ENSMUSG00000010362/…	Brca1/Prdm9/Hmgb2/Smc5/Rad54b/Tfrc/Mcm8/Blm/Xrcc2/Rad51/Slx1b/Cep63/Rad51c/Ubr2/Msh3/Helq/Sfpq/Rpa2/Recql/Rad51ap1/Rdm1/Aplf/Cdc7/Swsap1/Wrap53/Fignl1/Ino80c/Zfyve26/Exd2/Brca2/Mre11a/Gins4/Nipbl/Hist1h1c	34
BP	GO:0043010	camera-type eye development	40|1223	300|16518	0.00020797	0.0229057	ENSMUSG00000023978/ENSMUSG00000004655/ENSMUSG00000071648/ENSMUSG00000032292/ENSMUSG00000030324/ENSMUSG00000020212/ENSMUSG00000029491/ENSMUSG00000041578/ENSMUSG00000030323/ENSMUSG00000035517/ENSMUSG00000034837/ENSMUSG00000026819/ENSMUSG00000031293/ENSMUSG00000025900/ENSMUSG00000046049/ENSMUSG00000029064/ENSMUSG00000037446/ENSMUSG00000024842/ENSMUSG00000021013/ENSMUSG00000031028/ENSMUSG00000015846/…	Prph2/Aqp1/Rom1/Nr2e3/Rho/Mdm1/Pde6b/Crx/Ift122/Tdrd7/Gnat1/Slc25a25/Rs1/Rp1/Rp1l1/Gnb1/Tulp1/Cabp4/Ttc8/Tub/Rxra/Rpgrip1/Casz1/Cc2d2a/Vax2/Prom1/Atp8a2/Rorb/Slc17a7/Jag1/Cep290/Hcn1/Cited2/Pou2f1/Dlg1/Max/Tbc1d32/Traf3ip1/Mterf4/Nphp4	40
CC	GO:0002177	manchette	5|1237	12|16707	0.0011248	0.0248662	ENSMUSG00000056215/ENSMUSG00000035578/ENSMUSG00000071636/ENSMUSG00000025916/ENSMUSG00000026578	Lrguk/Iqcg/Rimbp3/Ppp1r42/Ccdc181	5
CC	GO:0030990	intraciliary transport particle	8|1237	30|16707	0.00118534	0.0253009	ENSMUSG00000030323/ENSMUSG00000032514/ENSMUSG00000029469/ENSMUSG00000075271/ENSMUSG00000075273/ENSMUSG00000066643/ENSMUSG00000007867/ENSMUSG00000034292	Ift122/Ttc21a/Ift81/Ttc30a1/Ttc30b/Wdr35/Ift43/Traf3ip1	8
CC	GO:0000792	heterochromatin	15|1237	86|16707	0.00150324	0.0310168	ENSMUSG00000028397/ENSMUSG00000030695/ENSMUSG00000041560/ENSMUSG00000024660/ENSMUSG00000059851/ENSMUSG00000029177/ENSMUSG00000020063/ENSMUSG00000032097/ENSMUSG00000058392/ENSMUSG00000017548/ENSMUSG00000024817/ENSMUSG00000018666/ENSMUSG00000020661/ENSMUSG00000030816/ENSMUSG00000035024	Kdm4c/Aldoa/Nop53/Incenp/Kmt5c/Cenpa/Sirt1/Ddx6/Rrp1b/Suz12/Uhrf2/Cbx1/Dnmt3a/Rnf40/Ncapd3	15
CC	GO:0000794	condensed nuclear chromosome	16|1237	95|16707	0.00155804	0.0311105	ENSMUSG00000017146/ENSMUSG00000024120/ENSMUSG00000024660/ENSMUSG00000059851/ENSMUSG00000030528/ENSMUSG00000029177/ENSMUSG00000027323/ENSMUSG00000036928/ENSMUSG00000038569/ENSMUSG00000045098/ENSMUSG00000028842/ENSMUSG00000041147/ENSMUSG00000027496/ENSMUSG00000031928/ENSMUSG00000026683/ENSMUSG00000035024	Brca1/Lrpprc/Incenp/Kmt5c/Blm/Cenpa/Rad51/Stag3/Rad9b/Kmt5b/Ago3/Brca2/Aurka/Mre11a/Nuf2/Ncapd3	16
CC	GO:1990023	mitotic spindle midzone	5|1237	13|16707	0.00171694	0.0323662	ENSMUSG00000024795/ENSMUSG00000050930/ENSMUSG00000058070/ENSMUSG00000039630/ENSMUSG00000027115	Kif20b/Map10/Eml1/Hnrnpu/Kif18a	5
CC	GO:0000776	kinetochore	19|1237	123|16707	0.0017255	0.0323662	ENSMUSG00000027331/ENSMUSG00000005233/ENSMUSG00000029910/ENSMUSG00000020739/ENSMUSG00000024660/ENSMUSG00000029177/ENSMUSG00000017421/ENSMUSG00000020628/ENSMUSG00000020290/ENSMUSG00000039630/ENSMUSG00000027115/ENSMUSG00000038025/ENSMUSG00000064302/ENSMUSG00000062510/ENSMUSG00000001065/ENSMUSG00000052798/ENSMUSG00000020107/ENSMUSG00000026683/ENSMUSG00000020492	Knstrn/Spc25/Mad2l1/Nup85/Incenp/Cenpa/Zfp207/Trappc12/Xpo1/Hnrnpu/Kif18a/Phf2/Clasp1/Nsl1/Zfp276/Nup107/Anapc16/Nuf2/Ska2	19
MF	GO:0042826	histone deacetylase binding	22|1203	117|16303	3.99811e-05	0.0349035	ENSMUSG00000005583/ENSMUSG00000018362/ENSMUSG00000040712/ENSMUSG00000042570/ENSMUSG00000071646/ENSMUSG00000091971/ENSMUSG00000024045/ENSMUSG00000037622/ENSMUSG00000068154/ENSMUSG00000028820/ENSMUSG00000026313/ENSMUSG00000030256/ENSMUSG00000062906/ENSMUSG00000027905/ENSMUSG00000004698/ENSMUSG00000018678/ENSMUSG00000001419/ENSMUSG00000066900/ENSMUSG00000039512/ENSMUSG00000079033/ENSMUSG00000022141/…	Mef2c/Kpna2/Camta2/Mier2/Mta2/Hspa1a/Akap8/Wdtc1/Insm1/Sfpq/Hdac4/Bhlhe41/Hdac10/Ddx20/Hdac9/Sp2/Mef2d/Suds3/Uhrf1bp1/Mef2b/Nipbl/Hsp90aa1	22
BP	GO:0016569	covalent chromatin modification	52|1223	432|16518	0.000348478	0.0375089	ENSMUSG00000017146/ENSMUSG00000028397/ENSMUSG00000051977/ENSMUSG00000042570/ENSMUSG00000071646/ENSMUSG00000026646/ENSMUSG00000034832/ENSMUSG00000027715/ENSMUSG00000039671/ENSMUSG00000005609/ENSMUSG00000024045/ENSMUSG00000021115/ENSMUSG00000059851/ENSMUSG00000053134/ENSMUSG00000048154/ENSMUSG00000020538/ENSMUSG00000020063/ENSMUSG00000043866/ENSMUSG00000023977/ENSMUSG00000017548/ENSMUSG00000038056/…	Brca1/Kdm4c/Prdm9/Mier2/Mta2/Suv39h2/Tet3/Ccna2/Zmynd8/Ctr9/Akap8/Vrk1/Kmt5c/Supt7l/Kmt2d/Srebf1/Sirt1/Taf10/Ubr2/Suz12/Kmt2c/Phf2/Chd1/Msl2/Sfpq/Hdac4/Usp16/Taf5/Ing5/Mettl8/Kmt5b/Sart3/Ehmt1/Hdac10/Dnmt3a/Gm28043/Hdac9/Rnf40/Kdm3a/Brca2/Dpy30/Aurka/Ash2l/Ctcf/Suds3/Elk4/Nipbl/Hist1h1c/Kdm8/Piwil2/Ezh1/Sap30l	52
MF	GO:0033558	protein deacetylase activity	9|1203	27|16303	8.72439e-05	0.038082	ENSMUSG00000042570/ENSMUSG00000071646/ENSMUSG00000029524/ENSMUSG00000020063/ENSMUSG00000026313/ENSMUSG00000062906/ENSMUSG00000004698/ENSMUSG00000066900/ENSMUSG00000020519	Mier2/Mta2/Sirt4/Sirt1/Hdac4/Hdac10/Hdac9/Suds3/Sap30l	9
BP	GO:0070536	protein K63-linked deubiquitination	9|1223	32|16518	0.000382728	0.04028	ENSMUSG00000019850/ENSMUSG00000025437/ENSMUSG00000036990/ENSMUSG00000041560/ENSMUSG00000038495/ENSMUSG00000025616/ENSMUSG00000026502/ENSMUSG00000046404/ENSMUSG00000043415	Tnfaip3/Usp33/Otud4/Nop53/Otud7b/Usp16/Desi2/Yod1/Otud1	9
BP	GO:0042670	retinal cone cell differentiation	5|1223	10|16518	0.00040572	0.0417715	ENSMUSG00000025900/ENSMUSG00000024842/ENSMUSG00000028977/ENSMUSG00000036192/ENSMUSG00000021730	Rp1/Cabp4/Casz1/Rorb/Hcn1	5
BP	GO:0051298	centrosome duplication	13|1223	61|16518	0.000434889	0.043822	ENSMUSG00000020212/ENSMUSG00000017146/ENSMUSG00000025437/ENSMUSG00000048799/ENSMUSG00000032782/ENSMUSG00000039298/ENSMUSG00000032534/ENSMUSG00000020290/ENSMUSG00000049488/ENSMUSG00000043065/ENSMUSG00000068394/ENSMUSG00000041147/ENSMUSG00000079553	Mdm1/Brca1/Usp33/Cep120/Cntrob/Cdk5rap2/Cep63/Xpo1/Tmem67/Spice1/Cep152/Brca2/Kifc1	13
BP	GO:0007059	chromosome segregation	38|1223	292|16518	0.000479856	0.0473458	ENSMUSG00000027331/ENSMUSG00000027699/ENSMUSG00000005233/ENSMUSG00000017146/ENSMUSG00000034349/ENSMUSG00000029910/ENSMUSG00000050930/ENSMUSG00000024943/ENSMUSG00000015133/ENSMUSG00000024045/ENSMUSG00000024660/ENSMUSG00000030528/ENSMUSG00000017421/ENSMUSG00000039298/ENSMUSG00000037443/ENSMUSG00000020628/ENSMUSG00000036928/ENSMUSG00000032534/ENSMUSG00000007646/ENSMUSG00000024293/ENSMUSG00000039630/…	Knstrn/Ect2/Spc25/Brca1/Smc4/Mad2l1/Map10/Smc5/Lrrk1/Akap8/Incenp/Blm/Zfp207/Cdk5rap2/Cep85/Trappc12/Stag3/Cep63/Rad51c/Esco1/Hnrnpu/Chtf8/Kif18a/Sfpq/Spice1/Lats1/Nsl1/Slc25a5/Brca2/Ctcf/Mre11a/Nipbl/Nuf2/Ncapd3/Kifc1/Ska2/Anapc15/Cdca2	38
