# Supplementary material for: Homeostatic plasticity in the retina is associated with maintenance of night vision during retinal degenerative disease
Source: eLife. 2020 Sep 22;9:e59422. doi: 10.7554/eLife.59422 (PMC7529457; doi:10.7554/eLife.59422)
Supplement: Supplementary file 14. [file elife-59422-supp14.xlsx]

## Sheet: P23HvsWT_up_GOenrich_significan
Category	GOID	Description	GeneRatio	BgRatio	pvalue	padj	geneID	geneName	Count
BP	GO:0009611	response to wounding	110|1439	462|16518	3.68454e-23	2.0077e-19	ENSMUSG00000037225/ENSMUSG00000020932/ENSMUSG00000023224/ENSMUSG00000026923/ENSMUSG00000005087/ENSMUSG00000028583/ENSMUSG00000048612/ENSMUSG00000007655/ENSMUSG00000022912/ENSMUSG00000003534/ENSMUSG00000031328/ENSMUSG00000002985/ENSMUSG00000002602/ENSMUSG00000070509/ENSMUSG00000029231/ENSMUSG00000018593/ENSMUSG00000044786/ENSMUSG00000030342/ENSMUSG00000027168/ENSMUSG00000024659/ENSMUSG00000041075/…	Fgf2/Gfap/Serping1/Notch1/Cd44/Pdpn/Myof/Cav1/Pros1/Ddr1/Flna/Apoe/Axl/Rgma/Pdgfra/Sparc/Zfp36/Cd9/Pax6/Anxa1/Fzd7/Cyr61/Mcam/Sulf2/Prkg1/Elk3/Anxa5/Egfr/Aif1/Ano6/Folr1/Cnn2/Timp1/Rhoc/Pdgfrb/Col5a1/Arhgef19/Ptk7/Matn2/F3/Slc11a1/Wnt5a/Tgfb2/Tlr4/Lcp1/Nbeal2/Hmgb1/Plek/Lamb2/Mertk/Tgfbr2/Cpq/Isl1/Slc1a3/Ccl2/Inpp5f/Anxa2/Nrep/Thbs1/Smad3/Flrt3/Cd24a/Cd151/Trim72/C3/Zfp36l1/Gsn/Yap1/Lyn/Ptprf/Erb…	110
CC	GO:0031012	extracellular matrix	78|1463	298|16707	3.592e-19	2.17316e-16	ENSMUSG00000041782/ENSMUSG00000022893/ENSMUSG00000031502/ENSMUSG00000033327/ENSMUSG00000020044/ENSMUSG00000019997/ENSMUSG00000020467/ENSMUSG00000037820/ENSMUSG00000000957/ENSMUSG00000034463/ENSMUSG00000020674/ENSMUSG00000058897/ENSMUSG00000018593/ENSMUSG00000029838/ENSMUSG00000028195/ENSMUSG00000022483/ENSMUSG00000024940/ENSMUSG00000015647/ENSMUSG00000031273/ENSMUSG00000032554/ENSMUSG00000041936/…	Lad1/Adamts1/Col4a1/Tnxb/Timp3/Ctgf/Efemp1/Tgm2/Mmp14/Scara3/Pxdn/Col25a1/Sparc/Ptn/Cyr61/Col2a1/Ltbp3/Lama5/Col4a6/Trf/Agrn/Fbn1/Timp1/Ltbp1/Col5a1/Thbs2/Abi3bp/Lrrn3/Nid2/Matn2/Wnt5a/Efemp2/Fbln5/Olfml2a/Tgfb2/Gfod2/Tril/Ptprz1/Vit/Cd180/Lamb2/Frem1/Anxa2/Col15a1/Thbs1/P3h1/Col4a5/Tgfbr3/Cd151/Adamts9/Papln/Adamts4/Fn1/Vwf/Itgb1/Rtn4rl2/Adamts10/Entpd1/Fgfr2/Emid1/Col1a2/Loxl1/Lrig1/Col23a1/Ach…	78
CC	GO:0043235	receptor complex	85|1463	349|16707	1.22415e-18	3.70305e-16	ENSMUSG00000022146/ENSMUSG00000026923/ENSMUSG00000030341/ENSMUSG00000005087/ENSMUSG00000030309/ENSMUSG00000060802/ENSMUSG00000035200/ENSMUSG00000031565/ENSMUSG00000019256/ENSMUSG00000003534/ENSMUSG00000030123/ENSMUSG00000025321/ENSMUSG00000032172/ENSMUSG00000001507/ENSMUSG00000002602/ENSMUSG00000026674/ENSMUSG00000029231/ENSMUSG00000024621/ENSMUSG00000001985/ENSMUSG00000074991/ENSMUSG00000021756/…	Osmr/Notch1/Tnfrsf1a/Cd44/Caprin2/B2m/Chrnb4/Fgfr1/Ahr/Ddr1/Plxnd1/Itgb8/Olfm2/Itga3/Axl/Ddr2/Pdgfra/Csf1r/Grik3/Gabrr3/Il6st/App/Plxna2/Gria4/Ghr/Egfr/Trf/Loxl4/Grik2/Itgav/Tlr2/Itgb2/Olfm1/Sdcbp/Itga4/Itgam/Insrr/Ntrk2/Tlr4/Acvr1/Ror2/Tril/Trip6/Notch2/Gprc5b/Mertk/Tgfbr2/Shisa7/Gria1/Lrp8/Itpr3/Plxna1/Smad3/Tgfbr3/Gria3/Notch3/Lyn/Dlgap3/Epha2/Htr3a/Erbb2/Lrp1/Ptpn6/Shisa6/Ptprn2/Plxnb2/Itgb1/…	85
BP	GO:0042060	wound healing	85|1439	351|16518	1.28332e-18	3.49642e-15	ENSMUSG00000037225/ENSMUSG00000023224/ENSMUSG00000026923/ENSMUSG00000005087/ENSMUSG00000028583/ENSMUSG00000048612/ENSMUSG00000007655/ENSMUSG00000022912/ENSMUSG00000003534/ENSMUSG00000031328/ENSMUSG00000002985/ENSMUSG00000002602/ENSMUSG00000029231/ENSMUSG00000018593/ENSMUSG00000030342/ENSMUSG00000024659/ENSMUSG00000041075/ENSMUSG00000028195/ENSMUSG00000032135/ENSMUSG00000052920/ENSMUSG00000008398/…	Fgf2/Serping1/Notch1/Cd44/Pdpn/Myof/Cav1/Pros1/Ddr1/Flna/Apoe/Axl/Pdgfra/Sparc/Cd9/Anxa1/Fzd7/Cyr61/Mcam/Prkg1/Elk3/Anxa5/Egfr/Ano6/Cnn2/Timp1/Rhoc/Pdgfrb/Col5a1/Arhgef19/Ptk7/F3/Slc11a1/Wnt5a/Tgfb2/Tlr4/Nbeal2/Hmgb1/Plek/Mertk/Tgfbr2/Cpq/Ccl2/Anxa2/Thbs1/Smad3/Cd151/Trim72/C3/Gsn/Yap1/Lyn/Erbb2/Ajuba/Ptpn6/Capn3/Abat/Cx3cl1/Fn1/Vwf/Abcc8/Dmtn/Eppk1/Tmeff2/Igsf10/Entpd1/P2ry12/Fgfr2/Cd34/Gap43/Va…	85
CC	GO:0044420	extracellular matrix component	45|1463	124|16707	1.99154e-17	4.01628e-15	ENSMUSG00000041782/ENSMUSG00000022893/ENSMUSG00000031502/ENSMUSG00000033327/ENSMUSG00000020044/ENSMUSG00000020467/ENSMUSG00000018593/ENSMUSG00000029838/ENSMUSG00000022483/ENSMUSG00000015647/ENSMUSG00000031273/ENSMUSG00000032554/ENSMUSG00000041936/ENSMUSG00000027204/ENSMUSG00000001131/ENSMUSG00000001870/ENSMUSG00000026837/ENSMUSG00000023885/ENSMUSG00000021806/ENSMUSG00000022324/ENSMUSG00000021186/…	Lad1/Adamts1/Col4a1/Tnxb/Timp3/Efemp1/Sparc/Ptn/Col2a1/Lama5/Col4a6/Trf/Agrn/Fbn1/Timp1/Ltbp1/Col5a1/Thbs2/Nid2/Matn2/Fbln5/Tgfb2/Ptprz1/Lamb2/Frem1/Anxa2/Col15a1/P3h1/Col4a5/Cd151/Papln/Fn1/Itgb1/Adamts10/Entpd1/Col1a2/Loxl1/Ache/Hmcn1/Lama1/Itga6/Emilin1/Ang/Col4a2/Col11a1	45
BP	GO:0030335	positive regulation of cell migration	103|1439	481|16518	3.59352e-18	6.30399e-15	ENSMUSG00000037225/ENSMUSG00000028635/ENSMUSG00000004040/ENSMUSG00000026923/ENSMUSG00000034845/ENSMUSG00000028583/ENSMUSG00000037405/ENSMUSG00000022893/ENSMUSG00000031565/ENSMUSG00000024087/ENSMUSG00000007655/ENSMUSG00000021701/ENSMUSG00000014599/ENSMUSG00000031328/ENSMUSG00000028517/ENSMUSG00000000957/ENSMUSG00000001507/ENSMUSG00000062960/ENSMUSG00000026674/ENSMUSG00000026072/ENSMUSG00000029231/…	Fgf2/Edn2/Stat3/Notch1/Plvap/Pdpn/Icam1/Adamts1/Fgfr1/Cyp1b1/Cav1/Plk2/Csf1/Flna/Plpp3/Mmp14/Itga3/Kdr/Ddr2/Il1r1/Pdgfra/Rhoj/Sparc/Ctsh/Pax6/Anxa1/Igfbp5/Gnai2/Cxcl10/Csf1r/Cyr61/Mcam/Il6st/App/Cdh13/Adgra2/Dock1/Egfr/Glipr2/Hdac7/Aif1/Sox9/Ano6/Rapgef3/Rhoc/Itgav/Lgals3/Gab1/Pdgfrb/Smo/Ptprc/Dock7/Map4k4/Sema3e/Sdcbp/Itga4/Wnt5a/Lgals9/Tgfb2/Acvr1/Ror2/Trip6/Cd99l2/Ptprz1/Hmgb1/Tgfbr2/Rock2/Ccl…	103
BP	GO:2000147	positive regulation of cell motility	105|1439	497|16518	4.62763e-18	6.30399e-15	ENSMUSG00000037225/ENSMUSG00000028635/ENSMUSG00000004040/ENSMUSG00000026923/ENSMUSG00000034845/ENSMUSG00000028583/ENSMUSG00000037405/ENSMUSG00000022893/ENSMUSG00000031565/ENSMUSG00000024087/ENSMUSG00000007655/ENSMUSG00000021701/ENSMUSG00000014599/ENSMUSG00000031328/ENSMUSG00000028517/ENSMUSG00000000957/ENSMUSG00000001507/ENSMUSG00000062960/ENSMUSG00000026674/ENSMUSG00000026072/ENSMUSG00000029231/…	Fgf2/Edn2/Stat3/Notch1/Plvap/Pdpn/Icam1/Adamts1/Fgfr1/Cyp1b1/Cav1/Plk2/Csf1/Flna/Plpp3/Mmp14/Itga3/Kdr/Ddr2/Il1r1/Pdgfra/Rhoj/Sparc/Ctsh/Pax6/Anxa1/Igfbp5/Gnai2/Cxcl10/Csf1r/Cyr61/Mcam/Il6st/App/Cavin1/Cdh13/Adgra2/Dock1/Egfr/Glipr2/Trf/Hdac7/Aif1/Sox9/Ano6/Rapgef3/Rhoc/Itgav/Lgals3/Gab1/Pdgfrb/Smo/Ptprc/Dock7/Map4k4/Sema3e/Sdcbp/Itga4/Wnt5a/Lgals9/Tgfb2/Acvr1/Ror2/Trip6/Cd99l2/Ptprz1/Hmgb1/Tgfbr…	105
BP	GO:0001525	angiogenesis	99|1439	465|16518	2.51408e-17	2.73985e-14	ENSMUSG00000037225/ENSMUSG00000004040/ENSMUSG00000026923/ENSMUSG00000030341/ENSMUSG00000064246/ENSMUSG00000022893/ENSMUSG00000031502/ENSMUSG00000031565/ENSMUSG00000024087/ENSMUSG00000007655/ENSMUSG00000021701/ENSMUSG00000019997/ENSMUSG00000016918/ENSMUSG00000030123/ENSMUSG00000030671/ENSMUSG00000031328/ENSMUSG00000052336/ENSMUSG00000023031/ENSMUSG00000025321/ENSMUSG00000034394/ENSMUSG00000000957/…	Fgf2/Stat3/Notch1/Tnfrsf1a/Chil1/Adamts1/Col4a1/Fgfr1/Cyp1b1/Cav1/Plk2/Ctgf/Sulf1/Plxnd1/Pde3b/Flna/Cx3cr1/Cela1/Itgb8/Lif/Mmp14/Kdr/Pdgfra/Rhoj/Sparc/Ctsh/Anxa1/Ptn/Cxcl10/Cyr61/Stat1/Mcam/S100a1/Elk3/Cdh13/Adgra2/Card10/Rnf213/Hdac7/Dll1/Rapgef3/Itgav/Gab1/Thbs2/Itgb2/Sema3e/Wnt5a/Tgfb2/Acvr1/Hmgb1/Tgfbr2/Ddah1/Isl1/Rock2/Ccl2/Prkcb/Sash1/Efna1/Anxa2/Thbs1/Plcg1/Adamts9/C3/Enpp2/Notch3/Epha2/Cc…	99
BP	GO:0045785	positive regulation of cell adhesion	83|1439	355|16518	3.20207e-17	2.90802e-14	ENSMUSG00000005087/ENSMUSG00000028583/ENSMUSG00000022272/ENSMUSG00000037405/ENSMUSG00000007655/ENSMUSG00000022508/ENSMUSG00000027962/ENSMUSG00000014599/ENSMUSG00000031328/ENSMUSG00000055447/ENSMUSG00000037820/ENSMUSG00000028517/ENSMUSG00000001507/ENSMUSG00000025351/ENSMUSG00000062960/ENSMUSG00000067212/ENSMUSG00000019982/ENSMUSG00000024659/ENSMUSG00000029838/ENSMUSG00000028195/ENSMUSG00000018899/…	Cd44/Pdpn/Myo10/Icam1/Cav1/Bcl6/Vcam1/Csf1/Flna/Cd47/Tgm2/Plpp3/Itga3/Cd63/Kdr/H2-T23/Myb/Anxa1/Ptn/Cyr61/Irf1/Il6st/Cdh13/Dock1/Aif1/Itgav/S100a10/Ptprc/Abi3bp/Il21/Flot1/Itga4/Wnt5a/Lgals9/Flot2/H2-M3/Tgfb2/Ptprj/Vit/Cdk6/Hmgb1/Tgfbr2/Ccl2/Cd274/Nckap1l/Rasal3/Smad3/Cd24a/Myadm/H2-Ab1/Enpp2/Ccdc88b/Erbb2/Lgals1/Ptpn6/Cx3cl1/Cd276/Stat5b/Efnb1/Fn1/Itgb1/Ccr5/Dmtn/Ccl28/P2ry12/Emid1/Zmiz1/Gcnt2/V…	83
BP	GO:0042063	gliogenesis	72|1439	284|16518	4.23345e-17	3.29544e-14	ENSMUSG00000037225/ENSMUSG00000004040/ENSMUSG00000020932/ENSMUSG00000026923/ENSMUSG00000022037/ENSMUSG00000026728/ENSMUSG00000014599/ENSMUSG00000020467/ENSMUSG00000034394/ENSMUSG00000028517/ENSMUSG00000000957/ENSMUSG00000023915/ENSMUSG00000024810/ENSMUSG00000019982/ENSMUSG00000030342/ENSMUSG00000027168/ENSMUSG00000024659/ENSMUSG00000029838/ENSMUSG00000021756/ENSMUSG00000022892/ENSMUSG00000020122/…	Fgf2/Stat3/Gfap/Notch1/Clu/Vim/Csf1/Efemp1/Lif/Plpp3/Mmp14/Tnfrsf21/Il33/Myb/Cd9/Pax6/Anxa1/Ptn/Il6st/App/Egfr/Trf/Sox9/Dll1/Lgi4/Smo/Tlr2/Hexb/Matn2/Adgrg6/Cntnap1/Ntrk2/Tgfb2/Tlr4/Nfib/Ror2/Ptprz1/Clcf1/Cdk6/Lamb2/Nfix/Ccl2/Arhgef10/Neurod4/Lrp8/Mxra8/Sox6/Enpp2/Gsn/Lyn/Erbb2/Ccl12/Lrp1/Ttbk1/Cx3cl1/Fn1/Abcc8/Dab2ip/Idh2/P2ry12/Bmp4/Tspo/Gpr157/Prkch/Gap43/Lingo1/Id4/S100b/2900011O08Rik/Mmp24/S…	72
CC	GO:0098552	side of membrane	96|1463	466|16707	1.042e-15	1.57603e-13	ENSMUSG00000020932/ENSMUSG00000029338/ENSMUSG00000016763/ENSMUSG00000024697/ENSMUSG00000028583/ENSMUSG00000061232/ENSMUSG00000037405/ENSMUSG00000060802/ENSMUSG00000023439/ENSMUSG00000073411/ENSMUSG00000001025/ENSMUSG00000027962/ENSMUSG00000024411/ENSMUSG00000026980/ENSMUSG00000052336/ENSMUSG00000002985/ENSMUSG00000001507/ENSMUSG00000031207/ENSMUSG00000026072/ENSMUSG00000029231/ENSMUSG00000067212/…	Gfap/Antxr2/Scube1/Gna14/Pdpn/H2-K1/Icam1/B2m/Gnb3/H2-D1/S100a6/Vcam1/Aqp4/Ly75/Cx3cr1/Apoe/Itga3/Msn/Il1r1/Pdgfra/H2-T23/Cd9/Anxa1/Gnb2/Gnai2/Cxcl10/Mcam/Il6st/Anxa5/Akap5/Stac2/Cdh13/Ghr/Adgra3/Ano1/Pkd2/Trf/Abca1/Folr1/Itgav/Ptprc/Flot1/Farp1/Dtna/Fas/Lag3/Cd33/Fyn/H2-M3/Tlr4/Gng12/P2rx7/Tgfbr2/Kcnip1/Gnai3/Cd274/Ptpn1/Thbs1/Rasal3/Adgre1/Cd24a/Tgfbr3/Gng7/H2-Ab1/Ezr/Lyn/Gem/H2-Q7/Ptpn3/Cd276/…	96
CC	GO:0005578	proteinaceous extracellular matrix	42|1463	121|16707	1.47171e-15	1.78077e-13	ENSMUSG00000041782/ENSMUSG00000022893/ENSMUSG00000031502/ENSMUSG00000033327/ENSMUSG00000020044/ENSMUSG00000020467/ENSMUSG00000018593/ENSMUSG00000029838/ENSMUSG00000022483/ENSMUSG00000015647/ENSMUSG00000031273/ENSMUSG00000032554/ENSMUSG00000041936/ENSMUSG00000027204/ENSMUSG00000001131/ENSMUSG00000026837/ENSMUSG00000023885/ENSMUSG00000035258/ENSMUSG00000021806/ENSMUSG00000022324/ENSMUSG00000039239/…	Lad1/Adamts1/Col4a1/Tnxb/Timp3/Efemp1/Sparc/Ptn/Col2a1/Lama5/Col4a6/Trf/Agrn/Fbn1/Timp1/Col5a1/Thbs2/Abi3bp/Nid2/Matn2/Tgfb2/Vit/Lamb2/Frem1/Anxa2/Col15a1/P3h1/Col4a5/Cd151/Papln/Fn1/Itgb1/Entpd1/Col1a2/Loxl1/Ache/Hmcn1/Lama1/Itga6/Ang/Col4a2/Col11a1	42
MF	GO:0005539	glycosaminoglycan binding	53|1421	175|16303	1.98001e-16	1.86913e-13	ENSMUSG00000037225/ENSMUSG00000029718/ENSMUSG00000005087/ENSMUSG00000022893/ENSMUSG00000031565/ENSMUSG00000033327/ENSMUSG00000019997/ENSMUSG00000016918/ENSMUSG00000002985/ENSMUSG00000026365/ENSMUSG00000058897/ENSMUSG00000050069/ENSMUSG00000029838/ENSMUSG00000034855/ENSMUSG00000028195/ENSMUSG00000041577/ENSMUSG00000006800/ENSMUSG00000027712/ENSMUSG00000022892/ENSMUSG00000041936/ENSMUSG00000027204/…	Fgf2/Pcolce/Cd44/Adamts1/Fgfr1/Tnxb/Ctgf/Sulf1/Apoe/Cfh/Col25a1/Grem2/Ptn/Cxcl10/Cyr61/Prelp/Sulf2/Anxa5/App/Agrn/Fbn1/Trem2/Col5a1/Thbs2/Ptprc/Tlr2/Abi3bp/Vit/Hmgb1/Tgfbr2/Ccl2/Fstl1/Thbs1/Tgfbr3/Adamts5/Ptprf/Sfrp1/Anxa6/Mdk/Fn1/Aplp1/Ighm/Bmp4/Rtn4rl1/Col23a1/Anxa4/Extl2/Spock3/Slit2/Ndnf/Ang/Col11a1/Serpine2	53
CC	GO:0005604	basement membrane	37|1463	97|16707	2.20605e-15	2.22443e-13	ENSMUSG00000041782/ENSMUSG00000022893/ENSMUSG00000031502/ENSMUSG00000020044/ENSMUSG00000020467/ENSMUSG00000018593/ENSMUSG00000029838/ENSMUSG00000022483/ENSMUSG00000015647/ENSMUSG00000031273/ENSMUSG00000032554/ENSMUSG00000041936/ENSMUSG00000027204/ENSMUSG00000001131/ENSMUSG00000026837/ENSMUSG00000023885/ENSMUSG00000021806/ENSMUSG00000022324/ENSMUSG00000039239/ENSMUSG00000052911/ENSMUSG00000059049/…	Lad1/Adamts1/Col4a1/Timp3/Efemp1/Sparc/Ptn/Col2a1/Lama5/Col4a6/Trf/Agrn/Fbn1/Timp1/Col5a1/Thbs2/Nid2/Matn2/Tgfb2/Lamb2/Frem1/Anxa2/Col15a1/P3h1/Col4a5/Cd151/Papln/Fn1/Itgb1/Entpd1/Loxl1/Ache/Hmcn1/Lama1/Itga6/Ang/Col4a2	37
BP	GO:0034341	response to interferon-gamma	44|1439	129|16518	5.39068e-16	3.67173e-13	ENSMUSG00000028270/ENSMUSG00000040253/ENSMUSG00000029298/ENSMUSG00000026728/ENSMUSG00000028268/ENSMUSG00000025492/ENSMUSG00000024411/ENSMUSG00000046879/ENSMUSG00000022906/ENSMUSG00000069874/ENSMUSG00000034422/ENSMUSG00000104713/ENSMUSG00000074151/ENSMUSG00000023460/ENSMUSG00000018899/ENSMUSG00000026104/ENSMUSG00000046718/ENSMUSG00000024397/ENSMUSG00000105504/ENSMUSG00000025888/ENSMUSG00000076441/…	Gbp2/Gbp7/Gbp9/Vim/Gbp3/Ifitm3/Aqp4/Irgm1/Parp9/Irgm2/Parp14/Gbp6/Nlrc5/Rab12/Irf1/Stat1/Bst2/Aif1/Gbp5/Casp1/Ass1/Tlr2/Cited1/Irf8/Slc11a1/Wnt5a/Nmi/Tlr4/Zyx/Gbp4/Rab7b/Ccl2/H2-Ab1/Gsn/Cdc42ep4/H2-Q7/Ccl12/Cx3cl1/Myo1c/Dapk1/A230050P20Rik/Trim21/Ccl9/Flnb	44
CC	GO:0045121	membrane raft	76|1463	347|16707	3.9416e-14	3.40667e-12	ENSMUSG00000055368/ENSMUSG00000030341/ENSMUSG00000034845/ENSMUSG00000028583/ENSMUSG00000037405/ENSMUSG00000048612/ENSMUSG00000007655/ENSMUSG00000016918/ENSMUSG00000028599/ENSMUSG00000062960/ENSMUSG00000032562/ENSMUSG00000026509/ENSMUSG00000033161/ENSMUSG00000046718/ENSMUSG00000022892/ENSMUSG00000004044/ENSMUSG00000031841/ENSMUSG00000020122/ENSMUSG00000055980/ENSMUSG00000035441/ENSMUSG00000032412/…	Slc6a2/Tnfrsf1a/Plvap/Pdpn/Icam1/Myof/Cav1/Sulf1/Tnfrsf1b/Kdr/Gnai2/Capn2/Atp1a1/Bst2/App/Cavin1/Cdh13/Egfr/Irs1/Myo1d/Atp1b3/Prtn3/Abca1/Dll1/S100a10/Smo/Ptprc/Tlr2/Mlc1/Mal/Flot1/Rhoq/Serpinh1/Sdcbp/Fas/Stat6/Flot2/Fyn/Tlr4/Lypd6/Ahnak/Gprc5b/Tgfbr2/Gnai3/Slc2a3/Anxa2/Lrp8/Cd24a/Kcna5/Myadm/Ezr/Grk3/Lyn/Erbb2/Plcd1/Efnb1/Gnai1/Itgb1/Rtn4rl2/P2ry12/Rtn4rl1/Prkar1a/Myo1c/Fcer1g/Itpr1/Lamp2/Ptgs2/…	76
CC	GO:0098857	membrane microdomain	76|1463	348|16707	4.62361e-14	3.4966e-12	ENSMUSG00000055368/ENSMUSG00000030341/ENSMUSG00000034845/ENSMUSG00000028583/ENSMUSG00000037405/ENSMUSG00000048612/ENSMUSG00000007655/ENSMUSG00000016918/ENSMUSG00000028599/ENSMUSG00000062960/ENSMUSG00000032562/ENSMUSG00000026509/ENSMUSG00000033161/ENSMUSG00000046718/ENSMUSG00000022892/ENSMUSG00000004044/ENSMUSG00000031841/ENSMUSG00000020122/ENSMUSG00000055980/ENSMUSG00000035441/ENSMUSG00000032412/…	Slc6a2/Tnfrsf1a/Plvap/Pdpn/Icam1/Myof/Cav1/Sulf1/Tnfrsf1b/Kdr/Gnai2/Capn2/Atp1a1/Bst2/App/Cavin1/Cdh13/Egfr/Irs1/Myo1d/Atp1b3/Prtn3/Abca1/Dll1/S100a10/Smo/Ptprc/Tlr2/Mlc1/Mal/Flot1/Rhoq/Serpinh1/Sdcbp/Fas/Stat6/Flot2/Fyn/Tlr4/Lypd6/Ahnak/Gprc5b/Tgfbr2/Gnai3/Slc2a3/Anxa2/Lrp8/Cd24a/Kcna5/Myadm/Ezr/Grk3/Lyn/Erbb2/Plcd1/Efnb1/Gnai1/Itgb1/Rtn4rl2/P2ry12/Rtn4rl1/Prkar1a/Myo1c/Fcer1g/Itpr1/Lamp2/Ptgs2/…	76
MF	GO:0050839	cell adhesion molecule binding	56|1421	208|16303	8.62786e-15	4.07235e-12	ENSMUSG00000037225/ENSMUSG00000020932/ENSMUSG00000067586/ENSMUSG00000037405/ENSMUSG00000031565/ENSMUSG00000019997/ENSMUSG00000027962/ENSMUSG00000038816/ENSMUSG00000025321/ENSMUSG00000028517/ENSMUSG00000000957/ENSMUSG00000001507/ENSMUSG00000022656/ENSMUSG00000062960/ENSMUSG00000031207/ENSMUSG00000017466/ENSMUSG00000030342/ENSMUSG00000028195/ENSMUSG00000015647/ENSMUSG00000021057/ENSMUSG00000006411/…	Fgf2/Gfap/S1pr3/Icam1/Fgfr1/Ctgf/Vcam1/Ctnnal1/Itgb8/Plpp3/Mmp14/Itga3/Nectin3/Kdr/Msn/Timp2/Cd9/Cyr61/Lama5/Akap5/Nectin4/Cdh13/Egfr/Fbn1/Itgav/Cdh11/Itgb2/Adgrl1/Sdcbp/Itga4/Fbln5/Pvr/Lcp1/Hmgb1/Lamb2/Ctnna2/Thbs1/Ptprd/Cd151/Ezr/Arvcf/Lyn/Ptprf/Ptpn6/Cx3cl1/Fn1/Vwf/Itgb1/Jam3/Cib2/Hmcn1/Jup/Cdh3/Emilin1/Mmp24/Igsf21	56
BP	GO:0050778	positive regulation of immune response	97|1439	494|16518	1.2734e-14	7.70972e-12	ENSMUSG00000073418/ENSMUSG00000030111/ENSMUSG00000023224/ENSMUSG00000035929/ENSMUSG00000061232/ENSMUSG00000037921/ENSMUSG00000060802/ENSMUSG00000020227/ENSMUSG00000030921/ENSMUSG00000073411/ENSMUSG00000007655/ENSMUSG00000036905/ENSMUSG00000058952/ENSMUSG00000020641/ENSMUSG00000036887/ENSMUSG00000046879/ENSMUSG00000022906/ENSMUSG00000069874/ENSMUSG00000026365/ENSMUSG00000036896/ENSMUSG00000057143/…	C4b/A2m/Serping1/H2-Q4/H2-K1/Ddx60/B2m/Irak3/Trim30a/H2-D1/Cav1/C1qb/Cfi/Rsad2/C1qa/Irgm1/Parp9/Irgm2/Cfh/C1qc/Trim12c/Il1r1/Ddx58/Ifih1/Tnfrsf21/H2-T23/Zc3hav1/Il33/Myb/Anxa1/Nlrc5/Irf1/C1ra/Gbp5/Ptprc/Tlr2/Il21/Flot1/Unc93b1/Slc11a1/Cacnb3/Wnt5a/Lag3/Stat6/Lgals9/Fyn/H2-M3/H2-Q6/Tgfb2/Tlr4/Pvr/Ptprj/Tril/Clcf1/Hmgb1/Gprc5b/P2rx7/Rab7b/Prkcb/Cd274/Nckap1l/Cyba/Tnip2/Cd24a/Plcg1/C3/H2-Ab1/Ezr/Cac…	97
BP	GO:0071346	cellular response to interferon-gamma	38|1439	108|16518	1.68135e-14	8.58822e-12	ENSMUSG00000028270/ENSMUSG00000040253/ENSMUSG00000029298/ENSMUSG00000026728/ENSMUSG00000028268/ENSMUSG00000024411/ENSMUSG00000046879/ENSMUSG00000022906/ENSMUSG00000069874/ENSMUSG00000034422/ENSMUSG00000104713/ENSMUSG00000074151/ENSMUSG00000023460/ENSMUSG00000018899/ENSMUSG00000026104/ENSMUSG00000024397/ENSMUSG00000105504/ENSMUSG00000025888/ENSMUSG00000076441/ENSMUSG00000027995/ENSMUSG00000041515/…	Gbp2/Gbp7/Gbp9/Vim/Gbp3/Aqp4/Irgm1/Parp9/Irgm2/Parp14/Gbp6/Nlrc5/Rab12/Irf1/Stat1/Aif1/Gbp5/Casp1/Ass1/Tlr2/Irf8/Wnt5a/Nmi/Tlr4/Zyx/Gbp4/Rab7b/Ccl2/H2-Ab1/Gsn/Cdc42ep4/H2-Q7/Ccl12/Cx3cl1/Myo1c/Dapk1/Ccl9/Flnb	38
BP	GO:0002237	response to molecule of bacterial origin	72|1439	316|16518	1.73372e-14	8.58822e-12	ENSMUSG00000028270/ENSMUSG00000026923/ENSMUSG00000060802/ENSMUSG00000052837/ENSMUSG00000020227/ENSMUSG00000026728/ENSMUSG00000027962/ENSMUSG00000024079/ENSMUSG00000032372/ENSMUSG00000028599/ENSMUSG00000052336/ENSMUSG00000069874/ENSMUSG00000002602/ENSMUSG00000020638/ENSMUSG00000104713/ENSMUSG00000018593/ENSMUSG00000044786/ENSMUSG00000028163/ENSMUSG00000034855/ENSMUSG00000021423/ENSMUSG00000028036/…	Gbp2/Notch1/B2m/Junb/Irak3/Vim/Vcam1/Eif2ak2/Plscr2/Tnfrsf1b/Cx3cr1/Irgm2/Axl/Cmpk2/Gbp6/Sparc/Zfp36/Nfkb1/Cxcl10/Ly86/Ptgfr/Nfkb2/Abca1/Mgst1/Trem2/Itgav/Irf5/Casp1/Ass1/Sbno2/Tlr2/Cited1/Irf8/Slc11a1/Wnt5a/Lgals9/H2-M3/Tlr4/Ggt1/Gng12/Cd180/P2rx7/Ccl2/Sash1/Trib1/Cd274/Cebpb/Tnip2/Cd24a/Lyn/Ccl12/Irak1/Myd88/Cx3cl1/Irak2/Stat5b/Abcc8/Dab2ip/Ccr5/Comt/Fgfr2/Tspo/Abr/Loxl1/Ptgs2/Abcg2/Mapkapk3/Ti…	72
MF	GO:0008201	heparin binding	42|1421	131|16303	2.95666e-14	9.30362e-12	ENSMUSG00000037225/ENSMUSG00000029718/ENSMUSG00000022893/ENSMUSG00000031565/ENSMUSG00000033327/ENSMUSG00000019997/ENSMUSG00000002985/ENSMUSG00000026365/ENSMUSG00000058897/ENSMUSG00000050069/ENSMUSG00000029838/ENSMUSG00000034855/ENSMUSG00000028195/ENSMUSG00000041577/ENSMUSG00000027712/ENSMUSG00000022892/ENSMUSG00000027204/ENSMUSG00000026837/ENSMUSG00000023885/ENSMUSG00000026395/ENSMUSG00000035258/…	Fgf2/Pcolce/Adamts1/Fgfr1/Tnxb/Ctgf/Apoe/Cfh/Col25a1/Grem2/Ptn/Cxcl10/Cyr61/Prelp/Anxa5/App/Fbn1/Col5a1/Thbs2/Ptprc/Abi3bp/Hmgb1/Ccl2/Fstl1/Thbs1/Tgfbr3/Adamts5/Ptprf/Sfrp1/Anxa6/Mdk/Fn1/Aplp1/Bmp4/Rtn4rl1/Col23a1/Anxa4/Slit2/Ndnf/Ang/Col11a1/Serpine2	42
BP	GO:0045765	regulation of angiogenesis	66|1439	278|16518	2.73934e-14	1.24389e-11	ENSMUSG00000037225/ENSMUSG00000004040/ENSMUSG00000026923/ENSMUSG00000030341/ENSMUSG00000064246/ENSMUSG00000022893/ENSMUSG00000024087/ENSMUSG00000021701/ENSMUSG00000016918/ENSMUSG00000030123/ENSMUSG00000030671/ENSMUSG00000052336/ENSMUSG00000023031/ENSMUSG00000025321/ENSMUSG00000034394/ENSMUSG00000062960/ENSMUSG00000046768/ENSMUSG00000018593/ENSMUSG00000032359/ENSMUSG00000024659/ENSMUSG00000029838/…	Fgf2/Stat3/Notch1/Tnfrsf1a/Chil1/Adamts1/Cyp1b1/Plk2/Sulf1/Plxnd1/Pde3b/Cx3cr1/Cela1/Itgb8/Lif/Kdr/Rhoj/Sparc/Ctsh/Anxa1/Ptn/Cxcl10/Stat1/S100a1/Adgra2/Card10/Hdac7/Dll1/Rapgef3/Gab1/Thbs2/Itgb2/Sema3e/Wnt5a/Tgfb2/Hmgb1/Tgfbr2/Ddah1/Isl1/Rock2/Ccl2/Prkcb/Sash1/Efna1/Thbs1/Plcg1/Adamts9/C3/Enpp2/Epha2/Sema6a/Cx3cl1/Itgb1/Abcc8/Dab2ip/Adam12/Tcf4/Cd34/Ptgs2/Sp100/Jup/Emilin1/Adgrb1/Col4a2/Hmox1/Rras	66
BP	GO:0030198	extracellular matrix organization	57|1439	220|16518	3.0109e-14	1.26203e-11	ENSMUSG00000020932/ENSMUSG00000053175/ENSMUSG00000026923/ENSMUSG00000030341/ENSMUSG00000028583/ENSMUSG00000038642/ENSMUSG00000031502/ENSMUSG00000024087/ENSMUSG00000033327/ENSMUSG00000019997/ENSMUSG00000016918/ENSMUSG00000003534/ENSMUSG00000028599/ENSMUSG00000034463/ENSMUSG00000048537/ENSMUSG00000026674/ENSMUSG00000029231/ENSMUSG00000020674/ENSMUSG00000058897/ENSMUSG00000028195/ENSMUSG00000022483/…	Gfap/Bcl3/Notch1/Tnfrsf1a/Pdpn/Ctss/Col4a1/Cyp1b1/Tnxb/Ctgf/Sulf1/Ddr1/Tnfrsf1b/Scara3/Phldb1/Ddr2/Pdgfra/Pxdn/Col25a1/Cyr61/Col2a1/Sulf2/App/Col4a6/Nfkb2/Loxl4/Sox9/Col5a1/Abi3bp/Flot1/Plod2/Serpinh1/Efemp2/Fbln5/Olfml2a/Tgfb2/Gfod2/Lcp1/Vit/Lamb2/Anxa2/Col15a1/Smad3/P3h1/Col4a5/Adamts9/Sh3pxd2b/Fn1/Itgb1/Csgalnact1/Col1a2/Col23a1/Emilin1/Ndnf/Col4a2/Col11a1/Antxr1	57
BP	GO:0050865	regulation of cell activation	92|1439	467|16518	5.13992e-14	2.00053e-11	ENSMUSG00000028583/ENSMUSG00000007655/ENSMUSG00000022508/ENSMUSG00000019997/ENSMUSG00000027962/ENSMUSG00000055447/ENSMUSG00000002985/ENSMUSG00000000957/ENSMUSG00000002602/ENSMUSG00000029231/ENSMUSG00000023915/ENSMUSG00000067212/ENSMUSG00000024810/ENSMUSG00000019982/ENSMUSG00000030342/ENSMUSG00000034957/ENSMUSG00000024659/ENSMUSG00000031596/ENSMUSG00000018899/ENSMUSG00000052920/ENSMUSG00000021756/…	Pdpn/Cav1/Bcl6/Ctgf/Vcam1/Cd47/Apoe/Mmp14/Axl/Pdgfra/Tnfrsf21/H2-T23/Il33/Myb/Cd9/Cebpa/Anxa1/Slc7a2/Irf1/Prkg1/Il6st/App/Aif1/Lgals3/Pdgfrb/Tox/Ptprc/Pde5a/Il21/Fas/Wnt5a/Lag3/Stat6/Lgals9/Flot2/H2-M3/Tlr4/Clcf1/Hmgb1/Plek/Mapk8ip1/Ptpre/Mertk/Tgfbr2/Ccl2/Cd274/Thbs1/Nckap1l/Rasal3/Cebpb/Tnip2/Lmo1/Cd24a/H2-Ab1/Zfp36l1/Gsn/Ccdc88b/Lyn/Erbb2/Lgals1/Sfrp1/Ptpn6/Ttbk1/Capn3/Abat/Myd88/Cx3cl1/Cd276/…	92
BP	GO:0031589	cell-substrate adhesion	70|1439	310|16518	6.47724e-14	2.35296e-11	ENSMUSG00000026923/ENSMUSG00000028583/ENSMUSG00000033327/ENSMUSG00000022508/ENSMUSG00000019997/ENSMUSG00000027962/ENSMUSG00000003534/ENSMUSG00000037736/ENSMUSG00000014599/ENSMUSG00000031328/ENSMUSG00000025321/ENSMUSG00000000957/ENSMUSG00000001507/ENSMUSG00000002602/ENSMUSG00000025351/ENSMUSG00000062960/ENSMUSG00000041498/ENSMUSG00000029838/ENSMUSG00000041075/ENSMUSG00000028195/ENSMUSG00000015647/…	Notch1/Pdpn/Tnxb/Bcl6/Ctgf/Vcam1/Ddr1/Limch1/Csf1/Flna/Itgb8/Mmp14/Itga3/Axl/Cd63/Kdr/Kif14/Ptn/Fzd7/Cyr61/Lama5/Cdh13/Dock1/Itgav/S100a10/Itgb2/Abi3bp/Nid2/Sema3e/Itga4/Ptprj/Ptprz1/Vit/Cdk6/Zyx/Mertk/Frem1/Efna1/Srcin1/Thbs1/Smad3/Adamts9/Myadm/Enpp2/Lgals1/Ajuba/Sfrp1/Fn1/Vwf/Itgb1/Dmtn/Ccl28/Sned1/Arhgap6/Cd34/Jam3/Emid1/Onecut2/Ajap1/Gcnt2/Ptprk/Jup/Itga6/Emilin1/Ndnf/Dbn1/Itgb5/Rsu1/Antxr1/…	70
CC	GO:0098589	membrane region	76|1463	362|16707	3.9783e-13	2.6743e-11	ENSMUSG00000055368/ENSMUSG00000030341/ENSMUSG00000034845/ENSMUSG00000028583/ENSMUSG00000037405/ENSMUSG00000048612/ENSMUSG00000007655/ENSMUSG00000016918/ENSMUSG00000028599/ENSMUSG00000062960/ENSMUSG00000032562/ENSMUSG00000026509/ENSMUSG00000033161/ENSMUSG00000046718/ENSMUSG00000022892/ENSMUSG00000004044/ENSMUSG00000031841/ENSMUSG00000020122/ENSMUSG00000055980/ENSMUSG00000035441/ENSMUSG00000032412/…	Slc6a2/Tnfrsf1a/Plvap/Pdpn/Icam1/Myof/Cav1/Sulf1/Tnfrsf1b/Kdr/Gnai2/Capn2/Atp1a1/Bst2/App/Cavin1/Cdh13/Egfr/Irs1/Myo1d/Atp1b3/Prtn3/Abca1/Dll1/S100a10/Smo/Ptprc/Tlr2/Mlc1/Mal/Flot1/Rhoq/Serpinh1/Sdcbp/Fas/Stat6/Flot2/Fyn/Tlr4/Lypd6/Ahnak/Gprc5b/Tgfbr2/Gnai3/Slc2a3/Anxa2/Lrp8/Cd24a/Kcna5/Myadm/Ezr/Grk3/Lyn/Erbb2/Plcd1/Efnb1/Gnai1/Itgb1/Rtn4rl2/P2ry12/Rtn4rl1/Prkar1a/Myo1c/Fcer1g/Itpr1/Lamp2/Ptgs2/…	76
BP	GO:1901342	regulation of vasculature development	69|1439	306|16518	1.0547e-13	3.59192e-11	ENSMUSG00000037225/ENSMUSG00000004040/ENSMUSG00000026923/ENSMUSG00000030341/ENSMUSG00000064246/ENSMUSG00000022893/ENSMUSG00000024087/ENSMUSG00000021701/ENSMUSG00000016918/ENSMUSG00000030123/ENSMUSG00000030671/ENSMUSG00000052336/ENSMUSG00000023031/ENSMUSG00000025321/ENSMUSG00000034394/ENSMUSG00000062960/ENSMUSG00000046768/ENSMUSG00000018593/ENSMUSG00000032359/ENSMUSG00000024659/ENSMUSG00000029838/…	Fgf2/Stat3/Notch1/Tnfrsf1a/Chil1/Adamts1/Cyp1b1/Plk2/Sulf1/Plxnd1/Pde3b/Cx3cr1/Cela1/Itgb8/Lif/Kdr/Rhoj/Sparc/Ctsh/Anxa1/Ptn/Cxcl10/Stat1/Hey2/S100a1/Adgra2/Card10/Hdac7/Dll1/Rapgef3/Gab1/Thbs2/Itgb2/Sema3e/Wnt5a/Tgfb2/Hmgb1/Tgfbr2/Ddah1/Isl1/Rock2/Ccl2/Prkcb/Sash1/Efna1/Thbs1/Plcg1/Adamts9/C3/Enpp2/Epha2/Sema6a/Cx3cl1/Itgb1/Abcc8/Dab2ip/Adam12/Tcf4/Bmp4/Cd34/Ptgs2/Efnb2/Sp100/Jup/Emilin1/Adgrb1/…	69
BP	GO:0043062	extracellular structure organization	62|1439	259|16518	1.12359e-13	3.60142e-11	ENSMUSG00000020932/ENSMUSG00000053175/ENSMUSG00000026923/ENSMUSG00000030341/ENSMUSG00000028583/ENSMUSG00000038642/ENSMUSG00000031502/ENSMUSG00000024087/ENSMUSG00000033327/ENSMUSG00000019997/ENSMUSG00000016918/ENSMUSG00000003534/ENSMUSG00000028599/ENSMUSG00000002985/ENSMUSG00000034463/ENSMUSG00000048537/ENSMUSG00000026674/ENSMUSG00000029231/ENSMUSG00000020674/ENSMUSG00000058897/ENSMUSG00000028195/…	Gfap/Bcl3/Notch1/Tnfrsf1a/Pdpn/Ctss/Col4a1/Cyp1b1/Tnxb/Ctgf/Sulf1/Ddr1/Tnfrsf1b/Apoe/Scara3/Phldb1/Ddr2/Pdgfra/Pxdn/Col25a1/Cyr61/Col2a1/Sulf2/App/Col4a6/Nfkb2/Loxl4/Sox9/Abca1/Col5a1/Abi3bp/Flot1/Plod2/Serpinh1/Sdcbp/Efemp2/Fbln5/Olfml2a/Tgfb2/Gfod2/Lcp1/Vit/Lamb2/Anxa2/Col15a1/Smad3/P3h1/Col4a5/Acsl3/Adamts9/Sh3pxd2b/Fn1/Itgb1/Csgalnact1/Cd34/Col1a2/Col23a1/Emilin1/Ndnf/Col4a2/Col11a1/Antxr1	62
BP	GO:0031349	positive regulation of defense response	66|1439	291|16518	2.73747e-13	8.28692e-11	ENSMUSG00000030341/ENSMUSG00000037921/ENSMUSG00000038642/ENSMUSG00000020227/ENSMUSG00000030921/ENSMUSG00000007655/ENSMUSG00000020641/ENSMUSG00000046879/ENSMUSG00000055447/ENSMUSG00000037820/ENSMUSG00000022906/ENSMUSG00000069874/ENSMUSG00000057143/ENSMUSG00000040296/ENSMUSG00000026896/ENSMUSG00000067212/ENSMUSG00000029826/ENSMUSG00000024810/ENSMUSG00000034957/ENSMUSG00000074151/ENSMUSG00000018899/…	Tnfrsf1a/Ddx60/Ctss/Irak3/Trim30a/Cav1/Rsad2/Irgm1/Cd47/Tgm2/Parp9/Irgm2/Trim12c/Ddx58/Ifih1/H2-T23/Zc3hav1/Il33/Cebpa/Nlrc5/Irf1/Egfr/Gbp5/Tlr2/Pde5a/Il21/Flot1/Il17ra/Unc93b1/Wnt5a/Lag3/Lgals9/H2-M3/Tlr4/Pvr/Tril/Hmgb1/Gprc5b/Rab7b/Cyba/Tnip2/Cd24a/C3/Lyn/Pik3ap1/Nod1/Irak1/Myd88/Cx3cl1/Irak2/Stat5b/Dab2ip/Ccr5/Fcer1g/Tmem173/Coch/Ptgs2/Vav1/Mapkapk3/Dhx58/Tirap/Stat5a/Pik3cg/Il17rc/Trim5/Cd86	66
CC	GO:0070161	anchoring junction	66|1463	303|16707	2.50497e-12	1.51551e-10	ENSMUSG00000026923/ENSMUSG00000036995/ENSMUSG00000007655/ENSMUSG00000025321/ENSMUSG00000022656/ENSMUSG00000026796/ENSMUSG00000031207/ENSMUSG00000050271/ENSMUSG00000006411/ENSMUSG00000031841/ENSMUSG00000027479/ENSMUSG00000014773/ENSMUSG00000027087/ENSMUSG00000031673/ENSMUSG00000026395/ENSMUSG00000059714/ENSMUSG00000037003/ENSMUSG00000026074/ENSMUSG00000028249/ENSMUSG00000011751/ENSMUSG00000061981/…	Notch1/Asap3/Cav1/Itgb8/Nectin3/Fam129b/Msn/Prag1/Nectin4/Cdh13/Mapre1/Dll1/Itgav/Cdh11/Ptprc/Flot1/Tns2/Map4k4/Sdcbp/Sptbn4/Flot2/Palld/Pard3b/Pvr/Trip6/Lcp1/Cd99l2/Sorbs2/Zyx/Oxtr/Ctnna2/Frmd4a/Kazn/Cyba/Lpp/Flrt3/Aif1l/Lin7b/Ezr/Gsn/Arvcf/Cdc42ep4/Lyn/Tle2/Epha2/Ajuba/Itgb1/Klf11/Limd1/Jam3/Cib2/Ajap1/Hmcn1/Cav2/Magi1/Jup/Cdh3/Itga6/Fblim1/Adgrb1/Hck/Perp/Rsu1/Igsf21/Lasp1/Flnb	66
BP	GO:0032496	response to lipopolysaccharide	67|1439	302|16518	5.42247e-13	1.55511e-10	ENSMUSG00000028270/ENSMUSG00000026923/ENSMUSG00000052837/ENSMUSG00000020227/ENSMUSG00000026728/ENSMUSG00000027962/ENSMUSG00000024079/ENSMUSG00000032372/ENSMUSG00000028599/ENSMUSG00000052336/ENSMUSG00000069874/ENSMUSG00000002602/ENSMUSG00000020638/ENSMUSG00000104713/ENSMUSG00000018593/ENSMUSG00000044786/ENSMUSG00000028163/ENSMUSG00000034855/ENSMUSG00000021423/ENSMUSG00000028036/ENSMUSG00000025225/…	Gbp2/Notch1/Junb/Irak3/Vim/Vcam1/Eif2ak2/Plscr2/Tnfrsf1b/Cx3cr1/Irgm2/Axl/Cmpk2/Gbp6/Sparc/Zfp36/Nfkb1/Cxcl10/Ly86/Ptgfr/Nfkb2/Abca1/Mgst1/Trem2/Casp1/Ass1/Sbno2/Tlr2/Cited1/Irf8/Slc11a1/Wnt5a/Lgals9/Tlr4/Ggt1/Gng12/Cd180/P2rx7/Ccl2/Sash1/Trib1/Cd274/Cebpb/Tnip2/Lyn/Ccl12/Irak1/Myd88/Cx3cl1/Irak2/Stat5b/Abcc8/Dab2ip/Ccr5/Comt/Fgfr2/Tspo/Abr/Loxl1/Ptgs2/Abcg2/Mapkapk3/Tirap/Arid5a/Litaf/Cd86/Pde4b	67
BP	GO:0006935	chemotaxis	92|1439	486|16518	5.87172e-13	1.59975e-10	ENSMUSG00000037225/ENSMUSG00000028635/ENSMUSG00000036030/ENSMUSG00000026923/ENSMUSG00000030077/ENSMUSG00000031565/ENSMUSG00000027962/ENSMUSG00000030123/ENSMUSG00000014599/ENSMUSG00000052336/ENSMUSG00000056427/ENSMUSG00000062960/ENSMUSG00000029231/ENSMUSG00000027168/ENSMUSG00000024659/ENSMUSG00000030669/ENSMUSG00000034855/ENSMUSG00000024621/ENSMUSG00000028195/ENSMUSG00000041120/ENSMUSG00000022892/…	Fgf2/Edn2/Prtg/Notch1/Chl1/Fgfr1/Vcam1/Plxnd1/Csf1/Cx3cr1/Slit3/Kdr/Pdgfra/Pax6/Anxa1/Calca/Cxcl10/Csf1r/Cyr61/Nbl1/App/Cdh13/Plxna2/Adgra2/Tubb2b/Agrn/Aif1/Ano6/Itgav/Lgals3/Gab1/Pdgfrb/Smo/Gas1/Flot1/Il17ra/Matn2/Sema3e/Wnt5a/Lgals9/Tgfb2/Palld/Ptprj/Nfib/Hmgb1/Lamb2/Isl1/Ccl2/Efna1/Arhgef5/Thbs1/Nckap1l/Plxna1/Smad3/Flrt3/Kif5a/Enpp2/Lyn/Epha2/Erbb2/Ccl12/Sema6a/Cx3cl1/Chn1/Efnb1/Fn1/Plxnb2/Bo…	92
BP	GO:0042330	taxis	92|1439	488|16518	7.50924e-13	1.94847e-10	ENSMUSG00000037225/ENSMUSG00000028635/ENSMUSG00000036030/ENSMUSG00000026923/ENSMUSG00000030077/ENSMUSG00000031565/ENSMUSG00000027962/ENSMUSG00000030123/ENSMUSG00000014599/ENSMUSG00000052336/ENSMUSG00000056427/ENSMUSG00000062960/ENSMUSG00000029231/ENSMUSG00000027168/ENSMUSG00000024659/ENSMUSG00000030669/ENSMUSG00000034855/ENSMUSG00000024621/ENSMUSG00000028195/ENSMUSG00000041120/ENSMUSG00000022892/…	Fgf2/Edn2/Prtg/Notch1/Chl1/Fgfr1/Vcam1/Plxnd1/Csf1/Cx3cr1/Slit3/Kdr/Pdgfra/Pax6/Anxa1/Calca/Cxcl10/Csf1r/Cyr61/Nbl1/App/Cdh13/Plxna2/Adgra2/Tubb2b/Agrn/Aif1/Ano6/Itgav/Lgals3/Gab1/Pdgfrb/Smo/Gas1/Flot1/Il17ra/Matn2/Sema3e/Wnt5a/Lgals9/Tgfb2/Palld/Ptprj/Nfib/Hmgb1/Lamb2/Isl1/Ccl2/Efna1/Arhgef5/Thbs1/Nckap1l/Plxna1/Smad3/Flrt3/Kif5a/Enpp2/Lyn/Epha2/Erbb2/Ccl12/Sema6a/Cx3cl1/Chn1/Efnb1/Fn1/Plxnb2/Bo…	92
CC	GO:0009897	external side of plasma membrane	64|1463	293|16707	4.73889e-12	2.60639e-10	ENSMUSG00000029338/ENSMUSG00000016763/ENSMUSG00000028583/ENSMUSG00000061232/ENSMUSG00000037405/ENSMUSG00000060802/ENSMUSG00000073411/ENSMUSG00000027962/ENSMUSG00000024411/ENSMUSG00000026980/ENSMUSG00000052336/ENSMUSG00000002985/ENSMUSG00000001507/ENSMUSG00000026072/ENSMUSG00000029231/ENSMUSG00000030342/ENSMUSG00000024659/ENSMUSG00000034855/ENSMUSG00000032135/ENSMUSG00000021756/ENSMUSG00000027712/…	Antxr2/Scube1/Pdpn/H2-K1/Icam1/B2m/H2-D1/Vcam1/Aqp4/Ly75/Cx3cr1/Apoe/Itga3/Il1r1/Pdgfra/Cd9/Anxa1/Cxcl10/Mcam/Il6st/Anxa5/Cdh13/Ghr/Adgra3/Ano1/Trf/Abca1/Folr1/Itgav/Ptprc/Flot1/Fas/Lag3/Cd33/H2-M3/Tlr4/P2rx7/Tgfbr2/Cd274/Thbs1/Adgre1/Cd24a/Tgfbr3/H2-Ab1/Cd276/Itgb1/Ccr5/Rtn4rl2/P2ry12/Cd34/Rtn4rl1/Cd248/Gpc4/Fcer1g/Map3k5/Tnfrsf22/Vsir/Il13ra1/Itga6/Ctsl/Igsf21/Serpine2/Antxr1/Cd86	64
CC	GO:0005912	adherens junction	63|1463	291|16707	1.04639e-11	5.27556e-10	ENSMUSG00000026923/ENSMUSG00000036995/ENSMUSG00000007655/ENSMUSG00000025321/ENSMUSG00000022656/ENSMUSG00000026796/ENSMUSG00000031207/ENSMUSG00000050271/ENSMUSG00000006411/ENSMUSG00000031841/ENSMUSG00000027479/ENSMUSG00000014773/ENSMUSG00000027087/ENSMUSG00000031673/ENSMUSG00000026395/ENSMUSG00000059714/ENSMUSG00000037003/ENSMUSG00000026074/ENSMUSG00000028249/ENSMUSG00000011751/ENSMUSG00000061981/…	Notch1/Asap3/Cav1/Itgb8/Nectin3/Fam129b/Msn/Prag1/Nectin4/Cdh13/Mapre1/Dll1/Itgav/Cdh11/Ptprc/Flot1/Tns2/Map4k4/Sdcbp/Sptbn4/Flot2/Palld/Pard3b/Pvr/Trip6/Lcp1/Cd99l2/Sorbs2/Zyx/Oxtr/Ctnna2/Frmd4a/Cyba/Lpp/Flrt3/Aif1l/Lin7b/Ezr/Gsn/Arvcf/Cdc42ep4/Lyn/Tle2/Epha2/Ajuba/Itgb1/Klf11/Limd1/Cib2/Ajap1/Hmcn1/Cav2/Magi1/Jup/Cdh3/Itga6/Fblim1/Adgrb1/Hck/Rsu1/Igsf21/Lasp1/Flnb	63
BP	GO:0022407	regulation of cell-cell adhesion	70|1439	333|16518	2.50195e-12	6.19688e-10	ENSMUSG00000005087/ENSMUSG00000028583/ENSMUSG00000022272/ENSMUSG00000037405/ENSMUSG00000007655/ENSMUSG00000022508/ENSMUSG00000027962/ENSMUSG00000055447/ENSMUSG00000028517/ENSMUSG00000023915/ENSMUSG00000067212/ENSMUSG00000019982/ENSMUSG00000030342/ENSMUSG00000024659/ENSMUSG00000018899/ENSMUSG00000052920/ENSMUSG00000021756/ENSMUSG00000024397/ENSMUSG00000076441/ENSMUSG00000026395/ENSMUSG00000053965/…	Cd44/Pdpn/Myo10/Icam1/Cav1/Bcl6/Vcam1/Cd47/Plpp3/Tnfrsf21/H2-T23/Myb/Cd9/Anxa1/Irf1/Prkg1/Il6st/Aif1/Ass1/Ptprc/Pde5a/Il21/Flot1/Itga4/Wnt5a/Lag3/Lgals9/Flot2/H2-M3/Hmgb1/Tgfbr2/Ccl2/Cd274/Nckap1l/Rasal3/Cebpb/Cd24a/Myadm/H2-Ab1/Ccdc88b/Lyn/Erbb2/Lgals1/Ptpn6/Abat/Cx3cl1/Cd276/Stat5b/Efnb1/Ccr5/Dmtn/Ccl28/Bmp4/Prkar1a/Zmiz1/Nrarp/Gcnt2/Vsir/Pag1/Zfp608/Efnb2/Fam49b/Itga6/Stat5a/Ripor2/Prkcq/Serpi…	70
MF	GO:0005201	extracellular matrix structural constituent	37|1421	119|16303	2.86256e-12	6.75564e-10	ENSMUSG00000031502/ENSMUSG00000033327/ENSMUSG00000020467/ENSMUSG00000023186/ENSMUSG00000034463/ENSMUSG00000020674/ENSMUSG00000058897/ENSMUSG00000018593/ENSMUSG00000041577/ENSMUSG00000022483/ENSMUSG00000015647/ENSMUSG00000031273/ENSMUSG00000038156/ENSMUSG00000041936/ENSMUSG00000027204/ENSMUSG00000001870/ENSMUSG00000026837/ENSMUSG00000035258/ENSMUSG00000021806/ENSMUSG00000022324/ENSMUSG00000024909/…	Col4a1/Tnxb/Efemp1/Vwa5a/Scara3/Pxdn/Col25a1/Sparc/Prelp/Col2a1/Lama5/Col4a6/Spon1/Agrn/Fbn1/Ltbp1/Col5a1/Abi3bp/Nid2/Matn2/Efemp2/Fbln5/Lamb2/Col15a1/Col4a5/Papln/Fn1/Emid1/Col1a2/Col23a1/Hmcn1/Lama1/Slit2/Emilin1/Igfbp6/Col4a2/Col11a1	37
BP	GO:0071706	tumor necrosis factor superfamily cytokine production	39|1439	131|16518	3.371e-12	7.98633e-10	ENSMUSG00000053175/ENSMUSG00000022037/ENSMUSG00000030341/ENSMUSG00000020227/ENSMUSG00000030921/ENSMUSG00000052336/ENSMUSG00000055447/ENSMUSG00000002602/ENSMUSG00000040296/ENSMUSG00000026896/ENSMUSG00000067212/ENSMUSG00000044786/ENSMUSG00000022892/ENSMUSG00000026395/ENSMUSG00000021994/ENSMUSG00000001123/ENSMUSG00000039005/ENSMUSG00000052914/ENSMUSG00000066551/ENSMUSG00000042258/ENSMUSG00000035385/…	Bcl3/Clu/Tnfrsf1a/Irak3/Trim30a/Cx3cr1/Cd47/Axl/Ddx58/Ifih1/H2-T23/Zfp36/App/Ptprc/Wnt5a/Lgals9/Tlr4/Cyp2j6/Hmgb1/Isl1/Ccl2/Cd274/Thbs1/Cyba/Cd24a/Nod1/Ptpn6/Myd88/Cx3cl1/Abcc8/Ccr5/Tspo/Cd34/Fcer1g/Vsir/Tirap/Arid5a/Nfatc4/Syt11	39
CC	GO:0015629	actin cytoskeleton	82|1463	438|16707	2.61329e-11	1.21619e-09	ENSMUSG00000041782/ENSMUSG00000026414/ENSMUSG00000031636/ENSMUSG00000025885/ENSMUSG00000028270/ENSMUSG00000022272/ENSMUSG00000068699/ENSMUSG00000020388/ENSMUSG00000027962/ENSMUSG00000053931/ENSMUSG00000037736/ENSMUSG00000049493/ENSMUSG00000031328/ENSMUSG00000043079/ENSMUSG00000026674/ENSMUSG00000040296/ENSMUSG00000024659/ENSMUSG00000064179/ENSMUSG00000032060/ENSMUSG00000029622/ENSMUSG00000035441/…	Lad1/Tnnt2/Pdlim3/Myo5b/Gbp2/Myo10/Flnc/Pdlim4/Vcam1/Cnn3/Limch1/Pls1/Flna/Synpo/Ddr2/Ddx58/Anxa1/Tnnt1/Cryab/Arpc1b/Myo1d/Cgn/Pkd2/Iqgap2/Aif1/Cnn2/Rapgef3/Flot1/Rhoq/Sptbn4/Samd14/Flot2/Fyn/Palld/Lcp1/Gng12/Ahnak/Zyx/Fyb/Arhgef5/Srcin1/Ctnna2/Tpm3/Cyba/Espn/Aif1l/Myadm/Ezr/Sh3pxd2b/Cgnl1/Gsn/Notch3/Cdc42ep4/Zfp185/Gas2l1/Ablim3/Pls3/Cobl/Dmtn/Arhgap6/Mtss1l/Sept9/Sept5/Onecut2/Cib2/Tpm4/Vangl2/…	82
BP	GO:0022409	positive regulation of cell-cell adhesion	50|1439	201|16518	5.97957e-12	1.35761e-09	ENSMUSG00000005087/ENSMUSG00000028583/ENSMUSG00000022272/ENSMUSG00000037405/ENSMUSG00000007655/ENSMUSG00000022508/ENSMUSG00000027962/ENSMUSG00000055447/ENSMUSG00000028517/ENSMUSG00000067212/ENSMUSG00000019982/ENSMUSG00000024659/ENSMUSG00000018899/ENSMUSG00000021756/ENSMUSG00000024397/ENSMUSG00000026395/ENSMUSG00000027718/ENSMUSG00000059714/ENSMUSG00000027009/ENSMUSG00000021994/ENSMUSG00000001123/…	Cd44/Pdpn/Myo10/Icam1/Cav1/Bcl6/Vcam1/Cd47/Plpp3/H2-T23/Myb/Anxa1/Irf1/Il6st/Aif1/Ptprc/Il21/Flot1/Itga4/Wnt5a/Lgals9/Flot2/H2-M3/Hmgb1/Tgfbr2/Ccl2/Cd274/Nckap1l/Rasal3/Cd24a/H2-Ab1/Ccdc88b/Lgals1/Cx3cl1/Cd276/Stat5b/Efnb1/Ccr5/Dmtn/Zmiz1/Gcnt2/Vsir/Efnb2/Fam49b/Itga6/Stat5a/Prkcq/Sox2/Piezo1/Cd86	50
BP	GO:0032640	tumor necrosis factor production	38|1439	128|16518	7.01425e-12	1.47002e-09	ENSMUSG00000053175/ENSMUSG00000022037/ENSMUSG00000030341/ENSMUSG00000020227/ENSMUSG00000030921/ENSMUSG00000052336/ENSMUSG00000055447/ENSMUSG00000002602/ENSMUSG00000040296/ENSMUSG00000026896/ENSMUSG00000067212/ENSMUSG00000044786/ENSMUSG00000022892/ENSMUSG00000026395/ENSMUSG00000021994/ENSMUSG00000001123/ENSMUSG00000039005/ENSMUSG00000052914/ENSMUSG00000066551/ENSMUSG00000042258/ENSMUSG00000035385/…	Bcl3/Clu/Tnfrsf1a/Irak3/Trim30a/Cx3cr1/Cd47/Axl/Ddx58/Ifih1/H2-T23/Zfp36/App/Ptprc/Wnt5a/Lgals9/Tlr4/Cyp2j6/Hmgb1/Isl1/Ccl2/Thbs1/Cyba/Cd24a/Nod1/Ptpn6/Myd88/Cx3cl1/Abcc8/Ccr5/Tspo/Cd34/Fcer1g/Vsir/Tirap/Arid5a/Nfatc4/Syt11	38
BP	GO:1903555	regulation of tumor necrosis factor superfamily cytokine production	38|1439	128|16518	7.01425e-12	1.47002e-09	ENSMUSG00000053175/ENSMUSG00000022037/ENSMUSG00000030341/ENSMUSG00000020227/ENSMUSG00000030921/ENSMUSG00000052336/ENSMUSG00000055447/ENSMUSG00000002602/ENSMUSG00000040296/ENSMUSG00000026896/ENSMUSG00000067212/ENSMUSG00000044786/ENSMUSG00000026395/ENSMUSG00000021994/ENSMUSG00000001123/ENSMUSG00000039005/ENSMUSG00000052914/ENSMUSG00000066551/ENSMUSG00000042258/ENSMUSG00000035385/ENSMUSG00000016496/…	Bcl3/Clu/Tnfrsf1a/Irak3/Trim30a/Cx3cr1/Cd47/Axl/Ddx58/Ifih1/H2-T23/Zfp36/Ptprc/Wnt5a/Lgals9/Tlr4/Cyp2j6/Hmgb1/Isl1/Ccl2/Cd274/Thbs1/Cyba/Cd24a/Nod1/Ptpn6/Myd88/Cx3cl1/Abcc8/Ccr5/Tspo/Cd34/Fcer1g/Vsir/Tirap/Arid5a/Nfatc4/Syt11	38
BP	GO:0050900	leukocyte migration	60|1439	271|16518	9.81135e-12	1.98008e-09	ENSMUSG00000028635/ENSMUSG00000034845/ENSMUSG00000037405/ENSMUSG00000027962/ENSMUSG00000014599/ENSMUSG00000052336/ENSMUSG00000000957/ENSMUSG00000031207/ENSMUSG00000026072/ENSMUSG00000024810/ENSMUSG00000024659/ENSMUSG00000030669/ENSMUSG00000034855/ENSMUSG00000041120/ENSMUSG00000022892/ENSMUSG00000057729/ENSMUSG00000024397/ENSMUSG00000064210/ENSMUSG00000050335/ENSMUSG00000000290/ENSMUSG00000002897/…	Edn2/Plvap/Icam1/Vcam1/Csf1/Cx3cr1/Mmp14/Msn/Il1r1/Il33/Anxa1/Calca/Cxcl10/Nbl1/App/Prtn3/Aif1/Ano6/Lgals3/Itgb2/Il17ra/Itga4/Wnt5a/Lgals9/Tgfb2/Ror2/Cd99l2/Hmgb1/Ccl2/Arhgef5/Nckap1l/Cd24a/Irak4/Gcnt1/Lyn/Ccl12/Myd88/Cx3cl1/Stat5b/Itgb1/Ccl28/P2ry12/Lrch1/Adora1/Abr/Cd34/Kitl/Jam3/Itga9/Fcer1g/Ccl9/Vav1/Slit2/Itga6/Emilin1/Ripor2/Slc8b1/Trpm4/Il17rc/Pde4b	60
BP	GO:0098542	defense response to other organism	78|1439	404|16518	1.29931e-11	2.52854e-09	ENSMUSG00000028270/ENSMUSG00000053175/ENSMUSG00000030341/ENSMUSG00000061232/ENSMUSG00000034459/ENSMUSG00000037921/ENSMUSG00000029561/ENSMUSG00000030921/ENSMUSG00000057596/ENSMUSG00000040253/ENSMUSG00000029298/ENSMUSG00000074896/ENSMUSG00000028268/ENSMUSG00000025492/ENSMUSG00000024079/ENSMUSG00000033355/ENSMUSG00000020641/ENSMUSG00000062488/ENSMUSG00000022906/ENSMUSG00000069874/ENSMUSG00000057143/…	Gbp2/Bcl3/Tnfrsf1a/H2-K1/Ifit1/Ddx60/Oasl2/Trim30a/Trim30d/Gbp7/Gbp9/Ifit3/Gbp3/Ifitm3/Eif2ak2/Rtp4/Rsad2/Ifit3b/Parp9/Irgm2/Trim12c/Ddx58/Isg15/Gbp6/Ifih1/H2-T23/Zc3hav1/Il33/Nlrc5/Cxcl10/Irf1/Stat1/Bst2/Slfn8/Irf5/Dtx3l/Ptprc/Tlr2/Il17ra/Irf8/Slc11a1/Trim12a/Lgals9/H2-M3/Tlr4/P2rx7/Gbp4/Oas1a/Cyba/Cebpb/Mr1/Oas2/Ccdc88b/Slfn9/Adamts5/Epha2/Nod1/Myd88/Mx2/Adamts4/Ighm/Stat2/Apobec1/Fcer1g/Tmem17…	78
BP	GO:0032680	regulation of tumor necrosis factor production	37|1439	126|16518	1.89442e-11	3.55954e-09	ENSMUSG00000053175/ENSMUSG00000022037/ENSMUSG00000030341/ENSMUSG00000020227/ENSMUSG00000030921/ENSMUSG00000052336/ENSMUSG00000055447/ENSMUSG00000002602/ENSMUSG00000040296/ENSMUSG00000026896/ENSMUSG00000067212/ENSMUSG00000044786/ENSMUSG00000026395/ENSMUSG00000021994/ENSMUSG00000001123/ENSMUSG00000039005/ENSMUSG00000052914/ENSMUSG00000066551/ENSMUSG00000042258/ENSMUSG00000035385/ENSMUSG00000040152/…	Bcl3/Clu/Tnfrsf1a/Irak3/Trim30a/Cx3cr1/Cd47/Axl/Ddx58/Ifih1/H2-T23/Zfp36/Ptprc/Wnt5a/Lgals9/Tlr4/Cyp2j6/Hmgb1/Isl1/Ccl2/Thbs1/Cyba/Cd24a/Nod1/Ptpn6/Myd88/Cx3cl1/Abcc8/Ccr5/Tspo/Cd34/Fcer1g/Vsir/Tirap/Arid5a/Nfatc4/Syt11	37
BP	GO:0019221	cytokine-mediated signaling pathway	65|1439	311|16518	1.99406e-11	3.62188e-09	ENSMUSG00000028635/ENSMUSG00000004040/ENSMUSG00000022146/ENSMUSG00000030341/ENSMUSG00000034845/ENSMUSG00000031805/ENSMUSG00000005087/ENSMUSG00000020227/ENSMUSG00000007655/ENSMUSG00000025492/ENSMUSG00000014599/ENSMUSG00000028599/ENSMUSG00000052336/ENSMUSG00000046879/ENSMUSG00000022906/ENSMUSG00000069874/ENSMUSG00000056427/ENSMUSG00000002602/ENSMUSG00000026072/ENSMUSG00000034422/ENSMUSG00000026204/…	Edn2/Stat3/Osmr/Tnfrsf1a/Plvap/Jak3/Cd44/Irak3/Cav1/Ifitm3/Csf1/Tnfrsf1b/Cx3cr1/Irgm1/Parp9/Irgm2/Slit3/Axl/Il1r1/Parp14/Ptprn/Grem2/Cebpa/Nlrc5/Cxcl10/Csf1r/Irf1/Stat1/Il6st/Rps6ka4/Ghr/Ackr1/Trem2/Irf5/Gab1/Casp1/Ptprc/Il17ra/Fas/Wnt5a/Stat6/Nmi/Ccl2/Tnip2/Cd24a/Irak4/Oas2/Ptprf/Ccl12/Irak1/Ptpn6/Myd88/Cx3cl1/Irak2/Stat5b/Ccr5/Stat2/Fcer1g/Ccl9/Il13ra1/Slit2/Stat5a/Il17rd/Il17rc/Ifnlr1	65
CC	GO:0016323	basolateral plasma membrane	51|1463	221|16707	8.77231e-11	3.79089e-09	ENSMUSG00000028583/ENSMUSG00000007655/ENSMUSG00000003534/ENSMUSG00000001507/ENSMUSG00000059336/ENSMUSG00000031207/ENSMUSG00000024659/ENSMUSG00000033161/ENSMUSG00000030737/ENSMUSG00000021057/ENSMUSG00000020122/ENSMUSG00000035441/ENSMUSG00000034462/ENSMUSG00000032554/ENSMUSG00000001827/ENSMUSG00000022469/ENSMUSG00000035805/ENSMUSG00000059714/ENSMUSG00000013275/ENSMUSG00000060961/ENSMUSG00000028631/…	Pdpn/Cav1/Ddr1/Itga3/Slc14a1/Msn/Anxa1/Atp1a1/Slco2b1/Akap5/Egfr/Myo1d/Pkd2/Trf/Folr1/Rapgef3/Mlc1/Flot1/Slc41a1/Slc4a4/Kcnq4/Flot2/Palm/Slc1a3/Anxa2/Ctnna2/Scn3a/Lin7b/Ezr/Abcc4/Slc26a7/Erbb2/Nod1/Lrp1/Heph/Aqp5/Entpd1/P2ry12/Adora1/Cd34/Rapgef4/Vangl2/Myo1c/Ajap1/Itga9/Slc4a10/Slc26a1/St14/Itga6/Pth1r/Bsnd	51
BP	GO:0001667	ameboidal-type cell migration	73|1439	372|16518	2.7014e-11	4.74836e-09	ENSMUSG00000037225/ENSMUSG00000026923/ENSMUSG00000031565/ENSMUSG00000024087/ENSMUSG00000021701/ENSMUSG00000030123/ENSMUSG00000002985/ENSMUSG00000001507/ENSMUSG00000025351/ENSMUSG00000062960/ENSMUSG00000026674/ENSMUSG00000046768/ENSMUSG00000018593/ENSMUSG00000032359/ENSMUSG00000027168/ENSMUSG00000024659/ENSMUSG00000015647/ENSMUSG00000031841/ENSMUSG00000031486/ENSMUSG00000058325/ENSMUSG00000028480/…	Fgf2/Notch1/Fgfr1/Cyp1b1/Plk2/Plxnd1/Apoe/Itga3/Cd63/Kdr/Ddr2/Rhoj/Sparc/Ctsh/Pax6/Anxa1/Lama5/Cdh13/Adgra2/Dock1/Glipr2/Card10/Kank2/Hdac7/Sox9/Folr1/Timp1/Itgav/Smo/Itgb2/Sema3e/Itga4/Wnt5a/Tgfb2/Acvr1/Hmgb1/Tgfbr2/Isl1/Rock2/Sash1/Efna1/Syde1/Thbs1/Plcg1/Adamts9/Enpp2/Epha2/Sema6a/Anxa6/Prr5l/Pfn2/Efnb1/Fn1/Itgb1/Dab2ip/Dmtn/Cygb/P2ry12/Bmp4/Kitl/Sema4g/Ptgs2/Efnb2/Sp100/Jup/Slit2/Adgrb1/Stat5…	73
BP	GO:0050808	synapse organization	71|1439	358|16518	3.05735e-11	5.2061e-09	ENSMUSG00000030309/ENSMUSG00000031502/ENSMUSG00000030123/ENSMUSG00000002985/ENSMUSG00000001507/ENSMUSG00000044716/ENSMUSG00000043079/ENSMUSG00000006435/ENSMUSG00000018593/ENSMUSG00000029838/ENSMUSG00000022892/ENSMUSG00000028184/ENSMUSG00000031517/ENSMUSG00000010066/ENSMUSG00000041936/ENSMUSG00000023885/ENSMUSG00000036295/ENSMUSG00000013033/ENSMUSG00000025555/ENSMUSG00000063531/ENSMUSG00000028249/…	Caprin2/Col4a1/Plxnd1/Apoe/Itga3/Dok7/Synpo/Neurl1a/Sparc/Ptn/App/Adgrl2/Gpm6a/Cacna2d2/Agrn/Thbs2/Lrrn3/Adgrl1/Farp1/Sema3e/Sdcbp/Cacnb3/Wnt5a/Fyn/Ntrk2/Palld/Palm/Lamb2/Shisa7/Oxtr/Efna1/Srcin1/Dmpk/Ctnna2/Lrp8/Mpp2/Flrt3/Col4a5/Ptprd/Cacna1a/Cacnb4/Ptprf/Erbb2/Shisa6/Sez6/Amigo1/Efnb1/Amigo2/Camk2b/Dab2ip/Camk1/Gap43/Rapgef4/Gpc4/Cux2/Ache/Pcdhb16/Slitrk5/Slc9a6/Efnb2/Lrfn4/Arc/Dbn1/Adgrb1/Unc…	71
BP	GO:0007159	leukocyte cell-cell adhesion	58|1439	267|16518	4.88376e-11	8.06413e-09	ENSMUSG00000005087/ENSMUSG00000037405/ENSMUSG00000007655/ENSMUSG00000022508/ENSMUSG00000027962/ENSMUSG00000052336/ENSMUSG00000055447/ENSMUSG00000031207/ENSMUSG00000023915/ENSMUSG00000067212/ENSMUSG00000019982/ENSMUSG00000024659/ENSMUSG00000018899/ENSMUSG00000021756/ENSMUSG00000024397/ENSMUSG00000076441/ENSMUSG00000026395/ENSMUSG00000000290/ENSMUSG00000053965/ENSMUSG00000027718/ENSMUSG00000027009/…	Cd44/Icam1/Cav1/Bcl6/Vcam1/Cx3cr1/Cd47/Msn/Tnfrsf21/H2-T23/Myb/Anxa1/Irf1/Il6st/Aif1/Ass1/Ptprc/Itgb2/Pde5a/Il21/Itga4/Lag3/Lgals9/Flot2/H2-M3/Hmgb1/Tgfbr2/Ccl2/Cd274/Nckap1l/Rasal3/Cebpb/Cd24a/H2-Ab1/Ezr/Gcnt1/Ccdc88b/Erbb2/Lgals1/Ptpn6/Cd276/Stat5b/Efnb1/Itgb1/Ccl28/Bmp4/Prkar1a/Zmiz1/Nrarp/Vsir/Pag1/Zfp608/Efnb2/Fam49b/Stat5a/Ripor2/Prkcq/Cd86	58
CC	GO:0030175	filopodium	31|1463	100|16707	2.03604e-10	8.21202e-09	ENSMUSG00000028583/ENSMUSG00000022272/ENSMUSG00000027962/ENSMUSG00000001507/ENSMUSG00000031207/ENSMUSG00000029822/ENSMUSG00000021057/ENSMUSG00000022892/ENSMUSG00000031486/ENSMUSG00000031517/ENSMUSG00000021676/ENSMUSG00000022469/ENSMUSG00000027087/ENSMUSG00000025555/ENSMUSG00000060703/ENSMUSG00000058056/ENSMUSG00000021998/ENSMUSG00000068748/ENSMUSG00000035863/ENSMUSG00000038453/ENSMUSG00000052397/…	Pdpn/Myo10/Vcam1/Itga3/Msn/Osbpl3/Akap5/App/Adgra2/Gpm6a/Iqgap2/Rapgef3/Itgav/Farp1/Cd302/Palld/Lcp1/Ptprz1/Palm/Srcin1/Ezr/Arl4c/Itgb1/Gap43/Kitl/Itga6/Dbn1/Ripor2/Antxr1/Fat1/Inppl1	31
CC	GO:0031252	cell leading edge	74|1463	396|16707	2.7087e-10	1.02423e-08	ENSMUSG00000026923/ENSMUSG00000036995/ENSMUSG00000005087/ENSMUSG00000028583/ENSMUSG00000022272/ENSMUSG00000026728/ENSMUSG00000001025/ENSMUSG00000020388/ENSMUSG00000030123/ENSMUSG00000043850/ENSMUSG00000040296/ENSMUSG00000021057/ENSMUSG00000022892/ENSMUSG00000015968/ENSMUSG00000035441/ENSMUSG00000034462/ENSMUSG00000034573/ENSMUSG00000021676/ENSMUSG00000024397/ENSMUSG00000040479/ENSMUSG00000022469/…	Notch1/Asap3/Cd44/Pdpn/Myo10/Vim/S100a6/Pdlim4/Plxnd1/Clrn1/Ddx58/Akap5/App/Cacna1d/Myo1d/Pkd2/Ptpn13/Iqgap2/Aif1/Dgkz/Rapgef3/Itgav/Flot1/Flot2/Palld/Lcp1/Ptprz1/Cdk6/Sorbs2/Plek/Palm/Shisa7/Wwc1/S100a11/Gria1/Srcin1/Anxa2/Ctnna2/Lamp5/Mpp2/Plcg1/Aif1l/Myadm/Ezr/Wls/Gsn/Epha2/Ajuba/Stmn2/Shisa6/Ablim3/Cobl/Itgb1/Plekha1/Adora1/Mtss1l/Sgce/Kitl/Gabra1/Myo1c/Gabrg2/S100b/Plekhh2/Ptprk/Shisa8/Arpin…	74
BP	GO:0042110	T cell activation	75|1439	394|16518	6.52066e-11	1.04195e-08	ENSMUSG00000004040/ENSMUSG00000053175/ENSMUSG00000037405/ENSMUSG00000060802/ENSMUSG00000007655/ENSMUSG00000022508/ENSMUSG00000027962/ENSMUSG00000020641/ENSMUSG00000055447/ENSMUSG00000031207/ENSMUSG00000023915/ENSMUSG00000067212/ENSMUSG00000019982/ENSMUSG00000024659/ENSMUSG00000041075/ENSMUSG00000018899/ENSMUSG00000002799/ENSMUSG00000021756/ENSMUSG00000024397/ENSMUSG00000027087/ENSMUSG00000050335/…	Stat3/Bcl3/Icam1/B2m/Cav1/Bcl6/Vcam1/Rsad2/Cd47/Msn/Tnfrsf21/H2-T23/Myb/Anxa1/Fzd7/Irf1/Jag2/Il6st/Aif1/Itgav/Lgals3/Ptprc/Pde5a/Il21/Slc11a1/Fas/Lag3/Stat6/Lgals9/Flot2/Fyn/H2-M3/Lcp1/Cdk6/Hmgb1/Mapk8ip1/P2rx7/Tgfbr2/Ccl2/Lfng/Cd274/Nckap1l/Rasal3/Cebpb/Smad3/Lmo1/Cd24a/Cd151/H2-Ab1/Zfp36l1/Gsn/Ccdc88b/Erbb2/Lgals1/Ptpn6/Cd276/Stat5b/Efnb1/Bmp4/Dock2/Prkar1a/Zmiz1/Fcer1g/Nrarp/Vsir/Pag1/Zfp608/E…	75
BP	GO:0001819	positive regulation of cytokine production	71|1439	364|16518	6.75912e-11	1.04195e-08	ENSMUSG00000053175/ENSMUSG00000022037/ENSMUSG00000030341/ENSMUSG00000037921/ENSMUSG00000060802/ENSMUSG00000024087/ENSMUSG00000024079/ENSMUSG00000016918/ENSMUSG00000020641/ENSMUSG00000026072/ENSMUSG00000040296/ENSMUSG00000026896/ENSMUSG00000067212/ENSMUSG00000029826/ENSMUSG00000024810/ENSMUSG00000019982/ENSMUSG00000024659/ENSMUSG00000024621/ENSMUSG00000018899/ENSMUSG00000026104/ENSMUSG00000006800/…	Bcl3/Clu/Tnfrsf1a/Ddx60/B2m/Cyp1b1/Eif2ak2/Sulf1/Rsad2/Il1r1/Ddx58/Ifih1/H2-T23/Zc3hav1/Il33/Myb/Anxa1/Csf1r/Irf1/Stat1/Sulf2/Gbp5/Casp1/Ptprc/Tlr2/Il21/Flot1/Il17ra/Irf8/Slc11a1/Wnt5a/Lgals9/H2-M3/Tlr4/Cyp2j6/Hmgb1/Runx1/Gprc5b/P2rx7/Isl1/Rab7b/Ccl2/Cd274/Thbs1/Cyba/Cebpb/Smad3/C3/Ccdc88b/Nod1/Cd300c2/Irak1/Myd88/Cx3cl1/Cd276/Stat5b/Abcc8/Ccr5/Cd34/Fcer1g/Tmem173/Ptgs2/Fam49b/Dhx58/Tirap/Stat5a/…	71
BP	GO:0045089	positive regulation of innate immune response	47|1439	194|16518	6.88385e-11	1.04195e-08	ENSMUSG00000037921/ENSMUSG00000020227/ENSMUSG00000030921/ENSMUSG00000007655/ENSMUSG00000020641/ENSMUSG00000046879/ENSMUSG00000022906/ENSMUSG00000069874/ENSMUSG00000057143/ENSMUSG00000040296/ENSMUSG00000026896/ENSMUSG00000067212/ENSMUSG00000029826/ENSMUSG00000074151/ENSMUSG00000018899/ENSMUSG00000105504/ENSMUSG00000027995/ENSMUSG00000027718/ENSMUSG00000059714/ENSMUSG00000036908/ENSMUSG00000021994/…	Ddx60/Irak3/Trim30a/Cav1/Rsad2/Irgm1/Parp9/Irgm2/Trim12c/Ddx58/Ifih1/H2-T23/Zc3hav1/Nlrc5/Irf1/Gbp5/Tlr2/Il21/Flot1/Unc93b1/Wnt5a/Lag3/Lgals9/H2-M3/Tlr4/Pvr/Tril/Hmgb1/Rab7b/Cyba/Tnip2/Lyn/Pik3ap1/Irak1/Myd88/Irak2/Stat5b/Dab2ip/Tmem173/Coch/Vav1/Mapkapk3/Dhx58/Tirap/Stat5a/Trim5/Cd86	47
BP	GO:1905114	cell surface receptor signaling pathway involved in cell-cell signaling	85|1439	473|16518	7.656e-11	1.1275e-08	ENSMUSG00000037225/ENSMUSG00000026923/ENSMUSG00000030309/ENSMUSG00000035200/ENSMUSG00000007655/ENSMUSG00000020393/ENSMUSG00000016918/ENSMUSG00000023031/ENSMUSG00000002985/ENSMUSG00000028517/ENSMUSG00000001507/ENSMUSG00000002602/ENSMUSG00000027803/ENSMUSG00000028163/ENSMUSG00000041075/ENSMUSG00000021182/ENSMUSG00000044674/ENSMUSG00000006800/ENSMUSG00000022892/ENSMUSG00000032280/ENSMUSG00000020122/…	Fgf2/Notch1/Caprin2/Chrnb4/Cav1/Kremen1/Sulf1/Cela1/Apoe/Plpp3/Itga3/Axl/Wwtr1/Nfkb1/Fzd7/Ccdc88c/Fzd1/Sulf2/App/Tle3/Egfr/Rnf213/Sox9/Folr1/Grik2/Six3/Nxn/Lgr5/Smo/Tlr2/Ankrd6/Ptk7/Cacnb3/Wnt5a/Cdk14/Ror2/Gprc5b/Mertk/P2rx7/Frzb/Isl1/Dmpk/Thra/Insyn1/Smad3/Mpp2/Dkk3/C3/Wls/Mdfic/Dact3/Yap1/Tle2/Sfrp1/Shisa6/Bcl9l/Abat/Cx3cl1/Sez6/Arl6/Dab2ip/Limd1/Adora1/Rgs4/Bmp4/Tcf7l1/Cux2/Tle1/Vangl2/Nrarp/T…	85
BP	GO:0010001	glial cell differentiation	48|1439	202|16518	8.91874e-11	1.2789e-08	ENSMUSG00000037225/ENSMUSG00000004040/ENSMUSG00000020932/ENSMUSG00000026923/ENSMUSG00000022037/ENSMUSG00000026728/ENSMUSG00000034394/ENSMUSG00000028517/ENSMUSG00000023915/ENSMUSG00000030342/ENSMUSG00000027168/ENSMUSG00000021756/ENSMUSG00000022892/ENSMUSG00000020122/ENSMUSG00000000567/ENSMUSG00000014773/ENSMUSG00000036560/ENSMUSG00000001761/ENSMUSG00000027995/ENSMUSG00000039116/ENSMUSG00000017167/…	Fgf2/Stat3/Gfap/Notch1/Clu/Vim/Lif/Plpp3/Tnfrsf21/Cd9/Pax6/Il6st/App/Egfr/Sox9/Dll1/Lgi4/Smo/Tlr2/Adgrg6/Cntnap1/Ntrk2/Tlr4/Nfib/Ror2/Ptprz1/Clcf1/Lamb2/Nfix/Arhgef10/Neurod4/Mxra8/Sox6/Enpp2/Gsn/Lyn/Erbb2/Lrp1/Ttbk1/Bmp4/Gpr157/Gap43/Lingo1/Id4/S100b/Mmp24/Serpine2/Dab1	48
BP	GO:0002009	morphogenesis of an epithelium	83|1439	459|16518	9.32463e-11	1.30282e-08	ENSMUSG00000037225/ENSMUSG00000026923/ENSMUSG00000053113/ENSMUSG00000005087/ENSMUSG00000028583/ENSMUSG00000031502/ENSMUSG00000031565/ENSMUSG00000016918/ENSMUSG00000003534/ENSMUSG00000030123/ENSMUSG00000014599/ENSMUSG00000031328/ENSMUSG00000037820/ENSMUSG00000034394/ENSMUSG00000000957/ENSMUSG00000070509/ENSMUSG00000031207/ENSMUSG00000029231/ENSMUSG00000053279/ENSMUSG00000071350/ENSMUSG00000032359/…	Fgf2/Notch1/Socs3/Cd44/Pdpn/Col4a1/Fgfr1/Sulf1/Ddr1/Plxnd1/Csf1/Flna/Tgm2/Lif/Mmp14/Rgma/Msn/Pdgfra/Aldh1a1/Setdb2/Ctsh/Rdh10/Igfbp5/Cxcl10/Cyr61/Jag2/Fzd1/Lama5/Spry1/Egfr/Pkd2/Sox9/Folr1/Dll1/Rhoc/Lgr5/Smo/Col5a1/Cited1/Ankrd6/Ptk7/Tulp3/Sema3e/Wnt5a/Tgfb2/Acvr1/Ror2/Tgfbr2/Frzb/Tead2/Plxna1/Smad3/Flrt3/Cd151/Yap1/Epha2/Ajuba/Sfrp1/Ift57/Plxnb2/Cobl/Tmeff2/Bmp4/Prkacb/Fat4/Vangl2/Ajap1/Nrarp/St…	83
BP	GO:0018212	peptidyl-tyrosine modification	68|1439	346|16518	1.21738e-10	1.65837e-08	ENSMUSG00000053113/ENSMUSG00000030341/ENSMUSG00000031805/ENSMUSG00000005087/ENSMUSG00000037405/ENSMUSG00000031565/ENSMUSG00000007655/ENSMUSG00000024079/ENSMUSG00000003534/ENSMUSG00000020467/ENSMUSG00000034394/ENSMUSG00000022906/ENSMUSG00000028517/ENSMUSG00000044716/ENSMUSG00000002602/ENSMUSG00000062960/ENSMUSG00000026674/ENSMUSG00000029231/ENSMUSG00000034422/ENSMUSG00000006435/ENSMUSG00000024621/…	Socs3/Tnfrsf1a/Jak3/Cd44/Icam1/Fgfr1/Cav1/Eif2ak2/Ddr1/Efemp1/Lif/Parp9/Plpp3/Dok7/Axl/Kdr/Ddr2/Pdgfra/Parp14/Neurl1a/Csf1r/Irf1/Il6st/App/Ghr/Egfr/Agrn/Trem2/Pdgfrb/Ptprc/Il21/Ptk7/Insrr/Fyn/Ntrk2/Tlr4/Ror2/Ptprz1/Clcf1/Gprc5b/Mertk/Isl1/Inpp5f/Efna1/Srcin1/Lrp8/Ptpn1/Cd24a/Mvp/Enpp2/Lyn/Epha2/Erbb2/Sfrp1/Ptpn6/Ttbk1/Efnb1/Itgb1/Dmtn/Adora1/Fgfr2/Kitl/Ttl/Cav2/Efnb2/Stat5a/Hck/Zfyve28	68
BP	GO:0050867	positive regulation of cell activation	58|1439	275|16518	1.67221e-10	2.22241e-08	ENSMUSG00000028583/ENSMUSG00000007655/ENSMUSG00000022508/ENSMUSG00000019997/ENSMUSG00000027962/ENSMUSG00000055447/ENSMUSG00000000957/ENSMUSG00000002602/ENSMUSG00000067212/ENSMUSG00000024810/ENSMUSG00000019982/ENSMUSG00000034957/ENSMUSG00000024659/ENSMUSG00000018899/ENSMUSG00000021756/ENSMUSG00000022892/ENSMUSG00000024397/ENSMUSG00000024620/ENSMUSG00000041272/ENSMUSG00000026395/ENSMUSG00000027718/…	Pdpn/Cav1/Bcl6/Ctgf/Vcam1/Cd47/Mmp14/Axl/H2-T23/Il33/Myb/Cebpa/Anxa1/Irf1/Il6st/App/Aif1/Pdgfrb/Tox/Ptprc/Il21/Wnt5a/Stat6/Lgals9/Flot2/H2-M3/Tlr4/Clcf1/Hmgb1/Plek/Tgfbr2/Ccl2/Cd274/Thbs1/Nckap1l/Rasal3/Tnip2/Cd24a/H2-Ab1/Ccdc88b/Lgals1/Ttbk1/Capn3/Myd88/Cd276/Stat5b/Efnb1/Dmtn/Zmiz1/Fcer1g/Vsir/Rps6ka1/Efnb2/Fam49b/Cdkn1a/Stat5a/Prkcq/Cd86	58
BP	GO:0001503	ossification	65|1439	327|16518	1.90452e-10	2.47089e-08	ENSMUSG00000037225/ENSMUSG00000071637/ENSMUSG00000026923/ENSMUSG00000052837/ENSMUSG00000031565/ENSMUSG00000020393/ENSMUSG00000019997/ENSMUSG00000020641/ENSMUSG00000022098/ENSMUSG00000014599/ENSMUSG00000000957/ENSMUSG00000027803/ENSMUSG00000026674/ENSMUSG00000035692/ENSMUSG00000018593/ENSMUSG00000034957/ENSMUSG00000029838/ENSMUSG00000030669/ENSMUSG00000026185/ENSMUSG00000028195/ENSMUSG00000007041/…	Fgf2/Cebpd/Notch1/Junb/Fgfr1/Kremen1/Ctgf/Rsad2/Bmp1/Csf1/Mmp14/Wwtr1/Ddr2/Isg15/Sparc/Cebpa/Ptn/Calca/Igfbp5/Cyr61/Clic1/Chrdl1/Col2a1/Fzd1/Il6st/Klf10/Hdac7/Sox9/Ano6/Smo/Npr2/Sbno2/Cited1/Wnt5a/Tgfb2/Acvr1/Ror2/Cdk6/P2rx7/Lmna/Thra/Cebpb/Smad3/P3h1/Sh3pxd2b/Epha2/Sfrp1/Cd276/Limd1/Csgalnact1/Igsf10/Bmp4/Fat4/Ache/Id4/Ptgs2/Tmem119/Pth1r/Rassf2/Gdpd2/Col11a1/Trpm4/Sox2/Inppl1/Lrp5	65
BP	GO:0045088	regulation of innate immune response	52|1439	234|16518	2.05519e-10	2.60435e-08	ENSMUSG00000030111/ENSMUSG00000023224/ENSMUSG00000037921/ENSMUSG00000020227/ENSMUSG00000030921/ENSMUSG00000007655/ENSMUSG00000020641/ENSMUSG00000046879/ENSMUSG00000022906/ENSMUSG00000069874/ENSMUSG00000057143/ENSMUSG00000034422/ENSMUSG00000040296/ENSMUSG00000026896/ENSMUSG00000067212/ENSMUSG00000029826/ENSMUSG00000074151/ENSMUSG00000018899/ENSMUSG00000105504/ENSMUSG00000027995/ENSMUSG00000027718/…	A2m/Serping1/Ddx60/Irak3/Trim30a/Cav1/Rsad2/Irgm1/Parp9/Irgm2/Trim12c/Parp14/Ddx58/Ifih1/H2-T23/Zc3hav1/Nlrc5/Irf1/Gbp5/Tlr2/Il21/Flot1/Unc93b1/Tap1/Wnt5a/Lag3/Lgals9/Nmi/H2-M3/Tlr4/Pvr/Tril/Hmgb1/Rab7b/Cyba/Tnip2/Lyn/Pik3ap1/Irak1/Myd88/Irak2/Stat5b/Dab2ip/Tmem173/Coch/Vav1/Mapkapk3/Dhx58/Tirap/Stat5a/Trim5/Cd86	52
BP	GO:0018108	peptidyl-tyrosine phosphorylation	67|1439	343|16518	2.19486e-10	2.71813e-08	ENSMUSG00000053113/ENSMUSG00000030341/ENSMUSG00000031805/ENSMUSG00000005087/ENSMUSG00000037405/ENSMUSG00000031565/ENSMUSG00000007655/ENSMUSG00000024079/ENSMUSG00000003534/ENSMUSG00000020467/ENSMUSG00000034394/ENSMUSG00000022906/ENSMUSG00000028517/ENSMUSG00000044716/ENSMUSG00000002602/ENSMUSG00000062960/ENSMUSG00000026674/ENSMUSG00000029231/ENSMUSG00000034422/ENSMUSG00000006435/ENSMUSG00000024621/…	Socs3/Tnfrsf1a/Jak3/Cd44/Icam1/Fgfr1/Cav1/Eif2ak2/Ddr1/Efemp1/Lif/Parp9/Plpp3/Dok7/Axl/Kdr/Ddr2/Pdgfra/Parp14/Neurl1a/Csf1r/Irf1/Il6st/App/Ghr/Egfr/Agrn/Trem2/Pdgfrb/Ptprc/Il21/Ptk7/Insrr/Fyn/Ntrk2/Tlr4/Ror2/Ptprz1/Clcf1/Gprc5b/Mertk/Isl1/Inpp5f/Efna1/Srcin1/Lrp8/Ptpn1/Cd24a/Mvp/Enpp2/Lyn/Epha2/Erbb2/Sfrp1/Ptpn6/Ttbk1/Efnb1/Itgb1/Dmtn/Adora1/Fgfr2/Kitl/Cav2/Efnb2/Stat5a/Hck/Zfyve28	67
BP	GO:0022604	regulation of cell morphogenesis	84|1439	476|16518	2.53597e-10	3.07078e-08	ENSMUSG00000005087/ENSMUSG00000028583/ENSMUSG00000030309/ENSMUSG00000022272/ENSMUSG00000037405/ENSMUSG00000026728/ENSMUSG00000030123/ENSMUSG00000031328/ENSMUSG00000002985/ENSMUSG00000070509/ENSMUSG00000062960/ENSMUSG00000031207/ENSMUSG00000046768/ENSMUSG00000050271/ENSMUSG00000018593/ENSMUSG00000024659/ENSMUSG00000029838/ENSMUSG00000024621/ENSMUSG00000001313/ENSMUSG00000021057/ENSMUSG00000026640/…	Cd44/Pdpn/Caprin2/Myo10/Icam1/Vim/Plxnd1/Flna/Apoe/Rgma/Kdr/Msn/Rhoj/Prag1/Sparc/Anxa1/Ptn/Csf1r/Rnd2/Akap5/Plxna2/Nin/Dock1/Tubb2b/Agrn/Ssh3/Rhoc/S100a10/Olfm1/Rhoq/Hexb/Sema3e/Wnt5a/Fyn/Ntrk2/Mgll/Ptprz1/Fmnl2/Palm/Rnd3/Ccl2/Efna1/Srcin1/Lrp8/Plxna1/Ptprd/Myadm/Ezr/Enpp2/Cacna1a/Cdc42ep4/Ptprf/Cul7/Ccl12/Sema6a/Bcl9l/Trim46/Chn1/Amigo1/Fn1/Plxnb2/Camk2b/Ccr5/Dmtn/Limd1/Cdc42se1/Rims1/Cux2/Ache/…	84
BP	GO:0061564	axon development	79|1439	438|16518	3.02921e-10	3.5883e-08	ENSMUSG00000036030/ENSMUSG00000026923/ENSMUSG00000030077/ENSMUSG00000026728/ENSMUSG00000003534/ENSMUSG00000030123/ENSMUSG00000002985/ENSMUSG00000056427/ENSMUSG00000070509/ENSMUSG00000058897/ENSMUSG00000027168/ENSMUSG00000024621/ENSMUSG00000001313/ENSMUSG00000022892/ENSMUSG00000026640/ENSMUSG00000021068/ENSMUSG00000045136/ENSMUSG00000041936/ENSMUSG00000034616/ENSMUSG00000001827/ENSMUSG00000001761/…	Prtg/Notch1/Chl1/Vim/Ddr1/Plxnd1/Apoe/Slit3/Rgma/Col25a1/Pax6/Csf1r/Rnd2/App/Plxna2/Nin/Tubb2b/Agrn/Ssh3/Folr1/Smo/Cdh11/Olfm1/Gas1/Dock7/Flot1/Matn2/Sema3e/Sptbn4/Itga4/Wnt5a/Ntrk2/Tgfb2/Mgll/Palld/Nfib/Ptprz1/Lamb2/Isl1/Inpp5f/Efna1/Ctnna2/Nrep/Plxna1/Flrt3/Kif5a/Crtac1/Cacna1a/Ptprf/Erbb2/Sema6a/Trim46/Chn1/Amigo1/Efnb1/Fn1/Plxnb2/Cobl/Itgb1/Boc/Ccr5/Rtn4rl2/Tspo/Rtn4rl1/Gap43/Jam3/Vangl2/Ache…	79
BP	GO:0002683	negative regulation of immune system process	75|1439	408|16518	3.51702e-10	4.0775e-08	ENSMUSG00000030111/ENSMUSG00000023224/ENSMUSG00000026923/ENSMUSG00000020227/ENSMUSG00000023367/ENSMUSG00000030921/ENSMUSG00000022508/ENSMUSG00000029810/ENSMUSG00000002602/ENSMUSG00000036896/ENSMUSG00000034422/ENSMUSG00000023915/ENSMUSG00000067212/ENSMUSG00000044786/ENSMUSG00000024810/ENSMUSG00000024659/ENSMUSG00000074151/ENSMUSG00000018899/ENSMUSG00000046718/ENSMUSG00000041120/ENSMUSG00000000567/…	A2m/Serping1/Notch1/Irak3/Tmem176a/Trim30a/Bcl6/Tmem176b/Axl/C1qc/Parp14/Tnfrsf21/H2-T23/Zfp36/Il33/Anxa1/Nlrc5/Irf1/Bst2/Nbl1/Sox9/Fbn1/Dll1/Ptprc/Pde5a/Tap1/Fas/Lag3/Stat6/Lgals9/Nmi/H2-M3/Tgfb2/Ptprj/Cdk6/Hmgb1/Mertk/Rab7b/Trib1/Cd274/Thbs1/Cebpb/Cd24a/H2-Ab1/Ezr/Zfp36l1/Lyn/Erbb2/Ccl12/Sfrp1/Ptpn6/Gas2l1/Cx3cl1/Cd276/Stat5b/Dab2ip/Ccl28/Lrch1/Adora1/Bmp4/Abr/Kitl/Prkar1a/Fcer1g/Nrarp/Vsir/Pag…	75
BP	GO:0070661	leukocyte proliferation	55|1439	259|16518	3.79896e-10	4.31261e-08	ENSMUSG00000022037/ENSMUSG00000022508/ENSMUSG00000027962/ENSMUSG00000014599/ENSMUSG00000031207/ENSMUSG00000023915/ENSMUSG00000067212/ENSMUSG00000024810/ENSMUSG00000024659/ENSMUSG00000018899/ENSMUSG00000021756/ENSMUSG00000024397/ENSMUSG00000050335/ENSMUSG00000026395/ENSMUSG00000053965/ENSMUSG00000027718/ENSMUSG00000026177/ENSMUSG00000001123/ENSMUSG00000019843/ENSMUSG00000016206/ENSMUSG00000039005/…	Clu/Bcl6/Vcam1/Csf1/Msn/Tnfrsf21/H2-T23/Il33/Anxa1/Irf1/Il6st/Aif1/Lgals3/Ptprc/Pde5a/Il21/Slc11a1/Lgals9/Fyn/H2-M3/Tlr4/Clcf1/Hmgb1/Cd180/Mapk8ip1/P2rx7/Tgfbr2/Cd274/Nckap1l/Rasal3/Cebpb/Lmo1/Cd24a/Cd151/H2-Ab1/Ccdc88b/Lyn/Erbb2/Ccl12/Ptpn6/Myd88/Cx3cl1/Cd276/Stat5b/Efnb1/Bmp4/Dock2/Kitl/Prkar1a/Vsir/Cdkn1a/Stat5a/Ripor2/Prkcq/Cd86	55
BP	GO:0032103	positive regulation of response to external stimulus	53|1439	246|16518	4.56821e-10	5.08004e-08	ENSMUSG00000037225/ENSMUSG00000028635/ENSMUSG00000030341/ENSMUSG00000037921/ENSMUSG00000038642/ENSMUSG00000031565/ENSMUSG00000014599/ENSMUSG00000055447/ENSMUSG00000037820/ENSMUSG00000062960/ENSMUSG00000029826/ENSMUSG00000024810/ENSMUSG00000034957/ENSMUSG00000034855/ENSMUSG00000021423/ENSMUSG00000031841/ENSMUSG00000020122/ENSMUSG00000045136/ENSMUSG00000024397/ENSMUSG00000064210/ENSMUSG00000105504/…	Fgf2/Edn2/Tnfrsf1a/Ddx60/Ctss/Fgfr1/Csf1/Cd47/Tgm2/Kdr/Zc3hav1/Il33/Cebpa/Cxcl10/Ly86/Cdh13/Egfr/Tubb2b/Aif1/Ano6/Gbp5/Tlr2/Pde5a/Il17ra/Wnt5a/Lgals9/Tlr4/Hmgb1/Cd180/Gprc5b/Ccl2/Sash1/Thbs1/Nckap1l/Cyba/Smad3/Cd24a/C3/Nod1/Myd88/Cx3cl1/Stat5b/Fn1/Ccr5/P2ry12/Fcer1g/Ptgs2/Slit2/Dhx58/Stat5a/Pik3cg/Ripor2/Il17rc	53
BP	GO:0050727	regulation of inflammatory response	55|1439	261|16518	5.13489e-10	5.596e-08	ENSMUSG00000030111/ENSMUSG00000023224/ENSMUSG00000053113/ENSMUSG00000030341/ENSMUSG00000038642/ENSMUSG00000022508/ENSMUSG00000028599/ENSMUSG00000052336/ENSMUSG00000055447/ENSMUSG00000037820/ENSMUSG00000002985/ENSMUSG00000026365/ENSMUSG00000026072/ENSMUSG00000044786/ENSMUSG00000028163/ENSMUSG00000024810/ENSMUSG00000034957/ENSMUSG00000024659/ENSMUSG00000031596/ENSMUSG00000030107/ENSMUSG00000020122/…	A2m/Serping1/Socs3/Tnfrsf1a/Ctss/Bcl6/Tnfrsf1b/Cx3cr1/Cd47/Tgm2/Apoe/Cfh/Il1r1/Zfp36/Nfkb1/Il33/Cebpa/Anxa1/Slc7a2/Usp18/Egfr/Gbp5/Casp1/Sbno2/Tlr2/Pde5a/Il17ra/Wnt5a/Lgals9/Tlr4/Mgll/Ggt1/Clcf1/Gprc5b/Zyx/Isl1/Smad3/Cd24a/C3/Lyn/Pik3ap1/Myd88/Cx3cl1/Cd276/Stat5b/Ccr5/Adora1/Abr/Fcer1g/Ptgs2/Krt1/Slit2/Stat5a/Pik3cg/Il17rc	55
BP	GO:1903037	regulation of leukocyte cell-cell adhesion	52|1439	240|16518	5.38844e-10	5.75718e-08	ENSMUSG00000005087/ENSMUSG00000037405/ENSMUSG00000007655/ENSMUSG00000022508/ENSMUSG00000027962/ENSMUSG00000055447/ENSMUSG00000023915/ENSMUSG00000067212/ENSMUSG00000019982/ENSMUSG00000024659/ENSMUSG00000018899/ENSMUSG00000021756/ENSMUSG00000024397/ENSMUSG00000076441/ENSMUSG00000026395/ENSMUSG00000053965/ENSMUSG00000027718/ENSMUSG00000027009/ENSMUSG00000030124/ENSMUSG00000001123/ENSMUSG00000061981/…	Cd44/Icam1/Cav1/Bcl6/Vcam1/Cd47/Tnfrsf21/H2-T23/Myb/Anxa1/Irf1/Il6st/Aif1/Ass1/Ptprc/Pde5a/Il21/Itga4/Lag3/Lgals9/Flot2/H2-M3/Hmgb1/Tgfbr2/Ccl2/Cd274/Nckap1l/Rasal3/Cebpb/Cd24a/H2-Ab1/Ccdc88b/Erbb2/Lgals1/Ptpn6/Cd276/Stat5b/Efnb1/Ccl28/Bmp4/Prkar1a/Zmiz1/Nrarp/Vsir/Pag1/Zfp608/Efnb2/Fam49b/Stat5a/Ripor2/Prkcq/Cd86	52
MF	GO:0005178	integrin binding	32|1421	108|16303	3.38418e-10	6.38934e-08	ENSMUSG00000037225/ENSMUSG00000020932/ENSMUSG00000067586/ENSMUSG00000037405/ENSMUSG00000019997/ENSMUSG00000027962/ENSMUSG00000025321/ENSMUSG00000028517/ENSMUSG00000000957/ENSMUSG00000001507/ENSMUSG00000062960/ENSMUSG00000017466/ENSMUSG00000030342/ENSMUSG00000028195/ENSMUSG00000015647/ENSMUSG00000020122/ENSMUSG00000027204/ENSMUSG00000027087/ENSMUSG00000021186/ENSMUSG00000021998/ENSMUSG00000066551/…	Fgf2/Gfap/S1pr3/Icam1/Ctgf/Vcam1/Itgb8/Plpp3/Mmp14/Itga3/Kdr/Timp2/Cd9/Cyr61/Lama5/Egfr/Fbn1/Itgav/Fbln5/Lcp1/Hmgb1/Lamb2/Thbs1/Cd151/Lyn/Cx3cl1/Fn1/Vwf/Itgb1/Jam3/Cib2/Emilin1	32
BP	GO:0048708	astrocyte differentiation	25|1439	72|16518	7.092e-10	7.4316e-08	ENSMUSG00000004040/ENSMUSG00000020932/ENSMUSG00000026923/ENSMUSG00000026728/ENSMUSG00000034394/ENSMUSG00000028517/ENSMUSG00000027168/ENSMUSG00000021756/ENSMUSG00000022892/ENSMUSG00000020122/ENSMUSG00000000567/ENSMUSG00000014773/ENSMUSG00000001761/ENSMUSG00000039005/ENSMUSG00000021464/ENSMUSG00000040663/ENSMUSG00000052911/ENSMUSG00000001911/ENSMUSG00000051910/ENSMUSG00000040249/ENSMUSG00000015599/…	Stat3/Gfap/Notch1/Vim/Lif/Plpp3/Pax6/Il6st/App/Egfr/Sox9/Dll1/Smo/Tlr4/Ror2/Clcf1/Lamb2/Nfix/Sox6/Lrp1/Ttbk1/Id4/S100b/Serpine2/Dab1	25
BP	GO:0007015	actin filament organization	69|1439	369|16518	8.48374e-10	8.72224e-08	ENSMUSG00000026414/ENSMUSG00000031636/ENSMUSG00000036995/ENSMUSG00000037405/ENSMUSG00000020388/ENSMUSG00000019997/ENSMUSG00000037736/ENSMUSG00000049493/ENSMUSG00000031328/ENSMUSG00000043079/ENSMUSG00000043850/ENSMUSG00000046768/ENSMUSG00000001313/ENSMUSG00000029622/ENSMUSG00000032554/ENSMUSG00000032194/ENSMUSG00000021676/ENSMUSG00000024397/ENSMUSG00000034616/ENSMUSG00000022469/ENSMUSG00000002233/…	Tnnt2/Pdlim3/Asap3/Icam1/Pdlim4/Ctgf/Limch1/Pls1/Flna/Synpo/Clrn1/Rhoj/Rnd2/Arpc1b/Trf/Kank2/Iqgap2/Aif1/Ssh3/Rapgef3/Rhoc/S100a10/Rhoq/Sptbn4/Samd14/Lcp1/Sorbs2/Capg/Plek/Zyx/Rnd3/Rock2/Arhgef10/Arhgef5/Ctnna2/Nckap1l/Tpm3/Smad3/Espn/Aif1l/Myadm/Ezr/Sh3pxd2b/Cgnl1/Gsn/Cdc42ep4/Pfn2/Cx3cl1/Pls3/Cobl/Ccdc155/Dmtn/Tmeff2/Rgs4/Arhgap6/Tpm4/Myo1c/Rhobtb3/Plekhh2/Arpin/Cap2/Slit2/Dbn1/Itgb5/Ang/Gdpd2/…	69
BP	GO:0002694	regulation of leukocyte activation	77|1439	432|16518	8.97617e-10	9.05762e-08	ENSMUSG00000007655/ENSMUSG00000022508/ENSMUSG00000027962/ENSMUSG00000055447/ENSMUSG00000000957/ENSMUSG00000002602/ENSMUSG00000023915/ENSMUSG00000067212/ENSMUSG00000024810/ENSMUSG00000019982/ENSMUSG00000034957/ENSMUSG00000024659/ENSMUSG00000031596/ENSMUSG00000018899/ENSMUSG00000021756/ENSMUSG00000022892/ENSMUSG00000024397/ENSMUSG00000050335/ENSMUSG00000041272/ENSMUSG00000026395/ENSMUSG00000053965/…	Cav1/Bcl6/Vcam1/Cd47/Mmp14/Axl/Tnfrsf21/H2-T23/Il33/Myb/Cebpa/Anxa1/Slc7a2/Irf1/Il6st/App/Aif1/Lgals3/Tox/Ptprc/Pde5a/Il21/Fas/Wnt5a/Lag3/Stat6/Lgals9/Flot2/H2-M3/Tlr4/Clcf1/Hmgb1/Mapk8ip1/Ptpre/Mertk/Tgfbr2/Ccl2/Cd274/Thbs1/Nckap1l/Rasal3/Cebpb/Tnip2/Lmo1/Cd24a/H2-Ab1/Zfp36l1/Gsn/Ccdc88b/Lyn/Erbb2/Lgals1/Sfrp1/Ptpn6/Ttbk1/Myd88/Cx3cl1/Cd276/Stat5b/Efnb1/Bmp4/Abr/Prkar1a/Zmiz1/Fcer1g/Nrarp/Vsir/P…	77
BP	GO:0007162	negative regulation of cell adhesion	53|1439	251|16518	9.81043e-10	9.71946e-08	ENSMUSG00000026923/ENSMUSG00000024087/ENSMUSG00000022508/ENSMUSG00000030123/ENSMUSG00000030671/ENSMUSG00000000957/ENSMUSG00000023915/ENSMUSG00000030342/ENSMUSG00000024659/ENSMUSG00000041075/ENSMUSG00000018899/ENSMUSG00000052920/ENSMUSG00000031841/ENSMUSG00000026640/ENSMUSG00000076441/ENSMUSG00000026395/ENSMUSG00000053965/ENSMUSG00000063531/ENSMUSG00000030124/ENSMUSG00000001123/ENSMUSG00000016206/…	Notch1/Cyp1b1/Bcl6/Plxnd1/Pde3b/Mmp14/Tnfrsf21/Cd9/Anxa1/Fzd7/Irf1/Prkg1/Cdh13/Plxna2/Ass1/Ptprc/Pde5a/Sema3e/Lag3/Lgals9/H2-M3/Ptprz1/Hmgb1/Cd274/Thbs1/Cebpb/Plxna1/Cd24a/Myadm/H2-Ab1/Enpp2/Erbb2/Lgals1/Sema6a/Ptpn6/Abat/Cd276/Plxnb2/Dmtn/Ccl28/Bmp4/Arhgap6/Prkar1a/Ajap1/Nrarp/Gcnt2/Vsir/Pag1/Zfp608/Ripor2/Serpine2/Dab1/Cd86	53
BP	GO:0042098	T cell proliferation	42|1439	176|16518	1.15656e-09	1.12537e-07	ENSMUSG00000027962/ENSMUSG00000031207/ENSMUSG00000023915/ENSMUSG00000067212/ENSMUSG00000024659/ENSMUSG00000018899/ENSMUSG00000021756/ENSMUSG00000024397/ENSMUSG00000050335/ENSMUSG00000026395/ENSMUSG00000053965/ENSMUSG00000027718/ENSMUSG00000026177/ENSMUSG00000001123/ENSMUSG00000019843/ENSMUSG00000016206/ENSMUSG00000066551/ENSMUSG00000027223/ENSMUSG00000029468/ENSMUSG00000032440/ENSMUSG00000016496/…	Vcam1/Msn/Tnfrsf21/H2-T23/Anxa1/Irf1/Il6st/Aif1/Lgals3/Ptprc/Pde5a/Il21/Slc11a1/Lgals9/Fyn/H2-M3/Hmgb1/Mapk8ip1/P2rx7/Tgfbr2/Cd274/Nckap1l/Rasal3/Cebpb/Lmo1/Cd24a/Cd151/H2-Ab1/Ccdc88b/Erbb2/Ptpn6/Cd276/Stat5b/Efnb1/Bmp4/Dock2/Prkar1a/Vsir/Stat5a/Ripor2/Prkcq/Cd86	42
BP	GO:0030111	regulation of Wnt signaling pathway	54|1439	260|16518	1.28229e-09	1.22582e-07	ENSMUSG00000037225/ENSMUSG00000026923/ENSMUSG00000030309/ENSMUSG00000007655/ENSMUSG00000020393/ENSMUSG00000016918/ENSMUSG00000002985/ENSMUSG00000028517/ENSMUSG00000001507/ENSMUSG00000027803/ENSMUSG00000028163/ENSMUSG00000041075/ENSMUSG00000044674/ENSMUSG00000006800/ENSMUSG00000032280/ENSMUSG00000020122/ENSMUSG00000070327/ENSMUSG00000000567/ENSMUSG00000001827/ENSMUSG00000038805/ENSMUSG00000020844/…	Fgf2/Notch1/Caprin2/Cav1/Kremen1/Sulf1/Apoe/Plpp3/Itga3/Wwtr1/Nfkb1/Fzd7/Fzd1/Sulf2/Tle3/Egfr/Rnf213/Sox9/Folr1/Six3/Nxn/Lgr5/Tlr2/Ankrd6/Ptk7/Wnt5a/Cdk14/Ror2/Gprc5b/Frzb/Isl1/Thra/Smad3/Dkk3/Wls/Mdfic/Dact3/Yap1/Tle2/Sfrp1/Shisa6/Dab2ip/Limd1/Tle1/Vangl2/Nrarp/Cdh3/Zeb2/Dact1/Csnk1e/Trpm4/Fzd6/Sox2/Nfatc4	54
BP	GO:1903034	regulation of response to wounding	37|1439	145|16518	1.55499e-09	1.46088e-07	ENSMUSG00000037225/ENSMUSG00000023224/ENSMUSG00000028583/ENSMUSG00000007655/ENSMUSG00000022912/ENSMUSG00000002985/ENSMUSG00000028517/ENSMUSG00000070509/ENSMUSG00000029231/ENSMUSG00000030342/ENSMUSG00000024659/ENSMUSG00000052920/ENSMUSG00000027712/ENSMUSG00000064210/ENSMUSG00000039005/ENSMUSG00000066551/ENSMUSG00000020120/ENSMUSG00000032440/ENSMUSG00000035385/ENSMUSG00000042105/ENSMUSG00000032231/…	Fgf2/Serping1/Pdpn/Cav1/Pros1/Apoe/Plpp3/Rgma/Pdgfra/Cd9/Anxa1/Prkg1/Anxa5/Ano6/Tlr4/Hmgb1/Plek/Tgfbr2/Ccl2/Inpp5f/Anxa2/Thbs1/Smad3/Cd24a/Lyn/Ptprf/Capn3/Abat/Abcc8/Dmtn/Eppk1/Cd34/Rtn4rl1/Ajap1/Fcer1g/Prkcq/Serpine2	37
BP	GO:0070663	regulation of leukocyte proliferation	45|1439	198|16518	1.58852e-09	1.46709e-07	ENSMUSG00000022508/ENSMUSG00000027962/ENSMUSG00000014599/ENSMUSG00000023915/ENSMUSG00000067212/ENSMUSG00000024659/ENSMUSG00000018899/ENSMUSG00000021756/ENSMUSG00000024397/ENSMUSG00000050335/ENSMUSG00000026395/ENSMUSG00000053965/ENSMUSG00000027718/ENSMUSG00000001123/ENSMUSG00000016206/ENSMUSG00000039005/ENSMUSG00000040663/ENSMUSG00000066551/ENSMUSG00000027223/ENSMUSG00000032440/ENSMUSG00000016496/…	Bcl6/Vcam1/Csf1/Tnfrsf21/H2-T23/Anxa1/Irf1/Il6st/Aif1/Lgals3/Ptprc/Pde5a/Il21/Lgals9/H2-M3/Tlr4/Clcf1/Hmgb1/Mapk8ip1/Tgfbr2/Cd274/Nckap1l/Rasal3/Cebpb/Lmo1/Cd24a/H2-Ab1/Ccdc88b/Lyn/Erbb2/Ccl12/Ptpn6/Myd88/Cd276/Stat5b/Efnb1/Bmp4/Kitl/Prkar1a/Vsir/Cdkn1a/Stat5a/Ripor2/Prkcq/Cd86	45
BP	GO:0007169	transmembrane receptor protein tyrosine kinase signaling pathway	84|1439	494|16518	1.63713e-09	1.47557e-07	ENSMUSG00000037225/ENSMUSG00000004040/ENSMUSG00000082361/ENSMUSG00000026923/ENSMUSG00000053113/ENSMUSG00000048612/ENSMUSG00000031502/ENSMUSG00000031565/ENSMUSG00000019997/ENSMUSG00000016918/ENSMUSG00000003534/ENSMUSG00000014599/ENSMUSG00000020467/ENSMUSG00000025351/ENSMUSG00000062960/ENSMUSG00000026674/ENSMUSG00000029231/ENSMUSG00000006435/ENSMUSG00000026185/ENSMUSG00000032562/ENSMUSG00000024621/…	Fgf2/Stat3/Btc/Notch1/Socs3/Myof/Col4a1/Fgfr1/Ctgf/Sulf1/Ddr1/Csf1/Efemp1/Cd63/Kdr/Ddr2/Pdgfra/Neurl1a/Igfbp5/Gnai2/Csf1r/Plat/Sulf2/Spry1/App/Col4a6/Cdh13/Adgra2/Ghr/Egfr/Irs1/Sox9/Dll1/Gab1/Pdgfrb/Rhoq/Insrr/Wnt5a/Fyn/Ntrk2/Ptprj/Ror2/Ptpre/Ccl2/Prkcb/Efna1/Ptpn1/Thbs1/Flrt3/Col4a5/Plcg1/Mvp/Trim72/Rhbdf1/Lyn/Ptprf/Epha2/Erbb2/Sema6a/Csrnp1/Stat5b/Efnb1/Plekha1/Dab2ip/Tcf4/Adora1/Bmp4/Socs2/Fgf…	84
BP	GO:0070371	ERK1 and ERK2 cascade	62|1439	321|16518	1.65186e-09	1.47557e-07	ENSMUSG00000037225/ENSMUSG00000026923/ENSMUSG00000005087/ENSMUSG00000064246/ENSMUSG00000037405/ENSMUSG00000031565/ENSMUSG00000007655/ENSMUSG00000020044/ENSMUSG00000019997/ENSMUSG00000003534/ENSMUSG00000034394/ENSMUSG00000002602/ENSMUSG00000062960/ENSMUSG00000026674/ENSMUSG00000029231/ENSMUSG00000032359/ENSMUSG00000032562/ENSMUSG00000024621/ENSMUSG00000028195/ENSMUSG00000026628/ENSMUSG00000037211/…	Fgf2/Notch1/Cd44/Chil1/Icam1/Fgfr1/Cav1/Timp3/Ctgf/Ddr1/Lif/Axl/Kdr/Ddr2/Pdgfra/Ctsh/Gnai2/Csf1r/Cyr61/Atf3/Spry1/App/Necab2/Egfr/Glipr2/Trf/Sox9/Trem2/Itgav/Pdgfrb/Ptprc/Insrr/Ntrk2/Tlr4/Ror2/Clcf1/Hmgb1/Notch2/Mertk/Ccl2/Oxtr/Ptpn1/Dusp6/C3/Ezr/Zfp36l1/Lyn/Epha2/Erbb2/Ccl12/Nod1/Sema6a/Ptpn6/Cx3cl1/Fn1/Dab2ip/Bmp4/Gcnt2/Ccl9/Emilin1/Tirap/Rras	62
BP	GO:0048762	mesenchymal cell differentiation	44|1439	192|16518	1.82926e-09	1.60769e-07	ENSMUSG00000026923/ENSMUSG00000028583/ENSMUSG00000031565/ENSMUSG00000031328/ENSMUSG00000048537/ENSMUSG00000027803/ENSMUSG00000027168/ENSMUSG00000025921/ENSMUSG00000019789/ENSMUSG00000015647/ENSMUSG00000037211/ENSMUSG00000028480/ENSMUSG00000000567/ENSMUSG00000001827/ENSMUSG00000001761/ENSMUSG00000026833/ENSMUSG00000063531/ENSMUSG00000028249/ENSMUSG00000021994/ENSMUSG00000039239/ENSMUSG00000026836/…	Notch1/Pdpn/Fgfr1/Flna/Phldb1/Wwtr1/Pax6/Rdh10/Hey2/Lama5/Spry1/Glipr2/Sox9/Folr1/Smo/Olfm1/Sema3e/Sdcbp/Wnt5a/Tgfb2/Acvr1/Tgfbr2/Frzb/Isl1/Efna1/Cyp26c1/Smad3/Tgfbr3/Dact3/Cul7/Sema6a/Sfrp1/Anxa6/Bcl9l/Efnb1/Fn1/Dab2ip/Bmp4/Fgfr2/Kitl/Vangl2/Sema4g/Gcnt2/Zeb2	44
BP	GO:0098742	cell-cell adhesion via plasma-membrane adhesion molecules	51|1439	241|16518	1.87293e-09	1.61994e-07	ENSMUSG00000036030/ENSMUSG00000027962/ENSMUSG00000022656/ENSMUSG00000046191/ENSMUSG00000032135/ENSMUSG00000006411/ENSMUSG00000031841/ENSMUSG00000051242/ENSMUSG00000031673/ENSMUSG00000043313/ENSMUSG00000045062/ENSMUSG00000013033/ENSMUSG00000001123/ENSMUSG00000044022/ENSMUSG00000039239/ENSMUSG00000026836/ENSMUSG00000058056/ENSMUSG00000040511/ENSMUSG00000032440/ENSMUSG00000005338/ENSMUSG00000051379/…	Prtg/Vcam1/Nectin3/Pcdhb20/Mcam/Nectin4/Cdh13/Pcdhb9/Cdh11/Pcdhb19/Pcdhb7/Adgrl1/Lgals9/Pcdhb21/Tgfb2/Acvr1/Palld/Pvr/Tgfbr2/Cadm3/Flrt3/Cd24a/Ptprd/Myadm/Pcdhb22/Celsr2/Arvcf/Pcdhb17/Ptprf/Scarf2/Lgals1/Ajuba/Pcdhb18/Cx3cl1/Amigo1/Pcdhb14/Plxnb2/Amigo2/Pcdh1/Fat4/Pcdhb16/Hmcn1/Emb/Pcdhb8/Cdh3/Pcdh11x/Mmp24/Igsf21/Dab1/Fat1/Unc5d	51
MF	GO:1901681	sulfur compound binding	48|1421	216|16303	1.03062e-09	1.62151e-07	ENSMUSG00000037225/ENSMUSG00000029718/ENSMUSG00000022893/ENSMUSG00000031565/ENSMUSG00000033327/ENSMUSG00000019997/ENSMUSG00000002985/ENSMUSG00000026365/ENSMUSG00000058897/ENSMUSG00000050069/ENSMUSG00000029838/ENSMUSG00000034855/ENSMUSG00000028195/ENSMUSG00000041577/ENSMUSG00000027712/ENSMUSG00000022892/ENSMUSG00000041936/ENSMUSG00000027204/ENSMUSG00000008540/ENSMUSG00000026837/ENSMUSG00000023885/…	Fgf2/Pcolce/Adamts1/Fgfr1/Tnxb/Ctgf/Apoe/Cfh/Col25a1/Grem2/Ptn/Cxcl10/Cyr61/Prelp/Anxa5/App/Agrn/Fbn1/Mgst1/Col5a1/Thbs2/Ptprc/Abi3bp/Hmgb1/Gstm1/Ccl2/Fstl1/Thbs1/Tgfbr3/Adamts5/Ptprf/Sfrp1/Anxa6/Mdk/Fn1/Aplp1/Bmp4/Cd34/Tkt/Rtn4rl1/Col23a1/Acads/Anxa4/Slit2/Ndnf/Ang/Col11a1/Serpine2	48
BP	GO:0008360	regulation of cell shape	36|1439	140|16518	2.05914e-09	1.75317e-07	ENSMUSG00000028583/ENSMUSG00000022272/ENSMUSG00000037405/ENSMUSG00000030123/ENSMUSG00000062960/ENSMUSG00000031207/ENSMUSG00000046768/ENSMUSG00000050271/ENSMUSG00000024659/ENSMUSG00000029838/ENSMUSG00000024621/ENSMUSG00000001313/ENSMUSG00000026640/ENSMUSG00000002233/ENSMUSG00000024143/ENSMUSG00000021665/ENSMUSG00000063531/ENSMUSG00000019843/ENSMUSG00000035863/ENSMUSG00000017144/ENSMUSG00000035385/…	Pdpn/Myo10/Icam1/Plxnd1/Kdr/Msn/Rhoj/Prag1/Anxa1/Ptn/Csf1r/Rnd2/Plxna2/Rhoc/Rhoq/Hexb/Sema3e/Fyn/Palm/Rnd3/Ccl2/Plxna1/Ezr/Cdc42ep4/Ccl12/Fn1/Plxnb2/Dmtn/Limd1/Cdc42se1/Rhobtb3/Coch/S100b/Fblim1/Cdc42ep1/Hck	36
BP	GO:0050866	negative regulation of cell activation	40|1439	168|16518	3.07196e-09	2.57524e-07	ENSMUSG00000022508/ENSMUSG00000002985/ENSMUSG00000002602/ENSMUSG00000029231/ENSMUSG00000023915/ENSMUSG00000030342/ENSMUSG00000024659/ENSMUSG00000018899/ENSMUSG00000052920/ENSMUSG00000053965/ENSMUSG00000024778/ENSMUSG00000030124/ENSMUSG00000001123/ENSMUSG00000016206/ENSMUSG00000066551/ENSMUSG00000014361/ENSMUSG00000016496/ENSMUSG00000056501/ENSMUSG00000047139/ENSMUSG00000073421/ENSMUSG00000042228/…	Bcl6/Apoe/Axl/Pdgfra/Tnfrsf21/Cd9/Anxa1/Irf1/Prkg1/Pde5a/Fas/Lag3/Lgals9/H2-M3/Hmgb1/Mertk/Cd274/Cebpb/Cd24a/H2-Ab1/Lyn/Erbb2/Sfrp1/Ptpn6/Abat/Cx3cl1/Cd276/Cygb/Bmp4/Abr/Prkar1a/Nrarp/Vsir/Pag1/Zfp608/Emilin1/Ripor2/Serpine2/Hmox1/Cd86	40
BP	GO:0060485	mesenchyme development	50|1439	238|16518	3.49182e-09	2.88287e-07	ENSMUSG00000026923/ENSMUSG00000028583/ENSMUSG00000031565/ENSMUSG00000031328/ENSMUSG00000048537/ENSMUSG00000027803/ENSMUSG00000027168/ENSMUSG00000025921/ENSMUSG00000019789/ENSMUSG00000015647/ENSMUSG00000037211/ENSMUSG00000028480/ENSMUSG00000034462/ENSMUSG00000000567/ENSMUSG00000001827/ENSMUSG00000024620/ENSMUSG00000001761/ENSMUSG00000026833/ENSMUSG00000023972/ENSMUSG00000063531/ENSMUSG00000028249/…	Notch1/Pdpn/Fgfr1/Flna/Phldb1/Wwtr1/Pax6/Rdh10/Hey2/Lama5/Spry1/Glipr2/Pkd2/Sox9/Folr1/Pdgfrb/Smo/Olfm1/Ptk7/Sema3e/Sdcbp/Wnt5a/Tgfb2/Acvr1/Tgfbr2/Frzb/Isl1/Efna1/Cyp26c1/Tead2/Smad3/Tgfbr3/Zfp36l1/Dact3/Yap1/Cul7/Sema6a/Sfrp1/Anxa6/Bcl9l/Efnb1/Fn1/Dab2ip/Bmp4/Fgfr2/Kitl/Vangl2/Sema4g/Gcnt2/Zeb2	50
MF	GO:0050840	extracellular matrix binding	21|1421	55|16303	2.2473e-09	3.03065e-07	ENSMUSG00000038642/ENSMUSG00000001507/ENSMUSG00000018593/ENSMUSG00000028195/ENSMUSG00000041936/ENSMUSG00000027087/ENSMUSG00000050335/ENSMUSG00000039116/ENSMUSG00000046618/ENSMUSG00000032231/ENSMUSG00000040152/ENSMUSG00000022894/ENSMUSG00000068220/ENSMUSG00000025809/ENSMUSG00000056481/ENSMUSG00000023328/ENSMUSG00000039115/ENSMUSG00000054162/ENSMUSG00000031558/ENSMUSG00000027111/ENSMUSG00000002980	Ctss/Itga3/Sparc/Cyr61/Agrn/Itgav/Lgals3/Adgrg6/Olfml2a/Anxa2/Thbs1/Adamts5/Lgals1/Itgb1/Cd248/Ache/Itga9/Spock3/Slit2/Itga6/Bcam	21
BP	GO:0051271	negative regulation of cellular component movement	57|1439	290|16518	3.86298e-09	3.12367e-07	ENSMUSG00000037225/ENSMUSG00000004040/ENSMUSG00000026923/ENSMUSG00000024087/ENSMUSG00000016918/ENSMUSG00000037736/ENSMUSG00000052336/ENSMUSG00000002985/ENSMUSG00000025351/ENSMUSG00000024810/ENSMUSG00000030342/ENSMUSG00000029838/ENSMUSG00000026185/ENSMUSG00000046718/ENSMUSG00000041120/ENSMUSG00000052920/ENSMUSG00000033170/ENSMUSG00000024397/ENSMUSG00000004665/ENSMUSG00000001131/ENSMUSG00000063531/…	Fgf2/Stat3/Notch1/Cyp1b1/Sulf1/Limch1/Cx3cr1/Apoe/Cd63/Il33/Cd9/Ptn/Igfbp5/Bst2/Nbl1/Prkg1/Card10/Aif1/Cnn2/Timp1/Sema3e/Wnt5a/Ptprj/Hmgb1/Trib1/Thbs1/Tgfbr3/Adamts9/Ccl12/Sema6a/Sfrp1/Pfn2/Cx3cl1/Abcc8/Dab2ip/Ccr5/Idh2/Eppk1/Ccl28/Tmeff2/Cygb/Lrch1/Adora1/Abr/Abhd2/Sema4g/Ptprk/Sp100/Arpin/Jup/Slit2/Emilin1/Dbn1/Adgrb1/Ripor2/2900011O08Rik/Rras	57
BP	GO:0061041	regulation of wound healing	32|1439	118|16518	3.89814e-09	3.12367e-07	ENSMUSG00000037225/ENSMUSG00000023224/ENSMUSG00000028583/ENSMUSG00000007655/ENSMUSG00000022912/ENSMUSG00000002985/ENSMUSG00000028517/ENSMUSG00000029231/ENSMUSG00000030342/ENSMUSG00000024659/ENSMUSG00000052920/ENSMUSG00000027712/ENSMUSG00000064210/ENSMUSG00000039005/ENSMUSG00000066551/ENSMUSG00000020120/ENSMUSG00000032440/ENSMUSG00000035385/ENSMUSG00000032231/ENSMUSG00000040152/ENSMUSG00000032402/…	Fgf2/Serping1/Pdpn/Cav1/Pros1/Apoe/Plpp3/Pdgfra/Cd9/Anxa1/Prkg1/Anxa5/Ano6/Tlr4/Hmgb1/Plek/Tgfbr2/Ccl2/Anxa2/Thbs1/Smad3/Lyn/Capn3/Abat/Abcc8/Dmtn/Eppk1/Cd34/Ajap1/Fcer1g/Prkcq/Serpine2	32
BP	GO:0007160	cell-matrix adhesion	43|1439	190|16518	4.18336e-09	3.30364e-07	ENSMUSG00000033327/ENSMUSG00000022508/ENSMUSG00000019997/ENSMUSG00000027962/ENSMUSG00000003534/ENSMUSG00000037736/ENSMUSG00000014599/ENSMUSG00000025321/ENSMUSG00000000957/ENSMUSG00000025351/ENSMUSG00000062960/ENSMUSG00000031841/ENSMUSG00000027087/ENSMUSG00000041959/ENSMUSG00000000290/ENSMUSG00000021806/ENSMUSG00000063531/ENSMUSG00000027009/ENSMUSG00000025314/ENSMUSG00000040274/ENSMUSG00000029860/…	Tnxb/Bcl6/Ctgf/Vcam1/Ddr1/Limch1/Csf1/Itgb8/Mmp14/Cd63/Kdr/Cdh13/Itgav/S100a10/Itgb2/Nid2/Sema3e/Itga4/Ptprj/Cdk6/Zyx/Frem1/Thbs1/Smad3/Adamts9/Enpp2/Ajuba/Fn1/Itgb1/Dmtn/Ccl28/Sned1/Arhgap6/Cd34/Jam3/Onecut2/Ajap1/Ptprk/Jup/Itga6/Emilin1/Itgb5/Bcam	43
BP	GO:0007157	heterophilic cell-cell adhesion via plasma membrane cell adhesion molecules	17|1439	38|16518	4.2745e-09	3.32739e-07	ENSMUSG00000027962/ENSMUSG00000022656/ENSMUSG00000032135/ENSMUSG00000006411/ENSMUSG00000013033/ENSMUSG00000001123/ENSMUSG00000040511/ENSMUSG00000005338/ENSMUSG00000047139/ENSMUSG00000028399/ENSMUSG00000012017/ENSMUSG00000068220/ENSMUSG00000050947/ENSMUSG00000048218/ENSMUSG00000046743/ENSMUSG00000066842/ENSMUSG00000040972	Vcam1/Nectin3/Mcam/Nectin4/Adgrl1/Lgals9/Pvr/Cadm3/Cd24a/Ptprd/Scarf2/Lgals1/Amigo1/Amigo2/Fat4/Hmcn1/Igsf21	17
CC	GO:0098858	actin-based cell projection	45|1463	208|16707	9.57905e-09	3.40902e-07	ENSMUSG00000028583/ENSMUSG00000022272/ENSMUSG00000027962/ENSMUSG00000001507/ENSMUSG00000031207/ENSMUSG00000043850/ENSMUSG00000029822/ENSMUSG00000029231/ENSMUSG00000028255/ENSMUSG00000021057/ENSMUSG00000022892/ENSMUSG00000031486/ENSMUSG00000031517/ENSMUSG00000021676/ENSMUSG00000022469/ENSMUSG00000002233/ENSMUSG00000027087/ENSMUSG00000025555/ENSMUSG00000060703/ENSMUSG00000058056/ENSMUSG00000021998/…	Pdpn/Myo10/Vcam1/Itga3/Msn/Clrn1/Osbpl3/Pdgfra/Clca1/Akap5/App/Adgra2/Gpm6a/Iqgap2/Rapgef3/Rhoc/Itgav/Farp1/Cd302/Palld/Lcp1/Ptprz1/Palm/Oxtr/Srcin1/Cd24a/Espn/Ezr/Erbb2/Arl4c/Pls3/Itgb1/Aqp5/Gap43/Kitl/Plekhg6/Cib2/Myo1c/Itga6/Dbn1/Ctsl/Ripor2/Antxr1/Fat1/Inppl1	45
BP	GO:0051051	negative regulation of transport	80|1439	472|16518	4.695e-09	3.60324e-07	ENSMUSG00000028635/ENSMUSG00000026923/ENSMUSG00000030341/ENSMUSG00000037405/ENSMUSG00000036880/ENSMUSG00000007655/ENSMUSG00000020641/ENSMUSG00000028599/ENSMUSG00000034394/ENSMUSG00000023915/ENSMUSG00000024810/ENSMUSG00000024659/ENSMUSG00000032562/ENSMUSG00000027499/ENSMUSG00000046718/ENSMUSG00000052920/ENSMUSG00000027712/ENSMUSG00000021057/ENSMUSG00000031837/ENSMUSG00000032060/ENSMUSG00000055980/…	Edn2/Notch1/Tnfrsf1a/Icam1/Acaa2/Cav1/Rsad2/Tnfrsf1b/Lif/Tnfrsf21/Il33/Anxa1/Gnai2/Pkia/Bst2/Prkg1/Anxa5/Akap5/Necab2/Cryab/Irs1/Pkd2/Sri/Prtn3/Agrn/Cnn2/Ucp2/Itgav/Lgals3/Rhoq/Map4k4/Sdcbp/Trim9/Cacnb3/Lgals9/Tgfb2/Bag3/Plcb4/Hmgb1/Gbp4/Prkcb/Oxtr/Srcin1/Siah3/Kcne1l/Thbs1/Ptgs1/Ezr/Rhbdf1/Mdfic/Gem/Sfrp1/Irak1/Abat/Cx3cl1/Fn1/Abcc8/Dmtn/Idh2/Comt/Entpd1/P2ry12/Adora1/Rgs4/Abr/Pde1c/Cd34/Vsnl1/A…	80
BP	GO:0042129	regulation of T cell proliferation	36|1439	145|16518	5.70673e-09	4.27488e-07	ENSMUSG00000027962/ENSMUSG00000023915/ENSMUSG00000067212/ENSMUSG00000024659/ENSMUSG00000018899/ENSMUSG00000021756/ENSMUSG00000024397/ENSMUSG00000050335/ENSMUSG00000026395/ENSMUSG00000053965/ENSMUSG00000027718/ENSMUSG00000001123/ENSMUSG00000016206/ENSMUSG00000066551/ENSMUSG00000027223/ENSMUSG00000032440/ENSMUSG00000016496/ENSMUSG00000022488/ENSMUSG00000052142/ENSMUSG00000056501/ENSMUSG00000036111/…	Vcam1/Tnfrsf21/H2-T23/Anxa1/Irf1/Il6st/Aif1/Lgals3/Ptprc/Pde5a/Il21/Lgals9/H2-M3/Hmgb1/Mapk8ip1/Tgfbr2/Cd274/Nckap1l/Rasal3/Cebpb/Lmo1/Cd24a/H2-Ab1/Ccdc88b/Erbb2/Ptpn6/Cd276/Stat5b/Efnb1/Bmp4/Prkar1a/Vsir/Stat5a/Ripor2/Prkcq/Cd86	36
BP	GO:0071219	cellular response to molecule of bacterial origin	42|1439	185|16518	5.72703e-09	4.27488e-07	ENSMUSG00000028270/ENSMUSG00000026728/ENSMUSG00000032372/ENSMUSG00000028599/ENSMUSG00000052336/ENSMUSG00000069874/ENSMUSG00000002602/ENSMUSG00000020638/ENSMUSG00000104713/ENSMUSG00000044786/ENSMUSG00000028163/ENSMUSG00000034855/ENSMUSG00000021423/ENSMUSG00000015243/ENSMUSG00000023992/ENSMUSG00000025888/ENSMUSG00000076441/ENSMUSG00000035673/ENSMUSG00000027995/ENSMUSG00000041515/ENSMUSG00000021994/…	Gbp2/Vim/Plscr2/Tnfrsf1b/Cx3cr1/Irgm2/Axl/Cmpk2/Gbp6/Zfp36/Nfkb1/Cxcl10/Ly86/Abca1/Trem2/Casp1/Ass1/Sbno2/Tlr2/Irf8/Wnt5a/Tlr4/Cd180/Ccl2/Sash1/Trib1/Cd274/Cebpb/Tnip2/Lyn/Ccl12/Irak1/Myd88/Cx3cl1/Irak2/Dab2ip/Ccr5/Tspo/Arid5a/Litaf/Cd86/Pde4b	42
BP	GO:0032944	regulation of mononuclear cell proliferation	43|1439	192|16518	5.85339e-09	4.31015e-07	ENSMUSG00000022508/ENSMUSG00000027962/ENSMUSG00000014599/ENSMUSG00000023915/ENSMUSG00000067212/ENSMUSG00000024659/ENSMUSG00000018899/ENSMUSG00000021756/ENSMUSG00000024397/ENSMUSG00000050335/ENSMUSG00000026395/ENSMUSG00000053965/ENSMUSG00000027718/ENSMUSG00000001123/ENSMUSG00000016206/ENSMUSG00000039005/ENSMUSG00000040663/ENSMUSG00000066551/ENSMUSG00000027223/ENSMUSG00000032440/ENSMUSG00000016496/…	Bcl6/Vcam1/Csf1/Tnfrsf21/H2-T23/Anxa1/Irf1/Il6st/Aif1/Lgals3/Ptprc/Pde5a/Il21/Lgals9/H2-M3/Tlr4/Clcf1/Hmgb1/Mapk8ip1/Tgfbr2/Cd274/Nckap1l/Rasal3/Cebpb/Lmo1/Cd24a/H2-Ab1/Ccdc88b/Lyn/Erbb2/Ptpn6/Myd88/Cd276/Stat5b/Efnb1/Bmp4/Prkar1a/Vsir/Cdkn1a/Stat5a/Ripor2/Prkcq/Cd86	43
BP	GO:0001501	skeletal system development	74|1439	426|16518	6.10057e-09	4.43227e-07	ENSMUSG00000037225/ENSMUSG00000005087/ENSMUSG00000031565/ENSMUSG00000019997/ENSMUSG00000016918/ENSMUSG00000022098/ENSMUSG00000020467/ENSMUSG00000025321/ENSMUSG00000000957/ENSMUSG00000029231/ENSMUSG00000018593/ENSMUSG00000025921/ENSMUSG00000028195/ENSMUSG00000002799/ENSMUSG00000022483/ENSMUSG00000006800/ENSMUSG00000030579/ENSMUSG00000055737/ENSMUSG00000000567/ENSMUSG00000027204/ENSMUSG00000064210/…	Fgf2/Cd44/Fgfr1/Ctgf/Sulf1/Bmp1/Efemp1/Itgb8/Mmp14/Pdgfra/Sparc/Rdh10/Cyr61/Jag2/Col2a1/Sulf2/Tyrobp/Ghr/Sox9/Fbn1/Ano6/Timp1/Ptprc/Npr2/Gas1/Serpinh1/Hexb/Matn2/Tulp3/Wnt5a/Tgfb2/Etl4/Nfib/Ror2/Nbeal2/Vit/Notch2/Evc/P2rx7/Tgfbr2/Frzb/Frem1/Anxa2/Thra/Smad3/P3h1/Maf/Sox6/Sh3pxd2b/Epha2/Slc39a1/Sfrp1/Anxa6/Ptpn6/Csrnp1/Pls3/Plekha1/Csgalnact1/Ttc9/Bmp4/Fgfr2/Fat4/Col1a2/Zic1/Coch/Pcgf2/Tmem119/Pth…	74
BP	GO:0002253	activation of immune response	60|1439	317|16518	6.7124e-09	4.81262e-07	ENSMUSG00000073418/ENSMUSG00000030111/ENSMUSG00000023224/ENSMUSG00000037921/ENSMUSG00000020227/ENSMUSG00000030921/ENSMUSG00000007655/ENSMUSG00000036905/ENSMUSG00000058952/ENSMUSG00000020641/ENSMUSG00000036887/ENSMUSG00000069874/ENSMUSG00000026365/ENSMUSG00000036896/ENSMUSG00000057143/ENSMUSG00000040296/ENSMUSG00000026896/ENSMUSG00000023915/ENSMUSG00000029826/ENSMUSG00000018899/ENSMUSG00000055172/…	C4b/A2m/Serping1/Ddx60/Irak3/Trim30a/Cav1/C1qb/Cfi/Rsad2/C1qa/Irgm2/Cfh/C1qc/Trim12c/Ddx58/Ifih1/Tnfrsf21/Zc3hav1/Irf1/C1ra/Ptprc/Tlr2/Flot1/Unc93b1/Cacnb3/Lgals9/Fyn/Tlr4/Ptprj/Tril/Hmgb1/Rab7b/Prkcb/Nckap1l/Cyba/Tnip2/Plcg1/C3/Ezr/Cacnb4/Lyn/Pik3ap1/Irak1/Ptpn6/Myd88/Cd276/Irak2/Plekha1/Dab2ip/Prkch/Fcer1g/Tmem173/Krt1/Mapkapk3/Dhx58/Tirap/Trim5/Cd86/Pde4b	60
BP	GO:0044089	positive regulation of cellular component biogenesis	81|1439	484|16518	6.81727e-09	4.82432e-07	ENSMUSG00000022037/ENSMUSG00000037405/ENSMUSG00000007655/ENSMUSG00000020388/ENSMUSG00000019997/ENSMUSG00000037736/ENSMUSG00000031328/ENSMUSG00000016758/ENSMUSG00000043079/ENSMUSG00000048537/ENSMUSG00000062960/ENSMUSG00000031207/ENSMUSG00000043850/ENSMUSG00000006435/ENSMUSG00000034957/ENSMUSG00000029622/ENSMUSG00000021068/ENSMUSG00000028184/ENSMUSG00000031517/ENSMUSG00000021676/ENSMUSG00000027479/…	Clu/Icam1/Cav1/Pdlim4/Ctgf/Limch1/Flna/Bik/Synpo/Phldb1/Kdr/Msn/Clrn1/Neurl1a/Cebpa/Arpc1b/Nin/Adgrl2/Gpm6a/Iqgap2/Mapre1/Agrn/Sox9/Gbp5/Rapgef3/Rhoc/S100a10/Thbs2/Lrrn3/Flot1/Rhoq/Adgrl1/Sdcbp/Fas/Ntrk2/Tlr4/Fnbp1l/Palld/Ptprj/Lcp1/Plek/Palm/P2rx7/Rock2/Oxtr/Arhgef10/Arhgef5/Nckap1l/Plppr5/Smad3/Flrt3/Cd24a/Ptprd/Espn/Spidr/Enpp2/Sh3pxd2b/Gsn/Cdc42ep4/Ajuba/Ttbk1/Pfn2/Cx3cl1/Amigo1/Cobl/Amigo2/P…	81
BP	GO:0002521	leukocyte differentiation	78|1439	460|16518	7.19319e-09	5.02509e-07	ENSMUSG00000004040/ENSMUSG00000053175/ENSMUSG00000060802/ENSMUSG00000052837/ENSMUSG00000023367/ENSMUSG00000022508/ENSMUSG00000029810/ENSMUSG00000020641/ENSMUSG00000014599/ENSMUSG00000034394/ENSMUSG00000000957/ENSMUSG00000002602/ENSMUSG00000036896/ENSMUSG00000019982/ENSMUSG00000034957/ENSMUSG00000024659/ENSMUSG00000041075/ENSMUSG00000024026/ENSMUSG00000024621/ENSMUSG00000018899/ENSMUSG00000002799/…	Stat3/Bcl3/B2m/Junb/Tmem176a/Bcl6/Tmem176b/Rsad2/Csf1/Lif/Mmp14/Axl/C1qc/Myb/Cebpa/Anxa1/Fzd7/Glo1/Csf1r/Irf1/Jag2/Ltbr/App/Tyrobp/Klf10/Trf/Prtn3/Hdac7/Fbn1/Dll1/Trem2/Tox/Ptprc/Sbno2/Rbp1/Il21/Fas/Stat6/Lgals9/H2-M3/Ror2/Clcf1/Cdk6/Hmgb1/Notch2/Runx1/Mertk/Tgfbr2/Lfng/Trib1/Anxa2/Nckap1l/Cebpb/Cd24a/H2-Ab1/Zfp36l1/Lyn/Epha2/Erbb2/Lgals1/Sfrp1/Ptpn6/Stat5b/Bmp4/Dock2/Kitl/Zmiz1/Fcer1g/Nrarp/Vsir…	78
BP	GO:0072503	cellular divalent inorganic cation homeostasis	76|1439	444|16518	7.38051e-09	5.09068e-07	ENSMUSG00000037225/ENSMUSG00000028635/ENSMUSG00000032648/ENSMUSG00000007655/ENSMUSG00000052336/ENSMUSG00000037820/ENSMUSG00000002985/ENSMUSG00000029231/ENSMUSG00000030669/ENSMUSG00000034855/ENSMUSG00000028036/ENSMUSG00000052920/ENSMUSG00000021756/ENSMUSG00000027712/ENSMUSG00000021057/ENSMUSG00000022892/ENSMUSG00000034462/ENSMUSG00000003161/ENSMUSG00000056073/ENSMUSG00000027087/ENSMUSG00000026395/…	Fgf2/Edn2/Pygm/Cav1/Cx3cr1/Tgm2/Apoe/Pdgfra/Calca/Cxcl10/Ptgfr/Prkg1/Il6st/Anxa5/Akap5/App/Pkd2/Sri/Grik2/Itgav/Ptprc/Slc41a1/Hexb/Slc11a1/Cacnb3/Wnt5a/Asph/Fyn/Tgfb2/Hmgb1/P2rx7/Ccl2/Prkcb/Oxtr/Slc39a12/Gria1/Dmpk/Anxa2/Itpr3/Cyba/Smad3/Cd24a/Plcg1/Kcna5/Cacna1a/Jph1/Tpcn2/Lyn/Ccl12/Anxa6/Plcd1/Ptpn6/Capn3/Cx3cl1/Cacna1g/Ccr5/Ccl28/Adora1/Bmp4/Kctd17/Gpr157/Tmem165/Cib2/Itpr1/S100b/1600014C10Rik…	76
BP	GO:0071222	cellular response to lipopolysaccharide	41|1439	180|16518	7.83555e-09	5.30602e-07	ENSMUSG00000028270/ENSMUSG00000026728/ENSMUSG00000032372/ENSMUSG00000028599/ENSMUSG00000052336/ENSMUSG00000069874/ENSMUSG00000002602/ENSMUSG00000020638/ENSMUSG00000104713/ENSMUSG00000044786/ENSMUSG00000028163/ENSMUSG00000034855/ENSMUSG00000021423/ENSMUSG00000015243/ENSMUSG00000023992/ENSMUSG00000025888/ENSMUSG00000076441/ENSMUSG00000035673/ENSMUSG00000041515/ENSMUSG00000021994/ENSMUSG00000039005/…	Gbp2/Vim/Plscr2/Tnfrsf1b/Cx3cr1/Irgm2/Axl/Cmpk2/Gbp6/Zfp36/Nfkb1/Cxcl10/Ly86/Abca1/Trem2/Casp1/Ass1/Sbno2/Irf8/Wnt5a/Tlr4/Cd180/Ccl2/Sash1/Trib1/Cd274/Cebpb/Tnip2/Lyn/Ccl12/Irak1/Myd88/Cx3cl1/Irak2/Dab2ip/Ccr5/Tspo/Arid5a/Litaf/Cd86/Pde4b	41
BP	GO:0051249	regulation of lymphocyte activation	65|1439	357|16518	7.88746e-09	5.30602e-07	ENSMUSG00000007655/ENSMUSG00000022508/ENSMUSG00000027962/ENSMUSG00000055447/ENSMUSG00000000957/ENSMUSG00000002602/ENSMUSG00000023915/ENSMUSG00000067212/ENSMUSG00000019982/ENSMUSG00000024659/ENSMUSG00000018899/ENSMUSG00000021756/ENSMUSG00000024397/ENSMUSG00000050335/ENSMUSG00000041272/ENSMUSG00000026395/ENSMUSG00000053965/ENSMUSG00000027718/ENSMUSG00000024778/ENSMUSG00000030124/ENSMUSG00000002147/…	Cav1/Bcl6/Vcam1/Cd47/Mmp14/Axl/Tnfrsf21/H2-T23/Myb/Anxa1/Irf1/Il6st/Aif1/Lgals3/Tox/Ptprc/Pde5a/Il21/Fas/Lag3/Stat6/Lgals9/Flot2/H2-M3/Tlr4/Clcf1/Hmgb1/Mapk8ip1/Mertk/Tgfbr2/Ccl2/Cd274/Nckap1l/Rasal3/Cebpb/Tnip2/Lmo1/Cd24a/H2-Ab1/Zfp36l1/Gsn/Ccdc88b/Lyn/Erbb2/Lgals1/Sfrp1/Ptpn6/Myd88/Cd276/Stat5b/Efnb1/Bmp4/Prkar1a/Zmiz1/Nrarp/Vsir/Pag1/Zfp608/Efnb2/Fam49b/Cdkn1a/Stat5a/Ripor2/Prkcq/Cd86	65
BP	GO:0007264	small GTPase mediated signal transduction	78|1439	462|16518	8.76246e-09	5.82276e-07	ENSMUSG00000026923/ENSMUSG00000028583/ENSMUSG00000022508/ENSMUSG00000021701/ENSMUSG00000014599/ENSMUSG00000038816/ENSMUSG00000002985/ENSMUSG00000001507/ENSMUSG00000017466/ENSMUSG00000041498/ENSMUSG00000024998/ENSMUSG00000046768/ENSMUSG00000050271/ENSMUSG00000023460/ENSMUSG00000001313/ENSMUSG00000037211/ENSMUSG00000031841/ENSMUSG00000026821/ENSMUSG00000058325/ENSMUSG00000024397/ENSMUSG00000015243/…	Notch1/Pdpn/Bcl6/Plk2/Csf1/Ctnnal1/Apoe/Itga3/Timp2/Kif14/Plce1/Rhoj/Prag1/Rab12/Rnd2/Spry1/Cdh13/Ralgds/Dock1/Aif1/Abca1/Dgkz/Rapgef3/Rhoc/Pdgfrb/Chn2/Arhgef19/Arhgef40/Arhgef4/Dock7/Arhgap42/Flot1/Rhoq/Farp1/Sdcbp/Tgfb2/Notch2/Rnd3/Rab7b/Rock2/Arhgef10/Arhgef5/Rasal3/Cyth4/Rasa4/Rasa2/Cgnl1/Cdc42ep4/Arhgef17/Plekhg1/Rab3d/Erbb2/Chn1/Rras2/Itgb1/Arl6/Dab2ip/Cdc42se1/Dock2/Abr/Net1/Trio/Kitl/Col1…	78
BP	GO:0002697	regulation of immune effector process	62|1439	335|16518	9.20433e-09	6.0427e-07	ENSMUSG00000030111/ENSMUSG00000023224/ENSMUSG00000035929/ENSMUSG00000061232/ENSMUSG00000037921/ENSMUSG00000060802/ENSMUSG00000020227/ENSMUSG00000073411/ENSMUSG00000022508/ENSMUSG00000020641/ENSMUSG00000022906/ENSMUSG00000026365/ENSMUSG00000026072/ENSMUSG00000040296/ENSMUSG00000067212/ENSMUSG00000029826/ENSMUSG00000024810/ENSMUSG00000019982/ENSMUSG00000024659/ENSMUSG00000018899/ENSMUSG00000026104/…	A2m/Serping1/H2-Q4/H2-K1/Ddx60/B2m/Irak3/H2-D1/Bcl6/Rsad2/Parp9/Cfh/Il1r1/Ddx58/H2-T23/Zc3hav1/Il33/Myb/Anxa1/Irf1/Stat1/Bst2/Dtx3l/Ptprc/Il21/Tap1/Wnt5a/Lag3/Stat6/Lgals9/H2-M3/H2-Q6/Tgfb2/Tlr4/Pvr/Tril/Clcf1/Hmgb1/Gprc5b/P2rx7/Gbp4/Ccl2/Cd24a/C3/Lyn/H2-Q7/Ptpn6/Stat5b/Abr/Fcer1g/H2-T22/Tmem173/Vsir/Vav1/Fam49b/Dhx58/Stat5a/Arid5a/Hmox1/Trpm4/Apobec3/Ifnlr1	62
BP	GO:0002221	pattern recognition receptor signaling pathway	32|1439	122|16518	9.49921e-09	6.05325e-07	ENSMUSG00000037921/ENSMUSG00000020227/ENSMUSG00000030921/ENSMUSG00000007655/ENSMUSG00000020641/ENSMUSG00000069874/ENSMUSG00000057143/ENSMUSG00000040296/ENSMUSG00000026896/ENSMUSG00000029826/ENSMUSG00000018899/ENSMUSG00000027995/ENSMUSG00000059714/ENSMUSG00000036908/ENSMUSG00000001123/ENSMUSG00000039005/ENSMUSG00000043496/ENSMUSG00000066551/ENSMUSG00000052688/ENSMUSG00000006519/ENSMUSG00000059866/…	Ddx60/Irak3/Trim30a/Cav1/Rsad2/Irgm2/Trim12c/Ddx58/Ifih1/Zc3hav1/Irf1/Tlr2/Flot1/Unc93b1/Lgals9/Tlr4/Tril/Hmgb1/Rab7b/Cyba/Tnip2/Lyn/Pik3ap1/Irak1/Myd88/Irak2/Dab2ip/Mapkapk3/Dhx58/Tirap/Trim5/Cd86	32
BP	GO:0022612	gland morphogenesis	32|1439	122|16518	9.49921e-09	6.05325e-07	ENSMUSG00000026923/ENSMUSG00000031565/ENSMUSG00000007655/ENSMUSG00000016918/ENSMUSG00000003534/ENSMUSG00000030123/ENSMUSG00000014599/ENSMUSG00000037820/ENSMUSG00000031207/ENSMUSG00000027168/ENSMUSG00000029838/ENSMUSG00000026185/ENSMUSG00000006800/ENSMUSG00000015647/ENSMUSG00000020122/ENSMUSG00000000567/ENSMUSG00000021994/ENSMUSG00000002147/ENSMUSG00000039239/ENSMUSG00000008575/ENSMUSG00000032440/…	Notch1/Fgfr1/Cav1/Sulf1/Ddr1/Plxnd1/Csf1/Tgm2/Msn/Pax6/Ptn/Igfbp5/Sulf2/Lama5/Egfr/Sox9/Wnt5a/Stat6/Tgfb2/Nfib/Tgfbr2/Cebpb/Plxna1/Epha2/Sfrp1/Bmp4/Id4/Rps6ka1/Lama1/Slit2/Stat5a/Lrp5	32
BP	GO:0001818	negative regulation of cytokine production	44|1439	202|16518	9.59522e-09	6.05325e-07	ENSMUSG00000053175/ENSMUSG00000030341/ENSMUSG00000020227/ENSMUSG00000030921/ENSMUSG00000031565/ENSMUSG00000022508/ENSMUSG00000052336/ENSMUSG00000002602/ENSMUSG00000023915/ENSMUSG00000044786/ENSMUSG00000028163/ENSMUSG00000024810/ENSMUSG00000024659/ENSMUSG00000046718/ENSMUSG00000022475/ENSMUSG00000014773/ENSMUSG00000026395/ENSMUSG00000026177/ENSMUSG00000030124/ENSMUSG00000001123/ENSMUSG00000026946/…	Bcl3/Tnfrsf1a/Irak3/Trim30a/Fgfr1/Bcl6/Cx3cr1/Axl/Tnfrsf21/Zfp36/Nfkb1/Il33/Anxa1/Bst2/Hdac7/Dll1/Ptprc/Slc11a1/Lag3/Lgals9/Nmi/Tgfb2/Tlr4/Hmgb1/Mertk/Gbp4/Cd274/Thbs1/Nckap1l/Cd24a/Ezr/Epha2/Ptpn6/Cx3cl1/Cd276/Fn1/Tspo/Cd34/Anxa4/Vsir/Cdh3/Dhx58/Hmox1/Syt11	44
BP	GO:0072507	divalent inorganic cation homeostasis	78|1439	463|16518	9.66476e-09	6.05325e-07	ENSMUSG00000037225/ENSMUSG00000028635/ENSMUSG00000032648/ENSMUSG00000007655/ENSMUSG00000052336/ENSMUSG00000037820/ENSMUSG00000002985/ENSMUSG00000029231/ENSMUSG00000030669/ENSMUSG00000034855/ENSMUSG00000028036/ENSMUSG00000052920/ENSMUSG00000021756/ENSMUSG00000027712/ENSMUSG00000021057/ENSMUSG00000022892/ENSMUSG00000020122/ENSMUSG00000034462/ENSMUSG00000003161/ENSMUSG00000056073/ENSMUSG00000027087/…	Fgf2/Edn2/Pygm/Cav1/Cx3cr1/Tgm2/Apoe/Pdgfra/Calca/Cxcl10/Ptgfr/Prkg1/Il6st/Anxa5/Akap5/App/Egfr/Pkd2/Sri/Grik2/Itgav/Ptprc/Slc41a1/Hexb/Slc11a1/Cacnb3/Wnt5a/Asph/Fyn/Tgfb2/Hmgb1/P2rx7/Ccl2/Prkcb/Oxtr/Slc39a12/Gria1/Dmpk/Anxa2/Itpr3/Cyba/Smad3/Cd24a/Plcg1/Kcna5/Cacna1a/Jph1/Tpcn2/Lyn/Ccl12/Anxa6/Plcd1/Ptpn6/Capn3/Cx3cl1/Cacna1g/Ccr5/Ccl28/Adora1/Bmp4/Kctd17/Gpr157/Tmem165/Cib2/Tmtc2/Itpr1/S100b/16…	78
BP	GO:0040013	negative regulation of locomotion	58|1439	305|16518	1.00294e-08	6.1591e-07	ENSMUSG00000037225/ENSMUSG00000004040/ENSMUSG00000026923/ENSMUSG00000024087/ENSMUSG00000016918/ENSMUSG00000037736/ENSMUSG00000052336/ENSMUSG00000002985/ENSMUSG00000025351/ENSMUSG00000024810/ENSMUSG00000029838/ENSMUSG00000026185/ENSMUSG00000046718/ENSMUSG00000041120/ENSMUSG00000052920/ENSMUSG00000033170/ENSMUSG00000024397/ENSMUSG00000004665/ENSMUSG00000001131/ENSMUSG00000063531/ENSMUSG00000021994/…	Fgf2/Stat3/Notch1/Cyp1b1/Sulf1/Limch1/Cx3cr1/Apoe/Cd63/Il33/Ptn/Igfbp5/Bst2/Nbl1/Prkg1/Card10/Aif1/Cnn2/Timp1/Sema3e/Wnt5a/Ptprj/Hmgb1/Trib1/Thbs1/Adamts9/Ccl12/Sema6a/Sfrp1/Pfn2/Cx3cl1/Abcc8/Dab2ip/Ccr5/Idh2/Eppk1/Ccl28/Tmeff2/Cygb/Lrch1/Adora1/Abr/Abhd2/Sema4g/Trim21/Mid2/Ptprk/Sp100/Arpin/Trim35/Jup/Slit2/Emilin1/Dbn1/Adgrb1/Ripor2/2900011O08Rik/Rras	58
BP	GO:0016055	Wnt signaling pathway	66|1439	367|16518	1.00598e-08	6.1591e-07	ENSMUSG00000037225/ENSMUSG00000026923/ENSMUSG00000030309/ENSMUSG00000007655/ENSMUSG00000020393/ENSMUSG00000016918/ENSMUSG00000023031/ENSMUSG00000002985/ENSMUSG00000028517/ENSMUSG00000001507/ENSMUSG00000002602/ENSMUSG00000027803/ENSMUSG00000028163/ENSMUSG00000041075/ENSMUSG00000021182/ENSMUSG00000044674/ENSMUSG00000006800/ENSMUSG00000032280/ENSMUSG00000020122/ENSMUSG00000070327/ENSMUSG00000000567/…	Fgf2/Notch1/Caprin2/Cav1/Kremen1/Sulf1/Cela1/Apoe/Plpp3/Itga3/Axl/Wwtr1/Nfkb1/Fzd7/Ccdc88c/Fzd1/Sulf2/Tle3/Egfr/Rnf213/Sox9/Folr1/Six3/Nxn/Lgr5/Tlr2/Ankrd6/Ptk7/Wnt5a/Cdk14/Ror2/Gprc5b/Mertk/Frzb/Isl1/Thra/Smad3/Dkk3/Wls/Mdfic/Dact3/Yap1/Tle2/Sfrp1/Shisa6/Bcl9l/Arl6/Dab2ip/Limd1/Tcf7l1/Tle1/Vangl2/Nrarp/Tcf7/Cdh3/Zeb2/Dact1/Csnk1e/Trpm4/Fzd6/Sox2/Nfatc4/Ndp/Amotl1/Lrp5/Mark1	66
BP	GO:0002449	lymphocyte mediated immunity	48|1439	231|16518	1.03829e-08	6.28627e-07	ENSMUSG00000073418/ENSMUSG00000023224/ENSMUSG00000053175/ENSMUSG00000035929/ENSMUSG00000061232/ENSMUSG00000037405/ENSMUSG00000060802/ENSMUSG00000073411/ENSMUSG00000036905/ENSMUSG00000022508/ENSMUSG00000058952/ENSMUSG00000020641/ENSMUSG00000036887/ENSMUSG00000030560/ENSMUSG00000036896/ENSMUSG00000026072/ENSMUSG00000067212/ENSMUSG00000032359/ENSMUSG00000055172/ENSMUSG00000026395/ENSMUSG00000027718/…	C4b/Serping1/Bcl3/H2-Q4/H2-K1/Icam1/B2m/H2-D1/C1qb/Bcl6/Cfi/Rsad2/C1qa/Ctsc/C1qc/Il1r1/H2-T23/Ctsh/C1ra/Ptprc/Il21/Tap1/Slc11a1/Fas/Lag3/Stat6/Lgals9/H2-M3/H2-Q6/Pvr/Clcf1/Hmgb1/P2rx7/Cd24a/C3/H2-Ab1/H2-Q7/Ptpn6/Myd88/Stat5b/Fcer1g/H2-T22/Vsir/Vav1/Fam49b/Stat5a/Arid5a/Trpm4	48
BP	GO:0030336	negative regulation of cell migration	50|1439	246|16518	1.1093e-08	6.64237e-07	ENSMUSG00000037225/ENSMUSG00000004040/ENSMUSG00000026923/ENSMUSG00000024087/ENSMUSG00000016918/ENSMUSG00000037736/ENSMUSG00000052336/ENSMUSG00000002985/ENSMUSG00000025351/ENSMUSG00000024810/ENSMUSG00000029838/ENSMUSG00000026185/ENSMUSG00000046718/ENSMUSG00000041120/ENSMUSG00000052920/ENSMUSG00000033170/ENSMUSG00000024397/ENSMUSG00000004665/ENSMUSG00000001131/ENSMUSG00000025314/ENSMUSG00000066551/…	Fgf2/Stat3/Notch1/Cyp1b1/Sulf1/Limch1/Cx3cr1/Apoe/Cd63/Il33/Ptn/Igfbp5/Bst2/Nbl1/Prkg1/Card10/Aif1/Cnn2/Timp1/Ptprj/Hmgb1/Trib1/Thbs1/Adamts9/Ccl12/Sfrp1/Pfn2/Cx3cl1/Abcc8/Dab2ip/Ccr5/Idh2/Eppk1/Ccl28/Tmeff2/Cygb/Lrch1/Adora1/Abr/Abhd2/Ptprk/Sp100/Arpin/Jup/Slit2/Emilin1/Adgrb1/Ripor2/2900011O08Rik/Rras	50
BP	GO:0198738	cell-cell signaling by wnt	66|1439	369|16518	1.25567e-08	7.43713e-07	ENSMUSG00000037225/ENSMUSG00000026923/ENSMUSG00000030309/ENSMUSG00000007655/ENSMUSG00000020393/ENSMUSG00000016918/ENSMUSG00000023031/ENSMUSG00000002985/ENSMUSG00000028517/ENSMUSG00000001507/ENSMUSG00000002602/ENSMUSG00000027803/ENSMUSG00000028163/ENSMUSG00000041075/ENSMUSG00000021182/ENSMUSG00000044674/ENSMUSG00000006800/ENSMUSG00000032280/ENSMUSG00000020122/ENSMUSG00000070327/ENSMUSG00000000567/…	Fgf2/Notch1/Caprin2/Cav1/Kremen1/Sulf1/Cela1/Apoe/Plpp3/Itga3/Axl/Wwtr1/Nfkb1/Fzd7/Ccdc88c/Fzd1/Sulf2/Tle3/Egfr/Rnf213/Sox9/Folr1/Six3/Nxn/Lgr5/Tlr2/Ankrd6/Ptk7/Wnt5a/Cdk14/Ror2/Gprc5b/Mertk/Frzb/Isl1/Thra/Smad3/Dkk3/Wls/Mdfic/Dact3/Yap1/Tle2/Sfrp1/Shisa6/Bcl9l/Arl6/Dab2ip/Limd1/Tcf7l1/Tle1/Vangl2/Nrarp/Tcf7/Cdh3/Zeb2/Dact1/Csnk1e/Trpm4/Fzd6/Sox2/Nfatc4/Ndp/Amotl1/Lrp5/Mark1	66
BP	GO:0032943	mononuclear cell proliferation	50|1439	247|16518	1.27567e-08	7.47433e-07	ENSMUSG00000022508/ENSMUSG00000027962/ENSMUSG00000014599/ENSMUSG00000031207/ENSMUSG00000023915/ENSMUSG00000067212/ENSMUSG00000024659/ENSMUSG00000018899/ENSMUSG00000021756/ENSMUSG00000024397/ENSMUSG00000050335/ENSMUSG00000026395/ENSMUSG00000053965/ENSMUSG00000027718/ENSMUSG00000026177/ENSMUSG00000001123/ENSMUSG00000019843/ENSMUSG00000016206/ENSMUSG00000039005/ENSMUSG00000040663/ENSMUSG00000066551/…	Bcl6/Vcam1/Csf1/Msn/Tnfrsf21/H2-T23/Anxa1/Irf1/Il6st/Aif1/Lgals3/Ptprc/Pde5a/Il21/Slc11a1/Lgals9/Fyn/H2-M3/Tlr4/Clcf1/Hmgb1/Cd180/Mapk8ip1/P2rx7/Tgfbr2/Cd274/Nckap1l/Rasal3/Cebpb/Lmo1/Cd24a/Cd151/H2-Ab1/Ccdc88b/Lyn/Erbb2/Ptpn6/Myd88/Cd276/Stat5b/Efnb1/Bmp4/Dock2/Prkar1a/Vsir/Cdkn1a/Stat5a/Ripor2/Prkcq/Cd86	50
BP	GO:0050670	regulation of lymphocyte proliferation	42|1439	190|16518	1.31689e-08	7.63378e-07	ENSMUSG00000022508/ENSMUSG00000027962/ENSMUSG00000023915/ENSMUSG00000067212/ENSMUSG00000024659/ENSMUSG00000018899/ENSMUSG00000021756/ENSMUSG00000024397/ENSMUSG00000050335/ENSMUSG00000026395/ENSMUSG00000053965/ENSMUSG00000027718/ENSMUSG00000001123/ENSMUSG00000016206/ENSMUSG00000039005/ENSMUSG00000040663/ENSMUSG00000066551/ENSMUSG00000027223/ENSMUSG00000032440/ENSMUSG00000016496/ENSMUSG00000022488/…	Bcl6/Vcam1/Tnfrsf21/H2-T23/Anxa1/Irf1/Il6st/Aif1/Lgals3/Ptprc/Pde5a/Il21/Lgals9/H2-M3/Tlr4/Clcf1/Hmgb1/Mapk8ip1/Tgfbr2/Cd274/Nckap1l/Rasal3/Cebpb/Lmo1/Cd24a/H2-Ab1/Ccdc88b/Lyn/Erbb2/Ptpn6/Myd88/Cd276/Stat5b/Efnb1/Bmp4/Prkar1a/Vsir/Cdkn1a/Stat5a/Ripor2/Prkcq/Cd86	42
BP	GO:0002758	innate immune response-activating signal transduction	32|1439	124|16518	1.45713e-08	8.35781e-07	ENSMUSG00000037921/ENSMUSG00000020227/ENSMUSG00000030921/ENSMUSG00000007655/ENSMUSG00000020641/ENSMUSG00000069874/ENSMUSG00000057143/ENSMUSG00000040296/ENSMUSG00000026896/ENSMUSG00000029826/ENSMUSG00000018899/ENSMUSG00000027995/ENSMUSG00000059714/ENSMUSG00000036908/ENSMUSG00000001123/ENSMUSG00000039005/ENSMUSG00000043496/ENSMUSG00000066551/ENSMUSG00000052688/ENSMUSG00000006519/ENSMUSG00000059866/…	Ddx60/Irak3/Trim30a/Cav1/Rsad2/Irgm2/Trim12c/Ddx58/Ifih1/Zc3hav1/Irf1/Tlr2/Flot1/Unc93b1/Lgals9/Tlr4/Tril/Hmgb1/Rab7b/Cyba/Tnip2/Lyn/Pik3ap1/Irak1/Myd88/Irak2/Dab2ip/Mapkapk3/Dhx58/Tirap/Trim5/Cd86	32
BP	GO:0051607	defense response to virus	43|1439	198|16518	1.54793e-08	8.78612e-07	ENSMUSG00000034459/ENSMUSG00000037921/ENSMUSG00000029561/ENSMUSG00000030921/ENSMUSG00000057596/ENSMUSG00000074896/ENSMUSG00000025492/ENSMUSG00000024079/ENSMUSG00000033355/ENSMUSG00000020641/ENSMUSG00000062488/ENSMUSG00000022906/ENSMUSG00000057143/ENSMUSG00000040296/ENSMUSG00000035692/ENSMUSG00000026896/ENSMUSG00000029826/ENSMUSG00000024810/ENSMUSG00000074151/ENSMUSG00000034855/ENSMUSG00000018899/…	Ifit1/Ddx60/Oasl2/Trim30a/Trim30d/Ifit3/Ifitm3/Eif2ak2/Rtp4/Rsad2/Ifit3b/Parp9/Trim12c/Ddx58/Isg15/Ifih1/Zc3hav1/Il33/Nlrc5/Cxcl10/Irf1/Stat1/Bst2/Slfn8/Irf5/Dtx3l/Ptprc/Trim12a/Gbp4/Oas1a/Oas2/Slfn9/Mx2/Stat2/Apobec1/Tmem173/A230050P20Rik/Oas1b/Dhx58/Apobec3/Trim5/Ifnlr1/Cd86	43
BP	GO:0097529	myeloid leukocyte migration	37|1439	157|16518	1.59504e-08	8.87127e-07	ENSMUSG00000028635/ENSMUSG00000014599/ENSMUSG00000000957/ENSMUSG00000026072/ENSMUSG00000024659/ENSMUSG00000030669/ENSMUSG00000034855/ENSMUSG00000041120/ENSMUSG00000057729/ENSMUSG00000024397/ENSMUSG00000064210/ENSMUSG00000050335/ENSMUSG00000002897/ENSMUSG00000039239/ENSMUSG00000021464/ENSMUSG00000035776/ENSMUSG00000066551/ENSMUSG00000035385/ENSMUSG00000033542/ENSMUSG00000022488/ENSMUSG00000059883/…	Edn2/Csf1/Mmp14/Il1r1/Anxa1/Calca/Cxcl10/Nbl1/Prtn3/Aif1/Ano6/Lgals3/Il17ra/Tgfb2/Ror2/Cd99l2/Hmgb1/Ccl2/Arhgef5/Nckap1l/Irak4/Lyn/Ccl12/Myd88/Cx3cl1/Stat5b/P2ry12/Jam3/Itga9/Fcer1g/Ccl9/Vav1/Slit2/Emilin1/Ripor2/Il17rc/Pde4b	37
BP	GO:0050863	regulation of T cell activation	51|1439	256|16518	1.59549e-08	8.87127e-07	ENSMUSG00000007655/ENSMUSG00000022508/ENSMUSG00000027962/ENSMUSG00000055447/ENSMUSG00000023915/ENSMUSG00000067212/ENSMUSG00000019982/ENSMUSG00000024659/ENSMUSG00000018899/ENSMUSG00000021756/ENSMUSG00000024397/ENSMUSG00000050335/ENSMUSG00000026395/ENSMUSG00000053965/ENSMUSG00000027718/ENSMUSG00000030124/ENSMUSG00000001123/ENSMUSG00000061981/ENSMUSG00000016206/ENSMUSG00000066551/ENSMUSG00000027223/…	Cav1/Bcl6/Vcam1/Cd47/Tnfrsf21/H2-T23/Myb/Anxa1/Irf1/Il6st/Aif1/Lgals3/Ptprc/Pde5a/Il21/Lag3/Lgals9/Flot2/H2-M3/Hmgb1/Mapk8ip1/Tgfbr2/Ccl2/Cd274/Nckap1l/Rasal3/Cebpb/Lmo1/Cd24a/H2-Ab1/Gsn/Ccdc88b/Erbb2/Lgals1/Ptpn6/Cd276/Stat5b/Efnb1/Bmp4/Prkar1a/Zmiz1/Nrarp/Vsir/Pag1/Zfp608/Efnb2/Fam49b/Stat5a/Ripor2/Prkcq/Cd86	51
BP	GO:0007265	Ras protein signal transduction	68|1439	388|16518	1.75778e-08	9.67491e-07	ENSMUSG00000026923/ENSMUSG00000028583/ENSMUSG00000022508/ENSMUSG00000021701/ENSMUSG00000014599/ENSMUSG00000038816/ENSMUSG00000002985/ENSMUSG00000001507/ENSMUSG00000017466/ENSMUSG00000041498/ENSMUSG00000024998/ENSMUSG00000046768/ENSMUSG00000050271/ENSMUSG00000023460/ENSMUSG00000001313/ENSMUSG00000037211/ENSMUSG00000031841/ENSMUSG00000024397/ENSMUSG00000015243/ENSMUSG00000040479/ENSMUSG00000022469/…	Notch1/Pdpn/Bcl6/Plk2/Csf1/Ctnnal1/Apoe/Itga3/Timp2/Kif14/Plce1/Rhoj/Prag1/Rab12/Rnd2/Spry1/Cdh13/Aif1/Abca1/Dgkz/Rapgef3/Rhoc/Pdgfrb/Arhgef19/Arhgef40/Arhgef4/Arhgap42/Flot1/Rhoq/Farp1/Sdcbp/Tgfb2/Notch2/Rnd3/Rab7b/Rock2/Arhgef10/Arhgef5/Rasal3/Cyth4/Rasa4/Rasa2/Cdc42ep4/Arhgef17/Plekhg1/Rab3d/Erbb2/Rras2/Itgb1/Arl6/Dab2ip/Cdc42se1/Dock2/Abr/Net1/Trio/Kitl/Col1a2/Plekhg6/Vangl2/Rhobtb3/Vav1/Rab3…	68
BP	GO:0006874	cellular calcium ion homeostasis	72|1439	421|16518	1.91022e-08	1.0401e-06	ENSMUSG00000037225/ENSMUSG00000028635/ENSMUSG00000032648/ENSMUSG00000007655/ENSMUSG00000052336/ENSMUSG00000037820/ENSMUSG00000002985/ENSMUSG00000029231/ENSMUSG00000030669/ENSMUSG00000034855/ENSMUSG00000028036/ENSMUSG00000052920/ENSMUSG00000021756/ENSMUSG00000027712/ENSMUSG00000021057/ENSMUSG00000022892/ENSMUSG00000034462/ENSMUSG00000003161/ENSMUSG00000056073/ENSMUSG00000027087/ENSMUSG00000026395/…	Fgf2/Edn2/Pygm/Cav1/Cx3cr1/Tgm2/Apoe/Pdgfra/Calca/Cxcl10/Ptgfr/Prkg1/Il6st/Anxa5/Akap5/App/Pkd2/Sri/Grik2/Itgav/Ptprc/Hexb/Cacnb3/Wnt5a/Asph/Fyn/Tgfb2/Hmgb1/P2rx7/Ccl2/Prkcb/Oxtr/Gria1/Dmpk/Anxa2/Itpr3/Cyba/Smad3/Cd24a/Plcg1/Kcna5/Cacna1a/Jph1/Tpcn2/Lyn/Ccl12/Anxa6/Plcd1/Ptpn6/Capn3/Cx3cl1/Cacna1g/Ccr5/Ccl28/Adora1/Bmp4/Kctd17/Gpr157/Tmem165/Cib2/Itpr1/S100b/1600014C10Rik/Pth1r/Pik3cg/Tpcn1/Trpm1…	72
BP	GO:0050673	epithelial cell proliferation	65|1439	365|16518	1.92789e-08	1.0401e-06	ENSMUSG00000037225/ENSMUSG00000004040/ENSMUSG00000026923/ENSMUSG00000031565/ENSMUSG00000007655/ENSMUSG00000016918/ENSMUSG00000002985/ENSMUSG00000000957/ENSMUSG00000062960/ENSMUSG00000026204/ENSMUSG00000018593/ENSMUSG00000044786/ENSMUSG00000027168/ENSMUSG00000029838/ENSMUSG00000041075/ENSMUSG00000026185/ENSMUSG00000026104/ENSMUSG00000006800/ENSMUSG00000031841/ENSMUSG00000020122/ENSMUSG00000000567/…	Fgf2/Stat3/Notch1/Fgfr1/Cav1/Sulf1/Apoe/Mmp14/Kdr/Ptprn/Sparc/Zfp36/Pax6/Ptn/Fzd7/Igfbp5/Stat1/Sulf2/Cdh13/Egfr/Sox9/Lgr5/Smo/Gas1/Ccnd2/Itga4/Wnt5a/Stat6/Tgfb2/Nfib/Cdk6/Hmgb1/Isl1/Ccl2/Thbs1/Cyba/Cebpb/Smad3/Plcg1/Zfp36l1/Yap1/Epha2/Erbb2/Ccl12/Sfrp1/Ift57/Dab2ip/Eppk1/Bmp4/Fgfr2/Cd34/Wdr13/Nrarp/Rps6ka1/Cav2/Irf6/Efnb2/Ptprk/Npm1/Cdh3/Stat5a/Ang/Ctsl/Hmox1/Sox2	65
CC	GO:0098802	plasma membrane receptor complex	37|1463	160|16707	3.12752e-08	1.05119e-06	ENSMUSG00000022146/ENSMUSG00000060802/ENSMUSG00000035200/ENSMUSG00000025321/ENSMUSG00000032172/ENSMUSG00000001507/ENSMUSG00000001985/ENSMUSG00000021756/ENSMUSG00000025892/ENSMUSG00000032554/ENSMUSG00000056073/ENSMUSG00000027087/ENSMUSG00000027995/ENSMUSG00000000290/ENSMUSG00000026833/ENSMUSG00000028249/ENSMUSG00000027009/ENSMUSG00000030786/ENSMUSG00000005640/ENSMUSG00000026836/ENSMUSG00000023348/…	Osmr/B2m/Chrnb4/Itgb8/Olfm2/Itga3/Grik3/Il6st/Gria4/Trf/Grik2/Itgav/Tlr2/Itgb2/Olfm1/Sdcbp/Itga4/Itgam/Insrr/Acvr1/Trip6/Shisa7/Gria1/Gria3/Lyn/Dlgap3/Htr3a/Ptpn6/Shisa6/Itgb1/Itga9/Ramp1/Shisa8/Itga6/Emilin1/Itgb5/Ifnlr1	37
BP	GO:0061448	connective tissue development	49|1439	243|16518	2.02836e-08	1.08358e-06	ENSMUSG00000037225/ENSMUSG00000026923/ENSMUSG00000005087/ENSMUSG00000031565/ENSMUSG00000019997/ENSMUSG00000016918/ENSMUSG00000022098/ENSMUSG00000014599/ENSMUSG00000020467/ENSMUSG00000025321/ENSMUSG00000028195/ENSMUSG00000022483/ENSMUSG00000006800/ENSMUSG00000055737/ENSMUSG00000000567/ENSMUSG00000001131/ENSMUSG00000026837/ENSMUSG00000070436/ENSMUSG00000022324/ENSMUSG00000031367/ENSMUSG00000021994/…	Fgf2/Notch1/Cd44/Fgfr1/Ctgf/Sulf1/Bmp1/Csf1/Efemp1/Itgb8/Cyr61/Col2a1/Sulf2/Ghr/Sox9/Timp1/Col5a1/Serpinh1/Matn2/Ap1s2/Wnt5a/Tgfb2/Oxct1/Nfib/Ror2/Vit/Evc/Tgfbr2/Frzb/Lmna/Anxa2/Thra/Smad3/Maf/Sox6/Sh3pxd2b/Anxa6/Csgalnact1/Bmp4/Cd34/Coch/Id4/Pla2g16/Pth1r/Arid5a/Col11a1/Trpm4/Arid5b/Lrp5	49
BP	GO:0051961	negative regulation of nervous system development	58|1439	311|16518	2.08258e-08	1.10174e-06	ENSMUSG00000004040/ENSMUSG00000020932/ENSMUSG00000036030/ENSMUSG00000026923/ENSMUSG00000061232/ENSMUSG00000060802/ENSMUSG00000073411/ENSMUSG00000026728/ENSMUSG00000007655/ENSMUSG00000021701/ENSMUSG00000020467/ENSMUSG00000031328/ENSMUSG00000002985/ENSMUSG00000070509/ENSMUSG00000050271/ENSMUSG00000023915/ENSMUSG00000027168/ENSMUSG00000029838/ENSMUSG00000022892/ENSMUSG00000069171/ENSMUSG00000000567/…	Stat3/Gfap/Prtg/Notch1/H2-K1/B2m/H2-D1/Vim/Cav1/Plk2/Efemp1/Flna/Apoe/Rgma/Prag1/Tnfrsf21/Pax6/Ptn/App/Nr2f1/Sox9/Dll1/Six3/Tulp3/Map4k4/Sema3e/Wnt5a/Ptprz1/Isl1/Inpp5f/Efna1/Cd24a/Notch3/Lgals1/Sema6a/Lrp1/Stmn2/Trim46/Itgb1/Abcc8/Ccr5/Idh2/Rtn4rl2/Bmp4/Prkacb/Tspo/Rtn4rl1/Sema4g/Lingo1/Id4/Efnb2/Ctdsp1/Slit2/2900011O08Rik/Dab1/Nfatc4/Inppl1/Ctsz	58
BP	GO:0006816	calcium ion transport	67|1439	382|16518	2.17003e-08	1.13697e-06	ENSMUSG00000037225/ENSMUSG00000037405/ENSMUSG00000007655/ENSMUSG00000019997/ENSMUSG00000019982/ENSMUSG00000032562/ENSMUSG00000034855/ENSMUSG00000028255/ENSMUSG00000044080/ENSMUSG00000027712/ENSMUSG00000021057/ENSMUSG00000017400/ENSMUSG00000015968/ENSMUSG00000031517/ENSMUSG00000034462/ENSMUSG00000003161/ENSMUSG00000010066/ENSMUSG00000064210/ENSMUSG00000022469/ENSMUSG00000027087/ENSMUSG00000050335/…	Fgf2/Icam1/Cav1/Ctgf/Myb/Gnai2/Cxcl10/Clca1/S100a1/Anxa5/Akap5/Stac2/Cacna1d/Gpm6a/Pkd2/Sri/Cacna2d2/Ano6/Rapgef3/Itgav/Lgals3/Ptprc/Cacnb3/Asph/Fyn/Tgfb2/Ahnak/P2rx7/Prkcb/Anxa2/Cacna1b/Itpr3/Cyba/Plcg1/Cacna1a/Jph1/Cacnb4/Tpcn2/Lyn/Gem/Ccl12/Anxa6/Ptpn6/Capn3/Cx3cl1/Cacna1g/Camk2b/Ccr5/P2ry12/Rgs4/Bmp4/Tspo/Tmem165/Itpr1/Ramp1/Ptgs2/Camk2a/Pik3cg/Tpcn1/Trpm1/Camk2g/Slc8b1/Trpm4/Slc24a2/Selenon/…	67
BP	GO:0045766	positive regulation of angiogenesis	37|1439	159|16518	2.28473e-08	1.18566e-06	ENSMUSG00000037225/ENSMUSG00000004040/ENSMUSG00000030341/ENSMUSG00000064246/ENSMUSG00000024087/ENSMUSG00000021701/ENSMUSG00000052336/ENSMUSG00000023031/ENSMUSG00000025321/ENSMUSG00000062960/ENSMUSG00000046768/ENSMUSG00000032359/ENSMUSG00000024659/ENSMUSG00000044080/ENSMUSG00000022475/ENSMUSG00000014773/ENSMUSG00000022469/ENSMUSG00000031714/ENSMUSG00000000290/ENSMUSG00000021994/ENSMUSG00000066551/…	Fgf2/Stat3/Tnfrsf1a/Chil1/Cyp1b1/Plk2/Cx3cr1/Cela1/Itgb8/Kdr/Rhoj/Ctsh/Anxa1/S100a1/Hdac7/Dll1/Rapgef3/Gab1/Itgb2/Wnt5a/Hmgb1/Tgfbr2/Ddah1/Isl1/Prkcb/Sash1/Thbs1/Plcg1/C3/Cx3cl1/Itgb1/Adam12/Cd34/Ptgs2/Jup/Hmox1/Rras	37
BP	GO:1903827	regulation of cellular protein localization	80|1439	489|16518	2.37919e-08	1.22304e-06	ENSMUSG00000030341/ENSMUSG00000049493/ENSMUSG00000064215/ENSMUSG00000031328/ENSMUSG00000034394/ENSMUSG00000022906/ENSMUSG00000000957/ENSMUSG00000001507/ENSMUSG00000031207/ENSMUSG00000029838/ENSMUSG00000027499/ENSMUSG00000030662/ENSMUSG00000021057/ENSMUSG00000017400/ENSMUSG00000031837/ENSMUSG00000020122/ENSMUSG00000033170/ENSMUSG00000022469/ENSMUSG00000023992/ENSMUSG00000050335/ENSMUSG00000049502/…	Tnfrsf1a/Pls1/Ifi27/Flna/Lif/Parp9/Mmp14/Itga3/Msn/Ptn/Pkia/Ipo5/Akap5/Stac2/Necab2/Egfr/Card10/Rapgef3/Trem2/Lgals3/Dtx3l/Smo/Rhoq/Sec16b/Cacnb3/Wnt5a/Glis2/Asph/Fyn/Tgfb2/Bag3/Lcp1/Gbp4/Shisa7/Lmna/Rock2/Ccl2/Siah3/Ptpn1/Acsl3/Spidr/Ezr/Mdfic/Cacnb4/Gsn/Epha2/Dclk2/Erbb2/Lrp1/Prr5l/Shisa6/Trim46/Gnai1/Itgb1/Camk2b/Dmtn/Bmp4/Camk1/Zic1/Rapgef4/Gpc4/Myo1c/Fcer1g/Tmem173/Ptgs2/Clip3/Cav2/Camk2a/Sp…	80
CC	GO:0030027	lamellipodium	40|1463	182|16707	3.97441e-08	1.26554e-06	ENSMUSG00000026923/ENSMUSG00000005087/ENSMUSG00000028583/ENSMUSG00000022272/ENSMUSG00000020388/ENSMUSG00000030123/ENSMUSG00000043850/ENSMUSG00000022892/ENSMUSG00000034462/ENSMUSG00000034573/ENSMUSG00000021676/ENSMUSG00000024397/ENSMUSG00000040479/ENSMUSG00000022469/ENSMUSG00000027087/ENSMUSG00000059714/ENSMUSG00000061981/ENSMUSG00000058056/ENSMUSG00000068748/ENSMUSG00000031626/ENSMUSG00000038453/…	Notch1/Cd44/Pdpn/Myo10/Pdlim4/Plxnd1/Clrn1/App/Pkd2/Ptpn13/Iqgap2/Aif1/Dgkz/Rapgef3/Itgav/Flot1/Flot2/Palld/Ptprz1/Sorbs2/Srcin1/Ctnna2/Plcg1/Gsn/Epha2/Ajuba/Stmn2/Ablim3/Itgb1/Mtss1l/Kitl/Plekhh2/Arpin/Arap3/Dbn1/Gdpd2/Antxr1/Fat1/Inppl1/Amotl1	40
BP	GO:0010810	regulation of cell-substrate adhesion	42|1439	194|16518	2.49584e-08	1.27101e-06	ENSMUSG00000026923/ENSMUSG00000028583/ENSMUSG00000022508/ENSMUSG00000003534/ENSMUSG00000037736/ENSMUSG00000014599/ENSMUSG00000031328/ENSMUSG00000000957/ENSMUSG00000001507/ENSMUSG00000062960/ENSMUSG00000029838/ENSMUSG00000041075/ENSMUSG00000028195/ENSMUSG00000031841/ENSMUSG00000058325/ENSMUSG00000041959/ENSMUSG00000035258/ENSMUSG00000063531/ENSMUSG00000025314/ENSMUSG00000068748/ENSMUSG00000024076/…	Notch1/Pdpn/Bcl6/Ddr1/Limch1/Csf1/Flna/Mmp14/Itga3/Kdr/Ptn/Fzd7/Cyr61/Cdh13/Dock1/S100a10/Abi3bp/Sema3e/Ptprj/Ptprz1/Vit/Cdk6/Thbs1/Smad3/Myadm/Enpp2/Lgals1/Fn1/Itgb1/Dmtn/Ccl28/Arhgap6/Emid1/Onecut2/Ajap1/Gcnt2/Jup/Itga6/Emilin1/Ndnf/Dbn1/Rsu1	42
BP	GO:0070838	divalent metal ion transport	73|1439	432|16518	2.54116e-08	1.28211e-06	ENSMUSG00000037225/ENSMUSG00000037405/ENSMUSG00000034248/ENSMUSG00000007655/ENSMUSG00000019997/ENSMUSG00000019982/ENSMUSG00000032562/ENSMUSG00000034855/ENSMUSG00000028255/ENSMUSG00000044080/ENSMUSG00000027712/ENSMUSG00000021057/ENSMUSG00000017400/ENSMUSG00000015968/ENSMUSG00000031517/ENSMUSG00000034462/ENSMUSG00000003161/ENSMUSG00000010066/ENSMUSG00000064210/ENSMUSG00000022469/ENSMUSG00000027087/…	Fgf2/Icam1/Slc25a37/Cav1/Ctgf/Myb/Gnai2/Cxcl10/Clca1/S100a1/Anxa5/Akap5/Stac2/Cacna1d/Gpm6a/Pkd2/Sri/Cacna2d2/Ano6/Rapgef3/Itgav/Lgals3/Ptprc/Slc41a1/Slc11a1/Cacnb3/Asph/Fyn/Tgfb2/Ahnak/P2rx7/Prkcb/Slc39a12/Anxa2/Cacna1b/Itpr3/Cyba/Plcg1/Cacna1a/Jph1/Cacnb4/Tpcn2/Lyn/Gem/Slc39a1/Ccl12/Anxa6/Ptpn6/Capn3/Cx3cl1/Cacna1g/Camk2b/Ccr5/P2ry12/Rgs4/Bmp4/Tspo/Tmem165/Itpr1/Ramp1/Ptgs2/Nipal2/Camk2a/Pik3cg…	73
BP	GO:0046651	lymphocyte proliferation	49|1439	245|16518	2.669e-08	1.33426e-06	ENSMUSG00000022508/ENSMUSG00000027962/ENSMUSG00000031207/ENSMUSG00000023915/ENSMUSG00000067212/ENSMUSG00000024659/ENSMUSG00000018899/ENSMUSG00000021756/ENSMUSG00000024397/ENSMUSG00000050335/ENSMUSG00000026395/ENSMUSG00000053965/ENSMUSG00000027718/ENSMUSG00000026177/ENSMUSG00000001123/ENSMUSG00000019843/ENSMUSG00000016206/ENSMUSG00000039005/ENSMUSG00000040663/ENSMUSG00000066551/ENSMUSG00000021624/…	Bcl6/Vcam1/Msn/Tnfrsf21/H2-T23/Anxa1/Irf1/Il6st/Aif1/Lgals3/Ptprc/Pde5a/Il21/Slc11a1/Lgals9/Fyn/H2-M3/Tlr4/Clcf1/Hmgb1/Cd180/Mapk8ip1/P2rx7/Tgfbr2/Cd274/Nckap1l/Rasal3/Cebpb/Lmo1/Cd24a/Cd151/H2-Ab1/Ccdc88b/Lyn/Erbb2/Ptpn6/Myd88/Cd276/Stat5b/Efnb1/Bmp4/Dock2/Prkar1a/Vsir/Cdkn1a/Stat5a/Ripor2/Prkcq/Cd86	49
BP	GO:0033002	muscle cell proliferation	45|1439	216|16518	2.7431e-08	1.35883e-06	ENSMUSG00000037225/ENSMUSG00000004040/ENSMUSG00000026923/ENSMUSG00000022893/ENSMUSG00000031565/ENSMUSG00000007655/ENSMUSG00000016918/ENSMUSG00000037820/ENSMUSG00000026678/ENSMUSG00000019982/ENSMUSG00000026185/ENSMUSG00000032562/ENSMUSG00000019789/ENSMUSG00000052920/ENSMUSG00000031841/ENSMUSG00000020122/ENSMUSG00000024397/ENSMUSG00000021555/ENSMUSG00000024620/ENSMUSG00000024014/ENSMUSG00000039239/…	Fgf2/Stat3/Notch1/Adamts1/Fgfr1/Cav1/Sulf1/Tgm2/Rgs5/Myb/Igfbp5/Gnai2/Hey2/Prkg1/Cdh13/Egfr/Aif1/Naa35/Pdgfrb/Pim1/Tgfb2/Tgfbr2/Gnai3/Trib1/Thbs1/Cyba/Irak4/Rbpms2/Notch3/Yap1/Abcc4/Irak1/Myd88/Cx3cl1/Stat5b/Comt/Bmp4/Fgfr2/Prkar1a/Map3k5/Ptgs2/Cdkn1a/Ang/Hmox1/Selenon	45
BP	GO:0055074	calcium ion homeostasis	73|1439	433|16518	2.80317e-08	1.36184e-06	ENSMUSG00000037225/ENSMUSG00000028635/ENSMUSG00000032648/ENSMUSG00000007655/ENSMUSG00000052336/ENSMUSG00000037820/ENSMUSG00000002985/ENSMUSG00000029231/ENSMUSG00000030669/ENSMUSG00000034855/ENSMUSG00000028036/ENSMUSG00000052920/ENSMUSG00000021756/ENSMUSG00000027712/ENSMUSG00000021057/ENSMUSG00000022892/ENSMUSG00000034462/ENSMUSG00000003161/ENSMUSG00000056073/ENSMUSG00000027087/ENSMUSG00000026395/…	Fgf2/Edn2/Pygm/Cav1/Cx3cr1/Tgm2/Apoe/Pdgfra/Calca/Cxcl10/Ptgfr/Prkg1/Il6st/Anxa5/Akap5/App/Pkd2/Sri/Grik2/Itgav/Ptprc/Hexb/Cacnb3/Wnt5a/Asph/Fyn/Tgfb2/Hmgb1/P2rx7/Ccl2/Prkcb/Oxtr/Gria1/Dmpk/Anxa2/Itpr3/Cyba/Smad3/Cd24a/Plcg1/Kcna5/Cacna1a/Jph1/Tpcn2/Lyn/Ccl12/Anxa6/Plcd1/Ptpn6/Capn3/Cx3cl1/Cacna1g/Ccr5/Ccl28/Adora1/Bmp4/Kctd17/Gpr157/Tmem165/Cib2/Tmtc2/Itpr1/S100b/1600014C10Rik/Pth1r/Pik3cg/Tpcn1…	73
BP	GO:0032760	positive regulation of tumor necrosis factor production	23|1439	73|16518	2.80814e-08	1.36184e-06	ENSMUSG00000022037/ENSMUSG00000030341/ENSMUSG00000040296/ENSMUSG00000026896/ENSMUSG00000067212/ENSMUSG00000026395/ENSMUSG00000021994/ENSMUSG00000001123/ENSMUSG00000039005/ENSMUSG00000052914/ENSMUSG00000066551/ENSMUSG00000042258/ENSMUSG00000035385/ENSMUSG00000040152/ENSMUSG00000006519/ENSMUSG00000038058/ENSMUSG00000032508/ENSMUSG00000040136/ENSMUSG00000079227/ENSMUSG00000058715/ENSMUSG00000032041/…	Clu/Tnfrsf1a/Ddx58/Ifih1/H2-T23/Ptprc/Wnt5a/Lgals9/Tlr4/Cyp2j6/Hmgb1/Isl1/Ccl2/Thbs1/Cyba/Nod1/Myd88/Abcc8/Ccr5/Fcer1g/Tirap/Arid5a/Nfatc4	23
BP	GO:1903039	positive regulation of leukocyte cell-cell adhesion	38|1439	167|16518	2.82415e-08	1.36184e-06	ENSMUSG00000005087/ENSMUSG00000037405/ENSMUSG00000007655/ENSMUSG00000022508/ENSMUSG00000027962/ENSMUSG00000055447/ENSMUSG00000067212/ENSMUSG00000019982/ENSMUSG00000024659/ENSMUSG00000018899/ENSMUSG00000021756/ENSMUSG00000024397/ENSMUSG00000026395/ENSMUSG00000027718/ENSMUSG00000027009/ENSMUSG00000001123/ENSMUSG00000061981/ENSMUSG00000016206/ENSMUSG00000066551/ENSMUSG00000032440/ENSMUSG00000035385/…	Cd44/Icam1/Cav1/Bcl6/Vcam1/Cd47/H2-T23/Myb/Anxa1/Irf1/Il6st/Aif1/Ptprc/Il21/Itga4/Lgals9/Flot2/H2-M3/Hmgb1/Tgfbr2/Ccl2/Cd274/Nckap1l/Rasal3/Cd24a/H2-Ab1/Ccdc88b/Lgals1/Cd276/Stat5b/Efnb1/Zmiz1/Vsir/Efnb2/Fam49b/Stat5a/Prkcq/Cd86	38
BP	GO:0007409	axonogenesis	69|1439	401|16518	2.94602e-08	1.40815e-06	ENSMUSG00000036030/ENSMUSG00000026923/ENSMUSG00000030077/ENSMUSG00000026728/ENSMUSG00000030123/ENSMUSG00000002985/ENSMUSG00000056427/ENSMUSG00000070509/ENSMUSG00000058897/ENSMUSG00000027168/ENSMUSG00000024621/ENSMUSG00000001313/ENSMUSG00000022892/ENSMUSG00000026640/ENSMUSG00000021068/ENSMUSG00000045136/ENSMUSG00000041936/ENSMUSG00000034616/ENSMUSG00000001761/ENSMUSG00000031673/ENSMUSG00000026833/…	Prtg/Notch1/Chl1/Vim/Plxnd1/Apoe/Slit3/Rgma/Col25a1/Pax6/Csf1r/Rnd2/App/Plxna2/Nin/Tubb2b/Agrn/Ssh3/Smo/Cdh11/Olfm1/Gas1/Dock7/Flot1/Matn2/Sema3e/Sptbn4/Itga4/Wnt5a/Ntrk2/Tgfb2/Mgll/Palld/Nfib/Ptprz1/Lamb2/Isl1/Efna1/Ctnna2/Plxna1/Flrt3/Kif5a/Cacna1a/Erbb2/Sema6a/Trim46/Chn1/Amigo1/Efnb1/Fn1/Plxnb2/Cobl/Itgb1/Boc/Ccr5/Gap43/Vangl2/Ache/Sema4g/Slitrk5/Ttl/Slc9a6/Efnb2/Emb/Slit2/Dbn1/Zeb2/Dab1/Unc5d	69
CC	GO:0005911	cell-cell junction	71|1463	420|16707	4.80198e-08	1.4526e-06	ENSMUSG00000031328/ENSMUSG00000022656/ENSMUSG00000043079/ENSMUSG00000040296/ENSMUSG00000038235/ENSMUSG00000033161/ENSMUSG00000027712/ENSMUSG00000022892/ENSMUSG00000006411/ENSMUSG00000031841/ENSMUSG00000068876/ENSMUSG00000034462/ENSMUSG00000031673/ENSMUSG00000035805/ENSMUSG00000059714/ENSMUSG00000023972/ENSMUSG00000011751/ENSMUSG00000017167/ENSMUSG00000061981/ENSMUSG00000062373/ENSMUSG00000052062/…	Flna/Nectin3/Synpo/Ddx58/F11r/Atp1a1/Anxa5/App/Nectin4/Cdh13/Cgn/Pkd2/Cdh11/Mlc1/Flot1/Ptk7/Sptbn4/Cntnap1/Flot2/Tmem65/Pard3b/Pvr/Ptprj/Cd99l2/Ahnak/Zyx/P2rx7/Lsr/Oxtr/Ctnna2/Frmd4a/Kazn/Cadm3/Flrt3/Plcg1/Cd53/Kcna5/Lin7b/Myadm/Arvcf/Cdc42ep4/Lyn/Epha2/Ajuba/Anxa6/Ptpn6/Itgb1/Pcdh1/Limd1/Eppk1/Prkch/Jam3/Vangl2/Ajap1/Scn1a/Plxdc1/Hmcn1/Lama1/Vav1/Magi1/Tjp3/Ptprk/Jup/Cdh3/Itga6/Dbn1/Perp/Igsf21/…	71
BP	GO:0072657	protein localization to membrane	79|1439	484|16518	3.22728e-08	1.52917e-06	ENSMUSG00000030341/ENSMUSG00000033355/ENSMUSG00000049493/ENSMUSG00000031328/ENSMUSG00000002985/ENSMUSG00000000957/ENSMUSG00000001507/ENSMUSG00000022656/ENSMUSG00000044716/ENSMUSG00000056515/ENSMUSG00000029838/ENSMUSG00000037031/ENSMUSG00000038235/ENSMUSG00000015647/ENSMUSG00000021057/ENSMUSG00000017400/ENSMUSG00000031837/ENSMUSG00000020122/ENSMUSG00000032412/ENSMUSG00000041936/ENSMUSG00000001827/…	Tnfrsf1a/Rtp4/Pls1/Flna/Apoe/Mmp14/Itga3/Nectin3/Dok7/Rab31/Ptn/Tspan15/F11r/Lama5/Akap5/Stac2/Necab2/Egfr/Atp1b3/Agrn/Folr1/Grik2/Trem2/Lgals3/S100a10/Flot1/Rhoq/Tulp3/Sptbn4/Itga4/Cacnb3/Flot2/Fyn/Palm/Shisa7/Rock2/Ccl2/Fyb/Anxa2/Cd24a/Lin7b/Acsl3/Myadm/Ezr/Cacna1a/Sh3pxd2b/Gsn/Reep1/Epha2/Rab3d/Erbb2/Lrp1/Shisa6/Capn3/Itgb1/Camk2b/Arl6/Dmtn/Adora1/Rapgef4/Gpc4/Myo1c/Fcer1g/Ramp1/Clip3/Camk2a/E…	79
BP	GO:0072511	divalent inorganic cation transport	73|1439	435|16518	3.40624e-08	1.59119e-06	ENSMUSG00000037225/ENSMUSG00000037405/ENSMUSG00000034248/ENSMUSG00000007655/ENSMUSG00000019997/ENSMUSG00000019982/ENSMUSG00000032562/ENSMUSG00000034855/ENSMUSG00000028255/ENSMUSG00000044080/ENSMUSG00000027712/ENSMUSG00000021057/ENSMUSG00000017400/ENSMUSG00000015968/ENSMUSG00000031517/ENSMUSG00000034462/ENSMUSG00000003161/ENSMUSG00000010066/ENSMUSG00000064210/ENSMUSG00000022469/ENSMUSG00000027087/…	Fgf2/Icam1/Slc25a37/Cav1/Ctgf/Myb/Gnai2/Cxcl10/Clca1/S100a1/Anxa5/Akap5/Stac2/Cacna1d/Gpm6a/Pkd2/Sri/Cacna2d2/Ano6/Rapgef3/Itgav/Lgals3/Ptprc/Slc41a1/Slc11a1/Cacnb3/Asph/Fyn/Tgfb2/Ahnak/P2rx7/Prkcb/Slc39a12/Anxa2/Cacna1b/Itpr3/Cyba/Plcg1/Cacna1a/Jph1/Cacnb4/Tpcn2/Lyn/Gem/Slc39a1/Ccl12/Anxa6/Ptpn6/Capn3/Cx3cl1/Cacna1g/Camk2b/Ccr5/P2ry12/Rgs4/Bmp4/Tspo/Tmem165/Itpr1/Ramp1/Ptgs2/Nipal2/Camk2a/Pik3cg…	73
BP	GO:0048661	positive regulation of smooth muscle cell proliferation	28|1439	103|16518	3.41657e-08	1.59119e-06	ENSMUSG00000037225/ENSMUSG00000022893/ENSMUSG00000016918/ENSMUSG00000037820/ENSMUSG00000019982/ENSMUSG00000026185/ENSMUSG00000032562/ENSMUSG00000031841/ENSMUSG00000020122/ENSMUSG00000024397/ENSMUSG00000024620/ENSMUSG00000032440/ENSMUSG00000000001/ENSMUSG00000040152/ENSMUSG00000006519/ENSMUSG00000059883/ENSMUSG00000032387/ENSMUSG00000038146/ENSMUSG00000032849/ENSMUSG00000031392/ENSMUSG00000032508/…	Fgf2/Adamts1/Sulf1/Tgm2/Myb/Igfbp5/Gnai2/Cdh13/Egfr/Aif1/Pdgfrb/Tgfbr2/Gnai3/Thbs1/Cyba/Irak4/Rbpms2/Notch3/Abcc4/Irak1/Myd88/Cx3cl1/Stat5b/Bmp4/Fgfr2/Map3k5/Ptgs2/Hmox1	28
BP	GO:0010721	negative regulation of cell development	61|1439	339|16518	3.56184e-08	1.64478e-06	ENSMUSG00000004040/ENSMUSG00000020932/ENSMUSG00000067586/ENSMUSG00000036030/ENSMUSG00000026923/ENSMUSG00000061232/ENSMUSG00000060802/ENSMUSG00000073411/ENSMUSG00000026728/ENSMUSG00000007655/ENSMUSG00000021701/ENSMUSG00000020467/ENSMUSG00000031328/ENSMUSG00000002985/ENSMUSG00000070509/ENSMUSG00000050271/ENSMUSG00000027168/ENSMUSG00000029838/ENSMUSG00000022892/ENSMUSG00000069171/ENSMUSG00000000567/…	Stat3/Gfap/S1pr3/Prtg/Notch1/H2-K1/B2m/H2-D1/Vim/Cav1/Plk2/Efemp1/Flna/Apoe/Rgma/Prag1/Pax6/Ptn/App/Nr2f1/Sox9/Fbn1/Dll1/Six3/Npr2/Map4k4/Sema3e/Wnt5a/Ptprz1/Frzb/Isl1/Inpp5f/Efna1/Cd24a/Notch3/Lgals1/Sema6a/Lrp1/Stmn2/Trim46/Itgb1/Abcc8/Ccr5/Dmtn/Idh2/Rtn4rl2/Rgs4/Bmp4/Tspo/Rtn4rl1/Sema4g/Lingo1/Id4/Efnb2/Ctdsp1/Slit2/2900011O08Rik/Dab1/Nfatc4/Inppl1/Ctsz	61
BP	GO:0048568	embryonic organ development	68|1439	395|16518	3.64062e-08	1.66704e-06	ENSMUSG00000026923/ENSMUSG00000053113/ENSMUSG00000052837/ENSMUSG00000031565/ENSMUSG00000027962/ENSMUSG00000020467/ENSMUSG00000034394/ENSMUSG00000000957/ENSMUSG00000043850/ENSMUSG00000029231/ENSMUSG00000004891/ENSMUSG00000053279/ENSMUSG00000071350/ENSMUSG00000019982/ENSMUSG00000027168/ENSMUSG00000034957/ENSMUSG00000025921/ENSMUSG00000028195/ENSMUSG00000019789/ENSMUSG00000022483/ENSMUSG00000020122/…	Notch1/Socs3/Junb/Fgfr1/Vcam1/Efemp1/Lif/Mmp14/Clrn1/Pdgfra/Nes/Aldh1a1/Setdb2/Myb/Pax6/Cebpa/Rdh10/Cyr61/Hey2/Col2a1/Egfr/Pkd2/Sox9/Fbn1/Folr1/Dll1/Six3/Itgav/Gab1/Smo/Cited1/Gas1/Ptk7/Tulp3/Otx1/Kcnq4/Wnt5a/Slc6a8/Tgfb2/Acvr1/Ror2/Tgfbr2/Frzb/Efna1/Tead2/Cebpb/Smad3/Rbpms2/Zfp36l1/Yap1/Epha2/Slc39a1/Plcd1/Ift57/Cobl/Bmp4/Fgfr2/Abr/Kitl/Zic1/Lrig1/Vangl2/St14/Pcgf2/Tcf7/Ripor2/Col11a1/Fzd6	68
BP	GO:1903557	positive regulation of tumor necrosis factor superfamily cytokine production	23|1439	74|16518	3.74151e-08	1.69896e-06	ENSMUSG00000022037/ENSMUSG00000030341/ENSMUSG00000040296/ENSMUSG00000026896/ENSMUSG00000067212/ENSMUSG00000026395/ENSMUSG00000021994/ENSMUSG00000001123/ENSMUSG00000039005/ENSMUSG00000052914/ENSMUSG00000066551/ENSMUSG00000042258/ENSMUSG00000035385/ENSMUSG00000040152/ENSMUSG00000006519/ENSMUSG00000038058/ENSMUSG00000032508/ENSMUSG00000040136/ENSMUSG00000079227/ENSMUSG00000058715/ENSMUSG00000032041/…	Clu/Tnfrsf1a/Ddx58/Ifih1/H2-T23/Ptprc/Wnt5a/Lgals9/Tlr4/Cyp2j6/Hmgb1/Isl1/Ccl2/Thbs1/Cyba/Nod1/Myd88/Abcc8/Ccr5/Fcer1g/Tirap/Arid5a/Nfatc4	23
BP	GO:0050768	negative regulation of neurogenesis	55|1439	293|16518	3.82626e-08	1.72308e-06	ENSMUSG00000004040/ENSMUSG00000020932/ENSMUSG00000036030/ENSMUSG00000026923/ENSMUSG00000061232/ENSMUSG00000060802/ENSMUSG00000073411/ENSMUSG00000026728/ENSMUSG00000007655/ENSMUSG00000021701/ENSMUSG00000020467/ENSMUSG00000031328/ENSMUSG00000002985/ENSMUSG00000070509/ENSMUSG00000050271/ENSMUSG00000027168/ENSMUSG00000029838/ENSMUSG00000022892/ENSMUSG00000069171/ENSMUSG00000000567/ENSMUSG00000014773/…	Stat3/Gfap/Prtg/Notch1/H2-K1/B2m/H2-D1/Vim/Cav1/Plk2/Efemp1/Flna/Apoe/Rgma/Prag1/Pax6/Ptn/App/Nr2f1/Sox9/Dll1/Six3/Map4k4/Sema3e/Wnt5a/Ptprz1/Isl1/Inpp5f/Efna1/Cd24a/Notch3/Lgals1/Sema6a/Lrp1/Stmn2/Trim46/Itgb1/Abcc8/Ccr5/Idh2/Rtn4rl2/Bmp4/Tspo/Rtn4rl1/Sema4g/Lingo1/Id4/Efnb2/Ctdsp1/Slit2/2900011O08Rik/Dab1/Nfatc4/Inppl1/Ctsz	55
BP	GO:0006909	phagocytosis	37|1439	162|16518	3.86195e-08	1.7249e-06	ENSMUSG00000022912/ENSMUSG00000055447/ENSMUSG00000037820/ENSMUSG00000002602/ENSMUSG00000024659/ENSMUSG00000058325/ENSMUSG00000057729/ENSMUSG00000024397/ENSMUSG00000015243/ENSMUSG00000064210/ENSMUSG00000004665/ENSMUSG00000023992/ENSMUSG00000027087/ENSMUSG00000026395/ENSMUSG00000041515/ENSMUSG00000026177/ENSMUSG00000060703/ENSMUSG00000066551/ENSMUSG00000014361/ENSMUSG00000029468/ENSMUSG00000052688/…	Pros1/Cd47/Tgm2/Axl/Anxa1/Dock1/Prtn3/Aif1/Abca1/Ano6/Cnn2/Trem2/Itgav/Ptprc/Irf8/Slc11a1/Cd302/Hmgb1/Mertk/P2rx7/Rab7b/Pld4/Ccl2/Thbs1/Nckap1l/Cyba/C3/Gsn/Itgb1/Cdc42se1/Dock2/Abr/Fcer1g/Vav1/Adgrb1/Hck/Syt11	37
BP	GO:0060828	regulation of canonical Wnt signaling pathway	43|1439	204|16518	3.89362e-08	1.72491e-06	ENSMUSG00000037225/ENSMUSG00000026923/ENSMUSG00000030309/ENSMUSG00000007655/ENSMUSG00000020393/ENSMUSG00000002985/ENSMUSG00000027803/ENSMUSG00000028163/ENSMUSG00000041075/ENSMUSG00000044674/ENSMUSG00000006800/ENSMUSG00000032280/ENSMUSG00000020122/ENSMUSG00000000567/ENSMUSG00000001827/ENSMUSG00000020140/ENSMUSG00000040183/ENSMUSG00000023972/ENSMUSG00000021994/ENSMUSG00000028926/ENSMUSG00000021464/…	Fgf2/Notch1/Caprin2/Cav1/Kremen1/Apoe/Wwtr1/Nfkb1/Fzd7/Fzd1/Sulf2/Tle3/Egfr/Sox9/Folr1/Lgr5/Ankrd6/Ptk7/Wnt5a/Cdk14/Ror2/Gprc5b/Frzb/Isl1/Thra/Smad3/Dkk3/Wls/Dact3/Yap1/Tle2/Sfrp1/Shisa6/Dab2ip/Limd1/Tle1/Nrarp/Cdh3/Dact1/Csnk1e/Trpm4/Fzd6/Sox2	43
BP	GO:0009615	response to virus	51|1439	263|16518	4.01747e-08	1.75293e-06	ENSMUSG00000053175/ENSMUSG00000022037/ENSMUSG00000034459/ENSMUSG00000037921/ENSMUSG00000029561/ENSMUSG00000020227/ENSMUSG00000030921/ENSMUSG00000057596/ENSMUSG00000074896/ENSMUSG00000025492/ENSMUSG00000024079/ENSMUSG00000033355/ENSMUSG00000020641/ENSMUSG00000062488/ENSMUSG00000022906/ENSMUSG00000069874/ENSMUSG00000057143/ENSMUSG00000040296/ENSMUSG00000035692/ENSMUSG00000026896/ENSMUSG00000029826/…	Bcl3/Clu/Ifit1/Ddx60/Oasl2/Irak3/Trim30a/Trim30d/Ifit3/Ifitm3/Eif2ak2/Rtp4/Rsad2/Ifit3b/Parp9/Irgm2/Trim12c/Ddx58/Isg15/Ifih1/Zc3hav1/Il33/Nlrc5/Cxcl10/Irf1/Stat1/Bst2/Ifi27l2a/Slfn8/Irf5/Dtx3l/Ptprc/Trim12a/Lgals9/Gbp4/Ifit2/Oas1a/Oas2/Slfn9/Myd88/Mx2/Stat2/Apobec1/Tmem173/A230050P20Rik/Oas1b/Dhx58/Apobec3/Trim5/Ifnlr1/Cd86	51
BP	GO:1904018	positive regulation of vasculature development	39|1439	176|16518	4.02122e-08	1.75293e-06	ENSMUSG00000037225/ENSMUSG00000004040/ENSMUSG00000026923/ENSMUSG00000030341/ENSMUSG00000064246/ENSMUSG00000024087/ENSMUSG00000021701/ENSMUSG00000052336/ENSMUSG00000023031/ENSMUSG00000025321/ENSMUSG00000062960/ENSMUSG00000046768/ENSMUSG00000032359/ENSMUSG00000024659/ENSMUSG00000044080/ENSMUSG00000022475/ENSMUSG00000014773/ENSMUSG00000022469/ENSMUSG00000031714/ENSMUSG00000000290/ENSMUSG00000021994/…	Fgf2/Stat3/Notch1/Tnfrsf1a/Chil1/Cyp1b1/Plk2/Cx3cr1/Cela1/Itgb8/Kdr/Rhoj/Ctsh/Anxa1/S100a1/Hdac7/Dll1/Rapgef3/Gab1/Itgb2/Wnt5a/Hmgb1/Tgfbr2/Ddah1/Isl1/Prkcb/Sash1/Thbs1/Plcg1/C3/Cx3cl1/Itgb1/Adam12/Cd34/Ptgs2/Efnb2/Jup/Hmox1/Rras	39
BP	GO:0045665	negative regulation of neuron differentiation	46|1439	226|16518	4.06684e-08	1.75875e-06	ENSMUSG00000020932/ENSMUSG00000026923/ENSMUSG00000061232/ENSMUSG00000060802/ENSMUSG00000073411/ENSMUSG00000026728/ENSMUSG00000007655/ENSMUSG00000021701/ENSMUSG00000020467/ENSMUSG00000031328/ENSMUSG00000002985/ENSMUSG00000070509/ENSMUSG00000050271/ENSMUSG00000027168/ENSMUSG00000022892/ENSMUSG00000069171/ENSMUSG00000000567/ENSMUSG00000014773/ENSMUSG00000038805/ENSMUSG00000026074/ENSMUSG00000063531/…	Gfap/Notch1/H2-K1/B2m/H2-D1/Vim/Cav1/Plk2/Efemp1/Flna/Apoe/Rgma/Prag1/Pax6/App/Nr2f1/Sox9/Dll1/Six3/Map4k4/Sema3e/Wnt5a/Ptprz1/Isl1/Inpp5f/Efna1/Cd24a/Notch3/Lgals1/Sema6a/Lrp1/Stmn2/Trim46/Itgb1/Ccr5/Rtn4rl2/Rtn4rl1/Sema4g/Id4/Efnb2/Ctdsp1/Slit2/Dab1/Nfatc4/Inppl1/Ctsz	46
MF	GO:0019838	growth factor binding	34|1421	137|16303	1.53573e-08	1.81216e-06	ENSMUSG00000030111/ENSMUSG00000022146/ENSMUSG00000031502/ENSMUSG00000031565/ENSMUSG00000019997/ENSMUSG00000062960/ENSMUSG00000026072/ENSMUSG00000029231/ENSMUSG00000029838/ENSMUSG00000026185/ENSMUSG00000028195/ENSMUSG00000022483/ENSMUSG00000024940/ENSMUSG00000021756/ENSMUSG00000055737/ENSMUSG00000020122/ENSMUSG00000041936/ENSMUSG00000001870/ENSMUSG00000027087/ENSMUSG00000024620/ENSMUSG00000026837/…	A2m/Osmr/Col4a1/Fgfr1/Ctgf/Kdr/Il1r1/Pdgfra/Ptn/Igfbp5/Cyr61/Col2a1/Ltbp3/Il6st/Ghr/Egfr/Agrn/Ltbp1/Itgav/Pdgfrb/Col5a1/Sdcbp/Ntrk2/Acvr1/Ptprz1/Tgfbr2/Thbs1/Tgfbr3/Htra3/Erbb2/Fgfr2/Col1a2/Itga6/Igfbp6	34
CC	GO:0030055	cell-substrate junction	38|1463	171|16707	6.33831e-08	1.82604e-06	ENSMUSG00000036995/ENSMUSG00000007655/ENSMUSG00000025321/ENSMUSG00000031207/ENSMUSG00000050271/ENSMUSG00000027479/ENSMUSG00000027087/ENSMUSG00000026395/ENSMUSG00000037003/ENSMUSG00000026074/ENSMUSG00000028249/ENSMUSG00000058056/ENSMUSG00000023348/ENSMUSG00000021998/ENSMUSG00000031626/ENSMUSG00000029860/ENSMUSG00000006519/ENSMUSG00000033306/ENSMUSG00000051379/ENSMUSG00000001864/ENSMUSG00000052397/…	Asap3/Cav1/Itgb8/Msn/Prag1/Mapre1/Itgav/Ptprc/Tns2/Map4k4/Sdcbp/Palld/Trip6/Lcp1/Sorbs2/Zyx/Cyba/Lpp/Flrt3/Aif1l/Ezr/Gsn/Tle2/Epha2/Ajuba/Itgb1/Klf11/Limd1/Eppk1/Cib2/Cav2/Itga6/Fblim1/Adgrb1/Hck/Rsu1/Lasp1/Flnb	38
BP	GO:0002696	positive regulation of leukocyte activation	51|1439	264|16518	4.56709e-08	1.95127e-06	ENSMUSG00000007655/ENSMUSG00000022508/ENSMUSG00000027962/ENSMUSG00000055447/ENSMUSG00000000957/ENSMUSG00000002602/ENSMUSG00000067212/ENSMUSG00000024810/ENSMUSG00000019982/ENSMUSG00000034957/ENSMUSG00000024659/ENSMUSG00000018899/ENSMUSG00000021756/ENSMUSG00000022892/ENSMUSG00000024397/ENSMUSG00000041272/ENSMUSG00000026395/ENSMUSG00000027718/ENSMUSG00000021994/ENSMUSG00000002147/ENSMUSG00000001123/…	Cav1/Bcl6/Vcam1/Cd47/Mmp14/Axl/H2-T23/Il33/Myb/Cebpa/Anxa1/Irf1/Il6st/App/Aif1/Tox/Ptprc/Il21/Wnt5a/Stat6/Lgals9/Flot2/H2-M3/Tlr4/Clcf1/Hmgb1/Tgfbr2/Ccl2/Cd274/Thbs1/Nckap1l/Rasal3/Tnip2/Cd24a/H2-Ab1/Ccdc88b/Lgals1/Ttbk1/Myd88/Cd276/Stat5b/Efnb1/Zmiz1/Fcer1g/Vsir/Efnb2/Fam49b/Cdkn1a/Stat5a/Prkcq/Cd86	51
BP	GO:0002685	regulation of leukocyte migration	37|1439	163|16518	4.58365e-08	1.95127e-06	ENSMUSG00000028635/ENSMUSG00000034845/ENSMUSG00000037405/ENSMUSG00000014599/ENSMUSG00000000957/ENSMUSG00000031207/ENSMUSG00000026072/ENSMUSG00000024810/ENSMUSG00000024659/ENSMUSG00000034855/ENSMUSG00000041120/ENSMUSG00000022892/ENSMUSG00000024397/ENSMUSG00000064210/ENSMUSG00000050335/ENSMUSG00000027009/ENSMUSG00000021994/ENSMUSG00000001123/ENSMUSG00000035776/ENSMUSG00000066551/ENSMUSG00000035385/…	Edn2/Plvap/Icam1/Csf1/Mmp14/Msn/Il1r1/Il33/Anxa1/Cxcl10/Nbl1/App/Aif1/Ano6/Lgals3/Itga4/Wnt5a/Lgals9/Cd99l2/Hmgb1/Ccl2/Nckap1l/Lyn/Ccl12/Myd88/Cx3cl1/Ccl28/P2ry12/Lrch1/Adora1/Abr/Kitl/Jam3/Slit2/Emilin1/Ripor2/Slc8b1	37
CC	GO:0005938	cell cortex	55|1463	297|16707	7.36156e-08	2.02443e-06	ENSMUSG00000022272/ENSMUSG00000007655/ENSMUSG00000019997/ENSMUSG00000049493/ENSMUSG00000031328/ENSMUSG00000048537/ENSMUSG00000046768/ENSMUSG00000001313/ENSMUSG00000018398/ENSMUSG00000034462/ENSMUSG00000006356/ENSMUSG00000027479/ENSMUSG00000022469/ENSMUSG00000002233/ENSMUSG00000059714/ENSMUSG00000024143/ENSMUSG00000011751/ENSMUSG00000060703/ENSMUSG00000028207/ENSMUSG00000061981/ENSMUSG00000052062/…	Myo10/Cav1/Ctgf/Pls1/Flna/Phldb1/Rhoj/Rnd2/Sept8/Pkd2/Crip2/Mapre1/Rapgef3/Rhoc/Flot1/Rhoq/Sptbn4/Cd302/Asph/Flot2/Pard3b/Gucy1b1/Rnd3/Rai14/Anxa2/Tpm3/Rasal3/Myadm/Sept3/Ezr/Gsn/Cltb/Cobl/Gnai1/Tnfaip2/Dmtn/Cdc42se1/Fnbp1/Mtss1l/Fgfr2/Sept9/Sept5/Cib2/Tpm4/Rhobtb3/Hmcn1/Plekhh2/Erc1/Cap2/Arc/Dbn1/Unc13c/Lasp1/Flnb/Ctsz	55
BP	GO:0010959	regulation of metal ion transport	65|1439	374|16518	5.03626e-08	2.12733e-06	ENSMUSG00000037405/ENSMUSG00000060802/ENSMUSG00000007655/ENSMUSG00000031328/ENSMUSG00000025351/ENSMUSG00000032562/ENSMUSG00000034855/ENSMUSG00000033161/ENSMUSG00000044080/ENSMUSG00000052920/ENSMUSG00000021057/ENSMUSG00000017400/ENSMUSG00000015968/ENSMUSG00000034462/ENSMUSG00000032554/ENSMUSG00000003161/ENSMUSG00000032412/ENSMUSG00000041936/ENSMUSG00000064210/ENSMUSG00000022469/ENSMUSG00000050335/…	Icam1/B2m/Cav1/Flna/Cd63/Gnai2/Cxcl10/Atp1a1/S100a1/Prkg1/Akap5/Stac2/Cacna1d/Pkd2/Trf/Sri/Atp1b3/Agrn/Ano6/Rapgef3/Lgals3/Sptbn4/Cacnb3/Asph/Fyn/Tgfb2/Plcb4/Ahnak/P2rx7/Kcnip1/Dmpk/Anxa2/Kcne1l/Cacna1b/Cyba/Plcg1/Kcna5/Fhl1/Cacna1a/Cacnb4/Lyn/Gem/Ccl12/Ptpn6/Ptpn3/Capn3/Cx3cl1/Amigo1/Cacna1g/Abcc8/P2ry12/Adora1/Rgs4/Bmp4/Tspo/Itpr1/Ptgs2/Camk2a/Pik3cg/Scn3b/Serpine2/Slc8b1/Selenon/Nos1ap/Pde4b	65
BP	GO:0043410	positive regulation of MAPK cascade	78|1439	481|16518	5.24433e-08	2.19818e-06	ENSMUSG00000037225/ENSMUSG00000015312/ENSMUSG00000026923/ENSMUSG00000005087/ENSMUSG00000064246/ENSMUSG00000037405/ENSMUSG00000031565/ENSMUSG00000019997/ENSMUSG00000024079/ENSMUSG00000003534/ENSMUSG00000034394/ENSMUSG00000002602/ENSMUSG00000062960/ENSMUSG00000026674/ENSMUSG00000017466/ENSMUSG00000029231/ENSMUSG00000024998/ENSMUSG00000032562/ENSMUSG00000024621/ENSMUSG00000030339/ENSMUSG00000022892/…	Fgf2/Gadd45b/Notch1/Cd44/Chil1/Icam1/Fgfr1/Ctgf/Eif2ak2/Ddr1/Lif/Axl/Kdr/Ddr2/Timp2/Pdgfra/Plce1/Gnai2/Csf1r/Ltbr/App/Necab2/Ghr/Egfr/Glipr2/Trf/Trem2/Gab1/Pdgfrb/Ptprc/Pde5a/Insrr/Wnt5a/Ntrk2/Tgfb2/Tlr4/Ror2/Hmgb1/Notch2/Mapk8ip1/Mertk/P2rx7/Wwc1/Ccl2/Sash1/Efna1/Arhgef5/Ptpn1/Thbs1/Cd24a/C3/Mdfic/Epha2/Erbb2/Ccl12/Nod1/Ajuba/Irak1/Myd88/Cx3cl1/Dab2ip/Adora1/Bmp4/Fgfr2/Gpr37/Kitl/Map3k8/Vangl2/M…	78
BP	GO:2000146	negative regulation of cell motility	50|1439	258|16518	5.55814e-08	2.31193e-06	ENSMUSG00000037225/ENSMUSG00000004040/ENSMUSG00000026923/ENSMUSG00000024087/ENSMUSG00000016918/ENSMUSG00000037736/ENSMUSG00000052336/ENSMUSG00000002985/ENSMUSG00000025351/ENSMUSG00000024810/ENSMUSG00000029838/ENSMUSG00000026185/ENSMUSG00000046718/ENSMUSG00000041120/ENSMUSG00000052920/ENSMUSG00000033170/ENSMUSG00000024397/ENSMUSG00000004665/ENSMUSG00000001131/ENSMUSG00000025314/ENSMUSG00000066551/…	Fgf2/Stat3/Notch1/Cyp1b1/Sulf1/Limch1/Cx3cr1/Apoe/Cd63/Il33/Ptn/Igfbp5/Bst2/Nbl1/Prkg1/Card10/Aif1/Cnn2/Timp1/Ptprj/Hmgb1/Trib1/Thbs1/Adamts9/Ccl12/Sfrp1/Pfn2/Cx3cl1/Abcc8/Dab2ip/Ccr5/Idh2/Eppk1/Ccl28/Tmeff2/Cygb/Lrch1/Adora1/Abr/Abhd2/Ptprk/Sp100/Arpin/Jup/Slit2/Emilin1/Adgrb1/Ripor2/2900011O08Rik/Rras	50
BP	GO:0070372	regulation of ERK1 and ERK2 cascade	56|1439	305|16518	6.35383e-08	2.62288e-06	ENSMUSG00000037225/ENSMUSG00000026923/ENSMUSG00000005087/ENSMUSG00000064246/ENSMUSG00000037405/ENSMUSG00000031565/ENSMUSG00000007655/ENSMUSG00000020044/ENSMUSG00000019997/ENSMUSG00000003534/ENSMUSG00000034394/ENSMUSG00000002602/ENSMUSG00000062960/ENSMUSG00000026674/ENSMUSG00000029231/ENSMUSG00000032562/ENSMUSG00000024621/ENSMUSG00000028195/ENSMUSG00000026628/ENSMUSG00000037211/ENSMUSG00000022892/…	Fgf2/Notch1/Cd44/Chil1/Icam1/Fgfr1/Cav1/Timp3/Ctgf/Ddr1/Lif/Axl/Kdr/Ddr2/Pdgfra/Gnai2/Csf1r/Cyr61/Atf3/Spry1/App/Necab2/Egfr/Glipr2/Trem2/Pdgfrb/Ptprc/Insrr/Ntrk2/Tlr4/Ror2/Clcf1/Hmgb1/Notch2/Mertk/Ccl2/Ptpn1/Dusp6/C3/Ezr/Lyn/Epha2/Erbb2/Ccl12/Nod1/Sema6a/Ptpn6/Cx3cl1/Fn1/Dab2ip/Bmp4/Gcnt2/Ccl9/Emilin1/Tirap/Rras	56
BP	GO:0043087	regulation of GTPase activity	68|1439	401|16518	6.65727e-08	2.72748e-06	ENSMUSG00000036995/ENSMUSG00000037405/ENSMUSG00000022508/ENSMUSG00000030123/ENSMUSG00000070509/ENSMUSG00000026678/ENSMUSG00000037999/ENSMUSG00000038235/ENSMUSG00000052920/ENSMUSG00000037211/ENSMUSG00000026640/ENSMUSG00000058325/ENSMUSG00000021676/ENSMUSG00000057729/ENSMUSG00000041936/ENSMUSG00000022469/ENSMUSG00000029101/ENSMUSG00000041959/ENSMUSG00000004633/ENSMUSG00000028919/ENSMUSG00000028556/…	Asap3/Icam1/Bcl6/Plxnd1/Rgma/Rgs5/Arap2/F11r/Prkg1/Spry1/Plxna2/Dock1/Iqgap2/Prtn3/Agrn/Rapgef3/Rgs12/S100a10/Chn2/Arhgef19/Dock7/Arhgap42/Wnt5a/Ntrk2/Rin2/Ccl2/Arhgef10/Rgs6/Arhgef5/Nckap1l/Rasal3/Rasa4/Plxna1/Rasa2/Epha2/Erbb2/Ccl12/Ajuba/Adap1/Ptprn2/Cx3cl1/Chn1/Plxnb2/Itgb1/Dab2ip/Asap2/Arfgap3/Lrch1/Rgs4/Dock2/Arhgap6/Mtss1l/Abr/Net1/Sh3bp4/Plekhg6/Arhgap23/Cav2/Ccl9/Vav1/Slit2/Arap3/Itga6/A…	68
BP	GO:0060070	canonical Wnt signaling pathway	49|1439	252|16518	6.7593e-08	2.74861e-06	ENSMUSG00000037225/ENSMUSG00000026923/ENSMUSG00000030309/ENSMUSG00000007655/ENSMUSG00000020393/ENSMUSG00000002985/ENSMUSG00000028517/ENSMUSG00000027803/ENSMUSG00000028163/ENSMUSG00000041075/ENSMUSG00000044674/ENSMUSG00000006800/ENSMUSG00000032280/ENSMUSG00000020122/ENSMUSG00000000567/ENSMUSG00000001827/ENSMUSG00000020140/ENSMUSG00000040183/ENSMUSG00000023972/ENSMUSG00000021994/ENSMUSG00000028926/…	Fgf2/Notch1/Caprin2/Cav1/Kremen1/Apoe/Plpp3/Wwtr1/Nfkb1/Fzd7/Fzd1/Sulf2/Tle3/Egfr/Sox9/Folr1/Lgr5/Ankrd6/Ptk7/Wnt5a/Cdk14/Ror2/Gprc5b/Frzb/Isl1/Thra/Smad3/Dkk3/Wls/Dact3/Yap1/Tle2/Sfrp1/Shisa6/Bcl9l/Dab2ip/Limd1/Tcf7l1/Tle1/Nrarp/Tcf7/Cdh3/Dact1/Csnk1e/Trpm4/Fzd6/Sox2/Ndp/Lrp5	49
BP	GO:0042116	macrophage activation	21|1439	65|16518	6.86961e-08	2.77278e-06	ENSMUSG00000028635/ENSMUSG00000022037/ENSMUSG00000052336/ENSMUSG00000024810/ENSMUSG00000034957/ENSMUSG00000031596/ENSMUSG00000022892/ENSMUSG00000030579/ENSMUSG00000024397/ENSMUSG00000025888/ENSMUSG00000035673/ENSMUSG00000027995/ENSMUSG00000026177/ENSMUSG00000021994/ENSMUSG00000001123/ENSMUSG00000039005/ENSMUSG00000066551/ENSMUSG00000040152/ENSMUSG00000059866/ENSMUSG00000015599/ENSMUSG00000031778	Edn2/Clu/Cx3cr1/Il33/Cebpa/Slc7a2/App/Tyrobp/Aif1/Casp1/Sbno2/Tlr2/Slc11a1/Wnt5a/Lgals9/Tlr4/Hmgb1/Thbs1/Tnip2/Ttbk1/Cx3cl1	21
BP	GO:0061138	morphogenesis of a branching epithelium	39|1439	180|16518	7.63645e-08	3.05963e-06	ENSMUSG00000037225/ENSMUSG00000026923/ENSMUSG00000053113/ENSMUSG00000031502/ENSMUSG00000031565/ENSMUSG00000016918/ENSMUSG00000003534/ENSMUSG00000030123/ENSMUSG00000014599/ENSMUSG00000037820/ENSMUSG00000000957/ENSMUSG00000029231/ENSMUSG00000032359/ENSMUSG00000025921/ENSMUSG00000015647/ENSMUSG00000037211/ENSMUSG00000034462/ENSMUSG00000000567/ENSMUSG00000001761/ENSMUSG00000051159/ENSMUSG00000063531/…	Fgf2/Notch1/Socs3/Col4a1/Fgfr1/Sulf1/Ddr1/Plxnd1/Csf1/Tgm2/Mmp14/Pdgfra/Ctsh/Rdh10/Lama5/Spry1/Pkd2/Sox9/Smo/Cited1/Sema3e/Wnt5a/Acvr1/Tgfbr2/Plxna1/Yap1/Epha2/Sfrp1/Bmp4/Fat4/Vangl2/Nrarp/St14/Lama1/Slit2/Timeless/Nfatc4/Lrp5/Ctsz	39
BP	GO:0010631	epithelial cell migration	50|1439	261|16518	8.13969e-08	3.23746e-06	ENSMUSG00000037225/ENSMUSG00000026923/ENSMUSG00000031565/ENSMUSG00000024087/ENSMUSG00000021701/ENSMUSG00000030123/ENSMUSG00000002985/ENSMUSG00000001507/ENSMUSG00000025351/ENSMUSG00000062960/ENSMUSG00000046768/ENSMUSG00000018593/ENSMUSG00000032359/ENSMUSG00000024659/ENSMUSG00000031841/ENSMUSG00000031486/ENSMUSG00000058325/ENSMUSG00000028480/ENSMUSG00000033170/ENSMUSG00000032194/ENSMUSG00000022475/…	Fgf2/Notch1/Fgfr1/Cyp1b1/Plk2/Plxnd1/Apoe/Itga3/Cd63/Kdr/Rhoj/Sparc/Ctsh/Anxa1/Cdh13/Adgra2/Dock1/Glipr2/Card10/Kank2/Hdac7/Sox9/Itgav/Itgb2/Wnt5a/Tgfb2/Hmgb1/Tgfbr2/Rock2/Sash1/Efna1/Thbs1/Plcg1/Adamts9/Enpp2/Epha2/Pfn2/Itgb1/Dab2ip/Bmp4/Ptgs2/Efnb2/Sp100/Jup/Slit2/Adgrb1/Stat5a/Zeb2/Hmox1/Amotl1	50
BP	GO:0002250	adaptive immune response	60|1439	339|16518	8.47852e-08	3.34779e-06	ENSMUSG00000073418/ENSMUSG00000004040/ENSMUSG00000023224/ENSMUSG00000053175/ENSMUSG00000035929/ENSMUSG00000061232/ENSMUSG00000037405/ENSMUSG00000060802/ENSMUSG00000038642/ENSMUSG00000073411/ENSMUSG00000036905/ENSMUSG00000022508/ENSMUSG00000058952/ENSMUSG00000020641/ENSMUSG00000036887/ENSMUSG00000030560/ENSMUSG00000036896/ENSMUSG00000026072/ENSMUSG00000026415/ENSMUSG00000023915/ENSMUSG00000067212/…	C4b/Stat3/Serping1/Bcl3/H2-Q4/H2-K1/Icam1/B2m/Ctss/H2-D1/C1qb/Bcl6/Cfi/Rsad2/C1qa/Ctsc/C1qc/Il1r1/Fcamr/Tnfrsf21/H2-T23/Il33/Ctsh/Anxa1/Irf1/C1ra/Nfkb2/Ptprc/Tap1/Slc11a1/Fas/Stat6/Fyn/H2-M3/H2-Q6/Pvr/Clcf1/Hmgb1/P2rx7/Prkcb/Cd274/Adgre1/Cd24a/C3/H2-Ab1/Lyn/H2-Q7/Ptpn6/Myd88/Ighm/Jam3/Fcer1g/H2-T22/Vsir/Pag1/Fam49b/Arid5a/Prkcq/Trpm4/Cd86	60
BP	GO:0048659	smooth muscle cell proliferation	36|1439	160|16518	8.80526e-08	3.45179e-06	ENSMUSG00000037225/ENSMUSG00000022893/ENSMUSG00000007655/ENSMUSG00000016918/ENSMUSG00000037820/ENSMUSG00000026678/ENSMUSG00000019982/ENSMUSG00000026185/ENSMUSG00000032562/ENSMUSG00000052920/ENSMUSG00000031841/ENSMUSG00000020122/ENSMUSG00000024397/ENSMUSG00000021555/ENSMUSG00000024620/ENSMUSG00000032440/ENSMUSG00000000001/ENSMUSG00000032501/ENSMUSG00000040152/ENSMUSG00000006519/ENSMUSG00000059883/…	Fgf2/Adamts1/Cav1/Sulf1/Tgm2/Rgs5/Myb/Igfbp5/Gnai2/Prkg1/Cdh13/Egfr/Aif1/Naa35/Pdgfrb/Tgfbr2/Gnai3/Trib1/Thbs1/Cyba/Irak4/Rbpms2/Notch3/Abcc4/Irak1/Myd88/Cx3cl1/Stat5b/Comt/Bmp4/Fgfr2/Map3k5/Ptgs2/Cdkn1a/Ang/Hmox1	36
BP	GO:0002460	adaptive immune response based on somatic recombination of immune receptors built from immunoglobulin superfamily domains	48|1439	247|16518	9.35123e-08	3.63963e-06	ENSMUSG00000073418/ENSMUSG00000004040/ENSMUSG00000023224/ENSMUSG00000053175/ENSMUSG00000035929/ENSMUSG00000061232/ENSMUSG00000037405/ENSMUSG00000060802/ENSMUSG00000073411/ENSMUSG00000036905/ENSMUSG00000022508/ENSMUSG00000058952/ENSMUSG00000020641/ENSMUSG00000036887/ENSMUSG00000030560/ENSMUSG00000036896/ENSMUSG00000026072/ENSMUSG00000067212/ENSMUSG00000024810/ENSMUSG00000032359/ENSMUSG00000024659/…	C4b/Stat3/Serping1/Bcl3/H2-Q4/H2-K1/Icam1/B2m/H2-D1/C1qb/Bcl6/Cfi/Rsad2/C1qa/Ctsc/C1qc/Il1r1/H2-T23/Il33/Ctsh/Anxa1/Irf1/C1ra/Nfkb2/Ptprc/Slc11a1/Fas/Stat6/H2-M3/H2-Q6/Pvr/Clcf1/Hmgb1/P2rx7/Cd274/Cd24a/C3/H2-Ab1/H2-Q7/Ptpn6/Myd88/Fcer1g/H2-T22/Vsir/Fam49b/Arid5a/Prkcq/Trpm4	48
BP	GO:0010543	regulation of platelet activation	13|1439	27|16518	9.88608e-08	3.82052e-06	ENSMUSG00000028583/ENSMUSG00000002985/ENSMUSG00000029231/ENSMUSG00000030342/ENSMUSG00000052920/ENSMUSG00000039005/ENSMUSG00000020120/ENSMUSG00000042228/ENSMUSG00000057880/ENSMUSG00000022099/ENSMUSG00000058715/ENSMUSG00000026778/ENSMUSG00000026249	Pdpn/Apoe/Pdgfra/Cd9/Prkg1/Tlr4/Plek/Lyn/Abat/Dmtn/Fcer1g/Prkcq/Serpine2	13
BP	GO:0048732	gland development	71|1439	430|16518	1.01578e-07	3.89787e-06	ENSMUSG00000037225/ENSMUSG00000026923/ENSMUSG00000031565/ENSMUSG00000007655/ENSMUSG00000016918/ENSMUSG00000003534/ENSMUSG00000030123/ENSMUSG00000014599/ENSMUSG00000023031/ENSMUSG00000037820/ENSMUSG00000031207/ENSMUSG00000029231/ENSMUSG00000006435/ENSMUSG00000038776/ENSMUSG00000019982/ENSMUSG00000027168/ENSMUSG00000034957/ENSMUSG00000024659/ENSMUSG00000029838/ENSMUSG00000026185/ENSMUSG00000030737/…	Fgf2/Notch1/Fgfr1/Cav1/Sulf1/Ddr1/Plxnd1/Csf1/Cela1/Tgm2/Msn/Pdgfra/Neurl1a/Ephx1/Myb/Pax6/Cebpa/Anxa1/Ptn/Igfbp5/Slco2b1/Sulf2/Lama5/Egfr/Pkd2/Sox9/Ucp2/Six3/Smo/Ass1/Wnt5a/Stat6/Tgfb2/Nfib/Tgfbr2/Frzb/Isl1/Lsr/Thra/Cebpb/Plxna1/Smad3/Asns/Oas2/Wls/Cacnb4/Epha2/Igsf3/Sfrp1/Ptpn3/Mdk/Stat5b/Cobl/Bmp4/Socs2/Tspo/Mpst/Onecut2/Id4/Rps6ka1/Lama1/Irf6/Nat1/Npm1/Slit2/Stat5a/Serpine2/Hmox1/Arid5b/Sox2/…	71
BP	GO:0007219	Notch signaling pathway	36|1439	161|16518	1.04057e-07	3.9651e-06	ENSMUSG00000004040/ENSMUSG00000067586/ENSMUSG00000026923/ENSMUSG00000022508/ENSMUSG00000000957/ENSMUSG00000006435/ENSMUSG00000050271/ENSMUSG00000034957/ENSMUSG00000002799/ENSMUSG00000019789/ENSMUSG00000021756/ENSMUSG00000022892/ENSMUSG00000030103/ENSMUSG00000000567/ENSMUSG00000014773/ENSMUSG00000049502/ENSMUSG00000030098/ENSMUSG00000039239/ENSMUSG00000042182/ENSMUSG00000040274/ENSMUSG00000027878/…	Stat3/S1pr3/Notch1/Bcl6/Mmp14/Neurl1a/Prag1/Cebpa/Jag2/Hey2/Il6st/App/Bhlhe40/Sox9/Dll1/Dtx3l/Grip2/Tgfb2/Bend6/Cdk6/Notch2/Sorbs2/Tgfbr2/Lfng/Neurod4/Kcna5/Maml2/Notch3/Dtx4/Fat4/Zmiz1/Nrarp/Anxa4/Tspan14/Perp/Maml3	36
BP	GO:0002443	leukocyte mediated immunity	55|1439	302|16518	1.1025e-07	4.169e-06	ENSMUSG00000073418/ENSMUSG00000023224/ENSMUSG00000053175/ENSMUSG00000035929/ENSMUSG00000061232/ENSMUSG00000037405/ENSMUSG00000060802/ENSMUSG00000073411/ENSMUSG00000036905/ENSMUSG00000022508/ENSMUSG00000058952/ENSMUSG00000020641/ENSMUSG00000036887/ENSMUSG00000030560/ENSMUSG00000036896/ENSMUSG00000026072/ENSMUSG00000040296/ENSMUSG00000067212/ENSMUSG00000032359/ENSMUSG00000046718/ENSMUSG00000055172/…	C4b/Serping1/Bcl3/H2-Q4/H2-K1/Icam1/B2m/H2-D1/C1qb/Bcl6/Cfi/Rsad2/C1qa/Ctsc/C1qc/Il1r1/Ddx58/H2-T23/Ctsh/Bst2/C1ra/Ptprc/Il21/Tap1/Slc11a1/Fas/Lag3/Stat6/Lgals9/H2-M3/H2-Q6/Tlr4/Pvr/Clcf1/Hmgb1/P2rx7/Cd24a/Irak4/C3/H2-Ab1/Lyn/H2-Q7/Ptpn6/Myd88/Stat5b/Abr/Fcer1g/H2-T22/Vsir/Vav1/Fam49b/Stat5a/Arid5a/Hmox1/Trpm4	55
BP	GO:0019882	antigen processing and presentation	23|1439	78|16518	1.11276e-07	4.169e-06	ENSMUSG00000035929/ENSMUSG00000061232/ENSMUSG00000037405/ENSMUSG00000060802/ENSMUSG00000038642/ENSMUSG00000073411/ENSMUSG00000024338/ENSMUSG00000067212/ENSMUSG00000023992/ENSMUSG00000037321/ENSMUSG00000026177/ENSMUSG00000016206/ENSMUSG00000073409/ENSMUSG00000040152/ENSMUSG00000022216/ENSMUSG00000026471/ENSMUSG00000073421/ENSMUSG00000060550/ENSMUSG00000038058/ENSMUSG00000058715/ENSMUSG00000056116/…	H2-Q4/H2-K1/Icam1/B2m/Ctss/H2-D1/Psmb8/H2-T23/Trem2/Tap1/Slc11a1/H2-M3/H2-Q6/Thbs1/Psme1/Mr1/H2-Ab1/H2-Q7/Nod1/Fcer1g/H2-T22/Rab35/Rab8b	23
BP	GO:0002218	activation of innate immune response	33|1439	141|16518	1.1212e-07	4.169e-06	ENSMUSG00000037921/ENSMUSG00000020227/ENSMUSG00000030921/ENSMUSG00000007655/ENSMUSG00000020641/ENSMUSG00000069874/ENSMUSG00000057143/ENSMUSG00000040296/ENSMUSG00000026896/ENSMUSG00000029826/ENSMUSG00000018899/ENSMUSG00000027995/ENSMUSG00000059714/ENSMUSG00000036908/ENSMUSG00000001123/ENSMUSG00000039005/ENSMUSG00000043496/ENSMUSG00000066551/ENSMUSG00000052688/ENSMUSG00000006519/ENSMUSG00000059866/…	Ddx60/Irak3/Trim30a/Cav1/Rsad2/Irgm2/Trim12c/Ddx58/Ifih1/Zc3hav1/Irf1/Tlr2/Flot1/Unc93b1/Lgals9/Tlr4/Tril/Hmgb1/Rab7b/Cyba/Tnip2/Lyn/Pik3ap1/Irak1/Myd88/Irak2/Dab2ip/Tmem173/Mapkapk3/Dhx58/Tirap/Trim5/Cd86	33
BP	GO:0050678	regulation of epithelial cell proliferation	56|1439	310|16518	1.12469e-07	4.169e-06	ENSMUSG00000037225/ENSMUSG00000004040/ENSMUSG00000026923/ENSMUSG00000031565/ENSMUSG00000007655/ENSMUSG00000016918/ENSMUSG00000002985/ENSMUSG00000062960/ENSMUSG00000026204/ENSMUSG00000018593/ENSMUSG00000044786/ENSMUSG00000027168/ENSMUSG00000029838/ENSMUSG00000041075/ENSMUSG00000026104/ENSMUSG00000006800/ENSMUSG00000031841/ENSMUSG00000020122/ENSMUSG00000000567/ENSMUSG00000001761/ENSMUSG00000052957/…	Fgf2/Stat3/Notch1/Fgfr1/Cav1/Sulf1/Apoe/Kdr/Ptprn/Sparc/Zfp36/Pax6/Ptn/Fzd7/Stat1/Sulf2/Cdh13/Egfr/Sox9/Smo/Gas1/Ccnd2/Itga4/Wnt5a/Tgfb2/Nfib/Cdk6/Hmgb1/Isl1/Ccl2/Thbs1/Cyba/Smad3/Plcg1/Zfp36l1/Yap1/Erbb2/Ccl12/Sfrp1/Ift57/Dab2ip/Eppk1/Bmp4/Fgfr2/Wdr13/Nrarp/Cav2/Efnb2/Ptprk/Npm1/Cdh3/Stat5a/Ang/Ctsl/Hmox1/Sox2	56
CC	GO:0043230	extracellular organelle	25|1463	91|16707	1.62011e-07	4.26158e-06	ENSMUSG00000028270/ENSMUSG00000037405/ENSMUSG00000040253/ENSMUSG00000029298/ENSMUSG00000028268/ENSMUSG00000055447/ENSMUSG00000069874/ENSMUSG00000025351/ENSMUSG00000104713/ENSMUSG00000030342/ENSMUSG00000024659/ENSMUSG00000007041/ENSMUSG00000003161/ENSMUSG00000028249/ENSMUSG00000027009/ENSMUSG00000069833/ENSMUSG00000008734/ENSMUSG00000016496/ENSMUSG00000032231/ENSMUSG00000026193/ENSMUSG00000030340/…	Gbp2/Icam1/Gbp7/Gbp9/Gbp3/Cd47/Irgm2/Cd63/Gbp6/Cd9/Anxa1/Clic1/Sri/Sdcbp/Itga4/Ahnak/Gprc5b/Cd274/Anxa2/Fn1/Scnn1a/Lamp2/Arc/Qsox1/Cd86	25
BP	GO:0090132	epithelium migration	50|1439	264|16518	1.18239e-07	4.35328e-06	ENSMUSG00000037225/ENSMUSG00000026923/ENSMUSG00000031565/ENSMUSG00000024087/ENSMUSG00000021701/ENSMUSG00000030123/ENSMUSG00000002985/ENSMUSG00000001507/ENSMUSG00000025351/ENSMUSG00000062960/ENSMUSG00000046768/ENSMUSG00000018593/ENSMUSG00000032359/ENSMUSG00000024659/ENSMUSG00000031841/ENSMUSG00000031486/ENSMUSG00000058325/ENSMUSG00000028480/ENSMUSG00000033170/ENSMUSG00000032194/ENSMUSG00000022475/…	Fgf2/Notch1/Fgfr1/Cyp1b1/Plk2/Plxnd1/Apoe/Itga3/Cd63/Kdr/Rhoj/Sparc/Ctsh/Anxa1/Cdh13/Adgra2/Dock1/Glipr2/Card10/Kank2/Hdac7/Sox9/Itgav/Itgb2/Wnt5a/Tgfb2/Hmgb1/Tgfbr2/Rock2/Sash1/Efna1/Thbs1/Plcg1/Adamts9/Enpp2/Epha2/Pfn2/Itgb1/Dab2ip/Bmp4/Ptgs2/Efnb2/Sp100/Jup/Slit2/Adgrb1/Stat5a/Zeb2/Hmox1/Amotl1	50
BP	GO:0030193	regulation of blood coagulation	21|1439	67|16518	1.23817e-07	4.49784e-06	ENSMUSG00000023224/ENSMUSG00000028583/ENSMUSG00000007655/ENSMUSG00000022912/ENSMUSG00000002985/ENSMUSG00000029231/ENSMUSG00000030342/ENSMUSG00000052920/ENSMUSG00000027712/ENSMUSG00000064210/ENSMUSG00000039005/ENSMUSG00000020120/ENSMUSG00000032231/ENSMUSG00000040152/ENSMUSG00000042228/ENSMUSG00000057880/ENSMUSG00000022099/ENSMUSG00000016494/ENSMUSG00000058715/ENSMUSG00000026778/ENSMUSG00000026249	Serping1/Pdpn/Cav1/Pros1/Apoe/Pdgfra/Cd9/Prkg1/Anxa5/Ano6/Tlr4/Plek/Anxa2/Thbs1/Lyn/Abat/Dmtn/Cd34/Fcer1g/Prkcq/Serpine2	21
BP	GO:1900046	regulation of hemostasis	21|1439	67|16518	1.23817e-07	4.49784e-06	ENSMUSG00000023224/ENSMUSG00000028583/ENSMUSG00000007655/ENSMUSG00000022912/ENSMUSG00000002985/ENSMUSG00000029231/ENSMUSG00000030342/ENSMUSG00000052920/ENSMUSG00000027712/ENSMUSG00000064210/ENSMUSG00000039005/ENSMUSG00000020120/ENSMUSG00000032231/ENSMUSG00000040152/ENSMUSG00000042228/ENSMUSG00000057880/ENSMUSG00000022099/ENSMUSG00000016494/ENSMUSG00000058715/ENSMUSG00000026778/ENSMUSG00000026249	Serping1/Pdpn/Cav1/Pros1/Apoe/Pdgfra/Cd9/Prkg1/Anxa5/Ano6/Tlr4/Plek/Anxa2/Thbs1/Lyn/Abat/Dmtn/Cd34/Fcer1g/Prkcq/Serpine2	21
BP	GO:0030856	regulation of epithelial cell differentiation	30|1439	122|16518	1.31345e-07	4.73975e-06	ENSMUSG00000067586/ENSMUSG00000026923/ENSMUSG00000030341/ENSMUSG00000007655/ENSMUSG00000034394/ENSMUSG00000027803/ENSMUSG00000044786/ENSMUSG00000027168/ENSMUSG00000019789/ENSMUSG00000000567/ENSMUSG00000014773/ENSMUSG00000001761/ENSMUSG00000051159/ENSMUSG00000039239/ENSMUSG00000027004/ENSMUSG00000020580/ENSMUSG00000056501/ENSMUSG00000047139/ENSMUSG00000023991/ENSMUSG00000042622/ENSMUSG00000021127/…	S1pr3/Notch1/Tnfrsf1a/Cav1/Lif/Wwtr1/Zfp36/Pax6/Hey2/Sox9/Dll1/Smo/Cited1/Tgfb2/Frzb/Rock2/Cebpb/Cd24a/Foxp4/Maff/Zfp36l1/Yap1/Cul7/Stat5b/Bmp4/Prkch/Fat4/Ajap1/Stat5a/Zeb2	30
CC	GO:0005924	cell-substrate adherens junction	36|1463	164|16707	1.93409e-07	4.87551e-06	ENSMUSG00000036995/ENSMUSG00000007655/ENSMUSG00000025321/ENSMUSG00000031207/ENSMUSG00000050271/ENSMUSG00000027479/ENSMUSG00000027087/ENSMUSG00000026395/ENSMUSG00000037003/ENSMUSG00000026074/ENSMUSG00000028249/ENSMUSG00000058056/ENSMUSG00000023348/ENSMUSG00000021998/ENSMUSG00000031626/ENSMUSG00000029860/ENSMUSG00000006519/ENSMUSG00000033306/ENSMUSG00000051379/ENSMUSG00000001864/ENSMUSG00000052397/…	Asap3/Cav1/Itgb8/Msn/Prag1/Mapre1/Itgav/Ptprc/Tns2/Map4k4/Sdcbp/Palld/Trip6/Lcp1/Sorbs2/Zyx/Cyba/Lpp/Flrt3/Aif1l/Ezr/Gsn/Tle2/Epha2/Ajuba/Itgb1/Klf11/Limd1/Cib2/Cav2/Fblim1/Adgrb1/Hck/Rsu1/Lasp1/Flnb	36
BP	GO:0030168	platelet activation	22|1439	73|16518	1.36404e-07	4.88989e-06	ENSMUSG00000028583/ENSMUSG00000002985/ENSMUSG00000002602/ENSMUSG00000029231/ENSMUSG00000030342/ENSMUSG00000052920/ENSMUSG00000039005/ENSMUSG00000020120/ENSMUSG00000014361/ENSMUSG00000042228/ENSMUSG00000004266/ENSMUSG00000057880/ENSMUSG00000031778/ENSMUSG00000001930/ENSMUSG00000022099/ENSMUSG00000048120/ENSMUSG00000036353/ENSMUSG00000058715/ENSMUSG00000020573/ENSMUSG00000026778/ENSMUSG00000026249/…	Pdpn/Apoe/Axl/Pdgfra/Cd9/Prkg1/Tlr4/Plek/Mertk/Lyn/Ptpn6/Abat/Cx3cl1/Vwf/Dmtn/Entpd1/P2ry12/Fcer1g/Pik3cg/Prkcq/Serpine2/Fzd6	22
BP	GO:0048660	regulation of smooth muscle cell proliferation	35|1439	156|16518	1.42733e-07	5.08335e-06	ENSMUSG00000037225/ENSMUSG00000022893/ENSMUSG00000007655/ENSMUSG00000016918/ENSMUSG00000037820/ENSMUSG00000026678/ENSMUSG00000019982/ENSMUSG00000026185/ENSMUSG00000032562/ENSMUSG00000052920/ENSMUSG00000031841/ENSMUSG00000020122/ENSMUSG00000024397/ENSMUSG00000024620/ENSMUSG00000032440/ENSMUSG00000000001/ENSMUSG00000032501/ENSMUSG00000040152/ENSMUSG00000006519/ENSMUSG00000059883/ENSMUSG00000032387/…	Fgf2/Adamts1/Cav1/Sulf1/Tgm2/Rgs5/Myb/Igfbp5/Gnai2/Prkg1/Cdh13/Egfr/Aif1/Pdgfrb/Tgfbr2/Gnai3/Trib1/Thbs1/Cyba/Irak4/Rbpms2/Notch3/Abcc4/Irak1/Myd88/Cx3cl1/Stat5b/Comt/Bmp4/Fgfr2/Map3k5/Ptgs2/Cdkn1a/Ang/Hmox1	35
BP	GO:0007596	blood coagulation	33|1439	143|16518	1.59898e-07	5.6577e-06	ENSMUSG00000023224/ENSMUSG00000028583/ENSMUSG00000007655/ENSMUSG00000022912/ENSMUSG00000002985/ENSMUSG00000002602/ENSMUSG00000029231/ENSMUSG00000030342/ENSMUSG00000052920/ENSMUSG00000027712/ENSMUSG00000064210/ENSMUSG00000028128/ENSMUSG00000039005/ENSMUSG00000056724/ENSMUSG00000020120/ENSMUSG00000014361/ENSMUSG00000032231/ENSMUSG00000040152/ENSMUSG00000024164/ENSMUSG00000042228/ENSMUSG00000004266/…	Serping1/Pdpn/Cav1/Pros1/Apoe/Axl/Pdgfra/Cd9/Prkg1/Anxa5/Ano6/F3/Tlr4/Nbeal2/Plek/Mertk/Anxa2/Thbs1/C3/Lyn/Ptpn6/Abat/Cx3cl1/Vwf/Dmtn/Entpd1/P2ry12/Cd34/Fcer1g/Pik3cg/Prkcq/Serpine2/Fzd6	33
CC	GO:0014069	postsynaptic density	60|1463	347|16707	2.3641e-07	5.72113e-06	ENSMUSG00000004040/ENSMUSG00000053931/ENSMUSG00000043079/ENSMUSG00000026072/ENSMUSG00000006435/ENSMUSG00000033161/ENSMUSG00000021057/ENSMUSG00000032060/ENSMUSG00000025892/ENSMUSG00000040479/ENSMUSG00000056073/ENSMUSG00000001761/ENSMUSG00000013033/ENSMUSG00000030098/ENSMUSG00000021585/ENSMUSG00000047181/ENSMUSG00000019843/ENSMUSG00000055254/ENSMUSG00000039943/ENSMUSG00000068748/ENSMUSG00000031626/…	Stat3/Cnn3/Synpo/Il1r1/Neurl1a/Atp1a1/Akap5/Cryab/Gria4/Dgkz/Grik2/Smo/Adgrl1/Grip2/Cast/Samd14/Fyn/Ntrk2/Plcb4/Ptprz1/Sorbs2/Palm/Shisa7/Gria1/Srcin1/Ctnna2/Lrp8/Insyn1/Mpp2/Flrt3/Gria3/Lin7b/Slc6a9/Lyn/Ptprf/Dlgap3/Shisa6/Myd88/Camk2b/Dmtn/Entpd1/Adora1/Camk1/Abr/Gap43/Rapgef4/Itpr1/Camk2a/Lrfn4/Shisa8/Erc1/Cap2/Arc/Dbn1/Adgrb1/Camk2g/Dab1/Syt11/Snap47/Pde4b	60
BP	GO:0050870	positive regulation of T cell activation	35|1439	157|16518	1.68541e-07	5.92502e-06	ENSMUSG00000007655/ENSMUSG00000022508/ENSMUSG00000027962/ENSMUSG00000055447/ENSMUSG00000067212/ENSMUSG00000019982/ENSMUSG00000024659/ENSMUSG00000018899/ENSMUSG00000021756/ENSMUSG00000024397/ENSMUSG00000026395/ENSMUSG00000027718/ENSMUSG00000001123/ENSMUSG00000061981/ENSMUSG00000016206/ENSMUSG00000066551/ENSMUSG00000032440/ENSMUSG00000035385/ENSMUSG00000016496/ENSMUSG00000022488/ENSMUSG00000052142/…	Cav1/Bcl6/Vcam1/Cd47/H2-T23/Myb/Anxa1/Irf1/Il6st/Aif1/Ptprc/Il21/Lgals9/Flot2/H2-M3/Hmgb1/Tgfbr2/Ccl2/Cd274/Nckap1l/Rasal3/Cd24a/H2-Ab1/Ccdc88b/Lgals1/Cd276/Stat5b/Efnb1/Zmiz1/Vsir/Efnb2/Fam49b/Stat5a/Prkcq/Cd86	35
CC	GO:0099572	postsynaptic specialization	63|1463	372|16707	2.55562e-07	5.94673e-06	ENSMUSG00000004040/ENSMUSG00000053931/ENSMUSG00000043079/ENSMUSG00000026072/ENSMUSG00000006435/ENSMUSG00000033161/ENSMUSG00000021057/ENSMUSG00000032060/ENSMUSG00000025892/ENSMUSG00000040479/ENSMUSG00000056073/ENSMUSG00000001761/ENSMUSG00000013033/ENSMUSG00000030098/ENSMUSG00000021585/ENSMUSG00000047181/ENSMUSG00000019843/ENSMUSG00000055254/ENSMUSG00000039943/ENSMUSG00000068748/ENSMUSG00000031626/…	Stat3/Cnn3/Synpo/Il1r1/Neurl1a/Atp1a1/Akap5/Cryab/Gria4/Dgkz/Grik2/Smo/Adgrl1/Grip2/Cast/Samd14/Fyn/Ntrk2/Plcb4/Ptprz1/Sorbs2/Palm/Shisa7/Gria1/Srcin1/Ctnna2/Lrp8/Insyn1/Mpp2/Flrt3/Gria3/Lin7b/Slc6a9/Lyn/Ptprf/Dlgap3/Shisa6/Myd88/Camk2b/Dmtn/Entpd1/Adora1/Camk1/Abr/Gap43/Rapgef4/Gabra1/Gabrg2/Itpr1/Camk2a/Lrfn4/Shisa8/Erc1/Cap2/Arc/Dbn1/Adgrb1/Camk2g/Dab1/Syt11/Snap47/Gabrb3/Pde4b	63
BP	GO:0071216	cellular response to biotic stimulus	42|1439	207|16518	1.71438e-07	5.98824e-06	ENSMUSG00000028270/ENSMUSG00000026728/ENSMUSG00000032372/ENSMUSG00000028599/ENSMUSG00000052336/ENSMUSG00000069874/ENSMUSG00000002602/ENSMUSG00000020638/ENSMUSG00000104713/ENSMUSG00000044786/ENSMUSG00000028163/ENSMUSG00000034855/ENSMUSG00000021423/ENSMUSG00000015243/ENSMUSG00000023992/ENSMUSG00000025888/ENSMUSG00000076441/ENSMUSG00000035673/ENSMUSG00000027995/ENSMUSG00000041515/ENSMUSG00000021994/…	Gbp2/Vim/Plscr2/Tnfrsf1b/Cx3cr1/Irgm2/Axl/Cmpk2/Gbp6/Zfp36/Nfkb1/Cxcl10/Ly86/Abca1/Trem2/Casp1/Ass1/Sbno2/Tlr2/Irf8/Wnt5a/Tlr4/Cd180/Ccl2/Sash1/Trib1/Cd274/Cebpb/Tnip2/Lyn/Ccl12/Irak1/Myd88/Cx3cl1/Irak2/Dab2ip/Ccr5/Tspo/Arid5a/Litaf/Cd86/Pde4b	42
CC	GO:0031253	cell projection membrane	55|1463	309|16707	2.85732e-07	6.40251e-06	ENSMUSG00000005087/ENSMUSG00000028583/ENSMUSG00000022272/ENSMUSG00000030123/ENSMUSG00000001507/ENSMUSG00000031207/ENSMUSG00000040296/ENSMUSG00000021057/ENSMUSG00000015968/ENSMUSG00000035441/ENSMUSG00000034462/ENSMUSG00000027479/ENSMUSG00000024397/ENSMUSG00000001827/ENSMUSG00000022469/ENSMUSG00000027087/ENSMUSG00000001761/ENSMUSG00000021998/ENSMUSG00000068748/ENSMUSG00000020120/ENSMUSG00000029122/…	Cd44/Pdpn/Myo10/Plxnd1/Itga3/Msn/Ddx58/Akap5/Cacna1d/Myo1d/Pkd2/Mapre1/Aif1/Folr1/Rapgef3/Itgav/Smo/Lcp1/Ptprz1/Plek/Evc/Palm/Shisa7/Wwc1/Prkcb/Gria1/Lamp5/Mpp2/Cd24a/Aif1l/Ezr/Wls/Epha2/Cltb/Shisa6/Itgb1/Arl6/Plekha1/Dmtn/Adora1/Mtss1l/Sgce/Gpr157/Gap43/Gabra1/Scnn1a/Myo1c/Gabrg2/Pcdhb16/Kcnk1/Shisa8/Rab35/Pth1r/Ripor2/Antxr1	55
CC	GO:0097060	synaptic membrane	69|1463	423|16707	3.00543e-07	6.49264e-06	ENSMUSG00000055368/ENSMUSG00000035200/ENSMUSG00000020388/ENSMUSG00000032172/ENSMUSG00000001507/ENSMUSG00000022656/ENSMUSG00000043079/ENSMUSG00000006435/ENSMUSG00000024659/ENSMUSG00000017978/ENSMUSG00000001985/ENSMUSG00000021057/ENSMUSG00000032060/ENSMUSG00000025892/ENSMUSG00000031517/ENSMUSG00000056073/ENSMUSG00000026833/ENSMUSG00000013033/ENSMUSG00000030098/ENSMUSG00000025555/ENSMUSG00000017167/…	Slc6a2/Chrnb4/Pdlim4/Olfm2/Itga3/Nectin3/Synpo/Neurl1a/Anxa1/Cadps2/Grik3/Akap5/Cryab/Gria4/Gpm6a/Grik2/Olfm1/Adgrl1/Grip2/Farp1/Cntnap1/Flot2/Slc6a8/Ptprz1/Palm/Shisa7/Gria1/Slc2a3/Insyn1/Mpp2/Flrt3/Gria3/Lin7b/Sept3/Slc6a9/Grik1/Cacna1a/Ptprf/Dlgap3/Htr3a/Erbb2/Cltb/Shisa6/Efnb1/Itgb1/Comt/Entpd1/Adora1/Gabra1/Gpc4/Ache/Gabrg2/Scn1a/Itpr1/Pcdhb16/Camk2a/Efnb2/Lrfn4/Shisa8/Arc/Dbn1/Adgrb1/Unc13c…	69
CC	GO:0005925	focal adhesion	35|1463	160|16707	3.11217e-07	6.49264e-06	ENSMUSG00000036995/ENSMUSG00000007655/ENSMUSG00000025321/ENSMUSG00000031207/ENSMUSG00000050271/ENSMUSG00000027479/ENSMUSG00000027087/ENSMUSG00000026395/ENSMUSG00000037003/ENSMUSG00000026074/ENSMUSG00000028249/ENSMUSG00000058056/ENSMUSG00000023348/ENSMUSG00000021998/ENSMUSG00000031626/ENSMUSG00000029860/ENSMUSG00000006519/ENSMUSG00000033306/ENSMUSG00000051379/ENSMUSG00000001864/ENSMUSG00000052397/…	Asap3/Cav1/Itgb8/Msn/Prag1/Mapre1/Itgav/Ptprc/Tns2/Map4k4/Sdcbp/Palld/Trip6/Lcp1/Sorbs2/Zyx/Cyba/Lpp/Flrt3/Aif1l/Ezr/Gsn/Tle2/Epha2/Ajuba/Itgb1/Klf11/Limd1/Cav2/Fblim1/Adgrb1/Hck/Rsu1/Lasp1/Flnb	35
BP	GO:0010632	regulation of epithelial cell migration	42|1439	208|16518	1.97064e-07	6.83949e-06	ENSMUSG00000037225/ENSMUSG00000026923/ENSMUSG00000031565/ENSMUSG00000021701/ENSMUSG00000002985/ENSMUSG00000028517/ENSMUSG00000001507/ENSMUSG00000025351/ENSMUSG00000062960/ENSMUSG00000046768/ENSMUSG00000018593/ENSMUSG00000032359/ENSMUSG00000024659/ENSMUSG00000031486/ENSMUSG00000058325/ENSMUSG00000028480/ENSMUSG00000033170/ENSMUSG00000022475/ENSMUSG00000000567/ENSMUSG00000021994/ENSMUSG00000039239/…	Fgf2/Notch1/Fgfr1/Plk2/Apoe/Plpp3/Itga3/Cd63/Kdr/Rhoj/Sparc/Ctsh/Anxa1/Adgra2/Dock1/Glipr2/Card10/Hdac7/Sox9/Wnt5a/Tgfb2/Hmgb1/Tgfbr2/Rock2/Sash1/Efna1/Thbs1/Plcg1/Adamts9/Enpp2/Epha2/Pfn2/Dab2ip/Bmp4/Ptgs2/Sp100/Jup/Slit2/Adgrb1/Stat5a/Hmox1/Amotl1	42
CC	GO:0032279	asymmetric synapse	60|1463	351|16707	3.54615e-07	7.15139e-06	ENSMUSG00000004040/ENSMUSG00000053931/ENSMUSG00000043079/ENSMUSG00000026072/ENSMUSG00000006435/ENSMUSG00000033161/ENSMUSG00000021057/ENSMUSG00000032060/ENSMUSG00000025892/ENSMUSG00000040479/ENSMUSG00000056073/ENSMUSG00000001761/ENSMUSG00000013033/ENSMUSG00000030098/ENSMUSG00000021585/ENSMUSG00000047181/ENSMUSG00000019843/ENSMUSG00000055254/ENSMUSG00000039943/ENSMUSG00000068748/ENSMUSG00000031626/…	Stat3/Cnn3/Synpo/Il1r1/Neurl1a/Atp1a1/Akap5/Cryab/Gria4/Dgkz/Grik2/Smo/Adgrl1/Grip2/Cast/Samd14/Fyn/Ntrk2/Plcb4/Ptprz1/Sorbs2/Palm/Shisa7/Gria1/Srcin1/Ctnna2/Lrp8/Insyn1/Mpp2/Flrt3/Gria3/Lin7b/Slc6a9/Lyn/Ptprf/Dlgap3/Shisa6/Myd88/Camk2b/Dmtn/Entpd1/Adora1/Camk1/Abr/Gap43/Rapgef4/Itpr1/Camk2a/Lrfn4/Shisa8/Erc1/Cap2/Arc/Dbn1/Adgrb1/Camk2g/Dab1/Syt11/Snap47/Pde4b	60
BP	GO:0090130	tissue migration	50|1439	269|16518	2.16484e-07	7.45366e-06	ENSMUSG00000037225/ENSMUSG00000026923/ENSMUSG00000031565/ENSMUSG00000024087/ENSMUSG00000021701/ENSMUSG00000030123/ENSMUSG00000002985/ENSMUSG00000001507/ENSMUSG00000025351/ENSMUSG00000062960/ENSMUSG00000046768/ENSMUSG00000018593/ENSMUSG00000032359/ENSMUSG00000024659/ENSMUSG00000031841/ENSMUSG00000031486/ENSMUSG00000058325/ENSMUSG00000028480/ENSMUSG00000033170/ENSMUSG00000032194/ENSMUSG00000022475/…	Fgf2/Notch1/Fgfr1/Cyp1b1/Plk2/Plxnd1/Apoe/Itga3/Cd63/Kdr/Rhoj/Sparc/Ctsh/Anxa1/Cdh13/Adgra2/Dock1/Glipr2/Card10/Kank2/Hdac7/Sox9/Itgav/Itgb2/Wnt5a/Tgfb2/Hmgb1/Tgfbr2/Rock2/Sash1/Efna1/Thbs1/Plcg1/Adamts9/Enpp2/Epha2/Pfn2/Itgb1/Dab2ip/Bmp4/Ptgs2/Efnb2/Sp100/Jup/Slit2/Adgrb1/Stat5a/Zeb2/Hmox1/Amotl1	50
BP	GO:0006898	receptor-mediated endocytosis	45|1439	231|16518	2.17495e-07	7.45366e-06	ENSMUSG00000022037/ENSMUSG00000060802/ENSMUSG00000033880/ENSMUSG00000007655/ENSMUSG00000058952/ENSMUSG00000025492/ENSMUSG00000002985/ENSMUSG00000025351/ENSMUSG00000056515/ENSMUSG00000030342/ENSMUSG00000021057/ENSMUSG00000031837/ENSMUSG00000020122/ENSMUSG00000032554/ENSMUSG00000025185/ENSMUSG00000014773/ENSMUSG00000059714/ENSMUSG00000028249/ENSMUSG00000027009/ENSMUSG00000039735/ENSMUSG00000032440/…	Clu/B2m/Lgals3bp/Cav1/Cfi/Ifitm3/Apoe/Cd63/Rab31/Cd9/Akap5/Necab2/Egfr/Trf/Loxl4/Dll1/Flot1/Sdcbp/Itga4/Fnbp1l/Tgfbr2/Lsr/Inpp5f/Gria1/Anxa2/Lrp8/Endou/Ezr/Enpp2/Grk3/Cltb/Scarf2/Lrp1/Scara5/Ldlrad3/Itgb1/Siglech/Gm6970/Ache/Fcer1g/Ramp1/Cav2/Fcrls/Syt11/Ophn1	45
BP	GO:0031346	positive regulation of cell projection organization	69|1439	422|16518	2.25068e-07	7.6068e-06	ENSMUSG00000030309/ENSMUSG00000022893/ENSMUSG00000031565/ENSMUSG00000030123/ENSMUSG00000020467/ENSMUSG00000034394/ENSMUSG00000002985/ENSMUSG00000001507/ENSMUSG00000070509/ENSMUSG00000043850/ENSMUSG00000006435/ENSMUSG00000029838/ENSMUSG00000044674/ENSMUSG00000001313/ENSMUSG00000021057/ENSMUSG00000026640/ENSMUSG00000021068/ENSMUSG00000031517/ENSMUSG00000045136/ENSMUSG00000041936/ENSMUSG00000024143/…	Caprin2/Adamts1/Fgfr1/Plxnd1/Efemp1/Lif/Apoe/Itga3/Rgma/Clrn1/Neurl1a/Ptn/Fzd1/Rnd2/Akap5/Plxna2/Nin/Gpm6a/Tubb2b/Agrn/Rhoq/Ptk7/Wnt5a/Fyn/Ntrk2/Fnbp1l/Ptprz1/Palm/Gprc5b/P2rx7/Lrp8/Plppr5/Plxna1/P3h1/Cd24a/Ptprd/Espn/Enpp2/Cdc42ep4/Lyn/Ptprf/Cul7/Stmn2/Cx3cl1/Amigo1/Fn1/Plxnb2/Cobl/Itgb1/Camk2b/Dab2ip/P2ry12/Bmp4/Camk1/Kctd17/Sept9/Rims1/Cux2/Ache/Fez1/Ndnf/Dbn1/Cdc42ep1/Ripor2/Rab8b/Zeb2/Dzip1/…	69
BP	GO:0007599	hemostasis	33|1439	145|16518	2.26152e-07	7.6068e-06	ENSMUSG00000023224/ENSMUSG00000028583/ENSMUSG00000007655/ENSMUSG00000022912/ENSMUSG00000002985/ENSMUSG00000002602/ENSMUSG00000029231/ENSMUSG00000030342/ENSMUSG00000052920/ENSMUSG00000027712/ENSMUSG00000064210/ENSMUSG00000028128/ENSMUSG00000039005/ENSMUSG00000056724/ENSMUSG00000020120/ENSMUSG00000014361/ENSMUSG00000032231/ENSMUSG00000040152/ENSMUSG00000024164/ENSMUSG00000042228/ENSMUSG00000004266/…	Serping1/Pdpn/Cav1/Pros1/Apoe/Axl/Pdgfra/Cd9/Prkg1/Anxa5/Ano6/F3/Tlr4/Nbeal2/Plek/Mertk/Anxa2/Thbs1/C3/Lyn/Ptpn6/Abat/Cx3cl1/Vwf/Dmtn/Entpd1/P2ry12/Cd34/Fcer1g/Pik3cg/Prkcq/Serpine2/Fzd6	33
BP	GO:0050817	coagulation	33|1439	145|16518	2.26152e-07	7.6068e-06	ENSMUSG00000023224/ENSMUSG00000028583/ENSMUSG00000007655/ENSMUSG00000022912/ENSMUSG00000002985/ENSMUSG00000002602/ENSMUSG00000029231/ENSMUSG00000030342/ENSMUSG00000052920/ENSMUSG00000027712/ENSMUSG00000064210/ENSMUSG00000028128/ENSMUSG00000039005/ENSMUSG00000056724/ENSMUSG00000020120/ENSMUSG00000014361/ENSMUSG00000032231/ENSMUSG00000040152/ENSMUSG00000024164/ENSMUSG00000042228/ENSMUSG00000004266/…	Serping1/Pdpn/Cav1/Pros1/Apoe/Axl/Pdgfra/Cd9/Prkg1/Anxa5/Ano6/F3/Tlr4/Nbeal2/Plek/Mertk/Anxa2/Thbs1/C3/Lyn/Ptpn6/Abat/Cx3cl1/Vwf/Dmtn/Entpd1/P2ry12/Cd34/Fcer1g/Pik3cg/Prkcq/Serpine2/Fzd6	33
BP	GO:0051017	actin filament bundle assembly	34|1439	152|16518	2.31306e-07	7.73243e-06	ENSMUSG00000036995/ENSMUSG00000020388/ENSMUSG00000019997/ENSMUSG00000037736/ENSMUSG00000049493/ENSMUSG00000031328/ENSMUSG00000043079/ENSMUSG00000001313/ENSMUSG00000032194/ENSMUSG00000024397/ENSMUSG00000022469/ENSMUSG00000002233/ENSMUSG00000041959/ENSMUSG00000021998/ENSMUSG00000020120/ENSMUSG00000029860/ENSMUSG00000017144/ENSMUSG00000020580/ENSMUSG00000071176/ENSMUSG00000033542/ENSMUSG00000032402/…	Asap3/Pdlim4/Ctgf/Limch1/Pls1/Flna/Synpo/Rnd2/Kank2/Aif1/Rapgef3/Rhoc/S100a10/Lcp1/Plek/Zyx/Rnd3/Rock2/Arhgef10/Arhgef5/Smad3/Espn/Aif1l/Ezr/Sh3pxd2b/Pfn2/Cx3cl1/Pls3/Dmtn/Tmeff2/Arhgap6/Dbn1/Itgb5/Prkcq	34
BP	GO:1990778	protein localization to cell periphery	53|1439	293|16518	2.34204e-07	7.78156e-06	ENSMUSG00000030341/ENSMUSG00000049493/ENSMUSG00000031328/ENSMUSG00000000957/ENSMUSG00000001507/ENSMUSG00000022656/ENSMUSG00000056515/ENSMUSG00000037031/ENSMUSG00000038235/ENSMUSG00000015647/ENSMUSG00000021057/ENSMUSG00000017400/ENSMUSG00000020122/ENSMUSG00000032412/ENSMUSG00000023992/ENSMUSG00000050335/ENSMUSG00000041959/ENSMUSG00000059714/ENSMUSG00000024143/ENSMUSG00000001521/ENSMUSG00000011751/…	Tnfrsf1a/Pls1/Flna/Mmp14/Itga3/Nectin3/Rab31/Tspan15/F11r/Lama5/Akap5/Stac2/Egfr/Atp1b3/Trem2/Lgals3/S100a10/Flot1/Rhoq/Tulp3/Sptbn4/Cacnb3/Flot2/Palm/Rock2/Fyb/Anxa2/Lin7b/Acsl3/Myadm/Ezr/Epha2/Rab3d/Lrp1/Gnai1/Itgb1/Camk2b/Arl6/Rapgef4/Gpc4/Fcer1g/Ramp1/Clip3/Camk2a/Ehd2/Jup/Tspan14/Rab8b/Iqsec2/Camk2g/Scn3b/Ttc7/Snap47	53
BP	GO:0046578	regulation of Ras protein signal transduction	43|1439	217|16518	2.45679e-07	8.07634e-06	ENSMUSG00000026923/ENSMUSG00000022508/ENSMUSG00000014599/ENSMUSG00000002985/ENSMUSG00000001507/ENSMUSG00000017466/ENSMUSG00000041498/ENSMUSG00000024998/ENSMUSG00000050271/ENSMUSG00000037211/ENSMUSG00000015243/ENSMUSG00000040479/ENSMUSG00000024620/ENSMUSG00000028919/ENSMUSG00000004562/ENSMUSG00000037509/ENSMUSG00000050730/ENSMUSG00000059714/ENSMUSG00000025555/ENSMUSG00000039239/ENSMUSG00000027878/…	Notch1/Bcl6/Csf1/Apoe/Itga3/Timp2/Kif14/Plce1/Prag1/Spry1/Abca1/Dgkz/Pdgfrb/Arhgef19/Arhgef40/Arhgef4/Arhgap42/Flot1/Farp1/Tgfb2/Notch2/Arhgef10/Arhgef5/Rasal3/Cyth4/Rasa4/Rasa2/Arhgef17/Plekhg1/Erbb2/Itgb1/Dab2ip/Cdc42se1/Dock2/Abr/Net1/Trio/Kitl/Plekhg6/Vav1/Ripor2/Iqsec2/Ophn1	43
BP	GO:0031099	regeneration	40|1439	195|16518	2.47296e-07	8.07634e-06	ENSMUSG00000020932/ENSMUSG00000026923/ENSMUSG00000034394/ENSMUSG00000002602/ENSMUSG00000070509/ENSMUSG00000024659/ENSMUSG00000041075/ENSMUSG00000006800/ENSMUSG00000020122/ENSMUSG00000001827/ENSMUSG00000033685/ENSMUSG00000022324/ENSMUSG00000026074/ENSMUSG00000024778/ENSMUSG00000021998/ENSMUSG00000052911/ENSMUSG00000032440/ENSMUSG00000039007/ENSMUSG00000042258/ENSMUSG00000035385/ENSMUSG00000042105/…	Gfap/Notch1/Lif/Axl/Rgma/Anxa1/Fzd7/Sulf2/Egfr/Folr1/Ucp2/Matn2/Map4k4/Fas/Lcp1/Lamb2/Tgfbr2/Cpq/Isl1/Ccl2/Inpp5f/Nrep/Cebpb/Tgfbr3/Gsn/Yap1/Ptprf/Ptpn3/Capn3/Rtn4rl2/Igsf10/Tspo/Rtn4rl1/Gap43/Jam3/Npm1/Cdkn1a/Hmox1/Sox2/Selenon	40
BP	GO:0050730	regulation of peptidyl-tyrosine phosphorylation	45|1439	232|16518	2.47522e-07	8.07634e-06	ENSMUSG00000053113/ENSMUSG00000030341/ENSMUSG00000005087/ENSMUSG00000037405/ENSMUSG00000007655/ENSMUSG00000034394/ENSMUSG00000022906/ENSMUSG00000028517/ENSMUSG00000044716/ENSMUSG00000029231/ENSMUSG00000034422/ENSMUSG00000006435/ENSMUSG00000024621/ENSMUSG00000018899/ENSMUSG00000021756/ENSMUSG00000022892/ENSMUSG00000055737/ENSMUSG00000020122/ENSMUSG00000041936/ENSMUSG00000023992/ENSMUSG00000026395/…	Socs3/Tnfrsf1a/Cd44/Icam1/Cav1/Lif/Parp9/Plpp3/Dok7/Pdgfra/Parp14/Neurl1a/Csf1r/Irf1/Il6st/App/Ghr/Egfr/Agrn/Trem2/Ptprc/Il21/Fyn/Tlr4/Ptprz1/Clcf1/Gprc5b/Isl1/Inpp5f/Efna1/Srcin1/Lrp8/Ptpn1/Cd24a/Mvp/Enpp2/Lyn/Sfrp1/Ptpn6/Itgb1/Dmtn/Adora1/Kitl/Cav2/Zfyve28	45
CC	GO:0042612	MHC class I protein complex	8|1463	11|16707	4.40283e-07	8.59263e-06	ENSMUSG00000035929/ENSMUSG00000061232/ENSMUSG00000060802/ENSMUSG00000073411/ENSMUSG00000067212/ENSMUSG00000073409/ENSMUSG00000026471/ENSMUSG00000060550	H2-Q4/H2-K1/B2m/H2-D1/H2-T23/H2-Q6/Mr1/H2-Q7	8
BP	GO:0031579	membrane raft organization	10|1439	17|16518	2.68428e-07	8.70635e-06	ENSMUSG00000007655/ENSMUSG00000041959/ENSMUSG00000026395/ENSMUSG00000059714/ENSMUSG00000061981/ENSMUSG00000032231/ENSMUSG00000068566/ENSMUSG00000026879/ENSMUSG00000020143/ENSMUSG00000000058	Cav1/S100a10/Ptprc/Flot1/Flot2/Anxa2/Myadm/Gsn/Dock2/Cav2	10
BP	GO:0050818	regulation of coagulation	21|1439	70|16518	2.85139e-07	9.13955e-06	ENSMUSG00000023224/ENSMUSG00000028583/ENSMUSG00000007655/ENSMUSG00000022912/ENSMUSG00000002985/ENSMUSG00000029231/ENSMUSG00000030342/ENSMUSG00000052920/ENSMUSG00000027712/ENSMUSG00000064210/ENSMUSG00000039005/ENSMUSG00000020120/ENSMUSG00000032231/ENSMUSG00000040152/ENSMUSG00000042228/ENSMUSG00000057880/ENSMUSG00000022099/ENSMUSG00000016494/ENSMUSG00000058715/ENSMUSG00000026778/ENSMUSG00000026249	Serping1/Pdpn/Cav1/Pros1/Apoe/Pdgfra/Cd9/Prkg1/Anxa5/Ano6/Tlr4/Plek/Anxa2/Thbs1/Lyn/Abat/Dmtn/Cd34/Fcer1g/Prkcq/Serpine2	21
BP	GO:1903035	negative regulation of response to wounding	21|1439	70|16518	2.85139e-07	9.13955e-06	ENSMUSG00000037225/ENSMUSG00000023224/ENSMUSG00000022912/ENSMUSG00000002985/ENSMUSG00000070509/ENSMUSG00000029231/ENSMUSG00000030342/ENSMUSG00000052920/ENSMUSG00000027712/ENSMUSG00000042105/ENSMUSG00000032231/ENSMUSG00000040152/ENSMUSG00000032402/ENSMUSG00000047139/ENSMUSG00000057880/ENSMUSG00000040136/ENSMUSG00000115388/ENSMUSG00000016494/ENSMUSG00000045287/ENSMUSG00000039546/ENSMUSG00000026249	Fgf2/Serping1/Pros1/Apoe/Rgma/Pdgfra/Cd9/Prkg1/Anxa5/Inpp5f/Anxa2/Thbs1/Smad3/Cd24a/Abat/Abcc8/Eppk1/Cd34/Rtn4rl1/Ajap1/Serpine2	21
BP	GO:0031345	negative regulation of cell projection organization	39|1439	189|16518	2.96276e-07	9.44099e-06	ENSMUSG00000020932/ENSMUSG00000061232/ENSMUSG00000060802/ENSMUSG00000073411/ENSMUSG00000026728/ENSMUSG00000021701/ENSMUSG00000020467/ENSMUSG00000031328/ENSMUSG00000002985/ENSMUSG00000001507/ENSMUSG00000070509/ENSMUSG00000050271/ENSMUSG00000069171/ENSMUSG00000026074/ENSMUSG00000063531/ENSMUSG00000021994/ENSMUSG00000019843/ENSMUSG00000068748/ENSMUSG00000042105/ENSMUSG00000027954/ENSMUSG00000033295/…	Gfap/H2-K1/B2m/H2-D1/Vim/Plk2/Efemp1/Flna/Apoe/Itga3/Rgma/Prag1/Nr2f1/Map4k4/Sema3e/Wnt5a/Fyn/Ptprz1/Inpp5f/Efna1/Ptprf/Lgals1/Sema6a/Lrp1/Stmn2/Pfn2/Trim46/Itgb1/Ccr5/Rtn4rl2/Rtn4rl1/Sema4g/Efnb2/Arpin/Slit2/Dab1/Nfatc4/Inppl1/Ctsz	39
BP	GO:0032963	collagen metabolic process	23|1439	82|16518	3.04169e-07	9.58196e-06	ENSMUSG00000038642/ENSMUSG00000026728/ENSMUSG00000023191/ENSMUSG00000033327/ENSMUSG00000019997/ENSMUSG00000000957/ENSMUSG00000019982/ENSMUSG00000022469/ENSMUSG00000001870/ENSMUSG00000024620/ENSMUSG00000026837/ENSMUSG00000037003/ENSMUSG00000032374/ENSMUSG00000070436/ENSMUSG00000052914/ENSMUSG00000029468/ENSMUSG00000035385/ENSMUSG00000028641/ENSMUSG00000025809/ENSMUSG00000020810/ENSMUSG00000021835/…	Ctss/Vim/P3h3/Tnxb/Ctgf/Mmp14/Myb/Rapgef3/Ltbp1/Pdgfrb/Col5a1/Tns2/Plod2/Serpinh1/Cyp2j6/P2rx7/Ccl2/P3h1/Itgb1/Cygb/Bmp4/Tram2/Emilin1	23
BP	GO:0001912	positive regulation of leukocyte mediated cytotoxicity	19|1439	59|16518	3.04692e-07	9.58196e-06	ENSMUSG00000035929/ENSMUSG00000061232/ENSMUSG00000060802/ENSMUSG00000073411/ENSMUSG00000067212/ENSMUSG00000026395/ENSMUSG00000027718/ENSMUSG00000030124/ENSMUSG00000016206/ENSMUSG00000073409/ENSMUSG00000040511/ENSMUSG00000029468/ENSMUSG00000035385/ENSMUSG00000060550/ENSMUSG00000020919/ENSMUSG00000056116/ENSMUSG00000034116/ENSMUSG00000022378/ENSMUSG00000004043	H2-Q4/H2-K1/B2m/H2-D1/H2-T23/Ptprc/Il21/Lag3/H2-M3/H2-Q6/Pvr/P2rx7/Ccl2/H2-Q7/Stat5b/H2-T22/Vav1/Fam49b/Stat5a	19
BP	GO:0030278	regulation of ossification	38|1439	182|16518	3.05976e-07	9.58196e-06	ENSMUSG00000037225/ENSMUSG00000071637/ENSMUSG00000026923/ENSMUSG00000031565/ENSMUSG00000020393/ENSMUSG00000020641/ENSMUSG00000014599/ENSMUSG00000026674/ENSMUSG00000035692/ENSMUSG00000034957/ENSMUSG00000030669/ENSMUSG00000026185/ENSMUSG00000028195/ENSMUSG00000007041/ENSMUSG00000021756/ENSMUSG00000022475/ENSMUSG00000000567/ENSMUSG00000064210/ENSMUSG00000051159/ENSMUSG00000021994/ENSMUSG00000039239/…	Fgf2/Cebpd/Notch1/Fgfr1/Kremen1/Rsad2/Csf1/Ddr2/Isg15/Cebpa/Calca/Igfbp5/Cyr61/Clic1/Il6st/Hdac7/Sox9/Ano6/Cited1/Wnt5a/Tgfb2/Acvr1/Cdk6/P2rx7/Lmna/Cebpb/Smad3/P3h1/Sfrp1/Cd276/Limd1/Bmp4/Id4/Tmem119/Rassf2/Gdpd2/Trpm4/Lrp5	38
BP	GO:0002764	immune response-regulating signaling pathway	50|1439	272|16518	3.0804e-07	9.59147e-06	ENSMUSG00000037921/ENSMUSG00000020227/ENSMUSG00000030921/ENSMUSG00000007655/ENSMUSG00000020641/ENSMUSG00000069874/ENSMUSG00000057143/ENSMUSG00000040296/ENSMUSG00000026896/ENSMUSG00000023915/ENSMUSG00000029826/ENSMUSG00000032359/ENSMUSG00000018899/ENSMUSG00000026395/ENSMUSG00000027995/ENSMUSG00000059714/ENSMUSG00000036908/ENSMUSG00000003352/ENSMUSG00000001123/ENSMUSG00000019843/ENSMUSG00000016206/…	Ddx60/Irak3/Trim30a/Cav1/Rsad2/Irgm2/Trim12c/Ddx58/Ifih1/Tnfrsf21/Zc3hav1/Ctsh/Irf1/Ptprc/Tlr2/Flot1/Unc93b1/Cacnb3/Lgals9/Fyn/H2-M3/Tlr4/Ptprj/Tril/Hmgb1/Rab7b/Prkcb/Nckap1l/Cyba/Tnip2/Plcg1/Ezr/Cacnb4/Lyn/Pik3ap1/Irak1/Ptpn6/Myd88/Cd276/Irak2/Plekha1/Dab2ip/Prkch/Fcer1g/Mapkapk3/Dhx58/Tirap/Trim5/Cd86/Pde4b	50
BP	GO:0051056	regulation of small GTPase mediated signal transduction	47|1439	249|16518	3.11844e-07	9.65477e-06	ENSMUSG00000026923/ENSMUSG00000022508/ENSMUSG00000014599/ENSMUSG00000002985/ENSMUSG00000001507/ENSMUSG00000017466/ENSMUSG00000041498/ENSMUSG00000024998/ENSMUSG00000050271/ENSMUSG00000037211/ENSMUSG00000015243/ENSMUSG00000040479/ENSMUSG00000024620/ENSMUSG00000004633/ENSMUSG00000028919/ENSMUSG00000004562/ENSMUSG00000037509/ENSMUSG00000050730/ENSMUSG00000059714/ENSMUSG00000025555/ENSMUSG00000039239/…	Notch1/Bcl6/Csf1/Apoe/Itga3/Timp2/Kif14/Plce1/Prag1/Spry1/Abca1/Dgkz/Pdgfrb/Chn2/Arhgef19/Arhgef40/Arhgef4/Arhgap42/Flot1/Farp1/Tgfb2/Notch2/Arhgef10/Arhgef5/Rasal3/Cyth4/Rasa4/Rasa2/Cgnl1/Arhgef17/Plekhg1/Erbb2/Chn1/Itgb1/Dab2ip/Cdc42se1/Dock2/Abr/Net1/Trio/Kitl/Plekhg6/Vav1/Slit2/Ripor2/Iqsec2/Ophn1	47
BP	GO:0002706	regulation of lymphocyte mediated immunity	33|1439	147|16518	3.17299e-07	9.76814e-06	ENSMUSG00000035929/ENSMUSG00000061232/ENSMUSG00000060802/ENSMUSG00000073411/ENSMUSG00000022508/ENSMUSG00000020641/ENSMUSG00000026072/ENSMUSG00000067212/ENSMUSG00000026395/ENSMUSG00000027718/ENSMUSG00000037321/ENSMUSG00000030124/ENSMUSG00000002147/ENSMUSG00000001123/ENSMUSG00000016206/ENSMUSG00000073409/ENSMUSG00000040511/ENSMUSG00000040663/ENSMUSG00000066551/ENSMUSG00000029468/ENSMUSG00000047139/…	H2-Q4/H2-K1/B2m/H2-D1/Bcl6/Rsad2/Il1r1/H2-T23/Ptprc/Il21/Tap1/Lag3/Stat6/Lgals9/H2-M3/H2-Q6/Pvr/Clcf1/Hmgb1/P2rx7/Cd24a/C3/H2-Q7/Ptpn6/Stat5b/Fcer1g/H2-T22/Vsir/Vav1/Fam49b/Stat5a/Arid5a/Trpm4	33
BP	GO:0008347	glial cell migration	18|1439	54|16518	3.47156e-07	1.06273e-05	ENSMUSG00000026728/ENSMUSG00000014599/ENSMUSG00000020467/ENSMUSG00000000957/ENSMUSG00000021665/ENSMUSG00000022324/ENSMUSG00000039239/ENSMUSG00000068748/ENSMUSG00000035385/ENSMUSG00000028613/ENSMUSG00000035352/ENSMUSG00000026193/ENSMUSG00000026883/ENSMUSG00000030541/ENSMUSG00000036353/ENSMUSG00000041736/ENSMUSG00000044117/ENSMUSG00000028519	Vim/Csf1/Efemp1/Mmp14/Hexb/Matn2/Tgfb2/Ptprz1/Ccl2/Lrp8/Ccl12/Fn1/Dab2ip/Idh2/P2ry12/Tspo/2900011O08Rik/Dab1	18
BP	GO:0007259	JAK-STAT cascade	28|1439	114|16518	3.50267e-07	1.06626e-05	ENSMUSG00000004040/ENSMUSG00000053175/ENSMUSG00000026923/ENSMUSG00000053113/ENSMUSG00000030341/ENSMUSG00000024087/ENSMUSG00000007655/ENSMUSG00000034394/ENSMUSG00000022906/ENSMUSG00000034422/ENSMUSG00000024621/ENSMUSG00000018899/ENSMUSG00000026104/ENSMUSG00000021756/ENSMUSG00000055737/ENSMUSG00000034462/ENSMUSG00000026395/ENSMUSG00000027718/ENSMUSG00000019843/ENSMUSG00000040663/ENSMUSG00000042258/…	Stat3/Bcl3/Notch1/Socs3/Tnfrsf1a/Cyp1b1/Cav1/Lif/Parp9/Parp14/Csf1r/Irf1/Stat1/Il6st/Ghr/Pkd2/Ptprc/Il21/Fyn/Clcf1/Isl1/Inpp5f/Ptprd/Lyn/Stat5b/Socs2/Stat5a/Dab1	28
BP	GO:0048863	stem cell differentiation	38|1439	183|16518	3.54303e-07	1.07255e-05	ENSMUSG00000037225/ENSMUSG00000030111/ENSMUSG00000004040/ENSMUSG00000026923/ENSMUSG00000024079/ENSMUSG00000034394/ENSMUSG00000029231/ENSMUSG00000027168/ENSMUSG00000025921/ENSMUSG00000044674/ENSMUSG00000024940/ENSMUSG00000015647/ENSMUSG00000031517/ENSMUSG00000000567/ENSMUSG00000001827/ENSMUSG00000038805/ENSMUSG00000001761/ENSMUSG00000026395/ENSMUSG00000063531/ENSMUSG00000039239/ENSMUSG00000026836/…	Fgf2/A2m/Stat3/Notch1/Eif2ak2/Lif/Pdgfra/Pax6/Rdh10/Fzd1/Ltbp3/Lama5/Gpm6a/Sox9/Folr1/Six3/Smo/Ptprc/Sema3e/Tgfb2/Acvr1/Cdk6/Frzb/Isl1/Cyp26c1/Tead2/Sox6/Yap1/Sema6a/Sfrp1/Anxa6/Efnb1/Fn1/Bmp4/Kitl/Sema4g/Vsir/Zeb2	38
CC	GO:0031256	leading edge membrane	35|1463	164|16707	5.81104e-07	1.09865e-05	ENSMUSG00000005087/ENSMUSG00000028583/ENSMUSG00000030123/ENSMUSG00000040296/ENSMUSG00000021057/ENSMUSG00000015968/ENSMUSG00000035441/ENSMUSG00000024397/ENSMUSG00000027087/ENSMUSG00000021998/ENSMUSG00000068748/ENSMUSG00000020120/ENSMUSG00000035863/ENSMUSG00000053550/ENSMUSG00000018849/ENSMUSG00000020524/ENSMUSG00000027270/ENSMUSG00000017314/ENSMUSG00000001864/ENSMUSG00000052397/ENSMUSG00000028173/…	Cd44/Pdpn/Plxnd1/Ddx58/Akap5/Cacna1d/Myo1d/Aif1/Itgav/Lcp1/Ptprz1/Plek/Palm/Shisa7/Wwc1/Gria1/Lamp5/Mpp2/Aif1l/Ezr/Wls/Epha2/Shisa6/Itgb1/Plekha1/Adora1/Mtss1l/Sgce/Gabra1/Myo1c/Gabrg2/Ptprk/Shisa8/Ripor2/Antxr1	35
BP	GO:0048562	embryonic organ morphogenesis	48|1439	258|16518	3.66028e-07	1.10193e-05	ENSMUSG00000026923/ENSMUSG00000031565/ENSMUSG00000020467/ENSMUSG00000000957/ENSMUSG00000043850/ENSMUSG00000029231/ENSMUSG00000053279/ENSMUSG00000071350/ENSMUSG00000027168/ENSMUSG00000025921/ENSMUSG00000022483/ENSMUSG00000034462/ENSMUSG00000000567/ENSMUSG00000027204/ENSMUSG00000001827/ENSMUSG00000014773/ENSMUSG00000038805/ENSMUSG00000001761/ENSMUSG00000052957/ENSMUSG00000023972/ENSMUSG00000001521/…	Notch1/Fgfr1/Efemp1/Mmp14/Clrn1/Pdgfra/Aldh1a1/Setdb2/Pax6/Rdh10/Col2a1/Pkd2/Sox9/Fbn1/Folr1/Dll1/Six3/Smo/Gas1/Ptk7/Tulp3/Otx1/Kcnq4/Wnt5a/Tgfb2/Acvr1/Ror2/Tgfbr2/Frzb/Efna1/Tead2/Smad3/Rbpms2/Yap1/Epha2/Slc39a1/Ift57/Bmp4/Fgfr2/Abr/Zic1/Lrig1/Vangl2/Pcgf2/Tcf7/Ripor2/Col11a1/Fzd6	48
BP	GO:0061572	actin filament bundle organization	34|1439	155|16518	3.77775e-07	1.13104e-05	ENSMUSG00000036995/ENSMUSG00000020388/ENSMUSG00000019997/ENSMUSG00000037736/ENSMUSG00000049493/ENSMUSG00000031328/ENSMUSG00000043079/ENSMUSG00000001313/ENSMUSG00000032194/ENSMUSG00000024397/ENSMUSG00000022469/ENSMUSG00000002233/ENSMUSG00000041959/ENSMUSG00000021998/ENSMUSG00000020120/ENSMUSG00000029860/ENSMUSG00000017144/ENSMUSG00000020580/ENSMUSG00000071176/ENSMUSG00000033542/ENSMUSG00000032402/…	Asap3/Pdlim4/Ctgf/Limch1/Pls1/Flna/Synpo/Rnd2/Kank2/Aif1/Rapgef3/Rhoc/S100a10/Lcp1/Plek/Zyx/Rnd3/Rock2/Arhgef10/Arhgef5/Smad3/Espn/Aif1l/Ezr/Sh3pxd2b/Pfn2/Cx3cl1/Pls3/Dmtn/Tmeff2/Arhgap6/Dbn1/Itgb5/Prkcq	34
BP	GO:0002824	positive regulation of adaptive immune response based on somatic recombination of immune receptors built from immunoglobulin superfamily domains	27|1439	108|16518	3.85373e-07	1.14125e-05	ENSMUSG00000035929/ENSMUSG00000061232/ENSMUSG00000060802/ENSMUSG00000073411/ENSMUSG00000020641/ENSMUSG00000026072/ENSMUSG00000067212/ENSMUSG00000024659/ENSMUSG00000018899/ENSMUSG00000026395/ENSMUSG00000026177/ENSMUSG00000002147/ENSMUSG00000016206/ENSMUSG00000073409/ENSMUSG00000040511/ENSMUSG00000040663/ENSMUSG00000029468/ENSMUSG00000016496/ENSMUSG00000047139/ENSMUSG00000024164/ENSMUSG00000073421/…	H2-Q4/H2-K1/B2m/H2-D1/Rsad2/Il1r1/H2-T23/Anxa1/Irf1/Ptprc/Slc11a1/Stat6/H2-M3/H2-Q6/Pvr/Clcf1/P2rx7/Cd274/Cd24a/C3/H2-Ab1/H2-Q7/Fcer1g/H2-T22/Fam49b/Arid5a/Prkcq	27
BP	GO:0016525	negative regulation of angiogenesis	27|1439	108|16518	3.85373e-07	1.14125e-05	ENSMUSG00000026923/ENSMUSG00000022893/ENSMUSG00000021701/ENSMUSG00000016918/ENSMUSG00000030671/ENSMUSG00000052336/ENSMUSG00000034394/ENSMUSG00000018593/ENSMUSG00000029838/ENSMUSG00000034855/ENSMUSG00000026104/ENSMUSG00000033170/ENSMUSG00000023885/ENSMUSG00000063531/ENSMUSG00000039239/ENSMUSG00000020580/ENSMUSG00000035385/ENSMUSG00000040152/ENSMUSG00000030022/ENSMUSG00000006445/ENSMUSG00000019647/…	Notch1/Adamts1/Plk2/Sulf1/Pde3b/Cx3cr1/Lif/Sparc/Ptn/Cxcl10/Stat1/Card10/Thbs2/Sema3e/Tgfb2/Rock2/Ccl2/Thbs1/Adamts9/Epha2/Sema6a/Abcc8/Dab2ip/Tcf4/Emilin1/Adgrb1/Col4a2	27
BP	GO:0051251	positive regulation of lymphocyte activation	44|1439	228|16518	3.89172e-07	1.14627e-05	ENSMUSG00000007655/ENSMUSG00000022508/ENSMUSG00000027962/ENSMUSG00000055447/ENSMUSG00000000957/ENSMUSG00000002602/ENSMUSG00000067212/ENSMUSG00000019982/ENSMUSG00000024659/ENSMUSG00000018899/ENSMUSG00000021756/ENSMUSG00000024397/ENSMUSG00000041272/ENSMUSG00000026395/ENSMUSG00000027718/ENSMUSG00000002147/ENSMUSG00000001123/ENSMUSG00000061981/ENSMUSG00000016206/ENSMUSG00000039005/ENSMUSG00000040663/…	Cav1/Bcl6/Vcam1/Cd47/Mmp14/Axl/H2-T23/Myb/Anxa1/Irf1/Il6st/Aif1/Tox/Ptprc/Il21/Stat6/Lgals9/Flot2/H2-M3/Tlr4/Clcf1/Hmgb1/Tgfbr2/Ccl2/Cd274/Nckap1l/Rasal3/Tnip2/Cd24a/H2-Ab1/Ccdc88b/Lgals1/Myd88/Cd276/Stat5b/Efnb1/Zmiz1/Vsir/Efnb2/Fam49b/Cdkn1a/Stat5a/Prkcq/Cd86	44
CC	GO:1902495	transmembrane transporter complex	51|1463	285|16707	6.49125e-07	1.19006e-05	ENSMUSG00000035200/ENSMUSG00000032172/ENSMUSG00000045246/ENSMUSG00000034810/ENSMUSG00000034714/ENSMUSG00000007041/ENSMUSG00000033161/ENSMUSG00000001985/ENSMUSG00000025892/ENSMUSG00000015968/ENSMUSG00000031075/ENSMUSG00000010066/ENSMUSG00000032412/ENSMUSG00000064210/ENSMUSG00000054720/ENSMUSG00000056073/ENSMUSG00000026833/ENSMUSG00000028631/ENSMUSG00000017167/ENSMUSG00000003352/ENSMUSG00000016346/…	Chrnb4/Olfm2/Kcng4/Scn7a/Ttyh2/Clic1/Atp1a1/Grik3/Gria4/Cacna1d/Ano1/Cacna2d2/Atp1b3/Ano6/Lrrc8c/Grik2/Olfm1/Kcnq4/Cntnap1/Cacnb3/Kcnq2/Kcnip1/Shisa7/Gria1/Kcne1l/Cacna1b/Scn3a/Gria3/Kcna5/Cacna1a/Cacnb4/Dlgap3/Htr3a/Shisa6/Amigo1/Cacna1g/Abcc8/Gabra1/Scnn1a/Gabrg2/Scn1a/Scn8a/Kcnk1/Shisa8/Ttyh3/Cnga3/Scn3b/Trpm4/Nos1ap/Gabrb3/Pde4b	51
BP	GO:0002757	immune response-activating signal transduction	48|1439	259|16518	4.12128e-07	1.20736e-05	ENSMUSG00000037921/ENSMUSG00000020227/ENSMUSG00000030921/ENSMUSG00000007655/ENSMUSG00000020641/ENSMUSG00000069874/ENSMUSG00000057143/ENSMUSG00000040296/ENSMUSG00000026896/ENSMUSG00000023915/ENSMUSG00000029826/ENSMUSG00000018899/ENSMUSG00000026395/ENSMUSG00000027995/ENSMUSG00000059714/ENSMUSG00000036908/ENSMUSG00000003352/ENSMUSG00000001123/ENSMUSG00000019843/ENSMUSG00000039005/ENSMUSG00000025314/…	Ddx60/Irak3/Trim30a/Cav1/Rsad2/Irgm2/Trim12c/Ddx58/Ifih1/Tnfrsf21/Zc3hav1/Irf1/Ptprc/Tlr2/Flot1/Unc93b1/Cacnb3/Lgals9/Fyn/Tlr4/Ptprj/Tril/Hmgb1/Rab7b/Prkcb/Nckap1l/Cyba/Tnip2/Plcg1/Ezr/Cacnb4/Lyn/Pik3ap1/Irak1/Ptpn6/Myd88/Cd276/Irak2/Plekha1/Dab2ip/Prkch/Fcer1g/Mapkapk3/Dhx58/Tirap/Trim5/Cd86/Pde4b	48
BP	GO:0032675	regulation of interleukin-6 production	28|1439	115|16518	4.25018e-07	1.23187e-05	ENSMUSG00000030341/ENSMUSG00000020227/ENSMUSG00000030921/ENSMUSG00000055447/ENSMUSG00000040296/ENSMUSG00000026896/ENSMUSG00000024810/ENSMUSG00000027995/ENSMUSG00000021994/ENSMUSG00000001123/ENSMUSG00000039005/ENSMUSG00000066551/ENSMUSG00000029468/ENSMUSG00000042258/ENSMUSG00000052688/ENSMUSG00000022488/ENSMUSG00000006519/ENSMUSG00000056501/ENSMUSG00000047139/ENSMUSG00000038058/ENSMUSG00000004266/…	Tnfrsf1a/Irak3/Trim30a/Cd47/Ddx58/Ifih1/Il33/Tlr2/Wnt5a/Lgals9/Tlr4/Hmgb1/P2rx7/Isl1/Rab7b/Nckap1l/Cyba/Cebpb/Cd24a/Nod1/Ptpn6/Myd88/Ccr5/Fcer1g/Tirap/Arid5a/Il17rc/Syt11	28
BP	GO:0097696	STAT cascade	28|1439	115|16518	4.25018e-07	1.23187e-05	ENSMUSG00000004040/ENSMUSG00000053175/ENSMUSG00000026923/ENSMUSG00000053113/ENSMUSG00000030341/ENSMUSG00000024087/ENSMUSG00000007655/ENSMUSG00000034394/ENSMUSG00000022906/ENSMUSG00000034422/ENSMUSG00000024621/ENSMUSG00000018899/ENSMUSG00000026104/ENSMUSG00000021756/ENSMUSG00000055737/ENSMUSG00000034462/ENSMUSG00000026395/ENSMUSG00000027718/ENSMUSG00000019843/ENSMUSG00000040663/ENSMUSG00000042258/…	Stat3/Bcl3/Notch1/Socs3/Tnfrsf1a/Cyp1b1/Cav1/Lif/Parp9/Parp14/Csf1r/Irf1/Stat1/Il6st/Ghr/Pkd2/Ptprc/Il21/Fyn/Clcf1/Isl1/Inpp5f/Ptprd/Lyn/Stat5b/Socs2/Stat5a/Dab1	28
BP	GO:0002822	regulation of adaptive immune response based on somatic recombination of immune receptors built from immunoglobulin superfamily domains	33|1439	149|16518	4.41729e-07	1.27353e-05	ENSMUSG00000035929/ENSMUSG00000061232/ENSMUSG00000060802/ENSMUSG00000073411/ENSMUSG00000022508/ENSMUSG00000020641/ENSMUSG00000026072/ENSMUSG00000067212/ENSMUSG00000024810/ENSMUSG00000024659/ENSMUSG00000018899/ENSMUSG00000026395/ENSMUSG00000026177/ENSMUSG00000002147/ENSMUSG00000016206/ENSMUSG00000073409/ENSMUSG00000040511/ENSMUSG00000040663/ENSMUSG00000066551/ENSMUSG00000029468/ENSMUSG00000016496/…	H2-Q4/H2-K1/B2m/H2-D1/Bcl6/Rsad2/Il1r1/H2-T23/Il33/Anxa1/Irf1/Ptprc/Slc11a1/Stat6/H2-M3/H2-Q6/Pvr/Clcf1/Hmgb1/P2rx7/Cd274/Cd24a/C3/H2-Ab1/H2-Q7/Ptpn6/Fcer1g/H2-T22/Vsir/Fam49b/Arid5a/Prkcq/Trpm4	33
BP	GO:0009306	protein secretion	76|1439	489|16518	4.48802e-07	1.28712e-05	ENSMUSG00000026923/ENSMUSG00000064246/ENSMUSG00000020641/ENSMUSG00000040612/ENSMUSG00000032172/ENSMUSG00000040296/ENSMUSG00000026204/ENSMUSG00000026896/ENSMUSG00000023915/ENSMUSG00000067212/ENSMUSG00000024810/ENSMUSG00000024659/ENSMUSG00000024621/ENSMUSG00000027712/ENSMUSG00000021057/ENSMUSG00000015968/ENSMUSG00000020122/ENSMUSG00000031075/ENSMUSG00000055980/ENSMUSG00000003161/ENSMUSG00000015243/…	Notch1/Chil1/Rsad2/Ildr2/Olfm2/Ddx58/Ptprn/Ifih1/Tnfrsf21/H2-T23/Il33/Anxa1/Csf1r/Anxa5/Akap5/Cacna1d/Egfr/Ano1/Irs1/Sri/Abca1/Gbp5/Ucp2/Itgav/Casp1/Tlr2/Il17ra/Map4k4/Wnt5a/Lgals9/Tgfb2/Oxct1/Tlr4/Cyp2j6/Hmgb1/Plek/P2rx7/Isl1/Cd274/Srcin1/P3h1/Plcg1/Ezr/Wls/Rhbdf1/Lyn/Rab3d/Cd300c2/Sfrp1/Steap3/Ptprn2/Abat/Cx3cl1/Cd276/Fn1/Abcc8/Ccr5/Dmtn/Idh2/Arfgap3/Pde1c/Cd34/Rapgef4/Vsnl1/Anxa4/Midn/Ang/Arid…	76
BP	GO:0060326	cell chemotaxis	45|1439	237|16518	4.65397e-07	1.32772e-05	ENSMUSG00000037225/ENSMUSG00000028635/ENSMUSG00000026923/ENSMUSG00000031565/ENSMUSG00000027962/ENSMUSG00000014599/ENSMUSG00000052336/ENSMUSG00000062960/ENSMUSG00000029231/ENSMUSG00000024659/ENSMUSG00000030669/ENSMUSG00000034855/ENSMUSG00000041120/ENSMUSG00000024397/ENSMUSG00000064210/ENSMUSG00000050335/ENSMUSG00000031714/ENSMUSG00000024620/ENSMUSG00000002897/ENSMUSG00000021994/ENSMUSG00000039239/…	Fgf2/Edn2/Notch1/Fgfr1/Vcam1/Csf1/Cx3cr1/Kdr/Pdgfra/Anxa1/Calca/Cxcl10/Nbl1/Aif1/Ano6/Lgals3/Gab1/Pdgfrb/Il17ra/Wnt5a/Tgfb2/Hmgb1/Ccl2/Arhgef5/Thbs1/Nckap1l/Enpp2/Lyn/Epha2/Ccl12/Cx3cl1/Ccr5/Ccl28/Jam3/Itga9/Fcer1g/Ccl9/Vav1/Slit2/Ripor2/Prkcq/Slc8b1/Trpm4/Il17rc/Pde4b	45
BP	GO:0007266	Rho protein signal transduction	38|1439	185|16518	4.73055e-07	1.33571e-05	ENSMUSG00000028583/ENSMUSG00000022508/ENSMUSG00000038816/ENSMUSG00000002985/ENSMUSG00000001507/ENSMUSG00000046768/ENSMUSG00000050271/ENSMUSG00000001313/ENSMUSG00000031841/ENSMUSG00000015243/ENSMUSG00000002233/ENSMUSG00000024620/ENSMUSG00000028919/ENSMUSG00000004562/ENSMUSG00000037509/ENSMUSG00000050730/ENSMUSG00000059714/ENSMUSG00000024143/ENSMUSG00000025555/ENSMUSG00000017144/ENSMUSG00000020580/…	Pdpn/Bcl6/Ctnnal1/Apoe/Itga3/Rhoj/Prag1/Rnd2/Cdh13/Abca1/Rhoc/Pdgfrb/Arhgef19/Arhgef40/Arhgef4/Arhgap42/Flot1/Rhoq/Farp1/Rnd3/Rock2/Arhgef10/Arhgef5/Cdc42ep4/Arhgef17/Plekhg1/Itgb1/Cdc42se1/Abr/Net1/Trio/Col1a2/Plekhg6/Vangl2/Rhobtb3/Vav1/Ripor2/Ophn1	38
BP	GO:0002224	toll-like receptor signaling pathway	24|1439	90|16518	4.73101e-07	1.33571e-05	ENSMUSG00000020227/ENSMUSG00000030921/ENSMUSG00000007655/ENSMUSG00000020641/ENSMUSG00000018899/ENSMUSG00000027995/ENSMUSG00000059714/ENSMUSG00000036908/ENSMUSG00000001123/ENSMUSG00000039005/ENSMUSG00000043496/ENSMUSG00000066551/ENSMUSG00000052688/ENSMUSG00000006519/ENSMUSG00000059866/ENSMUSG00000042228/ENSMUSG00000025017/ENSMUSG00000031392/ENSMUSG00000032508/ENSMUSG00000060477/ENSMUSG00000026883/…	Irak3/Trim30a/Cav1/Rsad2/Irf1/Tlr2/Flot1/Unc93b1/Lgals9/Tlr4/Tril/Hmgb1/Rab7b/Cyba/Tnip2/Lyn/Pik3ap1/Irak1/Myd88/Irak2/Dab2ip/Mapkapk3/Tirap/Cd86	24
BP	GO:0072659	protein localization to plasma membrane	46|1439	245|16518	4.86485e-07	1.36642e-05	ENSMUSG00000030341/ENSMUSG00000049493/ENSMUSG00000031328/ENSMUSG00000000957/ENSMUSG00000001507/ENSMUSG00000022656/ENSMUSG00000056515/ENSMUSG00000037031/ENSMUSG00000038235/ENSMUSG00000015647/ENSMUSG00000021057/ENSMUSG00000017400/ENSMUSG00000020122/ENSMUSG00000032412/ENSMUSG00000023992/ENSMUSG00000050335/ENSMUSG00000041959/ENSMUSG00000059714/ENSMUSG00000024143/ENSMUSG00000011751/ENSMUSG00000003352/…	Tnfrsf1a/Pls1/Flna/Mmp14/Itga3/Nectin3/Rab31/Tspan15/F11r/Lama5/Akap5/Stac2/Egfr/Atp1b3/Trem2/Lgals3/S100a10/Flot1/Rhoq/Sptbn4/Cacnb3/Flot2/Palm/Rock2/Fyb/Anxa2/Acsl3/Myadm/Ezr/Epha2/Rab3d/Lrp1/Itgb1/Camk2b/Arl6/Fcer1g/Ramp1/Clip3/Camk2a/Ehd2/Jup/Tspan14/Rab8b/Camk2g/Scn3b/Ttc7	46
CC	GO:0044853	plasma membrane raft	27|1463	111|16707	7.691e-07	1.36855e-05	ENSMUSG00000034845/ENSMUSG00000048612/ENSMUSG00000007655/ENSMUSG00000033161/ENSMUSG00000004044/ENSMUSG00000031841/ENSMUSG00000055980/ENSMUSG00000035441/ENSMUSG00000032412/ENSMUSG00000057729/ENSMUSG00000001761/ENSMUSG00000035805/ENSMUSG00000059714/ENSMUSG00000061981/ENSMUSG00000032440/ENSMUSG00000003153/ENSMUSG00000028613/ENSMUSG00000052397/ENSMUSG00000036353/ENSMUSG00000020612/ENSMUSG00000032487/…	Plvap/Myof/Cav1/Atp1a1/Cavin1/Cdh13/Irs1/Myo1d/Atp1b3/Prtn3/Smo/Mlc1/Flot1/Flot2/Tgfbr2/Slc2a3/Lrp8/Ezr/P2ry12/Prkar1a/Ptgs2/Cav2/Ehd2/Hck/Hmox1/Slc5a7/Nos1ap	27
BP	GO:0001649	osteoblast differentiation	36|1439	171|16518	5.03529e-07	1.40328e-05	ENSMUSG00000037225/ENSMUSG00000071637/ENSMUSG00000026923/ENSMUSG00000052837/ENSMUSG00000031565/ENSMUSG00000027803/ENSMUSG00000026674/ENSMUSG00000034957/ENSMUSG00000026185/ENSMUSG00000028195/ENSMUSG00000007041/ENSMUSG00000044674/ENSMUSG00000021756/ENSMUSG00000022475/ENSMUSG00000001761/ENSMUSG00000051159/ENSMUSG00000026836/ENSMUSG00000040274/ENSMUSG00000028063/ENSMUSG00000056501/ENSMUSG00000032402/…	Fgf2/Cebpd/Notch1/Junb/Fgfr1/Wwtr1/Ddr2/Cebpa/Igfbp5/Cyr61/Clic1/Fzd1/Il6st/Hdac7/Smo/Cited1/Acvr1/Cdk6/Lmna/Cebpb/Smad3/Sh3pxd2b/Epha2/Sfrp1/Cd276/Limd1/Bmp4/Ache/Id4/Tmem119/Pth1r/Rassf2/Gdpd2/Trpm4/Sox2/Lrp5	36
BP	GO:0003013	circulatory system process	69|1439	431|16518	5.04759e-07	1.40328e-05	ENSMUSG00000028635/ENSMUSG00000026414/ENSMUSG00000037405/ENSMUSG00000007655/ENSMUSG00000019997/ENSMUSG00000024935/ENSMUSG00000031328/ENSMUSG00000002985/ENSMUSG00000027803/ENSMUSG00000030669/ENSMUSG00000038235/ENSMUSG00000032562/ENSMUSG00000019789/ENSMUSG00000033161/ENSMUSG00000064179/ENSMUSG00000051359/ENSMUSG00000044080/ENSMUSG00000052920/ENSMUSG00000015968/ENSMUSG00000020122/ENSMUSG00000003161/…	Edn2/Tnnt2/Icam1/Cav1/Ctgf/Slc1a1/Flna/Apoe/Wwtr1/Calca/F11r/Gnai2/Hey2/Atp1a1/Tnnt1/Ncald/S100a1/Prkg1/Cacna1d/Egfr/Sri/Cacna2d2/Agrn/Dll1/Pde5a/Arhgap42/Grip2/Plcb3/Sptbn4/Fyn/Tgfb2/Tmem65/Mgll/Ptprj/Ddah1/Gclm/Slc4a5/Oxtr/Dmpk/Rasl10b/Kcne1l/Cacna1b/Thra/Cyba/Smad3/Kcna5/Ptgs1/Yap1/Abat/Cx3cl1/Cacna1g/Adora1/Rgs4/Abr/Cd34/Col1a2/Tbxas1/Scn1a/Ptgs2/Jup/Slit2/Scn3b/Spx/Hmox1/Trpm4/Gucy1a1/Nos1ap…	69
BP	GO:0002711	positive regulation of T cell mediated immunity	17|1439	50|16518	5.31799e-07	1.47095e-05	ENSMUSG00000035929/ENSMUSG00000061232/ENSMUSG00000060802/ENSMUSG00000073411/ENSMUSG00000020641/ENSMUSG00000026072/ENSMUSG00000067212/ENSMUSG00000026395/ENSMUSG00000016206/ENSMUSG00000073409/ENSMUSG00000040511/ENSMUSG00000029468/ENSMUSG00000047139/ENSMUSG00000060550/ENSMUSG00000056116/ENSMUSG00000022378/ENSMUSG00000037447	H2-Q4/H2-K1/B2m/H2-D1/Rsad2/Il1r1/H2-T23/Ptprc/H2-M3/H2-Q6/Pvr/P2rx7/Cd24a/H2-Q7/H2-T22/Fam49b/Arid5a	17
CC	GO:0098984	neuron to neuron synapse	60|1463	360|16707	8.53621e-07	1.47554e-05	ENSMUSG00000004040/ENSMUSG00000053931/ENSMUSG00000043079/ENSMUSG00000026072/ENSMUSG00000006435/ENSMUSG00000033161/ENSMUSG00000021057/ENSMUSG00000032060/ENSMUSG00000025892/ENSMUSG00000040479/ENSMUSG00000056073/ENSMUSG00000001761/ENSMUSG00000013033/ENSMUSG00000030098/ENSMUSG00000021585/ENSMUSG00000047181/ENSMUSG00000019843/ENSMUSG00000055254/ENSMUSG00000039943/ENSMUSG00000068748/ENSMUSG00000031626/…	Stat3/Cnn3/Synpo/Il1r1/Neurl1a/Atp1a1/Akap5/Cryab/Gria4/Dgkz/Grik2/Smo/Adgrl1/Grip2/Cast/Samd14/Fyn/Ntrk2/Plcb4/Ptprz1/Sorbs2/Palm/Shisa7/Gria1/Srcin1/Ctnna2/Lrp8/Insyn1/Mpp2/Flrt3/Gria3/Lin7b/Slc6a9/Lyn/Ptprf/Dlgap3/Shisa6/Myd88/Camk2b/Dmtn/Entpd1/Adora1/Camk1/Abr/Gap43/Rapgef4/Itpr1/Camk2a/Lrfn4/Shisa8/Erc1/Cap2/Arc/Dbn1/Adgrb1/Camk2g/Dab1/Syt11/Snap47/Pde4b	60
BP	GO:0050803	regulation of synapse structure or activity	43|1439	223|16518	5.38189e-07	1.48111e-05	ENSMUSG00000030309/ENSMUSG00000002985/ENSMUSG00000006435/ENSMUSG00000018593/ENSMUSG00000029838/ENSMUSG00000022892/ENSMUSG00000028184/ENSMUSG00000031517/ENSMUSG00000041936/ENSMUSG00000023885/ENSMUSG00000036295/ENSMUSG00000013033/ENSMUSG00000025555/ENSMUSG00000021994/ENSMUSG00000019843/ENSMUSG00000055254/ENSMUSG00000053550/ENSMUSG00000049112/ENSMUSG00000027954/ENSMUSG00000038453/ENSMUSG00000030409/…	Caprin2/Apoe/Neurl1a/Sparc/Ptn/App/Adgrl2/Gpm6a/Agrn/Thbs2/Lrrn3/Adgrl1/Farp1/Wnt5a/Fyn/Ntrk2/Shisa7/Oxtr/Efna1/Srcin1/Dmpk/Ctnna2/Lrp8/Flrt3/Ptprd/Ptprf/Shisa6/Amigo1/Amigo2/Camk2b/Dab2ip/Camk1/Gap43/Rapgef4/Gpc4/Cux2/Slitrk5/Lrfn4/Arc/Dbn1/Adgrb1/Sybu/Nfatc4	43
BP	GO:0050680	negative regulation of epithelial cell proliferation	29|1439	123|16518	5.501e-07	1.50628e-05	ENSMUSG00000007655/ENSMUSG00000016918/ENSMUSG00000002985/ENSMUSG00000018593/ENSMUSG00000027168/ENSMUSG00000029838/ENSMUSG00000026104/ENSMUSG00000000567/ENSMUSG00000052957/ENSMUSG00000021994/ENSMUSG00000039239/ENSMUSG00000008575/ENSMUSG00000040274/ENSMUSG00000042258/ENSMUSG00000040152/ENSMUSG00000035352/ENSMUSG00000031548/ENSMUSG00000032965/ENSMUSG00000026883/ENSMUSG00000115388/ENSMUSG00000021835/…	Cav1/Sulf1/Apoe/Sparc/Pax6/Ptn/Stat1/Sox9/Gas1/Wnt5a/Tgfb2/Nfib/Cdk6/Isl1/Thbs1/Ccl12/Sfrp1/Ift57/Dab2ip/Eppk1/Bmp4/Fgfr2/Wdr13/Cav2/Efnb2/Ptprk/Npm1/Ctsl/Sox2	29
BP	GO:0072001	renal system development	51|1439	285|16518	5.53954e-07	1.50925e-05	ENSMUSG00000037225/ENSMUSG00000026923/ENSMUSG00000022893/ENSMUSG00000031502/ENSMUSG00000031565/ENSMUSG00000016918/ENSMUSG00000034394/ENSMUSG00000001507/ENSMUSG00000027803/ENSMUSG00000029231/ENSMUSG00000024998/ENSMUSG00000032359/ENSMUSG00000025921/ENSMUSG00000026104/ENSMUSG00000006800/ENSMUSG00000015647/ENSMUSG00000037211/ENSMUSG00000034462/ENSMUSG00000032194/ENSMUSG00000000567/ENSMUSG00000027204/…	Fgf2/Notch1/Adamts1/Col4a1/Fgfr1/Sulf1/Lif/Itga3/Wwtr1/Pdgfra/Plce1/Ctsh/Rdh10/Stat1/Sulf2/Lama5/Spry1/Pkd2/Kank2/Sox9/Fbn1/Dll1/Lgr5/Pdgfrb/Smo/Ass1/Cited1/Tns2/Wnt5a/Glis2/Tgfb2/Lamb2/Gcnt4/Smad3/Cd24a/Gcnt1/Ampd2/Notch3/Yap1/Sfrp1/Bmp4/Cd34/Mpst/Fat4/Vangl2/Anxa4/Efnb2/Slit2/Itga6/Timeless/Arid5b	51
BP	GO:0045123	cellular extravasation	16|1439	45|16518	5.71986e-07	1.55062e-05	ENSMUSG00000034845/ENSMUSG00000037405/ENSMUSG00000027962/ENSMUSG00000052336/ENSMUSG00000026072/ENSMUSG00000057729/ENSMUSG00000000290/ENSMUSG00000027009/ENSMUSG00000035776/ENSMUSG00000035385/ENSMUSG00000038843/ENSMUSG00000031778/ENSMUSG00000025809/ENSMUSG00000074715/ENSMUSG00000017631/ENSMUSG00000036006	Plvap/Icam1/Vcam1/Cx3cr1/Il1r1/Prtn3/Itgb2/Itga4/Cd99l2/Ccl2/Gcnt1/Cx3cl1/Itgb1/Ccl28/Abr/Ripor2	16
BP	GO:0031343	positive regulation of cell killing	20|1439	67|16518	5.96067e-07	1.60791e-05	ENSMUSG00000035929/ENSMUSG00000061232/ENSMUSG00000060802/ENSMUSG00000073411/ENSMUSG00000067212/ENSMUSG00000026395/ENSMUSG00000027718/ENSMUSG00000030124/ENSMUSG00000016206/ENSMUSG00000073409/ENSMUSG00000040511/ENSMUSG00000029468/ENSMUSG00000035385/ENSMUSG00000060550/ENSMUSG00000020919/ENSMUSG00000079227/ENSMUSG00000056116/ENSMUSG00000034116/ENSMUSG00000022378/ENSMUSG00000004043	H2-Q4/H2-K1/B2m/H2-D1/H2-T23/Ptprc/Il21/Lag3/H2-M3/H2-Q6/Pvr/P2rx7/Ccl2/H2-Q7/Stat5b/Ccr5/H2-T22/Vav1/Fam49b/Stat5a	20
BP	GO:0002703	regulation of leukocyte mediated immunity	39|1439	194|16518	5.99452e-07	1.60907e-05	ENSMUSG00000035929/ENSMUSG00000061232/ENSMUSG00000060802/ENSMUSG00000073411/ENSMUSG00000022508/ENSMUSG00000020641/ENSMUSG00000026072/ENSMUSG00000040296/ENSMUSG00000067212/ENSMUSG00000046718/ENSMUSG00000026395/ENSMUSG00000027718/ENSMUSG00000037321/ENSMUSG00000030124/ENSMUSG00000002147/ENSMUSG00000001123/ENSMUSG00000016206/ENSMUSG00000073409/ENSMUSG00000039005/ENSMUSG00000040511/ENSMUSG00000040663/…	H2-Q4/H2-K1/B2m/H2-D1/Bcl6/Rsad2/Il1r1/Ddx58/H2-T23/Bst2/Ptprc/Il21/Tap1/Lag3/Stat6/Lgals9/H2-M3/H2-Q6/Tlr4/Pvr/Clcf1/Hmgb1/P2rx7/Cd24a/C3/Lyn/H2-Q7/Ptpn6/Stat5b/Abr/Fcer1g/H2-T22/Vsir/Vav1/Fam49b/Stat5a/Arid5a/Hmox1/Trpm4	39
BP	GO:0050807	regulation of synapse organization	42|1439	217|16518	6.54952e-07	1.74943e-05	ENSMUSG00000030309/ENSMUSG00000002985/ENSMUSG00000006435/ENSMUSG00000018593/ENSMUSG00000029838/ENSMUSG00000022892/ENSMUSG00000028184/ENSMUSG00000031517/ENSMUSG00000041936/ENSMUSG00000023885/ENSMUSG00000036295/ENSMUSG00000013033/ENSMUSG00000025555/ENSMUSG00000021994/ENSMUSG00000019843/ENSMUSG00000055254/ENSMUSG00000053550/ENSMUSG00000049112/ENSMUSG00000027954/ENSMUSG00000038453/ENSMUSG00000030409/…	Caprin2/Apoe/Neurl1a/Sparc/Ptn/App/Adgrl2/Gpm6a/Agrn/Thbs2/Lrrn3/Adgrl1/Farp1/Wnt5a/Fyn/Ntrk2/Shisa7/Oxtr/Efna1/Srcin1/Dmpk/Ctnna2/Lrp8/Flrt3/Ptprd/Ptprf/Shisa6/Amigo1/Amigo2/Camk2b/Dab2ip/Camk1/Gap43/Rapgef4/Gpc4/Cux2/Slitrk5/Lrfn4/Arc/Dbn1/Adgrb1/Nfatc4	42
MF	GO:0022836	gated channel activity	55|1421	306|16303	1.75282e-07	1.8202e-05	ENSMUSG00000035200/ENSMUSG00000045246/ENSMUSG00000034810/ENSMUSG00000052387/ENSMUSG00000028255/ENSMUSG00000034714/ENSMUSG00000007041/ENSMUSG00000001985/ENSMUSG00000074991/ENSMUSG00000025892/ENSMUSG00000015968/ENSMUSG00000031075/ENSMUSG00000034462/ENSMUSG00000010066/ENSMUSG00000064210/ENSMUSG00000056073/ENSMUSG00000027087/ENSMUSG00000028631/ENSMUSG00000003352/ENSMUSG00000016346/ENSMUSG00000029468/…	Chrnb4/Kcng4/Scn7a/Trpm3/Clca1/Ttyh2/Clic1/Grik3/Gabrr3/Gria4/Cacna1d/Ano1/Pkd2/Cacna2d2/Ano6/Grik2/Itgav/Kcnq4/Cacnb3/Kcnq2/P2rx7/Kcnip1/Gria1/Anxa2/Kcne1l/Cacna1b/Itpr3/Scn3a/Gria3/Kcna5/Grik1/Cacna1a/Jph1/Cacnb4/Tpcn2/Htr3a/Anxa6/Kcnt1/Cacna1g/Kcnk9/Gabra1/Scnn1a/Gabrg2/Scn1a/Itpr1/Scn8a/Kcnk1/Ttyh3/Cnga3/Tpcn1/Scn3b/Trpm4/Kcnk3/Piezo1/Gabrb3	55
MF	GO:0022839	ion gated channel activity	54|1421	299|16303	1.92818e-07	1.8202e-05	ENSMUSG00000035200/ENSMUSG00000045246/ENSMUSG00000034810/ENSMUSG00000052387/ENSMUSG00000028255/ENSMUSG00000034714/ENSMUSG00000007041/ENSMUSG00000001985/ENSMUSG00000074991/ENSMUSG00000025892/ENSMUSG00000015968/ENSMUSG00000031075/ENSMUSG00000034462/ENSMUSG00000010066/ENSMUSG00000064210/ENSMUSG00000056073/ENSMUSG00000027087/ENSMUSG00000028631/ENSMUSG00000003352/ENSMUSG00000016346/ENSMUSG00000029468/…	Chrnb4/Kcng4/Scn7a/Trpm3/Clca1/Ttyh2/Clic1/Grik3/Gabrr3/Gria4/Cacna1d/Ano1/Pkd2/Cacna2d2/Ano6/Grik2/Itgav/Kcnq4/Cacnb3/Kcnq2/P2rx7/Kcnip1/Gria1/Anxa2/Kcne1l/Cacna1b/Itpr3/Scn3a/Gria3/Kcna5/Grik1/Cacna1a/Jph1/Cacnb4/Tpcn2/Htr3a/Anxa6/Kcnt1/Cacna1g/Kcnk9/Gabra1/Scnn1a/Gabrg2/Scn1a/Itpr1/Scn8a/Kcnk1/Ttyh3/Cnga3/Tpcn1/Scn3b/Trpm4/Kcnk3/Gabrb3	54
BP	GO:2000181	negative regulation of blood vessel morphogenesis	27|1439	111|16518	6.94172e-07	1.84514e-05	ENSMUSG00000026923/ENSMUSG00000022893/ENSMUSG00000021701/ENSMUSG00000016918/ENSMUSG00000030671/ENSMUSG00000052336/ENSMUSG00000034394/ENSMUSG00000018593/ENSMUSG00000029838/ENSMUSG00000034855/ENSMUSG00000026104/ENSMUSG00000033170/ENSMUSG00000023885/ENSMUSG00000063531/ENSMUSG00000039239/ENSMUSG00000020580/ENSMUSG00000035385/ENSMUSG00000040152/ENSMUSG00000030022/ENSMUSG00000006445/ENSMUSG00000019647/…	Notch1/Adamts1/Plk2/Sulf1/Pde3b/Cx3cr1/Lif/Sparc/Ptn/Cxcl10/Stat1/Card10/Thbs2/Sema3e/Tgfb2/Rock2/Ccl2/Thbs1/Adamts9/Epha2/Sema6a/Abcc8/Dab2ip/Tcf4/Emilin1/Adgrb1/Col4a2	27
CC	GO:0045177	apical part of cell	64|1463	396|16707	1.11741e-06	1.87787e-05	ENSMUSG00000022146/ENSMUSG00000026923/ENSMUSG00000005087/ENSMUSG00000028583/ENSMUSG00000030077/ENSMUSG00000007655/ENSMUSG00000027962/ENSMUSG00000025492/ENSMUSG00000024935/ENSMUSG00000031207/ENSMUSG00000026674/ENSMUSG00000030342/ENSMUSG00000024659/ENSMUSG00000031538/ENSMUSG00000033161/ENSMUSG00000046718/ENSMUSG00000030737/ENSMUSG00000022892/ENSMUSG00000021068/ENSMUSG00000015968/ENSMUSG00000020122/…	Osmr/Notch1/Cd44/Pdpn/Chl1/Cav1/Vcam1/Ifitm3/Slc1a1/Msn/Ddr2/Cd9/Anxa1/Plat/Atp1a1/Bst2/Slco2b1/App/Nin/Cacna1d/Egfr/Ano1/Trf/Mfrp/Mgst1/Folr1/Dll1/Rapgef3/Pdgfrb/Mlc1/Mal/Fas/Cacnb3/Acvr1/Pard3b/Sorbs2/Oxtr/Itpr3/Cyba/Kcna5/Ezr/Erbb2/Nod1/Anxa6/Fn1/Aqp5/Cd34/Fat4/Rapgef4/Scnn1a/Vangl2/Ajap1/Anxa4/Abcg2/Kcnk1/Itpk1/Pth1r/Ctsl/Ripor2/Dab1/Slc5a7/Fzd6/Abcb1b/Amotl1	64
BP	GO:0030323	respiratory tube development	38|1439	188|16518	7.22324e-07	1.91065e-05	ENSMUSG00000037225/ENSMUSG00000028635/ENSMUSG00000026923/ENSMUSG00000028583/ENSMUSG00000064246/ENSMUSG00000031565/ENSMUSG00000019997/ENSMUSG00000034394/ENSMUSG00000000957/ENSMUSG00000001507/ENSMUSG00000029231/ENSMUSG00000018593/ENSMUSG00000032359/ENSMUSG00000034957/ENSMUSG00000029838/ENSMUSG00000025921/ENSMUSG00000026185/ENSMUSG00000015647/ENSMUSG00000037211/ENSMUSG00000020122/ENSMUSG00000000567/…	Fgf2/Edn2/Notch1/Pdpn/Chil1/Fgfr1/Ctgf/Lif/Mmp14/Itga3/Pdgfra/Sparc/Ctsh/Cebpa/Ptn/Rdh10/Igfbp5/Lama5/Spry1/Egfr/Sox9/Pdgfrb/Ptk7/Tulp3/Lipa/Wnt5a/Nfib/Hmgb1/Tgfbr2/Thra/Foxp4/Yap1/Bmp4/Vangl2/Lama1/Timeless/Selenon/Ctsz	38
BP	GO:0001916	positive regulation of T cell mediated cytotoxicity	13|1439	31|16518	7.29215e-07	1.91192e-05	ENSMUSG00000035929/ENSMUSG00000061232/ENSMUSG00000060802/ENSMUSG00000073411/ENSMUSG00000067212/ENSMUSG00000026395/ENSMUSG00000016206/ENSMUSG00000073409/ENSMUSG00000040511/ENSMUSG00000029468/ENSMUSG00000060550/ENSMUSG00000056116/ENSMUSG00000022378	H2-Q4/H2-K1/B2m/H2-D1/H2-T23/Ptprc/H2-M3/H2-Q6/Pvr/P2rx7/H2-Q7/H2-T22/Fam49b	13
BP	GO:0032970	regulation of actin filament-based process	59|1439	352|16518	7.30529e-07	1.91192e-05	ENSMUSG00000026414/ENSMUSG00000036995/ENSMUSG00000028583/ENSMUSG00000037405/ENSMUSG00000007655/ENSMUSG00000020388/ENSMUSG00000019997/ENSMUSG00000037736/ENSMUSG00000031328/ENSMUSG00000043079/ENSMUSG00000038235/ENSMUSG00000024621/ENSMUSG00000033161/ENSMUSG00000046718/ENSMUSG00000001313/ENSMUSG00000029622/ENSMUSG00000003161/ENSMUSG00000032194/ENSMUSG00000021676/ENSMUSG00000034616/ENSMUSG00000004665/…	Tnnt2/Asap3/Pdpn/Icam1/Cav1/Pdlim4/Ctgf/Limch1/Flna/Synpo/F11r/Csf1r/Atp1a1/Bst2/Rnd2/Arpc1b/Sri/Kank2/Iqgap2/Ssh3/Cnn2/Rapgef3/Rhoc/S100a10/Arhgef19/Sema3e/Sptbn4/Tgfb2/Capg/Plek/Rnd3/Rock2/Arhgef10/Arhgef5/Nckap1l/Smad3/Myadm/Sh3pxd2b/Gsn/Cdc42ep4/Pfn2/Cx3cl1/Dmtn/Tmeff2/Adora1/Rgs4/Arhgap6/Jam3/Vangl2/Myo1c/Plekhh2/Arpin/Jup/Slit2/Dbn1/Hck/Prkcq/Trpm4/Pde4b	59
BP	GO:0003170	heart valve development	17|1439	51|16518	7.33331e-07	1.91192e-05	ENSMUSG00000026923/ENSMUSG00000030341/ENSMUSG00000028599/ENSMUSG00000056427/ENSMUSG00000028195/ENSMUSG00000019789/ENSMUSG00000000567/ENSMUSG00000026833/ENSMUSG00000039239/ENSMUSG00000026836/ENSMUSG00000027878/ENSMUSG00000032440/ENSMUSG00000027954/ENSMUSG00000030022/ENSMUSG00000021835/ENSMUSG00000031558/ENSMUSG00000029163	Notch1/Tnfrsf1a/Tnfrsf1b/Slit3/Cyr61/Hey2/Sox9/Olfm1/Tgfb2/Acvr1/Notch2/Tgfbr2/Efna1/Adamts9/Bmp4/Slit2/Emilin1	17
CC	GO:0034702	ion channel complex	48|1463	267|16707	1.19897e-06	1.96048e-05	ENSMUSG00000035200/ENSMUSG00000032172/ENSMUSG00000045246/ENSMUSG00000034810/ENSMUSG00000034714/ENSMUSG00000007041/ENSMUSG00000001985/ENSMUSG00000025892/ENSMUSG00000015968/ENSMUSG00000031075/ENSMUSG00000010066/ENSMUSG00000064210/ENSMUSG00000054720/ENSMUSG00000056073/ENSMUSG00000026833/ENSMUSG00000028631/ENSMUSG00000017167/ENSMUSG00000003352/ENSMUSG00000016346/ENSMUSG00000053519/ENSMUSG00000053550/…	Chrnb4/Olfm2/Kcng4/Scn7a/Ttyh2/Clic1/Grik3/Gria4/Cacna1d/Ano1/Cacna2d2/Ano6/Lrrc8c/Grik2/Olfm1/Kcnq4/Cntnap1/Cacnb3/Kcnq2/Kcnip1/Shisa7/Gria1/Kcne1l/Cacna1b/Scn3a/Gria3/Kcna5/Cacna1a/Cacnb4/Dlgap3/Htr3a/Shisa6/Amigo1/Cacna1g/Abcc8/Gabra1/Scnn1a/Gabrg2/Scn1a/Scn8a/Kcnk1/Shisa8/Ttyh3/Scn3b/Trpm4/Nos1ap/Gabrb3/Pde4b	48
MF	GO:0022838	substrate-specific channel activity	65|1421	389|16303	2.28895e-07	1.96434e-05	ENSMUSG00000035200/ENSMUSG00000045246/ENSMUSG00000059336/ENSMUSG00000034810/ENSMUSG00000052387/ENSMUSG00000018862/ENSMUSG00000028255/ENSMUSG00000034714/ENSMUSG00000007041/ENSMUSG00000001985/ENSMUSG00000074991/ENSMUSG00000025892/ENSMUSG00000015968/ENSMUSG00000031075/ENSMUSG00000031517/ENSMUSG00000034462/ENSMUSG00000010066/ENSMUSG00000064210/ENSMUSG00000054720/ENSMUSG00000056073/ENSMUSG00000027087/…	Chrnb4/Kcng4/Slc14a1/Scn7a/Trpm3/Otop3/Clca1/Ttyh2/Clic1/Grik3/Gabrr3/Gria4/Cacna1d/Ano1/Gpm6a/Pkd2/Cacna2d2/Ano6/Lrrc8c/Grik2/Itgav/Kcnq4/Cacnb3/Kcnq2/P2rx7/Kcnip1/Gria1/Anxa2/Kcne1l/Cacna1b/Itpr3/Scn3a/Gria3/Kcna5/Grik1/Slc1a4/Cacna1a/Jph1/Cacnb4/Tpcn2/Slc26a7/Htr3a/Anxa6/Kcnt1/Cacna1g/Abcc8/Aqp5/Kcnk9/Gabra1/Scnn1a/Gabrg2/Scn1a/Itpr1/Scn8a/Kcnk1/Ttyh3/Cnga3/Tpcn1/Trpm1/Scn3b/Trpm4/Slc24a2/Kcnk…	65
BP	GO:1902105	regulation of leukocyte differentiation	46|1439	249|16518	7.84096e-07	2.02482e-05	ENSMUSG00000023367/ENSMUSG00000022508/ENSMUSG00000029810/ENSMUSG00000014599/ENSMUSG00000034394/ENSMUSG00000000957/ENSMUSG00000002602/ENSMUSG00000036896/ENSMUSG00000019982/ENSMUSG00000024659/ENSMUSG00000024621/ENSMUSG00000018899/ENSMUSG00000030579/ENSMUSG00000037465/ENSMUSG00000027204/ENSMUSG00000041272/ENSMUSG00000026395/ENSMUSG00000046402/ENSMUSG00000027718/ENSMUSG00000024778/ENSMUSG00000001123/…	Tmem176a/Bcl6/Tmem176b/Csf1/Lif/Mmp14/Axl/C1qc/Myb/Anxa1/Csf1r/Irf1/Tyrobp/Klf10/Fbn1/Tox/Ptprc/Rbp1/Il21/Fas/Lgals9/H2-M3/Ror2/Cdk6/Hmgb1/Notch2/Runx1/Tgfbr2/Trib1/Nckap1l/Cebpb/Cd24a/Zfp36l1/Lyn/Erbb2/Sfrp1/Ptpn6/Stat5b/Bmp4/Kitl/Zmiz1/Nrarp/Vsir/Zfp608/Stat5a/Rassf2	46
BP	GO:0001763	morphogenesis of a branching structure	39|1439	196|16518	7.87461e-07	2.02482e-05	ENSMUSG00000037225/ENSMUSG00000026923/ENSMUSG00000053113/ENSMUSG00000031502/ENSMUSG00000031565/ENSMUSG00000016918/ENSMUSG00000003534/ENSMUSG00000030123/ENSMUSG00000014599/ENSMUSG00000037820/ENSMUSG00000000957/ENSMUSG00000029231/ENSMUSG00000032359/ENSMUSG00000025921/ENSMUSG00000015647/ENSMUSG00000037211/ENSMUSG00000034462/ENSMUSG00000000567/ENSMUSG00000001761/ENSMUSG00000051159/ENSMUSG00000063531/…	Fgf2/Notch1/Socs3/Col4a1/Fgfr1/Sulf1/Ddr1/Plxnd1/Csf1/Tgm2/Mmp14/Pdgfra/Ctsh/Rdh10/Lama5/Spry1/Pkd2/Sox9/Smo/Cited1/Sema3e/Wnt5a/Acvr1/Tgfbr2/Plxna1/Yap1/Epha2/Sfrp1/Bmp4/Fat4/Vangl2/Nrarp/St14/Lama1/Slit2/Timeless/Nfatc4/Lrp5/Ctsz	39
BP	GO:0051250	negative regulation of lymphocyte activation	29|1439	125|16518	7.8778e-07	2.02482e-05	ENSMUSG00000022508/ENSMUSG00000002602/ENSMUSG00000023915/ENSMUSG00000024659/ENSMUSG00000018899/ENSMUSG00000053965/ENSMUSG00000024778/ENSMUSG00000030124/ENSMUSG00000001123/ENSMUSG00000016206/ENSMUSG00000066551/ENSMUSG00000014361/ENSMUSG00000016496/ENSMUSG00000056501/ENSMUSG00000047139/ENSMUSG00000073421/ENSMUSG00000042228/ENSMUSG00000062312/ENSMUSG00000031548/ENSMUSG00000004266/ENSMUSG00000035914/…	Bcl6/Axl/Tnfrsf21/Anxa1/Irf1/Pde5a/Fas/Lag3/Lgals9/H2-M3/Hmgb1/Mertk/Cd274/Cebpb/Cd24a/H2-Ab1/Lyn/Erbb2/Sfrp1/Ptpn6/Cd276/Bmp4/Prkar1a/Nrarp/Vsir/Pag1/Zfp608/Ripor2/Cd86	29
BP	GO:0060541	respiratory system development	41|1439	211|16518	7.96417e-07	2.03741e-05	ENSMUSG00000037225/ENSMUSG00000028635/ENSMUSG00000026923/ENSMUSG00000028583/ENSMUSG00000064246/ENSMUSG00000031565/ENSMUSG00000019997/ENSMUSG00000034394/ENSMUSG00000000957/ENSMUSG00000001507/ENSMUSG00000029231/ENSMUSG00000018593/ENSMUSG00000032359/ENSMUSG00000034957/ENSMUSG00000029838/ENSMUSG00000025921/ENSMUSG00000026185/ENSMUSG00000015647/ENSMUSG00000037211/ENSMUSG00000020122/ENSMUSG00000031075/…	Fgf2/Edn2/Notch1/Pdpn/Chil1/Fgfr1/Ctgf/Lif/Mmp14/Itga3/Pdgfra/Sparc/Ctsh/Cebpa/Ptn/Rdh10/Igfbp5/Lama5/Spry1/Egfr/Ano1/Sox9/Pdgfrb/Ass1/Ptk7/Tulp3/Lipa/Wnt5a/Nfib/Hmgb1/Tgfbr2/Thra/Foxp4/Yap1/Speg/Bmp4/Vangl2/Lama1/Timeless/Selenon/Ctsz	41
BP	GO:0043542	endothelial cell migration	38|1439	189|16518	8.29541e-07	2.11223e-05	ENSMUSG00000037225/ENSMUSG00000026923/ENSMUSG00000031565/ENSMUSG00000024087/ENSMUSG00000021701/ENSMUSG00000030123/ENSMUSG00000002985/ENSMUSG00000062960/ENSMUSG00000046768/ENSMUSG00000018593/ENSMUSG00000024659/ENSMUSG00000031841/ENSMUSG00000031486/ENSMUSG00000033170/ENSMUSG00000022475/ENSMUSG00000027087/ENSMUSG00000000290/ENSMUSG00000021994/ENSMUSG00000066551/ENSMUSG00000020580/ENSMUSG00000015305/…	Fgf2/Notch1/Fgfr1/Cyp1b1/Plk2/Plxnd1/Apoe/Kdr/Rhoj/Sparc/Anxa1/Cdh13/Adgra2/Card10/Hdac7/Itgav/Itgb2/Wnt5a/Hmgb1/Rock2/Sash1/Efna1/Thbs1/Plcg1/Adamts9/Epha2/Itgb1/Dab2ip/Bmp4/Ptgs2/Efnb2/Sp100/Jup/Slit2/Adgrb1/Stat5a/Hmox1/Amotl1	38
BP	GO:0045667	regulation of osteoblast differentiation	27|1439	112|16518	8.39748e-07	2.11891e-05	ENSMUSG00000037225/ENSMUSG00000071637/ENSMUSG00000026923/ENSMUSG00000031565/ENSMUSG00000026674/ENSMUSG00000034957/ENSMUSG00000026185/ENSMUSG00000028195/ENSMUSG00000007041/ENSMUSG00000021756/ENSMUSG00000022475/ENSMUSG00000051159/ENSMUSG00000026836/ENSMUSG00000040274/ENSMUSG00000028063/ENSMUSG00000056501/ENSMUSG00000032402/ENSMUSG00000031548/ENSMUSG00000035914/ENSMUSG00000025239/ENSMUSG00000021835/…	Fgf2/Cebpd/Notch1/Fgfr1/Ddr2/Cebpa/Igfbp5/Cyr61/Clic1/Il6st/Hdac7/Cited1/Acvr1/Cdk6/Lmna/Cebpb/Smad3/Sfrp1/Cd276/Limd1/Bmp4/Id4/Tmem119/Rassf2/Gdpd2/Trpm4/Lrp5	27
BP	GO:0050729	positive regulation of inflammatory response	25|1439	99|16518	8.40954e-07	2.11891e-05	ENSMUSG00000030341/ENSMUSG00000038642/ENSMUSG00000055447/ENSMUSG00000037820/ENSMUSG00000024810/ENSMUSG00000034957/ENSMUSG00000020122/ENSMUSG00000105504/ENSMUSG00000027995/ENSMUSG00000053965/ENSMUSG00000002897/ENSMUSG00000021994/ENSMUSG00000039005/ENSMUSG00000008734/ENSMUSG00000047139/ENSMUSG00000024164/ENSMUSG00000032508/ENSMUSG00000031778/ENSMUSG00000020919/ENSMUSG00000079227/ENSMUSG00000058715/…	Tnfrsf1a/Ctss/Cd47/Tgm2/Il33/Cebpa/Egfr/Gbp5/Tlr2/Pde5a/Il17ra/Wnt5a/Tlr4/Gprc5b/Cd24a/C3/Myd88/Cx3cl1/Stat5b/Ccr5/Fcer1g/Ptgs2/Stat5a/Pik3cg/Il17rc	25
BP	GO:0003179	heart valve morphogenesis	15|1439	41|16518	8.43829e-07	2.11891e-05	ENSMUSG00000026923/ENSMUSG00000056427/ENSMUSG00000028195/ENSMUSG00000019789/ENSMUSG00000000567/ENSMUSG00000026833/ENSMUSG00000039239/ENSMUSG00000026836/ENSMUSG00000027878/ENSMUSG00000032440/ENSMUSG00000027954/ENSMUSG00000030022/ENSMUSG00000021835/ENSMUSG00000031558/ENSMUSG00000029163	Notch1/Slit3/Cyr61/Hey2/Sox9/Olfm1/Tgfb2/Acvr1/Notch2/Tgfbr2/Efna1/Adamts9/Bmp4/Slit2/Emilin1	15
BP	GO:0001655	urogenital system development	55|1439	321|16518	8.50947e-07	2.12698e-05	ENSMUSG00000037225/ENSMUSG00000026923/ENSMUSG00000022893/ENSMUSG00000031502/ENSMUSG00000031565/ENSMUSG00000016918/ENSMUSG00000034394/ENSMUSG00000001507/ENSMUSG00000027803/ENSMUSG00000029231/ENSMUSG00000024998/ENSMUSG00000032359/ENSMUSG00000024659/ENSMUSG00000025921/ENSMUSG00000026104/ENSMUSG00000006800/ENSMUSG00000015647/ENSMUSG00000037211/ENSMUSG00000034462/ENSMUSG00000032194/ENSMUSG00000000567/…	Fgf2/Notch1/Adamts1/Col4a1/Fgfr1/Sulf1/Lif/Itga3/Wwtr1/Pdgfra/Plce1/Ctsh/Anxa1/Rdh10/Stat1/Sulf2/Lama5/Spry1/Pkd2/Kank2/Sox9/Fbn1/Dll1/Lgr5/Pdgfrb/Smo/Ass1/Cited1/Tns2/Wnt5a/Glis2/Tgfb2/Acvr1/Lamb2/Gcnt4/Smad3/Cd24a/Gcnt1/Ampd2/Notch3/Yap1/Sfrp1/Bmp4/Cd34/Mpst/Fat4/Vangl2/Id4/Anxa4/Efnb2/Slit2/Itga6/Stat5a/Timeless/Arid5b	55
CC	GO:1990351	transporter complex	51|1463	293|16707	1.52708e-06	2.43127e-05	ENSMUSG00000035200/ENSMUSG00000032172/ENSMUSG00000045246/ENSMUSG00000034810/ENSMUSG00000034714/ENSMUSG00000007041/ENSMUSG00000033161/ENSMUSG00000001985/ENSMUSG00000025892/ENSMUSG00000015968/ENSMUSG00000031075/ENSMUSG00000010066/ENSMUSG00000032412/ENSMUSG00000064210/ENSMUSG00000054720/ENSMUSG00000056073/ENSMUSG00000026833/ENSMUSG00000028631/ENSMUSG00000017167/ENSMUSG00000003352/ENSMUSG00000016346/…	Chrnb4/Olfm2/Kcng4/Scn7a/Ttyh2/Clic1/Atp1a1/Grik3/Gria4/Cacna1d/Ano1/Cacna2d2/Atp1b3/Ano6/Lrrc8c/Grik2/Olfm1/Kcnq4/Cntnap1/Cacnb3/Kcnq2/Kcnip1/Shisa7/Gria1/Kcne1l/Cacna1b/Scn3a/Gria3/Kcna5/Cacna1a/Cacnb4/Dlgap3/Htr3a/Shisa6/Amigo1/Cacna1g/Abcc8/Gabra1/Scnn1a/Gabrg2/Scn1a/Scn8a/Kcnk1/Shisa8/Ttyh3/Cnga3/Scn3b/Trpm4/Nos1ap/Gabrb3/Pde4b	51
BP	GO:0002709	regulation of T cell mediated immunity	20|1439	69|16518	1.00386e-06	2.49773e-05	ENSMUSG00000035929/ENSMUSG00000061232/ENSMUSG00000060802/ENSMUSG00000073411/ENSMUSG00000020641/ENSMUSG00000026072/ENSMUSG00000067212/ENSMUSG00000026395/ENSMUSG00000016206/ENSMUSG00000073409/ENSMUSG00000040511/ENSMUSG00000066551/ENSMUSG00000029468/ENSMUSG00000047139/ENSMUSG00000060550/ENSMUSG00000056116/ENSMUSG00000020101/ENSMUSG00000022378/ENSMUSG00000037447/ENSMUSG00000038260	H2-Q4/H2-K1/B2m/H2-D1/Rsad2/Il1r1/H2-T23/Ptprc/H2-M3/H2-Q6/Pvr/Hmgb1/P2rx7/Cd24a/H2-Q7/H2-T22/Vsir/Fam49b/Arid5a/Trpm4	20
BP	GO:0030099	myeloid cell differentiation	57|1439	339|16518	1.01191e-06	2.50631e-05	ENSMUSG00000004040/ENSMUSG00000060802/ENSMUSG00000052837/ENSMUSG00000022508/ENSMUSG00000014599/ENSMUSG00000034394/ENSMUSG00000036896/ENSMUSG00000035692/ENSMUSG00000044786/ENSMUSG00000019982/ENSMUSG00000034957/ENSMUSG00000024026/ENSMUSG00000024621/ENSMUSG00000026104/ENSMUSG00000030339/ENSMUSG00000022892/ENSMUSG00000030579/ENSMUSG00000037465/ENSMUSG00000032554/ENSMUSG00000057729/ENSMUSG00000027204/…	Stat3/B2m/Junb/Bcl6/Csf1/Lif/C1qc/Isg15/Zfp36/Myb/Cebpa/Glo1/Csf1r/Stat1/Ltbr/App/Tyrobp/Klf10/Trf/Prtn3/Fbn1/Dll1/Trem2/Sbno2/Rbp1/Irf8/Fas/Ror2/Nbeal2/Cdk6/Hmgb1/Notch2/Runx1/Tgfbr2/Rab7b/Trib1/Anxa2/Nckap1l/Thra/Cebpb/Sox6/Zfp36l1/Lyn/Epha2/Sfrp1/Ptpn6/Gas2l1/Stat5b/Dmtn/Bmp4/Kitl/Fcer1g/Gab2/Stat5a/Rassf2/Ikzf1/Sfxn1	57
MF	GO:0015267	channel activity	67|1421	410|16303	3.48586e-07	2.53127e-05	ENSMUSG00000035200/ENSMUSG00000024411/ENSMUSG00000045246/ENSMUSG00000059336/ENSMUSG00000034810/ENSMUSG00000052387/ENSMUSG00000018862/ENSMUSG00000028255/ENSMUSG00000034714/ENSMUSG00000007041/ENSMUSG00000001985/ENSMUSG00000074991/ENSMUSG00000025892/ENSMUSG00000015968/ENSMUSG00000031075/ENSMUSG00000031517/ENSMUSG00000034462/ENSMUSG00000010066/ENSMUSG00000064210/ENSMUSG00000054720/ENSMUSG00000056073/…	Chrnb4/Aqp4/Kcng4/Slc14a1/Scn7a/Trpm3/Otop3/Clca1/Ttyh2/Clic1/Grik3/Gabrr3/Gria4/Cacna1d/Ano1/Gpm6a/Pkd2/Cacna2d2/Ano6/Lrrc8c/Grik2/Itgav/Kcnq4/Cacnb3/Kcnq2/P2rx7/Kcnip1/Gria1/Anxa2/Kcne1l/Cacna1b/Itpr3/Scn3a/Gria3/Kcna5/Grik1/Slc1a4/Cacna1a/Jph1/Cacnb4/Tpcn2/Slc26a7/Htr3a/Anxa6/Kcnt1/Cacna1g/Abcc8/Aqp5/Kcnk9/Gabra1/Scnn1a/Gabrg2/Scn1a/Itpr1/Scn8a/Kcnk1/Ttyh3/Cnga3/Tpcn1/Trpm1/Scn3b/Trpm4/Slc24a2…	67
MF	GO:0022803	passive transmembrane transporter activity	67|1421	410|16303	3.48586e-07	2.53127e-05	ENSMUSG00000035200/ENSMUSG00000024411/ENSMUSG00000045246/ENSMUSG00000059336/ENSMUSG00000034810/ENSMUSG00000052387/ENSMUSG00000018862/ENSMUSG00000028255/ENSMUSG00000034714/ENSMUSG00000007041/ENSMUSG00000001985/ENSMUSG00000074991/ENSMUSG00000025892/ENSMUSG00000015968/ENSMUSG00000031075/ENSMUSG00000031517/ENSMUSG00000034462/ENSMUSG00000010066/ENSMUSG00000064210/ENSMUSG00000054720/ENSMUSG00000056073/…	Chrnb4/Aqp4/Kcng4/Slc14a1/Scn7a/Trpm3/Otop3/Clca1/Ttyh2/Clic1/Grik3/Gabrr3/Gria4/Cacna1d/Ano1/Gpm6a/Pkd2/Cacna2d2/Ano6/Lrrc8c/Grik2/Itgav/Kcnq4/Cacnb3/Kcnq2/P2rx7/Kcnip1/Gria1/Anxa2/Kcne1l/Cacna1b/Itpr3/Scn3a/Gria3/Kcna5/Grik1/Slc1a4/Cacna1a/Jph1/Cacnb4/Tpcn2/Slc26a7/Htr3a/Anxa6/Kcnt1/Cacna1g/Abcc8/Aqp5/Kcnk9/Gabra1/Scnn1a/Gabrg2/Scn1a/Itpr1/Scn8a/Kcnk1/Ttyh3/Cnga3/Tpcn1/Trpm1/Scn3b/Trpm4/Slc24a2…	67
BP	GO:1903531	negative regulation of secretion by cell	39|1439	198|16518	1.02926e-06	2.53775e-05	ENSMUSG00000028635/ENSMUSG00000026923/ENSMUSG00000030341/ENSMUSG00000020641/ENSMUSG00000028599/ENSMUSG00000034394/ENSMUSG00000023915/ENSMUSG00000024810/ENSMUSG00000024659/ENSMUSG00000032562/ENSMUSG00000052920/ENSMUSG00000027712/ENSMUSG00000055980/ENSMUSG00000033685/ENSMUSG00000026074/ENSMUSG00000021071/ENSMUSG00000001123/ENSMUSG00000038453/ENSMUSG00000047250/ENSMUSG00000052397/ENSMUSG00000020282/…	Edn2/Notch1/Tnfrsf1a/Rsad2/Tnfrsf1b/Lif/Tnfrsf21/Il33/Anxa1/Gnai2/Prkg1/Anxa5/Irs1/Ucp2/Map4k4/Trim9/Lgals9/Srcin1/Ptgs1/Ezr/Rhbdf1/Sfrp1/Abat/Cx3cl1/Fn1/Abcc8/Idh2/Entpd1/P2ry12/Adora1/Abr/Pde1c/Cd34/Vsnl1/Anxa4/Midn/Crhbp/Hmox1/Syt11	39
BP	GO:1905314	semi-lunar valve development	11|1439	23|16518	1.06604e-06	2.61659e-05	ENSMUSG00000026923/ENSMUSG00000030341/ENSMUSG00000028599/ENSMUSG00000056427/ENSMUSG00000019789/ENSMUSG00000039239/ENSMUSG00000027878/ENSMUSG00000027954/ENSMUSG00000021835/ENSMUSG00000031558/ENSMUSG00000029163	Notch1/Tnfrsf1a/Tnfrsf1b/Slit3/Hey2/Tgfb2/Notch2/Efna1/Bmp4/Slit2/Emilin1	11
BP	GO:0032635	interleukin-6 production	28|1439	120|16518	1.07385e-06	2.62396e-05	ENSMUSG00000030341/ENSMUSG00000020227/ENSMUSG00000030921/ENSMUSG00000055447/ENSMUSG00000040296/ENSMUSG00000026896/ENSMUSG00000024810/ENSMUSG00000027995/ENSMUSG00000021994/ENSMUSG00000001123/ENSMUSG00000039005/ENSMUSG00000066551/ENSMUSG00000029468/ENSMUSG00000042258/ENSMUSG00000052688/ENSMUSG00000022488/ENSMUSG00000006519/ENSMUSG00000056501/ENSMUSG00000047139/ENSMUSG00000038058/ENSMUSG00000004266/…	Tnfrsf1a/Irak3/Trim30a/Cd47/Ddx58/Ifih1/Il33/Tlr2/Wnt5a/Lgals9/Tlr4/Hmgb1/P2rx7/Isl1/Rab7b/Nckap1l/Cyba/Cebpb/Cd24a/Nod1/Ptpn6/Myd88/Ccr5/Fcer1g/Tirap/Arid5a/Il17rc/Syt11	28
CC	GO:0042383	sarcolemma	33|1463	157|16707	1.73043e-06	2.68438e-05	ENSMUSG00000068699/ENSMUSG00000027962/ENSMUSG00000031207/ENSMUSG00000024659/ENSMUSG00000033161/ENSMUSG00000027712/ENSMUSG00000017400/ENSMUSG00000029156/ENSMUSG00000015968/ENSMUSG00000003161/ENSMUSG00000041936/ENSMUSG00000022462/ENSMUSG00000059714/ENSMUSG00000024960/ENSMUSG00000024302/ENSMUSG00000024778/ENSMUSG00000003352/ENSMUSG00000069833/ENSMUSG00000032231/ENSMUSG00000042828/ENSMUSG00000060429/…	Flnc/Vcam1/Msn/Anxa1/Atp1a1/Anxa5/Stac2/Sgcb/Cacna1d/Sri/Agrn/Slc38a2/Flot1/Plcb3/Dtna/Fas/Cacnb3/Ahnak/Anxa2/Trim72/Sntb1/Ezr/Anxa6/Capn3/Itgb1/Abcc8/Sgce/Cib2/Scn1a/Prkcq/Slc8b1/Stbd1/Nos1ap	33
BP	GO:0014013	regulation of gliogenesis	29|1439	127|16518	1.11745e-06	2.71829e-05	ENSMUSG00000020932/ENSMUSG00000026923/ENSMUSG00000026728/ENSMUSG00000014599/ENSMUSG00000020467/ENSMUSG00000034394/ENSMUSG00000023915/ENSMUSG00000019982/ENSMUSG00000029838/ENSMUSG00000021756/ENSMUSG00000022892/ENSMUSG00000032554/ENSMUSG00000027995/ENSMUSG00000068748/ENSMUSG00000040663/ENSMUSG00000022425/ENSMUSG00000042228/ENSMUSG00000015599/ENSMUSG00000040136/ENSMUSG00000030541/ENSMUSG00000036353/…	Gfap/Notch1/Vim/Csf1/Efemp1/Lif/Tnfrsf21/Myb/Ptn/Il6st/App/Trf/Tlr2/Ptprz1/Clcf1/Enpp2/Lyn/Ttbk1/Abcc8/Idh2/P2ry12/Bmp4/Tspo/Prkch/Lingo1/Id4/2900011O08Rik/Serpine2/Dab1	29
BP	GO:0048002	antigen processing and presentation of peptide antigen	16|1439	47|16518	1.12435e-06	2.72293e-05	ENSMUSG00000035929/ENSMUSG00000061232/ENSMUSG00000060802/ENSMUSG00000038642/ENSMUSG00000073411/ENSMUSG00000067212/ENSMUSG00000023992/ENSMUSG00000037321/ENSMUSG00000026177/ENSMUSG00000016206/ENSMUSG00000073409/ENSMUSG00000026471/ENSMUSG00000073421/ENSMUSG00000060550/ENSMUSG00000058715/ENSMUSG00000056116	H2-Q4/H2-K1/B2m/Ctss/H2-D1/H2-T23/Trem2/Tap1/Slc11a1/H2-M3/H2-Q6/Mr1/H2-Ab1/H2-Q7/Fcer1g/H2-T22	16
CC	GO:0009925	basal plasma membrane	15|1463	43|16707	1.82113e-06	2.75446e-05	ENSMUSG00000007655/ENSMUSG00000030737/ENSMUSG00000020122/ENSMUSG00000034462/ENSMUSG00000032554/ENSMUSG00000022469/ENSMUSG00000028631/ENSMUSG00000057182/ENSMUSG00000062312/ENSMUSG00000044217/ENSMUSG00000036353/ENSMUSG00000016494/ENSMUSG00000017774/ENSMUSG00000039115/ENSMUSG00000027111	Cav1/Slco2b1/Egfr/Pkd2/Trf/Rapgef3/Kcnq4/Scn3a/Erbb2/Aqp5/P2ry12/Cd34/Myo1c/Itga9/Itga6	15
MF	GO:0005216	ion channel activity	63|1421	379|16303	4.23199e-07	2.85357e-05	ENSMUSG00000035200/ENSMUSG00000045246/ENSMUSG00000034810/ENSMUSG00000052387/ENSMUSG00000018862/ENSMUSG00000028255/ENSMUSG00000034714/ENSMUSG00000007041/ENSMUSG00000001985/ENSMUSG00000074991/ENSMUSG00000025892/ENSMUSG00000015968/ENSMUSG00000031075/ENSMUSG00000031517/ENSMUSG00000034462/ENSMUSG00000010066/ENSMUSG00000064210/ENSMUSG00000054720/ENSMUSG00000056073/ENSMUSG00000027087/ENSMUSG00000028631/…	Chrnb4/Kcng4/Scn7a/Trpm3/Otop3/Clca1/Ttyh2/Clic1/Grik3/Gabrr3/Gria4/Cacna1d/Ano1/Gpm6a/Pkd2/Cacna2d2/Ano6/Lrrc8c/Grik2/Itgav/Kcnq4/Cacnb3/Kcnq2/P2rx7/Kcnip1/Gria1/Anxa2/Kcne1l/Cacna1b/Itpr3/Scn3a/Gria3/Kcna5/Grik1/Slc1a4/Cacna1a/Jph1/Cacnb4/Tpcn2/Slc26a7/Htr3a/Anxa6/Kcnt1/Cacna1g/Abcc8/Kcnk9/Gabra1/Scnn1a/Gabrg2/Scn1a/Itpr1/Scn8a/Kcnk1/Ttyh3/Cnga3/Tpcn1/Trpm1/Scn3b/Trpm4/Slc24a2/Kcnk3/Bsnd/Gabrb3	63
MF	GO:0043236	laminin binding	13|1421	30|16303	4.62565e-07	2.91107e-05	ENSMUSG00000038642/ENSMUSG00000001507/ENSMUSG00000041936/ENSMUSG00000050335/ENSMUSG00000039116/ENSMUSG00000040152/ENSMUSG00000068220/ENSMUSG00000025809/ENSMUSG00000023328/ENSMUSG00000039115/ENSMUSG00000031558/ENSMUSG00000027111/ENSMUSG00000002980	Ctss/Itga3/Agrn/Lgals3/Adgrg6/Thbs1/Lgals1/Itgb1/Ache/Itga9/Slit2/Itga6/Bcam	13
BP	GO:0090287	regulation of cellular response to growth factor stimulus	45|1439	245|16518	1.21511e-06	2.92542e-05	ENSMUSG00000037225/ENSMUSG00000026923/ENSMUSG00000048612/ENSMUSG00000031565/ENSMUSG00000007655/ENSMUSG00000016918/ENSMUSG00000001507/ENSMUSG00000025351/ENSMUSG00000070509/ENSMUSG00000050069/ENSMUSG00000028195/ENSMUSG00000031283/ENSMUSG00000044674/ENSMUSG00000041120/ENSMUSG00000006800/ENSMUSG00000037211/ENSMUSG00000031486/ENSMUSG00000027204/ENSMUSG00000001827/ENSMUSG00000014773/ENSMUSG00000028249/…	Fgf2/Notch1/Myof/Fgfr1/Cav1/Sulf1/Itga3/Cd63/Rgma/Grem2/Cyr61/Chrdl1/Fzd1/Nbl1/Sulf2/Spry1/Adgra2/Fbn1/Folr1/Dll1/Sdcbp/Wnt5a/Prkcb/Nrep/Ptpn1/Thbs1/Smad3/Tgfbr3/Rbpms2/Htra3/Ptprf/Sema6a/Sfrp1/Pmepa1/Bcl9l/Dab2ip/Tcf4/Bmp4/Onecut2/Myo1c/Vsir/Cav2/Slc9a6/Slit2/Emilin1	45
BP	GO:0002821	positive regulation of adaptive immune response	27|1439	114|16518	1.2187e-06	2.92542e-05	ENSMUSG00000035929/ENSMUSG00000061232/ENSMUSG00000060802/ENSMUSG00000073411/ENSMUSG00000020641/ENSMUSG00000026072/ENSMUSG00000067212/ENSMUSG00000024659/ENSMUSG00000018899/ENSMUSG00000026395/ENSMUSG00000026177/ENSMUSG00000002147/ENSMUSG00000016206/ENSMUSG00000073409/ENSMUSG00000040511/ENSMUSG00000040663/ENSMUSG00000029468/ENSMUSG00000016496/ENSMUSG00000047139/ENSMUSG00000024164/ENSMUSG00000073421/…	H2-Q4/H2-K1/B2m/H2-D1/Rsad2/Il1r1/H2-T23/Anxa1/Irf1/Ptprc/Slc11a1/Stat6/H2-M3/H2-Q6/Pvr/Clcf1/P2rx7/Cd274/Cd24a/C3/H2-Ab1/H2-Q7/Fcer1g/H2-T22/Fam49b/Arid5a/Prkcq	27
BP	GO:0002699	positive regulation of immune effector process	40|1439	207|16518	1.25289e-06	2.99431e-05	ENSMUSG00000035929/ENSMUSG00000061232/ENSMUSG00000037921/ENSMUSG00000060802/ENSMUSG00000073411/ENSMUSG00000020641/ENSMUSG00000026072/ENSMUSG00000040296/ENSMUSG00000067212/ENSMUSG00000029826/ENSMUSG00000024810/ENSMUSG00000019982/ENSMUSG00000024659/ENSMUSG00000018899/ENSMUSG00000026395/ENSMUSG00000027718/ENSMUSG00000021994/ENSMUSG00000030124/ENSMUSG00000002147/ENSMUSG00000016206/ENSMUSG00000073409/…	H2-Q4/H2-K1/Ddx60/B2m/H2-D1/Rsad2/Il1r1/Ddx58/H2-T23/Zc3hav1/Il33/Myb/Anxa1/Irf1/Ptprc/Il21/Wnt5a/Lag3/Stat6/H2-M3/H2-Q6/Tlr4/Pvr/Clcf1/Gprc5b/P2rx7/Ccl2/Cd24a/C3/Lyn/H2-Q7/Stat5b/Fcer1g/H2-T22/Vav1/Fam49b/Dhx58/Stat5a/Arid5a/Hmox1	40
BP	GO:1901343	negative regulation of vasculature development	28|1439	121|16518	1.28265e-06	3.05204e-05	ENSMUSG00000026923/ENSMUSG00000022893/ENSMUSG00000021701/ENSMUSG00000016918/ENSMUSG00000030671/ENSMUSG00000052336/ENSMUSG00000034394/ENSMUSG00000018593/ENSMUSG00000029838/ENSMUSG00000034855/ENSMUSG00000026104/ENSMUSG00000033170/ENSMUSG00000023885/ENSMUSG00000063531/ENSMUSG00000039239/ENSMUSG00000020580/ENSMUSG00000035385/ENSMUSG00000040152/ENSMUSG00000030022/ENSMUSG00000006445/ENSMUSG00000019647/…	Notch1/Adamts1/Plk2/Sulf1/Pde3b/Cx3cr1/Lif/Sparc/Ptn/Cxcl10/Stat1/Card10/Thbs2/Sema3e/Tgfb2/Rock2/Ccl2/Thbs1/Adamts9/Epha2/Sema6a/Abcc8/Dab2ip/Tcf4/Bmp4/Emilin1/Adgrb1/Col4a2	28
BP	GO:0001910	regulation of leukocyte mediated cytotoxicity	21|1439	76|16518	1.29253e-06	3.06216e-05	ENSMUSG00000035929/ENSMUSG00000061232/ENSMUSG00000060802/ENSMUSG00000073411/ENSMUSG00000067212/ENSMUSG00000026395/ENSMUSG00000027718/ENSMUSG00000037321/ENSMUSG00000030124/ENSMUSG00000001123/ENSMUSG00000016206/ENSMUSG00000073409/ENSMUSG00000040511/ENSMUSG00000029468/ENSMUSG00000035385/ENSMUSG00000060550/ENSMUSG00000020919/ENSMUSG00000056116/ENSMUSG00000034116/ENSMUSG00000022378/ENSMUSG00000004043	H2-Q4/H2-K1/B2m/H2-D1/H2-T23/Ptprc/Il21/Tap1/Lag3/Lgals9/H2-M3/H2-Q6/Pvr/P2rx7/Ccl2/H2-Q7/Stat5b/H2-T22/Vav1/Fam49b/Stat5a	21
BP	GO:0030324	lung development	37|1439	185|16518	1.31675e-06	3.10604e-05	ENSMUSG00000037225/ENSMUSG00000028635/ENSMUSG00000026923/ENSMUSG00000028583/ENSMUSG00000064246/ENSMUSG00000031565/ENSMUSG00000019997/ENSMUSG00000034394/ENSMUSG00000000957/ENSMUSG00000001507/ENSMUSG00000029231/ENSMUSG00000018593/ENSMUSG00000032359/ENSMUSG00000034957/ENSMUSG00000029838/ENSMUSG00000025921/ENSMUSG00000026185/ENSMUSG00000015647/ENSMUSG00000037211/ENSMUSG00000020122/ENSMUSG00000000567/…	Fgf2/Edn2/Notch1/Pdpn/Chil1/Fgfr1/Ctgf/Lif/Mmp14/Itga3/Pdgfra/Sparc/Ctsh/Cebpa/Ptn/Rdh10/Igfbp5/Lama5/Spry1/Egfr/Sox9/Pdgfrb/Ptk7/Lipa/Wnt5a/Nfib/Hmgb1/Tgfbr2/Thra/Foxp4/Yap1/Bmp4/Vangl2/Lama1/Timeless/Selenon/Ctsz	37
BP	GO:0001101	response to acid chemical	55|1439	326|16518	1.40029e-06	3.28888e-05	ENSMUSG00000031502/ENSMUSG00000024827/ENSMUSG00000019997/ENSMUSG00000051855/ENSMUSG00000062960/ENSMUSG00000029231/ENSMUSG00000006435/ENSMUSG00000018593/ENSMUSG00000019982/ENSMUSG00000032359/ENSMUSG00000030342/ENSMUSG00000029838/ENSMUSG00000028036/ENSMUSG00000026509/ENSMUSG00000030662/ENSMUSG00000031273/ENSMUSG00000020122/ENSMUSG00000034462/ENSMUSG00000000567/ENSMUSG00000015243/ENSMUSG00000001827/…	Col4a1/Gldc/Ctgf/Mest/Kdr/Pdgfra/Neurl1a/Sparc/Myb/Ctsh/Cd9/Ptn/Ptgfr/Capn2/Ipo5/Col4a6/Egfr/Pkd2/Sox9/Abca1/Folr1/Ucp2/Pdgfrb/Ass1/Tlr2/Cyp26a1/Ptk7/Hsd17b2/Fyn/Ntrk2/Tlr4/Gclm/Slc1a3/Ccl2/Dnmt3b/Cyba/Tead2/Cebpb/Tgfbr3/Asns/Gsn/Yap1/Lyn/Sfrp1/Gstt1/Fgfr2/Gdap1/Col1a2/Sh3bp4/Tbxas1/Ptgs2/Abcg2/Nat1/Brinp3/Nfatc4	55
BP	GO:0070588	calcium ion transmembrane transport	49|1439	278|16518	1.44791e-06	3.38613e-05	ENSMUSG00000037225/ENSMUSG00000034855/ENSMUSG00000044080/ENSMUSG00000027712/ENSMUSG00000017400/ENSMUSG00000015968/ENSMUSG00000031517/ENSMUSG00000034462/ENSMUSG00000003161/ENSMUSG00000010066/ENSMUSG00000064210/ENSMUSG00000022469/ENSMUSG00000027087/ENSMUSG00000026395/ENSMUSG00000003352/ENSMUSG00000028207/ENSMUSG00000019843/ENSMUSG00000039239/ENSMUSG00000069833/ENSMUSG00000029468/ENSMUSG00000032231/…	Fgf2/Cxcl10/S100a1/Anxa5/Stac2/Cacna1d/Gpm6a/Pkd2/Sri/Cacna2d2/Ano6/Rapgef3/Itgav/Ptprc/Cacnb3/Asph/Fyn/Tgfb2/Ahnak/P2rx7/Anxa2/Cacna1b/Itpr3/Cyba/Plcg1/Cacna1a/Jph1/Cacnb4/Tpcn2/Lyn/Gem/Anxa6/Ptpn6/Capn3/Cx3cl1/Cacna1g/Ccr5/P2ry12/Bmp4/Itpr1/Pik3cg/Tpcn1/Trpm1/Slc8b1/Trpm4/Slc24a2/Selenon/Nos1ap/Pde4b	49
BP	GO:0010811	positive regulation of cell-substrate adhesion	27|1439	115|16518	1.46222e-06	3.40496e-05	ENSMUSG00000014599/ENSMUSG00000031328/ENSMUSG00000001507/ENSMUSG00000062960/ENSMUSG00000029838/ENSMUSG00000028195/ENSMUSG00000031841/ENSMUSG00000058325/ENSMUSG00000041959/ENSMUSG00000035258/ENSMUSG00000025314/ENSMUSG00000024076/ENSMUSG00000040274/ENSMUSG00000032402/ENSMUSG00000068566/ENSMUSG00000022425/ENSMUSG00000026193/ENSMUSG00000025809/ENSMUSG00000022099/ENSMUSG00000074715/ENSMUSG00000034164/…	Csf1/Flna/Itga3/Kdr/Ptn/Cyr61/Cdh13/Dock1/S100a10/Abi3bp/Ptprj/Vit/Cdk6/Smad3/Myadm/Enpp2/Fn1/Itgb1/Dmtn/Ccl28/Emid1/Jup/Itga6/Emilin1/Ndnf/Dbn1/Rsu1	27
BP	GO:0051480	regulation of cytosolic calcium ion concentration	56|1439	335|16518	1.51702e-06	3.51754e-05	ENSMUSG00000037225/ENSMUSG00000028635/ENSMUSG00000007655/ENSMUSG00000052336/ENSMUSG00000037820/ENSMUSG00000029231/ENSMUSG00000030669/ENSMUSG00000034855/ENSMUSG00000028036/ENSMUSG00000052920/ENSMUSG00000021756/ENSMUSG00000021057/ENSMUSG00000034462/ENSMUSG00000003161/ENSMUSG00000027087/ENSMUSG00000026395/ENSMUSG00000003352/ENSMUSG00000021994/ENSMUSG00000028207/ENSMUSG00000019843/ENSMUSG00000039239/…	Fgf2/Edn2/Cav1/Cx3cr1/Tgm2/Pdgfra/Calca/Cxcl10/Ptgfr/Prkg1/Il6st/Akap5/Pkd2/Sri/Itgav/Ptprc/Cacnb3/Wnt5a/Asph/Fyn/Tgfb2/Hmgb1/P2rx7/Oxtr/Gria1/Anxa2/Itpr3/Cyba/Smad3/Cd24a/Plcg1/Kcna5/Cacna1a/Jph1/Tpcn2/Lyn/Plcd1/Ptpn6/Capn3/Cx3cl1/Cacna1g/Ccr5/Ccl28/Adora1/Bmp4/Gpr157/Cib2/Itpr1/Pth1r/Pik3cg/Tpcn1/Trpm1/Slc8b1/Trpm4/Kcnk3/Selenon	56
CC	GO:0044309	neuron spine	38|1463	196|16707	2.39037e-06	3.52726e-05	ENSMUSG00000061718/ENSMUSG00000020388/ENSMUSG00000053931/ENSMUSG00000043079/ENSMUSG00000006435/ENSMUSG00000021057/ENSMUSG00000022892/ENSMUSG00000032060/ENSMUSG00000025892/ENSMUSG00000031517/ENSMUSG00000003161/ENSMUSG00000025555/ENSMUSG00000055254/ENSMUSG00000068748/ENSMUSG00000035863/ENSMUSG00000053550/ENSMUSG00000005360/ENSMUSG00000020524/ENSMUSG00000017314/ENSMUSG00000001986/ENSMUSG00000028943/…	Ppp1r1b/Pdlim4/Cnn3/Synpo/Neurl1a/Akap5/App/Cryab/Gria4/Gpm6a/Sri/Farp1/Ntrk2/Ptprz1/Palm/Shisa7/Slc1a3/Gria1/Mpp2/Gria3/Espn/Grk3/Dlgap3/Shisa6/Sez6/Itgb1/Comt/Adora1/Rapgef4/Slc9a6/Camk2a/Shisa8/Arc/Dbn1/Adgrb1/Syt11/Ophn1/Pde4b	38
BP	GO:0070665	positive regulation of leukocyte proliferation	28|1439	122|16518	1.5283e-06	3.52868e-05	ENSMUSG00000022508/ENSMUSG00000027962/ENSMUSG00000014599/ENSMUSG00000067212/ENSMUSG00000024659/ENSMUSG00000021756/ENSMUSG00000024397/ENSMUSG00000026395/ENSMUSG00000027718/ENSMUSG00000039005/ENSMUSG00000040663/ENSMUSG00000066551/ENSMUSG00000032440/ENSMUSG00000016496/ENSMUSG00000022488/ENSMUSG00000052142/ENSMUSG00000047139/ENSMUSG00000047810/ENSMUSG00000042228/ENSMUSG00000032508/ENSMUSG00000035914/…	Bcl6/Vcam1/Csf1/H2-T23/Anxa1/Il6st/Aif1/Ptprc/Il21/Tlr4/Clcf1/Hmgb1/Tgfbr2/Cd274/Nckap1l/Rasal3/Cd24a/Ccdc88b/Lyn/Myd88/Cd276/Stat5b/Efnb1/Kitl/Cdkn1a/Stat5a/Prkcq/Cd86	28
CC	GO:0005884	actin filament	25|1463	104|16707	2.46223e-06	3.54678e-05	ENSMUSG00000020388/ENSMUSG00000049493/ENSMUSG00000031328/ENSMUSG00000024659/ENSMUSG00000034462/ENSMUSG00000021676/ENSMUSG00000024397/ENSMUSG00000024143/ENSMUSG00000019843/ENSMUSG00000058056/ENSMUSG00000021998/ENSMUSG00000036402/ENSMUSG00000027940/ENSMUSG00000028943/ENSMUSG00000001864/ENSMUSG00000052397/ENSMUSG00000016382/ENSMUSG00000020173/ENSMUSG00000022099/ENSMUSG00000031799/ENSMUSG00000017774/…	Pdlim4/Pls1/Flna/Anxa1/Pkd2/Iqgap2/Aif1/Rhoq/Fyn/Palld/Lcp1/Gng12/Tpm3/Espn/Aif1l/Ezr/Pls3/Cobl/Dmtn/Tpm4/Myo1c/Dbn1/Hck/Gdpd2/Specc1	25
BP	GO:0051048	negative regulation of secretion	42|1439	224|16518	1.56694e-06	3.60263e-05	ENSMUSG00000028635/ENSMUSG00000026923/ENSMUSG00000030341/ENSMUSG00000020641/ENSMUSG00000028599/ENSMUSG00000034394/ENSMUSG00000023915/ENSMUSG00000024810/ENSMUSG00000024659/ENSMUSG00000032562/ENSMUSG00000052920/ENSMUSG00000027712/ENSMUSG00000055980/ENSMUSG00000033685/ENSMUSG00000026074/ENSMUSG00000021071/ENSMUSG00000001123/ENSMUSG00000049112/ENSMUSG00000038453/ENSMUSG00000047250/ENSMUSG00000052397/…	Edn2/Notch1/Tnfrsf1a/Rsad2/Tnfrsf1b/Lif/Tnfrsf21/Il33/Anxa1/Gnai2/Prkg1/Anxa5/Irs1/Ucp2/Map4k4/Trim9/Lgals9/Oxtr/Srcin1/Ptgs1/Ezr/Rhbdf1/Sfrp1/Abat/Cx3cl1/Fn1/Abcc8/Idh2/Comt/Entpd1/P2ry12/Adora1/Abr/Pde1c/Cd34/Vsnl1/Anxa4/Midn/Crhbp/Spx/Hmox1/Syt11	42
BP	GO:0002695	negative regulation of leukocyte activation	32|1439	150|16518	1.5739e-06	3.60343e-05	ENSMUSG00000022508/ENSMUSG00000002602/ENSMUSG00000023915/ENSMUSG00000024659/ENSMUSG00000018899/ENSMUSG00000053965/ENSMUSG00000024778/ENSMUSG00000030124/ENSMUSG00000001123/ENSMUSG00000016206/ENSMUSG00000066551/ENSMUSG00000014361/ENSMUSG00000016496/ENSMUSG00000056501/ENSMUSG00000047139/ENSMUSG00000073421/ENSMUSG00000042228/ENSMUSG00000062312/ENSMUSG00000031548/ENSMUSG00000004266/ENSMUSG00000031778/…	Bcl6/Axl/Tnfrsf21/Anxa1/Irf1/Pde5a/Fas/Lag3/Lgals9/H2-M3/Hmgb1/Mertk/Cd274/Cebpb/Cd24a/H2-Ab1/Lyn/Erbb2/Sfrp1/Ptpn6/Cx3cl1/Cd276/Bmp4/Abr/Prkar1a/Nrarp/Vsir/Pag1/Zfp608/Ripor2/Hmox1/Cd86	32
BP	GO:0002040	sprouting angiogenesis	26|1439	109|16518	1.6538e-06	3.75482e-05	ENSMUSG00000037225/ENSMUSG00000026923/ENSMUSG00000021701/ENSMUSG00000062960/ENSMUSG00000046768/ENSMUSG00000024659/ENSMUSG00000044080/ENSMUSG00000031841/ENSMUSG00000031486/ENSMUSG00000033170/ENSMUSG00000070327/ENSMUSG00000022475/ENSMUSG00000014773/ENSMUSG00000063531/ENSMUSG00000066551/ENSMUSG00000040152/ENSMUSG00000030022/ENSMUSG00000006445/ENSMUSG00000019647/ENSMUSG00000025809/ENSMUSG00000021835/…	Fgf2/Notch1/Plk2/Kdr/Rhoj/Anxa1/S100a1/Cdh13/Adgra2/Card10/Rnf213/Hdac7/Dll1/Sema3e/Hmgb1/Thbs1/Adamts9/Epha2/Sema6a/Itgb1/Bmp4/Nrarp/Ptgs2/Efnb2/Slit2/Hmox1	26
BP	GO:0002708	positive regulation of lymphocyte mediated immunity	26|1439	109|16518	1.6538e-06	3.75482e-05	ENSMUSG00000035929/ENSMUSG00000061232/ENSMUSG00000060802/ENSMUSG00000073411/ENSMUSG00000020641/ENSMUSG00000026072/ENSMUSG00000067212/ENSMUSG00000026395/ENSMUSG00000027718/ENSMUSG00000030124/ENSMUSG00000002147/ENSMUSG00000016206/ENSMUSG00000073409/ENSMUSG00000040511/ENSMUSG00000040663/ENSMUSG00000029468/ENSMUSG00000047139/ENSMUSG00000024164/ENSMUSG00000060550/ENSMUSG00000020919/ENSMUSG00000058715/…	H2-Q4/H2-K1/B2m/H2-D1/Rsad2/Il1r1/H2-T23/Ptprc/Il21/Lag3/Stat6/H2-M3/H2-Q6/Pvr/Clcf1/P2rx7/Cd24a/C3/H2-Q7/Stat5b/Fcer1g/H2-T22/Vav1/Fam49b/Stat5a/Arid5a	26
CC	GO:0032432	actin filament bundle	21|1463	79|16707	2.79155e-06	3.92764e-05	ENSMUSG00000020388/ENSMUSG00000037736/ENSMUSG00000049493/ENSMUSG00000031328/ENSMUSG00000043079/ENSMUSG00000032060/ENSMUSG00000004665/ENSMUSG00000058056/ENSMUSG00000021998/ENSMUSG00000029860/ENSMUSG00000027940/ENSMUSG00000006519/ENSMUSG00000034201/ENSMUSG00000032735/ENSMUSG00000016382/ENSMUSG00000059248/ENSMUSG00000072214/ENSMUSG00000031799/ENSMUSG00000026556/ENSMUSG00000006219/ENSMUSG00000025278	Pdlim4/Limch1/Pls1/Flna/Synpo/Cryab/Cnn2/Palld/Lcp1/Zyx/Tpm3/Cyba/Gas2l1/Ablim3/Pls3/Sept9/Sept5/Tpm4/Vangl2/Fblim1/Flnb	21
BP	GO:0010977	negative regulation of neuron projection development	33|1439	158|16518	1.78886e-06	4.04462e-05	ENSMUSG00000020932/ENSMUSG00000061232/ENSMUSG00000060802/ENSMUSG00000073411/ENSMUSG00000026728/ENSMUSG00000021701/ENSMUSG00000020467/ENSMUSG00000031328/ENSMUSG00000002985/ENSMUSG00000070509/ENSMUSG00000050271/ENSMUSG00000069171/ENSMUSG00000026074/ENSMUSG00000063531/ENSMUSG00000021994/ENSMUSG00000068748/ENSMUSG00000042105/ENSMUSG00000027954/ENSMUSG00000068220/ENSMUSG00000019647/ENSMUSG00000040249/…	Gfap/H2-K1/B2m/H2-D1/Vim/Plk2/Efemp1/Flna/Apoe/Rgma/Prag1/Nr2f1/Map4k4/Sema3e/Wnt5a/Ptprz1/Inpp5f/Efna1/Lgals1/Sema6a/Lrp1/Stmn2/Trim46/Ccr5/Rtn4rl2/Rtn4rl1/Sema4g/Efnb2/Slit2/Dab1/Nfatc4/Inppl1/Ctsz	33
BP	GO:0001837	epithelial to mesenchymal transition	28|1439	123|16518	1.81661e-06	4.09036e-05	ENSMUSG00000026923/ENSMUSG00000028583/ENSMUSG00000031328/ENSMUSG00000048537/ENSMUSG00000027803/ENSMUSG00000019789/ENSMUSG00000037211/ENSMUSG00000028480/ENSMUSG00000000567/ENSMUSG00000026833/ENSMUSG00000028249/ENSMUSG00000021994/ENSMUSG00000039239/ENSMUSG00000026836/ENSMUSG00000032440/ENSMUSG00000042258/ENSMUSG00000027954/ENSMUSG00000032402/ENSMUSG00000029287/ENSMUSG00000078794/ENSMUSG00000038545/…	Notch1/Pdpn/Flna/Phldb1/Wwtr1/Hey2/Spry1/Glipr2/Sox9/Olfm1/Sdcbp/Wnt5a/Tgfb2/Acvr1/Tgfbr2/Isl1/Efna1/Smad3/Tgfbr3/Dact3/Cul7/Sfrp1/Bcl9l/Dab2ip/Bmp4/Fgfr2/Vangl2/Gcnt2	28
BP	GO:0010594	regulation of endothelial cell migration	32|1439	151|16518	1.833e-06	4.09346e-05	ENSMUSG00000037225/ENSMUSG00000026923/ENSMUSG00000031565/ENSMUSG00000021701/ENSMUSG00000002985/ENSMUSG00000028517/ENSMUSG00000062960/ENSMUSG00000046768/ENSMUSG00000018593/ENSMUSG00000024659/ENSMUSG00000031486/ENSMUSG00000033170/ENSMUSG00000022475/ENSMUSG00000021994/ENSMUSG00000066551/ENSMUSG00000020580/ENSMUSG00000015305/ENSMUSG00000027954/ENSMUSG00000040152/ENSMUSG00000016933/ENSMUSG00000030022/…	Fgf2/Notch1/Fgfr1/Plk2/Apoe/Plpp3/Kdr/Rhoj/Sparc/Anxa1/Adgra2/Card10/Hdac7/Wnt5a/Hmgb1/Rock2/Sash1/Efna1/Thbs1/Plcg1/Adamts9/Epha2/Dab2ip/Bmp4/Ptgs2/Sp100/Jup/Slit2/Adgrb1/Stat5a/Hmox1/Amotl1	32
BP	GO:0048754	branching morphogenesis of an epithelial tube	32|1439	151|16518	1.833e-06	4.09346e-05	ENSMUSG00000037225/ENSMUSG00000026923/ENSMUSG00000031502/ENSMUSG00000003534/ENSMUSG00000030123/ENSMUSG00000014599/ENSMUSG00000000957/ENSMUSG00000029231/ENSMUSG00000032359/ENSMUSG00000025921/ENSMUSG00000015647/ENSMUSG00000037211/ENSMUSG00000034462/ENSMUSG00000000567/ENSMUSG00000001761/ENSMUSG00000051159/ENSMUSG00000063531/ENSMUSG00000021994/ENSMUSG00000026836/ENSMUSG00000032440/ENSMUSG00000053110/…	Fgf2/Notch1/Col4a1/Ddr1/Plxnd1/Csf1/Mmp14/Pdgfra/Ctsh/Rdh10/Lama5/Spry1/Pkd2/Sox9/Smo/Cited1/Sema3e/Wnt5a/Acvr1/Tgfbr2/Yap1/Epha2/Bmp4/Fat4/Vangl2/Nrarp/Lama1/Slit2/Timeless/Nfatc4/Lrp5/Ctsz	32
BP	GO:0044057	regulation of system process	73|1439	481|16518	1.86993e-06	4.1409e-05	ENSMUSG00000028635/ENSMUSG00000026414/ENSMUSG00000026923/ENSMUSG00000030341/ENSMUSG00000037405/ENSMUSG00000038642/ENSMUSG00000035200/ENSMUSG00000031565/ENSMUSG00000007655/ENSMUSG00000019997/ENSMUSG00000024935/ENSMUSG00000031328/ENSMUSG00000028599/ENSMUSG00000034394/ENSMUSG00000023915/ENSMUSG00000030669/ENSMUSG00000026185/ENSMUSG00000032562/ENSMUSG00000019789/ENSMUSG00000033161/ENSMUSG00000064179/…	Edn2/Tnnt2/Notch1/Tnfrsf1a/Icam1/Ctss/Chrnb4/Fgfr1/Cav1/Ctgf/Slc1a1/Flna/Tnfrsf1b/Lif/Tnfrsf21/Calca/Igfbp5/Gnai2/Hey2/Atp1a1/Tnnt1/S100a1/Prkg1/Cacna1d/Egfr/Trf/Sri/Cacna2d2/Agrn/Aif1/Pde5a/Arhgap42/Sptbn4/Cacnb3/Tgfb2/Tlr4/Tmem65/Mgll/Lmna/Oxtr/Dmpk/Kcne1l/Cacna1b/Thra/Cyba/Smad3/Kcna5/Ptgs1/Anxa6/Abat/Cx3cl1/Cacna1g/Abcc8/Comt/Adora1/Rgs4/Rapgef4/Tbxas1/S100b/Ptgs2/Abcg2/Jup/Crhbp/Dbn1/Rab8b/C…	73
BP	GO:1902532	negative regulation of intracellular signal transduction	73|1439	481|16518	1.86993e-06	4.1409e-05	ENSMUSG00000053175/ENSMUSG00000053113/ENSMUSG00000022037/ENSMUSG00000005087/ENSMUSG00000020227/ENSMUSG00000007655/ENSMUSG00000020044/ENSMUSG00000022508/ENSMUSG00000034394/ENSMUSG00000002985/ENSMUSG00000001507/ENSMUSG00000017466/ENSMUSG00000034422/ENSMUSG00000032562/ENSMUSG00000018899/ENSMUSG00000026104/ENSMUSG00000026628/ENSMUSG00000037211/ENSMUSG00000034462/ENSMUSG00000003161/ENSMUSG00000022475/…	Bcl3/Socs3/Clu/Cd44/Irak3/Cav1/Timp3/Bcl6/Lif/Apoe/Itga3/Timp2/Parp14/Gnai2/Irf1/Stat1/Atf3/Spry1/Pkd2/Sri/Hdac7/Dgkz/Ptprc/Arhgap42/Tgfb2/Tlr4/Ptprj/Mapk8ip1/P2rx7/Wwc1/Inpp5f/Efna1/Ptpn1/Thbs1/Rasal3/Rasa4/Dusp6/Ptprd/Myadm/Rasa2/Ezr/Cgnl1/Lyn/Epha2/Ajuba/Sema6a/Sfrp1/Ptpn6/Rnf152/Itgb1/Plekha1/Dab2ip/Aplp1/Limd1/Cdc42se1/Bmp4/Socs2/Sh3bp4/Tle1/Itpr1/Ptgs2/Slit2/Dhx58/Emilin1/Ripor2/Rassf2/Phld…	73
BP	GO:0045860	positive regulation of protein kinase activity	68|1439	438|16518	1.87705e-06	4.1409e-05	ENSMUSG00000037225/ENSMUSG00000015312/ENSMUSG00000022037/ENSMUSG00000064246/ENSMUSG00000031565/ENSMUSG00000024079/ENSMUSG00000014599/ENSMUSG00000069874/ENSMUSG00000044716/ENSMUSG00000026674/ENSMUSG00000041498/ENSMUSG00000006435/ENSMUSG00000024998/ENSMUSG00000030669/ENSMUSG00000024621/ENSMUSG00000028195/ENSMUSG00000055737/ENSMUSG00000020122/ENSMUSG00000033170/ENSMUSG00000034462/ENSMUSG00000032554/…	Fgf2/Gadd45b/Clu/Chil1/Fgfr1/Eif2ak2/Csf1/Irgm2/Dok7/Ddr2/Kif14/Neurl1a/Plce1/Calca/Csf1r/Cyr61/Ghr/Egfr/Card10/Pkd2/Trf/Agrn/Gab1/Ptprc/Pde5a/Ccnd2/Slc11a1/Wnt5a/Lgals9/Tgfb2/Tlr4/Ror2/Hmgb1/Gprc5b/P2rx7/Tgfbr2/Sash1/Efna1/Arhgef5/Srcin1/Lrp8/Ptpn1/Thbs1/Nckap1l/Cd24a/Mdfic/Erbb2/Ajuba/Irak1/Ttbk1/Dab2ip/Adora1/Bmp4/Camk1/Kitl/Map3k8/Vangl2/Map3k5/Nek6/Npm1/Cdkn1a/Tirap/Ang/Map3k9/Pik3cg/Rassf2/…	68
BP	GO:0048839	inner ear development	36|1439	181|16518	2.08762e-06	4.56846e-05	ENSMUSG00000071637/ENSMUSG00000026923/ENSMUSG00000061232/ENSMUSG00000031565/ENSMUSG00000036905/ENSMUSG00000043850/ENSMUSG00000067212/ENSMUSG00000018593/ENSMUSG00000034957/ENSMUSG00000002799/ENSMUSG00000019789/ENSMUSG00000022483/ENSMUSG00000000567/ENSMUSG00000014773/ENSMUSG00000020140/ENSMUSG00000024620/ENSMUSG00000023972/ENSMUSG00000005917/ENSMUSG00000028631/ENSMUSG00000021994/ENSMUSG00000039239/…	Cebpd/Notch1/H2-K1/Fgfr1/C1qb/Clrn1/H2-T23/Sparc/Cebpa/Jag2/Hey2/Col2a1/Sox9/Dll1/Lgr5/Pdgfrb/Ptk7/Otx1/Kcnq4/Wnt5a/Tgfb2/Ror2/Frzb/Maf/Bmp4/Abr/Fat4/Zic1/Lrig1/Vangl2/Ripor2/Col11a1/Fzd6/Kcnk3/Sox2/Gabrb3	36
BP	GO:0051216	cartilage development	36|1439	181|16518	2.08762e-06	4.56846e-05	ENSMUSG00000037225/ENSMUSG00000005087/ENSMUSG00000031565/ENSMUSG00000019997/ENSMUSG00000016918/ENSMUSG00000022098/ENSMUSG00000020467/ENSMUSG00000025321/ENSMUSG00000028195/ENSMUSG00000022483/ENSMUSG00000006800/ENSMUSG00000055737/ENSMUSG00000000567/ENSMUSG00000001131/ENSMUSG00000070436/ENSMUSG00000022324/ENSMUSG00000021994/ENSMUSG00000039239/ENSMUSG00000008575/ENSMUSG00000021464/ENSMUSG00000024076/…	Fgf2/Cd44/Fgfr1/Ctgf/Sulf1/Bmp1/Efemp1/Itgb8/Cyr61/Col2a1/Sulf2/Ghr/Sox9/Timp1/Serpinh1/Matn2/Wnt5a/Tgfb2/Nfib/Ror2/Vit/Evc/Tgfbr2/Frzb/Anxa2/Thra/Smad3/Maf/Sox6/Anxa6/Csgalnact1/Bmp4/Coch/Pth1r/Arid5a/Col11a1	36
BP	GO:0060562	epithelial tube morphogenesis	53|1439	314|16518	2.1361e-06	4.65585e-05	ENSMUSG00000037225/ENSMUSG00000026923/ENSMUSG00000031502/ENSMUSG00000003534/ENSMUSG00000030123/ENSMUSG00000014599/ENSMUSG00000000957/ENSMUSG00000070509/ENSMUSG00000029231/ENSMUSG00000071350/ENSMUSG00000032359/ENSMUSG00000025921/ENSMUSG00000034855/ENSMUSG00000044674/ENSMUSG00000015647/ENSMUSG00000037211/ENSMUSG00000034462/ENSMUSG00000000567/ENSMUSG00000001827/ENSMUSG00000014773/ENSMUSG00000020140/…	Fgf2/Notch1/Col4a1/Ddr1/Plxnd1/Csf1/Mmp14/Rgma/Pdgfra/Setdb2/Ctsh/Rdh10/Cxcl10/Fzd1/Lama5/Spry1/Pkd2/Sox9/Folr1/Dll1/Lgr5/Smo/Cited1/Ptk7/Tulp3/Sema3e/Wnt5a/Tgfb2/Acvr1/Tgfbr2/Tead2/Smad3/Yap1/Epha2/Sfrp1/Ift57/Plxnb2/Cobl/Bmp4/Prkacb/Fat4/Vangl2/Nrarp/St14/Lama1/Efnb2/Slit2/Zeb2/Timeless/Fzd6/Nfatc4/Lrp5/Ctsz	53
BP	GO:0010634	positive regulation of epithelial cell migration	29|1439	131|16518	2.18795e-06	4.74986e-05	ENSMUSG00000037225/ENSMUSG00000031565/ENSMUSG00000021701/ENSMUSG00000028517/ENSMUSG00000001507/ENSMUSG00000062960/ENSMUSG00000046768/ENSMUSG00000018593/ENSMUSG00000032359/ENSMUSG00000024659/ENSMUSG00000031486/ENSMUSG00000058325/ENSMUSG00000028480/ENSMUSG00000022475/ENSMUSG00000000567/ENSMUSG00000021994/ENSMUSG00000039239/ENSMUSG00000066551/ENSMUSG00000032440/ENSMUSG00000020580/ENSMUSG00000015305/…	Fgf2/Fgfr1/Plk2/Plpp3/Itga3/Kdr/Rhoj/Sparc/Ctsh/Anxa1/Adgra2/Dock1/Glipr2/Hdac7/Sox9/Wnt5a/Tgfb2/Hmgb1/Tgfbr2/Rock2/Sash1/Thbs1/Plcg1/Enpp2/Bmp4/Ptgs2/Stat5a/Hmox1/Amotl1	29
BP	GO:0003015	heart process	39|1439	204|16518	2.23267e-06	4.82771e-05	ENSMUSG00000028635/ENSMUSG00000026414/ENSMUSG00000007655/ENSMUSG00000019997/ENSMUSG00000024935/ENSMUSG00000031328/ENSMUSG00000027803/ENSMUSG00000030669/ENSMUSG00000032562/ENSMUSG00000019789/ENSMUSG00000033161/ENSMUSG00000064179/ENSMUSG00000044080/ENSMUSG00000052920/ENSMUSG00000015968/ENSMUSG00000003161/ENSMUSG00000010066/ENSMUSG00000041936/ENSMUSG00000053965/ENSMUSG00000011751/ENSMUSG00000019843/…	Edn2/Tnnt2/Cav1/Ctgf/Slc1a1/Flna/Wwtr1/Calca/Gnai2/Hey2/Atp1a1/Tnnt1/S100a1/Prkg1/Cacna1d/Sri/Cacna2d2/Agrn/Pde5a/Sptbn4/Fyn/Tgfb2/Tmem65/Dmpk/Kcne1l/Cacna1b/Thra/Kcna5/Yap1/Cacna1g/Adora1/Rgs4/Scn1a/Jup/Scn3b/Spx/Trpm4/Nos1ap/Pde4b	39
BP	GO:0021782	glial cell development	23|1439	91|16518	2.24977e-06	4.84545e-05	ENSMUSG00000020932/ENSMUSG00000022037/ENSMUSG00000026728/ENSMUSG00000030342/ENSMUSG00000022892/ENSMUSG00000020122/ENSMUSG00000014773/ENSMUSG00000036560/ENSMUSG00000001761/ENSMUSG00000027995/ENSMUSG00000039116/ENSMUSG00000017167/ENSMUSG00000055254/ENSMUSG00000039005/ENSMUSG00000021464/ENSMUSG00000052911/ENSMUSG00000071176/ENSMUSG00000029070/ENSMUSG00000026879/ENSMUSG00000042228/ENSMUSG00000040249/…	Gfap/Clu/Vim/Cd9/App/Egfr/Dll1/Lgi4/Smo/Tlr2/Adgrg6/Cntnap1/Ntrk2/Tlr4/Ror2/Lamb2/Arhgef10/Mxra8/Gsn/Lyn/Lrp1/Ttbk1/Id4	23
BP	GO:1905475	regulation of protein localization to membrane	34|1439	167|16518	2.30292e-06	4.9404e-05	ENSMUSG00000049493/ENSMUSG00000000957/ENSMUSG00000001507/ENSMUSG00000029838/ENSMUSG00000021057/ENSMUSG00000017400/ENSMUSG00000031837/ENSMUSG00000020122/ENSMUSG00000023992/ENSMUSG00000050335/ENSMUSG00000024143/ENSMUSG00000003352/ENSMUSG00000019843/ENSMUSG00000053550/ENSMUSG00000035385/ENSMUSG00000032883/ENSMUSG00000052397/ENSMUSG00000026879/ENSMUSG00000006445/ENSMUSG00000062312/ENSMUSG00000040249/…	Pls1/Mmp14/Itga3/Ptn/Akap5/Stac2/Necab2/Egfr/Trem2/Lgals3/Rhoq/Cacnb3/Fyn/Shisa7/Ccl2/Acsl3/Ezr/Gsn/Epha2/Erbb2/Lrp1/Shisa6/Itgb1/Camk2b/Dmtn/Rapgef4/Gpc4/Myo1c/Clip3/Camk2a/Dbn1/Iqsec2/Camk2g/Tcaf2	34
CC	GO:0098644	complex of collagen trimers	9|1463	17|16707	3.75353e-06	5.1611e-05	ENSMUSG00000031502/ENSMUSG00000033327/ENSMUSG00000022483/ENSMUSG00000031273/ENSMUSG00000026837/ENSMUSG00000031274/ENSMUSG00000029661/ENSMUSG00000031503/ENSMUSG00000027966	Col4a1/Tnxb/Col2a1/Col4a6/Col5a1/Col4a5/Col1a2/Col4a2/Col11a1	9
BP	GO:1903829	positive regulation of cellular protein localization	50|1439	291|16518	2.43916e-06	5.21215e-05	ENSMUSG00000030341/ENSMUSG00000049493/ENSMUSG00000031328/ENSMUSG00000034394/ENSMUSG00000022906/ENSMUSG00000001507/ENSMUSG00000031207/ENSMUSG00000029838/ENSMUSG00000030662/ENSMUSG00000021057/ENSMUSG00000017400/ENSMUSG00000031837/ENSMUSG00000020122/ENSMUSG00000033170/ENSMUSG00000022469/ENSMUSG00000023992/ENSMUSG00000050335/ENSMUSG00000049502/ENSMUSG00000001761/ENSMUSG00000026589/ENSMUSG00000003352/…	Tnfrsf1a/Pls1/Flna/Lif/Parp9/Itga3/Msn/Ptn/Ipo5/Akap5/Stac2/Necab2/Egfr/Card10/Rapgef3/Trem2/Lgals3/Dtx3l/Smo/Sec16b/Cacnb3/Glis2/Asph/Fyn/Tgfb2/Bag3/Rock2/Ccl2/Acsl3/Ezr/Cacnb4/Epha2/Erbb2/Lrp1/Prr5l/Gnai1/Itgb1/Camk1/Zic1/Myo1c/Fcer1g/Tmem173/Ptgs2/Clip3/Cav2/Npm1/Jup/Prkcq/Syt11/Tcaf2	50
BP	GO:0033674	positive regulation of kinase activity	72|1439	476|16518	2.48639e-06	5.28246e-05	ENSMUSG00000037225/ENSMUSG00000015312/ENSMUSG00000022037/ENSMUSG00000064246/ENSMUSG00000031565/ENSMUSG00000024079/ENSMUSG00000014599/ENSMUSG00000069874/ENSMUSG00000044716/ENSMUSG00000026674/ENSMUSG00000029231/ENSMUSG00000041498/ENSMUSG00000006435/ENSMUSG00000024998/ENSMUSG00000030669/ENSMUSG00000024621/ENSMUSG00000028195/ENSMUSG00000055737/ENSMUSG00000020122/ENSMUSG00000033170/ENSMUSG00000034462/…	Fgf2/Gadd45b/Clu/Chil1/Fgfr1/Eif2ak2/Csf1/Irgm2/Dok7/Ddr2/Pdgfra/Kif14/Neurl1a/Plce1/Calca/Csf1r/Cyr61/Ghr/Egfr/Card10/Pkd2/Trf/Agrn/Dgkz/Gab1/Pdgfrb/Ptprc/Pde5a/Ccnd2/Slc11a1/Wnt5a/Lgals9/Tgfb2/Tlr4/Ror2/Hmgb1/Gprc5b/P2rx7/Tgfbr2/Sash1/Efna1/Arhgef5/Srcin1/Lrp8/Ptpn1/Thbs1/Nckap1l/Cd24a/Mdfic/Lyn/Erbb2/Ajuba/Irak1/Ttbk1/Dab2ip/Adora1/Bmp4/Camk1/Kitl/Map3k8/Vangl2/Map3k5/Nek6/Npm1/Cdkn1a/Tirap/An…	72
BP	GO:0001909	leukocyte mediated cytotoxicity	24|1439	98|16518	2.49944e-06	5.28246e-05	ENSMUSG00000035929/ENSMUSG00000061232/ENSMUSG00000060802/ENSMUSG00000073411/ENSMUSG00000030560/ENSMUSG00000067212/ENSMUSG00000032359/ENSMUSG00000026395/ENSMUSG00000027718/ENSMUSG00000037321/ENSMUSG00000030124/ENSMUSG00000001123/ENSMUSG00000016206/ENSMUSG00000073409/ENSMUSG00000040511/ENSMUSG00000029468/ENSMUSG00000035385/ENSMUSG00000060550/ENSMUSG00000004266/ENSMUSG00000020919/ENSMUSG00000056116/…	H2-Q4/H2-K1/B2m/H2-D1/Ctsc/H2-T23/Ctsh/Ptprc/Il21/Tap1/Lag3/Lgals9/H2-M3/H2-Q6/Pvr/P2rx7/Ccl2/H2-Q7/Ptpn6/Stat5b/H2-T22/Vav1/Fam49b/Stat5a	24
BP	GO:0051222	positive regulation of protein transport	61|1439	382|16518	2.50115e-06	5.28246e-05	ENSMUSG00000030341/ENSMUSG00000031328/ENSMUSG00000040296/ENSMUSG00000026896/ENSMUSG00000067212/ENSMUSG00000024810/ENSMUSG00000024621/ENSMUSG00000030662/ENSMUSG00000021057/ENSMUSG00000015968/ENSMUSG00000020122/ENSMUSG00000031075/ENSMUSG00000003161/ENSMUSG00000022469/ENSMUSG00000001761/ENSMUSG00000025888/ENSMUSG00000027995/ENSMUSG00000002897/ENSMUSG00000026589/ENSMUSG00000003352/ENSMUSG00000021994/…	Tnfrsf1a/Flna/Ddx58/Ifih1/H2-T23/Il33/Csf1r/Ipo5/Akap5/Cacna1d/Egfr/Ano1/Sri/Rapgef3/Smo/Casp1/Tlr2/Il17ra/Sec16b/Cacnb3/Wnt5a/Asph/Lgals9/Fyn/Tgfb2/Oxct1/Tlr4/Bag3/Cyp2j6/Hmgb1/P2rx7/Isl1/Ccl2/Arhgef5/Cd274/Acsl3/Ezr/Wls/Erbb2/Lrp1/Cd300c2/Prr5l/Abat/Cd276/Ccr5/Camk1/Cd34/Zic1/Rapgef4/Myo1c/Vsnl1/Tmem173/Ptgs2/Jup/Ang/Arid5a/Sybu/Prkcq/Trpm4/Il17rc/Tcaf2	61
BP	GO:0043583	ear development	39|1439	205|16518	2.52988e-06	5.32252e-05	ENSMUSG00000071637/ENSMUSG00000026923/ENSMUSG00000061232/ENSMUSG00000031565/ENSMUSG00000036905/ENSMUSG00000003534/ENSMUSG00000043850/ENSMUSG00000067212/ENSMUSG00000018593/ENSMUSG00000034957/ENSMUSG00000025921/ENSMUSG00000002799/ENSMUSG00000019789/ENSMUSG00000022483/ENSMUSG00000000567/ENSMUSG00000014773/ENSMUSG00000020140/ENSMUSG00000024620/ENSMUSG00000052957/ENSMUSG00000023972/ENSMUSG00000005917/…	Cebpd/Notch1/H2-K1/Fgfr1/C1qb/Ddr1/Clrn1/H2-T23/Sparc/Cebpa/Rdh10/Jag2/Hey2/Col2a1/Sox9/Dll1/Lgr5/Pdgfrb/Gas1/Ptk7/Otx1/Kcnq4/Wnt5a/Tgfb2/Ror2/Frzb/Maf/Bmp4/Abr/Fat4/Zic1/Lrig1/Vangl2/Ripor2/Col11a1/Fzd6/Kcnk3/Sox2/Gabrb3	39
BP	GO:0061900	glial cell activation	13|1439	34|16518	2.55846e-06	5.36195e-05	ENSMUSG00000022037/ENSMUSG00000052336/ENSMUSG00000024810/ENSMUSG00000022892/ENSMUSG00000020122/ENSMUSG00000024397/ENSMUSG00000001761/ENSMUSG00000025888/ENSMUSG00000027995/ENSMUSG00000039005/ENSMUSG00000040249/ENSMUSG00000015599/ENSMUSG00000031778	Clu/Cx3cr1/Il33/App/Egfr/Aif1/Smo/Casp1/Tlr2/Tlr4/Lrp1/Ttbk1/Cx3cl1	13
MF	GO:0019955	cytokine binding	26|1421	106|16303	9.42879e-07	5.56298e-05	ENSMUSG00000030111/ENSMUSG00000030341/ENSMUSG00000028583/ENSMUSG00000028599/ENSMUSG00000052336/ENSMUSG00000026072/ENSMUSG00000044786/ENSMUSG00000050069/ENSMUSG00000024621/ENSMUSG00000024940/ENSMUSG00000041120/ENSMUSG00000021756/ENSMUSG00000055737/ENSMUSG00000037872/ENSMUSG00000041936/ENSMUSG00000001870/ENSMUSG00000027087/ENSMUSG00000027009/ENSMUSG00000026836/ENSMUSG00000066551/ENSMUSG00000032440/…	A2m/Tnfrsf1a/Pdpn/Tnfrsf1b/Cx3cr1/Il1r1/Zfp36/Grem2/Csf1r/Ltbp3/Nbl1/Il6st/Ghr/Ackr1/Agrn/Ltbp1/Itgav/Itga4/Acvr1/Hmgb1/Tgfbr2/Thbs1/Tgfbr3/Itgb1/Ccr5/Il13ra1	26
BP	GO:0031098	stress-activated protein kinase signaling cascade	45|1439	252|16518	2.6822e-06	5.59973e-05	ENSMUSG00000015312/ENSMUSG00000033327/ENSMUSG00000019997/ENSMUSG00000024079/ENSMUSG00000044786/ENSMUSG00000021182/ENSMUSG00000030339/ENSMUSG00000022892/ENSMUSG00000032060/ENSMUSG00000020122/ENSMUSG00000032554/ENSMUSG00000056073/ENSMUSG00000031714/ENSMUSG00000026074/ENSMUSG00000024778/ENSMUSG00000021994/ENSMUSG00000039239/ENSMUSG00000039005/ENSMUSG00000021464/ENSMUSG00000066551/ENSMUSG00000027223/…	Gadd45b/Tnxb/Ctgf/Eif2ak2/Zfp36/Ccdc88c/Ltbr/App/Cryab/Egfr/Trf/Grik2/Gab1/Map4k4/Fas/Wnt5a/Tgfb2/Tlr4/Ror2/Hmgb1/Mapk8ip1/Sash1/Arhgef5/Trib1/Ptpn1/Irak4/Ezr/Zfp36l1/Mdfic/Lyn/Nod1/Sfrp1/Irak1/Myd88/Dab2ip/Cdc42se1/Map3k8/Vangl2/Map3k5/Nek6/Tirap/Map3k9/Rassf2/Zeb2/Dact1	45
BP	GO:0051403	stress-activated MAPK cascade	41|1439	221|16518	2.7483e-06	5.69411e-05	ENSMUSG00000015312/ENSMUSG00000033327/ENSMUSG00000019997/ENSMUSG00000024079/ENSMUSG00000044786/ENSMUSG00000030339/ENSMUSG00000022892/ENSMUSG00000032060/ENSMUSG00000020122/ENSMUSG00000032554/ENSMUSG00000056073/ENSMUSG00000031714/ENSMUSG00000026074/ENSMUSG00000024778/ENSMUSG00000021994/ENSMUSG00000039239/ENSMUSG00000039005/ENSMUSG00000021464/ENSMUSG00000066551/ENSMUSG00000027223/ENSMUSG00000015305/…	Gadd45b/Tnxb/Ctgf/Eif2ak2/Zfp36/Ltbr/App/Cryab/Egfr/Trf/Grik2/Gab1/Map4k4/Fas/Wnt5a/Tgfb2/Tlr4/Ror2/Hmgb1/Mapk8ip1/Sash1/Arhgef5/Trib1/Ptpn1/Irak4/Ezr/Zfp36l1/Mdfic/Nod1/Sfrp1/Irak1/Myd88/Dab2ip/Cdc42se1/Vangl2/Map3k5/Tirap/Map3k9/Rassf2/Zeb2/Dact1	41
BP	GO:1903522	regulation of blood circulation	41|1439	221|16518	2.7483e-06	5.69411e-05	ENSMUSG00000028635/ENSMUSG00000026414/ENSMUSG00000037405/ENSMUSG00000007655/ENSMUSG00000019997/ENSMUSG00000024935/ENSMUSG00000031328/ENSMUSG00000030669/ENSMUSG00000019789/ENSMUSG00000033161/ENSMUSG00000044080/ENSMUSG00000052920/ENSMUSG00000015968/ENSMUSG00000020122/ENSMUSG00000003161/ENSMUSG00000010066/ENSMUSG00000041936/ENSMUSG00000053965/ENSMUSG00000050730/ENSMUSG00000011751/ENSMUSG00000039239/…	Edn2/Tnnt2/Icam1/Cav1/Ctgf/Slc1a1/Flna/Calca/Hey2/Atp1a1/S100a1/Prkg1/Cacna1d/Egfr/Sri/Cacna2d2/Agrn/Pde5a/Arhgap42/Sptbn4/Tgfb2/Tmem65/Oxtr/Dmpk/Kcne1l/Cacna1b/Thra/Kcna5/Ptgs1/Cx3cl1/Cacna1g/Adora1/Rgs4/Tbxas1/Ptgs2/Jup/Scn3b/Spx/Trpm4/Nos1ap/Pde4b	41
BP	GO:1903038	negative regulation of leukocyte cell-cell adhesion	26|1439	112|16518	2.85155e-06	5.88563e-05	ENSMUSG00000022508/ENSMUSG00000023915/ENSMUSG00000024659/ENSMUSG00000018899/ENSMUSG00000076441/ENSMUSG00000053965/ENSMUSG00000030124/ENSMUSG00000001123/ENSMUSG00000016206/ENSMUSG00000066551/ENSMUSG00000016496/ENSMUSG00000056501/ENSMUSG00000047139/ENSMUSG00000073421/ENSMUSG00000062312/ENSMUSG00000004266/ENSMUSG00000035914/ENSMUSG00000074715/ENSMUSG00000021835/ENSMUSG00000020612/ENSMUSG00000078202/…	Bcl6/Tnfrsf21/Anxa1/Irf1/Ass1/Pde5a/Lag3/Lgals9/H2-M3/Hmgb1/Cd274/Cebpb/Cd24a/H2-Ab1/Erbb2/Ptpn6/Cd276/Ccl28/Bmp4/Prkar1a/Nrarp/Vsir/Pag1/Zfp608/Ripor2/Cd86	26
BP	GO:0051924	regulation of calcium ion transport	43|1439	237|16518	2.90193e-06	5.96702e-05	ENSMUSG00000037405/ENSMUSG00000007655/ENSMUSG00000032562/ENSMUSG00000034855/ENSMUSG00000044080/ENSMUSG00000021057/ENSMUSG00000017400/ENSMUSG00000015968/ENSMUSG00000034462/ENSMUSG00000003161/ENSMUSG00000022469/ENSMUSG00000050335/ENSMUSG00000003352/ENSMUSG00000028207/ENSMUSG00000019843/ENSMUSG00000039239/ENSMUSG00000069833/ENSMUSG00000029468/ENSMUSG00000032231/ENSMUSG00000004113/ENSMUSG00000006519/…	Icam1/Cav1/Gnai2/Cxcl10/S100a1/Akap5/Stac2/Cacna1d/Pkd2/Sri/Rapgef3/Lgals3/Cacnb3/Asph/Fyn/Tgfb2/Ahnak/P2rx7/Anxa2/Cacna1b/Cyba/Plcg1/Cacna1a/Cacnb4/Lyn/Gem/Ccl12/Ptpn6/Capn3/Cx3cl1/Cacna1g/P2ry12/Rgs4/Bmp4/Tspo/Itpr1/Ptgs2/Camk2a/Pik3cg/Slc8b1/Selenon/Nos1ap/Pde4b	43
BP	GO:1903706	regulation of hemopoiesis	56|1439	342|16518	2.93223e-06	6.00667e-05	ENSMUSG00000004040/ENSMUSG00000026923/ENSMUSG00000060802/ENSMUSG00000023367/ENSMUSG00000022508/ENSMUSG00000024079/ENSMUSG00000029810/ENSMUSG00000014599/ENSMUSG00000034394/ENSMUSG00000000957/ENSMUSG00000002602/ENSMUSG00000036896/ENSMUSG00000035692/ENSMUSG00000044786/ENSMUSG00000019982/ENSMUSG00000024659/ENSMUSG00000024621/ENSMUSG00000018899/ENSMUSG00000026104/ENSMUSG00000030579/ENSMUSG00000037465/…	Stat3/Notch1/B2m/Tmem176a/Bcl6/Eif2ak2/Tmem176b/Csf1/Lif/Mmp14/Axl/C1qc/Isg15/Zfp36/Myb/Anxa1/Csf1r/Irf1/Stat1/Tyrobp/Klf10/Fbn1/Dll1/Tox/Ptprc/Rbp1/Il21/Fas/Lgals9/H2-M3/Ror2/Cdk6/Hmgb1/Notch2/Runx1/Tgfbr2/Rab7b/Trib1/Nckap1l/Cebpb/Cd24a/Zfp36l1/Lyn/Erbb2/Sfrp1/Ptpn6/Gas2l1/Stat5b/Bmp4/Kitl/Zmiz1/Nrarp/Vsir/Zfp608/Stat5a/Rassf2	56
BP	GO:0051091	positive regulation of DNA binding transcription factor activity	40|1439	214|16518	2.9872e-06	6.08914e-05	ENSMUSG00000022037/ENSMUSG00000037405/ENSMUSG00000020227/ENSMUSG00000024079/ENSMUSG00000052336/ENSMUSG00000028517/ENSMUSG00000026674/ENSMUSG00000040296/ENSMUSG00000044674/ENSMUSG00000022892/ENSMUSG00000015968/ENSMUSG00000001761/ENSMUSG00000027995/ENSMUSG00000000290/ENSMUSG00000021994/ENSMUSG00000039005/ENSMUSG00000052688/ENSMUSG00000052889/ENSMUSG00000033542/ENSMUSG00000028613/ENSMUSG00000059883/…	Clu/Icam1/Irak3/Eif2ak2/Cx3cr1/Plpp3/Ddr2/Ddx58/Fzd1/App/Cacna1d/Smo/Tlr2/Itgb2/Wnt5a/Tlr4/Rab7b/Prkcb/Arhgef5/Lrp8/Irak4/Lrrfip1/Nod1/Irak1/Capn3/Myd88/Cx3cl1/Irak2/Prkch/Tmem173/Trim21/Mid2/Camk2a/Npm1/Jup/Tirap/Prkcq/Arid5b/Ndp/Lrp5	40
BP	GO:0031341	regulation of cell killing	22|1439	86|16518	2.99484e-06	6.08914e-05	ENSMUSG00000035929/ENSMUSG00000061232/ENSMUSG00000060802/ENSMUSG00000073411/ENSMUSG00000067212/ENSMUSG00000026395/ENSMUSG00000027718/ENSMUSG00000037321/ENSMUSG00000030124/ENSMUSG00000001123/ENSMUSG00000016206/ENSMUSG00000073409/ENSMUSG00000040511/ENSMUSG00000029468/ENSMUSG00000035385/ENSMUSG00000060550/ENSMUSG00000020919/ENSMUSG00000079227/ENSMUSG00000056116/ENSMUSG00000034116/ENSMUSG00000022378/…	H2-Q4/H2-K1/B2m/H2-D1/H2-T23/Ptprc/Il21/Tap1/Lag3/Lgals9/H2-M3/H2-Q6/Pvr/P2rx7/Ccl2/H2-Q7/Stat5b/Ccr5/H2-T22/Vav1/Fam49b/Stat5a	22
BP	GO:0032102	negative regulation of response to external stimulus	48|1439	277|16518	3.02441e-06	6.1264e-05	ENSMUSG00000037225/ENSMUSG00000023224/ENSMUSG00000026923/ENSMUSG00000053113/ENSMUSG00000030341/ENSMUSG00000022912/ENSMUSG00000028599/ENSMUSG00000052336/ENSMUSG00000002985/ENSMUSG00000070509/ENSMUSG00000029231/ENSMUSG00000044786/ENSMUSG00000028163/ENSMUSG00000030342/ENSMUSG00000041120/ENSMUSG00000052920/ENSMUSG00000027712/ENSMUSG00000032194/ENSMUSG00000024397/ENSMUSG00000063531/ENSMUSG00000003352/…	Fgf2/Serping1/Notch1/Socs3/Tnfrsf1a/Pros1/Tnfrsf1b/Cx3cr1/Apoe/Rgma/Pdgfra/Zfp36/Nfkb1/Cd9/Nbl1/Prkg1/Anxa5/Kank2/Aif1/Sema3e/Cacnb3/Wnt5a/Lgals9/Isl1/Inpp5f/Trib1/Anxa2/Ctnna2/Thbs1/Smad3/Cd24a/Ccl12/Sema6a/Abat/Cd276/Abcc8/Eppk1/Adora1/Abr/Cd34/Rtn4rl1/Ajap1/Sema4g/Krt1/Slit2/Dhx58/Dbn1/Serpine2	48
MF	GO:0046873	metal ion transmembrane transporter activity	64|1421	398|16303	1.12875e-06	6.2679e-05	ENSMUSG00000055368/ENSMUSG00000034248/ENSMUSG00000024935/ENSMUSG00000045246/ENSMUSG00000034810/ENSMUSG00000017765/ENSMUSG00000033161/ENSMUSG00000001985/ENSMUSG00000027712/ENSMUSG00000015968/ENSMUSG00000031517/ENSMUSG00000034462/ENSMUSG00000032554/ENSMUSG00000010066/ENSMUSG00000032412/ENSMUSG00000056073/ENSMUSG00000027087/ENSMUSG00000013275/ENSMUSG00000060961/ENSMUSG00000026177/ENSMUSG00000028631/…	Slc6a2/Slc25a37/Slc1a1/Kcng4/Scn7a/Slc12a4/Atp1a1/Grik3/Anxa5/Cacna1d/Gpm6a/Pkd2/Trf/Cacna2d2/Atp1b3/Grik2/Itgav/Slc41a1/Slc4a4/Slc11a1/Kcnq4/Cacnb3/Slc6a8/Kcnq2/Kcnip1/Slc4a5/Slc1a3/Slc39a12/Anxa2/Kcne1l/Cacna1b/Itpr3/Scn3a/Slc13a4/Kcna5/Slc6a9/Cacna1a/Jph1/Cacnb4/Tpcn2/Slc39a1/Anxa6/Kcnt1/Cacna1g/Abcc8/Slc12a7/Kcnk9/Scnn1a/Slc4a10/Scn1a/Itpr1/Scn8a/Kcnk1/Nipal2/Slc9a6/Tpcn1/Trpm1/Scn3b/Slc6a1/S…	64
BP	GO:0002819	regulation of adaptive immune response	33|1439	162|16518	3.1874e-06	6.43264e-05	ENSMUSG00000035929/ENSMUSG00000061232/ENSMUSG00000060802/ENSMUSG00000073411/ENSMUSG00000022508/ENSMUSG00000020641/ENSMUSG00000026072/ENSMUSG00000067212/ENSMUSG00000024810/ENSMUSG00000024659/ENSMUSG00000018899/ENSMUSG00000026395/ENSMUSG00000026177/ENSMUSG00000002147/ENSMUSG00000016206/ENSMUSG00000073409/ENSMUSG00000040511/ENSMUSG00000040663/ENSMUSG00000066551/ENSMUSG00000029468/ENSMUSG00000016496/…	H2-Q4/H2-K1/B2m/H2-D1/Bcl6/Rsad2/Il1r1/H2-T23/Il33/Anxa1/Irf1/Ptprc/Slc11a1/Stat6/H2-M3/H2-Q6/Pvr/Clcf1/Hmgb1/P2rx7/Cd274/Cd24a/C3/H2-Ab1/H2-Q7/Ptpn6/Fcer1g/H2-T22/Vsir/Fam49b/Arid5a/Prkcq/Trpm4	33
CC	GO:0043197	dendritic spine	37|1463	194|16707	4.81559e-06	6.4743e-05	ENSMUSG00000061718/ENSMUSG00000020388/ENSMUSG00000053931/ENSMUSG00000043079/ENSMUSG00000006435/ENSMUSG00000021057/ENSMUSG00000022892/ENSMUSG00000032060/ENSMUSG00000025892/ENSMUSG00000031517/ENSMUSG00000003161/ENSMUSG00000025555/ENSMUSG00000055254/ENSMUSG00000068748/ENSMUSG00000035863/ENSMUSG00000053550/ENSMUSG00000005360/ENSMUSG00000020524/ENSMUSG00000017314/ENSMUSG00000001986/ENSMUSG00000028943/…	Ppp1r1b/Pdlim4/Cnn3/Synpo/Neurl1a/Akap5/App/Cryab/Gria4/Gpm6a/Sri/Farp1/Ntrk2/Ptprz1/Palm/Shisa7/Slc1a3/Gria1/Mpp2/Gria3/Espn/Grk3/Dlgap3/Shisa6/Sez6/Itgb1/Comt/Adora1/Rapgef4/Camk2a/Shisa8/Arc/Dbn1/Adgrb1/Syt11/Ophn1/Pde4b	37
MF	GO:0005518	collagen binding	19|1421	64|16303	1.25471e-06	6.58026e-05	ENSMUSG00000029718/ENSMUSG00000038642/ENSMUSG00000033327/ENSMUSG00000003534/ENSMUSG00000001507/ENSMUSG00000026674/ENSMUSG00000018593/ENSMUSG00000035258/ENSMUSG00000070436/ENSMUSG00000039116/ENSMUSG00000040152/ENSMUSG00000032402/ENSMUSG00000001930/ENSMUSG00000025809/ENSMUSG00000023328/ENSMUSG00000039115/ENSMUSG00000020953/ENSMUSG00000054162/ENSMUSG00000033420	Pcolce/Ctss/Tnxb/Ddr1/Itga3/Ddr2/Sparc/Abi3bp/Serpinh1/Adgrg6/Thbs1/Smad3/Vwf/Itgb1/Ache/Itga9/Coch/Spock3/Antxr1	19
BP	GO:0034765	regulation of ion transmembrane transport	66|1439	428|16518	3.35493e-06	6.74576e-05	ENSMUSG00000038642/ENSMUSG00000007655/ENSMUSG00000031328/ENSMUSG00000045246/ENSMUSG00000025351/ENSMUSG00000034810/ENSMUSG00000034855/ENSMUSG00000007041/ENSMUSG00000044080/ENSMUSG00000052920/ENSMUSG00000017400/ENSMUSG00000015968/ENSMUSG00000034462/ENSMUSG00000003161/ENSMUSG00000010066/ENSMUSG00000032412/ENSMUSG00000041936/ENSMUSG00000064210/ENSMUSG00000022469/ENSMUSG00000028631/ENSMUSG00000003352/…	Ctss/Cav1/Flna/Kcng4/Cd63/Scn7a/Cxcl10/Clic1/S100a1/Prkg1/Stac2/Cacna1d/Pkd2/Sri/Cacna2d2/Atp1b3/Agrn/Ano6/Rapgef3/Kcnq4/Cacnb3/Asph/Fyn/Tgfb2/Ahnak/P2rx7/Kcnip1/Shisa7/Kcne1l/Cacna1b/Scn3a/Thbs1/Cyba/Plcg1/Kcna5/Fhl1/Cacna1a/Cacnb4/Tpcn2/Lyn/Gem/Htr3a/Ptpn6/Ptpn3/Shisa6/Capn3/Cx3cl1/Amigo1/Cacna1g/Abcc8/Rgs4/Bmp4/Dapk1/Scn1a/Scn8a/Shisa8/Arc/Crhbp/Pik3cg/Arl6ip1/Tpcn1/Scn3b/Selenon/Tcaf2/Nos1ap/…	66
BP	GO:0007411	axon guidance	38|1439	200|16518	3.49693e-06	7.00544e-05	ENSMUSG00000036030/ENSMUSG00000030077/ENSMUSG00000030123/ENSMUSG00000056427/ENSMUSG00000027168/ENSMUSG00000024621/ENSMUSG00000022892/ENSMUSG00000026640/ENSMUSG00000045136/ENSMUSG00000041936/ENSMUSG00000001761/ENSMUSG00000052957/ENSMUSG00000059714/ENSMUSG00000022324/ENSMUSG00000063531/ENSMUSG00000021994/ENSMUSG00000039239/ENSMUSG00000058056/ENSMUSG00000008575/ENSMUSG00000052911/ENSMUSG00000042258/…	Prtg/Chl1/Plxnd1/Slit3/Pax6/Csf1r/App/Plxna2/Tubb2b/Agrn/Smo/Gas1/Flot1/Matn2/Sema3e/Wnt5a/Tgfb2/Palld/Nfib/Lamb2/Isl1/Efna1/Plxna1/Flrt3/Kif5a/Erbb2/Sema6a/Chn1/Efnb1/Plxnb2/Boc/Gap43/Vangl2/Sema4g/Efnb2/Emb/Slit2/Unc5d	38
BP	GO:0002456	T cell mediated immunity	24|1439	100|16518	3.6619e-06	7.30904e-05	ENSMUSG00000035929/ENSMUSG00000061232/ENSMUSG00000037405/ENSMUSG00000060802/ENSMUSG00000073411/ENSMUSG00000020641/ENSMUSG00000030560/ENSMUSG00000026072/ENSMUSG00000067212/ENSMUSG00000032359/ENSMUSG00000026395/ENSMUSG00000026177/ENSMUSG00000016206/ENSMUSG00000073409/ENSMUSG00000040511/ENSMUSG00000066551/ENSMUSG00000029468/ENSMUSG00000047139/ENSMUSG00000060550/ENSMUSG00000056116/ENSMUSG00000020101/…	H2-Q4/H2-K1/Icam1/B2m/H2-D1/Rsad2/Ctsc/Il1r1/H2-T23/Ctsh/Ptprc/Slc11a1/H2-M3/H2-Q6/Pvr/Hmgb1/P2rx7/Cd24a/H2-Q7/H2-T22/Vsir/Fam49b/Arid5a/Trpm4	24
BP	GO:0001914	regulation of T cell mediated cytotoxicity	13|1439	35|16518	3.74676e-06	7.45113e-05	ENSMUSG00000035929/ENSMUSG00000061232/ENSMUSG00000060802/ENSMUSG00000073411/ENSMUSG00000067212/ENSMUSG00000026395/ENSMUSG00000016206/ENSMUSG00000073409/ENSMUSG00000040511/ENSMUSG00000029468/ENSMUSG00000060550/ENSMUSG00000056116/ENSMUSG00000022378	H2-Q4/H2-K1/B2m/H2-D1/H2-T23/Ptprc/H2-M3/H2-Q6/Pvr/P2rx7/H2-Q7/H2-T22/Fam49b	13
BP	GO:0097485	neuron projection guidance	38|1439	201|16518	3.95688e-06	7.8372e-05	ENSMUSG00000036030/ENSMUSG00000030077/ENSMUSG00000030123/ENSMUSG00000056427/ENSMUSG00000027168/ENSMUSG00000024621/ENSMUSG00000022892/ENSMUSG00000026640/ENSMUSG00000045136/ENSMUSG00000041936/ENSMUSG00000001761/ENSMUSG00000052957/ENSMUSG00000059714/ENSMUSG00000022324/ENSMUSG00000063531/ENSMUSG00000021994/ENSMUSG00000039239/ENSMUSG00000058056/ENSMUSG00000008575/ENSMUSG00000052911/ENSMUSG00000042258/…	Prtg/Chl1/Plxnd1/Slit3/Pax6/Csf1r/App/Plxna2/Tubb2b/Agrn/Smo/Gas1/Flot1/Matn2/Sema3e/Wnt5a/Tgfb2/Palld/Nfib/Lamb2/Isl1/Efna1/Plxna1/Flrt3/Kif5a/Erbb2/Sema6a/Chn1/Efnb1/Plxnb2/Boc/Gap43/Vangl2/Sema4g/Efnb2/Emb/Slit2/Unc5d	38
BP	GO:1900182	positive regulation of protein localization to nucleus	21|1439	81|16518	3.96966e-06	7.8372e-05	ENSMUSG00000030341/ENSMUSG00000031328/ENSMUSG00000034394/ENSMUSG00000022906/ENSMUSG00000030662/ENSMUSG00000021057/ENSMUSG00000033170/ENSMUSG00000049502/ENSMUSG00000001761/ENSMUSG00000014303/ENSMUSG00000019843/ENSMUSG00000039239/ENSMUSG00000030847/ENSMUSG00000017412/ENSMUSG00000032368/ENSMUSG00000024349/ENSMUSG00000032487/ENSMUSG00000000058/ENSMUSG00000057113/ENSMUSG00000001552/ENSMUSG00000026778	Tnfrsf1a/Flna/Lif/Parp9/Ipo5/Akap5/Card10/Dtx3l/Smo/Glis2/Fyn/Tgfb2/Bag3/Cacnb4/Zic1/Tmem173/Ptgs2/Cav2/Npm1/Jup/Prkcq	21
BP	GO:0050731	positive regulation of peptidyl-tyrosine phosphorylation	34|1439	171|16518	4.00068e-06	7.86993e-05	ENSMUSG00000030341/ENSMUSG00000005087/ENSMUSG00000037405/ENSMUSG00000034394/ENSMUSG00000022906/ENSMUSG00000028517/ENSMUSG00000044716/ENSMUSG00000029231/ENSMUSG00000034422/ENSMUSG00000006435/ENSMUSG00000024621/ENSMUSG00000021756/ENSMUSG00000055737/ENSMUSG00000041936/ENSMUSG00000023992/ENSMUSG00000026395/ENSMUSG00000027718/ENSMUSG00000019843/ENSMUSG00000039005/ENSMUSG00000068748/ENSMUSG00000040663/…	Tnfrsf1a/Cd44/Icam1/Lif/Parp9/Plpp3/Dok7/Pdgfra/Parp14/Neurl1a/Csf1r/Il6st/Ghr/Agrn/Trem2/Ptprc/Il21/Fyn/Tlr4/Ptprz1/Clcf1/Gprc5b/Isl1/Efna1/Srcin1/Lrp8/Ptpn1/Cd24a/Enpp2/Lyn/Itgb1/Adora1/Kitl/Cav2	34
CC	GO:0034706	sodium channel complex	10|1463	22|16707	6.22443e-06	8.01229e-05	ENSMUSG00000034810/ENSMUSG00000001985/ENSMUSG00000025892/ENSMUSG00000056073/ENSMUSG00000057182/ENSMUSG00000030340/ENSMUSG00000064329/ENSMUSG00000023033/ENSMUSG00000049281/ENSMUSG00000038260	Scn7a/Grik3/Gria4/Grik2/Scn3a/Scnn1a/Scn1a/Scn8a/Scn3b/Trpm4	10
CC	GO:0042611	MHC protein complex	10|1463	22|16707	6.22443e-06	8.01229e-05	ENSMUSG00000035929/ENSMUSG00000061232/ENSMUSG00000060802/ENSMUSG00000073411/ENSMUSG00000067212/ENSMUSG00000016206/ENSMUSG00000073409/ENSMUSG00000026471/ENSMUSG00000073421/ENSMUSG00000060550	H2-Q4/H2-K1/B2m/H2-D1/H2-T23/H2-M3/H2-Q6/Mr1/H2-Ab1/H2-Q7	10
BP	GO:0008015	blood circulation	65|1439	422|16518	4.13292e-06	8.10082e-05	ENSMUSG00000028635/ENSMUSG00000026414/ENSMUSG00000037405/ENSMUSG00000007655/ENSMUSG00000019997/ENSMUSG00000024935/ENSMUSG00000031328/ENSMUSG00000002985/ENSMUSG00000030669/ENSMUSG00000038235/ENSMUSG00000019789/ENSMUSG00000033161/ENSMUSG00000064179/ENSMUSG00000051359/ENSMUSG00000044080/ENSMUSG00000052920/ENSMUSG00000015968/ENSMUSG00000020122/ENSMUSG00000003161/ENSMUSG00000010066/ENSMUSG00000041936/…	Edn2/Tnnt2/Icam1/Cav1/Ctgf/Slc1a1/Flna/Apoe/Calca/F11r/Hey2/Atp1a1/Tnnt1/Ncald/S100a1/Prkg1/Cacna1d/Egfr/Sri/Cacna2d2/Agrn/Dll1/Pde5a/Arhgap42/Grip2/Plcb3/Sptbn4/Tgfb2/Tmem65/Mgll/Ptprj/Ddah1/Gclm/Slc4a5/Oxtr/Dmpk/Rasl10b/Kcne1l/Cacna1b/Thra/Cyba/Smad3/Kcna5/Ptgs1/Abat/Cx3cl1/Cacna1g/Adora1/Rgs4/Abr/Cd34/Col1a2/Tbxas1/Scn1a/Ptgs2/Jup/Slit2/Scn3b/Spx/Hmox1/Trpm4/Gucy1a1/Nos1ap/Lrp5/Pde4b	65
BP	GO:0046847	filopodium assembly	17|1439	57|16518	4.18738e-06	8.17815e-05	ENSMUSG00000022272/ENSMUSG00000006435/ENSMUSG00000031517/ENSMUSG00000041936/ENSMUSG00000037509/ENSMUSG00000024143/ENSMUSG00000039735/ENSMUSG00000035863/ENSMUSG00000033342/ENSMUSG00000028943/ENSMUSG00000052397/ENSMUSG00000022099/ENSMUSG00000047261/ENSMUSG00000027111/ENSMUSG00000034675/ENSMUSG00000036006/ENSMUSG00000026778	Myo10/Neurl1a/Gpm6a/Agrn/Arhgef4/Rhoq/Fnbp1l/Palm/Plppr5/Espn/Ezr/Dmtn/Gap43/Itga6/Dbn1/Ripor2/Prkcq	17
BP	GO:0050868	negative regulation of T cell activation	24|1439	101|16518	4.41163e-06	8.58536e-05	ENSMUSG00000022508/ENSMUSG00000023915/ENSMUSG00000024659/ENSMUSG00000018899/ENSMUSG00000053965/ENSMUSG00000030124/ENSMUSG00000001123/ENSMUSG00000016206/ENSMUSG00000066551/ENSMUSG00000016496/ENSMUSG00000056501/ENSMUSG00000047139/ENSMUSG00000073421/ENSMUSG00000062312/ENSMUSG00000004266/ENSMUSG00000035914/ENSMUSG00000021835/ENSMUSG00000020612/ENSMUSG00000078202/ENSMUSG00000020101/ENSMUSG00000027508/…	Bcl6/Tnfrsf21/Anxa1/Irf1/Pde5a/Lag3/Lgals9/H2-M3/Hmgb1/Cd274/Cebpb/Cd24a/H2-Ab1/Erbb2/Ptpn6/Cd276/Bmp4/Prkar1a/Nrarp/Vsir/Pag1/Zfp608/Ripor2/Cd86	24
CC	GO:0031527	filopodium membrane	9|1463	18|16707	6.92271e-06	8.7255e-05	ENSMUSG00000028583/ENSMUSG00000022272/ENSMUSG00000001507/ENSMUSG00000031207/ENSMUSG00000021057/ENSMUSG00000027087/ENSMUSG00000035863/ENSMUSG00000047261/ENSMUSG00000033420	Pdpn/Myo10/Itga3/Msn/Akap5/Itgav/Palm/Gap43/Antxr1	9
CC	GO:0034703	cation channel complex	38|1463	205|16707	7.24006e-06	8.93925e-05	ENSMUSG00000032172/ENSMUSG00000045246/ENSMUSG00000034810/ENSMUSG00000001985/ENSMUSG00000025892/ENSMUSG00000015968/ENSMUSG00000010066/ENSMUSG00000056073/ENSMUSG00000026833/ENSMUSG00000028631/ENSMUSG00000017167/ENSMUSG00000003352/ENSMUSG00000016346/ENSMUSG00000053519/ENSMUSG00000053550/ENSMUSG00000020524/ENSMUSG00000090122/ENSMUSG00000004113/ENSMUSG00000057182/ENSMUSG00000001986/ENSMUSG00000045534/…	Olfm2/Kcng4/Scn7a/Grik3/Gria4/Cacna1d/Cacna2d2/Grik2/Olfm1/Kcnq4/Cntnap1/Cacnb3/Kcnq2/Kcnip1/Shisa7/Gria1/Kcne1l/Cacna1b/Scn3a/Gria3/Kcna5/Cacna1a/Cacnb4/Dlgap3/Htr3a/Shisa6/Amigo1/Cacna1g/Abcc8/Scnn1a/Scn1a/Scn8a/Kcnk1/Shisa8/Scn3b/Trpm4/Nos1ap/Pde4b	38
BP	GO:0002791	regulation of peptide secretion	66|1439	432|16518	4.61893e-06	8.95678e-05	ENSMUSG00000020641/ENSMUSG00000034394/ENSMUSG00000040296/ENSMUSG00000026896/ENSMUSG00000023915/ENSMUSG00000067212/ENSMUSG00000024810/ENSMUSG00000027168/ENSMUSG00000024659/ENSMUSG00000024621/ENSMUSG00000027712/ENSMUSG00000015968/ENSMUSG00000020122/ENSMUSG00000031075/ENSMUSG00000055980/ENSMUSG00000003161/ENSMUSG00000033685/ENSMUSG00000025888/ENSMUSG00000027995/ENSMUSG00000002897/ENSMUSG00000026074/…	Rsad2/Lif/Ddx58/Ifih1/Tnfrsf21/H2-T23/Il33/Pax6/Anxa1/Csf1r/Anxa5/Cacna1d/Egfr/Ano1/Irs1/Sri/Ucp2/Casp1/Tlr2/Il17ra/Map4k4/Wnt5a/Lgals9/Tgfb2/Oxct1/Tlr4/Clcf1/Cyp2j6/Hmgb1/P2rx7/Isl1/Cd274/Srcin1/Rasl10b/P3h1/Ezr/Wls/Rhbdf1/Lyn/Cd300c2/Sfrp1/Abat/Cx3cl1/Cd276/Fn1/Abcc8/Ccr5/Idh2/Adora1/Pde1c/Cd34/Rapgef4/Vsnl1/Anxa4/Midn/Crhbp/Ang/Arid5a/Rab8b/Sybu/Prkcq/Slc8b1/Trpm4/Il17rc/Syt11/Lrp5	66
MF	GO:0005261	cation channel activity	50|1421	288|16303	1.8121e-06	9.00327e-05	ENSMUSG00000035200/ENSMUSG00000045246/ENSMUSG00000034810/ENSMUSG00000052387/ENSMUSG00000018862/ENSMUSG00000001985/ENSMUSG00000025892/ENSMUSG00000015968/ENSMUSG00000031075/ENSMUSG00000031517/ENSMUSG00000034462/ENSMUSG00000010066/ENSMUSG00000064210/ENSMUSG00000056073/ENSMUSG00000027087/ENSMUSG00000028631/ENSMUSG00000003352/ENSMUSG00000016346/ENSMUSG00000029468/ENSMUSG00000053519/ENSMUSG00000020524/…	Chrnb4/Kcng4/Scn7a/Trpm3/Otop3/Grik3/Gria4/Cacna1d/Ano1/Gpm6a/Pkd2/Cacna2d2/Ano6/Grik2/Itgav/Kcnq4/Cacnb3/Kcnq2/P2rx7/Kcnip1/Gria1/Anxa2/Kcne1l/Cacna1b/Itpr3/Scn3a/Gria3/Kcna5/Cacna1a/Jph1/Cacnb4/Tpcn2/Htr3a/Anxa6/Kcnt1/Cacna1g/Abcc8/Kcnk9/Scnn1a/Scn1a/Itpr1/Scn8a/Kcnk1/Cnga3/Tpcn1/Trpm1/Scn3b/Trpm4/Slc24a2/Kcnk3	50
BP	GO:0030178	negative regulation of Wnt signaling pathway	29|1439	136|16518	4.83056e-06	9.33395e-05	ENSMUSG00000026923/ENSMUSG00000007655/ENSMUSG00000020393/ENSMUSG00000002985/ENSMUSG00000027803/ENSMUSG00000044674/ENSMUSG00000032280/ENSMUSG00000070327/ENSMUSG00000000567/ENSMUSG00000038805/ENSMUSG00000020844/ENSMUSG00000040183/ENSMUSG00000021994/ENSMUSG00000021464/ENSMUSG00000027004/ENSMUSG00000042258/ENSMUSG00000030772/ENSMUSG00000078794/ENSMUSG00000034771/ENSMUSG00000031548/ENSMUSG00000053930/…	Notch1/Cav1/Kremen1/Apoe/Wwtr1/Fzd1/Tle3/Rnf213/Sox9/Six3/Nxn/Ankrd6/Wnt5a/Ror2/Frzb/Isl1/Dkk3/Dact3/Tle2/Sfrp1/Shisa6/Dab2ip/Limd1/Tle1/Dact1/Csnk1e/Fzd6/Sox2/Nfatc4	29
BP	GO:1900180	regulation of protein localization to nucleus	28|1439	129|16518	4.88301e-06	9.40195e-05	ENSMUSG00000030341/ENSMUSG00000031328/ENSMUSG00000034394/ENSMUSG00000022906/ENSMUSG00000027499/ENSMUSG00000030662/ENSMUSG00000021057/ENSMUSG00000033170/ENSMUSG00000049502/ENSMUSG00000001761/ENSMUSG00000014303/ENSMUSG00000019843/ENSMUSG00000039239/ENSMUSG00000030847/ENSMUSG00000079363/ENSMUSG00000028063/ENSMUSG00000041390/ENSMUSG00000017412/ENSMUSG00000028078/ENSMUSG00000021835/ENSMUSG00000032368/…	Tnfrsf1a/Flna/Lif/Parp9/Pkia/Ipo5/Akap5/Card10/Dtx3l/Smo/Glis2/Fyn/Tgfb2/Bag3/Gbp4/Lmna/Mdfic/Cacnb4/Dclk2/Bmp4/Zic1/Tmem173/Ptgs2/Cav2/Npm1/Jup/Cdkn1a/Prkcq	28
BP	GO:0001822	kidney development	46|1439	266|16518	5.10549e-06	9.79572e-05	ENSMUSG00000037225/ENSMUSG00000026923/ENSMUSG00000022893/ENSMUSG00000031565/ENSMUSG00000016918/ENSMUSG00000034394/ENSMUSG00000001507/ENSMUSG00000027803/ENSMUSG00000029231/ENSMUSG00000024998/ENSMUSG00000032359/ENSMUSG00000025921/ENSMUSG00000006800/ENSMUSG00000015647/ENSMUSG00000037211/ENSMUSG00000034462/ENSMUSG00000032194/ENSMUSG00000000567/ENSMUSG00000027204/ENSMUSG00000014773/ENSMUSG00000024620/…	Fgf2/Notch1/Adamts1/Fgfr1/Sulf1/Lif/Itga3/Wwtr1/Pdgfra/Plce1/Ctsh/Rdh10/Sulf2/Lama5/Spry1/Pkd2/Kank2/Sox9/Fbn1/Dll1/Pdgfrb/Smo/Ass1/Cited1/Tns2/Glis2/Tgfb2/Lamb2/Gcnt4/Smad3/Cd24a/Gcnt1/Ampd2/Notch3/Yap1/Sfrp1/Bmp4/Cd34/Mpst/Fat4/Vangl2/Anxa4/Efnb2/Slit2/Timeless/Arid5b	46
BP	GO:0061045	negative regulation of wound healing	17|1439	58|16518	5.44671e-06	0.000104137	ENSMUSG00000037225/ENSMUSG00000023224/ENSMUSG00000022912/ENSMUSG00000002985/ENSMUSG00000029231/ENSMUSG00000030342/ENSMUSG00000052920/ENSMUSG00000027712/ENSMUSG00000032231/ENSMUSG00000040152/ENSMUSG00000032402/ENSMUSG00000057880/ENSMUSG00000040136/ENSMUSG00000115388/ENSMUSG00000016494/ENSMUSG00000039546/ENSMUSG00000026249	Fgf2/Serping1/Pros1/Apoe/Pdgfra/Cd9/Prkg1/Anxa5/Anxa2/Thbs1/Smad3/Abat/Abcc8/Eppk1/Cd34/Ajap1/Serpine2	17
BP	GO:0051090	regulation of DNA binding transcription factor activity	56|1439	349|16518	5.51203e-06	0.000105018	ENSMUSG00000022037/ENSMUSG00000037405/ENSMUSG00000020227/ENSMUSG00000024087/ENSMUSG00000024079/ENSMUSG00000031328/ENSMUSG00000052336/ENSMUSG00000028517/ENSMUSG00000026674/ENSMUSG00000040296/ENSMUSG00000074151/ENSMUSG00000044674/ENSMUSG00000022892/ENSMUSG00000015968/ENSMUSG00000034462/ENSMUSG00000003161/ENSMUSG00000030103/ENSMUSG00000001761/ENSMUSG00000027995/ENSMUSG00000000290/ENSMUSG00000021994/…	Clu/Icam1/Irak3/Cyp1b1/Eif2ak2/Flna/Cx3cr1/Plpp3/Ddr2/Ddx58/Nlrc5/Fzd1/App/Cacna1d/Pkd2/Sri/Bhlhe40/Smo/Tlr2/Itgb2/Wnt5a/Glis2/Pim1/Tlr4/Rab7b/Prkcb/Arhgef5/Trib1/Lrp8/Thra/Irak4/Lrrfip1/Nod1/Irak1/Capn3/Myd88/Cx3cl1/Irak2/Dab2ip/Prkch/4930447C04Rik/Tmem173/Trim21/Anxa4/Mid2/Camk2a/Npm1/Jup/Tirap/Hck/Prkcq/Hmox1/Fzd6/Arid5b/Ndp/Lrp5	56
BP	GO:0097530	granulocyte migration	25|1439	109|16518	5.53884e-06	0.000105161	ENSMUSG00000028635/ENSMUSG00000014599/ENSMUSG00000026072/ENSMUSG00000024659/ENSMUSG00000034855/ENSMUSG00000057729/ENSMUSG00000050335/ENSMUSG00000002897/ENSMUSG00000039239/ENSMUSG00000035776/ENSMUSG00000035385/ENSMUSG00000022488/ENSMUSG00000059883/ENSMUSG00000035352/ENSMUSG00000032508/ENSMUSG00000031778/ENSMUSG00000031990/ENSMUSG00000039115/ENSMUSG00000058715/ENSMUSG00000019122/ENSMUSG00000034116/…	Edn2/Csf1/Il1r1/Anxa1/Cxcl10/Prtn3/Lgals3/Il17ra/Tgfb2/Cd99l2/Ccl2/Nckap1l/Irak4/Ccl12/Myd88/Cx3cl1/Jam3/Itga9/Fcer1g/Ccl9/Vav1/Slit2/Ripor2/Il17rc/Pde4b	25
BP	GO:0043405	regulation of MAP kinase activity	47|1439	275|16518	5.6181e-06	0.000106295	ENSMUSG00000037225/ENSMUSG00000015312/ENSMUSG00000020227/ENSMUSG00000031565/ENSMUSG00000033327/ENSMUSG00000007655/ENSMUSG00000024079/ENSMUSG00000002985/ENSMUSG00000024998/ENSMUSG00000037211/ENSMUSG00000055737/ENSMUSG00000020122/ENSMUSG00000032554/ENSMUSG00000031714/ENSMUSG00000026395/ENSMUSG00000053965/ENSMUSG00000021994/ENSMUSG00000039005/ENSMUSG00000025314/ENSMUSG00000021464/ENSMUSG00000027223/…	Fgf2/Gadd45b/Irak3/Fgfr1/Tnxb/Cav1/Eif2ak2/Apoe/Plce1/Spry1/Ghr/Egfr/Trf/Gab1/Ptprc/Pde5a/Wnt5a/Tlr4/Ptprj/Ror2/Mapk8ip1/P2rx7/Sash1/Arhgef5/Trib1/Ptpn1/Thbs1/Dusp6/Cd24a/Mdfic/Lyn/Erbb2/Ajuba/Sfrp1/Irak1/Ptpn6/Dab2ip/Adora1/Bmp4/Kitl/Map3k8/Vangl2/Map3k5/Map3k9/Pik3cg/Zeb2/Inppl1	47
BP	GO:0007156	homophilic cell adhesion via plasma membrane adhesion molecules	32|1439	159|16518	5.83594e-06	0.000110035	ENSMUSG00000036030/ENSMUSG00000022656/ENSMUSG00000046191/ENSMUSG00000006411/ENSMUSG00000031841/ENSMUSG00000051242/ENSMUSG00000031673/ENSMUSG00000043313/ENSMUSG00000045062/ENSMUSG00000044022/ENSMUSG00000058056/ENSMUSG00000040511/ENSMUSG00000005338/ENSMUSG00000073591/ENSMUSG00000068740/ENSMUSG00000046387/ENSMUSG00000033295/ENSMUSG00000048347/ENSMUSG00000050947/ENSMUSG00000044043/ENSMUSG00000036606/…	Prtg/Nectin3/Pcdhb20/Nectin4/Cdh13/Pcdhb9/Cdh11/Pcdhb19/Pcdhb7/Pcdhb21/Palld/Pvr/Cadm3/Pcdhb22/Celsr2/Pcdhb17/Ptprf/Pcdhb18/Amigo1/Pcdhb14/Plxnb2/Amigo2/Pcdh1/Fat4/Pcdhb16/Hmcn1/Emb/Pcdhb8/Cdh3/Pcdh11x/Igsf21/Fat1	32
BP	GO:1902993	positive regulation of amyloid precursor protein catabolic process	8|1439	14|16518	6.05741e-06	0.000113817	ENSMUSG00000022037/ENSMUSG00000022892/ENSMUSG00000038156/ENSMUSG00000020580/ENSMUSG00000027954/ENSMUSG00000039934/ENSMUSG00000042228/ENSMUSG00000022433	Clu/App/Spon1/Rock2/Efna1/Gsap/Lyn/Csnk1e	8
CC	GO:0045178	basal part of cell	17|1463	60|16707	9.67355e-06	0.00011705	ENSMUSG00000007655/ENSMUSG00000048537/ENSMUSG00000043850/ENSMUSG00000030737/ENSMUSG00000020122/ENSMUSG00000034462/ENSMUSG00000032554/ENSMUSG00000022469/ENSMUSG00000028631/ENSMUSG00000057182/ENSMUSG00000062312/ENSMUSG00000044217/ENSMUSG00000036353/ENSMUSG00000016494/ENSMUSG00000017774/ENSMUSG00000039115/ENSMUSG00000027111	Cav1/Phldb1/Clrn1/Slco2b1/Egfr/Pkd2/Trf/Rapgef3/Kcnq4/Scn3a/Erbb2/Aqp5/P2ry12/Cd34/Myo1c/Itga9/Itga6	17
BP	GO:0010769	regulation of cell morphogenesis involved in differentiation	51|1439	309|16518	6.38023e-06	0.00011947	ENSMUSG00000028583/ENSMUSG00000030309/ENSMUSG00000026728/ENSMUSG00000030123/ENSMUSG00000031328/ENSMUSG00000002985/ENSMUSG00000070509/ENSMUSG00000001313/ENSMUSG00000021057/ENSMUSG00000026640/ENSMUSG00000021068/ENSMUSG00000058325/ENSMUSG00000045136/ENSMUSG00000041936/ENSMUSG00000034616/ENSMUSG00000041959/ENSMUSG00000026833/ENSMUSG00000063531/ENSMUSG00000021994/ENSMUSG00000055254/ENSMUSG00000033174/…	Pdpn/Caprin2/Vim/Plxnd1/Flna/Apoe/Rgma/Rnd2/Akap5/Plxna2/Nin/Dock1/Tubb2b/Agrn/Ssh3/S100a10/Olfm1/Sema3e/Wnt5a/Ntrk2/Mgll/Ptprz1/Efna1/Srcin1/Lrp8/Plxna1/Ptprd/Myadm/Enpp2/Cacna1a/Ptprf/Cul7/Sema6a/Trim46/Chn1/Amigo1/Fn1/Plxnb2/Camk2b/Ccr5/Dmtn/Cux2/Ache/Sema4g/Ttl/Arc/Slit2/Dbn1/Zeb2/Dab1/Nfatc4	51
BP	GO:0001505	regulation of neurotransmitter levels	50|1439	301|16518	6.52503e-06	0.000121763	ENSMUSG00000020932/ENSMUSG00000055368/ENSMUSG00000022037/ENSMUSG00000021557/ENSMUSG00000037405/ENSMUSG00000024087/ENSMUSG00000007655/ENSMUSG00000024827/ENSMUSG00000024935/ENSMUSG00000052336/ENSMUSG00000055447/ENSMUSG00000006764/ENSMUSG00000031596/ENSMUSG00000017978/ENSMUSG00000034462/ENSMUSG00000024397/ENSMUSG00000076441/ENSMUSG00000027995/ENSMUSG00000000290/ENSMUSG00000059714/ENSMUSG00000021071/…	Gfap/Slc6a2/Clu/Agtpbp1/Icam1/Cyp1b1/Cav1/Gldc/Slc1a1/Cx3cr1/Cd47/Tph2/Slc7a2/Cadps2/Pkd2/Aif1/Ass1/Tlr2/Itgb2/Flot1/Trim9/Syngr3/H2-M3/Ntrk2/Tlr4/P2rx7/Ddah1/Slc1a3/Cacna1b/Smad3/Lin7b/Slc6a9/Cacna1a/Ptprn2/Pfn2/Abat/Comt/Rgs4/Tspo/Cd34/Enpp6/Ache/Ptgs2/Camk2a/Unc13c/Arl6ip1/Slc6a1/Slc5a7/Syt11/Snap47	50
BP	GO:0001654	eye development	56|1439	351|16518	6.56875e-06	0.00012201	ENSMUSG00000037225/ENSMUSG00000004040/ENSMUSG00000021557/ENSMUSG00000031502/ENSMUSG00000026728/ENSMUSG00000024087/ENSMUSG00000020467/ENSMUSG00000034394/ENSMUSG00000022656/ENSMUSG00000029231/ENSMUSG00000004891/ENSMUSG00000046768/ENSMUSG00000053279/ENSMUSG00000027168/ENSMUSG00000029838/ENSMUSG00000025921/ENSMUSG00000075012/ENSMUSG00000031283/ENSMUSG00000032060/ENSMUSG00000020122/ENSMUSG00000031517/…	Fgf2/Stat3/Agtpbp1/Col4a1/Vim/Cyp1b1/Efemp1/Lif/Nectin3/Pdgfra/Nes/Rhoj/Aldh1a1/Pax6/Ptn/Rdh10/Fjx1/Chrdl1/Cryab/Egfr/Gpm6a/Mfrp/Sox9/Fbn1/Dll1/Pde6c/Six3/Col5a1/Gas1/Tulp3/Ntrk2/Tgfb2/Hmgb1/Lamb2/Mertk/Tgfbr2/Slc4a5/Neurod4/Smad3/Maf/Six6/Sh3pxd2b/Epha2/Mab21l2/Arl6/Aqp5/Bmp4/Vsx2/Ache/Lama1/Cnga3/Zeb2/Trpm1/Sox2/Ndp/Lrp5	56
BP	GO:0060759	regulation of response to cytokine stimulus	25|1439	110|16518	6.58303e-06	0.00012201	ENSMUSG00000020227/ENSMUSG00000007655/ENSMUSG00000014599/ENSMUSG00000046879/ENSMUSG00000022906/ENSMUSG00000069874/ENSMUSG00000056427/ENSMUSG00000002602/ENSMUSG00000026072/ENSMUSG00000034422/ENSMUSG00000040296/ENSMUSG00000026896/ENSMUSG00000074151/ENSMUSG00000021756/ENSMUSG00000023992/ENSMUSG00000025888/ENSMUSG00000026395/ENSMUSG00000027995/ENSMUSG00000021994/ENSMUSG00000039005/ENSMUSG00000047139/…	Irak3/Cav1/Csf1/Irgm1/Parp9/Irgm2/Slit3/Axl/Il1r1/Parp14/Ddx58/Ifih1/Nlrc5/Il6st/Trem2/Casp1/Ptprc/Tlr2/Wnt5a/Tlr4/Cd24a/Ptprf/Irak1/Irak2/Slit2	25
BP	GO:0042136	neurotransmitter biosynthetic process	22|1439	90|16518	6.69354e-06	0.00012322	ENSMUSG00000022037/ENSMUSG00000037405/ENSMUSG00000024087/ENSMUSG00000007655/ENSMUSG00000052336/ENSMUSG00000055447/ENSMUSG00000006764/ENSMUSG00000031596/ENSMUSG00000034462/ENSMUSG00000024397/ENSMUSG00000076441/ENSMUSG00000000290/ENSMUSG00000016206/ENSMUSG00000039005/ENSMUSG00000028194/ENSMUSG00000005360/ENSMUSG00000032402/ENSMUSG00000057880/ENSMUSG00000041736/ENSMUSG00000016494/ENSMUSG00000032487/…	Clu/Icam1/Cyp1b1/Cav1/Cx3cr1/Cd47/Tph2/Slc7a2/Pkd2/Aif1/Ass1/Itgb2/H2-M3/Tlr4/Ddah1/Slc1a3/Smad3/Abat/Tspo/Cd34/Ptgs2/Slc5a7	22
BP	GO:0045778	positive regulation of ossification	22|1439	90|16518	6.69354e-06	0.00012322	ENSMUSG00000037225/ENSMUSG00000071637/ENSMUSG00000026674/ENSMUSG00000035692/ENSMUSG00000034957/ENSMUSG00000028195/ENSMUSG00000007041/ENSMUSG00000021756/ENSMUSG00000064210/ENSMUSG00000021994/ENSMUSG00000039239/ENSMUSG00000026836/ENSMUSG00000029468/ENSMUSG00000028063/ENSMUSG00000056501/ENSMUSG00000032402/ENSMUSG00000035914/ENSMUSG00000021835/ENSMUSG00000021379/ENSMUSG00000054675/ENSMUSG00000019359/…	Fgf2/Cebpd/Ddr2/Isg15/Cebpa/Cyr61/Clic1/Il6st/Ano6/Wnt5a/Tgfb2/Acvr1/P2rx7/Lmna/Cebpb/Smad3/Cd276/Bmp4/Id4/Tmem119/Gdpd2/Lrp5	22
CC	GO:0005901	caveola	22|1463	92|16707	1.06385e-05	0.000123775	ENSMUSG00000034845/ENSMUSG00000048612/ENSMUSG00000007655/ENSMUSG00000033161/ENSMUSG00000004044/ENSMUSG00000031841/ENSMUSG00000055980/ENSMUSG00000032412/ENSMUSG00000001761/ENSMUSG00000035805/ENSMUSG00000059714/ENSMUSG00000061981/ENSMUSG00000032440/ENSMUSG00000003153/ENSMUSG00000028613/ENSMUSG00000036353/ENSMUSG00000032487/ENSMUSG00000000058/ENSMUSG00000074364/ENSMUSG00000003283/ENSMUSG00000005413/…	Plvap/Myof/Cav1/Atp1a1/Cavin1/Cdh13/Irs1/Atp1b3/Smo/Mlc1/Flot1/Flot2/Tgfbr2/Slc2a3/Lrp8/P2ry12/Ptgs2/Cav2/Ehd2/Hck/Hmox1/Nos1ap	22
CC	GO:0045335	phagocytic vesicle	22|1463	92|16707	1.06385e-05	0.000123775	ENSMUSG00000061232/ENSMUSG00000060802/ENSMUSG00000073411/ENSMUSG00000026728/ENSMUSG00000046879/ENSMUSG00000056515/ENSMUSG00000067212/ENSMUSG00000023460/ENSMUSG00000015243/ENSMUSG00000037321/ENSMUSG00000026177/ENSMUSG00000029860/ENSMUSG00000052688/ENSMUSG00000052160/ENSMUSG00000026879/ENSMUSG00000041598/ENSMUSG00000060550/ENSMUSG00000017774/ENSMUSG00000016534/ENSMUSG00000036943/ENSMUSG00000068923/…	H2-K1/B2m/H2-D1/Vim/Irgm1/Rab31/H2-T23/Rab12/Abca1/Tap1/Slc11a1/Zyx/Rab7b/Pld4/Gsn/Cdc42ep4/H2-Q7/Myo1c/Lamp2/Rab8b/Syt11/Flnb	22
BP	GO:0007204	positive regulation of cytosolic calcium ion concentration	48|1439	285|16518	6.76888e-06	0.000124187	ENSMUSG00000037225/ENSMUSG00000028635/ENSMUSG00000007655/ENSMUSG00000052336/ENSMUSG00000037820/ENSMUSG00000029231/ENSMUSG00000030669/ENSMUSG00000034855/ENSMUSG00000028036/ENSMUSG00000052920/ENSMUSG00000021057/ENSMUSG00000034462/ENSMUSG00000003161/ENSMUSG00000027087/ENSMUSG00000026395/ENSMUSG00000003352/ENSMUSG00000028207/ENSMUSG00000019843/ENSMUSG00000039239/ENSMUSG00000066551/ENSMUSG00000029468/…	Fgf2/Edn2/Cav1/Cx3cr1/Tgm2/Pdgfra/Calca/Cxcl10/Ptgfr/Prkg1/Akap5/Pkd2/Sri/Itgav/Ptprc/Cacnb3/Asph/Fyn/Tgfb2/Hmgb1/P2rx7/Oxtr/Itpr3/Cyba/Cd24a/Plcg1/Cacna1a/Jph1/Tpcn2/Lyn/Plcd1/Ptpn6/Capn3/Cx3cl1/Cacna1g/Ccr5/Ccl28/Bmp4/Gpr157/Cib2/Itpr1/Pth1r/Pik3cg/Tpcn1/Trpm1/Slc8b1/Trpm4/Selenon	48
BP	GO:0007254	JNK cascade	34|1439	175|16518	6.7925e-06	0.000124203	ENSMUSG00000015312/ENSMUSG00000033327/ENSMUSG00000019997/ENSMUSG00000030339/ENSMUSG00000022892/ENSMUSG00000020122/ENSMUSG00000032554/ENSMUSG00000056073/ENSMUSG00000031714/ENSMUSG00000026074/ENSMUSG00000021994/ENSMUSG00000039005/ENSMUSG00000021464/ENSMUSG00000066551/ENSMUSG00000027223/ENSMUSG00000015305/ENSMUSG00000033542/ENSMUSG00000032501/ENSMUSG00000027540/ENSMUSG00000059883/ENSMUSG00000041390/…	Gadd45b/Tnxb/Ctgf/Ltbr/App/Egfr/Trf/Grik2/Gab1/Map4k4/Wnt5a/Tlr4/Ror2/Hmgb1/Mapk8ip1/Sash1/Arhgef5/Trib1/Ptpn1/Irak4/Mdfic/Nod1/Sfrp1/Irak1/Myd88/Dab2ip/Cdc42se1/Vangl2/Map3k5/Tirap/Map3k9/Rassf2/Zeb2/Dact1	34
BP	GO:0046209	nitric oxide metabolic process	19|1439	71|16518	6.86183e-06	0.000125051	ENSMUSG00000022037/ENSMUSG00000037405/ENSMUSG00000024087/ENSMUSG00000007655/ENSMUSG00000052336/ENSMUSG00000055447/ENSMUSG00000031596/ENSMUSG00000034462/ENSMUSG00000024397/ENSMUSG00000076441/ENSMUSG00000027995/ENSMUSG00000000290/ENSMUSG00000016206/ENSMUSG00000039005/ENSMUSG00000028194/ENSMUSG00000032402/ENSMUSG00000041736/ENSMUSG00000016494/ENSMUSG00000032487	Clu/Icam1/Cyp1b1/Cav1/Cx3cr1/Cd47/Slc7a2/Pkd2/Aif1/Ass1/Tlr2/Itgb2/H2-M3/Tlr4/Ddah1/Smad3/Tspo/Cd34/Ptgs2	19
BP	GO:0043547	positive regulation of GTPase activity	54|1439	335|16518	7.03623e-06	0.000127801	ENSMUSG00000036995/ENSMUSG00000037405/ENSMUSG00000070509/ENSMUSG00000026678/ENSMUSG00000037999/ENSMUSG00000038235/ENSMUSG00000058325/ENSMUSG00000057729/ENSMUSG00000041936/ENSMUSG00000022469/ENSMUSG00000029101/ENSMUSG00000041959/ENSMUSG00000004633/ENSMUSG00000028919/ENSMUSG00000028556/ENSMUSG00000050730/ENSMUSG00000021994/ENSMUSG00000001768/ENSMUSG00000035385/ENSMUSG00000071176/ENSMUSG00000021219/…	Asap3/Icam1/Rgma/Rgs5/Arap2/F11r/Dock1/Prtn3/Agrn/Rapgef3/Rgs12/S100a10/Chn2/Arhgef19/Dock7/Arhgap42/Wnt5a/Rin2/Ccl2/Arhgef10/Rgs6/Arhgef5/Nckap1l/Rasal3/Rasa4/Rasa2/Epha2/Erbb2/Ccl12/Adap1/Cx3cl1/Chn1/Itgb1/Dab2ip/Asap2/Arfgap3/Rgs4/Dock2/Arhgap6/Mtss1l/Abr/Net1/Plekhg6/Arhgap23/Cav2/Ccl9/Vav1/Arap3/Itga6/Arhgap8/Rgs17/Rsu1/Tbc1d4/Ophn1	54
CC	GO:0008305	integrin complex	12|1463	33|16707	1.20647e-05	0.00013772	ENSMUSG00000025321/ENSMUSG00000001507/ENSMUSG00000027087/ENSMUSG00000000290/ENSMUSG00000027009/ENSMUSG00000030786/ENSMUSG00000042228/ENSMUSG00000025809/ENSMUSG00000039115/ENSMUSG00000027111/ENSMUSG00000029163/ENSMUSG00000022817	Itgb8/Itga3/Itgav/Itgb2/Itga4/Itgam/Lyn/Itgb1/Itga9/Itga6/Emilin1/Itgb5	12
BP	GO:0051092	positive regulation of NF-kappaB transcription factor activity	26|1439	118|16518	7.90163e-06	0.000143043	ENSMUSG00000022037/ENSMUSG00000037405/ENSMUSG00000020227/ENSMUSG00000024079/ENSMUSG00000052336/ENSMUSG00000022892/ENSMUSG00000027995/ENSMUSG00000000290/ENSMUSG00000021994/ENSMUSG00000039005/ENSMUSG00000052688/ENSMUSG00000052889/ENSMUSG00000059883/ENSMUSG00000026305/ENSMUSG00000038058/ENSMUSG00000031392/ENSMUSG00000079110/ENSMUSG00000032508/ENSMUSG00000031778/ENSMUSG00000060477/ENSMUSG00000021108/…	Clu/Icam1/Irak3/Eif2ak2/Cx3cr1/App/Tlr2/Itgb2/Wnt5a/Tlr4/Rab7b/Prkcb/Irak4/Lrrfip1/Nod1/Irak1/Capn3/Myd88/Cx3cl1/Irak2/Prkch/Mid2/Camk2a/Npm1/Tirap/Prkcq	26
BP	GO:0060760	positive regulation of response to cytokine stimulus	15|1439	48|16518	8.10697e-06	0.000145853	ENSMUSG00000014599/ENSMUSG00000046879/ENSMUSG00000022906/ENSMUSG00000069874/ENSMUSG00000002602/ENSMUSG00000026072/ENSMUSG00000034422/ENSMUSG00000040296/ENSMUSG00000026896/ENSMUSG00000074151/ENSMUSG00000023992/ENSMUSG00000025888/ENSMUSG00000027995/ENSMUSG00000021994/ENSMUSG00000039005	Csf1/Irgm1/Parp9/Irgm2/Axl/Il1r1/Parp14/Ddx58/Ifih1/Nlrc5/Trem2/Casp1/Tlr2/Wnt5a/Tlr4	15
BP	GO:0042089	cytokine biosynthetic process	22|1439	91|16518	8.1104e-06	0.000145853	ENSMUSG00000053175/ENSMUSG00000052336/ENSMUSG00000002325/ENSMUSG00000044786/ENSMUSG00000028163/ENSMUSG00000018899/ENSMUSG00000026395/ENSMUSG00000027718/ENSMUSG00000021994/ENSMUSG00000030124/ENSMUSG00000026946/ENSMUSG00000039005/ENSMUSG00000040152/ENSMUSG00000056501/ENSMUSG00000038058/ENSMUSG00000032508/ENSMUSG00000035914/ENSMUSG00000020919/ENSMUSG00000033208/ENSMUSG00000032041/ENSMUSG00000004043/…	Bcl3/Cx3cr1/Irf9/Zfp36/Nfkb1/Irf1/Ptprc/Il21/Wnt5a/Lag3/Nmi/Tlr4/Thbs1/Cebpb/Nod1/Myd88/Cd276/Stat5b/S100b/Tirap/Stat5a/Prkcq	22
BP	GO:0002573	myeloid leukocyte differentiation	35|1439	184|16518	8.16012e-06	0.000146265	ENSMUSG00000052837/ENSMUSG00000014599/ENSMUSG00000034394/ENSMUSG00000036896/ENSMUSG00000034957/ENSMUSG00000024026/ENSMUSG00000024621/ENSMUSG00000030339/ENSMUSG00000022892/ENSMUSG00000030579/ENSMUSG00000037465/ENSMUSG00000032554/ENSMUSG00000057729/ENSMUSG00000027204/ENSMUSG00000023992/ENSMUSG00000035673/ENSMUSG00000046402/ENSMUSG00000021464/ENSMUSG00000040274/ENSMUSG00000027878/ENSMUSG00000022952/…	Junb/Csf1/Lif/C1qc/Cebpa/Glo1/Csf1r/Ltbr/App/Tyrobp/Klf10/Trf/Prtn3/Fbn1/Trem2/Sbno2/Rbp1/Ror2/Cdk6/Notch2/Runx1/Tgfbr2/Trib1/Anxa2/Cebpb/Zfp36l1/Lyn/Epha2/Sfrp1/Bmp4/Kitl/Fcer1g/Gab2/Stat5a/Rassf2	35
CC	GO:0005581	collagen trimer	20|1463	80|16707	1.30812e-05	0.000146558	ENSMUSG00000029718/ENSMUSG00000031502/ENSMUSG00000033327/ENSMUSG00000036905/ENSMUSG00000036887/ENSMUSG00000036896/ENSMUSG00000034463/ENSMUSG00000058897/ENSMUSG00000022483/ENSMUSG00000031273/ENSMUSG00000026837/ENSMUSG00000028339/ENSMUSG00000031274/ENSMUSG00000034164/ENSMUSG00000029661/ENSMUSG00000063564/ENSMUSG00000029163/ENSMUSG00000036907/ENSMUSG00000031503/ENSMUSG00000027966	Pcolce/Col4a1/Tnxb/C1qb/C1qa/C1qc/Scara3/Col25a1/Col2a1/Col4a6/Col5a1/Col15a1/Col4a5/Emid1/Col1a2/Col23a1/Emilin1/C1ql2/Col4a2/Col11a1	20
BP	GO:0008016	regulation of heart contraction	33|1439	169|16518	8.25507e-06	0.000147482	ENSMUSG00000028635/ENSMUSG00000026414/ENSMUSG00000007655/ENSMUSG00000019997/ENSMUSG00000024935/ENSMUSG00000031328/ENSMUSG00000030669/ENSMUSG00000019789/ENSMUSG00000033161/ENSMUSG00000044080/ENSMUSG00000052920/ENSMUSG00000015968/ENSMUSG00000003161/ENSMUSG00000010066/ENSMUSG00000041936/ENSMUSG00000053965/ENSMUSG00000011751/ENSMUSG00000039239/ENSMUSG00000062373/ENSMUSG00000030409/ENSMUSG00000090122/…	Edn2/Tnnt2/Cav1/Ctgf/Slc1a1/Flna/Calca/Hey2/Atp1a1/S100a1/Prkg1/Cacna1d/Sri/Cacna2d2/Agrn/Pde5a/Sptbn4/Tgfb2/Tmem65/Dmpk/Kcne1l/Cacna1b/Thra/Kcna5/Cacna1g/Adora1/Rgs4/Jup/Scn3b/Spx/Trpm4/Nos1ap/Pde4b	33
BP	GO:0002262	myeloid cell homeostasis	30|1439	147|16518	8.45837e-06	0.00015062	ENSMUSG00000004040/ENSMUSG00000060802/ENSMUSG00000022508/ENSMUSG00000002602/ENSMUSG00000035692/ENSMUSG00000044786/ENSMUSG00000024659/ENSMUSG00000026104/ENSMUSG00000040274/ENSMUSG00000066551/ENSMUSG00000014361/ENSMUSG00000035385/ENSMUSG00000022488/ENSMUSG00000058756/ENSMUSG00000047139/ENSMUSG00000051910/ENSMUSG00000021127/ENSMUSG00000042228/ENSMUSG00000034201/ENSMUSG00000020919/ENSMUSG00000022099/…	Stat3/B2m/Bcl6/Axl/Isg15/Zfp36/Anxa1/Stat1/Cdk6/Hmgb1/Mertk/Ccl2/Nckap1l/Thra/Cd24a/Sox6/Zfp36l1/Lyn/Gas2l1/Stat5b/Dmtn/Bmp4/Kitl/Jam3/Fcer1g/Stat5a/Hmox1/Ikzf1/Sfxn1/Pde4b	30
BP	GO:0003012	muscle system process	56|1439	354|16518	8.51133e-06	0.000151069	ENSMUSG00000028635/ENSMUSG00000026414/ENSMUSG00000026923/ENSMUSG00000030341/ENSMUSG00000035200/ENSMUSG00000007655/ENSMUSG00000019997/ENSMUSG00000016918/ENSMUSG00000031328/ENSMUSG00000028599/ENSMUSG00000034810/ENSMUSG00000030669/ENSMUSG00000026185/ENSMUSG00000019789/ENSMUSG00000033161/ENSMUSG00000064179/ENSMUSG00000006800/ENSMUSG00000052920/ENSMUSG00000015968/ENSMUSG00000003161/ENSMUSG00000041936/…	Edn2/Tnnt2/Notch1/Tnfrsf1a/Chrnb4/Cav1/Ctgf/Sulf1/Flna/Tnfrsf1b/Scn7a/Calca/Igfbp5/Hey2/Atp1a1/Tnnt1/Sulf2/Prkg1/Cacna1d/Sri/Agrn/Aif1/Pde5a/Arhgap42/Grip2/Sorbs2/Lmna/Rock2/Oxtr/Inpp5f/Dmpk/Kcne1l/Cyba/Smad3/Kcna5/Ptgs1/Trim72/Tpcn2/Gsn/Anxa6/Abat/Cacna1g/Abcc8/Adora1/Rgs4/Scn1a/Ptgs2/Npm1/Jup/Dbn1/Camk2g/Scn3b/Spx/Trpm4/Gucy1a1/Pde4b	56
BP	GO:0051493	regulation of cytoskeleton organization	72|1439	493|16518	8.77864e-06	0.000155308	ENSMUSG00000036995/ENSMUSG00000037405/ENSMUSG00000007655/ENSMUSG00000020388/ENSMUSG00000021701/ENSMUSG00000019997/ENSMUSG00000037736/ENSMUSG00000031328/ENSMUSG00000043079/ENSMUSG00000048537/ENSMUSG00000004891/ENSMUSG00000038235/ENSMUSG00000040811/ENSMUSG00000024621/ENSMUSG00000026509/ENSMUSG00000046718/ENSMUSG00000001313/ENSMUSG00000029622/ENSMUSG00000021068/ENSMUSG00000023249/ENSMUSG00000032194/…	Asap3/Icam1/Cav1/Pdlim4/Plk2/Ctgf/Limch1/Flna/Synpo/Phldb1/Nes/F11r/Eml2/Csf1r/Capn2/Bst2/Rnd2/Arpc1b/Nin/Parp3/Kank2/Iqgap2/Mapre1/Agrn/Ssh3/Cetn4/Rapgef3/Rhoc/S100a10/Arhgef19/Sema3e/Sptbn4/Tgfb2/Capg/Plek/Rnd3/Rock2/Slc39a12/Arhgef10/Arhgef5/Syde1/Nckap1l/Smad3/Espn/Myadm/Sh3pxd2b/Gsn/Cdc42ep4/Stmn2/Gas2l1/Pfn2/Cx3cl1/Gnai1/Dmtn/Tmeff2/Rgs4/Arhgap6/Jam3/Vangl2/Myo1c/Clip3/Plekhh2/Arpin/Npm1/Sp…	72
BP	GO:0006809	nitric oxide biosynthetic process	18|1439	66|16518	8.92738e-06	0.000157428	ENSMUSG00000022037/ENSMUSG00000037405/ENSMUSG00000024087/ENSMUSG00000007655/ENSMUSG00000052336/ENSMUSG00000055447/ENSMUSG00000031596/ENSMUSG00000034462/ENSMUSG00000024397/ENSMUSG00000076441/ENSMUSG00000000290/ENSMUSG00000016206/ENSMUSG00000039005/ENSMUSG00000028194/ENSMUSG00000032402/ENSMUSG00000041736/ENSMUSG00000016494/ENSMUSG00000032487	Clu/Icam1/Cyp1b1/Cav1/Cx3cr1/Cd47/Slc7a2/Pkd2/Aif1/Ass1/Itgb2/H2-M3/Tlr4/Ddah1/Smad3/Tspo/Cd34/Ptgs2	18
BP	GO:0032649	regulation of interferon-gamma production	21|1439	85|16518	9.01742e-06	0.000158454	ENSMUSG00000053175/ENSMUSG00000055447/ENSMUSG00000002602/ENSMUSG00000026072/ENSMUSG00000035692/ENSMUSG00000024810/ENSMUSG00000027718/ENSMUSG00000041515/ENSMUSG00000026177/ENSMUSG00000021994/ENSMUSG00000001123/ENSMUSG00000016206/ENSMUSG00000039005/ENSMUSG00000066551/ENSMUSG00000042258/ENSMUSG00000016496/ENSMUSG00000035914/ENSMUSG00000020101/ENSMUSG00000022378/ENSMUSG00000037447/ENSMUSG00000028525	Bcl3/Cd47/Axl/Il1r1/Isg15/Il33/Il21/Irf8/Slc11a1/Wnt5a/Lgals9/H2-M3/Tlr4/Hmgb1/Isl1/Cd274/Cd276/Vsir/Fam49b/Arid5a/Pde4b	21
BP	GO:0042133	neurotransmitter metabolic process	28|1439	133|16518	9.04373e-06	0.000158454	ENSMUSG00000022037/ENSMUSG00000021557/ENSMUSG00000037405/ENSMUSG00000024087/ENSMUSG00000007655/ENSMUSG00000024827/ENSMUSG00000052336/ENSMUSG00000055447/ENSMUSG00000006764/ENSMUSG00000031596/ENSMUSG00000034462/ENSMUSG00000024397/ENSMUSG00000076441/ENSMUSG00000027995/ENSMUSG00000000290/ENSMUSG00000016206/ENSMUSG00000039005/ENSMUSG00000028194/ENSMUSG00000005360/ENSMUSG00000032402/ENSMUSG00000057880/…	Clu/Agtpbp1/Icam1/Cyp1b1/Cav1/Gldc/Cx3cr1/Cd47/Tph2/Slc7a2/Pkd2/Aif1/Ass1/Tlr2/Itgb2/H2-M3/Tlr4/Ddah1/Slc1a3/Smad3/Abat/Comt/Tspo/Cd34/Enpp6/Ache/Ptgs2/Slc5a7	28
CC	GO:0044448	cell cortex part	32|1463	165|16707	1.44677e-05	0.000159144	ENSMUSG00000049493/ENSMUSG00000031328/ENSMUSG00000048537/ENSMUSG00000018398/ENSMUSG00000034462/ENSMUSG00000027479/ENSMUSG00000022469/ENSMUSG00000059714/ENSMUSG00000011751/ENSMUSG00000028207/ENSMUSG00000061981/ENSMUSG00000028005/ENSMUSG00000027940/ENSMUSG00000068566/ENSMUSG00000022456/ENSMUSG00000026879/ENSMUSG00000047547/ENSMUSG00000020173/ENSMUSG00000057614/ENSMUSG00000021281/ENSMUSG00000022099/…	Pls1/Flna/Phldb1/Sept8/Pkd2/Mapre1/Rapgef3/Flot1/Sptbn4/Asph/Flot2/Gucy1b1/Tpm3/Myadm/Sept3/Gsn/Cltb/Cobl/Gnai1/Tnfaip2/Dmtn/Mtss1l/Sept9/Sept5/Cib2/Tpm4/Plekhh2/Erc1/Cap2/Unc13c/Lasp1/Ctsz	32
BP	GO:0032946	positive regulation of mononuclear cell proliferation	26|1439	119|16518	9.28509e-06	0.000162162	ENSMUSG00000022508/ENSMUSG00000027962/ENSMUSG00000014599/ENSMUSG00000067212/ENSMUSG00000024659/ENSMUSG00000021756/ENSMUSG00000024397/ENSMUSG00000026395/ENSMUSG00000027718/ENSMUSG00000039005/ENSMUSG00000040663/ENSMUSG00000066551/ENSMUSG00000032440/ENSMUSG00000016496/ENSMUSG00000022488/ENSMUSG00000052142/ENSMUSG00000047139/ENSMUSG00000047810/ENSMUSG00000032508/ENSMUSG00000035914/ENSMUSG00000020919/…	Bcl6/Vcam1/Csf1/H2-T23/Anxa1/Il6st/Aif1/Ptprc/Il21/Tlr4/Clcf1/Hmgb1/Tgfbr2/Cd274/Nckap1l/Rasal3/Cd24a/Ccdc88b/Myd88/Cd276/Stat5b/Efnb1/Cdkn1a/Stat5a/Prkcq/Cd86	26
BP	GO:0007229	integrin-mediated signaling pathway	22|1439	92|16518	9.79343e-06	0.00016995	ENSMUSG00000019997/ENSMUSG00000031328/ENSMUSG00000025321/ENSMUSG00000001507/ENSMUSG00000025351/ENSMUSG00000015647/ENSMUSG00000030579/ENSMUSG00000001131/ENSMUSG00000027087/ENSMUSG00000000290/ENSMUSG00000027009/ENSMUSG00000030786/ENSMUSG00000020120/ENSMUSG00000029860/ENSMUSG00000025809/ENSMUSG00000022099/ENSMUSG00000037493/ENSMUSG00000039115/ENSMUSG00000058715/ENSMUSG00000034116/ENSMUSG00000027111/…	Ctgf/Flna/Itgb8/Itga3/Cd63/Lama5/Tyrobp/Timp1/Itgav/Itgb2/Itga4/Itgam/Plek/Zyx/Itgb1/Dmtn/Cib2/Itga9/Fcer1g/Vav1/Itga6/Itgb5	22
BP	GO:0042107	cytokine metabolic process	22|1439	92|16518	9.79343e-06	0.00016995	ENSMUSG00000053175/ENSMUSG00000052336/ENSMUSG00000002325/ENSMUSG00000044786/ENSMUSG00000028163/ENSMUSG00000018899/ENSMUSG00000026395/ENSMUSG00000027718/ENSMUSG00000021994/ENSMUSG00000030124/ENSMUSG00000026946/ENSMUSG00000039005/ENSMUSG00000040152/ENSMUSG00000056501/ENSMUSG00000038058/ENSMUSG00000032508/ENSMUSG00000035914/ENSMUSG00000020919/ENSMUSG00000033208/ENSMUSG00000032041/ENSMUSG00000004043/…	Bcl3/Cx3cr1/Irf9/Zfp36/Nfkb1/Irf1/Ptprc/Il21/Wnt5a/Lag3/Nmi/Tlr4/Thbs1/Cebpb/Nod1/Myd88/Cd276/Stat5b/S100b/Tirap/Stat5a/Prkcq	22
BP	GO:0070482	response to oxygen levels	54|1439	339|16518	1.00052e-05	0.000173075	ENSMUSG00000026923/ENSMUSG00000032648/ENSMUSG00000036880/ENSMUSG00000007655/ENSMUSG00000019997/ENSMUSG00000027962/ENSMUSG00000000957/ENSMUSG00000019982/ENSMUSG00000029838/ENSMUSG00000028255/ENSMUSG00000031538/ENSMUSG00000026509/ENSMUSG00000032060/ENSMUSG00000033685/ENSMUSG00000024620/ENSMUSG00000025888/ENSMUSG00000027995/ENSMUSG00000032374/ENSMUSG00000024778/ENSMUSG00000003352/ENSMUSG00000039239/…	Notch1/Pygm/Acaa2/Cav1/Ctgf/Vcam1/Mmp14/Myb/Ptn/Clca1/Plat/Capn2/Cryab/Ucp2/Pdgfrb/Casp1/Tlr2/Plod2/Fas/Cacnb3/Tgfb2/Tgfbr2/Ddah1/Lmna/Ccl2/Oxtr/Dnmt3b/Cyba/Smad3/Cd24a/Tgfbr3/Kcna5/Zfp36l1/Ajuba/Sfrp1/Irak1/Abat/Cpeb2/Limd1/Cygb/Adora1/Cd34/Sod3/Fosl2/Itpr1/S100b/Ptgs2/Npm1/Cdkn1a/Ndnf/Ang/Camk2g/Hmox1/Kcnk3	54
BP	GO:0036293	response to decreased oxygen levels	51|1439	314|16518	1.01163e-05	0.000174443	ENSMUSG00000026923/ENSMUSG00000032648/ENSMUSG00000036880/ENSMUSG00000007655/ENSMUSG00000019997/ENSMUSG00000027962/ENSMUSG00000000957/ENSMUSG00000019982/ENSMUSG00000029838/ENSMUSG00000028255/ENSMUSG00000031538/ENSMUSG00000026509/ENSMUSG00000032060/ENSMUSG00000033685/ENSMUSG00000025888/ENSMUSG00000027995/ENSMUSG00000032374/ENSMUSG00000003352/ENSMUSG00000039239/ENSMUSG00000032440/ENSMUSG00000028194/…	Notch1/Pygm/Acaa2/Cav1/Ctgf/Vcam1/Mmp14/Myb/Ptn/Clca1/Plat/Capn2/Cryab/Ucp2/Casp1/Tlr2/Plod2/Cacnb3/Tgfb2/Tgfbr2/Ddah1/Lmna/Ccl2/Oxtr/Dnmt3b/Cyba/Smad3/Cd24a/Tgfbr3/Kcna5/Zfp36l1/Ajuba/Sfrp1/Irak1/Abat/Cpeb2/Limd1/Cygb/Adora1/Cd34/Sod3/Fosl2/Itpr1/S100b/Ptgs2/Npm1/Ndnf/Ang/Camk2g/Hmox1/Kcnk3	51
BP	GO:1904951	positive regulation of establishment of protein localization	61|1439	399|16518	1.029e-05	0.000176877	ENSMUSG00000030341/ENSMUSG00000031328/ENSMUSG00000040296/ENSMUSG00000026896/ENSMUSG00000067212/ENSMUSG00000024810/ENSMUSG00000024621/ENSMUSG00000030662/ENSMUSG00000021057/ENSMUSG00000015968/ENSMUSG00000020122/ENSMUSG00000031075/ENSMUSG00000003161/ENSMUSG00000022469/ENSMUSG00000001761/ENSMUSG00000025888/ENSMUSG00000027995/ENSMUSG00000002897/ENSMUSG00000026589/ENSMUSG00000003352/ENSMUSG00000021994/…	Tnfrsf1a/Flna/Ddx58/Ifih1/H2-T23/Il33/Csf1r/Ipo5/Akap5/Cacna1d/Egfr/Ano1/Sri/Rapgef3/Smo/Casp1/Tlr2/Il17ra/Sec16b/Cacnb3/Wnt5a/Asph/Lgals9/Fyn/Tgfb2/Oxct1/Tlr4/Bag3/Cyp2j6/Hmgb1/P2rx7/Isl1/Ccl2/Arhgef5/Cd274/Acsl3/Ezr/Wls/Erbb2/Lrp1/Cd300c2/Prr5l/Abat/Cd276/Ccr5/Camk1/Cd34/Zic1/Rapgef4/Myo1c/Vsnl1/Tmem173/Ptgs2/Jup/Ang/Arid5a/Sybu/Prkcq/Trpm4/Il17rc/Tcaf2	61
BP	GO:0090288	negative regulation of cellular response to growth factor stimulus	27|1439	127|16518	1.07493e-05	0.000184191	ENSMUSG00000026923/ENSMUSG00000007655/ENSMUSG00000016918/ENSMUSG00000050069/ENSMUSG00000031283/ENSMUSG00000044674/ENSMUSG00000041120/ENSMUSG00000006800/ENSMUSG00000037211/ENSMUSG00000031486/ENSMUSG00000027204/ENSMUSG00000021994/ENSMUSG00000027540/ENSMUSG00000040152/ENSMUSG00000029287/ENSMUSG00000032387/ENSMUSG00000029096/ENSMUSG00000033295/ENSMUSG00000019647/ENSMUSG00000031548/ENSMUSG00000038400/…	Notch1/Cav1/Sulf1/Grem2/Chrdl1/Fzd1/Nbl1/Sulf2/Spry1/Adgra2/Fbn1/Wnt5a/Ptpn1/Thbs1/Tgfbr3/Rbpms2/Htra3/Ptprf/Sema6a/Sfrp1/Pmepa1/Bcl9l/Dab2ip/Onecut2/Cav2/Slit2/Emilin1	27
BP	GO:0002367	cytokine production involved in immune response	21|1439	86|16518	1.09632e-05	0.000187268	ENSMUSG00000060802/ENSMUSG00000020227/ENSMUSG00000022508/ENSMUSG00000020641/ENSMUSG00000026072/ENSMUSG00000040296/ENSMUSG00000046718/ENSMUSG00000027995/ENSMUSG00000027718/ENSMUSG00000026177/ENSMUSG00000021994/ENSMUSG00000039239/ENSMUSG00000039005/ENSMUSG00000043496/ENSMUSG00000008734/ENSMUSG00000026471/ENSMUSG00000058715/ENSMUSG00000020101/ENSMUSG00000037447/ENSMUSG00000005413/ENSMUSG00000038260	B2m/Irak3/Bcl6/Rsad2/Il1r1/Ddx58/Bst2/Tlr2/Il21/Slc11a1/Wnt5a/Tgfb2/Tlr4/Tril/Gprc5b/Mr1/Fcer1g/Vsir/Arid5a/Hmox1/Trpm4	21
BP	GO:0070302	regulation of stress-activated protein kinase signaling cascade	37|1439	202|16518	1.11836e-05	0.000190435	ENSMUSG00000015312/ENSMUSG00000033327/ENSMUSG00000019997/ENSMUSG00000024079/ENSMUSG00000030339/ENSMUSG00000022892/ENSMUSG00000020122/ENSMUSG00000032554/ENSMUSG00000056073/ENSMUSG00000031714/ENSMUSG00000026074/ENSMUSG00000024778/ENSMUSG00000021994/ENSMUSG00000039239/ENSMUSG00000039005/ENSMUSG00000021464/ENSMUSG00000066551/ENSMUSG00000027223/ENSMUSG00000015305/ENSMUSG00000033542/ENSMUSG00000027540/…	Gadd45b/Tnxb/Ctgf/Eif2ak2/Ltbr/App/Egfr/Trf/Grik2/Gab1/Map4k4/Fas/Wnt5a/Tgfb2/Tlr4/Ror2/Hmgb1/Mapk8ip1/Sash1/Arhgef5/Ptpn1/Ezr/Mdfic/Lyn/Nod1/Sfrp1/Irak1/Myd88/Dab2ip/Cdc42se1/Vangl2/Map3k5/Tirap/Map3k9/Rassf2/Zeb2/Dact1	37
BP	GO:0014002	astrocyte development	11|1439	28|16518	1.12418e-05	0.00019083	ENSMUSG00000020932/ENSMUSG00000026728/ENSMUSG00000022892/ENSMUSG00000020122/ENSMUSG00000014773/ENSMUSG00000001761/ENSMUSG00000039005/ENSMUSG00000021464/ENSMUSG00000052911/ENSMUSG00000040249/ENSMUSG00000015599	Gfap/Vim/App/Egfr/Dll1/Smo/Tlr4/Ror2/Lamb2/Lrp1/Ttbk1	11
BP	GO:0046328	regulation of JNK cascade	32|1439	164|16518	1.14301e-05	0.000193424	ENSMUSG00000015312/ENSMUSG00000033327/ENSMUSG00000019997/ENSMUSG00000030339/ENSMUSG00000022892/ENSMUSG00000020122/ENSMUSG00000032554/ENSMUSG00000056073/ENSMUSG00000031714/ENSMUSG00000026074/ENSMUSG00000021994/ENSMUSG00000039005/ENSMUSG00000021464/ENSMUSG00000066551/ENSMUSG00000027223/ENSMUSG00000015305/ENSMUSG00000033542/ENSMUSG00000027540/ENSMUSG00000041390/ENSMUSG00000038058/ENSMUSG00000031548/…	Gadd45b/Tnxb/Ctgf/Ltbr/App/Egfr/Trf/Grik2/Gab1/Map4k4/Wnt5a/Tlr4/Ror2/Hmgb1/Mapk8ip1/Sash1/Arhgef5/Ptpn1/Mdfic/Nod1/Sfrp1/Irak1/Myd88/Dab2ip/Cdc42se1/Vangl2/Map3k5/Tirap/Map3k9/Rassf2/Zeb2/Dact1	32
CC	GO:0016324	apical plasma membrane	51|1463	319|16707	1.82052e-05	0.000196681	ENSMUSG00000022146/ENSMUSG00000026923/ENSMUSG00000005087/ENSMUSG00000028583/ENSMUSG00000007655/ENSMUSG00000024935/ENSMUSG00000031207/ENSMUSG00000026674/ENSMUSG00000030342/ENSMUSG00000024659/ENSMUSG00000033161/ENSMUSG00000046718/ENSMUSG00000030737/ENSMUSG00000015968/ENSMUSG00000020122/ENSMUSG00000031075/ENSMUSG00000032554/ENSMUSG00000034739/ENSMUSG00000001827/ENSMUSG00000014773/ENSMUSG00000024620/…	Osmr/Notch1/Cd44/Pdpn/Cav1/Slc1a1/Msn/Ddr2/Cd9/Anxa1/Atp1a1/Bst2/Slco2b1/Cacna1d/Egfr/Ano1/Trf/Mfrp/Folr1/Dll1/Pdgfrb/Mlc1/Mal/Fas/Cacnb3/Pard3b/Sorbs2/Oxtr/Cyba/Kcna5/Ezr/Erbb2/Nod1/Anxa6/Fn1/Aqp5/Cd34/Rapgef4/Scnn1a/Vangl2/Ajap1/Anxa4/Abcg2/Kcnk1/Itpk1/Pth1r/Ripor2/Slc5a7/Fzd6/Abcb1b/Amotl1	51
BP	GO:0060041	retina development in camera-type eye	29|1439	142|16518	1.17147e-05	0.000197627	ENSMUSG00000021557/ENSMUSG00000031502/ENSMUSG00000024087/ENSMUSG00000034394/ENSMUSG00000022656/ENSMUSG00000029231/ENSMUSG00000046768/ENSMUSG00000027168/ENSMUSG00000029838/ENSMUSG00000075012/ENSMUSG00000031517/ENSMUSG00000034739/ENSMUSG00000000567/ENSMUSG00000014773/ENSMUSG00000024992/ENSMUSG00000038805/ENSMUSG00000055254/ENSMUSG00000039239/ENSMUSG00000052911/ENSMUSG00000014361/ENSMUSG00000068323/…	Agtpbp1/Col4a1/Cyp1b1/Lif/Nectin3/Pdgfra/Rhoj/Pax6/Ptn/Fjx1/Gpm6a/Mfrp/Sox9/Dll1/Pde6c/Six3/Ntrk2/Tgfb2/Lamb2/Mertk/Slc4a5/Neurod4/Arl6/Vsx2/Ache/Lama1/Cnga3/Ndp/Lrp5	29
BP	GO:0003176	aortic valve development	8|1439	15|16518	1.19863e-05	0.000200964	ENSMUSG00000026923/ENSMUSG00000030341/ENSMUSG00000028599/ENSMUSG00000056427/ENSMUSG00000027954/ENSMUSG00000021835/ENSMUSG00000031558/ENSMUSG00000029163	Notch1/Tnfrsf1a/Tnfrsf1b/Slit3/Efna1/Bmp4/Slit2/Emilin1	8
BP	GO:0034134	toll-like receptor 2 signaling pathway	8|1439	15|16518	1.19863e-05	0.000200964	ENSMUSG00000027995/ENSMUSG00000066551/ENSMUSG00000006519/ENSMUSG00000059866/ENSMUSG00000042228/ENSMUSG00000025017/ENSMUSG00000031392/ENSMUSG00000032041	Tlr2/Hmgb1/Cyba/Tnip2/Lyn/Pik3ap1/Irak1/Tirap	8
BP	GO:0014031	mesenchymal cell development	20|1439	80|16518	1.21122e-05	0.000202452	ENSMUSG00000026923/ENSMUSG00000027168/ENSMUSG00000025921/ENSMUSG00000019789/ENSMUSG00000015647/ENSMUSG00000000567/ENSMUSG00000001827/ENSMUSG00000001761/ENSMUSG00000063531/ENSMUSG00000026836/ENSMUSG00000042258/ENSMUSG00000062432/ENSMUSG00000019647/ENSMUSG00000018340/ENSMUSG00000031217/ENSMUSG00000026193/ENSMUSG00000021835/ENSMUSG00000019966/ENSMUSG00000025207/ENSMUSG00000026872	Notch1/Pax6/Rdh10/Hey2/Lama5/Sox9/Folr1/Smo/Sema3e/Acvr1/Isl1/Cyp26c1/Sema6a/Anxa6/Efnb1/Fn1/Bmp4/Kitl/Sema4g/Zeb2	20
BP	GO:0000082	G1/S transition of mitotic cell cycle	31|1439	157|16518	1.21537e-05	0.000202525	ENSMUSG00000057469/ENSMUSG00000028583/ENSMUSG00000022893/ENSMUSG00000021701/ENSMUSG00000041498/ENSMUSG00000019982/ENSMUSG00000024659/ENSMUSG00000020122/ENSMUSG00000034462/ENSMUSG00000032194/ENSMUSG00000024397/ENSMUSG00000040479/ENSMUSG00000000184/ENSMUSG00000026932/ENSMUSG00000026836/ENSMUSG00000047409/ENSMUSG00000022216/ENSMUSG00000045534/ENSMUSG00000023092/ENSMUSG00000017412/ENSMUSG00000035352/…	E2f6/Pdpn/Adamts1/Plk2/Kif14/Myb/Anxa1/Egfr/Pkd2/Kank2/Aif1/Dgkz/Ccnd2/Nacc2/Acvr1/Ctdspl/Psme1/Kcna5/Fhl1/Cacnb4/Ccl12/Ptpn6/Itgb1/Camk2b/Klf11/Id4/Camk2a/Ctdsp1/Cdkn1a/Camk2g/Dact1	31
BP	GO:0010718	positive regulation of epithelial to mesenchymal transition	14|1439	44|16518	1.28332e-05	0.000212548	ENSMUSG00000026923/ENSMUSG00000028583/ENSMUSG00000027803/ENSMUSG00000028480/ENSMUSG00000026833/ENSMUSG00000028249/ENSMUSG00000039239/ENSMUSG00000026836/ENSMUSG00000032440/ENSMUSG00000042258/ENSMUSG00000032402/ENSMUSG00000063382/ENSMUSG00000021835/ENSMUSG00000021360	Notch1/Pdpn/Wwtr1/Glipr2/Olfm1/Sdcbp/Tgfb2/Acvr1/Tgfbr2/Isl1/Smad3/Bcl9l/Bmp4/Gcnt2	14
BP	GO:0035456	response to interferon-beta	14|1439	44|16518	1.28332e-05	0.000212548	ENSMUSG00000028270/ENSMUSG00000034459/ENSMUSG00000074896/ENSMUSG00000028268/ENSMUSG00000025492/ENSMUSG00000046879/ENSMUSG00000069874/ENSMUSG00000104713/ENSMUSG00000040483/ENSMUSG00000018899/ENSMUSG00000026104/ENSMUSG00000046718/ENSMUSG00000078853/ENSMUSG00000024349	Gbp2/Ifit1/Ifit3/Gbp3/Ifitm3/Irgm1/Irgm2/Gbp6/Xaf1/Irf1/Stat1/Bst2/Igtp/Tmem173	14
BP	GO:0016049	cell growth	69|1439	472|16518	1.30219e-05	0.000215019	ENSMUSG00000030309/ENSMUSG00000022508/ENSMUSG00000019997/ENSMUSG00000003534/ENSMUSG00000002985/ENSMUSG00000000957/ENSMUSG00000056427/ENSMUSG00000070509/ENSMUSG00000041498/ENSMUSG00000026185/ENSMUSG00000028195/ENSMUSG00000046718/ENSMUSG00000001313/ENSMUSG00000052920/ENSMUSG00000022892/ENSMUSG00000032060/ENSMUSG00000021068/ENSMUSG00000020122/ENSMUSG00000000567/ENSMUSG00000001761/ENSMUSG00000026833/…	Caprin2/Bcl6/Ctgf/Ddr1/Apoe/Mmp14/Slit3/Rgma/Kif14/Igfbp5/Cyr61/Bst2/Rnd2/Prkg1/App/Cryab/Nin/Egfr/Sox9/Smo/Olfm1/Gas1/Prdm11/Sema3e/Sdcbp/Itga4/Wnt5a/Fbln5/Tgfb2/Mgll/Ptprj/Sorbs2/Lamb2/Tgfbr2/Frzb/Cyba/Plxna1/Smad3/P3h1/Flrt3/Osgin1/Fhl1/Dact3/Htra3/Erbb2/Sema6a/Sfrp1/Gas2l1/Trim46/Fn1/Cobl/Itgb1/Dab2ip/Ccr5/Taf9b/Rgs4/Socs2/Rims1/Sh3bp4/Sema4g/Ttl/Slc9a6/Npm1/Slit2/Cdkn1a/Dbn1/Igfbp6/Zeb2/Serp…	69
BP	GO:0045666	positive regulation of neuron differentiation	62|1439	411|16518	1.33631e-05	0.000219986	ENSMUSG00000030309/ENSMUSG00000022893/ENSMUSG00000031565/ENSMUSG00000022508/ENSMUSG00000030123/ENSMUSG00000034394/ENSMUSG00000002985/ENSMUSG00000001507/ENSMUSG00000070509/ENSMUSG00000017466/ENSMUSG00000006435/ENSMUSG00000027168/ENSMUSG00000029838/ENSMUSG00000044674/ENSMUSG00000041120/ENSMUSG00000001313/ENSMUSG00000021057/ENSMUSG00000026640/ENSMUSG00000021068/ENSMUSG00000045136/ENSMUSG00000023972/…	Caprin2/Adamts1/Fgfr1/Bcl6/Plxnd1/Lif/Apoe/Itga3/Rgma/Timp2/Neurl1a/Pax6/Ptn/Fzd1/Nbl1/Rnd2/Akap5/Plxna2/Nin/Tubb2b/Ptk7/Wnt5a/Fyn/Ntrk2/Bend6/Ptprz1/Gprc5b/Rgs6/Lrp8/Dnmt3b/Plppr5/Plxna1/P3h1/Cd24a/Ptprd/Lyn/Ptprf/Cul7/Stmn2/Cx3cl1/Amigo1/Fn1/Plxnb2/Cobl/Itgb1/Camk2b/Dab2ip/Ccr5/Tcf4/Bmp4/Camk1/Socs2/Rims1/Cux2/Ache/Fez1/Ndnf/Dbn1/Brinp3/Zeb2/Serpine2/Dab1	62
BP	GO:0045807	positive regulation of endocytosis	29|1439	143|16518	1.3492e-05	0.000221439	ENSMUSG00000022037/ENSMUSG00000060802/ENSMUSG00000007655/ENSMUSG00000022912/ENSMUSG00000055447/ENSMUSG00000002985/ENSMUSG00000002602/ENSMUSG00000025351/ENSMUSG00000032554/ENSMUSG00000064210/ENSMUSG00000014773/ENSMUSG00000026395/ENSMUSG00000059714/ENSMUSG00000026177/ENSMUSG00000021994/ENSMUSG00000014361/ENSMUSG00000035385/ENSMUSG00000032231/ENSMUSG00000022488/ENSMUSG00000006519/ENSMUSG00000025510/…	Clu/B2m/Cav1/Pros1/Cd47/Apoe/Axl/Cd63/Trf/Ano6/Dll1/Ptprc/Flot1/Slc11a1/Wnt5a/Mertk/Ccl2/Anxa2/Nckap1l/Cyba/Cd151/C3/Lrp1/Itgb1/Dock2/Abr/Gm6970/Fcer1g/Clip3	29
BP	GO:0071496	cellular response to external stimulus	50|1439	309|16518	1.36726e-05	0.000223729	ENSMUSG00000030341/ENSMUSG00000007655/ENSMUSG00000024079/ENSMUSG00000002602/ENSMUSG00000020407/ENSMUSG00000028163/ENSMUSG00000029838/ENSMUSG00000018899/ENSMUSG00000030339/ENSMUSG00000026628/ENSMUSG00000033161/ENSMUSG00000017978/ENSMUSG00000037465/ENSMUSG00000020122/ENSMUSG00000032194/ENSMUSG00000024397/ENSMUSG00000000567/ENSMUSG00000001827/ENSMUSG00000004665/ENSMUSG00000022462/ENSMUSG00000033685/…	Tnfrsf1a/Cav1/Eif2ak2/Axl/Upp1/Nfkb1/Ptn/Irf1/Ltbr/Atf3/Atp1a1/Cadps2/Klf10/Egfr/Kank2/Aif1/Sox9/Folr1/Cnn2/Slc38a2/Ucp2/Ptprc/Fas/Cacnb3/Pim1/Fyn/Tlr4/Bag3/P2rx7/Ccl2/Cyba/Map3k1/Asns/Lyn/Sfrp1/Rnf152/Comt/P2ry12/Gdap1/Dapl1/Cib2/Map3k5/Lamp2/Ptgs2/Cdkn1a/Itga6/Ctsl/Ripor2/Hmox1/Trpm4	50
CC	GO:0030139	endocytic vesicle	32|1463	168|16707	2.11559e-05	0.00022455	ENSMUSG00000061232/ENSMUSG00000060802/ENSMUSG00000073411/ENSMUSG00000026728/ENSMUSG00000046879/ENSMUSG00000056515/ENSMUSG00000067212/ENSMUSG00000023460/ENSMUSG00000020122/ENSMUSG00000032554/ENSMUSG00000015243/ENSMUSG00000001761/ENSMUSG00000037321/ENSMUSG00000026177/ENSMUSG00000061981/ENSMUSG00000029860/ENSMUSG00000052688/ENSMUSG00000052160/ENSMUSG00000035385/ENSMUSG00000042105/ENSMUSG00000026879/…	H2-K1/B2m/H2-D1/Vim/Irgm1/Rab31/H2-T23/Rab12/Egfr/Trf/Abca1/Smo/Tap1/Slc11a1/Flot2/Zyx/Rab7b/Pld4/Ccl2/Inpp5f/Gsn/Cdc42ep4/H2-Q7/Scara5/Dab2ip/Myo1c/Lamp2/Rab35/Rab8b/Slc5a7/Syt11/Flnb	32
BP	GO:0043588	skin development	37|1439	204|16518	1.40702e-05	0.000229547	ENSMUSG00000026923/ENSMUSG00000001507/ENSMUSG00000044786/ENSMUSG00000027168/ENSMUSG00000024659/ENSMUSG00000026185/ENSMUSG00000015647/ENSMUSG00000020122/ENSMUSG00000000567/ENSMUSG00000014773/ENSMUSG00000020140/ENSMUSG00000001761/ENSMUSG00000026837/ENSMUSG00000021994/ENSMUSG00000039239/ENSMUSG00000058056/ENSMUSG00000020580/ENSMUSG00000040606/ENSMUSG00000047250/ENSMUSG00000021127/ENSMUSG00000053110/…	Notch1/Itga3/Zfp36/Pax6/Anxa1/Igfbp5/Lama5/Egfr/Sox9/Dll1/Lgr5/Smo/Col5a1/Wnt5a/Tgfb2/Palld/Rock2/Kazn/Ptgs1/Zfp36l1/Yap1/Epha2/Prkch/Col1a2/Vangl2/Fosl2/St14/Ptgs2/Slitrk5/Irf6/Krt1/Jup/Cdh3/Itga6/Ctsl/Fzd6/Flnb	37
BP	GO:0001913	T cell mediated cytotoxicity	15|1439	50|16518	1.41286e-05	0.000229812	ENSMUSG00000035929/ENSMUSG00000061232/ENSMUSG00000060802/ENSMUSG00000073411/ENSMUSG00000030560/ENSMUSG00000067212/ENSMUSG00000032359/ENSMUSG00000026395/ENSMUSG00000016206/ENSMUSG00000073409/ENSMUSG00000040511/ENSMUSG00000029468/ENSMUSG00000060550/ENSMUSG00000056116/ENSMUSG00000022378	H2-Q4/H2-K1/B2m/H2-D1/Ctsc/H2-T23/Ctsh/Ptprc/H2-M3/H2-Q6/Pvr/P2rx7/H2-Q7/H2-T22/Fam49b	15
BP	GO:0050878	regulation of body fluid levels	48|1439	293|16518	1.44821e-05	0.00023486	ENSMUSG00000023224/ENSMUSG00000082361/ENSMUSG00000028583/ENSMUSG00000007655/ENSMUSG00000022912/ENSMUSG00000003534/ENSMUSG00000024411/ENSMUSG00000002985/ENSMUSG00000002602/ENSMUSG00000029231/ENSMUSG00000006435/ENSMUSG00000030342/ENSMUSG00000032562/ENSMUSG00000052920/ENSMUSG00000027712/ENSMUSG00000064210/ENSMUSG00000028128/ENSMUSG00000039005/ENSMUSG00000056724/ENSMUSG00000020120/ENSMUSG00000014361/…	Serping1/Btc/Pdpn/Cav1/Pros1/Ddr1/Aqp4/Apoe/Axl/Pdgfra/Neurl1a/Cd9/Gnai2/Prkg1/Anxa5/Ano6/F3/Tlr4/Nbeal2/Plek/Mertk/Slc4a5/Anxa2/Thbs1/Cyba/C3/Oas2/Lyn/Ptpn6/Abat/Cx3cl1/Stat5b/Vwf/Dmtn/Aqp5/Entpd1/P2ry12/Adora1/Socs2/Cd34/Scnn1a/Fcer1g/Krt1/Stat5a/Pik3cg/Prkcq/Serpine2/Fzd6	48
BP	GO:0032233	positive regulation of actin filament bundle assembly	17|1439	62|16518	1.45814e-05	0.000235768	ENSMUSG00000020388/ENSMUSG00000019997/ENSMUSG00000037736/ENSMUSG00000031328/ENSMUSG00000043079/ENSMUSG00000022469/ENSMUSG00000002233/ENSMUSG00000041959/ENSMUSG00000020120/ENSMUSG00000020580/ENSMUSG00000071176/ENSMUSG00000033542/ENSMUSG00000032402/ENSMUSG00000040711/ENSMUSG00000027805/ENSMUSG00000031778/ENSMUSG00000026778	Pdlim4/Ctgf/Limch1/Flna/Synpo/Rapgef3/Rhoc/S100a10/Plek/Rock2/Arhgef10/Arhgef5/Smad3/Sh3pxd2b/Pfn2/Cx3cl1/Prkcq	17
BP	GO:0046425	regulation of JAK-STAT cascade	23|1439	101|16518	1.46971e-05	0.000236936	ENSMUSG00000053175/ENSMUSG00000026923/ENSMUSG00000053113/ENSMUSG00000030341/ENSMUSG00000024087/ENSMUSG00000007655/ENSMUSG00000034394/ENSMUSG00000022906/ENSMUSG00000034422/ENSMUSG00000024621/ENSMUSG00000018899/ENSMUSG00000021756/ENSMUSG00000055737/ENSMUSG00000026395/ENSMUSG00000027718/ENSMUSG00000019843/ENSMUSG00000040663/ENSMUSG00000042258/ENSMUSG00000042105/ENSMUSG00000028399/ENSMUSG00000042228/…	Bcl3/Notch1/Socs3/Tnfrsf1a/Cyp1b1/Cav1/Lif/Parp9/Parp14/Csf1r/Irf1/Il6st/Ghr/Ptprc/Il21/Fyn/Clcf1/Isl1/Inpp5f/Ptprd/Lyn/Socs2/Dab1	23
BP	GO:0048771	tissue remodeling	32|1439	166|16518	1.48024e-05	0.00023793	ENSMUSG00000038642/ENSMUSG00000007655/ENSMUSG00000031328/ENSMUSG00000023031/ENSMUSG00000037820/ENSMUSG00000034394/ENSMUSG00000000957/ENSMUSG00000002602/ENSMUSG00000024659/ENSMUSG00000030669/ENSMUSG00000026185/ENSMUSG00000024621/ENSMUSG00000020122/ENSMUSG00000032554/ENSMUSG00000001131/ENSMUSG00000027087/ENSMUSG00000024781/ENSMUSG00000039239/ENSMUSG00000066551/ENSMUSG00000027878/ENSMUSG00000014361/…	Ctss/Cav1/Flna/Cela1/Tgm2/Lif/Mmp14/Axl/Anxa1/Calca/Igfbp5/Csf1r/Egfr/Trf/Timp1/Itgav/Lipa/Tgfb2/Hmgb1/Notch2/Mertk/P2rx7/Cd24a/Epha2/Rab3d/Sfrp1/Abr/Stat5a/Pth1r/Rassf2/Abcb1b/Lrp5	32
BP	GO:0051283	negative regulation of sequestering of calcium ion	25|1439	115|16518	1.50242e-05	0.000240784	ENSMUSG00000037225/ENSMUSG00000034855/ENSMUSG00000027712/ENSMUSG00000034462/ENSMUSG00000003161/ENSMUSG00000027087/ENSMUSG00000026395/ENSMUSG00000028207/ENSMUSG00000039239/ENSMUSG00000029468/ENSMUSG00000042644/ENSMUSG00000006519/ENSMUSG00000016933/ENSMUSG00000042686/ENSMUSG00000048677/ENSMUSG00000042228/ENSMUSG00000018340/ENSMUSG00000004266/ENSMUSG00000079110/ENSMUSG00000031778/ENSMUSG00000079227/…	Fgf2/Cxcl10/Anxa5/Pkd2/Sri/Itgav/Ptprc/Asph/Tgfb2/P2rx7/Itpr3/Cyba/Plcg1/Jph1/Tpcn2/Lyn/Anxa6/Ptpn6/Capn3/Cx3cl1/Ccr5/Itpr1/Tpcn1/Slc8b1/Selenon	25
BP	GO:1902903	regulation of supramolecular fiber organization	52|1439	327|16518	1.52364e-05	0.00024347	ENSMUSG00000022037/ENSMUSG00000036995/ENSMUSG00000037405/ENSMUSG00000007655/ENSMUSG00000020388/ENSMUSG00000019997/ENSMUSG00000037736/ENSMUSG00000031328/ENSMUSG00000002985/ENSMUSG00000043079/ENSMUSG00000040811/ENSMUSG00000022892/ENSMUSG00000032060/ENSMUSG00000029622/ENSMUSG00000021068/ENSMUSG00000032194/ENSMUSG00000021676/ENSMUSG00000027479/ENSMUSG00000034616/ENSMUSG00000022469/ENSMUSG00000002233/…	Clu/Asap3/Icam1/Cav1/Pdlim4/Ctgf/Limch1/Flna/Apoe/Synpo/Eml2/App/Cryab/Arpc1b/Nin/Kank2/Iqgap2/Mapre1/Ssh3/Rapgef3/Rhoc/S100a10/Sptbn4/Capg/Plek/Rock2/Slc39a12/Arhgef10/Arhgef5/Nckap1l/Smad3/Myadm/Sh3pxd2b/Gsn/Cdc42ep4/Stmn2/Gas2l1/Pfn2/Cx3cl1/Dmtn/Tmeff2/Rgs4/Arhgap6/Myo1c/Clip3/Plekhh2/Arpin/Slit2/Emilin1/Dbn1/2900011O08Rik/Prkcq	52
BP	GO:0002483	antigen processing and presentation of endogenous peptide antigen	10|1439	24|16518	1.53153e-05	0.000244016	ENSMUSG00000035929/ENSMUSG00000061232/ENSMUSG00000060802/ENSMUSG00000073411/ENSMUSG00000067212/ENSMUSG00000037321/ENSMUSG00000016206/ENSMUSG00000073409/ENSMUSG00000060550/ENSMUSG00000056116	H2-Q4/H2-K1/B2m/H2-D1/H2-T23/Tap1/H2-M3/H2-Q6/H2-Q7/H2-T22	10
MF	GO:0019199	transmembrane receptor protein kinase activity	20|1421	76|16303	5.27138e-06	0.000248809	ENSMUSG00000031565/ENSMUSG00000003534/ENSMUSG00000020467/ENSMUSG00000002602/ENSMUSG00000062960/ENSMUSG00000026674/ENSMUSG00000029231/ENSMUSG00000024621/ENSMUSG00000020122/ENSMUSG00000024620/ENSMUSG00000005640/ENSMUSG00000055254/ENSMUSG00000026836/ENSMUSG00000021464/ENSMUSG00000014361/ENSMUSG00000032440/ENSMUSG00000029287/ENSMUSG00000006445/ENSMUSG00000062312/ENSMUSG00000030849	Fgfr1/Ddr1/Efemp1/Axl/Kdr/Ddr2/Pdgfra/Csf1r/Egfr/Pdgfrb/Insrr/Ntrk2/Acvr1/Ror2/Mertk/Tgfbr2/Tgfbr3/Epha2/Erbb2/Fgfr2	20
CC	GO:0098636	protein complex involved in cell adhesion	12|1463	35|16707	2.4051e-05	0.000250877	ENSMUSG00000025321/ENSMUSG00000001507/ENSMUSG00000027087/ENSMUSG00000000290/ENSMUSG00000027009/ENSMUSG00000030786/ENSMUSG00000042228/ENSMUSG00000025809/ENSMUSG00000039115/ENSMUSG00000027111/ENSMUSG00000029163/ENSMUSG00000022817	Itgb8/Itga3/Itgav/Itgb2/Itga4/Itgam/Lyn/Itgb1/Itga9/Itga6/Emilin1/Itgb5	12
CC	GO:0032589	neuron projection membrane	17|1463	64|16707	2.46004e-05	0.000252258	ENSMUSG00000021057/ENSMUSG00000015968/ENSMUSG00000035441/ENSMUSG00000035863/ENSMUSG00000053550/ENSMUSG00000020524/ENSMUSG00000027270/ENSMUSG00000017314/ENSMUSG00000028173/ENSMUSG00000053930/ENSMUSG00000042429/ENSMUSG00000004631/ENSMUSG00000010803/ENSMUSG00000017774/ENSMUSG00000020436/ENSMUSG00000096883/ENSMUSG00000036006	Akap5/Cacna1d/Myo1d/Palm/Shisa7/Gria1/Lamp5/Mpp2/Wls/Shisa6/Adora1/Sgce/Gabra1/Myo1c/Gabrg2/Shisa8/Ripor2	17
BP	GO:0032755	positive regulation of interleukin-6 production	19|1439	75|16518	1.62116e-05	0.000257542	ENSMUSG00000040296/ENSMUSG00000026896/ENSMUSG00000024810/ENSMUSG00000027995/ENSMUSG00000021994/ENSMUSG00000001123/ENSMUSG00000039005/ENSMUSG00000066551/ENSMUSG00000029468/ENSMUSG00000042258/ENSMUSG00000052688/ENSMUSG00000006519/ENSMUSG00000038058/ENSMUSG00000032508/ENSMUSG00000079227/ENSMUSG00000058715/ENSMUSG00000032041/ENSMUSG00000037447/ENSMUSG00000030281	Ddx58/Ifih1/Il33/Tlr2/Wnt5a/Lgals9/Tlr4/Hmgb1/P2rx7/Isl1/Rab7b/Cyba/Nod1/Myd88/Ccr5/Fcer1g/Tirap/Arid5a/Il17rc	19
BP	GO:0010464	regulation of mesenchymal cell proliferation	12|1439	34|16518	1.62851e-05	0.000257958	ENSMUSG00000031565/ENSMUSG00000029838/ENSMUSG00000000567/ENSMUSG00000001761/ENSMUSG00000052957/ENSMUSG00000021994/ENSMUSG00000008575/ENSMUSG00000066551/ENSMUSG00000032440/ENSMUSG00000028063/ENSMUSG00000021835/ENSMUSG00000024913	Fgfr1/Ptn/Sox9/Smo/Gas1/Wnt5a/Nfib/Hmgb1/Tgfbr2/Lmna/Bmp4/Lrp5	12
BP	GO:0019932	second-messenger-mediated signaling	58|1439	379|16518	1.6369e-05	0.000258535	ENSMUSG00000028635/ENSMUSG00000027962/ENSMUSG00000052336/ENSMUSG00000002985/ENSMUSG00000069874/ENSMUSG00000062960/ENSMUSG00000030669/ENSMUSG00000032562/ENSMUSG00000034855/ENSMUSG00000028036/ENSMUSG00000051359/ENSMUSG00000052920/ENSMUSG00000021057/ENSMUSG00000031841/ENSMUSG00000028184/ENSMUSG00000015968/ENSMUSG00000020122/ENSMUSG00000034462/ENSMUSG00000003161/ENSMUSG00000000567/ENSMUSG00000015243/…	Edn2/Vcam1/Cx3cr1/Apoe/Irgm2/Kdr/Calca/Gnai2/Cxcl10/Ptgfr/Ncald/Prkg1/Akap5/Cdh13/Adgrl2/Cacna1d/Egfr/Pkd2/Sri/Sox9/Abca1/Cetn4/Trem2/Lgr5/Ptprc/Npr2/Pde5a/Adgrl1/Adgrg6/Asph/Samd14/Gucy1b1/Dmpk/Itpr3/Thbs1/Adgre1/Cd24a/Plcg1/Tpcn2/Gnai1/Ccr5/Dmtn/Aplp1/P2ry12/Rapgef4/Prkar1a/Itpr1/Ramp1/Gpr62/Ndnf/Adgrb1/Pth1r/Mt1/Trpm4/Gucy1a1/Nfatc4/Selenon/Pde4b	58
MF	GO:0042608	T cell receptor binding	8|1421	14|16303	6.07963e-06	0.000260871	ENSMUSG00000035929/ENSMUSG00000061232/ENSMUSG00000073411/ENSMUSG00000067212/ENSMUSG00000019843/ENSMUSG00000073409/ENSMUSG00000060550/ENSMUSG00000020143	H2-Q4/H2-K1/H2-D1/H2-T23/Fyn/H2-Q6/H2-Q7/Dock2	8
MF	GO:0044548	S100 protein binding	8|1421	14|16303	6.07963e-06	0.000260871	ENSMUSG00000001025/ENSMUSG00000044080/ENSMUSG00000069833/ENSMUSG00000027907/ENSMUSG00000032231/ENSMUSG00000052397/ENSMUSG00000033208/ENSMUSG00000049265	S100a6/S100a1/Ahnak/S100a11/Anxa2/Ezr/S100b/Kcnk3	8
BP	GO:0060402	calcium ion transport into cytosol	30|1439	152|16518	1.68375e-05	0.000265167	ENSMUSG00000037225/ENSMUSG00000007655/ENSMUSG00000034855/ENSMUSG00000021057/ENSMUSG00000034462/ENSMUSG00000003161/ENSMUSG00000027087/ENSMUSG00000026395/ENSMUSG00000003352/ENSMUSG00000028207/ENSMUSG00000019843/ENSMUSG00000039239/ENSMUSG00000029468/ENSMUSG00000042644/ENSMUSG00000006519/ENSMUSG00000016933/ENSMUSG00000042686/ENSMUSG00000048677/ENSMUSG00000042228/ENSMUSG00000004266/ENSMUSG00000079110/…	Fgf2/Cav1/Cxcl10/Akap5/Pkd2/Sri/Itgav/Ptprc/Cacnb3/Asph/Fyn/Tgfb2/P2rx7/Itpr3/Cyba/Plcg1/Jph1/Tpcn2/Lyn/Ptpn6/Capn3/Cx3cl1/Cacna1g/Ccr5/Bmp4/Itpr1/Tpcn1/Trpm1/Slc8b1/Selenon	30
BP	GO:1904892	regulation of STAT cascade	23|1439	102|16518	1.74333e-05	0.000273758	ENSMUSG00000053175/ENSMUSG00000026923/ENSMUSG00000053113/ENSMUSG00000030341/ENSMUSG00000024087/ENSMUSG00000007655/ENSMUSG00000034394/ENSMUSG00000022906/ENSMUSG00000034422/ENSMUSG00000024621/ENSMUSG00000018899/ENSMUSG00000021756/ENSMUSG00000055737/ENSMUSG00000026395/ENSMUSG00000027718/ENSMUSG00000019843/ENSMUSG00000040663/ENSMUSG00000042258/ENSMUSG00000042105/ENSMUSG00000028399/ENSMUSG00000042228/…	Bcl3/Notch1/Socs3/Tnfrsf1a/Cyp1b1/Cav1/Lif/Parp9/Parp14/Csf1r/Irf1/Il6st/Ghr/Ptprc/Il21/Fyn/Clcf1/Isl1/Inpp5f/Ptprd/Lyn/Socs2/Dab1	23
BP	GO:0030100	regulation of endocytosis	42|1439	246|16518	1.782e-05	0.000278156	ENSMUSG00000022037/ENSMUSG00000060802/ENSMUSG00000007655/ENSMUSG00000022912/ENSMUSG00000055447/ENSMUSG00000002985/ENSMUSG00000002602/ENSMUSG00000025351/ENSMUSG00000021057/ENSMUSG00000031837/ENSMUSG00000031841/ENSMUSG00000032554/ENSMUSG00000057729/ENSMUSG00000064210/ENSMUSG00000004665/ENSMUSG00000014773/ENSMUSG00000027087/ENSMUSG00000050335/ENSMUSG00000026395/ENSMUSG00000059714/ENSMUSG00000028249/…	Clu/B2m/Cav1/Pros1/Cd47/Apoe/Axl/Cd63/Akap5/Necab2/Cdh13/Trf/Prtn3/Ano6/Cnn2/Dll1/Itgav/Lgals3/Ptprc/Flot1/Sdcbp/Slc11a1/Wnt5a/Hmgb1/Mertk/Ccl2/Anxa2/Ptpn1/Nckap1l/Cyba/Cd151/C3/Lrp1/Itgb1/Dock2/Abr/Gm6970/Fcer1g/Clip3/Hck/Syt11/Ophn1	42
BP	GO:0007009	plasma membrane organization	20|1439	82|16518	1.79686e-05	0.000278156	ENSMUSG00000022037/ENSMUSG00000048612/ENSMUSG00000007655/ENSMUSG00000032372/ENSMUSG00000041936/ENSMUSG00000064210/ENSMUSG00000026837/ENSMUSG00000026395/ENSMUSG00000059714/ENSMUSG00000039239/ENSMUSG00000039735/ENSMUSG00000029468/ENSMUSG00000042828/ENSMUSG00000026879/ENSMUSG00000026109/ENSMUSG00000033763/ENSMUSG00000046743/ENSMUSG00000000058/ENSMUSG00000074364/ENSMUSG00000068923	Clu/Myof/Cav1/Plscr2/Agrn/Ano6/Col5a1/Ptprc/Flot1/Tgfb2/Fnbp1l/P2rx7/Trim72/Gsn/Tmeff2/Mtss1l/Fat4/Cav2/Ehd2/Syt11	20
BP	GO:0014033	neural crest cell differentiation	20|1439	82|16518	1.79686e-05	0.000278156	ENSMUSG00000027168/ENSMUSG00000025921/ENSMUSG00000015647/ENSMUSG00000000567/ENSMUSG00000001827/ENSMUSG00000001761/ENSMUSG00000063531/ENSMUSG00000026836/ENSMUSG00000027004/ENSMUSG00000042258/ENSMUSG00000062432/ENSMUSG00000019647/ENSMUSG00000031548/ENSMUSG00000018340/ENSMUSG00000031217/ENSMUSG00000026193/ENSMUSG00000021835/ENSMUSG00000019966/ENSMUSG00000025207/ENSMUSG00000026872	Pax6/Rdh10/Lama5/Sox9/Folr1/Smo/Sema3e/Acvr1/Frzb/Isl1/Cyp26c1/Sema6a/Sfrp1/Anxa6/Efnb1/Fn1/Bmp4/Kitl/Sema4g/Zeb2	20
BP	GO:0042035	regulation of cytokine biosynthetic process	20|1439	82|16518	1.79686e-05	0.000278156	ENSMUSG00000053175/ENSMUSG00000052336/ENSMUSG00000044786/ENSMUSG00000028163/ENSMUSG00000018899/ENSMUSG00000026395/ENSMUSG00000027718/ENSMUSG00000021994/ENSMUSG00000030124/ENSMUSG00000026946/ENSMUSG00000039005/ENSMUSG00000040152/ENSMUSG00000056501/ENSMUSG00000032508/ENSMUSG00000035914/ENSMUSG00000020919/ENSMUSG00000033208/ENSMUSG00000032041/ENSMUSG00000004043/ENSMUSG00000026778	Bcl3/Cx3cr1/Zfp36/Nfkb1/Irf1/Ptprc/Il21/Wnt5a/Lag3/Nmi/Tlr4/Thbs1/Cebpb/Myd88/Cd276/Stat5b/S100b/Tirap/Stat5a/Prkcq	20
BP	GO:0048864	stem cell development	20|1439	82|16518	1.79686e-05	0.000278156	ENSMUSG00000037225/ENSMUSG00000027168/ENSMUSG00000025921/ENSMUSG00000015647/ENSMUSG00000000567/ENSMUSG00000001827/ENSMUSG00000001761/ENSMUSG00000026395/ENSMUSG00000063531/ENSMUSG00000026836/ENSMUSG00000042258/ENSMUSG00000062432/ENSMUSG00000019647/ENSMUSG00000018340/ENSMUSG00000031217/ENSMUSG00000026193/ENSMUSG00000021835/ENSMUSG00000019966/ENSMUSG00000025207/ENSMUSG00000026872	Fgf2/Pax6/Rdh10/Lama5/Sox9/Folr1/Smo/Ptprc/Sema3e/Acvr1/Isl1/Cyp26c1/Sema6a/Anxa6/Efnb1/Fn1/Bmp4/Kitl/Sema4g/Zeb2	20
BP	GO:0032964	collagen biosynthetic process	15|1439	51|16518	1.84164e-05	0.00028428	ENSMUSG00000026728/ENSMUSG00000023191/ENSMUSG00000019997/ENSMUSG00000019982/ENSMUSG00000022469/ENSMUSG00000001870/ENSMUSG00000024620/ENSMUSG00000026837/ENSMUSG00000070436/ENSMUSG00000052914/ENSMUSG00000035385/ENSMUSG00000020810/ENSMUSG00000021835/ENSMUSG00000041779/ENSMUSG00000029163	Vim/P3h3/Ctgf/Myb/Rapgef3/Ltbp1/Pdgfrb/Col5a1/Serpinh1/Cyp2j6/Ccl2/Cygb/Bmp4/Tram2/Emilin1	15
MF	GO:0004714	transmembrane receptor protein tyrosine kinase activity	17|1421	59|16303	7.07932e-06	0.00029056	ENSMUSG00000031565/ENSMUSG00000003534/ENSMUSG00000020467/ENSMUSG00000002602/ENSMUSG00000062960/ENSMUSG00000026674/ENSMUSG00000029231/ENSMUSG00000024621/ENSMUSG00000020122/ENSMUSG00000024620/ENSMUSG00000005640/ENSMUSG00000055254/ENSMUSG00000021464/ENSMUSG00000014361/ENSMUSG00000006445/ENSMUSG00000062312/ENSMUSG00000030849	Fgfr1/Ddr1/Efemp1/Axl/Kdr/Ddr2/Pdgfra/Csf1r/Egfr/Pdgfrb/Insrr/Ntrk2/Ror2/Mertk/Epha2/Erbb2/Fgfr2	17
BP	GO:1990266	neutrophil migration	21|1439	89|16518	1.92782e-05	0.000296742	ENSMUSG00000028635/ENSMUSG00000026072/ENSMUSG00000034855/ENSMUSG00000057729/ENSMUSG00000050335/ENSMUSG00000039239/ENSMUSG00000035776/ENSMUSG00000035385/ENSMUSG00000022488/ENSMUSG00000059883/ENSMUSG00000035352/ENSMUSG00000032508/ENSMUSG00000031778/ENSMUSG00000031990/ENSMUSG00000039115/ENSMUSG00000058715/ENSMUSG00000019122/ENSMUSG00000034116/ENSMUSG00000031558/ENSMUSG00000036006/ENSMUSG00000028525	Edn2/Il1r1/Cxcl10/Prtn3/Lgals3/Tgfb2/Cd99l2/Ccl2/Nckap1l/Irak4/Ccl12/Myd88/Cx3cl1/Jam3/Itga9/Fcer1g/Ccl9/Vav1/Slit2/Ripor2/Pde4b	21
BP	GO:0001935	endothelial cell proliferation	27|1439	131|16518	1.94785e-05	0.000298542	ENSMUSG00000037225/ENSMUSG00000004040/ENSMUSG00000031565/ENSMUSG00000007655/ENSMUSG00000016918/ENSMUSG00000002985/ENSMUSG00000000957/ENSMUSG00000062960/ENSMUSG00000018593/ENSMUSG00000026104/ENSMUSG00000031841/ENSMUSG00000027009/ENSMUSG00000021994/ENSMUSG00000066551/ENSMUSG00000035385/ENSMUSG00000040152/ENSMUSG00000006519/ENSMUSG00000016933/ENSMUSG00000006445/ENSMUSG00000035352/ENSMUSG00000021835/…	Fgf2/Stat3/Fgfr1/Cav1/Sulf1/Apoe/Mmp14/Kdr/Sparc/Stat1/Cdh13/Itga4/Wnt5a/Hmgb1/Ccl2/Thbs1/Cyba/Plcg1/Epha2/Ccl12/Bmp4/Cd34/Nrarp/Cav2/Stat5a/Ang/Hmox1	27
BP	GO:0002428	antigen processing and presentation of peptide antigen via MHC class Ib	9|1439	20|16518	1.95047e-05	0.000298542	ENSMUSG00000035929/ENSMUSG00000061232/ENSMUSG00000060802/ENSMUSG00000073411/ENSMUSG00000067212/ENSMUSG00000016206/ENSMUSG00000073409/ENSMUSG00000060550/ENSMUSG00000056116	H2-Q4/H2-K1/B2m/H2-D1/H2-T23/H2-M3/H2-Q6/H2-Q7/H2-T22	9
BP	GO:0050804	modulation of chemical synaptic transmission	59|1439	390|16518	1.96966e-05	0.000299927	ENSMUSG00000004040/ENSMUSG00000020932/ENSMUSG00000021701/ENSMUSG00000052336/ENSMUSG00000002985/ENSMUSG00000043079/ENSMUSG00000006435/ENSMUSG00000029838/ENSMUSG00000032562/ENSMUSG00000001985/ENSMUSG00000022892/ENSMUSG00000025892/ENSMUSG00000020122/ENSMUSG00000010066/ENSMUSG00000056073/ENSMUSG00000059714/ENSMUSG00000028631/ENSMUSG00000003352/ENSMUSG00000055254/ENSMUSG00000033174/ENSMUSG00000021464/…	Stat3/Gfap/Plk2/Cx3cr1/Apoe/Synpo/Neurl1a/Ptn/Gnai2/Grik3/App/Gria4/Egfr/Cacna2d2/Grik2/Flot1/Kcnq4/Cacnb3/Ntrk2/Mgll/Ror2/Gucy1b1/Shisa7/Slc1a3/Ccl2/Oxtr/Gria1/Dmpk/Lrp8/Cacna1b/Itpr3/Mpp2/Cspg5/Cacna1a/Shisa6/Pfn2/Abat/Gnai1/Camk2b/Adora1/Rgs4/Rapgef4/Cux2/S100b/Ptgs2/Camk2a/Shisa8/Arc/Dbn1/Adgrb1/Unc13c/Iqsec2/Sybu/Slc6a1/Serpine2/Slc24a2/Nfatc4/Snap47/Ophn1	59
BP	GO:0014015	positive regulation of gliogenesis	19|1439	76|16518	1.98704e-05	0.000299927	ENSMUSG00000020932/ENSMUSG00000026923/ENSMUSG00000026728/ENSMUSG00000014599/ENSMUSG00000034394/ENSMUSG00000019982/ENSMUSG00000021756/ENSMUSG00000022892/ENSMUSG00000032554/ENSMUSG00000027995/ENSMUSG00000068748/ENSMUSG00000040663/ENSMUSG00000022425/ENSMUSG00000042228/ENSMUSG00000015599/ENSMUSG00000036353/ENSMUSG00000041736/ENSMUSG00000021108/ENSMUSG00000026249	Gfap/Notch1/Vim/Csf1/Lif/Myb/Il6st/App/Trf/Tlr2/Ptprz1/Clcf1/Enpp2/Lyn/Ttbk1/P2ry12/Tspo/Prkch/Serpine2	19
BP	GO:0048678	response to axon injury	19|1439	76|16518	1.98704e-05	0.000299927	ENSMUSG00000037225/ENSMUSG00000070509/ENSMUSG00000024397/ENSMUSG00000001827/ENSMUSG00000022324/ENSMUSG00000052911/ENSMUSG00000042258/ENSMUSG00000042105/ENSMUSG00000042834/ENSMUSG00000051379/ENSMUSG00000042228/ENSMUSG00000033295/ENSMUSG00000062312/ENSMUSG00000068220/ENSMUSG00000050896/ENSMUSG00000036353/ENSMUSG00000041736/ENSMUSG00000045287/ENSMUSG00000031990	Fgf2/Rgma/Aif1/Folr1/Matn2/Lamb2/Isl1/Inpp5f/Nrep/Flrt3/Lyn/Ptprf/Erbb2/Lgals1/Rtn4rl2/P2ry12/Tspo/Rtn4rl1/Jam3	19
BP	GO:0050764	regulation of phagocytosis	19|1439	76|16518	1.98704e-05	0.000299927	ENSMUSG00000022912/ENSMUSG00000055447/ENSMUSG00000057729/ENSMUSG00000064210/ENSMUSG00000004665/ENSMUSG00000027087/ENSMUSG00000026395/ENSMUSG00000026177/ENSMUSG00000066551/ENSMUSG00000014361/ENSMUSG00000035385/ENSMUSG00000022488/ENSMUSG00000006519/ENSMUSG00000024164/ENSMUSG00000020143/ENSMUSG00000017631/ENSMUSG00000058715/ENSMUSG00000003283/ENSMUSG00000068923	Pros1/Cd47/Prtn3/Ano6/Cnn2/Itgav/Ptprc/Slc11a1/Hmgb1/Mertk/Ccl2/Nckap1l/Cyba/C3/Dock2/Abr/Fcer1g/Hck/Syt11	19
BP	GO:2001057	reactive nitrogen species metabolic process	19|1439	76|16518	1.98704e-05	0.000299927	ENSMUSG00000022037/ENSMUSG00000037405/ENSMUSG00000024087/ENSMUSG00000007655/ENSMUSG00000052336/ENSMUSG00000055447/ENSMUSG00000031596/ENSMUSG00000034462/ENSMUSG00000024397/ENSMUSG00000076441/ENSMUSG00000027995/ENSMUSG00000000290/ENSMUSG00000016206/ENSMUSG00000039005/ENSMUSG00000028194/ENSMUSG00000032402/ENSMUSG00000041736/ENSMUSG00000016494/ENSMUSG00000032487	Clu/Icam1/Cyp1b1/Cav1/Cx3cr1/Cd47/Slc7a2/Pkd2/Aif1/Ass1/Tlr2/Itgb2/H2-M3/Tlr4/Ddah1/Smad3/Tspo/Cd34/Ptgs2	19
BP	GO:1904019	epithelial cell apoptotic process	22|1439	96|16518	2.0151e-05	0.000303322	ENSMUSG00000037405/ENSMUSG00000062960/ENSMUSG00000044786/ENSMUSG00000002799/ENSMUSG00000064210/ENSMUSG00000038805/ENSMUSG00000027009/ENSMUSG00000024778/ENSMUSG00000021585/ENSMUSG00000032440/ENSMUSG00000040152/ENSMUSG00000059866/ENSMUSG00000016933/ENSMUSG00000021127/ENSMUSG00000026879/ENSMUSG00000035352/ENSMUSG00000021835/ENSMUSG00000056481/ENSMUSG00000071369/ENSMUSG00000049001/ENSMUSG00000020573/…	Icam1/Kdr/Zfp36/Jag2/Ano6/Six3/Itga4/Fas/Cast/Tgfbr2/Thbs1/Tnip2/Plcg1/Zfp36l1/Gsn/Ccl12/Bmp4/Cd248/Map3k5/Ndnf/Pik3cg/Hmox1	22
BP	GO:0022408	negative regulation of cell-cell adhesion	31|1439	161|16518	2.04927e-05	0.000305916	ENSMUSG00000022508/ENSMUSG00000023915/ENSMUSG00000030342/ENSMUSG00000024659/ENSMUSG00000018899/ENSMUSG00000052920/ENSMUSG00000076441/ENSMUSG00000053965/ENSMUSG00000030124/ENSMUSG00000001123/ENSMUSG00000016206/ENSMUSG00000066551/ENSMUSG00000016496/ENSMUSG00000056501/ENSMUSG00000047139/ENSMUSG00000068566/ENSMUSG00000073421/ENSMUSG00000062312/ENSMUSG00000004266/ENSMUSG00000057880/ENSMUSG00000035914/…	Bcl6/Tnfrsf21/Cd9/Anxa1/Irf1/Prkg1/Ass1/Pde5a/Lag3/Lgals9/H2-M3/Hmgb1/Cd274/Cebpb/Cd24a/Myadm/H2-Ab1/Erbb2/Ptpn6/Abat/Cd276/Ccl28/Bmp4/Prkar1a/Nrarp/Vsir/Pag1/Zfp608/Ripor2/Serpine2/Cd86	31
BP	GO:0030177	positive regulation of Wnt signaling pathway	25|1439	117|16518	2.05479e-05	0.000305916	ENSMUSG00000037225/ENSMUSG00000030309/ENSMUSG00000007655/ENSMUSG00000016918/ENSMUSG00000028163/ENSMUSG00000006800/ENSMUSG00000020122/ENSMUSG00000020140/ENSMUSG00000027995/ENSMUSG00000040183/ENSMUSG00000023972/ENSMUSG00000021994/ENSMUSG00000021464/ENSMUSG00000008734/ENSMUSG00000058756/ENSMUSG00000032402/ENSMUSG00000028173/ENSMUSG00000053110/ENSMUSG00000031548/ENSMUSG00000078202/ENSMUSG00000061048/…	Fgf2/Caprin2/Cav1/Sulf1/Nfkb1/Sulf2/Egfr/Lgr5/Tlr2/Ankrd6/Ptk7/Wnt5a/Ror2/Gprc5b/Thra/Smad3/Wls/Yap1/Sfrp1/Nrarp/Cdh3/Zeb2/Dact1/Csnk1e/Trpm4	25
BP	GO:0050671	positive regulation of lymphocyte proliferation	25|1439	117|16518	2.05479e-05	0.000305916	ENSMUSG00000022508/ENSMUSG00000027962/ENSMUSG00000067212/ENSMUSG00000024659/ENSMUSG00000021756/ENSMUSG00000024397/ENSMUSG00000026395/ENSMUSG00000027718/ENSMUSG00000039005/ENSMUSG00000040663/ENSMUSG00000066551/ENSMUSG00000032440/ENSMUSG00000016496/ENSMUSG00000022488/ENSMUSG00000052142/ENSMUSG00000047139/ENSMUSG00000047810/ENSMUSG00000032508/ENSMUSG00000035914/ENSMUSG00000020919/ENSMUSG00000031217/…	Bcl6/Vcam1/H2-T23/Anxa1/Il6st/Aif1/Ptprc/Il21/Tlr4/Clcf1/Hmgb1/Tgfbr2/Cd274/Nckap1l/Rasal3/Cd24a/Ccdc88b/Myd88/Cd276/Stat5b/Efnb1/Cdkn1a/Stat5a/Prkcq/Cd86	25
BP	GO:0051282	regulation of sequestering of calcium ion	25|1439	117|16518	2.05479e-05	0.000305916	ENSMUSG00000037225/ENSMUSG00000034855/ENSMUSG00000027712/ENSMUSG00000034462/ENSMUSG00000003161/ENSMUSG00000027087/ENSMUSG00000026395/ENSMUSG00000028207/ENSMUSG00000039239/ENSMUSG00000029468/ENSMUSG00000042644/ENSMUSG00000006519/ENSMUSG00000016933/ENSMUSG00000042686/ENSMUSG00000048677/ENSMUSG00000042228/ENSMUSG00000018340/ENSMUSG00000004266/ENSMUSG00000079110/ENSMUSG00000031778/ENSMUSG00000079227/…	Fgf2/Cxcl10/Anxa5/Pkd2/Sri/Itgav/Ptprc/Asph/Tgfb2/P2rx7/Itpr3/Cyba/Plcg1/Jph1/Tpcn2/Lyn/Anxa6/Ptpn6/Capn3/Cx3cl1/Ccr5/Itpr1/Tpcn1/Slc8b1/Selenon	25
BP	GO:1901652	response to peptide	66|1439	452|16518	2.07348e-05	0.000307857	ENSMUSG00000004040/ENSMUSG00000026923/ENSMUSG00000053113/ENSMUSG00000026728/ENSMUSG00000007655/ENSMUSG00000019997/ENSMUSG00000056515/ENSMUSG00000026204/ENSMUSG00000018593/ENSMUSG00000028163/ENSMUSG00000024659/ENSMUSG00000026185/ENSMUSG00000032562/ENSMUSG00000018899/ENSMUSG00000027712/ENSMUSG00000022892/ENSMUSG00000037465/ENSMUSG00000055737/ENSMUSG00000055980/ENSMUSG00000027204/ENSMUSG00000040479/…	Stat3/Notch1/Socs3/Vim/Cav1/Ctgf/Rab31/Ptprn/Sparc/Nfkb1/Anxa1/Igfbp5/Gnai2/Irf1/Anxa5/App/Klf10/Ghr/Irs1/Fbn1/Dgkz/Timp1/Ucp2/Irf5/Ass1/Tlr2/Cited1/Rhoq/Insrr/Fyn/Tlr4/Ptpre/Ccl2/Prkcb/Oxtr/Ptpn1/Cyba/Tgfbr3/Trim72/Cacna1a/Gcnt1/Zfp36l1/Lyn/Ptprf/Nod1/Lrp1/Plcd1/Stat5b/Cpeb2/Abcc8/Klf11/Socs2/Myo1c/Apobec1/Ptgs2/Abcg2/Cav2/Camk2a/Crhbp/Stat5a/Rab8b/Timeless/Prkcq/Tbc1d4/Inppl1/Lrp5	66
BP	GO:0099177	regulation of trans-synaptic signaling	59|1439	391|16518	2.12771e-05	0.000315052	ENSMUSG00000004040/ENSMUSG00000020932/ENSMUSG00000021701/ENSMUSG00000052336/ENSMUSG00000002985/ENSMUSG00000043079/ENSMUSG00000006435/ENSMUSG00000029838/ENSMUSG00000032562/ENSMUSG00000001985/ENSMUSG00000022892/ENSMUSG00000025892/ENSMUSG00000020122/ENSMUSG00000010066/ENSMUSG00000056073/ENSMUSG00000059714/ENSMUSG00000028631/ENSMUSG00000003352/ENSMUSG00000055254/ENSMUSG00000033174/ENSMUSG00000021464/…	Stat3/Gfap/Plk2/Cx3cr1/Apoe/Synpo/Neurl1a/Ptn/Gnai2/Grik3/App/Gria4/Egfr/Cacna2d2/Grik2/Flot1/Kcnq4/Cacnb3/Ntrk2/Mgll/Ror2/Gucy1b1/Shisa7/Slc1a3/Ccl2/Oxtr/Gria1/Dmpk/Lrp8/Cacna1b/Itpr3/Mpp2/Cspg5/Cacna1a/Shisa6/Pfn2/Abat/Gnai1/Camk2b/Adora1/Rgs4/Rapgef4/Cux2/S100b/Ptgs2/Camk2a/Shisa8/Arc/Dbn1/Adgrb1/Unc13c/Iqsec2/Sybu/Slc6a1/Serpine2/Slc24a2/Nfatc4/Snap47/Ophn1	59
BP	GO:0043900	regulation of multi-organism process	54|1439	348|16518	2.13947e-05	0.000315935	ENSMUSG00000026923/ENSMUSG00000037921/ENSMUSG00000029561/ENSMUSG00000030921/ENSMUSG00000007655/ENSMUSG00000025492/ENSMUSG00000024079/ENSMUSG00000020641/ENSMUSG00000002985/ENSMUSG00000022906/ENSMUSG00000040296/ENSMUSG00000035692/ENSMUSG00000029826/ENSMUSG00000044786/ENSMUSG00000021423/ENSMUSG00000026104/ENSMUSG00000031538/ENSMUSG00000046718/ENSMUSG00000001131/ENSMUSG00000027087/ENSMUSG00000049502/…	Notch1/Ddx60/Oasl2/Trim30a/Cav1/Ifitm3/Eif2ak2/Rsad2/Apoe/Parp9/Ddx58/Isg15/Zc3hav1/Zfp36/Ly86/Stat1/Plat/Bst2/Timp1/Itgav/Dtx3l/Npr2/Pde5a/Irf8/Lgals9/Cd180/Gbp4/Oxtr/Sash1/Trib1/Anxa2/Syde1/Oas1a/Cyba/Mdfic/Gsn/Nod1/Lgals1/Myd88/Mx2/Cx3cl1/Ccr5/Tmem173/A230050P20Rik/Trim21/Mid2/Cav2/Trim35/Dhx58/Lhfpl2/Apobec3/Syt11/Ifnlr1/Ptgds	54
BP	GO:0002718	regulation of cytokine production involved in immune response	18|1439	70|16518	2.16055e-05	0.000318185	ENSMUSG00000060802/ENSMUSG00000020227/ENSMUSG00000022508/ENSMUSG00000020641/ENSMUSG00000026072/ENSMUSG00000040296/ENSMUSG00000046718/ENSMUSG00000027718/ENSMUSG00000021994/ENSMUSG00000039239/ENSMUSG00000039005/ENSMUSG00000043496/ENSMUSG00000008734/ENSMUSG00000058715/ENSMUSG00000020101/ENSMUSG00000037447/ENSMUSG00000005413/ENSMUSG00000038260	B2m/Irak3/Bcl6/Rsad2/Il1r1/Ddx58/Bst2/Il21/Wnt5a/Tgfb2/Tlr4/Tril/Gprc5b/Fcer1g/Vsir/Arid5a/Hmox1/Trpm4	18
BP	GO:0032872	regulation of stress-activated MAPK cascade	36|1439	200|16518	2.16906e-05	0.000318577	ENSMUSG00000015312/ENSMUSG00000033327/ENSMUSG00000019997/ENSMUSG00000024079/ENSMUSG00000030339/ENSMUSG00000022892/ENSMUSG00000020122/ENSMUSG00000032554/ENSMUSG00000056073/ENSMUSG00000031714/ENSMUSG00000026074/ENSMUSG00000024778/ENSMUSG00000021994/ENSMUSG00000039239/ENSMUSG00000039005/ENSMUSG00000021464/ENSMUSG00000066551/ENSMUSG00000027223/ENSMUSG00000015305/ENSMUSG00000033542/ENSMUSG00000027540/…	Gadd45b/Tnxb/Ctgf/Eif2ak2/Ltbr/App/Egfr/Trf/Grik2/Gab1/Map4k4/Fas/Wnt5a/Tgfb2/Tlr4/Ror2/Hmgb1/Mapk8ip1/Sash1/Arhgef5/Ptpn1/Ezr/Mdfic/Nod1/Sfrp1/Irak1/Myd88/Dab2ip/Cdc42se1/Vangl2/Map3k5/Tirap/Map3k9/Rassf2/Zeb2/Dact1	36
BP	GO:0042102	positive regulation of T cell proliferation	20|1439	83|16518	2.17583e-05	0.000318712	ENSMUSG00000027962/ENSMUSG00000067212/ENSMUSG00000024659/ENSMUSG00000021756/ENSMUSG00000024397/ENSMUSG00000026395/ENSMUSG00000027718/ENSMUSG00000066551/ENSMUSG00000032440/ENSMUSG00000016496/ENSMUSG00000022488/ENSMUSG00000052142/ENSMUSG00000047139/ENSMUSG00000047810/ENSMUSG00000035914/ENSMUSG00000020919/ENSMUSG00000031217/ENSMUSG00000004043/ENSMUSG00000026778/ENSMUSG00000022901	Vcam1/H2-T23/Anxa1/Il6st/Aif1/Ptprc/Il21/Hmgb1/Tgfbr2/Cd274/Nckap1l/Rasal3/Cd24a/Ccdc88b/Cd276/Stat5b/Efnb1/Stat5a/Prkcq/Cd86	20
BP	GO:0097191	extrinsic apoptotic signaling pathway	37|1439	208|16518	2.19887e-05	0.000321223	ENSMUSG00000037405/ENSMUSG00000031565/ENSMUSG00000007655/ENSMUSG00000020044/ENSMUSG00000028599/ENSMUSG00000024810/ENSMUSG00000030339/ENSMUSG00000026628/ENSMUSG00000022483/ENSMUSG00000027087/ENSMUSG00000050335/ENSMUSG00000026395/ENSMUSG00000052957/ENSMUSG00000027375/ENSMUSG00000024778/ENSMUSG00000019843/ENSMUSG00000039239/ENSMUSG00000030847/ENSMUSG00000026836/ENSMUSG00000029468/ENSMUSG00000028124/…	Icam1/Fgfr1/Cav1/Timp3/Tnfrsf1b/Il33/Ltbr/Atf3/Col2a1/Itgav/Lgals3/Ptprc/Gas1/Mal/Fas/Fyn/Tgfb2/Bag3/Acvr1/P2rx7/Gclm/Lmna/Mknk2/Thbs1/Smad3/Yap1/Sfrp1/Sgk3/Cx3cl1/Dab2ip/Bmp4/Kitl/Dapk1/Tnfrsf22/Sp100/Itga6/Hmox1	37
BP	GO:0003177	pulmonary valve development	8|1439	16|16518	2.21389e-05	0.000322554	ENSMUSG00000026923/ENSMUSG00000030341/ENSMUSG00000028599/ENSMUSG00000019789/ENSMUSG00000039239/ENSMUSG00000027878/ENSMUSG00000021835/ENSMUSG00000031558	Notch1/Tnfrsf1a/Tnfrsf1b/Hey2/Tgfb2/Notch2/Bmp4/Slit2	8
BP	GO:0070374	positive regulation of ERK1 and ERK2 cascade	39|1439	224|16518	2.22107e-05	0.000322737	ENSMUSG00000037225/ENSMUSG00000026923/ENSMUSG00000005087/ENSMUSG00000064246/ENSMUSG00000037405/ENSMUSG00000031565/ENSMUSG00000019997/ENSMUSG00000003534/ENSMUSG00000002602/ENSMUSG00000062960/ENSMUSG00000026674/ENSMUSG00000029231/ENSMUSG00000032562/ENSMUSG00000024621/ENSMUSG00000022892/ENSMUSG00000031837/ENSMUSG00000020122/ENSMUSG00000028480/ENSMUSG00000023992/ENSMUSG00000024620/ENSMUSG00000026395/…	Fgf2/Notch1/Cd44/Chil1/Icam1/Fgfr1/Ctgf/Ddr1/Axl/Kdr/Ddr2/Pdgfra/Gnai2/Csf1r/App/Necab2/Egfr/Glipr2/Trem2/Pdgfrb/Ptprc/Insrr/Ntrk2/Tlr4/Ror2/Hmgb1/Notch2/Mertk/Ccl2/C3/Epha2/Erbb2/Ccl12/Nod1/Cx3cl1/Bmp4/Gcnt2/Ccl9/Tirap	39
CC	GO:0098978	glutamatergic synapse	47|1463	292|16707	3.21059e-05	0.000323734	ENSMUSG00000004040/ENSMUSG00000061718/ENSMUSG00000031328/ENSMUSG00000002985/ENSMUSG00000043079/ENSMUSG00000018593/ENSMUSG00000031538/ENSMUSG00000021057/ENSMUSG00000025892/ENSMUSG00000031517/ENSMUSG00000041936/ENSMUSG00000040479/ENSMUSG00000059714/ENSMUSG00000013033/ENSMUSG00000025555/ENSMUSG00000021994/ENSMUSG00000061981/ENSMUSG00000019843/ENSMUSG00000019558/ENSMUSG00000055254/ENSMUSG00000068748/…	Stat3/Ppp1r1b/Flna/Apoe/Synpo/Sparc/Plat/Akap5/Gria4/Gpm6a/Agrn/Dgkz/Flot1/Adgrl1/Farp1/Wnt5a/Flot2/Fyn/Slc6a8/Ntrk2/Ptprz1/Gucy1b1/Shisa7/Gria1/Slc2a3/Mpp2/Ptprd/Gria3/Lyn/Htr3a/Shisa6/Efnb1/Itgb1/Camk2b/Camk1/Abr/Rapgef4/Gpc4/Gabrg2/Camk2a/Efnb2/Lrfn4/Arc/Dbn1/Adgrb1/Ophn1/Nos1ap	47
BP	GO:0051489	regulation of filopodium assembly	14|1439	46|16518	2.26852e-05	0.000328754	ENSMUSG00000022272/ENSMUSG00000006435/ENSMUSG00000031517/ENSMUSG00000041936/ENSMUSG00000024143/ENSMUSG00000039735/ENSMUSG00000035863/ENSMUSG00000033342/ENSMUSG00000028943/ENSMUSG00000022099/ENSMUSG00000047261/ENSMUSG00000034675/ENSMUSG00000036006/ENSMUSG00000026778	Myo10/Neurl1a/Gpm6a/Agrn/Rhoq/Fnbp1l/Palm/Plppr5/Espn/Dmtn/Gap43/Dbn1/Ripor2/Prkcq	14
BP	GO:1903053	regulation of extracellular matrix organization	12|1439	35|16518	2.28268e-05	0.00032993	ENSMUSG00000026923/ENSMUSG00000030341/ENSMUSG00000028583/ENSMUSG00000003534/ENSMUSG00000028599/ENSMUSG00000048537/ENSMUSG00000026674/ENSMUSG00000000567/ENSMUSG00000039239/ENSMUSG00000032402/ENSMUSG00000029163/ENSMUSG00000033420	Notch1/Tnfrsf1a/Pdpn/Ddr1/Tnfrsf1b/Phldb1/Ddr2/Sox9/Tgfb2/Smad3/Emilin1/Antxr1	12
BP	GO:0019883	antigen processing and presentation of endogenous antigen	10|1439	25|16518	2.3537e-05	0.000339294	ENSMUSG00000035929/ENSMUSG00000061232/ENSMUSG00000060802/ENSMUSG00000073411/ENSMUSG00000067212/ENSMUSG00000037321/ENSMUSG00000016206/ENSMUSG00000073409/ENSMUSG00000060550/ENSMUSG00000056116	H2-Q4/H2-K1/B2m/H2-D1/H2-T23/Tap1/H2-M3/H2-Q6/H2-Q7/H2-T22	10
BP	GO:0001755	neural crest cell migration	15|1439	52|16518	2.38154e-05	0.0003415	ENSMUSG00000027168/ENSMUSG00000015647/ENSMUSG00000001827/ENSMUSG00000001761/ENSMUSG00000063531/ENSMUSG00000026836/ENSMUSG00000042258/ENSMUSG00000019647/ENSMUSG00000018340/ENSMUSG00000031217/ENSMUSG00000026193/ENSMUSG00000021835/ENSMUSG00000019966/ENSMUSG00000025207/ENSMUSG00000026872	Pax6/Lama5/Folr1/Smo/Sema3e/Acvr1/Isl1/Sema6a/Anxa6/Efnb1/Fn1/Bmp4/Kitl/Sema4g/Zeb2	15
BP	GO:0035924	cellular response to vascular endothelial growth factor stimulus	15|1439	52|16518	2.38154e-05	0.0003415	ENSMUSG00000026923/ENSMUSG00000027962/ENSMUSG00000025351/ENSMUSG00000062960/ENSMUSG00000029231/ENSMUSG00000024659/ENSMUSG00000031486/ENSMUSG00000014773/ENSMUSG00000031714/ENSMUSG00000024620/ENSMUSG00000052957/ENSMUSG00000019647/ENSMUSG00000026883/ENSMUSG00000053477/ENSMUSG00000017774	Notch1/Vcam1/Cd63/Kdr/Pdgfra/Anxa1/Adgra2/Dll1/Gab1/Pdgfrb/Gas1/Sema6a/Dab2ip/Tcf4/Myo1c	15
BP	GO:0051208	sequestering of calcium ion	25|1439	118|16518	2.39474e-05	0.000342492	ENSMUSG00000037225/ENSMUSG00000034855/ENSMUSG00000027712/ENSMUSG00000034462/ENSMUSG00000003161/ENSMUSG00000027087/ENSMUSG00000026395/ENSMUSG00000028207/ENSMUSG00000039239/ENSMUSG00000029468/ENSMUSG00000042644/ENSMUSG00000006519/ENSMUSG00000016933/ENSMUSG00000042686/ENSMUSG00000048677/ENSMUSG00000042228/ENSMUSG00000018340/ENSMUSG00000004266/ENSMUSG00000079110/ENSMUSG00000031778/ENSMUSG00000079227/…	Fgf2/Cxcl10/Anxa5/Pkd2/Sri/Itgav/Ptprc/Asph/Tgfb2/P2rx7/Itpr3/Cyba/Plcg1/Jph1/Tpcn2/Lyn/Anxa6/Ptpn6/Capn3/Cx3cl1/Ccr5/Itpr1/Tpcn1/Slc8b1/Selenon	25
CC	GO:0070062	extracellular exosome	18|1463	72|16707	3.49695e-05	0.000346828	ENSMUSG00000037405/ENSMUSG00000055447/ENSMUSG00000025351/ENSMUSG00000030342/ENSMUSG00000024659/ENSMUSG00000007041/ENSMUSG00000003161/ENSMUSG00000028249/ENSMUSG00000027009/ENSMUSG00000069833/ENSMUSG00000008734/ENSMUSG00000016496/ENSMUSG00000032231/ENSMUSG00000026193/ENSMUSG00000030340/ENSMUSG00000016534/ENSMUSG00000033684/ENSMUSG00000022901	Icam1/Cd47/Cd63/Cd9/Anxa1/Clic1/Sri/Sdcbp/Itga4/Ahnak/Gprc5b/Cd274/Anxa2/Fn1/Scnn1a/Lamp2/Qsox1/Cd86	18
MF	GO:0030881	beta-2-microglobulin binding	7|1421	11|16303	9.0789e-06	0.000357103	ENSMUSG00000035929/ENSMUSG00000061232/ENSMUSG00000073411/ENSMUSG00000067212/ENSMUSG00000073409/ENSMUSG00000060550/ENSMUSG00000003420	H2-Q4/H2-K1/H2-D1/H2-T23/H2-Q6/H2-Q7/Fcgrt	7
MF	GO:0003779	actin binding	61|1421	398|16303	9.62016e-06	0.000363257	ENSMUSG00000026414/ENSMUSG00000025885/ENSMUSG00000055368/ENSMUSG00000022272/ENSMUSG00000068699/ENSMUSG00000053931/ENSMUSG00000037736/ENSMUSG00000049493/ENSMUSG00000038816/ENSMUSG00000031328/ENSMUSG00000037679/ENSMUSG00000043079/ENSMUSG00000031207/ENSMUSG00000051359/ENSMUSG00000021057/ENSMUSG00000029622/ENSMUSG00000020122/ENSMUSG00000035441/ENSMUSG00000021676/ENSMUSG00000024397/ENSMUSG00000034616/…	Tnnt2/Myo5b/Slc6a2/Myo10/Flnc/Cnn3/Limch1/Pls1/Ctnnal1/Flna/Inf2/Synpo/Msn/Ncald/Akap5/Arpc1b/Egfr/Myo1d/Iqgap2/Aif1/Ssh3/Cnn2/Sptbn4/Samd14/Palld/Lcp1/Fmnl2/Capg/Ctnna2/Tpm3/Espn/Aif1l/Sntb1/Adssl1/Ezr/Gsn/Zfp185/Ajuba/Anxa6/Ablim3/Pfn2/Pls3/Cobl/Itgb1/Ccr5/Dmtn/Mtss1l/Tpm4/Myo1c/Epb41l1/Ablim2/Plekhh2/Cap2/Arc/Dbn1/Ang/Antxr1/Lasp1/Inppl1/Ophn1/Flnb	61
BP	GO:0032956	regulation of actin cytoskeleton organization	49|1439	308|16518	2.62534e-05	0.000374489	ENSMUSG00000036995/ENSMUSG00000037405/ENSMUSG00000020388/ENSMUSG00000019997/ENSMUSG00000037736/ENSMUSG00000031328/ENSMUSG00000043079/ENSMUSG00000038235/ENSMUSG00000024621/ENSMUSG00000046718/ENSMUSG00000001313/ENSMUSG00000029622/ENSMUSG00000032194/ENSMUSG00000021676/ENSMUSG00000034616/ENSMUSG00000022469/ENSMUSG00000002233/ENSMUSG00000041959/ENSMUSG00000028919/ENSMUSG00000063531/ENSMUSG00000011751/…	Asap3/Icam1/Pdlim4/Ctgf/Limch1/Flna/Synpo/F11r/Csf1r/Bst2/Rnd2/Arpc1b/Kank2/Iqgap2/Ssh3/Rapgef3/Rhoc/S100a10/Arhgef19/Sema3e/Sptbn4/Tgfb2/Capg/Plek/Rnd3/Rock2/Arhgef10/Arhgef5/Nckap1l/Smad3/Myadm/Sh3pxd2b/Gsn/Cdc42ep4/Pfn2/Cx3cl1/Dmtn/Tmeff2/Rgs4/Arhgap6/Jam3/Vangl2/Myo1c/Plekhh2/Arpin/Slit2/Dbn1/Hck/Prkcq	49
BP	GO:0048705	skeletal system morphogenesis	36|1439	202|16518	2.70852e-05	0.000385345	ENSMUSG00000019997/ENSMUSG00000016918/ENSMUSG00000000957/ENSMUSG00000029231/ENSMUSG00000025921/ENSMUSG00000022483/ENSMUSG00000055737/ENSMUSG00000000567/ENSMUSG00000052957/ENSMUSG00000070436/ENSMUSG00000022324/ENSMUSG00000001521/ENSMUSG00000039239/ENSMUSG00000021464/ENSMUSG00000024076/ENSMUSG00000029468/ENSMUSG00000032440/ENSMUSG00000059049/ENSMUSG00000032231/ENSMUSG00000058756/ENSMUSG00000032402/…	Ctgf/Sulf1/Mmp14/Pdgfra/Rdh10/Col2a1/Ghr/Sox9/Gas1/Serpinh1/Matn2/Tulp3/Tgfb2/Ror2/Vit/P2rx7/Tgfbr2/Frem1/Anxa2/Thra/Smad3/Sh3pxd2b/Slc39a1/Sfrp1/Anxa6/Csrnp1/Plekha1/Csgalnact1/Bmp4/Fgfr2/Coch/Pcgf2/Col11a1/Arid5b/Inppl1/Lrp5	36
BP	GO:0032653	regulation of interleukin-10 production	13|1439	41|16518	2.72317e-05	0.00038642	ENSMUSG00000053175/ENSMUSG00000055447/ENSMUSG00000023915/ENSMUSG00000014773/ENSMUSG00000027995/ENSMUSG00000027718/ENSMUSG00000001123/ENSMUSG00000039005/ENSMUSG00000066551/ENSMUSG00000016496/ENSMUSG00000016494/ENSMUSG00000058715/ENSMUSG00000020101	Bcl3/Cd47/Tnfrsf21/Dll1/Tlr2/Il21/Lgals9/Tlr4/Hmgb1/Cd274/Cd34/Fcer1g/Vsir	13
MF	GO:0015081	sodium ion transmembrane transporter activity	27|1421	127|16303	1.08366e-05	0.000393452	ENSMUSG00000055368/ENSMUSG00000024935/ENSMUSG00000034810/ENSMUSG00000033161/ENSMUSG00000001985/ENSMUSG00000034462/ENSMUSG00000032412/ENSMUSG00000056073/ENSMUSG00000013275/ENSMUSG00000060961/ENSMUSG00000019558/ENSMUSG00000068323/ENSMUSG00000005360/ENSMUSG00000057182/ENSMUSG00000029843/ENSMUSG00000028542/ENSMUSG00000030340/ENSMUSG00000026904/ENSMUSG00000064329/ENSMUSG00000023033/ENSMUSG00000033998/…	Slc6a2/Slc1a1/Scn7a/Atp1a1/Grik3/Pkd2/Atp1b3/Grik2/Slc41a1/Slc4a4/Slc6a8/Slc4a5/Slc1a3/Scn3a/Slc13a4/Slc6a9/Scnn1a/Slc4a10/Scn1a/Scn8a/Kcnk1/Slc9a6/Scn3b/Slc6a1/Slc8b1/Slc5a7/Slc24a2	27
BP	GO:0032231	regulation of actin filament bundle assembly	22|1439	98|16518	2.83743e-05	0.000400084	ENSMUSG00000036995/ENSMUSG00000020388/ENSMUSG00000019997/ENSMUSG00000037736/ENSMUSG00000031328/ENSMUSG00000043079/ENSMUSG00000032194/ENSMUSG00000022469/ENSMUSG00000002233/ENSMUSG00000041959/ENSMUSG00000020120/ENSMUSG00000020580/ENSMUSG00000071176/ENSMUSG00000033542/ENSMUSG00000032402/ENSMUSG00000040711/ENSMUSG00000027805/ENSMUSG00000031778/ENSMUSG00000026109/ENSMUSG00000031355/ENSMUSG00000034675/…	Asap3/Pdlim4/Ctgf/Limch1/Flna/Synpo/Kank2/Rapgef3/Rhoc/S100a10/Plek/Rock2/Arhgef10/Arhgef5/Smad3/Sh3pxd2b/Pfn2/Cx3cl1/Tmeff2/Arhgap6/Dbn1/Prkcq	22
BP	GO:0014074	response to purine-containing compound	30|1439	156|16518	2.83759e-05	0.000400084	ENSMUSG00000032648/ENSMUSG00000052837/ENSMUSG00000026204/ENSMUSG00000018593/ENSMUSG00000026185/ENSMUSG00000003545/ENSMUSG00000022892/ENSMUSG00000034462/ENSMUSG00000022469/ENSMUSG00000025888/ENSMUSG00000076441/ENSMUSG00000051159/ENSMUSG00000028207/ENSMUSG00000029468/ENSMUSG00000035385/ENSMUSG00000042644/ENSMUSG00000027478/ENSMUSG00000052397/ENSMUSG00000021127/ENSMUSG00000022099/ENSMUSG00000036353/…	Pygm/Junb/Ptprn/Sparc/Igfbp5/Fosb/App/Pkd2/Rapgef3/Casp1/Ass1/Cited1/Asph/P2rx7/Ccl2/Itpr3/Dnmt3b/Ezr/Zfp36l1/Dmtn/P2ry12/Cib2/Itpr1/Ptgs2/Crhbp/Cnga3/Pik3cg/Slc6a1/Trpm4/Selenon	30
BP	GO:0090090	negative regulation of canonical Wnt signaling pathway	24|1439	112|16518	2.84149e-05	0.000400084	ENSMUSG00000026923/ENSMUSG00000007655/ENSMUSG00000020393/ENSMUSG00000002985/ENSMUSG00000027803/ENSMUSG00000044674/ENSMUSG00000032280/ENSMUSG00000000567/ENSMUSG00000040183/ENSMUSG00000021994/ENSMUSG00000021464/ENSMUSG00000027004/ENSMUSG00000042258/ENSMUSG00000030772/ENSMUSG00000078794/ENSMUSG00000034771/ENSMUSG00000031548/ENSMUSG00000053930/ENSMUSG00000026883/ENSMUSG00000025239/ENSMUSG00000008305/…	Notch1/Cav1/Kremen1/Apoe/Wwtr1/Fzd1/Tle3/Sox9/Ankrd6/Wnt5a/Ror2/Frzb/Isl1/Dkk3/Dact3/Tle2/Sfrp1/Shisa6/Dab2ip/Limd1/Tle1/Dact1/Fzd6/Sox2	24
BP	GO:0050806	positive regulation of synaptic transmission	33|1439	179|16518	2.85409e-05	0.000400823	ENSMUSG00000020932/ENSMUSG00000021701/ENSMUSG00000052336/ENSMUSG00000002985/ENSMUSG00000029838/ENSMUSG00000022892/ENSMUSG00000025892/ENSMUSG00000020122/ENSMUSG00000056073/ENSMUSG00000059714/ENSMUSG00000003352/ENSMUSG00000055254/ENSMUSG00000021464/ENSMUSG00000053550/ENSMUSG00000005360/ENSMUSG00000035385/ENSMUSG00000049112/ENSMUSG00000020524/ENSMUSG00000004113/ENSMUSG00000042644/ENSMUSG00000017314/…	Gfap/Plk2/Cx3cr1/Apoe/Ptn/App/Gria4/Egfr/Grik2/Flot1/Cacnb3/Ntrk2/Ror2/Shisa7/Slc1a3/Ccl2/Oxtr/Gria1/Cacna1b/Itpr3/Mpp2/Abat/Camk2b/Adora1/Rgs4/Cux2/S100b/Ptgs2/Arc/Dbn1/Serpine2/Slc24a2/Snap47	33
BP	GO:0050708	regulation of protein secretion	59|1439	395|16518	2.88443e-05	0.000404043	ENSMUSG00000020641/ENSMUSG00000040296/ENSMUSG00000026896/ENSMUSG00000023915/ENSMUSG00000067212/ENSMUSG00000024810/ENSMUSG00000024659/ENSMUSG00000024621/ENSMUSG00000027712/ENSMUSG00000015968/ENSMUSG00000020122/ENSMUSG00000031075/ENSMUSG00000055980/ENSMUSG00000003161/ENSMUSG00000033685/ENSMUSG00000025888/ENSMUSG00000027995/ENSMUSG00000002897/ENSMUSG00000026074/ENSMUSG00000021994/ENSMUSG00000001123/…	Rsad2/Ddx58/Ifih1/Tnfrsf21/H2-T23/Il33/Anxa1/Csf1r/Anxa5/Cacna1d/Egfr/Ano1/Irs1/Sri/Ucp2/Casp1/Tlr2/Il17ra/Map4k4/Wnt5a/Lgals9/Tgfb2/Oxct1/Tlr4/Cyp2j6/Hmgb1/P2rx7/Isl1/Cd274/Srcin1/P3h1/Ezr/Wls/Rhbdf1/Lyn/Cd300c2/Sfrp1/Abat/Cx3cl1/Cd276/Fn1/Abcc8/Ccr5/Idh2/Pde1c/Cd34/Rapgef4/Vsnl1/Anxa4/Midn/Ang/Arid5a/Sybu/Prkcq/Slc8b1/Trpm4/Il17rc/Syt11/Lrp5	59
BP	GO:0050920	regulation of chemotaxis	34|1439	187|16518	2.92999e-05	0.000409372	ENSMUSG00000037225/ENSMUSG00000028635/ENSMUSG00000026923/ENSMUSG00000031565/ENSMUSG00000014599/ENSMUSG00000062960/ENSMUSG00000029231/ENSMUSG00000034855/ENSMUSG00000041120/ENSMUSG00000031841/ENSMUSG00000031486/ENSMUSG00000045136/ENSMUSG00000041936/ENSMUSG00000024397/ENSMUSG00000064210/ENSMUSG00000063531/ENSMUSG00000021994/ENSMUSG00000066551/ENSMUSG00000035385/ENSMUSG00000040152/ENSMUSG00000022488/…	Fgf2/Edn2/Notch1/Fgfr1/Csf1/Kdr/Pdgfra/Cxcl10/Nbl1/Cdh13/Adgra2/Tubb2b/Agrn/Aif1/Ano6/Sema3e/Wnt5a/Hmgb1/Ccl2/Thbs1/Nckap1l/Smad3/Lyn/Ccl12/Sema6a/Cx3cl1/Fn1/P2ry12/Jam3/Sema4g/Efnb2/Slit2/Ripor2/Slc8b1	34
BP	GO:0010717	regulation of epithelial to mesenchymal transition	19|1439	78|16518	2.94735e-05	0.000410745	ENSMUSG00000026923/ENSMUSG00000028583/ENSMUSG00000048537/ENSMUSG00000027803/ENSMUSG00000028480/ENSMUSG00000026833/ENSMUSG00000028249/ENSMUSG00000039239/ENSMUSG00000026836/ENSMUSG00000032440/ENSMUSG00000042258/ENSMUSG00000027954/ENSMUSG00000032402/ENSMUSG00000078794/ENSMUSG00000031548/ENSMUSG00000063382/ENSMUSG00000026883/ENSMUSG00000021835/ENSMUSG00000021360	Notch1/Pdpn/Phldb1/Wwtr1/Glipr2/Olfm1/Sdcbp/Tgfb2/Acvr1/Tgfbr2/Isl1/Efna1/Smad3/Dact3/Sfrp1/Bcl9l/Dab2ip/Bmp4/Gcnt2	19
BP	GO:0002548	monocyte chemotaxis	14|1439	47|16518	2.97391e-05	0.000411909	ENSMUSG00000024659/ENSMUSG00000030669/ENSMUSG00000034855/ENSMUSG00000041120/ENSMUSG00000024397/ENSMUSG00000064210/ENSMUSG00000050335/ENSMUSG00000066551/ENSMUSG00000035385/ENSMUSG00000042228/ENSMUSG00000035352/ENSMUSG00000031778/ENSMUSG00000019122/ENSMUSG00000031558	Anxa1/Calca/Cxcl10/Nbl1/Aif1/Ano6/Lgals3/Hmgb1/Ccl2/Lyn/Ccl12/Cx3cl1/Ccl9/Slit2	14
BP	GO:0014009	glial cell proliferation	14|1439	47|16518	2.97391e-05	0.000411909	ENSMUSG00000020932/ENSMUSG00000026923/ENSMUSG00000022037/ENSMUSG00000026728/ENSMUSG00000024810/ENSMUSG00000019982/ENSMUSG00000029838/ENSMUSG00000036560/ENSMUSG00000042228/ENSMUSG00000031778/ENSMUSG00000040136/ENSMUSG00000030541/ENSMUSG00000041736/ENSMUSG00000021108	Gfap/Notch1/Clu/Vim/Il33/Myb/Ptn/Lgi4/Lyn/Cx3cl1/Abcc8/Idh2/Tspo/Prkch	14
BP	GO:0002705	positive regulation of leukocyte mediated immunity	27|1439	134|16518	2.98018e-05	0.000411909	ENSMUSG00000035929/ENSMUSG00000061232/ENSMUSG00000060802/ENSMUSG00000073411/ENSMUSG00000020641/ENSMUSG00000026072/ENSMUSG00000040296/ENSMUSG00000067212/ENSMUSG00000026395/ENSMUSG00000027718/ENSMUSG00000030124/ENSMUSG00000002147/ENSMUSG00000016206/ENSMUSG00000073409/ENSMUSG00000040511/ENSMUSG00000040663/ENSMUSG00000029468/ENSMUSG00000047139/ENSMUSG00000024164/ENSMUSG00000060550/ENSMUSG00000020919/…	H2-Q4/H2-K1/B2m/H2-D1/Rsad2/Il1r1/Ddx58/H2-T23/Ptprc/Il21/Lag3/Stat6/H2-M3/H2-Q6/Pvr/Clcf1/P2rx7/Cd24a/C3/H2-Q7/Stat5b/Fcer1g/H2-T22/Vav1/Fam49b/Stat5a/Arid5a	27
BP	GO:0060401	cytosolic calcium ion transport	31|1439	164|16518	2.98595e-05	0.000411909	ENSMUSG00000037225/ENSMUSG00000007655/ENSMUSG00000019997/ENSMUSG00000034855/ENSMUSG00000021057/ENSMUSG00000034462/ENSMUSG00000003161/ENSMUSG00000027087/ENSMUSG00000026395/ENSMUSG00000003352/ENSMUSG00000028207/ENSMUSG00000019843/ENSMUSG00000039239/ENSMUSG00000029468/ENSMUSG00000042644/ENSMUSG00000006519/ENSMUSG00000016933/ENSMUSG00000042686/ENSMUSG00000048677/ENSMUSG00000042228/ENSMUSG00000004266/…	Fgf2/Cav1/Ctgf/Cxcl10/Akap5/Pkd2/Sri/Itgav/Ptprc/Cacnb3/Asph/Fyn/Tgfb2/P2rx7/Itpr3/Cyba/Plcg1/Jph1/Tpcn2/Lyn/Ptpn6/Capn3/Cx3cl1/Cacna1g/Ccr5/Bmp4/Itpr1/Tpcn1/Trpm1/Slc8b1/Selenon	31
BP	GO:0045428	regulation of nitric oxide biosynthetic process	16|1439	59|16518	3.00722e-05	0.000413796	ENSMUSG00000022037/ENSMUSG00000037405/ENSMUSG00000007655/ENSMUSG00000052336/ENSMUSG00000055447/ENSMUSG00000034462/ENSMUSG00000024397/ENSMUSG00000076441/ENSMUSG00000000290/ENSMUSG00000016206/ENSMUSG00000039005/ENSMUSG00000028194/ENSMUSG00000032402/ENSMUSG00000041736/ENSMUSG00000016494/ENSMUSG00000032487	Clu/Icam1/Cav1/Cx3cr1/Cd47/Pkd2/Aif1/Ass1/Itgb2/H2-M3/Tlr4/Ddah1/Smad3/Tspo/Cd34/Ptgs2	16
BP	GO:0043032	positive regulation of macrophage activation	9|1439	21|16518	3.14973e-05	0.000430875	ENSMUSG00000024810/ENSMUSG00000034957/ENSMUSG00000022892/ENSMUSG00000021994/ENSMUSG00000001123/ENSMUSG00000039005/ENSMUSG00000040152/ENSMUSG00000059866/ENSMUSG00000015599	Il33/Cebpa/App/Wnt5a/Lgals9/Tlr4/Thbs1/Tnip2/Ttbk1	9
BP	GO:0072202	cell differentiation involved in metanephros development	9|1439	21|16518	3.14973e-05	0.000430875	ENSMUSG00000034394/ENSMUSG00000027803/ENSMUSG00000001761/ENSMUSG00000051159/ENSMUSG00000052911/ENSMUSG00000053110/ENSMUSG00000021835/ENSMUSG00000016494/ENSMUSG00000046743	Lif/Wwtr1/Smo/Cited1/Lamb2/Yap1/Bmp4/Cd34/Fat4	9
BP	GO:0034446	substrate adhesion-dependent cell spreading	20|1439	85|16518	3.15506e-05	0.000430875	ENSMUSG00000028583/ENSMUSG00000031328/ENSMUSG00000002602/ENSMUSG00000041498/ENSMUSG00000041075/ENSMUSG00000015647/ENSMUSG00000058325/ENSMUSG00000027087/ENSMUSG00000041959/ENSMUSG00000027009/ENSMUSG00000014361/ENSMUSG00000027954/ENSMUSG00000038453/ENSMUSG00000068566/ENSMUSG00000022425/ENSMUSG00000031548/ENSMUSG00000026193/ENSMUSG00000022099/ENSMUSG00000034675/ENSMUSG00000033420	Pdpn/Flna/Axl/Kif14/Fzd7/Lama5/Dock1/Itgav/S100a10/Itga4/Mertk/Efna1/Srcin1/Myadm/Enpp2/Sfrp1/Fn1/Dmtn/Dbn1/Antxr1	20
BP	GO:0090596	sensory organ morphogenesis	42|1439	252|16518	3.21463e-05	0.000437914	ENSMUSG00000037225/ENSMUSG00000004040/ENSMUSG00000021557/ENSMUSG00000031565/ENSMUSG00000020467/ENSMUSG00000022656/ENSMUSG00000043850/ENSMUSG00000053279/ENSMUSG00000027168/ENSMUSG00000029838/ENSMUSG00000075012/ENSMUSG00000022483/ENSMUSG00000034739/ENSMUSG00000000567/ENSMUSG00000027204/ENSMUSG00000014773/ENSMUSG00000024992/ENSMUSG00000038805/ENSMUSG00000026837/ENSMUSG00000052957/ENSMUSG00000023972/…	Fgf2/Stat3/Agtpbp1/Fgfr1/Efemp1/Nectin3/Clrn1/Aldh1a1/Pax6/Ptn/Fjx1/Col2a1/Mfrp/Sox9/Fbn1/Dll1/Pde6c/Six3/Col5a1/Gas1/Ptk7/Otx1/Kcnq4/Wnt5a/Ntrk2/Ror2/Frzb/Epha2/Arl6/Aqp5/Bmp4/Abr/Zic1/Lrig1/Vsx2/Vangl2/Cnga3/Ripor2/Trpm1/Col11a1/Fzd6/Lrp5	42
BP	GO:0010595	positive regulation of endothelial cell migration	21|1439	92|16518	3.28767e-05	0.000446745	ENSMUSG00000037225/ENSMUSG00000031565/ENSMUSG00000021701/ENSMUSG00000028517/ENSMUSG00000062960/ENSMUSG00000046768/ENSMUSG00000018593/ENSMUSG00000024659/ENSMUSG00000031486/ENSMUSG00000022475/ENSMUSG00000021994/ENSMUSG00000066551/ENSMUSG00000020580/ENSMUSG00000015305/ENSMUSG00000040152/ENSMUSG00000016933/ENSMUSG00000021835/ENSMUSG00000032487/ENSMUSG00000004043/ENSMUSG00000005413/ENSMUSG00000013076	Fgf2/Fgfr1/Plk2/Plpp3/Kdr/Rhoj/Sparc/Anxa1/Adgra2/Hdac7/Wnt5a/Hmgb1/Rock2/Sash1/Thbs1/Plcg1/Bmp4/Ptgs2/Stat5a/Hmox1/Amotl1	21
BP	GO:0070555	response to interleukin-1	24|1439	113|16518	3.3143e-05	0.000449244	ENSMUSG00000064246/ENSMUSG00000020227/ENSMUSG00000026072/ENSMUSG00000028163/ENSMUSG00000024659/ENSMUSG00000018899/ENSMUSG00000024952/ENSMUSG00000055737/ENSMUSG00000000567/ENSMUSG00000051159/ENSMUSG00000035385/ENSMUSG00000006519/ENSMUSG00000056501/ENSMUSG00000059866/ENSMUSG00000059883/ENSMUSG00000035352/ENSMUSG00000031548/ENSMUSG00000031392/ENSMUSG00000032508/ENSMUSG00000031778/ENSMUSG00000060477/…	Chil1/Irak3/Il1r1/Nfkb1/Anxa1/Irf1/Rps6ka4/Ghr/Sox9/Cited1/Ccl2/Cyba/Cebpb/Tnip2/Irak4/Ccl12/Sfrp1/Irak1/Myd88/Cx3cl1/Irak2/Fn1/Dab2ip/Ccl9	24
CC	GO:1903561	extracellular vesicle	19|1463	80|16707	4.61958e-05	0.000450782	ENSMUSG00000037405/ENSMUSG00000055447/ENSMUSG00000025351/ENSMUSG00000030342/ENSMUSG00000024659/ENSMUSG00000007041/ENSMUSG00000003161/ENSMUSG00000028249/ENSMUSG00000027009/ENSMUSG00000069833/ENSMUSG00000008734/ENSMUSG00000016496/ENSMUSG00000032231/ENSMUSG00000026193/ENSMUSG00000030340/ENSMUSG00000016534/ENSMUSG00000022602/ENSMUSG00000033684/ENSMUSG00000022901	Icam1/Cd47/Cd63/Cd9/Anxa1/Clic1/Sri/Sdcbp/Itga4/Ahnak/Gprc5b/Cd274/Anxa2/Fn1/Scnn1a/Lamp2/Arc/Qsox1/Cd86	19
BP	GO:0060047	heart contraction	35|1439	196|16518	3.33605e-05	0.00045107	ENSMUSG00000028635/ENSMUSG00000026414/ENSMUSG00000007655/ENSMUSG00000019997/ENSMUSG00000024935/ENSMUSG00000031328/ENSMUSG00000030669/ENSMUSG00000019789/ENSMUSG00000033161/ENSMUSG00000064179/ENSMUSG00000044080/ENSMUSG00000052920/ENSMUSG00000015968/ENSMUSG00000003161/ENSMUSG00000010066/ENSMUSG00000041936/ENSMUSG00000053965/ENSMUSG00000011751/ENSMUSG00000039239/ENSMUSG00000062373/ENSMUSG00000030409/…	Edn2/Tnnt2/Cav1/Ctgf/Slc1a1/Flna/Calca/Hey2/Atp1a1/Tnnt1/S100a1/Prkg1/Cacna1d/Sri/Cacna2d2/Agrn/Pde5a/Sptbn4/Tgfb2/Tmem65/Dmpk/Kcne1l/Cacna1b/Thra/Kcna5/Cacna1g/Adora1/Rgs4/Scn1a/Jup/Scn3b/Spx/Trpm4/Nos1ap/Pde4b	35
BP	GO:0071560	cellular response to transforming growth factor beta stimulus	36|1439	204|16518	3.36786e-05	0.000454245	ENSMUSG00000007655/ENSMUSG00000052336/ENSMUSG00000001507/ENSMUSG00000000567/ENSMUSG00000027204/ENSMUSG00000001827/ENSMUSG00000001870/ENSMUSG00000051159/ENSMUSG00000028249/ENSMUSG00000021994/ENSMUSG00000019843/ENSMUSG00000039239/ENSMUSG00000026836/ENSMUSG00000029860/ENSMUSG00000032440/ENSMUSG00000035385/ENSMUSG00000042834/ENSMUSG00000040152/ENSMUSG00000032402/ENSMUSG00000029287/ENSMUSG00000051910/…	Cav1/Cx3cr1/Itga3/Sox9/Fbn1/Folr1/Ltbp1/Cited1/Sdcbp/Wnt5a/Fyn/Tgfb2/Acvr1/Zyx/Tgfbr2/Ccl2/Nrep/Thbs1/Smad3/Tgfbr3/Sox6/Zfp36l1/Htra3/Sfrp1/Pmepa1/Bcl9l/Fgfr2/Col1a2/Onecut2/Gcnt2/Cav2/Ptprk/Emilin1/Dbn1/Itgb5/Col4a2	36
CC	GO:0033267	axon part	63|1463	435|16707	4.76374e-05	0.00045747	ENSMUSG00000022037/ENSMUSG00000009418/ENSMUSG00000031328/ENSMUSG00000028599/ENSMUSG00000001507/ENSMUSG00000017466/ENSMUSG00000026204/ENSMUSG00000030669/ENSMUSG00000001985/ENSMUSG00000027712/ENSMUSG00000022892/ENSMUSG00000021068/ENSMUSG00000025892/ENSMUSG00000031517/ENSMUSG00000035441/ENSMUSG00000003161/ENSMUSG00000041936/ENSMUSG00000022469/ENSMUSG00000056073/ENSMUSG00000001761/ENSMUSG00000026833/…	Clu/Nav1/Flna/Tnfrsf1b/Itga3/Timp2/Ptprn/Calca/Grik3/Anxa5/App/Nin/Gria4/Gpm6a/Myo1d/Sri/Agrn/Rapgef3/Grik2/Smo/Olfm1/Adgrl1/Sptbn4/Itga4/Cntnap1/Ntrk2/Mgll/Palld/Ptprz1/Mapk8ip1/Ccl2/Gria1/Cacna1b/Tpm3/Lamp5/Flrt3/Gria3/Kif5a/Crtac1/Ptprf/Stmn2/Ptprn2/Trim46/Cobl/Boc/Adora1/Gap43/Sept5/Rapgef4/Scn1a/Slc9a6/Fez1/Crhbp/Dbn1/Ang/Unc13c/Cnga3/Sybu/Csnk1e/Syt11/Ophn1/Gabrb3/Ctsz	63
BP	GO:0046683	response to organophosphorus	27|1439	135|16518	3.4212e-05	0.000460299	ENSMUSG00000032648/ENSMUSG00000052837/ENSMUSG00000026204/ENSMUSG00000018593/ENSMUSG00000026185/ENSMUSG00000003545/ENSMUSG00000022892/ENSMUSG00000034462/ENSMUSG00000022469/ENSMUSG00000025888/ENSMUSG00000076441/ENSMUSG00000051159/ENSMUSG00000028207/ENSMUSG00000029468/ENSMUSG00000035385/ENSMUSG00000042644/ENSMUSG00000052397/ENSMUSG00000021127/ENSMUSG00000022099/ENSMUSG00000036353/ENSMUSG00000037493/…	Pygm/Junb/Ptprn/Sparc/Igfbp5/Fosb/App/Pkd2/Rapgef3/Casp1/Ass1/Cited1/Asph/P2rx7/Ccl2/Itpr3/Ezr/Zfp36l1/Dmtn/P2ry12/Cib2/Itpr1/Ptgs2/Crhbp/Cnga3/Pik3cg/Trpm4	27
BP	GO:0046633	alpha-beta T cell proliferation	11|1439	31|16518	3.46933e-05	0.000465626	ENSMUSG00000067212/ENSMUSG00000018899/ENSMUSG00000026395/ENSMUSG00000001123/ENSMUSG00000027223/ENSMUSG00000032440/ENSMUSG00000016496/ENSMUSG00000052142/ENSMUSG00000047139/ENSMUSG00000020143/ENSMUSG00000020101	H2-T23/Irf1/Ptprc/Lgals9/Mapk8ip1/Tgfbr2/Cd274/Rasal3/Cd24a/Dock2/Vsir	11
BP	GO:0044843	cell cycle G1/S phase transition	32|1439	173|16518	3.50231e-05	0.000468896	ENSMUSG00000057469/ENSMUSG00000028583/ENSMUSG00000022893/ENSMUSG00000021701/ENSMUSG00000041498/ENSMUSG00000019982/ENSMUSG00000024659/ENSMUSG00000020122/ENSMUSG00000034462/ENSMUSG00000032194/ENSMUSG00000024397/ENSMUSG00000040479/ENSMUSG00000052957/ENSMUSG00000000184/ENSMUSG00000026932/ENSMUSG00000026836/ENSMUSG00000047409/ENSMUSG00000022216/ENSMUSG00000045534/ENSMUSG00000023092/ENSMUSG00000017412/…	E2f6/Pdpn/Adamts1/Plk2/Kif14/Myb/Anxa1/Egfr/Pkd2/Kank2/Aif1/Dgkz/Gas1/Ccnd2/Nacc2/Acvr1/Ctdspl/Psme1/Kcna5/Fhl1/Cacnb4/Ccl12/Ptpn6/Itgb1/Camk2b/Klf11/Id4/Camk2a/Ctdsp1/Cdkn1a/Camk2g/Dact1	32
BP	GO:0042832	defense response to protozoan	10|1439	26|16518	3.52702e-05	0.000469896	ENSMUSG00000028270/ENSMUSG00000053175/ENSMUSG00000040253/ENSMUSG00000029298/ENSMUSG00000028268/ENSMUSG00000069874/ENSMUSG00000104713/ENSMUSG00000041515/ENSMUSG00000026177/ENSMUSG00000047810	Gbp2/Bcl3/Gbp7/Gbp9/Gbp3/Irgm2/Gbp6/Irf8/Slc11a1/Ccdc88b	10
BP	GO:1902991	regulation of amyloid precursor protein catabolic process	10|1439	26|16518	3.52702e-05	0.000469896	ENSMUSG00000022037/ENSMUSG00000002985/ENSMUSG00000022892/ENSMUSG00000038156/ENSMUSG00000061981/ENSMUSG00000020580/ENSMUSG00000027954/ENSMUSG00000039934/ENSMUSG00000042228/ENSMUSG00000022433	Clu/Apoe/App/Spon1/Flot2/Rock2/Efna1/Gsap/Lyn/Csnk1e	10
CC	GO:0005913	cell-cell adherens junction	21|1463	94|16707	4.98442e-05	0.000471033	ENSMUSG00000022656/ENSMUSG00000006411/ENSMUSG00000031841/ENSMUSG00000031673/ENSMUSG00000059714/ENSMUSG00000061981/ENSMUSG00000052062/ENSMUSG00000040511/ENSMUSG00000035776/ENSMUSG00000029860/ENSMUSG00000049112/ENSMUSG00000063063/ENSMUSG00000000325/ENSMUSG00000041598/ENSMUSG00000042228/ENSMUSG00000039546/ENSMUSG00000066842/ENSMUSG00000001552/ENSMUSG00000061048/ENSMUSG00000027111/ENSMUSG00000040972	Nectin3/Nectin4/Cdh13/Cdh11/Flot1/Flot2/Pard3b/Pvr/Cd99l2/Zyx/Oxtr/Ctnna2/Arvcf/Cdc42ep4/Lyn/Ajap1/Hmcn1/Jup/Cdh3/Itga6/Igsf21	21
CC	GO:0032590	dendrite membrane	13|1463	43|16707	5.06068e-05	0.000471033	ENSMUSG00000021057/ENSMUSG00000015968/ENSMUSG00000035863/ENSMUSG00000053550/ENSMUSG00000020524/ENSMUSG00000027270/ENSMUSG00000017314/ENSMUSG00000028173/ENSMUSG00000053930/ENSMUSG00000004631/ENSMUSG00000010803/ENSMUSG00000020436/ENSMUSG00000096883	Akap5/Cacna1d/Palm/Shisa7/Gria1/Lamp5/Mpp2/Wls/Shisa6/Sgce/Gabra1/Gabrg2/Shisa8	13
CC	GO:0099568	cytoplasmic region	68|1463	481|16707	5.23495e-05	0.00047987	ENSMUSG00000022272/ENSMUSG00000007655/ENSMUSG00000019997/ENSMUSG00000049493/ENSMUSG00000031328/ENSMUSG00000048537/ENSMUSG00000046768/ENSMUSG00000032359/ENSMUSG00000001313/ENSMUSG00000001985/ENSMUSG00000018398/ENSMUSG00000034462/ENSMUSG00000006356/ENSMUSG00000027479/ENSMUSG00000022469/ENSMUSG00000056073/ENSMUSG00000002233/ENSMUSG00000059714/ENSMUSG00000024143/ENSMUSG00000101337/ENSMUSG00000001521/…	Myo10/Cav1/Ctgf/Pls1/Flna/Phldb1/Rhoj/Ctsh/Rnd2/Grik3/Sept8/Pkd2/Crip2/Mapre1/Rapgef3/Grik2/Rhoc/Flot1/Rhoq/Dnah7c/Tulp3/Sptbn4/Cd302/Asph/Flot2/Pard3b/Gucy1b1/Rnd3/Rai14/Anxa2/Tpm3/Rasal3/Kif5a/Myadm/Sept3/Ezr/Wls/Gsn/Cltb/Ift57/Trim46/Cobl/Gnai1/Tnfaip2/Arl6/Dmtn/Cdc42se1/Fnbp1/Mtss1l/Fgfr2/Sept9/Sept5/Cib2/Prkar1a/Tpm4/Rhobtb3/Hmcn1/Plekhh2/Camk2a/Erc1/Cap2/Arc/Dbn1/Unc13c/Sybu/Lasp1/Flnb/Ctsz	68
BP	GO:0046330	positive regulation of JNK cascade	25|1439	121|16518	3.74088e-05	0.000497172	ENSMUSG00000015312/ENSMUSG00000019997/ENSMUSG00000030339/ENSMUSG00000022892/ENSMUSG00000032554/ENSMUSG00000031714/ENSMUSG00000021994/ENSMUSG00000039005/ENSMUSG00000021464/ENSMUSG00000066551/ENSMUSG00000027223/ENSMUSG00000015305/ENSMUSG00000033542/ENSMUSG00000027540/ENSMUSG00000041390/ENSMUSG00000038058/ENSMUSG00000031392/ENSMUSG00000032508/ENSMUSG00000026883/ENSMUSG00000026556/ENSMUSG00000071369/…	Gadd45b/Ctgf/Ltbr/App/Trf/Gab1/Wnt5a/Tlr4/Ror2/Hmgb1/Mapk8ip1/Sash1/Arhgef5/Ptpn1/Mdfic/Nod1/Irak1/Myd88/Dab2ip/Vangl2/Map3k5/Tirap/Map3k9/Rassf2/Zeb2	25
BP	GO:0034109	homotypic cell-cell adhesion	16|1439	60|16518	3.77249e-05	0.000500153	ENSMUSG00000028583/ENSMUSG00000028517/ENSMUSG00000029231/ENSMUSG00000030342/ENSMUSG00000052920/ENSMUSG00000020120/ENSMUSG00000047139/ENSMUSG00000042228/ENSMUSG00000068220/ENSMUSG00000004266/ENSMUSG00000057880/ENSMUSG00000022099/ENSMUSG00000036353/ENSMUSG00000001552/ENSMUSG00000026778/ENSMUSG00000026249	Pdpn/Plpp3/Pdgfra/Cd9/Prkg1/Plek/Cd24a/Lyn/Lgals1/Ptpn6/Abat/Dmtn/P2ry12/Jup/Prkcq/Serpine2	16
BP	GO:2000027	regulation of organ morphogenesis	31|1439	166|16518	3.81082e-05	0.000504008	ENSMUSG00000037225/ENSMUSG00000026923/ENSMUSG00000031565/ENSMUSG00000016918/ENSMUSG00000014599/ENSMUSG00000034394/ENSMUSG00000029231/ENSMUSG00000029838/ENSMUSG00000044674/ENSMUSG00000006800/ENSMUSG00000037211/ENSMUSG00000000567/ENSMUSG00000001761/ENSMUSG00000051159/ENSMUSG00000040183/ENSMUSG00000023972/ENSMUSG00000021994/ENSMUSG00000024014/ENSMUSG00000039239/ENSMUSG00000026836/ENSMUSG00000008575/…	Fgf2/Notch1/Fgfr1/Sulf1/Csf1/Lif/Pdgfra/Ptn/Fzd1/Sulf2/Spry1/Sox9/Smo/Cited1/Ankrd6/Ptk7/Wnt5a/Pim1/Tgfb2/Acvr1/Nfib/Ror2/Tgfbr2/Isl1/Sfrp1/Bmp4/Cd34/Vangl2/Ajap1/Dact1/Fzd6	31
BP	GO:1904062	regulation of cation transmembrane transport	48|1439	304|16518	3.84782e-05	0.000507669	ENSMUSG00000038642/ENSMUSG00000007655/ENSMUSG00000031328/ENSMUSG00000025351/ENSMUSG00000034855/ENSMUSG00000044080/ENSMUSG00000052920/ENSMUSG00000017400/ENSMUSG00000015968/ENSMUSG00000034462/ENSMUSG00000003161/ENSMUSG00000032412/ENSMUSG00000041936/ENSMUSG00000064210/ENSMUSG00000022469/ENSMUSG00000003352/ENSMUSG00000028207/ENSMUSG00000019843/ENSMUSG00000039239/ENSMUSG00000069833/ENSMUSG00000053519/…	Ctss/Cav1/Flna/Cd63/Cxcl10/S100a1/Prkg1/Stac2/Cacna1d/Pkd2/Sri/Atp1b3/Agrn/Ano6/Rapgef3/Cacnb3/Asph/Fyn/Tgfb2/Ahnak/Kcnip1/Shisa7/Kcne1l/Cyba/Plcg1/Fhl1/Cacna1a/Cacnb4/Lyn/Gem/Ptpn6/Ptpn3/Shisa6/Capn3/Cx3cl1/Amigo1/Abcc8/Rgs4/Bmp4/Dapk1/Shisa8/Arc/Crhbp/Pik3cg/Scn3b/Selenon/Nos1ap/Pde4b	48
BP	GO:0060627	regulation of vesicle-mediated transport	65|1439	452|16518	3.85776e-05	0.000507752	ENSMUSG00000026923/ENSMUSG00000022037/ENSMUSG00000060802/ENSMUSG00000007655/ENSMUSG00000022912/ENSMUSG00000055447/ENSMUSG00000002985/ENSMUSG00000002602/ENSMUSG00000025351/ENSMUSG00000031207/ENSMUSG00000024659/ENSMUSG00000032562/ENSMUSG00000017978/ENSMUSG00000021057/ENSMUSG00000031837/ENSMUSG00000031841/ENSMUSG00000032554/ENSMUSG00000057729/ENSMUSG00000064210/ENSMUSG00000004665/ENSMUSG00000014773/…	Notch1/Clu/B2m/Cav1/Pros1/Cd47/Apoe/Axl/Cd63/Msn/Anxa1/Gnai2/Cadps2/Akap5/Necab2/Cdh13/Trf/Prtn3/Ano6/Cnn2/Dll1/Itgav/Lgals3/Ptprc/Gas1/Flot1/Sdcbp/Slc11a1/Trim9/Wnt5a/Lgals9/Hmgb1/Mertk/Ccl2/Inpp5f/Anxa2/Ptpn1/Nckap1l/Cyba/Cd151/Acsl3/C3/Ezr/Cacna1a/Lyn/Rab3d/Lrp1/Pfn2/Cacna1g/Itgb1/Dock2/Abr/Sept5/Rapgef4/Gm6970/Vsnl1/Fcer1g/Clip3/Ehd2/Rab8b/Hck/Hmox1/Syt11/Tbc1d4/Ophn1	65
BP	GO:0050663	cytokine secretion	33|1439	182|16518	4.03862e-05	0.000529548	ENSMUSG00000026923/ENSMUSG00000064246/ENSMUSG00000040296/ENSMUSG00000026896/ENSMUSG00000023915/ENSMUSG00000024810/ENSMUSG00000024659/ENSMUSG00000024621/ENSMUSG00000015243/ENSMUSG00000105504/ENSMUSG00000027087/ENSMUSG00000025888/ENSMUSG00000027995/ENSMUSG00000002897/ENSMUSG00000021994/ENSMUSG00000001123/ENSMUSG00000039005/ENSMUSG00000052914/ENSMUSG00000066551/ENSMUSG00000029468/ENSMUSG00000016496/…	Notch1/Chil1/Ddx58/Ifih1/Tnfrsf21/Il33/Anxa1/Csf1r/Abca1/Gbp5/Itgav/Casp1/Tlr2/Il17ra/Wnt5a/Lgals9/Tlr4/Cyp2j6/Hmgb1/P2rx7/Cd274/Ezr/Lyn/Cd300c2/Cx3cl1/Cd276/Fn1/Ccr5/Cd34/Anxa4/Arid5a/Il17rc/Syt11	33
BP	GO:0060560	developmental growth involved in morphogenesis	40|1439	238|16518	4.04279e-05	0.000529548	ENSMUSG00000026923/ENSMUSG00000003534/ENSMUSG00000014599/ENSMUSG00000002985/ENSMUSG00000056427/ENSMUSG00000070509/ENSMUSG00000025921/ENSMUSG00000001313/ENSMUSG00000037211/ENSMUSG00000022892/ENSMUSG00000021068/ENSMUSG00000000567/ENSMUSG00000001761/ENSMUSG00000026833/ENSMUSG00000023972/ENSMUSG00000063531/ENSMUSG00000027009/ENSMUSG00000021994/ENSMUSG00000033174/ENSMUSG00000052911/ENSMUSG00000032440/…	Notch1/Ddr1/Csf1/Apoe/Slit3/Rgma/Rdh10/Rnd2/Spry1/App/Nin/Sox9/Smo/Olfm1/Ptk7/Sema3e/Itga4/Wnt5a/Mgll/Lamb2/Tgfbr2/Plxna1/Flrt3/Yap1/Sema6a/Sfrp1/Trim46/Fn1/Cobl/Itgb1/Ccr5/Bmp4/Rims1/Vangl2/Sema4g/Ttl/Slc9a6/Slit2/Dbn1/Zeb2	40
CC	GO:0098562	cytoplasmic side of membrane	31|1463	169|16707	5.9993e-05	0.000535346	ENSMUSG00000020932/ENSMUSG00000024697/ENSMUSG00000023439/ENSMUSG00000001025/ENSMUSG00000031207/ENSMUSG00000029713/ENSMUSG00000032562/ENSMUSG00000021057/ENSMUSG00000017400/ENSMUSG00000034462/ENSMUSG00000026395/ENSMUSG00000025555/ENSMUSG00000024302/ENSMUSG00000019843/ENSMUSG00000036402/ENSMUSG00000053519/ENSMUSG00000000001/ENSMUSG00000027540/ENSMUSG00000052142/ENSMUSG00000048240/ENSMUSG00000052397/…	Gfap/Gna14/Gnb3/S100a6/Msn/Gnb2/Gnai2/Akap5/Stac2/Pkd2/Ptprc/Farp1/Dtna/Fyn/Gng12/Kcnip1/Gnai3/Ptpn1/Rasal3/Gng7/Ezr/Lyn/Gem/Ptpn3/Gnai1/Ajap1/Cav2/Jup/Hck/Esyt1/Litaf	31
CC	GO:0150034	distal axon	52|1463	342|16707	6.01711e-05	0.000535346	ENSMUSG00000022037/ENSMUSG00000031328/ENSMUSG00000001507/ENSMUSG00000017466/ENSMUSG00000026204/ENSMUSG00000030669/ENSMUSG00000001985/ENSMUSG00000027712/ENSMUSG00000022892/ENSMUSG00000021068/ENSMUSG00000025892/ENSMUSG00000031517/ENSMUSG00000003161/ENSMUSG00000041936/ENSMUSG00000022469/ENSMUSG00000056073/ENSMUSG00000001761/ENSMUSG00000026833/ENSMUSG00000013033/ENSMUSG00000027009/ENSMUSG00000055254/…	Clu/Flna/Itga3/Timp2/Ptprn/Calca/Grik3/Anxa5/App/Nin/Gria4/Gpm6a/Sri/Agrn/Rapgef3/Grik2/Smo/Olfm1/Adgrl1/Itga4/Ntrk2/Palld/Ptprz1/Mapk8ip1/Ccl2/Cacna1b/Tpm3/Lamp5/Flrt3/Gria3/Kif5a/Crtac1/Ptprf/Stmn2/Ptprn2/Cobl/Boc/Adora1/Gap43/Sept5/Rapgef4/Slc9a6/Fez1/Crhbp/Dbn1/Ang/Unc13c/Csnk1e/Syt11/Ophn1/Gabrb3/Ctsz	52
BP	GO:0003007	heart morphogenesis	39|1439	230|16518	4.10048e-05	0.000535816	ENSMUSG00000026414/ENSMUSG00000026923/ENSMUSG00000022893/ENSMUSG00000030123/ENSMUSG00000031328/ENSMUSG00000056427/ENSMUSG00000071350/ENSMUSG00000028195/ENSMUSG00000019789/ENSMUSG00000022483/ENSMUSG00000044674/ENSMUSG00000037211/ENSMUSG00000034462/ENSMUSG00000000567/ENSMUSG00000001827/ENSMUSG00000014773/ENSMUSG00000001761/ENSMUSG00000026837/ENSMUSG00000026833/ENSMUSG00000039116/ENSMUSG00000021994/…	Tnnt2/Notch1/Adamts1/Plxnd1/Flna/Slit3/Setdb2/Cyr61/Hey2/Col2a1/Fzd1/Spry1/Pkd2/Sox9/Folr1/Dll1/Smo/Col5a1/Olfm1/Adgrg6/Wnt5a/Pim1/Tgfb2/Acvr1/Notch2/Tgfbr2/Isl1/Efna1/Tead2/Smad3/Tgfbr3/Yap1/Ift57/Bmp4/Fat4/Vangl2/Zmiz1/Slit2/Col11a1	39
BP	GO:0090257	regulation of muscle system process	38|1439	222|16518	4.14245e-05	0.000540005	ENSMUSG00000028635/ENSMUSG00000026414/ENSMUSG00000026923/ENSMUSG00000030341/ENSMUSG00000035200/ENSMUSG00000007655/ENSMUSG00000019997/ENSMUSG00000031328/ENSMUSG00000028599/ENSMUSG00000030669/ENSMUSG00000026185/ENSMUSG00000033161/ENSMUSG00000064179/ENSMUSG00000052920/ENSMUSG00000003161/ENSMUSG00000041936/ENSMUSG00000024397/ENSMUSG00000053965/ENSMUSG00000050730/ENSMUSG00000028063/ENSMUSG00000049112/…	Edn2/Tnnt2/Notch1/Tnfrsf1a/Chrnb4/Cav1/Ctgf/Flna/Tnfrsf1b/Calca/Igfbp5/Atp1a1/Tnnt1/Prkg1/Sri/Agrn/Aif1/Pde5a/Arhgap42/Lmna/Oxtr/Dmpk/Smad3/Ptgs1/Anxa6/Abat/Abcc8/Adora1/Rgs4/Ptgs2/Jup/Dbn1/Camk2g/Spx/Trpm4/Gucy1a1/Selenon/Pde4b	38
BP	GO:0001666	response to hypoxia	48|1439	305|16518	4.18955e-05	0.000544842	ENSMUSG00000026923/ENSMUSG00000032648/ENSMUSG00000036880/ENSMUSG00000007655/ENSMUSG00000027962/ENSMUSG00000000957/ENSMUSG00000019982/ENSMUSG00000029838/ENSMUSG00000028255/ENSMUSG00000031538/ENSMUSG00000026509/ENSMUSG00000032060/ENSMUSG00000033685/ENSMUSG00000025888/ENSMUSG00000027995/ENSMUSG00000032374/ENSMUSG00000039239/ENSMUSG00000032440/ENSMUSG00000028194/ENSMUSG00000028063/ENSMUSG00000035385/…	Notch1/Pygm/Acaa2/Cav1/Vcam1/Mmp14/Myb/Ptn/Clca1/Plat/Capn2/Cryab/Ucp2/Casp1/Tlr2/Plod2/Tgfb2/Tgfbr2/Ddah1/Lmna/Ccl2/Dnmt3b/Cyba/Smad3/Cd24a/Tgfbr3/Kcna5/Zfp36l1/Ajuba/Sfrp1/Irak1/Abat/Cpeb2/Limd1/Cygb/Adora1/Cd34/Sod3/Fosl2/Itpr1/S100b/Ptgs2/Npm1/Ndnf/Ang/Camk2g/Hmox1/Kcnk3	48
BP	GO:0070304	positive regulation of stress-activated protein kinase signaling cascade	28|1439	144|16518	4.21005e-05	0.000546203	ENSMUSG00000015312/ENSMUSG00000019997/ENSMUSG00000024079/ENSMUSG00000030339/ENSMUSG00000022892/ENSMUSG00000032554/ENSMUSG00000031714/ENSMUSG00000021994/ENSMUSG00000039239/ENSMUSG00000039005/ENSMUSG00000021464/ENSMUSG00000066551/ENSMUSG00000027223/ENSMUSG00000015305/ENSMUSG00000033542/ENSMUSG00000027540/ENSMUSG00000041390/ENSMUSG00000042228/ENSMUSG00000038058/ENSMUSG00000031392/ENSMUSG00000032508/…	Gadd45b/Ctgf/Eif2ak2/Ltbr/App/Trf/Gab1/Wnt5a/Tgfb2/Tlr4/Ror2/Hmgb1/Mapk8ip1/Sash1/Arhgef5/Ptpn1/Mdfic/Lyn/Nod1/Irak1/Myd88/Dab2ip/Vangl2/Map3k5/Tirap/Map3k9/Rassf2/Zeb2	28
BP	GO:0090263	positive regulation of canonical Wnt signaling pathway	20|1439	87|16518	4.51055e-05	0.000582417	ENSMUSG00000037225/ENSMUSG00000030309/ENSMUSG00000007655/ENSMUSG00000028163/ENSMUSG00000006800/ENSMUSG00000020122/ENSMUSG00000020140/ENSMUSG00000023972/ENSMUSG00000021464/ENSMUSG00000008734/ENSMUSG00000058756/ENSMUSG00000032402/ENSMUSG00000028173/ENSMUSG00000053110/ENSMUSG00000031548/ENSMUSG00000078202/ENSMUSG00000061048/ENSMUSG00000044548/ENSMUSG00000022433/ENSMUSG00000038260	Fgf2/Caprin2/Cav1/Nfkb1/Sulf2/Egfr/Lgr5/Ptk7/Ror2/Gprc5b/Thra/Smad3/Wls/Yap1/Sfrp1/Nrarp/Cdh3/Dact1/Csnk1e/Trpm4	20
BP	GO:1903426	regulation of reactive oxygen species biosynthetic process	20|1439	87|16518	4.51055e-05	0.000582417	ENSMUSG00000004040/ENSMUSG00000022037/ENSMUSG00000037405/ENSMUSG00000007655/ENSMUSG00000052336/ENSMUSG00000055447/ENSMUSG00000034462/ENSMUSG00000024397/ENSMUSG00000076441/ENSMUSG00000000290/ENSMUSG00000019843/ENSMUSG00000016206/ENSMUSG00000039005/ENSMUSG00000028194/ENSMUSG00000006519/ENSMUSG00000032402/ENSMUSG00000041736/ENSMUSG00000016494/ENSMUSG00000032487/ENSMUSG00000034730	Stat3/Clu/Icam1/Cav1/Cx3cr1/Cd47/Pkd2/Aif1/Ass1/Itgb2/Fyn/H2-M3/Tlr4/Ddah1/Cyba/Smad3/Tspo/Cd34/Ptgs2/Adgrb1	20
BP	GO:2000379	positive regulation of reactive oxygen species metabolic process	21|1439	94|16518	4.61882e-05	0.000594987	ENSMUSG00000022037/ENSMUSG00000037405/ENSMUSG00000024087/ENSMUSG00000032562/ENSMUSG00000020122/ENSMUSG00000034462/ENSMUSG00000024397/ENSMUSG00000076441/ENSMUSG00000000290/ENSMUSG00000016206/ENSMUSG00000039005/ENSMUSG00000032440/ENSMUSG00000000001/ENSMUSG00000028194/ENSMUSG00000040152/ENSMUSG00000006519/ENSMUSG00000032402/ENSMUSG00000041736/ENSMUSG00000032487/ENSMUSG00000023067/ENSMUSG00000034730	Clu/Icam1/Cyp1b1/Gnai2/Egfr/Pkd2/Aif1/Ass1/Itgb2/H2-M3/Tlr4/Tgfbr2/Gnai3/Ddah1/Thbs1/Cyba/Smad3/Tspo/Ptgs2/Cdkn1a/Adgrb1	21
BP	GO:0001704	formation of primary germ layer	22|1439	101|16518	4.63981e-05	0.000596281	ENSMUSG00000031565/ENSMUSG00000000957/ENSMUSG00000001507/ENSMUSG00000041075/ENSMUSG00000022895/ENSMUSG00000027087/ENSMUSG00000026837/ENSMUSG00000027009/ENSMUSG00000021994/ENSMUSG00000026836/ENSMUSG00000032402/ENSMUSG00000028173/ENSMUSG00000006445/ENSMUSG00000026193/ENSMUSG00000025809/ENSMUSG00000021835/ENSMUSG00000030849/ENSMUSG00000020612/ENSMUSG00000022817/ENSMUSG00000031503/ENSMUSG00000027966/…	Fgfr1/Mmp14/Itga3/Fzd7/Ets2/Itgav/Col5a1/Itga4/Wnt5a/Acvr1/Smad3/Wls/Epha2/Fn1/Itgb1/Bmp4/Fgfr2/Prkar1a/Itgb5/Col4a2/Col11a1/Sox2	22
CC	GO:0020003	symbiont-containing vacuole	6|1463	10|16707	6.87952e-05	0.000603204	ENSMUSG00000028270/ENSMUSG00000040253/ENSMUSG00000029298/ENSMUSG00000028268/ENSMUSG00000069874/ENSMUSG00000104713	Gbp2/Gbp7/Gbp9/Gbp3/Irgm2/Gbp6	6
BP	GO:0010463	mesenchymal cell proliferation	13|1439	43|16518	4.79327e-05	0.000614554	ENSMUSG00000031565/ENSMUSG00000029838/ENSMUSG00000000567/ENSMUSG00000001761/ENSMUSG00000052957/ENSMUSG00000021994/ENSMUSG00000008575/ENSMUSG00000066551/ENSMUSG00000032440/ENSMUSG00000028063/ENSMUSG00000021835/ENSMUSG00000046743/ENSMUSG00000024913	Fgfr1/Ptn/Sox9/Smo/Gas1/Wnt5a/Nfib/Hmgb1/Tgfbr2/Lmna/Bmp4/Fat4/Lrp5	13
BP	GO:0002475	antigen processing and presentation via MHC class Ib	9|1439	22|16518	4.91907e-05	0.000622984	ENSMUSG00000035929/ENSMUSG00000061232/ENSMUSG00000060802/ENSMUSG00000073411/ENSMUSG00000067212/ENSMUSG00000016206/ENSMUSG00000073409/ENSMUSG00000060550/ENSMUSG00000056116	H2-Q4/H2-K1/B2m/H2-D1/H2-T23/H2-M3/H2-Q6/H2-Q7/H2-T22	9
BP	GO:0046426	negative regulation of JAK-STAT cascade	9|1439	22|16518	4.91907e-05	0.000622984	ENSMUSG00000053175/ENSMUSG00000053113/ENSMUSG00000007655/ENSMUSG00000034422/ENSMUSG00000018899/ENSMUSG00000042105/ENSMUSG00000028399/ENSMUSG00000020027/ENSMUSG00000028519	Bcl3/Socs3/Cav1/Parp14/Irf1/Inpp5f/Ptprd/Socs2/Dab1	9
BP	GO:1904893	negative regulation of STAT cascade	9|1439	22|16518	4.91907e-05	0.000622984	ENSMUSG00000053175/ENSMUSG00000053113/ENSMUSG00000007655/ENSMUSG00000034422/ENSMUSG00000018899/ENSMUSG00000042105/ENSMUSG00000028399/ENSMUSG00000020027/ENSMUSG00000028519	Bcl3/Socs3/Cav1/Parp14/Irf1/Inpp5f/Ptprd/Socs2/Dab1	9
BP	GO:1990774	tumor necrosis factor secretion	9|1439	22|16518	4.91907e-05	0.000622984	ENSMUSG00000040296/ENSMUSG00000026896/ENSMUSG00000021994/ENSMUSG00000039005/ENSMUSG00000052914/ENSMUSG00000066551/ENSMUSG00000031778/ENSMUSG00000037447/ENSMUSG00000068923	Ddx58/Ifih1/Wnt5a/Tlr4/Cyp2j6/Hmgb1/Cx3cl1/Arid5a/Syt11	9
BP	GO:0002011	morphogenesis of an epithelial sheet	15|1439	55|16518	4.92762e-05	0.000622984	ENSMUSG00000026923/ENSMUSG00000005087/ENSMUSG00000028583/ENSMUSG00000003534/ENSMUSG00000031328/ENSMUSG00000028195/ENSMUSG00000002233/ENSMUSG00000026837/ENSMUSG00000021994/ENSMUSG00000051379/ENSMUSG00000025510/ENSMUSG00000022178/ENSMUSG00000026109/ENSMUSG00000026556/ENSMUSG00000032796	Notch1/Cd44/Pdpn/Ddr1/Flna/Cyr61/Rhoc/Col5a1/Wnt5a/Flrt3/Cd151/Ajuba/Tmeff2/Vangl2/Lama1	15
BP	GO:0051058	negative regulation of small GTPase mediated signal transduction	15|1439	55|16518	4.92762e-05	0.000622984	ENSMUSG00000022508/ENSMUSG00000001507/ENSMUSG00000017466/ENSMUSG00000037211/ENSMUSG00000040479/ENSMUSG00000050730/ENSMUSG00000039239/ENSMUSG00000052142/ENSMUSG00000004952/ENSMUSG00000032413/ENSMUSG00000032232/ENSMUSG00000025809/ENSMUSG00000026883/ENSMUSG00000031558/ENSMUSG00000036006	Bcl6/Itga3/Timp2/Spry1/Dgkz/Arhgap42/Tgfb2/Rasal3/Rasa4/Rasa2/Cgnl1/Itgb1/Dab2ip/Slit2/Ripor2	15
BP	GO:0001906	cell killing	25|1439	123|16518	4.98306e-05	0.000627657	ENSMUSG00000035929/ENSMUSG00000061232/ENSMUSG00000060802/ENSMUSG00000073411/ENSMUSG00000030560/ENSMUSG00000067212/ENSMUSG00000032359/ENSMUSG00000026395/ENSMUSG00000027718/ENSMUSG00000037321/ENSMUSG00000030124/ENSMUSG00000001123/ENSMUSG00000016206/ENSMUSG00000073409/ENSMUSG00000040511/ENSMUSG00000029468/ENSMUSG00000035385/ENSMUSG00000060550/ENSMUSG00000004266/ENSMUSG00000020919/ENSMUSG00000079227/…	H2-Q4/H2-K1/B2m/H2-D1/Ctsc/H2-T23/Ctsh/Ptprc/Il21/Tap1/Lag3/Lgals9/H2-M3/H2-Q6/Pvr/P2rx7/Ccl2/H2-Q7/Ptpn6/Stat5b/Ccr5/H2-T22/Vav1/Fam49b/Stat5a	25
BP	GO:0098656	anion transmembrane transport	39|1439	232|16518	4.99473e-05	0.000627657	ENSMUSG00000028583/ENSMUSG00000024935/ENSMUSG00000031596/ENSMUSG00000028255/ENSMUSG00000034714/ENSMUSG00000007041/ENSMUSG00000017765/ENSMUSG00000031075/ENSMUSG00000006576/ENSMUSG00000015243/ENSMUSG00000064210/ENSMUSG00000001827/ENSMUSG00000022462/ENSMUSG00000054720/ENSMUSG00000060961/ENSMUSG00000019558/ENSMUSG00000043885/ENSMUSG00000068323/ENSMUSG00000005360/ENSMUSG00000040152/ENSMUSG00000029843/…	Pdpn/Slc1a1/Slc7a2/Clca1/Ttyh2/Clic1/Slc12a4/Ano1/Slc4a3/Abca1/Ano6/Folr1/Slc38a2/Lrrc8c/Slc4a4/Slc6a8/Slc36a4/Slc4a5/Slc1a3/Thbs1/Slc13a4/Slc6a9/Slc1a4/Slc26a7/Slc38a8/Rgs4/Slc12a7/Gabra1/Slc4a10/Gabrg2/Slc26a1/Emb/Ttyh3/Mpc1/Arl6ip1/Slc16a12/Tcaf2/Bsnd/Gabrb3	39
BP	GO:0048872	homeostasis of number of cells	43|1439	265|16518	4.99914e-05	0.000627657	ENSMUSG00000004040/ENSMUSG00000026923/ENSMUSG00000060802/ENSMUSG00000022508/ENSMUSG00000014599/ENSMUSG00000040612/ENSMUSG00000002602/ENSMUSG00000035692/ENSMUSG00000044786/ENSMUSG00000019982/ENSMUSG00000024659/ENSMUSG00000026104/ENSMUSG00000000567/ENSMUSG00000001761/ENSMUSG00000024781/ENSMUSG00000024778/ENSMUSG00000039239/ENSMUSG00000040274/ENSMUSG00000066551/ENSMUSG00000014361/ENSMUSG00000029468/…	Stat3/Notch1/B2m/Bcl6/Csf1/Ildr2/Axl/Isg15/Zfp36/Myb/Anxa1/Stat1/Sox9/Smo/Lipa/Fas/Tgfb2/Cdk6/Hmgb1/Mertk/P2rx7/Ccl2/Gcnt4/Nckap1l/Thra/Lmo1/Cd24a/Sox6/Zfp36l1/Lyn/Gas2l1/Stat5b/Dmtn/Bmp4/Kitl/Jam3/Fcer1g/Stat5a/Rassf2/Hmox1/Ikzf1/Sfxn1/Pde4b	43
BP	GO:0071559	response to transforming growth factor beta	36|1439	208|16518	5.14334e-05	0.000642687	ENSMUSG00000007655/ENSMUSG00000052336/ENSMUSG00000001507/ENSMUSG00000000567/ENSMUSG00000027204/ENSMUSG00000001827/ENSMUSG00000001870/ENSMUSG00000051159/ENSMUSG00000028249/ENSMUSG00000021994/ENSMUSG00000019843/ENSMUSG00000039239/ENSMUSG00000026836/ENSMUSG00000029860/ENSMUSG00000032440/ENSMUSG00000035385/ENSMUSG00000042834/ENSMUSG00000040152/ENSMUSG00000032402/ENSMUSG00000029287/ENSMUSG00000051910/…	Cav1/Cx3cr1/Itga3/Sox9/Fbn1/Folr1/Ltbp1/Cited1/Sdcbp/Wnt5a/Fyn/Tgfb2/Acvr1/Zyx/Tgfbr2/Ccl2/Nrep/Thbs1/Smad3/Tgfbr3/Sox6/Zfp36l1/Htra3/Sfrp1/Pmepa1/Bcl9l/Fgfr2/Col1a2/Onecut2/Gcnt2/Cav2/Ptprk/Emilin1/Dbn1/Itgb5/Col4a2	36
BP	GO:0045577	regulation of B cell differentiation	10|1439	27|16518	5.16603e-05	0.000642687	ENSMUSG00000000957/ENSMUSG00000026395/ENSMUSG00000027718/ENSMUSG00000022488/ENSMUSG00000047139/ENSMUSG00000021127/ENSMUSG00000031548/ENSMUSG00000004266/ENSMUSG00000020919/ENSMUSG00000004043	Mmp14/Ptprc/Il21/Nckap1l/Cd24a/Zfp36l1/Sfrp1/Ptpn6/Stat5b/Stat5a	10
BP	GO:0045932	negative regulation of muscle contraction	10|1439	27|16518	5.16603e-05	0.000642687	ENSMUSG00000030669/ENSMUSG00000064179/ENSMUSG00000052920/ENSMUSG00000003161/ENSMUSG00000053965/ENSMUSG00000050730/ENSMUSG00000042429/ENSMUSG00000032487/ENSMUSG00000034675/ENSMUSG00000033910	Calca/Tnnt1/Prkg1/Sri/Pde5a/Arhgap42/Adora1/Ptgs2/Dbn1/Gucy1a1	10
BP	GO:0071604	transforming growth factor beta production	10|1439	27|16518	5.16603e-05	0.000642687	ENSMUSG00000019982/ENSMUSG00000024940/ENSMUSG00000039239/ENSMUSG00000040152/ENSMUSG00000032402/ENSMUSG00000047139/ENSMUSG00000031778/ENSMUSG00000016494/ENSMUSG00000032487/ENSMUSG00000061048	Myb/Ltbp3/Tgfb2/Thbs1/Smad3/Cd24a/Cx3cl1/Cd34/Ptgs2/Cdh3	10
CC	GO:0032591	dendritic spine membrane	7|1463	14|16707	7.69131e-05	0.000664749	ENSMUSG00000021057/ENSMUSG00000035863/ENSMUSG00000053550/ENSMUSG00000020524/ENSMUSG00000017314/ENSMUSG00000053930/ENSMUSG00000096883	Akap5/Palm/Shisa7/Gria1/Mpp2/Shisa6/Shisa8	7
BP	GO:0043010	camera-type eye development	47|1439	300|16518	5.62178e-05	0.000697792	ENSMUSG00000021557/ENSMUSG00000031502/ENSMUSG00000026728/ENSMUSG00000024087/ENSMUSG00000020467/ENSMUSG00000034394/ENSMUSG00000022656/ENSMUSG00000029231/ENSMUSG00000004891/ENSMUSG00000046768/ENSMUSG00000053279/ENSMUSG00000027168/ENSMUSG00000029838/ENSMUSG00000025921/ENSMUSG00000075012/ENSMUSG00000032060/ENSMUSG00000020122/ENSMUSG00000031517/ENSMUSG00000034739/ENSMUSG00000000567/ENSMUSG00000027204/…	Agtpbp1/Col4a1/Vim/Cyp1b1/Efemp1/Lif/Nectin3/Pdgfra/Nes/Rhoj/Aldh1a1/Pax6/Ptn/Rdh10/Fjx1/Cryab/Egfr/Gpm6a/Mfrp/Sox9/Fbn1/Dll1/Pde6c/Six3/Gas1/Tulp3/Ntrk2/Tgfb2/Lamb2/Mertk/Tgfbr2/Slc4a5/Neurod4/Smad3/Maf/Epha2/Mab21l2/Arl6/Aqp5/Bmp4/Vsx2/Ache/Lama1/Cnga3/Zeb2/Ndp/Lrp5	47
BP	GO:0002064	epithelial cell development	36|1439	209|16518	5.70335e-05	0.000706308	ENSMUSG00000067586/ENSMUSG00000026923/ENSMUSG00000030341/ENSMUSG00000037405/ENSMUSG00000031565/ENSMUSG00000026728/ENSMUSG00000031328/ENSMUSG00000031207/ENSMUSG00000043850/ENSMUSG00000027168/ENSMUSG00000038235/ENSMUSG00000000567/ENSMUSG00000014773/ENSMUSG00000022469/ENSMUSG00000038805/ENSMUSG00000001761/ENSMUSG00000021994/ENSMUSG00000058056/ENSMUSG00000040274/ENSMUSG00000052911/ENSMUSG00000068323/…	S1pr3/Notch1/Tnfrsf1a/Icam1/Fgfr1/Vim/Flna/Msn/Clrn1/Pax6/F11r/Sox9/Dll1/Rapgef3/Six3/Smo/Wnt5a/Palld/Cdk6/Lamb2/Slc4a5/Rock2/Myadm/Ezr/Ampd2/Epha2/Myd88/Bmp4/Onecut2/Col23a1/Fosl2/St14/Cdkn1a/Ripor2/Abcb1b/Flnb	36
CC	GO:0001725	stress fiber	17|1463	70|16707	8.48302e-05	0.00071281	ENSMUSG00000020388/ENSMUSG00000037736/ENSMUSG00000043079/ENSMUSG00000004665/ENSMUSG00000058056/ENSMUSG00000021998/ENSMUSG00000029860/ENSMUSG00000027940/ENSMUSG00000006519/ENSMUSG00000034201/ENSMUSG00000032735/ENSMUSG00000059248/ENSMUSG00000072214/ENSMUSG00000031799/ENSMUSG00000026556/ENSMUSG00000006219/ENSMUSG00000025278	Pdlim4/Limch1/Synpo/Cnn2/Palld/Lcp1/Zyx/Tpm3/Cyba/Gas2l1/Ablim3/Sept9/Sept5/Tpm4/Vangl2/Fblim1/Flnb	17
CC	GO:0097517	contractile actin filament bundle	17|1463	70|16707	8.48302e-05	0.00071281	ENSMUSG00000020388/ENSMUSG00000037736/ENSMUSG00000043079/ENSMUSG00000004665/ENSMUSG00000058056/ENSMUSG00000021998/ENSMUSG00000029860/ENSMUSG00000027940/ENSMUSG00000006519/ENSMUSG00000034201/ENSMUSG00000032735/ENSMUSG00000059248/ENSMUSG00000072214/ENSMUSG00000031799/ENSMUSG00000026556/ENSMUSG00000006219/ENSMUSG00000025278	Pdlim4/Limch1/Synpo/Cnn2/Palld/Lcp1/Zyx/Tpm3/Cyba/Gas2l1/Ablim3/Sept9/Sept5/Tpm4/Vangl2/Fblim1/Flnb	17
BP	GO:0042130	negative regulation of T cell proliferation	16|1439	62|16518	5.83384e-05	0.00072083	ENSMUSG00000023915/ENSMUSG00000053965/ENSMUSG00000001123/ENSMUSG00000016206/ENSMUSG00000016496/ENSMUSG00000056501/ENSMUSG00000047139/ENSMUSG00000073421/ENSMUSG00000062312/ENSMUSG00000004266/ENSMUSG00000035914/ENSMUSG00000021835/ENSMUSG00000020612/ENSMUSG00000020101/ENSMUSG00000036006/ENSMUSG00000022901	Tnfrsf21/Pde5a/Lgals9/H2-M3/Cd274/Cebpb/Cd24a/H2-Ab1/Erbb2/Ptpn6/Cd276/Bmp4/Prkar1a/Vsir/Ripor2/Cd86	16
BP	GO:0032612	interleukin-1 production	18|1439	75|16518	5.85494e-05	0.0007218	ENSMUSG00000067586/ENSMUSG00000052336/ENSMUSG00000024659/ENSMUSG00000015243/ENSMUSG00000105504/ENSMUSG00000025888/ENSMUSG00000021994/ENSMUSG00000001123/ENSMUSG00000039005/ENSMUSG00000066551/ENSMUSG00000029468/ENSMUSG00000042258/ENSMUSG00000032402/ENSMUSG00000026471/ENSMUSG00000038058/ENSMUSG00000031778/ENSMUSG00000079227/ENSMUSG00000062210	S1pr3/Cx3cr1/Anxa1/Abca1/Gbp5/Casp1/Wnt5a/Lgals9/Tlr4/Hmgb1/P2rx7/Isl1/Smad3/Mr1/Nod1/Cx3cl1/Ccr5/Tnfaip8	18
BP	GO:0001936	regulation of endothelial cell proliferation	24|1439	117|16518	5.99512e-05	0.000737413	ENSMUSG00000037225/ENSMUSG00000004040/ENSMUSG00000031565/ENSMUSG00000007655/ENSMUSG00000016918/ENSMUSG00000002985/ENSMUSG00000062960/ENSMUSG00000018593/ENSMUSG00000026104/ENSMUSG00000031841/ENSMUSG00000027009/ENSMUSG00000021994/ENSMUSG00000066551/ENSMUSG00000035385/ENSMUSG00000040152/ENSMUSG00000006519/ENSMUSG00000016933/ENSMUSG00000035352/ENSMUSG00000021835/ENSMUSG00000078202/ENSMUSG00000000058/…	Fgf2/Stat3/Fgfr1/Cav1/Sulf1/Apoe/Kdr/Sparc/Stat1/Cdh13/Itga4/Wnt5a/Hmgb1/Ccl2/Thbs1/Cyba/Plcg1/Ccl12/Bmp4/Nrarp/Cav2/Stat5a/Ang/Hmox1	24
BP	GO:0009913	epidermal cell differentiation	28|1439	147|16518	6.17654e-05	0.000756314	ENSMUSG00000026923/ENSMUSG00000031565/ENSMUSG00000043850/ENSMUSG00000044786/ENSMUSG00000027168/ENSMUSG00000024659/ENSMUSG00000002799/ENSMUSG00000019789/ENSMUSG00000014773/ENSMUSG00000021994/ENSMUSG00000039239/ENSMUSG00000058056/ENSMUSG00000020580/ENSMUSG00000040606/ENSMUSG00000042622/ENSMUSG00000047250/ENSMUSG00000021127/ENSMUSG00000053110/ENSMUSG00000006445/ENSMUSG00000021835/ENSMUSG00000021108/…	Notch1/Fgfr1/Clrn1/Zfp36/Pax6/Anxa1/Jag2/Hey2/Dll1/Wnt5a/Tgfb2/Palld/Rock2/Kazn/Maff/Ptgs1/Zfp36l1/Yap1/Epha2/Bmp4/Prkch/Fosl2/St14/Ptgs2/Irf6/Cdh3/Ripor2/Flnb	28
BP	GO:2001236	regulation of extrinsic apoptotic signaling pathway	28|1439	147|16518	6.17654e-05	0.000756314	ENSMUSG00000037405/ENSMUSG00000031565/ENSMUSG00000007655/ENSMUSG00000020044/ENSMUSG00000030339/ENSMUSG00000026628/ENSMUSG00000022483/ENSMUSG00000027087/ENSMUSG00000050335/ENSMUSG00000026395/ENSMUSG00000052957/ENSMUSG00000027375/ENSMUSG00000024778/ENSMUSG00000019843/ENSMUSG00000039239/ENSMUSG00000026836/ENSMUSG00000028124/ENSMUSG00000028063/ENSMUSG00000040152/ENSMUSG00000053110/ENSMUSG00000031548/…	Icam1/Fgfr1/Cav1/Timp3/Ltbr/Atf3/Col2a1/Itgav/Lgals3/Ptprc/Gas1/Mal/Fas/Fyn/Tgfb2/Acvr1/Gclm/Lmna/Thbs1/Yap1/Sfrp1/Sgk3/Cx3cl1/Bmp4/Tnfrsf22/Sp100/Itga6/Hmox1	28
BP	GO:0072006	nephron development	26|1439	132|16518	6.21992e-05	0.000759919	ENSMUSG00000037225/ENSMUSG00000026923/ENSMUSG00000016918/ENSMUSG00000034394/ENSMUSG00000001507/ENSMUSG00000027803/ENSMUSG00000029231/ENSMUSG00000024998/ENSMUSG00000006800/ENSMUSG00000015647/ENSMUSG00000034462/ENSMUSG00000000567/ENSMUSG00000014773/ENSMUSG00000024620/ENSMUSG00000001761/ENSMUSG00000051159/ENSMUSG00000052911/ENSMUSG00000047139/ENSMUSG00000027889/ENSMUSG00000038146/ENSMUSG00000053110/…	Fgf2/Notch1/Sulf1/Lif/Itga3/Wwtr1/Pdgfra/Plce1/Sulf2/Lama5/Pkd2/Sox9/Dll1/Pdgfrb/Smo/Cited1/Lamb2/Cd24a/Ampd2/Notch3/Yap1/Bmp4/Cd34/Fat4/Vangl2/Timeless	26
BP	GO:0032613	interleukin-10 production	13|1439	44|16518	6.26519e-05	0.000762031	ENSMUSG00000053175/ENSMUSG00000055447/ENSMUSG00000023915/ENSMUSG00000014773/ENSMUSG00000027995/ENSMUSG00000027718/ENSMUSG00000001123/ENSMUSG00000039005/ENSMUSG00000066551/ENSMUSG00000016496/ENSMUSG00000016494/ENSMUSG00000058715/ENSMUSG00000020101	Bcl3/Cd47/Tnfrsf21/Dll1/Tlr2/Il21/Lgals9/Tlr4/Hmgb1/Cd274/Cd34/Fcer1g/Vsir	13
BP	GO:2001222	regulation of neuron migration	13|1439	44|16518	6.26519e-05	0.000762031	ENSMUSG00000004040/ENSMUSG00000031328/ENSMUSG00000026072/ENSMUSG00000027168/ENSMUSG00000068748/ENSMUSG00000019647/ENSMUSG00000036606/ENSMUSG00000057897/ENSMUSG00000026883/ENSMUSG00000036334/ENSMUSG00000024617/ENSMUSG00000048385/ENSMUSG00000063626	Stat3/Flna/Il1r1/Pax6/Ptprz1/Sema6a/Plxnb2/Camk2b/Dab2ip/Igsf10/Camk2a/Scrt1/Unc5d	13
BP	GO:1903409	reactive oxygen species biosynthetic process	22|1439	103|16518	6.3528e-05	0.000767677	ENSMUSG00000004040/ENSMUSG00000022037/ENSMUSG00000037405/ENSMUSG00000024087/ENSMUSG00000007655/ENSMUSG00000052336/ENSMUSG00000055447/ENSMUSG00000031596/ENSMUSG00000034462/ENSMUSG00000024397/ENSMUSG00000076441/ENSMUSG00000000290/ENSMUSG00000019843/ENSMUSG00000016206/ENSMUSG00000039005/ENSMUSG00000028194/ENSMUSG00000006519/ENSMUSG00000032402/ENSMUSG00000041736/ENSMUSG00000016494/ENSMUSG00000032487/…	Stat3/Clu/Icam1/Cyp1b1/Cav1/Cx3cr1/Cd47/Slc7a2/Pkd2/Aif1/Ass1/Itgb2/Fyn/H2-M3/Tlr4/Ddah1/Cyba/Smad3/Tspo/Cd34/Ptgs2/Adgrb1	22
BP	GO:0042391	regulation of membrane potential	58|1439	397|16518	6.35647e-05	0.000767677	ENSMUSG00000035200/ENSMUSG00000007655/ENSMUSG00000031328/ENSMUSG00000062960/ENSMUSG00000034810/ENSMUSG00000029838/ENSMUSG00000007041/ENSMUSG00000033161/ENSMUSG00000001985/ENSMUSG00000074991/ENSMUSG00000022892/ENSMUSG00000015968/ENSMUSG00000031075/ENSMUSG00000032412/ENSMUSG00000041936/ENSMUSG00000056073/ENSMUSG00000033685/ENSMUSG00000025888/ENSMUSG00000017167/ENSMUSG00000003352/ENSMUSG00000055254/…	Chrnb4/Cav1/Flna/Kdr/Scn7a/Ptn/Clic1/Atp1a1/Grik3/Gabrr3/App/Cacna1d/Ano1/Atp1b3/Agrn/Grik2/Ucp2/Casp1/Cntnap1/Cacnb3/Ntrk2/P2rx7/Kcnip1/Gclm/Gria1/Dmpk/Kcne1l/Scn3a/Insyn1/Mpp2/Kcna5/Fhl1/Cacna1a/Cacnb4/Slc26a7/Ptpn3/Abat/Cx3cl1/Kcnt1/Sez6/Cacna1g/Adora1/Rgs4/Tspo/Rapgef4/Gabra1/Cux2/Gabrg2/Slc26a1/Scn1a/Kcnk1/Jup/Dbn1/Scn3b/Slc8b1/Trpm4/Nos1ap/Gabrb3	58
BP	GO:0030216	keratinocyte differentiation	20|1439	89|16518	6.36227e-05	0.000767677	ENSMUSG00000026923/ENSMUSG00000044786/ENSMUSG00000027168/ENSMUSG00000024659/ENSMUSG00000021994/ENSMUSG00000039239/ENSMUSG00000058056/ENSMUSG00000020580/ENSMUSG00000040606/ENSMUSG00000047250/ENSMUSG00000021127/ENSMUSG00000053110/ENSMUSG00000006445/ENSMUSG00000021108/ENSMUSG00000029135/ENSMUSG00000031995/ENSMUSG00000032487/ENSMUSG00000026638/ENSMUSG00000061048/ENSMUSG00000025278	Notch1/Zfp36/Pax6/Anxa1/Wnt5a/Tgfb2/Palld/Rock2/Kazn/Ptgs1/Zfp36l1/Yap1/Epha2/Prkch/Fosl2/St14/Ptgs2/Irf6/Cdh3/Flnb	20
BP	GO:0035272	exocrine system development	14|1439	50|16518	6.36795e-05	0.000767677	ENSMUSG00000031565/ENSMUSG00000030123/ENSMUSG00000023031/ENSMUSG00000037820/ENSMUSG00000027168/ENSMUSG00000015647/ENSMUSG00000020122/ENSMUSG00000000567/ENSMUSG00000039239/ENSMUSG00000008575/ENSMUSG00000030084/ENSMUSG00000028173/ENSMUSG00000042035/ENSMUSG00000032796	Fgfr1/Plxnd1/Cela1/Tgm2/Pax6/Lama5/Egfr/Sox9/Tgfb2/Nfib/Plxna1/Wls/Igsf3/Lama1	14
BP	GO:0032609	interferon-gamma production	21|1439	96|16518	6.41156e-05	0.000770728	ENSMUSG00000053175/ENSMUSG00000055447/ENSMUSG00000002602/ENSMUSG00000026072/ENSMUSG00000035692/ENSMUSG00000024810/ENSMUSG00000027718/ENSMUSG00000041515/ENSMUSG00000026177/ENSMUSG00000021994/ENSMUSG00000001123/ENSMUSG00000016206/ENSMUSG00000039005/ENSMUSG00000066551/ENSMUSG00000042258/ENSMUSG00000016496/ENSMUSG00000035914/ENSMUSG00000020101/ENSMUSG00000022378/ENSMUSG00000037447/ENSMUSG00000028525	Bcl3/Cd47/Axl/Il1r1/Isg15/Il33/Il21/Irf8/Slc11a1/Wnt5a/Lgals9/H2-M3/Tlr4/Hmgb1/Isl1/Cd274/Cd276/Vsir/Fam49b/Arid5a/Pde4b	21
BP	GO:0001502	cartilage condensation	8|1439	18|16518	6.42156e-05	0.000770728	ENSMUSG00000019997/ENSMUSG00000016918/ENSMUSG00000022483/ENSMUSG00000000567/ENSMUSG00000039239/ENSMUSG00000021464/ENSMUSG00000058756/ENSMUSG00000027966	Ctgf/Sulf1/Col2a1/Sox9/Tgfb2/Ror2/Thra/Col11a1	8
BP	GO:0051098	regulation of binding	55|1439	371|16518	6.54291e-05	0.000783568	ENSMUSG00000053175/ENSMUSG00000030309/ENSMUSG00000060802/ENSMUSG00000044646/ENSMUSG00000007655/ENSMUSG00000021701/ENSMUSG00000030123/ENSMUSG00000034394/ENSMUSG00000002985/ENSMUSG00000022906/ENSMUSG00000070509/ENSMUSG00000026796/ENSMUSG00000050069/ENSMUSG00000019789/ENSMUSG00000022892/ENSMUSG00000003161/ENSMUSG00000038156/ENSMUSG00000027479/ENSMUSG00000041936/ENSMUSG00000022469/ENSMUSG00000050335/…	Bcl3/Caprin2/B2m/Zbtb7c/Cav1/Plk2/Plxnd1/Lif/Apoe/Parp9/Rgma/Fam129b/Grem2/Hey2/App/Sri/Spon1/Mapre1/Agrn/Rapgef3/Lgals3/Dtx3l/S100a10/Smo/Flot1/Itga4/Wnt5a/Lgals9/Tgfb2/Tlr4/Nfib/Hmgb1/Isl1/Lfng/Ifit2/Anxa2/Smad3/Tgfbr3/Crtac1/Ptprf/Lrp1/Ttbk1/Dab2ip/Bmp4/Camk1/Tmem173/Id4/Tirap/Ripor2/Dzip1/Hmox1/Dact1/Csnk1e/Nfatc4/Ctsz	55
BP	GO:1902107	positive regulation of leukocyte differentiation	27|1439	140|16518	6.64135e-05	0.000793613	ENSMUSG00000022508/ENSMUSG00000014599/ENSMUSG00000034394/ENSMUSG00000000957/ENSMUSG00000002602/ENSMUSG00000019982/ENSMUSG00000024659/ENSMUSG00000024621/ENSMUSG00000018899/ENSMUSG00000037465/ENSMUSG00000041272/ENSMUSG00000026395/ENSMUSG00000027718/ENSMUSG00000001123/ENSMUSG00000016206/ENSMUSG00000021464/ENSMUSG00000066551/ENSMUSG00000022952/ENSMUSG00000032440/ENSMUSG00000032501/ENSMUSG00000022488/…	Bcl6/Csf1/Lif/Mmp14/Axl/Myb/Anxa1/Csf1r/Irf1/Klf10/Tox/Ptprc/Il21/Lgals9/H2-M3/Ror2/Hmgb1/Runx1/Tgfbr2/Trib1/Nckap1l/Zfp36l1/Stat5b/Kitl/Zmiz1/Vsir/Stat5a	27
BP	GO:0001765	membrane raft assembly	6|1439	10|16518	6.67976e-05	0.000796456	ENSMUSG00000007655/ENSMUSG00000041959/ENSMUSG00000059714/ENSMUSG00000061981/ENSMUSG00000032231/ENSMUSG00000000058	Cav1/S100a10/Flot1/Flot2/Anxa2/Cav2	6
MF	GO:0019956	chemokine binding	10|1421	25|16303	2.36366e-05	0.00079689	ENSMUSG00000030111/ENSMUSG00000028583/ENSMUSG00000052336/ENSMUSG00000044786/ENSMUSG00000037872/ENSMUSG00000027087/ENSMUSG00000027009/ENSMUSG00000066551/ENSMUSG00000025809/ENSMUSG00000079227	A2m/Pdpn/Cx3cr1/Zfp36/Ackr1/Itgav/Itga4/Hmgb1/Itgb1/Ccr5	10
MF	GO:0042605	peptide antigen binding	10|1421	25|16303	2.36366e-05	0.00079689	ENSMUSG00000035929/ENSMUSG00000061232/ENSMUSG00000073411/ENSMUSG00000067212/ENSMUSG00000037321/ENSMUSG00000016206/ENSMUSG00000073409/ENSMUSG00000073421/ENSMUSG00000060550/ENSMUSG00000056116	H2-Q4/H2-K1/H2-D1/H2-T23/Tap1/H2-M3/H2-Q6/H2-Ab1/H2-Q7/H2-T22	10
BP	GO:1902742	apoptotic process involved in development	11|1439	33|16518	6.73681e-05	0.000801504	ENSMUSG00000026923/ENSMUSG00000030341/ENSMUSG00000028599/ENSMUSG00000056427/ENSMUSG00000028195/ENSMUSG00000002799/ENSMUSG00000032060/ENSMUSG00000038805/ENSMUSG00000039239/ENSMUSG00000031558/ENSMUSG00000024913	Notch1/Tnfrsf1a/Tnfrsf1b/Slit3/Cyr61/Jag2/Cryab/Six3/Tgfb2/Slit2/Lrp5	11
BP	GO:0071900	regulation of protein serine/threonine kinase activity	61|1439	425|16518	6.99095e-05	0.000829928	ENSMUSG00000037225/ENSMUSG00000015312/ENSMUSG00000064246/ENSMUSG00000020227/ENSMUSG00000031565/ENSMUSG00000033327/ENSMUSG00000007655/ENSMUSG00000024079/ENSMUSG00000002985/ENSMUSG00000069874/ENSMUSG00000024998/ENSMUSG00000024621/ENSMUSG00000027499/ENSMUSG00000037211/ENSMUSG00000055737/ENSMUSG00000020122/ENSMUSG00000033170/ENSMUSG00000034462/ENSMUSG00000032554/ENSMUSG00000031714/ENSMUSG00000026395/…	Fgf2/Gadd45b/Chil1/Irak3/Fgfr1/Tnxb/Cav1/Eif2ak2/Apoe/Irgm2/Plce1/Csf1r/Pkia/Spry1/Ghr/Egfr/Card10/Pkd2/Trf/Gab1/Ptprc/Pde5a/Ccnd2/Wnt5a/Lgals9/Tlr4/Ptprj/Ror2/Mapk8ip1/P2rx7/Ccno/Sash1/Arhgef5/Trib1/Ptpn1/Thbs1/Dusp6/Cd24a/Mdfic/Lyn/Erbb2/Ajuba/Sfrp1/Irak1/Ptpn6/Dab2ip/Adora1/Bmp4/Camk1/Kitl/Map3k8/Prkar1a/Vangl2/Map3k5/Cdkn1a/Tirap/Map3k9/Pik3cg/Zeb2/Inppl1/Lrp5	61
BP	GO:0007249	I-kappaB kinase/NF-kappaB signaling	33|1439	187|16518	7.03378e-05	0.000830657	ENSMUSG00000053175/ENSMUSG00000030341/ENSMUSG00000031328/ENSMUSG00000052336/ENSMUSG00000037820/ENSMUSG00000029826/ENSMUSG00000018899/ENSMUSG00000026104/ENSMUSG00000030339/ENSMUSG00000025888/ENSMUSG00000027995/ENSMUSG00000021994/ENSMUSG00000019843/ENSMUSG00000039005/ENSMUSG00000008734/ENSMUSG00000020580/ENSMUSG00000052889/ENSMUSG00000059866/ENSMUSG00000059883/ENSMUSG00000038058/ENSMUSG00000022178/…	Bcl3/Tnfrsf1a/Flna/Cx3cr1/Tgm2/Zc3hav1/Irf1/Stat1/Ltbr/Casp1/Tlr2/Wnt5a/Fyn/Tlr4/Gprc5b/Rock2/Prkcb/Tnip2/Irak4/Nod1/Ajuba/Irak1/Capn3/Myd88/Cx3cl1/Irak2/Dab2ip/Tle1/S100b/Mid2/Erc1/Tirap/Litaf	33
BP	GO:0014032	neural crest cell development	18|1439	76|16518	7.05533e-05	0.000830657	ENSMUSG00000027168/ENSMUSG00000025921/ENSMUSG00000015647/ENSMUSG00000000567/ENSMUSG00000001827/ENSMUSG00000001761/ENSMUSG00000063531/ENSMUSG00000026836/ENSMUSG00000042258/ENSMUSG00000062432/ENSMUSG00000019647/ENSMUSG00000018340/ENSMUSG00000031217/ENSMUSG00000026193/ENSMUSG00000021835/ENSMUSG00000019966/ENSMUSG00000025207/ENSMUSG00000026872	Pax6/Rdh10/Lama5/Sox9/Folr1/Smo/Sema3e/Acvr1/Isl1/Cyp26c1/Sema6a/Anxa6/Efnb1/Fn1/Bmp4/Kitl/Sema4g/Zeb2	18
BP	GO:0070664	negative regulation of leukocyte proliferation	18|1439	76|16518	7.05533e-05	0.000830657	ENSMUSG00000023915/ENSMUSG00000053965/ENSMUSG00000001123/ENSMUSG00000016206/ENSMUSG00000016496/ENSMUSG00000056501/ENSMUSG00000047139/ENSMUSG00000073421/ENSMUSG00000042228/ENSMUSG00000062312/ENSMUSG00000035352/ENSMUSG00000004266/ENSMUSG00000035914/ENSMUSG00000021835/ENSMUSG00000020612/ENSMUSG00000020101/ENSMUSG00000036006/ENSMUSG00000022901	Tnfrsf21/Pde5a/Lgals9/H2-M3/Cd274/Cebpb/Cd24a/H2-Ab1/Lyn/Erbb2/Ccl12/Ptpn6/Cd276/Bmp4/Prkar1a/Vsir/Ripor2/Cd86	18
BP	GO:0060348	bone development	34|1439	195|16518	7.05807e-05	0.000830657	ENSMUSG00000016918/ENSMUSG00000000957/ENSMUSG00000018593/ENSMUSG00000022483/ENSMUSG00000006800/ENSMUSG00000030579/ENSMUSG00000055737/ENSMUSG00000000567/ENSMUSG00000027204/ENSMUSG00000064210/ENSMUSG00000026395/ENSMUSG00000028469/ENSMUSG00000070436/ENSMUSG00000022324/ENSMUSG00000001521/ENSMUSG00000056724/ENSMUSG00000024076/ENSMUSG00000027878/ENSMUSG00000032440/ENSMUSG00000059049/ENSMUSG00000032231/…	Sulf1/Mmp14/Sparc/Col2a1/Sulf2/Tyrobp/Ghr/Sox9/Fbn1/Ano6/Ptprc/Npr2/Serpinh1/Matn2/Tulp3/Nbeal2/Vit/Notch2/Tgfbr2/Frem1/Anxa2/P3h1/Sh3pxd2b/Anxa6/Ptpn6/Pls3/Csgalnact1/Ttc9/Bmp4/Fat4/Coch/Tmem119/Inppl1/Lrp5	34
BP	GO:0010976	positive regulation of neuron projection development	50|1439	329|16518	7.34318e-05	0.000859262	ENSMUSG00000030309/ENSMUSG00000022893/ENSMUSG00000031565/ENSMUSG00000030123/ENSMUSG00000034394/ENSMUSG00000002985/ENSMUSG00000001507/ENSMUSG00000070509/ENSMUSG00000006435/ENSMUSG00000029838/ENSMUSG00000044674/ENSMUSG00000001313/ENSMUSG00000021057/ENSMUSG00000026640/ENSMUSG00000021068/ENSMUSG00000045136/ENSMUSG00000023972/ENSMUSG00000021994/ENSMUSG00000019843/ENSMUSG00000055254/ENSMUSG00000068748/…	Caprin2/Adamts1/Fgfr1/Plxnd1/Lif/Apoe/Itga3/Rgma/Neurl1a/Ptn/Fzd1/Rnd2/Akap5/Plxna2/Nin/Tubb2b/Ptk7/Wnt5a/Fyn/Ntrk2/Ptprz1/Gprc5b/Lrp8/Plppr5/Plxna1/P3h1/Cd24a/Ptprd/Lyn/Ptprf/Cul7/Stmn2/Cx3cl1/Amigo1/Fn1/Plxnb2/Cobl/Itgb1/Camk2b/Dab2ip/Bmp4/Camk1/Rims1/Cux2/Ache/Fez1/Ndnf/Dbn1/Zeb2/Serpine2	50
BP	GO:0002062	chondrocyte differentiation	22|1439	104|16518	7.4046e-05	0.000859262	ENSMUSG00000031565/ENSMUSG00000019997/ENSMUSG00000016918/ENSMUSG00000020467/ENSMUSG00000022483/ENSMUSG00000006800/ENSMUSG00000000567/ENSMUSG00000070436/ENSMUSG00000022324/ENSMUSG00000008575/ENSMUSG00000024076/ENSMUSG00000032440/ENSMUSG00000032231/ENSMUSG00000032402/ENSMUSG00000055435/ENSMUSG00000051910/ENSMUSG00000018340/ENSMUSG00000021835/ENSMUSG00000020953/ENSMUSG00000032492/ENSMUSG00000037447/…	Fgfr1/Ctgf/Sulf1/Efemp1/Col2a1/Sulf2/Sox9/Serpinh1/Matn2/Nfib/Vit/Tgfbr2/Anxa2/Smad3/Maf/Sox6/Anxa6/Bmp4/Coch/Pth1r/Arid5a/Col11a1	22
BP	GO:0001562	response to protozoan	10|1439	28|16518	7.41151e-05	0.000859262	ENSMUSG00000028270/ENSMUSG00000053175/ENSMUSG00000040253/ENSMUSG00000029298/ENSMUSG00000028268/ENSMUSG00000069874/ENSMUSG00000104713/ENSMUSG00000041515/ENSMUSG00000026177/ENSMUSG00000047810	Gbp2/Bcl3/Gbp7/Gbp9/Gbp3/Irgm2/Gbp6/Irf8/Slc11a1/Ccdc88b	10
BP	GO:0001774	microglial cell activation	10|1439	28|16518	7.41151e-05	0.000859262	ENSMUSG00000022037/ENSMUSG00000052336/ENSMUSG00000024810/ENSMUSG00000022892/ENSMUSG00000024397/ENSMUSG00000025888/ENSMUSG00000027995/ENSMUSG00000039005/ENSMUSG00000015599/ENSMUSG00000031778	Clu/Cx3cr1/Il33/App/Aif1/Casp1/Tlr2/Tlr4/Ttbk1/Cx3cl1	10
BP	GO:0034110	regulation of homotypic cell-cell adhesion	10|1439	28|16518	7.41151e-05	0.000859262	ENSMUSG00000028583/ENSMUSG00000030342/ENSMUSG00000052920/ENSMUSG00000047139/ENSMUSG00000042228/ENSMUSG00000068220/ENSMUSG00000057880/ENSMUSG00000022099/ENSMUSG00000026778/ENSMUSG00000026249	Pdpn/Cd9/Prkg1/Cd24a/Lyn/Lgals1/Abat/Dmtn/Prkcq/Serpine2	10
BP	GO:0046640	regulation of alpha-beta T cell proliferation	10|1439	28|16518	7.41151e-05	0.000859262	ENSMUSG00000067212/ENSMUSG00000018899/ENSMUSG00000026395/ENSMUSG00000001123/ENSMUSG00000027223/ENSMUSG00000032440/ENSMUSG00000016496/ENSMUSG00000052142/ENSMUSG00000047139/ENSMUSG00000020101	H2-T23/Irf1/Ptprc/Lgals9/Mapk8ip1/Tgfbr2/Cd274/Rasal3/Cd24a/Vsir	10
BP	GO:0051491	positive regulation of filopodium assembly	10|1439	28|16518	7.41151e-05	0.000859262	ENSMUSG00000006435/ENSMUSG00000031517/ENSMUSG00000041936/ENSMUSG00000024143/ENSMUSG00000039735/ENSMUSG00000035863/ENSMUSG00000033342/ENSMUSG00000028943/ENSMUSG00000036006/ENSMUSG00000026778	Neurl1a/Gpm6a/Agrn/Rhoq/Fnbp1l/Palm/Plppr5/Espn/Ripor2/Prkcq	10
[truncated: 1,073 more rows]
