# Supplementary material for: Homeostatic plasticity in the retina is associated with maintenance of night vision during retinal degenerative disease
Source: eLife. 2020 Sep 22;9:e59422. doi: 10.7554/eLife.59422 (PMC7529457; doi:10.7554/eLife.59422)
Supplement: Supplementary file 15. [file elife-59422-supp15.xlsx]

## Sheet: P23HvsWT_down_KEGGenrich_signif
KEGGID	Description	GeneRatio	BgRatio	pvalue	padj	geneID	geneName	keggID	Count
mmu04744	Phototransduction	16|417	25|6462	8.17209e-14	2.22281e-11	ENSMUSG00000031789/ENSMUSG00000030324/ENSMUSG00000029491/ENSMUSG00000024575/ENSMUSG00000025386/ENSMUSG00000067220/ENSMUSG00000042282/ENSMUSG00000034837/ENSMUSG00000020890/ENSMUSG00000034452/ENSMUSG00000031450/ENSMUSG00000029064/ENSMUSG00000023979/ENSMUSG00000023982/ENSMUSG00000020907/ENSMUSG00000020599	Cngb1/Rho/Pde6b/Pde6a/Pde6g/Cnga1/Gucy2f/Gnat1/Gucy2e/Slc24a1/Grk1/Gnb1/Guca1b/Guca1a/Rcvrn/Rgs9	mmu:333329/mmu:212541/mmu:18587/mmu:225600/mmu:18588/mmu:12788/mmu:245650/mmu:14685/mmu:14919/mmu:214111/mmu:24013/mmu:14688/mmu:107477/mmu:14913/mmu:19674/mmu:19739	16
mmu03440	Homologous recombination	11|417	41|6462	3.82413e-05	0.00520082	ENSMUSG00000017146/ENSMUSG00000078773/ENSMUSG00000030726/ENSMUSG00000030528/ENSMUSG00000028933/ENSMUSG00000027323/ENSMUSG00000007646/ENSMUSG00000038644/ENSMUSG00000028884/ENSMUSG00000041147/ENSMUSG00000031928	Brca1/Rad54b/Pold3/Blm/Xrcc2/Rad51/Rad51c/Pold1/Rpa2/Brca2/Mre11a	mmu:12189/mmu:623474/mmu:67967/mmu:12144/mmu:57434/mmu:19361/mmu:114714/mmu:18971/mmu:19891/mmu:12190/mmu:17535	11
mmu03460	Fanconi anemia pathway	12|417	51|6462	7.02949e-05	0.0063734	ENSMUSG00000017146/ENSMUSG00000025384/ENSMUSG00000007570/ENSMUSG00000030528/ENSMUSG00000027323/ENSMUSG00000059772/ENSMUSG00000007646/ENSMUSG00000028884/ENSMUSG00000025646/ENSMUSG00000038425/ENSMUSG00000041147/ENSMUSG00000092118	Brca1/Faap100/Fance/Blm/Rad51/Slx1b/Rad51c/Rpa2/Atrip/Poli/Brca2/Fancf	mmu:12189/mmu:71885/mmu:72775/mmu:12144/mmu:19361/mmu:75764/mmu:114714/mmu:19891/mmu:235610/mmu:26447/mmu:12190/mmu:100040608	12
