# Supplementary material for: Homeostatic plasticity in the retina is associated with maintenance of night vision during retinal degenerative disease
Source: eLife. 2020 Sep 22;9:e59422. doi: 10.7554/eLife.59422 (PMC7529457; doi:10.7554/eLife.59422)
Supplement: Supplementary file 16. [file elife-59422-supp16.xlsx]

## Sheet: P23HvsWT_up_KEGGenrich_signific
KEGGID	Description	GeneRatio	BgRatio	pvalue	padj	geneID	geneName	keggID	Count
mmu05205	Proteoglycans in cancer	47|674	192|6462	1.17816e-08	3.40487e-06	ENSMUSG00000037225/ENSMUSG00000004040/ENSMUSG00000005087/ENSMUSG00000068699/ENSMUSG00000031565/ENSMUSG00000007655/ENSMUSG00000020044/ENSMUSG00000031328/ENSMUSG00000025351/ENSMUSG00000062960/ENSMUSG00000031207/ENSMUSG00000024998/ENSMUSG00000041075/ENSMUSG00000044674/ENSMUSG00000020122/ENSMUSG00000027087/ENSMUSG00000031714/ENSMUSG00000001761/ENSMUSG00000027995/ENSMUSG00000024778/ENSMUSG00000021994/…	Fgf2/Stat3/Cd44/Flnc/Fgfr1/Cav1/Timp3/Flna/Cd63/Kdr/Msn/Plce1/Fzd7/Fzd1/Egfr/Itgav/Gab1/Smo/Tlr2/Fas/Wnt5a/Tgfb2/Tlr4/Rock2/Prkcb/Itpr3/Thbs1/Plcg1/Ezr/Erbb2/Ptpn6/Fn1/Rras2/Itgb1/Camk2b/Prkacb/Col1a2/Itpr1/Cav2/Camk2a/Cdkn1a/Itgb5/Ctsl/Camk2g/Rras/Fzd6/Flnb	mmu:14173/mmu:20848/mmu:12505/mmu:68794/mmu:14182/mmu:12389/mmu:21859/mmu:192176/mmu:12512/mmu:16542/mmu:17698/mmu:74055/mmu:14369/mmu:14362/mmu:13649/mmu:16410/mmu:14388/mmu:319757/mmu:24088/mmu:14102/mmu:22418/mmu:21808/mmu:21898/mmu:19878/mmu:18751/mmu:16440/mmu:21825/mmu:18803/mmu:22350/mmu:13866/mmu:15170/mmu:14268/mmu:66922/mmu:16412/mmu:12323/mmu:18749/mmu:12843/mmu:16438/mmu:12390/mmu:123…	47
mmu05133	Pertussis	24|674	69|6462	4.46855e-08	6.17479e-06	ENSMUSG00000073418/ENSMUSG00000023224/ENSMUSG00000036905/ENSMUSG00000036887/ENSMUSG00000036896/ENSMUSG00000028163/ENSMUSG00000032562/ENSMUSG00000018899/ENSMUSG00000055172/ENSMUSG00000025888/ENSMUSG00000000290/ENSMUSG00000041515/ENSMUSG00000030786/ENSMUSG00000039005/ENSMUSG00000000001/ENSMUSG00000059883/ENSMUSG00000024164/ENSMUSG00000038058/ENSMUSG00000031392/ENSMUSG00000046709/ENSMUSG00000032508/…	C4b/Serping1/C1qb/C1qa/C1qc/Nfkb1/Gnai2/Irf1/C1ra/Casp1/Itgb2/Irf8/Itgam/Tlr4/Gnai3/Irak4/C3/Nod1/Irak1/Mapk10/Myd88/Gnai1/Itgb1/Tirap	mmu:12268/mmu:12258/mmu:12260/mmu:12259/mmu:12262/mmu:18033/mmu:14678/mmu:16362/mmu:50909/mmu:12362/mmu:16414/mmu:15900/mmu:16409/mmu:21898/mmu:14679/mmu:266632/mmu:12266/mmu:107607/mmu:16179/mmu:26414/mmu:17874/mmu:14677/mmu:16412/mmu:117149	24
mmu05165	Human papillomavirus infection	66|674	328|6462	6.40982e-08	6.17479e-06	ENSMUSG00000026923/ENSMUSG00000030341/ENSMUSG00000035929/ENSMUSG00000061232/ENSMUSG00000029561/ENSMUSG00000073411/ENSMUSG00000031502/ENSMUSG00000033327/ENSMUSG00000024079/ENSMUSG00000025321/ENSMUSG00000001507/ENSMUSG00000035692/ENSMUSG00000002325/ENSMUSG00000067212/ENSMUSG00000028163/ENSMUSG00000041075/ENSMUSG00000018899/ENSMUSG00000026104/ENSMUSG00000019789/ENSMUSG00000022483/ENSMUSG00000044674/…	Notch1/Tnfrsf1a/H2-Q4/H2-K1/Oasl2/H2-D1/Col4a1/Tnxb/Eif2ak2/Itgb8/Itga3/Isg15/Irf9/H2-T23/Nfkb1/Fzd7/Irf1/Stat1/Hey2/Col2a1/Fzd1/Lama5/Col4a6/Egfr/Hdac7/Itgav/Pdgfrb/Thbs2/Ccnd2/Itga4/Fas/Wnt5a/H2-M3/H2-Q6/Cdk6/Notch2/Lamb2/Lfng/Thbs1/Col4a5/Maml2/Notch3/H2-Q7/Ppp2r2c/Mx2/Fn1/Vwf/Itgb1/Prkacb/Stat2/Col1a2/Tcf7l1/Itga9/H2-T22/Ptgs2/Lama1/Creb5/Magi1/Tcf7/Tubg2/Cdkn1a/Itga6/Itgb5/Col4a2/Fzd6/Maml3	mmu:18128/mmu:21937/mmu:15015/mmu:14972/mmu:23962/mmu:14964/mmu:12826/mmu:81877/mmu:19106/mmu:320910/mmu:16400/mmu:100038882/mmu:16391/mmu:15040/mmu:18033/mmu:14369/mmu:16362/mmu:20846/mmu:15214/mmu:12824/mmu:14362/mmu:16776/mmu:94216/mmu:13649/mmu:56233/mmu:16410/mmu:18596/mmu:21826/mmu:12444/mmu:16401/mmu:14102/mmu:22418/mmu:14991/mmu:110557/mmu:12571/mmu:18129/mmu:16779/mmu:16848/mmu:21825/mmu…	66
mmu04512	ECM-receptor interaction	25|674	82|6462	4.35439e-07	3.14604e-05	ENSMUSG00000005087/ENSMUSG00000031502/ENSMUSG00000033327/ENSMUSG00000025321/ENSMUSG00000055447/ENSMUSG00000001507/ENSMUSG00000022483/ENSMUSG00000015647/ENSMUSG00000031273/ENSMUSG00000041936/ENSMUSG00000027087/ENSMUSG00000023885/ENSMUSG00000027009/ENSMUSG00000052911/ENSMUSG00000040152/ENSMUSG00000031274/ENSMUSG00000026193/ENSMUSG00000001930/ENSMUSG00000025809/ENSMUSG00000029661/ENSMUSG00000039115/…	Cd44/Col4a1/Tnxb/Itgb8/Cd47/Itga3/Col2a1/Lama5/Col4a6/Agrn/Itgav/Thbs2/Itga4/Lamb2/Thbs1/Col4a5/Fn1/Vwf/Itgb1/Col1a2/Itga9/Lama1/Itga6/Itgb5/Col4a2	mmu:12505/mmu:12826/mmu:81877/mmu:320910/mmu:16423/mmu:16400/mmu:12824/mmu:16776/mmu:94216/mmu:11603/mmu:16410/mmu:21826/mmu:16401/mmu:16779/mmu:21825/mmu:12830/mmu:14268/mmu:22371/mmu:16412/mmu:12843/mmu:104099/mmu:16772/mmu:16403/mmu:16419/mmu:12827	25
mmu05200	Pathways in cancer	85|674	497|6462	1.51646e-06	7.29963e-05	ENSMUSG00000037225/ENSMUSG00000004040/ENSMUSG00000015312/ENSMUSG00000026923/ENSMUSG00000031805/ENSMUSG00000023439/ENSMUSG00000031502/ENSMUSG00000031565/ENSMUSG00000001507/ENSMUSG00000029231/ENSMUSG00000028163/ENSMUSG00000034957/ENSMUSG00000029713/ENSMUSG00000041075/ENSMUSG00000032562/ENSMUSG00000024621/ENSMUSG00000026104/ENSMUSG00000002799/ENSMUSG00000019789/ENSMUSG00000044674/ENSMUSG00000015647/…	Fgf2/Stat3/Gadd45b/Notch1/Jak3/Gnb3/Col4a1/Fgfr1/Itga3/Pdgfra/Nfkb1/Cebpa/Gnb2/Fzd7/Gnai2/Csf1r/Stat1/Jag2/Hey2/Fzd1/Lama5/Il6st/Col4a6/Ralgds/Nfkb2/Egfr/Mgst1/Dll1/Itgav/Pdgfrb/Smo/Ccnd2/Plcb3/Fas/Wnt5a/Stat6/Pim1/Tgfb2/Plcb4/Cdk6/Notch2/Runx1/Gstm1/Gng12/Lamb2/Tgfbr2/Gnai3/Rock2/Prkcb/Ctnna2/Tpm3/Smad3/Col4a5/Plcg1/Gng7/Notch3/Erbb2/Gstt1/Mapk10/Stat5b/Fn1/Gnai1/Itgb1/Camk2b/Bmp4/Prkacb/Fgfr2/K…	mmu:14173/mmu:20848/mmu:17873/mmu:18128/mmu:16453/mmu:14695/mmu:12826/mmu:14182/mmu:16400/mmu:18595/mmu:18033/mmu:12606/mmu:14693/mmu:14369/mmu:14678/mmu:12978/mmu:20846/mmu:16450/mmu:15214/mmu:14362/mmu:16776/mmu:16195/mmu:94216/mmu:19730/mmu:18034/mmu:13649/mmu:56615/mmu:13388/mmu:16410/mmu:18596/mmu:319757/mmu:12444/mmu:18797/mmu:14102/mmu:22418/mmu:20852/mmu:18712/mmu:21808/mmu:18798/mmu:1257…	85
mmu04514	Cell adhesion molecules (CAMs)	33|674	134|6462	1.61272e-06	7.29963e-05	ENSMUSG00000035929/ENSMUSG00000061232/ENSMUSG00000037405/ENSMUSG00000073411/ENSMUSG00000027962/ENSMUSG00000025321/ENSMUSG00000022656/ENSMUSG00000067212/ENSMUSG00000038235/ENSMUSG00000027087/ENSMUSG00000026395/ENSMUSG00000000290/ENSMUSG00000027009/ENSMUSG00000030786/ENSMUSG00000017167/ENSMUSG00000016206/ENSMUSG00000073409/ENSMUSG00000040511/ENSMUSG00000016496/ENSMUSG00000005338/ENSMUSG00000026566/…	H2-Q4/H2-K1/Icam1/H2-D1/Vcam1/Itgb8/Nectin3/H2-T23/F11r/Itgav/Ptprc/Itgb2/Itga4/Itgam/Cntnap1/H2-M3/H2-Q6/Pvr/Cd274/Cadm3/Mpzl1/H2-Ab1/Ptprf/H2-Q7/Cd276/Itgb1/Cd34/Jam3/Itga9/H2-T22/Cdh3/Itga6/Cd86	mmu:15015/mmu:14972/mmu:15894/mmu:14964/mmu:22329/mmu:320910/mmu:58998/mmu:15040/mmu:16456/mmu:16410/mmu:19264/mmu:16414/mmu:16401/mmu:16409/mmu:53321/mmu:14991/mmu:110557/mmu:52118/mmu:60533/mmu:94332/mmu:68481/mmu:14961/mmu:19268/mmu:110558/mmu:102657/mmu:16412/mmu:12490/mmu:83964/mmu:104099/mmu:15039/mmu:12560/mmu:16403/mmu:12524	33
mmu04933	AGE-RAGE signaling pathway in diabetic complications	27|674	99|6462	1.76808e-06	7.29963e-05	ENSMUSG00000004040/ENSMUSG00000037405/ENSMUSG00000031502/ENSMUSG00000027962/ENSMUSG00000024998/ENSMUSG00000028163/ENSMUSG00000026104/ENSMUSG00000031273/ENSMUSG00000024960/ENSMUSG00000028128/ENSMUSG00000024014/ENSMUSG00000039239/ENSMUSG00000039943/ENSMUSG00000032440/ENSMUSG00000035385/ENSMUSG00000052889/ENSMUSG00000032402/ENSMUSG00000031274/ENSMUSG00000016933/ENSMUSG00000035352/ENSMUSG00000010660/…	Stat3/Icam1/Col4a1/Vcam1/Plce1/Nfkb1/Stat1/Col4a6/Plcb3/F3/Pim1/Tgfb2/Plcb4/Tgfbr2/Ccl2/Prkcb/Smad3/Col4a5/Plcg1/Ccl12/Plcd1/Mapk10/Stat5b/Fn1/Col1a2/Stat5a/Col4a2	mmu:20848/mmu:15894/mmu:12826/mmu:22329/mmu:74055/mmu:18033/mmu:20846/mmu:94216/mmu:18797/mmu:14066/mmu:18712/mmu:21808/mmu:18798/mmu:21813/mmu:20296/mmu:18751/mmu:17127/mmu:12830/mmu:18803/mmu:20293/mmu:18799/mmu:26414/mmu:20851/mmu:14268/mmu:12843/mmu:20850/mmu:12827	27
mmu05167	Kaposi sarcoma-associated herpesvirus infection	38|674	172|6462	4.62005e-06	0.000166899	ENSMUSG00000037225/ENSMUSG00000004040/ENSMUSG00000030341/ENSMUSG00000035929/ENSMUSG00000061232/ENSMUSG00000037405/ENSMUSG00000023439/ENSMUSG00000073411/ENSMUSG00000024079/ENSMUSG00000002325/ENSMUSG00000067212/ENSMUSG00000044786/ENSMUSG00000028163/ENSMUSG00000029713/ENSMUSG00000026104/ENSMUSG00000021756/ENSMUSG00000024778/ENSMUSG00000016206/ENSMUSG00000073409/ENSMUSG00000040274/ENSMUSG00000036402/…	Fgf2/Stat3/Tnfrsf1a/H2-Q4/H2-K1/Icam1/Gnb3/H2-D1/Eif2ak2/Irf9/H2-T23/Zfp36/Nfkb1/Gnb2/Stat1/Il6st/Fas/H2-M3/H2-Q6/Cdk6/Gng12/Itpr3/Plcg1/Gng7/C3/Lyn/H2-Q7/Mapk10/Ccr5/Stat2/H2-T22/Itpr1/Ptgs2/Cdkn1a/Pik3cg/Hck/Nfatc4/Cd86	mmu:14173/mmu:20848/mmu:21937/mmu:15015/mmu:14972/mmu:15894/mmu:14695/mmu:14964/mmu:19106/mmu:16391/mmu:15040/mmu:22695/mmu:18033/mmu:14693/mmu:20846/mmu:16195/mmu:14102/mmu:14991/mmu:110557/mmu:12571/mmu:14701/mmu:16440/mmu:18803/mmu:14708/mmu:12266/mmu:17096/mmu:110558/mmu:26414/mmu:12774/mmu:20847/mmu:15039/mmu:16438/mmu:19225/mmu:12575/mmu:30955/mmu:15162/mmu:73181/mmu:12524	38
mmu04510	Focal adhesion	41|674	193|6462	5.52976e-06	0.000177567	ENSMUSG00000068699/ENSMUSG00000031502/ENSMUSG00000033327/ENSMUSG00000007655/ENSMUSG00000031328/ENSMUSG00000025321/ENSMUSG00000001507/ENSMUSG00000062960/ENSMUSG00000029231/ENSMUSG00000026509/ENSMUSG00000022483/ENSMUSG00000015647/ENSMUSG00000031273/ENSMUSG00000058325/ENSMUSG00000020122/ENSMUSG00000027087/ENSMUSG00000024620/ENSMUSG00000023885/ENSMUSG00000000184/ENSMUSG00000027009/ENSMUSG00000019843/…	Flnc/Col4a1/Tnxb/Cav1/Flna/Itgb8/Itga3/Kdr/Pdgfra/Capn2/Col2a1/Lama5/Col4a6/Dock1/Egfr/Itgav/Pdgfrb/Thbs2/Ccnd2/Itga4/Fyn/Lamb2/Zyx/Rock2/Prkcb/Thbs1/Col4a5/Erbb2/Mapk10/Fn1/Vwf/Itgb1/Col1a2/Itga9/Lama1/Cav2/Vav1/Itga6/Itgb5/Col4a2/Flnb	mmu:68794/mmu:12826/mmu:81877/mmu:12389/mmu:192176/mmu:320910/mmu:16400/mmu:16542/mmu:18595/mmu:12334/mmu:12824/mmu:16776/mmu:94216/mmu:330662/mmu:13649/mmu:16410/mmu:18596/mmu:21826/mmu:12444/mmu:16401/mmu:14360/mmu:16779/mmu:22793/mmu:19878/mmu:18751/mmu:21825/mmu:12830/mmu:13866/mmu:26414/mmu:14268/mmu:22371/mmu:16412/mmu:12843/mmu:104099/mmu:16772/mmu:12390/mmu:22324/mmu:16403/mmu:16419/mmu:1…	41
mmu04713	Circadian entrainment	25|674	94|6462	6.97229e-06	0.00019677	ENSMUSG00000023439/ENSMUSG00000029713/ENSMUSG00000032562/ENSMUSG00000052920/ENSMUSG00000025892/ENSMUSG00000015968/ENSMUSG00000024960/ENSMUSG00000039943/ENSMUSG00000036402/ENSMUSG00000028005/ENSMUSG00000000001/ENSMUSG00000052889/ENSMUSG00000020524/ENSMUSG00000042644/ENSMUSG00000001986/ENSMUSG00000048240/ENSMUSG00000020866/ENSMUSG00000057614/ENSMUSG00000057897/ENSMUSG00000005034/ENSMUSG00000030102/…	Gnb3/Gnb2/Gnai2/Prkg1/Gria4/Cacna1d/Plcb3/Plcb4/Gng12/Gucy1b1/Gnai3/Prkcb/Gria1/Itpr3/Gria3/Gng7/Cacna1g/Gnai1/Camk2b/Prkacb/Itpr1/Camk2a/Camk2g/Gucy1a1/Nos1ap	mmu:14695/mmu:14693/mmu:14678/mmu:19091/mmu:14802/mmu:12289/mmu:18797/mmu:18798/mmu:14701/mmu:54195/mmu:14679/mmu:18751/mmu:14799/mmu:16440/mmu:53623/mmu:14708/mmu:12291/mmu:14677/mmu:12323/mmu:18749/mmu:16438/mmu:12322/mmu:12325/mmu:60596/mmu:70729	25
mmu05140	Leishmaniasis	19|674	61|6462	7.48953e-06	0.00019677	ENSMUSG00000028163/ENSMUSG00000026104/ENSMUSG00000059498/ENSMUSG00000027995/ENSMUSG00000000290/ENSMUSG00000027009/ENSMUSG00000030786/ENSMUSG00000039239/ENSMUSG00000039005/ENSMUSG00000052889/ENSMUSG00000006519/ENSMUSG00000059883/ENSMUSG00000024164/ENSMUSG00000073421/ENSMUSG00000031392/ENSMUSG00000004266/ENSMUSG00000032508/ENSMUSG00000025809/ENSMUSG00000032487	Nfkb1/Stat1/Fcgr3/Tlr2/Itgb2/Itga4/Itgam/Tgfb2/Tlr4/Prkcb/Cyba/Irak4/C3/H2-Ab1/Irak1/Ptpn6/Myd88/Itgb1/Ptgs2	mmu:18033/mmu:20846/mmu:14131/mmu:24088/mmu:16414/mmu:16401/mmu:16409/mmu:21808/mmu:21898/mmu:18751/mmu:13057/mmu:266632/mmu:12266/mmu:14961/mmu:16179/mmu:15170/mmu:17874/mmu:16412/mmu:19225	19
mmu05142	Chagas disease (American trypanosomiasis)	25|674	95|6462	8.54927e-06	0.000201563	ENSMUSG00000030341/ENSMUSG00000024697/ENSMUSG00000036905/ENSMUSG00000036887/ENSMUSG00000036896/ENSMUSG00000028163/ENSMUSG00000032562/ENSMUSG00000027995/ENSMUSG00000024960/ENSMUSG00000024778/ENSMUSG00000039239/ENSMUSG00000039005/ENSMUSG00000039943/ENSMUSG00000032440/ENSMUSG00000000001/ENSMUSG00000035385/ENSMUSG00000032402/ENSMUSG00000059883/ENSMUSG00000024164/ENSMUSG00000035352/ENSMUSG00000029120/…	Tnfrsf1a/Gna14/C1qb/C1qa/C1qc/Nfkb1/Gnai2/Tlr2/Plcb3/Fas/Tgfb2/Tlr4/Plcb4/Tgfbr2/Gnai3/Ccl2/Smad3/Irak4/C3/Ccl12/Ppp2r2c/Irak1/Mapk10/Myd88/Gnai1	mmu:21937/mmu:14675/mmu:12260/mmu:12259/mmu:12262/mmu:18033/mmu:14678/mmu:24088/mmu:18797/mmu:14102/mmu:21808/mmu:21898/mmu:18798/mmu:21813/mmu:14679/mmu:20296/mmu:17127/mmu:266632/mmu:12266/mmu:20293/mmu:269643/mmu:16179/mmu:26414/mmu:17874/mmu:14677	25
mmu05169	Epstein-Barr virus infection	40|674	190|6462	9.06686e-06	0.000201563	ENSMUSG00000004040/ENSMUSG00000015312/ENSMUSG00000031805/ENSMUSG00000035929/ENSMUSG00000005087/ENSMUSG00000061232/ENSMUSG00000037405/ENSMUSG00000060802/ENSMUSG00000073411/ENSMUSG00000026728/ENSMUSG00000024079/ENSMUSG00000040296/ENSMUSG00000035692/ENSMUSG00000002325/ENSMUSG00000067212/ENSMUSG00000028163/ENSMUSG00000034855/ENSMUSG00000026104/ENSMUSG00000025225/ENSMUSG00000027995/ENSMUSG00000000184/…	Stat3/Gadd45b/Jak3/H2-Q4/Cd44/H2-K1/Icam1/B2m/H2-D1/Vim/Eif2ak2/Ddx58/Isg15/Irf9/H2-T23/Nfkb1/Cxcl10/Stat1/Nfkb2/Tlr2/Ccnd2/Tap1/Fas/H2-M3/H2-Q6/Cdk6/Oas1a/Irak4/H2-Ab1/Oas2/Lyn/H2-Q7/Irak1/Mapk10/Myd88/Entpd1/Stat2/H2-T22/Oas1b/Cdkn1a	mmu:20848/mmu:17873/mmu:16453/mmu:15015/mmu:12505/mmu:14972/mmu:15894/mmu:12010/mmu:14964/mmu:22352/mmu:19106/mmu:230073/mmu:100038882/mmu:16391/mmu:15040/mmu:18033/mmu:15945/mmu:20846/mmu:18034/mmu:24088/mmu:12444/mmu:21354/mmu:14102/mmu:14991/mmu:110557/mmu:12571/mmu:246730/mmu:266632/mmu:14961/mmu:246728/mmu:17096/mmu:110558/mmu:16179/mmu:26414/mmu:17874/mmu:12495/mmu:20847/mmu:15039/mmu:23961…	40
mmu05162	Measles	27|674	109|6462	1.27496e-05	0.000263189	ENSMUSG00000004040/ENSMUSG00000031805/ENSMUSG00000024079/ENSMUSG00000031207/ENSMUSG00000040296/ENSMUSG00000002325/ENSMUSG00000026896/ENSMUSG00000028163/ENSMUSG00000026104/ENSMUSG00000027995/ENSMUSG00000000184/ENSMUSG00000024778/ENSMUSG00000019843/ENSMUSG00000039005/ENSMUSG00000040274/ENSMUSG00000052776/ENSMUSG00000059883/ENSMUSG00000032690/ENSMUSG00000031392/ENSMUSG00000032508/ENSMUSG00000023341/…	Stat3/Jak3/Eif2ak2/Msn/Ddx58/Irf9/Ifih1/Nfkb1/Stat1/Tlr2/Ccnd2/Fas/Fyn/Tlr4/Cdk6/Oas1a/Irak4/Oas2/Irak1/Myd88/Mx2/Stat5b/Fcgr2b/Stat2/Oas1b/Stat5a/Prkcq	mmu:20848/mmu:16453/mmu:19106/mmu:17698/mmu:230073/mmu:16391/mmu:71586/mmu:18033/mmu:20846/mmu:24088/mmu:12444/mmu:14102/mmu:14360/mmu:21898/mmu:12571/mmu:246730/mmu:266632/mmu:246728/mmu:16179/mmu:17874/mmu:17858/mmu:20851/mmu:14130/mmu:20847/mmu:23961/mmu:20850/mmu:18761	27
mmu04010	MAPK signaling pathway	53|674	285|6462	1.55461e-05	0.000299521	ENSMUSG00000037225/ENSMUSG00000015312/ENSMUSG00000030341/ENSMUSG00000068699/ENSMUSG00000031565/ENSMUSG00000014599/ENSMUSG00000031328/ENSMUSG00000062960/ENSMUSG00000026072/ENSMUSG00000029231/ENSMUSG00000028163/ENSMUSG00000024621/ENSMUSG00000015968/ENSMUSG00000024952/ENSMUSG00000025225/ENSMUSG00000020122/ENSMUSG00000010066/ENSMUSG00000024620/ENSMUSG00000028708/ENSMUSG00000026074/ENSMUSG00000024778/…	Fgf2/Gadd45b/Tnfrsf1a/Flnc/Fgfr1/Csf1/Flna/Kdr/Il1r1/Pdgfra/Nfkb1/Csf1r/Cacna1d/Rps6ka4/Nfkb2/Egfr/Cacna2d2/Pdgfrb/Mknk1/Map4k4/Fas/Cacnb3/Ntrk2/Tgfb2/Gng12/Mapk8ip1/Tgfbr2/Prkcb/Efna1/Cacna1b/Mknk2/Map3k1/Dusp6/Irak4/Rasa2/Cacna1a/Cacnb4/Epha2/Erbb2/Irak1/Mapk10/Myd88/Cacna1g/Rras2/Prkacb/Fgfr2/Kitl/Map3k8/Map3k5/Rps6ka1/Mapkapk3/Rras/Flnb	mmu:14173/mmu:17873/mmu:21937/mmu:68794/mmu:14182/mmu:12977/mmu:192176/mmu:16542/mmu:16177/mmu:18595/mmu:18033/mmu:12978/mmu:12289/mmu:56613/mmu:18034/mmu:13649/mmu:56808/mmu:18596/mmu:17346/mmu:26921/mmu:14102/mmu:12297/mmu:18212/mmu:21808/mmu:14701/mmu:19099/mmu:21813/mmu:18751/mmu:13636/mmu:12287/mmu:17347/mmu:26401/mmu:67603/mmu:266632/mmu:114713/mmu:12286/mmu:12298/mmu:13836/mmu:13866/mmu:16…	53
mmu05163	Human cytomegalovirus infection	43|674	216|6462	1.84087e-05	0.000332508	ENSMUSG00000004040/ENSMUSG00000030341/ENSMUSG00000035929/ENSMUSG00000061232/ENSMUSG00000060802/ENSMUSG00000023439/ENSMUSG00000073411/ENSMUSG00000026072/ENSMUSG00000029231/ENSMUSG00000067212/ENSMUSG00000028163/ENSMUSG00000029713/ENSMUSG00000032562/ENSMUSG00000020122/ENSMUSG00000027087/ENSMUSG00000024960/ENSMUSG00000037321/ENSMUSG00000024778/ENSMUSG00000016206/ENSMUSG00000073409/ENSMUSG00000039943/…	Stat3/Tnfrsf1a/H2-Q4/H2-K1/B2m/Gnb3/H2-D1/Il1r1/Pdgfra/H2-T23/Nfkb1/Gnb2/Gnai2/Egfr/Itgav/Plcb3/Tap1/Fas/H2-M3/H2-Q6/Plcb4/Cdk6/Gng12/Gnai3/Rock2/Ccl2/Prkcb/Itpr3/Gng7/H2-Q7/Ccl12/Cx3cl1/Gnai1/Ccr5/Prkacb/Il10rb/H2-T22/Tmem173/Itpr1/Ptgs2/Creb5/Cdkn1a/Nfatc4	mmu:20848/mmu:21937/mmu:15015/mmu:14972/mmu:12010/mmu:14695/mmu:14964/mmu:16177/mmu:18595/mmu:15040/mmu:18033/mmu:14693/mmu:14678/mmu:13649/mmu:16410/mmu:18797/mmu:21354/mmu:14102/mmu:14991/mmu:110557/mmu:18798/mmu:12571/mmu:14701/mmu:14679/mmu:19878/mmu:20296/mmu:18751/mmu:16440/mmu:14708/mmu:110558/mmu:20293/mmu:20312/mmu:14677/mmu:12774/mmu:18749/mmu:16155/mmu:15039/mmu:72512/mmu:16438/mmu:192…	43
mmu04725	Cholinergic synapse	27|674	112|6462	2.16926e-05	0.000368774	ENSMUSG00000023439/ENSMUSG00000035200/ENSMUSG00000029713/ENSMUSG00000032562/ENSMUSG00000015968/ENSMUSG00000024960/ENSMUSG00000028631/ENSMUSG00000019843/ENSMUSG00000039943/ENSMUSG00000036402/ENSMUSG00000016346/ENSMUSG00000000001/ENSMUSG00000052889/ENSMUSG00000004113/ENSMUSG00000042644/ENSMUSG00000048240/ENSMUSG00000034656/ENSMUSG00000057614/ENSMUSG00000057897/ENSMUSG00000005034/ENSMUSG00000023328/…	Gnb3/Chrnb4/Gnb2/Gnai2/Cacna1d/Plcb3/Kcnq4/Fyn/Plcb4/Gng12/Kcnq2/Gnai3/Prkcb/Cacna1b/Itpr3/Gng7/Cacna1a/Gnai1/Camk2b/Prkacb/Ache/Itpr1/Camk2a/Creb5/Pik3cg/Camk2g/Slc5a7	mmu:14695/mmu:108015/mmu:14693/mmu:14678/mmu:12289/mmu:18797/mmu:60613/mmu:14360/mmu:18798/mmu:14701/mmu:16536/mmu:14679/mmu:18751/mmu:12287/mmu:16440/mmu:14708/mmu:12286/mmu:14677/mmu:12323/mmu:18749/mmu:11423/mmu:16438/mmu:12322/mmu:231991/mmu:30955/mmu:12325/mmu:63993	27
mmu05145	Toxoplasmosis	25|674	101|6462	2.69678e-05	0.000432983	ENSMUSG00000004040/ENSMUSG00000030341/ENSMUSG00000046879/ENSMUSG00000028163/ENSMUSG00000032562/ENSMUSG00000026104/ENSMUSG00000015647/ENSMUSG00000027995/ENSMUSG00000039239/ENSMUSG00000039005/ENSMUSG00000078853/ENSMUSG00000052911/ENSMUSG00000000001/ENSMUSG00000059883/ENSMUSG00000073421/ENSMUSG00000031392/ENSMUSG00000046709/ENSMUSG00000032508/ENSMUSG00000057614/ENSMUSG00000025809/ENSMUSG00000079227/…	Stat3/Tnfrsf1a/Irgm1/Nfkb1/Gnai2/Stat1/Lama5/Tlr2/Tgfb2/Tlr4/Igtp/Lamb2/Gnai3/Irak4/H2-Ab1/Irak1/Mapk10/Myd88/Gnai1/Itgb1/Ccr5/Il10rb/Lama1/Itga6/Pik3cg	mmu:20848/mmu:21937/mmu:15944/mmu:18033/mmu:14678/mmu:20846/mmu:16776/mmu:24088/mmu:21808/mmu:21898/mmu:16145/mmu:16779/mmu:14679/mmu:266632/mmu:14961/mmu:16179/mmu:26414/mmu:17874/mmu:14677/mmu:16412/mmu:12774/mmu:16155/mmu:16772/mmu:16403/mmu:30955	25
mmu04728	Dopaminergic synapse	29|674	128|6462	3.8016e-05	0.000564141	ENSMUSG00000061718/ENSMUSG00000023439/ENSMUSG00000029713/ENSMUSG00000032562/ENSMUSG00000025892/ENSMUSG00000015968/ENSMUSG00000024960/ENSMUSG00000039943/ENSMUSG00000036402/ENSMUSG00000000001/ENSMUSG00000052889/ENSMUSG00000020524/ENSMUSG00000004113/ENSMUSG00000042644/ENSMUSG00000001986/ENSMUSG00000048240/ENSMUSG00000074657/ENSMUSG00000034656/ENSMUSG00000029120/ENSMUSG00000046709/ENSMUSG00000057614/…	Ppp1r1b/Gnb3/Gnb2/Gnai2/Gria4/Cacna1d/Plcb3/Plcb4/Gng12/Gnai3/Prkcb/Gria1/Cacna1b/Itpr3/Gria3/Gng7/Kif5a/Cacna1a/Ppp2r2c/Mapk10/Gnai1/Camk2b/Comt/Prkacb/Scn1a/Itpr1/Camk2a/Creb5/Camk2g	mmu:19049/mmu:14695/mmu:14693/mmu:14678/mmu:14802/mmu:12289/mmu:18797/mmu:18798/mmu:14701/mmu:14679/mmu:18751/mmu:14799/mmu:12287/mmu:16440/mmu:53623/mmu:14708/mmu:16572/mmu:12286/mmu:269643/mmu:26414/mmu:14677/mmu:12323/mmu:12846/mmu:18749/mmu:20265/mmu:16438/mmu:12322/mmu:231991/mmu:12325	29
mmu05146	Amoebiasis	22|674	85|6462	3.90409e-05	0.000564141	ENSMUSG00000024697/ENSMUSG00000031502/ENSMUSG00000026072/ENSMUSG00000028163/ENSMUSG00000015647/ENSMUSG00000031273/ENSMUSG00000027995/ENSMUSG00000000290/ENSMUSG00000024960/ENSMUSG00000030786/ENSMUSG00000039239/ENSMUSG00000039005/ENSMUSG00000039943/ENSMUSG00000052911/ENSMUSG00000052688/ENSMUSG00000052889/ENSMUSG00000031274/ENSMUSG00000026193/ENSMUSG00000005034/ENSMUSG00000029661/ENSMUSG00000032796/…	Gna14/Col4a1/Il1r1/Nfkb1/Lama5/Col4a6/Tlr2/Itgb2/Plcb3/Itgam/Tgfb2/Tlr4/Plcb4/Lamb2/Rab7b/Prkcb/Col4a5/Fn1/Prkacb/Col1a2/Lama1/Col4a2	mmu:14675/mmu:12826/mmu:16177/mmu:18033/mmu:16776/mmu:94216/mmu:24088/mmu:16414/mmu:18797/mmu:16409/mmu:21808/mmu:21898/mmu:18798/mmu:16779/mmu:226421/mmu:18751/mmu:12830/mmu:14268/mmu:18749/mmu:12843/mmu:16772/mmu:12827	22
mmu04151	PI3K-Akt signaling pathway	57|674	325|6462	4.39502e-05	0.000604839	ENSMUSG00000037225/ENSMUSG00000022146/ENSMUSG00000031805/ENSMUSG00000023439/ENSMUSG00000031502/ENSMUSG00000031565/ENSMUSG00000033327/ENSMUSG00000014599/ENSMUSG00000025321/ENSMUSG00000001507/ENSMUSG00000062960/ENSMUSG00000029231/ENSMUSG00000028163/ENSMUSG00000019982/ENSMUSG00000029713/ENSMUSG00000024621/ENSMUSG00000022483/ENSMUSG00000015647/ENSMUSG00000031273/ENSMUSG00000055737/ENSMUSG00000020122/…	Fgf2/Osmr/Jak3/Gnb3/Col4a1/Fgfr1/Tnxb/Csf1/Itgb8/Itga3/Kdr/Pdgfra/Nfkb1/Myb/Gnb2/Csf1r/Col2a1/Lama5/Col4a6/Ghr/Egfr/Irs1/Itgav/Pdgfrb/Thbs2/Tlr2/Ccnd2/Itga4/Ntrk2/Tlr4/Cdk6/Gng12/Lamb2/Efna1/Thbs1/Col4a5/Gng7/Pik3ap1/Epha2/Erbb2/Ppp2r2c/Sgk3/Fn1/Vwf/Itgb1/Fgfr2/Kitl/Col1a2/Itga9/Lama1/Creb5/Magi1/Cdkn1a/Itga6/Itgb5/Pik3cg/Col4a2	mmu:14173/mmu:18414/mmu:16453/mmu:14695/mmu:12826/mmu:14182/mmu:81877/mmu:12977/mmu:320910/mmu:16400/mmu:16542/mmu:18595/mmu:18033/mmu:17863/mmu:14693/mmu:12978/mmu:12824/mmu:16776/mmu:94216/mmu:14600/mmu:13649/mmu:16367/mmu:16410/mmu:18596/mmu:21826/mmu:24088/mmu:12444/mmu:16401/mmu:18212/mmu:21898/mmu:12571/mmu:14701/mmu:16779/mmu:13636/mmu:21825/mmu:12830/mmu:14708/mmu:83490/mmu:13836/mmu:1386…	57
mmu04668	TNF signaling pathway	25|674	105|6462	5.43448e-05	0.000713893	ENSMUSG00000053175/ENSMUSG00000053113/ENSMUSG00000030341/ENSMUSG00000037405/ENSMUSG00000052837/ENSMUSG00000027962/ENSMUSG00000014599/ENSMUSG00000028599/ENSMUSG00000034394/ENSMUSG00000000957/ENSMUSG00000028163/ENSMUSG00000034855/ENSMUSG00000018899/ENSMUSG00000024952/ENSMUSG00000024778/ENSMUSG00000035385/ENSMUSG00000056501/ENSMUSG00000035352/ENSMUSG00000046709/ENSMUSG00000031778/ENSMUSG00000026883/…	Bcl3/Socs3/Tnfrsf1a/Icam1/Junb/Vcam1/Csf1/Tnfrsf1b/Lif/Mmp14/Nfkb1/Cxcl10/Irf1/Rps6ka4/Fas/Ccl2/Cebpb/Ccl12/Mapk10/Cx3cl1/Dab2ip/Map3k8/Map3k5/Ptgs2/Creb5	mmu:12051/mmu:12702/mmu:21937/mmu:15894/mmu:16477/mmu:22329/mmu:12977/mmu:21938/mmu:16878/mmu:17387/mmu:18033/mmu:15945/mmu:16362/mmu:56613/mmu:14102/mmu:20296/mmu:12608/mmu:20293/mmu:26414/mmu:20312/mmu:69601/mmu:26410/mmu:26408/mmu:19225/mmu:231991	25
mmu05206	MicroRNAs in cancer	30|674	138|6462	6.41059e-05	0.000781138	ENSMUSG00000004040/ENSMUSG00000026923/ENSMUSG00000005087/ENSMUSG00000026728/ENSMUSG00000024087/ENSMUSG00000033327/ENSMUSG00000020044/ENSMUSG00000029231/ENSMUSG00000028163/ENSMUSG00000020122/ENSMUSG00000055980/ENSMUSG00000024620/ENSMUSG00000000184/ENSMUSG00000024014/ENSMUSG00000039239/ENSMUSG00000040274/ENSMUSG00000027878/ENSMUSG00000052889/ENSMUSG00000040152/ENSMUSG00000027478/ENSMUSG00000016933/…	Stat3/Notch1/Cd44/Vim/Cyp1b1/Tnxb/Timp3/Pdgfra/Nfkb1/Egfr/Irs1/Pdgfrb/Ccnd2/Pim1/Tgfb2/Cdk6/Notch2/Prkcb/Thbs1/Dnmt3b/Plcg1/Ezr/Notch3/Erbb2/St14/Ptgs2/Cdkn1a/Zeb2/Hmox1/Abcb1b	mmu:20848/mmu:18128/mmu:12505/mmu:22352/mmu:13078/mmu:81877/mmu:21859/mmu:18595/mmu:18033/mmu:13649/mmu:16367/mmu:18596/mmu:12444/mmu:18712/mmu:21808/mmu:12571/mmu:18129/mmu:18751/mmu:21825/mmu:13436/mmu:18803/mmu:22350/mmu:18131/mmu:13866/mmu:19143/mmu:19225/mmu:12575/mmu:24136/mmu:15368/mmu:18669	30
mmu05170	Human immunodeficiency virus 1 infection	39|674	199|6462	6.48696e-05	0.000781138	ENSMUSG00000030341/ENSMUSG00000035929/ENSMUSG00000061232/ENSMUSG00000060802/ENSMUSG00000023439/ENSMUSG00000073411/ENSMUSG00000057596/ENSMUSG00000028599/ENSMUSG00000057143/ENSMUSG00000067212/ENSMUSG00000028163/ENSMUSG00000029713/ENSMUSG00000032562/ENSMUSG00000046718/ENSMUSG00000027995/ENSMUSG00000037321/ENSMUSG00000031367/ENSMUSG00000024778/ENSMUSG00000016206/ENSMUSG00000073409/ENSMUSG00000039005/…	Tnfrsf1a/H2-Q4/H2-K1/B2m/Gnb3/H2-D1/Trim30d/Tnfrsf1b/Trim12c/H2-T23/Nfkb1/Gnb2/Gnai2/Bst2/Tlr2/Tap1/Ap1s2/Fas/H2-M3/H2-Q6/Tlr4/Gng12/Gnai3/Prkcb/Itpr3/Plcg1/Gng7/Irak4/H2-Q7/Irak1/Mapk10/Myd88/Gnai1/Ccr5/H2-T22/Tmem173/Itpr1/Apobec3/Nfatc4	mmu:21937/mmu:15015/mmu:14972/mmu:12010/mmu:14695/mmu:14964/mmu:209387/mmu:21938/mmu:319236/mmu:15040/mmu:18033/mmu:14693/mmu:14678/mmu:69550/mmu:24088/mmu:21354/mmu:108012/mmu:14102/mmu:14991/mmu:110557/mmu:21898/mmu:14701/mmu:14679/mmu:18751/mmu:16440/mmu:18803/mmu:14708/mmu:266632/mmu:110558/mmu:16179/mmu:26414/mmu:17874/mmu:14677/mmu:12774/mmu:15039/mmu:72512/mmu:16438/mmu:80287/mmu:73181	39
mmu05150	Staphylococcus aureus infection	14|674	44|6462	9.18789e-05	0.00106212	ENSMUSG00000073418/ENSMUSG00000037405/ENSMUSG00000036905/ENSMUSG00000058952/ENSMUSG00000036887/ENSMUSG00000026365/ENSMUSG00000036896/ENSMUSG00000059498/ENSMUSG00000055172/ENSMUSG00000000290/ENSMUSG00000030786/ENSMUSG00000024164/ENSMUSG00000073421/ENSMUSG00000026656	C4b/Icam1/C1qb/Cfi/C1qa/Cfh/C1qc/Fcgr3/C1ra/Itgb2/Itgam/C3/H2-Ab1/Fcgr2b	mmu:12268/mmu:15894/mmu:12260/mmu:12630/mmu:12259/mmu:12628/mmu:12262/mmu:14131/mmu:50909/mmu:16414/mmu:16409/mmu:12266/mmu:14961/mmu:14130	14
mmu04630	JAK-STAT signaling pathway	28|674	130|6462	0.000132406	0.00147174	ENSMUSG00000004040/ENSMUSG00000020932/ENSMUSG00000022146/ENSMUSG00000053113/ENSMUSG00000031805/ENSMUSG00000034394/ENSMUSG00000063558/ENSMUSG00000029231/ENSMUSG00000002325/ENSMUSG00000026104/ENSMUSG00000021756/ENSMUSG00000055737/ENSMUSG00000020122/ENSMUSG00000024620/ENSMUSG00000000184/ENSMUSG00000027718/ENSMUSG00000002147/ENSMUSG00000024014/ENSMUSG00000023092/ENSMUSG00000004266/ENSMUSG00000020919/…	Stat3/Gfap/Osmr/Socs3/Jak3/Lif/Aox1/Pdgfra/Irf9/Stat1/Il6st/Ghr/Egfr/Pdgfrb/Ccnd2/Il21/Stat6/Pim1/Fhl1/Ptpn6/Stat5b/Socs2/Stat2/Il10rb/Il13ra1/Cdkn1a/Stat5a/Ifnlr1	mmu:20848/mmu:14580/mmu:18414/mmu:12702/mmu:16453/mmu:16878/mmu:11761/mmu:18595/mmu:16391/mmu:20846/mmu:16195/mmu:14600/mmu:13649/mmu:18596/mmu:12444/mmu:60505/mmu:20852/mmu:18712/mmu:14199/mmu:15170/mmu:20851/mmu:216233/mmu:20847/mmu:16155/mmu:16164/mmu:12575/mmu:20850/mmu:242700	28
mmu04392	Hippo signaling pathway - multiple species	10|674	26|6462	0.000159848	0.00171097	ENSMUSG00000027803/ENSMUSG00000042129/ENSMUSG00000018849/ENSMUSG00000030796/ENSMUSG00000053110/ENSMUSG00000022178/ENSMUSG00000025239/ENSMUSG00000046743/ENSMUSG00000027339/ENSMUSG00000022433	Wwtr1/Rassf4/Wwc1/Tead2/Yap1/Ajuba/Limd1/Fat4/Rassf2/Csnk1e	mmu:97064/mmu:213391/mmu:211652/mmu:21677/mmu:22601/mmu:16475/mmu:29806/mmu:329628/mmu:215653/mmu:27373	10
mmu05144	Malaria	13|674	41|6462	0.00016993	0.00171784	ENSMUSG00000037405/ENSMUSG00000027962/ENSMUSG00000037872/ENSMUSG00000023885/ENSMUSG00000027995/ENSMUSG00000000290/ENSMUSG00000039239/ENSMUSG00000039005/ENSMUSG00000035385/ENSMUSG00000040152/ENSMUSG00000035352/ENSMUSG00000040249/ENSMUSG00000032508	Icam1/Vcam1/Ackr1/Thbs2/Tlr2/Itgb2/Tgfb2/Tlr4/Ccl2/Thbs1/Ccl12/Lrp1/Myd88	mmu:15894/mmu:22329/mmu:13349/mmu:21826/mmu:24088/mmu:16414/mmu:21808/mmu:21898/mmu:20296/mmu:21825/mmu:20293/mmu:16971/mmu:17874	13
mmu04064	NF-kappa B signaling pathway	21|674	87|6462	0.000172378	0.00171784	ENSMUSG00000015312/ENSMUSG00000030341/ENSMUSG00000037405/ENSMUSG00000027962/ENSMUSG00000026072/ENSMUSG00000040296/ENSMUSG00000028163/ENSMUSG00000030339/ENSMUSG00000025225/ENSMUSG00000033170/ENSMUSG00000039005/ENSMUSG00000052889/ENSMUSG00000016933/ENSMUSG00000059883/ENSMUSG00000042228/ENSMUSG00000031392/ENSMUSG00000032508/ENSMUSG00000032487/ENSMUSG00000030172/ENSMUSG00000032041/ENSMUSG00000026778	Gadd45b/Tnfrsf1a/Icam1/Vcam1/Il1r1/Ddx58/Nfkb1/Ltbr/Nfkb2/Card10/Tlr4/Prkcb/Plcg1/Irak4/Lyn/Irak1/Myd88/Ptgs2/Erc1/Tirap/Prkcq	mmu:17873/mmu:21937/mmu:15894/mmu:22329/mmu:16177/mmu:230073/mmu:18033/mmu:17000/mmu:18034/mmu:105844/mmu:21898/mmu:18751/mmu:18803/mmu:266632/mmu:17096/mmu:16179/mmu:17874/mmu:19225/mmu:111173/mmu:117149/mmu:18761	21
mmu04724	Glutamatergic synapse	25|674	113|6462	0.000192504	0.00185445	ENSMUSG00000023439/ENSMUSG00000024935/ENSMUSG00000029713/ENSMUSG00000032562/ENSMUSG00000001985/ENSMUSG00000025892/ENSMUSG00000015968/ENSMUSG00000022462/ENSMUSG00000056073/ENSMUSG00000024960/ENSMUSG00000039943/ENSMUSG00000036402/ENSMUSG00000000001/ENSMUSG00000005360/ENSMUSG00000052889/ENSMUSG00000020524/ENSMUSG00000042644/ENSMUSG00000001986/ENSMUSG00000048240/ENSMUSG00000022935/ENSMUSG00000034656/…	Gnb3/Slc1a1/Gnb2/Gnai2/Grik3/Gria4/Cacna1d/Slc38a2/Grik2/Plcb3/Plcb4/Gng12/Gnai3/Slc1a3/Prkcb/Gria1/Itpr3/Gria3/Gng7/Grik1/Cacna1a/Grk3/Gnai1/Prkacb/Itpr1	mmu:14695/mmu:20510/mmu:14693/mmu:14678/mmu:14807/mmu:14802/mmu:12289/mmu:67760/mmu:14806/mmu:18797/mmu:18798/mmu:14701/mmu:14679/mmu:20512/mmu:18751/mmu:14799/mmu:16440/mmu:53623/mmu:14708/mmu:14805/mmu:12286/mmu:320129/mmu:14677/mmu:18749/mmu:16438	25
mmu04726	Serotonergic synapse	26|674	120|6462	0.000206282	0.00192308	ENSMUSG00000023439/ENSMUSG00000006764/ENSMUSG00000029713/ENSMUSG00000032562/ENSMUSG00000022892/ENSMUSG00000015968/ENSMUSG00000022469/ENSMUSG00000024960/ENSMUSG00000039943/ENSMUSG00000052914/ENSMUSG00000036402/ENSMUSG00000000001/ENSMUSG00000052889/ENSMUSG00000004113/ENSMUSG00000042644/ENSMUSG00000048240/ENSMUSG00000047250/ENSMUSG00000034656/ENSMUSG00000032269/ENSMUSG00000015224/ENSMUSG00000057614/…	Gnb3/Tph2/Gnb2/Gnai2/App/Cacna1d/Rapgef3/Plcb3/Plcb4/Cyp2j6/Gng12/Gnai3/Prkcb/Cacna1b/Itpr3/Gng7/Ptgs1/Cacna1a/Htr3a/Cyp2j9/Gnai1/Prkacb/Cyp4x1/Itpr1/Ptgs2/Gabrb3	mmu:14695/mmu:216343/mmu:14693/mmu:14678/mmu:11820/mmu:12289/mmu:223864/mmu:18797/mmu:18798/mmu:13110/mmu:14701/mmu:14679/mmu:18751/mmu:12287/mmu:16440/mmu:14708/mmu:19224/mmu:12286/mmu:15561/mmu:74519/mmu:14677/mmu:18749/mmu:81906/mmu:16438/mmu:19225/mmu:14402	26
mmu04621	NOD-like receptor signaling pathway	30|674	148|6462	0.000242511	0.00219018	ENSMUSG00000029338/ENSMUSG00000028270/ENSMUSG00000040253/ENSMUSG00000028268/ENSMUSG00000002325/ENSMUSG00000028163/ENSMUSG00000026104/ENSMUSG00000105504/ENSMUSG00000025888/ENSMUSG00000024960/ENSMUSG00000039005/ENSMUSG00000039943/ENSMUSG00000023348/ENSMUSG00000029468/ENSMUSG00000035385/ENSMUSG00000052776/ENSMUSG00000042644/ENSMUSG00000006519/ENSMUSG00000059883/ENSMUSG00000032690/ENSMUSG00000035352/…	Antxr2/Gbp2/Gbp7/Gbp3/Irf9/Nfkb1/Stat1/Gbp5/Casp1/Plcb3/Tlr4/Plcb4/Trip6/P2rx7/Ccl2/Oas1a/Itpr3/Cyba/Irak4/Oas2/Ccl12/Nod1/Mapk10/Myd88/Stat2/Tmem173/Itpr1/Oas1b/Antxr1/Casp12	mmu:71914/mmu:14469/mmu:229900/mmu:55932/mmu:16391/mmu:18033/mmu:20846/mmu:229898/mmu:12362/mmu:18797/mmu:21898/mmu:18798/mmu:22051/mmu:18439/mmu:20296/mmu:246730/mmu:16440/mmu:13057/mmu:266632/mmu:246728/mmu:20293/mmu:107607/mmu:26414/mmu:17874/mmu:20847/mmu:72512/mmu:16438/mmu:23961/mmu:69538/mmu:12364	30
mmu05412	Arrhythmogenic right ventricular cardiomyopathy (ARVC)	18|674	71|6462	0.000258053	0.00225992	ENSMUSG00000025321/ENSMUSG00000001507/ENSMUSG00000029156/ENSMUSG00000015968/ENSMUSG00000010066/ENSMUSG00000027087/ENSMUSG00000027009/ENSMUSG00000003352/ENSMUSG00000028063/ENSMUSG00000063063/ENSMUSG00000017412/ENSMUSG00000025809/ENSMUSG00000055799/ENSMUSG00000039115/ENSMUSG00000000782/ENSMUSG00000001552/ENSMUSG00000027111/ENSMUSG00000022817	Itgb8/Itga3/Sgcb/Cacna1d/Cacna2d2/Itgav/Itga4/Cacnb3/Lmna/Ctnna2/Cacnb4/Itgb1/Tcf7l1/Itga9/Tcf7/Jup/Itga6/Itgb5	mmu:320910/mmu:16400/mmu:24051/mmu:12289/mmu:56808/mmu:16410/mmu:16401/mmu:12297/mmu:16905/mmu:12386/mmu:12298/mmu:16412/mmu:21415/mmu:104099/mmu:21414/mmu:16480/mmu:16403/mmu:16419	18
mmu04145	Phagosome	29|674	143|6462	0.000303954	0.00258361	ENSMUSG00000035929/ENSMUSG00000061232/ENSMUSG00000038642/ENSMUSG00000073411/ENSMUSG00000067212/ENSMUSG00000059498/ENSMUSG00000055172/ENSMUSG00000045136/ENSMUSG00000027087/ENSMUSG00000023885/ENSMUSG00000027995/ENSMUSG00000000290/ENSMUSG00000037321/ENSMUSG00000030786/ENSMUSG00000016206/ENSMUSG00000073409/ENSMUSG00000039005/ENSMUSG00000052688/ENSMUSG00000040152/ENSMUSG00000006519/ENSMUSG00000024164/…	H2-Q4/H2-K1/Ctss/H2-D1/H2-T23/Fcgr3/C1ra/Tubb2b/Itgav/Thbs2/Tlr2/Itgb2/Tap1/Itgam/H2-M3/H2-Q6/Tlr4/Rab7b/Thbs1/Cyba/C3/H2-Ab1/H2-Q7/Fcgr2b/Itgb1/H2-T22/Lamp2/Itgb5/Ctsl	mmu:15015/mmu:14972/mmu:13040/mmu:14964/mmu:15040/mmu:14131/mmu:50909/mmu:73710/mmu:16410/mmu:21826/mmu:24088/mmu:16414/mmu:21354/mmu:16409/mmu:14991/mmu:110557/mmu:21898/mmu:226421/mmu:21825/mmu:13057/mmu:12266/mmu:14961/mmu:110558/mmu:14130/mmu:16412/mmu:15039/mmu:16784/mmu:16419/mmu:13039	29
mmu04062	Chemokine signaling pathway	32|674	166|6462	0.000395878	0.00326882	ENSMUSG00000004040/ENSMUSG00000031805/ENSMUSG00000023439/ENSMUSG00000052336/ENSMUSG00000028163/ENSMUSG00000029713/ENSMUSG00000032562/ENSMUSG00000034855/ENSMUSG00000026104/ENSMUSG00000024960/ENSMUSG00000039943/ENSMUSG00000036402/ENSMUSG00000000001/ENSMUSG00000020580/ENSMUSG00000035385/ENSMUSG00000052889/ENSMUSG00000048240/ENSMUSG00000042249/ENSMUSG00000042228/ENSMUSG00000035352/ENSMUSG00000031778/…	Stat3/Jak3/Gnb3/Cx3cr1/Nfkb1/Gnb2/Gnai2/Cxcl10/Stat1/Plcb3/Plcb4/Gng12/Gnai3/Rock2/Ccl2/Prkcb/Gng7/Grk3/Lyn/Ccl12/Cx3cl1/Stat5b/Gnai1/Ccr5/Ccl28/Dock2/Prkacb/Stat2/Ccl9/Vav1/Pik3cg/Hck	mmu:20848/mmu:16453/mmu:14695/mmu:13051/mmu:18033/mmu:14693/mmu:14678/mmu:15945/mmu:20846/mmu:18797/mmu:18798/mmu:14701/mmu:14679/mmu:19878/mmu:20296/mmu:18751/mmu:14708/mmu:320129/mmu:17096/mmu:20293/mmu:20312/mmu:20851/mmu:14677/mmu:12774/mmu:56838/mmu:94176/mmu:18749/mmu:20847/mmu:20308/mmu:22324/mmu:30955/mmu:15162	32
mmu04360	Axon guidance	33|674	174|6462	0.000439457	0.00352787	ENSMUSG00000056427/ENSMUSG00000032562/ENSMUSG00000026640/ENSMUSG00000034616/ENSMUSG00000001761/ENSMUSG00000057969/ENSMUSG00000063531/ENSMUSG00000021994/ENSMUSG00000019843/ENSMUSG00000000001/ENSMUSG00000020580/ENSMUSG00000027954/ENSMUSG00000030084/ENSMUSG00000016933/ENSMUSG00000006445/ENSMUSG00000019647/ENSMUSG00000032735/ENSMUSG00000031217/ENSMUSG00000036606/ENSMUSG00000057614/ENSMUSG00000025809/…	Slit3/Gnai2/Plxna2/Ssh3/Smo/Sema3b/Sema3e/Wnt5a/Fyn/Gnai3/Rock2/Efna1/Plxna1/Plcg1/Epha2/Sema6a/Ablim3/Efnb1/Plxnb2/Gnai1/Itgb1/Camk2b/Boc/Sema5a/Sema4g/Ablim2/Camk2a/Efnb2/Slit2/Camk2g/Rras/Nfatc4/Unc5d	mmu:20564/mmu:14678/mmu:18845/mmu:245857/mmu:319757/mmu:20347/mmu:20349/mmu:22418/mmu:14360/mmu:14679/mmu:19878/mmu:13636/mmu:18844/mmu:18803/mmu:13836/mmu:20358/mmu:319713/mmu:13641/mmu:140570/mmu:14677/mmu:16412/mmu:12323/mmu:117606/mmu:20356/mmu:26456/mmu:231148/mmu:12322/mmu:13642/mmu:20563/mmu:12325/mmu:20130/mmu:73181/mmu:210801	33
mmu04940	Type I diabetes mellitus	13|674	46|6462	0.000600066	0.004687	ENSMUSG00000035929/ENSMUSG00000061232/ENSMUSG00000073411/ENSMUSG00000026204/ENSMUSG00000067212/ENSMUSG00000024778/ENSMUSG00000016206/ENSMUSG00000073409/ENSMUSG00000073421/ENSMUSG00000060550/ENSMUSG00000056553/ENSMUSG00000056116/ENSMUSG00000022901	H2-Q4/H2-K1/H2-D1/Ptprn/H2-T23/Fas/H2-M3/H2-Q6/H2-Ab1/H2-Q7/Ptprn2/H2-T22/Cd86	mmu:15015/mmu:14972/mmu:14964/mmu:19275/mmu:15040/mmu:14102/mmu:14991/mmu:110557/mmu:14961/mmu:110558/mmu:19276/mmu:15039/mmu:12524	13
mmu05032	Morphine addiction	20|674	89|6462	0.000666256	0.00506706	ENSMUSG00000023439/ENSMUSG00000030671/ENSMUSG00000029713/ENSMUSG00000032562/ENSMUSG00000074991/ENSMUSG00000036402/ENSMUSG00000000001/ENSMUSG00000052889/ENSMUSG00000004113/ENSMUSG00000048240/ENSMUSG00000034656/ENSMUSG00000042249/ENSMUSG00000057614/ENSMUSG00000042429/ENSMUSG00000005034/ENSMUSG00000004347/ENSMUSG00000010803/ENSMUSG00000020436/ENSMUSG00000033676/ENSMUSG00000028525	Gnb3/Pde3b/Gnb2/Gnai2/Gabrr3/Gng12/Gnai3/Prkcb/Cacna1b/Gng7/Cacna1a/Grk3/Gnai1/Adora1/Prkacb/Pde1c/Gabra1/Gabrg2/Gabrb3/Pde4b	mmu:14695/mmu:18576/mmu:14693/mmu:14678/mmu:328699/mmu:14701/mmu:14679/mmu:18751/mmu:12287/mmu:14708/mmu:12286/mmu:320129/mmu:14677/mmu:11539/mmu:18749/mmu:18575/mmu:14394/mmu:14406/mmu:14402/mmu:18578	20
mmu04723	Retrograde endocannabinoid signaling	28|674	145|6462	0.000872834	0.00646792	ENSMUSG00000023439/ENSMUSG00000029713/ENSMUSG00000032562/ENSMUSG00000074991/ENSMUSG00000025892/ENSMUSG00000015968/ENSMUSG00000024960/ENSMUSG00000033174/ENSMUSG00000039943/ENSMUSG00000036402/ENSMUSG00000000001/ENSMUSG00000052889/ENSMUSG00000020524/ENSMUSG00000004113/ENSMUSG00000042644/ENSMUSG00000001986/ENSMUSG00000048240/ENSMUSG00000064341/ENSMUSG00000034656/ENSMUSG00000046709/ENSMUSG00000057614/…	Gnb3/Gnb2/Gnai2/Gabrr3/Gria4/Cacna1d/Plcb3/Mgll/Plcb4/Gng12/Gnai3/Prkcb/Gria1/Cacna1b/Itpr3/Gria3/Gng7/mt-Nd1/Cacna1a/Mapk10/Gnai1/Prkacb/Rims1/Gabra1/Gabrg2/Itpr1/Ptgs2/Gabrb3	mmu:14695/mmu:14693/mmu:14678/mmu:328699/mmu:14802/mmu:12289/mmu:18797/mmu:23945/mmu:18798/mmu:14701/mmu:14679/mmu:18751/mmu:14799/mmu:12287/mmu:16440/mmu:53623/mmu:14708/mmu:17716/mmu:12286/mmu:26414/mmu:14677/mmu:18749/mmu:116837/mmu:14394/mmu:14406/mmu:16438/mmu:19225/mmu:14402	28
mmu05168	Herpes simplex infection	32|674	174|6462	0.000927085	0.00662712	ENSMUSG00000053113/ENSMUSG00000030341/ENSMUSG00000035929/ENSMUSG00000061232/ENSMUSG00000034459/ENSMUSG00000073411/ENSMUSG00000024079/ENSMUSG00000040296/ENSMUSG00000002325/ENSMUSG00000026896/ENSMUSG00000067212/ENSMUSG00000028163/ENSMUSG00000026104/ENSMUSG00000027995/ENSMUSG00000037321/ENSMUSG00000024778/ENSMUSG00000016206/ENSMUSG00000073409/ENSMUSG00000035385/ENSMUSG00000052776/ENSMUSG00000024164/…	Socs3/Tnfrsf1a/H2-Q4/H2-K1/Ifit1/H2-D1/Eif2ak2/Ddx58/Irf9/Ifih1/H2-T23/Nfkb1/Stat1/Tlr2/Tap1/Fas/H2-M3/H2-Q6/Ccl2/Oas1a/C3/H2-Ab1/Oas2/H2-Q7/Ccl12/Mapk10/Myd88/Taf9b/Stat2/H2-T22/Oas1b/Sp100	mmu:12702/mmu:21937/mmu:15015/mmu:14972/mmu:15957/mmu:14964/mmu:19106/mmu:230073/mmu:16391/mmu:71586/mmu:15040/mmu:18033/mmu:20846/mmu:24088/mmu:21354/mmu:14102/mmu:14991/mmu:110557/mmu:20296/mmu:246730/mmu:12266/mmu:14961/mmu:246728/mmu:110558/mmu:20293/mmu:26414/mmu:17874/mmu:407786/mmu:20847/mmu:15039/mmu:23961/mmu:20684	32
mmu04727	GABAergic synapse	19|674	85|6462	0.000965061	0.00662712	ENSMUSG00000023439/ENSMUSG00000029713/ENSMUSG00000032562/ENSMUSG00000074991/ENSMUSG00000015968/ENSMUSG00000022462/ENSMUSG00000036402/ENSMUSG00000000001/ENSMUSG00000052889/ENSMUSG00000004113/ENSMUSG00000048240/ENSMUSG00000034656/ENSMUSG00000057880/ENSMUSG00000057614/ENSMUSG00000005034/ENSMUSG00000010803/ENSMUSG00000020436/ENSMUSG00000030310/ENSMUSG00000033676	Gnb3/Gnb2/Gnai2/Gabrr3/Cacna1d/Slc38a2/Gng12/Gnai3/Prkcb/Cacna1b/Gng7/Cacna1a/Abat/Gnai1/Prkacb/Gabra1/Gabrg2/Slc6a1/Gabrb3	mmu:14695/mmu:14693/mmu:14678/mmu:328699/mmu:12289/mmu:67760/mmu:14701/mmu:14679/mmu:18751/mmu:12287/mmu:14708/mmu:12286/mmu:268860/mmu:14677/mmu:18749/mmu:14394/mmu:14406/mmu:232333/mmu:14402	19
mmu04730	Long-term depression	15|674	60|6462	0.000969386	0.00662712	ENSMUSG00000032562/ENSMUSG00000052920/ENSMUSG00000024960/ENSMUSG00000039943/ENSMUSG00000028005/ENSMUSG00000000001/ENSMUSG00000052889/ENSMUSG00000020524/ENSMUSG00000042644/ENSMUSG00000001986/ENSMUSG00000034656/ENSMUSG00000042228/ENSMUSG00000057614/ENSMUSG00000030102/ENSMUSG00000033910	Gnai2/Prkg1/Plcb3/Plcb4/Gucy1b1/Gnai3/Prkcb/Gria1/Itpr3/Gria3/Cacna1a/Lyn/Gnai1/Itpr1/Gucy1a1	mmu:14678/mmu:19091/mmu:18797/mmu:18798/mmu:54195/mmu:14679/mmu:18751/mmu:14799/mmu:16440/mmu:53623/mmu:12286/mmu:17096/mmu:14677/mmu:16438/mmu:60596	15
mmu05332	Graft-versus-host disease	11|674	37|6462	0.000986042	0.00662712	ENSMUSG00000035929/ENSMUSG00000061232/ENSMUSG00000073411/ENSMUSG00000067212/ENSMUSG00000024778/ENSMUSG00000016206/ENSMUSG00000073409/ENSMUSG00000073421/ENSMUSG00000060550/ENSMUSG00000056116/ENSMUSG00000022901	H2-Q4/H2-K1/H2-D1/H2-T23/Fas/H2-M3/H2-Q6/H2-Ab1/H2-Q7/H2-T22/Cd86	mmu:15015/mmu:14972/mmu:14964/mmu:15040/mmu:14102/mmu:14991/mmu:110557/mmu:14961/mmu:110558/mmu:15039/mmu:12524	11
mmu04658	Th1 and Th2 cell differentiation	18|674	80|6462	0.00120123	0.00788989	ENSMUSG00000026923/ENSMUSG00000031805/ENSMUSG00000028163/ENSMUSG00000026104/ENSMUSG00000002799/ENSMUSG00000014773/ENSMUSG00000002147/ENSMUSG00000027878/ENSMUSG00000055435/ENSMUSG00000016933/ENSMUSG00000073421/ENSMUSG00000031925/ENSMUSG00000038146/ENSMUSG00000046709/ENSMUSG00000020919/ENSMUSG00000004043/ENSMUSG00000026778/ENSMUSG00000061143	Notch1/Jak3/Nfkb1/Stat1/Jag2/Dll1/Stat6/Notch2/Maf/Plcg1/H2-Ab1/Maml2/Notch3/Mapk10/Stat5b/Stat5a/Prkcq/Maml3	mmu:18128/mmu:16453/mmu:18033/mmu:20846/mmu:16450/mmu:13388/mmu:20852/mmu:18129/mmu:17132/mmu:18803/mmu:14961/mmu:270118/mmu:18131/mmu:26414/mmu:20851/mmu:20850/mmu:18761/mmu:433586	18
mmu05330	Allograft rejection	11|674	38|6462	0.00125951	0.00808888	ENSMUSG00000035929/ENSMUSG00000061232/ENSMUSG00000073411/ENSMUSG00000067212/ENSMUSG00000024778/ENSMUSG00000016206/ENSMUSG00000073409/ENSMUSG00000073421/ENSMUSG00000060550/ENSMUSG00000056116/ENSMUSG00000022901	H2-Q4/H2-K1/H2-D1/H2-T23/Fas/H2-M3/H2-Q6/H2-Ab1/H2-Q7/H2-T22/Cd86	mmu:15015/mmu:14972/mmu:14964/mmu:15040/mmu:14102/mmu:14991/mmu:110557/mmu:14961/mmu:110558/mmu:15039/mmu:12524	11
mmu05414	Dilated cardiomyopathy (DCM)	19|674	87|6462	0.00129791	0.00815425	ENSMUSG00000026414/ENSMUSG00000025321/ENSMUSG00000001507/ENSMUSG00000029156/ENSMUSG00000015968/ENSMUSG00000010066/ENSMUSG00000027087/ENSMUSG00000027009/ENSMUSG00000003352/ENSMUSG00000039239/ENSMUSG00000028063/ENSMUSG00000027940/ENSMUSG00000017412/ENSMUSG00000025809/ENSMUSG00000005034/ENSMUSG00000031799/ENSMUSG00000039115/ENSMUSG00000027111/ENSMUSG00000022817	Tnnt2/Itgb8/Itga3/Sgcb/Cacna1d/Cacna2d2/Itgav/Itga4/Cacnb3/Tgfb2/Lmna/Tpm3/Cacnb4/Itgb1/Prkacb/Tpm4/Itga9/Itga6/Itgb5	mmu:21956/mmu:320910/mmu:16400/mmu:24051/mmu:12289/mmu:56808/mmu:16410/mmu:16401/mmu:12297/mmu:21808/mmu:16905/mmu:59069/mmu:12298/mmu:16412/mmu:18749/mmu:326618/mmu:104099/mmu:16403/mmu:16419	19
mmu04380	Osteoclast differentiation	23|674	114|6462	0.00133822	0.00822862	ENSMUSG00000053113/ENSMUSG00000030341/ENSMUSG00000052837/ENSMUSG00000014599/ENSMUSG00000026072/ENSMUSG00000002325/ENSMUSG00000028163/ENSMUSG00000024621/ENSMUSG00000026104/ENSMUSG00000059498/ENSMUSG00000003545/ENSMUSG00000030579/ENSMUSG00000025225/ENSMUSG00000023992/ENSMUSG00000019843/ENSMUSG00000039239/ENSMUSG00000032440/ENSMUSG00000006519/ENSMUSG00000046709/ENSMUSG00000026656/ENSMUSG00000040033/…	Socs3/Tnfrsf1a/Junb/Csf1/Il1r1/Irf9/Nfkb1/Csf1r/Stat1/Fcgr3/Fosb/Tyrobp/Nfkb2/Trem2/Fyn/Tgfb2/Tgfbr2/Cyba/Mapk10/Fcgr2b/Stat2/Fosl2/Gab2	mmu:12702/mmu:21937/mmu:16477/mmu:12977/mmu:16177/mmu:16391/mmu:18033/mmu:12978/mmu:20846/mmu:14131/mmu:14282/mmu:22177/mmu:18034/mmu:83433/mmu:14360/mmu:21808/mmu:21813/mmu:13057/mmu:26414/mmu:14130/mmu:20847/mmu:14284/mmu:14389	23
mmu05416	Viral myocarditis	15|674	62|6462	0.00139176	0.00831808	ENSMUSG00000035929/ENSMUSG00000061232/ENSMUSG00000037405/ENSMUSG00000073411/ENSMUSG00000007655/ENSMUSG00000067212/ENSMUSG00000029156/ENSMUSG00000000290/ENSMUSG00000019843/ENSMUSG00000016206/ENSMUSG00000073409/ENSMUSG00000073421/ENSMUSG00000060550/ENSMUSG00000056116/ENSMUSG00000022901	H2-Q4/H2-K1/Icam1/H2-D1/Cav1/H2-T23/Sgcb/Itgb2/Fyn/H2-M3/H2-Q6/H2-Ab1/H2-Q7/H2-T22/Cd86	mmu:15015/mmu:14972/mmu:15894/mmu:14964/mmu:12389/mmu:15040/mmu:24051/mmu:16414/mmu:14360/mmu:14991/mmu:110557/mmu:14961/mmu:110558/mmu:15039/mmu:12524	15
mmu05166	Human T-cell leukemia virus 1 infection	42|674	253|6462	0.00141033	0.00831808	ENSMUSG00000030341/ENSMUSG00000031805/ENSMUSG00000035929/ENSMUSG00000061232/ENSMUSG00000037405/ENSMUSG00000073411/ENSMUSG00000027962/ENSMUSG00000026072/ENSMUSG00000029231/ENSMUSG00000067212/ENSMUSG00000044786/ENSMUSG00000028163/ENSMUSG00000019982/ENSMUSG00000041075/ENSMUSG00000030339/ENSMUSG00000026628/ENSMUSG00000044674/ENSMUSG00000022895/ENSMUSG00000025225/ENSMUSG00000024620/ENSMUSG00000000290/…	Tnfrsf1a/Jak3/H2-Q4/H2-K1/Icam1/H2-D1/Vcam1/Il1r1/Pdgfra/H2-T23/Zfp36/Nfkb1/Myb/Fzd7/Ltbr/Atf3/Fzd1/Ets2/Nfkb2/Pdgfrb/Itgb2/Ccnd2/Bub1b/Wnt5a/H2-M3/H2-Q6/Tgfb2/Tgfbr2/Map3k1/Smad3/H2-Ab1/H2-Q7/Stat5b/Rras2/Prkacb/Tspo/H2-T22/Cdkn1a/Stat5a/Rras/Fzd6/Nfatc4	mmu:21937/mmu:16453/mmu:15015/mmu:14972/mmu:15894/mmu:14964/mmu:22329/mmu:16177/mmu:18595/mmu:15040/mmu:22695/mmu:18033/mmu:17863/mmu:14369/mmu:17000/mmu:11910/mmu:14362/mmu:23872/mmu:18034/mmu:18596/mmu:16414/mmu:12444/mmu:12236/mmu:22418/mmu:14991/mmu:110557/mmu:21808/mmu:21813/mmu:26401/mmu:17127/mmu:14961/mmu:110558/mmu:20851/mmu:66922/mmu:18749/mmu:12257/mmu:15039/mmu:12575/mmu:20850/mmu:201…	42
mmu04670	Leukocyte transendothelial migration	21|674	102|6462	0.00163736	0.00946396	ENSMUSG00000037405/ENSMUSG00000027962/ENSMUSG00000031207/ENSMUSG00000038235/ENSMUSG00000032562/ENSMUSG00000022469/ENSMUSG00000000290/ENSMUSG00000027009/ENSMUSG00000030786/ENSMUSG00000000001/ENSMUSG00000020580/ENSMUSG00000052889/ENSMUSG00000063063/ENSMUSG00000006519/ENSMUSG00000016933/ENSMUSG00000052397/ENSMUSG00000057614/ENSMUSG00000025809/ENSMUSG00000031990/ENSMUSG00000049044/ENSMUSG00000034116	Icam1/Vcam1/Msn/F11r/Gnai2/Rapgef3/Itgb2/Itga4/Itgam/Gnai3/Rock2/Prkcb/Ctnna2/Cyba/Plcg1/Ezr/Gnai1/Itgb1/Jam3/Rapgef4/Vav1	mmu:15894/mmu:22329/mmu:17698/mmu:16456/mmu:14678/mmu:223864/mmu:16414/mmu:16401/mmu:16409/mmu:14679/mmu:19878/mmu:18751/mmu:12386/mmu:13057/mmu:18803/mmu:22350/mmu:14677/mmu:16412/mmu:83964/mmu:56508/mmu:22324	21
mmu05164	Influenza A	27|674	144|6462	0.00169275	0.00959225	ENSMUSG00000053113/ENSMUSG00000030341/ENSMUSG00000037405/ENSMUSG00000024079/ENSMUSG00000020641/ENSMUSG00000040296/ENSMUSG00000002325/ENSMUSG00000026896/ENSMUSG00000028163/ENSMUSG00000024810/ENSMUSG00000034855/ENSMUSG00000026104/ENSMUSG00000025888/ENSMUSG00000024778/ENSMUSG00000039005/ENSMUSG00000035385/ENSMUSG00000052889/ENSMUSG00000052776/ENSMUSG00000059883/ENSMUSG00000073421/ENSMUSG00000032690/…	Socs3/Tnfrsf1a/Icam1/Eif2ak2/Rsad2/Ddx58/Irf9/Ifih1/Nfkb1/Il33/Cxcl10/Stat1/Casp1/Fas/Tlr4/Ccl2/Prkcb/Oas1a/Irak4/H2-Ab1/Oas2/Ccl12/Mapk10/Myd88/Mx2/Stat2/Oas1b	mmu:12702/mmu:21937/mmu:15894/mmu:19106/mmu:58185/mmu:230073/mmu:16391/mmu:71586/mmu:18033/mmu:77125/mmu:15945/mmu:20846/mmu:12362/mmu:14102/mmu:21898/mmu:20296/mmu:18751/mmu:246730/mmu:266632/mmu:14961/mmu:246728/mmu:20293/mmu:26414/mmu:17874/mmu:17858/mmu:20847/mmu:23961	27
mmu04971	Gastric acid secretion	16|674	70|6462	0.00185765	0.0102208	ENSMUSG00000032562/ENSMUSG00000033161/ENSMUSG00000032412/ENSMUSG00000024960/ENSMUSG00000039943/ENSMUSG00000000001/ENSMUSG00000052889/ENSMUSG00000042644/ENSMUSG00000052397/ENSMUSG00000040569/ENSMUSG00000057614/ENSMUSG00000057897/ENSMUSG00000005034/ENSMUSG00000030102/ENSMUSG00000024617/ENSMUSG00000021820	Gnai2/Atp1a1/Atp1b3/Plcb3/Plcb4/Gnai3/Prkcb/Itpr3/Ezr/Slc26a7/Gnai1/Camk2b/Prkacb/Itpr1/Camk2a/Camk2g	mmu:14678/mmu:11928/mmu:11933/mmu:18797/mmu:18798/mmu:14679/mmu:18751/mmu:16440/mmu:22350/mmu:208890/mmu:14677/mmu:12323/mmu:18749/mmu:16438/mmu:12322/mmu:12325	16
mmu05410	Hypertrophic cardiomyopathy (HCM)	18|674	83|6462	0.00187441	0.0102208	ENSMUSG00000026414/ENSMUSG00000025321/ENSMUSG00000001507/ENSMUSG00000029156/ENSMUSG00000015968/ENSMUSG00000010066/ENSMUSG00000027087/ENSMUSG00000027009/ENSMUSG00000003352/ENSMUSG00000039239/ENSMUSG00000028063/ENSMUSG00000027940/ENSMUSG00000017412/ENSMUSG00000025809/ENSMUSG00000031799/ENSMUSG00000039115/ENSMUSG00000027111/ENSMUSG00000022817	Tnnt2/Itgb8/Itga3/Sgcb/Cacna1d/Cacna2d2/Itgav/Itga4/Cacnb3/Tgfb2/Lmna/Tpm3/Cacnb4/Itgb1/Tpm4/Itga9/Itga6/Itgb5	mmu:21956/mmu:320910/mmu:16400/mmu:24051/mmu:12289/mmu:56808/mmu:16410/mmu:16401/mmu:12297/mmu:21808/mmu:16905/mmu:59069/mmu:12298/mmu:16412/mmu:326618/mmu:104099/mmu:16403/mmu:16419	18
mmu04612	Antigen processing and presentation	15|674	64|6462	0.00195865	0.0104824	ENSMUSG00000035929/ENSMUSG00000061232/ENSMUSG00000060802/ENSMUSG00000038642/ENSMUSG00000073411/ENSMUSG00000067212/ENSMUSG00000037321/ENSMUSG00000016206/ENSMUSG00000073409/ENSMUSG00000022216/ENSMUSG00000073421/ENSMUSG00000060550/ENSMUSG00000056116/ENSMUSG00000021477/ENSMUSG00000005774	H2-Q4/H2-K1/B2m/Ctss/H2-D1/H2-T23/Tap1/H2-M3/H2-Q6/Psme1/H2-Ab1/H2-Q7/H2-T22/Ctsl/Rfx5	mmu:15015/mmu:14972/mmu:12010/mmu:13040/mmu:14964/mmu:15040/mmu:21354/mmu:14991/mmu:110557/mmu:19186/mmu:14961/mmu:110558/mmu:15039/mmu:13039/mmu:53970	15
mmu04924	Renin secretion	15|674	65|6462	0.00230726	0.0116872	ENSMUSG00000030671/ENSMUSG00000032562/ENSMUSG00000028255/ENSMUSG00000015968/ENSMUSG00000024960/ENSMUSG00000039943/ENSMUSG00000028005/ENSMUSG00000000001/ENSMUSG00000042644/ENSMUSG00000057614/ENSMUSG00000042429/ENSMUSG00000005034/ENSMUSG00000004347/ENSMUSG00000030102/ENSMUSG00000033910	Pde3b/Gnai2/Clca1/Cacna1d/Plcb3/Plcb4/Gucy1b1/Gnai3/Itpr3/Gnai1/Adora1/Prkacb/Pde1c/Itpr1/Gucy1a1	mmu:18576/mmu:14678/mmu:23844/mmu:12289/mmu:18797/mmu:18798/mmu:54195/mmu:14679/mmu:16440/mmu:14677/mmu:11539/mmu:18749/mmu:18575/mmu:16438/mmu:60596	15
mmu04921	Oxytocin signaling pathway	27|674	147|6462	0.00230961	0.0116872	ENSMUSG00000032562/ENSMUSG00000015968/ENSMUSG00000020122/ENSMUSG00000010066/ENSMUSG00000028469/ENSMUSG00000024960/ENSMUSG00000003352/ENSMUSG00000039943/ENSMUSG00000028005/ENSMUSG00000000001/ENSMUSG00000020580/ENSMUSG00000052889/ENSMUSG00000049112/ENSMUSG00000042644/ENSMUSG00000017412/ENSMUSG00000057614/ENSMUSG00000057897/ENSMUSG00000030272/ENSMUSG00000005034/ENSMUSG00000030102/ENSMUSG00000032487/…	Gnai2/Cacna1d/Egfr/Cacna2d2/Npr2/Plcb3/Cacnb3/Plcb4/Gucy1b1/Gnai3/Rock2/Prkcb/Oxtr/Itpr3/Cacnb4/Gnai1/Camk2b/Camk1/Prkacb/Itpr1/Ptgs2/Camk2a/Cdkn1a/Pik3cg/Camk2g/Gucy1a1/Nfatc4	mmu:14678/mmu:12289/mmu:13649/mmu:56808/mmu:230103/mmu:18797/mmu:12297/mmu:18798/mmu:54195/mmu:14679/mmu:19878/mmu:18751/mmu:18430/mmu:16440/mmu:12298/mmu:14677/mmu:12323/mmu:52163/mmu:18749/mmu:16438/mmu:19225/mmu:12322/mmu:12575/mmu:30955/mmu:12325/mmu:60596/mmu:73181	27
mmu05152	Tuberculosis	27|674	147|6462	0.00230961	0.0116872	ENSMUSG00000030341/ENSMUSG00000038642/ENSMUSG00000028163/ENSMUSG00000026104/ENSMUSG00000059498/ENSMUSG00000027995/ENSMUSG00000000290/ENSMUSG00000030786/ENSMUSG00000039239/ENSMUSG00000039005/ENSMUSG00000056501/ENSMUSG00000059883/ENSMUSG00000024164/ENSMUSG00000073421/ENSMUSG00000031392/ENSMUSG00000046709/ENSMUSG00000032508/ENSMUSG00000060477/ENSMUSG00000026656/ENSMUSG00000057897/ENSMUSG00000022969/…	Tnfrsf1a/Ctss/Nfkb1/Stat1/Fcgr3/Tlr2/Itgb2/Itgam/Tgfb2/Tlr4/Cebpb/Irak4/C3/H2-Ab1/Irak1/Mapk10/Myd88/Irak2/Fcgr2b/Camk2b/Il10rb/Fcer1g/Lamp2/Camk2a/Tirap/Camk2g/Rfx5	mmu:21937/mmu:13040/mmu:18033/mmu:20846/mmu:14131/mmu:24088/mmu:16414/mmu:16409/mmu:21808/mmu:21898/mmu:12608/mmu:266632/mmu:12266/mmu:14961/mmu:16179/mmu:26414/mmu:17874/mmu:108960/mmu:14130/mmu:12323/mmu:16155/mmu:14127/mmu:16784/mmu:12322/mmu:117149/mmu:12325/mmu:53970	27
mmu04610	Complement and coagulation cascades	17|674	78|6462	0.00234552	0.0116872	ENSMUSG00000073418/ENSMUSG00000030111/ENSMUSG00000023224/ENSMUSG00000022037/ENSMUSG00000036905/ENSMUSG00000058952/ENSMUSG00000022912/ENSMUSG00000036887/ENSMUSG00000026365/ENSMUSG00000036896/ENSMUSG00000031538/ENSMUSG00000055172/ENSMUSG00000000290/ENSMUSG00000028128/ENSMUSG00000030786/ENSMUSG00000024164/ENSMUSG00000001930	C4b/A2m/Serping1/Clu/C1qb/Cfi/Pros1/C1qa/Cfh/C1qc/Plat/C1ra/Itgb2/F3/Itgam/C3/Vwf	mmu:12268/mmu:232345/mmu:12258/mmu:12759/mmu:12260/mmu:12630/mmu:19128/mmu:12259/mmu:12628/mmu:12262/mmu:18791/mmu:50909/mmu:16414/mmu:14066/mmu:16409/mmu:12266/mmu:22371	17
mmu05320	Autoimmune thyroid disease	11|674	41|6462	0.0024737	0.0120373	ENSMUSG00000035929/ENSMUSG00000061232/ENSMUSG00000073411/ENSMUSG00000067212/ENSMUSG00000024778/ENSMUSG00000016206/ENSMUSG00000073409/ENSMUSG00000073421/ENSMUSG00000060550/ENSMUSG00000056116/ENSMUSG00000022901	H2-Q4/H2-K1/H2-D1/H2-T23/Fas/H2-M3/H2-Q6/H2-Ab1/H2-Q7/H2-T22/Cd86	mmu:15015/mmu:14972/mmu:14964/mmu:15040/mmu:14102/mmu:14991/mmu:110557/mmu:14961/mmu:110558/mmu:15039/mmu:12524	11
mmu04923	Regulation of lipolysis in adipocytes	13|674	53|6462	0.00249909	0.0120373	ENSMUSG00000030671/ENSMUSG00000032562/ENSMUSG00000052920/ENSMUSG00000055980/ENSMUSG00000033174/ENSMUSG00000000001/ENSMUSG00000047250/ENSMUSG00000057614/ENSMUSG00000042429/ENSMUSG00000005034/ENSMUSG00000032487/ENSMUSG00000060675/ENSMUSG00000025509	Pde3b/Gnai2/Prkg1/Irs1/Mgll/Gnai3/Ptgs1/Gnai1/Adora1/Prkacb/Ptgs2/Pla2g16/Pnpla2	mmu:18576/mmu:14678/mmu:19091/mmu:16367/mmu:23945/mmu:14679/mmu:19224/mmu:14677/mmu:11539/mmu:18749/mmu:19225/mmu:225845/mmu:66853	13
mmu04810	Regulation of actin cytoskeleton	34|674	203|6462	0.00336708	0.0159522	ENSMUSG00000037225/ENSMUSG00000031565/ENSMUSG00000025321/ENSMUSG00000001507/ENSMUSG00000031207/ENSMUSG00000029231/ENSMUSG00000029622/ENSMUSG00000058325/ENSMUSG00000020122/ENSMUSG00000021676/ENSMUSG00000034616/ENSMUSG00000027087/ENSMUSG00000024620/ENSMUSG00000000290/ENSMUSG00000037509/ENSMUSG00000027009/ENSMUSG00000030786/ENSMUSG00000005640/ENSMUSG00000036402/ENSMUSG00000020580/ENSMUSG00000022488/…	Fgf2/Fgfr1/Itgb8/Itga3/Msn/Pdgfra/Arpc1b/Dock1/Egfr/Iqgap2/Ssh3/Itgav/Pdgfrb/Itgb2/Arhgef4/Itga4/Itgam/Insrr/Gng12/Rock2/Nckap1l/Ezr/Pip5k1b/Gsn/Pfn2/Fn1/Rras2/Itgb1/Fgfr2/Itga9/Vav1/Itga6/Itgb5/Rras	mmu:14173/mmu:14182/mmu:320910/mmu:16400/mmu:17698/mmu:18595/mmu:11867/mmu:330662/mmu:13649/mmu:544963/mmu:245857/mmu:16410/mmu:18596/mmu:16414/mmu:226970/mmu:16401/mmu:16409/mmu:23920/mmu:14701/mmu:19878/mmu:105855/mmu:22350/mmu:18719/mmu:227753/mmu:18645/mmu:14268/mmu:66922/mmu:16412/mmu:14183/mmu:104099/mmu:22324/mmu:16403/mmu:16419/mmu:20130	34
mmu04024	cAMP signaling pathway	32|674	191|6462	0.00435764	0.0201774	ENSMUSG00000061718/ENSMUSG00000030671/ENSMUSG00000024998/ENSMUSG00000028163/ENSMUSG00000032562/ENSMUSG00000033161/ENSMUSG00000025892/ENSMUSG00000015968/ENSMUSG00000032412/ENSMUSG00000000567/ENSMUSG00000022469/ENSMUSG00000000001/ENSMUSG00000020580/ENSMUSG00000049112/ENSMUSG00000020524/ENSMUSG00000001986/ENSMUSG00000032849/ENSMUSG00000046709/ENSMUSG00000055723/ENSMUSG00000057614/ENSMUSG00000057897/…	Ppp1r1b/Pde3b/Plce1/Nfkb1/Gnai2/Atp1a1/Gria4/Cacna1d/Atp1b3/Sox9/Rapgef3/Gnai3/Rock2/Oxtr/Gria1/Gria3/Abcc4/Mapk10/Rras2/Gnai1/Camk2b/Adora1/Prkacb/Rapgef4/Camk2a/Creb5/Vav1/Arap3/Cnga3/Camk2g/Rras/Pde4b	mmu:19049/mmu:18576/mmu:74055/mmu:18033/mmu:14678/mmu:11928/mmu:14802/mmu:12289/mmu:11933/mmu:20682/mmu:223864/mmu:14679/mmu:19878/mmu:18430/mmu:14799/mmu:53623/mmu:239273/mmu:26414/mmu:66922/mmu:14677/mmu:12323/mmu:11539/mmu:18749/mmu:56508/mmu:12322/mmu:231991/mmu:22324/mmu:106952/mmu:12790/mmu:12325/mmu:20130/mmu:18578	32
mmu04261	Adrenergic signaling in cardiomyocytes	25|674	139|6462	0.00439853	0.0201774	ENSMUSG00000026414/ENSMUSG00000034810/ENSMUSG00000027335/ENSMUSG00000032562/ENSMUSG00000033161/ENSMUSG00000015968/ENSMUSG00000010066/ENSMUSG00000032412/ENSMUSG00000022469/ENSMUSG00000024960/ENSMUSG00000003352/ENSMUSG00000039943/ENSMUSG00000000001/ENSMUSG00000027940/ENSMUSG00000017412/ENSMUSG00000029120/ENSMUSG00000057614/ENSMUSG00000057897/ENSMUSG00000005034/ENSMUSG00000049044/ENSMUSG00000031799/…	Tnnt2/Scn7a/Adra1d/Gnai2/Atp1a1/Cacna1d/Cacna2d2/Atp1b3/Rapgef3/Plcb3/Cacnb3/Plcb4/Gnai3/Tpm3/Cacnb4/Ppp2r2c/Gnai1/Camk2b/Prkacb/Rapgef4/Tpm4/Camk2a/Creb5/Pik3cg/Camk2g	mmu:21956/mmu:20272/mmu:11550/mmu:14678/mmu:11928/mmu:12289/mmu:56808/mmu:11933/mmu:223864/mmu:18797/mmu:12297/mmu:18798/mmu:14679/mmu:59069/mmu:12298/mmu:269643/mmu:14677/mmu:12323/mmu:18749/mmu:56508/mmu:326618/mmu:12322/mmu:231991/mmu:30955/mmu:12325	25
mmu04520	Adherens junction	15|674	70|6462	0.00490886	0.0221666	ENSMUSG00000031565/ENSMUSG00000022656/ENSMUSG00000006411/ENSMUSG00000020122/ENSMUSG00000019843/ENSMUSG00000025314/ENSMUSG00000032440/ENSMUSG00000063063/ENSMUSG00000027540/ENSMUSG00000032402/ENSMUSG00000033295/ENSMUSG00000062312/ENSMUSG00000004266/ENSMUSG00000055799/ENSMUSG00000000782	Fgfr1/Nectin3/Nectin4/Egfr/Fyn/Ptprj/Tgfbr2/Ctnna2/Ptpn1/Smad3/Ptprf/Erbb2/Ptpn6/Tcf7l1/Tcf7	mmu:14182/mmu:58998/mmu:71740/mmu:13649/mmu:14360/mmu:19271/mmu:21813/mmu:12386/mmu:19246/mmu:17127/mmu:19268/mmu:13866/mmu:15170/mmu:21415/mmu:21414	15
mmu04611	Platelet activation	22|674	120|6462	0.00578597	0.0257253	ENSMUSG00000032562/ENSMUSG00000052920/ENSMUSG00000024960/ENSMUSG00000019843/ENSMUSG00000039943/ENSMUSG00000028005/ENSMUSG00000000001/ENSMUSG00000020580/ENSMUSG00000042644/ENSMUSG00000047250/ENSMUSG00000042228/ENSMUSG00000001930/ENSMUSG00000057614/ENSMUSG00000025809/ENSMUSG00000036353/ENSMUSG00000005034/ENSMUSG00000029661/ENSMUSG00000058715/ENSMUSG00000029925/ENSMUSG00000030102/ENSMUSG00000020573/…	Gnai2/Prkg1/Plcb3/Fyn/Plcb4/Gucy1b1/Gnai3/Rock2/Itpr3/Ptgs1/Lyn/Vwf/Gnai1/Itgb1/P2ry12/Prkacb/Col1a2/Fcer1g/Tbxas1/Itpr1/Pik3cg/Gucy1a1	mmu:14678/mmu:19091/mmu:18797/mmu:14360/mmu:18798/mmu:54195/mmu:14679/mmu:19878/mmu:16440/mmu:19224/mmu:17096/mmu:22371/mmu:14677/mmu:16412/mmu:70839/mmu:18749/mmu:12843/mmu:14127/mmu:21391/mmu:16438/mmu:30955/mmu:60596	22
mmu04666	Fc gamma R-mediated phagocytosis	17|674	85|6462	0.00597435	0.0261604	ENSMUSG00000036995/ENSMUSG00000022272/ENSMUSG00000028517/ENSMUSG00000029622/ENSMUSG00000026395/ENSMUSG00000052889/ENSMUSG00000016933/ENSMUSG00000024867/ENSMUSG00000026879/ENSMUSG00000042228/ENSMUSG00000026656/ENSMUSG00000052632/ENSMUSG00000020143/ENSMUSG00000034116/ENSMUSG00000004508/ENSMUSG00000003283/ENSMUSG00000032737	Asap3/Myo10/Plpp3/Arpc1b/Ptprc/Prkcb/Plcg1/Pip5k1b/Gsn/Lyn/Fcgr2b/Asap2/Dock2/Vav1/Gab2/Hck/Inppl1	mmu:230837/mmu:17909/mmu:67916/mmu:11867/mmu:19264/mmu:18751/mmu:18803/mmu:18719/mmu:227753/mmu:17096/mmu:14130/mmu:211914/mmu:94176/mmu:22324/mmu:14389/mmu:15162/mmu:16332	17
mmu05161	Hepatitis B	23|674	128|6462	0.00623042	0.0268745	ENSMUSG00000004040/ENSMUSG00000040296/ENSMUSG00000026896/ENSMUSG00000028163/ENSMUSG00000026104/ENSMUSG00000027995/ENSMUSG00000024778/ENSMUSG00000002147/ENSMUSG00000039239/ENSMUSG00000039005/ENSMUSG00000040274/ENSMUSG00000052889/ENSMUSG00000021754/ENSMUSG00000046709/ENSMUSG00000032508/ENSMUSG00000020919/ENSMUSG00000040033/ENSMUSG00000053007/ENSMUSG00000023067/ENSMUSG00000032041/ENSMUSG00000004043/…	Stat3/Ddx58/Ifih1/Nfkb1/Stat1/Tlr2/Fas/Stat6/Tgfb2/Tlr4/Cdk6/Prkcb/Map3k1/Mapk10/Myd88/Stat5b/Stat2/Creb5/Cdkn1a/Tirap/Stat5a/Nfatc4/Casp12	mmu:20848/mmu:230073/mmu:71586/mmu:18033/mmu:20846/mmu:24088/mmu:14102/mmu:20852/mmu:21808/mmu:21898/mmu:12571/mmu:18751/mmu:26401/mmu:26414/mmu:17874/mmu:20851/mmu:20847/mmu:231991/mmu:12575/mmu:117149/mmu:20850/mmu:73181/mmu:12364	23
mmu04015	Rap1 signaling pathway	32|674	197|6462	0.00698598	0.0296904	ENSMUSG00000037225/ENSMUSG00000031565/ENSMUSG00000014599/ENSMUSG00000062960/ENSMUSG00000029231/ENSMUSG00000024998/ENSMUSG00000032562/ENSMUSG00000024621/ENSMUSG00000026821/ENSMUSG00000020122/ENSMUSG00000022469/ENSMUSG00000024620/ENSMUSG00000000290/ENSMUSG00000024960/ENSMUSG00000030786/ENSMUSG00000039943/ENSMUSG00000000001/ENSMUSG00000052889/ENSMUSG00000022148/ENSMUSG00000027954/ENSMUSG00000040152/…	Fgf2/Fgfr1/Csf1/Kdr/Pdgfra/Plce1/Gnai2/Csf1r/Ralgds/Egfr/Rapgef3/Pdgfrb/Itgb2/Plcb3/Itgam/Plcb4/Gnai3/Prkcb/Fyb/Efna1/Thbs1/Plcg1/Epha2/Pfn2/Gnai1/Itgb1/Fgfr2/Kitl/Rapgef4/Magi1/Arap3/Rras	mmu:14173/mmu:14182/mmu:12977/mmu:16542/mmu:18595/mmu:74055/mmu:14678/mmu:12978/mmu:19730/mmu:13649/mmu:223864/mmu:18596/mmu:16414/mmu:18797/mmu:16409/mmu:18798/mmu:14679/mmu:18751/mmu:23880/mmu:13636/mmu:21825/mmu:18803/mmu:13836/mmu:18645/mmu:14677/mmu:16412/mmu:14183/mmu:17311/mmu:56508/mmu:14924/mmu:106952/mmu:20130	32
mmu04072	Phospholipase D signaling pathway	24|674	138|6462	0.00797625	0.0334078	ENSMUSG00000028517/ENSMUSG00000029231/ENSMUSG00000028036/ENSMUSG00000026821/ENSMUSG00000020122/ENSMUSG00000040479/ENSMUSG00000022469/ENSMUSG00000031714/ENSMUSG00000024620/ENSMUSG00000024960/ENSMUSG00000019843/ENSMUSG00000039943/ENSMUSG00000018008/ENSMUSG00000016933/ENSMUSG00000024867/ENSMUSG00000070738/ENSMUSG00000055723/ENSMUSG00000019966/ENSMUSG00000049044/ENSMUSG00000058715/ENSMUSG00000004508/…	Plpp3/Pdgfra/Ptgfr/Ralgds/Egfr/Dgkz/Rapgef3/Gab1/Pdgfrb/Plcb3/Fyn/Plcb4/Cyth4/Plcg1/Pip5k1b/Dgkd/Rras2/Kitl/Rapgef4/Fcer1g/Gab2/Pik3cg/Dgkh/Rras	mmu:67916/mmu:18595/mmu:19220/mmu:19730/mmu:13649/mmu:104418/mmu:223864/mmu:14388/mmu:18596/mmu:18797/mmu:14360/mmu:18798/mmu:72318/mmu:18803/mmu:18719/mmu:227333/mmu:66922/mmu:17311/mmu:56508/mmu:14127/mmu:14389/mmu:30955/mmu:380921/mmu:20130	24
mmu04934	Cushing syndrome	25|674	147|6462	0.00912152	0.0376588	ENSMUSG00000019256/ENSMUSG00000041075/ENSMUSG00000032562/ENSMUSG00000044674/ENSMUSG00000015968/ENSMUSG00000020122/ENSMUSG00000024960/ENSMUSG00000021994/ENSMUSG00000039943/ENSMUSG00000040274/ENSMUSG00000000001/ENSMUSG00000042644/ENSMUSG00000020866/ENSMUSG00000057614/ENSMUSG00000057897/ENSMUSG00000005034/ENSMUSG00000055799/ENSMUSG00000030102/ENSMUSG00000024617/ENSMUSG00000053007/ENSMUSG00000000782/…	Ahr/Fzd7/Gnai2/Fzd1/Cacna1d/Egfr/Plcb3/Wnt5a/Plcb4/Cdk6/Gnai3/Itpr3/Cacna1g/Gnai1/Camk2b/Prkacb/Tcf7l1/Itpr1/Camk2a/Creb5/Tcf7/Cdkn1a/Camk2g/Fzd6/Kcnk3	mmu:11622/mmu:14369/mmu:14678/mmu:14362/mmu:12289/mmu:13649/mmu:18797/mmu:22418/mmu:18798/mmu:12571/mmu:14679/mmu:16440/mmu:12291/mmu:14677/mmu:12323/mmu:18749/mmu:21415/mmu:16438/mmu:12322/mmu:231991/mmu:21414/mmu:12575/mmu:12325/mmu:14368/mmu:16527	25
mmu04659	Th17 cell differentiation	18|674	96|6462	0.0094566	0.0384924	ENSMUSG00000004040/ENSMUSG00000031805/ENSMUSG00000019256/ENSMUSG00000026072/ENSMUSG00000028163/ENSMUSG00000026104/ENSMUSG00000021756/ENSMUSG00000027718/ENSMUSG00000002147/ENSMUSG00000022952/ENSMUSG00000032440/ENSMUSG00000032402/ENSMUSG00000016933/ENSMUSG00000073421/ENSMUSG00000046709/ENSMUSG00000020919/ENSMUSG00000004043/ENSMUSG00000026778	Stat3/Jak3/Ahr/Il1r1/Nfkb1/Stat1/Il6st/Il21/Stat6/Runx1/Tgfbr2/Smad3/Plcg1/H2-Ab1/Mapk10/Stat5b/Stat5a/Prkcq	mmu:20848/mmu:16453/mmu:11622/mmu:16177/mmu:18033/mmu:20846/mmu:16195/mmu:60505/mmu:20852/mmu:12394/mmu:21813/mmu:17127/mmu:18803/mmu:14961/mmu:26414/mmu:20851/mmu:20850/mmu:18761	18
mmu04925	Aldosterone synthesis and secretion	17|674	90|6462	0.0106783	0.0428615	ENSMUSG00000033161/ENSMUSG00000015968/ENSMUSG00000032412/ENSMUSG00000024960/ENSMUSG00000039943/ENSMUSG00000052889/ENSMUSG00000042644/ENSMUSG00000020866/ENSMUSG00000057897/ENSMUSG00000030272/ENSMUSG00000005034/ENSMUSG00000036760/ENSMUSG00000030102/ENSMUSG00000024617/ENSMUSG00000053007/ENSMUSG00000021820/ENSMUSG00000049265	Atp1a1/Cacna1d/Atp1b3/Plcb3/Plcb4/Prkcb/Itpr3/Cacna1g/Camk2b/Camk1/Prkacb/Kcnk9/Itpr1/Camk2a/Creb5/Camk2g/Kcnk3	mmu:11928/mmu:12289/mmu:11933/mmu:18797/mmu:18798/mmu:18751/mmu:16440/mmu:12291/mmu:12323/mmu:52163/mmu:18749/mmu:223604/mmu:16438/mmu:12322/mmu:231991/mmu:12325/mmu:16527	17
mmu05222	Small cell lung cancer	17|674	91|6462	0.011901	0.047115	ENSMUSG00000015312/ENSMUSG00000031502/ENSMUSG00000001507/ENSMUSG00000028163/ENSMUSG00000015647/ENSMUSG00000031273/ENSMUSG00000027087/ENSMUSG00000040274/ENSMUSG00000052911/ENSMUSG00000031274/ENSMUSG00000026193/ENSMUSG00000025809/ENSMUSG00000032487/ENSMUSG00000032796/ENSMUSG00000023067/ENSMUSG00000027111/ENSMUSG00000031503	Gadd45b/Col4a1/Itga3/Nfkb1/Lama5/Col4a6/Itgav/Cdk6/Lamb2/Col4a5/Fn1/Itgb1/Ptgs2/Lama1/Cdkn1a/Itga6/Col4a2	mmu:17873/mmu:12826/mmu:16400/mmu:18033/mmu:16776/mmu:94216/mmu:16410/mmu:12571/mmu:16779/mmu:12830/mmu:14268/mmu:16412/mmu:19225/mmu:16772/mmu:12575/mmu:16403/mmu:12827	17
mmu04310	Wnt signaling pathway	24|674	143|6462	0.0123003	0.0480375	ENSMUSG00000041075/ENSMUSG00000044674/ENSMUSG00000000184/ENSMUSG00000024960/ENSMUSG00000021994/ENSMUSG00000039943/ENSMUSG00000020580/ENSMUSG00000052889/ENSMUSG00000032402/ENSMUSG00000027860/ENSMUSG00000031548/ENSMUSG00000046709/ENSMUSG00000057897/ENSMUSG00000005034/ENSMUSG00000055799/ENSMUSG00000031119/ENSMUSG00000026556/ENSMUSG00000024617/ENSMUSG00000000782/ENSMUSG00000021820/ENSMUSG00000022433/…	Fzd7/Fzd1/Ccnd2/Plcb3/Wnt5a/Plcb4/Rock2/Prkcb/Smad3/Vangl1/Sfrp1/Mapk10/Camk2b/Prkacb/Tcf7l1/Gpc4/Vangl2/Camk2a/Tcf7/Camk2g/Csnk1e/Fzd6/Nfatc4/Lrp5	mmu:14369/mmu:14362/mmu:12444/mmu:18797/mmu:22418/mmu:18798/mmu:19878/mmu:18751/mmu:17127/mmu:229658/mmu:20377/mmu:26414/mmu:12323/mmu:18749/mmu:21415/mmu:14735/mmu:93840/mmu:12322/mmu:21414/mmu:12325/mmu:27373/mmu:14368/mmu:73181/mmu:16973	24
mmu05418	Fluid shear stress and atherosclerosis	23|674	136|6462	0.0128894	0.0496672	ENSMUSG00000030341/ENSMUSG00000037405/ENSMUSG00000007655/ENSMUSG00000027962/ENSMUSG00000062960/ENSMUSG00000026072/ENSMUSG00000028163/ENSMUSG00000031538/ENSMUSG00000008540/ENSMUSG00000027087/ENSMUSG00000076441/ENSMUSG00000026836/ENSMUSG00000058135/ENSMUSG00000035385/ENSMUSG00000006519/ENSMUSG00000035352/ENSMUSG00000001663/ENSMUSG00000046709/ENSMUSG00000021835/ENSMUSG00000071369/ENSMUSG00000000058/…	Tnfrsf1a/Icam1/Cav1/Vcam1/Kdr/Il1r1/Nfkb1/Plat/Mgst1/Itgav/Ass1/Acvr1/Gstm1/Ccl2/Cyba/Ccl12/Gstt1/Mapk10/Bmp4/Map3k5/Cav2/Ctsl/Hmox1	mmu:21937/mmu:15894/mmu:12389/mmu:22329/mmu:16542/mmu:16177/mmu:18033/mmu:18791/mmu:56615/mmu:16410/mmu:11898/mmu:11477/mmu:14862/mmu:20296/mmu:13057/mmu:20293/mmu:14871/mmu:26414/mmu:12159/mmu:26408/mmu:12390/mmu:13039/mmu:15368	23
