# Supplementary material for: Homeostatic plasticity in the retina is associated with maintenance of night vision during retinal degenerative disease
Source: eLife. 2020 Sep 22;9:e59422. doi: 10.7554/eLife.59422 (PMC7529457; doi:10.7554/eLife.59422)
Supplement: Supplementary file 17. [file elife-59422-supp17.xlsx]

## Sheet: P23HvsWT_down.Reactome_enrich_s
ReactomeID	Description	GeneRatio	BgRatio	pvalue	padj	geneID	geneName	EntrezID	Count
R-MMU-5617833	Cilium Assembly	44|587	196|7898	1.50334e-11	7.93324e-09	ENSMUSG00000031789/ENSMUSG00000030324/ENSMUSG00000030323/ENSMUSG00000037325/ENSMUSG00000038241/ENSMUSG00000022911/ENSMUSG00000035919/ENSMUSG00000042050/ENSMUSG00000021013/ENSMUSG00000031755/ENSMUSG00000025245/ENSMUSG00000027475/ENSMUSG00000006464/ENSMUSG00000039765/ENSMUSG00000038593/ENSMUSG00000029790/ENSMUSG00000029469/ENSMUSG00000029386/ENSMUSG00000025035/ENSMUSG00000023072/ENSMUSG00000041840/…	Cngb1/Rho/Ift122/Bbs7/Cep250/Arl13b/Bbs9/Wdr60/Ttc8/Bbs2/Lztfl1/Kif3b/Bbs1/Cc2d2a/Tctn1/Cep41/Ift81/Tctn2/Arl3/Cep89/Haus1/Wdr34/Tctn3/Cdk5rap2/Cep290/Cep63/Ift88/Mks1/Ttc30a1/Clasp1/Ofd1/Tmem67/Bbs5/Ttc30b/Sclt1/Cep152/Wdr35/Cct3/Ift43/Traf3ip1/Fgfr1op/Nphp4/Hsp90aa1/Bbip1	333329/212541/81896/71492/16328/68146/319845/217935/76260/67378/93730/16569/52028/231214/654470/83922/12589/67978/56350/72140/225745/71820/67590/214444/216274/28135/21821/380718/78802/76707/237222/329795/72569/72421/67161/99100/74682/12462/76411/74019/75296/260305/15519/100503572	44
R-MMU-2514856	The phototransduction cascade	16|587	29|7898	1.94204e-11	7.93324e-09	ENSMUSG00000031789/ENSMUSG00000030324/ENSMUSG00000056043/ENSMUSG00000029491/ENSMUSG00000025386/ENSMUSG00000067220/ENSMUSG00000042282/ENSMUSG00000034837/ENSMUSG00000020890/ENSMUSG00000032192/ENSMUSG00000029064/ENSMUSG00000023979/ENSMUSG00000023982/ENSMUSG00000020907/ENSMUSG00000020599/ENSMUSG00000033373	Cngb1/Rho/Rgs9bp/Pde6b/Pde6g/Cnga1/Gucy2f/Gnat1/Gucy2e/Gnb5/Gnb1/Guca1b/Guca1a/Rcvrn/Rgs9/Fntb	333329/212541/243923/18587/18588/12788/245650/14685/14919/14697/14688/107477/14913/19674/19739/110606	16
R-MMU-1852241	Organelle biogenesis and maintenance	46|587	222|7898	9.48812e-11	2.58393e-08	ENSMUSG00000031789/ENSMUSG00000030324/ENSMUSG00000030323/ENSMUSG00000037325/ENSMUSG00000038241/ENSMUSG00000022911/ENSMUSG00000035919/ENSMUSG00000042050/ENSMUSG00000021013/ENSMUSG00000031755/ENSMUSG00000025245/ENSMUSG00000029524/ENSMUSG00000027475/ENSMUSG00000006464/ENSMUSG00000039765/ENSMUSG00000038593/ENSMUSG00000029790/ENSMUSG00000029469/ENSMUSG00000027361/ENSMUSG00000029386/ENSMUSG00000025035/…	Cngb1/Rho/Ift122/Bbs7/Cep250/Arl13b/Bbs9/Wdr60/Ttc8/Bbs2/Lztfl1/Sirt4/Kif3b/Bbs1/Cc2d2a/Tctn1/Cep41/Ift81/Gabpb1/Tctn2/Arl3/Cep89/Haus1/Wdr34/Tctn3/Cdk5rap2/Cep290/Cep63/Ift88/Mks1/Ttc30a1/Clasp1/Ofd1/Tmem67/Bbs5/Ttc30b/Sclt1/Cep152/Wdr35/Cct3/Ift43/Traf3ip1/Fgfr1op/Nphp4/Hsp90aa1/Bbip1	333329/212541/81896/71492/16328/68146/319845/217935/76260/67378/93730/75387/16569/52028/231214/654470/83922/12589/14391/67978/56350/72140/225745/71820/67590/214444/216274/28135/21821/380718/78802/76707/237222/329795/72569/72421/67161/99100/74682/12462/76411/74019/75296/260305/15519/100503572	46
R-MMU-2514859	Inactivation, recovery and regulation of the phototransduction cascade	15|587	28|7898	1.48015e-10	3.0232e-08	ENSMUSG00000031789/ENSMUSG00000030324/ENSMUSG00000056043/ENSMUSG00000029491/ENSMUSG00000025386/ENSMUSG00000067220/ENSMUSG00000042282/ENSMUSG00000034837/ENSMUSG00000020890/ENSMUSG00000032192/ENSMUSG00000023979/ENSMUSG00000023982/ENSMUSG00000020907/ENSMUSG00000020599/ENSMUSG00000033373	Cngb1/Rho/Rgs9bp/Pde6b/Pde6g/Cnga1/Gucy2f/Gnat1/Gucy2e/Gnb5/Guca1b/Guca1a/Rcvrn/Rgs9/Fntb	333329/212541/243923/18587/18588/12788/245650/14685/14919/14697/107477/14913/19674/19739/110606	15
R-MMU-2187338	Visual phototransduction	21|587	87|7898	9.877e-07	0.00016139	ENSMUSG00000021123/ENSMUSG00000031789/ENSMUSG00000030324/ENSMUSG00000056043/ENSMUSG00000029491/ENSMUSG00000025386/ENSMUSG00000067220/ENSMUSG00000042282/ENSMUSG00000034837/ENSMUSG00000020890/ENSMUSG00000066026/ENSMUSG00000032192/ENSMUSG00000028125/ENSMUSG00000029064/ENSMUSG00000023979/ENSMUSG00000041534/ENSMUSG00000023982/ENSMUSG00000020907/ENSMUSG00000020599/ENSMUSG00000033373/ENSMUSG00000066441	Rdh12/Cngb1/Rho/Rgs9bp/Pde6b/Pde6g/Cnga1/Gucy2f/Gnat1/Gucy2e/Dhrs3/Gnb5/Abca4/Gnb1/Guca1b/Rbp3/Guca1a/Rcvrn/Rgs9/Fntb/Rdh11	77974/333329/212541/243923/18587/18588/12788/245650/14685/14919/20148/14697/11304/14688/107477/19661/14913/19674/19739/110606/17252	21
R-MMU-5620912	Anchoring of the basal body to the plasma membrane	20|587	96|7898	1.94544e-05	0.00240857	ENSMUSG00000038241/ENSMUSG00000039765/ENSMUSG00000038593/ENSMUSG00000029790/ENSMUSG00000029386/ENSMUSG00000023072/ENSMUSG00000041840/ENSMUSG00000025008/ENSMUSG00000039298/ENSMUSG00000019971/ENSMUSG00000032534/ENSMUSG00000034121/ENSMUSG00000064302/ENSMUSG00000040586/ENSMUSG00000049488/ENSMUSG00000059834/ENSMUSG00000068394/ENSMUSG00000069135/ENSMUSG00000039577/ENSMUSG00000021270	Cep250/Cc2d2a/Tctn1/Cep41/Tctn2/Cep89/Haus1/Tctn3/Cdk5rap2/Cep290/Cep63/Mks1/Clasp1/Ofd1/Tmem67/Sclt1/Cep152/Fgfr1op/Nphp4/Hsp90aa1	16328/231214/654470/83922/67978/72140/225745/67590/214444/216274/28135/380718/76707/237222/329795/67161/99100/75296/260305/15519	20
R-MMU-5620922	BBSome-mediated cargo-targeting to cilium	9|587	23|7898	2.06365e-05	0.00240857	ENSMUSG00000037325/ENSMUSG00000035919/ENSMUSG00000021013/ENSMUSG00000031755/ENSMUSG00000025245/ENSMUSG00000006464/ENSMUSG00000063145/ENSMUSG00000001416/ENSMUSG00000084957	Bbs7/Bbs9/Ttc8/Bbs2/Lztfl1/Bbs1/Bbs5/Cct3/Bbip1	71492/319845/76260/67378/93730/52028/72569/12462/100503572	9
R-MMU-5633007	Regulation of TP53 Activity	26|587	147|7898	2.5828e-05	0.00263768	ENSMUSG00000017146/ENSMUSG00000025417/ENSMUSG00000071646/ENSMUSG00000027715/ENSMUSG00000054321/ENSMUSG00000039117/ENSMUSG00000028630/ENSMUSG00000019970/ENSMUSG00000017843/ENSMUSG00000029513/ENSMUSG00000030528/ENSMUSG00000000552/ENSMUSG00000003068/ENSMUSG00000043866/ENSMUSG00000006288/ENSMUSG00000025646/ENSMUSG00000023104/ENSMUSG00000038569/ENSMUSG00000025049/ENSMUSG00000054387/ENSMUSG00000026283/…	Brca1/Pip4k2c/Mta2/Ccna2/Taf4b/Taf4/Dyrk2/Sgk1/Ppp2r5c/Prkab1/Blm/Zfp385a/Stk11/Taf10/Ttc5/Atrip/Rfc2/Rad9b/Taf5/Mdm4/Ing5/Ehmt1/Rffl/Aurka/Mre11a/Usp2	12189/117150/23942/12428/72504/228980/69181/20393/26931/19079/12144/29813/20869/24075/219022/235610/19718/231724/226182/17248/66262/77683/67338/20878/17535/53376	26
R-MMU-5620920	Cargo trafficking to the periciliary membrane	13|587	49|7898	3.996e-05	0.00362748	ENSMUSG00000031789/ENSMUSG00000030324/ENSMUSG00000037325/ENSMUSG00000022911/ENSMUSG00000035919/ENSMUSG00000021013/ENSMUSG00000031755/ENSMUSG00000025245/ENSMUSG00000006464/ENSMUSG00000025035/ENSMUSG00000063145/ENSMUSG00000001416/ENSMUSG00000084957	Cngb1/Rho/Bbs7/Arl13b/Bbs9/Ttc8/Bbs2/Lztfl1/Bbs1/Arl3/Bbs5/Cct3/Bbip1	333329/212541/71492/68146/319845/76260/67378/93730/52028/56350/72569/12462/100503572	13
R-MMU-5693579	Homologous DNA Pairing and Strand Exchange	11|587	38|7898	6.56129e-05	0.00536057	ENSMUSG00000017146/ENSMUSG00000030528/ENSMUSG00000028933/ENSMUSG00000027323/ENSMUSG00000007646/ENSMUSG00000025646/ENSMUSG00000023104/ENSMUSG00000030346/ENSMUSG00000038569/ENSMUSG00000041147/ENSMUSG00000031928	Brca1/Blm/Xrcc2/Rad51/Rad51c/Atrip/Rfc2/Rad51ap1/Rad9b/Brca2/Mre11a	12189/12144/57434/19361/114714/235610/19718/19362/231724/12190/17535	11
R-MMU-5685942	HDR through Homologous Recombination (HRR)	14|587	62|7898	0.000138418	0.0102806	ENSMUSG00000017146/ENSMUSG00000030726/ENSMUSG00000030528/ENSMUSG00000028933/ENSMUSG00000027323/ENSMUSG00000059772/ENSMUSG00000007646/ENSMUSG00000038644/ENSMUSG00000025646/ENSMUSG00000023104/ENSMUSG00000030346/ENSMUSG00000038569/ENSMUSG00000041147/ENSMUSG00000031928	Brca1/Pold3/Blm/Xrcc2/Rad51/Slx1b/Rad51c/Pold1/Atrip/Rfc2/Rad51ap1/Rad9b/Brca2/Mre11a	12189/67967/12144/57434/19361/75764/114714/18971/235610/19718/19362/231724/12190/17535	14
R-MMU-5693616	Presynaptic phase of homologous DNA pairing and strand exchange	10|587	35|7898	0.000159151	0.0108355	ENSMUSG00000017146/ENSMUSG00000030528/ENSMUSG00000028933/ENSMUSG00000027323/ENSMUSG00000007646/ENSMUSG00000025646/ENSMUSG00000023104/ENSMUSG00000038569/ENSMUSG00000041147/ENSMUSG00000031928	Brca1/Blm/Xrcc2/Rad51/Rad51c/Atrip/Rfc2/Rad9b/Brca2/Mre11a	12189/12144/57434/19361/114714/235610/19718/231724/12190/17535	10
R-MMU-5693568	Resolution of D-loop Structures through Holliday Junction Intermediates	9|587	31|7898	0.000296944	0.0179961	ENSMUSG00000017146/ENSMUSG00000030528/ENSMUSG00000028933/ENSMUSG00000027323/ENSMUSG00000059772/ENSMUSG00000007646/ENSMUSG00000030346/ENSMUSG00000041147/ENSMUSG00000031928	Brca1/Blm/Xrcc2/Rad51/Slx1b/Rad51c/Rad51ap1/Brca2/Mre11a	12189/12144/57434/19361/75764/114714/19362/12190/17535	9
R-MMU-5693554	Resolution of D-loop Structures through Synthesis-Dependent Strand Annealing (SDSA)	8|587	25|7898	0.000308379	0.0179961	ENSMUSG00000017146/ENSMUSG00000030528/ENSMUSG00000028933/ENSMUSG00000027323/ENSMUSG00000007646/ENSMUSG00000030346/ENSMUSG00000041147/ENSMUSG00000031928	Brca1/Blm/Xrcc2/Rad51/Rad51c/Rad51ap1/Brca2/Mre11a	12189/12144/57434/19361/114714/19362/12190/17535	8
R-MMU-6804756	Regulation of TP53 Activity through Phosphorylation	16|587	83|7898	0.000336288	0.0183165	ENSMUSG00000017146/ENSMUSG00000027715/ENSMUSG00000054321/ENSMUSG00000039117/ENSMUSG00000028630/ENSMUSG00000029513/ENSMUSG00000030528/ENSMUSG00000003068/ENSMUSG00000043866/ENSMUSG00000025646/ENSMUSG00000023104/ENSMUSG00000038569/ENSMUSG00000025049/ENSMUSG00000054387/ENSMUSG00000027496/ENSMUSG00000031928	Brca1/Ccna2/Taf4b/Taf4/Dyrk2/Prkab1/Blm/Stk11/Taf10/Atrip/Rfc2/Rad9b/Taf5/Mdm4/Aurka/Mre11a	12189/12428/72504/228980/69181/19079/12144/20869/24075/235610/19718/231724/226182/17248/20878/17535	16
R-MMU-5693537	Resolution of D-Loop Structures	9|587	32|7898	0.000386309	0.0197259	ENSMUSG00000017146/ENSMUSG00000030528/ENSMUSG00000028933/ENSMUSG00000027323/ENSMUSG00000059772/ENSMUSG00000007646/ENSMUSG00000030346/ENSMUSG00000041147/ENSMUSG00000031928	Brca1/Blm/Xrcc2/Rad51/Slx1b/Rad51c/Rad51ap1/Brca2/Mre11a	12189/12144/57434/19361/75764/114714/19362/12190/17535	9
R-MMU-1483206	Glycerophospholipid biosynthesis	19|587	112|7898	0.000536845	0.0258001	ENSMUSG00000040543/ENSMUSG00000001211/ENSMUSG00000027367/ENSMUSG00000029330/ENSMUSG00000037697/ENSMUSG00000054580/ENSMUSG00000022555/ENSMUSG00000020593/ENSMUSG00000024851/ENSMUSG00000031467/ENSMUSG00000028412/ENSMUSG00000020189/ENSMUSG00000024052/ENSMUSG00000054469/ENSMUSG00000030688/ENSMUSG00000041653/ENSMUSG00000041193/ENSMUSG00000025495/ENSMUSG00000040997	Pitpnm3/Agpat3/Stard7/Cds1/Ddhd1/Pla2r1/Dgat1/Lpin1/Pitpnm1/Agpat5/Slc44a1/Osbpl8/Lpin2/Lclat1/Stard10/Pnpla3/Pla2g5/Ptdss2/Abhd4	327958/28169/99138/74596/114874/18779/13350/14245/18739/52123/100434/237542/64898/225010/56018/116939/18784/27388/105501	19
