# Supplementary material for: Homeostatic plasticity in the retina is associated with maintenance of night vision during retinal degenerative disease
Source: eLife. 2020 Sep 22;9:e59422. doi: 10.7554/eLife.59422 (PMC7529457; doi:10.7554/eLife.59422)
Supplement: Supplementary file 18. [file elife-59422-supp18.xlsx]

## Sheet: P23HvsWT_up.Reactome_enrich_sig
ReactomeID	Description	GeneRatio	BgRatio	pvalue	padj	geneID	geneName	EntrezID	Count
R-MMU-1474244	Extracellular matrix organization	70|792	239|7898	2.0532e-17	1.74316e-14	ENSMUSG00000037225/ENSMUSG00000030111/ENSMUSG00000029718/ENSMUSG00000016763/ENSMUSG00000005087/ENSMUSG00000037405/ENSMUSG00000038642/ENSMUSG00000031502/ENSMUSG00000023191/ENSMUSG00000003534/ENSMUSG00000022098/ENSMUSG00000025321/ENSMUSG00000055447/ENSMUSG00000000957/ENSMUSG00000001507/ENSMUSG00000026674/ENSMUSG00000020674/ENSMUSG00000018593/ENSMUSG00000038235/ENSMUSG00000026509/ENSMUSG00000022483/…	Fgf2/A2m/Pcolce/Scube1/Cd44/Icam1/Ctss/Col4a1/P3h3/Ddr1/Bmp1/Itgb8/Cd47/Mmp14/Itga3/Ddr2/Pxdn/Sparc/F11r/Capn2/Col2a1/Ltbp3/Lama5/App/Col4a6/Loxl4/Agrn/Fbn1/Timp1/Ltbp1/Itgav/Col5a1/Itgb2/Plod2/Serpinh1/Nid2/Itga4/Efemp2/Fbln5/Cast/Tgfb2/Lamb2/Capns1/Col15a1/P3h1/Col4a5/Cd151/Adamts5/Capn3/Adamts4/Fn1/Vwf/Itgb1/Adam12/Bmp4/Jam3/Col1a2/Loxl1/Col23a1/Itga9/Lama1/Spock3/Itga6/Emilin1/Itgb5/Ctsl/Col4…	14173/232345/18542/64706/12505/15894/13040/12826/14789/12305/12153/320910/16423/17387/16400/18214/69675/20692/16456/12334/12824/16998/16776/11820/94216/67573/11603/14118/21857/268977/16410/12831/16414/26432/12406/18074/16401/58859/23876/12380/21808/16779/12336/12819/56401/12830/12476/23794/12335/240913/14268/22371/16412/11489/12159/83964/12843/16949/237759/104099/16772/72902/16403/100952/16419/13…	70
R-MMU-76002	Platelet activation, signaling and aggregation	56|792	234|7898	2.87358e-10	1.21983e-07	ENSMUSG00000030111/ENSMUSG00000023224/ENSMUSG00000022037/ENSMUSG00000024697/ENSMUSG00000028583/ENSMUSG00000023439/ENSMUSG00000033880/ENSMUSG00000020044/ENSMUSG00000022912/ENSMUSG00000031328/ENSMUSG00000025351/ENSMUSG00000018593/ENSMUSG00000030342/ENSMUSG00000038936/ENSMUSG00000029713/ENSMUSG00000026547/ENSMUSG00000032562/ENSMUSG00000064373/ENSMUSG00000027712/ENSMUSG00000022892/ENSMUSG00000032554/…	A2m/Serping1/Clu/Gna14/Pdpn/Gnb3/Lgals3bp/Timp3/Pros1/Flna/Cd63/Sparc/Cd9/Sccpdh/Gnb2/Tagln2/Gnai2/Selenop/Anxa5/App/Trf/Dgkz/Rapgef3/Timp1/Fyn/Tgfb2/Mgll/Gng12/Plek/Islr/Gnai3/Prkcb/Ptpn1/Itpr3/Abcc4/Lyn/Tor4a/Ptpn6/Fn1/Dgkd/Vwf/Gnai1/P2ry12/Prkch/Col1a2/Rapgef4/Fcer1g/Itpr1/Lamp2/Vav1/Fam49b/Qsox1/Pik3cg/Prkcq/Dgkh/Lhfpl2	232345/12258/12759/14675/14726/14695/19039/21859/19128/192176/12512/20692/12527/109232/14693/21346/14678/20363/11747/11820/22041/104418/223864/21857/14360/21808/23945/14701/56193/26968/14679/18751/19246/16440/239273/17096/227612/15170/14268/227333/22371/14677/70839/18755/12843/56508/14127/16438/16784/22324/223601/104009/30955/18761/380921/218454	56
R-MMU-109582	Hemostasis	91|792	487|7898	1.45289e-09	4.11167e-07	ENSMUSG00000030111/ENSMUSG00000023224/ENSMUSG00000022037/ENSMUSG00000024697/ENSMUSG00000005087/ENSMUSG00000028583/ENSMUSG00000023439/ENSMUSG00000033880/ENSMUSG00000007655/ENSMUSG00000020044/ENSMUSG00000022912/ENSMUSG00000031328/ENSMUSG00000055447/ENSMUSG00000001507/ENSMUSG00000025351/ENSMUSG00000026415/ENSMUSG00000018593/ENSMUSG00000030342/ENSMUSG00000038936/ENSMUSG00000029713/ENSMUSG00000038235/…	A2m/Serping1/Clu/Gna14/Cd44/Pdpn/Gnb3/Lgals3bp/Cav1/Timp3/Pros1/Flna/Cd47/Itga3/Cd63/Fcamr/Sparc/Cd9/Sccpdh/Gnb2/F11r/Tagln2/Gnai2/Plat/Prkg1/Selenop/Anxa5/App/Dock1/Tubb2b/Trf/Sri/Atp1b3/Prtn3/Dgkz/Rapgef3/Timp1/Itgav/S100a10/Itgb2/Pde5a/F3/Itga4/Fyn/Tgfb2/Mgll/Gng12/Plek/Islr/Mertk/P2rx7/Gnai3/Prkcb/Anxa2/Kif4/Lrp8/Ptpn1/Itpr3/Plcg1/Maff/Kif5a/Abcc4/Lyn/Tor4a/Ptpn6/Fn1/Dgkd/Vwf/Gnai1/Itgb1/P2ry…	232345/12258/12759/14675/12505/14726/14695/19039/12389/21859/19128/192176/16423/16400/12512/64435/20692/12527/109232/14693/16456/21346/14678/18791/19091/20363/11747/11820/330662/73710/22041/109552/11933/19152/104418/223864/21857/16410/20194/16414/242202/14066/16401/14360/21808/23945/14701/56193/26968/17289/18439/14679/18751/12306/16571/16975/19246/16440/18803/17133/16572/239273/17096/227612/15170…	91
R-MMU-216083	Integrin cell surface interactions	25|792	69|7898	4.1798e-09	8.87163e-07	ENSMUSG00000005087/ENSMUSG00000037405/ENSMUSG00000031502/ENSMUSG00000025321/ENSMUSG00000055447/ENSMUSG00000001507/ENSMUSG00000038235/ENSMUSG00000022483/ENSMUSG00000031273/ENSMUSG00000027204/ENSMUSG00000027087/ENSMUSG00000026837/ENSMUSG00000000290/ENSMUSG00000027009/ENSMUSG00000031274/ENSMUSG00000026193/ENSMUSG00000001930/ENSMUSG00000025809/ENSMUSG00000031990/ENSMUSG00000029661/ENSMUSG00000063564/…	Cd44/Icam1/Col4a1/Itgb8/Cd47/Itga3/F11r/Col2a1/Col4a6/Fbn1/Itgav/Col5a1/Itgb2/Itga4/Col4a5/Fn1/Vwf/Itgb1/Jam3/Col1a2/Col23a1/Itga9/Itga6/Itgb5/Col4a2	12505/15894/12826/320910/16423/16400/16456/12824/94216/14118/16410/12831/16414/16401/12830/14268/22371/16412/83964/12843/237759/104099/16403/16419/12827	25
R-MMU-3000171	Non-integrin membrane-ECM interactions	17|792	39|7898	5.39035e-08	9.15282e-06	ENSMUSG00000037225/ENSMUSG00000031502/ENSMUSG00000003534/ENSMUSG00000026674/ENSMUSG00000022483/ENSMUSG00000031273/ENSMUSG00000027087/ENSMUSG00000026837/ENSMUSG00000031274/ENSMUSG00000026193/ENSMUSG00000025809/ENSMUSG00000029661/ENSMUSG00000063564/ENSMUSG00000027111/ENSMUSG00000022817/ENSMUSG00000031503/ENSMUSG00000027966	Fgf2/Col4a1/Ddr1/Ddr2/Col2a1/Col4a6/Itgav/Col5a1/Col4a5/Fn1/Itgb1/Col1a2/Col23a1/Itga6/Itgb5/Col4a2/Col11a1	14173/12826/12305/18214/12824/94216/16410/12831/12830/14268/16412/12843/237759/16403/16419/12827/12814	17
R-MMU-112315	Transmission across Chemical Synapses	45|792	197|7898	7.60631e-08	1.07629e-05	ENSMUSG00000023439/ENSMUSG00000035200/ENSMUSG00000024935/ENSMUSG00000029713/ENSMUSG00000032562/ENSMUSG00000051359/ENSMUSG00000001985/ENSMUSG00000074991/ENSMUSG00000021057/ENSMUSG00000025892/ENSMUSG00000010066/ENSMUSG00000022462/ENSMUSG00000056073/ENSMUSG00000030098/ENSMUSG00000024960/ENSMUSG00000003352/ENSMUSG00000036402/ENSMUSG00000000001/ENSMUSG00000005360/ENSMUSG00000052889/ENSMUSG00000020524/…	Gnb3/Chrnb4/Slc1a1/Gnb2/Gnai2/Ncald/Grik3/Gabrr3/Akap5/Gria4/Cacna2d2/Slc38a2/Grik2/Grip2/Plcb3/Cacnb3/Gng12/Gnai3/Slc1a3/Prkcb/Gria1/Cacna1b/Gria3/Lin7b/Cacna1a/Cacnb4/Htr3a/Abat/Gnai1/Camk2b/Comt/Camk1/Rims1/Gabra1/Aldh2/Prkar1a/Epb41l1/Gabrg2/Rps6ka1/Camk2a/Camk2g/Slc6a1/Ppfia4/Slc5a7/Gabrb3	14695/108015/20510/14693/14678/52589/14807/328699/238276/14802/56808/67760/14806/243547/18797/12297/14701/14679/20512/18751/14799/12287/53623/22342/12286/12298/15561/268860/14677/12323/12846/52163/116837/14394/11669/19084/13821/14406/20111/12322/12325/232333/68507/63993/14402	45
R-MMU-2243919	Crosslinking of collagen fibrils	11|792	18|7898	1.585e-07	1.68404e-05	ENSMUSG00000029718/ENSMUSG00000031502/ENSMUSG00000022098/ENSMUSG00000020674/ENSMUSG00000031273/ENSMUSG00000025185/ENSMUSG00000031274/ENSMUSG00000029661/ENSMUSG00000032334/ENSMUSG00000063564/ENSMUSG00000031503	Pcolce/Col4a1/Bmp1/Pxdn/Col4a6/Loxl4/Col4a5/Col1a2/Loxl1/Col23a1/Col4a2	18542/12826/12153/69675/94216/67573/12830/12843/16949/237759/12827	11
R-MMU-1474228	Degradation of the extracellular matrix	29|792	103|7898	1.58684e-07	1.68404e-05	ENSMUSG00000030111/ENSMUSG00000016763/ENSMUSG00000005087/ENSMUSG00000038642/ENSMUSG00000031502/ENSMUSG00000022098/ENSMUSG00000000957/ENSMUSG00000026509/ENSMUSG00000022483/ENSMUSG00000031273/ENSMUSG00000027204/ENSMUSG00000001131/ENSMUSG00000026837/ENSMUSG00000021585/ENSMUSG00000001794/ENSMUSG00000028339/ENSMUSG00000031274/ENSMUSG00000022894/ENSMUSG00000079110/ENSMUSG00000006403/ENSMUSG00000026193/…	A2m/Scube1/Cd44/Ctss/Col4a1/Bmp1/Mmp14/Capn2/Col2a1/Col4a6/Fbn1/Timp1/Col5a1/Cast/Capns1/Col15a1/Col4a5/Adamts5/Capn3/Adamts4/Fn1/Col1a2/Col23a1/Spock3/Ctsl/Col4a2/Mmp24/Col11a1/Capn6	232345/64706/12505/13040/12826/12153/17387/12334/12824/94216/14118/21857/12831/12380/12336/12819/12830/23794/12335/240913/14268/12843/237759/72902/13039/12827/17391/12814/12338	29
R-MMU-1280215	Cytokine Signaling in Immune system	85|792	493|7898	2.40484e-07	2.26856e-05	ENSMUSG00000037225/ENSMUSG00000004040/ENSMUSG00000022146/ENSMUSG00000082361/ENSMUSG00000053113/ENSMUSG00000030341/ENSMUSG00000031805/ENSMUSG00000020227/ENSMUSG00000031565/ENSMUSG00000024079/ENSMUSG00000093661/ENSMUSG00000014599/ENSMUSG00000027078/ENSMUSG00000030671/ENSMUSG00000028599/ENSMUSG00000034394/ENSMUSG00000026072/ENSMUSG00000029231/ENSMUSG00000040296/ENSMUSG00000035692/ENSMUSG00000024338/…	Fgf2/Stat3/Osmr/Btc/Socs3/Tnfrsf1a/Jak3/Irak3/Fgfr1/Eif2ak2/Eif4e3/Csf1/Ube2l6/Pde3b/Tnfrsf1b/Lif/Il1r1/Pdgfra/Ddx58/Isg15/Psmb8/Irf9/Nfkb1/Il33/Csf1r/Ltbr/Usp18/Uba7/Il6st/App/Ghr/Nfkb2/Egfr/Irs1/Gab1/Pdgfrb/Casp1/Il21/Psmb9/Sptbn4/Stat6/Fyn/Ptprz1/Clcf1/Hmgb1/Gm21596/Ptpn1/Rasal3/Rasa4/Dusp6/Psme1/Tnip2/Plcg1/Irak4/Rasa2/Lyn/Erbb2/Nod1/Irak1/Ptpn6/Mapk10/Myd88/Mx2/Irak2/Stat5b/Fn1/Vwf/Camk2b/Da…	14173/20848/18414/12223/12702/21937/16453/73914/14182/19106/66892/12977/56791/18576/21938/16878/16177/18595/230073/100038882/16913/16391/18033/77125/12978/17000/24110/74153/16195/11820/14600/18034/13649/16367/14388/18596/12362/60505/16912/80297/20852/14360/19283/56708/15289/100862258/19246/320484/54153/67603/19186/231130/18803/266632/114713/17096/13866/107607/16179/15170/26414/17874/17858/108960/…	85
R-MMU-112316	Neuronal System	61|792	319|7898	3.88385e-07	3.29739e-05	ENSMUSG00000023439/ENSMUSG00000035200/ENSMUSG00000024935/ENSMUSG00000045246/ENSMUSG00000029713/ENSMUSG00000032562/ENSMUSG00000051359/ENSMUSG00000001985/ENSMUSG00000074991/ENSMUSG00000021057/ENSMUSG00000025892/ENSMUSG00000010066/ENSMUSG00000022462/ENSMUSG00000056073/ENSMUSG00000059714/ENSMUSG00000030098/ENSMUSG00000024960/ENSMUSG00000028631/ENSMUSG00000003352/ENSMUSG00000061981/ENSMUSG00000036402/…	Gnb3/Chrnb4/Slc1a1/Kcng4/Gnb2/Gnai2/Ncald/Grik3/Gabrr3/Akap5/Gria4/Cacna2d2/Slc38a2/Grik2/Flot1/Grip2/Plcb3/Kcnq4/Cacnb3/Flot2/Gng12/Ppfibp1/Kcnq2/Gnai3/Slc1a3/Prkcb/Gria1/Cacna1b/Ptprd/Gria3/Kcna5/Lin7b/Cacna1a/Cacnb4/Ptprf/Dlgap3/Htr3a/Abat/Gnai1/Camk2b/Abcc8/Comt/Camk1/Rims1/Kcnk9/Gabra1/Aldh2/Prkar1a/Epb41l1/Gabrg2/Slitrk5/Rps6ka1/Kcnk1/Camk2a/Lrfn4/Camk2g/Slc6a1/Ppfia4/Slc5a7/Kcnk3/Gabrb3	14695/108015/20510/66733/14693/14678/52589/14807/328699/238276/14802/56808/67760/14806/14251/243547/18797/60613/12297/14252/14701/67533/16536/14679/20512/18751/14799/12287/19266/53623/16493/22342/12286/12298/19268/242667/15561/268860/14677/12323/20927/12846/52163/116837/223604/14394/11669/19084/13821/14406/75409/20111/16525/12322/225875/12325/232333/68507/63993/16527/14402	61
R-MMU-2022090	Assembly of collagen fibrils and other multimeric structures	19|792	54|7898	5.23752e-07	4.04241e-05	ENSMUSG00000029718/ENSMUSG00000038642/ENSMUSG00000031502/ENSMUSG00000022098/ENSMUSG00000020674/ENSMUSG00000022483/ENSMUSG00000031273/ENSMUSG00000025185/ENSMUSG00000026837/ENSMUSG00000028339/ENSMUSG00000031274/ENSMUSG00000025510/ENSMUSG00000029661/ENSMUSG00000032334/ENSMUSG00000063564/ENSMUSG00000027111/ENSMUSG00000021477/ENSMUSG00000031503/ENSMUSG00000027966	Pcolce/Ctss/Col4a1/Bmp1/Pxdn/Col2a1/Col4a6/Loxl4/Col5a1/Col15a1/Col4a5/Cd151/Col1a2/Loxl1/Col23a1/Itga6/Ctsl/Col4a2/Col11a1	18542/13040/12826/12153/69675/12824/94216/67573/12831/12819/12830/12476/12843/16949/237759/16403/13039/12827/12814	19
R-MMU-1474290	Collagen formation	23|792	78|7898	1.25437e-06	8.87464e-05	ENSMUSG00000029718/ENSMUSG00000038642/ENSMUSG00000031502/ENSMUSG00000023191/ENSMUSG00000022098/ENSMUSG00000020674/ENSMUSG00000022483/ENSMUSG00000031273/ENSMUSG00000025185/ENSMUSG00000026837/ENSMUSG00000032374/ENSMUSG00000070436/ENSMUSG00000028339/ENSMUSG00000028641/ENSMUSG00000031274/ENSMUSG00000025510/ENSMUSG00000029661/ENSMUSG00000032334/ENSMUSG00000063564/ENSMUSG00000027111/ENSMUSG00000021477/…	Pcolce/Ctss/Col4a1/P3h3/Bmp1/Pxdn/Col2a1/Col4a6/Loxl4/Col5a1/Plod2/Serpinh1/Col15a1/P3h1/Col4a5/Cd151/Col1a2/Loxl1/Col23a1/Itga6/Ctsl/Col4a2/Col11a1	18542/13040/12826/14789/12153/69675/12824/94216/67573/12831/26432/12406/12819/56401/12830/12476/12843/16949/237759/16403/13039/12827/12814	23
R-MMU-76005	Response to elevated platelet cytosolic Ca2+	29|792	115|7898	1.97075e-06	0.000128705	ENSMUSG00000030111/ENSMUSG00000023224/ENSMUSG00000022037/ENSMUSG00000033880/ENSMUSG00000020044/ENSMUSG00000022912/ENSMUSG00000031328/ENSMUSG00000025351/ENSMUSG00000018593/ENSMUSG00000030342/ENSMUSG00000038936/ENSMUSG00000026547/ENSMUSG00000064373/ENSMUSG00000027712/ENSMUSG00000022892/ENSMUSG00000032554/ENSMUSG00000001131/ENSMUSG00000039239/ENSMUSG00000020120/ENSMUSG00000037206/ENSMUSG00000052889/…	A2m/Serping1/Clu/Lgals3bp/Timp3/Pros1/Flna/Cd63/Sparc/Cd9/Sccpdh/Tagln2/Selenop/Anxa5/App/Trf/Timp1/Tgfb2/Plek/Islr/Prkcb/Abcc4/Tor4a/Fn1/Vwf/Lamp2/Fam49b/Qsox1/Lhfpl2	232345/12258/12759/19039/21859/19128/192176/12512/20692/12527/109232/21346/20363/11747/11820/22041/21857/21808/56193/26968/18751/239273/227612/14268/22371/16784/223601/104009/218454	29
R-MMU-114608	Platelet degranulation	28|792	110|7898	2.42147e-06	0.000137838	ENSMUSG00000030111/ENSMUSG00000023224/ENSMUSG00000022037/ENSMUSG00000033880/ENSMUSG00000020044/ENSMUSG00000022912/ENSMUSG00000031328/ENSMUSG00000025351/ENSMUSG00000018593/ENSMUSG00000030342/ENSMUSG00000038936/ENSMUSG00000026547/ENSMUSG00000064373/ENSMUSG00000027712/ENSMUSG00000022892/ENSMUSG00000032554/ENSMUSG00000001131/ENSMUSG00000039239/ENSMUSG00000020120/ENSMUSG00000037206/ENSMUSG00000032849/…	A2m/Serping1/Clu/Lgals3bp/Timp3/Pros1/Flna/Cd63/Sparc/Cd9/Sccpdh/Tagln2/Selenop/Anxa5/App/Trf/Timp1/Tgfb2/Plek/Islr/Abcc4/Tor4a/Fn1/Vwf/Lamp2/Fam49b/Qsox1/Lhfpl2	232345/12258/12759/19039/21859/19128/192176/12512/20692/12527/109232/21346/20363/11747/11820/22041/21857/21808/56193/26968/239273/227612/14268/22371/16784/223601/104009/218454	28
R-MMU-3000157	Laminin interactions	12|792	26|7898	2.4353e-06	0.000137838	ENSMUSG00000031502/ENSMUSG00000001507/ENSMUSG00000015647/ENSMUSG00000031273/ENSMUSG00000021806/ENSMUSG00000052911/ENSMUSG00000031274/ENSMUSG00000025809/ENSMUSG00000063564/ENSMUSG00000032796/ENSMUSG00000027111/ENSMUSG00000031503	Col4a1/Itga3/Lama5/Col4a6/Nid2/Lamb2/Col4a5/Itgb1/Col23a1/Lama1/Itga6/Col4a2	12826/16400/16776/94216/18074/16779/12830/16412/237759/16772/16403/12827	12
R-MMU-913531	Interferon Signaling	17|792	51|7898	4.88545e-06	0.000255329	ENSMUSG00000053113/ENSMUSG00000024079/ENSMUSG00000093661/ENSMUSG00000027078/ENSMUSG00000040296/ENSMUSG00000035692/ENSMUSG00000002325/ENSMUSG00000030107/ENSMUSG00000032596/ENSMUSG00000027540/ENSMUSG00000016933/ENSMUSG00000004266/ENSMUSG00000023341/ENSMUSG00000057897/ENSMUSG00000024617/ENSMUSG00000021820/ENSMUSG00000025278	Socs3/Eif2ak2/Eif4e3/Ube2l6/Ddx58/Isg15/Irf9/Usp18/Uba7/Ptpn1/Plcg1/Ptpn6/Mx2/Camk2b/Camk2a/Camk2g/Flnb	12702/19106/66892/56791/230073/100038882/16391/24110/74153/19246/18803/15170/17858/12323/12322/12325/286940	17
R-MMU-198933	Immunoregulatory interactions between a Lymphoid and a non-Lymphoid cell	23|792	84|7898	5.11259e-06	0.000255329	ENSMUSG00000035929/ENSMUSG00000061232/ENSMUSG00000037405/ENSMUSG00000060802/ENSMUSG00000025492/ENSMUSG00000067212/ENSMUSG00000022483/ENSMUSG00000023992/ENSMUSG00000000290/ENSMUSG00000027009/ENSMUSG00000004609/ENSMUSG00000016206/ENSMUSG00000073409/ENSMUSG00000040511/ENSMUSG00000024164/ENSMUSG00000060550/ENSMUSG00000044811/ENSMUSG00000026656/ENSMUSG00000025809/ENSMUSG00000016494/ENSMUSG00000029661/…	H2-Q4/H2-K1/Icam1/B2m/Ifitm3/H2-T23/Col2a1/Trem2/Itgb2/Itga4/Cd33/H2-M3/H2-Q6/Pvr/C3/H2-Q7/Cd300c2/Fcgr2b/Itgb1/Cd34/Col1a2/H2-T22/Lair1	15015/14972/15894/12010/66141/15040/12824/83433/16414/16401/12489/14991/110557/52118/12266/15018/140497/14130/16412/12490/12843/15039/52855	23
R-MMU-1566948	Elastic fibre formation	15|792	42|7898	6.73311e-06	0.000317578	ENSMUSG00000025321/ENSMUSG00000024940/ENSMUSG00000025185/ENSMUSG00000027204/ENSMUSG00000001870/ENSMUSG00000027087/ENSMUSG00000024909/ENSMUSG00000021186/ENSMUSG00000039239/ENSMUSG00000026193/ENSMUSG00000025809/ENSMUSG00000021835/ENSMUSG00000032334/ENSMUSG00000029163/ENSMUSG00000022817	Itgb8/Ltbp3/Loxl4/Fbn1/Ltbp1/Itgav/Efemp2/Fbln5/Tgfb2/Fn1/Itgb1/Bmp4/Loxl1/Emilin1/Itgb5	320910/16998/67573/14118/268977/16410/58859/23876/21808/14268/16412/12159/16949/100952/16419	15
R-MMU-449147	Signaling by Interleukins	47|792	249|7898	1.24264e-05	0.000555265	ENSMUSG00000004040/ENSMUSG00000022146/ENSMUSG00000053113/ENSMUSG00000031805/ENSMUSG00000020227/ENSMUSG00000014599/ENSMUSG00000034394/ENSMUSG00000026072/ENSMUSG00000024338/ENSMUSG00000028163/ENSMUSG00000024810/ENSMUSG00000024621/ENSMUSG00000021756/ENSMUSG00000022892/ENSMUSG00000025225/ENSMUSG00000055980/ENSMUSG00000025888/ENSMUSG00000027718/ENSMUSG00000096727/ENSMUSG00000002147/ENSMUSG00000019843/…	Stat3/Osmr/Socs3/Jak3/Irak3/Csf1/Lif/Il1r1/Psmb8/Nfkb1/Il33/Csf1r/Il6st/App/Nfkb2/Irs1/Casp1/Il21/Psmb9/Stat6/Fyn/Ptprz1/Clcf1/Hmgb1/Gm21596/Dusp6/Psme1/Tnip2/Irak4/Lyn/Nod1/Irak1/Ptpn6/Mapk10/Myd88/Irak2/Stat5b/Map3k8/S100b/Rps6ka1/Vav1/Il13ra1/Mapkapk3/Stat5a/Hck/Ifnlr1/Inppl1	20848/18414/12702/16453/73914/12977/16878/16177/16913/18033/77125/12978/16195/11820/18034/16367/12362/60505/16912/20852/14360/19283/56708/15289/100862258/67603/19186/231130/266632/17096/107607/16179/15170/26414/17874/108960/20851/26410/20203/20111/22324/16164/102626/20850/15162/242700/16332	47
R-MMU-6798695	Neutrophil degranulation	74|792	457|7898	1.59873e-05	0.00067866	ENSMUSG00000035929/ENSMUSG00000005087/ENSMUSG00000061232/ENSMUSG00000064246/ENSMUSG00000060802/ENSMUSG00000038642/ENSMUSG00000035200/ENSMUSG00000028599/ENSMUSG00000026701/ENSMUSG00000055447/ENSMUSG00000030560/ENSMUSG00000025351/ENSMUSG00000056515/ENSMUSG00000067212/ENSMUSG00000028163/ENSMUSG00000032359/ENSMUSG00000022574/ENSMUSG00000046718/ENSMUSG00000030579/ENSMUSG00000021676/ENSMUSG00000057729/…	H2-Q4/Cd44/H2-K1/Chil1/B2m/Ctss/Chrnb4/Tnfrsf1b/Prdx6/Cd47/Ctsc/Cd63/Rab31/H2-T23/Nfkb1/Ctsh/Naprt/Bst2/Tyrobp/Iqgap2/Prtn3/Ano6/Mgst1/Cnn2/Itgav/Fgl2/Ptprc/Tlr2/Itgb2/Hexb/Sdcbp/Slc11a1/Cd33/H2-M3/H2-Q6/Ptprj/Hmgb1/Gm21596/Ckap4/S100a11/Cyb5r3/Slc2a3/Anxa2/Nckap1l/Cyba/Mvp/Cd53/C3/Mettl7a1/Gsn/Galns/Rab3d/H2-Q7/Plekho2/Cd300c2/Ptpn6/Ptprn2/Fcgr2b/Dock2/Fcer1g/H2-T22/Tmem173/Lamp2/Krt1/Lair1/Jup/…	15015/12505/14972/12654/12010/13040/108015/21938/11758/16423/13032/12512/106572/15040/18033/13036/223646/69550/22177/544963/19152/105722/56615/12798/16410/14190/19264/24088/16414/15212/53378/18173/12489/14991/110557/19271/15289/100862258/216197/20195/109754/20527/12306/105855/13057/78388/12508/12266/70152/227753/50917/19340/15018/102595/140497/15170/19276/14130/94176/14127/15039/72512/16784/16678…	74
R-MMU-2129379	Molecules associated with elastic fibres	13|792	35|7898	1.70349e-05	0.000688699	ENSMUSG00000025321/ENSMUSG00000024940/ENSMUSG00000027204/ENSMUSG00000001870/ENSMUSG00000027087/ENSMUSG00000024909/ENSMUSG00000021186/ENSMUSG00000039239/ENSMUSG00000026193/ENSMUSG00000025809/ENSMUSG00000021835/ENSMUSG00000029163/ENSMUSG00000022817	Itgb8/Ltbp3/Fbn1/Ltbp1/Itgav/Efemp2/Fbln5/Tgfb2/Fn1/Itgb1/Bmp4/Emilin1/Itgb5	320910/16998/14118/268977/16410/58859/23876/21808/14268/16412/12159/100952/16419	13
R-MMU-381426	Regulation of Insulin-like Growth Factor (IGF) transport and uptake by Insulin-like Growth Factor Binding Proteins (IGFBPs)	26|792	109|7898	1.9447e-05	0.000750477	ENSMUSG00000073418/ENSMUSG00000014599/ENSMUSG00000002985/ENSMUSG00000003617/ENSMUSG00000026185/ENSMUSG00000028195/ENSMUSG00000031283/ENSMUSG00000022892/ENSMUSG00000032554/ENSMUSG00000027204/ENSMUSG00000025647/ENSMUSG00000001131/ENSMUSG00000001870/ENSMUSG00000046841/ENSMUSG00000052911/ENSMUSG00000022816/ENSMUSG00000029070/ENSMUSG00000039405/ENSMUSG00000024164/ENSMUSG00000068220/ENSMUSG00000026193/…	C4b/Csf1/Apoe/Cp/Igfbp5/Ccn1/Chrdl1/App/Trf/Fbn1/Shisa5/Timp1/Ltbp1/Ckap4/Lamb2/Fstl1/Mxra8/Prss23/C3/Lgals1/Fn1/Bmp4/Golm1/Qsox1/Pnpla2/Igfbp6	12268/12977/11816/12870/16011/16007/83453/11820/22041/14118/66940/21857/268977/216197/16779/14314/74761/76453/12266/16852/14268/12159/105348/104009/66853/16012	26
R-MMU-8957275	Post-translational protein phosphorylation	25|792	103|7898	2.03659e-05	0.000751767	ENSMUSG00000073418/ENSMUSG00000014599/ENSMUSG00000002985/ENSMUSG00000003617/ENSMUSG00000026185/ENSMUSG00000028195/ENSMUSG00000031283/ENSMUSG00000022892/ENSMUSG00000032554/ENSMUSG00000027204/ENSMUSG00000025647/ENSMUSG00000001131/ENSMUSG00000001870/ENSMUSG00000046841/ENSMUSG00000052911/ENSMUSG00000022816/ENSMUSG00000029070/ENSMUSG00000039405/ENSMUSG00000024164/ENSMUSG00000068220/ENSMUSG00000026193/…	C4b/Csf1/Apoe/Cp/Igfbp5/Ccn1/Chrdl1/App/Trf/Fbn1/Shisa5/Timp1/Ltbp1/Ckap4/Lamb2/Fstl1/Mxra8/Prss23/C3/Lgals1/Fn1/Bmp4/Golm1/Qsox1/Pnpla2	12268/12977/11816/12870/16011/16007/83453/11820/22041/14118/66940/21857/268977/216197/16779/14314/74761/76453/12266/16852/14268/12159/105348/104009/66853	25
R-MMU-422356	Regulation of insulin secretion	17|792	57|7898	2.58885e-05	0.000915804	ENSMUSG00000024697/ENSMUSG00000023439/ENSMUSG00000029713/ENSMUSG00000032562/ENSMUSG00000015968/ENSMUSG00000010066/ENSMUSG00000022469/ENSMUSG00000024960/ENSMUSG00000003352/ENSMUSG00000036402/ENSMUSG00000042644/ENSMUSG00000032883/ENSMUSG00000034656/ENSMUSG00000057614/ENSMUSG00000040136/ENSMUSG00000049044/ENSMUSG00000030102	Gna14/Gnb3/Gnb2/Gnai2/Cacna1d/Cacna2d2/Rapgef3/Plcb3/Cacnb3/Gng12/Itpr3/Acsl3/Cacna1a/Gnai1/Abcc8/Rapgef4/Itpr1	14675/14695/14693/14678/12289/56808/223864/18797/12297/14701/16440/74205/12286/14677/20927/56508/16438	17
R-MMU-1500931	Cell-Cell communication	21|792	83|7898	4.7986e-05	0.0016296	ENSMUSG00000068699/ENSMUSG00000031328/ENSMUSG00000055447/ENSMUSG00000022656/ENSMUSG00000059182/ENSMUSG00000038235/ENSMUSG00000006411/ENSMUSG00000031841/ENSMUSG00000030579/ENSMUSG00000031673/ENSMUSG00000019843/ENSMUSG00000040511/ENSMUSG00000022148/ENSMUSG00000005338/ENSMUSG00000025510/ENSMUSG00000025809/ENSMUSG00000001552/ENSMUSG00000061048/ENSMUSG00000027111/ENSMUSG00000006219/ENSMUSG00000072115	Flnc/Flna/Cd47/Nectin3/Skap2/F11r/Nectin4/Cdh13/Tyrobp/Cdh11/Fyn/Pvr/Fyb/Cadm3/Cd151/Itgb1/Jup/Cdh3/Itga6/Fblim1/Ang	68794/192176/16423/58998/54353/16456/71740/12554/22177/12552/14360/52118/23880/94332/12476/16412/16480/12560/16403/74202/11727	21
R-MMU-112314	Neurotransmitter receptors and postsynaptic signal transmission	29|792	135|7898	5.39795e-05	0.00176264	ENSMUSG00000023439/ENSMUSG00000035200/ENSMUSG00000029713/ENSMUSG00000032562/ENSMUSG00000051359/ENSMUSG00000001985/ENSMUSG00000074991/ENSMUSG00000021057/ENSMUSG00000025892/ENSMUSG00000056073/ENSMUSG00000030098/ENSMUSG00000024960/ENSMUSG00000036402/ENSMUSG00000000001/ENSMUSG00000052889/ENSMUSG00000020524/ENSMUSG00000001986/ENSMUSG00000032269/ENSMUSG00000057614/ENSMUSG00000057897/ENSMUSG00000030272/…	Gnb3/Chrnb4/Gnb2/Gnai2/Ncald/Grik3/Gabrr3/Akap5/Gria4/Grik2/Grip2/Plcb3/Gng12/Gnai3/Prkcb/Gria1/Gria3/Htr3a/Gnai1/Camk2b/Camk1/Gabra1/Prkar1a/Epb41l1/Gabrg2/Rps6ka1/Camk2a/Camk2g/Gabrb3	14695/108015/14693/14678/52589/14807/328699/238276/14802/14806/243547/18797/14701/14679/18751/14799/53623/15561/14677/12323/52163/14394/19084/13821/14406/20111/12322/12325/14402	29
R-MMU-1236977	Endosomal/Vacuolar pathway	8|792	17|7898	0.000105167	0.00326943	ENSMUSG00000035929/ENSMUSG00000061232/ENSMUSG00000060802/ENSMUSG00000067212/ENSMUSG00000016206/ENSMUSG00000073409/ENSMUSG00000060550/ENSMUSG00000056116	H2-Q4/H2-K1/B2m/H2-T23/H2-M3/H2-Q6/H2-Q7/H2-T22	15015/14972/12010/15040/14991/110557/15018/15039	8
R-MMU-399719	Trafficking of AMPA receptors	10|792	26|7898	0.000115528	0.00326943	ENSMUSG00000021057/ENSMUSG00000025892/ENSMUSG00000030098/ENSMUSG00000052889/ENSMUSG00000020524/ENSMUSG00000001986/ENSMUSG00000057897/ENSMUSG00000027624/ENSMUSG00000024617/ENSMUSG00000021820	Akap5/Gria4/Grip2/Prkcb/Gria1/Gria3/Camk2b/Epb41l1/Camk2a/Camk2g	238276/14802/243547/18751/14799/53623/12323/13821/12322/12325	10
R-MMU-399721	Glutamate binding, activation of AMPA receptors and synaptic plasticity	10|792	26|7898	0.000115528	0.00326943	ENSMUSG00000021057/ENSMUSG00000025892/ENSMUSG00000030098/ENSMUSG00000052889/ENSMUSG00000020524/ENSMUSG00000001986/ENSMUSG00000057897/ENSMUSG00000027624/ENSMUSG00000024617/ENSMUSG00000021820	Akap5/Gria4/Grip2/Prkcb/Gria1/Gria3/Camk2b/Epb41l1/Camk2a/Camk2g	238276/14802/243547/18751/14799/53623/12323/13821/12322/12325	10
R-MMU-8874081	MET activates PTK2 signaling	10|792	26|7898	0.000115528	0.00326943	ENSMUSG00000001507/ENSMUSG00000022483/ENSMUSG00000015647/ENSMUSG00000026837/ENSMUSG00000052911/ENSMUSG00000026193/ENSMUSG00000025809/ENSMUSG00000029661/ENSMUSG00000032796/ENSMUSG00000027966	Itga3/Col2a1/Lama5/Col5a1/Lamb2/Fn1/Itgb1/Col1a2/Lama1/Col11a1	16400/12824/16776/12831/16779/14268/16412/12843/16772/12814	10
R-MMU-163685	Integration of energy metabolism	19|792	76|7898	0.000129442	0.00354505	ENSMUSG00000024697/ENSMUSG00000023439/ENSMUSG00000029713/ENSMUSG00000032562/ENSMUSG00000015968/ENSMUSG00000010066/ENSMUSG00000022469/ENSMUSG00000024960/ENSMUSG00000003352/ENSMUSG00000036402/ENSMUSG00000042644/ENSMUSG00000032883/ENSMUSG00000034656/ENSMUSG00000057614/ENSMUSG00000040136/ENSMUSG00000021957/ENSMUSG00000049044/ENSMUSG00000020612/ENSMUSG00000030102	Gna14/Gnb3/Gnb2/Gnai2/Cacna1d/Cacna2d2/Rapgef3/Plcb3/Cacnb3/Gng12/Itpr3/Acsl3/Cacna1a/Gnai1/Abcc8/Tkt/Rapgef4/Prkar1a/Itpr1	14675/14695/14693/14678/12289/56808/223864/18797/12297/14701/16440/74205/12286/14677/20927/21881/56508/19084/16438	19
R-MMU-1650814	Collagen biosynthesis and modifying enzymes	16|792	59|7898	0.000156986	0.00416503	ENSMUSG00000029718/ENSMUSG00000031502/ENSMUSG00000023191/ENSMUSG00000022098/ENSMUSG00000022483/ENSMUSG00000031273/ENSMUSG00000026837/ENSMUSG00000032374/ENSMUSG00000070436/ENSMUSG00000028339/ENSMUSG00000028641/ENSMUSG00000031274/ENSMUSG00000029661/ENSMUSG00000063564/ENSMUSG00000031503/ENSMUSG00000027966	Pcolce/Col4a1/P3h3/Bmp1/Col2a1/Col4a6/Col5a1/Plod2/Serpinh1/Col15a1/P3h1/Col4a5/Col1a2/Col23a1/Col4a2/Col11a1	18542/12826/14789/12153/12824/94216/12831/26432/12406/12819/56401/12830/12843/237759/12827/12814	16
R-MMU-422475	Axon guidance	45|792	260|7898	0.000166307	0.00417412	ENSMUSG00000031502/ENSMUSG00000031565/ENSMUSG00000030123/ENSMUSG00000056427/ENSMUSG00000031207/ENSMUSG00000022483/ENSMUSG00000030579/ENSMUSG00000029622/ENSMUSG00000026640/ENSMUSG00000058325/ENSMUSG00000020122/ENSMUSG00000045136/ENSMUSG00000002233/ENSMUSG00000023992/ENSMUSG00000027087/ENSMUSG00000031714/ENSMUSG00000026837/ENSMUSG00000026395/ENSMUSG00000063531/ENSMUSG00000028249/ENSMUSG00000011751/…	Col4a1/Fgfr1/Plxnd1/Slit3/Msn/Col2a1/Tyrobp/Arpc1b/Plxna2/Dock1/Egfr/Tubb2b/Rhoc/Trem2/Itgav/Gab1/Col5a1/Ptprc/Sema3e/Sdcbp/Sptbn4/Fyn/Rock2/Efna1/Kif4/Plxna1/Col4a5/Plcg1/Ezr/Lyn/Epha2/Erbb2/Pfn2/Efnb1/Itgb1/Gap43/Trio/Col23a1/Itga9/Efnb2/Slit2/Col4a2/Prkcq/Rras/Dab1	12826/14182/67784/20564/17698/12824/22177/11867/18845/330662/13649/73710/11853/83433/16410/14388/12831/19264/20349/53378/80297/14360/19878/13636/16571/18844/12830/18803/22350/17096/13836/13866/18645/13641/16412/14432/223435/237759/104099/13642/20563/12827/18761/20130/13131	45
R-MMU-1169408	ISG15 antiviral mechanism	10|792	27|7898	0.000167161	0.00417412	ENSMUSG00000024079/ENSMUSG00000093661/ENSMUSG00000027078/ENSMUSG00000040296/ENSMUSG00000035692/ENSMUSG00000030107/ENSMUSG00000032596/ENSMUSG00000016933/ENSMUSG00000023341/ENSMUSG00000025278	Eif2ak2/Eif4e3/Ube2l6/Ddx58/Isg15/Usp18/Uba7/Plcg1/Mx2/Flnb	19106/66892/56791/230073/100038882/24110/74153/18803/17858/286940	10
R-MMU-2214320	Anchoring fibril formation	7|792	14|7898	0.000181139	0.00439392	ENSMUSG00000031502/ENSMUSG00000022098/ENSMUSG00000031273/ENSMUSG00000031274/ENSMUSG00000029661/ENSMUSG00000063564/ENSMUSG00000031503	Col4a1/Bmp1/Col4a6/Col4a5/Col1a2/Col23a1/Col4a2	12826/12153/94216/12830/12843/237759/12827	7
R-MMU-186797	Signaling by PDGF	15|792	54|7898	0.000187159	0.00441383	ENSMUSG00000004040/ENSMUSG00000031502/ENSMUSG00000029231/ENSMUSG00000031538/ENSMUSG00000022483/ENSMUSG00000024620/ENSMUSG00000026837/ENSMUSG00000023885/ENSMUSG00000002147/ENSMUSG00000031274/ENSMUSG00000016933/ENSMUSG00000020919/ENSMUSG00000063564/ENSMUSG00000004043/ENSMUSG00000031503	Stat3/Col4a1/Pdgfra/Plat/Col2a1/Pdgfrb/Col5a1/Thbs2/Stat6/Col4a5/Plcg1/Stat5b/Col23a1/Stat5a/Col4a2	20848/12826/18595/18791/12824/18596/12831/21826/20852/12830/18803/20851/237759/20850/12827	15
R-MMU-168898	Toll-like Receptor Cascades	27|792	131|7898	0.000201047	0.00461322	ENSMUSG00000038642/ENSMUSG00000028163/ENSMUSG00000021423/ENSMUSG00000044080/ENSMUSG00000022892/ENSMUSG00000025225/ENSMUSG00000027995/ENSMUSG00000000290/ENSMUSG00000036908/ENSMUSG00000039005/ENSMUSG00000066551/ENSMUSG00000066551/ENSMUSG00000021624/ENSMUSG00000019960/ENSMUSG00000059866/ENSMUSG00000059883/ENSMUSG00000038058/ENSMUSG00000031392/ENSMUSG00000046709/ENSMUSG00000032508/ENSMUSG00000060477/…	Ctss/Nfkb1/Ly86/S100a1/App/Nfkb2/Tlr2/Itgb2/Unc93b1/Tlr4/Hmgb1/Gm21596/Cd180/Dusp6/Tnip2/Irak4/Nod1/Irak1/Mapk10/Myd88/Irak2/Map3k8/S100b/Rps6ka1/Mapkapk3/Tirap/Ctsl	13040/18033/17084/20193/11820/18034/24088/16414/54445/21898/15289/100862258/17079/67603/231130/266632/107607/16179/26414/17874/108960/26410/20203/20111/102626/117149/13039	27
R-MMU-5576891	Cardiac conduction	25|792	118|7898	0.000218529	0.0048445	ENSMUSG00000034810/ENSMUSG00000033161/ENSMUSG00000015968/ENSMUSG00000003161/ENSMUSG00000010066/ENSMUSG00000032412/ENSMUSG00000028469/ENSMUSG00000003352/ENSMUSG00000028207/ENSMUSG00000053519/ENSMUSG00000030409/ENSMUSG00000090122/ENSMUSG00000042644/ENSMUSG00000057182/ENSMUSG00000017412/ENSMUSG00000057897/ENSMUSG00000036760/ENSMUSG00000064329/ENSMUSG00000030102/ENSMUSG00000023033/ENSMUSG00000033998/…	Scn7a/Atp1a1/Cacna1d/Sri/Cacna2d2/Atp1b3/Npr2/Cacnb3/Asph/Kcnip1/Dmpk/Kcne1l/Itpr3/Scn3a/Cacnb4/Camk2b/Kcnk9/Scn1a/Itpr1/Scn8a/Kcnk1/Camk2a/Camk2g/Scn3b/Kcnk3	20272/11928/12289/109552/56808/11933/230103/12297/65973/70357/13400/66240/16440/20269/12298/12323/223604/20265/16438/20273/16525/12322/12325/235281/16527	25
R-MMU-1266738	Developmental Biology	59|792	373|7898	0.000228221	0.0048445	ENSMUSG00000031502/ENSMUSG00000031565/ENSMUSG00000030123/ENSMUSG00000056427/ENSMUSG00000031207/ENSMUSG00000034957/ENSMUSG00000022483/ENSMUSG00000030579/ENSMUSG00000029622/ENSMUSG00000026640/ENSMUSG00000058325/ENSMUSG00000020122/ENSMUSG00000045136/ENSMUSG00000002233/ENSMUSG00000036560/ENSMUSG00000023992/ENSMUSG00000027087/ENSMUSG00000031714/ENSMUSG00000026837/ENSMUSG00000026395/ENSMUSG00000063531/…	Col4a1/Fgfr1/Plxnd1/Slit3/Msn/Cebpa/Col2a1/Tyrobp/Arpc1b/Plxna2/Dock1/Egfr/Tubb2b/Rhoc/Lgi4/Trem2/Itgav/Gab1/Col5a1/Ptprc/Sema3e/Sdcbp/Sptbn4/Fyn/Capns1/Rock2/Adam23/Efna1/Kif4/Ctnna2/Kazn/Plxna1/Smad3/Col4a5/Plcg1/Ezr/Lyn/Epha2/Erbb2/Pfn2/Efnb1/Itgb1/Boc/Tcf4/Gap43/Trio/Col23a1/Itga9/St14/Krt1/Efnb2/Jup/Slit2/Cdkn1a/Col4a2/Perp/Prkcq/Rras/Dab1	12826/14182/67784/20564/17698/12606/12824/22177/11867/18845/330662/13649/73710/11853/243914/83433/16410/14388/12831/19264/20349/53378/80297/14360/12336/19878/23792/13636/16571/12386/71529/18844/17127/12830/18803/22350/17096/13836/13866/18645/13641/16412/117606/21413/14432/223435/237759/104099/19143/16678/13642/16480/20563/12575/12827/64058/18761/20130/13131	59
R-MMU-9006934	Signaling by Receptor Tyrosine Kinases	61|792	389|7898	0.000228245	0.0048445	ENSMUSG00000037225/ENSMUSG00000004040/ENSMUSG00000082361/ENSMUSG00000031502/ENSMUSG00000031565/ENSMUSG00000007655/ENSMUSG00000030671/ENSMUSG00000001507/ENSMUSG00000002602/ENSMUSG00000029231/ENSMUSG00000031538/ENSMUSG00000022483/ENSMUSG00000015647/ENSMUSG00000037211/ENSMUSG00000026821/ENSMUSG00000058325/ENSMUSG00000020122/ENSMUSG00000055980/ENSMUSG00000027087/ENSMUSG00000031714/ENSMUSG00000024620/…	Fgf2/Stat3/Btc/Col4a1/Fgfr1/Cav1/Pde3b/Itga3/Axl/Pdgfra/Plat/Col2a1/Lama5/Spry1/Ralgds/Dock1/Egfr/Irs1/Itgav/Gab1/Pdgfrb/Col5a1/Thbs2/Mknk1/Stat6/Fyn/Ntrk2/Ptprj/Lamb2/Rock2/Prkcb/Ptpn1/Nckap1l/Cyba/Dusp6/Flrt3/Col4a5/Plcg1/Yap1/Lyn/Erbb2/Ptpn6/Ptpn3/Stat5b/Fn1/Itgb1/Fgfr2/Kitl/Col1a2/Lrig1/Col23a1/Rps6ka1/Lama1/Pag1/Vav1/Ptprk/Jup/Mapkapk3/Stat5a/Col4a2/Col11a1	14173/20848/12223/12826/14182/12389/18576/16400/26362/18595/18791/12824/16776/24063/19730/330662/13649/16367/16410/14388/18596/12831/21826/17346/20852/14360/18212/19271/16779/19878/18751/19246/105855/13057/67603/71436/12830/18803/22601/17096/13866/15170/545622/20851/14268/16412/14183/17311/12843/16206/237759/20111/16772/94212/22324/19272/16480/102626/20850/12827/12814	61
R-MMU-397014	Muscle contraction	32|792	168|7898	0.000252584	0.00523035	ENSMUSG00000026414/ENSMUSG00000026728/ENSMUSG00000034810/ENSMUSG00000033161/ENSMUSG00000064179/ENSMUSG00000015968/ENSMUSG00000003161/ENSMUSG00000010066/ENSMUSG00000032412/ENSMUSG00000028469/ENSMUSG00000003352/ENSMUSG00000028207/ENSMUSG00000053519/ENSMUSG00000030409/ENSMUSG00000090122/ENSMUSG00000042644/ENSMUSG00000057182/ENSMUSG00000027940/ENSMUSG00000042828/ENSMUSG00000017412/ENSMUSG00000057897/…	Tnnt2/Vim/Scn7a/Atp1a1/Tnnt1/Cacna1d/Sri/Cacna2d2/Atp1b3/Npr2/Cacnb3/Asph/Kcnip1/Dmpk/Kcne1l/Itpr3/Scn3a/Tpm3/Trim72/Cacnb4/Camk2b/Kcnk9/Tpm4/Scn1a/Itpr1/Scn8a/Kcnk1/Camk2a/Itgb5/Camk2g/Scn3b/Kcnk3	21956/22352/20272/11928/21955/12289/109552/56808/11933/230103/12297/65973/70357/13400/66240/16440/20269/59069/434246/12298/12323/223604/326618/20265/16438/20273/16525/12322/16419/12325/235281/16527	32
R-MMU-977606	Regulation of Complement cascade	11|792	34|7898	0.00031563	0.00638024	ENSMUSG00000073418/ENSMUSG00000023224/ENSMUSG00000022037/ENSMUSG00000036905/ENSMUSG00000058952/ENSMUSG00000022912/ENSMUSG00000036887/ENSMUSG00000026365/ENSMUSG00000036896/ENSMUSG00000055172/ENSMUSG00000024164	C4b/Serping1/Clu/C1qb/Cfi/Pros1/C1qa/Cfh/C1qc/C1ra/C3	12268/12258/12759/12260/12630/19128/12259/12628/12262/50909/12266	11
R-MMU-2424491	DAP12 signaling	12|792	40|7898	0.000374828	0.00723248	ENSMUSG00000035929/ENSMUSG00000061232/ENSMUSG00000060802/ENSMUSG00000067212/ENSMUSG00000030579/ENSMUSG00000023992/ENSMUSG00000019843/ENSMUSG00000016206/ENSMUSG00000073409/ENSMUSG00000016933/ENSMUSG00000060550/ENSMUSG00000056116	H2-Q4/H2-K1/B2m/H2-T23/Tyrobp/Trem2/Fyn/H2-M3/H2-Q6/Plcg1/H2-Q7/H2-T22	15015/14972/12010/15040/22177/83433/14360/14991/110557/18803/15018/15039	12
R-MMU-5576892	Phase 0 - rapid depolarisation	12|792	40|7898	0.000374828	0.00723248	ENSMUSG00000034810/ENSMUSG00000015968/ENSMUSG00000010066/ENSMUSG00000003352/ENSMUSG00000057182/ENSMUSG00000017412/ENSMUSG00000057897/ENSMUSG00000064329/ENSMUSG00000023033/ENSMUSG00000024617/ENSMUSG00000021820/ENSMUSG00000049281	Scn7a/Cacna1d/Cacna2d2/Cacnb3/Scn3a/Cacnb4/Camk2b/Scn1a/Scn8a/Camk2a/Camk2g/Scn3b	20272/12289/56808/12297/20269/12298/12323/20265/20273/12322/12325/235281	12
R-MMU-202733	Cell surface interactions at the vascular wall	22|792	102|7898	0.000394424	0.00744146	ENSMUSG00000005087/ENSMUSG00000007655/ENSMUSG00000022912/ENSMUSG00000055447/ENSMUSG00000001507/ENSMUSG00000026415/ENSMUSG00000038235/ENSMUSG00000032412/ENSMUSG00000027087/ENSMUSG00000000290/ENSMUSG00000027009/ENSMUSG00000019843/ENSMUSG00000014361/ENSMUSG00000016933/ENSMUSG00000042228/ENSMUSG00000004266/ENSMUSG00000026193/ENSMUSG00000025809/ENSMUSG00000031990/ENSMUSG00000029661/ENSMUSG00000058715/…	Cd44/Cav1/Pros1/Cd47/Itga3/Fcamr/F11r/Atp1b3/Itgav/Itgb2/Itga4/Fyn/Mertk/Plcg1/Lyn/Ptpn6/Fn1/Itgb1/Jam3/Col1a2/Fcer1g/Itga6	12505/12389/19128/16423/16400/64435/16456/11933/16410/16414/16401/14360/17289/18803/17096/15170/14268/16412/83964/12843/14127/16403	22
R-MMU-446728	Cell junction organization	16|792	65|7898	0.000522315	0.00964011	ENSMUSG00000068699/ENSMUSG00000031328/ENSMUSG00000022656/ENSMUSG00000038235/ENSMUSG00000006411/ENSMUSG00000031841/ENSMUSG00000031673/ENSMUSG00000040511/ENSMUSG00000005338/ENSMUSG00000025510/ENSMUSG00000025809/ENSMUSG00000001552/ENSMUSG00000061048/ENSMUSG00000027111/ENSMUSG00000006219/ENSMUSG00000072115	Flnc/Flna/Nectin3/F11r/Nectin4/Cdh13/Cdh11/Pvr/Cadm3/Cd151/Itgb1/Jup/Cdh3/Itga6/Fblim1/Ang	68794/192176/58998/16456/71740/12554/12552/52118/94332/12476/16412/16480/12560/16403/74202/11727	16
R-MMU-8875878	MET promotes cell motility	11|792	36|7898	0.000549758	0.00978905	ENSMUSG00000001507/ENSMUSG00000022483/ENSMUSG00000015647/ENSMUSG00000031714/ENSMUSG00000026837/ENSMUSG00000052911/ENSMUSG00000026193/ENSMUSG00000025809/ENSMUSG00000029661/ENSMUSG00000032796/ENSMUSG00000027966	Itga3/Col2a1/Lama5/Gab1/Col5a1/Lamb2/Fn1/Itgb1/Col1a2/Lama1/Col11a1	16400/12824/16776/14388/12831/16779/14268/16412/12843/16772/12814	11
R-MMU-6811558	PI5P, PP2A and IER3 Regulate PI3K/AKT Signaling	20|792	91|7898	0.000553444	0.00978905	ENSMUSG00000037225/ENSMUSG00000082361/ENSMUSG00000031565/ENSMUSG00000029231/ENSMUSG00000024810/ENSMUSG00000020122/ENSMUSG00000055980/ENSMUSG00000031714/ENSMUSG00000024620/ENSMUSG00000019843/ENSMUSG00000059883/ENSMUSG00000024867/ENSMUSG00000025017/ENSMUSG00000062312/ENSMUSG00000031392/ENSMUSG00000032508/ENSMUSG00000030849/ENSMUSG00000019966/ENSMUSG00000034116/ENSMUSG00000022901	Fgf2/Btc/Fgfr1/Pdgfra/Il33/Egfr/Irs1/Gab1/Pdgfrb/Fyn/Irak4/Pip5k1b/Pik3ap1/Erbb2/Irak1/Myd88/Fgfr2/Kitl/Vav1/Cd86	14173/12223/14182/18595/77125/13649/16367/14388/18596/14360/266632/18719/83490/13866/16179/17874/14183/17311/22324/12524	20
R-MMU-1169410	Antiviral mechanism by IFN-stimulated genes	10|792	31|7898	0.000605961	0.0103763	ENSMUSG00000024079/ENSMUSG00000093661/ENSMUSG00000027078/ENSMUSG00000040296/ENSMUSG00000035692/ENSMUSG00000030107/ENSMUSG00000032596/ENSMUSG00000016933/ENSMUSG00000023341/ENSMUSG00000025278	Eif2ak2/Eif4e3/Ube2l6/Ddx58/Isg15/Usp18/Uba7/Plcg1/Mx2/Flnb	19106/66892/56791/230073/100038882/24110/74153/18803/17858/286940	10
R-MMU-8849932	Synaptic adhesion-like molecules	8|792	21|7898	0.00061109	0.0103763	ENSMUSG00000025892/ENSMUSG00000059714/ENSMUSG00000061981/ENSMUSG00000020524/ENSMUSG00000028399/ENSMUSG00000001986/ENSMUSG00000033295/ENSMUSG00000045045	Gria4/Flot1/Flot2/Gria1/Ptprd/Gria3/Ptprf/Lrfn4	14802/14251/14252/14799/19266/53623/19268/225875	8
R-MMU-1236974	ER-Phagosome pathway	9|792	26|7898	0.000634635	0.0105648	ENSMUSG00000035929/ENSMUSG00000061232/ENSMUSG00000060802/ENSMUSG00000067212/ENSMUSG00000037321/ENSMUSG00000016206/ENSMUSG00000073409/ENSMUSG00000060550/ENSMUSG00000056116	H2-Q4/H2-K1/B2m/H2-T23/Tap1/H2-M3/H2-Q6/H2-Q7/H2-T22	15015/14972/12010/15040/21354/14991/110557/15018/15039	9
R-MMU-975138	TRAF6 mediated induction of NFkB and MAP kinases upon TLR7/8 or 9 activation	18|792	80|7898	0.000768878	0.0125534	ENSMUSG00000028163/ENSMUSG00000022892/ENSMUSG00000025225/ENSMUSG00000039005/ENSMUSG00000066551/ENSMUSG00000066551/ENSMUSG00000019960/ENSMUSG00000059866/ENSMUSG00000059883/ENSMUSG00000038058/ENSMUSG00000031392/ENSMUSG00000046709/ENSMUSG00000032508/ENSMUSG00000060477/ENSMUSG00000024235/ENSMUSG00000033208/ENSMUSG00000003644/ENSMUSG00000032577	Nfkb1/App/Nfkb2/Tlr4/Hmgb1/Gm21596/Dusp6/Tnip2/Irak4/Nod1/Irak1/Mapk10/Myd88/Irak2/Map3k8/S100b/Rps6ka1/Mapkapk3	18033/11820/18034/21898/15289/100862258/67603/231130/266632/107607/16179/26414/17874/108960/26410/20203/20111/102626	18
R-MMU-168181	Toll Like Receptor 7/8 (TLR7/8) Cascade	18|792	81|7898	0.000898152	0.0141209	ENSMUSG00000028163/ENSMUSG00000022892/ENSMUSG00000025225/ENSMUSG00000039005/ENSMUSG00000066551/ENSMUSG00000066551/ENSMUSG00000019960/ENSMUSG00000059866/ENSMUSG00000059883/ENSMUSG00000038058/ENSMUSG00000031392/ENSMUSG00000046709/ENSMUSG00000032508/ENSMUSG00000060477/ENSMUSG00000024235/ENSMUSG00000033208/ENSMUSG00000003644/ENSMUSG00000032577	Nfkb1/App/Nfkb2/Tlr4/Hmgb1/Gm21596/Dusp6/Tnip2/Irak4/Nod1/Irak1/Mapk10/Myd88/Irak2/Map3k8/S100b/Rps6ka1/Mapkapk3	18033/11820/18034/21898/15289/100862258/67603/231130/266632/107607/16179/26414/17874/108960/26410/20203/20111/102626	18
R-MMU-975155	MyD88 dependent cascade initiated on endosome	18|792	81|7898	0.000898152	0.0141209	ENSMUSG00000028163/ENSMUSG00000022892/ENSMUSG00000025225/ENSMUSG00000039005/ENSMUSG00000066551/ENSMUSG00000066551/ENSMUSG00000019960/ENSMUSG00000059866/ENSMUSG00000059883/ENSMUSG00000038058/ENSMUSG00000031392/ENSMUSG00000046709/ENSMUSG00000032508/ENSMUSG00000060477/ENSMUSG00000024235/ENSMUSG00000033208/ENSMUSG00000003644/ENSMUSG00000032577	Nfkb1/App/Nfkb2/Tlr4/Hmgb1/Gm21596/Dusp6/Tnip2/Irak4/Nod1/Irak1/Mapk10/Myd88/Irak2/Map3k8/S100b/Rps6ka1/Mapkapk3	18033/11820/18034/21898/15289/100862258/67603/231130/266632/107607/16179/26414/17874/108960/26410/20203/20111/102626	18
R-MMU-416700	Other semaphorin interactions	6|792	13|7898	0.000921905	0.0142309	ENSMUSG00000030123/ENSMUSG00000030579/ENSMUSG00000023992/ENSMUSG00000026395/ENSMUSG00000063531/ENSMUSG00000030084	Plxnd1/Tyrobp/Trem2/Ptprc/Sema3e/Plxna1	67784/22177/83433/19264/20349/18844	6
R-MMU-1442490	Collagen degradation	12|792	44|7898	0.00097177	0.0147327	ENSMUSG00000031502/ENSMUSG00000000957/ENSMUSG00000022483/ENSMUSG00000031273/ENSMUSG00000026837/ENSMUSG00000028339/ENSMUSG00000031274/ENSMUSG00000029661/ENSMUSG00000063564/ENSMUSG00000021477/ENSMUSG00000031503/ENSMUSG00000027966	Col4a1/Mmp14/Col2a1/Col4a6/Col5a1/Col15a1/Col4a5/Col1a2/Col23a1/Ctsl/Col4a2/Col11a1	12826/17387/12824/94216/12831/12819/12830/12843/237759/13039/12827/12814	12
R-MMU-446652	Interleukin-1 family signaling	21|792	102|7898	0.00100964	0.0150383	ENSMUSG00000004040/ENSMUSG00000020227/ENSMUSG00000026072/ENSMUSG00000024338/ENSMUSG00000028163/ENSMUSG00000024810/ENSMUSG00000022892/ENSMUSG00000025225/ENSMUSG00000025888/ENSMUSG00000096727/ENSMUSG00000066551/ENSMUSG00000066551/ENSMUSG00000022216/ENSMUSG00000059866/ENSMUSG00000059883/ENSMUSG00000038058/ENSMUSG00000031392/ENSMUSG00000032508/ENSMUSG00000060477/ENSMUSG00000024235/ENSMUSG00000033208	Stat3/Irak3/Il1r1/Psmb8/Nfkb1/Il33/App/Nfkb2/Casp1/Psmb9/Hmgb1/Gm21596/Psme1/Tnip2/Irak4/Nod1/Irak1/Myd88/Irak2/Map3k8/S100b	20848/73914/16177/16913/18033/77125/11820/18034/12362/16912/15289/100862258/19186/231130/266632/107607/16179/17874/108960/26410/20203	21
R-MMU-445989	TAK1 activates NFkB by phosphorylation and activation of IKKs complex	9|792	28|7898	0.00116748	0.0170895	ENSMUSG00000028163/ENSMUSG00000022892/ENSMUSG00000025225/ENSMUSG00000066551/ENSMUSG00000066551/ENSMUSG00000038058/ENSMUSG00000031392/ENSMUSG00000060477/ENSMUSG00000033208	Nfkb1/App/Nfkb2/Hmgb1/Gm21596/Nod1/Irak1/Irak2/S100b	18033/11820/18034/15289/100862258/107607/16179/108960/20203	9
R-MMU-166058	MyD88:MAL(TIRAP) cascade initiated on plasma membrane	16|792	71|7898	0.00145611	0.0194152	ENSMUSG00000028163/ENSMUSG00000022892/ENSMUSG00000025225/ENSMUSG00000066551/ENSMUSG00000066551/ENSMUSG00000019960/ENSMUSG00000059866/ENSMUSG00000038058/ENSMUSG00000031392/ENSMUSG00000046709/ENSMUSG00000060477/ENSMUSG00000024235/ENSMUSG00000033208/ENSMUSG00000003644/ENSMUSG00000032577/ENSMUSG00000032041	Nfkb1/App/Nfkb2/Hmgb1/Gm21596/Dusp6/Tnip2/Nod1/Irak1/Mapk10/Irak2/Map3k8/S100b/Rps6ka1/Mapkapk3/Tirap	18033/11820/18034/15289/100862258/67603/231130/107607/16179/26414/108960/26410/20203/20111/102626/117149	16
R-MMU-168179	Toll Like Receptor TLR1:TLR2 Cascade	16|792	71|7898	0.00145611	0.0194152	ENSMUSG00000028163/ENSMUSG00000022892/ENSMUSG00000025225/ENSMUSG00000066551/ENSMUSG00000066551/ENSMUSG00000019960/ENSMUSG00000059866/ENSMUSG00000038058/ENSMUSG00000031392/ENSMUSG00000046709/ENSMUSG00000060477/ENSMUSG00000024235/ENSMUSG00000033208/ENSMUSG00000003644/ENSMUSG00000032577/ENSMUSG00000032041	Nfkb1/App/Nfkb2/Hmgb1/Gm21596/Dusp6/Tnip2/Nod1/Irak1/Mapk10/Irak2/Map3k8/S100b/Rps6ka1/Mapkapk3/Tirap	18033/11820/18034/15289/100862258/67603/231130/107607/16179/26414/108960/26410/20203/20111/102626/117149	16
R-MMU-168188	Toll Like Receptor TLR6:TLR2 Cascade	16|792	71|7898	0.00145611	0.0194152	ENSMUSG00000028163/ENSMUSG00000022892/ENSMUSG00000025225/ENSMUSG00000066551/ENSMUSG00000066551/ENSMUSG00000019960/ENSMUSG00000059866/ENSMUSG00000038058/ENSMUSG00000031392/ENSMUSG00000046709/ENSMUSG00000060477/ENSMUSG00000024235/ENSMUSG00000033208/ENSMUSG00000003644/ENSMUSG00000032577/ENSMUSG00000032041	Nfkb1/App/Nfkb2/Hmgb1/Gm21596/Dusp6/Tnip2/Nod1/Irak1/Mapk10/Irak2/Map3k8/S100b/Rps6ka1/Mapkapk3/Tirap	18033/11820/18034/15289/100862258/67603/231130/107607/16179/26414/108960/26410/20203/20111/102626/117149	16
R-MMU-181438	Toll Like Receptor 2 (TLR2) Cascade	16|792	71|7898	0.00145611	0.0194152	ENSMUSG00000028163/ENSMUSG00000022892/ENSMUSG00000025225/ENSMUSG00000066551/ENSMUSG00000066551/ENSMUSG00000019960/ENSMUSG00000059866/ENSMUSG00000038058/ENSMUSG00000031392/ENSMUSG00000046709/ENSMUSG00000060477/ENSMUSG00000024235/ENSMUSG00000033208/ENSMUSG00000003644/ENSMUSG00000032577/ENSMUSG00000032041	Nfkb1/App/Nfkb2/Hmgb1/Gm21596/Dusp6/Tnip2/Nod1/Irak1/Mapk10/Irak2/Map3k8/S100b/Rps6ka1/Mapkapk3/Tirap	18033/11820/18034/15289/100862258/67603/231130/107607/16179/26414/108960/26410/20203/20111/102626/117149	16
R-MMU-199418	Negative regulation of the PI3K/AKT network	20|792	98|7898	0.00147693	0.0194152	ENSMUSG00000037225/ENSMUSG00000082361/ENSMUSG00000031565/ENSMUSG00000029231/ENSMUSG00000024810/ENSMUSG00000020122/ENSMUSG00000055980/ENSMUSG00000031714/ENSMUSG00000024620/ENSMUSG00000019843/ENSMUSG00000059883/ENSMUSG00000024867/ENSMUSG00000025017/ENSMUSG00000062312/ENSMUSG00000031392/ENSMUSG00000032508/ENSMUSG00000030849/ENSMUSG00000019966/ENSMUSG00000034116/ENSMUSG00000022901	Fgf2/Btc/Fgfr1/Pdgfra/Il33/Egfr/Irs1/Gab1/Pdgfrb/Fyn/Irak4/Pip5k1b/Pik3ap1/Erbb2/Irak1/Myd88/Fgfr2/Kitl/Vav1/Cd86	14173/12223/14182/18595/77125/13649/16367/14388/18596/14360/266632/18719/83490/13866/16179/17874/14183/17311/22324/12524	20
R-MMU-933542	TRAF6 mediated NF-kB activation	6|792	14|7898	0.00147748	0.0194152	ENSMUSG00000028163/ENSMUSG00000022892/ENSMUSG00000025225/ENSMUSG00000066551/ENSMUSG00000066551/ENSMUSG00000033208	Nfkb1/App/Nfkb2/Hmgb1/Gm21596/S100b	18033/11820/18034/15289/100862258/20203	6
R-MMU-2172127	DAP12 interactions	12|792	46|7898	0.00148644	0.0194152	ENSMUSG00000035929/ENSMUSG00000061232/ENSMUSG00000060802/ENSMUSG00000067212/ENSMUSG00000030579/ENSMUSG00000023992/ENSMUSG00000019843/ENSMUSG00000016206/ENSMUSG00000073409/ENSMUSG00000016933/ENSMUSG00000060550/ENSMUSG00000056116	H2-Q4/H2-K1/B2m/H2-T23/Tyrobp/Trem2/Fyn/H2-M3/H2-Q6/Plcg1/H2-Q7/H2-T22	15015/14972/12010/15040/22177/83433/14360/14991/110557/18803/15018/15039	12
R-MMU-168138	Toll Like Receptor 9 (TLR9) Cascade	18|792	85|7898	0.00161738	0.0199037	ENSMUSG00000028163/ENSMUSG00000022892/ENSMUSG00000025225/ENSMUSG00000039005/ENSMUSG00000066551/ENSMUSG00000066551/ENSMUSG00000019960/ENSMUSG00000059866/ENSMUSG00000059883/ENSMUSG00000038058/ENSMUSG00000031392/ENSMUSG00000046709/ENSMUSG00000032508/ENSMUSG00000060477/ENSMUSG00000024235/ENSMUSG00000033208/ENSMUSG00000003644/ENSMUSG00000032577	Nfkb1/App/Nfkb2/Tlr4/Hmgb1/Gm21596/Dusp6/Tnip2/Irak4/Nod1/Irak1/Mapk10/Myd88/Irak2/Map3k8/S100b/Rps6ka1/Mapkapk3	18033/11820/18034/21898/15289/100862258/67603/231130/266632/107607/16179/26414/17874/108960/26410/20203/20111/102626	18
R-MMU-112308	Presynaptic depolarization and calcium channel opening	5|792	10|7898	0.00164106	0.0199037	ENSMUSG00000010066/ENSMUSG00000003352/ENSMUSG00000004113/ENSMUSG00000034656/ENSMUSG00000017412	Cacna2d2/Cacnb3/Cacna1b/Cacna1a/Cacnb4	56808/12297/12287/12286/12298	5
R-MMU-4641265	Repression of WNT target genes	5|792	10|7898	0.00164106	0.0199037	ENSMUSG00000032280/ENSMUSG00000034771/ENSMUSG00000055799/ENSMUSG00000008305/ENSMUSG00000000782	Tle3/Tle2/Tcf7l1/Tle1/Tcf7	21887/21886/21415/21885/21414	5
R-MMU-75892	Platelet Adhesion to exposed collagen	5|792	10|7898	0.00164106	0.0199037	ENSMUSG00000019843/ENSMUSG00000042228/ENSMUSG00000001930/ENSMUSG00000029661/ENSMUSG00000058715	Fyn/Lyn/Vwf/Col1a2/Fcer1g	14360/17096/22371/12843/14127	5
R-MMU-982772	Growth hormone receptor signaling	5|792	10|7898	0.00164106	0.0199037	ENSMUSG00000055737/ENSMUSG00000027540/ENSMUSG00000042228/ENSMUSG00000020919/ENSMUSG00000004043	Ghr/Ptpn1/Lyn/Stat5b/Stat5a	14600/19246/17096/20851/20850	5
R-MMU-114508	Effects of PIP2 hydrolysis	8|792	24|7898	0.00168199	0.0201128	ENSMUSG00000040479/ENSMUSG00000033174/ENSMUSG00000042644/ENSMUSG00000070738/ENSMUSG00000021108/ENSMUSG00000030102/ENSMUSG00000026778/ENSMUSG00000034731	Dgkz/Mgll/Itpr3/Dgkd/Prkch/Itpr1/Prkcq/Dgkh	104418/23945/16440/227333/18755/16438/18761/380921	8
R-MMU-373755	Semaphorin interactions	12|792	48|7898	0.00220731	0.0260279	ENSMUSG00000030123/ENSMUSG00000030579/ENSMUSG00000026640/ENSMUSG00000002233/ENSMUSG00000023992/ENSMUSG00000026395/ENSMUSG00000063531/ENSMUSG00000019843/ENSMUSG00000020580/ENSMUSG00000030084/ENSMUSG00000062312/ENSMUSG00000038387	Plxnd1/Tyrobp/Plxna2/Rhoc/Trem2/Ptprc/Sema3e/Fyn/Rock2/Plxna1/Erbb2/Rras	67784/22177/18845/11853/83433/19264/20349/14360/19878/18844/13866/20130	12
R-MMU-168164	Toll Like Receptor 3 (TLR3) Cascade	15|792	68|7898	0.00253446	0.0294762	ENSMUSG00000028163/ENSMUSG00000022892/ENSMUSG00000025225/ENSMUSG00000066551/ENSMUSG00000066551/ENSMUSG00000019960/ENSMUSG00000059866/ENSMUSG00000038058/ENSMUSG00000031392/ENSMUSG00000046709/ENSMUSG00000060477/ENSMUSG00000024235/ENSMUSG00000033208/ENSMUSG00000003644/ENSMUSG00000032577	Nfkb1/App/Nfkb2/Hmgb1/Gm21596/Dusp6/Tnip2/Nod1/Irak1/Mapk10/Irak2/Map3k8/S100b/Rps6ka1/Mapkapk3	18033/11820/18034/15289/100862258/67603/231130/107607/16179/26414/108960/26410/20203/20111/102626	15
R-MMU-1638074	Keratan sulfate/keratin metabolism	9|792	31|7898	0.00258932	0.0297072	ENSMUSG00000017929/ENSMUSG00000033350/ENSMUSG00000041577/ENSMUSG00000032038/ENSMUSG00000021665/ENSMUSG00000056124/ENSMUSG00000015027/ENSMUSG00000028538/ENSMUSG00000022793	B4galt5/Chst2/Prelp/St3gal4/Hexb/B4galt6/Galns/St3gal3/B4galt4	56336/54371/116847/20443/15212/56386/50917/20441/56375	9
R-MMU-166658	Complement cascade	11|792	43|7898	0.0027426	0.0303722	ENSMUSG00000073418/ENSMUSG00000023224/ENSMUSG00000022037/ENSMUSG00000036905/ENSMUSG00000058952/ENSMUSG00000022912/ENSMUSG00000036887/ENSMUSG00000026365/ENSMUSG00000036896/ENSMUSG00000055172/ENSMUSG00000024164	C4b/Serping1/Clu/C1qb/Cfi/Pros1/C1qa/Cfh/C1qc/C1ra/C3	12268/12258/12759/12260/12630/19128/12259/12628/12262/50909/12266	11
R-MMU-3000178	ECM proteoglycans	11|792	43|7898	0.0027426	0.0303722	ENSMUSG00000018593/ENSMUSG00000022483/ENSMUSG00000022892/ENSMUSG00000041936/ENSMUSG00000027087/ENSMUSG00000026837/ENSMUSG00000026193/ENSMUSG00000025809/ENSMUSG00000029661/ENSMUSG00000039115/ENSMUSG00000022817	Sparc/Col2a1/App/Agrn/Itgav/Col5a1/Fn1/Itgb1/Col1a2/Itga9/Itgb5	20692/12824/11820/11603/16410/12831/14268/16412/12843/104099/16419	11
R-MMU-166016	Toll Like Receptor 4 (TLR4) Cascade	20|792	103|7898	0.0027546	0.0303722	ENSMUSG00000028163/ENSMUSG00000021423/ENSMUSG00000022892/ENSMUSG00000025225/ENSMUSG00000000290/ENSMUSG00000039005/ENSMUSG00000066551/ENSMUSG00000066551/ENSMUSG00000021624/ENSMUSG00000019960/ENSMUSG00000059866/ENSMUSG00000038058/ENSMUSG00000031392/ENSMUSG00000046709/ENSMUSG00000060477/ENSMUSG00000024235/ENSMUSG00000033208/ENSMUSG00000003644/ENSMUSG00000032577/ENSMUSG00000032041	Nfkb1/Ly86/App/Nfkb2/Itgb2/Tlr4/Hmgb1/Gm21596/Cd180/Dusp6/Tnip2/Nod1/Irak1/Mapk10/Irak2/Map3k8/S100b/Rps6ka1/Mapkapk3/Tirap	18033/17084/11820/18034/16414/21898/15289/100862258/17079/67603/231130/107607/16179/26414/108960/26410/20203/20111/102626/117149	20
R-MMU-392170	ADP signalling through P2Y purinoceptor 12	7|792	21|7898	0.00327746	0.0348923	ENSMUSG00000023439/ENSMUSG00000029713/ENSMUSG00000032562/ENSMUSG00000036402/ENSMUSG00000000001/ENSMUSG00000057614/ENSMUSG00000036353	Gnb3/Gnb2/Gnai2/Gng12/Gnai3/Gnai1/P2ry12	14695/14693/14678/14701/14679/14677/70839	7
R-MMU-418990	Adherens junctions interactions	9|792	32|7898	0.00328817	0.0348923	ENSMUSG00000022656/ENSMUSG00000006411/ENSMUSG00000031841/ENSMUSG00000031673/ENSMUSG00000040511/ENSMUSG00000005338/ENSMUSG00000001552/ENSMUSG00000061048/ENSMUSG00000072115	Nectin3/Nectin4/Cdh13/Cdh11/Pvr/Cadm3/Jup/Cdh3/Ang	58998/71740/12554/12552/52118/94332/16480/12560/11727	9
R-MMU-3000170	Syndecan interactions	6|792	16|7898	0.00330628	0.0348923	ENSMUSG00000037225/ENSMUSG00000027087/ENSMUSG00000026193/ENSMUSG00000025809/ENSMUSG00000027111/ENSMUSG00000022817	Fgf2/Itgav/Fn1/Itgb1/Itga6/Itgb5	14173/16410/14268/16412/16403/16419	6
R-MMU-168142	Toll Like Receptor 10 (TLR10) Cascade	15|792	70|7898	0.00341115	0.0348923	ENSMUSG00000028163/ENSMUSG00000022892/ENSMUSG00000025225/ENSMUSG00000066551/ENSMUSG00000066551/ENSMUSG00000019960/ENSMUSG00000059866/ENSMUSG00000038058/ENSMUSG00000031392/ENSMUSG00000046709/ENSMUSG00000060477/ENSMUSG00000024235/ENSMUSG00000033208/ENSMUSG00000003644/ENSMUSG00000032577	Nfkb1/App/Nfkb2/Hmgb1/Gm21596/Dusp6/Tnip2/Nod1/Irak1/Mapk10/Irak2/Map3k8/S100b/Rps6ka1/Mapkapk3	18033/11820/18034/15289/100862258/67603/231130/107607/16179/26414/108960/26410/20203/20111/102626	15
R-MMU-168176	Toll Like Receptor 5 (TLR5) Cascade	15|792	70|7898	0.00341115	0.0348923	ENSMUSG00000028163/ENSMUSG00000022892/ENSMUSG00000025225/ENSMUSG00000066551/ENSMUSG00000066551/ENSMUSG00000019960/ENSMUSG00000059866/ENSMUSG00000038058/ENSMUSG00000031392/ENSMUSG00000046709/ENSMUSG00000060477/ENSMUSG00000024235/ENSMUSG00000033208/ENSMUSG00000003644/ENSMUSG00000032577	Nfkb1/App/Nfkb2/Hmgb1/Gm21596/Dusp6/Tnip2/Nod1/Irak1/Mapk10/Irak2/Map3k8/S100b/Rps6ka1/Mapkapk3	18033/11820/18034/15289/100862258/67603/231130/107607/16179/26414/108960/26410/20203/20111/102626	15
R-MMU-975871	MyD88 cascade initiated on plasma membrane	15|792	70|7898	0.00341115	0.0348923	ENSMUSG00000028163/ENSMUSG00000022892/ENSMUSG00000025225/ENSMUSG00000066551/ENSMUSG00000066551/ENSMUSG00000019960/ENSMUSG00000059866/ENSMUSG00000038058/ENSMUSG00000031392/ENSMUSG00000046709/ENSMUSG00000060477/ENSMUSG00000024235/ENSMUSG00000033208/ENSMUSG00000003644/ENSMUSG00000032577	Nfkb1/App/Nfkb2/Hmgb1/Gm21596/Dusp6/Tnip2/Nod1/Irak1/Mapk10/Irak2/Map3k8/S100b/Rps6ka1/Mapkapk3	18033/11820/18034/15289/100862258/67603/231130/107607/16179/26414/108960/26410/20203/20111/102626	15
R-MMU-425407	SLC-mediated transmembrane transport	34|792	211|7898	0.00347509	0.0351232	ENSMUSG00000055368/ENSMUSG00000024935/ENSMUSG00000037490/ENSMUSG00000059336/ENSMUSG00000003617/ENSMUSG00000017765/ENSMUSG00000030737/ENSMUSG00000006576/ENSMUSG00000003161/ENSMUSG00000022462/ENSMUSG00000036298/ENSMUSG00000013275/ENSMUSG00000060961/ENSMUSG00000026177/ENSMUSG00000043885/ENSMUSG00000005360/ENSMUSG00000003153/ENSMUSG00000029843/ENSMUSG00000028542/ENSMUSG00000020142/ENSMUSG00000040569/…	Slc6a2/Slc1a1/Slc2a12/Slc14a1/Cp/Slc12a4/Slco2b1/Slc4a3/Sri/Slc38a2/Slc2a13/Slc41a1/Slc4a4/Slc11a1/Slc36a4/Slc1a3/Slc2a3/Slc13a4/Slc6a9/Slc1a4/Slc26a7/Slc39a1/Heph/Slc16a2/Slc12a7/Ahcyl2/Slc4a10/Slc26a1/Slc9a6/Emb/Slc6a1/Slc8b1/Slc5a7/Slc24a2	20538/20510/353169/108052/12870/20498/101488/20536/109552/67760/239606/98396/54403/18173/234967/20512/20527/243755/14664/55963/208890/30791/15203/20502/20499/74340/94229/231583/236794/13723/232333/170756/63993/76376	34
R-MMU-1855204	Synthesis of IP3 and IP4 in the cytosol	8|792	27|7898	0.0038713	0.0386675	ENSMUSG00000024998/ENSMUSG00000024960/ENSMUSG00000039943/ENSMUSG00000052160/ENSMUSG00000016933/ENSMUSG00000010660/ENSMUSG00000057963/ENSMUSG00000032737	Plce1/Plcb3/Plcb4/Pld4/Plcg1/Plcd1/Itpk1/Inppl1	74055/18797/18798/104759/18803/18799/217837/16332	8
R-MMU-983170	Antigen Presentation: Folding, assembly and peptide loading of class I MHC	9|792	33|7898	0.00412722	0.0404918	ENSMUSG00000035929/ENSMUSG00000061232/ENSMUSG00000060802/ENSMUSG00000067212/ENSMUSG00000037321/ENSMUSG00000016206/ENSMUSG00000073409/ENSMUSG00000060550/ENSMUSG00000056116	H2-Q4/H2-K1/B2m/H2-T23/Tap1/H2-M3/H2-Q6/H2-Q7/H2-T22	15015/14972/12010/15040/21354/14991/110557/15018/15039	9
R-MMU-8948216	Collagen chain trimerization	10|792	39|7898	0.00414934	0.0404918	ENSMUSG00000031502/ENSMUSG00000022483/ENSMUSG00000031273/ENSMUSG00000026837/ENSMUSG00000028339/ENSMUSG00000031274/ENSMUSG00000029661/ENSMUSG00000063564/ENSMUSG00000031503/ENSMUSG00000027966	Col4a1/Col2a1/Col4a6/Col5a1/Col15a1/Col4a5/Col1a2/Col23a1/Col4a2/Col11a1	12826/12824/94216/12831/12819/12830/12843/237759/12827/12814	10
R-MMU-210990	PECAM1 interactions	5|792	12|7898	0.00434734	0.0414707	ENSMUSG00000027087/ENSMUSG00000019843/ENSMUSG00000016933/ENSMUSG00000042228/ENSMUSG00000004266	Itgav/Fyn/Plcg1/Lyn/Ptpn6	16410/14360/18803/17096/15170	5
R-MMU-909733	Interferon alpha/beta signaling	5|792	12|7898	0.00434734	0.0414707	ENSMUSG00000053113/ENSMUSG00000002325/ENSMUSG00000030107/ENSMUSG00000027540/ENSMUSG00000004266	Socs3/Irf9/Usp18/Ptpn1/Ptpn6	12702/16391/24110/19246/15170	5
R-MMU-5173105	O-linked glycosylation	18|792	93|7898	0.00454735	0.0428966	ENSMUSG00000022893/ENSMUSG00000017929/ENSMUSG00000038156/ENSMUSG00000032038/ENSMUSG00000060988/ENSMUSG00000023885/ENSMUSG00000037280/ENSMUSG00000042784/ENSMUSG00000091387/ENSMUSG00000056124/ENSMUSG00000030022/ENSMUSG00000038843/ENSMUSG00000022894/ENSMUSG00000006403/ENSMUSG00000028538/ENSMUSG00000024299/ENSMUSG00000021903/ENSMUSG00000051950	Adamts1/B4galt5/Spon1/St3gal4/Galnt13/Thbs2/Galnt6/Muc1/Gcnt4/B4galt6/Adamts9/Gcnt1/Adamts5/Adamts4/St3gal3/Adamts10/Galnt15/B3glct	11504/56336/233744/20443/271786/21826/207839/17829/218476/56386/101401/14537/23794/240913/20441/224697/78754/381694	18
R-MMU-421270	Cell-cell junction organization	10|792	40|7898	0.00504687	0.0470856	ENSMUSG00000022656/ENSMUSG00000038235/ENSMUSG00000006411/ENSMUSG00000031841/ENSMUSG00000031673/ENSMUSG00000040511/ENSMUSG00000005338/ENSMUSG00000001552/ENSMUSG00000061048/ENSMUSG00000072115	Nectin3/F11r/Nectin4/Cdh13/Cdh11/Pvr/Cadm3/Jup/Cdh3/Ang	58998/16456/71740/12554/12552/52118/94332/16480/12560/11727	10
R-MMU-6806834	Signaling by MET	15|792	73|7898	0.00517929	0.0477959	ENSMUSG00000004040/ENSMUSG00000001507/ENSMUSG00000022483/ENSMUSG00000015647/ENSMUSG00000031714/ENSMUSG00000026837/ENSMUSG00000025314/ENSMUSG00000052911/ENSMUSG00000027540/ENSMUSG00000026193/ENSMUSG00000025809/ENSMUSG00000029661/ENSMUSG00000030029/ENSMUSG00000032796/ENSMUSG00000027966	Stat3/Itga3/Col2a1/Lama5/Gab1/Col5a1/Ptprj/Lamb2/Ptpn1/Fn1/Itgb1/Col1a2/Lrig1/Lama1/Col11a1	20848/16400/12824/16776/14388/12831/19271/16779/19246/14268/16412/12843/16206/16772/12814	15
